# Supplementary material for: Rapid effects of valproic acid on the fetal brain transcriptome: implications for brain development and autism
Source: PubMed Central journal article supplement — Transl Psychiatry. 2024 Dec 4;14:482. doi: 10.1038/s41398-024-03179-1 (PMC11618798; doi:10.1038/s41398-024-03179-1), 2024-12-04
Supplement: 41398_2024_3179_MOESM2_ESM.pdf [file 41398_2024_3179_MOESM2_ESM.pdf]

| Gene          | VPA  |      |       |      |      |      |      | Control       |       |       |       |       |       |        | VPA    |               |        |        |        |        |        | Control |        |               |        |        |        |        | Gene          |               |        |
|---------------|------|------|-------|------|------|------|------|---------------|-------|-------|-------|-------|-------|--------|--------|---------------|--------|--------|--------|--------|--------|---------|--------|---------------|--------|--------|--------|--------|---------------|---------------|--------|
|               | male | male | male  | male | male | male | male | male          | male  | male  | male  | male  | male  | female | female | female        | female | female | female | female | female | female  | female | female        | female | female | female | female |               | female        | female |
|               | V1A  | V2B  | V3B   | V4C  | V5A  | V6D  | V7A  | C1D           | C2A   | C3A   | C4C   | C5C   | C6B   | C7A    | V1B    | V2A           | V3A    | V4A    | V5F    | V6A    | V7C    | C1A     | C2C    | C3B           | C4A    | C5A    | C6A    | C7C    |               |               |        |
| 0610009B22Rik | 889  | 916  | 1136  | 1004 | 1019 | 818  | 1186 | 1299          | 1121  | 1125  | 1088  | 1047  | 1159  | 1361   | 1085   | 935           | 1272   | 1159   | 973    | 1312   | 1147   | 954     | 1213   | 1193          | 1083   | 1315   | 1189   | 1386   | 0610009B22Rik |               |        |
| 0610010K14Rik | 161  | 201  | 247   | 240  | 225  | 229  | 235  | 255           | 220   | 289   | 272   | 235   | 257   | 303    | 170    | 141           | 240    | 222    | 214    | 178    | 268    | 249     | 195    | 284           | 213    | 294    | 235    | 285    | 0610010K14Rik |               |        |
| 0610012G03Rik | 1219 | 1420 | 1049  | 1073 | 1100 | 1032 | 1244 | 1369          | 1296  | 1490  | 1337  | 1334  | 1323  | 1464   | 1131   | 975           | 1258   | 1158   | 1292   | 1358   | 1244   | 1390    | 1335   | 1381          | 1416   | 1561   | 1281   | 1362   | 0610012G03Rik |               |        |
| 0610030E20Rik | 114  | 41   | 39    | 82   | 66   | 34   | 48   | 85            | 49    | 52    | 57    | 88    | 67    | 64     | 70     | 56            | 42     | 42     | 55     | 31     | 32     | 77      | 65     | 60            | 50     | 56     | 66     | 64     | 0610030E20Rik |               |        |
| 0610040J01Rik | 114  | 124  | 90    | 90   | 141  | 114  | 112  | 103           | 129   | 115   | 149   | 59    | 90    | 81     | 104    | 144           | 82     | 108    | 115    | 93     | 117    | 100     | 158    | 102           | 93     | 86     | 60     | 71     | 0610040J01Rik |               |        |
| 1110002E22Rik | 37   | 39   | 12    | 64   | 55   | 64   | 41   | 59            | 105   | 58    | 555   | 36    | 87    | 21     | 47     | 61            | 44     | 72     | 45     | 35     | 37     | 93      | 119    | 374           | 57     | 55     | 17     | 26     | 15            | 1110002E22Rik |        |
| 1110004F10Rik | 8880 | 8767 | 10225 | 8794 | 8571 | 8678 | 9571 | 10492         | 10156 | 10830 | 10106 | 11692 | 10727 | 13064  | 8923   | 8181          | 9616   | 8556   | 8933   | 10116  | 9400   | 9535    | 9716   | 11709         | 11517  | 13661  | 12535  | 13996  | 1110004F10Rik |               |        |
| 1110017D15Rik | 378  | 536  | 364   | 737  | 653  | 571  | 607  | 139           | 152   | 161   | 113   | 167   | 221   | 130    | 375    | 508           | 561    | 810    | 659    | 573    | 676    | 199     | 207    | 148           | 152    | 148    | 143    | 159    | 1110017D15Rik |               |        |
| 1110025L11Rik | 0    | 0    | 0     | 0    | 0    | 4    | 0    | 0             | 0     | 0     | 0     | 0     | 0     | 0      | 0      | 0             | 0      | 0      | 0      | 0      | 0      | 0       | 0      | 0             | 0      | 0      | 0      | 0      | 0             | 1110025L11Rik |        |
| 1110032A03Rik | 1526 | 1495 | 1335  | 1422 | 1508 | 1352 | 1501 | 1387          | 1308  | 1290  | 1173  | 1218  | 1439  | 1397   | 1683   | 1391          | 1428   | 1305   | 1340   | 1629   | 1547   | 1365    | 1394   | 1242          | 1281   | 1401   | 1399   | 1310   | 1110032A03Rik |               |        |
| 1110032F04Rik | 223  | 177  | 220   | 271  | 316  | 279  | 286  | 201           | 265   | 247   | 253   | 250   | 204   | 208    | 257    | 178           | 301    | 282    | 334    | 294    | 311    | 284     | 273    | 246           | 301    | 187    | 207    | 179    | 1110032F04Rik |               |        |
| 1110038F14Rik | 1068 | 1168 | 1434  | 1223 | 1211 | 1069 | 1091 | 1480          | 1795  | 1828  | 1883  | 1977  | 1907  | 1876   | 984    | 1148          | 1333   | 1125   | 1297   | 1254   | 963    | 1529    | 1772   | 2106          | 1763   | 2534   | 2164   | 2143   | 1110038F14Rik |               |        |
| 1110051M20Rik | 3398 | 3971 | 2817  | 3503 | 3466 | 3307 | 3832 | 3677          | 3426  | 3345  | 3121  | 3515  | 3272  | 3859   | 3611   | 3168          | 3231   | 3374   | 3607   | 3762   | 3751   | 3740    | 3447   | 3495          | 3605   | 3709   | 3475   | 3893   | 1110051M20Rik |               |        |
| 1110059E24Rik | 4479 | 3648 | 3903  | 3464 | 3004 | 3331 | 3923 | 1110059E24Rik | 4479  | 3648  | 3903  | 3464  | 3004  | 3331   | 3923   | 1110059E24Rik | 4479   | 3648   | 3903   | 3464   | 3004   | 3331    | 3923   | 1110059E24Rik | 4479   | 3648   | 3903   | 3464   | 3004          | 3331          | 3923   |
| 1110059G10Rik | 867  | 633  | 827   | 865  | 818  | 751  | 896  | 1489          | 1233  | 1346  | 1231  | 1328  | 1296  | 1586   | 853    | 643           | 819    | 710    | 871    | 1030   | 820    | 1193    | 1311   | 1469          | 1297   | 1459   | 1474   | 1455   | 1110059G10Rik |               |        |
| 1110065P20Rik | 751  | 875  | 640   | 875  | 832  | 829  | 790  | 901           | 887   | 883   | 824   | 974   | 900   | 867    | 736    | 833           | 885    | 763    | 780    | 873    | 837    | 714     | 830    | 893           | 887    | 915    | 809    | 946    | 1110065P20Rik |               |        |
| 1190005I06Rik | 1    | 10   | 12    | 9    | 6    | 10   | 8    | 4             | 3     | 8     | 3     | 0     | 1     | 3      | 3      | 11            | 12     | 12     | 0      | 7      | 10     | 2       | 5      | 2             | 2      | 2      | 6      | 4      | 1190005I06Rik |               |        |
| 1190007I07Rik | 344  | 300  | 409   | 286  | 391  | 379  | 399  | 491           | 438   | 616   | 474   | 579   | 556   | 613    | 330    | 276           | 341    | 314    | 316    | 377    | 338    | 528     | 440    | 614           | 616    | 566    | 539    | 622    | 1190007I07Rik |               |        |
| 1300017J02Rik | 82   | 141  | 166   | 58   | 29   | 52   | 21   | 38            | 43    | 43    | 36    | 71    | 322   | 192    | 83     | 129           | 81     | 39     | 54     | 37     | 55     | 23      | 30     | 38            | 12     | 89     | 141    | 354    | 1300017J02Rik |               |        |
| 1500009C09Rik | 1323 | 1836 | 1364  | 2377 | 2398 | 2307 | 2767 | 1305          | 1200  | 1518  | 1149  | 1338  | 792   | 1484   | 1669   | 934           | 2168   | 2206   | 2906   | 2534   | 3084   | 1369    | 1177   | 1398          | 1705   | 1138   | 1088   | 1298   | 1500009C09Rik |               |        |
| 1500009L16Rik | 1430 | 1353 | 1500  | 1454 | 1334 | 1292 | 1655 | 880           | 773   | 827   | 753   | 770   | 814   | 935    | 1547   | 1439          | 1534   | 1384   | 1280   | 1422   | 1482   | 819     | 858    | 805           | 871    | 893    | 823    | 1013   | 1500009L16Rik |               |        |
| 1500011B03Rik | 3831 | 3873 | 3538  | 4049 | 4017 | 3838 | 4421 | 4070          | 3508  | 4004  | 3484  | 3696  | 3498  | 4078   | 4237   | 3294          | 4172   | 3954   | 3919   | 4287   | 4412   | 4111    | 3358   | 3809          | 4131   | 3838   | 3691   | 3983   | 1500011B03Rik |               |        |
| 1520401A03Rik | 33   | 10   | 13    | 41   | 43   | 17   | 35   | 22            | 44    | 27    | 184   | 14    | 16    | 27     | 20     | 19            | 35     | 22     | 25     | 20     | 25     | 43      | 111    | 19            | 23     | 18     | 9      | 12     | 1520401A03Rik |               |        |
| 1600012H06Rik | 2230 | 2017 | 1955  | 2029 | 1621 | 1754 | 2006 | 2176          | 2165  | 2010  | 2152  | 2038  | 2203  | 2087   | 2341   | 2245          | 1920   | 2001   | 1718   | 2071   | 1779   | 2095    | 2273   | 1995          | 1886   | 2494   | 2172   | 2238   | 1600012H06Rik |               |        |
| 1600014C10Rik | 685  | 747  | 749   | 653  | 853  | 726  | 670  | 1465          | 1303  | 1409  | 1358  | 1159  | 1275  | 1180   | 819    | 776           | 781    | 637    | 655    | 781    | 679    | 1480    | 1405   | 1332          | 1243   | 1188   | 1226   | 1280   | 1600014C10Rik |               |        |
| 1600014C23Rik | 1    | 0    | 1     | 0    | 0    | 0    | 0    | 1             | 1     | 1     | 3     | 0     | 2     | 3      | 7      | 2             | 0      | 7      | 1      | 3      | 2      | 0       | 3      | 3             | 1      | 4      | 1      | 7      | 1600014C23Rik |               |        |
| 1700001C19Rik | 3    | 0    | 2     | 0    | 1    | 3    | 4    | 0             | 4     | 2     | 0     | 1     | 5     | 4      | 0      | 3             | 1      | 0      | 3      | 1      | 2      | 4       | 3      | 3             | 3      | 1      | 3      | 0      | 2             | 1700001C19Rik |        |
| 1700001F09Rik | 0    | 0    | 0     | 0    | 0    | 0    | 0    | 1             | 1     | 0     | 8     | 0     | 0     | 3      | 3      | 1             | 0      | 0      | 1      | 0      | 2      | 0       | 5      | 1             | 2      | 0      | 0      | 0      | 0             | 1700001F09Rik |        |
| 1700001J03Rik | 24   | 34   | 52    | 72   | 74   | 54   | 50   | 10            | 12    | 14    | 28    | 24    | 5     | 21     | 59     | 25            | 57     | 80     | 57     | 30     | 48     | 22      | 13     | 16            | 10     | 28     | 28     | 14     | 1700001J03Rik |               |        |
| 1700001K19Rik | 0    | 1    | 0     | 1    | 0    | 0    | 1    | 0             | 0     | 0     | 0     | 0     | 0     | 0      | 0      | 0             | 0      | 0      | 0      | 0      | 0      | 0       | 0      | 0             | 0      | 0      | 0      | 0      | 0             | 1700001K19Rik |        |
| 1700001L19Rik | 104  | 96   | 127   | 167  | 160  | 116  | 113  | 56            | 53    | 63    | 57    | 53    | 70    | 48     | 137    | 109           | 123    | 109    | 137    | 108    | 132    | 77      | 54     | 40            | 62     | 58     | 40     | 49     | 1700001L19Rik |               |        |
| 1700001O22Rik | 251  | 309  | 294   | 300  | 243  | 242  | 269  | 64            | 121   | 80    | 76    | 139   | 90    | 99     | 227    | 248           | 329    | 281    | 288    | 247    | 244    | 72      | 87     | 122           | 79     | 171    | 94     | 107    | 1700001O22Rik |               |        |
| 1700001P01Rik | 54   | 64   | 88    | 88   | 89   | 78   | 58   | 7             | 30    | 23    | 27    | 62    | 33    | 37     | 36     | 49            | 81     | 107    | 83     | 64     | 51     | 40      | 32     | 40            | 41     | 49     | 27     | 25     | 1700001P01Rik |               |        |
| 1700003E16Rik | 294  | 516  | 370   | 450  | 369  | 357  | 326  | 76            | 86    | 118   | 77    | 78    | 103   | 48     | 286    | 368           | 454    | 494    | 402    | 349    | 374    | 80      | 139    | 98            | 90     | 122    | 66     | 76     | 1700003E16Rik |               |        |
| 1700003F12Rik | 10   | 22   | 23    | 18   | 16   | 26   | 17   | 7             | 4     | 12    | 10    | 21    | 17    | 16     | 17     | 30            | 12     | 7      | 20     | 21     | 17     | 10      | 12     | 10            | 17     | 6      | 12     | 16     | 11            | 1700003F12Rik |        |
| 1700006A11Rik | 0    | 0    | 0     | 0    | 0    | 0    | 0    | 0             | 0     | 0     | 0     | 0     | 0     | 0      | 0      | 0             | 0      | 1      | 0      | 0      | 0      | 0       | 0      | 0             | 0      | 0      | 0      | 0      | 0             | 1700006A11Rik |        |
| 1700007K13Rik | 81   | 78   | 71    | 80   | 66   | 87   | 64   | 38            | 40    | 57    | 32    | 54    | 60    | 64     | 102    | 100           | 51     | 64     | 58     | 77     | 79     | 35      | 78     | 47            | 40     | 49     | 46     | 51     | 1700007K13Rik |               |        |
| 1700008O03Rik | 33   | 38   | 48    | 42   | 44   | 68   | 30   | 31            | 59    | 25    | 48    | 56    | 53    | 39     | 24     | 28            | 48     | 23     | 37     | 40     | 29     | 23      | 49     | 33            | 47     | 70     | 36     | 69     | 1700008O03Rik |               |        |
| 1700008P02Rik | 0    | 0    | 0     | 0    | 0    | 0    | 0    | 1             | 0     | 0     | 0     | 0     | 0     | 0      | 0      | 0             | 0      | 0      | 0      | 0      | 0      | 2       | 0      | 0             | 0      | 0      | 0      | 0      | 0             | 1700008P02Rik |        |
| 1700009N14Rik | 0    | 1    | 0     | 6    | 0    | 0    | 0    | 0             | 0     | 0     | 4     | 3     | 3     | 1      | 5      | 4             | 3      | 0      | 0      | 0      | 0      | 2       | 5      | 0             | 2      | 5      | 13     | 1      | 1700009N14Rik |               |        |
| 1700010B08Rik | 1    | 1    | 1     | 0    | 2    | 4    | 3    | 1             | 0     | 0     | 0     | 2     | 0     | 0      | 3      | 2             | 0      | 0      | 0      | 3      | 1      | 0       | 1      | 0             | 1      | 0      | 1      | 0      | 0             | 1700010B08Rik |        |
| 1700010I14Rik | 197  | 192  | 236   | 188  | 160  | 195  | 149  | 175           | 170   | 187   | 161   | 237   | 228   | 233    | 227    | 183           | 245    | 183    | 146    | 196    | 151    | 180     | 161    | 194           | 191    | 218    | 275    | 258    | 1700010I14Rik |               |        |
| 1700011L22Rik | 1    | 3    | 1     | 2    | 7    | 26   | 4    | 4             | 4     | 0     | 1     | 0     | 6     | 11     | 5      | 6             | 3      | 3      | 6      | 5      | 13     | 8       | 3      | 2             | 6      | 1      | 5      | 0      | 1700011L22Rik |               |        |
| 1700011M02Rik | 0    | 0    | 0     | 0    | 0    | 0    | 0    | 0             | 0     | 0     | 1     | 0     | 0     | 0      | 0      | 0             | 0      | 0      | 0      | 0      | 0      | 0       | 0      | 0             | 0      | 0      | 0      | 0      | 0             | 1700011M02Rik |        |
| 1700012B07Rik | 0    | 0    | 0     | 0    | 0    | 0    | 0    | 1             | 0     | 0     | 0     | 1     | 0     | 0      | 0      | 0             | 0      | 0      | 0      | 0      | 0      | 0       | 0      | 0             | 0      | 0      | 1      | 0      | 0             | 1700012B07Rik |        |
| 1700012B09Rik | 15   | 21   | 3     | 8    | 22   | 35   | 25   | 28            | 16    | 21    | 18    | 26    | 43    | 23     | 36     | 31            | 2      | 18     | 10     | 24     | 19     | 35      | 41     | 28            | 17     | 36     | 13     | 14     | 1700012B09Rik |               |        |
| 1700012P22Rik | 1    | 2    | 1     | 0    | 0    | 7    | 0    | 1             | 3     | 5     | 3     | 7     | 15    | 0      | 1      | 2             | 0      | 0      | 0      | 2      | 0      | 3       | 8      | 0             | 0      | 0      | 0      | 0      | 0             | 1700012P22Rik |        |
| 1700013F07Rik | 38   | 37   | 35    | 59   | 52   | 63   | 45   | 37            | 53    | 38    | 40    | 30    | 45    | 43     | 26     | 41            | 46     | 36     | 44     |        |        |         |        |               |        |        |        |        |               |               |        |

|               |      |      |      |      |      |      |      |      |      |      |      |      |      |      |      |      |      |      |      |      |      |      |      |      |      |      |      |      |               |
|---------------|------|------|------|------|------|------|------|------|------|------|------|------|------|------|------|------|------|------|------|------|------|------|------|------|------|------|------|------|---------------|
| 1700028P14RIK | 35   | 27   | 8    | 23   | 21   | 42   | 31   | 35   | 35   | 19   | 27   | 24   | 37   | 28   | 41   | 30   | 7    | 33   | 26   | 33   | 31   | 42   | 50   | 24   | 32   | 20   | 35   | 25   | 1700028P14RIK |
| 1700029H14RIK | 9    | 16   | 6    | 3    | 2    | 12   | 4    | 1    | 6    | 1    | 0    | 4    | 1    | 0    | 13   | 10   | 6    | 4    | 2    | 4    | 2    | 2    | 1    | 0    | 3    | 3    | 6    | 2    | 1700029H14RIK |
| 1700029I15RIK | 102  | 117  | 137  | 148  | 124  | 108  | 89   | 82   | 83   | 90   | 86   | 115  | 90   | 81   | 104  | 103  | 138  | 122  | 138  | 94   | 99   | 107  | 87   | 92   | 101  | 90   | 80   | 106  | 1700029I15RIK |
| 1700029J07RIK | 208  | 226  | 224  | 248  | 262  | 244  | 274  | 506  | 446  | 493  | 517  | 383  | 387  | 419  | 265  | 217  | 305  | 263  | 260  | 255  | 259  | 536  | 495  | 434  | 479  | 375  | 483  | 392  | 1700029J07RIK |
| 1700030J22RIK | 599  | 848  | 707  | 735  | 664  | 703  | 651  | 372  | 356  | 425  | 334  | 346  | 400  | 349  | 608  | 720  | 703  | 792  | 711  | 603  | 703  | 438  | 368  | 376  | 449  | 260  | 381  | 323  | 1700030J22RIK |
| 1700030K09RIK | 176  | 169  | 226  | 231  | 328  | 253  | 251  | 1303 | 1388 | 1474 | 1504 | 1340 | 1337 | 1344 | 200  | 160  | 255  | 206  | 330  | 293  | 264  | 1419 | 1298 | 1455 | 1632 | 1405 | 1446 | 1356 | 1700030K09RIK |
| 1700031F05RIK | 0    | 0    | 4    | 2    | 0    | 1    | 2    | 1    | 0    | 0    | 0    | 0    | 2    | 0    | 0    | 1    | 0    | 0    | 0    | 0    | 2    | 0    | 1    | 0    | 0    | 0    | 0    | 0    | 1700031F05RIK |
| 1700031L13RIK | 0    | 0    | 0    | 0    | 0    | 0    | 0    | 1    | 0    | 0    | 0    | 0    | 2    | 3    | 0    | 1    | 0    | 0    | 0    | 0    | 0    | 1    | 2    | 0    | 0    | 4    | 0    | 0    | 1700031L13RIK |
| 1700034E13RIK | 0    | 0    | 0    | 0    | 0    | 0    | 0    | 0    | 7    | 0    | 0    | 0    | 0    | 0    | 0    | 0    | 0    | 0    | 0    | 0    | 0    | 0    | 0    | 0    | 0    | 0    | 0    | 0    | 1700034E13RIK |
| 1700034I23RIK | 0    | 0    | 0    | 1    | 1    | 0    | 0    | 0    | 0    | 0    | 0    | 0    | 1    | 0    | 0    | 0    | 0    | 2    | 0    | 0    | 0    | 0    | 0    | 1    | 0    | 0    | 0    | 0    | 1700034I23RIK |
| 1700037C18RIK | 63   | 59   | 46   | 49   | 70   | 89   | 80   | 104  | 198  | 164  | 194  | 159  | 154  | 172  | 55   | 59   | 66   | 53   | 66   | 81   | 59   | 135  | 170  | 178  | 214  | 162  | 206  | 147  | 1700037C18RIK |
| 1700037H04RIK | 4339 | 5272 | 4530 | 4150 | 2963 | 2968 | 3862 | 1977 | 1973 | 1855 | 1846 | 2221 | 2487 | 2461 | 4158 | 4505 | 4460 | 3935 | 3507 | 3726 | 3744 | 1933 | 1776 | 2225 | 2157 | 2783 | 2715 | 2839 | 1700037H04RIK |
| 1700056E22RIK | 33   | 49   | 60   | 29   | 21   | 25   | 29   | 7    | 24   | 30   | 27   | 48   | 35   | 46   | 51   | 26   | 32   | 21   | 23   | 20   | 29   | 20   | 19   | 30   | 20   | 45   | 30   | 44   | 1700056E22RIK |
| 1700057G04RIK | 0    | 0    | 0    | 0    | 0    | 0    | 0    | 0    | 0    | 3    | 0    | 0    | 0    | 0    | 0    | 0    | 0    | 2    | 0    | 2    | 0    | 0    | 0    | 0    | 0    | 0    | 0    | 0    | 1700057G04RIK |
| 1700064H15RIK | 0    | 1    | 1    | 9    | 0    | 3    | 1    | 0    | 5    | 4    | 3    | 3    | 6    | 3    | 3    | 0    | 1    | 0    | 1    | 0    | 3    | 2    | 3    | 1    | 0    | 3    | 0    | 0    | 1700064H15RIK |
| 1700066B19RIK | 2    | 8    | 6    | 11   | 12   | 17   | 9    | 2    | 16   | 5    | 9    | 0    | 14   | 11   | 17   | 9    | 7    | 4    | 4    | 14   | 4    | 12   | 11   | 7    | 8    | 11   | 5    | 19   | 1700066B19RIK |
| 1700066M21RIK | 1924 | 1415 | 1365 | 1898 | 2032 | 2057 | 2567 | 1721 | 1479 | 1387 | 1362 | 1345 | 1194 | 1315 | 2018 | 1704 | 1409 | 2058 | 1843 | 2353 | 2327 | 1489 | 1595 | 1477 | 1501 | 1403 | 1167 | 1174 | 1700066M21RIK |
| 1700067K01RIK | 60   | 73   | 84   | 85   | 75   | 77   | 63   | 51   | 41   | 64   | 63   | 67   | 66   | 73   | 47   | 67   | 115  | 83   | 103  | 63   | 84   | 63   | 35   | 59   | 60   | 51   | 76   | 63   | 1700067K01RIK |
| 1700069L16RIK | 3    | 1    | 2    | 0    | 1    | 4    | 3    | 2    | 0    | 0    | 1    | 0    | 3    | 1    | 7    | 0    | 0    | 1    | 0    | 1    | 2    | 0    | 5    | 0    | 1    | 2    | 2    | 4    | 1700069L16RIK |
| 1700084M14RIK | 0    | 0    | 0    | 0    | 0    | 0    | 0    | 1    | 0    | 0    | 0    | 0    | 0    | 0    | 0    | 0    | 0    | 0    | 0    | 0    | 0    | 0    | 0    | 0    | 0    | 0    | 0    | 0    | 1700084M14RIK |
| 1700086D15RIK | 0    | 2    | 0    | 0    | 1    | 0    | 2    | 2    | 2    | 2    | 0    | 8    | 1    | 2    | 2    | 0    | 4    | 2    | 0    | 0    | 1    | 1    | 2    | 5    | 3    | 1    | 0    | 0    | 1700086D15RIK |
| 1700088E04RIK | 617  | 980  | 741  | 809  | 657  | 690  | 673  | 232  | 308  | 313  | 290  | 260  | 359  | 253  | 729  | 827  | 811  | 780  | 771  | 749  | 757  | 312  | 330  | 279  | 260  | 247  | 265  | 292  | 1700088E04RIK |
| 1700092M07RIK | 57   | 71   | 42   | 105  | 61   | 55   | 63   | 22   | 40   | 44   | 37   | 33   | 22   | 38   | 33   | 54   | 139  | 81   | 65   | 33   | 85   | 47   | 36   | 39   | 42   | 24   | 42   | 53   | 1700092M07RIK |
| 1700093K21RIK | 118  | 128  | 87   | 283  | 238  | 242  | 263  | 34   | 21   | 45   | 45   | 55   | 67   | 38   | 175  | 143  | 117  | 259  | 188  | 191  | 352  | 35   | 21   | 27   | 47   | 42   | 30   | 26   | 1700093K21RIK |
| 1700094D03RIK | 340  | 399  | 456  | 441  | 543  | 447  | 503  | 243  | 235  | 258  | 255  | 278  | 186  | 234  | 436  | 356  | 524  | 501  | 503  | 484  | 513  | 316  | 186  | 277  | 282  | 270  | 258  | 254  | 1700094D03RIK |
| 1700102P08RIK | 258  | 349  | 306  | 376  | 430  | 365  | 381  | 181  | 174  | 203  | 176  | 204  | 181  | 197  | 244  | 286  | 480  | 403  | 413  | 308  | 417  | 254  | 160  | 214  | 213  | 173  | 178  | 157  | 1700102P08RIK |
| 1700109H08RIK | 912  | 764  | 400  | 633  | 628  | 872  | 813  | 735  | 569  | 590  | 659  | 591  | 634  | 610  | 862  | 787  | 521  | 530  | 631  | 939  | 791  | 546  | 592  | 441  | 602  | 350  | 717  | 573  | 1700109H08RIK |
| 1700113H08RIK | 6    | 3    | 3    | 2    | 2    | 1    | 4    | 6    | 7    | 5    | 12   | 3    | 8    | 11   | 11   | 1    | 3    | 0    | 2    | 1    | 4    | 13   | 4    | 11   | 5    | 2    | 9    | 5    | 1700113H08RIK |
| 1700123K08RIK | 0    | 6    | 1    | 8    | 2    | 3    | 7    | 0    | 1    | 0    | 1    | 0    | 2    | 3    | 9    | 0    | 5    | 6    | 2    | 7    | 2    | 2    | 1    | 0    | 0    | 7    | 1    | 4    | 1700123K08RIK |
| 1700123O20RIK | 3012 | 2774 | 2880 | 2762 | 2294 | 2375 | 2369 | 2317 | 2137 | 2184 | 2033 | 2393 | 2266 | 2250 | 3026 | 2797 | 2773 | 2497 | 2565 | 2946 | 2420 | 1998 | 2263 | 2201 | 2316 | 2572 | 2429 | 2388 | 1700123O20RIK |
| 1700125H20RIK | 21   | 21   | 7    | 39   | 20   | 27   | 23   | 12   | 7    | 23   | 16   | 7    | 18   | 14   | 22   | 12   | 20   | 25   | 16   | 15   | 14   | 7    | 10   | 9    | 11   | 19   | 8    | 11   | 1700125H20RIK |
| 1810009A15RIK | 23   | 20   | 34   | 50   | 20   | 25   | 34   | 27   | 26   | 31   | 22   | 13   | 25   | 35   | 13   | 19   | 41   | 30   | 13   | 32   | 38   | 23   | 23   | 38   | 23   | 29   | 27   | 43   | 1810009A15RIK |
| 1810010H24RIK | 224  | 192  | 304  | 207  | 291  | 254  | 274  | 132  | 136  | 157  | 140  | 108  | 125  | 177  | 214  | 182  | 309  | 243  | 299  | 229  | 279  | 192  | 122  | 121  | 149  | 124  | 110  | 96   | 1810010H24RIK |
| 1810013L24RIK | 4834 | 4375 | 4572 | 5947 | 5659 | 5465 | 5336 | 6138 | 5258 | 5281 | 5434 | 5613 | 5719 | 5752 | 5331 | 4942 | 5062 | 5619 | 5322 | 4878 | 5398 | 6462 | 5160 | 5112 | 6047 | 4685 | 5697 | 5673 | 1810013L24RIK |
| 1810020O05RIK | 22   | 40   | 19   | 46   | 61   | 32   | 39   | 35   | 43   | 14   | 40   | 56   | 53   | 62   | 55   | 46   | 23   | 37   | 26   | 22   | 44   | 40   | 56   | 16   | 36   | 8    | 37   | 26   | 1810020O05RIK |
| 1810024B03RIK | 89   | 87   | 58   | 58   | 46   | 75   | 74   | 191  | 168  | 155  | 136  | 163  | 196  | 239  | 82   | 73   | 60   | 50   | 62   | 89   | 56   | 134  | 135  | 170  | 146  | 205  | 198  | 248  | 1810024B03RIK |
| 1810030O07RIK | 2733 | 2607 | 2602 | 2841 | 2752 | 2698 | 3051 | 3120 | 3057 | 2930 | 3068 | 3277 | 2960 | 3388 | 2681 | 2502 | 2662 | 2849 | 2939 | 2731 | 2895 | 3257 | 2958 | 3280 | 3164 | 3304 | 3083 | 3452 | 1810030O07RIK |
| 1810031717RIK | 2195 | 2493 | 3115 | 2888 | 2278 | 1895 | 2609 | 1954 | 1824 | 2476 | 2005 | 2167 | 2084 | 2842 | 2339 | 1903 | 2789 | 2299 | 2188 | 2793 | 2561 | 1587 | 1886 | 2589 | 2244 | 2659 | 2255 | 2785 | 1810031717RIK |
| 1810046K07RIK | 0    | 0    | 0    | 0    | 0    | 0    | 0    | 0    | 1    | 0    | 0    | 0    | 0    | 0    | 0    | 0    | 0    | 0    | 0    | 0    | 0    | 0    | 3    | 0    | 0    | 0    | 0    | 0    | 1810046K07RIK |
| 1810049I17RIK | 3    | 1    | 5    | 3    | 4    | 6    | 6    | 4    | 3    | 1    | 1    | 3    | 2    | 3    | 3    | 3    | 2    | 4    | 5    | 3    | 4    | 2    | 5    | 3    | 2    | 4    | 1    | 1    | 1810049I17RIK |
| 1810055G02RIK | 2676 | 3327 | 2739 | 2989 | 2257 | 2497 | 1833 | 1352 | 1590 | 1748 | 1807 | 1640 | 1635 | 1307 | 2622 | 3200 | 2971 | 2878 | 2354 | 2088 | 2011 | 1536 | 1679 | 1623 | 1618 | 1791 | 1624 | 1426 | 1810055G02RIK |
| 1810058I24RIK | 3969 | 4564 | 3953 | 3758 | 3161 | 3504 | 3461 | 2646 | 3104 | 2737 | 3415 | 3282 | 3785 | 3395 | 3955 | 4288 | 4128 | 3934 | 3500 | 3857 | 3477 | 2727 | 3342 | 3006 | 3025 | 3872 | 3655 | 3779 | 1810058I24RIK |
| 1810062G17RIK | 40   | 22   | 23   | 10   | 18   | 25   | 20   | 11   | 12   | 21   | 10   | 9    | 23   | 21   | 38   | 29   | 13   | 14   | 19   | 50   | 17   | 3    | 25   | 12   | 5    | 20   | 14   | 17   | 1810062G17RIK |
| 1810065E05RIK | 0    | 0    | 0    | 0    | 0    | 0    | 0    | 0    | 0    | 0    | 0    | 1    | 0    | 0    | 0    | 0    | 0    | 0    | 0    | 0    | 0    | 0    | 0    | 0    | 0    | 2    | 0    | 0    | 1810065E05RIK |
| 2010003K11RIK | 1    | 2    | 0    | 3    | 0    | 0    | 0    | 0    | 2    | 0    | 5    | 4    | 6    | 0    | 4    | 0    | 1    | 2    | 0    | 1    | 2    | 0    | 1    | 0    | 0    | 0    | 1    | 1    | 2010003K11RIK |
| 2010106E10RIK | 5    | 0    | 0    | 1    | 5    | 0    | 2    | 1    | 3    | 0    | 0    | 0    | 1    | 1    | 1    | 2    | 8    | 0    | 0    | 0    | 1    | 0    | 0    | 2    | 0    | 0    | 0    | 0    | 2010106E10RIK |
| 2010109A12RIK | 16   | 16   | 11   | 5    | 21   | 6    | 10   | 32   | 33   | 40   | 25   | 42   | 36   | 38   | 9    | 6    | 14   | 4    | 6    | 16   | 17   | 17   | 30   | 34   | 29   | 39   | 28   | 27   | 2010109A12RIK |
| 2010315B03RIK | 0    | 1    | 1    | 0    | 0    | 0    | 0    | 0    | 0    | 0    | 0    | 0    | 0    | 0    | 0    | 0    | 0    | 0    | 0    | 0    | 0    | 0    | 0    | 0    | 8    | 0    | 0    | 0    | 2010315B03RIK |
| 2200002D01RIK | 23   | 27   | 34   | 13   | 11   | 18   | 4    | 17   | 19   | 27   | 21   | 11   | 33   | 18   | 17   | 30   | 17   | 24   | 26   | 10   | 13   | 27   | 13   | 13   | 23   | 25   | 31   | 23   | 2200002D01RIK |
| 2200002J24RIK | 1    | 0    | 0    | 0    | 0    | 0    | 0    | 0    | 0    | 0    | 1    | 0    | 0    | 0    | 2    | 0    | 3    | 0    | 0    | 0    | 0    | 0    | 1    | 0    | 0    | 2    | 0    | 0    | 2200002J24RIK |
| 2210016F16RIK | 1336 | 1404 | 1530 | 1361 | 1396 | 1255 | 1370 | 1301 | 1241 | 1233 | 1076 | 1453 | 1353 | 1320 | 1432 | 1237 | 1570 | 1282 | 1470 | 1308 | 1449 | 1151 | 1357 | 1401 | 1221 | 1509 | 1541 | 1539 | 2210016F16RIK |
| 2210016L21RIK | 1584 | 1812 | 1816 | 1758 | 2008 | 1766 | 1894 | 2077 | 2360 | 2528 | 2454 |      |      |      |      |      |      |      |      |      |      |      |      |      |      |      |      |      |               |

|                |       |       |       |       |       |       |       |       |       |       |       |       |       |       |       |       |       |       |       |       |       |       |       |       |       |       |       |       |                |               |
|----------------|-------|-------|-------|-------|-------|-------|-------|-------|-------|-------|-------|-------|-------|-------|-------|-------|-------|-------|-------|-------|-------|-------|-------|-------|-------|-------|-------|-------|----------------|---------------|
| 2610008E11Rik  | 6243  | 5056  | 6511  | 6341  | 6827  | 6583  | 7123  | 11225 | 9010  | 9041  | 8831  | 8883  | 8552  | 9447  | 7216  | 6292  | 6435  | 6236  | 6465  | 7421  | 6585  | 10597 | 8729  | 9183  | 9872  | 8024  | 8613  | 8967  | 2610008E11Rik  |               |
| 2610021A01Rik  | 3294  | 2930  | 2893  | 3009  | 3136  | 3267  | 3357  | 3175  | 2678  | 2271  | 2166  | 2378  | 2384  | 2594  | 3473  | 3127  | 3008  | 2982  | 2996  | 3802  | 3342  | 2565  | 2530  | 2266  | 2419  | 2390  | 2587  | 2483  | 2610021A01Rik  |               |
| 2610028H24Rik  | 0     | 0     | 0     | 0     | 0     | 0     | 0     | 0     | 0     | 0     | 1     | 0     | 2     | 0     | 0     | 0     | 0     | 0     | 1     | 0     | 0     | 0     | 1     | 0     | 0     | 0     | 5     | 1     | 2610028H24Rik  |               |
| 2610042L04Rik  | 31    | 10    | 31    | 36    | 56    | 70    | 73    | 154   | 144   | 168   | 121   | 124   | 78    | 122   | 22    | 26    | 38    | 29    | 50    | 56    | 59    | 172   | 146   | 147   | 164   | 156   | 112   | 148   | 2610042L04Rik  |               |
| 2610044O15SRik | 1795  | 1364  | 2136  | 1844  | 1860  | 2003  | 1853  | 2660  | 2274  | 2074  | 2266  | 2207  | 2274  | 2433  | 1878  | 1714  | 1874  | 1788  | 1898  | 2203  | 1807  | 2359  | 2322  | 2147  | 2426  | 2489  | 2453  | 2343  | 2610044O15SRik |               |
| 2610301B20Rik  | 4291  | 3877  | 3492  | 3815  | 3913  | 3997  | 4524  | 3499  | 2731  | 2600  | 2442  | 2841  | 2835  | 2972  | 4465  | 3996  | 3837  | 3934  | 3966  | 4852  | 4357  | 3048  | 3016  | 2631  | 2623  | 2835  | 3087  | 3267  | 2610301B20Rik  |               |
| 2610318N02Rik  | 2741  | 3284  | 3304  | 2482  | 1770  | 2002  | 2211  | 1346  | 1391  | 1329  | 1204  | 2456  | 1992  | 2473  | 2421  | 2675  | 3266  | 2154  | 2302  | 2166  | 2059  | 1063  | 1096  | 2028  | 1450  | 2885  | 2697  | 2460  | 2610318N02Rik  |               |
| 2610507B11Rik  | 25301 | 25880 | 17856 | 21699 | 22193 | 22676 | 22329 | 17227 | 17988 | 16293 | 16838 | 17220 | 17580 | 16609 | 23409 | 22675 | 19019 | 21742 | 21522 | 21495 | 22919 | 15714 | 17224 | 15330 | 16997 | 12889 | 18174 | 16884 | 2610507B11Rik  |               |
| 2610528A11Rik  | 9     | 6     | 9     | 20    | 7     | 3     | 7     | 7     | 9     | 9     | 6     | 1     | 5     | 4     | 12    | 8     | 6     | 12    | 12    | 5     | 14    | 2     | 7     | 2     | 8     | 4     | 2     | 5     | 2610528A11Rik  |               |
| 2610528J11Rik  | 28    | 13    | 16    | 6     | 0     | 6     | 3     | 10    | 16    | 8     | 20    | 4     | 9     | 12    | 13    | 23    | 2     | 7     | 0     | 1     | 1     | 8     | 19    | 27    | 0     | 13    | 7     | 5     | 2610528J11Rik  |               |
| 2700049A03Rik  | 4302  | 4056  | 3462  | 3485  | 3519  | 3650  | 4082  | 3402  | 3145  | 2740  | 2631  | 3414  | 2825  | 3347  | 4371  | 4075  | 3621  | 3572  | 3472  | 4167  | 3885  | 2755  | 2961  | 2861  | 3122  | 2488  | 3106  | 2973  | 2700049A03Rik  |               |
| 2700062C07Rik  | 513   | 489   | 660   | 431   | 512   | 581   | 533   | 971   | 894   | 829   | 832   | 1032  | 865   | 1004  | 534   | 411   | 562   | 357   | 517   | 623   | 547   | 954   | 966   | 985   | 928   | 989   | 997   | 900   | 2700062C07Rik  |               |
| 2700097O09Rik  | 2903  | 2272  | 2196  | 2679  | 2274  | 2400  | 2747  | 1948  | 1694  | 1797  | 1962  | 1963  | 1776  | 2071  | 2556  | 2695  | 2437  | 2709  | 2337  | 2619  | 2723  | 1888  | 1666  | 1804  | 1938  | 1789  | 1901  | 2065  | 2700097O09Rik  |               |
| 2810004N23Rik  | 3715  | 3645  | 3687  | 3158  | 2747  | 3378  | 3372  | 3684  | 3527  | 3459  | 3435  | 3793  | 3932  | 4174  | 3695  | 3382  | 3575  | 2954  | 3025  | 3328  | 3228  | 2765  | 3603  | 3750  | 3629  | 4425  | 4345  | 4004  | 2810004N23Rik  |               |
| 2810021J22Rik  | 1722  | 1593  | 1492  | 1611  | 1582  | 1595  | 1568  | 1966  | 1664  | 1441  | 1578  | 1729  | 1692  | 1755  | 1751  | 1439  | 1607  | 1461  | 1531  | 1638  | 1490  | 1882  | 1608  | 1664  | 1847  | 1668  | 1658  | 1780  | 2810021J22Rik  |               |
| 2810408A11Rik  | 1232  | 1164  | 1237  | 1101  | 1055  | 1149  | 1181  | 1031  | 1130  | 1239  | 1111  | 1638  | 1423  | 1755  | 1093  | 943   | 1263  | 1016  | 1210  | 1126  | 1118  | 1026  | 989   | 1575  | 1354  | 1875  | 1628  | 1676  | 2810408A11Rik  |               |
| 2810459M11Rik  | 45    | 51    | 48    | 79    | 266   | 212   | 181   | 172   | 274   | 263   | 198   | 49    | 50    | 74    | 46    | 37    | 29    | 120   | 214   | 128   | 210   | 196   | 339   | 217   | 370   | 61    | 21    | 26    | 2810459M11Rik  |               |
| 2900026A02Rik  | 3537  | 4374  | 4330  | 5546  | 4241  | 4103  | 4181  | 2900  | 2662  | 2280  | 2377  | 2410  | 2321  | 2006  | 2260  | 3465  | 4000  | 4923  | 5410  | 4630  | 3432  | 4398  | 1878  | 2324  | 2708  | 2198  | 2182  | 1807  | 1991           | 2900026A02Rik |
| 2900092C05Rik  | 0     | 1     | 0     | 0     | 0     | 0     | 0     | 0     | 0     | 0     | 0     | 0     | 2     | 0     | 0     | 9     | 2     | 1     | 0     | 4     | 0     | 0     | 2     | 0     | 1     | 0     | 0     | 1     | 2900092C05Rik  |               |
| 3110001I22Rik  | 356   | 416   | 363   | 369   | 314   | 408   | 371   | 541   | 412   | 366   | 328   | 400   | 429   | 420   | 409   | 396   | 377   | 281   | 308   | 443   | 340   | 434   | 370   | 337   | 426   | 355   | 460   | 409   | 3110001I22Rik  |               |
| 3110009E18Rik  | 104   | 94    | 81    | 81    | 90    | 48    | 133   | 156   | 129   | 133   | 125   | 153   | 128   | 204   | 96    | 65    | 90    | 46    | 96    | 113   | 93    | 147   | 136   | 181   | 160   | 221   | 172   | 199   | 3110009E18Rik  |               |
| 3110021N24Rik  | 16    | 10    | 11    | 7     | 13    | 9     | 20    | 33    | 16    | 23    | 24    | 9     | 18    | 29    | 24    | 16    | 13    | 11    | 19    | 20    | 25    | 13    | 18    | 15    | 9     | 20    | 24    | 11    | 3110021N24Rik  |               |
| 3110040M04Rik  | 0     | 0     | 0     | 1     | 0     | 0     | 0     | 0     | 1     | 0     | 0     | 0     | 5     | 0     | 0     | 0     | 0     | 0     | 0     | 0     | 0     | 0     | 0     | 0     | 0     | 0     | 0     | 0     | 3110040M04Rik  |               |
| 3110040N11Rik  | 415   | 498   | 601   | 417   | 425   | 497   | 453   | 894   | 886   | 870   | 937   | 860   | 933   | 877   | 452   | 457   | 477   | 395   | 508   | 518   | 470   | 722   | 878   | 962   | 879   | 957   | 1001  | 834   | 3110040N11Rik  |               |
| 3110082I7Rik   | 1310  | 1749  | 2078  | 1444  | 1059  | 1153  | 1079  | 675   | 789   | 845   | 862   | 1059  | 990   | 1032  | 1288  | 1490  | 1661  | 1224  | 1272  | 1346  | 1087  | 633   | 845   | 1072  | 931   | 1486  | 1098  | 1092  | 3110082I7Rik   |               |
| 3110082J24Rik  | 53    | 54    | 82    | 71    | 87    | 88    | 101   | 209   | 123   | 160   | 180   | 223   | 218   | 275   | 87    | 44    | 102   | 89    | 96    | 76    | 75    | 206   | 133   | 193   | 185   | 223   | 189   | 288   | 3110082J24Rik  |               |
| 3300002I08Rik  | 258   | 263   | 147   | 132   | 225   | 275   | 228   | 355   | 339   | 216   | 274   | 226   | 266   | 263   | 239   | 217   | 162   | 164   | 203   | 356   | 239   | 172   | 293   | 171   | 291   | 99    | 237   | 217   | 3300002I08Rik  |               |
| 3425401B19Rik  | 3     | 2     | 2     | 2     | 7     | 9     | 0     | 9     | 34    | 5     | 186   | 1     | 7     | 0     | 3     | 4     | 0     | 0     | 2     | 0     | 2     | 13    | 92    | 7     | 0     | 2     | 0     | 1     | 3425401B19Rik  |               |
| 3830403N18Rik  | 53    | 22    | 24    | 59    | 16    | 36    | 18    | 18    | 22    | 41    | 31    | 12    | 45    | 21    | 12    | 40    | 15    | 20    | 11    | 15    | 14    | 52    | 57    | 7     | 23    | 18    | 38    | 37    | 3830403N18Rik  |               |
| 3830406C13Rik  | 739   | 504   | 548   | 684   | 704   | 771   | 963   | 1131  | 1028  | 893   | 780   | 834   | 814   | 861   | 764   | 604   | 611   | 661   | 648   | 872   | 816   | 991   | 1045  | 927   | 843   | 991   | 826   | 879   | 3830406C13Rik  |               |
| 4833420G17Rik  | 9691  | 8910  | 8182  | 9624  | 10082 | 10537 | 11508 | 10169 | 8981  | 9651  | 8641  | 9544  | 9183  | 10312 | 10059 | 8539  | 9042  | 9355  | 9841  | 5219  | 11076 | 10134 | 8334  | 9081  | 10221 | 8612  | 9541  | 9566  | 4833420G17Rik  |               |
| 4833439L19Rik  | 9939  | 10312 | 10126 | 10596 | 10153 | 9994  | 11048 | 8970  | 8880  | 9502  | 8864  | 11061 | 9331  | 11375 | 9849  | 9761  | 10549 | 10445 | 10833 | 9414  | 10871 | 10592 | 8121  | 10493 | 10723 | 10919 | 10163 | 11363 | 4833439L19Rik  |               |
| 4921504E06Rik  | 0     | 6     | 0     | 1     | 7     | 4     | 0     | 16    | 9     | 3     | 2     | 0     | 4     | 1     | 9     | 22    | 0     | 0     | 0     | 5     | 0     | 7     | 6     | 1     | 8     | 0     | 0     | 0     | 4921504E06Rik  |               |
| 4921507P07Rik  | 219   | 191   | 187   | 251   | 348   | 307   | 232   | 183   | 185   | 199   | 132   | 165   | 206   | 177   | 262   | 227   | 245   | 250   | 280   | 276   | 248   | 227   | 200   | 141   | 210   | 138   | 171   | 170   | 4921507P07Rik  |               |
| 4921509C19Rik  | 1     | 0     | 0     | 0     | 0     | 0     | 0     | 0     | 0     | 0     | 0     | 0     | 0     | 0     | 0     | 0     | 0     | 0     | 0     | 0     | 0     | 0     | 0     | 0     | 0     | 0     | 0     | 0     | 4921509C19Rik  |               |
| 4921517D22Rik  | 0     | 1     | 0     | 1     | 0     | 1     | 0     | 0     | 0     | 0     | 0     | 0     | 0     | 1     | 0     | 1     | 0     | 4     | 0     | 0     | 1     | 0     | 0     | 0     | 0     | 0     | 0     | 0     | 4921517D22Rik  |               |
| 4921524I17Rik  | 2014  | 1871  | 1835  | 2150  | 2041  | 1877  | 2368  | 1481  | 1152  | 1003  | 1119  | 1157  | 1141  | 1309  | 2385  | 2101  | 1684  | 2088  | 1916  | 2452  | 2150  | 1258  | 1265  | 1264  | 1235  | 1343  | 1126  | 1280  | 4921524I17Rik  |               |
| 4921524L21Rik  | 0     | 0     | 0     | 0     | 0     | 0     | 0     | 0     | 0     | 0     | 0     | 0     | 0     | 0     | 0     | 0     | 0     | 0     | 0     | 0     | 0     | 0     | 0     | 0     | 0     | 0     | 0     | 0     | 4921524L21Rik  |               |
| 4921536K21Rik  | 213   | 288   | 261   | 271   | 247   | 223   | 292   | 154   | 147   | 172   | 105   | 226   | 196   | 202   | 193   | 228   | 257   | 248   | 235   | 211   | 248   | 144   | 117   | 192   | 169   | 215   | 196   | 229   | 4921536K21Rik  |               |
| 4921539E11Rik  | 0     | 0     | 0     | 0     | 0     | 0     | 0     | 0     | 0     | 0     | 0     | 0     | 0     | 0     | 0     | 0     | 0     | 0     | 1     | 0     | 0     | 0     | 0     | 0     | 0     | 0     | 0     | 0     | 4921539E11Rik  |               |
| 4930402F06Rik  | 0     | 3     | 3     | 0     | 2     | 0     | 0     | 0     | 0     | 0     | 0     | 0     | 0     | 0     | 0     | 0     | 0     | 0     | 0     | 0     | 0     | 0     | 0     | 0     | 0     | 0     | 0     | 0     | 4930402F06Rik  |               |
| 4930404H24Rik  | 0     | 0     | 0     | 0     | 0     | 0     | 3     | 0     | 0     | 0     | 0     | 1     | 0     | 0     | 1     | 0     | 1     | 0     | 1     | 0     | 1     | 2     | 2     | 2     | 0     | 0     | 0     | 0     | 4930404H24Rik  |               |
| 4930404N11Rik  | 17    | 15    | 21    | 15    | 9     | 21    | 8     | 2     | 6     | 6     | 6     | 2     | 6     | 5     | 7     | 12    | 21    | 15    | 12    | 15    | 11    | 12    | 4     | 7     | 12    | 11    | 7     | 14    | 4930404N11Rik  |               |
| 4930407I10Rik  | 2     | 2     | 2     | 9     | 1     | 0     | 1     | 1     | 4     | 1     | 1     | 9     | 7     | 1     | 5     | 5     | 0     | 0     | 0     | 2     | 0     | 3     | 2     | 3     | 1     | 4     | 0     | 0     | 4930407I10Rik  |               |
| 4930412O13Rik  | 130   | 145   | 197   | 182   | 148   | 177   | 102   | 147   | 109   | 133   | 122   | 138   | 231   | 165   | 119   | 168   | 185   | 154   | 182   | 106   | 172   | 164   | 122   | 162   | 142   | 50    | 201   | 126   | 4930412O13Rik  |               |
| 4930430F08Rik  | 1649  | 1494  | 1634  | 1627  | 1413  | 1549  | 1666  | 1261  | 980   | 906   | 925   | 951   | 1015  | 1022  | 1999  | 1665  | 1608  | 1487  | 1522  | 1781  | 1709  | 999   | 1038  | 934   | 1016  | 1047  | 951   | 1187  | 4930430F08Rik  |               |
| 4930432M17Rik  | 0     | 0     | 0     | 0     | 0     | 0     | 0     | 0     | 0     | 0     | 0     | 0     | 0     | 0     | 0     | 0     | 1     | 0     | 0     | 0     | 0     | 0     | 0     | 0     | 0     | 0     | 0     | 0     | 4930432M17Rik  |               |
| 4930438A08Rik  | 2     | 7     | 6     | 2     | 3     | 0     | 6     | 0     | 7     | 4     | 5     | 4     | 1     | 1     | 13    | 7     | 6     | 2     | 5     | 8     | 4     | 0     | 1     | 5     | 2     | 4     | 3     | 2     | 4930438A08Rik  |               |
| 4930444P10Rik  | 47    | 51    | 44    | 62    | 65    | 61    | 75    | 132   | 133   | 178   | 130   | 119   | 127   | 153   | 40    | 37    | 52    | 67    | 60    | 74    | 78    | 169   | 148   | 116   | 164   | 93    | 141   |       |                |               |

|               |       |       |       |       |       |       |       |       |       |       |       |       |       |       |       |       |       |       |       |       |       |       |       |       |       |       |       |               |               |
|---------------|-------|-------|-------|-------|-------|-------|-------|-------|-------|-------|-------|-------|-------|-------|-------|-------|-------|-------|-------|-------|-------|-------|-------|-------|-------|-------|-------|---------------|---------------|
| 4930579F01R1K | 5     | 3     | 0     | 2     | 0     | 0     | 0     | 4     | 4     | 8     | 5     | 3     | 3     | 0     | 1     | 2     | 0     | 1     | 1     | 3     | 0     | 0     | 5     | 10    | 0     | 2     | 0     | 1             | 4930579F01R1K |
| 4930579G24R1K | 1257  | 956   | 1068  | 959   | 648   | 714   | 701   | 510   | 492   | 431   | 520   | 507   | 568   | 528   | 1068  | 1164  | 972   | 873   | 678   | 779   | 710   | 386   | 507   | 506   | 368   | 632   | 581   | 597           | 4930579G24R1K |
| 4930583I09R1K | 0     | 1     | 5     | 0     | 0     | 0     | 0     | 0     | 0     | 0     | 0     | 0     | 0     | 0     | 0     | 2     | 0     | 0     | 0     | 0     | 0     | 0     | 0     | 0     | 0     | 0     | 0     | 0             | 4930583I09R1K |
| 4930590J08R1K | 499   | 526   | 282   | 442   | 548   | 539   | 561   | 368   | 289   | 343   | 275   | 321   | 339   | 286   | 562   | 479   | 393   | 555   | 494   | 562   | 527   | 416   | 244   | 261   | 340   | 222   | 343   | 274           | 4930590J08R1K |
| 4930595D18R1K | 2     | 3     | 0     | 0     | 9     | 6     | 6     | 5     | 9     | 9     | 8     | 5     | 3     | 13    | 4     | 2     | 0     | 7     | 9     | 8     | 3     | 8     | 8     | 7     | 9     | 12    | 12    | 4             | 4930595D18R1K |
| 4930595M18R1K | 0     | 0     | 0     | 0     | 0     | 0     | 1     | 0     | 0     | 0     | 0     | 0     | 0     | 0     | 0     | 0     | 0     | 0     | 0     | 0     | 0     | 0     | 0     | 0     | 0     | 0     | 0     | 0             | 4930595M18R1K |
| 4931406B18R1K | 0     | 0     | 0     | 0     | 0     | 0     | 0     | 0     | 0     | 3     | 1     | 1     | 0     | 0     | 0     | 0     | 0     | 2     | 0     | 0     | 0     | 0     | 3     | 2     | 0     | 1     | 0     | 0             | 4931406B18R1K |
| 4931406C07R1K | 2226  | 2101  | 2245  | 2181  | 2016  | 2312  | 2204  | 3070  | 2740  | 2746  | 2943  | 2603  | 2662  | 2855  | 2552  | 2083  | 2080  | 2167  | 1978  | 2303  | 2218  | 2892  | 2928  | 2545  | 2624  | 2566  | 2571  | 2667          | 4931406C07R1K |
| 4931408C20R1K | 0     | 0     | 0     | 0     | 0     | 0     | 0     | 0     | 0     | 0     | 0     | 0     | 0     | 0     | 0     | 0     | 0     | 2     | 0     | 0     | 0     | 0     | 1     | 0     | 0     | 0     | 0     | 0             | 4931408C20R1K |
| 4931414P19R1K | 836   | 1001  | 1094  | 1009  | 860   | 772   | 932   | 702   | 817   | 925   | 810   | 923   | 792   | 852   | 857   | 814   | 1132  | 873   | 1039  | 889   | 904   | 742   | 761   | 1102  | 901   | 986   | 870   | 875           | 4931414P19R1K |
| 4931422A03R1K | 6     | 2     | 11    | 5     | 2     | 2     | 3     | 0     | 2     | 3     | 0     | 2     | 1     | 2     | 1     | 0     | 3     | 2     | 5     | 3     | 2     | 3     | 3     | 2     | 2     | 5     | 7     | 2             | 4931422A03R1K |
| 4931428F04R1K | 6664  | 8587  | 8274  | 10986 | 13070 | 10823 | 11255 | 7880  | 8971  | 10951 | 9455  | 9601  | 8800  | 9691  | 7543  | 7567  | 10164 | 11537 | 12123 | 9640  | 11879 | 12509 | 8066  | 10416 | 12589 | 7992  | 8807  | 8822          | 4931428F04R1K |
| 4931428L18R1K | 0     | 0     | 0     | 0     | 0     | 0     | 0     | 0     | 0     | 0     | 0     | 0     | 0     | 0     | 0     | 0     | 0     | 0     | 0     | 0     | 0     | 0     | 2     | 0     | 0     | 0     | 0     | 0             | 4931428L18R1K |
| 4931429L15R1K | 6     | 6     | 6     | 6     | 10    | 2     | 7     | 7     | 6     | 3     | 2     | 8     | 12    | 7     | 8     | 6     | 6     | 2     | 4     | 8     | 3     | 5     | 6     | 10    | 5     | 8     | 2     | 6             | 4931429L15R1K |
| 4932414N04R1K | 0     | 0     | 0     | 0     | 0     | 1     | 0     | 0     | 2     | 0     | 0     | 0     | 0     | 0     | 0     | 5     | 0     | 0     | 0     | 0     | 0     | 0     | 0     | 0     | 0     | 0     | 0     | 0             | 4932414N04R1K |
| 4932415D10R1K | 0     | 0     | 0     | 3     | 0     | 4     | 2     | 5     | 3     | 2     | 2     | 1     | 7     | 3     | 4     | 3     | 2     | 0     | 0     | 0     | 0     | 2     | 0     | 3     | 0     | 1     | 0     | 0             | 4932415D10R1K |
| 4932429P05R1K | 0     | 0     | 0     | 0     | 0     | 0     | 0     | 0     | 0     | 0     | 0     | 1     | 0     | 0     | 0     | 0     | 0     | 0     | 0     | 0     | 0     | 0     | 0     | 0     | 0     | 0     | 0     | 0             | 4932429P05R1K |
| 4932438A13R1K | 19144 | 16218 | 6762  | 9590  | 10934 | 14644 | 13370 | 15344 | 14505 | 7911  | 9022  | 6863  | 7655  | 7313  | 19317 | 17879 | 7398  | 10162 | 9143  | 18521 | 14974 | 8241  | 13271 | 5887  | 8427  | 4150  | 8400  | 6246          | 4932438A13R1K |
| 4932438H23R1K | 29    | 26    | 30    | 24    | 45    | 16    | 15    | 38    | 50    | 49    | 27    | 40    | 44    | 19    | 30    | 36    | 23    | 22    | 33    | 42    | 30    | 27    | 58    | 27    | 23    | 31    | 26    | 25            | 4932438H23R1K |
| 4933400A11R1K | 0     | 0     | 0     | 0     | 0     | 0     | 0     | 1     | 0     | 0     | 0     | 0     | 0     | 0     | 0     | 0     | 0     | 0     | 0     | 0     | 0     | 0     | 0     | 0     | 0     | 0     | 0     | 0             | 4933400A11R1K |
| 4933402D24R1K | 1     | 4     | 6     | 4     | 8     | 4     | 4     | 7     | 9     | 5     | 0     | 1     | 1     | 0     | 7     | 2     | 10    | 4     | 9     | 1     | 3     | 10    | 3     | 1     | 8     | 8     | 8     | 2             | 4933402D24R1K |
| 4933402J07R1K | 17    | 18    | 4     | 23    | 20    | 14    | 22    | 0     | 0     | 1     | 4     | 2     | 1     | 2     | 17    | 12    | 6     | 36    | 12    | 18    | 22    | 0     | 3     | 0     | 0     | 4     | 2     | 2             | 4933402J07R1K |
| 4933402N22R1K | 0     | 0     | 0     | 0     | 0     | 0     | 0     | 0     | 0     | 0     | 2     | 0     | 0     | 0     | 0     | 0     | 0     | 0     | 0     | 0     | 0     | 0     | 0     | 0     | 0     | 0     | 0     | 0             | 4933402N22R1K |
| 4933403O08R1K | 97    | 71    | 9     | 41    | 69    | 66    | 67    | 62    | 44    | 21    | 28    | 39    | 15    | 35    | 76    | 58    | 22    | 32    | 37    | 79    | 60    | 23    | 35    | 20    | 45    | 2     | 55    | 33            | 4933403O08R1K |
| 4933405L10R1K | 0     | 4     | 2     | 5     | 4     | 13    | 0     | 4     | 2     | 3     | 1     | 8     | 7     | 1     | 1     | 1     | 1     | 4     | 9     | 5     | 4     | 2     | 5     | 8     | 5     | 11    | 2     | 2             | 4933405L10R1K |
| 4933405O20R1K | 0     | 0     | 0     | 0     | 2     | 0     | 0     | 4     | 0     | 0     | 0     | 0     | 0     | 0     | 3     | 0     | 2     | 0     | 0     | 0     | 0     | 5     | 0     | 0     | 0     | 0     | 0     | 0             | 4933405O20R1K |
| 4933407L21R1K | 72    | 86    | 61    | 109   | 132   | 123   | 177   | 184   | 198   | 203   | 177   | 212   | 161   | 185   | 88    | 55    | 82    | 86    | 170   | 170   | 183   | 212   | 194   | 251   | 225   | 203   | 164   | 190           | 4933407L21R1K |
| 4933409G03R1K | 0     | 0     | 0     | 0     | 0     | 0     | 0     | 1     | 0     | 2     | 5     | 0     | 0     | 0     | 1     | 0     | 0     | 0     | 0     | 0     | 0     | 3     | 1     | 0     | 0     | 0     | 0     | 0             | 4933409G03R1K |
| 4933411K16R1K | 14    | 17    | 6     | 8     | 6     | 18    | 13    | 6     | 16    | 12    | 21    | 8     | 19    | 5     | 15    | 23    | 6     | 10    | 2     | 6     | 8     | 15    | 14    | 3     | 3     | 0     | 3     | 5             | 4933411K16R1K |
| 4933412E24R1K | 0     | 0     | 0     | 0     | 0     | 0     | 0     | 0     | 0     | 0     | 0     | 0     | 0     | 0     | 0     | 0     | 0     | 0     | 0     | 0     | 0     | 0     | 0     | 0     | 0     | 0     | 0     | 0             | 4933412E24R1K |
| 4933414I15R1K | 0     | 0     | 0     | 0     | 0     | 0     | 0     | 0     | 1     | 0     | 0     | 0     | 0     | 0     | 0     | 0     | 0     | 0     | 0     | 0     | 0     | 0     | 0     | 0     | 0     | 2     | 0     | 0             | 4933414I15R1K |
| 4933417A18R1K | 0     | 0     | 0     | 0     | 0     | 0     | 1     | 0     | 0     | 0     | 1     | 0     | 0     | 0     | 0     | 0     | 0     | 0     | 0     | 0     | 0     | 0     | 1     | 0     | 0     | 0     | 0     | 0             | 4933417A18R1K |
| 4933421I07R1K | 0     | 0     | 0     | 5     | 0     | 2     | 0     | 0     | 0     | 0     | 1     | 0     | 0     | 0     | 1     | 0     | 0     | 0     | 0     | 0     | 0     | 0     | 0     | 0     | 0     | 1     | 0     | 0             | 4933421I07R1K |
| 4933424G06R1K | 6     | 8     | 0     | 4     | 2     | 2     | 8     | 17    | 16    | 10    | 9     | 27    | 5     | 9     | 5     | 3     | 5     | 1     | 2     | 7     | 7     | 18    | 10    | 13    | 9     | 16    | 5     | 9             | 4933424G06R1K |
| 4933427D14R1K | 8     | 10    | 2     | 6     | 13    | 12    | 13    | 21    | 7     | 8     | 13    | 16    | 12    | 15    | 12    | 8     | 6     | 3     | 5     | 17    | 13    | 7     | 15    | 10    | 13    | 4     | 14    | 19            | 4933427D14R1K |
| 4933428G20R1K | 25    | 16    | 23    | 39    | 21    | 36    | 49    | 2     | 11    | 9     | 22    | 9     | 6     | 10    | 18    | 16    | 24    | 51    | 37    | 35    | 42    | 8     | 8     | 5     | 12    | 11    | 7     | 11            | 4933428G20R1K |
| 4933430I17R1K | 325   | 241   | 228   | 223   | 259   | 232   | 259   | 147   | 149   | 168   | 142   | 237   | 219   | 223   | 316   | 224   | 242   | 224   | 236   | 304   | 232   | 182   | 144   | 188   | 232   | 189   | 285   | 236           | 4933430I17R1K |
| 4933434E20R1K | 945   | 788   | 743   | 836   | 867   | 845   | 1079  | 1258  | 871   | 909   | 843   | 1054  | 886   | 1229  | 903   | 722   | 866   | 844   | 910   | 932   | 1184  | 1101  | 830   | 1070  | 1026  | 968   | 949   | 1195          | 4933434E20R1K |
| 5031439G07R1K | 19305 | 21054 | 21182 | 24009 | 22863 | 21756 | 21566 | 10893 | 11576 | 13424 | 12898 | 11961 | 11677 | 11414 | 18923 | 20586 | 23063 | 25281 | 24277 | 17625 | 22858 | 15241 | 11296 | 12593 | 14446 | 9776  | 11460 | 11317         | 5031439G07R1K |
| 5430403G16R1K | 298   | 224   | 297   | 332   | 328   | 289   | 355   | 192   | 208   | 254   | 215   | 211   | 234   | 202   | 355   | 283   | 316   | 252   | 292   | 364   | 312   | 194   | 226   | 179   | 146   | 169   | 185   | 203           | 5430403G16R1K |
| 5530401A14R1K | 3     | 4     | 0     | 0     | 1     | 3     | 0     | 5     | 3     | 2     | 5     | 4     | 11    | 2     | 4     | 3     | 1     | 0     | 0     | 0     | 1     | 0     | 6     | 7     | 2     | 5     | 2     | 4             | 5530401A14R1K |
| 5730409E04R1K | 210   | 253   | 226   | 289   | 727   | 586   | 351   | 1044  | 1302  | 1265  | 1447  | 787   | 921   | 860   | 347   | 298   | 350   | 457   | 408   | 419   | 422   | 1399  | 1337  | 1055  | 1096  | 931   | 895   | 809           | 5730409E04R1K |
| 5730455P16R1K | 2986  | 2394  | 2926  | 2592  | 2814  | 2918  | 2841  | 3861  | 3571  | 3582  | 3583  | 3973  | 3814  | 4316  | 3054  | 2442  | 2605  | 2535  | 2656  | 2824  | 2623  | 3686  | 3359  | 3460  | 3935  | 3855  | 4073  | 4190          | 5730455P16R1K |
| 5730480H06R1K | 1307  | 1099  | 1122  | 1004  | 929   | 904   | 1134  | 1340  | 1182  | 1148  | 1137  | 1232  | 1221  | 1395  | 1325  | 1210  | 1092  | 1002  | 913   | 1190  | 1077  | 1081  | 1224  | 1168  | 1215  | 1351  | 1391  | 1533          | 5730480H06R1K |
| 5730507C01R1K | 68    | 48    | 151   | 53    | 83    | 53    | 36    | 54    | 95    | 85    | 58    | 53    | 120   | 77    | 91    | 118   | 87    | 51    | 72    | 76    | 56    | 114   | 121   | 69    | 73    | 105   | 103   | 141           | 5730507C01R1K |
| 5730522E02R1K | 248   | 157   | 96    | 170   | 239   | 235   | 325   | 302   | 307   | 245   | 259   | 234   | 170   | 318   | 206   | 140   | 162   | 217   | 216   | 320   | 311   | 353   | 282   | 274   | 307   | 269   | 230   | 214           | 5730522E02R1K |
| 6030458C11R1K | 3157  | 2981  | 2908  | 3043  | 2897  | 2963  | 3018  | 3776  | 3745  | 3664  | 4077  | 4051  | 4024  | 3984  | 3299  | 3062  | 3038  | 3035  | 2950  | 3081  | 2918  | 3613  | 3737  | 3755  | 3724  | 3397  | 4026  | 3796          | 6030458C11R1K |
| 6030468B19R1K | 2     | 4     | 14    | 2     | 2     | 1     | 1     | 4     | 3     | 9     | 8     | 18    | 0     | 4     | 7     | 3     | 1     | 2     | 2     | 1     | 7     | 3     | 2     | 2     | 6     | 0     | 31    | 6030468B19R1K |               |
| 6030498E09R1K | 1     | 0     | 7     | 3     | 4     | 0     | 2     | 4     | 5     | 3     | 10    | 4     | 3     | 3     | 1     | 2     | 2     | 1     | 0     | 3     | 1     | 3     | 3     | 2     | 1     | 1     | 0     | 5             | 6030498E09R1K |
| 6330403K07R1K | 9054  | 10612 | 9745  | 10964 | 13042 | 12339 | 12081 | 17027 | 15021 | 15826 | 14860 | 15459 | 15618 | 16153 | 10362 | 8565  | 10855 | 10871 | 13339 | 13169 | 12545 | 16404 | 14914 | 16444 | 17285 | 14974 | 16467 | 16014         | 6330403K07R1K |
| 6330409D20R1K | 179   | 231   | 167   | 251   | 209   | 209   | 173   | 110   | 98    | 152   | 112   | 165   | 118   | 123   | 202   | 160   | 251   | 253   | 254   | 193   | 201   | 144   | 119   | 152   | 147   | 166   | 180   | 150           | 6330409D20R1K |
| 6330411D24R1K | 1     | 0     | 0     | 6     | 0     | 3     | 0     | 1     | 1     | 0     | 0     | 0     | 0     | 0     | 1     | 1     | 0     | 0     | 0     | 1     | 0     | 2     | 5     | 0     | 2     | 0     | 1     | 0             | 63            |





|        |       |       |       |       |       |       |       |       |       |       |       |       |       |       |       |       |       |       |       |       |       |        |       |       |       |       |       |       |        |
|--------|-------|-------|-------|-------|-------|-------|-------|-------|-------|-------|-------|-------|-------|-------|-------|-------|-------|-------|-------|-------|-------|--------|-------|-------|-------|-------|-------|-------|--------|
| Abca13 | 50    | 39    | 5     | 22    | 8     | 22    | 23    | 49    | 61    | 41    | 35    | 23    | 25    | 18    | 40    | 58    | 8     | 9     | 12    | 17    | 13    | 8      | 52    | 41    | 19    | 17    | 13    | 15    | Abca13 |
| Abca14 | 0     | 0     | 0     | 4     | 0     | 0     | 0     | 0     | 2     | 3     | 3     | 0     | 0     | 0     | 3     | 1     | 0     | 4     | 0     | 0     | 0     | 3      | 0     | 0     | 5     | 3     | 1     | 0     | Abca14 |
| Abca15 | 0     | 0     | 0     | 2     | 0     | 0     | 2     | 2     | 2     | 0     | 0     | 0     | 0     | 0     | 0     | 1     | 0     | 0     | 2     | 4     | 0     | 0      | 0     | 0     | 0     | 0     | 0     | 0     | Abca15 |
| Abca16 | 0     | 3     | 0     | 0     | 0     | 0     | 0     | 0     | 2     | 3     | 1     | 0     | 0     | 0     | 0     | 5     | 0     | 0     | 0     | 0     | 0     | 3      | 2     | 1     | 1     | 1     | 0     | 0     | Abca16 |
| Abca17 | 21    | 20    | 27    | 38    | 71    | 31    | 30    | 31    | 40    | 38    | 61    | 8     | 28    | 17    | 18    | 36    | 24    | 24    | 42    | 33    | 55    | 33     | 32    | 23    | 29    | 25    | 12    | 25    | Abca17 |
| Abca2  | 2228  | 2956  | 2773  | 4069  | 4996  | 4295  | 3996  | 3852  | 5116  | 5442  | 4631  | 5409  | 4510  | 4494  | 2313  | 2482  | 3344  | 4260  | 5051  | 3783  | 4378  | 6191   | 4442  | 5213  | 6148  | 3217  | 4530  | 4273  | Abca2  |
| Abca3  | 5737  | 6639  | 6250  | 8079  | 9516  | 8101  | 8189  | 5072  | 5532  | 6441  | 5856  | 5806  | 5635  | 5461  | 6125  | 6368  | 7414  | 8408  | 9037  | 7365  | 8660  | 7222   | 5323  | 5821  | 7027  | 3853  | 5327  | 5169  | Abca3  |
| Abca4  | 352   | 349   | 202   | 182   | 352   | 274   | 192   | 412   | 5076  | 368   | 415   | 471   | 564   | 325   | 287   | 433   | 189   | 223   | 235   | 288   | 213   | 510    | 693   | 223   | 276   | 274   | 446   | 332   | Abca4  |
| Abca5  | 5580  | 4043  | 3135  | 4100  | 4030  | 4643  | 4419  | 2551  | 2476  | 2088  | 2527  | 1685  | 1809  | 1657  | 5458  | 5230  | 3279  | 4459  | 3675  | 5191  | 4293  | 2067   | 2769  | 1530  | 1909  | 1102  | 1641  | 1510  | Abca5  |
| Abca6  | 196   | 83    | 38    | 60    | 74    | 84    | 56    | 110   | 146   | 78    | 130   | 31    | 57    | 37    | 76    | 113   | 50    | 120   | 49    | 98    | 81    | 70     | 239   | 72    | 77    | 12    | 71    | 40    | Abca6  |
| Abca7  | 4140  | 6116  | 6580  | 7409  | 6827  | 6051  | 6092  | 2026  | 2150  | 2796  | 2351  | 2622  | 2477  | 2259  | 4387  | 5341  | 7539  | 7500  | 7790  | 5765  | 6142  | 2923   | 2181  | 2699  | 2586  | 1749  | 2597  | 2531  | Abca7  |
| Abca8a | 31    | 27    | 8     | 39    | 120   | 82    | 110   | 106   | 192   | 107   | 678   | 30    | 61    | 42    | 37    | 32    | 10    | 91    | 63    | 72    | 129   | 129    | 616   | 44    | 90    | 24    | 36    | 31    | Abca8a |
| Abca8b | 1001  | 855   | 533   | 794   | 1159  | 1090  | 1153  | 884   | 1023  | 862   | 1259  | 588   | 727   | 612   | 973   | 927   | 637   | 923   | 856   | 1204  | 1037  | 1008   | 1220  | 637   | 817   | 380   | 530   | 469   | Abca8b |
| Abca9  | 1318  | 1267  | 1105  | 1053  | 1189  | 1552  | 977   | 1859  | 2226  | 1986  | 3296  | 1952  | 2487  | 1938  | 1447  | 1456  | 955   | 1401  | 848   | 1376  | 1087  | 2074   | 3736  | 1927  | 2053  | 1089  | 2086  | 1709  | Abca9  |
| Abcb10 | 2060  | 2169  | 2224  | 1946  | 2060  | 1951  | 1707  | 2296  | 2360  | 2249  | 2371  | 2600  | 3083  | 2489  | 2151  | 2233  | 1954  | 1767  | 1926  | 1782  | 1631  | 2410   | 2348  | 2268  | 2364  | 2561  | 2751  | 3190  | Abcb10 |
| Abcb11 | 0     | 0     | 13    | 2     | 9     | 9     | 6     | 6     | 5     | 3     | 4     | 5     | 9     | 3     | 1     | 3     | 0     | 3     | 5     | 3     | 2     | 5      | 1     | 1     | 11    | 4     | 1     | 2     | Abcb11 |
| Abcb1a | 211   | 196   | 272   | 284   | 416   | 328   | 335   | 369   | 302   | 410   | 357   | 382   | 364   | 380   | 269   | 221   | 250   | 338   | 391   | 392   | 374   | 431    | 403   | 336   | 483   | 295   | 320   | 345   | Abcb1a |
| Abcb1b | 146   | 106   | 153   | 80    | 79    | 113   | 98    | 85    | 110   | 86    | 121   | 77    | 74    | 69    | 167   | 164   | 93    | 94    | 110   | 115   | 90    | 60     | 117   | 59    | 60    | 63    | 92    | 80    | Abcb1b |
| Abcb4  | 102   | 105   | 76    | 93    | 94    | 140   | 132   | 82    | 74    | 66    | 55    | 99    | 71    | 85    | 84    | 75    | 123   | 76    | 147   | 195   | 144   | 60     | 63    | 57    | 86    | 106   | 91    | 81    | Abcb4  |
| Abcb5  | 0     | 0     | 1     | 2     | 0     | 0     | 0     | 2     | 0     | 0     | 0     | 3     | 0     | 0     | 1     | 0     | 0     | 0     | 0     | 0     | 0     | 0      | 0     | 3     | 0     | 1     | 0     | 1     | Abcb5  |
| Abcb6  | 191   | 147   | 139   | 155   | 177   | 87    | 227   | 96    | 70    | 148   | 100   | 110   | 99    | 116   | 156   | 93    | 172   | 142   | 154   | 129   | 172   | 135    | 73    | 145   | 89    | 117   | 115   | 76    | Abcb6  |
| Abcb7  | 3840  | 2953  | 3252  | 3202  | 3533  | 3728  | 4119  | 6298  | 4578  | 4175  | 4548  | 5470  | 4880  | 6076  | 4174  | 3297  | 3416  | 3420  | 3391  | 4027  | 3813  | 4719   | 4687  | 4867  | 5072  | 5028  | 5896  | 5841  | Abcb7  |
| Abcb8  | 815   | 1000  | 891   | 900   | 974   | 998   | 786   | 2256  | 2723  | 2602  | 2383  | 2987  | 2956  | 2756  | 874   | 914   | 972   | 853   | 958   | 946   | 803   | 2804   | 2650  | 2818  | 2825  | 3016  | 2990  | 2963  | Abcb8  |
| Abcb9  | 324   | 435   | 498   | 510   | 512   | 410   | 337   | 182   | 291   | 280   | 220   | 251   | 257   | 214   | 376   | 537   | 396   | 552   | 444   | 358   | 345   | 294    | 285   | 240   | 293   | 213   | 222   | 189   | Abcb9  |
| Abcc1  | 2473  | 2437  | 1890  | 1932  | 2627  | 2508  | 2286  | 2074  | 2108  | 2016  | 1891  | 1807  | 2009  | 1737  | 2254  | 2308  | 1862  | 1996  | 2390  | 2394  | 2224  | 1756   | 1946  | 1624  | 1893  | 1453  | 1682  | 1661  | Abcc1  |
| Abcc10 | 1113  | 1424  | 1614  | 1784  | 1740  | 1562  | 1246  | 1102  | 1313  | 1615  | 1600  | 1575  | 1436  | 1377  | 1015  | 1460  | 1629  | 1597  | 1698  | 1369  | 1304  | 1664   | 1289  | 1560  | 1575  | 1275  | 1497  | 1334  | Abcc10 |
| Abcc12 | 2     | 10    | 10    | 9     | 9     | 0     | 17    | 24    | 21    | 21    | 24    | 7     | 26    | 17    | 5     | 15    | 3     | 9     | 6     | 16    | 11    | 10     | 16    | 16    | 10    | 9     | 23    | 20    | Abcc12 |
| Abcc2  | 3     | 5     | 2     | 2     | 6     | 3     | 0     | 15    | 21    | 2     | 28    | 7     | 6     | 0     | 5     | 7     | 1     | 10    | 7     | 3     | 4     | 5      | 19    | 3     | 2     | 5     | 12    | 12    | Abcc2  |
| Abcc3  | 90    | 82    | 82    | 69    | 102   | 77    | 58    | 88    | 125   | 98    | 147   | 86    | 122   | 101   | 80    | 106   | 67    | 65    | 58    | 59    | 64    | 100    | 177   | 126   | 105   | 100   | 124   | 68    | Abcc3  |
| Abcc4  | 854   | 733   | 772   | 557   | 488   | 542   | 368   | 503   | 506   | 552   | 469   | 630   | 640   | 482   | 756   | 993   | 673   | 515   | 504   | 432   | 448   | 558    | 498   | 498   | 447   | 596   | 635   | 555   | Abcc4  |
| Abcc5  | 10366 | 10726 | 6959  | 10307 | 14122 | 13236 | 13120 | 19702 | 19924 | 17736 | 19298 | 14905 | 15331 | 15100 | 11565 | 10288 | 8895  | 11410 | 11911 | 13369 | 13767 | 18376  | 18863 | 13477 | 19047 | 8446  | 14955 | 12991 | Abcc5  |
| Abcc6  | 20    | 13    | 24    | 13    | 28    | 14    | 18    | 48    | 71    | 60    | 74    | 50    | 81    | 71    | 22    | 28    | 27    | 35    | 26    | 30    | 21    | 62     | 81    | 65    | 82    | 58    | 58    | 46    | Abcc6  |
| Abcc8  | 219   | 246   | 216   | 403   | 826   | 529   | 626   | 310   | 503   | 488   | 476   | 219   | 166   | 186   | 218   | 252   | 320   | 623   | 686   | 440   | 775   | 378    | 331   | 365   | 560   | 112   | 139   | 133   | Abcc8  |
| Abcc9  | 1019  | 944   | 830   | 1132  | 1481  | 1461  | 1334  | 1633  | 1755  | 1844  | 2431  | 1783  | 1672  | 1744  | 1079  | 990   | 970   | 1252  | 1218  | 1376  | 1418  | 12257  | 2337  | 1727  | 1908  | 1138  | 1585  | 1612  | Abcc9  |
| Abcd1  | 1729  | 1991  | 1889  | 1889  | 1769  | 1846  | 1574  | 1258  | 1645  | 1656  | 1585  | 1543  | 1522  | 1410  | 1667  | 1932  | 1966  | 1972  | 1894  | 1582  | 1625  | 1526   | 1604  | 1515  | 1601  | 1615  | 1543  | 1396  | Abcd1  |
| Abcd2  | 6025  | 5835  | 6243  | 6083  | 5352  | 5797  | 7109  | 3756  | 2800  | 2787  | 2444  | 4129  | 3157  | 4283  | 6837  | 4846  | 6103  | 5801  | 5954  | 6816  | 6717  | 2679   | 2726  | 3700  | 3678  | 3631  | 4442  | 4131  | Abcd2  |
| Abcd3  | 8560  | 6995  | 6788  | 7573  | 7738  | 7656  | 8262  | 8095  | 7421  | 6834  | 6835  | 7038  | 6644  | 7292  | 8586  | 6983  | 7178  | 7741  | 7525  | 7552  | 7626  | 7588   | 7394  | 7063  | 7419  | 6871  | 7270  | Abcd3 |        |
| Abcd4  | 1669  | 1934  | 2184  | 2496  | 2783  | 2587  | 2689  | 1353  | 1563  | 1888  | 1747  | 1840  | 1774  | 1799  | 1658  | 1999  | 2300  | 3002  | 2638  | 2270  | 2548  | 1803   | 1480  | 1934  | 2036  | 1579  | 1722  | 1773  | Abcd4  |
| Abce1  | 15819 | 13141 | 13794 | 11543 | 11102 | 11803 | 12424 | 19273 | 15969 | 13966 | 14176 | 16249 | 15816 | 16298 | 16441 | 14717 | 12507 | 11451 | 11322 | 14686 | 11651 | 14574  | 16261 | 14515 | 14239 | 17364 | 17460 | 16981 | Abce1  |
| Abcf1  | 13951 | 15931 | 17241 | 15867 | 12738 | 12679 | 13711 | 7587  | 8345  | 9666  | 8880  | 10735 | 9683  | 10592 | 13378 | 14562 | 16045 | 14835 | 14022 | 12078 | 13683 | 8318   | 8129  | 10172 | 9377  | 11228 | 10388 | 10841 | Abcf1  |
| Abcf2  | 9574  | 10838 | 9537  | 9363  | 8030  | 8937  | 8771  | 7563  | 7676  | 7012  | 6723  | 8492  | 7764  | 7857  | 9200  | 9003  | 8998  | 8900  | 9555  | 9632  | 9177  | 6234   | 7440  | 7893  | 7592  | 9553  | 9267  | 8534  | Abcf2  |
| Abcf3  | 6601  | 7825  | 5952  | 6337  | 5911  | 6140  | 5991  | 4476  | 4630  | 3973  | 4014  | 4463  | 4415  | 4021  | 6879  | 6520  | 6071  | 6324  | 6263  | 6647  | 6134  | 4049   | 4689  | 4225  | 4349  | 4643  | 4396  | 4448  | Abcf3  |
| Abcg1  | 1496  | 1626  | 1652  | 2043  | 1999  | 1693  | 1861  | 1320  | 1463  | 1704  | 1324  | 1516  | 1305  | 1438  | 1435  | 1843  | 1760  | 1810  | 1908  | 1593  | 1722  | 1594   | 1345  | 1714  | 1518  | 1719  | 1214  | 1283  | Abcg1  |
| Abcg2  | 3477  | 2695  | 2948  | 2164  | 2587  | 2579  | 2249  | 3051  | 2746  | 2345  | 2737  | 2602  | 2871  | 2541  | 3390  | 3432  | 2691  | 2452  | 2208  | 2815  | 2188  | 2613   | 2174  | 2218  | 2832  | 2667  | 2623  | Abcg2 |        |
| Abcg3  | 39    | 38    | 37    | 26    | 27    | 43    | 39    | 94    | 77    | 66    | 111   | 51    | 84    | 71    | 44    | 48    | 30    | 24    | 35    | 40    | 22    | 94     | 104   | 80    | 57    | 103   | 77    | 58    | Abcg3  |
| Abcg4  | 1275  | 1576  | 1656  | 1748  | 2505  | 2007  | 1853  | 1277  | 1563  | 1622  | 1532  | 1585  | 1403  | 1533  | 1209  | 1287  | 1905  | 1826  | 2229  | 1899  | 1956  | 1978   | 1296  | 1517  | 1823  | 1098  | 1352  | 1425  | Abcg4  |
| Abcg5  | 121   | 99    | 111   | 62    | 103   | 80    | 87    | 216   | 176   | 188   | 148   | 252   | 264   | 161   | 112   | 134   | 83    | 56    | 103   | 95    | 91    | 246    | 322   | 150   | 146   | 199   | 164   | 182   | Abcg5  |
| Abcg8  | 42    | 54    | 43    | 23    | 54    | 40    | 40    | 64    | 49    | 43    | 56    | 106   | 104   | 55    | 41    | 54    | 57    | 39    | 31    | 58    | 30    | 50     | 109   | 38    | 46    | 69    | 38    | 76    | Abcg8  |
| Abhd10 | 1919  | 1591  | 1862  | 1843  | 1663  | 1730  | 1978  | 2573  | 2105  | 2203  | 2225  | 2714  | 2379  | 2579  | 2023  | 1632  | 1846  | 1712  | 1679  | 1870  | 1920  | 2555   | 2164  | 2414  | 2215  | 2383  | 2603  | 2750  | Abhd10 |
| Abhd11 | 1601  | 1956  | 1734  | 1769  | 1720  | 1569  | 1697  | 1607  | 1229  | 1428  | 1713  | 1393  | 1231  | 1208  | 1213  | 1606  | 1670  | 1622  | 1727  | 1785  | 1827  | 1589</ |       |       |       |       |       |       |        |

|          |       |       |       |       |       |       |       |       |       |       |       |       |       |       |       |       |       |       |       |       |       |       |       |       |       |       |       |       |          |       |
|----------|-------|-------|-------|-------|-------|-------|-------|-------|-------|-------|-------|-------|-------|-------|-------|-------|-------|-------|-------|-------|-------|-------|-------|-------|-------|-------|-------|-------|----------|-------|
| Abr      | 7264  | 7425  | 7436  | 9361  | 12839 | 11553 | 10760 | 14854 | 15540 | 17738 | 15224 | 15637 | 12686 | 15197 | 7481  | 6497  | 9469  | 9729  | 11995 | 9963  | 11465 | 19453 | 14861 | 16208 | 18938 | 13520 | 13444 | 13824 | Abr      |       |
| Abra     | 0     | 0     | 0     | 0     | 1     | 0     | 0     | 4     | 1     | 0     | 42    | 0     | 2     | 0     | 3     | 0     | 0     | 0     | 0     | 0     | 0     | 5     | 32    | 0     | 0     | 0     | 0     | 0     | 0        | Abra  |
| Abracl   | 2969  | 2093  | 2780  | 2269  | 2248  | 2473  | 3508  | 4384  | 3681  | 3747  | 3543  | 4712  | 3782  | 5991  | 2896  | 2263  | 2743  | 2180  | 2693  | 3126  | 3040  | 3126  | 3216  | 5144  | 4733  | 5854  | 4819  | 5712  | Abracl   |       |
| Abraxas1 | 796   | 590   | 724   | 625   | 558   | 668   | 650   | 871   | 747   | 749   | 807   | 786   | 832   | 915   | 746   | 709   | 669   | 621   | 617   | 668   | 650   | 632   | 746   | 868   | 707   | 993   | 952   | 971   | Abraxas1 |       |
| Abraxas2 | 3588  | 3427  | 3290  | 3280  | 2970  | 3063  | 3289  | 4021  | 3400  | 3176  | 3167  | 3459  | 3215  | 3461  | 3645  | 3396  | 3370  | 3142  | 3103  | 3524  | 3111  | 3232  | 3500  | 3318  | 3452  | 3702  | 3433  | 3531  | Abraxas2 |       |
| Abt1     | 1609  | 1969  | 1674  | 1826  | 1193  | 1230  | 1402  | 1078  | 1094  | 1096  | 1046  | 1336  | 1134  | 1225  | 1474  | 1578  | 1610  | 1407  | 1412  | 1568  | 1351  | 840   | 1115  | 1176  | 1123  | 1346  | 1287  | 1240  | Abt1     |       |
| Abtb1    | 2009  | 2712  | 2275  | 2576  | 2338  | 2244  | 2181  | 1741  | 2043  | 2031  | 1818  | 2017  | 2038  | 1694  | 2089  | 2353  | 2429  | 2487  | 2408  | 2300  | 2052  | 2279  | 2015  | 1942  | 2153  | 1797  | 2007  | 1800  | Abtb1    |       |
| Abtb2    | 2858  | 3855  | 3667  | 3880  | 3581  | 3246  | 2874  | 1294  | 1651  | 1634  | 1596  | 1617  | 1693  | 1397  | 3049  | 3574  | 3673  | 4008  | 3556  | 2821  | 3125  | 1659  | 1538  | 1551  | 1396  | 1574  | 1626  | 1543  | Abtb2    |       |
| Acaa1a   | 3488  | 4310  | 3999  | 4692  | 4583  | 4166  | 3743  | 3588  | 4407  | 4048  | 4534  | 4125  | 3963  | 3588  | 3446  | 3967  | 4266  | 4477  | 4514  | 3916  | 3830  | 4248  | 4278  | 4469  | 4615  | 4076  | 4098  | 3660  | Acaa1a   |       |
| Acaa1b   | 189   | 207   | 231   | 232   | 205   | 188   | 145   | 83    | 103   | 72    | 69    | 66    | 73    | 72    | 166   | 220   | 279   | 207   | 210   | 169   | 128   | 79    | 84    | 87    | 41    | 73    | 64    | 45    | Acaa1b   |       |
| Acaa2    | 3060  | 3064  | 2699  | 2256  | 1993  | 2336  | 2019  | 1718  | 2289  | 1690  | 1803  | 1590  | 1775  | 1402  | 2760  | 2768  | 2506  | 2194  | 2292  | 2337  | 2038  | 1382  | 2456  | 1717  | 1498  | 1860  | 1513  | 1525  | Acaa2    |       |
| Acac     | 15165 | 16056 | 9412  | 13504 | 14441 | 16301 | 14225 | 12767 | 13215 | 12262 | 11716 | 13396 | 13730 | 12573 | 15381 | 15075 | 10785 | 13795 | 14611 | 14687 | 16001 | 10599 | 11378 | 9798  | 13124 | 7997  | 14177 | 12352 | Acac     |       |
| Acacb    | 758   | 1088  | 825   | 1161  | 901   | 958   | 962   | 205   | 264   | 263   | 260   | 277   | 311   | 221   | 703   | 1030  | 1005  | 1191  | 846   | 865   | 895   | 249   | 334   | 244   | 236   | 203   | 277   | 249   | Acacb    |       |
| Acad10   | 188   | 225   | 276   | 284   | 236   | 247   | 215   | 201   | 236   | 249   | 233   | 269   | 287   | 203   | 190   | 213   | 286   | 265   | 251   | 197   | 208   | 234   | 224   | 299   | 218   | 265   | 246   | 275   | Acad10   |       |
| Acad11   | 1410  | 1386  | 1087  | 893   | 920   | 896   | 878   | 1071  | 1022  | 871   | 825   | 794   | 906   | 784   | 1466  | 1462  | 1148  | 991   | 916   | 1026  | 886   | 775   | 1166  | 856   | 722   | 801   | 854   | 888   | Acad11   |       |
| Acad12   | 128   | 156   | 135   | 142   | 112   | 145   | 120   | 173   | 185   | 196   | 190   | 153   | 186   | 180   | 152   | 150   | 123   | 128   | 104   | 147   | 121   | 177   | 233   | 208   | 188   | 257   | 184   | 159   | Acad12   |       |
| Acad8    | 2024  | 1861  | 2272  | 1926  | 2007  | 1868  | 2092  | 2359  | 2375  | 2255  | 2502  | 2656  | 2369  | 2488  | 1909  | 1802  | 2071  | 2082  | 2156  | 2096  | 1901  | 2304  | 2485  | 2411  | 2281  | 2806  | 2398  | 2427  | Acad8    |       |
| Acad9    | 3624  | 3725  | 2898  | 3281  | 2947  | 3182  | 3235  | 3120  | 2942  | 2637  | 2863  | 2780  | 2860  | 2927  | 3700  | 3587  | 2968  | 3198  | 3028  | 3484  | 3334  | 2511  | 2996  | 2661  | 2900  | 2372  | 3169  | 2873  | Acad9    |       |
| Acadml   | 2711  | 2444  | 3124  | 1976  | 2083  | 2078  | 1863  | 2181  | 2445  | 2040  | 2703  | 2274  | 2557  | 2374  | 2848  | 2923  | 2369  | 2004  | 1997  | 1901  | 1893  | 2326  | 2889  | 1943  | 1942  | 2445  | 2266  | 2546  | Acadml   |       |
| Acadm    | 5180  | 5453  | 5199  | 5342  | 4669  | 5070  | 5222  | 2955  | 3009  | 2656  | 2974  | 2696  | 3063  | 2710  | 5662  | 5541  | 5244  | 5194  | 4950  | 5680  | 5067  | 2685  | 3224  | 2589  | 2493  | 2792  | 2888  | 2791  | Acadm    |       |
| Acads    | 1638  | 1978  | 2299  | 1745  | 1623  | 1610  | 1222  | 1172  | 1373  | 1341  | 1316  | 1516  | 1729  | 1403  | 1526  | 2030  | 1876  | 1665  | 1714  | 1436  | 1361  | 1068  | 1467  | 1454  | 1342  | 1870  | 1614  | 1561  | Acads    |       |
| Acadsb   | 6615  | 5532  | 5368  | 5716  | 5905  | 6157  | 6011  | 7017  | 6287  | 6143  | 6088  | 5561  | 5846  | 5577  | 6998  | 6406  | 5198  | 6009  | 5556  | 6895  | 6293  | 6211  | 6585  | 5286  | 5994  | 4814  | 5684  | 5617  | Acadsb   |       |
| Acadvl   | 2523  | 2949  | 2480  | 2568  | 2310  | 2407  | 2151  | 2651  | 2881  | 2536  | 2795  | 2474  | 2758  | 2263  | 2457  | 2783  | 2554  | 2531  | 2311  | 2383  | 2129  | 2521  | 3106  | 2632  | 2587  | 2617  | 2538  | 2489  | Acadvl   |       |
| Acan     | 144   | 200   | 51    | 424   | 155   | 1141  | 31    | 441   | 2586  | 3469  | 7662  | 137   | 342   | 180   | 150   | 262   | 102   | 932   | 422   | 36    | 30    | 3945  | 1416  | 1880  | 2452  | 397   | 193   | 87    | Acan     |       |
| Acap1    | 92    | 111   | 125   | 131   | 93    | 70    | 107   | 70    | 64    | 89    | 109   | 119   | 93    | 133   | 80    | 79    | 165   | 123   | 111   | 68    | 107   | 72    | 81    | 106   | 76    | 121   | 131   | 112   | Acap1    |       |
| Acap2    | 11798 | 10121 | 8894  | 9790  | 9583  | 11028 | 11225 | 6398  | 6068  | 5475  | 6130  | 6221  | 6135  | 6641  | 11224 | 11147 | 9199  | 10202 | 8951  | 10803 | 11046 | 5544  | 6092  | 5801  | 5790  | 4789  | 6478  | 5986  | Acap2    |       |
| Acap3    | 6031  | 8022  | 6833  | 9766  | 9133  | 8509  | 7725  | 5112  | 5464  | 6472  | 5764  | 6118  | 5285  | 5337  | 6029  | 7016  | 8343  | 9928  | 9163  | 6924  | 8619  | 7603  | 4910  | 6110  | 7660  | 4828  | 5498  | 5001  | Acap3    |       |
| Acata1   | 1711  | 6316  | 5043  | 7415  | 8231  | 8129  | 8494  | 8981  | 9459  | 7815  | 9269  | 6178  | 6347  | 6685  | 7632  | 6185  | 5828  | 8015  | 7910  | 9187  | 8706  | 8224  | 9930  | 7577  | 8350  | 6683  | 5850  | 6139  | Acata1   |       |
| Acata2   | 12041 | 12278 | 13143 | 11982 | 10740 | 11135 |       | 13184 | 10149 | 10123 | 8143  | 12914 | 12853 | 13534 | 12657 | 11055 | 13128 | 11748 | 12150 | 11753 | 11827 | 10843 | 9215  | 11739 | 12137 | 13984 | 14655 | 16301 | Acata2   |       |
| Acata3   | 130   | 97    | 115   | 116   | 90    | 144   | 87    | 72    | 41    | 70    | 74    | 55    | 50    | 66    | 127   | 98    | 109   | 109   | 86    | 86    | 80    | 84    | 32    | 59    | 76    | 67    | 60    | 75    | Acata3   |       |
| Acab3    | 4520  | 4085  | 4702  | 4810  | 4696  | 4483  | 4559  | 4500  | 4157  | 4230  | 4870  | 4452  | 4280  | 4548  | 4585  | 4358  | 4731  | 4866  | 4507  | 4126  | 4442  | 5021  | 4162  | 4610  | 4514  | 4335  | 4256  | 4322  | Acab3    |       |
| Acba4    | 738   | 739   | 879   | 694   | 623   | 591   | 596   | 151   | 255   | 256   | 246   | 197   | 264   | 184   | 633   | 819   | 716   | 759   | 660   | 585   | 533   | 202   | 315   | 226   | 180   | 213   | 216   | 165   | Acba4    |       |
| Acba5    | 5812  | 4564  | 5729  | 6305  | 6884  | 6445  | 7634  | 6977  | 5820  | 5855  | 5709  | 5813  | 5736  | 6068  | 6651  | 5599  | 5981  | 6234  | 6338  | 7193  | 7073  | 6986  | 5875  | 5934  | 6163  | 5458  | 5957  | 6051  | Acba5    |       |
| Acbb6    | 2549  | 2555  | 2801  | 2897  | 2914  | 2876  | 3064  | 2105  | 2104  | 2313  | 2283  | 2439  | 2087  | 2580  | 2643  | 2239  | 2932  | 2845  | 3123  | 2423  | 3228  | 2418  | 2186  | 2531  | 2605  | 2734  | 2269  | 2492  | Acbb6    |       |
| Acbb7    | 39    | 29    | 32    | 76    | 33    | 27    | 54    | 17    | 13    | 3     | 14    | 7     | 3     | 11    | 32    | 31    | 27    | 35    | 35    | 25    | 31    | 15    | 16    | 18    | 16    | 5     | 2     | 14    | Acbb7    |       |
| Accs     | 1381  | 1300  | 1197  | 1342  | 1623  | 1706  | 1643  | 1646  | 1798  | 1960  | 1801  | 2180  | 2082  | 2162  | 1366  | 1224  | 1403  | 1393  | 1572  | 1598  | 1524  | 1731  | 1581  | 1963  | 1975  | 1790  | 2141  | 1995  | Accs     |       |
| Accsl    | 16    | 18    | 13    | 27    | 41    | 29    | 54    | 13    | 18    | 22    | 24    | 22    | 14    | 22    | 38    | 16    | 3     | 39    | 36    | 33    | 37    | 30    | 17    | 11    | 16    | 19    | 35    | 28    | Accsl    |       |
| Acd      | 4361  | 5911  | 4451  | 5299  | 4773  | 4367  | 4784  | 2198  | 2454  | 2561  | 2426  | 2822  | 2584  | 2736  | 4350  | 4641  | 5201  | 4998  | 5121  | 4424  | 4693  | 2602  | 2238  | 2734  | 2695  | 2995  | 2535  | 2578  | Acd      |       |
| Ace      | 193   | 270   | 300   | 338   | 449   | 353   | 250   | 307   | 383   | 392   | 348   | 262   | 330   | 176   | 249   | 325   | 253   | 371   | 352   | 292   | 356   | 541   | 441   | 336   | 389   | 235   | 279   | 246   | Ace      |       |
| Ace2     | 22    | 10    | 12    | 0     | 16    | 0     | 0     | 40    | 59    | 43    | 16    | 1     | 11    | 6     | 15    | 18    | 2     | 10    | 2     | 9     | 3     | 17    | 104   | 14    | 23    | 9     | 3     | 11    | Ace2     |       |
| Ace3     | 0     | 0     | 0     | 0     | 0     | 0     | 0     | 0     | 0     | 0     | 0     | 0     | 0     | 0     | 1     | 0     | 0     | 0     | 0     | 0     | 0     | 0     | 0     | 0     | 0     | 0     | 0     | 0     | 0        | Ace3  |
| Acer1    | 0     | 0     | 0     | 0     | 0     | 0     | 0     | 4     | 3     | 5     | 0     | 0     | 0     | 0     | 0     | 0     | 0     | 0     | 1     | 1     | 1     | 0     | 0     | 0     | 0     | 0     | 0     | 0     | 0        | Acer1 |
| Acer2    | 1051  | 929   | 1116  | 1025  | 1034  | 1164  | 870   | 1025  | 1071  | 1404  | 1191  | 930   | 1076  | 994   | 1043  | 1099  | 1049  | 941   | 974   | 1021  | 895   | 1327  | 1165  | 1192  | 1123  | 1055  | 954   | 983   | Acer2    |       |
| Acer3    | 1959  | 1377  | 1596  | 1372  | 1651  | 1803  | 1700  | 1253  | 1217  | 952   | 1077  | 948   | 1117  | 1126  | 1941  | 1835  | 1399  | 1608  | 1380  | 1806  | 1616  | 1121  | 1206  | 852   | 935   | 1013  | 1190  | 1093  | Acer3    |       |
| Ache     | 767   | 903   | 1124  | 1343  | 1602  | 1151  | 1196  | 579   | 681   | 740   | 1202  | 401   | 625   | 454   | 790   | 938   | 1356  | 1267  | 1364  | 995   | 1167  | 1034  | 841   | 499   | 616   | 431   | 399   | 500   | Ache     |       |
| Acin1    | 16594 | 18709 | 24755 | 23426 | 21893 | 20676 | 21007 | 23913 | 25047 | 31593 | 29256 | 33202 | 29290 | 34805 | 16220 | 16708 | 24501 | 21332 | 24206 | 18135 | 21715 | 27686 | 23532 | 35565 | 32445 | 32849 | 31337 | 33146 | Acin1    |       |
| Ackr1    | 1048  | 1580  | 1514  | 2308  | 2434  | 1967  | 2485  | 824   | 819   | 1051  | 861   | 869   | 797   | 835   | 1288  | 1307  | 1882  | 2641  | 2371  | 1830  | 2330  | 1369  | 741   | 862   | 1100  | 676   | 764   | 724   | Ackr1    |       |
| Ackr2    | 29    | 45    | 18    | 53    | 77    | 66    | 78    | 103   | 105   | 80    | 66    | 104   | 60    | 82    | 54    | 21    | 59    | 61    | 48    | 86    | 60    | 122   | 87    | 101   | 118   | 63    | 99    | 76    | Ackr2    |       |
| Ackr3    | 2651  |       |       |       |       |       |       |       |       |       |       |       |       |       |       |       |       |       |       |       |       |       |       |       |       |       |       |       |          |       |

|        |       |       |       |       |       |       |       |       |        |        |        |        |        |        |       |       |       |       |       |       |       |        |        |        |        |        |        |        |        |
|--------|-------|-------|-------|-------|-------|-------|-------|-------|--------|--------|--------|--------|--------|--------|-------|-------|-------|-------|-------|-------|-------|--------|--------|--------|--------|--------|--------|--------|--------|
| Acp7   | 2     | 1     | 0     | 0     | 6     | 0     | 0     | 1     | 2      | 3      | 4      | 0      | 1      | 1      | 3     | 0     | 3     | 6     | 1     | 2     | 1     | 2      | 5      | 0      | 1      | 0      | 0      | 0      | Acp7   |
| Accp   | 153   | 51    | 17    | 32    | 70    | 24    | 21    | 110   | 138    | 123    | 67     | 17     | 73     | 28     | 66    | 81    | 23    | 30    | 28    | 37    | 31    | 50     | 146    | 67     | 50     | 48     | 16     | 21     | Accp   |
| Acrr   | 120   | 144   | 117   | 188   | 310   | 260   | 238   | 147   | 229    | 267    | 233    | 230    | 238    | 269    | 109   | 129   | 136   | 248   | 275   | 234   | 238   | 287    | 174    | 254    | 302    | 203    | 210    | 185    | Acrr   |
| Acrrb  | 408   | 509   | 519   | 579   | 670   | 564   | 571   | 723   | 666    | 949    | 845    | 773    | 820    | 838    | 410   | 412   | 687   | 683   | 703   | 479   | 620   | 944    | 653    | 995    | 940    | 784    | 757    | 803    | Acrrb  |
| Acrrv1 | 0     | 0     | 0     | 0     | 0     | 0     | 0     | 0     | 0      | 0      | 0      | 0      | 0      | 0      | 0     | 0     | 0     | 0     | 0     | 0     | 0     | 0      | 0      | 0      | 0      | 1      | 0      | 0      | Acrrv1 |
| Acsgb1 | 496   | 563   | 496   | 447   | 544   | 560   | 539   | 524   | 725    | 715    | 568    | 1006   | 598    | 930    | 406   | 305   | 539   | 494   | 592   | 433   | 553   | 585    | 506    | 684    | 772    | 976    | 983    | 892    | Acsgb1 |
| Acsgb2 | 3     | 1     | 0     | 0     | 1     | 0     | 2     | 0     | 1      | 0      | 4      | 3      | 2      | 2      | 1     | 0     | 2     | 1     | 0     | 2     | 1     | 0      | 1      | 0      | 0      | 0      | 0      | 0      | Acsgb2 |
| Acsgb3 | 0     | 2     | 1     | 0     | 4     | 1     | 4     | 1     | 2      | 3      | 1      | 5      | 8      | 1      | 0     | 2     | 5     | 3     | 1     | 0     | 4     | 2      | 6      | 2      | 2      | 1      | 10     | 4      | Acsgb3 |
| Acsf2  | 1404  | 1516  | 1823  | 1291  | 1126  | 1073  | 780   | 1123  | 1584   | 1517   | 1720   | 1623   | 1505   | 1527   | 1193  | 1819  | 1440  | 1372  | 1089  | 841   | 862   | 1267   | 1606   | 1539   | 1176   | 2151   | 1447   | 1412   | Acsf2  |
| Acsf3  | 339   | 394   | 447   | 448   | 494   | 444   | 371   | 913   | 1162   | 1155   | 1313   | 1388   | 1246   | 1194   | 324   | 410   | 429   | 381   | 489   | 407   | 406   | 1158   | 1166   | 1283   | 1204   | 1364   | 1339   | 1258   | Acsf3  |
| Acsi1  | 3638  | 3496  | 3261  | 3325  | 3227  | 3042  | 3196  | 1106  | 1174   | 1064   | 1309   | 816    | 1195   | 791    | 3617  | 3658  | 3182  | 3258  | 2923  | 2865  | 3161  | 1347   | 1273   | 833    | 927    | 752    | 884    | 892    | Acsi1  |
| Acsi3  | 12334 | 11245 | 11381 | 10783 | 9401  | 9360  | 10715 | 8067  | 6401   | 6525   | 6514   | 7450   | 6931   | 8020   | 12634 | 11843 | 10888 | 10564 | 9432  | 11137 | 9605  | 7102   | 6319   | 7106   | 6549   | 8579   | 7845   | 8428   | Acsi3  |
| AcsI4  | 5368  | 4427  | 5374  | 4848  | 4813  | 4959  | 5322  | 3229  | 2687   | 2575   | 3048   | 3170   | 3561   | 3460   | 5840  | 5455  | 4943  | 4412  | 4470  | 4697  | 4851  | 3101   | 2500   | 2430   | 2846   | 2814   | 3519   | 3666   | AcsI4  |
| AcsI5  | 1066  | 809   | 924   | 603   | 766   | 733   | 593   | 1657  | 1631   | 1371   | 1518   | 1426   | 1626   | 1344   | 1048  | 1012  | 713   | 580   | 631   | 773   | 599   | 1343   | 1792   | 1409   | 1117   | 1665   | 1419   | 1540   | AcsI5  |
| AcsI6  | 2543  | 2756  | 3000  | 3436  | 5501  | 4665  | 4597  | 5046  | 4440   | 5305   | 4352   | 5158   | 4540   | 5154   | 3003  | 2196  | 3554  | 3487  | 4955  | 4375  | 4899  | 6154   | 4267   | 4760   | 6057   | 3395   | 4918   | 4771   | AcsI6  |
| Acsm1  | 0     | 0     | 0     | 0     | 0     | 0     | 0     | 4     | 6      | 7      | 2      | 0      | 0      | 1      | 0     | 0     | 0     | 0     | 0     | 0     | 0     | 0      | 1      | 0      | 0      | 6      | 0      | 1      | Acsm1  |
| Acsm2  | 1     | 0     | 0     | 0     | 0     | 0     | 0     | 0     | 0      | 1      | 0      | 0      | 0      | 0      | 0     | 0     | 0     | 0     | 0     | 0     | 0     | 0      | 1      | 0      | 0      | 0      | 0      | 0      | Acsm2  |
| Acsm3  | 3     | 2     | 0     | 0     | 1     | 1     | 1     | 1     | 7      | 0      | 2      | 5      | 3      | 2      | 0     | 0     | 0     | 0     | 2     | 0     | 0     | 7      | 3      | 7      | 6      | 1      | 2      | 1      | Acsm3  |
| Acsm4  | 338   | 215   | 0     | 302   | 0     | 2     | 1     | 375   | 235    | 486    | 320    | 1      | 228    | 103    | 235   | 275   | 64    | 0     | 1     | 0     | 0     | 0      | 401    | 713    | 1      | 911    | 0      | 0      | Acsm4  |
| Acsm5  | 0     | 0     | 0     | 0     | 0     | 0     | 0     | 0     | 0      | 0      | 0      | 0      | 0      | 0      | 0     | 0     | 0     | 0     | 0     | 2     | 0     | 0      | 0      | 0      | 0      | 1      | 0      | 0      | Acsm5  |
| AcsS1  | 2331  | 2769  | 2438  | 2676  | 2468  | 2789  | 2870  | 3116  | 3030   | 3119   | 2427   | 4586   | 3224   | 4373   | 2669  | 2257  | 3115  | 2490  | 2748  | 2370  | 2481  | 3018   | 2023   | 3511   | 3531   | 4507   | 3707   | 3734   | AcsS1  |
| AcsS2  | 3869  | 4668  | 3511  | 4143  | 3629  | 3711  | 3791  | 2105  | 1919   | 1933   | 1760   | 1912   | 1948   | 1808   | 4221  | 4045  | 3819  | 3649  | 3896  | 4009  | 3870  | 2012   | 1889   | 1844   | 1914   | 1929   | 1983   | 1875   | AcsS2  |
| AcsS3  | 2211  | 1394  | 1648  | 1054  | 807   | 992   | 705   | 977   | 1037   | 828    | 1083   | 683    | 1093   | 650    | 1692  | 2500  | 1105  | 1075  | 723   | 808   | 634   | 800    | 1175   | 779    | 453    | 637    | 586    | 646    | AcsS3  |
| Acta1  | 123   | 41    | 23    | 50    | 61    | 47    | 47    | 211   | 586    | 120    | 4987   | 41     | 108    | 36     | 59    | 109   | 75    | 41    | 55    | 37    | 45    | 386    | 3415   | 100    | 86     | 21     | 17     | 20     | Acta1  |
| Acta2  | 3151  | 3653  | 2124  | 2072  | 411   | 2947  | 231   | 2805  | 3707   | 1808   | 6515   | 3818   | 4560   | 3873   | 3993  | 3579  | 2525  | 2845  | 445   | 400   | 277   | 2115   | 6405   | 2903   | 1743   | 2212   | 4283   | 3607   | Acta2  |
| Actb   | 88182 | 99792 | 96469 | 87355 | 82410 | 87040 | 84310 | 99147 | 120896 | 118443 | 111570 | 132637 | 135651 | 131534 | 89394 | 94787 | 91605 | 83304 | 86617 | 84993 | 83424 | 108985 | 118458 | 129768 | 121549 | 157428 | 134215 | 139806 | Actb   |
| Actbl2 | 0     | 0     | 0     | 0     | 0     | 0     | 0     | 0     | 1      | 0      | 1      | 0      | 3      | 3      | 0     | 2     | 0     | 0     | 0     | 0     | 1     | 5      | 5      | 2      | 3      | 6      | 0      | 0      | Actbl2 |
| Actc1  | 503   | 38    | 18    | 9     | 65    | 28    | 22    | 662   | 1804   | 190    | 11268  | 70     | 500    | 16     | 174   | 459   | 38    | 35    | 8     | 13    | 9     | 1138   | 7861   | 181    | 189    | 39     | 16     | 26     | Actc1  |
| Acte1  | 0     | 3     | 2     | 1     | 4     | 3     | 0     | 0     | 1      | 0      | 0      | 0      | 0      | 0      | 2     | 0     | 0     | 1     | 3     | 0     | 0     | 0      | 0      | 0      | 0      | 0      | 0      | 0      | Acte1  |
| Actg1  | 79836 | 98697 | 83982 | 85665 | 83983 | 83203 | 77385 | 69487 | 84269  | 74917  | 77123  | 82592  | 86579  | 80138  | 83632 | 95706 | 85787 | 89596 | 88860 | 78917 | 79013 | 84895  | 81019  | 78078  | 84443  | 91024  | 84703  | 82380  | Actg1  |
| Actg2  | 174   | 188   | 111   | 141   | 31    | 187   | 27    | 183   | 204    | 137    | 255    | 247    | 225    | 295    | 227   | 231   | 109   | 163   | 29    | 38    | 32    | 142    | 262    | 201    | 152    | 187    | 301    | 249    | Actg2  |
| ActI10 | 1     | 1     | 5     | 3     | 2     | 0     | 4     | 0     | 0      | 0      | 0      | 1      | 0      | 3      | 2     | 0     | 1     | 2     | 2     | 5     | 3     | 3      | 4      | 4      | 3      | 0      | 6      | 1      | ActI10 |
| ActI6a | 6106  | 6011  | 6076  | 4973  | 4084  | 4652  | 5085  | 7214  | 6266   | 5831   | 5093   | 8018   | 6975   | 8125   | 5850  | 5226  | 5270  | 4340  | 5129  | 5550  | 4749  | 5237   | 5752   | 6957   | 6375   | 9177   | 8625   | 8780   | ActI6a |
| ActI6b | 2293  | 3655  | 2814  | 5733  | 7100  | 5995  | 6120  | 4217  | 4364   | 5592   | 4393   | 4121   | 3670   | 4339   | 3257  | 2636  | 4824  | 6101  | 7028  | 5994  | 6579  | 6041   | 4121   | 4769   | 6329   | 3201   | 3683   | 3521   | ActI6b |
| ActI7a | 0     | 0     | 0     | 0     | 0     | 0     | 0     | 1     | 0      | 2      | 0      | 0      | 1      | 0      | 0     | 2     | 0     | 0     | 0     | 0     | 0     | 0      | 1      | 3      | 1      | 0      | 0      | 0      | ActI7a |
| ActI7b | 9     | 8     | 28    | 15    | 6     | 3     | 7     | 1     | 3      | 6      | 2      | 0      | 1      | 3      | 5     | 6     | 9     | 5     | 4     | 9     | 3     | 3      | 2      | 9      | 3      | 1      | 4      | ActI7b |        |
| ActI9  | 0     | 0     | 0     | 0     | 2     | 5     | 0     | 4     | 5      | 0      | 4      | 5      | 0      | 0      | 0     | 0     | 0     | 1     | 2     | 2     | 0     | 1      | 4      | 4      | 1      | 2      | 4      | ActI9  |        |
| Actn1  | 7173  | 7113  | 8457  | 6478  | 5312  | 5446  | 4894  | 4684  | 5712   | 5517   | 6364   | 6042   | 6526   | 5829   | 6328  | 8073  | 7103  | 6430  | 5822  | 4060  | 5278  | 4640   | 5744   | 6450   | 4876   | 7871   | 6163   | 6101   | Actn1  |
| Actn2  | 345   | 250   | 279   | 253   | 304   | 203   | 264   | 250   | 652    | 190    | 4473   | 98     | 222    | 67     | 291   | 386   | 268   | 232   | 246   | 232   | 202   | 456    | 2617   | 101    | 150    | 65     | 80     | 81     | Actn2  |
| Actn3  | 161   | 229   | 126   | 160   | 99    | 151   | 73    | 140   | 230    | 165    | 347    | 122    | 171    | 136    | 187   | 244   | 102   | 133   | 107   | 90    | 60    | 152    | 329    | 147    | 129    | 114    | 126    | 108    | Actn3  |
| Actn4  | 20617 | 23736 | 21591 | 18818 | 15203 | 16826 | 14434 | 10805 | 14190  | 12556  | 14129  | 13240  | 14078  | 12638  | 19229 | 24464 | 18426 | 19167 | 16113 | 13634 | 15026 | 11294  | 14378  | 13421  | 11896  | 14412  | 13179  | 13111  | Actn4  |
| Actn10 | 10961 | 9848  | 9394  | 10914 | 11103 | 11210 | 11939 | 10378 | 8296   | 8382   | 7885   | 8090   | 8219   | 8699   | 11772 | 9997  | 9843  | 11008 | 10996 | 11912 | 12141 | 9454   | 8589   | 8360   | 8838   | 8169   | 8306   | 8748   | Actn10 |
| Actr1a | 16815 | 20136 | 15878 | 16374 | 18213 | 18447 | 18739 | 19925 | 19462  | 17411  | 16132  | 18236  | 17047  | 18729  | 17845 | 15524 | 17207 | 16753 | 19113 | 19550 | 19272 | 19233  | 18716  | 18208  | 20023  | 18153  | 18599  | 18465  | Actr1a |
| Actr1b | 11066 | 12628 | 12735 | 12925 | 11596 | 11287 | 11238 | 7344  | 8424   | 8946   | 9378   | 9236   | 9118   | 9357   | 10568 | 11858 | 12466 | 12097 | 11697 | 10204 | 11268 | 8808   | 8181   | 9246   | 9149   | 10302  | 9104   | 9193   | Actr1b |
| Actr2  | 24592 | 20397 | 25541 | 23148 | 23131 | 22421 | 24825 | 26036 | 21523  | 21461  | 21509  | 22685  | 22531  | 24778  | 26074 | 22292 | 23330 | 23140 | 22152 | 26104 | 23670 | 23078  | 21591  | 22352  | 24372  | 23051  | 24033  | 24519  | Actr2  |
| Actr3  | 18497 | 14489 | 18612 | 17581 | 18803 | 18251 | 20131 | 21704 | 19411  | 19438  | 18742  | 20996  | 19490  | 21506  | 18834 | 16026 | 18052 | 17460 | 18741 | 17820 | 19147 | 21158  | 19935  | 20090  | 20544  | 21844  | 20529  | 21367  | Actr3  |
| Actr3b | 1142  | 1192  | 988   | 1386  | 1416  | 1287  | 1627  | 617   | 752    | 671    | 518    | 792    | 540    | 667    | 1096  | 856   | 1286  | 1480  | 1604  | 1554  | 1557  | 658    | 592    | 704    | 871    | 934    | 588    | 640    | Actr3b |
| Actr5  | 1739  | 2126  | 1631  | 2317  | 1887  | 1963  | 1867  | 1189  | 1233   | 1169   | 1305   | 1312   | 1330   | 1271   | 1611  | 2045  | 2166  | 2138  | 1829  | 2075  | 1103  | 1155   | 1295   | 1315   | 1434   | 1354   | 1296   | Actr5  |        |
| Actr6  | 2608  | 2029  | 2278  | 2382  | 2059  | 2318  | 2730  | 1986  | 1811   | 1668   | 1454   | 1650   | 1716   | 1806   | 2660  | 2420  | 2267  | 2367  | 2349  | 2916  | 2440  | 1611   | 1869   | 1777   | 1631   | 1926   | 1758   | 1782   | Actr6  |
| Actr8  | 2540  | 2415  | 2344  | 2176  | 2564  | 2339  | 2430  | 3918  | 3536   | 3655   | 3381   | 3922   | 3880   | 3978   | 2349  | 2090  | 2428  | 2139  | 2717  | 2489  | 2456  | 3706   | 3771   | 3790   | 4071   | 4063   | 3961   | Actr8  |        |
| Actr31 | 46    | 41    | 33    | 37    | 83    | 69    | 80    | 11    | 7      | 7      | 9      | 20     | 15     | 14     | 70    |       |       |       |       |       |       |        |        |        |        |        |        |        |        |







|         |       |       |       |       |       |       |       |       |       |       |       |       |       |       |       |       |       |       |       |       |       |       |       |       |       |       |       |       |         |      |
|---------|-------|-------|-------|-------|-------|-------|-------|-------|-------|-------|-------|-------|-------|-------|-------|-------|-------|-------|-------|-------|-------|-------|-------|-------|-------|-------|-------|-------|---------|------|
| Adgrg1  | 5118  | 6560  | 7787  | 7524  | 9803  | 8340  | 8419  | 14842 | 15384 | 18766 | 14160 | 23079 | 19251 | 20783 | 6247  | 5415  | 9115  | 7204  | 10491 | 7386  | 8292  | 21564 | 13414 | 19932 | 21367 | 20443 | 18986 | 20610 | Adgrg1  |      |
| Adgrg2  | 218   | 160   | 119   | 201   | 336   | 189   | 182   | 583   | 694   | 526   | 683   | 343   | 359   | 377   | 260   | 236   | 149   | 216   | 210   | 198   | 175   | 769   | 530   | 327   | 450   | 226   | 370   | 320   | Adgrg2  |      |
| Adgrg3  | 193   | 253   | 213   | 185   | 204   | 151   | 159   | 131   | 159   | 175   | 219   | 196   | 296   | 154   | 198   | 287   | 257   | 199   | 186   | 175   | 187   | 192   | 186   | 134   | 173   | 216   | 191   | 165   | Adgrg3  |      |
| Adgrg4  | 0     | 1     | 0     | 0     | 0     | 0     | 0     | 1     | 0     | 0     | 1     | 1     | 0     | 2     | 0     | 0     | 0     | 0     | 0     | 0     | 0     | 0     | 2     | 0     | 0     | 0     | 0     | 0     | Adgrg4  |      |
| Adgrg5  | 14    | 11    | 18    | 6     | 11    | 10    | 6     | 15    | 18    | 6     | 19    | 9     | 14    | 12    | 13    | 15    | 2     | 17    | 13    | 13    | 7     | 12    | 13    | 15    | 10    | 21    | 19    | 18    | Adgrg5  |      |
| Adgrg6  | 989   | 872   | 656   | 569   | 584   | 876   | 253   | 1409  | 1817  | 1329  | 2698  | 1132  | 1683  | 1109  | 1100  | 1062  | 663   | 914   | 337   | 303   | 273   | 1641  | 2177  | 1295  | 1198  | 723   | 1298  | 990   | Adgrg6  |      |
| Adgrg7  | 0     | 0     | 0     | 0     | 0     | 0     | 0     | 0     | 2     | 0     | 0     | 0     | 0     | 0     | 0     | 0     | 0     | 0     | 0     | 2     | 0     | 0     | 1     | 0     | 2     | 0     | 0     | 0     | Adgrg7  |      |
| Adgrl1  | 22026 | 27298 | 33710 | 37764 | 36918 | 32634 | 33245 | 19501 | 22673 | 29683 | 27019 | 26426 | 23534 | 25059 | 20276 | 24974 | 37521 | 37243 | 39123 | 26165 | 33738 | 32078 | 20186 | 30291 | 32104 | 22372 | 22048 | 22947 | Adgrl1  |      |
| Adgrl2  | 13086 | 12558 | 12906 | 13449 | 17290 | 16140 | 15488 | 17215 | 17932 | 20191 | 19705 | 20299 | 20080 | 19987 | 12869 | 11628 | 13254 | 13804 | 15716 | 13925 | 16050 | 19380 | 17204 | 18033 | 20236 | 12994 | 20161 | 20302 | Adgrl2  |      |
| Adgrl3  | 4591  | 4450  | 3096  | 5177  | 6379  | 6165  | 5744  | 6567  | 6377  | 6030  | 6034  | 4712  | 5101  | 4582  | 4956  | 4445  | 4162  | 5491  | 5421  | 6143  | 6046  | 7294  | 6215  | 4606  | 6169  | 3023  | 4614  | 4599  | Adgrl3  |      |
| Adgrl4  | 865   | 751   | 861   | 871   | 939   | 1015  | 914   | 1065  | 916   | 844   | 865   | 901   | 875   | 913   | 1030  | 834   | 732   | 963   | 801   | 1064  | 912   | 1081  | 1088  | 830   | 980   | 940   | 930   | 814   | Adgrl4  |      |
| Adgrv1  | 14366 | 17598 | 8258  | 8507  | 7751  | 11084 | 10211 | 10159 | 7659  | 4731  | 4291  | 6928  | 6108  | 7123  | 17275 | 14299 | 9347  | 8106  | 8679  | 15189 | 11757 | 5396  | 7587  | 4481  | 5399  | 4529  | 9621  | 6903  | Adgrv1  |      |
| Adh1    | 14    | 17    | 5     | 15    | 16    | 78    | 4     | 43    | 80    | 80    | 100   | 29    | 18    | 37    | 24    | 12    | 8     | 30    | 19    | 9     | 9     | 15    | 133   | 85    | 46    | 19    | 27    | 19    | Adh1    |      |
| Adh4    | 5     | 1     | 1     | 0     | 0     | 0     | 2     | 0     | 0     | 0     | 1     | 1     | 0     | 0     | 0     | 0     | 2     | 0     | 0     | 2     | 0     | 1     | 2     | 0     | 0     | 0     | 1     | 0     | Adh4    |      |
| Adh5    | 12505 | 13235 | 11535 | 11381 | 10158 | 10836 | 11824 | 11364 | 10539 | 9566  | 8971  | 10540 | 9679  | 10867 | 13043 | 11799 | 11778 | 10636 | 11974 | 13382 | 11750 | 9052  | 10485 | 10358 | 10043 | 11906 | 11390 | 11472 | Adh5    |      |
| Adh6a   | 2     | 0     | 0     | 0     | 1     | 0     | 0     | 2     | 0     | 3     | 0     | 0     | 0     | 0     | 0     | 0     | 0     | 0     | 0     | 0     | 0     | 0     | 3     | 1     | 0     | 0     | 0     | 0     | Adh6a   |      |
| Adh6b   | 15    | 10    | 36    | 2     | 5     | 10    | 11    | 23    | 26    | 11    | 22    | 20    | 27    | 28    | 11    | 18    | 28    | 11    | 18    | 7     | 8     | 20    | 34    | 25    | 20    | 9     | 41    | 24    | Adh6b   |      |
| Adh7    | 13    | 21    | 24    | 53    | 33    | 64    | 16    | 78    | 163   | 150   | 112   | 42    | 25    | 47    | 21    | 21    | 19    | 58    | 26    | 17    | 12    | 55    | 170   | 108   | 69    | 7     | 33    | 18    | Adh7    |      |
| Adhfe1  | 116   | 124   | 69    | 114   | 129   | 136   | 125   | 115   | 125   | 102   | 120   | 28    | 43    | 36    | 111   | 132   | 67    | 151   | 86    | 101   | 119   | 125   | 116   | 79    | 52    | 46    | 45    | 36    | Adhfe1  |      |
| Adi1    | 871   | 613   | 708   | 560   | 573   | 631   | 1396  | 1396  | 1384  | 1325  | 1249  | 1287  | 1405  | 1396  | 662   | 711   | 590   | 573   | 627   | 575   | 654   | 1151  | 1427  | 1479  | 1292  | 1958  | 1319  | 1525  | Adi1    |      |
| Adig    | 5     | 7     | 8     | 7     | 8     | 5     | 2     | 0     | 4     | 0     | 6     | 0     | 5     | 3     | 4     | 3     | 9     | 11    | 10    | 6     | 4     | 2     | 5     | 2     | 0     | 2     | 10    | 4     | Adig    |      |
| Adipoq  | 3     | 3     | 0     | 1     | 4     | 3     | 2     | 5     | 3     | 0     | 1     | 0     | 0     | 4     | 5     | 2     | 5     | 0     | 0     | 0     | 0     | 3     | 9     | 2     | 0     | 2     | 2     | 4     | Adipoq  |      |
| Adipor1 | 6091  | 6643  | 6350  | 6536  | 5645  | 5712  | 5611  | 4726  | 4823  | 4658  | 5199  | 4701  | 5530  | 5058  | 5690  | 6420  | 6351  | 6417  | 5685  | 5416  | 5728  | 4547  | 5192  | 4811  | 4796  | 5043  | 4923  | 5365  | Adipor1 |      |
| Adipor2 | 10492 | 11980 | 11361 | 12182 | 10321 | 10523 | 10644 | 7424  | 6863  | 7238  | 7182  | 7782  | 7353  | 7744  | 10589 | 10684 | 11333 | 11999 | 11187 | 10186 | 11124 | 7215  | 6996  | 7723  | 7756  | 7645  | 7936  | 8464  | Adipor2 |      |
| Adk     | 4866  | 3723  | 4364  | 3125  | 2819  | 3279  | 3985  | 3010  | 2880  | 2298  | 2446  | 2999  | 2969  | 3583  | 4432  | 4210  | 3505  | 3335  | 3350  | 4212  | 3478  | 1838  | 2687  | 2938  | 2515  | 3824  | 3127  | 3489  | Adk     |      |
| Adm     | 98    | 109   | 99    | 85    | 128   | 134   | 115   | 73    | 87    | 70    | 87    | 56    | 52    | 79    | 75    | 121   | 141   | 111   | 118   | 132   | 101   | 72    | 99    | 70    | 114   | 76    | 51    | 81    | Adm     |      |
| Adm2    | 2     | 3     | 0     | 0     | 0     | 0     | 4     | 1     | 2     | 0     | 0     | 4     | 0     | 4     | 0     | 5     | 0     | 4     | 1     | 0     | 0     | 0     | 1     | 0     | 1     | 0     | 3     | 3     | 1       | Adm2 |
| Adnp    | 225   | 226   | 156   | 157   | 205   | 185   | 127   | 338   | 351   | 269   | 288   | 291   | 299   | 256   | 173   | 181   | 159   | 142   | 194   | 222   | 148   | 247   | 276   | 300   | 337   | 217   | 313   | 233   | Adnp    |      |
| Adnp2   | 4116  | 4156  | 4414  | 4160  | 3800  | 3451  | 3848  | 3251  | 3310  | 3549  | 3125  | 3926  | 3724  | 3704  | 3572  | 3798  | 4117  | 4010  | 4004  | 3693  | 3724  | 3380  | 3088  | 3443  | 3326  | 3912  | 3833  | 3916  | Adnp2   |      |
| Ado     | 0     | 0     | 0     | 0     | 0     | 0     | 0     | 0     | 0     | 0     | 1     | 0     | 0     | 0     | 0     | 0     | 0     | 0     | 0     | 0     | 0     | 0     | 0     | 0     | 0     | 0     | 0     | 0     | Ado     |      |
| Adora1  | 250   | 307   | 213   | 441   | 1012  | 667   | 586   | 391   | 566   | 618   | 601   | 260   | 252   | 237   | 302   | 258   | 227   | 638   | 643   | 524   | 667   | 675   | 518   | 381   | 638   | 222   | 149   | 131   | Adora1  |      |
| Adora2a | 163   | 221   | 268   | 288   | 313   | 239   | 274   | 287   | 280   | 313   | 413   | 304   | 290   | 319   | 186   | 204   | 294   | 297   | 351   | 217   | 271   | 341   | 340   | 403   | 409   | 392   | 325   | 272   | Adora2a |      |
| Adora2b | 316   | 265   | 257   | 169   | 171   | 202   | 122   | 160   | 188   | 148   | 205   | 109   | 164   | 139   | 215   | 301   | 209   | 190   | 181   | 176   | 122   | 125   | 260   | 192   | 135   | 206   | 128   | 152   | Adora2b |      |
| Adora3  | 1     | 6     | 0     | 0     | 7     | 4     | 2     | 7     | 11    | 12    | 6     | 4     | 6     | 5     | 0     | 3     | 3     | 7     | 0     | 1     | 2     | 2     | 9     | 7     | 0     | 6     | 1     | 2     | Adora3  |      |
| Adoga   | 4151  | 4027  | 4555  | 4036  | 3548  | 3657  | 3463  | 3003  | 3143  | 2998  | 3602  | 3568  | 3839  | 3474  | 4187  | 4469  | 3999  | 4030  | 3634  | 3324  | 3532  | 3108  | 3133  | 3459  | 3224  | 3673  | 3571  | 3525  | Adoga   |      |
| Adprh   | 4929  | 5616  | 6650  | 5599  | 5433  | 4953  | 5068  | 4818  | 5596  | 6039  | 5690  | 6453  | 6256  | 6497  | 4846  | 5203  | 6398  | 5168  | 5674  | 4578  | 5010  | 5618  | 5622  | 6275  | 6122  | 7272  | 5739  | 6867  | Adprh   |      |
| Adprh1  | 2     | 10    | 1     | 6     | 2     | 9     | 3     | 9     | 18    | 4     | 36    | 3     | 5     | 2     | 8     | 2     | 2     | 0     | 5     | 4     | 1     | 2     | 32    | 2     | 5     | 8     | 3     | 2     | Adprh1  |      |
| Adprm   | 1215  | 1266  | 1330  | 1249  | 1268  | 1168  | 1265  | 1602  | 1355  | 1391  | 1380  | 1334  | 1458  | 1553  | 1334  | 1125  | 1389  | 1122  | 1281  | 1363  | 1268  | 1420  | 1425  | 1520  | 1351  | 1541  | 1460  | 1511  | Adprm   |      |
| Adprs   | 1564  | 1871  | 1912  | 1825  | 1572  | 1695  | 1463  | 2066  | 2472  | 2228  | 2230  | 2386  | 2138  | 2059  | 1491  | 1693  | 1808  | 1751  | 1778  | 1652  | 1525  | 1995  | 2464  | 2424  | 2164  | 2764  | 2085  | 2012  | Adprs   |      |
| Adra1a  | 416   | 509   | 210   | 326   | 551   | 655   | 396   | 399   | 317   | 221   | 269   | 273   | 486   | 269   | 500   | 483   | 299   | 292   | 387   | 635   | 508   | 199   | 285   | 133   | 313   | 62    | 352   | 223   | Adra1a  |      |
| Adra1b  | 48    | 46    | 56    | 29    | 81    | 52    | 34    | 95    | 112   | 172   | 133   | 100   | 98    | 60    | 57    | 51    | 37    | 55    | 39    | 30    | 46    | 132   | 124   | 109   | 98    | 85    | 70    | 58    | Adra1b  |      |
| Adra1d  | 38    | 18    | 60    | 20    | 26    | 18    | 10    | 13    | 21    | 16    | 34    | 14    | 23    | 3     | 16    | 40    | 36    | 25    | 28    | 9     | 12    | 12    | 38    | 8     | 19    | 13    | 14    | 1     | Adra1d  |      |
| Adra2a  | 433   | 466   | 541   | 573   | 811   | 618   | 489   | 818   | 839   | 1207  | 1004  | 926   | 854   | 891   | 462   | 491   | 510   | 523   | 586   | 446   | 455   | 1019  | 1052  | 1065  | 930   | 1161  | 843   | 917   | Adra2a  |      |
| Adra2b  | 62    | 112   | 114   | 57    | 39    | 41    | 29    | 10    | 18    | 12    | 30    | 70    | 112   | 92    | 113   | 152   | 79    | 30    | 23    | 28    | 27    | 18    | 27    | 4     | 8     | 81    | 58    | 250   | Adra2b  |      |
| Adra2c  | 45    | 51    | 31    | 63    | 153   | 89    | 63    | 85    | 76    | 65    | 51    | 35    | 26    | 33    | 50    | 51    | 75    | 88    | 93    | 73    | 76    | 94    | 89    | 80    | 108   | 27    | 17    | 18    | Adra2c  |      |
| Adrb1   | 185   | 188   | 186   | 235   | 206   | 214   | 204   | 66    | 76    | 74    | 81    | 72    | 49    | 60    | 169   | 163   | 192   | 206   | 226   | 188   | 234   | 80    | 92    | 101   | 60    | 111   | 37    | 51    | Adrb1   |      |
| Adrb2   | 116   | 140   | 152   | 77    | 65    | 106   | 58    | 56    | 106   | 42    | 63    | 54    | 118   | 63    | 102   | 170   | 108   | 110   | 52    | 106   | 71    | 60    | 106   | 51    | 47    | 85    | 45    | 93    | Adrb2   |      |
| Adrb3   | 70    | 117   | 80    | 46    | 34    | 44    | 35    | 15    | 28    | 14    | 21    | 22    | 33    | 13    | 59    | 105   | 73    | 67    | 41    | 40    | 40    | 30    | 30    | 14    | 15    | 4     | 7     | 13    | Adrb3   |      |
| Adrm1   | 4184  | 5056  | 5503  | 5118  | 4662  | 4415  | 4132  | 3705  | 4148  | 4415  | 4288  | 5111  | 4538  | 4694  | 3898  | 4251  | 5443  | 4918  | 5398  | 4064  | 4426  | 4253  | 3965  | 4807  | 4670  | 6058  | 4907  | 4991  | Adrm1   |      |
| Adsl    | 3217  | 3720  | 3679  | 3043  | 2453  | 2886  | 2789  | 2882  | 3170  | 2812  | 3024  | 3480  | 3316  | 2629  | 2825  | 3185  | 3110  | 2839  | 2877  | 2837  | 2599  | 2608  | 3325  | 3261  | 2787  | 4735  | 3853  | 3731  | Adsl    |      |
| Adsss   | 12370 | 9403  | 11066 | 9598  | 10245 | 10723 | 11605 | 9191  | 8339  | 7317  | 7469  | 8149  | 8056  | 8354  | 12775 | 11180 | 9922  | 9702  | 10016 | 11723 | 11026 | 7865  | 8406  | 7397  | 7380  | 8734  | 8870  | 8759  | Adsss   |      |
| Adssl1  | 96    | 120   | 8     |       |       |       |       |       |       |       |       |       |       |       |       |       |       |       |       |       |       |       |       |       |       |       |       |       |         |      |

|          |       |       |       |       |       |       |       |       |       |       |       |       |       |       |       |       |       |       |       |       |       |       |       |       |       |       |       |       |            |
|----------|-------|-------|-------|-------|-------|-------|-------|-------|-------|-------|-------|-------|-------|-------|-------|-------|-------|-------|-------|-------|-------|-------|-------|-------|-------|-------|-------|-------|------------|
| Agbl3    | 713   | 441   | 484   | 556   | 702   | 697   | 792   | 832   | 852   | 886   | 776   | 876   | 741   | 827   | 724   | 657   | 484   | 634   | 629   | 842   | 777   | 884   | 872   | 797   | 718   | 665   | 782   | 717   | Agbl3      |
| Agbl4    | 108   | 115   | 80    | 111   | 102   | 152   | 142   | 128   | 102   | 56    | 80    | 71    | 129   | 70    | 140   | 118   | 96    | 99    | 99    | 152   | 155   | 105   | 116   | 77    | 68    | 85    | 93    | 101   | Agbl4      |
| Agbl5    | 2834  | 3113  | 3256  | 3324  | 3832  | 3253  | 3390  | 4273  | 4870  | 5393  | 4949  | 5545  | 5202  | 5213  | 2654  | 2709  | 3631  | 3187  | 3837  | 3060  | 3443  | 5384  | 4480  | 5431  | 5792  | 5086  | 4960  | 4995  | Agbl5      |
| Ager     | 369   | 455   | 496   | 450   | 491   | 400   | 439   | 316   | 342   | 357   | 332   | 481   | 465   | 405   | 331   | 418   | 512   | 483   | 512   | 394   | 386   | 396   | 273   | 455   | 368   | 586   | 424   | 440   | Ager       |
| Agfg1    | 14020 | 11430 | 10286 | 11566 | 12616 | 13287 | 14122 | 11574 | 10159 | 8878  | 8761  | 9190  | 8955  | 9558  | 14652 | 12784 | 10741 | 11755 | 11610 | 14364 | 13626 | 9929  | 9537  | 8450  | 10159 | 7785  | 9178  | 9196  | Agfg1      |
| Agfg2    | 3149  | 4089  | 3742  | 3903  | 2539  | 2991  | 2995  | 1165  | 1290  | 1360  | 1112  | 1685  | 1506  | 1504  | 3003  | 3518  | 3605  | 3548  | 2801  | 2906  | 2881  | 1235  | 1182  | 1481  | 1375  | 1912  | 1680  | 1746  | Agfg2      |
| Aggl1    | 6854  | 7503  | 7979  | 7885  | 6650  | 7268  | 7840  | 5625  | 5324  | 5620  | 5403  | 6650  | 6199  | 6509  | 6940  | 6869  | 7840  | 7574  | 7271  | 7372  | 7258  | 5329  | 5344  | 6274  | 6231  | 6881  | 6720  | 6806  | Aggl1      |
| Agk      | 956   | 959   | 956   | 856   | 1100  | 1029  | 1076  | 1769  | 1970  | 1591  | 1817  | 1778  | 1645  | 1735  | 953   | 907   | 951   | 978   | 1139  | 1101  | 932   | 1678  | 1885  | 1709  | 1666  | 1828  | 1807  | 1659  | Agk        |
| AgL      | 8298  | 7649  | 5692  | 7641  | 7684  | 8280  | 8209  | 6064  | 6034  | 5487  | 6562  | 5867  | 6032  | 5588  | 8327  | 7538  | 6780  | 7401  | 7246  | 8055  | 8242  | 5726  | 6237  | 4847  | 5676  | 4366  | 6020  | 5565  | AgL        |
| Agmat    | 0     | 1     | 1     | 0     | 1     | 0     | 0     | 0     | 4     | 0     | 0     | 0     | 0     | 2     | 0     | 3     | 1     | 0     | 0     | 0     | 0     | 2     | 5     | 1     | 0     | 0     | 0     | 0     | Agmat      |
| Agmo     | 17    | 15    | 9     | 15    | 34    | 27    | 10    | 24    | 34    | 35    | 28    | 14    | 23    | 13    | 12    | 21    | 12    | 14    | 13    | 36    | 13    | 27    | 47    | 19    | 23    | 22    | 16    | 21    | Agmo       |
| Ago1     | 21176 | 21870 | 24315 | 26991 | 27803 | 27819 | 28927 | 25368 | 22649 | 28174 | 24000 | 40453 | 35578 | 38395 | 12151 | 20034 | 27063 | 26027 | 29418 | 23184 | 28150 | 29731 | 20853 | 31545 | 34313 | 26485 | 39094 | 40282 | Ago1       |
| Ago2     | 11468 | 11710 | 12405 | 14007 | 15252 | 14590 | 14717 | 9879  | 11182 | 12324 | 13977 | 14122 | 12990 | 14160 | 9928  | 12141 | 12617 | 13848 | 13866 | 10728 | 14179 | 11488 | 10411 | 11302 | 12873 | 11114 | 13503 | 13306 | Ago2       |
| Ago3     | 7969  | 7330  | 4836  | 6624  | 6273  | 8120  | 7727  | 5119  | 4694  | 4056  | 4362  | 3976  | 4048  | 4317  | 7770  | 8276  | 5388  | 6834  | 5808  | 7882  | 8744  | 3975  | 4383  | 3363  | 4280  | 2629  | 4408  | 3685  | Ago3       |
| Ago4     | 2744  | 2712  | 2513  | 3292  | 3881  | 3557  | 3658  | 3659  | 3377  | 3796  | 3090  | 3140  | 2829  | 2978  | 2831  | 2594  | 3114  | 3365  | 3620  | 3580  | 3714  | 4219  | 3056  | 3313  | 4070  | 2065  | 2957  | 2605  | Ago4       |
| Agpat1   | 5855  | 8558  | 7930  | 8128  | 7283  | 6993  | 7011  | 4476  | 5156  | 5589  | 5060  | 5996  | 5311  | 5512  | 5785  | 7055  | 8522  | 7936  | 7741  | 6390  | 7185  | 5479  | 4882  | 5875  | 5564  | 6057  | 5231  | 5622  | Agpat1     |
| Agpat2   | 112   | 147   | 188   | 79    | 97    | 146   | 73    | 250   | 303   | 200   | 284   | 193   | 257   | 164   | 145   | 181   | 108   | 122   | 102   | 88    | 71    | 219   | 377   | 230   | 172   | 273   | 229   | 197   | Agpat2     |
| Agpat3   | 2734  | 3220  | 2984  | 3820  | 4835  | 3931  | 4286  | 4840  | 5501  | 5919  | 5692  | 5248  | 4747  | 5674  | 2970  | 2527  | 3453  | 3765  | 4568  | 3844  | 4564  | 5477  | 5466  | 5873  | 6202  | 5038  | 4974  | 5357  | Agpat3     |
| Agpat4   | 1774  | 2476  | 2258  | 2005  | 2042  | 1864  | 1707  | 1877  | 1917  | 2050  | 1877  | 2011  | 2161  | 1852  | 1800  | 2189  | 2110  | 1946  | 2187  | 1996  | 1798  | 1868  | 2093  | 1906  | 2130  | 2244  | 2091  | 2026  | Agpat4     |
| Agpat5   | 5301  | 4959  | 5115  | 6341  | 6037  | 5842  | 6440  | 4803  | 4115  | 4206  | 4167  | 3965  | 3787  | 4156  | 6103  | 5264  | 5604  | 6189  | 6086  | 6439  | 6184  | 4712  | 4177  | 4217  | 4516  | 4131  | 4043  | 3900  | Agpat5     |
| Agps     | 12974 | 9244  | 10605 | 8750  | 9205  | 9818  | 9243  | 10360 | 9266  | 8220  | 9195  | 9481  | 10016 | 9404  | 12580 | 12244 | 9398  | 8961  | 8412  | 9070  | 8765  | 8918  | 9652  | 8139  | 8333  | 8114  | 9976  | 9731  | Agps       |
| Agr2     | 3     | 4     | 0     | 6     | 1     | 4     | 3     | 7     | 8     | 3     | 9     | 2     | 2     | 1     | 0     | 4     | 8     | 0     | 2     | 2     | 1     | 5     | 12    | 10    | 4     | 0     | 4     | 0     | Agr2       |
| Agr3     | 22    | 6     | 0     | 11    | 0     | 0     | 0     | 46    | 33    | 30    | 46    | 2     | 14    | 4     | 17    | 7     | 2     | 0     | 0     | 0     | 1     | 22    | 41    | 44    | 8     | 64    | 2     | 1     | Agr3       |
| Agrn     | 41303 | 53980 | 54794 | 61923 | 62404 | 56823 | 49910 | 39346 | 45374 | 52753 | 47621 | 57315 | 55651 | 48439 | 42288 | 51007 | 62644 | 63301 | 62782 | 45675 | 52707 | 56972 | 41328 | 53333 | 54363 | 68134 | 51276 | 48562 | Agrn       |
| Agrr     | 6     | 8     | 8     | 5     | 9     | 6     | 2     | 12    | 16    | 16    | 25    | 9     | 8     | 15    | 5     | 12    | 2     | 1     | 4     | 13    | 5     | 18    | 16    | 26    | 17    | 14    | 10    | 12    | Agrr       |
| Agst     | 1     | 2     | 0     | 4     | 4     | 0     | 1     | 0     | 14    | 8     | 16    | 2     | 14    | 0     | 4     | 4     | 0     | 0     | 4     | 0     | 0     | 8     | 8     | 0     | 5     | 0     | 0     | 1     | Agst       |
| Agtpbpb1 | 6739  | 7066  | 4327  | 7010  | 9067  | 8295  | 9269  | 7584  | 7420  | 6681  | 7071  | 5775  | 5693  | 5959  | 7710  | 6720  | 5696  | 8041  | 7559  | 8915  | 9275  | 7478  | 6967  | 5363  | 7753  | 3563  | 5753  | 5034  | Agtpbpb1   |
| Agtr1a   | 384   | 308   | 400   | 232   | 175   | 242   | 180   | 137   | 136   | 185   | 229   | 155   | 269   | 186   | 314   | 399   | 247   | 257   | 169   | 118   | 153   | 154   | 211   | 137   | 108   | 174   | 248   | 174   | Agtr1a     |
| Agtr1b   | 0     | 4     | 0     | 0     | 11    | 4     | 0     | 0     | 2     | 3     | 24    | 0     | 0     | 0     | 4     | 6     | 2     | 0     | 2     | 1     | 0     | 8     | 6     | 0     | 9     | 2     | 0     | 1     | Agtr1b     |
| Agtr2    | 386   | 173   | 101   | 135   | 218   | 374   | 115   | 752   | 2456  | 899   | 4654  | 153   | 607   | 154   | 355   | 333   | 123   | 295   | 298   | 153   | 92    | 1444  | 4223  | 473   | 591   | 269   | 188   | 150   | Agtr2      |
| Agtrap   | 2320  | 2496  | 3321  | 2558  | 2008  | 1951  | 1933  | 839   | 968   | 871   | 1118  | 1072  | 1209  | 1140  | 2265  | 2576  | 2765  | 2275  | 2175  | 1844  | 1896  | 805   | 1087  | 974   | 894   | 1436  | 1206  | 1169  | Agtrap     |
| Agxt     | 0     | 0     | 0     | 0     | 0     | 0     | 0     | 0     | 0     | 0     | 0     | 0     | 0     | 0     | 0     | 0     | 1     | 0     | 0     | 0     | 0     | 0     | 0     | 0     | 0     | 0     | 0     | 0     | Agxt       |
| Agxt2    | 0     | 0     | 0     | 0     | 0     | 1     | 0     | 0     | 0     | 0     | 0     | 0     | 0     | 0     | 0     | 0     | 0     | 0     | 0     | 0     | 0     | 0     | 0     | 0     | 0     | 0     | 0     | 0     | Agxt2      |
| Ahctf1   | 14451 | 12816 | 8194  | 9809  | 9578  | 12100 | 11521 | 14097 | 12307 | 10088 | 10936 | 12117 | 11780 | 12314 | 13767 | 12591 | 9009  | 9762  | 9626  | 12542 | 11303 | 9519  | 11690 | 9226  | 10698 | 8228  | 13233 | 11345 | Ahctf1     |
| Ahcy     | 7545  | 7565  | 7694  | 4892  | 3918  | 4816  | 4132  | 5525  | 6155  | 4792  | 4881  | 6402  | 6055  | 5829  | 6090  | 7034  | 5990  | 4309  | 5090  | 4925  | 4299  | 4080  | 5891  | 5454  | 5040  | 8273  | 7197  | 6941  | Ahcy       |
| Ahcy1    | 20458 | 17113 | 17979 | 19019 | 19751 | 19503 | 21210 | 19468 | 16796 | 17250 | 16720 | 18616 | 17759 | 19700 | 20376 | 17406 | 18294 | 18901 | 18834 | 19111 | 20788 | 18372 | 17046 | 17637 | 18491 | 17861 | 19500 | 19306 | Ahcy1      |
| Ahcy2    | 5881  | 5356  | 5379  | 5293  | 5623  | 5699  | 5839  | 3915  | 3564  | 3800  | 3709  | 3579  | 4009  | 3680  | 5388  | 5583  | 5621  | 5515  | 5496  | 4991  | 5638  | 4365  | 3730  | 3458  | 3460  | 3564  | 3333  | 3761  | Ahcy2      |
| Ahcd1    | 2709  | 3891  | 4147  | 4560  | 4975  | 3840  | 3302  | 2771  | 3621  | 4370  | 4322  | 3551  | 3251  | 2994  | 2544  | 3568  | 4661  | 4916  | 4848  | 3150  | 3677  | 4684  | 3770  | 4198  | 4448  | 3900  | 3001  | 2924  | Ahcd1      |
| Ah1      | 10944 | 11471 | 8701  | 13544 | 14557 | 13930 | 15100 | 10343 | 8938  | 9105  | 7268  | 7234  | 5745  | 7632  | 11939 | 9302  | 10364 | 14045 | 14544 | 15000 | 15411 | 11344 | 8336  | 8008  | 9960  | 5657  | 6839  | 6585  | Ah1        |
| Ahnak    | 7931  | 6319  | 4689  | 3348  | 3025  | 6435  | 2272  | 16055 | 20286 | 12795 | 20881 | 9751  | 14247 | 10314 | 7228  | 8049  | 3529  | 4933  | 2424  | 3353  | 2744  | 9969  | 23484 | 11105 | 10446 | 7181  | 12459 | 10439 | Ahnak      |
| Ahr      | 984   | 916   | 773   | 811   | 700   | 698   | 584   | 850   | 1083  | 776   | 1137  | 463   | 604   | 471   | 938   | 1298  | 578   | 974   | 465   | 616   | 568   | 792   | 1263  | 561   | 493   | 413   | 381   | 436   | Ahr        |
| Ahrr     | 116   | 83    | 78    | 64    | 130   | 125   | 106   | 303   | 350   | 285   | 263   | 373   | 336   | 333   | 127   | 93    | 95    | 76    | 111   | 119   | 115   | 204   | 265   | 240   | 238   | 300   | 364   | 335   | Ahrr       |
| Ahsa1    | 6211  | 6643  | 6738  | 5901  | 5308  | 5038  | 5776  | 6009  | 5718  | 5578  | 5384  | 5734  | 5482  | 6009  | 6128  | 6179  | 6362  | 5647  | 5916  | 6108  | 5546  | 5375  | 5921  | 5880  | 5217  | 6588  | 5767  | 6164  | Ahsa1      |
| Ahsa2    | 7128  | 6286  | 6550  | 7260  | 8362  | 8071  | 9332  | 10761 | 8686  | 9348  | 8732  | 10452 | 8370  | 10499 | 9302  | 6225  | 7599  | 7221  | 8345  | 8923  | 8951  | 10537 | 8512  | 9523  | 10114 | 9580  | 9265  | 9920  | Ahsa2      |
| Ahsg     | 1     | 3     | 0     | 0     | 0     | 0     | 2     | 4     | 4     | 0     | 10    | 3     | 0     | 5     | 3     | 2     | 0     | 0     | 0     | 3     | 0     | 0     | 5     | 2     | 2     | 2     | 1     | 4     | Ahsg       |
| AI182371 | 35    | 29    | 30    | 44    | 62    | 49    | 46    | 54    | 78    | 81    | 77    | 66    | 77    | 68    | 55    | 39    | 32    | 35    | 58    | 39    | 53    | 77    | 69    | 69    | 57    | 82    | 71    | 68    | AI182371   |
| AI413582 | 705   | 941   | 849   | 1020  | 848   | 780   | 771   | 305   | 335   | 362   | 324   | 278   | 379   | 284   | 781   | 880   | 976   | 928   | 824   | 871   | 806   | 314   | 361   | 327   | 309   | 324   | 281   | 258   | AI413582   |
| AI429214 | 438   | 450   | 399   | 440   | 407   | 337   | 448   | 330   | 297   | 349   | 251   | 275   | 306   | 289   | 468   | 445   | 476   | 371   | 365   | 482   | 446   | 322   | 314   | 279   | 307   | 341   | 272   | 286   | AI429214   |
| AI467606 | 42    | 35    | 37    | 26    | 25    | 45    | 30    | 78    | 73    | 93    | 88    | 53    | 51    | 35    | 36    | 40    | 44    | 41    | 28    | 42    | 38    | 87    | 101   | 46    | 48    | 48    | 49    | 38    | AI467606</ |

|         |       |       |       |       |       |       |       |       |       |       |       |       |       |       |       |       |       |       |       |       |       |       |       |       |       |       |       |       |         |        |
|---------|-------|-------|-------|-------|-------|-------|-------|-------|-------|-------|-------|-------|-------|-------|-------|-------|-------|-------|-------|-------|-------|-------|-------|-------|-------|-------|-------|-------|---------|--------|
| Ak7     | 231   | 343   | 210   | 381   | 457   | 406   | 348   | 264   | 261   | 297   | 204   | 345   | 381   | 165   | 305   | 446   | 284   | 360   | 323   | 356   | 375   | 399   | 441   | 194   | 250   | 152   | 200   | 159   | Ak7     |        |
| Ak8     | 39    | 46    | 24    | 41    | 37    | 36    | 36    | 51    | 59    | 46    | 43    | 47    | 56    | 30    | 54    | 64    | 39    | 25    | 39    | 39    | 57    | 53    | 75    | 49    | 35    | 45    | 35    | 36    | Ak8     |        |
| Ak9     | 54    | 68    | 41    | 36    | 71    | 65    | 40    | 114   | 82    | 70    | 63    | 98    | 134   | 42    | 58    | 83    | 28    | 55    | 43    | 65    | 54    | 89    | 144   | 56    | 51    | 43    | 55    | 33    | Ak9     |        |
| Akain1  | 15    | 16    | 34    | 41    | 36    | 21    | 31    | 15    | 9     | 6     | 15    | 8     | 5     | 3     | 24    | 31    | 23    | 34    | 35    | 29    | 36    | 15    | 16    | 5     | 7     | 2     | 1     | 1     | Akain1  |        |
| Akap1   | 5707  | 6632  | 6315  | 7522  | 6958  | 6893  | 6673  | 3138  | 3591  | 4132  | 3815  | 3981  | 3743  | 3901  | 5851  | 5849  | 6657  | 7471  | 7267  | 6126  | 6868  | 4044  | 3429  | 4193  | 4335  | 3625  | 3946  | 3858  | Akap1   |        |
| Akap10  | 1615  | 1340  | 1187  | 1353  | 1430  | 1531  | 1576  | 2447  | 2268  | 2203  | 2320  | 2149  | 1934  | 2121  | 1538  | 1421  | 1292  | 1297  | 1283  | 1477  | 1590  | 2003  | 2333  | 1977  | 2246  | 1666  | 2220  | 2071  | Akap10  |        |
| Akap11  | 20767 | 18289 | 10818 | 16221 | 17722 | 20731 | 20496 | 21366 | 18465 | 14467 | 15368 | 14831 | 14632 | 15604 | 21441 | 18806 | 12660 | 15483 | 15610 | 21802 | 20598 | 15321 | 17553 | 11485 | 16707 | 8566  | 15657 | 12977 | Akap11  |        |
| Akap12  | 19210 | 23437 | 21992 | 16078 | 12291 | 18954 | 7257  | 15536 | 18458 | 16036 | 21144 | 18252 | 24913 | 18227 | 24571 | 30626 | 15052 | 20164 | 8156  | 9888  | 7973  | 17981 | 24601 | 16493 | 16247 | 10931 | 20811 | 18112 | Akap12  |        |
| Akap13  | 6953  | 7315  | 4431  | 6865  | 7337  | 7682  | 7411  | 4956  | 5605  | 5137  | 6190  | 5300  | 5997  | 5282  | 6844  | 6977  | 5485  | 6804  | 6823  | 6467  | 8192  | 4166  | 5700  | 4119  | 4847  | 3212  | 5772  | 4789  | Akap13  |        |
| Akap14  | 5     | 10    | 2     | 13    | 13    | 3     | 9     | 11    | 13    | 11    | 8     | 14    | 23    | 6     | 4     | 6     | 1     | 2     | 9     | 6     | 6     | 20    | 26    | 2     | 14    | 8     | 3     | 8     | Akap14  |        |
| Akap17b | 2646  | 2515  | 2664  | 2998  | 3084  | 3281  | 3217  | 2352  | 1863  | 2231  | 1986  | 1947  | 2302  | 2108  | 2897  | 2669  | 2861  | 2797  | 2825  | 3034  | 3118  | 2550  | 1823  | 2052  | 2102  | 1526  | 2074  | 2032  | Akap17b |        |
| Akap3   | 22    | 14    | 8     | 19    | 16    | 22    | 21    | 12    | 12    | 17    | 15    | 20    | 19    | 13    | 22    | 22    | 13    | 8     | 21    | 20    | 14    | 12    | 14    | 2     | 12    | 9     | 22    | 7     | Akap3   |        |
| Akap4   | 0     | 2     | 0     | 0     | 0     | 0     | 0     | 0     | 1     | 0     | 0     | 0     | 0     | 0     | 0     | 0     | 0     | 0     | 0     | 0     | 0     | 2     | 0     | 0     | 0     | 0     | 0     | 0     | Akap4   |        |
| Akap5   | 1468  | 1550  | 1462  | 1907  | 2207  | 2065  | 2016  | 1264  | 1181  | 1229  | 1162  | 1120  | 1098  | 1220  | 1669  | 1493  | 1641  | 1755  | 1882  | 2025  | 2133  | 1527  | 1131  | 1143  | 1406  | 882   | 1132  | 1031  | Akap5   |        |
| Akap6   | 11284 | 13068 | 7510  | 12344 | 15514 | 14913 | 14698 | 15091 | 12505 | 11671 | 11635 | 10224 | 13013 | 11274 | 15813 | 12777 | 10871 | 11786 | 12599 | 15816 | 15313 | 13936 | 12062 | 8505  | 12758 | 5758  | 11767 | 10295 | Akap6   |        |
| Akap7   | 709   | 475   | 680   | 630   | 849   | 658   | 591   | 1436  | 1216  | 1207  | 1442  | 1184  | 1340  | 1305  | 723   | 695   | 541   | 584   | 553   | 607   | 600   | 1591  | 1337  | 1154  | 1269  | 1474  | 1201  | 1276  | Akap7   |        |
| Akap8   | 13625 | 13687 | 15320 | 15979 | 16376 | 15832 | 17118 | 18520 | 17206 | 19461 | 18596 | 20770 | 19605 | 22207 | 13448 | 12600 | 15712 | 16140 | 16480 | 15411 | 16613 | 19061 | 15827 | 20162 | 20656 | 19808 | 20798 | 20810 | Akap8   |        |
| Akap8l  | 8298  | 10523 | 9434  | 12179 | 11112 | 10327 | 10922 | 5886  | 6122  | 7467  | 6748  | 6811  | 6278  | 6315  | 8694  | 9532  | 11208 | 12120 | 11706 | 9549  | 11349 | 7782  | 5697  | 7204  | 7460  | 5565  | 6405  | 6022  | Akap8l  |        |
| Akap9   | 11708 | 10535 | 6198  | 9547  | 14017 | 16327 | 15094 | 35960 | 30764 | 26260 | 24642 | 24050 | 23161 | 26949 | 13092 | 10386 | 7934  | 10135 | 12043 | 18534 | 21867 | 23200 | 27606 | 19763 | 30301 | 13456 | 27674 | 20515 | Akap9   |        |
| Akip1   | 361   | 308   | 356   | 270   | 246   | 345   | 303   | 352   | 399   | 352   | 449   | 366   | 463   | 379   | 332   | 251   | 302   | 249   | 244   | 259   | 217   | 312   | 466   | 346   | 279   | 467   | 442   | 455   | Akip1   |        |
| Akirin1 | 10101 | 9272  | 9149  | 9491  | 8057  | 8238  | 9404  | 6923  | 5361  | 5134  | 4763  | 5868  | 5799  | 6270  | 10789 | 9517  | 9170  | 9037  | 8097  | 9892  | 8560  | 6246  | 5575  | 5581  | 5606  | 6419  | 6012  | 6788  | Akirin1 |        |
| Akirin2 | 6439  | 5174  | 6550  | 6642  | 6699  | 6098  | 6773  | 8570  | 6914  | 7671  | 6835  | 7838  | 6870  | 8022  | 6697  | 9136  | 6614  | 6299  | 7106  | 6600  | 7024  | 8467  | 7013  | 8092  | 8139  | 8732  | 7280  | 7956  | Akirin2 |        |
| Akna    | 2578  | 3549  | 4071  | 3963  | 3679  | 3255  | 3286  | 1778  | 2178  | 2565  | 2315  | 4173  | 2282  | 3402  | 2370  | 2763  | 4352  | 3893  | 4089  | 2574  | 3206  | 2259  | 1730  | 3646  | 2988  | 4125  | 2994  | 3064  | Akna    |        |
| Aknad1  | 12    | 8     | 8     | 7     | 1     | 4     | 0     | 29    | 37    | 12    | 186   | 4     | 19    | 6     | 5     | 17    | 0     | 1     | 0     | 3     | 3     | 25    | 129   | 16    | 2     | 11    | 16    | 2     | Aknad1  |        |
| Akp3    | 2     | 2     | 0     | 2     | 3     | 2     | 2     | 0     | 0     | 0     | 2     | 0     | 0     | 0     | 0     | 7     | 8     | 13    | 5     | 7     | 4     | 0     | 0     | 0     | 0     | 0     | 0     | 0     | Akp3    |        |
| Akr1a1  | 21534 | 22709 | 18138 | 18686 | 18623 | 19068 | 19750 | 20402 | 22177 | 19438 | 19261 | 18418 | 18764 | 18867 | 21228 | 20067 | 18056 | 19052 | 20437 | 20905 | 20235 | 18188 | 23014 | 19342 | 19318 | 22657 | 19029 | 20144 | Akr1a1  |        |
| Akr1b10 | 917   | 884   | 740   | 600   | 569   | 626   | 512   | 409   | 367   | 300   | 358   | 462   | 451   | 368   | 847   | 897   | 725   | 578   | 548   | 368   | 442   | 550   | 346   | 295   | 283   | 409   | 485   | 535   | Akr1b10 |        |
| Akr1b3  | 5319  | 6247  | 5404  | 4162  | 3395  | 3760  | 3358  | 3132  | 3624  | 2573  | 2926  | 3310  | 3464  | 3118  | 5093  | 6092  | 4758  | 3657  | 4054  | 4685  | 3341  | 2645  | 3625  | 2835  | 2711  | 4173  | 4064  | 3527  | Akr1b3  |        |
| Akr1b7  | 2     | 0     | 1     | 0     | 0     | 4     | 4     | 2     | 0     | 1     | 0     | 0     | 0     | 1     | 3     | 0     | 2     | 2     | 0     | 1     | 0     | 5     | 0     | 0     | 4     | 0     | 4     | 0     | 1       | Akr1b7 |
| Akr1b8  | 706   | 872   | 808   | 396   | 351   | 432   | 339   | 579   | 476   | 379   | 491   | 658   | 782   | 653   | 893   | 949   | 689   | 410   | 359   | 499   | 263   | 488   | 568   | 446   | 468   | 943   | 916   | 932   | Akr1b8  |        |
| Akr1c12 | 9     | 2     | 6     | 0     | 4     | 3     | 4     | 12    | 8     | 5     | 10    | 1     | 12    | 10    | 3     | 6     | 9     | 4     | 4     | 1     | 4     | 3     | 6     | 6     | 11    | 6     | 10    | 0     | Akr1c12 |        |
| Akr1c13 | 22    | 16    | 11    | 22    | 74    | 50    | 31    | 76    | 77    | 78    | 79    | 47    | 41    | 32    | 28    | 29    | 20    | 33    | 41    | 41    | 41    | 75    | 89    | 48    | 46    | 57    | 29    | 33    | Akr1c13 |        |
| Akr1c14 | 43    | 44    | 79    | 69    | 101   | 80    | 76    | 48    | 72    | 54    | 72    | 38    | 34    | 26    | 79    | 60    | 59    | 66    | 65    | 105   | 68    | 85    | 115   | 60    | 54    | 57    | 29    | 45    | Akr1c14 |        |
| Akr1c18 | 0     | 0     | 0     | 0     | 2     | 0     | 2     | 0     | 1     | 3     | 0     | 0     | 0     | 0     | 0     | 0     | 0     | 2     | 0     | 0     | 0     | 0     | 3     | 0     | 0     | 0     | 0     | 0     | Akr1c18 |        |
| Akr1c19 | 20    | 18    | 8     | 26    | 51    | 66    | 58    | 154   | 171   | 122   | 122   | 61    | 71    | 55    | 26    | 23    | 32    | 41    | 65    | 63    | 62    | 117   | 160   | 74    | 101   | 13    | 53    | 44    | Akr1c19 |        |
| Akr1c21 | 0     | 2     | 0     | 1     | 0     | 0     | 0     | 0     | 1     | 0     | 0     | 0     | 0     | 0     | 0     | 0     | 0     | 0     | 0     | 0     | 0     | 0     | 1     | 0     | 0     | 0     | 0     | 0     | Akr1c21 |        |
| Akr1c1  | 8     | 8     | 17    | 6     | 2     | 6     | 9     | 6     | 3     | 0     | 2     | 20    | 11    | 7     | 16    | 12    | 7     | 6     | 2     | 7     | 7     | 5     | 5     | 3     | 10    | 11    | 9     | 20    | Akr1c1  |        |
| Akr1d1  | 0     | 0     | 0     | 0     | 0     | 0     | 0     | 0     | 2     | 0     | 0     | 0     | 1     | 0     | 0     | 0     | 0     | 0     | 0     | 0     | 0     | 0     | 0     | 0     | 0     | 0     | 0     | 0     | Akr1d1  |        |
| Akr1e1  | 2521  | 2465  | 2654  | 2292  | 2324  | 2387  | 2335  | 2886  | 2456  | 2158  | 2132  | 2367  | 2793  | 2369  | 3270  | 2842  | 2596  | 2353  | 2236  | 2828  | 2324  | 2568  | 2808  | 2344  | 2309  | 2596  | 2838  | 2579  | Akr1e1  |        |
| Akr7a5  | 1939  | 2364  | 1889  | 1767  | 1423  | 1580  | 1484  | 1055  | 1239  | 1123  | 1181  | 1203  | 1328  | 1103  | 1766  | 1910  | 1946  | 1763  | 1680  | 1666  | 1560  | 917   | 1308  | 1294  | 1024  | 1565  | 1284  | 1284  | Akr7a5  |        |
| Akt1    | 11130 | 12766 | 13259 | 13612 | 14912 | 14017 | 12635 | 15591 | 18217 | 19763 | 18835 | 19943 | 18160 | 18337 | 10730 | 11567 | 14236 | 14187 | 15503 | 11798 | 13851 | 17483 | 18261 | 20040 | 20136 | 20901 | 18245 | 18509 | Akt1    |        |
| Akt1s1  | 1400  | 1647  | 1655  | 1558  | 1378  | 1280  | 1233  | 2864  | 3159  | 2930  | 2985  | 3080  | 2860  | 2903  | 1403  | 1372  | 1815  | 1428  | 1558  | 1334  | 1324  | 2780  | 3271  | 3516  | 3037  | 3668  | 3134  | 3072  | Akt1s1  |        |
| Akt2    | 3066  | 3587  | 3142  | 3357  | 3169  | 3342  | 2911  | 5505  | 7049  | 6744  | 7024  | 6900  | 6665  | 5982  | 2774  | 3250  | 3333  | 3219  | 3702  | 3033  | 3089  | 5944  | 7103  | 6857  | 6866  | 7205  | 6398  | 6259  | Akt2    |        |
| Akt3    | 10883 | 10316 | 8917  | 11236 | 13700 | 14120 | 14852 | 17824 | 15464 | 15151 | 13469 | 16026 | 14413 | 16644 | 12384 | 9650  | 10755 | 11683 | 12846 | 14655 | 15111 | 16188 | 14641 | 14001 | 17845 | 9931  | 16192 | 15040 | Akt3    |        |
| Aktip   | 6443  | 6847  | 6457  | 6718  | 5938  | 5781  | 6519  | 5266  | 3986  | 4219  | 3742  | 4340  | 4065  | 4767  | 7007  | 6362  | 6647  | 6421  | 6136  | 7321  | 6349  | 4451  | 4180  | 4408  | 4732  | 4504  | 4581  | 4664  | Aktip   |        |
| Alad    | 1866  | 2183  | 2003  | 1769  | 1588  | 1765  | 1609  | 1098  | 1441  | 1398  | 1426  | 1624  | 1627  | 1500  | 1652  | 2111  | 1931  | 1778  | 1848  | 1426  | 1524  | 1158  | 1363  | 1554  | 1387  | 1834  | 1611  | 1747  | Alad    |        |
| Alas1   | 2175  | 2484  | 2250  | 2199  | 2246  | 2131  | 1912  | 2236  | 2511  | 2399  | 2416  | 2382  | 2422  | 2257  | 2086  | 2367  | 2418  | 2188  | 2326  | 2151  | 2126  | 2257  | 2482  | 2425  | 2343  | 2583  | 2341  | 2392  | Alas1   |        |
| Alas2   | 1403  | 2496  | 1687  | 1291  | 794   | 1271  | 1646  | 1481  | 2897  | 1453  | 1222  | 1233  | 3882  | 1894  | 1733  | 1945  | 1130  | 1272  | 1615  | 2136  | 1073  | 926   | 3008  | 985   | 1581  | 1441  | 1599  | 3859  | Alas2   |        |
| Alb     | 0     | 1     | 4     | 0     | 6     | 1     | 2     | 60    | 63    | 0     | 9     | 0     | 0     | 4     | 11    | 9     | 0     | 3     | 3     | 0     | 2     | 39    | 8     | 7     | 0     | 0     | 2     | Alb   |         |        |
| Albfm1  | 6     | 3     | 6     | 3     | 2     | 10    | 1     | 2     | 1     | 1     | 4     | 0     | 2     | 4     | 3     | 9     | 2     | 5     | 0     | 3     | 0     | 1     |       |       |       |       |       |       |         |        |

|         |       |       |       |       |       |       |       |       |       |       |       |       |       |       |       |       |       |       |       |       |       |       |       |       |       |       |       |       |         |        |
|---------|-------|-------|-------|-------|-------|-------|-------|-------|-------|-------|-------|-------|-------|-------|-------|-------|-------|-------|-------|-------|-------|-------|-------|-------|-------|-------|-------|-------|---------|--------|
| Alg10b  | 15478 | 12006 | 12553 | 13036 | 14642 | 15613 | 16023 | 19718 | 16645 | 15817 | 16492 | 17973 | 17786 | 18793 | 16043 | 13549 | 13149 | 13625 | 13508 | 15624 | 15076 | 17597 | 16041 | 16053 | 17858 | 13734 | 18708 | 18573 | Alg10b  |        |
| Alg11   | 4666  | 3750  | 3326  | 3311  | 2933  | 3179  | 3263  | 4081  | 3761  | 3325  | 3560  | 3252  | 3449  | 3336  | 4340  | 4191  | 3006  | 3335  | 2648  | 3368  | 3238  | 3823  | 3850  | 3166  | 3227  | 3244  | 3611  | 3522  | Alg11   |        |
| Alg12   | 795   | 855   | 871   | 898   | 7293  | 829   | 710   | 782   | 985   | 838   | 974   | 981   | 985   | 810   | 678   | 811   | 891   | 815   | 818   | 648   | 689   | 754   | 891   | 973   | 927   | 958   | 938   | 832   | Alg12   |        |
| Alg13   | 5811  | 4596  | 4988  | 4628  | 3816  | 4519  | 5227  | 2331  | 2117  | 1919  | 2274  | 2607  | 2415  | 2607  | 5196  | 5288  | 4534  | 4709  | 4303  | 4246  | 4774  | 1922  | 1958  | 2486  | 2273  | 2688  | 2738  | 2741  | Alg13   |        |
| Alg14   | 1278  | 1216  | 1296  | 1089  | 1005  | 1034  | 1174  | 1237  | 1060  | 974   | 1134  | 1229  | 1308  | 1277  | 1290  | 1106  | 1204  | 1111  | 994   | 1273  | 1034  | 1156  | 1221  | 1130  | 977   | 1402  | 1282  | 1359  | Alg14   |        |
| Alg2    | 9202  | 9875  | 9129  | 13081 | 15700 | 14088 | 13017 | 12187 | 11661 | 14080 | 13075 | 11456 | 12922 | 10745 | 10624 | 9492  | 11098 | 13247 | 13814 | 12719 | 13688 | 16434 | 11172 | 11776 | 14656 | 10127 | 11167 | 10443 | Alg2    |        |
| Alg3    | 946   | 1076  | 843   | 852   | 778   | 778   | 813   | 996   | 1093  | 958   | 1044  | 1064  | 1186  | 1142  | 895   | 844   | 936   | 820   | 814   | 889   | 752   | 1008  | 1076  | 1114  | 1017  | 1314  | 1216  | 1167  | Alg3    |        |
| Alg5    | 1378  | 1148  | 1208  | 1196  | 1218  | 1116  | 1309  | 1627  | 1478  | 1283  | 1464  | 1434  | 1475  | 1413  | 1476  | 1301  | 1100  | 1203  | 1164  | 1405  | 1320  | 1377  | 1484  | 1350  | 1271  | 1496  | 1369  | 1413  | Alg5    |        |
| Alg6    | 122   | 86    | 77    | 52    | 74    | 41    | 37    | 155   | 87    | 130   | 200   | 58    | 98    | 153   | 124   | 249   | 107   | 79    | 107   | 94    | 53    | 105   | 139   | 153   | 83    | 165   | 222   | 97    | Alg6    |        |
| Alg8    | 1398  | 1174  | 1251  | 916   | 908   | 934   | 1016  | 1867  | 1804  | 1640  | 1812  | 2135  | 1871  | 2105  | 1184  | 1194  | 1119  | 920   | 970   | 1024  | 935   | 1521  | 1741  | 1757  | 1658  | 2323  | 1987  | 2092  | Alg8    |        |
| Alg9    | 1723  | 1732  | 1569  | 1680  | 1776  | 1699  | 1562  | 2236  | 2193  | 2043  | 2047  | 1899  | 1824  | 1818  | 1854  | 1692  | 1716  | 1520  | 1698  | 1624  | 1684  | 2481  | 2306  | 1933  | 2000  | 2001  | 2030  | 1867  | Alg9    |        |
| Alk     | 131   | 93    | 106   | 248   | 366   | 309   | 226   | 194   | 260   | 318   | 402   | 153   | 172   | 149   | 104   | 118   | 144   | 223   | 377   | 217   | 306   | 384   | 303   | 208   | 289   | 87    | 116   | 96    | Alk     |        |
| Alka1   | 6     | 0     | 4     | 0     | 0     | 0     | 6     | 0     | 1     | 0     | 0     | 0     | 0     | 0     | 3     | 1     | 0     | 2     | 2     | 2     | 0     | 0     | 1     | 2     | 2     | 3     | 5     | 4     | Alka1   |        |
| Alka2   | 99    | 51    | 63    | 26    | 10    | 37    | 11    | 84    | 98    | 71    | 78    | 62    | 74    | 43    | 50    | 123   | 35    | 17    | 5     | 17    | 9     | 35    | 110   | 78    | 18    | 204   | 36    | 74    | Alka2   |        |
| Alkbb1  | 2693  | 2286  | 2566  | 2560  | 2347  | 2376  | 2356  | 3375  | 3200  | 2992  | 3401  | 3731  | 3497  | 3428  | 2491  | 2287  | 2433  | 2250  | 2355  | 2316  | 2335  | 3182  | 3172  | 3311  | 3175  | 3403  | 3631  | 3246  | Alkbb1  |        |
| Alkbb2  | 315   | 398   | 448   | 392   | 355   | 350   | 350   | 210   | 280   | 229   | 257   | 336   | 325   | 274   | 284   | 322   | 357   | 365   | 406   | 367   | 315   | 254   | 268   | 331   | 279   | 376   | 291   | 294   | Alkbb2  |        |
| Alkbb3  | 772   | 655   | 478   | 540   | 531   | 546   | 591   | 1084  | 1123  | 892   | 950   | 986   | 949   | 966   | 708   | 655   | 550   | 545   | 563   | 676   | 605   | 810   | 1117  | 831   | 970   | 844   | 1016  | 932   | Alkbb3  |        |
| Alkbb4  | 926   | 1182  | 987   | 998   | 830   | 842   | 924   | 644   | 746   | 574   | 692   | 749   | 680   | 662   | 876   | 1058  | 983   | 876   | 920   | 939   | 777   | 702   | 640   | 724   | 746   | 846   | 857   | 738   | Alkbb4  |        |
| Alkbb5  | 8079  | 8255  | 9807  | 10251 | 7679  | 7539  | 7746  | 5621  | 5407  | 6711  | 6589  | 7790  | 6998  | 7308  | 7295  | 8195  | 10143 | 9782  | 8253  | 6481  | 7754  | 6520  | 5676  | 7408  | 6737  | 7865  | 6907  | 8002  | Alkbb5  |        |
| Alkbb6  | 1226  | 1637  | 1146  | 1284  | 1266  | 1184  | 1073  | 833   | 934   | 831   | 872   | 854   | 907   | 1004  | 1211  | 1465  | 1133  | 1491  | 1319  | 1329  | 1116  | 916   | 896   | 976   | 959   | 1084  | 1012  | 796   | Alkbb6  |        |
| Alkbb7  | 419   | 653   | 585   | 658   | 579   | 532   | 622   | 371   | 462   | 505   | 418   | 533   | 492   | 469   | 469   | 469   | 538   | 582   | 598   | 571   | 590   | 456   | 437   | 487   | 472   | 554   | 494   | 474   | Alkbb7  |        |
| Alkbb8  | 7683  | 6380  | 5510  | 6756  | 7864  | 8327  | 8674  | 9810  | 8202  | 7706  | 8010  | 8238  | 8130  | 8548  | 8130  | 6644  | 6161  | 7072  | 7367  | 8504  | 8327  | 8380  | 7857  | 7290  | 8781  | 5498  | 8516  | 8272  | Alkbb8  |        |
| Allc    | 0     | 1     | 0     | 1     | 0     | 2     | 0     | 0     | 3     | 0     | 4     | 4     | 0     | 0     | 0     | 0     | 0     | 0     | 0     | 1     | 4     | 0     | 1     | 0     | 0     | 0     | 0     | 1     | Allc    |        |
| Alms1   | 9130  | 7591  | 3336  | 4977  | 5259  | 6989  | 7271  | 6682  | 5370  | 3727  | 3981  | 4662  | 4332  | 4760  | 8847  | 7227  | 3613  | 4427  | 5157  | 8660  | 7063  | 2902  | 4916  | 3241  | 4007  | 2418  | 5306  | 4125  | Alms1   |        |
| Alox12  | 168   | 125   | 108   | 58    | 93    | 67    | 40    | 178   | 195   | 173   | 173   | 148   | 125   | 215   | 95    | 102   | 176   | 104   | 91    | 43    | 103   | 66    | 114   | 208   | 99    | 73    | 210   | 173   | 102     | Alox12 |
| Alox12b | 5     | 3     | 3     | 2     | 7     | 0     | 1     | 4     | 4     | 19    | 11    | 9     | 6     | 2     | 7     | 9     | 10    | 4     | 2     | 5     | 3     | 3     | 13    | 7     | 6     | 5     | 0     | 1     | Alox12b |        |
| Alox12e | 2     | 1     | 0     | 0     | 0     | 0     | 0     | 5     | 8     | 0     | 3     | 0     | 0     | 0     | 1     | 1     | 1     | 0     | 0     | 0     | 0     | 0     | 6     | 4     | 0     | 5     | 0     | 0     | Alox12e |        |
| Alox15  | 46    | 16    | 28    | 24    | 15    | 19    | 16    | 12    | 12    | 21    | 14    | 10    | 15    | 17    | 24    | 28    | 20    | 18    | 14    | 10    | 18    | 12    | 21    | 20    | 5     | 18    | 9     | 18    | Alox15  |        |
| Alox5   | 69    | 72    | 84    | 48    | 55    | 43    | 37    | 18    | 28    | 24    | 54    | 23    | 35    | 28    | 63    | 78    | 80    | 59    | 44    | 45    | 34    | 42    | 54    | 38    | 18    | 47    | 36    | 27    | Alox5   |        |
| Alox5ap | 83    | 116   | 92    | 76    | 106   | 79    | 108   | 98    | 109   | 80    | 131   | 73    | 91    | 101   | 140   | 130   | 79    | 129   | 66    | 92    | 85    | 114   | 154   | 121   | 93    | 138   | 121   | 107   | Alox5ap |        |
| Alox8   | 7     | 11    | 13    | 3     | 2     | 8     | 2     | 2     | 15    | 14    | 22    | 10    | 5     | 9     | 7     | 12    | 6     | 13    | 2     | 2     | 4     | 3     | 10    | 11    | 5     | 8     | 12    | 1     | Alox8   |        |
| Aloxe3  | 68    | 67    | 78    | 75    | 110   | 106   | 75    | 12    | 27    | 22    | 32    | 13    | 19    | 15    | 57    | 77    | 79    | 79    | 96    | 74    | 90    | 30    | 30    | 15    | 23    | 10    | 7     | 24    | Aloxe3  |        |
| Alpk1   | 738   | 725   | 455   | 571   | 650   | 776   | 822   | 689   | 798   | 727   | 704   | 818   | 668   | 830   | 577   | 632   | 534   | 752   | 628   | 852   | 773   | 503   | 858   | 644   | 692   | 481   | 809   | 602   | Alpk1   |        |
| Alpk2   | 3     | 10    | 13    | 8     | 1     | 5     | 1     | 22    | 46    | 9     | 210   | 14    | 34    | 9     | 7     | 8     | 3     | 6     | 0     | 14    | 3     | 40    | 139   | 14    | 14    | 8     | 9     | 4     | Alpk2   |        |
| Alpk3   | 23    | 22    | 43    | 30    | 47    | 27    | 35    | 53    | 115   | 38    | 627   | 43    | 96    | 29    | 21    | 40    | 16    | 42    | 48    | 28    | 35    | 95    | 356   | 41    | 21    | 41    | 15    | 39    | Alpk3   |        |
| Alpl    | 640   | 711   | 737   | 675   | 484   | 658   | 398   | 1015  | 1195  | 1183  | 865   | 1072  | 961   | 850   | 568   | 729   | 765   | 800   | 598   | 393   | 413   | 881   | 1000  | 1288  | 913   | 1143  | 906   | 862   | Alpl    |        |
| Als2    | 7996  | 8958  | 7271  | 6867  | 7744  | 7502  | 8149  | 4957  | 4606  | 4085  | 4740  | 5137  | 4948  | 5061  | 8372  | 8408  | 7619  | 8205  | 7821  | 8023  | 8466  | 4888  | 4664  | 4557  | 5190  | 3176  | 5165  | 5003  | Als2    |        |
| Als2cl  | 422   | 456   | 601   | 383   | 454   | 458   | 304   | 228   | 373   | 414   | 320   | 328   | 277   | 234   | 392   | 597   | 474   | 525   | 400   | 247   | 332   | 312   | 324   | 306   | 218   | 314   | 260   | 206   | Als2cl  |        |
| Alx1    | 2128  | 626   | 880   | 510   | 74    | 231   | 57    | 2886  | 1473  | 1882  | 727   | 926   | 1088  | 847   | 936   | 1604  | 521   | 373   | 48    | 75    | 55    | 219   | 1352  | 2271  | 472   | 3442  | 797   | 1118  | Alx1    |        |
| Alx3    | 392   | 244   | 266   | 200   | 78    | 134   | 69    | 462   | 292   | 344   | 200   | 299   | 370   | 312   | 278   | 437   | 145   | 143   | 72    | 81    | 80    | 74    | 326   | 443   | 178   | 861   | 277   | 344   | Alx3    |        |
| Alx4    | 2392  | 1589  | 2197  | 1044  | 386   | 1002  | 280   | 3886  | 3454  | 3874  | 2976  | 3263  | 4276  | 2961  | 1593  | 2397  | 1254  | 989   | 321   | 369   | 256   | 2401  | 3224  | 4296  | 2105  | 5265  | 3459  | 3806  | Alx4    |        |
| Alxref  | 5847  | 5697  | 5619  | 5078  | 4463  | 4853  | 4875  | 6829  | 6211  | 5711  | 5951  | 7702  | 6698  | 7767  | 5416  | 4836  | 5355  | 4581  | 4941  | 5441  | 4965  | 5355  | 5896  | 6929  | 6399  | 8252  | 8270  | 8148  | Alxref  |        |
| Alxref2 | 205   | 267   | 289   | 374   | 475   | 348   | 416   | 381   | 451   | 506   | 482   | 474   | 361   | 466   | 278   | 216   | 460   | 369   | 485   | 430   | 403   | 448   | 471   | 512   | 557   | 446   | 475   | 436   | Alxref2 |        |
| Amacr   | 248   | 260   | 246   | 248   | 239   | 215   | 217   | 495   | 536   | 418   | 469   | 433   | 502   | 456   | 266   | 287   | 224   | 206   | 207   | 176   | 186   | 428   | 587   | 413   | 444   | 461   | 374   | 452   | Amacr   |        |
| Ambn    | 10    | 4     | 0     | 0     | 0     | 0     | 0     | 15    | 27    | 14    | 4     | 4     | 0     | 0     | 3     | 1     | 0     | 4     | 3     | 3     | 1     | 3     | 12    | 1     | 0     | 0     | 1     | 0     | Ambn    |        |
| Ambp    | 0     | 0     | 0     | 0     | 0     | 0     | 1     | 0     | 2     | 0     | 0     | 0     | 0     | 0     | 1     | 0     | 0     | 3     | 0     | 0     | 0     | 0     | 1     | 0     | 0     | 3     | 0     | 0     | Ambp    |        |
| Ambra1  | 4991  | 5664  | 6454  | 6638  | 6516  | 6469  | 5625  | 5101  | 5759  | 6671  | 6300  | 6746  | 6021  | 6156  | 4739  | 5314  | 6789  | 6632  | 7027  | 4904  | 6439  | 6697  | 5489  | 6375  | 6841  | 5849  | 5753  | 6108  | Ambra1  |        |
| Amd1    | 9883  | 8783  | 8401  | 7749  | 6889  | 8032  | 7996  | 8107  | 6958  | 5631  | 5864  | 7142  | 7164  | 7329  | 9965  | 10243 | 8105  | 8140  | 7033  | 9279  | 7346  | 5798  | 6932  | 6146  | 6072  | 8618  | 7706  | 7570  | Amd1    |        |
| Amd2    | 294   | 203   | 226   | 141   | 137   | 159   | 180   | 236   | 176   | 123   | 124   | 147   | 160   | 130   | 314   | 254   | 177   | 176   | 127   | 223   | 161   | 140   | 158   | 127   | 138   | 194   | 187   | 178   | Amd2    |        |
| Amdhd1  | 17    | 22    | 33    | 22    | 8     | 13    | 3     | 12    | 16    | 9     | 8     | 23    | 12    | 10    | 22    | 31    | 8     | 19    | 6     | 15    | 10    | 10    | 16    | 13    | 7     | 10    | 21    | 8     | Amdhd1  |        |
| Amdhd2  | 864   | 1122  | 1040  | 1097  | 1150  | 1084  | 991   | 801   | 1041  | 1050  | 1094  | 1101  | 1125  | 1004  | 891   | 1026  | 1176  | 1124  |       |       |       |       |       |       |       |       |       |       |         |        |



|            |       |       |       |       |       |       |       |       |       |       |       |       |       |       |       |       |       |       |       |       |       |       |       |       |       |       |       |       |            |         |        |
|------------|-------|-------|-------|-------|-------|-------|-------|-------|-------|-------|-------|-------|-------|-------|-------|-------|-------|-------|-------|-------|-------|-------|-------|-------|-------|-------|-------|-------|------------|---------|--------|
| Amy2a5     | 0     | 0     | 0     | 0     | 0     | 0     | 0     | 0     | 0     | 0     | 0     | 0     | 0     | 0     | 0     | 0     | 0     | 0     | 0     | 5     | 0     | 0     | 0     | 1     | 0     | 0     | 0     | 0     | 0          | 0       | Amy2a5 |
| Amz1       | 104   | 98    | 82    | 190   | 137   | 122   | 151   | 109   | 143   | 109   | 116   | 104   | 130   | 104   | 107   | 114   | 143   | 142   | 163   | 123   | 143   | 157   | 131   | 133   | 192   | 100   | 114   | 101   | Amz1       |         |        |
| Amz2       | 7989  | 8080  | 7719  | 9703  | 10748 | 9777  | 10756 | 11138 | 10299 | 11131 | 9648  | 10085 | 9097  | 10105 | 8380  | 6755  | 8887  | 9928  | 10516 | 9465  | 10944 | 12288 | 10015 | 10226 | 11631 | 9571  | 9603  | 9892  | Amz2       |         |        |
| Anapc1     | 21644 | 19671 | 13283 | 14506 | 14872 | 17814 | 16694 | 25565 | 23511 | 19863 | 20910 | 24411 | 23537 | 23851 | 20031 | 18714 | 13753 | 14339 | 14822 | 17297 | 16974 | 19248 | 22411 | 18442 | 21680 | 16778 | 25782 | 23265 | Anapc1     |         |        |
| Anapc10    | 2170  | 1841  | 2066  | 1981  | 1856  | 1815  | 2066  | 2019  | 1738  | 1657  | 1529  | 1707  | 1659  | 1919  | 2399  | 1981  | 1892  | 1915  | 1835  | 2282  | 1980  | 1656  | 1834  | 1718  | 1729  | 1913  | 1802  | 1958  | Anapc10    |         |        |
| Anapc11    | 2643  | 3090  | 3783  | 3301  | 2925  | 2985  | 2874  | 3104  | 3365  | 4024  | 3848  | 3989  | 3656  | 3880  | 2529  | 2767  | 3505  | 3213  | 3375  | 2923  | 2952  | 3322  | 3539  | 4269  | 4039  | 4557  | 3976  | 4162  | Anapc11    |         |        |
| Anapc13    | 1540  | 1815  | 2425  | 2159  | 1584  | 1379  | 2018  | 1774  | 1568  | 2542  | 2220  | 2418  | 2138  | 3575  | 1571  | 1037  | 2228  | 1604  | 1654  | 1732  | 2154  | 1484  | 1647  | 3029  | 2398  | 2870  | 2500  | 3504  | Anapc13    |         |        |
| Anapc15    | 1690  | 1804  | 1769  | 1690  | 1672  | 1612  | 1738  | 3219  | 2891  | 3080  | 2685  | 3396  | 3215  | 3632  | 1734  | 1511  | 1819  | 1608  | 1854  | 2113  | 1770  | 2854  | 2812  | 3242  | 3312  | 3654  | 3484  | 3640  | Anapc15    |         |        |
| Anapc15-ps | 24    | 28    | 19    | 24    | 16    | 23    | 18    | 33    | 19    | 24    | 14    | 33    | 33    | 45    | 33    | 14    | 27    | 8     | 15    | 20    | 11    | 22    | 28    | 24    | 19    | 40    | 31    | 31    | Anapc15-ps |         |        |
| Anapc16    | 2340  | 2455  | 2360  | 2243  | 2049  | 2135  | 2161  | 2998  | 2674  | 2668  | 2574  | 2853  | 2667  | 2878  | 2320  | 2022  | 2335  | 1869  | 2232  | 2274  | 2157  | 2724  | 2721  | 2716  | 2602  | 3021  | 2933  | 2963  | Anapc16    |         |        |
| Anapc2     | 11374 | 12103 | 12582 | 11551 | 10341 | 10425 | 10124 | 9431  | 10463 | 11100 | 10209 | 11942 | 11480 | 11059 | 10489 | 10731 | 11925 | 11526 | 11916 | 9436  | 10860 | 10347 | 10480 | 11416 | 11586 | 12308 | 11443 | 11720 | Anapc2     |         |        |
| Anapc4     | 10531 | 9021  | 9069  | 8841  | 9171  | 9274  | 9452  | 12038 | 10899 | 9531  | 9747  | 10833 | 10664 | 11043 | 11230 | 9156  | 8857  | 8526  | 9100  | 10435 | 8951  | 11134 | 10528 | 10152 | 10316 | 10873 | 10838 | 11272 | Anapc4     |         |        |
| Anapc5     | 25617 | 28587 | 22453 | 24453 | 25641 | 25521 | 26980 | 31614 | 31232 | 30610 | 29206 | 30401 | 28388 | 30544 | 26212 | 23521 | 24469 | 24448 | 26752 | 27729 | 27910 | 30239 | 30958 | 29179 | 31352 | 29673 | 30477 | 30688 | Anapc5     |         |        |
| Anapc7     | 6815  | 7975  | 6371  | 7215  | 6065  | 6596  | 5948  | 5186  | 5053  | 5127  | 5020  | 5805  | 5407  | 5435  | 6679  | 6611  | 6575  | 6540  | 6955  | 6651  | 6683  | 4610  | 5087  | 5247  | 5421  | 6049  | 5555  | 5700  | Anapc7     |         |        |
| Ang        | 85    | 40    | 51    | 34    | 44    | 40    | 30    | 66    | 54    | 71    | 81    | 76    | 85    | 40    | 62    | 79    | 61    | 56    | 47    | 56    | 38    | 58    | 73    | 60    | 44    | 44    | 45    | 51    | Ang        |         |        |
| Ang2       | 0     | 0     | 0     | 0     | 0     | 0     | 0     | 0     | 2     | 0     | 0     | 0     | 0     | 0     | 0     | 0     | 0     | 0     | 0     | 0     | 0     | 0     | 0     | 0     | 0     | 0     | 0     | 0     | 0          | Ang2    |        |
| Ang4       | 0     | 0     | 0     | 0     | 0     | 0     | 0     | 0     | 0     | 0     | 0     | 0     | 0     | 0     | 0     | 0     | 0     | 0     | 0     | 0     | 0     | 8     | 0     | 0     | 0     | 1     | 0     | 0     | 0          | Ang4    |        |
| Angel1     | 2006  | 2626  | 2656  | 2714  | 2305  | 2199  | 2185  | 1010  | 1148  | 1128  | 1184  | 1206  | 1243  | 1040  | 2073  | 2437  | 2615  | 2770  | 2485  | 2111  | 2242  | 1078  | 1062  | 1091  | 1237  | 1193  | 1074  | 1182  | Angel1     |         |        |
| Angel2     | 3233  | 2750  | 3404  | 2726  | 3232  | 3076  | 3374  | 7586  | 6372  | 6743  | 6076  | 7035  | 6815  | 7422  | 3332  | 2770  | 2950  | 2677  | 3239  | 3618  | 3202  | 6371  | 6333  | 6336  | 6765  | 7053  | 7678  | 7177  | Angel2     |         |        |
| Angpt1     | 1606  | 1137  | 1229  | 1273  | 1028  | 1501  | 972   | 2136  | 2286  | 1479  | 2214  | 1615  | 1971  | 1799  | 1822  | 1451  | 1305  | 1327  | 955   | 1230  | 993   | 2222  | 2799  | 1674  | 1744  | 1345  | 1864  | 1720  | Angpt1     |         |        |
| Angpt2     | 108   | 112   | 135   | 110   | 146   | 165   | 112   | 228   | 325   | 278   | 411   | 265   | 265   | 249   | 185   | 126   | 114   | 145   | 122   | 173   | 136   | 373   | 579   | 282   | 311   | 308   | 265   | 206   | Angpt2     |         |        |
| Angpt4     | 3     | 2     | 0     | 0     | 0     | 3     | 2     | 6     | 12    | 1     | 10    | 4     | 5     | 7     | 11    | 1     | 1     | 0     | 1     | 13    | 4     | 2     | 8     | 2     | 1     | 4     | 7     | 2     | 2          | Angpt4  |        |
| Angpt11    | 200   | 92    | 45    | 64    | 55    | 98    | 19    | 264   | 709   | 419   | 2129  | 110   | 305   | 101   | 156   | 191   | 50    | 100   | 34    | 47    | 22    | 516   | 1709  | 185   | 231   | 218   | 134   | 120   | Angpt11    |         |        |
| Angpt12    | 3453  | 3506  | 3030  | 2356  | 1943  | 2526  | 1446  | 2071  | 2918  | 2377  | 3513  | 2544  | 3312  | 2260  | 3208  | 4009  | 2730  | 2647  | 1673  | 1903  | 1460  | 2739  | 3547  | 2397  | 2173  | 2778  | 3029  | 2454  | Angpt12    |         |        |
| Angpt3     | 0     | 0     | 0     | 0     | 0     | 0     | 1     | 4     | 2     | 1     | 0     | 0     | 0     | 1     | 0     | 1     | 0     | 0     | 2     | 0     | 0     | 2     | 2     | 4     | 0     | 0     | 6     | 4     | 0          | Angpt3  |        |
| Angpt4     | 535   | 617   | 473   | 416   | 390   | 459   | 253   | 1102  | 1589  | 1070  | 1455  | 1006  | 1306  | 991   | 554   | 681   | 367   | 395   | 305   | 338   | 275   | 939   | 1996  | 993   | 957   | 1113  | 1076  | 1009  | Angpt4     |         |        |
| Angpt6     | 69    | 121   | 117   | 190   | 150   | 142   | 156   | 178   | 176   | 243   | 202   | 149   | 136   | 179   | 112   | 96    | 129   | 160   | 191   | 187   | 170   | 172   | 166   | 217   | 202   | 162   | 185   | 153   | Angpt6     |         |        |
| Angpt7     | 0     | 0     | 0     | 0     | 2     | 0     | 0     | 1     | 8     | 5     | 60    | 0     | 0     | 0     | 3     | 0     | 0     | 1     | 0     | 0     | 0     | 5     | 29    | 3     | 0     | 5     | 0     | 1     | 0          | Angpt7  |        |
| Angpt8     | 0     | 0     | 0     | 0     | 0     | 0     | 0     | 0     | 0     | 0     | 0     | 0     | 0     | 2     | 0     | 0     | 2     | 0     | 0     | 0     | 0     | 0     | 0     | 0     | 0     | 0     | 0     | 0     | 1          | Angpt8  |        |
| Ank        | 1239  | 1228  | 1163  | 1409  | 1753  | 1400  | 1450  | 1655  | 1858  | 1938  | 1840  | 1538  | 1608  | 1469  | 1304  | 1357  | 1377  | 1462  | 1563  | 1370  | 1516  | 1932  | 1676  | 1894  | 1822  | 1599  | 1434  | 1507  | Ank        |         |        |
| Ank1       | 413   | 656   | 698   | 544   | 1169  | 656   | 632   | 819   | 1182  | 1146  | 1716  | 945   | 1531  | 990   | 463   | 642   | 545   | 664   | 630   | 569   | 677   | 1390  | 1166  | 763   | 1288  | 568   | 908   | 1523  | Ank1       |         |        |
| Ank2       | 14229 | 16363 | 10938 | 17197 | 23275 | 25030 | 21908 | 23517 | 21994 | 22819 | 21392 | 21191 | 21020 | 22545 | 17921 | 15707 | 13568 | 17249 | 18839 | 21832 | 25782 | 24488 | 19935 | 17791 | 26681 | 11898 | 23336 | 18574 | Ank2       |         |        |
| Ank3       | 17162 | 19675 | 14300 | 24127 | 31675 | 35256 | 29195 | 28107 | 28951 | 31611 | 30881 | 24085 | 29227 | 26338 | 21726 | 20386 | 19668 | 24202 | 25563 | 28952 | 35887 | 31528 | 24886 | 21885 | 36426 | 12392 | 28259 | 22533 | Ank3       |         |        |
| Ankar      | 0     | 0     | 4     | 0     | 0     | 0     | 0     | 0     | 6     | 0     | 1     | 4     | 0     | 0     | 3     | 0     | 7     | 0     | 0     | 1     | 0     | 0     | 0     | 2     | 1     | 3     | 1     | 2     | 0          | Ankar   |        |
| Ankdd1a    | 8     | 29    | 9     | 13    | 56    | 40    | 26    | 32    | 69    | 30    | 64    | 54    | 52    | 39    | 15    | 44    | 27    | 30    | 38    | 14    | 20    | 62    | 46    | 30    | 63    | 4     | 31    | 14    | Ankdd1a    |         |        |
| Ankdd1b    | 7     | 6     | 0     | 5     | 5     | 2     | 3     | 7     | 2     | 10    | 7     | 2     | 9     | 0     | 4     | 21    | 8     | 19    | 7     | 4     | 5     | 3     | 4     | 5     | 5     | 0     | 2     | 0     | 0          | Ankdd1b |        |
| Ankff1     | 104   | 105   | 62    | 90    | 71    | 91    | 101   | 72    | 67    | 81    | 74    | 73    | 53    | 92    | 83    | 92    | 82    | 78    | 69    | 95    | 97    | 60    | 93    | 58    | 41    | 74    | 70    | 56    | Ankff1     |         |        |
| Ankfn1     | 215   | 253   | 62    | 174   | 223   | 271   | 236   | 289   | 326   | 243   | 228   | 261   | 254   | 259   | 218   | 188   | 130   | 171   | 217   | 312   | 258   | 261   | 231   | 200   | 372   | 74    | 311   | 211   | Ankfn1     |         |        |
| Ankfy1     | 10548 | 10331 | 6767  | 8343  | 8719  | 9114  | 9526  | 11242 | 11554 | 9400  | 9672  | 10083 | 9722  | 9748  | 10358 | 9786  | 7211  | 8680  | 8436  | 9860  | 9473  | 9347  | 10989 | 8615  | 9954  | 6585  | 10035 | 9130  | Ankfy1     |         |        |
| Ankhd1     | 14947 | 13377 | 6698  | 10678 | 10819 | 13262 | 12647 | 10926 | 9327  | 7684  | 7713  | 8484  | 8452  | 9003  | 14778 | 12376 | 8472  | 10272 | 9938  | 13674 | 13856 | 7010  | 8714  | 6409  | 8059  | 3677  | 9334  | 8062  | Ankhd1     |         |        |
| Ankib1     | 7874  | 7496  | 5739  | 8165  | 8771  | 8941  | 9184  | 6489  | 6044  | 5932  | 5873  | 5918  | 5697  | 6000  | 8375  | 7329  | 6981  | 8554  | 8419  | 8659  | 9388  | 6462  | 5929  | 5552  | 6591  | 4562  | 5975  | 5914  | Ankib1     |         |        |
| Ank11      | 14    | 14    | 10    | 21    | 18    | 14    | 13    | 0     | 3     | 0     | 1     | 2     | 0     | 1     | 11    | 20    | 21    | 18    | 16    | 1     | 13    | 0     | 1     | 2     | 0     | 0     | 0     | 1     | 0          | Ank11   |        |
| Ankle1     | 1336  | 1511  | 1606  | 1206  | 964   | 1154  | 1020  | 11111 | 1300  | 1375  | 1334  | 1930  | 1655  | 1583  | 1065  | 1284  | 1552  | 1080  | 1200  | 1166  | 916   | 1028  | 1243  | 1673  | 1286  | 2204  | 2133  | 1656  | Ankle1     |         |        |
| Ankle2     | 3973  | 3636  | 4218  | 3714  | 3624  | 3938  | 3998  | 5959  | 5113  | 5290  | 5209  | 5815  | 5349  | 5794  | 3939  | 3542  | 3815  | 3319  | 3973  | 3800  | 3707  | 5451  | 5095  | 5349  | 5285  | 5206  | 5715  | 5719  | Ankle2     |         |        |
| Ankmy1     | 54    | 56    | 53    | 82    | 56    | 87    | 45    | 34    | 36    | 30    | 46    | 28    | 27    | 31    | 51    | 62    | 44    | 47    | 49    | 55    | 61    | 25    | 37    | 14    | 18    | 24    | 23    | 37    | Ankmy1     |         |        |
| Ankmy2     | 3102  | 2906  | 2713  | 3102  | 3718  | 3420  | 3851  | 3604  | 3207  | 3024  | 2873  | 2448  | 2474  | 2763  | 3299  | 2666  | 2941  | 3387  | 3547  | 4011  | 3980  | 3430  | 3323  | 2960  | 2962  | 2618  | 2529  | 2534  | Ankmy2     |         |        |
| Ankra2     | 2726  | 2522  | 2370  | 2911  | 3160  | 2797  | 3403  | 3734  | 3232  | 3372  | 2882  | 2996  | 2735  | 3351  | 3119  | 2407  | 2716  | 2914  | 2982  | 3329  | 3091  | 3882  | 3180  | 3371  | 3543  | 2869  | 2826  | 3084  | Ankra2     |         |        |
| Ankrd1     | 10    | 3     | 6     | 0     | 0     | 3     | 0     | 17    | 21    | 8     | 151   | 0     | 6     | 3     | 4     | 2     | 0     | 7     | 2     | 0     | 0     | 7     | 93    | 6     | 12    | 5     | 0     | 4     | 0          | Ankrd1  |        |
| Ankrd10    | 11642 | 10547 | 9184  | 11545 | 11027 | 11616 | 12259 | 13575 | 12545 | 11309 | 12158 | 12716 | 12284 | 12983 | 10787 | 11386 | 9750  | 11825 | 11567 | 12140 | 12405 | 11135 | 11721 | 11537 | 12739 | 11740 | 13142 | 12043 | Ankrd10    |         |        |
| Ankrd11    | 20274 | 21298 | 18418 | 24519 | 23948 |       |       |       |       |       |       |       |       |       |       |       |       |       |       |       |       |       |       |       |       |       |       |       |            |         |        |



|         |       |       |       |       |       |       |       |       |       |       |       |       |       |       |       |       |       |       |       |       |       |       |       |       |       |       |       |       |         |
|---------|-------|-------|-------|-------|-------|-------|-------|-------|-------|-------|-------|-------|-------|-------|-------|-------|-------|-------|-------|-------|-------|-------|-------|-------|-------|-------|-------|-------|---------|
| Ankrd46 | 7448  | 7144  | 6629  | 6942  | 6732  | 7041  | 6612  | 7588  | 7373  | 7021  | 6970  | 6934  | 6783  | 6556  | 7622  | 6988  | 6782  | 6748  | 7279  | 7409  | 6864  | 7329  | 7502  | 6892  | 7313  | 6932  | 7494  | 6824  | Ankrd46 |
| Ankrd49 | 3332  | 2458  | 2541  | 2257  | 2217  | 2652  | 2972  | 3626  | 3284  | 2798  | 2645  | 3404  | 3208  | 3473  | 3225  | 2762  | 2730  | 2303  | 2484  | 3199  | 2683  | 2983  | 3146  | 3282  | 2969  | 3843  | 3749  | 3755  | Ankrd49 |
| Ankrd50 | 9646  | 11033 | 8929  | 12029 | 10596 | 10820 | 10047 | 9782  | 9009  | 9599  | 9424  | 10567 | 11253 | 10120 | 9965  | 10543 | 10339 | 11180 | 10823 | 9649  | 10881 | 10368 | 8857  | 9157  | 10141 | 6784  | 10838 | 10272 | Ankrd50 |
| Ankrd52 | 5890  | 6499  | 7634  | 7709  | 8759  | 7618  | 7777  | 6881  | 8098  | 9336  | 9136  | 10622 | 9191  | 10245 | 5087  | 5756  | 8379  | 8033  | 9006  | 6045  | 8258  | 9914  | 7175  | 10203 | 9983  | 6505  | 9209  | 9360  | Ankrd52 |
| Ankrd53 | 0     | 0     | 1     | 0     | 1     | 0     | 1     | 0     | 0     | 1     | 1     | 0     | 1     | 1     | 0     | 1     | 0     | 0     | 0     | 0     | 3     | 2     | 0     | 2     | 0     | 5     | 0     | 0     | Ankrd53 |
| Ankrd54 | 2754  | 3687  | 2646  | 3303  | 2477  | 2559  | 2407  | 1655  | 1921  | 1799  | 1650  | 1972  | 1871  | 1969  | 2557  | 2984  | 3005  | 2916  | 3060  | 2586  | 2364  | 1751  | 1826  | 1932  | 1771  | 2261  | 2079  | 2044  | Ankrd54 |
| Ankrd55 | 118   | 149   | 124   | 175   | 226   | 221   | 179   | 203   | 232   | 213   | 301   | 200   | 239   | 165   | 146   | 222   | 156   | 195   | 192   | 226   | 219   | 259   | 296   | 166   | 244   | 161   | 210   | 196   | Ankrd55 |
| Ankrd6  | 4888  | 5381  | 5538  | 5749  | 5866  | 6102  | 5637  | 4741  | 4107  | 4494  | 3702  | 4854  | 4727  | 4871  | 5401  | 5182  | 5655  | 5657  | 5799  | 5677  | 6205  | 4836  | 3770  | 4529  | 5216  | 3486  | 5421  | 5141  | Ankrd6  |
| Ankrd60 | 5     | 3     | 0     | 1     | 2     | 0     | 2     | 0     | 0     | 1     | 0     | 1     | 3     | 2     | 1     | 1     | 8     | 11    | 3     | 1     | 1     | 0     | 1     | 0     | 0     | 0     | 0     | 0     | Ankrd60 |
| Ankrd61 | 59    | 71    | 35    | 51    | 47    | 55    | 60    | 18    | 37    | 33    | 27    | 40    | 45    | 39    | 32    | 41    | 32    | 70    | 48    | 53    | 57    | 48    | 39    | 20    | 43    | 39    | 43    | 38    | Ankrd61 |
| Ankrd63 | 48    | 54    | 81    | 46    | 65    | 42    | 72    | 23    | 22    | 25    | 27    | 9     | 2     | 9     | 36    | 43    | 101   | 46    | 58    | 65    | 57    | 10    | 6     | 39    | 22    | 16    | 7     | 12    | Ankrd63 |
| Ankrd65 | 0     | 0     | 1     | 0     | 3     | 2     | 0     | 7     | 1     | 0     | 3     | 5     | 2     | 2     | 0     | 0     | 2     | 0     | 0     | 0     | 0     | 2     | 1     | 2     | 2     | 2     | 0     | 0     | Ankrd65 |
| Ankrd66 | 20    | 34    | 33    | 9     | 57    | 18    | 21    | 26    | 42    | 32    | 28    | 72    | 75    | 5     | 37    | 41    | 1     | 9     | 26    | 15    | 17    | 62    | 81    | 20    | 15    | 11    | 12    | 11    | Ankrd66 |
| Ankrd7  | 17    | 13    | 11    | 20    | 20    | 17    | 23    | 13    | 12    | 4     | 15    | 25    | 27    | 27    | 20    | 21    | 37    | 29    | 13    | 21    | 35    | 22    | 17    | 19    | 20    | 21    | 10    | 17    | Ankrd7  |
| Ankrd9  | 353   | 460   | 461   | 412   | 293   | 310   | 315   | 172   | 181   | 164   | 213   | 216   | 243   | 245   | 322   | 396   | 462   | 382   | 354   | 319   | 311   | 204   | 206   | 182   | 169   | 267   | 259   | 261   | Ankrd9  |
| Anks1   | 5619  | 7667  | 8448  | 8520  | 8732  | 7656  | 7156  | 6151  | 6650  | 8112  | 7181  | 8653  | 7186  | 7142  | 5902  | 7051  | 8757  | 8665  | 9411  | 6742  | 7774  | 8502  | 5737  | 8344  | 8853  | 7133  | 7102  | 7188  | Anks1   |
| Anks1b  | 741   | 902   | 788   | 1657  | 2686  | 2087  | 2338  | 2424  | 2453  | 2888  | 2403  | 1995  | 1676  | 2081  | 1196  | 696   | 1311  | 2100  | 2297  | 2155  | 2373  | 3863  | 2340  | 2483  | 3555  | 1488  | 1646  | 1690  | Anks1b  |
| Anks3   | 4398  | 5385  | 3941  | 4993  | 4381  | 4672  | 4403  | 3848  | 4294  | 4194  | 4090  | 4060  | 4073  | 3660  | 4383  | 5063  | 4457  | 4933  | 4634  | 4870  | 4423  | 4207  | 4161  | 4007  | 4442  | 3643  | 4350  | 3648  | Anks3   |
| Anks4b  | 9     | 9     | 2     | 13    | 11    | 10    | 3     | 7     | 8     | 1     | 3     | 3     | 17    | 6     | 12    | 2     | 7     | 8     | 6     | 3     | 7     | 7     | 9     | 7     | 4     | 7     | 5     | 8     | Anks4b  |
| Anks6   | 1130  | 1437  | 1274  | 1359  | 1508  | 1388  | 1052  | 723   | 971   | 891   | 1078  | 817   | 754   | 701   | 1062  | 1380  | 1329  | 1354  | 1333  | 1087  | 1105  | 912   | 981   | 910   | 961   | 862   | 752   | 716   | Anks6   |
| Ankub1  | 0     | 0     | 0     | 6     | 0     | 0     | 1     | 6     | 3     | 3     | 1     | 0     | 11    | 3     | 0     | 3     | 0     | 2     | 0     | 3     | 0     | 17    | 6     | 0     | 1     | 0     | 0     | 0     | Ankub1  |
| Ankzf1  | 2663  | 3141  | 2921  | 3397  | 2858  | 2881  | 2966  | 2094  | 2247  | 2356  | 2323  | 2139  | 2236  | 2206  | 2673  | 2769  | 3046  | 3264  | 3097  | 2903  | 2788  | 1920  | 2120  | 2300  | 2336  | 2058  | 2237  | 2052  | Ankzf1  |
| Anln    | 4802  | 3937  | 3982  | 2746  | 2466  | 2984  | 3209  | 5235  | 5037  | 4059  | 4136  | 5459  | 5059  | 5509  | 4145  | 4084  | 3509  | 2848  | 3024  | 3288  | 2847  | 3462  | 4842  | 4609  | 3788  | 5605  | 5610  | 5715  | Anln    |
| Ano1    | 922   | 832   | 858   | 769   | 821   | 903   | 701   | 1495  | 1443  | 1539  | 1261  | 2322  | 1630  | 2256  | 655   | 814   | 969   | 670   | 978   | 635   | 754   | 1437  | 1034  | 1758  | 1620  | 2035  | 2449  | 2235  | Ano1    |
| Ano10   | 4201  | 4521  | 3796  | 3361  | 3671  | 3650  | 3447  | 2836  | 2780  | 2443  | 2709  | 2618  | 3020  | 2500  | 4441  | 4587  | 3896  | 3778  | 3582  | 3475  | 3514  | 3013  | 2896  | 2402  | 2547  | 2370  | 2707  | 2626  | Ano10   |
| Ano2    | 8     | 10    | 10    | 4     | 9     | 10    | 3     | 27    | 28    | 8     | 28    | 15    | 37    | 6     | 16    | 26    | 2     | 6     | 0     | 1     | 6     | 10    | 27    | 29    | 3     | 42    | 13    | 14    | Ano2    |
| Ano3    | 243   | 246   | 304   | 248   | 268   | 170   | 229   | 313   | 269   | 248   | 234   | 220   | 270   | 211   | 301   | 312   | 309   | 187   | 182   | 275   | 220   | 297   | 263   | 154   | 194   | 161   | 224   | 260   | Ano3    |
| Ano4    | 236   | 269   | 189   | 316   | 482   | 397   | 388   | 712   | 620   | 517   | 437   | 403   | 371   | 495   | 318   | 210   | 246   | 362   | 336   | 494   | 412   | 749   | 469   | 362   | 631   | 290   | 475   | 389   | Ano4    |
| Ano5    | 130   | 84    | 112   | 83    | 244   | 215   | 170   | 110   | 92    | 80    | 283   | 64    | 88    | 72    | 178   | 114   | 114   | 112   | 144   | 214   | 189   | 125   | 197   | 72    | 83    | 37    | 87    | 61    | Ano5    |
| Ano6    | 6502  | 6271  | 4609  | 4786  | 5304  | 5567  | 4875  | 5409  | 6023  | 5520  | 5796  | 4835  | 5640  | 4799  | 6076  | 6600  | 4713  | 5122  | 4752  | 5322  | 4894  | 5098  | 6117  | 4877  | 4926  | 4125  | 5063  | 4753  | Ano6    |
| Ano7    | 5     | 9     | 9     | 4     | 9     | 1     | 2     | 15    | 22    | 13    | 32    | 4     | 9     | 26    | 3     | 11    | 9     | 8     | 3     | 7     | 2     | 10    | 21    | 8     | 5     | 5     | 8     | 8     | Ano7    |
| Ano8    | 3308  | 3940  | 5339  | 5534  | 6245  | 5411  | 4954  | 6557  | 6844  | 9267  | 7546  | 9455  | 7666  | 8601  | 3319  | 3454  | 6070  | 5497  | 6820  | 4882  | 5290  | 9346  | 5812  | 9982  | 10296 | 9089  | 8450  | 8001  | Ano8    |
| Ano9    | 168   | 75    | 31    | 31    | 8     | 19    | 4     | 104   | 88    | 71    | 60    | 5     | 24    | 14    | 57    | 78    | 12    | 59    | 9     | 4     | 4     | 28    | 124   | 81    | 16    | 64    | 8     | 7     | Ano9    |
| Anp32a  | 29109 | 25734 | 36041 | 29703 | 24818 | 26510 | 30388 | 29771 | 26028 | 30219 | 25946 | 33827 | 31207 | 38626 | 29204 | 24789 | 31217 | 26106 | 28442 | 31604 | 28774 | 22020 | 25161 | 36038 | 30912 | 43961 | 36101 | 39303 | Anp32a  |
| Anp32b  | 12664 | 10028 | 15697 | 10851 | 8966  | 9646  | 10876 | 15520 | 15765 | 18696 | 17815 | 23248 | 20155 | 26787 | 11409 | 11011 | 12913 | 9127  | 10299 | 9043  | 10085 | 14051 | 15312 | 22514 | 17304 | 30072 | 23423 | 28188 | Anp32b  |
| Anp32e  | 25535 | 21153 | 30084 | 23791 | 22054 | 23199 | 26418 | 25457 | 21626 | 23966 | 22410 | 32727 | 27857 | 36316 | 24857 | 20119 | 27310 | 21454 | 23927 | 25784 | 23582 | 20568 | 20152 | 29882 | 27314 | 39452 | 35805 | 35719 | Anp32e  |
| Anpep   | 629   | 785   | 916   | 734   | 707   | 810   | 402   | 545   | 864   | 884   | 1206  | 706   | 864   | 607   | 636   | 967   | 676   | 977   | 545   | 393   | 449   | 782   | 1157  | 854   | 547   | 652   | 547   | Anpep |         |
| Antkmt  | 1816  | 2452  | 3031  | 2584  | 1755  | 1567  | 1796  | 996   | 1090  | 1339  | 1193  | 1634  | 1352  | 1503  | 1723  | 1870  | 2972  | 2187  | 2219  | 1662  | 1692  | 993   | 1013  | 1548  | 1306  | 1920  | 1656  | 1567  | Antkmt  |
| Antxr1  | 2653  | 1789  | 1917  | 1514  | 1411  | 1889  | 1019  | 4068  | 5065  | 4586  | 6666  | 3683  | 4262  | 3688  | 2002  | 2475  | 1658  | 1589  | 1340  | 1037  | 1146  | 4030  | 6512  | 4322  | 3220  | 4288  | 3453  | 3668  | Antxr1  |
| Antxr2  | 910   | 772   | 894   | 530   | 610   | 706   | 577   | 1215  | 1487  | 1061  | 1965  | 1149  | 1406  | 1296  | 881   | 910   | 727   | 623   | 565   | 546   | 597   | 1332  | 1681  | 1137  | 1023  | 1447  | 1564  | 1330  | Antxr2  |
| Anxa10  | 366   | 210   | 205   | 129   | 142   | 366   | 56    | 1106  | 1397  | 1014  | 1023  | 332   | 555   | 460   | 348   | 326   | 110   | 382   | 91    | 120   | 86    | 540   | 1770  | 779   | 428   | 306   | 368   | 432   | Anxa10  |
| Anxa10  | 0     | 0     | 0     | 0     | 1     | 0     | 0     | 0     | 0     | 0     | 0     | 0     | 0     | 0     | 0     | 0     | 0     | 0     | 0     | 1     | 0     | 0     | 1     | 0     | 3     | 1     | 1     | 2     | Anxa10  |
| Anxa11  | 476   | 473   | 562   | 374   | 277   | 321   | 170   | 172   | 227   | 287   | 333   | 153   | 198   | 113   | 426   | 600   | 370   | 308   | 238   | 261   | 161   | 157   | 353   | 250   | 144   | 330   | 177   | 135   | Anxa11  |
| Anxa13  | 0     | 0     | 0     | 0     | 0     | 0     | 0     | 0     | 0     | 0     | 0     | 0     | 0     | 0     | 0     | 0     | 0     | 0     | 0     | 0     | 0     | 0     | 1     | 0     | 0     | 0     | 0     | 0     | Anxa13  |
| Anxa2   | 14492 | 11804 | 8836  | 5853  | 5109  | 7996  | 3123  | 13219 | 18123 | 10420 | 14597 | 8647  | 12895 | 8822  | 13383 | 14843 | 6464  | 8981  | 3905  | 4625  | 3471  | 10260 | 19634 | 10263 | 7892  | 9074  | 9590  | 9721  | Anxa2   |
| Anxa3   | 1873  | 1760  | 2116  | 1200  | 1015  | 1339  | 965   | 1236  | 1346  | 1230  | 1476  | 1491  | 1969  | 1743  | 2015  | 2251  | 1418  | 1273  | 939   | 1290  | 925   | 15267 | 1774  | 1314  | 1247  | 1483  | 1995  | 1798  | Anxa3   |
| Anxa4   | 679   | 557   | 537   | 520   | 354   | 626   | 269   | 641   | 741   | 574   | 814   | 437   | 606   | 456   | 715   | 836   | 533   | 604   | 317   | 372   | 269   | 548   | 989   | 602   | 422   | 606   | 439   | 475   | Anxa4   |
| Anxa5   | 7125  | 5820  | 5511  | 3915  | 3576  | 3841  | 2992  | 5177  | 6215  | 4605  | 6420  | 3532  | 4626  | 3857  | 6893  | 7153  | 4511  | 4767  | 2969  | 3506  | 3117  | 4958  | 7182  | 4209  | 3796  | 4831  | 4192  | 4048  | Anxa5   |
| Anxa6   | 10823 | 10127 | 8340  | 5949  | 4896  | 6981  | 3284  | 7097  | 10711 | 7337  | 12520 | 6485  | 9027  | 5773  | 10334 | 13025 | 6189  | 7383  | 3893  | 4065  | 3604  | 6863  | 13389 | 6588  | 5722  | 6847  | 7203  | 6503  | Anxa6   |
| Anxa7   | 2651  | 2129  | 2131  | 1540  | 1417  | 1714  | 1306  | 1834  | 2197  | 1769  | 2293  | 1499  | 1979  | 1463  | 2399  | 1784  | 1865  | 1776  | 1301  | 1211  | 122   |       |       |       |       |       |       |       |         |

|         |       |       |       |       |       |       |       |       |       |       |       |       |       |       |       |       |       |       |       |       |       |       |       |       |       |       |       |       |         |
|---------|-------|-------|-------|-------|-------|-------|-------|-------|-------|-------|-------|-------|-------|-------|-------|-------|-------|-------|-------|-------|-------|-------|-------|-------|-------|-------|-------|-------|---------|
| Ap3m2   | 3787  | 5232  | 3661  | 5345  | 5506  | 5051  | 5006  | 3780  | 3681  | 3786  | 3300  | 3355  | 3399  | 3244  | 4713  | 4237  | 4595  | 5507  | 5354  | 5538  | 5319  | 4351  | 3500  | 3289  | 3774  | 2874  | 3266  | 3218  | Ap3m2   |
| Ap3s1   | 8975  | 6913  | 8029  | 9063  | 8631  | 8939  | 11394 | 7192  | 6018  | 6287  | 5775  | 6604  | 6243  | 7331  | 9370  | 8018  | 8496  | 8900  | 8837  | 10031 | 10367 | 6662  | 6256  | 6497  | 6695  | 6881  | 6386  | 7113  | Ap3s1   |
| Ap3s2   | 9388  | 10268 | 10508 | 11392 | 10736 | 10294 | 10983 | 8280  | 8039  | 8883  | 7933  | 9747  | 8566  | 9851  | 9566  | 8783  | 11356 | 11184 | 10841 | 9574  | 11422 | 8834  | 7549  | 9077  | 10273 | 9167  | 9376  | 9653  | Ap3s2   |
| Ap4b1   | 68    | 55    | 32    | 50    | 44    | 43    | 50    | 93    | 80    | 64    | 51    | 105   | 50    | 96    | 79    | 43    | 29    | 37    | 37    | 47    | 60    | 63    | 63    | 83    | 62    | 46    | 50    | 62    | Ap4b1   |
| Ap4e1   | 2624  | 2128  | 1706  | 2256  | 2274  | 2671  | 2616  | 3329  | 2970  | 2886  | 3213  | 2888  | 2999  | 3141  | 2520  | 2445  | 1815  | 2248  | 2222  | 2461  | 2602  | 2844  | 2862  | 2589  | 2916  | 1681  | 3045  | 2763  | Ap4e1   |
| Ap4m1   | 2475  | 2858  | 2786  | 2751  | 2959  | 2587  | 2913  | 5385  | 5401  | 5642  | 5849  | 5908  | 5389  | 6030  | 2447  | 2430  | 2741  | 2641  | 3006  | 2664  | 2811  | 5513  | 5256  | 6235  | 5951  | 5853  | 5736  | 5681  | Ap4m1   |
| Ap4s1   | 615   | 567   | 677   | 584   | 668   | 659   | 739   | 1440  | 1069  | 1137  | 1089  | 1397  | 1266  | 1561  | 674   | 579   | 663   | 530   | 634   | 790   | 630   | 1228  | 1062  | 1245  | 1314  | 1297  | 1460  | 1600  | Ap4s1   |
| Ap5b1   | 175   | 216   | 219   | 145   | 215   | 192   | 161   | 156   | 238   | 265   | 221   | 214   | 223   | 170   | 131   | 206   | 212   | 163   | 202   | 178   | 163   | 209   | 242   | 186   | 205   | 170   | 184   | 161   | Ap5b1   |
| Ap5m1   | 5666  | 4939  | 4735  | 4587  | 3738  | 4634  | 4407  | 4798  | 3869  | 3410  | 3452  | 3751  | 3920  | 3939  | 5792  | 5251  | 4216  | 4040  | 3876  | 5013  | 4452  | 3604  | 3871  | 3140  | 3328  | 3085  | 4210  | 4160  | Ap5m1   |
| Ap5s1   | 952   | 1137  | 1123  | 1047  | 1017  | 1002  | 1077  | 568   | 766   | 745   | 768   | 799   | 745   | 685   | 969   | 961   | 1304  | 1052  | 1159  | 1045  | 1032  | 690   | 728   | 727   | 806   | 838   | 788   | 777   | Ap5s1   |
| Ap5z1   | 1413  | 2008  | 1953  | 2069  | 1726  | 1777  | 1820  | 1185  | 1430  | 1714  | 1518  | 1658  | 1583  | 1619  | 1412  | 1840  | 2221  | 2172  | 1908  | 1511  | 1757  | 1529  | 1489  | 1647  | 1624  | 1559  | 1456  | 1499  | Ap5z1   |
| Apaf1   | 11988 | 10066 | 8804  | 10459 | 10366 | 11179 | 11515 | 6303  | 5883  | 5956  | 6531  | 6570  | 6427  | 6292  | 11404 | 10728 | 10050 | 11077 | 10202 | 10194 | 10879 | 6219  | 5972  | 5643  | 6293  | 5341  | 6393  | 6267  | Apaf1   |
| Apba1   | 1826  | 2390  | 2419  | 3936  | 5600  | 4040  | 3636  | 3280  | 3515  | 4895  | 4081  | 2723  | 2899  | 2635  | 2259  | 2098  | 3461  | 4709  | 4472  | 3637  | 4291  | 5738  | 3407  | 3481  | 4946  | 1931  | 2310  | 2300  | Apba1   |
| Apba2   | 3372  | 4331  | 3887  | 5507  | 7221  | 6487  | 6446  | 7199  | 7928  | 9585  | 7119  | 9621  | 7921  | 8961  | 3938  | 3572  | 5030  | 5852  | 6982  | 6218  | 6593  | 9900  | 7445  | 9014  | 11029 | 6991  | 8214  | 8268  | Apba2   |
| Apba3   | 915   | 1249  | 1205  | 1131  | 979   | 943   | 794   | 718   | 973   | 956   | 1026  | 891   | 959   | 765   | 881   | 1136  | 1172  | 995   | 966   | 886   | 799   | 891   | 1018  | 1084  | 874   | 1047  | 898   | 808   | Apba3   |
| Apbb1   | 6485  | 8702  | 8517  | 10303 | 11274 | 10481 | 9198  | 9358  | 9923  | 11356 | 8922  | 10276 | 9300  | 9618  | 7234  | 7131  | 9430  | 9584  | 12127 | 10200 | 10585 | 10079 | 9688  | 10525 | 11532 | 9938  | 9358  | 9088  | Apbb1   |
| Apbb1ip | 133   | 122   | 132   | 71    | 105   | 112   | 60    | 160   | 194   | 144   | 212   | 185   | 217   | 159   | 153   | 158   | 79    | 107   | 113   | 73    | 84    | 175   | 223   | 159   | 137   | 206   | 164   | 139   | Apbb1ip |
| Apbb2   | 3829  | 3785  | 3264  | 4538  | 5492  | 5221  | 4733  | 4488  | 4827  | 5423  | 5093  | 4016  | 4388  | 3858  | 4022  | 3931  | 4130  | 4914  | 4841  | 4824  | 4837  | 5683  | 4577  | 4427  | 5133  | 3141  | 3975  | 3836  | Apbb2   |
| Apbb3   | 2774  | 2902  | 2502  | 3362  | 3283  | 3278  | 3084  | 2640  | 2795  | 2836  | 3146  | 2950  | 3004  | 2872  | 2759  | 2697  | 2878  | 3175  | 3171  | 3110  | 3073  | 2889  | 2544  | 2938  | 2942  | 2275  | 3022  | 2655  | Apbb3   |
| Apbc    | 26404 | 24306 | 14195 | 23055 | 32127 | 36727 | 34134 | 44512 | 38458 | 33076 | 31744 | 30316 | 30481 | 32290 | 30005 | 23140 | 18463 | 24434 | 26772 | 37361 | 36282 | 33175 | 34783 | 24988 | 38261 | 17763 | 32847 | 26743 | Apbc    |
| Apcc2   | 10576 | 16116 | 18029 | 25548 | 28939 | 24028 | 21499 | 22769 | 26060 | 35717 | 26925 | 35575 | 26055 | 30702 | 12481 | 11576 | 24087 | 24384 | 30677 | 20128 | 24929 | 40494 | 22340 | 36222 | 42782 | 21437 | 28123 | 28106 | Apcc2   |
| Apccd1  | 10785 | 8746  | 11312 | 8627  | 10014 | 9721  | 8670  | 10479 | 12286 | 10506 | 9699  | 11499 | 11509 | 11346 | 8087  | 8069  | 9123  | 9441  | 10031 | 9066  | 9509  | 9115  | 13966 | 10260 | 10275 | 9981  | 12420 | 12142 | Apccd1  |
| Apch    | 5317  | 6565  | 5711  | 5178  | 4379  | 4527  | 3961  | 3373  | 3313  | 3314  | 3133  | 3627  | 3955  | 3312  | 5164  | 5524  | 5738  | 4833  | 4998  | 4895  | 4290  | 3046  | 3366  | 3340  | 3353  | 3603  | 3760  | 3748  | Apch    |
| Apela   | 172   | 105   | 84    | 102   | 71    | 77    | 99    | 65    | 63    | 74    | 45    | 38    | 10    | 80    | 144   | 99    | 145   | 88    | 100   | 54    | 92    | 40    | 39    | 60    | 46    | 61    | 71    | 55    | Apela   |
| Apex1   | 7782  | 7665  | 6918  | 6205  | 6139  | 6535  | 7099  | 8387  | 6982  | 6462  | 6590  | 7979  | 7274  | 8886  | 7805  | 6382  | 6968  | 5832  | 7006  | 8102  | 7022  | 6082  | 6614  | 7778  | 7040  | 9615  | 8548  | 9165  | Apex1   |
| Apex2   | 1076  | 1119  | 909   | 896   | 991   | 1075  | 903   | 1694  | 1594  | 1528  | 1422  | 1552  | 1489  | 1522  | 1033  | 1132  | 980   | 754   | 1090  | 1097  | 1009  | 1424  | 1551  | 1461  | 1517  | 1821  | 1621  | 1594  | Apex2   |
| Aph1a   | 5360  | 5876  | 7108  | 6091  | 5273  | 5474  | 4911  | 3555  | 3882  | 3763  | 4081  | 4483  | 4308  | 3965  | 5035  | 5672  | 6592  | 6125  | 6208  | 5114  | 4900  | 3798  | 3959  | 4306  | 4331  | 5357  | 4245  | 4154  | Aph1a   |
| Aph1b   | 5051  | 4380  | 4083  | 5032  | 5829  | 5756  | 6369  | 4426  | 3870  | 3640  | 3781  | 3781  | 3653  | 5426  | 4153  | 4552  | 5316  | 5573  | 5806  | 6157  | 5747  | 4029  | 3519  | 3620  | 4140  | 3217  | 3524  | 3648  | Aph1b   |
| Aph1c   | 1539  | 1462  | 1189  | 1428  | 1233  | 1344  | 1393  | 252   | 278   | 213   | 240   | 211   | 230   | 227   | 1593  | 1542  | 1270  | 1508  | 1266  | 1290  | 1399  | 264   | 320   | 210   | 247   | 183   | 182   | 208   | Aph1c   |
| Api5    | 24314 | 20707 | 21704 | 19385 | 16176 | 17762 | 19791 | 16133 | 13479 | 12715 | 12439 | 15610 | 15221 | 15618 | 23512 | 21925 | 20067 | 18610 | 16892 | 19783 | 18291 | 12953 | 13286 | 13838 | 12818 | 17484 | 16095 | 16798 | Api5    |
| Apip    | 1584  | 1386  | 1466  | 1294  | 1278  | 1289  | 1569  | 1274  | 1388  | 1365  | 1452  | 1237  | 1326  | 1457  | 1468  | 1418  | 1523  | 1383  | 1474  | 1437  | 1447  | 1150  | 1310  | 1403  | 1233  | 1472  | 1353  | 1477  | Apip    |
| Apif    | 2540  | 2571  | 2674  | 2864  | 2306  | 2377  | 2439  | 950   | 991   | 998   | 1078  | 974   | 1009  | 1053  | 2669  | 2356  | 2824  | 2674  | 2451  | 2408  | 2436  | 866   | 999   | 1068  | 965   | 1201  | 965   | 1000  | Apif    |
| Apin    | 843   | 677   | 889   | 849   | 883   | 1111  | 800   | 943   | 1027  | 1063  | 1084  | 829   | 793   | 805   | 905   | 710   | 841   | 972   | 1009  | 667   | 819   | 993   | 1081  | 1026  | 834   | 869   | 716   | 820   | Apin    |
| Apinr   | 1043  | 985   | 1611  | 824   | 1240  | 994   | 1014  | 1977  | 2529  | 2297  | 2890  | 2426  | 3072  | 2414  | 981   | 1104  | 1125  | 1037  | 1018  | 1016  | 970   | 2558  | 2897  | 2147  | 2508  | 2693  | 2712  | 2300  | Apinr   |
| Apip1   | 9724  | 13331 | 10301 | 17768 | 21559 | 18477 | 17021 | 16918 | 17409 | 19396 | 15529 | 14949 | 13981 | 14089 | 11890 | 10615 | 15286 | 18421 | 21860 | 18415 | 19793 | 21763 | 17421 | 16865 | 20495 | 12226 | 13093 | 13309 | Apip1   |
| Apip2   | 28305 | 29933 | 26283 | 29138 | 27513 | 26115 | 27436 | 17594 | 17386 | 17497 | 16637 | 15329 | 16484 | 15439 | 29024 | 28778 | 25910 | 31094 | 26135 | 25661 | 28188 | 17615 | 17656 | 15953 | 16330 | 14693 | 15137 | 15338 | Apip2   |
| Apmap   | 3516  | 3742  | 3377  | 3501  | 2994  | 3172  | 3254  | 2497  | 2262  | 2133  | 1934  | 2303  | 2250  | 2384  | 3840  | 3348  | 3117  | 3184  | 3125  | 3531  | 3118  | 2261  | 2305  | 2262  | 2160  | 2546  | 2256  | 2366  | Apmap   |
| Apoa1   | 8     | 21    | 10    | 8     | 26    | 6     | 9     | 10    | 86    | 13    | 5     | 0     | 6     | 14    | 8     | 23    | 3     | 13    | 5     | 10    | 6     | 10    | 28    | 11    | 11    | 6     | 9     | 20    | Apoa1   |
| Apoa2   | 32    | 48    | 62    | 49    | 43    | 42    | 26    | 29    | 65    | 30    | 40    | 48    | 56    | 50    | 32    | 51    | 44    | 36    | 37    | 60    | 29    | 43    | 45    | 41    | 33    | 52    | 53    | 56    | Apoa2   |
| Apoa4   | 1     | 7     | 0     | 0     | 9     | 0     | 0     | 0     | 42    | 1     | 2     | 0     | 0     | 2     | 0     | 19    | 1     | 4     | 0     | 1     | 0     | 8     | 14    | 0     | 0     | 0     | 0     | 1     | Apoa4   |
| Apoa5   | 0     | 0     | 0     | 0     | 0     | 0     | 0     | 0     | 2     | 0     | 0     | 0     | 0     | 5     | 0     | 0     | 0     | 0     | 0     | 0     | 0     | 0     | 0     | 0     | 0     | 0     | 0     | 0     | Apoa5   |
| Apob    | 8     | 42    | 25    | 2     | 24    | 16    | 8     | 44    | 119   | 36    | 64    | 41    | 48    | 18    | 20    | 48    | 20    | 10    | 5     | 4     | 4     | 75    | 72    | 7     | 21    | 10    | 31    | 13    | Apob    |
| Apobec1 | 130   | 113   | 124   | 134   | 185   | 190   | 200   | 145   | 187   | 160   | 149   | 160   | 137   | 152   | 146   | 116   | 123   | 124   | 182   | 205   | 205   | 139   | 170   | 127   | 177   | 180   | 153   | 148   | Apobec1 |
| Apobec2 | 1     | 0     | 0     | 0     | 1     | 0     | 0     | 0     | 2     | 0     | 11    | 0     | 0     | 0     | 1     | 0     | 0     | 3     | 2     | 0     | 0     | 0     | 6     | 0     | 0     | 0     | 0     | 1     | Apobec2 |
| Apobec3 | 200   | 203   | 192   | 174   | 147   | 163   | 164   | 242   | 377   | 355   | 415   | 298   | 266   | 321   | 174   | 202   | 172   | 178   | 186   | 168   | 165   | 261   | 355   | 313   | 272   | 358   | 280   | 306   | Apobec3 |
| Apobec4 | 0     | 0     | 0     | 0     | 0     | 0     | 0     | 6     | 2     | 4     | 0     | 1     | 0     | 0     | 0     | 0     | 1     | 0     | 1     | 0     | 0     | 0     | 0     | 1     | 0     | 0     | 0     | 1     | Apobec4 |
| Apobr   | 22    | 21    | 36    | 36    | 16    | 29    | 8     | 48    | 47    | 38    | 80    | 65    | 45    | 49    | 15    | 27    | 30    | 20    | 16    | 14    | 16    | 43    | 89    | 72    | 43    | 62    | 48    | 68    | Apobr   |
| Apoc1   | 14    | 13    | 10    | 9     | 11    | 7     | 7     | 11    | 16    | 19    | 20    | 5     | 25    | 14    | 12    | 14    | 12    | 9     | 13    | 15    | 7     | 7     | 27    | 35    | 8     | 11    | 9     | 19    | Apoc1   |
| Apoc3   |       |       |       |       |       |       |       |       |       |       |       |       |       |       |       |       |       |       |       |       |       |       |       |       |       |       |       |       |         |



|          |       |       |       |       |       |       |       |       |       |       |       |       |       |       |       |       |       |       |       |       |       |       |       |       |       |       |       |       |          |        |
|----------|-------|-------|-------|-------|-------|-------|-------|-------|-------|-------|-------|-------|-------|-------|-------|-------|-------|-------|-------|-------|-------|-------|-------|-------|-------|-------|-------|-------|----------|--------|
| Arhgef12 | 16387 | 15836 | 11286 | 16874 | 18261 | 18708 | 18676 | 16201 | 16665 | 17145 | 17062 | 15699 | 15686 | 15915 | 15427 | 15411 | 13418 | 17288 | 17093 | 15344 | 19827 | 16753 | 15392 | 14442 | 18367 | 10241 | 15869 | 14445 | Arhgef12 |        |
| Arhgef15 | 352   | 430   | 545   | 458   | 620   | 593   | 465   | 965   | 1233  | 1272  | 1453  | 1017  | 1298  | 1141  | 398   | 385   | 467   | 407   | 570   | 469   | 517   | 1497  | 1286  | 1119  | 1456  | 1177  | 1168  | 1069  | Arhgef15 |        |
| Arhgef16 | 269   | 207   | 122   | 75    | 77    | 75    | 23    | 98    | 193   | 97    | 148   | 47    | 118   | 33    | 169   | 255   | 111   | 97    | 44    | 15    | 23    | 87    | 179   | 86    | 52    | 103   | 45    | 46    | Arhgef16 |        |
| Arhgef17 | 4954  | 5390  | 5657  | 4692  | 4808  | 4564  | 3741  | 4176  | 5437  | 5811  | 5945  | 5427  | 5533  | 4423  | 4044  | 6049  | 5247  | 4642  | 4957  | 3303  | 3771  | 4749  | 5554  | 5675  | 4365  | 5065  | 4983  | 4707  | Arhgef17 |        |
| Arhgef18 | 4863  | 5942  | 5223  | 6074  | 5332  | 5458  | 5158  | 3444  | 3634  | 3911  | 3678  | 3924  | 3983  | 3523  | 4684  | 5197  | 5651  | 5986  | 5841  | 4730  | 5495  | 4080  | 3638  | 3801  | 4002  | 3318  | 3665  | 3767  | Arhgef18 |        |
| Arhgef19 | 682   | 637   | 533   | 654   | 489   | 564   | 374   | 668   | 1070  | 832   | 805   | 262   | 498   | 275   | 537   | 717   | 608   | 712   | 507   | 371   | 406   | 541   | 1041  | 707   | 287   | 708   | 257   | 240   | Arhgef19 |        |
| Arhgef2  | 5173  | 5282  | 6523  | 6244  | 8635  | 7479  | 7169  | 10811 | 11603 | 13952 | 13765 | 13760 | 12911 | 13659 | 5041  | 5277  | 6667  | 6366  | 8219  | 6061  | 7144  | 13892 | 10928 | 14711 | 15807 | 12132 | 12723 | 13010 | Arhgef2  |        |
| Arhgef25 | 6004  | 6167  | 8029  | 6548  | 6080  | 6290  | 5291  | 6377  | 7345  | 8048  | 9005  | 7300  | 7652  | 6839  | 5731  | 6329  | 7793  | 6433  | 6314  | 4839  | 5426  | 6794  | 7580  | 8544  | 7087  | 8762  | 7143  | 7031  | Arhgef25 |        |
| Arhgef26 | 15663 | 15553 | 1525  | 1584  | 2356  | 2030  | 2128  | 1652  | 1881  | 1845  | 1828  | 1508  | 1659  | 1417  | 1841  | 1598  | 1757  | 1973  | 2007  | 1631  | 2067  | 1890  | 1803  | 1454  | 1635  | 1369  | 1306  | 1318  | Arhgef26 |        |
| Arhgef28 | 641   | 563   | 484   | 481   | 763   | 496   | 460   | 1016  | 1167  | 1021  | 1157  | 626   | 1061  | 664   | 661   | 700   | 523   | 567   | 447   | 557   | 481   | 1084  | 1154  | 782   | 940   | 598   | 669   | 672   | Arhgef28 |        |
| Arhgef3  | 706   | 695   | 456   | 481   | 526   | 529   | 417   | 441   | 726   | 638   | 770   | 285   | 535   | 276   | 796   | 806   | 395   | 550   | 360   | 456   | 380   | 421   | 854   | 429   | 286   | 258   | 227   | 243   | Arhgef3  |        |
| Arhgef33 | 103   | 97    | 52    | 88    | 160   | 105   | 153   | 46    | 60    | 74    | 86    | 49    | 57    | 61    | 123   | 104   | 86    | 101   | 80    | 111   | 122   | 70    | 96    | 40    | 63    | 45    | 80    | 49    | Arhgef33 |        |
| Arhgef37 | 193   | 193   | 137   | 180   | 241   | 277   | 202   | 217   | 278   | 273   | 272   | 177   | 229   | 186   | 208   | 210   | 134   | 254   | 199   | 208   | 178   | 247   | 266   | 242   | 295   | 118   | 188   | 186   | Arhgef37 |        |
| Arhgef38 | 55    | 21    | 7     | 39    | 9     | 5     | 7     | 84    | 69    | 112   | 56    | 10    | 45    | 14    | 36    | 26    | 7     | 14    | 7     | 6     | 3     | 22    | 98    | 91    | 11    | 49    | 13    | 1     | Arhgef38 |        |
| Arhgef39 | 698   | 807   | 907   | 615   | 509   | 497   | 618   | 1012  | 1091  | 1114  | 1028  | 1571  | 1315  | 1325  | 575   | 623   | 856   | 525   | 678   | 612   | 549   | 745   | 952   | 1359  | 1071  | 1860  | 1510  | 1489  | Arhgef39 |        |
| Arhgef4  | 806   | 1256  | 868   | 1410  | 2306  | 1773  | 1401  | 1771  | 2007  | 2026  | 1824  | 1349  | 2075  | 1359  | 1331  | 1347  | 1337  | 1556  | 1591  | 1496  | 1457  | 2064  | 2048  | 1285  | 1875  | 837   | 1422  | 1247  | Arhgef4  |        |
| Arhgef40 | 6597  | 7280  | 7278  | 8063  | 8162  | 7850  | 7507  | 7040  | 8581  | 9117  | 10284 | 9295  | 9311  | 8312  | 5906  | 6696  | 7930  | 8128  | 8584  | 6349  | 7426  | 8457  | 8420  | 9268  | 8546  | 8443  | 8681  | 8285  | Arhgef40 |        |
| Arhgef5  | 627   | 350   | 361   | 218   | 362   | 376   | 207   | 1442  | 1624  | 1396  | 1480  | 910   | 1204  | 832   | 477   | 470   | 271   | 299   | 259   | 229   | 193   | 993   | 1764  | 1177  | 877   | 935   | 943   | 934   | Arhgef5  |        |
| Arhgef6  | 784   | 733   | 459   | 611   | 743   | 844   | 685   | 1172  | 1241  | 1053  | 1228  | 804   | 895   | 867   | 965   | 866   | 708   | 676   | 640   | 806   | 672   | 1206  | 1263  | 743   | 961   | 682   | 906   | 739   | Arhgef6  |        |
| Arhgef7  | 9513  | 10782 | 9719  | 10989 | 11295 | 11062 | 10335 | 12121 | 13422 | 14563 | 13282 | 15278 | 12647 | 14440 | 9461  | 8004  | 10331 | 11203 | 11389 | 9935  | 10873 | 14437 | 12234 | 14679 | 16790 | 13860 | 13702 | 13362 | Arhgef7  |        |
| Arhgef9  | 4507  | 4204  | 3729  | 4815  | 6057  | 5694  | 6234  | 7607  | 6990  | 6606  | 6530  | 5376  | 5611  | 6024  | 5151  | 3772  | 4226  | 5197  | 5206  | 6071  | 6355  | 7579  | 6597  | 5492  | 6873  | 3801  | 5441  | 4977  | Arhgef9  |        |
| Arid1a   | 11439 | 13015 | 18195 | 18074 | 19890 | 18974 | 16530 | 15969 | 17795 | 20033 | 25602 | 22177 | 30939 | 24214 | 27842 | 10962 | 12352 | 19873 | 17130 | 21369 | 12812 | 17399 | 27317 | 17807 | 28500 | 27447 | 24255 | 24181 | 27033    | Arid1a |
| Arid1b   | 2629  | 2852  | 3635  | 3920  | 4934  | 3998  | 3461  | 6079  | 7121  | 8755  | 8117  | 8439  | 8062  | 7659  | 2612  | 2875  | 3694  | 3933  | 4574  | 3335  | 3850  | 8341  | 6702  | 8540  | 8845  | 7043  | 6925  | 7510  | Arid1b   |        |
| Arid2    | 8293  | 7351  | 7498  | 8116  | 9654  | 9748  | 10023 | 14153 | 12941 | 13873 | 12552 | 15108 | 14630 | 15310 | 8044  | 7443  | 7932  | 7866  | 9590  | 9193  | 9692  | 13167 | 11934 | 13394 | 14391 | 11777 | 15418 | 14972 | Arid2    |        |
| Arid3a   | 1617  | 1518  | 2550  | 1781  | 1829  | 1455  | 1521  | 1360  | 1411  | 1878  | 1771  | 1831  | 2259  | 2071  | 1377  | 1648  | 2056  | 1756  | 1678  | 1256  | 1490  | 1607  | 1597  | 1957  | 1703  | 2166  | 1951  | 2212  | Arid3a   |        |
| Arid3b   | 2578  | 3043  | 3386  | 2441  | 1999  | 2069  | 1950  | 1252  | 1215  | 1259  | 1191  | 1782  | 1731  | 1770  | 2532  | 2786  | 2977  | 2292  | 2141  | 1911  | 2068  | 1507  | 1154  | 1398  | 1463  | 1892  | 1977  | 1981  | Arid3b   |        |
| Arid3c   | 77    | 74    | 68    | 73    | 70    | 40    | 85    | 23    | 28    | 67    | 26    | 30    | 40    | 40    | 58    | 79    | 81    | 81    | 73    | 75    | 63    | 23    | 19    | 34    | 28    | 40    | 38    | 55    | Arid3c   |        |
| Arid4a   | 4384  | 3876  | 4075  | 4501  | 4022  | 4406  | 4317  | 3791  | 3506  | 3437  | 3475  | 3327  | 2930  | 3561  | 4381  | 4184  | 3964  | 4582  | 3779  | 4386  | 4061  | 3414  | 3168  | 3310  | 3816  | 3006  | 3208  | 3081  | Arid4a   |        |
| Arid4b   | 11661 | 8547  | 8624  | 10338 | 10636 | 11679 | 12040 | 13361 | 11224 | 11042 | 10782 | 12348 | 11649 | 13256 | 11885 | 9463  | 13322 | 10248 | 10244 | 11653 | 11605 | 11496 | 10705 | 10740 | 11783 | 9011  | 12700 | 12100 | Arid4b   |        |
| Arid5a   | 468   | 684   | 578   | 635   | 459   | 457   | 407   | 161   | 232   | 217   | 293   | 147   | 196   | 142   | 447   | 660   | 659   | 672   | 503   | 425   | 473   | 192   | 273   | 204   | 186   | 179   | 145   | 120   | Arid5a   |        |
| Arid5b   | 5501  | 4986  | 5274  | 6157  | 6347  | 5827  | 5575  | 3565  | 3821  | 3849  | 4099  | 3036  | 3763  | 2841  | 5190  | 5343  | 5836  | 6238  | 6347  | 5034  | 5613  | 3474  | 3767  | 3394  | 2898  | 2682  | 2825  | 2851  | Arid5b   |        |
| Ari1     | 18790 | 15979 | 16748 | 18061 | 16503 | 17002 | 18979 | 16546 | 14026 | 14234 | 13743 | 14847 | 14159 | 15564 | 19035 | 17108 | 16811 | 17595 | 16536 | 16900 | 18043 | 16379 | 14038 | 14588 | 15206 | 14790 | 14573 | 16009 | Ari1     |        |
| Ari2     | 6359  | 6632  | 5601  | 6299  | 5453  | 5865  | 5981  | 4513  | 4000  | 4245  | 4350  | 4811  | 4517  | 4739  | 6095  | 5889  | 5806  | 5935  | 5866  | 5890  | 6057  | 3992  | 4099  | 4294  | 4747  | 4820  | 4810  | 4844  | Ari2     |        |
| Ari10    | 10776 | 8349  | 9337  | 8536  | 7976  | 8506  | 8956  | 8526  | 7922  | 6639  | 8278  | 7342  | 7404  | 7776  | 11108 | 10006 | 8659  | 8940  | 7606  | 9254  | 8245  | 7469  | 8527  | 7444  | 7327  | 8293  | 7689  | 7938  | Ari10    |        |
| Ari10    | 843   | 1142  | 1066  | 1200  | 1055  | 1347  | 1163  | 1451  | 1725  | 1615  | 1398  | 1503  | 1450  | 1285  | 944   | 963   | 1333  | 1270  | 1559  | 1450  | 1266  | 1790  | 1689  | 1631  | 1733  | 1389  | 1477  | 1343  | Ari10    |        |
| Ari11    | 7     | 9     | 13    | 9     | 6     | 4     | 16    | 15    | 21    | 21    | 22    | 16    | 14    | 13    | 5     | 7     | 6     | 9     | 12    | 13    | 18    | 33    | 24    | 17    | 10    | 15    | 23    | Ari11 |          |        |
| Ari13b   | 5659  | 4509  | 4801  | 5007  | 4322  | 4666  | 4707  | 2532  | 2494  | 2174  | 2431  | 2173  | 2391  | 2392  | 5343  | 5625  | 4317  | 5188  | 4080  | 4412  | 4487  | 2333  | 2397  | 2201  | 2158  | 2318  | 2074  | 2058  | Ari13b   |        |
| Ari14    | 0     | 0     | 0     | 0     | 0     | 0     | 0     | 0     | 0     | 0     | 0     | 0     | 0     | 0     | 0     | 0     | 0     | 0     | 0     | 0     | 0     | 1     | 0     | 0     | 0     | 0     | 0     | 0     | Ari14    |        |
| Ari14ep  | 5383  | 4294  | 4911  | 4621  | 4795  | 5115  | 5315  | 5639  | 5281  | 5059  | 5362  | 5709  | 5633  | 5986  | 4862  | 4823  | 4946  | 4556  | 4708  | 4991  | 5059  | 5065  | 5288  | 5398  | 4996  | 5437  | 5751  | 6162  | Ari14ep  |        |
| Ari14ep1 | 58    | 22    | 10    | 73    | 9     | 5     | 15    | 150   | 80    | 212   | 143   | 0     | 22    | 27    | 26    | 31    | 20    | 25    | 4     | 8     | 8     | 3     | 113   | 305   | 2     | 257   | 0     | 1     | Ari14ep1 |        |
| Ari15    | 4054  | 3805  | 3636  | 4588  | 4781  | 4233  | 5623  | 4045  | 3345  | 3405  | 3361  | 3438  | 3144  | 3779  | 4376  | 3338  | 4522  | 4661  | 4810  | 5203  | 5093  | 3514  | 3206  | 3636  | 3915  | 3466  | 3385  | 3731  | Ari15    |        |
| Ari16    | 1546  | 1595  | 1589  | 1424  | 1318  | 1298  | 1491  | 999   | 948   | 968   | 902   | 1017  | 1040  | 1014  | 1578  | 1604  | 1510  | 1394  | 1419  | 1427  | 1368  | 1014  | 1041  | 844   | 879   | 1089  | 1119  | 1155  | Ari16    |        |
| Ari2     | 1286  | 1558  | 1641  | 1422  | 1417  | 1410  | 1391  | 2066  | 2348  | 2462  | 2290  | 2300  | 2412  | 2397  | 1291  | 1374  | 1606  | 1370  | 1641  | 1447  | 1468  | 2259  | 2330  | 2455  | 2341  | 2460  | 2515  | 2477  | Ari2     |        |
| Ari2bp   | 8352  | 8796  | 9227  | 8713  | 8309  | 7925  | 9581  | 8206  | 7811  | 8574  | 7579  | 10342 | 9216  | 11541 | 8244  | 7138  | 9327  | 7870  | 8777  | 8220  | 9623  | 8475  | 7497  | 9653  | 9369  | 10996 | 10263 | 11412 | Ari2bp   |        |
| Ari3     | 6082  | 6871  | 7360  | 7449  | 6648  | 6680  | 7649  | 3994  | 4019  | 4723  | 4156  | 4873  | 4258  | 5385  | 6127  | 5816  | 7590  | 6995  | 7425  | 7399  | 7509  | 3945  | 4223  | 5003  | 4923  | 5587  | 4931  | 5438  | Ari3     |        |
| Ari4a    | 6569  | 5780  | 6636  | 6440  | 6620  | 6506  | 7192  | 5733  | 4926  | 4678  | 5372  | 5435  | 4910  | 5393  | 8053  | 6109  | 6091  | 6581  | 5436  | 8375  | 6814  | 6047  | 6470  | 4527  | 5174  | 4474  | 5760  | 5599  | Ari4a    |        |
| Ari4c    | 4688  | 4895  | 5641  | 5854  | 6740  | 6514  | 6094  | 6179  | 5944  | 6920  | 5964  | 6631  | 5905  | 6106  | 5045  | 4424  | 5971  | 5871  | 6937  | 6     |       |       |       |       |       |       |       |       |          |        |



|        |       |       |       |       |       |       |       |       |       |       |       |       |       |       |       |       |       |       |       |       |       |       |       |       |       |       |       |       |        |
|--------|-------|-------|-------|-------|-------|-------|-------|-------|-------|-------|-------|-------|-------|-------|-------|-------|-------|-------|-------|-------|-------|-------|-------|-------|-------|-------|-------|-------|--------|
| Armt1  | 2242  | 2070  | 2439  | 2255  | 1800  | 1944  | 2065  | 1890  | 1776  | 1729  | 1880  | 2317  | 2093  | 2172  | 2171  | 2027  | 2298  | 1998  | 2147  | 2035  | 1844  | 1577  | 1716  | 1861  | 1633  | 2321  | 2259  | 2327  | Armt1  |
| Arnt   | 6730  | 5452  | 6318  | 5439  | 5204  | 5730  | 5446  | 5741  | 5777  | 5992  | 6597  | 5729  | 6233  | 6134  | 5938  | 6571  | 5702  | 5850  | 5046  | 4629  | 5275  | 5566  | 5899  | 5994  | 5647  | 5725  | 5891  | 5930  | Arnt   |
| Arnt2  | 12029 | 13167 | 12569 | 16917 | 19964 | 19067 | 18405 | 19048 | 19466 | 22997 | 19081 | 24969 | 20422 | 24440 | 13264 | 10543 | 15140 | 17006 | 19412 | 15922 | 19126 | 26309 | 16519 | 22282 | 26930 | 18632 | 22086 | 22921 | Arnt2  |
| Arntl  | 1468  | 1716  | 1328  | 1723  | 1587  | 1664  | 1753  | 775   | 843   | 735   | 741   | 682   | 618   | 769   | 1630  | 1593  | 1627  | 1829  | 1509  | 1684  | 1785  | 800   | 827   | 830   | 897   | 886   | 712   | 667   | Arntl  |
| Arntl2 | 664   | 729   | 444   | 755   | 695   | 700   | 706   | 353   | 445   | 442   | 544   | 294   | 405   | 255   | 603   | 707   | 613   | 800   | 604   | 642   | 732   | 361   | 415   | 339   | 342   | 216   | 270   | 230   | Arntl2 |
| Arpc1a | 7627  | 8841  | 7823  | 7874  | 8034  | 7668  | 7782  | 8139  | 8398  | 8415  | 7671  | 8160  | 8218  | 8491  | 7635  | 7675  | 8226  | 7970  | 8391  | 7753  | 8123  | 8158  | 8633  | 8414  | 9027  | 8438  | 8505  | 8537  | Arpc1a |
| Arpc1b | 1735  | 2171  | 2014  | 1468  | 1370  | 1659  | 1018  | 1304  | 1881  | 1472  | 2134  | 1264  | 1771  | 1284  | 1793  | 2390  | 1657  | 1658  | 1342  | 1364  | 1164  | 1394  | 2441  | 1560  | 1431  | 1672  | 1517  | 1400  | Arpc1b |
| Arpc2  | 15763 | 14369 | 14577 | 13849 | 13052 | 13092 | 14661 | 12086 | 11147 | 11214 | 10651 | 11391 | 11075 | 11785 | 15730 | 14319 | 13965 | 13760 | 13499 | 14216 | 14582 | 11256 | 11595 | 10883 | 11226 | 12409 | 11037 | 12045 | Arpc2  |
| Arpc3  | 6712  | 8986  | 8296  | 8394  | 7511  | 7940  | 7365  | 6847  | 7262  | 6626  | 6391  | 6130  | 6843  | 6483  | 7882  | 8063  | 8013  | 8013  | 8208  | 10064 | 7497  | 5708  | 7025  | 6823  | 7169  | 7268  | 7181  | 6608  | Arpc3  |
| Arpc4  | 5758  | 5852  | 6857  | 6426  | 5618  | 5246  | 6124  | 4250  | 4359  | 5024  | 4891  | 5070  | 4974  | 5644  | 5430  | 5312  | 6343  | 5984  | 5910  | 4760  | 6379  | 4625  | 4765  | 5245  | 5032  | 5911  | 5033  | 5899  | Arpc4  |
| Arpc5  | 11344 | 9862  | 11630 | 11507 | 12245 | 11227 | 13255 | 10235 | 9059  | 9535  | 9050  | 9538  | 9656  | 10261 | 12554 | 11416 | 12135 | 11959 | 12293 | 12026 | 12940 | 11084 | 9565  | 9771  | 10642 | 10181 | 9932  | 10325 | Arpc5  |
| Arpc5l | 6035  | 5740  | 5949  | 5894  | 5215  | 5268  | 5989  | 4471  | 3733  | 4106  | 3896  | 4434  | 4082  | 4494  | 5809  | 5079  | 6042  | 5701  | 5319  | 5366  | 5676  | 4259  | 3691  | 4389  | 4319  | 4840  | 4240  | 4586  | Arpc5l |
| Arpin  | 826   | 844   | 978   | 627   | 740   | 692   | 593   | 1243  | 1225  | 991   | 1151  | 1312  | 1272  | 1408  | 928   | 745   | 853   | 616   | 711   | 657   | 618   | 1173  | 1185  | 1178  | 1121  | 1365  | 1481  | 1525  | Arpin  |
| Arpp19 | 20455 | 16397 | 17905 | 17166 | 16368 | 17230 | 19081 | 15430 | 13055 | 12818 | 12624 | 13484 | 12959 | 14725 | 21089 | 17284 | 17796 | 16766 | 16523 | 19373 | 17963 | 13050 | 12960 | 12923 | 13507 | 14189 | 14207 | 14597 | Arpp19 |
| Arpp21 | 158   | 139   | 108   | 245   | 542   | 365   | 421   | 935   | 1149  | 1119  | 1658  | 540   | 561   | 589   | 212   | 159   | 243   | 320   | 388   | 394   | 405   | 1153  | 1478  | 780   | 1149  | 433   | 431   | 409   | Arpp21 |
| Arr3   | 1     | 7     | 0     | 2     | 0     | 8     | 0     | 5     | 2     | 5     | 6     | 9     | 10    | 0     | 0     | 5     | 2     | 0     | 2     | 5     | 3     | 0     | 8     | 0     | 4     | 0     | 0     | 0     | Arr3   |
| Arrb1  | 4865  | 5352  | 4862  | 5852  | 8759  | 7151  | 6044  | 7780  | 7953  | 10173 | 9079  | 7871  | 8930  | 7564  | 5507  | 5963  | 6057  | 6336  | 7148  | 6051  | 6982  | 11242 | 7822  | 8017  | 11051 | 4936  | 7838  | 7860  | Arrb1  |
| Arrb2  | 3372  | 4591  | 4677  | 5032  | 4689  | 4169  | 4480  | 2961  | 6287  | 3422  | 3234  | 3362  | 3266  | 3506  | 3483  | 3555  | 5043  | 4812  | 5104  | 4037  | 5025  | 3399  | 2869  | 3702  | 3493  | 3729  | 3230  | 3595  | Arrb2  |
| Arrdc1 | 1475  | 1821  | 1578  | 1683  | 1752  | 1615  | 1591  | 652   | 778   | 766   | 635   | 577   | 575   | 533   | 1393  | 1611  | 1739  | 1700  | 1833  | 1575  | 1434  | 702   | 801   | 691   | 608   | 813   | 552   | 526   | Arrdc1 |
| Arrdc2 | 61    | 30    | 76    | 17    | 59    | 15    | 18    | 43    | 9     | 41    | 5     | 12    | 28    | 4     | 83    | 63    | 17    | 48    | 13    | 90    | 34    | 13    | 11    | 52    | 38    | 39    | 31    | 8     | Arrdc2 |
| Arrdc3 | 6481  | 3972  | 4939  | 4956  | 4489  | 4792  | 5555  | 6900  | 8759  | 6776  | 7628  | 7667  | 7083  | 7070  | 7243  | 4946  | 4723  | 4981  | 3848  | 5160  | 4555  | 6087  | 8889  | 7073  | 6318  | 7499  | 6130  | 6490  | Arrdc3 |
| Arrdc4 | 3184  | 2878  | 3225  | 3230  | 3077  | 2834  | 3073  | 3718  | 3554  | 3097  | 3097  | 2598  | 2799  | 2429  | 3299  | 2969  | 3113  | 3411  | 2951  | 3040  | 3095  | 3840  | 3722  | 2929  | 3152  | 2781  | 2781  | 2263  | Arrdc4 |
| Arrdc5 | 0     | 1     | 0     | 1     | 0     | 0     | 2     | 0     | 0     | 0     | 0     | 0     | 0     | 0     | 0     | 8     | 1     | 0     | 0     | 1     | 0     | 0     | 0     | 2     | 0     | 0     | 0     | 0     | Arrdc5 |
| Arsa   | 1004  | 1449  | 1470  | 1375  | 1520  | 1301  | 1248  | 1149  | 1424  | 1532  | 1548  | 1222  | 1202  | 1195  | 1205  | 1333  | 1483  | 1477  | 1441  | 1188  | 1277  | 1474  | 1645  | 1459  | 1206  | 1288  | 1016  | 1043  | Arsa   |
| Arsb   | 1363  | 1201  | 1319  | 1136  | 1072  | 1370  | 976   | 1762  | 2363  | 1929  | 2442  | 1933  | 1812  | 1796  | 1245  | 1367  | 1162  | 1269  | 1048  | 1002  | 1071  | 2151  | 2487  | 1865  | 1833  | 1865  | 1819  | 1729  | Arsb   |
| Arg    | 482   | 540   | 453   | 346   | 414   | 435   | 332   | 430   | 405   | 414   | 458   | 348   | 463   | 331   | 475   | 523   | 381   | 386   | 292   | 370   | 379   | 463   | 651   | 340   | 302   | 397   | 368   | 348   | Arg    |
| Arsi   | 187   | 205   | 231   | 303   | 253   | 467   | 131   | 402   | 715   | 667   | 1138  | 452   | 583   | 416   | 214   | 183   | 260   | 470   | 227   | 192   | 170   | 959   | 999   | 659   | 680   | 372   | 451   | 350   | Arsi   |
| Arsj   | 23    | 19    | 16    | 32    | 5     | 32    | 6     | 62    | 149   | 56    | 146   | 45    | 68    | 39    | 46    | 44    | 28    | 37    | 16    | 14    | 4     | 95    | 131   | 63    | 47    | 45    | 29    | 43    | Arsj   |
| Arsk   | 862   | 619   | 744   | 689   | 585   | 652   | 721   | 905   | 976   | 769   | 959   | 833   | 921   | 750   | 769   | 748   | 782   | 683   | 625   | 782   | 634   | 829   | 1074  | 757   | 800   | 818   | 824   | 807   | Arsk   |
| Art1   | 8     | 3     | 6     | 1     | 8     | 1     | 7     | 24    | 46    | 27    | 194   | 8     | 28    | 18    | 5     | 9     | 0     | 2     | 4     | 5     | 4     | 40    | 140   | 12    | 4     | 24    | 19    | 23    | Art1   |
| Art3   | 16    | 25    | 27    | 28    | 70    | 45    | 37    | 59    | 82    | 58    | 89    | 41    | 65    | 60    | 33    | 42    | 30    | 46    | 44    | 42    | 42    | 104   | 93    | 50    | 90    | 47    | 62    | 38    | Art3   |
| Art4   | 33    | 24    | 28    | 9     | 6     | 16    | 3     | 81    | 101   | 57    | 117   | 80    | 115   | 72    | 32    | 41    | 7     | 13    | 2     | 3     | 18    | 125   | 92    | 15    | 60    | 56    | 133   | Art4  |        |
| Art5   | 78    | 71    | 67    | 39    | 52    | 62    | 63    | 49    | 60    | 41    | 84    | 71    | 50    | 68    | 69    | 49    | 74    | 34    | 48    | 55    | 52    | 38    | 60    | 56    | 80    | 79    | 78    | 68    | Art5   |
| Artn   | 24    | 58    | 42    | 42    | 25    | 34    | 27    | 17    | 49    | 26    | 47    | 12    | 23    | 20    | 22    | 45    | 57    | 36    | 41    | 41    | 29    | 35    | 32    | 29    | 9     | 20    | 17    | 21    | Artn   |
| Arv1   | 1296  | 1384  | 1012  | 1235  | 1222  | 1446  | 1274  | 1116  | 1131  | 1142  | 1085  | 1315  | 1143  | 1278  | 1213  | 1251  | 1137  | 1350  | 1276  | 1255  | 1304  | 1285  | 1069  | 1209  | 1356  | 1029  | 1421  | 1206  | Arv1   |
| Arx    | 2141  | 2113  | 2436  | 3383  | 3050  | 2844  | 4383  | 2514  | 2927  | 3497  | 2320  | 5153  | 1039  | 5803  | 1760  | 875   | 3153  | 2981  | 3843  | 2612  | 3866  | 3335  | 1582  | 5184  | 4580  | 6255  | 3270  | 4535  | Arx    |
| Arxes1 | 1423  | 1102  | 1299  | 1563  | 1963  | 1804  | 2094  | 1553  | 1299  | 1310  | 1295  | 1095  | 1201  | 1525  | 1569  | 1153  | 1451  | 1670  | 1753  | 1721  | 2003  | 1335  | 1392  | 1392  | 1490  | 1288  | 1197  | 1327  | Arxes1 |
| Arxes2 | 3460  | 2602  | 3148  | 3490  | 4368  | 4117  | 4567  | 4087  | 3095  | 2997  | 2676  | 3120  | 2862  | 3242  | 4188  | 3169  | 3494  | 3779  | 4068  | 5111  | 4382  | 4244  | 3312  | 3215  | 3252  | 3052  | 3116  | 3305  | Arxes2 |
| As3mt  | 623   | 676   | 706   | 529   | 632   | 585   | 497   | 1194  | 1137  | 1007  | 1171  | 1097  | 1252  | 1065  | 696   | 660   | 651   | 551   | 553   | 732   | 583   | 1071  | 1074  | 945   | 1102  | 1038  | 1167  | 1031  | As3mt  |
| Asah1  | 11003 | 9193  | 9765  | 8545  | 7839  | 8637  | 8726  | 5951  | 5128  | 4533  | 4931  | 5175  | 5316  | 5467  | 12012 | 10770 | 8700  | 8484  | 7819  | 9716  | 8557  | 5210  | 5545  | 4739  | 4840  | 5631  | 5657  | 5844  | Asah1  |
| Asah2  | 266   | 129   | 250   | 125   | 243   | 282   | 188   | 446   | 616   | 427   | 738   | 363   | 460   | 314   | 280   | 312   | 155   | 197   | 147   | 185   | 157   | 528   | 690   | 399   | 382   | 348   | 344   | 299   | Asah2  |
| Asap1  | 6177  | 6308  | 6483  | 6480  | 7513  | 6480  | 6462  | 5937  | 6283  | 6979  | 7160  | 6879  | 7523  | 6642  | 6783  | 7380  | 7050  | 6958  | 6772  | 5534  | 6343  | 7780  | 6097  | 6414  | 6592  | 6539  | 6430  | 6741  | Asap1  |
| Asap2  | 3853  | 3733  | 4920  | 5106  | 5811  | 5041  | 5136  | 4324  | 4504  | 5785  | 5169  | 6571  | 5420  | 6388  | 3669  | 3820  | 4582  | 4911  | 5666  | 3939  | 5199  | 5504  | 4106  | 5979  | 5817  | 5737  | 5531  | 5893  | Asap2  |
| Asap3  | 2505  | 2831  | 2921  | 2633  | 2461  | 2284  | 1943  | 1047  | 1336  | 1440  | 1831  | 1099  | 1184  | 948   | 2326  | 2836  | 2870  | 2732  | 2436  | 2011  | 2175  | 1358  | 1730  | 1151  | 1010  | 1153  | 1147  | 1008  | Asap3  |
| Asb1   | 5150  | 5770  | 3988  | 4611  | 4377  | 4597  | 4539  | 3306  | 3149  | 2830  | 2915  | 3061  | 3083  | 2921  | 5283  | 5263  | 4465  | 4873  | 4526  | 4729  | 4574  | 3402  | 2915  | 2626  | 3322  | 2545  | 3221  | 2924  | Asb1   |
| Asb10  | 1     | 4     | 6     | 5     | 4     | 0     | 6     | 18    | 27    | 10    | 31    | 17    | 16    | 10    | 5     | 8     | 0     | 0     | 5     | 5     | 3     | 10    | 39    | 12    | 4     | 7     | 3     | 13    | Asb10  |
| Asb11  | 3     | 3     | 3     | 1     | 2     | 2     | 2     | 1     | 2     | 0     | 1     | 3     | 2     | 3     | 4     | 2     | 3     | 12    | 4     | 9     | 7     | 3     | 1     | 2     | 3     | 4     | 8     | 1     | Asb11  |
| Asb12  | 3     | 11    | 3     | 1     | 11    | 2     | 12    | 5     | 4     | 4     | 2     | 5     | 5     | 7     | 8     | 5     | 12    | 9     | 13    | 7     | 6     | 0     | 2     | 9     | 3     | 8     | 2     | 9     | Asb12  |
| Asb13  | 1136  | 1037  | 1109  | 1194  | 1412  | 1215  | 1388  | 1600  | 1383  | 1728  | 1563  | 1769  | 1673  | 1893  | 990   | 942   | 1187  | 1196  | 1365  | 1229  |       |       |       |       |       |       |       |       |        |



|         |       |       |       |       |       |       |       |       |       |       |       |       |       |       |       |       |       |       |       |       |       |       |       |       |       |       |       |       |         |       |
|---------|-------|-------|-------|-------|-------|-------|-------|-------|-------|-------|-------|-------|-------|-------|-------|-------|-------|-------|-------|-------|-------|-------|-------|-------|-------|-------|-------|-------|---------|-------|
| Asic4   | 959   | 1284  | 1844  | 1970  | 2242  | 1805  | 1530  | 1882  | 1364  | 2350  | 1761  | 2751  | 2824  | 2674  | 1143  | 1009  | 1876  | 1629  | 2332  | 1882  | 2120  | 2687  | 1520  | 2815  | 2700  | 721   | 2987  | 2886  | Asic4   |       |
| Asic5   | 0     | 3     | 0     | 0     | 2     | 6     | 3     | 1     | 4     | 0     | 3     | 7     | 3     | 3     | 0     | 2     | 0     | 2     | 1     | 7     | 3     | 3     | 0     | 4     | 0     | 3     | 1     | 1     | 1       | Asic5 |
| Asl     | 1801  | 2515  | 2225  | 2203  | 2018  | 2120  | 1686  | 978   | 959   | 864   | 1030  | 1056  | 1133  | 958   | 1875  | 2225  | 1991  | 2086  | 2092  | 2091  | 1928  | 984   | 1072  | 978   | 1156  | 1142  | 1069  | 985   | Asl     |       |
| Asmt    | 1     | 1     | 1     | 1     | 2     | 3     | 3     | 4     | 8     | 5     | 5     | 9     | 10    | 6     | 0     | 1     | 5     | 2     | 8     | 1     | 1     | 10    | 8     | 13    | 9     | 17    | 3     | 9     | Asmt    |       |
| Asns    | 3922  | 3746  | 2922  | 2785  | 2910  | 2910  | 3042  | 2356  | 2349  | 1960  | 1922  | 1631  | 1958  | 2033  | 3893  | 3733  | 2751  | 2960  | 2907  | 3232  | 2917  | 2067  | 2263  | 1712  | 1803  | 2070  | 1873  | 2445  | Asns    |       |
| Asnsd1  | 290   | 251   | 242   | 195   | 145   | 135   | 287   | 316   | 216   | 204   | 188   | 239   | 248   | 469   | 351   | 204   | 218   | 190   | 139   | 205   | 269   | 221   | 226   | 258   | 224   | 238   | 229   | 399   | Asnsd1  |       |
| Aspa    | 15    | 17    | 0     | 0     | 34    | 11    | 12    | 27    | 30    | 36    | 50    | 17    | 28    | 13    | 17    | 16    | 6     | 25    | 4     | 12    | 17    | 52    | 62    | 11    | 19    | 6     | 3     | 6     | Aspa    |       |
| Aspdh   | 163   | 282   | 327   | 373   | 417   | 455   | 360   | 402   | 430   | 530   | 364   | 603   | 493   | 568   | 202   | 205   | 431   | 483   | 528   | 384   | 407   | 732   | 366   | 575   | 707   | 409   | 502   | 539   | Aspdh   |       |
| Aspg    | 96    | 111   | 129   | 72    | 52    | 75    | 34    | 27    | 47    | 47    | 44    | 37    | 77    | 40    | 58    | 124   | 136   | 80    | 55    | 47    | 37    | 45    | 69    | 43    | 38    | 58    | 66    | 63    | Aspg    |       |
| Asph    | 9357  | 7381  | 8114  | 6933  | 6243  | 7096  | 5727  | 6283  | 6793  | 5965  | 7673  | 5689  | 7775  | 5873  | 9330  | 9965  | 7174  | 6974  | 5611  | 6170  | 5560  | 5633  | 7453  | 6071  | 5175  | 6258  | 5999  | 5936  | Asph    |       |
| Asphd1  | 143   | 168   | 195   | 294   | 457   | 349   | 312   | 316   | 358   | 500   | 444   | 399   | 298   | 328   | 161   | 110   | 336   | 292   | 403   | 284   | 338   | 536   | 339   | 494   | 569   | 306   | 356   | 399   | Asphd1  |       |
| Asphd2  | 2941  | 4165  | 3178  | 3937  | 4130  | 3964  | 3921  | 2317  | 2448  | 2454  | 1989  | 2648  | 2216  | 2255  | 3334  | 3067  | 3664  | 3772  | 4508  | 4354  | 4219  | 2490  | 2094  | 2466  | 2654  | 2154  | 2227  | 2070  | Asphd2  |       |
| Aspm    | 11770 | 10811 | 6872  | 7073  | 5932  | 7877  | 8335  | 12822 | 11016 | 7804  | 7720  | 12511 | 10819 | 12666 | 11020 | 9495  | 6749  | 6231  | 6816  | 10298 | 8340  | 5715  | 9183  | 8322  | 8926  | 8736  | 14346 | 11459 | Aspm    |       |
| Aspn    | 167   | 105   | 41    | 279   | 67    | 571   | 15    | 1480  | 2016  | 1585  | 2814  | 563   | 569   | 622   | 237   | 178   | 123   | 556   | 75    | 46    | 24    | 1482  | 3565  | 1366  | 1322  | 545   | 471   | 482   | Aspn    |       |
| Asprv1  | 43    | 45    | 32    | 48    | 49    | 46    | 45    | 83    | 131   | 97    | 83    | 50    | 61    | 81    | 26    | 43    | 29    | 50    | 37    | 41    | 54    | 33    | 143   | 96    | 69    | 62    | 52    | 55    | Asprv1  |       |
| Aspscr1 | 2366  | 2909  | 2868  | 2980  | 2792  | 2852  | 2522  | 3366  | 3888  | 3709  | 3530  | 4029  | 3867  | 3888  | 2554  | 2512  | 3034  | 2717  | 2920  | 2848  | 2791  | 3710  | 3735  | 3948  | 3832  | 4282  | 4285  | 3890  | Aspscr1 |       |
| Asrgl1  | 3914  | 4205  | 3600  | 3950  | 4358  | 4010  | 4626  | 2463  | 2389  | 2313  | 2112  | 2474  | 1889  | 2380  | 3823  | 3160  | 4222  | 4127  | 4251  | 4206  | 4408  | 2174  | 1910  | 2344  | 2400  | 2701  | 2160  | 2265  | Asrgl1  |       |
| Ass1    | 272   | 298   | 189   | 166   | 174   | 120   | 107   | 177   | 213   | 151   | 179   | 174   | 204   | 151   | 270   | 322   | 192   | 168   | 121   | 100   | 120   | 154   | 247   | 183   | 144   | 164   | 185   | 161   | Ass1    |       |
| Aste1   | 1318  | 1325  | 984   | 1211  | 973   | 1100  | 1117  | 1033  | 907   | 828   | 707   | 818   | 790   | 852   | 1189  | 1255  | 1056  | 1188  | 996   | 1293  | 1194  | 703   | 845   | 727   | 761   | 699   | 945   | 833   | Aste1   |       |
| Astl    | 1     | 1     | 1     | 0     | 0     | 0     | 1     | 5     | 5     | 3     | 2     | 0     | 1     | 2     | 0     | 2     | 1     | 0     | 0     | 0     | 0     | 0     | 5     | 0     | 0     | 0     | 1     | 1     | Astl    |       |
| Astn1   | 6577  | 6385  | 5452  | 8195  | 10762 | 10748 | 10523 | 12193 | 11761 | 12611 | 10500 | 12055 | 10735 | 11819 | 7671  | 5752  | 7011  | 8817  | 9919  | 9823  | 11366 | 15024 | 9976  | 11272 | 14350 | 8224  | 11702 | 10595 | Astn1   |       |
| Astn2   | 1152  | 1248  | 1100  | 1816  | 2389  | 1927  | 1672  | 1685  | 1851  | 2254  | 2076  | 1624  | 1909  | 1578  | 1304  | 1238  | 1387  | 2168  | 1896  | 1402  | 1996  | 2665  | 1916  | 1707  | 2055  | 1339  | 1502  | 1475  | Astn2   |       |
| Asx1    | 7019  | 6966  | 7952  | 8339  | 9025  | 8504  | 8555  | 9308  | 9863  | 10991 | 10362 | 12761 | 12507 | 12832 | 6691  | 6514  | 8314  | 8263  | 9262  | 6630  | 9092  | 11294 | 8999  | 10729 | 11283 | 10371 | 12776 | 12589 | Asx1    |       |
| Asx2    | 4926  | 3736  | 3185  | 3938  | 4234  | 4699  | 4662  | 4539  | 4352  | 4215  | 4478  | 4622  | 4695  | 4846  | 4741  | 3989  | 3537  | 3796  | 3970  | 4345  | 4482  | 3634  | 4078  | 3715  | 4437  | 3328  | 4855  | 4186  | Asx2    |       |
| Asx3    | 4106  | 3654  | 2710  | 3583  | 4234  | 4785  | 4324  | 7342  | 7217  | 7223  | 7228  | 5975  | 7347  | 6220  | 4146  | 4094  | 3027  | 3434  | 3867  | 3888  | 4539  | 7158  | 6499  | 5279  | 7092  | 4211  | 6627  | 5626  | Asx3    |       |
| Asz1    | 0     | 0     | 0     | 2     | 0     | 0     | 0     | 0     | 0     | 1     | 0     | 0     | 0     | 0     | 0     | 0     | 0     | 0     | 0     | 0     | 2     | 0     | 0     | 0     | 0     | 0     | 0     | 0     | Asz1    |       |
| Atad1   | 11344 | 9192  | 10403 | 10340 | 10531 | 10665 | 11957 | 13065 | 10411 | 9579  | 9159  | 10457 | 9992  | 10863 | 12922 | 10622 | 10384 | 10210 | 10395 | 13414 | 11042 | 11486 | 10545 | 9988  | 10462 | 10699 | 10928 | 11136 | Atad1   |       |
| Atad2   | 0     | 0     | 0     | 0     | 0     | 0     | 0     | 0     | 0     | 0     | 0     | 1     | 0     | 0     | 0     | 0     | 0     | 1     | 0     | 0     | 0     | 0     | 0     | 0     | 0     | 0     | 1     | 0     | Atad2   |       |
| Atad2b  | 5708  | 4333  | 4632  | 5158  | 5985  | 6136  | 5995  | 10555 | 8932  | 9856  | 9745  | 10736 | 10350 | 10895 | 5570  | 5068  | 4894  | 5056  | 5699  | 5420  | 5819  | 9875  | 8484  | 8921  | 10416 | 7648  | 11152 | 10153 | Atad2b  |       |
| Atad3a  | 4883  | 5859  | 5712  | 6040  | 5114  | 4928  | 5207  | 3105  | 3798  | 3938  | 3831  | 4607  | 4230  | 4202  | 4512  | 5531  | 5651  | 5760  | 5400  | 4625  | 5182  | 3534  | 3412  | 4276  | 4050  | 4789  | 4105  | 4453  | Atad3a  |       |
| Atad5   | 9281  | 7264  | 6084  | 6214  | 5175  | 6832  | 7585  | 5619  | 5087  | 4272  | 4251  | 6111  | 5324  | 6088  | 8784  | 7547  | 5917  | 6265  | 5541  | 7766  | 6783  | 3805  | 4343  | 4529  | 4674  | 5097  | 6528  | 5873  | Atad5   |       |
| Ata1    | 9806  | 11901 | 11974 | 17282 | 18858 | 16302 | 17763 | 13166 | 13428 | 18658 | 14533 | 17706 | 14149 | 17440 | 10172 | 10248 | 16171 | 17511 | 19601 | 13372 | 18743 | 22257 | 12393 | 17714 | 19842 | 14584 | 13933 | 15599 | Ata1    |       |
| Atcay   | 3809  | 5495  | 5246  | 7212  | 9348  | 8133  | 7625  | 7507  | 8131  | 9542  | 7418  | 8292  | 6761  | 8240  | 4909  | 4201  | 7013  | 7542  | 9524  | 7916  | 8519  | 10591 | 7431  | 8865  | 11342 | 6919  | 7637  | 7430  | Atcay   |       |
| Ate1    | 5301  | 5135  | 5092  | 5704  | 6181  | 6029  | 6279  | 6017  | 5236  | 5243  | 5252  | 5303  | 5034  | 5443  | 5768  | 5312  | 5475  | 6195  | 5690  | 6091  | 6255  | 6204  | 5239  | 5138  | 5705  | 4453  | 5120  | 5234  | Ate1    |       |
| Atf1    | 870   | 714   | 1332  | 913   | 889   | 946   | 853   | 1911  | 1879  | 2168  | 2209  | 2621  | 2456  | 2543  | 815   | 761   | 1109  | 852   | 1111  | 798   | 870   | 1980  | 1895  | 2510  | 2276  | 3458  | 2551  | 2715  | Atf1    |       |
| Atf2    | 7978  | 6488  | 8180  | 7907  | 8609  | 8376  | 8982  | 9274  | 8239  | 8341  | 7904  | 9231  | 8777  | 9678  | 7975  | 7727  | 8327  | 8187  | 8348  | 8312  | 8368  | 9984  | 7996  | 8697  | 9484  | 9093  | 9136  | 9280  | Atf2    |       |
| Atf3    | 300   | 343   | 432   | 266   | 124   | 195   | 159   | 94    | 101   | 82    | 107   | 73    | 87    | 76    | 266   | 322   | 275   | 173   | 132   | 166   | 177   | 72    | 115   | 95    | 88    | 124   | 89    | 88    | Atf3    |       |
| Atf4    | 6149  | 7525  | 6927  | 6421  | 5731  | 6070  | 6216  | 8249  | 7949  | 6932  | 7611  | 8711  | 8387  | 9296  | 6158  | 6171  | 6743  | 5900  | 6373  | 6508  | 5947  | 7563  | 7596  | 8373  | 8272  | 9723  | 8947  | 9556  | Atf4    |       |
| Atf5    | 1888  | 2085  | 1981  | 2790  | 1667  | 1586  | 1466  | 2512  | 2600  | 3545  | 3137  | 2435  | 2233  | 2521  | 1610  | 1640  | 2066  | 1681  | 2091  | 1613  | 1643  | 1706  | 2758  | 4554  | 2212  | 4853  | 2249  | 2478  | Atf5    |       |
| Atf6    | 7709  | 7482  | 5565  | 6413  | 5933  | 6419  | 6358  | 3689  | 3138  | 3242  | 3302  | 3214  | 3385  | 3318  | 7473  | 7212  | 5733  | 6147  | 5837  | 6170  | 6478  | 3183  | 3329  | 2787  | 3215  | 2468  | 3375  | 3232  | Atf6    |       |
| Atf6b   | 4534  | 5948  | 6145  | 6075  | 5509  | 5121  | 4785  | 4408  | 5188  | 5674  | 5235  | 5941  | 5177  | 5455  | 4415  | 4984  | 6198  | 5766  | 5991  | 4514  | 5079  | 5217  | 5138  | 6069  | 5528  | 6517  | 5227  | 5478  | Atf6b   |       |
| Atf7    | 3179  | 2983  | 2187  | 3040  | 3287  | 3164  | 3067  | 3770  | 4022  | 3655  | 4779  | 3128  | 3757  | 3294  | 3117  | 3209  | 2301  | 3226  | 2834  | 2766  | 3202  | 3611  | 4132  | 3009  | 3614  | 2536  | 3470  | 3023  | Atf7    |       |
| Atf7ip  | 9806  | 8881  | 9030  | 10906 | 12029 | 12023 | 12187 | 14883 | 15935 | 17520 | 16736 | 18558 | 18394 | 17945 | 9394  | 9829  | 10247 | 11280 | 12368 | 10196 | 11976 | 17776 | 14595 | 17084 | 18945 | 13826 | 17845 | 17514 | Atf7ip  |       |
| Atf7ip2 | 360   | 189   | 231   | 99    | 88    | 107   | 108   | 93    | 95    | 60    | 76    | 83    | 122   | 99    | 235   | 271   | 173   | 106   | 60    | 107   | 96    | 43    | 92    | 83    | 49    | 112   | 130   | 101   | Atf7ip2 |       |
| Atg10   | 298   | 257   | 245   | 265   | 293   | 305   | 311   | 503   | 421   | 423   | 428   | 414   | 424   | 516   | 348   | 266   | 297   | 222   | 219   | 302   | 259   | 436   | 447   | 378   | 400   | 531   | 447   | 472   | Atg10   |       |
| Atg101  | 1983  | 2857  | 2159  | 2434  | 1793  | 1903  | 1743  | 1501  | 1562  | 1477  | 1383  | 1517  | 1441  | 1327  | 1905  | 2361  | 2385  | 2253  | 2037  | 2140  | 1772  | 1308  | 1467  | 1729  | 1576  | 1708  | 1539  | 1392  | Atg101  |       |
| Atg12   | 10242 | 10819 | 9197  | 10354 | 9076  | 8670  | 10457 | 7891  | 6329  | 5916  | 5561  | 6584  | 6203  | 6508  | 12063 | 10834 | 9775  | 10463 | 8747  | 11090 | 9507  | 6876  | 6297  | 5932  | 6680  | 6088  | 6607  | 6722  | Atg12   |       |
| Atg13   | 4767  | 5425  | 4898  | 5549  | 5196  | 5235  | 5342  | 3497  | 3683  | 3984  | 3791  | 3937  | 3943  | 3856  | 4847  | 5079  | 5208  | 5564  | 5329  | 4827  | 5491  | 4025  | 3586  | 3765  | 4358  |       |       |       |         |       |

|          |       |       |       |       |       |        |       |       |       |       |       |       |       |       |       |       |       |       |       |       |       |       |       |       |       |       |       |          |         |
|----------|-------|-------|-------|-------|-------|--------|-------|-------|-------|-------|-------|-------|-------|-------|-------|-------|-------|-------|-------|-------|-------|-------|-------|-------|-------|-------|-------|----------|---------|
| Atp12a   | 16    | 6     | 10    | 2     | 5     | 1      | 7     | 4     | 8     | 8     | 13    | 3     | 9     | 9     | 11    | 3     | 7     | 4     | 4     | 5     | 6     | 7     | 14    | 14    | 11    | 3     | 2     | 17       | Atp12a  |
| Atp13a1  | 5520  | 6672  | 6242  | 6638  | 6431  | 6050   | 6112  | 5297  | 6164  | 6013  | 5792  | 6637  | 6038  | 5801  | 5329  | 6154  | 6439  | 6489  | 6666  | 5669  | 5917  | 6315  | 5834  | 6283  | 6418  | 6206  | 6186  | 6107     | Atp13a1 |
| Atp13a2  | 7041  | 9898  | 9504  | 11670 | 12851 | 10421  | 9137  | 5907  | 7158  | 8181  | 7444  | 7342  | 6484  | 5958  | 7508  | 8759  | 10856 | 11975 | 12478 | 8707  | 9849  | 8676  | 6594  | 7620  | 8289  | 6693  | 6288  | 5671     | Atp13a2 |
| Atp13a3  | 13755 | 10025 | 10101 | 12354 | 12084 | 13184  | 14067 | 7558  | 7009  | 6601  | 8098  | 7379  | 7005  | 7731  | 12957 | 12606 | 11038 | 12682 | 11461 | 11309 | 13495 | 7331  | 7237  | 6998  | 7158  | 6244  | 7252  | 7444     | Atp13a3 |
| Atp13a4  | 3     | 7     | 5     | 4     | 13    | 25     | 15    | 50    | 41    | 35    | 31    | 29    | 18    | 42    | 11    | 6     | 6     | 17    | 16    | 21    | 20    | 42    | 47    | 23    | 48    | 47    | 27    | 34       | Atp13a4 |
| Atp13a5  | 17    | 22    | 1     | 15    | 43    | 25     | 20    | 59    | 41    | 63    | 101   | 35    | 27    | 20    | 24    | 14    | 12    | 9     | 19    | 20    | 34    | 69    | 76    | 38    | 42    | 44    | 19    | 24       | Atp13a5 |
| Atp1a1   | 12978 | 15129 | 15311 | 13874 | 14087 | 13037  | 11778 | 11375 | 12687 | 12541 | 13407 | 12211 | 13021 | 11082 | 13239 | 15118 | 14394 | 14425 | 13881 | 12221 | 12528 | 12226 | 14350 | 11807 | 10904 | 13615 | 12455 | 12208    | Atp1a1  |
| Atp1a2   | 1843  | 2401  | 2094  | 3279  | 6250  | 4441   | 4012  | 5616  | 6708  | 7133  | 7276  | 4670  | 4829  | 4611  | 2529  | 2076  | 2613  | 4192  | 4959  | 4476  | 4773  | 7758  | 8643  | 6037  | 7576  | 3966  | 4241  | 3628     | Atp1a2  |
| Atp1a3   | 6921  | 10726 | 10939 | 20554 | 25269 | 19270  | 17242 | 9714  | 11536 | 17266 | 13050 | 11752 | 9538  | 10095 | 8426  | 8168  | 17685 | 22503 | 24695 | 14939 | 21688 | 20100 | 10519 | 13817 | 18114 | 9554  | 8459  | 9207     | Atp1a3  |
| Atp1a4   | 7     | 12    | 4     | 8     | 18    | 14     | 9     | 18    | 11    | 8     | 9     | 8     | 3     | 11    | 16    | 9     | 7     | 8     | 8     | 14    | 13    | 8     | 6     | 10    | 14    | 6     | 22    | 6        | Atp1a4  |
| Atp1b1   | 3073  | 3519  | 4356  | 5523  | 7480  | 5653   | 5396  | 4316  | 3541  | 4606  | 4377  | 3269  | 3763  | 3154  | 4138  | 3404  | 5087  | 5591  | 5885  | 5369  | 5870  | 6041  | 4148  | 3653  | 4609  | 2874  | 3129  | 3185     | Atp1b1  |
| Atp1b2   | 2829  | 3276  | 3973  | 4105  | 4739  | 3917   | 4138  | 1754  | 2142  | 2703  | 2387  | 2088  | 1793  | 2004  | 3090  | 3216  | 4325  | 4469  | 4567  | 3293  | 4366  | 3293  | 2551  | 2344  | 2756  | 1872  | 1541  | 1861     | Atp1b2  |
| Atp1b3   | 10555 | 9764  | 10927 | 10026 | 9685  | 9417   | 10778 | 8007  | 6921  | 7407  | 7271  | 7983  | 7922  | 8328  | 10797 | 9944  | 10298 | 10121 | 9949  | 10429 | 10154 | 8154  | 7607  | 7976  | 7587  | 8793  | 8318  | 8578     | Atp1b3  |
| Atp1b4   | 5     | 2     | 1     | 4     | 2     | 1      | 4     | 13    | 21    | 3     | 420   | 3     | 0     | 0     | 4     | 2     | 17    | 9     | 0     | 0     | 5     | 13    | 276   | 3     | 2     | 0     | 0     | 0        | Atp1b4  |
| Atp2a1   | 1129  | 1160  | 1164  | 1095  | 917   | 964    | 980   | 466   | 444   | 486   | 388   | 527   | 462   | 449   | 1077  | 1218  | 1169  | 1268  | 890   | 1046  | 932   | 434   | 432   | 458   | 387   | 609   | 510   | 484      | Atp2a1  |
| Atp2a2   | 138   | 57    | 50    | 60    | 37    | 46     | 36    | 131   | 340   | 45    | 2125  | 47    | 92    | 23    | 84    | 181   | 63    | 73    | 34    | 52    | 37    | 262   | 1296  | 61    | 36    | 49    | 29    | 26       | Atp2a2  |
| Atp2a3   | 21533 | 21343 | 24257 | 26415 | 30089 | 26180  | 29059 | 25563 | 23850 | 28010 | 28334 | 27908 | 26584 | 27636 | 21605 | 20049 | 26438 | 28196 | 28035 | 23009 | 30068 | 30350 | 24013 | 28606 | 28779 | 23412 | 26877 | 28769    | Atp2a3  |
| Atp2a4   | 156   | 197   | 308   | 178   | 226   | 143    | 164   | 95    | 129   | 175   | 177   | 101   | 247   | 97    | 182   | 283   | 192   | 208   | 161   | 96    | 169   | 157   | 191   | 110   | 119   | 155   | 167   | 103      | Atp2a4  |
| Atp2b1   | 14056 | 12065 | 11314 | 13232 | 16540 | 16115  | 16394 | 14824 | 13830 | 13323 | 15327 | 10690 | 13126 | 11636 | 15116 | 13434 | 12512 | 14296 | 14159 | 15918 | 16370 | 14290 | 13889 | 10418 | 13600 | 7603  | 11381 | 10833    | Atp2b1  |
| Atp2b2   | 894   | 1167  | 956   | 1703  | 3116  | 2181   | 2276  | 1969  | 2469  | 2835  | 2413  | 1951  | 1929  | 1869  | 1246  | 1111  | 1517  | 2167  | 2239  | 1852  | 2254  | 3116  | 1982  | 2116  | 3260  | 1165  | 1413  | 1508     | Atp2b2  |
| Atp2b3   | 108   | 194   | 108   | 278   | 718   | 451    | 329   | 652   | 920   | 742   | 817   | 360   | 533   | 366   | 183   | 189   | 147   | 316   | 481   | 438   | 532   | 1076  | 904   | 446   | 910   | 144   | 273   | 218      | Atp2b3  |
| Atp2b4   | 11479 | 11041 | 8885  | 9748  | 10698 | 10488  | 9246  | 6637  | 7697  | 7707  | 8442  | 6040  | 6754  | 5983  | 11176 | 13105 | 9587  | 10879 | 8462  | 8285  | 9643  | 7969  | 7749  | 6155  | 6866  | 4260  | 5736  | 5782     | Atp2b4  |
| Atp2c1   | 11118 | 9891  | 9643  | 11460 | 12905 | 11779  | 13047 | 11894 | 9866  | 9452  | 9754  | 9042  | 9036  | 9433  | 12150 | 10063 | 10326 | 11637 | 11672 | 12781 | 12804 | 11498 | 9849  | 9207  | 10030 | 8133  | 9164  | 8984     | Atp2c1  |
| Atp2c2   | 100   | 74    | 83    | 6     | 7     | 58     | 3     | 55    | 96    | 49    | 40    | 62    | 92    | 73    | 80    | 118   | 21    | 73    | 12    | 3     | 4     | 12    | 136   | 61    | 14    | 19    | 56    | 69       | Atp2c2  |
| Atp4a    | 234   | 229   | 273   | 224   | 241   | 188    | 213   | 71    | 60    | 49    | 48    | 48    | 65    | 65    | 167   | 187   | 228   | 204   | 200   | 195   | 162   | 48    | 47    | 60    | 47    | 80    | 53    | Atp4a    |         |
| Atp5a1   | 2476  | 1692  | 1335  | 1438  | 1121  | 1532   | 962   | 2161  | 1418  | 1205  | 1344  | 1479  | 1489  | 1070  | 2412  | 1832  | 1966  | 1716  | 1416  | 1493  | 1626  | 1828  | 1486  | 1333  | 1981  | 1387  | 1326  | 1226     | Atp5a1  |
| Atp5b    | 72391 | 72958 | 65096 | 63884 | 56231 | 58574  | 60728 | 67402 | 63809 | 59043 | 56772 | 65794 | 60617 | 65868 | 71596 | 62678 | 65077 | 60841 | 65607 | 62191 | 64589 | 59486 | 63966 | 63502 | 62393 | 74417 | 67877 | 70324    | Atp5b   |
| Atp5c1   | 12340 | 12030 | 10494 | 11233 | 11169 | 11138  | 12692 | 12986 | 12049 | 11267 | 10663 | 11879 | 11533 | 11947 | 12675 | 11660 | 10653 | 10780 | 11908 | 13758 | 12419 | 9638  | 12787 | 11443 | 11350 | 12839 | 12261 | 12931    | Atp5c1  |
| Atp5d    | 5128  | 6962  | 5757  | 5998  | 5128  | 5108   | 5299  | 4009  | 4641  | 4810  | 4681  | 4742  | 4603  | 4702  | 4776  | 5118  | 6236  | 5695  | 5727  | 5156  | 5465  | 3907  | 4687  | 5075  | 4800  | 5666  | 4767  | 4975     | Atp5d   |
| Atp5e    | 4083  | 5274  | 4516  | 5088  | 4693  | 3304   | 6762  | 4821  | 4427  | 6057  | 5972  | 5452  | 5147  | 8436  | 3789  | 2973  | 5254  | 4215  | 4327  | 4390  | 6520  | 3832  | 4634  | 6952  | 5626  | 5929  | 5467  | 8572     | Atp5e   |
| Atp5g1   | 3835  | 4506  | 3940  | 4311  | 3720  | 3601   | 3986  | 3075  | 3369  | 3078  | 3434  | 3180  | 3433  | 3351  | 3662  | 3961  | 3819  | 4035  | 3930  | 4142  | 3933  | 2981  | 3536  | 3277  | 3207  | 3704  | 3366  | 3571     | Atp5g1  |
| Atp5g2   | 4674  | 6417  | 5163  | 4541  | 4130  | 4472   | 4957  | 5034  | 5927  | 4673  | 5336  | 5837  | 6317  | 7354  | 4603  | 4026  | 4908  | 4078  | 4979  | 5783  | 4944  | 4204  | 5705  | 6141  | 5568  | 7171  | 6846  | 7380     | Atp5g2  |
| Atp5g3   | 12003 | 11593 | 13605 | 12285 | 11440 | 9635   | 11360 | 10534 | 9203  | 11131 | 10473 | 11288 | 10566 | 11143 | 11248 | 10129 | 13166 | 11316 | 12157 | 11241 | 11237 | 9424  | 9756  | 11674 | 10482 | 12711 | 11545 | 12290    | Atp5g3  |
| Atp5h    | 10299 | 11657 | 11920 | 11139 | 9720  | 9265   | 11589 | 9638  | 8883  | 9258  | 8964  | 9512  | 9512  | 12270 | 10900 | 9285  | 11425 | 10160 | 10615 | 12082 | 11751 | 7618  | 9041  | 9883  | 9265  | 11055 | 10494 | 12463    | Atp5h   |
| Atp5j    | 8030  | 6854  | 9685  | 8483  | 7515  | 6830   | 7107  | 8287  | 8600  | 7940  | 7895  | 8748  | 7869  | 10987 | 8024  | 5992  | 9048  | 7557  | 7719  | 9091  | 9260  | 6929  | 6644  | 9289  | 8696  | 10048 | 8835  | 10684    | Atp5j   |
| Atp5k    | 7209  | 8468  | 8893  | 9051  | 7082  | 6003   | 10153 | 8372  | 8362  | 9287  | 9589  | 8582  | 8899  | 12025 | 7348  | 5861  | 8846  | 7491  | 7922  | 8845  | 9224  | 5955  | 8390  | 9927  | 9437  | 9933  | 8971  | 12506    | Atp5k   |
| Atp5l    | 2170  | 2663  | 2041  | 2665  | 2140  | 1485   | 4052  | 2302  | 1989  | 3089  | 2620  | 2399  | 2367  | 5998  | 1826  | 1159  | 2650  | 1949  | 1767  | 2244  | 4093  | 1726  | 1931  | 3795  | 2707  | 2795  | 2696  | 5436     | Atp5l   |
| Atp5m    | 6536  | 6880  | 7372  | 8498  | 7238  | 7247   | 9249  | 5561  | 6053  | 6780  | 7282  | 6672  | 6775  | 8737  | 6835  | 6551  | 7723  | 6899  | 8078  | 9613  | 8779  | 4926  | 6291  | 6861  | 7197  | 7047  | 7224  | 8039     | Atp5m   |
| Atp5md   | 7239  | 6389  | 6831  | 8268  | 6887  | 5249   | 11843 | 7679  | 5846  | 8026  | 7822  | 5987  | 6262  | 11884 | 7465  | 4317  | 7055  | 6676  | 6657  | 7582  | 11545 | 5793  | 6034  | 8554  | 7883  | 6958  | 6314  | 11066    | Atp5md  |
| Atp5mpl  | 4370  | 3808  | 4147  | 4444  | 3822  | 2573   | 6297  | 4737  | 3571  | 5166  | 4553  | 4213  | 3864  | 8324  | 4398  | 2593  | 4329  | 3506  | 3471  | 4154  | 5999  | 3407  | 3628  | 5346  | 4690  | 4574  | 3963  | 7433     | Atp5mpl |
| Atp5o    | 1067  | 1293  | 842   | 886   | 877   | 729    | 1159  | 1106  | 803   | 1237  | 857   | 967   | 872   | 1712  | 985   | 578   | 1204  | 795   | 761   | 1011  | 1356  | 937   | 874   | 1680  | 945   | 1040  | 1001  | 1616     | Atp5o   |
| Atp5pb   | 17946 | 16626 | 16472 | 15832 | 14777 | 14838  | 19525 | 19131 | 16174 | 14950 | 14083 | 16167 | 15442 | 18310 | 19937 | 16055 | 16026 | 15056 | 15359 | 18917 | 17648 | 15871 | 16243 | 16487 | 15386 | 17663 | 16490 | 19522    | Atp5pb  |
| Atp6a1   | 8729  | 9624  | 7718  | 9042  | 9836  | 8881   | 9341  | 9226  | 8894  | 8757  | 8282  | 7348  | 7851  | 7059  | 9525  | 8833  | 8577  | 9894  | 9321  | 9603  | 9341  | 10644 | 9207  | 7500  | 8636  | 7262  | 7434  | 7092     | Atp6a1  |
| Atp6a1l  | 72    | 68    | 14    | 66    | 131   | 71     | 97    | 71    | 67    | 65    | 48    | 37    | 56    | 22    | 124   | 111   | 50    | 128   | 69    | 79    | 92    | 65    | 61    | 27    | 58    | 30    | 9     | 17       | Atp6a1l |
| Atp6a2   | 8053  | 6855  | 7072  | 7525  | 8253  | 7589   | 8961  | 6575  | 5361  | 5132  | 5089  | 5310  | 5087  | 5403  | 9053  | 7675  | 7667  | 8156  | 7867  | 9179  | 8376  | 6323  | 5603  | 5252  | 5555  | 5205  | 5244  | 5459     | Atp6a2  |
| Atp6v0a1 | 6163  | 7165  | 6400  | 9608  | 12329 | 9606   | 9904  | 8206  | 8871  | 10356 | 10178 | 8750  | 8731  | 6883  | 7128  | 8241  | 10786 | 10505 | 8460  | 10652 | 11213 | 8532  | 9058  | 11165 | 6344  | 7835  | 7790  | Atp6v0a1 |         |
| Atp6v0a2 | 7632  | 8491  | 7097  | 7131  | 6330  | 6963</ |       |       |       |       |       |       |       |       |       |       |       |       |       |       |       |       |       |       |       |       |       |          |         |

|          |       |       |       |       |       |       |       |       |       |       |       |       |       |       |       |       |       |       |       |       |       |       |       |       |       |       |       |       |          |          |
|----------|-------|-------|-------|-------|-------|-------|-------|-------|-------|-------|-------|-------|-------|-------|-------|-------|-------|-------|-------|-------|-------|-------|-------|-------|-------|-------|-------|-------|----------|----------|
| Atpaf1   | 767   | 608   | 811   | 605   | 722   | 660   | 705   | 1080  | 1022  | 1011  | 1069  | 974   | 1140  | 981   | 803   | 750   | 694   | 622   | 683   | 652   | 684   | 1011  | 1128  | 1101  | 904   | 1280  | 1118  | 1089  | Atpaf1   |          |
| Atpaf2   | 1541  | 1589  | 1440  | 1556  | 1275  | 1363  | 1514  | 1296  | 1477  | 1332  | 1425  | 1501  | 1454  | 1494  | 1440  | 1654  | 1471  | 1506  | 1418  | 1415  | 1438  | 1308  | 1368  | 1431  | 1459  | 1743  | 1502  | 1457  | Atpaf2   |          |
| Atpaf1   | 5727  | 6692  | 6441  | 6646  | 6653  | 5993  | 7967  | 6949  | 7191  | 8008  | 7097  | 6938  | 6924  | 9486  | 5919  | 5063  | 6633  | 6345  | 6668  | 7993  | 8057  | 6433  | 7163  | 8643  | 7657  | 7738  | 7510  | 9121  | Atpaf1   |          |
| Atpscskt | 1027  | 1012  | 545   | 746   | 879   | 1029  | 830   | 1702  | 1590  | 1488  | 1600  | 1497  | 1503  | 1549  | 938   | 819   | 661   | 638   | 783   | 1065  | 972   | 1180  | 1507  | 1251  | 1761  | 868   | 1897  | 1388  | Atpscskt |          |
| Atr      | 10028 | 7276  | 4963  | 5801  | 5150  | 6976  | 7137  | 6879  | 6339  | 4408  | 5173  | 5435  | 5502  | 5778  | 9866  | 8482  | 4940  | 5398  | 5054  | 7887  | 6764  | 4137  | 6122  | 4054  | 4849  | 4007  | 6199  | 5446  | Atr      |          |
| Atraid   | 2712  | 2772  | 2387  | 2542  | 2372  | 2472  | 2744  | 2773  | 2562  | 2310  | 2480  | 2336  | 2304  | 2467  | 2933  | 2322  | 2464  | 2479  | 2455  | 2820  | 2683  | 2762  | 2668  | 2478  | 2435  | 2520  | 2375  | 2592  | Atraid   |          |
| Atrip    | 2339  | 2641  | 2232  | 2691  | 2653  | 2485  | 2486  | 2301  | 2160  | 2294  | 2037  | 2271  | 2258  | 2156  | 2229  | 2454  | 2370  | 2599  | 2442  | 2547  | 2515  | 2252  | 1948  | 2237  | 2411  | 1991  | 2308  | 2161  | Atrip    |          |
| Atrn     | 9844  | 9392  | 6282  | 8403  | 10033 | 10007 | 9505  | 8664  | 8497  | 7899  | 7880  | 7556  | 7460  | 7469  | 9936  | 9404  | 7044  | 8630  | 8503  | 9477  | 9798  | 8281  | 7882  | 6405  | 8306  | 4764  | 7216  | 6584  | Atrn     |          |
| Atrnl1   | 9870  | 8712  | 7968  | 9870  | 10964 | 10628 | 11173 | 8131  | 7968  | 8528  | 8906  | 7698  | 8377  | 7954  | 9955  | 9667  | 9251  | 10630 | 10243 | 9582  | 11481 | 9389  | 7963  | 7379  | 8501  | 5242  | 8062  | 7563  | Atrnl1   |          |
| Atrx     | 27726 | 18643 | 13408 | 18713 | 22418 | 27626 | 27765 | 51321 | 44406 | 33897 | 36596 | 37263 | 36807 | 41311 | 27960 | 23977 | 14865 | 18368 | 20715 | 30479 | 27708 | 31900 | 41520 | 28239 | 5703  | 22086 | 41154 | 33484 | Atrx     |          |
| Atxn1    | 1330  | 1165  | 1754  | 1738  | 2140  | 2015  | 2292  | 1535  | 1562  | 2054  | 1925  | 1692  | 1349  | 1682  | 1342  | 1138  | 1776  | 1951  | 2172  | 1437  | 2096  | 2354  | 1515  | 1897  | 2082  | 1414  | 1435  | 1467  | Atxn1    |          |
| Atxn10   | 21224 | 21376 | 17491 | 17923 | 19014 | 18145 | 20770 | 22167 | 20034 | 20181 | 17283 | 20191 | 18872 | 20411 | 22618 | 17397 | 18310 | 18308 | 19739 | 19415 | 21294 | 23064 | 19792 | 19242 | 20318 | 20596 | 19717 | 21687 | Atxn10   |          |
| Atxn11   | 5515  | 5459  | 5394  | 5101  | 4490  | 4917  | 4679  | 4295  | 4517  | 4384  | 5114  | 5002  | 4911  | 4908  | 4863  | 5345  | 5116  | 4932  | 4602  | 4175  | 4971  | 4134  | 4399  | 4668  | 4262  | 4083  | 4747  | 4938  | Atxn11   |          |
| Atxn2    | 5982  | 6137  | 6862  | 7634  | 8069  | 7566  | 7171  | 6763  | 7054  | 8018  | 8024  | 8114  | 7635  | 7853  | 5544  | 6068  | 7158  | 7718  | 7697  | 6046  | 7638  | 8245  | 6470  | 7798  | 8458  | 6949  | 7191  | 7316  | Atxn2    |          |
| Atxn21   | 9183  | 11749 | 14364 | 15070 | 15194 | 12697 | 12956 | 12383 | 14225 | 17767 | 15882 | 18678 | 15305 | 17617 | 9028  | 10210 | 15807 | 14345 | 15665 | 10724 | 13989 | 18735 | 12863 | 19503 | 18097 | 20524 | 15894 | 16887 | Atxn21   |          |
| Atxn3    | 4119  | 3568  | 4238  | 4321  | 3831  | 4386  | 4376  | 3631  | 2857  | 3166  | 3007  | 3593  | 3543  | 3838  | 4233  | 3875  | 3957  | 4275  | 3783  | 4188  | 4364  | 3350  | 2790  | 3037  | 3427  | 2910  | 3607  | 3677  | Atxn3    |          |
| Atxn7    | 1688  | 1552  | 1693  | 1950  | 1935  | 2215  | 2305  | 2997  | 2956  | 3095  | 3302  | 4034  | 3699  | 4003  | 1543  | 1577  | 1655  | 1837  | 2084  | 2035  | 2098  | 2966  | 2933  | 3392  | 3735  | 2995  | 3946  | 3757  | Atxn7    |          |
| Atxn71   | 1129  | 1253  | 930   | 1145  | 1567  | 1383  | 1284  | 1536  | 1566  | 1527  | 1432  | 1389  | 1463  | 1288  | 1197  | 1194  | 1090  | 1224  | 1369  | 1367  | 1325  | 1551  | 1422  | 1277  | 1592  | 1091  | 1330  | 1250  | Atxn71   |          |
| Atxn72   | 698   | 917   | 1007  | 1069  | 1450  | 1207  | 1241  | 2249  | 2802  | 3171  | 2995  | 3338  | 2913  | 3257  | 719   | 767   | 1169  | 1084  | 1354  | 1079  | 1223  | 3213  | 2429  | 3544  | 3410  | 3064  | 2919  | 3068  | Atxn72   |          |
| Atxn73   | 8780  | 10613 | 10770 | 12426 | 13331 | 12057 | 11567 | 11048 | 11977 | 13151 | 12112 | 12912 | 11936 | 11974 | 8761  | 8816  | 12302 | 12171 | 13695 | 11167 | 12343 | 13257 | 11408 | 12921 | 13305 | 12347 | 12183 | 11941 | Atxn73   |          |
| Atxn73b  | 33410 | 28170 | 35636 | 36935 | 38454 | 36630 | 39191 | 39886 | 35398 | 39873 | 38714 | 41586 | 40335 | 44365 | 34598 | 29116 | 37066 | 36542 | 38899 | 33510 | 39523 | 45609 | 35529 | 41607 | 42188 | 41695 | 41032 | 44699 | Atxn73b  |          |
| AU015836 | 14    | 14    | 16    | 4     | 0     | 8     | 0     | 9     | 18    | 3     | 5     | 10    | 19    | 15    | 33    | 17    | 15    | 1     | 3     | 0     | 1     | 10    | 12    | 9     | 7     | 12    | 16    | 14    | AU015836 |          |
| AU018091 | 0     | 0     | 0     | 0     | 0     | 0     | 0     | 5     | 1     | 0     | 6     | 7     | 1     | 0     | 0     | 0     | 0     | 0     | 0     | 0     | 0     | 0     | 1     | 0     | 0     | 1     | 0     | 1     | 1        | AU018091 |
| AU021092 | 153   | 177   | 106   | 161   | 217   | 218   | 184   | 253   | 354   | 268   | 235   | 290   | 244   | 270   | 158   | 100   | 153   | 195   | 241   | 211   | 193   | 237   | 357   | 266   | 299   | 280   | 285   | 202   | AU021092 |          |
| AU022252 | 11086 | 11970 | 9426  | 11796 | 9452  | 10407 | 9731  | 5454  | 4823  | 5251  | 5329  | 6083  | 6042  | 5815  | 11044 | 10982 | 10515 | 11055 | 10211 | 9373  | 10158 | 5238  | 4692  | 5260  | 5958  | 4655  | 6422  | 6076  | AU022252 |          |
| AU040320 | 2896  | 3448  | 3772  | 4052  | 3979  | 3727  | 3518  | 3121  | 3438  | 4215  | 3994  | 4191  | 3903  | 3687  | 2926  | 3203  | 3793  | 3744  | 4074  | 3260  | 3651  | 4311  | 3617  | 4028  | 4166  | 3928  | 3550  | 3542  | AU040320 |          |
| AU041133 | 467   | 325   | 311   | 236   | 279   | 414   | 313   | 788   | 831   | 592   | 499   | 558   | 627   | 582   | 452   | 395   | 787   | 242   | 346   | 530   | 375   | 620   | 819   | 471   | 523   | 570   | 595   | 547   | AU041133 |          |
| Auh      | 1090  | 1220  | 1083  | 1228  | 1422  | 1319  | 1329  | 1490  | 1518  | 1512  | 1472  | 1552  | 1653  | 1697  | 1143  | 1224  | 1214  | 1285  | 1422  | 1307  | 1349  | 1494  | 1594  | 1599  | 1693  | 1514  | 1684  | 1665  | Auh      |          |
| Aunip    | 603   | 628   | 747   | 478   | 318   | 442   | 419   | 442   | 392   | 373   | 384   | 604   | 515   | 622   | 496   | 557   | 567   | 410   | 435   | 583   | 513   | 417   | 231   | 368   | 440   | 399   | 824   | 682   | 608      | Aunip    |
| Aup1     | 2748  | 3346  | 3314  | 3177  | 2752  | 2697  | 2892  | 2965  | 3043  | 3018  | 3103  | 3186  | 2963  | 3227  | 2683  | 3131  | 3227  | 3101  | 3113  | 2619  | 2786  | 3365  | 3053  | 3398  | 3316  | 3399  | 3049  | 3065  | Aup1     |          |
| Aurka    | 3194  | 3647  | 3914  | 2690  | 1972  | 2269  | 2425  | 2858  | 3171  | 2865  | 2566  | 4056  | 3622  | 3780  | 2557  | 3072  | 2938  | 2212  | 2780  | 2719  | 2314  | 1861  | 2782  | 3274  | 2780  | 5277  | 4541  | 4208  | Aurka    |          |
| Aurkaip1 | 2476  | 2859  | 2443  | 2417  | 2088  | 2012  | 2232  | 2185  | 2310  | 2030  | 2074  | 2192  | 2131  | 2594  | 2502  | 2348  | 2537  | 2082  | 2355  | 2561  | 2334  | 1761  | 2335  | 2303  | 2245  | 2727  | 2298  | 2552  | Aurkaip1 |          |
| Aurkb    | 4327  | 4505  | 5390  | 4112  | 2955  | 3198  | 3696  | 2848  | 3441  | 3374  | 2955  | 5370  | 4425  | 5201  | 3477  | 4111  | 4990  | 3562  | 4072  | 3202  | 3344  | 2430  | 2913  | 4371  | 3774  | 6809  | 4811  | 5381  | Aurkb    |          |
| Aurkc    | 0     | 2     | 4     | 4     | 6     | 1     | 2     | 4     | 2     | 0     | 4     | 0     | 3     | 3     | 5     | 2     | 1     | 0     | 5     | 2     | 4     | 2     | 3     | 2     | 1     | 0     | 1     | 0     | 1        | Aurkc    |
| Auts2    | 373   | 1391  | 863   | 1700  | 1498  | 748   | 896   | 835   | 1041  | 1795  | 1436  | 1727  | 1233  | 1258  | 974   | 560   | 1144  | 824   | 776   | 1694  | 1225  | 1480  | 1072  | 1075  | 2743  | 1262  | 1710  | 914   | Auts2    |          |
| AV320801 | 0     | 0     | 0     | 0     | 0     | 0     | 0     | 0     | 0     | 0     | 0     | 1     | 0     | 0     | 0     | 0     | 0     | 0     | 0     | 0     | 0     | 0     | 3     | 0     | 0     | 0     | 0     | 0     | 0        | AV320801 |
| Aven     | 264   | 203   | 255   | 180   | 171   | 155   | 171   | 688   | 613   | 600   | 708   | 760   | 689   | 744   | 255   | 238   | 236   | 145   | 168   | 189   | 155   | 673   | 579   | 691   | 539   | 850   | 618   | 768   | Aven     |          |
| Avil     | 273   | 452   | 325   | 404   | 893   | 307   | 226   | 458   | 701   | 391   | 723   | 159   | 485   | 161   | 394   | 498   | 387   | 748   | 428   | 302   | 305   | 896   | 415   | 149   | 533   | 95    | 193   | 239   | Avil     |          |
| Avi9     | 9397  | 8302  | 6530  | 8755  | 10452 | 10501 | 11622 | 12331 | 9768  | 9880  | 8804  | 9820  | 9285  | 10194 | 10098 | 8292  | 7697  | 9016  | 9693  | 11027 | 11434 | 10921 | 9405  | 8887  | 10921 | 6687  | 9975  | 9437  | Avi9     |          |
| Avp1     | 1     | 0     | 5     | 1     | 0     | 2     | 1     | 0     | 2     | 1     | 0     | 0     | 3     | 0     | 0     | 0     | 0     | 1     | 0     | 2     | 1     | 2     | 0     | 0     | 0     | 0     | 0     | 0     | 0        | Avp1     |
| Avp1a    | 541   | 550   | 478   | 450   | 274   | 405   | 273   | 161   | 275   | 201   | 238   | 194   | 209   | 175   | 460   | 452   | 426   | 404   | 369   | 400   | 284   | 147   | 287   | 236   | 165   | 316   | 199   | 211   | Avp1a    |          |
| Avpr1a   | 141   | 24    | 35    | 27    | 23    | 16    | 28    | 216   | 170   | 116   | 74    | 33    | 24    | 29    | 22    | 24    | 16    | 32    | 19    | 33    | 27    | 85    | 260   | 94    | 50    | 52    | 24    | 24    | Avpr1a   |          |
| Avpr1b   | 0     | 0     | 0     | 0     | 0     | 3     | 1     | 0     | 1     | 0     | 0     | 0     | 2     | 0     | 1     | 3     | 0     | 0     | 2     | 0     | 1     | 0     | 1     | 5     | 0     | 0     | 1     | 0     | 0        | Avpr1b   |
| Avpr2    | 1     | 0     | 0     | 0     | 2     | 0     | 1     | 0     | 0     | 0     | 0     | 2     | 0     | 1     | 0     | 0     | 0     | 0     | 0     | 0     | 0     | 3     | 0     | 0     | 1     | 0     | 0     | 0     | 0        | Avpr2    |
| AW146154 | 622   | 474   | 754   | 576   | 451   | 563   | 517   | 526   | 442   | 490   | 510   | 628   | 589   | 506   | 605   | 700   | 648   | 560   | 555   | 485   | 466   | 560   | 557   | 488   | 426   | 600   | 522   | 605   | AW146154 |          |
| AW209491 | 1051  | 1003  | 1111  | 996   | 1014  | 1035  | 1009  | 1557  | 1361  | 1134  | 1244  | 1229  | 1280  | 1270  | 1146  | 976   | 1137  | 905   | 1026  | 1268  | 1075  | 1364  | 1408  | 1228  | 1275  | 1365  | 1334  | 1285  | AW209491 |          |
| AW549877 | 12017 | 9508  | 9412  | 9373  | 10369 | 10904 | 11616 | 15107 | 12612 | 10726 | 11572 | 12843 | 12938 | 13193 | 12552 | 10160 | 9822  | 9683  | 9825  | 11925 | 11004 | 12724 | 12376 | 11087 | 11722 | 10222 | 13536 | 13027 | AW549877 |          |
| AW551984 | 6342  | 5944  | 4590  | 4591  | 6114  | 6202  | 5822  | 7486  |       |       |       |       |       |       |       |       |       |       |       |       |       |       |       |       |       |       |       |       |          |          |

|                |       |       |       |       |       |       |       |       |       |       |       |       |       |       |       |       |       |       |       |       |       |       |       |       |       |       |       |       |                |
|----------------|-------|-------|-------|-------|-------|-------|-------|-------|-------|-------|-------|-------|-------|-------|-------|-------|-------|-------|-------|-------|-------|-------|-------|-------|-------|-------|-------|-------|----------------|
| B3gnt4         | 118   | 124   | 116   | 121   | 124   | 149   | 121   | 82    | 79    | 114   | 72    | 100   | 82    | 80    | 90    | 146   | 124   | 131   | 142   | 140   | 106   | 82    | 85    | 111   | 94    | 123   | 121   | 81    | B3gnt4         |
| B3gnt5         | 6649  | 4749  | 5457  | 4823  | 5424  | 5412  | 5955  | 8961  | 7510  | 6766  | 6292  | 8043  | 7489  | 8171  | 7116  | 5687  | 5241  | 4767  | 5116  | 6360  | 5384  | 7384  | 6772  | 6917  | 7388  | 7590  | 8358  | 8562  | B3gnt5         |
| B3gnt6         | 12    | 13    | 16    | 16    | 25    | 8     | 15    | 1     | 6     | 8     | 5     | 5     | 3     | 4     | 12    | 11    | 25    | 30    | 5     | 12    | 12    | 8     | 5     | 5     | 2     | 2     | 5     | 0     | B3gnt6         |
| B3gnt7         | 376   | 332   | 396   | 292   | 264   | 319   | 188   | 201   | 241   | 275   | 242   | 164   | 201   | 145   | 301   | 447   | 309   | 264   | 316   | 202   | 201   | 221   | 256   | 212   | 136   | 279   | 157   | 122   | B3gnt7         |
| B3gnt8         | 35    | 21    | 28    | 9     | 17    | 43    | 12    | 46    | 93    | 55    | 75    | 27    | 41    | 28    | 24    | 33    | 22    | 24    | 15    | 9     | 18    | 35    | 118   | 72    | 33    | 54    | 41    | 59    | B3gnt8         |
| B3gnt9         | 194   | 202   | 252   | 177   | 135   | 247   | 105   | 291   | 559   | 485   | 656   | 405   | 523   | 333   | 173   | 231   | 234   | 151   | 164   | 162   | 104   | 455   | 744   | 424   | 377   | 312   | 456   | 394   | B3gnt9         |
| B3gnt1         | 746   | 759   | 569   | 516   | 600   | 583   | 574   | 663   | 840   | 713   | 848   | 663   | 807   | 643   | 655   | 741   | 557   | 521   | 516   | 634   | 591   | 647   | 794   | 608   | 645   | 566   | 737   | 743   | B3gnt1         |
| B430305J03RIK  | 12    | 18    | 17    | 11    | 24    | 9     | 21    | 24    | 34    | 36    | 23    | 43    | 27    | 51    | 20    | 18    | 13    | 18    | 5     | 20    | 9     | 35    | 34    | 23    | 28    | 8     | 30    | 17    | B430305J03RIK  |
| B430306N03RIK  | 0     | 0     | 0     | 0     | 1     | 0     | 0     | 1     | 0     | 0     | 1     | 0     | 3     | 0     | 3     | 0     | 0     | 0     | 0     | 0     | 0     | 0     | 1     | 0     | 3     | 0     | 0     | 0     | B430306N03RIK  |
| B4galnt1       | 804   | 930   | 961   | 1289  | 1919  | 1489  | 1372  | 1436  | 1645  | 2058  | 1683  | 1346  | 1326  | 1344  | 822   | 854   | 1399  | 1402  | 1905  | 1473  | 1516  | 2281  | 1568  | 1753  | 2330  | 1060  | 1027  | 1105  | B4galnt1       |
| B4galnt2       | 3     | 4     | 1     | 0     | 0     | 0     | 1     | 1     | 5     | 0     | 0     | 1     | 1     | 1     | 1     | 2     | 2     | 1     | 1     | 0     | 3     | 3     | 2     | 4     | 0     | 0     | 0     | 1     | B4galnt2       |
| B4galnt3       | 219   | 149   | 115   | 116   | 116   | 117   | 72    | 193   | 205   | 297   | 308   | 68    | 142   | 74    | 127   | 193   | 95    | 132   | 63    | 73    | 60    | 79    | 200   | 279   | 88    | 173   | 44    | 55    | B4galnt3       |
| B4galnt4       | 2846  | 3620  | 3499  | 3713  | 4232  | 3677  | 3384  | 5010  | 5656  | 6085  | 5143  | 6113  | 5687  | 5660  | 2740  | 3203  | 3853  | 3688  | 4277  | 3420  | 3503  | 6025  | 5016  | 6001  | 6354  | 5982  | 5635  | 5466  | B4galnt4       |
| B4galnt1       | 3864  | 3170  | 3474  | 3023  | 2300  | 2911  | 2359  | 2277  | 2709  | 2434  | 3578  | 2488  | 3041  | 2349  | 3307  | 4077  | 2881  | 3273  | 2290  | 2187  | 2218  | 2445  | 3093  | 2549  | 2139  | 2954  | 2508  | 2301  | B4galnt1       |
| B4galnt2       | 2645  | 3208  | 3140  | 3350  | 3856  | 3705  | 3175  | 4306  | 5221  | 5429  | 5350  | 5225  | 5038  | 4791  | 2698  | 2842  | 3409  | 3367  | 3878  | 3089  | 3347  | 5127  | 4718  | 5291  | 5744  | 5075  | 4968  | 4678  | B4galnt2       |
| B4galnt3       | 3212  | 4156  | 3704  | 4102  | 3697  | 3420  | 3795  | 2699  | 3306  | 3494  | 3503  | 3505  | 3127  | 3193  | 3218  | 3785  | 3987  | 3949  | 4058  | 3439  | 3772  | 3547  | 3170  | 3553  | 3630  | 3496  | 3213  | 3143  | B4galnt3       |
| B4galnt4       | 1531  | 1607  | 1679  | 1281  | 1346  | 1443  | 1259  | 1504  | 1533  | 1492  | 1555  | 1418  | 1699  | 1475  | 1642  | 1850  | 1386  | 1290  | 1340  | 1311  | 1283  | 1569  | 1682  | 1444  | 1351  | 1659  | 1464  | 1689  | B4galnt4       |
| B4galnt5       | 3688  | 4341  | 5207  | 5257  | 4609  | 4503  | 4137  | 2182  | 2684  | 2929  | 3305  | 3191  | 3061  | 2902  | 3575  | 4365  | 4934  | 5208  | 4947  | 3615  | 4218  | 3136  | 2539  | 3175  | 3243  | 3347  | 2957  | 3021  | B4galnt5       |
| B4galnt6       | 4475  | 4117  | 5376  | 5859  | 6752  | 5948  | 5882  | 3789  | 3639  | 4332  | 4477  | 4182  | 4393  | 4077  | 4771  | 4995  | 5696  | 5904  | 5901  | 4874  | 6010  | 5013  | 3852  | 3791  | 4414  | 3486  | 3807  | 4030  | B4galnt6       |
| B4galnt7       | 1926  | 2277  | 2471  | 2464  | 2371  | 2276  | 2171  | 1602  | 1888  | 1785  | 2028  | 1868  | 1867  | 1940  | 1991  | 2273  | 2516  | 2313  | 2328  | 2114  | 2157  | 1977  | 1794  | 1974  | 2043  | 1981  | 1789  | 1876  | B4galnt7       |
| B4galnt1       | 9     | 11    | 6     | 8     | 0     | 8     | 7     | 4     | 2     | 8     | 1     | 8     | 6     | 6     | 11    | 2     | 2     | 4     | 2     | 0     | 18    | 3     | 3     | 9     | 6     | 5     | 8     | 5     | B4galnt1       |
| B630019K06RIK  | 882   | 814   | 1177  | 1596  | 2248  | 1780  | 1856  | 1914  | 1619  | 2208  | 1958  | 1686  | 1572  | 1632  | 1017  | 801   | 1234  | 1613  | 1849  | 1508  | 1860  | 2784  | 1641  | 1957  | 2333  | 1502  | 1410  | 1530  | B630019K06RIK  |
| B830017H08RIK  | 8     | 3     | 7     | 6     | 20    | 9     | 7     | 28    | 51    | 63    | 46    | 17    | 35    | 19    | 4     | 7     | 3     | 2     | 13    | 4     | 5     | 47    | 44    | 25    | 56    | 14    | 12    | 12    | B830017H08RIK  |
| B9300094E09RIK | 1     | 2     | 1     | 0     | 2     | 3     | 8     | 6     | 7     | 7     | 0     | 8     | 9     | 11    | 0     | 5     | 3     | 0     | 2     | 3     | 3     | 8     | 12    | 10    | 5     | 12    | 19    | 15    | B9300094E09RIK |
| B9d1           | 678   | 752   | 558   | 569   | 603   | 590   | 575   | 1036  | 997   | 787   | 834   | 958   | 889   | 932   | 654   | 719   | 545   | 521   | 596   | 798   | 577   | 735   | 1075  | 869   | 935   | 1018  | 1082  | 929   | B9d1           |
| B9d2           | 328   | 514   | 381   | 495   | 457   | 409   | 420   | 670   | 684   | 750   | 676   | 751   | 746   | 706   | 367   | 405   | 526   | 474   | 561   | 557   | 443   | 653   | 726   | 786   | 758   | 840   | 782   | 765   | B9d2           |
| Baalc          | 3     | 4     | 2     | 4     | 3     | 10    | 1     | 12    | 16    | 7     | 19    | 3     | 7     | 5     | 9     | 5     | 3     | 4     | 2     | 6     | 4     | 17    | 14    | 7     | 8     | 8     | 5     | 11    | Baalc          |
| Baat           | 59    | 60    | 46    | 69    | 32    | 63    | 34    | 31    | 12    | 14    | 0     | 31    | 16    | 30    | 55    | 52    | 54    | 56    | 28    | 31    | 41    | 13    | 17    | 20    | 28    | 34    | 31    | 26    | Baat           |
| Babam1         | 3309  | 3952  | 3520  | 3399  | 3101  | 3286  | 3123  | 3098  | 3518  | 3516  | 3320  | 3721  | 3506  | 3655  | 2989  | 3252  | 3500  | 3232  | 3608  | 3222  | 3467  | 2882  | 3389  | 3704  | 3522  | 4302  | 3850  | 3751  | Babam1         |
| Babam2         | 1179  | 1313  | 1108  | 966   | 1038  | 1146  | 1106  | 1362  | 1285  | 1108  | 1028  | 1300  | 1171  | 1189  | 1218  | 1093  | 1116  | 925   | 1053  | 1171  | 1104  | 1305  | 1229  | 1188  | 1251  | 1396  | 1287  | 1283  | Babam2         |
| Bace1          | 8382  | 9051  | 7518  | 8347  | 7800  | 8022  | 7704  | 4531  | 4631  | 4712  | 5161  | 3872  | 4088  | 3975  | 8631  | 9263  | 8017  | 9248  | 7341  | 7000  | 7983  | 5370  | 4706  | 4381  | 4679  | 3643  | 3805  | 3730  | Bace1          |
| Bace2          | 281   | 230   | 211   | 241   | 263   | 232   | 175   | 167   | 212   | 150   | 279   | 110   | 192   | 122   | 251   | 241   | 211   | 233   | 192   | 209   | 164   | 157   | 296   | 101   | 129   | 93    | 96    | 129   | Bace2          |
| Bach1          | 8767  | 8084  | 8428  | 8128  | 7996  | 8633  | 8537  | 8994  | 8374  | 7887  | 8400  | 9049  | 9443  | 9983  | 8980  | 8506  | 8983  | 7964  | 7956  | 8555  | 8518  | 8621  | 7706  | 8317  | 9152  | 7699  | 9401  | 10159 | Bach1          |
| Bach2          | 2713  | 2494  | 3259  | 5135  | 5774  | 4856  | 5626  | 4125  | 4582  | 6233  | 5415  | 5840  | 5601  | 5739  | 2888  | 2941  | 4516  | 5086  | 5656  | 4018  | 5605  | 5987  | 4311  | 6178  | 7430  | 5196  | 4814  | 5287  | Bach2          |
| Bad            | 1603  | 2328  | 1837  | 1981  | 1771  | 1741  | 1654  | 1430  | 1617  | 1551  | 1598  | 1440  | 1345  | 1537  | 1567  | 1794  | 1905  | 1960  | 2069  | 1877  | 1845  | 1399  | 1681  | 1526  | 1573  | 1596  | 1388  | 1489  | Bad            |
| Bag1           | 8815  | 8124  | 8494  | 8055  | 7473  | 6723  | 8896  | 6945  | 6185  | 6620  | 6280  | 6414  | 6262  | 7735  | 8594  | 7430  | 8423  | 8166  | 7684  | 7479  | 8887  | 6475  | 6530  | 7063  | 6504  | 7124  | 6503  | 7516  | Bag1           |
| Bag2           | 850   | 833   | 871   | 803   | 838   | 769   | 820   | 686   | 739   | 809   | 865   | 810   | 772   | 758   | 798   | 957   | 889   | 799   | 921   | 703   | 701   | 592   | 819   | 756   | 706   | 958   | 748   | 833   | Bag2           |
| Bag3           | 1006  | 1168  | 1315  | 913   | 808   | 831   | 496   | 459   | 685   | 714   | 973   | 663   | 629   | 475   | 885   | 1290  | 1168  | 1002  | 780   | 556   | 544   | 585   | 918   | 650   | 572   | 754   | 655   | 521   | Bag3           |
| Bag4           | 5553  | 4763  | 4348  | 5324  | 5247  | 5570  | 5882  | 4098  | 3601  | 3412  | 3261  | 3934  | 3569  | 3761  | 5470  | 4600  | 4766  | 5151  | 5165  | 5759  | 5837  | 3659  | 3344  | 3546  | 3859  | 3710  | 3640  | 3806  | Bag4           |
| Bag5           | 2754  | 3149  | 3007  | 3254  | 2879  | 2919  | 3034  | 3171  | 2970  | 2874  | 2926  | 3178  | 2972  | 3216  | 2883  | 2845  | 3041  | 2996  | 2891  | 3186  | 2954  | 2896  | 2986  | 3079  | 3149  | 3606  | 3196  | 3345  | Bag5           |
| Bag6           | 14464 | 18134 | 22552 | 23439 | 22056 | 19499 | 18093 | 17059 | 20937 | 24624 | 22523 | 27432 | 21814 | 22923 | 14424 | 16173 | 23417 | 22237 | 24654 | 15622 | 19879 | 24465 | 19285 | 27651 | 26114 | 29111 | 21633 | 22840 | Bag6           |
| Bahcc1         | 6575  | 8867  | 10953 | 11109 | 9009  | 8800  | 7832  | 6533  | 7531  | 10639 | 9065  | 12820 | 9781  | 10570 | 6070  | 7728  | 10810 | 10258 | 9694  | 6498  | 8040  | 10833 | 6370  | 11535 | 11126 | 9104  | 10620 | 10170 | Bahcc1         |
| Bahd1          | 4832  | 6908  | 8665  | 8813  | 7688  | 6596  | 6777  | 2281  | 2540  | 3198  | 2794  | 3389  | 3005  | 3316  | 4767  | 5748  | 9170  | 8650  | 8505  | 5555  | 7511  | 3110  | 2552  | 3656  | 3548  | 3515  | 3159  | 3406  | Bahd1          |
| Baiap2         | 2535  | 3078  | 2881  | 3048  | 2694  | 2764  | 2741  | 895   | 1149  | 1065  | 991   | 957   | 891   | 912   | 2561  | 2924  | 2620  | 3177  | 2911  | 2976  | 2871  | 922   | 1136  | 1035  | 1017  | 920   | 807   | 882   | Baiap2         |
| Baiap211       | 938   | 752   | 840   | 659   | 384   | 435   | 377   | 160   | 197   | 159   | 274   | 124   | 153   | 93    | 738   | 1077  | 618   | 547   | 422   | 433   | 296   | 189   | 329   | 174   | 69    | 178   | 86    | 110   | Baiap211       |
| Baiap212       | 158   | 156   | 181   | 144   | 153   | 134   | 91    | 45    | 66    | 77    | 63    | 53    | 29    | 32    | 123   | 190   | 166   | 134   | 159   | 99    | 88    | 72    | 78    | 54    | 51    | 94    | 41    | 65    | Baiap212       |
| Baiap3         | 511   | 809   | 768   | 911   | 961   | 836   | 658   | 342   | 444   | 491   | 360   | 305   | 345   | 346   | 558   | 706   | 769   | 894   | 809   | 843   | 762   | 610   | 398   | 409   | 465   | 244   | 257   | 241   | Baiap3         |
| Bak1           | 1369  | 1519  | 1679  | 1046  | 1031  | 1140  | 864   | 1780  | 2298  | 2094  | 2118  | 2274  | 2434  | 2036  | 1321  | 1576  | 1306  | 965   | 1146  | 1106  | 932   | 1616  | 2508  | 2066  | 1891  | 2810  | 2423  | 2325  | Bak1           |
| Bambi          | 1010  | 822   | 714   | 555   | 449   | 513   | 443   | 927   | 775   | 590   | 623   | 484   | 625   | 447   | 779   | 913   | 487   | 512   | 410   | 542   | 406   | 607   | 863   | 600   | 409   | 705   | 547   | 551   | Bambi          |



|          |       |       |       |       |       |       |       |       |       |       |       |       |       |       |       |       |       |       |       |       |       |       |       |       |       |       |       |       |          |          |
|----------|-------|-------|-------|-------|-------|-------|-------|-------|-------|-------|-------|-------|-------|-------|-------|-------|-------|-------|-------|-------|-------|-------|-------|-------|-------|-------|-------|-------|----------|----------|
| Bbs7     | 2184  | 2031  | 2121  | 1914  | 1906  | 1981  | 2047  | 1871  | 1775  | 1734  | 1827  | 1962  | 1917  | 1993  | 2302  | 1946  | 2103  | 1772  | 1802  | 2340  | 2084  | 1644  | 1704  | 1758  | 1781  | 1891  | 1956  | 1923  | Bbs7     |          |
| Bbs9     | 2089  | 2179  | 1971  | 1828  | 1782  | 1618  | 1698  | 1754  | 1752  | 1546  | 1315  | 1535  | 1398  | 1480  | 2148  | 1927  | 2102  | 1699  | 1760  | 1930  | 1707  | 1534  | 1726  | 1547  | 1536  | 1653  | 1518  | 1423  | Bbs9     |          |
| Bbx      | 6757  | 5675  | 4706  | 5713  | 6332  | 6788  | 6265  | 4505  | 4253  | 3503  | 4435  | 3823  | 4107  | 3949  | 6915  | 5868  | 5341  | 5718  | 6081  | 7094  | 6509  | 3432  | 4203  | 3372  | 3709  | 2874  | 4023  | 3370  | Bbx      |          |
| BC003965 | 2679  | 2493  | 2347  | 2553  | 2176  | 2146  | 2443  | 2119  | 1953  | 1886  | 1847  | 2218  | 1905  | 2117  | 2454  | 2353  | 2327  | 2428  | 2302  | 2640  | 2336  | 1866  | 1884  | 2255  | 2035  | 2299  | 2200  | 2203  | BC003965 |          |
| BC004004 | 1885  | 2069  | 1666  | 1750  | 1873  | 2121  | 2015  | 2462  | 2485  | 2250  | 2251  | 2296  | 2311  | 2232  | 1967  | 1826  | 1751  | 1727  | 1843  | 2125  | 2182  | 2421  | 2650  | 2130  | 2318  | 2184  | 2332  | 2220  | BC004004 |          |
| BC005537 | 18239 | 16677 | 22677 | 25017 | 24399 | 22250 | 26691 | 19883 | 18712 | 22952 | 22569 | 23889 | 21463 | 24148 | 19183 | 17442 | 24591 | 26060 | 25011 | 19345 | 26059 | 25267 | 18430 | 24644 | 24947 | 24486 | 21065 | 23482 | BC005537 |          |
| BC005624 | 3275  | 3970  | 4092  | 3935  | 3267  | 3294  | 3593  | 3390  | 3343  | 3675  | 3417  | 3682  | 3730  | 3942  | 3291  | 3527  | 3845  | 3639  | 3444  | 3688  | 3550  | 3322  | 3353  | 3258  | 3786  | 3922  | 3704  | 3878  | BC005624 |          |
| BC016579 | 27    | 31    | 43    | 68    | 50    | 47    | 46    | 31    | 11    | 14    | 16    | 22    | 23    | 22    | 26    | 31    | 54    | 70    | 69    | 46    | 46    | 42    | 12    | 22    | 37    | 23    | 18    | 14    | 18       | BC016579 |
| BC024063 | 465   | 392   | 368   | 366   | 457   | 589   | 420   | 838   | 774   | 585   | 626   | 562   | 619   | 592   | 531   | 505   | 512   | 375   | 460   | 551   | 448   | 655   | 717   | 489   | 594   | 525   | 562   | 541   | BC024063 |          |
| BC024139 | 632   | 1267  | 1469  | 1033  | 1532  | 1155  | 802   | 1850  | 1769  | 1933  | 1792  | 2013  | 3433  | 1814  | 1250  | 1475  | 1578  | 991   | 1134  | 1329  | 977   | 2288  | 1761  | 1490  | 1983  | 922   | 2310  | 2015  | BC024139 |          |
| BC024978 | 299   | 309   | 447   | 438   | 465   | 433   | 456   | 772   | 826   | 1170  | 976   | 1038  | 1095  | 1213  | 274   | 247   | 399   | 375   | 544   | 396   | 438   | 1043  | 773   | 1106  | 1017  | 1053  | 1017  | 1161  | BC024978 |          |
| BC025920 | 520   | 463   | 508   | 420   | 419   | 565   | 534   | 872   | 823   | 743   | 676   | 939   | 743   | 898   | 568   | 411   | 557   | 372   | 550   | 573   | 504   | 667   | 782   | 865   | 917   | 907   | 931   | 885   | BC025920 |          |
| BC028528 | 146   | 109   | 191   | 140   | 158   | 147   | 159   | 244   | 233   | 301   | 419   | 215   | 290   | 228   | 171   | 158   | 110   | 157   | 139   | 160   | 166   | 307   | 342   | 279   | 251   | 292   | 201   | 256   | BC028528 |          |
| BC029722 | 504   | 562   | 501   | 545   | 571   | 597   | 565   | 635   | 689   | 793   | 806   | 688   | 724   | 763   | 566   | 557   | 586   | 576   | 564   | 533   | 640   | 757   | 747   | 744   | 759   | 667   | 652   | 757   | BC029722 |          |
| BC030500 | 134   | 148   | 141   | 180   | 219   | 190   | 200   | 176   | 233   | 240   | 267   | 163   | 138   | 155   | 161   | 129   | 218   | 183   | 192   | 193   | 191   | 261   | 219   | 174   | 215   | 118   | 105   | 157   | BC030500 |          |
| BC031181 | 5009  | 5107  | 5266  | 5710  | 5123  | 5162  | 5525  | 4892  | 4495  | 4728  | 4341  | 4782  | 4433  | 5014  | 5639  | 5139  | 5496  | 5108  | 5491  | 6165  | 5623  | 4674  | 4678  | 5048  | 5124  | 5049  | 5090  | 4951  | BC031181 |          |
| BC034090 | 270   | 274   | 386   | 318   | 380   | 373   | 261   | 856   | 1038  | 1090  | 1196  | 1111  | 1218  | 875   | 284   | 333   | 326   | 288   | 394   | 350   | 264   | 904   | 1120  | 985   | 947   | 766   | 1026  | 929   | BC034090 |          |
| BC035044 | 2     | 6     | 20    | 6     | 5     | 24    | 9     | 22    | 23    | 14    | 18    | 4     | 7     | 24    | 11    | 15    | 7     | 10    | 9     | 14    | 8     | 13    | 38    | 12    | 21    | 23    | 13    | 13    | BC035044 |          |
| BC035947 | 62    | 33    | 48    | 68    | 101   | 88    | 70    | 178   | 156   | 258   | 204   | 139   | 138   | 135   | 61    | 51    | 41    | 69    | 58    | 35    | 55    | 206   | 162   | 190   | 164   | 240   | 71    | 103   | BC035947 |          |
| BC048403 | 374   | 308   | 371   | 328   | 353   | 322   | 343   | 248   | 331   | 423   | 402   | 380   | 350   | 409   | 280   | 310   | 371   | 364   | 338   | 283   | 343   | 346   | 342   | 396   | 389   | 436   | 407   | 398   | BC048403 |          |
| BC048507 | 1     | 5     | 4     | 7     | 2     | 3     | 0     | 0     | 1     | 3     | 0     | 0     | 3     | 2     | 1     | 3     | 7     | 8     | 6     | 5     | 4     | 2     | 2     | 2     | 0     | 0     | 1     | 1     | BC048507 |          |
| BC048562 | 0     | 3     | 0     | 0     | 0     | 0     | 0     | 0     | 0     | 0     | 2     | 0     | 0     | 0     | 0     | 0     | 0     | 0     | 0     | 0     | 0     | 0     | 0     | 0     | 0     | 0     | 0     | 0     | BC048562 |          |
| BC048671 | 0     | 0     | 0     | 0     | 0     | 1     | 0     | 0     | 0     | 0     | 0     | 0     | 0     | 0     | 0     | 0     | 0     | 0     | 0     | 0     | 0     | 0     | 0     | 0     | 0     | 0     | 0     | 0     | BC048671 |          |
| BC048679 | 0     | 0     | 0     | 0     | 0     | 0     | 0     | 0     | 0     | 6     | 0     | 0     | 0     | 1     | 0     | 1     | 5     | 0     | 0     | 0     | 0     | 0     | 0     | 0     | 0     | 0     | 0     | 0     | BC048679 |          |
| BC049352 | 3     | 4     | 2     | 12    | 5     | 2     | 2     | 32    | 25    | 45    | 38    | 1     | 17    | 13    | 9     | 2     | 3     | 7     | 3     | 2     | 6     | 0     | 30    | 56    | 4     | 33    | 1     | 2     | BC049352 |          |
| BC049715 | 17    | 25    | 9     | 24    | 17    | 44    | 19    | 34    | 52    | 38    | 31    | 55    | 37    | 54    | 26    | 26    | 22    | 8     | 14    | 15    | 19    | 37    | 32    | 33    | 23    | 21    | 42    | 23    | BC049715 |          |
| BC049762 | 8     | 14    | 8     | 4     | 10    | 5     | 3     | 6     | 11    | 12    | 6     | 8     | 15    | 11    | 7     | 2     | 8     | 3     | 6     | 6     | 7     | 7     | 11    | 9     | 7     | 5     | 7     | 7     | BC049762 |          |
| BC051019 | 6     | 2     | 0     | 8     | 0     | 8     | 4     | 6     | 10    | 8     | 5     | 18    | 12    | 6     | 4     | 9     | 2     | 3     | 11    | 3     | 5     | 8     | 16    | 5     | 6     | 8     | 6     | 4     | BC051019 |          |
| BC051142 | 227   | 271   | 250   | 305   | 369   | 351   | 285   | 285   | 221   | 232   | 238   | 289   | 333   | 397   | 290   | 272   | 260   | 351   | 387   | 360   | 411   | 406   | 224   | 271   | 342   | 243   | 410   | 398   | BC051142 |          |
| BC055324 | 4478  | 3691  | 3056  | 2783  | 2019  | 2592  | 2894  | 2756  | 2446  | 1788  | 1936  | 2850  | 2456  | 2719  | 3914  | 3728  | 2817  | 2565  | 2551  | 3090  | 2748  | 1696  | 2145  | 2265  | 2080  | 3009  | 2764  | 2703  | BC055324 |          |
| BC061237 | 0     | 0     | 0     | 1     | 4     | 0     | 2     | 0     | 1     | 0     | 3     | 0     | 0     | 2     | 1     | 0     | 5     | 3     | 0     | 0     | 0     | 0     | 3     | 0     | 1     | 0     | 0     | 0     | BC061237 |          |
| BC107364 | 36    | 31    | 22    | 21    | 13    | 6     | 9     | 4     | 7     | 0     | 3     | 1     | 1     | 0     | 42    | 42    | 9     | 9     | 23    | 16    | 5     | 5     | 2     | 1     | 7     | 3     | 3     | 0     | BC107364 |          |
| BC147527 | 2     | 0     | 1     | 0     | 2     | 1     | 4     | 5     | 7     | 12    | 15    | 11    | 2     | 1     | 0     | 0     | 0     | 2     | 4     | 1     | 5     | 8     | 5     | 7     | 1     | 7     | 0     | 0     | BC147527 |          |
| Bcam     | 1658  | 1220  | 1180  | 573   | 626   | 725   | 403   | 1210  | 2092  | 1172  | 1583  | 818   | 1162  | 686   | 1042  | 1496  | 738   | 924   | 581   | 464   | 358   | 590   | 2450  | 1007  | 574   | 1012  | 798   | 871   | Bcam     |          |
| Bcan     | 300   | 387   | 480   | 759   | 1581  | 942   | 1120  | 481   | 828   | 953   | 850   | 270   | 134   | 362   | 307   | 382   | 561   | 950   | 1244  | 820   | 1238  | 1014  | 898   | 655   | 1108  | 256   | 179   | 141   | Bcan     |          |
| Bcap29   | 1316  | 897   | 1243  | 1159  | 1334  | 1394  | 1330  | 1625  | 1454  | 1349  | 1570  | 1370  | 1633  | 1520  | 1342  | 1252  | 1093  | 1159  | 1192  | 1564  | 1226  | 1337  | 1480  | 1369  | 1377  | 1726  | 1445  | 1637  | Bcap29   |          |
| Bcap31   | 5919  | 4773  | 5061  | 4448  | 3961  | 3881  | 4166  | 3665  | 3394  | 3165  | 3388  | 3150  | 3383  | 3434  | 5329  | 4815  | 4687  | 4266  | 4013  | 4531  | 3984  | 3412  | 3930  | 3369  | 2939  | 3827  | 3385  | 3704  | Bcap31   |          |
| Bcar1    | 4399  | 6088  | 5884  | 6818  | 6089  | 5268  | 4608  | 3488  | 4215  | 4623  | 4159  | 5142  | 4490  | 4296  | 4412  | 5555  | 6693  | 6568  | 6497  | 4603  | 5303  | 4645  | 3838  | 5027  | 4923  | 5051  | 4210  | 4206  | Bcar1    |          |
| Bcar3    | 532   | 487   | 831   | 484   | 579   | 458   | 445   | 565   | 577   | 459   | 531   | 615   | 632   | 640   | 506   | 586   | 605   | 359   | 482   | 436   | 458   | 588   | 606   | 527   | 524   | 703   | 791   | 705   | Bcar3    |          |
| Bcas1    | 135   | 136   | 215   | 172   | 297   | 252   | 162   | 310   | 310   | 487   | 473   | 222   | 411   | 219   | 181   | 177   | 225   | 295   | 235   | 223   | 256   | 548   | 433   | 276   | 330   | 135   | 404   | 297   | Bcas1    |          |
| Bcas2    | 5913  | 5048  | 6280  | 6058  | 5875  | 5454  | 6661  | 6736  | 6135  | 6520  | 6793  | 7780  | 6794  | 8310  | 5608  | 5404  | 6096  | 5892  | 6062  | 5653  | 6279  | 6649  | 6098  | 7844  | 7313  | 8329  | 7583  | 8413  | Bcas2    |          |
| Bcas3    | 1681  | 1773  | 1408  | 1500  | 1695  | 1682  | 1466  | 1694  | 1895  | 1842  | 1587  | 1651  | 1846  | 1549  | 1706  | 1835  | 1494  | 1557  | 1585  | 1591  | 1560  | 1900  | 1774  | 1640  | 1816  | 1564  | 1611  | 1508  | Bcas3    |          |
| Bcat1    | 4161  | 4472  | 4568  | 4156  | 5031  | 5127  | 4984  | 6364  | 5469  | 5845  | 5189  | 6789  | 6327  | 6857  | 4524  | 3699  | 5202  | 4131  | 5577  | 5350  | 5142  | 6493  | 5047  | 6271  | 6965  | 6387  | 7703  | 7276  | Bcat1    |          |
| Bcat2    | 1194  | 1202  | 1368  | 1179  | 1136  | 1054  | 917   | 1570  | 2192  | 1811  | 2105  | 1716  | 1931  | 1618  | 1073  | 1405  | 1212  | 1018  | 1113  | 878   | 862   | 1820  | 2073  | 1946  | 1850  | 2068  | 1923  | 1724  | Bcat2    |          |
| Bccp     | 4820  | 4324  | 5536  | 4708  | 3862  | 3926  | 4510  | 4099  | 3585  | 4437  | 4242  | 4622  | 4622  | 4956  | 4593  | 4310  | 4828  | 3979  | 4417  | 4591  | 4169  | 3417  | 3838  | 4732  | 4238  | 6015  | 4821  | 5301  | Bccp     |          |
| Bcdin3d  | 860   | 782   | 852   | 881   | 837   | 984   | 1011  | 983   | 1040  | 1027  | 965   | 1231  | 1068  | 1322  | 843   | 655   | 895   | 675   | 903   | 883   | 883   | 1004  | 950   | 1232  | 1086  | 1307  | 1285  | 1187  | Bcdin3d  |          |
| Bche     | 965   | 611   | 628   | 474   | 589   | 540   | 446   | 907   | 977   | 629   | 899   | 671   | 869   | 668   | 1005  | 896   | 546   | 486   | 448   | 721   | 490   | 774   | 955   | 487   | 536   | 631   | 805   | 739   | Bche     |          |
| Bckdha   | 2402  | 2864  | 2119  | 2290  | 1810  | 2025  | 1760  | 1638  | 2060  | 1747  | 1696  | 1730  | 1770  | 1432  | 2024  | 2513  | 2132  | 2111  | 2320  | 2144  | 1903  | 1516  | 2065  | 1796  | 1750  | 2018  | 1704  | 1604  | Bckdha   |          |
| Bckdhh   | 1751  | 1602  | 1795  | 1550  | 1268  | 1243  | 1532  | 1904  | 1089  | 1117  | 1103  | 1212  | 1222  | 1306  | 1714  | 1733  | 1615  | 1505  | 1382  | 1400  | 1392  | 1026  | 1028  | 1218  | 1122  | 1487  | 1302  | 1347  | Bckdhh   |          |
| Bckdk    | 2480  | 2763  | 2292  | 2065  | 1915  | 2187  | 1979  | 2549  | 3093  | 2448  | 2424  | 2993  | 2887  | 2845  |       |       |       |       |       |       |       |       |       |       |       |       |       |       |          |          |



|         |      |       |       |       |       |       |       |       |      |      |       |      |      |      |      |      |       |       |       |       |       |       |       |      |      |       |      |       |         |
|---------|------|-------|-------|-------|-------|-------|-------|-------|------|------|-------|------|------|------|------|------|-------|-------|-------|-------|-------|-------|-------|------|------|-------|------|-------|---------|
| Bcr     | 7809 | 9322  | 10016 | 12754 | 13542 | 11168 | 10758 | 6450  | 7463 | 9862 | 8135  | 8509 | 7443 | 7717 | 7920 | 8793 | 11800 | 13132 | 13712 | 8800  | 11901 | 10009 | 6575  | 8907 | 9913 | 7082  | 6579 | 7294  | Bcr     |
| Bcs11   | 1210 | 1424  | 1355  | 1445  | 1229  | 1194  | 1326  | 1169  | 1213 | 1321 | 1268  | 1257 | 1075 | 1212 | 1312 | 1301 | 1304  | 1395  | 1453  | 1306  | 1349  | 1353  | 1234  | 1395 | 1321 | 1315  | 1343 | 1247  | Bcs11   |
| Bdh1    | 1703 | 2046  | 2014  | 2117  | 2990  | 2522  | 2472  | 3362  | 3873 | 4330 | 3538  | 3346 | 2774 | 3385 | 1829 | 1755 | 2031  | 2216  | 2826  | 2571  | 2552  | 3935  | 3446  | 3982 | 4582 | 3205  | 2960 | 3153  | Bdh1    |
| Bdh2    | 209  | 135   | 127   | 102   | 101   | 113   | 95    | 236   | 307  | 252  | 269   | 190  | 186  | 162  | 175  | 166  | 109   | 109   | 82    | 123   | 88    | 100   | 292   | 228  | 143  | 316   | 182  | 145   | Bdh2    |
| Bdkrb1  | 1    | 2     | 0     | 0     | 0     | 0     | 0     | 1     | 1    | 3    | 0     | 0    | 0    | 0    | 0    | 2    | 0     | 0     | 1     | 0     | 0     | 2     | 2     | 0    | 0    | 0     | 0    | 0     | Bdkrb1  |
| Bdkrb2  | 263  | 282   | 289   | 203   | 248   | 223   | 132   | 145   | 213  | 157  | 209   | 64   | 185  | 67   | 280  | 339  | 228   | 245   | 169   | 152   | 136   | 201   | 185   | 83   | 128  | 76    | 92   | 89    | Bdkrb2  |
| Bdnf    | 744  | 570   | 775   | 634   | 597   | 595   | 521   | 285   | 252  | 245  | 291   | 150  | 346  | 158  | 669  | 685  | 650   | 616   | 548   | 551   | 571   | 232   | 346   | 175  | 210  | 106   | 143  | 170   | Bdnf    |
| Bdp1    | 8726 | 7605  | 4675  | 6894  | 5931  | 7473  | 7176  | 6633  | 5821 | 4859 | 5407  | 5340 | 5372 | 5873 | 8321 | 8139 | 4879  | 6254  | 5578  | 7986  | 7429  | 4672  | 5487  | 4088 | 5366 | 3385  | 6047 | 5028  | Bdp1    |
| Bean1   | 40   | 44    | 44    | 54    | 160   | 73    | 36    | 197   | 335  | 324  | 255   | 136  | 263  | 142  | 51   | 73   | 56    | 81    | 74    | 48    | 63    | 393   | 273   | 198  | 256  | 112   | 114  | 109   | Bean1   |
| Becn1   | 8349 | 8254  | 9051  | 8870  | 7860  | 7880  | 8503  | 7701  | 7053 | 7354 | 7234  | 8464 | 7700 | 8422 | 8331 | 7855 | 8528  | 8733  | 8117  | 7929  | 8675  | 8118  | 6852  | 7941 | 8511 | 8394  | 8481 | 8781  | Becn1   |
| Becn2   | 33   | 19    | 47    | 48    | 16    | 27    | 36    | 5     | 2    | 8    | 11    | 12   | 1    | 9    | 28   | 30   | 34    | 24    | 48    | 17    | 19    | 3     | 6     | 11   | 9    | 13    | 7    | 9     | Becn2   |
| Begain  | 641  | 902   | 912   | 1242  | 1764  | 1325  | 1184  | 1362  | 1692 | 2002 | 1918  | 1396 | 1518 | 1329 | 803  | 800  | 1293  | 1445  | 1608  | 1143  | 1352  | 2262  | 1545  | 1722 | 1983 | 1321  | 1247 | 1218  | Begain  |
| Bend3   | 634  | 593   | 984   | 810   | 1012  | 846   | 873   | 2100  | 2147 | 2992 | 2415  | 4015 | 3266 | 3472 | 669  | 600  | 1026  | 771   | 1029  | 700   | 834   | 2714  | 2073  | 3438 | 2986 | 3962  | 3579 | 3879  | Bend3   |
| Bend4   | 3519 | 4094  | 3842  | 3918  | 4125  | 3936  | 3587  | 2425  | 2043 | 2333 | 2510  | 2312 | 2262 | 2206 | 4000 | 4231 | 3999  | 4255  | 4034  | 3827  | 3947  | 2603  | 1976  | 2074 | 2539 | 1589  | 2539 | 2218  | Bend4   |
| Bend5   | 870  | 910   | 760   | 996   | 1222  | 988   | 988   | 1661  | 1990 | 1946 | 1829  | 1563 | 1682 | 1692 | 885  | 793  | 966   | 928   | 1101  | 982   | 1031  | 1920  | 1920  | 1948 | 1897 | 1620  | 1404 | 1502  | Bend5   |
| Bend6   | 431  | 416   | 417   | 590   | 1186  | 772   | 988   | 725   | 779  | 750  | 573   | 311  | 307  | 353  | 547  | 382  | 425   | 774   | 849   | 973   | 1113  | 760   | 779   | 455  | 700  | 288   | 278  | 241   | Bend6   |
| Bend7   | 422  | 460   | 644   | 523   | 650   | 486   | 582   | 579   | 412  | 439  | 405   | 443  | 509  | 443  | 485  | 344  | 532   | 469   | 658   | 510   | 570   | 565   | 390   | 442  | 444  | 420   | 480  | 452   | Bend7   |
| Best1   | 60   | 59    | 79    | 44    | 35    | 57    | 38    | 90    | 101  | 119  | 108   | 93   | 94   | 79   | 53   | 64   | 75    | 70    | 51    | 64    | 37    | 87    | 111   | 74   | 79   | 103   | 138  | 91    | Best1   |
| Best2   | 5    | 9     | 5     | 13    | 8     | 4     | 6     | 2     | 12   | 5    | 3     | 4    | 0    | 2    | 8    | 9    | 12    | 17    | 5     | 10    | 13    | 3     | 9     | 10   | 1    | 0     | 5    | 2     | Best2   |
| Best3   | 13   | 3     | 17    | 4     | 16    | 13    | 6     | 16    | 24   | 14   | 130   | 10   | 6    | 24   | 7    | 10   | 10    | 8     | 9     | 4     | 3     | 33    | 60    | 8    | 16   | 10    | 10   | 11    | Best3   |
| Bet1    | 3573 | 2701  | 3565  | 2999  | 2453  | 2525  | 2978  | 3041  | 2749 | 2493 | 2891  | 2802 | 2919 | 3007 | 3603 | 3572 | 3269  | 2956  | 2519  | 3358  | 2734  | 2533  | 2972  | 2849 | 2328 | 3055  | 2853 | 3000  | Bet1    |
| Bet11   | 736  | 856   | 934   | 833   | 748   | 780   | 738   | 865   | 996  | 907  | 1037  | 836  | 847  | 760  | 737  | 853  | 787   | 768   | 775   | 867   | 752   | 827   | 1035  | 838  | 861  | 871   | 862  | 826   | Bet11   |
| Bex1    | 3218 | 4098  | 4547  | 4712  | 4279  | 3827  | 4672  | 2395  | 2473 | 3363 | 3087  | 2942 | 2719 | 3549 | 3360 | 3006 | 4591  | 4196  | 4417  | 4825  | 4444  | 2247  | 2634  | 3375 | 3333 | 3384  | 2765 | 3538  | Bex1    |
| Bex2    | 3985 | 4790  | 6044  | 6611  | 6662  | 5808  | 7013  | 5678  | 5496 | 7664 | 6055  | 7086 | 6008 | 8689 | 4208 | 3624 | 6567  | 8674  | 6798  | 6608  | 6874  | 6171  | 5093  | 8216 | 8325 | 7997  | 6992 | 7716  | Bex2    |
| Bex3    | 9718 | 11355 | 9383  | 10033 | 8614  | 8588  | 9379  | 9255  | 8669 | 9625 | 7950  | 9105 | 9170 | 9915 | 9923 | 8479 | 10022 | 8647  | 9510  | 10316 | 9499  | 8251  | 8818  | 9597 | 9112 | 10791 | 9538 | 10460 | Bex3    |
| Bex4    | 3663 | 3484  | 3935  | 3806  | 3308  | 2804  | 4278  | 2328  | 2126 | 2456 | 1961  | 2338 | 2291 | 3179 | 3546 | 3009 | 3452  | 3478  | 3428  | 4012  | 3909  | 1973  | 2030  | 2665 | 2377 | 3252  | 2547 | 2932  | Bex4    |
| Bex6    | 2    | 1     | 0     | 0     | 0     | 0     | 0     | 0     | 0    | 0    | 10    | 4    | 1    | 1    | 0    | 1    | 0     | 0     | 0     | 0     | 0     | 0     | 2     | 0    | 0    | 1     | 2    | 0     | Bex6    |
| Bfar    | 3442 | 3531  | 3637  | 3295  | 2944  | 3303  | 3303  | 3949  | 3395 | 3498 | 3681  | 3480 | 3502 | 3498 | 3542 | 3301 | 3646  | 3232  | 3138  | 3500  | 3022  | 3557  | 3694  | 3739 | 4090 | 3795  | 3536 | 3489  | Bfar    |
| Bfsp1   | 42   | 32    | 21    | 27    | 37    | 25    | 16    | 94    | 134  | 133  | 153   | 192  | 105  | 163  | 28   | 44   | 53    | 21    | 17    | 31    | 30    | 155   | 152   | 111  | 135  | 130   | 164  | 153   | Bfsp1   |
| Bfsp2   | 32   | 12    | 29    | 34    | 24    | 22    | 15    | 96    | 76   | 78   | 67    | 91   | 75   | 80   | 30   | 28   | 38    | 26    | 23    | 48    | 18    | 32    | 94    | 132  | 88   | 103   | 72   | 76    | Bfsp2   |
| Bglap   | 32   | 31    | 24    | 38    | 26    | 21    | 34    | 18    | 26   | 13   | 6     | 28   | 25   | 32   | 13   | 18   | 16    | 33    | 36    | 22    | 34    | 13    | 16    | 20   | 29   | 38    | 35   | 18    | Bglap   |
| Bglap2  | 2    | 3     | 1     | 8     | 0     | 6     | 3     | 1     | 2    | 0    | 2     | 1    | 1    | 1    | 3    | 3    | 0     | 0     | 1     | 2     | 4     | 0     | 2     | 2    | 1    | 4     | 0    | 6     | Bglap2  |
| Bglap3  | 2    | 2     | 8     | 1     | 2     | 8     | 1     | 2     | 5    | 8    | 3     | 8    | 0    | 2    | 1    | 4    | 0     | 3     | 1     | 0     | 0     | 5     | 1     | 6    | 3    | 2     | 3    | 2     | Bglap3  |
| Bgn     | 5617 | 6863  | 6658  | 5663  | 3750  | 6852  | 2942  | 6243  | 8463 | 8048 | 11257 | 6858 | 9308 | 6036 | 6261 | 8051 | 5475  | 6934  | 3665  | 3469  | 3181  | 8644  | 10974 | 7891 | 7243 | 7754  | 7403 | 6978  | Bgn     |
| Bhlha15 | 21   | 30    | 12    | 18    | 16    | 30    | 16    | 11    | 11   | 29   | 21    | 9    | 3    | 15   | 19   | 14   | 21    | 16    | 16    | 14    | 13    | 6     | 11    | 10   | 10   | 20    | 13   | 17    | Bhlha15 |
| Bhlha9  | 1    | 7     | 1     | 5     | 6     | 4     | 3     | 6     | 5    | 7    | 3     | 2    | 1    | 0    | 4    | 2    | 12    | 10    | 2     | 8     | 4     | 2     | 3     | 3    | 1    | 1     | 13   | 0     | Bhlha9  |
| Bhlhb9  | 7951 | 6896  | 7747  | 7373  | 9011  | 8870  | 9832  | 10794 | 9489 | 9374 | 8699  | 9558 | 8245 | 9887 | 8681 | 6442 | 7880  | 7791  | 8642  | 9443  | 9094  | 10305 | 9532  | 9560 | 9754 | 9872  | 9254 | 9311  | Bhlhb9  |
| Bhlhe22 | 348  | 275   | 326   | 772   | 1838  | 1225  | 1740  | 2578  | 2106 | 2616 | 2017  | 2064 | 1472 | 2337 | 543  | 227  | 644   | 917   | 1956  | 1453  | 1982  | 2079  | 2240  | 2822 | 3609 | 1825  | 1395 | 1794  | Bhlhe22 |
| Bhlhe23 | 173  | 343   | 512   | 304   | 252   | 247   | 304   | 215   | 68   | 227  | 165   | 457  | 313  | 416  | 260  | 275  | 418   | 231   | 321   | 211   | 322   | 317   | 167   | 280  | 294  | 154   | 459  | 540   | Bhlhe23 |
| Bhlhe40 | 400  | 358   | 312   | 278   | 456   | 425   | 432   | 423   | 608  | 493  | 654   | 548  | 501  | 612  | 376  | 312  | 396   | 445   | 548   | 440   | 397   | 528   | 659   | 596  | 643  | 664   | 507  | 614   | Bhlhe40 |
| Bhlhe41 | 362  | 462   | 508   | 533   | 453   | 407   | 375   | 206   | 241  | 259  | 349   | 199  | 184  | 154  | 439  | 438  | 612   | 533   | 418   | 346   | 413   | 301   | 343   | 232  | 230  | 204   | 158  | 183   | Bhlhe41 |
| Bhmt    | 5    | 15    | 0     | 4     | 11    | 11    | 1     | 26    | 21   | 6    | 11    | 12   | 27   | 1    | 15   | 6    | 3     | 4     | 7     | 4     | 22    | 35    | 6     | 13   | 5    | 8     | 5    | Bhmt  |         |
| Bhmt2   | 2    | 6     | 0     | 3     | 6     | 1     | 2     | 0     | 7    | 3    | 2     | 10   | 5    | 3    | 4    | 3    | 2     | 1     | 0     | 0     | 4     | 3     | 6     | 0    | 0    | 1     | 2    | 0     | Bhmt2   |
| Bicc1   | 3376 | 3156  | 3267  | 2474  | 1834  | 2643  | 1253  | 2749  | 3774 | 3573 | 5526  | 3106 | 3694 | 2901 | 3320 | 4187 | 2561  | 3028  | 1444  | 1552  | 1375  | 3262  | 4804  | 3434 | 2913 | 2832  | 3477 | 2905  | Bicc1   |
| Bicd1   | 2541 | 2045  | 2420  | 3714  | 4777  | 4434  | 4879  | 4296  | 3409 | 3540 | 3538  | 3667 | 3433 | 4035 | 3264 | 2220 | 2885  | 3572  | 4154  | 4548  | 5010  | 4284  | 3079  | 3265 | 4553 | 2500  | 3543 | 3624  | Bicd1   |
| Bicd2   | 7792 | 9078  | 7898  | 8467  | 8885  | 8220  | 8168  | 7427  | 7180 | 7117 | 7329  | 7519 | 7911 | 7804 | 8257 | 8634 | 8803  | 8623  | 8722  | 8263  | 8634  | 7681  | 6530  | 6920 | 7820 | 6293  | 7594 | 7517  | Bicd2   |
| Bicd11  | 1356 | 2024  | 1923  | 2317  | 2746  | 1978  | 2202  | 1628  | 1636 | 2039 | 1852  | 1581 | 1461 | 1485 | 1551 | 1597 | 2371  | 2389  | 2471  | 2036  | 2357  | 2378  | 1704  | 1718 | 2234 | 1311  | 1429 | 1444  | Bicd11  |
| Bicd12  | 43   | 33    | 20    | 27    | 14    | 8     | 3     | 34    | 40   | 29   | 29    | 9    | 11   | 7    | 41   | 52   | 10    | 39    | 7     | 2     | 1     | 5     | 35    | 30   | 9    | 11    | 7    | 7     | Bicd12  |
| Bicra   | 1985 | 2685  | 3126  | 3264  | 3067  | 2779  | 2247  | 2484  | 2768 | 3574 | 2992  | 4012 | 2935 | 3019 | 1826 | 2182 | 3150  | 3091  | 3250  | 2039  | 2666  | 3708  | 2317  | 3746 | 3574 | 3522  | 3099 | 2893  | Bicra   |
| Bicral  | 1637 | 1692  | 2198  | 2419  | 2855  | 2319  | 2600  | 2372  | 2656 | 3317 | 3091  | 2840 | 2739 | 2869 | 1642 | 1712 | 2496  | 2585  | 3010  | 1971  | 2586  | 3507  | 2382  | 3245 | 3463 | 2145  | 2295 | 2820  | Bicral  |
| Bid     | 2043 | 2236  | 1945  | 1995  | 1891  | 1922  | 1766  | 768   | 844  | 772  | 674   | 627  | 685  | 635  | 2035 | 2110 | 1840  | 1808  | 1997  | 217   |       |       |       |      |      |       |      |       |         |

|        |       |       |       |       |       |       |       |       |       |       |       |       |       |       |       |       |       |       |       |       |       |       |       |       |       |       |       |       |        |        |       |
|--------|-------|-------|-------|-------|-------|-------|-------|-------|-------|-------|-------|-------|-------|-------|-------|-------|-------|-------|-------|-------|-------|-------|-------|-------|-------|-------|-------|-------|--------|--------|-------|
| Bmp10  | 0     | 0     | 0     | 0     | 0     | 0     | 0     | 0     | 1     | 0     | 0     | 0     | 0     | 0     | 0     | 0     | 1     | 0     | 0     | 0     | 0     | 0     | 0     | 0     | 3     | 1     | 0     | 0     | 0      | 0      | Bmp10 |
| Bmp15  | 7     | 3     | 18    | 1     | 11    | 10    | 11    | 17    | 19    | 8     | 19    | 17    | 31    | 26    | 7     | 16    | 2     | 12    | 2     | 7     | 5     | 28    | 22    | 13    | 19    | 13    | 21    | 21    | 24     | Bmp15  |       |
| Bmp2   | 441   | 229   | 258   | 242   | 172   | 231   | 144   | 388   | 443   | 381   | 562   | 267   | 311   | 209   | 257   | 293   | 226   | 269   | 136   | 119   | 148   | 426   | 498   | 400   | 251   | 332   | 265   | 250   | Bmp2   |        |       |
| Bmp2k  | 3065  | 2732  | 2881  | 3204  | 2976  | 2971  | 3085  | 1757  | 1963  | 1830  | 2004  | 1800  | 2099  | 2060  | 3128  | 3020  | 3096  | 3081  | 2829  | 2826  | 3075  | 1945  | 1948  | 1781  | 1967  | 1654  | 1977  | 2293  | Bmp2k  |        |       |
| Bmp3   | 351   | 207   | 212   | 269   | 320   | 291   | 292   | 829   | 984   | 601   | 851   | 318   | 381   | 343   | 258   | 244   | 173   | 284   | 244   | 250   | 276   | 690   | 954   | 591   | 562   | 378   | 311   | 252   | Bmp3   |        |       |
| Bmp4   | 1021  | 1044  | 1050  | 599   | 331   | 541   | 265   | 818   | 839   | 727   | 790   | 555   | 814   | 488   | 725   | 1419  | 707   | 661   | 344   | 352   | 268   | 495   | 1070  | 873   | 440   | 1130  | 723   | 655   | Bmp4   |        |       |
| Bmp5   | 1427  | 977   | 1415  | 752   | 722   | 913   | 672   | 800   | 1114  | 860   | 1691  | 630   | 879   | 663   | 1369  | 1706  | 909   | 749   | 634   | 912   | 680   | 971   | 1492  | 778   | 653   | 792   | 625   | 667   | Bmp5   |        |       |
| Bmp6   | 742   | 774   | 1019  | 648   | 794   | 619   | 486   | 519   | 630   | 686   | 778   | 481   | 642   | 397   | 800   | 861   | 731   | 759   | 641   | 667   | 566   | 675   | 962   | 521   | 561   | 524   | 475   | 502   | Bmp6   |        |       |
| Bmp7   | 2450  | 2089  | 2666  | 1831  | 1483  | 1708  | 1249  | 1998  | 2551  | 2238  | 2220  | 2207  | 2578  | 1794  | 1800  | 2764  | 1730  | 1845  | 1515  | 1664  | 1307  | 1796  | 2972  | 2355  | 1617  | 2303  | 2265  | 2129  | Bmp7   |        |       |
| Bmp8a  | 81    | 130   | 118   | 95    | 56    | 55    | 48    | 17    | 10    | 7     | 6     | 7     | 10    | 10    | 98    | 118   | 96    | 127   | 79    | 67    | 72    | 2     | 16    | 9     | 5     | 4     | 5     | 2     | Bmp8a  |        |       |
| Bmp8b  | 106   | 77    | 71    | 84    | 58    | 62    | 68    | 50    | 74    | 45    | 33    | 20    | 16    | 32    | 92    | 121   | 45    | 62    | 46    | 56    | 53    | 32    | 43    | 22    | 10    | 13    | 19    | 17    | Bmp8b  |        |       |
| Bmper  | 659   | 530   | 292   | 550   | 720   | 646   | 656   | 1299  | 1819  | 1431  | 1770  | 1222  | 781   | 1261  | 568   | 426   | 523   | 665   | 726   | 745   | 722   | 1823  | 1427  | 1548  | 1391  | 1634  | 1006  | 876   | Bmper  |        |       |
| Bmpr1a | 15050 | 10284 | 9454  | 9133  | 8980  | 10034 | 10503 | 14124 | 13035 | 9862  | 11618 | 11034 | 11609 | 11425 | 13653 | 11875 | 8960  | 9428  | 9054  | 11077 | 9553  | 9655  | 13140 | 10465 | 9310  | 11500 | 11354 | 12113 | Bmpr1a |        |       |
| Bmpr1b | 1052  | 845   | 666   | 754   | 728   | 808   | 839   | 1540  | 1474  | 1412  | 1784  | 1510  | 1660  | 1665  | 963   | 992   | 787   | 724   | 754   | 816   | 795   | 1031  | 1515  | 1658  | 1003  | 1851  | 1564  | 1337  | Bmpr1b |        |       |
| Bmpr2  | 12664 | 9413  | 9337  | 12129 | 14080 | 15719 | 15539 | 16004 | 14660 | 13448 | 15442 | 14062 | 15485 | 15398 | 12920 | 11662 | 10050 | 12545 | 12828 | 12689 | 15931 | 14952 | 14019 | 12684 | 15918 | 11218 | 15402 | 14878 | Bmpr2  |        |       |
| Bms1   | 8409  | 7789  | 9034  | 7718  | 6596  | 6759  | 7059  | 7601  | 7680  | 7946  | 7906  | 9097  | 8245  | 9105  | 7544  | 8090  | 8028  | 6957  | 6756  | 6945  | 6612  | 7005  | 7187  | 8208  | 7786  | 8856  | 8906  | 8548  | Bms1   |        |       |
| Bmt2   | 6485  | 5072  | 6083  | 6381  | 5617  | 6020  | 6911  | 4266  | 3746  | 3184  | 3362  | 3681  | 3582  | 3863  | 6587  | 5572  | 5862  | 6206  | 6192  | 5886  | 7038  | 4042  | 3698  | 3623  | 3747  | 3718  | 3719  | 3935  | Bmt2   |        |       |
| Bmx    | 15    | 16    | 24    | 19    | 31    | 32    | 18    | 48    | 58    | 37    | 54    | 84    | 77    | 62    | 32    | 20    | 22    | 14    | 19    | 23    | 24    | 87    | 87    | 66    | 71    | 80    | 76    | 65    | Bmx    |        |       |
| Bmyc   | 622   | 709   | 747   | 731   | 728   | 618   | 618   | 677   | 680   | 750   | 769   | 645   | 665   | 666   | 560   | 678   | 757   | 715   | 615   | 598   | 604   | 719   | 719   | 769   | 656   | 782   | 583   | 642   | Bmyc   |        |       |
| Bnc1   | 165   | 144   | 168   | 54    | 98    | 67    | 30    | 193   | 293   | 142   | 296   | 93    | 286   | 82    | 120   | 229   | 81    | 135   | 30    | 32    | 20    | 180   | 220   | 123   | 108   | 92    | 53    | 102   | Bnc1   |        |       |
| Bnc2   | 629   | 616   | 215   | 269   | 434   | 588   | 180   | 1362  | 1771  | 1286  | 1929  | 803   | 1757  | 813   | 541   | 815   | 194   | 305   | 224   | 484   | 349   | 901   | 1763  | 619   | 1121  | 352   | 1335  | 714   | Bnc2   |        |       |
| Bnip1  | 1337  | 1261  | 1095  | 1444  | 1493  | 1416  | 1406  | 1846  | 1931  | 2001  | 1991  | 2027  | 2088  | 2183  | 1386  | 1164  | 1236  | 1312  | 1477  | 1418  | 1398  | 2075  | 1900  | 1968  | 2040  | 1963  | 2260  | 2092  | Bnip1  |        |       |
| Bnip2  | 8222  | 7228  | 7627  | 6777  | 7325  | 7715  | 7785  | 8899  | 7559  | 7066  | 7736  | 8374  | 7743  | 8779  | 8140  | 7506  | 7582  | 6919  | 7136  | 8298  | 7750  | 7322  | 7722  | 7530  | 7748  | 7912  | 8839  | 8603  | Bnip2  |        |       |
| Bnip3  | 6590  | 5031  | 4957  | 5031  | 4635  | 4957  | 5204  | 3289  | 3108  | 3123  | 3118  | 2210  | 2851  | 2661  | 6878  | 5988  | 5129  | 5037  | 4641  | 5741  | 4711  | 2760  | 3543  | 2705  | 2556  | 2656  | 2432  | 2624  | Bnip3  |        |       |
| Bnip3l | 15132 | 12696 | 12804 | 13090 | 13061 | 13510 | 15672 | 14972 | 13182 | 12130 | 11493 | 12182 | 13113 | 13148 | 16200 | 13964 | 13428 | 13304 | 13532 | 15946 | 14765 | 12861 | 13804 | 12012 | 13075 | 12685 | 12829 | 13680 | Bnip3l |        |       |
| Bnip5  | 31    | 33    | 75    | 31    | 35    | 48    | 38    | 35    | 44    | 42    | 25    | 34    | 33    | 18    | 50    | 69    | 46    | 51    | 49    | 62    | 38    | 48    | 43    | 25    | 41    | 18    | 33    | 18    | Bnip5  |        |       |
| Bnip1l | 58    | 51    | 39    | 48    | 20    | 26    | 31    | 111   | 131   | 117   | 95    | 54    | 66    | 32    | 21    | 32    | 42    | 29    | 20    | 35    | 24    | 43    | 170   | 109   | 24    | 92    | 26    | 49    | Bnip1l |        |       |
| Boc    | 2831  | 3220  | 3818  | 3342  | 3076  | 3317  | 2421  | 4347  | 5081  | 5200  | 5303  | 5905  | 6366  | 4987  | 2656  | 3061  | 3692  | 2797  | 3813  | 2724  | 2627  | 4024  | 5288  | 5511  | 4823  | 4819  | 5617  | 5547  | Boc    |        |       |
| Bod1   | 6428  | 7622  | 6900  | 6696  | 6144  | 5982  | 6317  | 5769  | 5338  | 5194  | 4987  | 6095  | 5645  | 5885  | 6783  | 6108  | 6815  | 6342  | 6831  | 6923  | 6395  | 5041  | 5439  | 5875  | 5757  | 6730  | 6115  | 6000  | Bod1   |        |       |
| Bod1l  | 13339 | 12127 | 7899  | 10767 | 11093 | 13331 | 11852 | 12016 | 10513 | 8769  | 9271  | 8807  | 9064  | 9104  | 13887 | 13009 | 8962  | 10051 | 10137 | 13496 | 12583 | 8126  | 9939  | 7339  | 8993  | 5542  | 9508  | 7913  | Bod1l  |        |       |
| Bok    | 508   | 523   | 603   | 517   | 781   | 851   | 629   | 1155  | 1277  | 1294  | 1101  | 1518  | 1213  | 1185  | 558   | 1477  | 584   | 610   | 808   | 881   | 583   | 1125  | 1294  | 1409  | 1451  | 1396  | 1374  | 1235  | Bok    |        |       |
| Bola1  | 483   | 721   | 640   | 553   | 574   | 626   | 548   | 727   | 828   | 713   | 737   | 867   | 821   | 899   | 559   | 476   | 637   | 574   | 743   | 651   | 547   | 481   | 681   | 826   | 842   | 1099  | 1052  | 916   | Bola1  |        |       |
| Bola2  | 2519  | 3509  | 3549  | 3602  | 2712  | 2114  | 3529  | 1680  | 1560  | 1983  | 1845  | 1991  | 1898  | 2545  | 2600  | 2155  | 3545  | 3044  | 2809  | 2957  | 3356  | 1328  | 1470  | 2312  | 1909  | 2246  | 1928  | 2652  | Bola2  |        |       |
| Bola3  | 608   | 619   | 562   | 536   | 371   | 411   | 485   | 564   | 558   | 591   | 514   | 654   | 603   | 817   | 553   | 508   | 564   | 406   | 414   | 494   | 450   | 520   | 568   | 711   | 626   | 887   | 737   | 860   | Bola3  |        |       |
| Boll   | 17    | 9     | 20    | 18    | 13    | 14    | 9     | 12    | 7     | 8     | 10    | 4     | 7     | 10    | 25    | 13    | 19    | 7     | 5     | 15    | 9     | 12    | 8     | 3     | 5     | 10    | 10    | 5     | Boll   |        |       |
| Bop1   | 6245  | 8466  | 6508  | 6875  | 4997  | 5402  | 5455  | 2997  | 3447  | 3037  | 2996  | 3541  | 3328  | 3036  | 5763  | 6948  | 6582  | 6249  | 6399  | 5584  | 5704  | 2896  | 3300  | 3360  | 3342  | 3933  | 3297  | 3356  | Bop1   |        |       |
| Bora   | 5575  | 5021  | 5186  | 5225  | 3428  | 4496  | 5082  | 2267  | 2934  | 2203  | 2262  | 3419  | 3070  | 3457  | 5338  | 4995  | 4815  | 4757  | 4007  | 4319  | 4563  | 1855  | 2078  | 2887  | 2392  | 3613  | 3519  | 3447  | Bora   |        |       |
| Borcs5 | 957   | 1111  | 1116  | 1162  | 1071  | 995   | 1224  | 753   | 836   | 873   | 790   | 859   | 819   | 889   | 897   | 913   | 1185  | 1021  | 1253  | 966   | 1029  | 876   | 755   | 914   | 893   | 968   | 876   | 821   | Borcs5 |        |       |
| Borcs6 | 1126  | 1593  | 1362  | 1651  | 1521  | 1366  | 1144  | 603   | 664   | 633   | 651   | 591   | 595   | 546   | 1141  | 1336  | 1548  | 1613  | 1518  | 1239  | 1320  | 675   | 719   | 588   | 674   | 575   | 605   | 591   | Borcs6 |        |       |
| Borcs7 | 234   | 232   | 359   | 291   | 326   | 299   | 315   | 988   | 1068  | 1281  | 1159  | 1344  | 1306  | 1361  | 236   | 276   | 302   | 283   | 314   | 289   | 296   | 1213  | 1075  | 1168  | 1215  | 1336  | 1320  | 1422  | Borcs7 |        |       |
| Borcs8 | 1279  | 1564  | 1358  | 1361  | 1303  | 1202  | 1255  | 1110  | 1265  | 1218  | 1176  | 1212  | 1119  | 1148  | 1217  | 1363  | 1188  | 1343  | 1443  | 1450  | 1241  | 1024  | 1170  | 1244  | 1255  | 1211  | 1176  | 1158  | Borcs8 |        |       |
| Bpgm   | 4684  | 5675  | 5188  | 5141  | 4926  | 4726  | 5399  | 4567  | 4413  | 4309  | 3667  | 4732  | 5882  | 5336  | 5226  | 4858  | 5550  | 4693  | 5125  | 5975  | 5220  | 4197  | 4578  | 4367  | 4690  | 5032  | 5539  | 6703  | Bpgm   |        |       |
| Bphl   | 932   | 857   | 725   | 670   | 699   | 676   | 780   | 973   | 1047  | 886   | 1056  | 876   | 919   | 1014  | 862   | 747   | 775   | 761   | 635   | 775   | 691   | 832   | 1115  | 932   | 903   | 1033  | 923   | 862   | Bphl   |        |       |
| Bpi    | 0     | 3     | 0     | 0     | 2     | 3     | 1     | 0     | 0     | 0     | 0     | 0     | 1     | 0     | 0     | 4     | 0     | 5     | 5     | 2     | 2     | 1     | 0     | 0     | 0     | 1     | 2     | 0     | Bpi    |        |       |
| Bpifa1 | 0     | 0     | 0     | 0     | 0     | 0     | 0     | 2     | 13    | 2     | 2     | 0     | 0     | 0     | 0     | 0     | 0     | 0     | 0     | 0     | 0     | 0     | 17    | 2     | 0     | 0     | 0     | 0     | Bpifa1 |        |       |
| Bpifa6 | 0     | 0     | 0     | 0     | 0     | 0     | 0     | 0     | 0     | 0     | 0     | 0     | 0     | 0     | 0     | 0     | 0     | 0     | 0     | 0     | 0     | 0     | 1     | 0     | 0     | 0     | 0     | 0     | Bpifa6 |        |       |
| Bpifb1 | 0     | 2     | 0     | 0     | 5     | 0     | 7     | 1     | 2     | 0     | 7     | 3     | 0     | 2     | 0     | 0     | 0     | 0     | 5     | 13    | 5     | 8     | 2     | 3     | 1     | 3     | 1     | 0     | Bpifb1 |        |       |
| Bpifb2 | 1     | 1     | 0     | 1     | 0     | 0     | 2     | 0     | 0     | 0     | 1     | 0     | 0     | 0     | 0     | 1     | 0     | 0     | 2     | 0     | 0     | 0     | 5     | 0     | 0     | 0     | 0     | 0     | 0      | Bpifb2 |       |
| Bpifb3 | 0     | 1     | 0     | 0     | 1     | 0     | 0     | 0     | 0     | 4     | 2     | 1     | 1     | 2     | 3     | 0     | 1     | 0     | 2     | 1     | 1     | 3     | 2     | 0     | 0     | 0     | 3     | 0     | 6      | Bpifb3 |       |
| Bpifb4 | 0     | 1     | 0     | 0     | 0     | 0     | 0     | 1     | 0     | 0     | 0     | 0     | 0     | 0     | 1     | 2     | 0     | 0     | 0     | 0     | 0     | 0     | 0     | 0     | 0     | 0     | 4     | 3     | 1      | Bpifb4 |       |
| Bpifb5 | 6     | 2     | 6     | 1     | 7     | 6     | 0     | 4     | 16    | 8     | 13    | 13    | 8     | 6     |       |       |       |       |       |       |       |       |       |       |       |       |       |       |        |        |       |

|        |       |       |       |       |       |       |       |       |       |       |       |       |       |       |       |       |       |       |       |       |       |       |       |       |       |       |       |       |        |
|--------|-------|-------|-------|-------|-------|-------|-------|-------|-------|-------|-------|-------|-------|-------|-------|-------|-------|-------|-------|-------|-------|-------|-------|-------|-------|-------|-------|-------|--------|
| Brinp3 | 133   | 133   | 89    | 178   | 360   | 240   | 244   | 449   | 468   | 413   | 398   | 185   | 166   | 214   | 181   | 91    | 161   | 204   | 235   | 304   | 252   | 551   | 523   | 270   | 495   | 190   | 222   | 230   | Brinp3 |
| Brip1  | 2378  | 1859  | 1645  | 1296  | 1000  | 1271  | 1535  | 1525  | 1345  | 1056  | 1245  | 1750  | 1516  | 1665  | 1909  | 1934  | 1619  | 1224  | 1319  | 1512  | 1393  | 988   | 1274  | 1267  | 1119  | 1484  | 1687  | 1635  | Brip1  |
| Brix1  | 4103  | 3439  | 4366  | 3624  | 3382  | 3355  | 3770  | 4617  | 3954  | 4226  | 3889  | 4833  | 4453  | 4833  | 4146  | 3895  | 3894  | 3296  | 3550  | 3924  | 3447  | 4172  | 4105  | 4432  | 4066  | 5533  | 4891  | 5161  | Brix1  |
| Brk1   | 5531  | 6236  | 5601  | 5973  | 5284  | 5279  | 6200  | 5250  | 5440  | 5157  | 5384  | 5078  | 5124  | 5503  | 5943  | 5848  | 5948  | 5607  | 5576  | 6372  | 5792  | 4787  | 5311  | 5409  | 4985  | 6125  | 5542  | 6014  | Brk1   |
| Brme1  | 165   | 183   | 147   | 173   | 147   | 185   | 129   | 153   | 153   | 159   | 128   | 135   | 149   | 129   | 162   | 152   | 140   | 133   | 147   | 174   | 140   | 109   | 142   | 173   | 138   | 121   | 152   | 121   | Brme1  |
| Brms1  | 24    | 22    | 15    | 28    | 22    | 22    | 22    | 21    | 17    | 3     | 21    | 18    | 16    | 20    | 21    | 19    | 16    | 17    | 17    | 13    | 22    | 22    | 15    | 10    | 23    | 11    | 10    | 23    | Brms1  |
| Brms11 | 4058  | 3731  | 3653  | 3687  | 3730  | 3632  | 4168  | 4478  | 3821  | 3703  | 3596  | 3964  | 3644  | 3945  | 4120  | 3351  | 4164  | 3805  | 3879  | 4130  | 3897  | 4393  | 3917  | 4049  | 3967  | 3859  | 3994  | 4050  | Brms11 |
| Brox   | 6394  | 6438  | 5677  | 6857  | 8382  | 7818  | 8134  | 9987  | 8563  | 8187  | 7795  | 7783  | 7979  | 7783  | 7402  | 6591  | 6383  | 7170  | 7624  | 8963  | 8258  | 9244  | 8484  | 7616  | 8982  | 6805  | 7850  | 7741  | Brox   |
| Brp1f  | 5621  | 6862  | 6466  | 7296  | 5702  | 6078  | 5909  | 3764  | 4062  | 4432  | 4147  | 5294  | 4572  | 4859  | 5003  | 6073  | 6825  | 6729  | 6278  | 5176  | 5882  | 3918  | 3686  | 4831  | 4608  | 5311  | 5001  | 4907  | Brp1f  |
| Brp1f3 | 791   | 955   | 1225  | 939   | 1033  | 926   | 836   | 3207  | 3973  | 4339  | 4109  | 4776  | 4196  | 4850  | 740   | 862   | 1045  | 847   | 993   | 830   | 838   | 3830  | 3480  | 4349  | 4561  | 4098  | 4579  | 4767  | Brp1f3 |
| Brs3   | 0     | 0     | 0     | 0     | 2     | 3     | 1     | 4     | 1     | 6     | 2     | 0     | 2     | 0     | 0     | 0     | 0     | 7     | 4     | 0     | 1     | 13    | 10    | 0     | 1     | 0     | 0     | 1     | Brs3   |
| Brsk1  | 2993  | 3814  | 3750  | 5829  | 7543  | 6027  | 5757  | 6329  | 7207  | 9252  | 7540  | 8009  | 6527  | 7437  | 3285  | 2959  | 5131  | 6216  | 7492  | 5304  | 6738  | 9324  | 6218  | 8665  | 9719  | 6558  | 6632  | 6793  | Brsk1  |
| Brsk2  | 2751  | 3748  | 4310  | 5401  | 7468  | 6234  | 5852  | 7140  | 7329  | 9708  | 7559  | 11149 | 9213  | 10182 | 3225  | 2570  | 5533  | 5328  | 7181  | 5424  | 6404  | 10462 | 6471  | 9859  | 11819 | 8155  | 9789  | 9667  | Brsk2  |
| Brwd1  | 12637 | 11229 | 9218  | 10707 | 12422 | 13210 | 12883 | 19882 | 16813 | 14625 | 14779 | 15234 | 15018 | 16077 | 12774 | 10865 | 10128 | 10355 | 11497 | 13920 | 13408 | 16188 | 16402 | 13594 | 16317 | 12982 | 16586 | 15061 | Brwd1  |
| Brwd3  | 9777  | 7179  | 5364  | 6688  | 6945  | 8836  | 8666  | 7182  | 5694  | 4296  | 4841  | 5023  | 5180  | 5544  | 9873  | 7999  | 5421  | 6253  | 6716  | 9166  | 8847  | 4251  | 5501  | 4017  | 4959  | 3215  | 5808  | 4974  | Brwd3  |
| Bscl2  | 1744  | 2199  | 1977  | 2248  | 2197  | 2201  | 2149  | 1820  | 1999  | 2210  | 1885  | 2149  | 1977  | 2139  | 1859  | 1765  | 1971  | 1926  | 2253  | 2106  | 2229  | 2072  | 1832  | 2164  | 2316  | 1986  | 2199  | 2280  | Bscl2  |
| Bscl1  | 4241  | 5707  | 4324  | 4946  | 4054  | 4129  | 4138  | 3115  | 3597  | 3152  | 3130  | 3167  | 2894  | 3279  | 4482  | 5189  | 4570  | 4944  | 4214  | 4150  | 4118  | 3332  | 3306  | 3321  | 3242  | 3479  | 3066  | 3262  | Bscl1  |
| Bsg    | 13115 | 14610 | 12697 | 12380 | 11437 | 12014 | 10911 | 13140 | 14817 | 13930 | 14038 | 11771 | 12445 | 14000 | 12744 | 12905 | 12127 | 11660 | 11200 | 11328 | 11937 | 12788 | 16309 | 13676 | 13061 | 14130 | 12213 | 14036 | Bsg    |
| Bsn    | 2809  | 4179  | 4175  | 7814  | 10560 | 7941  | 6687  | 4608  | 5217  | 7954  | 6222  | 6574  | 5320  | 5277  | 3247  | 3374  | 6859  | 8649  | 9641  | 6026  | 8263  | 10148 | 4330  | 6673  | 9052  | 2809  | 5014  | 4766  | Bsn    |
| Bsnd   | 2     | 0     | 0     | 0     | 0     | 0     | 0     | 0     | 2     | 0     | 1     | 3     | 2     | 0     | 1     | 1     | 0     | 1     | 0     | 0     | 0     | 0     | 2     | 0     | 0     | 1     | 2     | 2     | Bsnd   |
| Bsph1  | 0     | 0     | 0     | 6     | 0     | 2     | 3     | 0     | 0     | 0     | 0     | 0     | 0     | 0     | 0     | 2     | 0     | 0     | 0     | 1     | 0     | 0     | 0     | 2     | 0     | 0     | 0     | 0     | Bsph1  |
| Bspy   | 288   | 166   | 112   | 105   | 83    | 56    | 28    | 74    | 85    | 113   | 93    | 20    | 53    | 37    | 175   | 165   | 67    | 96    | 33    | 51    | 39    | 32    | 140   | 80    | 24    | 97    | 23    | 37    | Bspy   |
| Bst1   | 3     | 4     | 24    | 8     | 4     | 9     | 4     | 5     | 6     | 7     | 11    | 20    | 8     | 5     | 4     | 11    | 2     | 11    | 0     | 2     | 4     | 8     | 5     | 5     | 10    | 5     | 9     | 5     | Bst1   |
| Bst2   | 346   | 486   | 575   | 426   | 374   | 310   | 226   | 245   | 251   | 376   | 425   | 330   | 314   | 255   | 427   | 622   | 396   | 399   | 296   | 460   | 321   | 316   | 406   | 341   | 340   | 421   | 425   | 316   | Bst2   |
| Bsx    | 103   | 105   | 108   | 129   | 103   | 78    | 145   | 101   | 96    | 100   | 94    | 171   | 12    | 199   | 69    | 50    | 115   | 94    | 111   | 106   | 137   | 137   | 89    | 179   | 150   | 230   | 148   | 176   | Bsx    |
| Bta1f  | 19615 | 12995 | 7997  | 9879  | 8971  | 13074 | 13766 | 12123 | 10239 | 6551  | 9027  | 7816  | 7294  | 8283  | 19524 | 12705 | 8524  | 9840  | 8879  | 11892 | 13371 | 6029  | 9354  | 5989  | 9007  | 6425  | 7963  | 7444  | Bta1f  |
| Btd1   | 11224 | 9192  | 9932  | 11307 | 10722 | 10813 | 12659 | 11696 | 8882  | 9111  | 9020  | 9645  | 8614  | 10361 | 12293 | 9608  | 10331 | 10692 | 11011 | 12056 | 12283 | 10527 | 9578  | 9242  | 9620  | 9698  | 9534  | 10371 | Btd1   |
| Btd10  | 3224  | 2689  | 3235  | 3218  | 3457  | 3192  | 3581  | 3504  | 3149  | 3451  | 3016  | 3276  | 2951  | 3423  | 3574  | 3027  | 3063  | 3378  | 3235  | 3204  | 3276  | 3883  | 2987  | 3151  | 3566  | 3231  | 3003  | 3294  | Btd10  |
| Btd11  | 1933  | 2105  | 2321  | 2317  | 2967  | 2388  | 2271  | 1362  | 1386  | 1480  | 1483  | 1276  | 1357  | 1146  | 2064  | 1981  | 2292  | 2626  | 2648  | 2064  | 2360  | 1733  | 1473  | 1119  | 1407  | 1000  | 1154  | 1241  | Btd11  |
| Btd16  | 1     | 2     | 2     | 4     | 2     | 5     | 0     | 0     | 2     | 1     | 1     | 9     | 1     | 1     | 4     | 5     | 0     | 0     | 2     | 3     | 4     | 2     | 3     | 2     | 1     | 1     | 0     | 1     | Btd16  |
| Btd17  | 201   | 258   | 378   | 193   | 237   | 177   | 238   | 893   | 765   | 1016  | 740   | 1662  | 1387  | 1534  | 235   | 173   | 292   | 182   | 270   | 231   | 200   | 916   | 739   | 1229  | 1139  | 1671  | 1859  | 1736  | Btd17  |
| Btd18  | 5     | 1     | 0     | 2     | 0     | 0     | 0     | 2     | 2     | 8     | 0     | 2     | 0     | 4     | 0     | 2     | 2     | 0     | 2     | 0     | 4     | 2     | 2     | 3     | 0     | 0     | 3     | 5     | Btd18  |
| Btd19  | 91    | 85    | 162   | 75    | 110   | 57    | 116   | 192   | 208   | 204   | 316   | 214   | 213   | 231   | 90    | 101   | 122   | 84    | 98    | 84    | 97    | 190   | 254   | 239   | 214   | 245   | 200   | 214   | Btd19  |
| Btd2   | 4133  | 5290  | 5307  | 4924  | 4266  | 3932  | 3565  | 3471  | 4372  | 4685  | 4552  | 4954  | 4542  | 4262  | 3666  | 4866  | 5110  | 4626  | 4747  | 3429  | 3782  | 4428  | 4623  | 4939  | 4649  | 5561  | 4321  | 4302  | Btd2   |
| Btd3   | 5531  | 5166  | 5308  | 6180  | 7596  | 7007  | 7554  | 6533  | 6223  | 6551  | 6553  | 5217  | 5532  | 5466  | 5975  | 5210  | 5589  | 6929  | 7267  | 7168  | 7204  | 7720  | 6655  | 5573  | 6745  | 4560  | 5263  | 5260  | Btd3   |
| Btd6   | 336   | 408   | 354   | 407   | 572   | 503   | 459   | 1039  | 1196  | 1059  | 1060  | 963   | 972   | 924   | 376   | 374   | 467   | 497   | 611   | 534   | 494   | 1158  | 1105  | 1073  | 1303  | 1064  | 947   | 989   | Btd6   |
| Btd7   | 11204 | 9779  | 8780  | 10327 | 10352 | 10913 | 11129 | 11546 | 10686 | 10001 | 10311 | 11081 | 10715 | 11213 | 10661 | 10678 | 9304  | 9828  | 10154 | 10582 | 10930 | 10387 | 10494 | 9713  | 10578 | 8557  | 10658 | 10615 | Btd7   |
| Btd8   | 1015  | 874   | 781   | 1029  | 1322  | 1286  | 1468  | 1548  | 1377  | 1401  | 1269  | 1322  | 1234  | 1525  | 1208  | 763   | 897   | 982   | 1195  | 1369  | 1375  | 1447  | 1361  | 1237  | 1459  | 932   | 1502  | 1267  | Btd8   |
| Btd9   | 2560  | 2998  | 2953  | 3873  | 4489  | 4000  | 3862  | 3726  | 4077  | 4736  | 4371  | 4636  | 4127  | 3951  | 2644  | 2634  | 3617  | 4118  | 4660  | 3487  | 4245  | 5310  | 3941  | 4548  | 4949  | 4136  | 3978  | 3977  | Btd9   |
| Btc    | 9     | 4     | 8     | 19    | 5     | 6     | 2     | 43    | 28    | 33    | 25    | 12    | 23    | 5     | 15    | 4     | 2     | 11    | 3     | 10    | 5     | 0     | 45    | 27    | 9     | 40    | 10    | 14    | Btc    |
| Btd    | 535   | 596   | 485   | 448   | 508   | 402   | 400   | 877   | 1159  | 859   | 1058  | 845   | 1015  | 911   | 483   | 613   | 423   | 470   | 528   | 494   | 439   | 988   | 1240  | 994   | 847   | 1014  | 893   | 1006  | Btd    |
| Btf3   | 25704 | 22521 | 25567 | 22946 | 20478 | 20517 | 24558 | 23455 | 21091 | 21836 | 21332 | 22450 | 22628 | 25683 | 26008 | 21555 | 24180 | 20585 | 22735 | 24414 | 23926 | 19199 | 22433 | 24362 | 21859 | 27466 | 24767 | 27911 | Btf3   |
| Btf34  | 7177  | 5542  | 5986  | 5491  | 5858  | 5831  | 6955  | 11479 | 9208  | 8084  | 7726  | 10038 | 9180  | 11014 | 7668  | 5802  | 5850  | 5186  | 5834  | 7458  | 6496  | 9910  | 9064  | 9172  | 9076  | 10951 | 10634 | 11145 | Btf34  |
| Btg1   | 9818  | 8053  | 8597  | 9479  | 8088  | 8483  | 9075  | 9572  | 8684  | 9194  | 8476  | 8871  | 9196  | 8846  | 9373  | 8642  | 9878  | 9382  | 8475  | 9435  | 8934  | 9332  | 9017  | 8995  | 9380  | 9598  | 8564  | 9347  | Btg1   |
| Btg2   | 4191  | 5412  | 6247  | 5015  | 4404  | 4493  | 4866  | 5195  | 4397  | 4689  | 4154  | 7128  | 6569  | 7921  | 4656  | 4630  | 6145  | 4754  | 5099  | 5002  | 4673  | 4299  | 4260  | 6454  | 5733  | 7106  | 7804  | 8336  | Btg2   |
| Btg3   | 1825  | 1792  | 2255  | 2061  | 1734  | 1851  | 2140  | 942   | 942   | 965   | 1019  | 1093  | 1056  | 1173  | 1875  | 1679  | 1992  | 1942  | 1946  | 1845  | 1885  | 784   | 1043  | 969   | 941   | 1252  | 1201  | 1320  | Btg3   |
| Btg4   | 0     | 0     | 0     | 0     | 0     | 0     | 0     | 1     | 1     | 1     | 0     | 0     | 1     | 0     | 0     | 0     | 0     | 0     | 4     | 1     | 2     | 0     | 0     | 0     | 0     | 1     | 0     | 0     | Btg4   |
| Btk    | 58    | 55    | 95    | 46    | 62    | 51    | 39    | 105   | 139   | 93    | 130   | 130   | 141   | 80    | 69    | 89    | 35    | 57    | 34    | 63    | 37    | 100   | 140   | 140   | 59    | 144   | 112   | 112   | Btk    |
| Btla   | 47    | 54    | 81    | 122   | 115   | 92    | 97    | 51    | 24    | 24    | 31    | 51    | 39    | 38    | 88    | 45    | 108   | 105   | 55    | 86    | 94    | 37    | 43    | 38    | 29    | 62    | 106   |       |        |

|              |       |       |       |       |       |       |       |       |       |       |       |       |       |       |       |       |       |       |       |       |       |       |       |       |       |       |       |       |              |
|--------------|-------|-------|-------|-------|-------|-------|-------|-------|-------|-------|-------|-------|-------|-------|-------|-------|-------|-------|-------|-------|-------|-------|-------|-------|-------|-------|-------|-------|--------------|
| C1q11        | 465   | 697   | 846   | 637   | 458   | 437   | 445   | 320   | 281   | 254   | 227   | 357   | 471   | 305   | 502   | 558   | 740   | 472   | 519   | 563   | 394   | 301   | 186   | 306   | 271   | 310   | 452   | 522   | C1q11        |
| C1q12        | 5     | 22    | 16    | 38    | 40    | 41    | 53    | 68    | 62    | 114   | 60    | 77    | 60    | 65    | 24    | 12    | 34    | 30    | 58    | 29    | 46    | 109   | 61    | 108   | 109   | 14    | 40    | 40    | C1q12        |
| C1q13        | 98    | 95    | 68    | 144   | 284   | 179   | 156   | 376   | 360   | 396   | 441   | 163   | 381   | 140   | 185   | 133   | 159   | 155   | 220   | 202   | 194   | 439   | 382   | 206   | 241   | 133   | 96    | 104   | C1q13        |
| C1q14        | 210   | 528   | 453   | 648   | 567   | 614   | 358   | 408   | 330   | 438   | 311   | 543   | 821   | 408   | 438   | 466   | 912   | 563   | 709   | 678   | 673   | 553   | 284   | 454   | 494   | 63    | 500   | 475   | C1q14        |
| C1qtnf1      | 366   | 349   | 282   | 413   | 385   | 443   | 317   | 488   | 597   | 570   | 664   | 417   | 551   | 405   | 291   | 387   | 357   | 504   | 334   | 340   | 336   | 575   | 703   | 519   | 500   | 451   | 478   | 419   | C1qtnf1      |
| C1qtnf12     | 711   | 761   | 713   | 520   | 455   | 536   | 380   | 509   | 634   | 502   | 626   | 520   | 534   | 428   | 585   | 745   | 698   | 605   | 587   | 378   | 390   | 498   | 588   | 514   | 493   | 579   | 508   | 458   | C1qtnf12     |
| C1qtnf2      | 83    | 88    | 75    | 87    | 128   | 143   | 74    | 159   | 208   | 179   | 278   | 149   | 238   | 136   | 67    | 114   | 70    | 116   | 82    | 87    | 58    | 152   | 358   | 170   | 192   | 98    | 171   | 122   | C1qtnf2      |
| C1qtnf3      | 148   | 166   | 106   | 28    | 47    | 460   | 9     | 256   | 846   | 699   | 3081  | 191   | 513   | 223   | 256   | 181   | 72    | 324   | 178   | 20    | 4     | 947   | 2941  | 322   | 596   | 41    | 182   | 261   | C1qtnf3      |
| C1qtnf6      | 706   | 784   | 825   | 602   | 508   | 768   | 310   | 1287  | 1696  | 1406  | 1752  | 1086  | 1477  | 1008  | 712   | 991   | 592   | 772   | 438   | 368   | 353   | 1308  | 2071  | 1480  | 1102  | 1415  | 1111  | 1056  | C1qtnf6      |
| C1qtnf7      | 82    | 33    | 13    | 23    | 22    | 83    | 15    | 149   | 224   | 96    | 404   | 112   | 143   | 62    | 75    | 53    | 27    | 36    | 41    | 30    | 24    | 115   | 353   | 67    | 107   | 49    | 69    | 62    | C1qtnf7      |
| C1qtnf9      | 65    | 102   | 62    | 146   | 91    | 72    | 127   | 24    | 32    | 38    | 50    | 42    | 41    | 43    | 70    | 77    | 83    | 147   | 101   | 84    | 145   | 30    | 58    | 46    | 35    | 57    | 27    | 38    | C1qtnf9      |
| C1ra         | 12    | 23    | 14    | 22    | 17    | 21    | 9     | 33    | 26    | 38    | 42    | 9     | 26    | 23    | 8     | 16    | 16    | 14    | 12    | 13    | 12    | 27    | 52    | 35    | 29    | 17    | 21    | 20    | C1ra         |
| C1rb         | 0     | 0     | 0     | 0     | 0     | 0     | 0     | 0     | 0     | 3     | 0     | 0     | 0     | 0     | 0     | 0     | 0     | 0     | 0     | 0     | 0     | 2     | 0     | 0     | 0     | 0     | 0     | 1     | C1rb         |
| C1rl         | 7     | 15    | 9     | 13    | 11    | 6     | 8     | 17    | 30    | 24    | 24    | 4     | 15    | 15    | 7     | 15    | 22    | 8     | 10    | 4     | 2     | 17    | 19    | 18    | 12    | 12    | 22    | 8     | C1rl         |
| C1s1         | 45    | 44    | 50    | 51    | 30    | 31    | 18    | 76    | 81    | 75    | 145   | 34    | 48    | 34    | 58    | 55    | 32    | 41    | 52    | 18    | 23    | 60    | 128   | 75    | 73    | 49    | 45    | 40    | C1s1         |
| C1s2         | 16    | 14    | 13    | 12    | 33    | 29    | 25    | 23    | 19    | 33    | 24    | 46    | 35    | 36    | 16    | 11    | 8     | 23    | 20    | 24    | 31    | 40    | 30    | 15    | 31    | 30    | 33    | 24    | C1s2         |
| C2           | 60    | 88    | 101   | 91    | 97    | 84    | 82    | 43    | 45    | 43    | 58    | 68    | 51    | 80    | 67    | 61    | 105   | 96    | 81    | 71    | 67    | 53    | 40    | 83    | 54    | 65    | 73    | 75    | C2           |
| C2cd         | 2921  | 2702  | 2622  | 2424  | 2673  | 2600  | 2386  | 1749  | 1780  | 1725  | 1977  | 1807  | 2039  | 1717  | 2710  | 2866  | 2473  | 2512  | 2287  | 2280  | 2298  | 1731  | 1896  | 1545  | 1626  | 1747  | 1848  | 1832  | C2cd         |
| C2cd2l       | 2718  | 4120  | 3493  | 5235  | 4359  | 4088  | 3711  | 1498  | 1760  | 1997  | 1820  | 1922  | 1751  | 1689  | 2789  | 3326  | 4320  | 5148  | 4577  | 3310  | 4158  | 2450  | 1734  | 2133  | 2349  | 1865  | 1714  | 1652  | C2cd2l       |
| C2cd3        | 4381  | 4494  | 3025  | 3554  | 3887  | 3952  | 4091  | 7708  | 7977  | 7624  | 6690  | 7982  | 7420  | 8099  | 4051  | 3922  | 3529  | 3627  | 3968  | 4114  | 4043  | 6754  | 6824  | 7242  | 7529  | 5159  | 7771  | 7335  | C2cd3        |
| C2cd4a       | 12    | 3     | 10    | 10    | 4     | 5     | 3     | 5     | 4     | 4     | 9     | 1     | 5     | 1     | 5     | 15    | 10    | 8     | 7     | 7     | 1     | 3     | 5     | 2     | 5     | 0     | 0     | 1     | C2cd4a       |
| C2cd4b       | 15    | 12    | 3     | 20    | 8     | 4     | 7     | 1     | 9     | 8     | 6     | 5     | 0     | 7     | 9     | 4     | 5     | 13    | 3     | 6     | 6     | 8     | 14    | 16    | 10    | 5     | 5     | 6     | C2cd4b       |
| C2cd4c       | 557   | 825   | 727   | 1035  | 906   | 805   | 829   | 209   | 201   | 289   | 235   | 189   | 162   | 173   | 545   | 752   | 805   | 1034  | 867   | 702   | 864   | 329   | 247   | 240   | 249   | 146   | 138   | 134   | C2cd4c       |
| C2cd4d       | 7     | 4     | 0     | 7     | 5     | 3     | 2     | 9     | 2     | 15    | 23    | 7     | 18    | 4     | 9     | 5     | 1     | 7     | 1     | 4     | 1     | 5     | 16    | 15    | 8     | 18    | 0     | 9     | C2cd4d       |
| C2cd5        | 4496  | 4442  | 4494  | 4669  | 5351  | 5420  | 5069  | 7110  | 7168  | 7631  | 7998  | 7628  | 7097  | 7648  | 4655  | 4663  | 4526  | 4708  | 5146  | 4771  | 5330  | 8002  | 6590  | 7174  | 8423  | 6275  | 7512  | 6807  | C2cd5        |
| C2cd6        | 6     | 5     | 2     | 12    | 10    | 8     | 8     | 7     | 6     | 7     | 8     | 7     | 6     | 13    | 11    | 7     | 7     | 14    | 7     | 18    | 21    | 3     | 7     | 7     | 2     | 3     | 6     | 11    | C2cd6        |
| C3           | 30    | 27    | 30    | 23    | 65    | 47    | 42    | 27    | 81    | 57    | 90    | 24    | 44    | 43    | 32    | 41    | 34    | 58    | 33    | 18    | 33    | 80    | 85    | 78    | 41    | 24    | 48    | 31    | C3           |
| C30018D20Rik | 947   | 804   | 1053  | 880   | 875   | 899   | 1015  | 1558  | 1447  | 1356  | 1322  | 1447  | 1391  | 1669  | 1013  | 883   | 956   | 818   | 959   | 1070  | 979   | 1404  | 1370  | 1527  | 1377  | 1701  | 1596  | 1521  | C30018D20Rik |
| C3ar1        | 80    | 53    | 82    | 39    | 74    | 87    | 53    | 199   | 254   | 175   | 335   | 219   | 257   | 171   | 69    | 75    | 50    | 42    | 53    | 76    | 47    | 214   | 397   | 209   | 164   | 267   | 265   | 199   | C3ar1        |
| C4b          | 0     | 0     | 0     | 4     | 6     | 10    | 1     | 0     | 7     | 1     | 32    | 1     | 2     | 12    | 1     | 2     | 6     | 0     | 0     | 8     | 1     | 3     | 2     | 2     | 5     | 0     | 5     | 15    | C4b          |
| C4bp         | 5     | 2     | 9     | 13    | 5     | 3     | 2     | 0     | 2     | 0     | 7     | 0     | 1     | 5     | 6     | 22    | 9     | 2     | 4     | 4     | 8     | 2     | 0     | 3     | 0     | 0     | 1     | 1     | C4bp         |
| C5ar1        | 30    | 18    | 37    | 31    | 24    | 22    | 27    | 40    | 39    | 54    | 65    | 31    | 75    | 51    | 34    | 29    | 15    | 39    | 19    | 17    | 28    | 75    | 83    | 78    | 49    | 38    | 42    | 55    | C5ar1        |
| C5ar2        | 0     | 5     | 16    | 3     | 2     | 4     | 2     | 6     | 6     | 6     | 18    | 12    | 5     | 13    | 4     | 6     | 16    | 11    | 2     | 1     | 3     | 10    | 21    | 13    | 15    | 13    | 3     | 20    | C5ar2        |
| C6           | 0     | 0     | 0     | 0     | 2     | 0     | 0     | 0     | 0     | 0     | 3     | 0     | 0     | 0     | 1     | 0     | 0     | 0     | 0     | 2     | 0     | 4     | 0     | 1     | 0     | 0     | 0     | 0     | C6           |
| C7           | 2     | 9     | 7     | 4     | 16    | 10    | 11    | 23    | 18    | 10    | 19    | 5     | 10    | 11    | 16    | 13    | 15    | 9     | 12    | 17    | 24    | 28    | 32    | 6     | 29    | 11    | 8     | 15    | C7           |
| C77080       | 2455  | 3105  | 3226  | 2874  | 2396  | 2304  | 1971  | 1081  | 1416  | 1567  | 1485  | 1449  | 1518  | 1274  | 2080  | 2929  | 2943  | 2760  | 2486  | 1936  | 2078  | 1644  | 1658  | 1449  | 1379  | 1521  | 1227  | 1290  | C77080       |
| C87436       | 804   | 887   | 787   | 794   | 821   | 723   | 819   | 1034  | 1057  | 981   | 834   | 1024  | 899   | 1075  | 833   | 718   | 822   | 793   | 830   | 918   | 819   | 986   | 1010  | 1037  | 984   | 1110  | 941   | 984   | C87436       |
| C8a          | 2     | 3     | 0     | 4     | 0     | 0     | 0     | 1     | 1     | 0     | 2     | 7     | 0     | 0     | 3     | 5     | 2     | 0     | 2     | 1     | 0     | 0     | 1     | 0     | 1     | 0     | 0     | 0     | C8a          |
| C8b          | 17    | 22    | 11    | 15    | 20    | 27    | 41    | 5     | 3     | 0     | 7     | 7     | 8     | 5     | 17    | 9     | 3     | 18    | 7     | 29    | 32    | 8     | 3     | 4     | 16    | 6     | 7     | 9     | C8b          |
| C8g          | 30    | 32    | 72    | 20    | 20    | 28    | 36    | 51    | 75    | 50    | 63    | 60    | 85    | 55    | 32    | 26    | 19    | 40    | 35    | 28    | 29    | 47    | 83    | 51    | 66    | 68    | 89    | 46    | C8g          |
| C9           | 1     | 1     | 0     | 3     | 0     | 0     | 0     | 0     | 1     | 0     | 4     | 0     | 1     | 1     | 3     | 3     | 6     | 1     | 0     | 0     | 3     | 0     | 2     | 0     | 0     | 1     | 7     | 1     | C9           |
| C9orf72      | 5779  | 5363  | 4780  | 6295  | 6317  | 5881  | 6931  | 4400  | 3443  | 3271  | 2908  | 3288  | 3047  | 3398  | 6862  | 5358  | 5406  | 6218  | 5828  | 7264  | 6815  | 3967  | 3422  | 3380  | 3734  | 3130  | 3349  | 3533  | C9orf72      |
| Caap1        | 2077  | 1295  | 1941  | 1737  | 1577  | 1653  | 2011  | 1702  | 1388  | 1393  | 1373  | 1844  | 1660  | 1975  | 1954  | 1580  | 1729  | 1672  | 1457  | 1756  | 1657  | 1516  | 1499  | 1667  | 1664  | 2003  | 1801  | 1996  | Caap1        |
| Cab39        | 18108 | 15724 | 16020 | 16360 | 17184 | 17158 | 19300 | 17507 | 14362 | 13824 | 12109 | 14997 | 13667 | 14690 | 19524 | 15701 | 16238 | 15983 | 17206 | 19810 | 18233 | 15842 | 13992 | 13626 | 14679 | 13687 | 14614 | 15257 | Cab39        |
| Cab39l       | 3475  | 2983  | 3131  | 2439  | 2365  | 2414  | 2428  | 2635  | 2490  | 2294  | 2220  | 2543  | 2709  | 2383  | 3280  | 3237  | 2678  | 2396  | 2413  | 2665  | 2509  | 2309  | 2636  | 2400  | 2275  | 2756  | 2613  | 2699  | Cab39l       |
| Cabccoc1     | 33    | 33    | 18    | 11    | 25    | 14    | 23    | 34    | 23    | 17    | 14    | 13    | 24    | 16    | 21    | 20    | 15    | 36    | 16    | 30    | 19    | 17    | 34    | 14    | 20    | 24    | 15    | 13    | Cabccoc1     |
| Cabin1       | 8548  | 10591 | 9745  | 11007 | 10521 | 10375 | 9219  | 5964  | 7358  | 8036  | 7557  | 8721  | 8030  | 7466  | 8147  | 10097 | 10707 | 10814 | 10961 | 8609  | 9744  | 7703  | 6950  | 7835  | 8184  | 5965  | 7620  | 7525  | Cabin1       |
| Cables1      | 329   | 314   | 313   | 277   | 420   | 350   | 310   | 454   | 480   | 584   | 463   | 458   | 439   | 357   | 318   | 361   | 321   | 326   | 418   | 369   | 289   | 563   | 508   | 458   | 498   | 440   | 408   | 367   | Cables1      |
| Cables2      | 2729  | 3017  | 2841  | 3413  | 3859  | 3377  | 3429  | 2601  | 2747  | 3481  | 3080  | 3433  | 2875  | 3114  | 2640  | 2741  | 3354  | 3735  | 3720  | 2952  | 3749  | 3674  | 2634  | 3083  | 3370  | 3188  | 2731  | 2998  | Cables2      |
| Cabp1        | 1714  | 2314  | 1949  | 3231  | 3833  | 3044  | 3479  | 843   | 1099  | 1498  | 1178  | 933   | 852   | 887   | 1833  | 1781  | 2559  | 3433  | 3775  | 2741  | 3648  | 946   | 843   | 1175  | 1373  | 545   | 590   | 565   | Cabp1        |
| Cabp4        | 0     | 0     | 0     | 1     | 0     | 0     | 0     | 0     | 0     | 0     | 0     | 0     | 0     | 0     | 0     | 0     | 0     | 0     | 0     | 0     | 0     | 0     | 0     | 0     | 0     | 0     | 0     | 0     | Cabp4        |
| Cabp5        | 48    | 70    | 97    | 123   | 86    | 73    | 96    | 20    | 24    | 41    | 27    | 25    | 17    | 26    | 62    | 78    | 130   | 139   | 80    | 67    | 121   | 43    | 27    | 33    | 37    | 26    | 27    | 19    | Cabp5        |
| Cabp7        | 126   | 191   | 163   | 273   | 419   | 263   | 225   | 164   | 139   | 146   | 181   | 136   | 177   | 102   | 153   | 119   | 234   | 255   | 333   | 302   | 313   | 194   | 126   | 159   | 197   | 130   | 132   | 138   | Cabp7        |
| Cabs1        | 0     | 0     |       |       |       |       |       |       |       |       |       |       |       |       |       |       |       |       |       |       |       |       |       |       |       |       |       |       |              |



|          |       |       |       |       |       |       |       |       |       |       |       |       |       |       |       |       |       |       |       |       |       |       |       |       |       |       |       |       |          |
|----------|-------|-------|-------|-------|-------|-------|-------|-------|-------|-------|-------|-------|-------|-------|-------|-------|-------|-------|-------|-------|-------|-------|-------|-------|-------|-------|-------|-------|----------|
| Cacng5   | 326   | 455   | 417   | 556   | 829   | 541   | 505   | 177   | 197   | 271   | 249   | 128   | 181   | 136   | 364   | 378   | 492   | 650   | 578   | 487   | 651   | 307   | 174   | 168   | 252   | 92    | 113   | 120   | Cacng5   |
| Cacng7   | 0     | 0     | 0     | 0     | 0     | 0     | 0     | 0     | 0     | 0     | 0     | 0     | 0     | 0     | 0     | 0     | 0     | 0     | 0     | 0     | 1     | 0     | 0     | 0     | 0     | 0     | 0     | 0     | Cacng7   |
| Caclin   | 2754  | 3747  | 4003  | 3696  | 3001  | 2934  | 2665  | 2383  | 2784  | 2971  | 2903  | 3744  | 3109  | 3211  | 2515  | 3315  | 4117  | 3360  | 3197  | 2680  | 2725  | 2585  | 2639  | 3491  | 3032  | 4220  | 3483  | 3216  | Caclin   |
| Cacul1   | 11064 | 8630  | 9912  | 9346  | 9548  | 9854  | 10874 | 8796  | 7168  | 6887  | 7366  | 8189  | 8151  | 8654  | 10704 | 9361  | 8941  | 9444  | 9082  | 9521  | 9975  | 8779  | 7210  | 7234  | 7877  | 7821  | 8312  | 8808  | Cacul1   |
| Cacypb   | 14397 | 11839 | 14114 | 13560 | 12103 | 12040 | 15908 | 11080 | 8469  | 8906  | 7918  | 9588  | 8882  | 10230 | 15564 | 13276 | 13726 | 12490 | 13535 | 16054 | 14674 | 8662  | 9420  | 9743  | 9010  | 10914 | 9775  | 10788 | Cacypb   |
| Cad      | 7216  | 9052  | 10653 | 9247  | 7682  | 7412  | 6800  | 5427  | 7636  | 7783  | 7875  | 11901 | 9378  | 9797  | 6319  | 8636  | 10288 | 8854  | 9040  | 6065  | 7261  | 6657  | 7217  | 9448  | 8082  | 9267  | 9417  | 10326 | Cad      |
| Cadm1    | 12572 | 11460 | 10769 | 14468 | 16299 | 14472 | 17126 | 12742 | 11998 | 12264 | 10775 | 10176 | 9804  | 10253 | 13919 | 11721 | 13446 | 14889 | 15306 | 15348 | 16479 | 14250 | 10558 | 11921 | 12974 | 11885 | 8707  | 8733  | Cadm1    |
| Cadm2    | 1187  | 936   | 850   | 2356  | 4178  | 3482  | 3572  | 2804  | 2920  | 2790  | 2684  | 1561  | 1530  | 1640  | 1626  | 1089  | 1343  | 3003  | 2983  | 3050  | 4085  | 3858  | 2523  | 1946  | 3259  | 1039  | 1205  | 1234  | Cadm2    |
| Cadm3    | 8945  | 11470 | 10300 | 17474 | 21940 | 18117 | 17252 | 10353 | 10167 | 13866 | 11585 | 9464  | 9891  | 9294  | 10961 | 9512  | 13833 | 19070 | 19112 | 15530 | 20251 | 16123 | 9950  | 10761 | 14449 | 5848  | 8178  | 8667  | Cadm3    |
| Cadm4    | 7097  | 9736  | 10222 | 14971 | 14996 | 12508 | 12496 | 8498  | 8692  | 11999 | 10084 | 11844 | 9473  | 7113  | 7644  | 6748  | 8486  | 13921 | 15257 | 11146 | 14317 | 11232 | 8141  | 12719 | 14066 | 10965 | 10282 | 11132 | Cadm4    |
| Cadps    | 5508  | 6374  | 4757  | 7979  | 12210 | 10002 | 10793 | 11871 | 10223 | 11164 | 9699  | 8430  | 8940  | 8495  | 7477  | 5991  | 6686  | 8745  | 9700  | 10323 | 11256 | 12790 | 10087 | 8391  | 11065 | 5293  | 7877  | 7888  | Cadps    |
| Cadps2   | 734   | 584   | 507   | 679   | 918   | 710   | 940   | 1056  | 1018  | 858   | 759   | 658   | 575   | 594   | 754   | 574   | 517   | 800   | 709   | 866   | 879   | 1029  | 891   | 812   | 731   | 787   | 629   | 551   | Cadps2   |
| Caee1    | 247   | 255   | 171   | 206   | 264   | 242   | 275   | 234   | 259   | 196   | 239   | 180   | 163   | 180   | 274   | 269   | 198   | 220   | 211   | 297   | 237   | 197   | 229   | 163   | 227   | 137   | 209   | 126   | Caee1    |
| Calb1    | 901   | 744   | 723   | 1162  | 1256  | 1159  | 1755  | 1272  | 926   | 1042  | 923   | 1106  | 633   | 1294  | 843   | 642   | 942   | 1195  | 1273  | 1309  | 1545  | 1482  | 1009  | 1283  | 1272  | 1305  | 986   | 1131  | Calb1    |
| Calb2    | 386   | 429   | 327   | 789   | 855   | 756   | 1044  | 790   | 928   | 875   | 715   | 647   | 499   | 792   | 555   | 414   | 446   | 724   | 897   | 819   | 919   | 797   | 847   | 973   | 994   | 909   | 519   | 634   | Calb2    |
| Calca    | 869   | 959   | 1022  | 596   | 461   | 576   | 258   | 469   | 607   | 444   | 502   | 711   | 956   | 752   | 986   | 1197  | 936   | 854   | 295   | 268   | 274   | 690   | 535   | 533   | 519   | 852   | 774   | 703   | Calca    |
| Calcb    | 45    | 43    | 36    | 38    | 40    | 19    | 11    | 18    | 26    | 25    | 36    | 24    | 52    | 22    | 47    | 73    | 36    | 40    | 4     | 12    | 7     | 25    | 21    | 20    | 19    | 32    | 24    | 31    | Calcb    |
| Calcoco1 | 6522  | 8065  | 7677  | 8654  | 7203  | 7127  | 7375  | 4212  | 4838  | 4627  | 4632  | 4546  | 4223  | 4142  | 6444  | 7498  | 8115  | 8392  | 7711  | 6814  | 7398  | 4583  | 4926  | 4903  | 4886  | 4563  | 3871  | 4059  | Calcoco1 |
| Calcoco2 | 0     | 0     | 0     | 0     | 0     | 0     | 0     | 0     | 0     | 0     | 0     | 0     | 0     | 0     | 0     | 0     | 0     | 0     | 0     | 0     | 1     | 2     | 5     | 1     | 1     | 5     | 0     | 7     | Calcoco2 |
| Calcr    | 241   | 297   | 156   | 369   | 506   | 440   | 444   | 554   | 272   | 411   | 319   | 232   | 256   | 213   | 406   | 240   | 367   | 434   | 350   | 431   | 430   | 623   | 354   | 323   | 475   | 248   | 230   | 166   | Calcr    |
| Calcr1   | 1321  | 678   | 1033  | 746   | 767   | 751   | 781   | 1227  | 1244  | 1086  | 1354  | 981   | 1338  | 1106  | 1100  | 1200  | 782   | 768   | 637   | 999   | 731   | 1113  | 1737  | 1090  | 919   | 1427  | 1207  | 1218  | Calcr1   |
| Calcl1   | 19890 | 13998 | 15608 | 9899  | 7967  | 11347 | 7573  | 16248 | 17153 | 15150 | 17891 | 14588 | 18191 | 15123 | 17795 | 20845 | 12067 | 10830 | 7635  | 8269  | 7617  | 13231 | 19181 | 15641 | 11406 | 1708  | 16837 | 16555 | Calcl1   |
| Calhm1   | 0     | 0     | 0     | 0     | 0     | 2     | 0     | 0     | 0     | 0     | 0     | 0     | 0     | 0     | 0     | 0     | 0     | 0     | 0     | 0     | 0     | 0     | 0     | 0     | 0     | 0     | 0     | 0     | Calhm1   |
| Calhm2   | 50    | 24    | 45    | 35    | 37    | 40    | 25    | 103   | 150   | 134   | 199   | 114   | 139   | 103   | 33    | 40    | 32    | 24    | 40    | 30    | 29    | 94    | 201   | 168   | 124   | 134   | 126   | 116   | Calhm2   |
| Calhm3   | 0     | 1     | 0     | 9     | 2     | 0     | 4     | 0     | 0     | 0     | 0     | 0     | 0     | 0     | 0     | 0     | 0     | 2     | 0     | 0     | 2     | 0     | 0     | 0     | 0     | 1     | 0     | 0     | Calhm3   |
| Calhm4   | 0     | 0     | 0     | 0     | 1     | 0     | 3     | 0     | 0     | 0     | 0     | 1     | 0     | 0     | 0     | 1     | 3     | 1     | 0     | 3     | 3     | 0     | 1     | 1     | 0     | 2     | 0     | 0     | Calhm4   |
| Calhm5   | 42    | 40    | 78    | 26    | 43    | 62    | 31    | 87    | 87    | 87    | 97    | 54    | 68    | 82    | 57    | 59    | 27    | 45    | 20    | 39    | 31    | 75    | 116   | 80    | 83    | 57    | 84    | 87    | Calhm5   |
| Calhm6   | 21    | 9     | 9     | 9     | 9     | 1     | 9     | 10    | 17    | 7     | 12    | 10    | 17    | 11    | 12    | 12    | 7     | 8     | 4     | 4     | 14    | 13    | 8     | 7     | 4     | 10    | 10    | 4     | Calhm6   |
| Calml1   | 60584 | 61190 | 56252 | 61473 | 60296 | 58434 | 65067 | 48778 | 43218 | 42320 | 39332 | 40999 | 38519 | 41751 | 68880 | 57545 | 58961 | 62704 | 59539 | 67913 | 64068 | 46023 | 44067 | 42225 | 44378 | 42459 | 42424 | 43151 | Calml1   |
| Calml2   | 33846 | 30751 | 29806 | 35630 | 39606 | 35452 | 42102 | 49515 | 41525 | 38327 | 36988 | 37074 | 35722 | 42258 | 42475 | 34158 | 32609 | 35588 | 36563 | 46097 | 40712 | 43387 | 43328 | 38888 | 41183 | 42711 | 37829 | 40937 | Calml2   |
| Calml3   | 27084 | 34922 | 31593 | 33307 | 36231 | 31764 | 31969 | 28556 | 31883 | 32871 | 30411 | 27710 | 27535 | 28838 | 28537 | 29845 | 33642 | 34297 | 35011 | 34006 | 34731 | 29711 | 32402 | 31530 | 32427 | 29904 | 27444 | 28802 | Calml3   |
| Calml4   | 1     | 0     | 3     | 3     | 0     | 0     | 0     | 1     | 13    | 0     | 0     | 0     | 0     | 0     | 0     | 0     | 0     | 0     | 0     | 0     | 0     | 0     | 8     | 5     | 3     | 0     | 0     | 1     | Calml4   |
| Calml5   | 0     | 0     | 0     | 0     | 1     | 0     | 0     | 0     | 0     | 0     | 0     | 0     | 0     | 0     | 0     | 0     | 0     | 0     | 0     | 0     | 0     | 0     | 0     | 0     | 0     | 0     | 0     | 0     | Calml5   |
| Calml3   | 7     | 5     | 4     | 2     | 0     | 0     | 0     | 26    | 43    | 30    | 22    | 12    | 14    | 6     | 3     | 5     | 8     | 11    | 1     | 0     | 0     | 0     | 49    | 18    | 0     | 3     | 6     | 6     | Calml3   |
| Calml4   | 68    | 110   | 73    | 89    | 218   | 117   | 118   | 200   | 251   | 227   | 261   | 191   | 280   | 99    | 83    | 132   | 54    | 108   | 89    | 107   | 139   | 247   | 355   | 156   | 176   | 64    | 114   | 104   | Calml4   |
| Caln1    | 204   | 162   | 58    | 349   | 780   | 425   | 431   | 617   | 758   | 753   | 771   | 230   | 325   | 243   | 203   | 186   | 144   | 347   | 381   | 354   | 570   | 1046  | 742   | 478   | 611   | 225   | 202   | 220   | Caln1    |
| Calr     | 52246 | 51227 | 57541 | 48965 | 37642 | 38456 | 45306 | 42140 | 41861 | 43328 | 47184 | 37276 | 41374 | 43296 | 51696 | 51648 | 51481 | 49052 | 44063 | 39032 | 44721 | 42902 | 43713 | 45555 | 39847 | 43180 | 39574 | 45525 | Calr     |
| Calr3    | 31    | 35    | 33    | 19    | 25    | 45    | 36    | 55    | 50    | 46    | 35    | 53    | 48    | 76    | 42    | 32    | 20    | 19    | 24    | 44    | 27    | 55    | 58    | 65    | 40    | 51    | 73    | 61    | Calr3    |
| Calr4    | 8     | 22    | 6     | 24    | 30    | 21    | 20    | 85    | 50    | 58    | 66    | 28    | 77    | 29    | 36    | 39    | 7     | 12    | 18    | 14    | 21    | 82    | 82    | 38    | 50    | 40    | 37    | 31    | Calr4    |
| Calu     | 39431 | 33251 | 32998 | 27539 | 22602 | 26668 | 26024 | 27612 | 27964 | 23261 | 29051 | 22718 | 24267 | 23126 | 39655 | 38167 | 29080 | 29366 | 23474 | 28821 | 24643 | 24533 | 31400 | 23308 | 21981 | 24273 | 23474 | 24318 | Calu     |
| Calv     | 368   | 580   | 354   | 797   | 975   | 807   | 886   | 506   | 643   | 622   | 563   | 363   | 310   | 393   | 426   | 328   | 584   | 731   | 899   | 882   | 904   | 799   | 596   | 579   | 708   | 379   | 367   | 290   | Calv     |
| Camk1    | 1521  | 1409  | 1364  | 1371  | 1750  | 1613  | 1444  | 2431  | 2611  | 2403  | 2691  | 2228  | 2180  | 2331  | 1527  | 1604  | 1462  | 1559  | 1531  | 1555  | 1490  | 2734  | 2678  | 2589  | 2459  | 2197  | 2157  | 2324  | Camk1    |
| Camk1d   | 833   | 751   | 743   | 1071  | 1598  | 1496  | 1678  | 1373  | 1710  | 1716  | 1498  | 1259  | 1046  | 1211  | 819   | 834   | 864   | 1399  | 1524  | 1238  | 1661  | 1731  | 1709  | 1428  | 1682  | 726   | 981   | 909   | Camk1d   |
| Camk1g   | 1633  | 1694  | 1352  | 1764  | 2171  | 1937  | 1979  | 1728  | 1768  | 1672  | 1418  | 1592  | 1318  | 1530  | 1671  | 1424  | 1572  | 1797  | 1973  | 2109  | 2071  | 2125  | 1600  | 1696  | 1937  | 1344  | 1434  | 1387  | Camk1g   |
| Camk2a   | 3832  | 5135  | 3623  | 6042  | 5788  | 6003  | 6943  | 2292  | 2703  | 2835  | 2689  | 3535  | 1918  | 3331  | 3872  | 3009  | 5493  | 6501  | 6680  | 5976  | 6922  | 3228  | 2626  | 3219  | 3391  | 3363  | 2500  | 2524  | Camk2a   |
| Camk2b   | 1020  | 1354  | 921   | 3099  | 5747  | 3765  | 3974  | 2766  | 3760  | 4438  | 3704  | 1934  | 1804  | 1865  | 1303  | 989   | 1977  | 3853  | 4498  | 3889  | 4492  | 5103  | 3305  | 3356  | 4835  | 1377  | 1457  | 1413  | Camk2b   |
| Camk2d   | 2819  | 2257  | 2290  | 3145  | 4407  | 3719  | 3662  | 3368  | 3545  | 3585  | 3938  | 2351  | 2418  | 2287  | 3237  | 2696  | 5286  | 3239  | 3388  | 3502  | 3684  | 4114  | 3863  | 2827  | 3299  | 2256  | 1977  | 2029  | Camk2d   |
| Camk2g   | 6605  | 6989  | 5505  | 6899  | 8303  | 8304  | 7632  | 5873  | 6562  | 6134  | 6259  | 5970  | 5929  | 5751  | 6637  | 6809  | 6743  | 7559  | 7635  | 7576  | 7973  | 6378  | 6195  | 5641  | 6581  | 5767  | 6030  | 5389  | Camk2g   |
| Camk2n1  | 3233  | 3388  | 5158  | 5227  | 6679  | 5752  | 6214  | 5722  | 4102  | 5790  | 5131  | 4729  | 4995  | 5698  | 4007  | 3309  | 5599  | 5447  | 6620  | 5807  | 6821  | 6667  | 4840  | 5999  | 6598  | 4213  | 5112  | 5797  | Camk2n1  |
| Camk2n2  |       |       |       |       |       |       |       |       |       |       |       |       |       |       |       |       |       |       |       |       |       |       |       |       |       |       |       |       |          |

|         |       |       |       |       |       |       |       |       |       |       |       |       |       |       |       |       |       |       |       |       |       |       |       |       |       |       |       |         |         |
|---------|-------|-------|-------|-------|-------|-------|-------|-------|-------|-------|-------|-------|-------|-------|-------|-------|-------|-------|-------|-------|-------|-------|-------|-------|-------|-------|-------|---------|---------|
| Capn7   | 9666  | 8543  | 7461  | 9228  | 9585  | 9775  | 10321 | 9493  | 7495  | 6979  | 7362  | 6960  | 6546  | 7009  | 10578 | 8614  | 7922  | 9044  | 8827  | 10815 | 10226 | 8641  | 8036  | 6713  | 7612  | 5906  | 6833  | 6577    | Capn7   |
| Capn8   | 10    | 14    | 0     | 13    | 30    | 12    | 15    | 29    | 30    | 19    | 27    | 30    | 12    | 17    | 17    | 9     | 17    | 10    | 5     | 25    | 9     | 15    | 10    | 12    | 18    | 10    | 14    | 12      | Capn8   |
| Capn9   | 5     | 3     | 1     | 5     | 3     | 0     | 7     | 0     | 2     | 8     | 4     | 1     | 0     | 5     | 3     | 2     | 2     | 6     | 2     | 0     | 4     | 2     | 1     | 0     | 4     | 2     | 1     | 6       | Capn9   |
| Capns1  | 10691 | 12461 | 10100 | 9885  | 9045  | 9352  | 8574  | 7351  | 8397  | 7304  | 8005  | 6769  | 7764  | 6771  | 10437 | 11157 | 9959  | 9765  | 9840  | 8758  | 8854  | 7636  | 8989  | 7205  | 6970  | 8047  | 7348  | 7382    | Capns1  |
| Capns2  | 69    | 108   | 7     | 37    | 62    | 83    | 54    | 85    | 86    | 47    | 93    | 43    | 25    | 36    | 99    | 114   | 14    | 39    | 41    | 91    | 70    | 15    | 93    | 29    | 26    | 9     | 33    | 17      | Capns2  |
| Caprin1 | 43382 | 39523 | 43057 | 38687 | 43228 | 41527 | 46241 | 78053 | 64320 | 61547 | 57519 | 71664 | 65022 | 71738 | 47329 | 38871 | 41773 | 38660 | 43302 | 47056 | 44590 | 65702 | 62239 | 65716 | 68530 | 71335 | 72471 | 74656   | Caprin1 |
| Caprin2 | 4610  | 3655  | 3553  | 3310  | 2971  | 3673  | 3463  | 2943  | 2700  | 2668  | 2713  | 3023  | 3136  | 2981  | 4301  | 3981  | 3364  | 3361  | 2823  | 3651  | 3342  | 2650  | 2700  | 2393  | 2574  | 2389  | 3274  | 2962    | Caprin2 |
| Caps2   | 44    | 31    | 34    | 53    | 84    | 61    | 72    | 57    | 82    | 98    | 91    | 75    | 76    | 90    | 49    | 50    | 58    | 39    | 48    | 62    | 48    | 104   | 98    | 69    | 38    | 95    | 59    | 71      | Caps2   |
| Capa1   | 13    | 21    | 9     | 26    | 28    | 67    | 36    | 43    | 42    | 43    | 38    | 38    | 65    | 22    | 33    | 33    | 15    | 14    | 32    | 31    | 22    | 43    | 64    | 35    | 35    | 53    | 16    | 28      | Capa1   |
| Capza1  | 12998 | 10804 | 11208 | 9490  | 9673  | 10077 | 11263 | 14396 | 12529 | 10343 | 10774 | 12029 | 12169 | 12192 | 14122 | 12136 | 10339 | 9515  | 9735  | 12426 | 10144 | 11882 | 12908 | 11037 | 11277 | 13013 | 12740 | 12892   | Capza1  |
| Capza2  | 13434 | 10285 | 13062 | 11852 | 12390 | 12046 | 13957 | 15358 | 12824 | 12677 | 13291 | 14685 | 13674 | 15403 | 14029 | 11998 | 12399 | 12394 | 12249 | 12968 | 12635 | 14297 | 13496 | 13410 | 13538 | 15687 | 14587 | 16021   | Capza2  |
| Capzb   | 13666 | 14251 | 13981 | 12856 | 11952 | 11836 | 11824 | 10953 | 11602 | 11763 | 11486 | 12041 | 12301 | 12588 | 12879 | 13403 | 13786 | 12660 | 12436 | 11173 | 12871 | 10572 | 12435 | 12412 | 11111 | 13622 | 11993 | 13190   | Capzb   |
| Car1    | 1     | 4     | 5     | 3     | 0     | 4     | 3     | 4     | 1     | 0     | 1     | 0     | 2     | 3     | 1     | 3     | 0     | 0     | 0     | 0     | 1     | 2     | 1     | 0     | 0     | 1     | 5     | Car1    |         |
| Car10   | 262   | 377   | 341   | 524   | 1455  | 700   | 711   | 812   | 844   | 1058  | 953   | 390   | 611   | 380   | 508   | 437   | 440   | 669   | 736   | 684   | 808   | 1497  | 987   | 538   | 921   | 222   | 397   | 354     | Car10   |
| Car11   | 572   | 853   | 692   | 944   | 1397  | 981   | 926   | 1208  | 1245  | 1601  | 1421  | 1021  | 1234  | 1047  | 731   | 810   | 1014  | 1120  | 1206  | 1060  | 1082  | 1699  | 1253  | 1313  | 1561  | 774   | 1027  | 864     | Car11   |
| Car12   | 582   | 401   | 271   | 389   | 522   | 378   | 383   | 648   | 796   | 686   | 693   | 239   | 342   | 194   | 429   | 511   | 251   | 335   | 390   | 383   | 415   | 545   | 1244  | 473   | 286   | 372   | 139   | 179     | Car12   |
| Car13   | 495   | 369   | 404   | 195   | 209   | 234   | 162   | 293   | 325   | 263   | 337   | 217   | 308   | 211   | 378   | 476   | 214   | 284   | 133   | 163   | 127   | 302   | 302   | 169   | 132   | 222   | 242   | 223     | Car13   |
| Car14   | 841   | 673   | 797   | 524   | 586   | 629   | 578   | 898   | 803   | 842   | 614   | 1069  | 1178  | 1196  | 674   | 720   | 581   | 346   | 645   | 739   | 642   | 453   | 869   | 1034  | 870   | 1461  | 1147  | 1342    | Car14   |
| Car15   | 129   | 138   | 197   | 179   | 186   | 97    | 222   | 106   | 77    | 98    | 94    | 111   | 59    | 126   | 127   | 97    | 188   | 177   | 231   | 117   | 198   | 152   | 65    | 122   | 113   | 73    | 83    | 91      | Car15   |
| Car2    | 1263  | 1701  | 1579  | 696   | 637   | 684   | 741   | 873   | 1194  | 890   | 797   | 1126  | 2658  | 1877  | 1557  | 1668  | 947   | 673   | 677   | 1037  | 687   | 675   | 1229  | 815   | 695   | 1323  | 1502  | 3593    | Car2    |
| Car3    | 75    | 64    | 115   | 39    | 63    | 46    | 36    | 76    | 150   | 109   | 246   | 68    | 136   | 119   | 69    | 95    | 67    | 52    | 53    | 62    | 41    | 115   | 179   | 76    | 140   | 38    | 99    | 109     | Car3    |
| Car4    | 99    | 106   | 171   | 89    | 108   | 93    | 114   | 84    | 73    | 102   | 68    | 79    | 93    | 90    | 100   | 130   | 103   | 119   | 94    | 129   | 100   | 149   | 60    | 60    | 103   | 93    | 131   | 108     | Car4    |
| Car5a   | 9     | 3     | 2     | 3     | 7     | 7     | 4     | 4     | 2     | 11    | 9     | 7     | 3     | 2     | 7     | 3     | 9     | 8     | 10    | 9     | 5     | 5     | 6     | 7     | 8     | 4     | 6     | 12      | Car5a   |
| Car5b   | 572   | 418   | 457   | 328   | 289   | 308   | 327   | 77    | 92    | 65    | 80    | 49    | 58    | 63    | 493   | 562   | 440   | 386   | 244   | 308   | 297   | 92    | 91    | 47    | 51    | 58    | 67    | 52      | Car5b   |
| Car6    | 0     | 1     | 1     | 0     | 1     | 0     | 1     | 7     | 4     | 3     | 9     | 2     | 11    | 4     | 5     | 2     | 2     | 2     | 2     | 2     | 1     | 3     | 3     | 7     | 1     | 11    | 8     | 4       | Car6    |
| Car7    | 120   | 161   | 97    | 156   | 142   | 131   | 120   | 44    | 61    | 63    | 41    | 55    | 51    | 54    | 127   | 118   | 160   | 136   | 132   | 186   | 150   | 45    | 48    | 71    | 63    | 47    | 43    | 58      | Car7    |
| Car8    | 648   | 473   | 458   | 448   | 486   | 403   | 468   | 191   | 222   | 175   | 249   | 185   | 163   | 152   | 534   | 563   | 448   | 479   | 396   | 382   | 431   | 217   | 291   | 179   | 141   | 186   | 172   | 157     | Car8    |
| Car9    | 40    | 20    | 40    | 27    | 25    | 18    | 22    | 23    | 35    | 13    | 44    | 20    | 20    | 24    | 29    | 39    | 31    | 39    | 19    | 26    | 17    | 25    | 37    | 31    | 39    | 47    | 22    | 36      | Car9    |
| Card10  | 1093  | 1447  | 1523  | 1232  | 1078  | 1050  | 839   | 333   | 575   | 475   | 659   | 436   | 532   | 399   | 1031  | 1448  | 1360  | 1217  | 1083  | 855   | 809   | 404   | 622   | 500   | 380   | 556   | 485   | 379     | Card10  |
| Card11  | 7     | 6     | 1     | 1     | 10    | 9     | 2     | 10    | 16    | 14    | 35    | 18    | 5     | 9     | 1     | 9     | 6     | 12    | 3     | 4     | 8     | 33    | 17    | 11    | 3     | 2     | 5     | 9       | Card11  |
| Card14  | 12    | 6     | 9     | 3     | 2     | 4     | 0     | 24    | 48    | 30    | 21    | 16    | 16    | 24    | 9     | 10    | 5     | 11    | 5     | 0     | 2     | 3     | 65    | 21    | 5     | 17    | 10    | 27      | Card14  |
| Card19  | 625   | 717   | 606   | 670   | 567   | 553   | 551   | 233   | 349   | 365   | 321   | 191   | 304   | 184   | 580   | 720   | 586   | 679   | 568   | 565   | 506   | 299   | 353   | 236   | 226   | 242   | 201   | 171     | Card19  |
| Card6   | 164   | 158   | 196   | 164   | 151   | 159   | 162   | 198   | 211   | 195   | 322   | 209   | 249   | 179   | 182   | 167   | 191   | 208   | 176   | 112   | 147   | 202   | 261   | 227   | 208   | 267   | 171   | 157     | Card6   |
| Card9   | 60    | 99    | 77    | 96    | 97    | 86    | 66    | 62    | 63    | 57    | 72    | 62    | 82    | 57    | 63    | 92    | 90    | 106   | 77    | 83    | 53    | 70    | 86    | 69    | 68    | 86    | 86    | 66      | Card9   |
| Carf    | 1300  | 920   | 905   | 1250  | 1297  | 1295  | 1440  | 1557  | 1563  | 1509  | 1808  | 1477  | 1558  | 1623  | 1273  | 1136  | 1125  | 1170  | 1114  | 1233  | 1412  | 1644  | 1598  | 1389  | 1573  | 1193  | 1404  | 1456    | Carf    |
| Carhsp1 | 23286 | 26984 | 29445 | 27421 | 25830 | 25518 | 26492 | 13423 | 12114 | 13709 | 13375 | 16725 | 15234 | 24331 | 23637 | 28971 | 26053 | 28409 | 23326 | 26311 | 15944 | 12101 | 15143 | 15919 | 15967 | 16784 | 17764 | Carhsp1 |         |
| Carlr   | 29    | 46    | 40    | 78    | 48    | 42    | 51    | 55    | 39    | 40    | 66    | 79    | 44    | 83    | 62    | 23    | 83    | 36    | 51    | 73    | 47    | 55    | 27    | 48    | 52    | 69    | 80    | 72      | Carlr   |
| Carm1   | 5188  | 5935  | 6800  | 5606  | 5808  | 5574  | 4708  | 6322  | 7531  | 8246  | 8204  | 9131  | 8196  | 7665  | 4584  | 5692  | 6406  | 5212  | 6201  | 4368  | 5223  | 8056  | 7526  | 8436  | 7789  | 10080 | 7458  | 7990    | Carm1   |
| Carmil1 | 1583  | 1535  | 1384  | 1307  | 1541  | 1554  | 1571  | 1917  | 2357  | 2061  | 2161  | 1858  | 1845  | 1932  | 1341  | 1562  | 1289  | 1454  | 1504  | 1139  | 1481  | 2082  | 2062  | 2052  | 1972  | 1843  | 1714  | 1683    | Carmil1 |
| Carmil2 | 329   | 475   | 702   | 665   | 1015  | 750   | 624   | 789   | 817   | 1040  | 947   | 831   | 838   | 738   | 413   | 463   | 662   | 725   | 863   | 624   | 742   | 1247  | 750   | 928   | 1012  | 692   | 722   | 672     | Carmil2 |
| Carmil3 | 4673  | 6541  | 6404  | 9002  | 10541 | 9193  | 9426  | 6379  | 8137  | 10074 | 7378  | 9394  | 7043  | 8212  | 4894  | 5127  | 8248  | 9590  | 11176 | 8306  | 9487  | 9449  | 6601  | 10245 | 10968 | 8028  | 7124  | 6636    | Carmil3 |
| Carmmt1 | 2655  | 1815  | 2444  | 1902  | 1837  | 2137  | 2090  | 1785  | 1523  | 1458  | 1413  | 1824  | 2016  | 1994  | 2371  | 2364  | 1897  | 1966  | 1940  | 1981  | 1920  | 1589  | 2043  | 1722  | 1492  | 1928  | 1643  | 1816    | Carmmt1 |
| Carns1  | 8     | 4     | 5     | 4     | 2     | 2     | 6     | 10    | 5     | 3     | 5     | 5     | 9     | 11    | 7     | 5     | 0     | 6     | 4     | 4     | 2     | 8     | 3     | 5     | 1     | 5     | 5     | 6       | Carns1  |
| Cars    | 4585  | 4958  | 4691  | 4387  | 3989  | 4110  | 4053  | 2937  | 3264  | 3354  | 3210  | 3653  | 3327  | 4110  | 4159  | 4330  | 4354  | 4252  | 4120  | 4119  | 4081  | 3080  | 3039  | 3396  | 3538  | 4011  | 3656  | 4086    | Cars    |
| Cars2   | 1551  | 1573  | 1342  | 1631  | 1342  | 1509  | 1455  | 1473  | 1828  | 1745  | 1970  | 1714  | 1566  | 1487  | 1274  | 1492  | 1516  | 1536  | 1472  | 1488  | 1339  | 1721  | 1745  | 1726  | 1872  | 1647  | 1531  | 1402    | Cars2   |
| Cartpt  | 187   | 227   | 260   | 174   | 185   | 155   | 207   | 216   | 171   | 173   | 198   | 301   | 310   | 366   | 202   | 181   | 272   | 160   | 164   | 264   | 158   | 212   | 210   | 228   | 161   | 234   | 535   | 503     | Cartpt  |
| Casc1   | 849   | 730   | 512   | 856   | 626   | 753   | 873   | 256   | 266   | 203   | 209   | 202   | 228   | 211   | 872   | 813   | 629   | 914   | 670   | 764   | 891   | 212   | 227   | 186   | 173   | 168   | 237   | 222     | Casc1   |
| Casc3   | 6660  | 7157  | 8544  | 9467  | 7969  | 7969  | 8495  | 7052  | 7381  | 9070  | 8132  | 10230 | 8846  | 10146 | 6389  | 6887  | 8985  | 9591  | 8917  | 6739  | 8631  | 9514  | 6827  | 10059 | 9366  | 10424 | 8875  | 9597    | Casc3   |
| Casd1   | 2531  | 2115  | 2075  | 2045  | 2576  | 2401  | 2481  | 7897  | 6990  | 6020  | 6302  | 6217  | 6366  | 6092  | 2815  | 2368  | 2121  | 1954  | 2299  | 2833  | 2299  | 6976  | 6757  | 5811  | 6215  | 6205  | 6564  | 6037    | Casd1   |
| Cask    | 7874  | 7083  | 6854  | 8785  | 11105 | 10483 | 10625 | 12422 | 11330 | 12451 | 11909 | 10875 | 10957 | 11446 | 8420  | 7100  | 7737  | 9018  | 10063 | 9580  | 10979 | 14059 | 11021 | 10726 | 12897 | 8001  | 10766 | 10318   | Cask    |
| Caskin1 | 2625  | 3938  | 4637  | 5479  | 7027  |       |       |       |       |       |       |       |       |       |       |       |       |       |       |       |       |       |       |       |       |       |       |         |         |

|           |       |       |       |       |       |       |       |       |       |       |       |       |       |       |       |       |       |       |       |       |       |       |       |       |       |       |       |       |           |
|-----------|-------|-------|-------|-------|-------|-------|-------|-------|-------|-------|-------|-------|-------|-------|-------|-------|-------|-------|-------|-------|-------|-------|-------|-------|-------|-------|-------|-------|-----------|
| Catspere2 | 45    | 58    | 31    | 39    | 43    | 40    | 34    | 24    | 32    | 34    | 31    | 25    | 44    | 20    | 30    | 43    | 22    | 53    | 33    | 33    | 29    | 40    | 38    | 33    | 20    | 17    | 27    | 17    | Catspere2 |
| Catsperg1 | 531   | 534   | 484   | 691   | 830   | 793   | 653   | 374   | 353   | 484   | 443   | 300   | 293   | 308   | 555   | 657   | 626   | 747   | 675   | 724   | 742   | 555   | 304   | 305   | 509   | 196   | 293   | 241   | Catsperg1 |
| Catsperg2 | 14    | 13    | 6     | 21    | 28    | 47    | 19    | 22    | 27    | 29    | 29    | 41    | 37    | 35    | 29    | 15    | 16    | 25    | 25    | 45    | 50    | 90    | 46    | 22    | 71    | 16    | 22    | 32    | Catsperg2 |
| Catsperz  | 20    | 25    | 15    | 14    | 17    | 14    | 31    | 7     | 11    | 3     | 13    | 7     | 3     | 7     | 17    | 41    | 17    | 15    | 14    | 26    | 13    | 10    | 8     | 7     | 2     | 0     | 7     | 4     | Catsperz  |
| Cav1      | 829   | 572   | 583   | 641   | 929   | 975   | 894   | 1660  | 2380  | 1709  | 2727  | 1138  | 1276  | 1215  | 802   | 700   | 568   | 927   | 936   | 1186  | 886   | 1826  | 3839  | 1825  | 1711  | 1142  | 953   | 1161  | Cav1      |
| Cav2      | 337   | 225   | 314   | 285   | 394   | 405   | 420   | 606   | 669   | 511   | 724   | 482   | 600   | 533   | 372   | 336   | 330   | 339   | 360   | 431   | 375   | 460   | 909   | 611   | 547   | 552   | 437   | 538   | Cav2      |
| Cav3      | 6     | 3     | 0     | 0     | 1     | 0     | 0     | 10    | 19    | 15    | 173   | 0     | 11    | 0     | 4     | 2     | 1     | 2     | 0     | 0     | 0     | 15    | 133   | 7     | 3     | 0     | 0     | 2     | Cav3      |
| Cavin1    | 3481  | 3704  | 3570  | 2997  | 2356  | 3564  | 1581  | 3416  | 4747  | 4205  | 5644  | 3081  | 3928  | 3281  | 3658  | 4003  | 3071  | 4210  | 1963  | 1730  | 1810  | 3989  | 6468  | 4679  | 3667  | 3324  | 3819  | 3298  | Cavin1    |
| Cavin2    | 260   | 159   | 214   | 222   | 350   | 352   | 202   | 556   | 958   | 653   | 1623  | 439   | 598   | 372   | 293   | 267   | 240   | 305   | 238   | 300   | 214   | 725   | 1572  | 519   | 552   | 419   | 382   | 362   | Cavin2    |
| Cavin3    | 356   | 455   | 435   | 337   | 295   | 490   | 232   | 793   | 1020  | 803   | 949   | 775   | 881   | 797   | 355   | 403   | 292   | 386   | 276   | 289   | 232   | 690   | 1197  | 842   | 774   | 782   | 764   | 793   | Cavin3    |
| Cavin4    | 242   | 260   | 264   | 383   | 368   | 398   | 318   | 397   | 321   | 404   | 465   | 532   | 437   | 486   | 237   | 251   | 337   | 278   | 365   | 341   | 348   | 471   | 375   | 397   | 530   | 308   | 522   | 447   | Cavin4    |
| Cbap      | 3073  | 4238  | 3963  | 5596  | 6135  | 4913  | 4199  | 3032  | 3872  | 5012  | 4042  | 3754  | 3241  | 3193  | 3066  | 3544  | 5277  | 5735  | 5634  | 4216  | 4951  | 5798  | 3425  | 4185  | 4987  | 3484  | 2990  | 2872  | Cbap      |
| Cbfa212   | 8431  | 8102  | 7159  | 8424  | 8376  | 8482  | 8713  | 8054  | 7192  | 7183  | 6785  | 8692  | 8326  | 8617  | 8329  | 7633  | 8108  | 8349  | 8449  | 7995  | 8577  | 7646  | 6988  | 7825  | 8518  | 7341  | 8932  | 9070  | Cbfa212   |
| Cbfa213   | 735   | 863   | 1208  | 1697  | 3201  | 2059  | 1861  | 2560  | 3223  | 4998  | 4192  | 3884  | 3244  | 3672  | 873   | 810   | 1820  | 2023  | 2559  | 1563  | 2096  | 5249  | 2937  | 4090  | 4766  | 2770  | 2884  | 3205  | Cbfa213   |
| Cbfb      | 7350  | 4727  | 6220  | 5602  | 5906  | 5793  | 6459  | 8902  | 8319  | 7186  | 9156  | 7635  | 8868  | 8546  | 7023  | 6460  | 5976  | 6309  | 5721  | 5354  | 5855  | 8119  | 8337  | 8060  | 7116  | 10304 | 7548  | 9169  | Cbfb      |
| Cbl       | 13937 | 12606 | 9214  | 12623 | 13630 | 15202 | 14377 | 14510 | 13401 | 12803 | 12512 | 14104 | 13622 | 14329 | 13497 | 12455 | 10929 | 12455 | 12839 | 13489 | 15093 | 12352 | 12145 | 10874 | 14568 | 8911  | 14674 | 12709 | Cbl       |
| Cblb      | 4946  | 4491  | 6737  | 6727  | 6465  | 5819  | 6268  | 5434  | 5010  | 6435  | 6155  | 7619  | 8781  | 7349  | 5070  | 5474  | 6730  | 6185  | 6154  | 4837  | 5919  | 7439  | 5218  | 6655  | 6591  | 7037  | 7284  | 8146  | Cblb      |
| Cblc      | 53    | 14    | 11    | 5     | 6     | 6     | 0     | 29    | 51    | 34    | 29    | 2     | 8     | 10    | 22    | 25    | 1     | 9     | 7     | 1     | 0     | 2     | 50    | 21    | 1     | 24    | 6     | 4     | Cblc      |
| Cbl11     | 3509  | 2975  | 4154  | 4393  | 4260  | 4143  | 4159  | 3352  | 3222  | 3579  | 3394  | 3985  | 3751  | 4009  | 3526  | 3519  | 4342  | 4264  | 4101  | 3141  | 4362  | 4062  | 2976  | 3717  | 3947  | 3783  | 3860  | 4120  | Cbl11     |
| Cbl11     | 1719  | 2499  | 2574  | 2485  | 3165  | 2400  | 2254  | 2157  | 2277  | 2685  | 2113  | 1990  | 2743  | 1985  | 2474  | 2647  | 2525  | 2684  | 2286  | 2414  | 2317  | 2874  | 2349  | 1584  | 2159  | 2094  | 1772  | 2105  | Cbl11     |
| Cbln2     | 976   | 1073  | 1072  | 1273  | 1897  | 1697  | 1923  | 3412  | 2657  | 2826  | 2594  | 2055  | 2235  | 2281  | 1487  | 840   | 1347  | 1351  | 1827  | 1831  | 1724  | 3628  | 2955  | 2250  | 3169  | 1884  | 2034  | 1924  | Cbln2     |
| Cbln3     | 63    | 51    | 73    | 52    | 57    | 37    | 76    | 71    | 74    | 57    | 85    | 72    | 87    | 82    | 54    | 55    | 66    | 55    | 43    | 47    | 57    | 72    | 67    | 78    | 60    | 76    | 67    | 42    | Cbln3     |
| Cbln4     | 113   | 114   | 135   | 199   | 557   | 269   | 311   | 475   | 435   | 501   | 485   | 237   | 260   | 230   | 190   | 127   | 140   | 265   | 319   | 286   | 328   | 647   | 407   | 313   | 483   | 243   | 198   | 193   | Cbln4     |
| Cbr1      | 3462  | 3675  | 3176  | 3541  | 3661  | 3317  | 3499  | 3447  | 3330  | 3579  | 3250  | 3247  | 3326  | 3412  | 3600  | 3217  | 3759  | 3417  | 3709  | 3873  | 3417  | 3280  | 3524  | 3656  | 3546  | 3600  | 3403  | 3368  | Cbr1      |
| Cbr2      | 25    | 21    | 21    | 19    | 6     | 14    | 1     | 114   | 131   | 128   | 116   | 30    | 17    | 18    | 28    | 18    | 14    | 8     | 9     | 7     | 5     | 27    | 207   | 98    | 26    | 24    | 27    | 18    | Cbr2      |
| Cbr3      | 73    | 77    | 85    | 34    | 57    | 66    | 65    | 23    | 56    | 36    | 43    | 10    | 29    | 12    | 62    | 83    | 95    | 77    | 50    | 66    | 53    | 17    | 54    | 29    | 14    | 14    | 15    | 23    | Cbr3      |
| Cbr4      | 882   | 713   | 752   | 730   | 694   | 749   | 821   | 1241  | 1163  | 1047  | 1033  | 1382  | 1349  | 1473  | 887   | 650   | 737   | 585   | 635   | 865   | 702   | 1103  | 1224  | 1166  | 1098  | 1306  | 1397  | 1216  | Cbr4      |
| Cbs       | 959   | 1179  | 920   | 1602  | 1310  | 1196  | 1452  | 227   | 297   | 313   | 265   | 193   | 196   | 221   | 873   | 1008  | 972   | 1552  | 1428  | 1360  | 1401  | 182   | 285   | 314   | 343   | 206   | 166   | 188   | Cbs       |
| Cbwd1     | 2337  | 2261  | 2718  | 2342  | 2007  | 1930  | 2242  | 1561  | 1277  | 1198  | 1215  | 1550  | 1469  | 1495  | 2546  | 2336  | 2381  | 2161  | 2051  | 2502  | 2112  | 1218  | 1309  | 1476  | 1327  | 1644  | 1599  | 1600  | Cbwd1     |
| Cbx1      | 24267 | 19925 | 31416 | 24772 | 19136 | 18713 | 23253 | 22252 | 18166 | 21820 | 20437 | 25296 | 23661 | 31207 | 22759 | 19972 | 27148 | 21308 | 21707 | 22207 | 22305 | 18989 | 17387 | 26934 | 22675 | 31953 | 27923 | 32155 | Cbx1      |
| Cbx2      | 5969  | 7032  | 8209  | 6607  | 4933  | 5426  | 5014  | 4564  | 4863  | 5130  | 4683  | 7491  | 6399  | 6491  | 5163  | 6798  | 5781  | 6092  | 5944  | 4595  | 5126  | 4553  | 4322  | 6397  | 5246  | 9454  | 6876  | 7244  | Cbx2      |
| Cbx3      | 11262 | 8921  | 13899 | 11312 | 11365 | 11343 | 13238 | 18221 | 15522 | 16113 | 15416 | 20398 | 17736 | 22395 | 11628 | 9837  | 12747 | 10991 | 12204 | 14296 | 12591 | 14551 | 15262 | 19998 | 18717 | 24004 | 21611 | 23099 | Cbx3      |
| Cbx4      | 1902  | 2248  | 2180  | 2553  | 2173  | 2086  | 1977  | 1441  | 1546  | 1854  | 1576  | 1653  | 1354  | 1381  | 1734  | 1997  | 2420  | 2479  | 2187  | 1763  | 2153  | 1668  | 1451  | 1831  | 1772  | 1619  | 1424  | 1355  | Cbx4      |
| Cbx5      | 44010 | 36234 | 35705 | 34661 | 35249 | 37874 | 39026 | 59348 | 49479 | 45998 | 45675 | 57731 | 50574 | 58458 | 42072 | 33619 | 35829 | 33355 | 36359 | 40104 | 38459 | 46500 | 47750 | 46610 | 51860 | 49862 | 62277 | 58955 | Cbx5      |
| Cbx6      | 7116  | 8909  | 11517 | 11891 | 11981 | 10962 | 10299 | 8695  | 9101  | 12256 | 12412 | 11906 | 10494 | 12034 | 6674  | 7476  | 12422 | 12389 | 12725 | 8592  | 11241 | 12039 | 9982  | 12621 | 12857 | 9515  | 10775 | 11763 | Cbx6      |
| Cbx7      | 2480  | 3090  | 3565  | 3564  | 2860  | 3106  | 2870  | 501   | 620   | 640   | 572   | 693   | 679   | 659   | 2273  | 2591  | 3775  | 3565  | 3307  | 2500  | 2891  | 612   | 592   | 662   | 675   | 630   | 595   | 666   | Cbx7      |
| Cbx8      | 1639  | 2380  | 2631  | 2896  | 1816  | 1959  | 1788  | 1232  | 1308  | 1574  | 1349  | 1667  | 1483  | 1521  | 1617  | 2068  | 2911  | 2642  | 2208  | 1837  | 1900  | 1491  | 1218  | 1749  | 1731  | 1671  | 1601  | 1450  | Cbx8      |
| Cby1      | 2600  | 3380  | 3442  | 3416  | 2872  | 2864  | 3057  | 2318  | 2341  | 2666  | 2120  | 2717  | 2277  | 2817  | 2798  | 2509  | 3390  | 3199  | 3291  | 3307  | 3335  | 2044  | 2375  | 2876  | 2696  | 3308  | 2725  | 2870  | Cby1      |
| Cby2      | 0     | 0     | 0     | 0     | 0     | 0     | 0     | 0     | 0     | 0     | 0     | 0     | 0     | 0     | 0     | 0     | 0     | 0     | 0     | 0     | 0     | 0     | 0     | 0     | 0     | 0     | 0     | 0     | Cby2      |
| Cby3      | 0     | 3     | 3     | 0     | 1     | 3     | 7     | 1     | 2     | 5     | 4     | 5     | 0     | 4     | 1     | 1     | 1     | 0     | 9     | 0     | 1     | 2     | 2     | 7     | 1     | 3     | 0     | 0     | Cby3      |
| Cc2d1a    | 1130  | 1457  | 1560  | 1873  | 2194  | 1850  | 1581  | 1800  | 2488  | 2795  | 2605  | 2311  | 2182  | 1942  | 1015  | 1453  | 1763  | 1931  | 2260  | 1482  | 1835  | 2647  | 2313  | 2690  | 2698  | 2536  | 1947  | 2040  | Cc2d1a    |
| Cc2d1b    | 2398  | 2588  | 2567  | 2928  | 2823  | 2583  | 2594  | 2977  | 3849  | 3990  | 3892  | 3974  | 3809  | 3811  | 2422  | 2423  | 2863  | 2799  | 2828  | 2566  | 2607  | 3559  | 3464  | 3921  | 3860  | 3944  | 3847  | 3526  | Cc2d1b    |
| Cc2d2a    | 1007  | 985   | 898   | 836   | 1078  | 1033  | 948   | 2319  | 2374  | 2190  | 2395  | 2467  | 2496  | 2493  | 1022  | 935   | 912   | 840   | 925   | 1107  | 949   | 2025  | 2434  | 2112  | 2044  | 1900  | 2778  | 2409  | Cc2d2a    |
| Cc2d2b    | 18    | 17    | 18    | 11    | 14    | 24    | 22    | 319   | 222   | 31    | 23    | 21    | 11    | 17    | 18    | 14    | 14    | 25    | 26    | 25    | 21    | 15    | 36    | 23    | 44    | 18    | 16    | 26    | Cc2d2b    |
| Ccar1     | 14534 | 11104 | 14240 | 12561 | 13191 | 14329 | 14460 | 24277 | 18322 | 19616 | 18275 | 22499 | 20889 | 24640 | 14249 | 12116 | 13216 | 11853 | 14412 | 15657 | 13809 | 20397 | 17831 | 21809 | 21604 | 23411 | 23424 | 24301 | Ccar1     |
| Ccar2     | 9878  | 10984 | 12672 | 12444 | 11143 | 11197 | 11153 | 11339 | 12307 | 13753 | 12291 | 16011 | 14020 | 15088 | 9082  | 9628  | 12843 | 11482 | 12684 | 10564 | 11659 | 13293 | 11235 | 14954 | 15102 | 16184 | 15271 | 15578 | Ccar2     |
| Ccbe1     | 728   | 673   | 849   | 417   | 209   | 437   | 137   | 430   | 363   | 477   | 502   | 829   | 1109  | 810   | 645   | 1040  | 557   | 427   | 115   | 131   | 130   | 456   | 550   | 497   | 486   | 543   | 1027  | 987   | Ccbe1     |
| Ccdc102a  | 413   | 459   | 550   | 418   | 361   | 452   | 288   | 879   | 1261  | 1169  | 1526  | 1033  | 1287  | 983   | 327   | 565   | 516   | 424   | 388   | 287   | 265   | 934   | 1420  | 1289  | 939   | 582   | 1127  | 1076  | Ccdc102a  |
| Ccdc103   | 212   | 278   | 225   | 173   | 169   | 220   | 163   | 90    | 91    | 104   | 81    |       |       |       |       |       |       |       |       |       |       |       |       |       |       |       |       |       |           |

|         |      |      |      |      |      |      |      |      |      |      |      |      |      |      |      |      |      |      |      |      |      |      |      |      |      |      |      |      |         |
|---------|------|------|------|------|------|------|------|------|------|------|------|------|------|------|------|------|------|------|------|------|------|------|------|------|------|------|------|------|---------|
| Ccdc15  | 609  | 474  | 282  | 440  | 415  | 460  | 470  | 652  | 588  | 522  | 522  | 529  | 549  | 550  | 556  | 504  | 395  | 359  | 370  | 530  | 462  | 471  | 583  | 395  | 498  | 335  | 673  | 553  | Ccdc15  |
| Ccdc150 | 77   | 86   | 129  | 75   | 56   | 107  | 74   | 101  | 79   | 71   | 110  | 159  | 136  | 151  | 109  | 108  | 98   | 62   | 47   | 56   | 52   | 74   | 91   | 102  | 94   | 122  | 160  | 154  | Ccdc150 |
| Ccdc152 | 1    | 1    | 0    | 1    | 4    | 2    | 0    | 0    | 0    | 1    | 1    | 1    | 0    | 2    | 1    | 1    | 5    | 2    | 0    | 1    | 0    | 12   | 1    | 1    | 0    | 0    | 5    | 0    | Ccdc152 |
| Ccdc153 | 1    | 5    | 0    | 8    | 7    | 0    | 0    | 4    | 1    | 0    | 8    | 1    | 1    | 2    | 4    | 2    | 0    | 3    | 1    | 10   | 0    | 0    | 1    | 0    | 2    | 3    | 2    | 1    | Ccdc153 |
| Ccdc154 | 22   | 31   | 24   | 22   | 3    | 12   | 21   | 1    | 7    | 6    | 6    | 0    | 5    | 9    | 21   | 14   | 7    | 34   | 22   | 10   | 14   | 10   | 5    | 9    | 3    | 4    | 6    | 4    | Ccdc154 |
| Ccdc157 | 2396 | 2618 | 2436 | 2469 | 2582 | 2440 | 2111 | 2121 | 2185 | 2416 | 2870 | 2292 | 2420 | 2072 | 2256 | 2477 | 2501 | 2357 | 2445 | 2117 | 2171 | 2483 | 2368 | 2293 | 2146 | 1951 | 2101 | 2106 | Ccdc157 |
| Ccdc158 | 865  | 798  | 777  | 722  | 558  | 667  | 687  | 217  | 198  | 201  | 193  | 185  | 147  | 160  | 854  | 861  | 588  | 741  | 537  | 701  | 625  | 159  | 210  | 198  | 117  | 156  | 185  | 208  | Ccdc158 |
| Ccdc159 | 338  | 437  | 363  | 612  | 648  | 678  | 521  | 536  | 531  | 606  | 696  | 559  | 560  | 536  | 396  | 407  | 531  | 584  | 584  | 533  | 546  | 782  | 514  | 599  | 656  | 362  | 573  | 504  | Ccdc159 |
| Ccdc160 | 311  | 355  | 386  | 330  | 367  | 274  | 363  | 183  | 160  | 199  | 167  | 215  | 218  | 213  | 436  | 389  | 346  | 300  | 287  | 443  | 343  | 264  | 179  | 172  | 156  | 203  | 229  | 211  | Ccdc160 |
| Ccdc162 | 119  | 156  | 128  | 137  | 169  | 174  | 141  | 118  | 222  | 153  | 195  | 131  | 221  | 115  | 158  | 211  | 100  | 134  | 179  | 217  | 162  | 196  | 320  | 114  | 114  | 118  | 174  | 107  | Ccdc162 |
| Ccdc163 | 1459 | 1580 | 1662 | 1516 | 1067 | 1174 | 1435 | 1269 | 1114 | 1265 | 1179 | 1561 | 1406 | 1750 | 1298 | 1261 | 1618 | 1307 | 1277 | 1288 | 1326 | 1135 | 1043 | 1545 | 1346 | 1676 | 1619 | 1746 | Ccdc163 |
| Ccdc166 | 367  | 392  | 379  | 443  | 452  | 451  | 441  | 502  | 559  | 664  | 542  | 559  | 500  | 474  | 394  | 313  | 423  | 383  | 515  | 409  | 466  | 592  | 537  | 538  | 557  | 596  | 471  | 506  | Ccdc166 |
| Ccdc167 | 1145 | 1116 | 1004 | 1190 | 1312 | 1359 | 1506 | 2150 | 2227 | 2214 | 2108 | 2356 | 2013 | 2480 | 1155 | 861  | 1107 | 1264 | 1305 | 1345 | 1496 | 1955 | 2017 | 2357 | 2280 | 1936 | 2239 | 2416 | Ccdc167 |
| Ccdc169 | 36   | 30   | 28   | 54   | 44   | 48   | 49   | 38   | 17   | 24   | 32   | 15   | 10   | 15   | 44   | 46   | 54   | 54   | 62   | 41   | 46   | 55   | 17   | 29   | 26   | 23   | 12   | 19   | Ccdc169 |
| Ccdc170 | 145  | 171  | 159  | 167  | 135  | 179  | 160  | 165  | 161  | 132  | 182  | 167  | 187  | 167  | 179  | 161  | 154  | 171  | 141  | 142  | 165  | 187  | 161  | 141  | 161  | 177  | 148  | 150  | Ccdc170 |
| Ccdc170 | 52   | 62   | 50   | 80   | 121  | 89   | 75   | 76   | 103  | 120  | 75   | 124  | 90   | 44   | 73   | 121  | 81   | 96   | 93   | 87   | 97   | 100  | 155  | 43   | 56   | 35   | 37   | 38   | Ccdc170 |
| Ccdc171 | 1370 | 1301 | 834  | 1327 | 1178 | 1216 | 1422 | 876  | 810  | 812  | 614  | 694  | 636  | 698  | 1349 | 1255 | 1194 | 1096 | 1149 | 1411 | 1304 | 645  | 826  | 713  | 667  | 524  | 740  | 503  | Ccdc171 |
| Ccdc172 | 1    | 0    | 0    | 0    | 0    | 0    | 0    | 0    | 0    | 0    | 0    | 0    | 0    | 0    | 0    | 0    | 0    | 0    | 0    | 0    | 1    | 2    | 1    | 0    | 1    | 0    | 0    | 2    | Ccdc172 |
| Ccdc173 | 739  | 717  | 1004 | 924  | 663  | 764  | 837  | 587  | 490  | 561  | 539  | 634  | 626  | 784  | 853  | 759  | 1000 | 801  | 701  | 845  | 768  | 622  | 532  | 674  | 558  | 543  | 636  | 717  | Ccdc173 |
| Ccdc174 | 2461 | 2342 | 2570 | 2582 | 2391 | 2442 | 2760 | 3108 | 2636 | 2796 | 2522 | 3385 | 2854 | 3385 | 2512 | 2326 | 2459 | 2448 | 2448 | 2867 | 2495 | 2729 | 2709 | 3167 | 3135 | 3370 | 3387 | 3355 | Ccdc174 |
| Ccdc175 | 10   | 10   | 12   | 13   | 6    | 12   | 22   | 4    | 4    | 6    | 9    | 10   | 11   | 12   | 20   | 6    | 5    | 17   | 9    | 9    | 22   | 3    | 3    | 11   | 5    | 9    | 15   | 6    | Ccdc175 |
| Ccdc177 | 1262 | 1203 | 1650 | 1715 | 2401 | 2004 | 2273 | 2691 | 2516 | 3610 | 2596 | 3894 | 2826 | 3971 | 1394 | 981  | 1866 | 1735 | 2590 | 1940 | 2247 | 3424 | 2181 | 3731 | 3825 | 3363 | 3527 | 3652 | Ccdc177 |
| Ccdc178 | 2    | 6    | 4    | 0    | 4    | 0    | 1    | 1    | 10   | 0    | 5    | 2    | 7    | 1    | 11   | 6    | 1    | 2    | 5    | 4    | 2    | 0    | 6    | 4    | 3    | 4    | 1    | 1    | Ccdc178 |
| Ccdc18  | 2343 | 1493 | 1518 | 1655 | 1129 | 1537 | 1734 | 1237 | 1176 | 1009 | 934  | 1382 | 1195 | 1439 | 1995 | 1965 | 1582 | 1402 | 1407 | 1927 | 1543 | 620  | 1001 | 1052 | 844  | 1057 | 1490 | 1214 | Ccdc18  |
| Ccdc180 | 98   | 153  | 43   | 70   | 132  | 121  | 116  | 82   | 107  | 93   | 59   | 76   | 108  | 21   | 86   | 170  | 79   | 90   | 116  | 108  | 113  | 85   | 148  | 47   | 65   | 59   | 42   | 37   | Ccdc180 |
| Ccdc181 | 1002 | 991  | 1060 | 1108 | 1073 | 1110 | 1193 | 1547 | 1344 | 1350 | 1215 | 1308 | 1339 | 1505 | 1046 | 1021 | 1001 | 1017 | 1057 | 1154 | 1053 | 1405 | 1418 | 1340 | 1486 | 1321 | 1453 | 1434 | Ccdc181 |
| Ccdc182 | 0    | 2    | 5    | 0    | 0    | 0    | 0    | 2    | 1    | 0    | 1    | 1    | 0    | 0    | 0    | 0    | 0    | 0    | 0    | 0    | 0    | 0    | 1    | 1    | 0    | 0    | 2    | 0    | Ccdc182 |
| Ccdc183 | 0    | 4    | 10   | 5    | 2    | 2    | 3    | 6    | 3    | 0    | 3    | 2    | 0    | 0    | 7    | 3    | 1    | 7    | 14   | 0    | 0    | 0    | 7    | 0    | 0    | 0    | 0    | 2    | Ccdc183 |
| Ccdc184 | 1441 | 2247 | 1699 | 2906 | 3278 | 2728 | 2914 | 1399 | 1422 | 1806 | 1443 | 1166 | 1076 | 1206 | 1756 | 1502 | 2671 | 2896 | 3236 | 2865 | 3201 | 2152 | 1385 | 1543 | 1849 | 1095 | 1019 | 1200 | Ccdc184 |
| Ccdc185 | 0    | 0    | 0    | 0    | 0    | 0    | 0    | 0    | 0    | 0    | 0    | 0    | 0    | 0    | 0    | 0    | 0    | 0    | 0    | 0    | 0    | 0    | 0    | 0    | 0    | 4    | 0    | 0    | Ccdc185 |
| Ccdc186 | 7947 | 7414 | 5386 | 7634 | 7298 | 7651 | 7894 | 6646 | 5687 | 5240 | 5487 | 4888 | 5117 | 5067 | 8219 | 7464 | 6215 | 7655 | 6674 | 8623 | 7967 | 5452 | 5567 | 4788 | 5745 | 3259 | 5125 | 4472 | Ccdc186 |
| Ccdc187 | 226  | 249  | 88   | 329  | 416  | 432  | 318  | 800  | 690  | 877  | 691  | 777  | 902  | 721  | 225  | 334  | 196  | 275  | 330  | 396  | 331  | 680  | 896  | 955  | 683  | 650  | 644  | 602  | Ccdc187 |
| Ccdc189 | 664  | 777  | 643  | 669  | 626  | 569  | 702  | 348  | 400  | 374  | 355  | 403  | 466  | 435  | 785  | 742  | 629  | 683  | 620  | 735  | 676  | 343  | 414  | 365  | 419  | 450  | 442  | 433  | Ccdc189 |
| Ccdc190 | 47   | 58   | 65   | 86   | 117  | 78   | 56   | 217  | 207  | 281  | 199  | 127  | 177  | 168  | 73   | 44   | 72   | 47   | 68   | 68   | 116  | 297  | 280  | 187  | 244  | 203  | 188  | 167  | Ccdc190 |
| Ccdc191 | 558  | 477  | 613  | 488  | 482  | 448  | 525  | 1222 | 1173 | 1200 | 1089 | 1247 | 1252 | 1285 | 520  | 486  | 579  | 410  | 457  | 517  | 482  | 896  | 1098 | 1133 | 1177 | 1309 | 1361 | 1375 | Ccdc191 |
| Ccdc192 | 0    | 3    | 0    | 0    | 1    | 6    | 0    | 0    | 1    | 0    | 4    | 0    | 0    | 1    | 4    | 0    | 0    | 0    | 0    | 12   | 1    | 2    | 4    | 2    | 5    | 3    | 0    | 0    | Ccdc192 |
| Ccdc194 | 5    | 10   | 8    | 7    | 10   | 9    | 3    | 13   | 25   | 31   | 19   | 12   | 23   | 16   | 7    | 6    | 7    | 1    | 2    | 4    | 3    | 12   | 21   | 10   | 6    | 17   | 3    | 13   | Ccdc194 |
| Ccdc198 | 2    | 1    | 1    | 0    | 3    | 3    | 2    | 1    | 5    | 10   | 6    | 7    | 0    | 0    | 1    | 1    | 2    | 0    | 1    | 5    | 0    | 5    | 10   | 4    | 9    | 2    | 9    | 4    | Ccdc198 |
| Ccdc201 | 2    | 0    | 0    | 0    | 0    | 0    | 0    | 0    | 0    | 0    | 0    | 0    | 0    | 0    | 0    | 0    | 0    | 0    | 0    | 0    | 0    | 2    | 1    | 0    | 0    | 0    | 0    | 4    | Ccdc201 |
| Ccdc22  | 15   | 19   | 19   | 28   | 22   | 18   | 19   | 34   | 13   | 26   | 19   | 15   | 22   | 38   | 25   | 7    | 22   | 11   | 16   | 21   | 38   | 27   | 10   | 33   | 20   | 14   | 26   | 19   | Ccdc22  |
| Ccdc24  | 54   | 85   | 115  | 137  | 169  | 121  | 145  | 116  | 86   | 112  | 105  | 150  | 141  | 148  | 67   | 75   | 136  | 180  | 139  | 97   | 142  | 159  | 78   | 150  | 174  | 122  | 89   | 127  | Ccdc24  |
| Ccdc25  | 4760 | 4362 | 5575 | 4697 | 3931 | 4276 | 4542 | 3118 | 2899 | 3029 | 2856 | 3836 | 3339 | 3888 | 4781 | 4341 | 4748 | 4416 | 4313 | 4418 | 4265 | 3312 | 2876 | 3568 | 3478 | 4272 | 3799 | 3987 | Ccdc25  |
| Ccdc27  | 0    | 2    | 5    | 0    | 2    | 0    | 3    | 0    | 1    | 3    | 4    | 3    | 0    | 0    | 0    | 0    | 0    | 0    | 3    | 2    | 0    | 0    | 4    | 2    | 0    | 4    | 0    | 0    | Ccdc27  |
| Ccdc28a | 873  | 932  | 760  | 912  | 673  | 644  | 753  | 397  | 397  | 374  | 386  | 283  | 418  | 309  | 847  | 1025 | 710  | 801  | 643  | 798  | 729  | 351  | 370  | 373  | 378  | 338  | 331  | 312  | Ccdc28a |
| Ccdc28b | 2152 | 2449 | 2441 | 2622 | 2639 | 2473 | 2504 | 1810 | 1893 | 1949 | 1796 | 1987 | 1835 | 1903 | 2230 | 2228 | 2608 | 2555 | 2662 | 2859 | 2583 | 1945 | 1866 | 2062 | 2131 | 1859 | 2059 | 1844 | Ccdc28b |
| Ccdc3   | 421  | 556  | 619  | 519  | 620  | 596  | 360  | 1044 | 1118 | 1123 | 937  | 622  | 1093 | 620  | 873  | 700  | 523  | 647  | 455  | 519  | 383  | 964  | 1484 | 842  | 782  | 495  | 668  | 587  | Ccdc3   |
| Ccdc30  | 1395 | 1548 | 1252 | 1687 | 1694 | 1708 | 1776 | 1064 | 936  | 1066 | 843  | 989  | 976  | 1000 | 1534 | 1292 | 1596 | 1684 | 1626 | 1759 | 1867 | 1226 | 908  | 909  | 997  | 830  | 1011 | 980  | Ccdc30  |
| Ccdc32  | 2551 | 3167 | 2857 | 2902 | 2498 | 2500 | 2937 | 1406 | 1392 | 1463 | 1318 | 1480 | 1929 | 1487 | 2859 | 2768 | 2787 | 2945 | 2699 | 2973 | 2937 | 1379 | 1383 | 1473 | 1508 | 1503 | 1411 | 1388 | Ccdc32  |
| Ccdc33  | 59   | 64   | 68   | 65   | 65   | 89   | 68   | 72   | 112  | 68   | 52   | 131  | 87   | 93   | 58   | 54   | 74   | 62   | 38   | 65   | 67   | 79   | 72   | 78   | 72   | 81   | 72   | 75   | Ccdc33  |
| Ccdc34  | 5165 | 4572 | 6291 | 4658 | 3696 | 3767 | 4417 | 5569 | 4458 | 5253 | 4205 | 5976 | 5306 | 6465 | 5418 | 4667 | 5762 | 3710 | 4317 | 4983 | 4278 | 4288 | 4499 | 5936 | 5007 | 6627 | 6294 | 7104 | Ccdc34  |
| Ccdc38  | 5    | 7    | 6    | 16   | 3    | 14   | 3    | 39   | 26   | 46   | 15   | 14   | 34   | 21   | 11   | 12   | 23   | 3    | 7    | 7    | 8    | 33   | 39   | 25   | 31   | 16   | 19   | 30   | Ccdc38  |
| Ccdc39  | 2204 | 2029 | 1932 | 2015 | 2157 | 2455 | 2402 | 1987 | 1749 | 1727 | 1731 | 1683 | 1929 | 1728 | 2540 | 2326 | 1920 | 2012 | 2131 | 2591 | 2552 | 2137 | 2034 | 1414 | 1739 | 1061 | 1617 | 1421 | Ccdc39  |
| Ccdc40  | 1232 |      |      |      |      |      |      |      |      |      |      |      |      |      |      |      |      |      |      |      |      |      |      |      |      |      |      |      |         |



|         |       |       |       |       |       |       |       |       |       |        |       |       |       |       |       |       |       |       |       |       |       |       |       |       |       |       |       |        |         |
|---------|-------|-------|-------|-------|-------|-------|-------|-------|-------|--------|-------|-------|-------|-------|-------|-------|-------|-------|-------|-------|-------|-------|-------|-------|-------|-------|-------|--------|---------|
| Ccdc80  | 1284  | 1317  | 1649  | 661   | 417   | 875   | 255   | 1248  | 1832  | 1570   | 2609  | 1290  | 1914  | 1337  | 1497  | 1810  | 917   | 784   | 320   | 367   | 293   | 1375  | 2935  | 1472  | 1115  | 1359  | 1825  | 1496   | Ccdc80  |
| Ccdc81  | 100   | 111   | 97    | 170   | 157   | 137   | 166   | 93    | 74    | 94     | 78    | 84    | 82    | 43    | 84    | 119   | 131   | 211   | 164   | 140   | 156   | 112   | 89    | 57    | 61    | 25    | 56    | 38     | Ccdc81  |
| Ccdc82  | 5574  | 4887  | 4842  | 6111  | 5757  | 6228  | 6206  | 3692  | 3170  | 2831   | 3048  | 3294  | 3098  | 3303  | 5939  | 5576  | 4968  | 5789  | 5294  | 5954  | 6169  | 3380  | 2993  | 2669  | 3260  | 2464  | 3269  | 3082   | Ccdc82  |
| Ccdc83  | 5     | 3     | 0     | 1     | 1     | 1     | 0     | 2     | 1     | 3      | 8     | 1     | 0     | 2     | 0     | 2     | 0     | 4     | 1     | 0     | 3     | 3     | 2     | 0     | 0     | 1     | 1     | Ccdc83 |         |
| Ccdc84  | 2151  | 2369  | 2121  | 2482  | 2034  | 1935  | 2221  | 1324  | 1191  | 1216   | 1208  | 1191  | 1178  | 1387  | 2219  | 2110  | 2080  | 2395  | 2027  | 2015  | 2199  | 1375  | 1044  | 1224  | 1188  | 1264  | 1269  | 1224   | Ccdc84  |
| Ccdc85a | 264   | 268   | 266   | 430   | 831   | 527   | 579   | 1025  | 1069  | 1050   | 1161  | 714   | 992   | 815   | 309   | 315   | 364   | 485   | 542   | 514   | 574   | 1507  | 1018  | 762   | 1130  | 658   | 732   | 634    | Ccdc85a |
| Ccdc85b | 1893  | 2255  | 2244  | 2516  | 2384  | 2313  | 2088  | 1239  | 1197  | 1452   | 1421  | 1412  | 1391  | 1318  | 1859  | 1771  | 2484  | 2388  | 2563  | 2285  | 2247  | 1440  | 1293  | 1493  | 1532  | 1506  | 1453  | 1275   | Ccdc85b |
| Ccdc85c | 8105  | 11606 | 12905 | 13993 | 11079 | 10397 | 10832 | 4295  | 4576  | 6118   | 5029  | 7729  | 6419  | 7393  | 8087  | 8859  | 13520 | 12532 | 12595 | 9641  | 11877 | 5733  | 4446  | 7141  | 6725  | 7895  | 6707  | 7517   | Ccdc85c |
| Ccdc86  | 1446  | 1587  | 1627  | 1541  | 1091  | 1158  | 1105  | 918   | 1008  | 986    | 1129  | 1185  | 1168  | 1252  | 1354  | 1782  | 1467  | 1427  | 1228  | 995   | 1095  | 971   | 1029  | 1258  | 946   | 1465  | 1051  | 1200   | Ccdc86  |
| Ccdc87  | 116   | 124   | 54    | 119   | 84    | 68    | 88    | 28    | 40    | 21     | 35    | 18    | 42    | 27    | 132   | 121   | 104   | 98    | 58    | 77    | 85    | 37    | 53    | 30    | 22    | 33    | 23    | 28     | Ccdc87  |
| Ccdc88a | 19947 | 14076 | 10392 | 16274 | 19241 | 23213 | 22822 | 24342 | 20436 | 17007  | 16671 | 17931 | 16056 | 18183 | 21129 | 16179 | 13151 | 15978 | 18122 | 23351 | 22868 | 17584 | 18274 | 14686 | 18664 | 11520 | 19000 | 16306  | Ccdc88a |
| Ccdc88b | 80    | 114   | 136   | 94    | 107   | 84    | 36    | 61    | 82    | 96     | 121   | 113   | 90    | 72    | 98    | 152   | 125   | 89    | 58    | 39    | 53    | 70    | 123   | 129   | 83    | 79    | 110   | 107    | Ccdc88b |
| Ccdc88c | 6463  | 7916  | 6987  | 10017 | 11470 | 10641 | 11149 | 6892  | 7177  | 8622   | 6862  | 10256 | 8089  | 9982  | 6936  | 6312  | 9525  | 10128 | 12094 | 10094 | 11415 | 7364  | 6144  | 9820  | 10055 | 6900  | 8613  | 9265   | Ccdc88c |
| Ccdc89  | 454   | 478   | 504   | 377   | 370   | 398   | 389   | 171   | 166   | 155    | 131   | 226   | 259   | 203   | 618   | 543   | 452   | 439   | 358   | 500   | 357   | 164   | 206   | 184   | 181   | 219   | 218   | 216    | Ccdc89  |
| Ccdc9   | 2616  | 3194  | 4176  | 4050  | 3058  | 3127  | 2882  | 2916  | 3423  | 4599   | 4290  | 4664  | 4344  | 4564  | 2421  | 2669  | 4108  | 3597  | 3509  | 2636  | 2985  | 3845  | 3339  | 4899  | 4620  | 5043  | 4365  | 4524   | Ccdc9   |
| Ccdc90b | 1975  | 1786  | 2350  | 1867  | 1718  | 1668  | 2045  | 2674  | 2603  | 2318   | 2510  | 2757  | 2855  | 3025  | 2159  | 1898  | 2035  | 1681  | 1831  | 2316  | 1822  | 2520  | 2742  | 2678  | 2541  | 2987  | 2972  | 3144   | Ccdc90b |
| Ccdc91  | 1380  | 1456  | 1209  | 1179  | 1285  | 1278  | 1238  | 2811  | 2769  | 2579   | 2381  | 2386  | 2335  | 2320  | 1462  | 1206  | 1301  | 1224  | 1288  | 1451  | 1368  | 2384  | 2727  | 2430  | 2248  | 2243  | 2474  | 2442   | Ccdc91  |
| Ccdc92  | 1077  | 1520  | 1454  | 1847  | 1843  | 1354  | 1516  | 692   | 906   | 1037   | 967   | 943   | 869   | 796   | 1047  | 1195  | 1892  | 1802  | 1801  | 1367  | 1658  | 1140  | 824   | 970   | 1150  | 915   | 657   | 805    | Ccdc92  |
| Ccdc92b | 422   | 549   | 423   | 712   | 819   | 628   | 730   | 416   | 424   | 524    | 445   | 466   | 706   | 528   | 455   | 418   | 743   | 791   | 795   | 529   | 687   | 637   | 390   | 489   | 535   | 501   | 407   | 777    | Ccdc92b |
| Ccdc93  | 6489  | 6369  | 4849  | 6010  | 6403  | 6657  | 5845  | 4653  | 4587  | 4344   | 4745  | 4013  | 4124  | 3842  | 6414  | 6539  | 5394  | 6217  | 5925  | 6301  | 6244  | 4114  | 4575  | 3974  | 4328  | 2588  | 3956  | 3863   | Ccdc93  |
| Ccdc96  | 1166  | 1454  | 1340  | 1439  | 1180  | 1193  | 1344  | 492   | 459   | 528    | 388   | 659   | 661   | 673   | 1224  | 995   | 1393  | 1269  | 1287  | 1345  | 1268  | 451   | 464   | 579   | 516   | 670   | 625   | 587    | Ccdc96  |
| Ccdc97  | 3073  | 3974  | 4517  | 4303  | 4076  | 3706  | 3505  | 3038  | 3606  | 4252   | 3963  | 4795  | 3962  | 4401  | 2893  | 3455  | 4612  | 4146  | 4377  | 3116  | 3700  | 4328  | 3309  | 4772  | 4401  | 4799  | 3901  | 4277   | Ccdc97  |
| Ccdc9b  | 218   | 186   | 214   | 159   | 247   | 268   | 289   | 565   | 583   | 677    | 559   | 810   | 721   | 900   | 215   | 138   | 199   | 161   | 302   | 254   | 241   | 744   | 455   | 778   | 702   | 853   | 891   | 870    | Ccdc9b  |
| Ccer1   | 2     | 2     | 5     | 1     | 0     | 0     | 0     | 0     | 3     | 0      | 0     | 0     | 0     | 0     | 0     | 0     | 0     | 0     | 0     | 0     | 3     | 0     | 1     | 0     | 0     | 3     | 0     | 2      | Ccer1   |
| Ccer2   | 20    | 54    | 7     | 7     | 54    | 5     | 4     | 89    | 100   | 74     | 68    | 5     | 108   | 7     | 63    | 80    | 45    | 25    | 2     | 2     | 3     | 85    | 35    | 2     | 48    | 4     | 12    | 2      | Ccer2   |
| Cchcr1  | 2580  | 3086  | 3865  | 3421  | 2683  | 2854  | 2658  | 1418  | 1846  | 1844   | 1995  | 2392  | 2259  | 2265  | 2329  | 3026  | 3494  | 3305  | 3310  | 2476  | 2641  | 1462  | 1732  | 2310  | 1869  | 2537  | 2437  | 2271   | Cchcr1  |
| Ccin    | 42    | 40    | 29    | 49    | 43    | 37    | 23    | 16    | 24    | 13     | 26    | 12    | 26    | 13    | 44    | 52    | 45    | 47    | 42    | 44    | 31    | 15    | 21    | 16    | 23    | 8     | 33    | 9      | Ccin    |
| Cck     | 72    | 94    | 67    | 84    | 123   | 123   | 182   | 133   | 149   | 97     | 102   | 139   | 34    | 175   | 69    | 72    | 109   | 110   | 160   | 221   | 185   | 177   | 151   | 181   | 130   | 126   | 102   | 127    | Cck     |
| Cckar   | 106   | 130   | 120   | 120   | 173   | 170   | 194   | 198   | 182   | 144    | 149   | 201   | 239   | 199   | 167   | 125   | 100   | 157   | 146   | 211   | 188   | 140   | 179   | 199   | 165   | 229   | 164   | 172    | Cckar   |
| Cckbr   | 32    | 19    | 27    | 28    | 58    | 27    | 27    | 22    | 49    | 38     | 33    | 18    | 22    | 10    | 16    | 16    | 19    | 35    | 32    | 28    | 22    | 35    | 30    | 39    | 30    | 51    | 15    | 19     | Cckbr   |
| Ccl1    | 0     | 0     | 0     | 1     | 0     | 0     | 0     | 0     | 2     | 2      | 0     | 0     | 1     | 2     | 4     | 0     | 0     | 1     | 0     | 1     | 2     | 2     | 0     | 0     | 0     | 0     | 0     | 5      | Ccl1    |
| Ccl11   | 0     | 0     | 0     | 0     | 7     | 3     | 0     | 4     | 16    | 16     | 99    | 0     | 0     | 0     | 1     | 0     | 0     | 3     | 0     | 0     | 0     | 30    | 97    | 11    | 2     | 0     | 0     | 0      | Ccl11   |
| Ccl12   | 2     | 3     | 0     | 4     | 3     | 0     | 4     | 16    | 26    | 22     | 24    | 17    | 16    | 26    | 1     | 2     | 1     | 2     | 2     | 3     | 1     | 12    | 25    | 16    | 20    | 14    | 8     | 30     | Ccl12   |
| Ccl17   | 3     | 3     | 1     | 5     | 7     | 10    | 9     | 0     | 2     | 0      | 0     | 1     | 0     | 1     | 7     | 2     | 5     | 2     | 0     | 0     | 3     | 2     | 1     | 0     | 5     | 5     | 1     | 0      | Ccl17   |
| Ccl2    | 2     | 4     | 2     | 6     | 7     | 14    | 0     | 12    | 40    | 5      | 69    | 25    | 19    | 19    | 22    | 5     | 0     | 3     | 3     | 1     | 4     | 22    | 51    | 24    | 32    | 16    | 9     | 11     | Ccl2    |
| Ccl20   | 0     | 0     | 0     | 0     | 0     | 2     | 0     | 0     | 1     | 0      | 0     | 0     | 0     | 1     | 0     | 0     | 0     | 0     | 1     | 0     | 0     | 0     | 2     | 0     | 0     | 4     | 1     | 1      | Ccl20   |
| Ccl21a  | 12    | 0     | 0     | 0     | 0     | 0     | 0     | 0     | 0     | 0      | 0     | 0     | 0     | 0     | 0     | 0     | 0     | 0     | 0     | 0     | 0     | 0     | 0     | 0     | 0     | 27    | 0     | 0      | Ccl21a  |
| Ccl21b  | 10    | 10    | 4     | 12    | 7     | 3     | 2     | 2     | 0     | 2      | 0     | 1     | 0     | 0     | 3     | 6     | 1     | 4     | 3     | 8     | 10    | 0     | 0     | 1     | 3     | 2     | 0     | 1      | Ccl21b  |
| Ccl21d  | 0     | 3     | 4     | 2     | 0     | 3     | 0     | 0     | 0     | 1      | 0     | 1     | 3     | 1     | 0     | 4     | 1     | 0     | 5     | 1     | 0     | 0     | 0     | 0     | 0     | 0     | 0     | 0      | Ccl21d  |
| Ccl22   | 0     | 3     | 0     | 0     | 0     | 0     | 0     | 0     | 0     | 0      | 0     | 0     | 0     | 0     | 0     | 0     | 0     | 0     | 1     | 0     | 0     | 0     | 0     | 0     | 0     | 0     | 0     | 0      | Ccl22   |
| Ccl24   | 22    | 24    | 49    | 35    | 36    | 40    | 13    | 61    | 46    | 43     | 63    | 27    | 56    | 38    | 21    | 33    | 36    | 36    | 24    | 32    | 20    | 53    | 62    | 44    | 51    | 43    | 79    | 36     | Ccl24   |
| Ccl25   | 1344  | 1166  | 935   | 1115  | 1100  | 1198  | 1151  | 1468  | 1243  | 1044   | 1232  | 985   | 1235  | 1062  | 1189  | 1137  | 1010  | 921   | 901   | 1354  | 1144  | 929   | 1111  | 985   | 1092  | 812   | 1219  | 954    | Ccl25   |
| Ccl26   | 0     | 0     | 0     | 8     | 1     | 0     | 0     | 0     | 0     | 0      | 0     | 0     | 0     | 0     | 0     | 0     | 0     | 3     | 0     | 0     | 0     | 0     | 0     | 0     | 0     | 0     | 0     | 0      | Ccl26   |
| Ccl27a  | 2160  | 2599  | 2610  | 3580  | 3932  | 3529  | 3832  | 2811  | 2696  | 2937   | 2831  | 2656  | 2427  | 2659  | 2471  | 2301  | 3304  | 3793  | 4203  | 3823  | 3904  | 3240  | 2597  | 2839  | 3307  | 2712  | 2539  | 2455   | Ccl27a  |
| Ccl27b  | 7     | 4     | 7     | 11    | 2     | 9     | 2     | 4     | 7     | 3      | 6     | 3     | 6     | 0     | 3     | 9     | 2     | 3     | 13    | 5     | 4     | 10    | 6     | 3     | 10    | 1     | 5     | 8      | Ccl27b  |
| Ccl28   | 125   | 87    | 99    | 159   | 167   | 246   | 226   | 89    | 133   | 126    | 121   | 168   | 118   | 105   | 185   | 81    | 180   | 68    | 104   | 203   | 273   | 244   | 198   | 230   | 86    | 138   | 228   | 161    | Ccl28   |
| Ccl3    | 9     | 10    | 7     | 16    | 11    | 11    | 15    | 15    | 12    | 21     | 16    | 10    | 10    | 9     | 5     | 10    | 9     | 23    | 5     | 22    | 13    | 22    | 21    | 11    | 17    | 15    | 10    | 13     | Ccl3    |
| Ccl4    | 0     | 0     | 2     | 0     | 1     | 1     | 0     | 5     | 5     | 3      | 13    | 3     | 2     | 2     | 3     | 7     | 2     | 6     | 1     | 0     | 2     | 2     | 5     | 1     | 0     | 9     | 0     | 2      | Ccl4    |
| Ccl5    | 0     | 0     | 3     | 0     | 0     | 0     | 0     | 1     | 2     | 0      | 8     | 0     | 1     | 0     | 3     | 0     | 0     | 0     | 0     | 0     | 0     | 0     | 3     | 2     | 0     | 0     | 2     | 0      | Ccl5    |
| Ccl6    | 25    | 20    | 25    | 13    | 28    | 22    | 18    | 49    | 36    | 23     | 50    | 22    | 33    | 47    | 13    | 37    | 22    | 33    | 19    | 36    | 26    | 32    | 41    | 33    | 31    | 38    | 44    | 51     | Ccl6    |
| Ccl7    | 3     | 0     | 5     | 6     | 4     | 3     | 1     | 11    | 36    | 15     | 48    | 15    | 11    | 7     | 4     | 2     | 2     | 9     | 5     | 4     | 3     | 20    | 44    | 28    | 44    | 17    | 7     | 9      | Ccl7    |
| Ccl8    | 0     | 0     | 0     | 0     | 0     | 0     | 0     | 0     | 0     | 0      | 1     | 0     | 0     | 0     | 0     | 0     | 0     | 0     | 0     | 0     | 0     | 0     | 0     | 0     | 0     | 0     | 0     | 0      | Ccl8    |
| Ccl9    | 57    | 35    | 52    | 42    | 56    | 50    | 51    | 64    | 84    | 69     | 90    | 51    | 61    | 65    | 55    | 70    | 37    | 70    | 37    | 64    | 65    | 80    | 113   | 75    | 60    | 108   | 83    | 107    | Ccl9    |
| Ccm2    | 3054  | 3858  | 3754  | 3966  | 3458  | 3405  | 3489  | 2251  | 2348  | 2541</ |       |       |       |       |       |       |       |       |       |       |       |       |       |       |       |       |       |        |         |

|         |       |       |       |       |       |       |       |       |       |       |       |       |       |       |       |       |       |       |       |       |       |       |       |       |       |       |       |       |         |       |
|---------|-------|-------|-------|-------|-------|-------|-------|-------|-------|-------|-------|-------|-------|-------|-------|-------|-------|-------|-------|-------|-------|-------|-------|-------|-------|-------|-------|-------|---------|-------|
| Ccnj    | 1888  | 1700  | 2759  | 2041  | 2284  | 2095  | 2292  | 3466  | 2998  | 3504  | 3054  | 4830  | 4204  | 5110  | 1843  | 1606  | 2544  | 1789  | 2352  | 1929  | 2154  | 3487  | 2795  | 4258  | 4052  | 5020  | 4865  | 5242  | Ccnj    |       |
| Ccnj1   | 1329  | 1640  | 1994  | 1500  | 1540  | 1386  | 1345  | 1072  | 938   | 998   | 953   | 1434  | 1446  | 1276  | 1506  | 1561  | 1846  | 1513  | 1626  | 1371  | 1369  | 1126  | 870   | 1057  | 1030  | 1531  | 1470  | 1511  | Ccnj1   |       |
| Ccnk    | 5257  | 6026  | 7490  | 6933  | 5530  | 5166  | 5428  | 4114  | 4298  | 5096  | 4743  | 6225  | 4970  | 5918  | 4986  | 5589  | 7123  | 6516  | 6400  | 4431  | 5940  | 4782  | 3935  | 5600  | 5528  | 6968  | 5087  | 5994  | Ccnk    |       |
| Ccnl1   | 6124  | 4950  | 6118  | 6088  | 5543  | 5760  | 5841  | 9867  | 8057  | 7466  | 8381  | 9104  | 8579  | 8542  | 6224  | 5667  | 5786  | 5529  | 5531  | 6369  | 5525  | 8808  | 8471  | 8004  | 7812  | 8338  | 8836  | 8579  | Ccnl1   |       |
| Ccnl2   | 10117 | 9709  | 11112 | 11726 | 12584 | 11460 | 11587 | 17484 | 16200 | 17309 | 19171 | 16993 | 16082 | 16814 | 9973  | 10110 | 11304 | 11855 | 12338 | 11298 | 11491 | 19298 | 16371 | 18271 | 18075 | 16575 | 16518 | 17165 | Ccnl2   |       |
| Ccno    | 153   | 170   | 171   | 162   | 133   | 137   | 154   | 105   | 130   | 96    | 95    | 276   | 229   | 229   | 150   | 183   | 177   | 160   | 148   | 138   | 140   | 87    | 185   | 173   | 160   | 335   | 218   | 259   | Ccno    |       |
| Ccnq    | 683   | 775   | 691   | 628   | 561   | 490   | 723   | 685   | 737   | 655   | 648   | 893   | 716   | 795   | 644   | 616   | 712   | 601   | 624   | 645   | 616   | 530   | 782   | 772   | 634   | 916   | 816   | 890   | Ccnq    |       |
| Ccnt1   | 10146 | 10051 | 9055  | 10382 | 10137 | 10140 | 10464 | 10297 | 8576  | 8909  | 8393  | 9046  | 8781  | 9010  | 10199 | 9749  | 10031 | 10657 | 10137 | 10619 | 10613 | 8928  | 8418  | 8773  | 9717  | 7083  | 9547  | 9227  | Ccnt1   |       |
| Ccnt2   | 15733 | 13408 | 12520 | 15191 | 15273 | 17087 | 16955 | 18516 | 15599 | 15490 | 16776 | 17512 | 16894 | 17969 | 15380 | 13374 | 13257 | 14712 | 14758 | 17409 | 16753 | 15797 | 14756 | 15185 | 17505 | 12678 | 18500 | 16185 | Ccnt2   |       |
| Ccny    | 12708 | 10739 | 11763 | 12142 | 10998 | 12038 | 12262 | 11337 | 9921  | 9919  | 10415 | 10315 | 10287 | 10722 | 13102 | 10789 | 11581 | 11483 | 11681 | 11950 | 11717 | 10475 | 10270 | 10216 | 10452 | 10519 | 10322 | 10863 | Ccny    |       |
| Ccny11  | 5783  | 5023  | 5542  | 5154  | 4330  | 4573  | 4975  | 2911  | 2741  | 2978  | 2932  | 3420  | 3333  | 3274  | 5625  | 5453  | 5016  | 5113  | 4472  | 4403  | 4513  | 3220  | 2875  | 3121  | 3078  | 3415  | 3362  | 3635  | Ccny11  |       |
| Ccp10   | 16827 | 15260 | 13025 | 14181 | 13689 | 14474 | 16584 | 14550 | 12125 | 12453 | 11991 | 13421 | 12465 | 14458 | 16143 | 14702 | 14205 | 13596 | 14613 | 16703 | 16009 | 10415 | 11549 | 12951 | 12046 | 11728 | 14181 | 13459 | Ccp10   |       |
| Ccpg1   | 335   | 293   | 383   | 489   | 441   | 456   | 480   | 383   | 315   | 346   | 301   | 286   | 287   | 331   | 365   | 442   | 380   | 484   | 392   | 387   | 406   | 414   | 328   | 322   | 385   | 294   | 228   | 228   | Ccpg1   |       |
| Ccpgl0s | 364   | 437   | 414   | 430   | 402   | 297   | 398   | 353   | 434   | 366   | 336   | 370   | 390   | 411   | 496   | 379   | 469   | 369   | 459   | 487   | 407   | 418   | 417   | 463   | 345   | 416   | 378   | 452   | Ccpgl0s |       |
| Ccr1    | 44    | 16    | 56    | 19    | 28    | 42    | 29    | 100   | 101   | 75    | 154   | 90    | 113   | 54    | 29    | 35    | 45    | 42    | 38    | 40    | 18    | 124   | 201   | 123   | 101   | 138   | 98    | 103   | Ccr1    |       |
| Ccr10   | 1     | 5     | 7     | 3     | 3     | 0     | 8     | 1     | 2     | 1     | 6     | 2     | 0     | 3     | 5     | 2     | 12    | 11    | 8     | 6     | 9     | 5     | 6     | 11    | 4     | 1     | 1     | 2     | Ccr10   |       |
| Ccr11   | 0     | 0     | 0     | 0     | 0     | 0     | 0     | 0     | 2     | 2     | 1     | 0     | 1     | 0     | 0     | 1     | 0     | 0     | 0     | 0     | 1     | 0     | 1     | 0     | 0     | 0     | 0     | 0     | Ccr11   |       |
| Ccr2    | 7     | 3     | 16    | 1     | 3     | 36    | 10    | 68    | 118   | 94    | 185   | 35    | 31    | 28    | 11    | 3     | 3     | 6     | 8     | 7     | 5     | 57    | 159   | 56    | 52    | 73    | 36    | 30    | Ccr2    |       |
| Ccr3    | 1     | 0     | 5     | 0     | 1     | 2     | 1     | 0     | 4     | 3     | 3     | 3     | 3     | 0     | 0     | 0     | 0     | 0     | 0     | 0     | 0     | 5     | 3     | 0     | 4     | 6     | 0     | 1     | Ccr3    |       |
| Ccr4    | 6     | 5     | 14    | 3     | 3     | 7     | 1     | 0     | 1     | 0     | 0     | 0     | 3     | 0     | 4     | 4     | 12    | 22    | 3     | 13    | 4     | 0     | 3     | 0     | 1     | 6     | 0     | 0     | Ccr4    |       |
| Ccr5    | 21    | 11    | 5     | 20    | 26    | 9     | 6     | 73    | 60    | 47    | 93    | 64    | 42    | 40    | 5     | 12    | 0     | 12    | 13    | 17    | 17    | 95    | 120   | 42    | 43    | 53    | 42    | 58    | Ccr5    |       |
| Ccr6    | 0     | 0     | 0     | 0     | 0     | 0     | 0     | 0     | 0     | 0     | 2     | 0     | 0     | 0     | 0     | 0     | 0     | 0     | 0     | 1     | 0     | 0     | 0     | 0     | 2     | 0     | 0     | 0     | Ccr6    |       |
| Ccr7    | 12    | 14    | 11    | 4     | 2     | 4     | 3     | 9     | 5     | 14    | 7     | 1     | 12    | 6     | 5     | 11    | 10    | 1     | 0     | 2     | 6     | 7     | 4     | 7     | 0     | 11    | 2     | 9     | Ccr7    |       |
| Ccr8    | 0     | 0     | 0     | 0     | 0     | 0     | 0     | 0     | 6     | 1     | 4     | 0     | 0     | 0     | 0     | 1     | 0     | 1     | 1     | 0     | 0     | 0     | 5     | 0     | 0     | 0     | 0     | 0     | Ccr8    |       |
| Ccr9    | 9     | 6     | 3     | 3     | 11    | 4     | 7     | 32    | 7     | 17    | 18    | 8     | 16    | 13    | 0     | 5     | 0     | 8     | 9     | 12    | 15    | 20    | 23    | 10    | 19    | 11    | 15    | 9     | Ccr9    |       |
| Ccr12   | 39    | 32    | 26    | 31    | 26    | 36    | 20    | 31    | 45    | 52    | 20    | 29    | 71    | 68    | 41    | 44    | 36    | 18    | 38    | 33    | 38    | 33    | 38    | 38    | 45    | 46    | 65    | 38    | 80      | Ccr12 |
| Ccs     | 1547  | 1837  | 1669  | 1933  | 1767  | 1905  | 1541  | 1216  | 1408  | 1378  | 1656  | 1478  | 1625  | 1436  | 1548  | 1801  | 1865  | 1875  | 1786  | 1645  | 1529  | 1253  | 1383  | 1626  | 1566  | 1531  | 1828  | 1533  | Ccs     |       |
| Ccsap   | 1051  | 1153  | 1142  | 1332  | 1156  | 1026  | 1218  | 497   | 590   | 630   | 387   | 709   | 504   | 681   | 1129  | 1110  | 1279  | 1105  | 1337  | 1097  | 1202  | 461   | 492   | 652   | 645   | 786   | 585   | 616   | Ccsap   |       |
| Ccser1  | 1380  | 1278  | 832   | 2053  | 2570  | 2422  | 2856  | 2356  | 2252  | 1959  | 1751  | 1813  | 1398  | 1793  | 1731  | 1115  | 1460  | 2128  | 2371  | 2430  | 2673  | 2461  | 1927  | 1946  | 2522  | 1578  | 1407  | 1568  | Ccser1  |       |
| Ccser2  | 9197  | 7540  | 5331  | 8273  | 11207 | 10006 | 10178 | 9514  | 9094  | 8129  | 8283  | 6510  | 7629  | 6634  | 10247 | 8781  | 6697  | 8757  | 8358  | 9709  | 9623  | 9733  | 8303  | 6182  | 8422  | 4386  | 6334  | 5954  | Ccser2  |       |
| Cct2    | 33894 | 34854 | 34401 | 30603 | 30018 | 29696 | 34274 | 29916 | 27376 | 25849 | 25514 | 29915 | 28200 | 31556 | 34867 | 30368 | 33695 | 30660 | 31316 | 34247 | 32914 | 26174 | 26669 | 29138 | 28763 | 34081 | 31817 | 33993 | Cct2    |       |
| Cct3    | 27117 | 28249 | 26068 | 21694 | 20994 | 21132 | 24462 | 26668 | 24800 | 21493 | 20905 | 26998 | 24524 | 26631 | 27447 | 23934 | 24877 | 21183 | 22673 | 26058 | 23055 | 21343 | 24205 | 24405 | 22603 | 29546 | 28130 | 28968 | Cct3    |       |
| Cct4    | 28894 | 25568 | 25540 | 23545 | 22154 | 21703 | 26060 | 27352 | 22302 | 20660 | 19170 | 23734 | 22484 | 23571 | 30995 | 25932 | 24455 | 22774 | 22614 | 26341 | 24272 | 21672 | 22867 | 21470 | 20378 | 24943 | 24659 | 25891 | Cct4    |       |
| Cct5    | 30222 | 34389 | 28298 | 26053 | 24648 | 25584 | 27968 | 28924 | 27897 | 24217 | 23355 | 27591 | 25420 | 27860 | 32220 | 29491 | 27786 | 25608 | 27841 | 31129 | 27539 | 23118 | 27754 | 26644 | 25131 | 31004 | 28483 | 30197 | Cct5    |       |
| Cct6a   | 32156 | 29365 | 30582 | 26896 | 26684 | 27453 | 30979 | 35067 | 29967 | 27740 | 27938 | 32630 | 31926 | 33738 | 33712 | 28200 | 28821 | 26387 | 28906 | 33190 | 29104 | 27693 | 29613 | 30918 | 31106 | 37314 | 35404 | 36032 | Cct6a   |       |
| Cct6b   | 52    | 68    | 50    | 89    | 57    | 49    | 80    | 24    | 25    | 19    | 21    | 37    | 37    | 36    | 66    | 49    | 44    | 62    | 54    | 50    | 41    | 18    | 27    | 28    | 22    | 21    | 34    | 37    | Cct6b   |       |
| Cct7    | 28884 | 32204 | 28726 | 28604 | 26333 | 27507 | 28008 | 25690 | 24320 | 22314 | 21792 | 26729 | 24581 | 26648 | 29050 | 27493 | 28983 | 27467 | 30684 | 30385 | 28982 | 22262 | 24320 | 25411 | 25258 | 29113 | 27663 | 27303 | Cct7    |       |
| Cct8    | 39167 | 35510 | 37913 | 31819 | 28643 | 29026 | 34025 | 34221 | 27882 | 24544 | 25130 | 30987 | 28776 | 32231 | 40856 | 35392 | 35178 | 30941 | 30339 | 36214 | 31614 | 27299 | 27661 | 28282 | 27246 | 34409 | 31752 | 33583 | Cct8    |       |
| Cct81f  | 1     | 0     | 8     | 6     | 6     | 0     | 0     | 0     | 0     | 0     | 0     | 0     | 0     | 0     | 0     | 3     | 4     | 2     | 9     | 4     | 2     | 3     | 0     | 0     | 0     | 0     | 0     | 0     | Cct81f  |       |
| Cc11    | 3842  | 3540  | 3648  | 3263  | 3360  | 3232  | 3835  | 5069  | 4234  | 4363  | 4271  | 4997  | 4589  | 5255  | 4092  | 3372  | 3585  | 3244  | 3438  | 3756  | 3706  | 4288  | 4360  | 4639  | 4584  | 5280  | 5210  | 5479  | Cc11    |       |
| Cd101   | 37    | 61    | 14    | 49    | 51    | 48    | 53    | 15    | 16    | 16    | 16    | 24    | 16    | 19    | 30    | 44    | 34    | 51    | 63    | 43    | 56    | 10    | 8     | 25    | 23    | 20    | 10    | 13    | Cd101   |       |
| Cd109   | 1518  | 1104  | 1164  | 756   | 743   | 1161  | 686   | 1384  | 1448  | 1248  | 1359  | 1278  | 1346  | 1254  | 1282  | 1408  | 915   | 1081  | 756   | 879   | 721   | 1036  | 1515  | 1218  | 1121  | 1191  | 1399  | 1299  | Cd109   |       |
| Cd14    | 20    | 20    | 20    | 8     | 16    | 16    | 13    | 16    | 26    | 22    | 39    | 23    | 27    | 22    | 21    | 9     | 8     | 12    | 25    | 17    | 9     | 17    | 39    | 27    | 23    | 34    | 37    | 28    | Cd14    |       |
| Cd151   | 2668  | 2720  | 2736  | 2309  | 2083  | 2284  | 2119  | 2546  | 2639  | 2478  | 2362  | 2467  | 2608  | 2485  | 2466  | 2646  | 2605  | 2176  | 2356  | 2414  | 2232  | 2289  | 2875  | 2491  | 2100  | 2706  | 2692  | 2662  | Cd151   |       |
| Cd160   | 0     | 1     | 3     | 0     | 2     | 0     | 1     | 0     | 0     | 0     | 2     | 0     | 2     | 0     | 0     | 0     | 0     | 0     | 0     | 1     | 3     | 1     | 0     | 0     | 0     | 0     | 0     | 0     | Cd160   |       |
| Cd163   | 2     | 3     | 2     | 9     | 4     | 5     | 10    | 5     | 16    | 7     | 36    | 4     | 9     | 11    | 1     | 4     | 0     | 14    | 8     | 5     | 9     | 35    | 44    | 20    | 24    | 5     | 7     | 1     | Cd163   |       |
| Cd164   | 16492 | 11153 | 12691 | 11211 | 9692  | 11084 | 10694 | 12003 | 11293 | 10113 | 12617 | 10461 | 11128 | 10099 | 14600 | 15492 | 10973 | 12123 | 9809  | 10787 | 10383 | 10559 | 13230 | 10578 | 9168  | 12943 | 10479 | 10498 | Cd164   |       |
| Cd16412 | 80    | 67    | 51    | 41    | 56    | 33    | 25    | 9     | 36    | 12    | 21    | 14    | 18    | 15    | 61    | 80    | 48    | 53    | 39    | 27    | 14    | 10    | 35    | 20    | 9     | 32    | 22    | 14    | Cd16412 |       |
| Cd177   | 1     | 2     | 10    | 9     | 2     | 0     | 7     | 15    | 11    | 13    | 14    | 8     | 11    | 7     | 3     | 3     | 3     | 1     | 8     | 4     | 7     | 19    | 20    | 7     | 18    | 5     | 9     | Cd177 |         |       |
| Cd180   | 36    | 43    | 38    | 21    | 47    | 49    | 38    | 127   | 123   | 140   | 162   | 143   | 129   | 131   | 38    | 44    | 52    | 26    | 30    | 51    | 40    | 139   | 166   | 136   | 97    | 130   |       |       |         |       |

|          |      |      |      |      |      |      |      |      |      |      |      |      |      |      |      |      |      |      |      |      |      |      |      |      |      |      |      |      |          |          |
|----------|------|------|------|------|------|------|------|------|------|------|------|------|------|------|------|------|------|------|------|------|------|------|------|------|------|------|------|------|----------|----------|
| Cd300e   | 0    | 0    | 0    | 1    | 0    | 0    | 0    | 1    | 3    | 0    | 3    | 1    | 1    | 2    | 1    | 0    | 0    | 0    | 0    | 0    | 1    | 2    | 1    | 8    | 0    | 0    | 0    | 0    | Cd300e   |          |
| Cd300ib  | 2    | 6    | 2    | 6    | 2    | 1    | 1    | 5    | 7    | 1    | 11   | 3    | 1    | 3    | 4    | 3    | 0    | 1    | 0    | 0    | 0    | 13   | 6    | 5    | 3    | 9    | 2    | 4    | Cd300ib  |          |
| Cd300ld  | 3    | 10   | 10   | 3    | 8    | 8    | 3    | 16   | 5    | 5    | 5    | 10   | 1    | 10   | 11   | 14   | 13   | 7    | 9    | 9    | 8    | 13   | 21   | 13   | 6    | 10   | 6    | 11   | Cd300ld  |          |
| Cd300ld2 | 0    | 0    | 0    | 1    | 1    | 0    | 0    | 0    | 0    | 0    | 1    | 0    | 0    | 0    | 0    | 2    | 0    | 0    | 0    | 0    | 0    | 2    | 0    | 4    | 0    | 0    | 0    | 0    | Cd300ld2 |          |
| Cd300ld3 | 0    | 0    | 0    | 0    | 0    | 0    | 0    | 0    | 0    | 0    | 0    | 4    | 1    | 3    | 0    | 0    | 0    | 2    | 0    | 0    | 1    | 0    | 1    | 0    | 0    | 0    | 2    | 5    | Cd300ld3 |          |
| Cd300ld4 | 0    | 0    | 5    | 1    | 0    | 0    | 1    | 0    | 2    | 0    | 3    | 0    | 0    | 0    | 1    | 1    | 0    | 3    | 0    | 2    | 1    | 0    | 3    | 1    | 1    | 1    | 0    | 0    | 1        | Cd300ld4 |
| Cd300ld5 | 0    | 0    | 1    | 0    | 0    | 0    | 0    | 0    | 0    | 0    | 0    | 1    | 0    | 0    | 0    | 1    | 0    | 0    | 0    | 0    | 0    | 0    | 1    | 1    | 3    | 0    | 0    | 0    | Cd300ld5 |          |
| Cd300lf  | 30   | 29   | 41   | 42   | 12   | 13   | 22   | 2    | 12   | 20   | 29   | 5    | 9    | 18   | 17   | 32   | 39   | 26   | 12   | 31   | 14   | 10   | 8    | 18   | 12   | 15   | 9    | 17   | Cd300lf  |          |
| Cd300lg  | 10   | 7    | 3    | 1    | 5    | 2    | 6    | 11   | 16   | 6    | 15   | 5    | 1    | 12   | 20   | 11   | 7    | 3    | 2    | 1    | 4    | 12   | 9    | 8    | 7    | 18   | 10   | 4    | Cd300lg  |          |
| Cd302    | 549  | 365  | 480  | 280  | 331  | 342  | 273  | 529  | 556  | 438  | 629  | 318  | 417  | 360  | 545  | 548  | 403  | 397  | 240  | 341  | 238  | 399  | 733  | 429  | 329  | 505  | 395  | 320  | Cd302    |          |
| Cd320    | 2179 | 2493 | 1832 | 1814 | 1532 | 1670 | 1542 | 1468 | 1451 | 1076 | 1237 | 1334 | 1352 | 1305 | 2065 | 2308 | 1776 | 1777 | 1812 | 2188 | 1693 | 1280 | 1377 | 1309 | 1268 | 1369 | 1331 | 1418 | Cd320    |          |
| Cd33     | 115  | 138  | 104  | 70   | 140  | 91   | 111  | 201  | 228  | 207  | 304  | 230  | 225  | 282  | 1263 | 118  | 122  | 131  | 122  | 149  | 123  | 282  | 299  | 284  | 254  | 199  | 259  | 249  | Cd33     |          |
| Cd34     | 3766 | 3357 | 3624 | 2622 | 2774 | 3410 | 2789 | 3731 | 3975 | 3473 | 4291 | 3476 | 4003 | 3388 | 3753 | 4030 | 2845 | 3140 | 2930 | 3462 | 2904 | 3519 | 5009 | 3359 | 3289 | 4311 | 3669 | 3637 | Cd34     |          |
| Cd36     | 153  | 160  | 178  | 170  | 277  | 231  | 150  | 416  | 439  | 352  | 718  | 234  | 330  | 230  | 261  | 231  | 185  | 253  | 121  | 257  | 167  | 429  | 871  | 289  | 275  | 176  | 252  | 160  | Cd36     |          |
| Cd37     | 25   | 31   | 37   | 33   | 23   | 30   | 25   | 38   | 51   | 38   | 64   | 35   | 33   | 22   | 18   | 38   | 32   | 36   | 30   | 25   | 25   | 48   | 39   | 41   | 44   | 45   | 36   | 21   | Cd37     |          |
| Cd38     | 208  | 135  | 274  | 122  | 143  | 181  | 124  | 296  | 255  | 270  | 419  | 331  | 358  | 248  | 203  | 240  | 124  | 133  | 131  | 124  | 124  | 241  | 389  | 281  | 183  | 415  | 235  | 305  | Cd38     |          |
| Cd3d     | 1    | 0    | 0    | 0    | 0    | 0    | 0    | 0    | 0    | 0    | 0    | 0    | 0    | 1    | 0    | 0    | 0    | 0    | 0    | 0    | 0    | 2    | 1    | 0    | 0    | 0    | 0    | 0    | Cd3d     |          |
| Cd3e     | 0    | 0    | 0    | 0    | 0    | 0    | 2    | 0    | 0    | 0    | 2    | 1    | 0    | 0    | 0    | 0    | 0    | 0    | 0    | 0    | 0    | 2    | 0    | 0    | 0    | 1    | 0    | 1    | Cd3e     |          |
| Cd3eap   | 2500 | 2951 | 2885 | 2941 | 2136 | 2378 | 2492 | 1237 | 1486 | 1354 | 1594 | 1634 | 1524 | 1611 | 2446 | 2756 | 2581 | 2680 | 2251 | 2377 | 2342 | 1168 | 1425 | 1593 | 1534 | 1880 | 1526 | 1689 | Cd3eap   |          |
| Cd3g     | 0    | 0    | 3    | 0    | 0    | 0    | 0    | 2    | 2    | 2    | 7    | 1    | 2    | 2    | 4    | 0    | 0    | 0    | 0    | 0    | 0    | 0    | 8    | 0    | 0    | 4    | 0    | 0    | Cd3g     |          |
| Cd4      | 8    | 10   | 4    | 7    | 15   | 13   | 13   | 12   | 11   | 3    | 14   | 3    | 15   | 4    | 12   | 8    | 0    | 23   | 10   | 9    | 7    | 8    | 21   | 15   | 8    | 10   | 7    | 4    | Cd4      |          |
| Cd40     | 273  | 343  | 339  | 257  | 221  | 236  | 183  | 195  | 204  | 166  | 197  | 176  | 253  | 194  | 287  | 347  | 256  | 299  | 237  | 227  | 247  | 206  | 208  | 225  | 225  | 237  | 241  | 216  | Cd40     |          |
| Cd40lg   | 0    | 0    | 0    | 0    | 0    | 0    | 0    | 0    | 0    | 0    | 0    | 1    | 0    | 0    | 0    | 0    | 0    | 0    | 0    | 0    | 0    | 0    | 0    | 0    | 0    | 0    | 0    | 0    | Cd40lg   |          |
| Cd44     | 655  | 451  | 582  | 320  | 292  | 455  | 284  | 826  | 1100 | 681  | 1266 | 481  | 595  | 488  | 657  | 715  | 351  | 541  | 323  | 303  | 225  | 692  | 1618 | 731  | 543  | 539  | 516  | 484  | Cd44     |          |
| Cd46     | 326  | 189  | 274  | 365  | 533  | 405  | 486  | 601  | 627  | 562  | 632  | 598  | 671  | 700  | 357  | 265  | 278  | 331  | 344  | 359  | 459  | 672  | 574  | 550  | 586  | 433  | 724  | 564  | Cd46     |          |
| Cd47     | 3167 | 2718 | 4244 | 4882 | 5902 | 4773 | 5264 | 3495 | 3299 | 4129 | 4202 | 3247 | 3317 | 3293 | 3687 | 2965 | 4855 | 5292 | 5416 | 4145 | 5332 | 5016 | 3428 | 4010 | 4599 | 3381 | 3225 | 3264 | Cd47     |          |
| Cd48     | 8    | 14   | 17   | 10   | 16   | 16   | 4    | 20   | 30   | 27   | 53   | 10   | 18   | 15   | 9    | 15   | 14   | 18   | 10   | 20   | 14   | 35   | 56   | 25   | 17   | 28   | 6    | 13   | Cd48     |          |
| Cd5      | 2    | 2    | 1    | 7    | 11   | 1    | 0    | 5    | 8    | 2    | 8    | 20   | 6    | 5    | 0    | 6    | 8    | 7    | 9    | 8    | 1    | 5    | 21   | 5    | 13   | 12   | 7    | 12   | Cd5      |          |
| Cd52     | 38   | 56   | 29   | 37   | 39   | 48   | 44   | 29   | 70   | 46   | 86   | 39   | 53   | 60   | 33   | 44   | 48   | 33   | 43   | 30   | 31   | 40   | 91   | 38   | 28   | 71   | 42   | 36   | Cd52     |          |
| Cd53     | 170  | 135  | 137  | 193  | 134  | 213  | 142  | 217  | 264  | 160  | 259  | 180  | 179  | 156  | 195  | 190  | 151  | 145  | 158  | 174  | 154  | 190  | 333  | 179  | 208  | 207  | 195  | 177  | Cd53     |          |
| Cd55     | 226  | 143  | 147  | 73   | 193  | 136  | 95   | 585  | 499  | 451  | 423  | 175  | 289  | 179  | 186  | 258  | 114  | 121  | 113  | 160  | 101  | 378  | 673  | 390  | 265  | 276  | 214  | 148  | Cd55     |          |
| Cd55b    | 1    | 4    | 0    | 0    | 0    | 1    | 0    | 2    | 1    | 0    | 0    | 1    | 0    | 0    | 1    | 0    | 0    | 0    | 0    | 0    | 2    | 0    | 1    | 2    | 0    | 0    | 0    | 1    | Cd55b    |          |
| Cd59a    | 603  | 449  | 584  | 274  | 245  | 282  | 401  | 413  | 339  | 256  | 373  | 316  | 725  | 510  | 757  | 558  | 470  | 302  | 279  | 339  | 278  | 428  | 514  | 351  | 260  | 482  | 625  | 736  | Cd59a    |          |
| Cd59b    | 96   | 53   | 56   | 61   | 100  | 106  | 64   | 61   | 89   | 52   | 74   | 46   | 100  | 57   | 87   | 80   | 71   | 111  | 39   | 89   | 84   | 47   | 72   | 43   | 60   | 55   | 69   | 58   | Cd59b    |          |
| Cd5l     | 7    | 17   | 10   | 29   | 8    | 23   | 1    | 1    | 11   | 14   | 11   | 3    | 11   | 3    | 3    | 24   | 15   | 12   | 4    | 22   | 4    | 8    | 21   | 25   | 8    | 16   | 13   | 33   | Cd5l     |          |
| Cd6      | 3    | 1    | 0    | 2    | 2    | 1    | 0    | 0    | 2    | 3    | 3    | 0    | 0    | 1    | 3    | 3    | 2    | 4    | 0    | 0    | 0    | 0    | 0    | 0    | 0    | 1    | 0    | 1    | Cd6      |          |
| Cd63     | 5246 | 5110 | 7105 | 5197 | 4866 | 5550 | 3355 | 4484 | 6136 | 5405 | 8095 | 4513 | 6102 | 3617 | 5037 | 5907 | 4880 | 5460 | 4875 | 4839 | 3623 | 4234 | 7441 | 5475 | 4660 | 6157 | 5590 | 4332 | Cd63     |          |
| Cd68     | 362  | 441  | 442  | 445  | 430  | 403  | 355  | 431  | 523  | 510  | 494  | 565  | 559  | 529  | 348  | 428  | 381  | 481  | 394  | 335  | 332  | 546  | 612  | 552  | 525  | 680  | 568  | 520  | Cd68     |          |
| Cd69     | 3    | 3    | 3    | 6    | 2    | 0    | 3    | 1    | 4    | 3    | 1    | 0    | 0    | 1    | 0    | 5    | 6    | 0    | 0    | 0    | 0    | 2    | 4    | 2    | 0    | 1    | 0    | 0    | Cd69     |          |
| Cd7      | 2    | 3    | 0    | 2    | 2    | 0    | 0    | 1    | 4    | 3    | 5    | 0    | 0    | 1    | 3    | 1    | 0    | 1    | 0    | 0    | 0    | 7    | 10   | 0    | 0    | 3    | 12   | 0    | Cd7      |          |
| Cd70     | 3    | 2    | 2    | 0    | 1    | 1    | 1    | 5    | 3    | 3    | 2    | 3    | 7    | 4    | 0    | 2    | 2    | 0    | 2    | 2    | 2    | 5    | 3    | 7    | 0    | 2    | 3    | 4    | Cd70     |          |
| Cd72     | 18   | 11   | 27   | 4    | 18   | 8    | 11   | 5    | 7    | 3    | 20   | 11   | 9    | 7    | 17   | 12   | 23   | 14   | 14   | 23   | 12   | 10   | 8    | 7    | 3    | 21   | 14   | 8    | Cd72     |          |
| Cd74     | 7    | 12   | 14   | 4    | 9    | 12   | 15   | 27   | 32   | 38   | 57   | 25   | 12   | 13   | 9    | 14   | 14   | 18   | 18   | 7    | 12   | 27   | 62   | 20   | 20   | 16   | 17   | 9    | Cd74     |          |
| Cd79a    | 24   | 55   | 40   | 40   | 35   | 35   | 46   | 10   | 23   | 17   | 29   | 5    | 15   | 9    | 21   | 44   | 78   | 62   | 55   | 47   | 39   | 15   | 24   | 25   | 26   | 18   | 16   | 17   | Cd79a    |          |
| Cd79b    | 16   | 12   | 29   | 17   | 11   | 9    | 8    | 26   | 44   | 26   | 28   | 24   | 48   | 16   | 17   | 19   | 13   | 17   | 12   | 14   | 16   | 15   | 44   | 32   | 16   | 43   | 20   | 30   | Cd79b    |          |
| Cd80     | 24   | 16   | 16   | 17   | 56   | 21   | 16   | 32   | 23   | 38   | 77   | 407  | 5998 | 5498 | 7526 | 8164 | 7714 | 7472 | 7266 | 7718 | 6882 | 6221 | 8951 | 6427 | 6037 | 6666 | 5602 | 5658 | Cd80     |          |
| Cd81     | 7375 | 7906 | 7721 | 7428 | 7326 | 7003 | 6541 | 6397 | 7474 | 6057 | 7707 | 5532 | 5998 | 5498 | 7526 | 8164 | 7714 | 7472 | 7266 | 7718 | 6882 | 6221 | 8951 | 6427 | 6037 | 6666 | 5602 | 5658 | Cd81     |          |
| Cd82     | 977  | 1011 | 823  | 848  | 870  | 801  | 639  | 642  | 862  | 809  | 1045 | 547  | 745  | 479  | 928  | 1145 | 773  | 862  | 745  | 815  | 670  | 742  | 1216 | 762  | 606  | 754  | 579  | 538  | Cd82     |          |
| Cd83     | 196  | 151  | 165  | 122  | 276  | 166  | 173  | 421  | 402  | 319  | 511  | 215  | 325  | 237  | 212  | 189  | 156  | 179  | 176  | 225  | 177  | 416  | 602  | 257  | 304  | 295  | 255  | 260  | Cd83     |          |
| Cd84     | 77   | 79   | 83   | 66   | 60   | 54   | 61   | 167  | 125  | 106  | 124  | 90   | 95   | 84   | 100  | 98   | 52   | 90   | 59   | 71   | 73   | 84   | 205  | 89   | 103  | 89   | 109  | 115  | Cd84     |          |
| Cd86     | 144  | 148  | 96   | 116  | 117  | 111  | 87   | 142  | 124  | 96   | 140  | 141  | 117  | 126  | 136  | 165  | 71   | 134  | 79   | 133  | 90   | 114  | 190  | 106  | 129  | 134  | 100  | 103  | Cd86     |          |
| Cd8a     | 0    | 0    | 0    | 0    | 0    | 0    | 0    | 0    | 0    | 0    | 0    | 0    | 3    | 1    | 0    | 0    | 0    | 0    | 0    | 0    | 0    | 0    | 3    | 0    | 6    | 0    | 0    | 0    | Cd8a     |          |
| Cd9      | 1855 | 1805 | 1669 | 1538 | 1669 | 1560 | 1437 | 1469 | 1807 | 1433 | 1713 | 1017 | 1111 | 1181 | 1764 | 1976 | 1484 | 1791 | 1442 | 1538 | 1457 | 1148 | 2084 | 1475 | 1204 | 1398 | 992  | 1130 | Cd9      |          |
| Cd93     | 2599 | 2362 | 2871 | 2396 | 3187 | 3204 | 3030 | 3683 | 3939 | 4675 | 5195 | 4362 | 4754 | 4123 | 2624 | 2642 | 2817 | 2793 | 2897 | 2831 | 3170 | 5068 | 4644 | 4377 | 4608 | 4076 | 4402 | 4321 | Cd93     |          |
| Cd96     | 2    | 3    | 0    | 1    | 0    | 0    | 3    | 2    | 4    | 3    | 9    | 5    | 1    | 2    | 1    | 2    | 0    | 0    | 2    | 0    | 3    | 12   | 3    | 2    | 1    | 3    | 0    | 2    | Cd96     |          |
| Cd99l2   | 5261 | 5790 | 4679 | 5751 | 6    |      |      |      |      |      |      |      |      |      |      |      |      |      |      |      |      |      |      |      |      |      |      |      |          |          |

|          |       |       |       |       |       |       |       |       |       |       |       |       |       |       |       |       |       |       |       |       |       |       |       |       |       |       |       |       |          |       |
|----------|-------|-------|-------|-------|-------|-------|-------|-------|-------|-------|-------|-------|-------|-------|-------|-------|-------|-------|-------|-------|-------|-------|-------|-------|-------|-------|-------|-------|----------|-------|
| Cdc42ep1 | 279   | 439   | 421   | 293   | 320   | 323   | 244   | 512   | 613   | 636   | 766   | 535   | 660   | 512   | 364   | 468   | 343   | 255   | 236   | 224   | 234   | 560   | 771   | 526   | 451   | 716   | 536   | 542   | Cdc42ep1 |       |
| Cdc42ep2 | 588   | 769   | 577   | 627   | 749   | 659   | 660   | 600   | 649   | 561   | 601   | 281   | 432   | 351   | 636   | 717   | 521   | 721   | 734   | 722   | 708   | 623   | 754   | 491   | 477   | 334   | 351   | 320   | Cdc42ep2 |       |
| Cdc42ep3 | 1228  | 1061  | 913   | 1197  | 1222  | 1295  | 1132  | 1642  | 1846  | 1737  | 1798  | 1424  | 1479  | 1513  | 1246  | 1082  | 1043  | 1252  | 1111  | 984   | 1084  | 1890  | 1940  | 1642  | 1885  | 1292  | 1290  | 1301  | Cdc42ep3 |       |
| Cdc42ep4 | 6144  | 7519  | 7306  | 7063  | 6748  | 6490  | 5946  | 6232  | 6869  | 6341  | 5977  | 7857  | 7479  | 7499  | 5573  | 6486  | 7234  | 6645  | 7581  | 6712  | 6264  | 5648  | 6613  | 7407  | 6710  | 9464  | 7696  | 7903  | Cdc42ep4 |       |
| Cdc42ep5 | 423   | 459   | 452   | 293   | 205   | 297   | 177   | 628   | 481   | 283   | 486   | 331   | 424   | 297   | 352   | 454   | 352   | 294   | 210   | 177   | 130   | 244   | 504   | 411   | 219   | 422   | 345   | 374   | Cdc42ep5 |       |
| Cdc42se1 | 4637  | 5115  | 5334  | 5002  | 4743  | 4809  | 4516  | 4510  | 5157  | 4914  | 4826  | 5903  | 5211  | 5486  | 4195  | 4738  | 5443  | 4716  | 5299  | 4681  | 4464  | 4443  | 4947  | 5587  | 5411  | 6492  | 5713  | 5638  | Cdc42se1 |       |
| Cdc42se2 | 12629 | 13985 | 14191 | 12746 | 11900 | 12353 | 12976 | 12678 | 10508 | 10825 | 9642  | 14641 | 13189 | 14976 | 13362 | 11840 | 13655 | 12301 | 12705 | 13952 | 12720 | 11478 | 10584 | 12599 | 13023 | 14342 | 15287 | 15688 | Cdc42se2 |       |
| Cdc45    | 2550  | 2634  | 2545  | 1778  | 1315  | 1704  | 1918  | 2141  | 1988  | 1637  | 1564  | 2709  | 2113  | 2574  | 2346  | 2220  | 2051  | 1692  | 1905  | 2036  | 1652  | 1332  | 1827  | 2134  | 1842  | 3098  | 2638  | 2633  | Cdc45    |       |
| Cdc51    | 9682  | 9450  | 9222  | 8681  | 8207  | 8286  | 9269  | 8551  | 7659  | 7434  | 7323  | 7638  | 7244  | 8560  | 9508  | 9290  | 8747  | 8445  | 8608  | 9382  | 8930  | 6990  | 7262  | 7264  | 7175  | 8348  | 7741  | 8221  | Cdc51    |       |
| Cdc6     | 4265  | 4329  | 4117  | 3122  | 1971  | 2504  | 2759  | 2209  | 1945  | 1687  | 1593  | 2775  | 2251  | 2761  | 3394  | 3768  | 3407  | 2738  | 2593  | 2825  | 2556  | 1534  | 1746  | 2180  | 1758  | 3398  | 2874  | 3012  | Cdc6     |       |
| Cdc7     | 6428  | 5417  | 5494  | 5220  | 5121  | 5063  | 5515  | 5973  | 5338  | 5115  | 5002  | 5295  | 4909  | 5487  | 6120  | 6227  | 5782  | 5728  | 5368  | 6181  | 5235  | 4936  | 5094  | 5284  | 5222  | 5381  | 5433  | 5282  | Cdc7     |       |
| Cdc73    | 7600  | 5587  | 7695  | 8176  | 7324  | 8020  | 9095  | 6277  | 5704  | 6152  | 5942  | 7075  | 6338  | 7649  | 7366  | 6481  | 7660  | 7913  | 7772  | 7279  | 8691  | 6276  | 6482  | 6548  | 6976  | 7108  | 7772  | Cdc73 |          |       |
| Cdca2    | 3956  | 3664  | 3666  | 2963  | 2339  | 2869  | 3060  | 4415  | 4360  | 3918  | 3583  | 5944  | 5008  | 6058  | 3418  | 3480  | 3272  | 2686  | 3069  | 3112  | 2829  | 2747  | 3619  | 4720  | 4233  | 6137  | 5972  | 5877  | Cdca2    |       |
| Cdca3    | 7401  | 7311  | 6865  | 4928  | 3679  | 4281  | 5296  | 4827  | 4287  | 3859  | 3249  | 6051  | 5069  | 6311  | 6572  | 5614  | 6079  | 4112  | 4754  | 5630  | 4653  | 3098  | 3680  | 5141  | 4160  | 7475  | 6107  | 6378  | Cdca3    |       |
| Cdca4    | 4135  | 3947  | 4204  | 3373  | 2962  | 3585  | 3378  | 4047  | 4341  | 4159  | 3714  | 5749  | 4735  | 5181  | 3535  | 3647  | 3854  | 2965  | 3777  | 3765  | 3092  | 3402  | 3893  | 4803  | 4120  | 6615  | 5972  | 5847  | Cdca4    |       |
| Cdca5    | 2241  | 2044  | 2247  | 1560  | 1244  | 1354  | 1658  | 1717  | 1622  | 1373  | 1212  | 2282  | 1982  | 2331  | 1834  | 1739  | 1985  | 1346  | 1771  | 1626  | 1489  | 1163  | 1339  | 1467  | 1572  | 2714  | 2529  | 2522  | Cdca5    |       |
| Cdca7    | 7118  | 7012  | 7906  | 6854  | 5381  | 6088  | 7156  | 6133  | 6661  | 6539  | 5773  | 9321  | 6482  | 9602  | 6484  | 6023  | 7379  | 6400  | 7291  | 6263  | 6814  | 4700  | 5400  | 8606  | 7365  | 12012 | 8911  | 9311  | Cdca7    |       |
| Cdca7l   | 2382  | 1970  | 2403  | 1781  | 1138  | 1577  | 1604  | 1419  | 1521  | 1521  | 1270  | 1836  | 1685  | 1915  | 2000  | 1867  | 1817  | 1478  | 1414  | 1531  | 1381  | 884   | 1392  | 1579  | 1254  | 2407  | 1935  | 2059  | Cdca7l   |       |
| Cdca8    | 5501  | 5967  | 7255  | 4947  | 3506  | 3985  | 4340  | 4258  | 4558  | 4517  | 4190  | 7404  | 6254  | 7276  | 4759  | 4939  | 5934  | 4163  | 4769  | 4208  | 3975  | 3484  | 3879  | 6068  | 4938  | 9320  | 7475  | 7847  | Cdca8    |       |
| Cdcp1    | 253   | 85    | 44    | 27    | 20    | 26    | 2     | 346   | 447   | 302   | 268   | 39    | 137   | 51    | 99    | 118   | 20    | 35    | 16    | 8     | 2     | 65    | 474   | 242   | 45    | 217   | 27    | 45    | Cdcp1    |       |
| Cdcp2    | 15    | 18    | 0     | 13    | 14    | 2     | 6     | 5     | 4     | 1     | 11    | 16    | 11    | 10    | 15    | 19    | 6     | 14    | 1     | 5     | 17    | 0     | 3     | 0     | 3     | 0     | 6     | 5     | Cdcp2    |       |
| Cdcp3    | 0     | 1     | 0     | 0     | 2     | 0     | 2     | 2     | 4     | 0     | 0     | 1     | 0     | 1     | 0     | 1     | 2     | 0     | 0     | 1     | 0     | 2     | 3     | 2     | 5     | 0     | 0     | 0     | 0        | Cdcp3 |
| Cdh1     | 2157  | 1012  | 725   | 535   | 336   | 685   | 110   | 1469  | 1976  | 1213  | 1263  | 563   | 878   | 523   | 1154  | 1592  | 384   | 749   | 224   | 138   | 183   | 555   | 2298  | 1271  | 365   | 906   | 549   | 571   | Cdh1     |       |
| Cdh10    | 1059  | 1012  | 845   | 915   | 1262  | 1127  | 1282  | 1484  | 1285  | 1356  | 1166  | 988   | 1057  | 968   | 1153  | 925   | 934   | 1011  | 1152  | 1312  | 1145  | 1248  | 1260  | 973   | 1275  | 914   | 977   | 885   | Cdh10    |       |
| Cdh11    | 12425 | 9485  | 9768  | 5788  | 4775  | 8203  | 3943  | 18434 | 22696 | 16449 | 21192 | 15555 | 20889 | 15409 | 11732 | 13161 | 7154  | 7284  | 4056  | 4713  | 3562  | 16456 | 24192 | 16944 | 13629 | 17939 | 17103 | 16025 | Cdh11    |       |
| Cdh12    | 156   | 111   | 71    | 143   | 250   | 246   | 225   | 448   | 381   | 292   | 330   | 156   | 227   | 231   | 232   | 195   | 147   | 215   | 231   | 268   | 248   | 344   | 278   | 258   | 274   | 106   | 188   | 177   | Cdh12    |       |
| Cdh13    | 992   | 1411  | 829   | 2174  | 3459  | 2683  | 2666  | 2368  | 2996  | 2568  | 2419  | 1330  | 1501  | 1247  | 1375  | 1121  | 1209  | 2775  | 2865  | 2701  | 3543  | 2909  | 2511  | 1914  | 2906  | 802   | 1188  | 1015  | Cdh13    |       |
| Cdh15    | 80    | 105   | 82    | 42    | 47    | 31    | 9     | 92    | 276   | 64    | 1144  | 49    | 90    | 52    | 87    | 173   | 56    | 53    | 26    | 32    | 29    | 242   | 677   | 62    | 63    | 51    | 44    | 46    | Cdh15    |       |
| Cdh16    | 0     | 1     | 0     | 0     | 0     | 5     | 0     | 0     | 0     | 0     | 1     | 0     | 0     | 0     | 0     | 0     | 0     | 0     | 2     | 2     | 0     | 0     | 1     | 0     | 0     | 0     | 0     | 0     | 0        | Cdh16 |
| Cdh17    | 27    | 15    | 51    | 35    | 38    | 28    | 18    | 56    | 63    | 37    | 93    | 39    | 61    | 45    | 26    | 27    | 46    | 34    | 27    | 25    | 47    | 45    | 82    | 50    | 41    | 46    | 72    | 33    | Cdh17    |       |
| Cdh18    | 203   | 204   | 142   | 242   | 464   | 274   | 275   | 320   | 349   | 277   | 316   | 109   | 203   | 110   | 307   | 254   | 191   | 314   | 307   | 394   | 297   | 309   | 281   | 150   | 214   | 101   | 116   | 85    | Cdh18    |       |
| Cdh19    | 87    | 32    | 19    | 25    | 61    | 15    | 12    | 143   | 188   | 135   | 251   | 39    | 177   | 46    | 70    | 119   | 54    | 39    | 2     | 19    | 9     | 231   | 168   | 70    | 79    | 57    | 53    | 47    | Cdh19    |       |
| Cdh2     | 13664 | 13388 | 15876 | 15107 | 16855 | 17393 | 19784 | 19385 | 21323 | 18254 | 25640 | 22502 | 26413 | 14350 | 12076 | 15432 | 14201 | 16879 | 16215 | 17057 | 21624 | 17395 | 23141 | 24745 | 25630 | 24786 | 25501 | Cdh2  |          |       |
| Cdh20    | 306   | 345   | 579   | 315   | 372   | 323   | 340   | 332   | 354   | 339   | 317   | 396   | 418   | 393   | 382   | 311   | 404   | 263   | 380   | 343   | 340   | 381   | 250   | 298   | 353   | 307   | 346   | 412   | Cdh20    |       |
| Cdh22    | 625   | 916   | 986   | 1129  | 1220  | 993   | 885   | 861   | 825   | 1045  | 851   | 1199  | 840   | 1025  | 613   | 586   | 1306  | 1073  | 1395  | 964   | 1142  | 1277  | 819   | 1179  | 1131  | 1118  | 1004  | 972   | Cdh22    |       |
| Cdh23    | 212   | 203   | 196   | 389   | 501   | 439   | 459   | 342   | 316   | 390   | 324   | 390   | 197   | 362   | 177   | 222   | 249   | 413   | 514   | 419   | 442   | 560   | 216   | 333   | 494   | 140   | 393   | 261   | Cdh23    |       |
| Cdh24    | 3902  | 4569  | 4776  | 5329  | 5380  | 5139  | 4526  | 3602  | 4168  | 4932  | 4242  | 5580  | 4732  | 4736  | 3251  | 4430  | 5341  | 5584  | 6009  | 4221  | 4454  | 5237  | 3875  | 5290  | 5576  | 5520  | 4996  | 4446  | Cdh24    |       |
| Cdh26    | 21    | 3     | 0     | 14    | 5     | 15    | 2     | 66    | 59    | 90    | 80    | 12    | 17    | 18    | 20    | 10    | 0     | 13    | 9     | 6     | 4     | 12    | 93    | 75    | 9     | 53    | 8     | 7     | Cdh26    |       |
| Cdh3     | 1398  | 1026  | 892   | 407   | 216   | 630   | 105   | 888   | 1371  | 1020  | 1460  | 730   | 1144  | 677   | 861   | 1505  | 534   | 573   | 235   | 105   | 103   | 762   | 1566  | 988   | 593   | 965   | 781   | 868   | Cdh3     |       |
| Cdh4     | 3217  | 4343  | 4383  | 5997  | 6925  | 6453  | 6084  | 4224  | 5656  | 5945  | 5619  | 5605  | 4009  | 5300  | 3575  | 3104  | 5326  | 6437  | 6922  | 5272  | 6629  | 6759  | 5403  | 5554  | 7080  | 4853  | 4095  | 4976  | Cdh4     |       |
| Cdh5     | 3057  | 3410  | 4136  | 2976  | 3164  | 3445  | 2457  | 3264  | 4837  | 4790  | 5871  | 4479  | 5451  | 3963  | 2979  | 3816  | 3170  | 3398  | 2608  | 2516  | 2729  | 4921  | 5923  | 4494  | 4364  | 5393  | 4138  | 4075  | Cdh5     |       |
| Cdh6     | 4379  | 3114  | 3010  | 2853  | 3288  | 3426  | 3226  | 5097  | 4811  | 4385  | 4798  | 3806  | 3706  | 4074  | 4229  | 3719  | 2993  | 3042  | 3046  | 3422  | 2962  | 3870  | 4472  | 3668  | 3712  | 3767  | 3884  | 3496  | Cdh6     |       |
| Cdh7     | 886   | 712   | 704   | 1002  | 1219  | 1274  | 1310  | 1652  | 1397  | 1257  | 1111  | 1490  | 1001  | 1721  | 1018  | 724   | 842   | 985   | 1245  | 1181  | 1229  | 1233  | 1120  | 1341  | 1473  | 1305  | 1197  | 1310  | Cdh7     |       |
| Cdh8     | 2025  | 2317  | 2215  | 2344  | 3118  | 3226  | 3390  | 4216  | 2788  | 2930  | 2448  | 2730  | 2454  | 2947  | 2819  | 1694  | 2376  | 2729  | 3179  | 3954  | 3484  | 4012  | 2689  | 2558  | 4485  | 1926  | 2986  | 2976  | Cdh8     |       |
| Cdh9     | 106   | 96    | 100   | 112   | 217   | 172   | 166   | 169   | 216   | 188   | 232   | 94    | 163   | 125   | 119   | 133   | 126   | 173   | 175   | 209   | 204   | 229   | 172   | 136   | 208   | 114   | 112   | 115   | Cdh9     |       |
| Cdhr1    | 323   | 195   | 31    | 155   | 317   | 135   | 115   | 596   | 539   | 517   | 558   | 101   | 607   | 118   | 398   | 466   | 115   | 173   | 110   | 129   | 74    | 525   | 394   | 360   | 303   | 525   | 58    | 63    | Cdhr1    |       |
| Cdhr2    | 5     | 3     | 0     | 2     | 1     | 1     | 2     | 5     | 6     | 9     | 0     | 0     | 2     | 3     | 3     | 2     | 5     | 8     | 5     | 0     | 5     | 7     | 7     | 4     | 3     | 2     | 0     | 0     | Cdhr2    |       |
| Cdhr3    | 51    | 42    | 31    | 80    | 99    | 61    | 75    | 13    | 20    | 16    | 55    | 20    | 34    | 10    | 47    | 50    | 44    | 87    | 59    | 70    | 109   | 18    | 38    | 10    | 20    | 10    | 9     | 9     | Cdhr3    |       |
| Cdhr4    | 54    | 52    | 51    | 49    | 38    | 26    | 11    | 89    | 113   | 102   | 207   | 58    | 88    | 55    | 50    | 72    | 31    | 66    | 18    | 22    |       |       |       |       |       |       |       |       |          |       |



|            |       |       |       |       |       |       |       |       |       |       |       |       |       |       |       |       |       |       |       |       |       |       |       |       |       |       |       |       |            |         |
|------------|-------|-------|-------|-------|-------|-------|-------|-------|-------|-------|-------|-------|-------|-------|-------|-------|-------|-------|-------|-------|-------|-------|-------|-------|-------|-------|-------|-------|------------|---------|
| Cdkal1     | 1028  | 984   | 926   | 819   | 762   | 810   | 895   | 1252  | 1229  | 1067  | 1045  | 1098  | 1149  | 1166  | 1040  | 907   | 860   | 828   | 810   | 878   | 874   | 1069  | 1165  | 1088  | 1183  | 1339  | 1219  | 1243  | Cdkal1     |         |
| Cdkl1      | 98    | 53    | 66    | 68    | 124   | 124   | 82    | 145   | 154   | 116   | 190   | 118   | 128   | 80    | 104   | 76    | 86    | 59    | 81    | 118   | 103   | 155   | 206   | 109   | 131   | 106   | 107   | 98    | Cdkl1      |         |
| Cdkl2      | 210   | 209   | 158   | 296   | 542   | 316   | 412   | 325   | 394   | 322   | 440   | 137   | 204   | 180   | 274   | 260   | 178   | 373   | 316   | 312   | 397   | 393   | 445   | 261   | 343   | 150   | 119   | 132   | Cdkl2      |         |
| Cdkl3      | 1539  | 1379  | 1087  | 1609  | 1573  | 1690  | 1659  | 1260  | 1124  | 1136  | 1014  | 1206  | 1102  | 1243  | 1630  | 1310  | 1318  | 1510  | 1451  | 1640  | 1549  | 1113  | 1108  | 1019  | 1206  | 908   | 1192  | 1097  | Cdkl3      |         |
| Cdkl4      | 255   | 246   | 234   | 241   | 276   | 232   | 218   | 208   | 248   | 228   | 177   | 191   | 311   | 168   | 342   | 336   | 228   | 227   | 218   | 246   | 216   | 344   | 274   | 176   | 176   | 167   | 160   | 164   | Cdkl4      |         |
| Cdkl5      | 4241  | 4058  | 2358  | 3594  | 3842  | 4338  | 4323  | 2905  | 2479  | 2058  | 1943  | 2140  | 1929  | 2196  | 4509  | 3591  | 2987  | 3975  | 3726  | 4994  | 4757  | 2052  | 2407  | 1950  | 2326  | 1492  | 2429  | 1978  | Cdkl5      |         |
| Cdkn1a     | 2794  | 3080  | 2937  | 3193  | 3144  | 2931  | 2601  | 1183  | 1430  | 1257  | 2123  | 1232  | 1252  | 983   | 2689  | 2970  | 3204  | 3212  | 3013  | 2952  | 2700  | 1340  | 1930  | 1207  | 1219  | 1350  | 986   | 1098  | Cdkn1a     |         |
| Cdkn1b     | 9503  | 8466  | 11592 | 13211 | 12159 | 12965 | 14976 | 10437 | 8978  | 10340 | 9991  | 12019 | 10645 | 14387 | 9941  | 8666  | 11754 | 12715 | 13609 | 13127 | 14715 | 9892  | 8576  | 13108 | 13201 | 13116 | 11904 | 13953 | Cdkn1b     |         |
| Cdkn1c     | 21223 | 22849 | 24579 | 19918 | 16123 | 17986 | 11096 | 24337 | 26595 | 24050 | 44729 | 22615 | 28335 | 22095 | 21803 | 23179 | 22403 | 19387 | 15284 | 14327 | 13729 | 26199 | 37600 | 25715 | 22115 | 21893 | 27054 | 25280 | Cdkn1c     |         |
| Cdkn2a     | 5     | 11    | 12    | 5     | 1     | 12    | 6     | 0     | 0     | 3     | 0     | 1     | 0     | 0     | 2     | 7     | 5     | 19    | 1     | 9     | 0     | 6     | 0     | 1     | 0     | 0     | 1     | 0     | Cdkn2a     |         |
| Cdkn2aipn1 | 3200  | 3038  | 3523  | 3776  | 3028  | 3316  | 3552  | 3747  | 2800  | 2904  | 2965  | 3598  | 3250  | 3792  | 3487  | 3091  | 3435  | 3461  | 3204  | 3618  | 3433  | 3287  | 2763  | 3452  | 3491  | 3683  | 3750  | 3762  | Cdkn2aipn1 |         |
| Cdkn2b     | 44    | 48    | 29    | 37    | 34    | 36    | 29    | 21    | 18    | 12    | 32    | 21    | 11    | 6     | 54    | 42    | 17    | 33    | 17    | 20    | 21    | 5     | 28    | 18    | 0     | 5     | 10    | 5     | Cdkn2b     |         |
| Cdkn2c     | 1022  | 962   | 1056  | 1024  | 814   | 972   | 1141  | 796   | 904   | 784   | 737   | 1025  | 824   | 1096  | 885   | 798   | 1027  | 983   | 1101  | 1056  | 1153  | 642   | 785   | 1069  | 1033  | 1113  | 889   | 996   | Cdkn2c     |         |
| Cdkn2d     | 2345  | 3048  | 2430  | 2685  | 2646  | 2554  | 2455  | 1552  | 1631  | 1448  | 1324  | 1598  | 1495  | 1388  | 2465  | 2641  | 2805  | 2773  | 2956  | 3295  | 2568  | 1318  | 1546  | 1557  | 1531  | 1810  | 1592  | 1423  | Cdkn2d     |         |
| Cdkn3      | 1277  | 1036  | 1325  | 1127  | 729   | 897   | 929   | 487   | 494   | 567   | 569   | 783   | 776   | 845   | 1179  | 1107  | 1139  | 867   | 781   | 1062  | 838   | 319   | 480   | 609   | 488   | 920   | 843   | 828   | Cdkn3      |         |
| Cdnf       | 65    | 56    | 38    | 37    | 39    | 61    | 54    | 50    | 39    | 34    | 43    | 42    | 67    | 42    | 62    | 51    | 60    | 33    | 31    | 61    | 41    | 38    | 45    | 47    | 30    | 37    | 45    | 53    | Cdnf       |         |
| Cdo1       | 3673  | 2699  | 2897  | 2792  | 2408  | 3333  | 2445  | 4924  | 4776  | 4510  | 4705  | 3190  | 4425  | 3962  | 3580  | 3404  | 2445  | 3191  | 2424  | 2528  | 2555  | 4293  | 5489  | 4056  | 3920  | 3608  | 3467  | 4165  | Cdo1       |         |
| Cdon       | 13768 | 12142 | 11272 | 11978 | 10258 | 13593 | 11916 | 13713 | 15627 | 14750 | 16821 | 17955 | 19891 | 17539 | 12286 | 13387 | 10136 | 12172 | 11838 | 11423 | 11950 | 8154  | 14851 | 16535 | 16172 | 11923 | 16580 | 15991 | Cdon       |         |
| Cdpf1      | 558   | 792   | 590   | 604   | 511   | 525   | 523   | 333   | 442   | 421   | 405   | 431   | 432   | 425   | 504   | 659   | 628   | 596   | 528   | 608   | 508   | 376   | 441   | 452   | 322   | 492   | 450   | 394   | Cdpf1      |         |
| Cdr2       | 4254  | 4831  | 4288  | 4397  | 4087  | 4013  | 4069  | 2936  | 2700  | 2481  | 2395  | 2405  | 2963  | 2717  | 4659  | 4432  | 4154  | 3940  | 3935  | 4238  | 3982  | 2702  | 2621  | 2107  | 2440  | 2673  | 2669  | 3059  | Cdr2       |         |
| Cdr2l      | 3227  | 4234  | 4578  | 4360  | 4046  | 3631  | 3677  | 2786  | 2730  | 3341  | 2905  | 3579  | 3299  | 3798  | 3306  | 3636  | 4662  | 4363  | 4352  | 3437  | 3802  | 3761  | 2618  | 3654  | 3734  | 4108  | 3560  | 3762  | Cdr2l      |         |
| Cdr4       | 18    | 12    | 2     | 10    | 7     | 17    | 11    | 18    | 11    | 12    | 26    | 9     | 26    | 4     | 13    | 16    | 6     | 22    | 23    | 8     | 17    | 8     | 18    | 7     | 20    | 9     | 19    | 5     | Cdr4       |         |
| Cds1       | 754   | 588   | 513   | 553   | 709   | 587   | 456   | 432   | 564   | 601   | 440   | 321   | 396   | 284   | 543   | 743   | 563   | 763   | 586   | 491   | 567   | 568   | 663   | 440   | 428   | 258   | 177   | 223   | Cds1       |         |
| Cds2       | 13455 | 14176 | 12476 | 17458 | 19477 | 17033 | 16554 | 10003 | 10387 | 11105 | 10666 | 10453 | 10142 | 9903  | 13580 | 13769 | 15308 | 18359 | 18343 | 15439 | 17465 | 12221 | 9716  | 10363 | 12641 | 7145  | 9770  | 9131  | Cds2       |         |
| Cdsn       | 5     | 12    | 13    | 8     | 20    | 6     | 9     | 4     | 12    | 3     | 1     | 7     | 5     | 2     | 8     | 9     | 10    | 17    | 7     | 10    | 6     | 2     | 5     | 1     | 2     | 7     | 7     | 0     | Cdsn       |         |
| Cdt1       | 2050  | 2389  | 2947  | 2478  | 1684  | 1768  | 1773  | 1320  | 1598  | 1528  | 1678  | 2499  | 1884  | 2254  | 1609  | 2170  | 2736  | 2140  | 2244  | 1540  | 1775  | 1332  | 1453  | 2040  | 1559  | 3499  | 2076  | 2293  | Cdt1       |         |
| Cdv3       | 20362 | 16848 | 20907 | 18165 | 16278 | 16929 | 19023 | 20290 | 17994 | 17949 | 18866 | 23076 | 21430 | 23428 | 19460 | 17987 | 19200 | 17649 | 17386 | 17750 | 17388 | 17739 | 18215 | 20314 | 19105 | 26659 | 23372 | 26248 | Cdv3       |         |
| Cdx1       | 0     | 2     | 3     | 2     | 2     | 2     | 2     | 0     | 0     | 0     | 4     | 0     | 1     | 0     | 1     | 2     | 0     | 1     | 4     | 0     | 1     | 3     | 0     | 1     | 0     | 5     | 1     | 1     | Cdx1       |         |
| Cdx2       | 0     | 1     | 0     | 0     | 0     | 0     | 0     | 0     | 2     | 0     | 0     | 0     | 0     | 0     | 0     | 0     | 0     | 3     | 0     | 0     | 0     | 0     | 1     | 3     | 1     | 0     | 0     | 0     | Cdx2       |         |
| Cdx4       | 0     | 0     | 0     | 0     | 7     | 0     | 0     | 0     | 0     | 0     | 0     | 0     | 0     | 0     | 0     | 0     | 0     | 0     | 0     | 0     | 0     | 2     | 0     | 0     | 0     | 0     | 0     | 0     | Cdx4       |         |
| Cdyl       | 1498  | 1294  | 1854  | 1620  | 1447  | 1474  | 1399  | 1144  | 1270  | 1233  | 1416  | 1551  | 1572  | 1424  | 1321  | 1504  | 1679  | 1469  | 1637  | 1186  | 1378  | 1108  | 1434  | 1433  | 1141  | 1791  | 1364  | 1622  | Cdyl       |         |
| Cdyl2      | 194   | 195   | 147   | 174   | 283   | 236   | 213   | 324   | 381   | 359   | 374   | 277   | 291   | 247   | 160   | 212   | 129   | 200   | 234   | 205   | 224   | 224   | 357   | 321   | 291   | 145   | 273   | 235   | Cdyl2      |         |
| Ceacam1    | 36    | 36    | 45    | 40    | 44    | 55    | 60    | 57    | 68    | 65    | 110   | 61    | 70    | 45    | 50    | 58    | 59    | 37    | 48    | 44    | 58    | 70    | 93    | 63    | 73    | 86    | 72    | 65    | Ceacam1    |         |
| Ceacam10   | 5     | 4     | 4     | 6     | 1     | 0     | 0     | 1     | 2     | 0     | 4     | 4     | 1     | 3     | 3     | 6     | 0     | 2     | 1     | 1     | 0     | 5     | 5     | 7     | 1     | 13    | 0     | 4     | Ceacam10   |         |
| Ceacam11   | 0     | 0     | 0     | 0     | 0     | 0     | 0     | 0     | 16    | 0     | 0     | 0     | 0     | 1     | 0     | 0     | 0     | 0     | 0     | 0     | 0     | 0     | 5     | 0     | 0     | 0     | 0     | 0     | Ceacam11   |         |
| Ceacam12   | 0     | 0     | 0     | 0     | 0     | 0     | 0     | 0     | 11    | 0     | 0     | 0     | 0     | 0     | 0     | 0     | 0     | 0     | 0     | 0     | 0     | 0     | 0     | 0     | 0     | 0     | 0     | 0     | Ceacam12   |         |
| Ceacam13   | 0     | 0     | 0     | 0     | 0     | 0     | 0     | 0     | 0     | 0     | 0     | 0     | 0     | 0     | 0     | 0     | 0     | 0     | 0     | 0     | 0     | 0     | 1     | 0     | 0     | 0     | 0     | 0     | Ceacam13   |         |
| Ceacam14   | 0     | 0     | 0     | 0     | 0     | 0     | 0     | 0     | 19    | 0     | 0     | 0     | 0     | 0     | 0     | 0     | 0     | 0     | 0     | 0     | 0     | 0     | 4     | 0     | 0     | 0     | 0     | 0     | Ceacam14   |         |
| Ceacam15   | 0     | 0     | 0     | 0     | 1     | 0     | 0     | 0     | 1     | 0     | 0     | 0     | 0     | 0     | 2     | 0     | 0     | 0     | 0     | 0     | 0     | 0     | 0     | 0     | 0     | 1     | 0     | 0     | Ceacam15   |         |
| Ceacam16   | 0     | 0     | 0     | 0     | 0     | 0     | 0     | 0     | 0     | 0     | 0     | 0     | 0     | 1     | 0     | 0     | 0     | 0     | 0     | 0     | 0     | 0     | 2     | 4     | 0     | 0     | 0     | 0     | Ceacam16   |         |
| Ceacam18   | 7     | 5     | 4     | 4     | 3     | 0     | 2     | 0     | 1     | 0     | 4     | 3     | 0     | 1     | 1     | 9     | 3     | 4     | 5     | 9     | 4     | 2     | 3     | 0     | 2     | 3     | 1     | 1     | Ceacam18   |         |
| Ceacam19   | 0     | 1     | 0     | 0     | 0     | 0     | 0     | 0     | 6     | 5     | 1     | 0     | 0     | 0     | 0     | 0     | 0     | 0     | 0     | 0     | 0     | 0     | 9     | 1     | 0     | 0     | 0     | 0     | Ceacam19   |         |
| Ceacam2    | 0     | 0     | 0     | 0     | 0     | 1     | 0     | 1     | 0     | 0     | 0     | 0     | 0     | 0     | 1     | 0     | 1     | 0     | 0     | 1     | 0     | 0     | 1     | 0     | 0     | 1     | 0     | 0     | Ceacam2    |         |
| Ceacam20   | 0     | 0     | 0     | 0     | 0     | 0     | 0     | 0     | 0     | 0     | 0     | 0     | 0     | 0     | 0     | 0     | 0     | 0     | 0     | 0     | 1     | 0     | 0     | 0     | 0     | 0     | 0     | 0     | Ceacam20   |         |
| Ceacam3    | 0     | 0     | 0     | 0     | 2     | 0     | 0     | 1     | 9     | 4     | 1     | 0     | 1     | 2     | 4     | 2     | 0     | 5     | 0     | 0     | 0     | 2     | 1     | 6     | 1     | 1     | 1     | 0     | 0          | Ceacam3 |
| Ceacam5    | 0     | 0     | 0     | 0     | 0     | 0     | 0     | 0     | 11    | 0     | 0     | 0     | 0     | 0     | 0     | 0     | 0     | 0     | 0     | 0     | 0     | 2     | 0     | 0     | 0     | 0     | 0     | 0     | Ceacam5    |         |
| Ceacam9    | 0     | 0     | 0     | 0     | 2     | 0     | 0     | 0     | 0     | 0     | 0     | 0     | 0     | 0     | 0     | 0     | 0     | 0     | 0     | 0     | 0     | 2     | 0     | 0     | 2     | 0     | 0     | 0     | Ceacam9    |         |
| Cebpa      | 495   | 460   | 538   | 496   | 360   | 388   | 284   | 210   | 328   | 242   | 227   | 139   | 129   | 84    | 298   | 503   | 532   | 519   | 415   | 391   | 326   | 119   | 414   | 197   | 125   | 202   | 102   | 125   | Cebpa      |         |
| Cebpb      | 76    | 81    | 70    | 57    | 47    | 46    | 40    | 72    | 87    | 102   | 105   | 51    | 56    | 38    | 46    | 74    | 101   | 74    | 42    | 46    | 46    | 40    | 87    | 72    | 49    | 61    | 24    | 21    | Cebpb      |         |
| Cebpd      | 63    | 49    | 46    | 51    | 57    | 62    | 22    | 96    | 114   | 78    | 108   | 49    | 59    | 40    | 51    | 47    | 44    | 32    | 64    | 66    | 34    | 74    | 102   | 86    | 74    | 73    | 81    | 53    | Cebpd      |         |
| Cebpe      | 1     | 1     | 3     | 2     | 0     | 5     | 0     | 2     | 1     | 13    | 5     | 4     | 0     | 1     | 1     | 0     | 0     | 3     | 3     | 0     | 4     | 0     | 4     | 5     | 12    | 3     | 1     | 2     | Cebpe      |         |
| Cebpg      | 7138  | 6544  | 9103  | 8586  | 7852  | 7740  | 8336  | 7331  | 6051  | 6606  | 6424  | 7399  | 6471  | 7620  | 7089  | 7061  | 8867  | 8249  | 8445  | 8049  | 8164  | 5905  | 5831  | 7484  | 7365  | 8681  | 7340  | 7672  | Cebpg      |         |
| Cebpz      | 6846  | 6329  | 6346  | 5414  | 5009  | 5459  | 6330  | 7135  | 6119  | 5971  | 5573  | 6649  | 6143  | 6779  | 7146  | 6208  | 5789  | 5702  | 5594  | 6459  | 5790  | 5822  | 6111  | 6393  | 6137  | 7166  | 6643  | 7096  | Cebpz      |         |
| Cebzsoz    |       |       |       |       |       |       |       |       |       |       |       |       |       |       |       |       |       |       |       |       |       |       |       |       |       |       |       |       |            |         |

|          |       |       |       |       |       |       |       |       |       |       |       |       |       |       |       |       |       |       |       |       |       |       |       |       |       |       |       |       |          |
|----------|-------|-------|-------|-------|-------|-------|-------|-------|-------|-------|-------|-------|-------|-------|-------|-------|-------|-------|-------|-------|-------|-------|-------|-------|-------|-------|-------|-------|----------|
| Cenpj    | 5187  | 4820  | 4615  | 4162  | 3318  | 3860  | 4375  | 3131  | 2640  | 2580  | 2142  | 3220  | 2565  | 3458  | 5196  | 4533  | 4212  | 3919  | 3654  | 4729  | 4169  | 2154  | 2308  | 3035  | 2598  | 3236  | 3385  | 3353  | Cenpj    |
| Cenpk    | 1902  | 1168  | 1801  | 1292  | 972   | 1436  | 1581  | 1768  | 1579  | 1433  | 1426  | 1991  | 1735  | 2382  | 1753  | 1592  | 1465  | 1120  | 1286  | 1752  | 1342  | 1066  | 1452  | 1811  | 1474  | 2552  | 2095  | 2256  | Cenpk    |
| Cenpl    | 2914  | 2347  | 2327  | 2139  | 1810  | 2076  | 2283  | 1890  | 1648  | 1530  | 1335  | 2043  | 1817  | 2256  | 2516  | 2427  | 2138  | 2076  | 2033  | 2463  | 2115  | 1265  | 1589  | 1843  | 1646  | 2597  | 2436  | 2403  | Cenpl    |
| Cenpm    | 775   | 899   | 734   | 648   | 510   | 643   | 629   | 563   | 638   | 486   | 523   | 881   | 797   | 822   | 589   | 712   | 800   | 558   | 634   | 675   | 612   | 393   | 559   | 772   | 657   | 1128  | 881   | 961   | Cenpm    |
| Cenpn    | 2211  | 1863  | 1950  | 1505  | 1271  | 1456  | 1614  | 1790  | 1830  | 1740  | 1532  | 2349  | 2065  | 2450  | 1998  | 1786  | 1847  | 1450  | 1547  | 1602  | 1447  | 1242  | 1542  | 1986  | 1681  | 2772  | 2468  | 2540  | Cenpn    |
| Cenpo    | 1544  | 1390  | 1308  | 1212  | 922   | 1174  | 1129  | 1420  | 1250  | 1170  | 1262  | 1433  | 1369  | 1479  | 1412  | 1289  | 1207  | 1044  | 1174  | 1326  | 1183  | 1014  | 1205  | 1259  | 1276  | 1438  | 1633  | 1525  | Cenpo    |
| Cenpp    | 1480  | 1225  | 1194  | 1067  | 725   | 845   | 1161  | 730   | 630   | 494   | 484   | 818   | 793   | 900   | 1407  | 1379  | 1213  | 855   | 976   | 1227  | 1003  | 419   | 499   | 710   | 582   | 1024  | 851   | 978   | Cenpp    |
| Cenpq    | 2271  | 1456  | 2010  | 1548  | 1174  | 1575  | 1757  | 1961  | 1756  | 1446  | 1337  | 2058  | 1772  | 2288  | 2054  | 1808  | 1607  | 1247  | 1600  | 2005  | 1457  | 1215  | 1464  | 1763  | 1468  | 2510  | 2166  | 2404  | Cenpq    |
| Cenps    | 414   | 381   | 541   | 409   | 394   | 452   | 386   | 679   | 819   | 798   | 681   | 989   | 1012  | 995   | 385   | 390   | 489   | 348   | 471   | 449   | 333   | 521   | 772   | 949   | 743   | 1311  | 1169  | 1030  | Cenps    |
| Cenpt    | 3222  | 3703  | 3694  | 3658  | 3240  | 3121  | 3193  | 3251  | 3392  | 3643  | 3524  | 4060  | 4073  | 4054  | 3055  | 3314  | 3489  | 3442  | 3288  | 2938  | 3085  | 3589  | 3082  | 3868  | 3868  | 4442  | 4215  | 4086  | Cenpt    |
| Cenpu    | 2584  | 2447  | 2337  | 2021  | 1187  | 1665  | 1932  | 1130  | 1032  | 899   | 802   | 1382  | 1311  | 1503  | 2531  | 2229  | 2103  | 1717  | 1700  | 2023  | 1770  | 695   | 830   | 1265  | 1064  | 1681  | 1508  | 1505  | Cenpu    |
| Cenpv    | 1502  | 1681  | 1569  | 1691  | 1793  | 1845  | 2168  | 1728  | 1874  | 1911  | 1709  | 2018  | 1681  | 2333  | 1490  | 1071  | 1779  | 1742  | 2021  | 1988  | 2011  | 1693  | 1702  | 2416  | 2285  | 2323  | 2186  | 2296  | Cenpv    |
| Cenpw    | 1425  | 938   | 1655  | 1104  | 714   | 870   | 1272  | 1092  | 840   | 754   | 761   | 1458  | 1051  | 1632  | 1311  | 1182  | 1270  | 797   | 854   | 1263  | 1004  | 735   | 933   | 1200  | 935   | 1788  | 1549  | 1869  | Cenpw    |
| Cenpx    | 1700  | 2048  | 1841  | 1757  | 1454  | 1442  | 1645  | 1159  | 1224  | 1145  | 1236  | 1325  | 1212  | 1467  | 1545  | 1710  | 1877  | 1532  | 1657  | 1664  | 1772  | 1036  | 1264  | 1397  | 1280  | 1535  | 1388  | 1480  | Cenpx    |
| Cep104   | 2668  | 3175  | 2735  | 3009  | 3271  | 3140  | 2866  | 2709  | 3078  | 3285  | 2851  | 3539  | 3251  | 3083  | 2595  | 2867  | 2853  | 3214  | 3326  | 2738  | 2931  | 3227  | 2915  | 3312  | 3506  | 2992  | 3175  | 3348  | Cep104   |
| Cep112   | 1509  | 1214  | 1732  | 1303  | 1104  | 1335  | 1256  | 1418  | 1206  | 1101  | 1222  | 1575  | 1430  | 1723  | 1524  | 1326  | 1335  | 1080  | 1150  | 1593  | 1129  | 1243  | 1369  | 1415  | 1412  | 1486  | 1758  | 1680  | Cep112   |
| Cep120   | 7170  | 7545  | 7050  | 7907  | 8489  | 7951  | 8548  | 7498  | 6698  | 7395  | 6545  | 7215  | 6578  | 7488  | 7780  | 6893  | 7365  | 7650  | 7911  | 7731  | 8384  | 7536  | 6515  | 6925  | 7371  | 6179  | 6887  | 7157  | Cep120   |
| Cep126   | 2673  | 2432  | 2091  | 2604  | 2422  | 2564  | 2452  | 1601  | 1332  | 1375  | 1302  | 1212  | 1600  | 1334  | 2763  | 2706  | 2493  | 2498  | 2605  | 2607  | 2611  | 1532  | 1340  | 1220  | 1292  | 1115  | 1457  | 1449  | Cep126   |
| Cep128   | 2280  | 2191  | 2245  | 1917  | 1711  | 1781  | 2065  | 2031  | 1622  | 1643  | 1463  | 2209  | 1852  | 2427  | 2201  | 1942  | 2088  | 1876  | 1945  | 2154  | 1921  | 1414  | 1665  | 1803  | 1677  | 2142  | 2328  | 2083  | Cep128   |
| Cep131   | 3791  | 4884  | 6150  | 5899  | 4733  | 4775  | 4474  | 2657  | 3232  | 3986  | 3607  | 4574  | 3877  | 4358  | 3666  | 4388  | 6197  | 5222  | 5340  | 4045  | 4654  | 3218  | 2897  | 4821  | 4108  | 5087  | 4357  | 4365  | Cep131   |
| Cep135   | 2369  | 2005  | 1664  | 1674  | 1763  | 1959  | 2045  | 2920  | 2959  | 2505  | 2570  | 3048  | 3106  | 3253  | 2094  | 2076  | 1775  | 1599  | 1794  | 2235  | 1964  | 2070  | 2526  | 2624  | 2498  | 2614  | 3273  | 3045  | Cep135   |
| Cep152   | 4109  | 4155  | 2502  | 3173  | 2167  | 2629  | 2894  | 2437  | 2136  | 1886  | 1912  | 2199  | 2115  | 2183  | 3600  | 4097  | 2702  | 2677  | 2223  | 3281  | 2788  | 1226  | 2090  | 2145  | 1679  | 2318  | 2494  | 2068  | Cep152   |
| Cep162   | 5765  | 6102  | 4310  | 4631  | 4485  | 5026  | 5152  | 4096  | 3599  | 2991  | 3014  | 3696  | 3444  | 3624  | 5930  | 5939  | 4485  | 4540  | 4393  | 5811  | 5107  | 2964  | 3410  | 2994  | 3236  | 2617  | 3866  | 3510  | Cep162   |
| Cep164   | 5740  | 7007  | 7534  | 7571  | 6792  | 6802  | 6587  | 2682  | 3540  | 3700  | 3839  | 4324  | 4123  | 3928  | 5333  | 6499  | 7497  | 7381  | 7115  | 5443  | 6672  | 3288  | 3372  | 3805  | 3847  | 3506  | 3864  | 3793  | Cep164   |
| Cep170   | 16137 | 14906 | 12123 | 17350 | 21164 | 22139 | 22969 | 33556 | 28541 | 26324 | 25390 | 25470 | 23170 | 27042 | 18407 | 14651 | 15592 | 17621 | 19716 | 23056 | 23054 | 28899 | 26903 | 22823 | 30216 | 15570 | 25104 | 23346 | Cep170   |
| Cep170b  | 474   | 1199  | 536   | 1485  | 463   | 466   | 885   | 319   | 981   | 345   | 167   | 381   | 633   | 241   | 479   | 940   | 1263  | 708   | 596   | 451   | 553   | 404   | 230   | 668   | 571   | 154   | 550   | 319   | Cep170b  |
| Cep19    | 2025  | 1881  | 1944  | 2054  | 1843  | 1866  | 2044  | 1988  | 1716  | 1674  | 1554  | 1743  | 1677  | 1912  | 2206  | 1828  | 2163  | 2085  | 1889  | 2468  | 2069  | 1861  | 1676  | 1754  | 1708  | 1815  | 1863  | 1844  | Cep19    |
| Cep192   | 15503 | 13659 | 7785  | 9532  | 8789  | 10918 | 11512 | 8692  | 7662  | 6022  | 6504  | 7878  | 7011  | 7994  | 14486 | 13582 | 8890  | 9414  | 8480  | 12533 | 11157 | 5133  | 6921  | 5712  | 6386  | 5395  | 8938  | 7605  | Cep192   |
| Cep20    | 2590  | 1995  | 2485  | 2283  | 2255  | 2397  | 2671  | 3926  | 3573  | 3485  | 3240  | 3764  | 3485  | 4010  | 2786  | 2290  | 2218  | 2213  | 2261  | 2815  | 2475  | 3474  | 3721  | 3675  | 3629  | 4102  | 3672  | 3999  | Cep20    |
| Cep250   | 5978  | 6222  | 7403  | 7457  | 7841  | 7536  | 7061  | 7310  | 8539  | 10610 | 10130 | 10862 | 10501 | 11127 | 5387  | 6724  | 7379  | 7236  | 7516  | 6048  | 6976  | 8407  | 7591  | 10893 | 10340 | 7840  | 11011 | 10021 | Cep250   |
| Cep290   | 4045  | 3032  | 2210  | 2976  | 2884  | 3831  | 3617  | 3729  | 3238  | 2495  | 2292  | 2868  | 2790  | 3075  | 4547  | 3662  | 2484  | 2829  | 2822  | 4427  | 3572  | 2075  | 3078  | 2352  | 2540  | 1824  | 3177  | 2593  | Cep290   |
| Cep295   | 9220  | 7613  | 5067  | 6403  | 6256  | 7810  | 8035  | 9873  | 8579  | 6588  | 6781  | 8270  | 7843  | 8420  | 9115  | 8028  | 5471  | 6298  | 5951  | 8365  | 7742  | 6278  | 7802  | 6289  | 7317  | 5624  | 8671  | 7408  | Cep295   |
| Cep295nl | 16    | 21    | 13    | 14    | 12    | 8     | 7     | 35    | 34    | 6     | 37    | 11    | 16    | 12    | 9     | 18    | 26    | 9     | 10    | 12    | 25    | 11    | 13    | 22    | 22    | 15    | 19    | 25    | Cep295nl |
| Cep350   | 10638 | 9673  | 5477  | 7444  | 7621  | 10271 | 9231  | 10022 | 9387  | 7568  | 8941  | 7467  | 7787  | 7986  | 10544 | 10333 | 5937  | 7086  | 6650  | 10379 | 9908  | 6682  | 8875  | 5829  | 8031  | 4673  | 8656  | 6773  | Cep350   |
| Cep41    | 1066  | 1016  | 1013  | 1011  | 1159  | 1067  | 1269  | 2044  | 1980  | 1931  | 2302  | 2095  | 2108  | 2066  | 1068  | 917   | 1145  | 971   | 1124  | 1118  | 1170  | 1903  | 2203  | 2006  | 1994  | 2098  | 2173  | 2302  | Cep41    |
| Cep43    | 3496  | 2817  | 3275  | 2662  | 2716  | 2851  | 2932  | 3645  | 3088  | 2720  | 2735  | 3296  | 3515  | 3460  | 3351  | 3235  | 2745  | 2759  | 2710  | 3303  | 2785  | 2891  | 2915  | 2951  | 2824  | 3642  | 3500  | 3783  | Cep43    |
| Cep44    | 3129  | 2717  | 2568  | 2707  | 2537  | 2716  | 2860  | 2488  | 2175  | 1923  | 2101  | 2056  | 2081  | 2225  | 2913  | 2914  | 2629  | 2598  | 2556  | 3305  | 2891  | 1873  | 2051  | 2089  | 2092  | 2124  | 2298  | 2082  | Cep44    |
| Cep55    | 4193  | 3820  | 4584  | 3270  | 2425  | 2873  | 3339  | 3154  | 2661  | 2615  | 2123  | 3908  | 3151  | 4169  | 3894  | 3509  | 3672  | 2873  | 2887  | 3658  | 2917  | 1995  | 2325  | 3230  | 2786  | 4675  | 4040  | 4243  | Cep55    |
| Cep57    | 5469  | 4336  | 4818  | 4439  | 4014  | 4458  | 5197  | 5357  | 4765  | 4125  | 4319  | 5798  | 5077  | 6247  | 5428  | 4543  | 4558  | 4040  | 4209  | 5532  | 4400  | 4264  | 4401  | 4764  | 4560  | 6313  | 5933  | 5993  | Cep57    |
| Cep5711  | 624   | 600   | 584   | 625   | 511   | 513   | 552   | 1247  | 1080  | 988   | 1085  | 1213  | 1188  | 1199  | 686   | 521   | 540   | 497   | 583   | 657   | 563   | 922   | 1186  | 1135  | 935   | 1198  | 1218  | 1245  | Cep5711  |
| Cep63    | 1884  | 1635  | 1760  | 1929  | 1879  | 1795  | 1990  | 3577  | 3253  | 3566  | 3410  | 3877  | 3632  | 4070  | 1842  | 1699  | 1976  | 1702  | 1880  | 1850  | 1952  | 3347  | 3178  | 3583  | 3477  | 3834  | 3972  | 3830  | Cep63    |
| Cep68    | 5021  | 4122  | 4330  | 3999  | 4275  | 4516  | 4645  | 5699  | 5694  | 5187  | 5343  | 5910  | 5968  | 6149  | 4631  | 4261  | 4239  | 4080  | 4284  | 4230  | 4414  | 4995  | 5320  | 5586  | 5409  | 5535  | 5879  | 5878  | Cep68    |
| Cep70    | 3723  | 2853  | 2844  | 3192  | 3530  | 3763  | 4046  | 4557  | 3892  | 3690  | 3286  | 3645  | 3307  | 3964  | 3729  | 3029  | 2934  | 3143  | 3300  | 4330  | 3909  | 3883  | 3544  | 3408  | 3812  | 3491  | 3585  | 3434  | Cep70    |
| Cep72    | 1867  | 1692  | 1666  | 1476  | 1459  | 1492  | 1505  | 2216  | 2253  | 1997  | 1959  | 2787  | 2411  | 2639  | 1975  | 1632  | 1628  | 1274  | 1400  | 1685  | 1350  | 1733  | 2034  | 2055  | 1900  | 2391  | 2726  | 2613  | Cep72    |
| Cep76    | 2877  | 2642  | 3018  | 2775  | 2347  | 2603  | 2808  | 2407  | 2029  | 1943  | 1906  | 2881  | 2652  | 3002  | 2111  | 2537  | 2756  | 2511  | 2571  | 2678  | 2586  | 1892  | 1817  | 2446  | 2361  | 3020  | 2932  | 3129  | Cep76    |
| Cep78    | 5376  | 5269  | 4473  | 5106  | 4765  | 5257  | 5707  | 3910  | 3305  | 3415  | 3073  | 4100  | 3800  | 4410  | 5156  | 4644  | 4955  | 4673  | 4938  | 5     |       |       |       |       |       |       |       |       |          |

|          |       |       |       |       |       |       |       |       |       |       |       |       |       |       |       |       |       |       |       |       |       |       |       |       |       |       |       |       |          |
|----------|-------|-------|-------|-------|-------|-------|-------|-------|-------|-------|-------|-------|-------|-------|-------|-------|-------|-------|-------|-------|-------|-------|-------|-------|-------|-------|-------|-------|----------|
| Cetn2    | 4295  | 3712  | 4226  | 3605  | 3371  | 3510  | 4261  | 3538  | 3011  | 2781  | 2597  | 3356  | 3128  | 3670  | 4515  | 4231  | 4078  | 3552  | 3532  | 4773  | 3799  | 2801  | 3079  | 3139  | 2794  | 3848  | 3636  | 3888  | Cetn2    |
| Cetn3    | 5892  | 4622  | 6205  | 6237  | 6070  | 6384  | 8042  | 9541  | 8372  | 7835  | 7534  | 8978  | 8143  | 10093 | 7052  | 5371  | 5997  | 5812  | 6901  | 8242  | 7660  | 7935  | 8228  | 9260  | 8784  | 9990  | 9166  | 10842 | Cetn3    |
| Cetn4    | 168   | 131   | 154   | 157   | 157   | 142   | 169   | 161   | 150   | 115   | 190   | 113   | 171   | 151   | 165   | 147   | 118   | 141   | 129   | 145   | 125   | 157   | 194   | 182   | 126   | 177   | 124   | 159   | Cetn4    |
| Cfap100  | 189   | 234   | 179   | 363   | 510   | 440   | 345   | 420   | 414   | 505   | 435   | 398   | 378   | 309   | 203   | 214   | 280   | 351   | 444   | 408   | 449   | 505   | 401   | 381   | 449   | 245   | 404   | 328   | Cfap100  |
| Cfap126  | 126   | 181   | 108   | 88    | 151   | 162   | 93    | 170   | 190   | 214   | 208   | 263   | 345   | 160   | 148   | 170   | 105   | 118   | 93    | 175   | 103   | 182   | 379   | 173   | 193   | 186   | 194   | 132   | Cfap126  |
| Cfap157  | 43    | 71    | 33    | 82    | 77    | 78    | 86    | 34    | 29    | 43    | 19    | 26    | 41    | 26    | 45    | 63    | 71    | 97    | 74    | 58    | 90    | 32    | 36    | 29    | 15    | 13    | 21    | 17    | Cfap157  |
| Cfap161  | 36    | 48    | 46    | 23    | 47    | 38    | 23    | 20    | 35    | 30    | 20    | 31    | 41    | 17    | 41    | 65    | 17    | 41    | 21    | 56    | 29    | 30    | 41    | 37    | 38    | 24    | 22    | 11    | Cfap161  |
| Cfap20   | 5868  | 6439  | 5319  | 6209  | 4988  | 5309  | 6014  | 3711  | 3612  | 3729  | 3662  | 4178  | 3625  | 3951  | 5942  | 5412  | 5244  | 5702  | 5293  | 5675  | 5574  | 3798  | 3719  | 4124  | 3840  | 4240  | 4045  | 4029  | Cfap20   |
| Cfap206  | 448   | 601   | 388   | 448   | 385   | 356   | 333   | 205   | 182   | 172   | 125   | 162   | 215   | 116   | 520   | 626   | 450   | 383   | 330   | 439   | 320   | 159   | 282   | 105   | 125   | 152   | 151   | 101   | Cfap206  |
| Cfap20dc | 756   | 663   | 631   | 622   | 443   | 544   | 594   | 683   | 714   | 622   | 658   | 817   | 674   | 769   | 683   | 660   | 621   | 518   | 534   | 583   | 580   | 486   | 634   | 757   | 623   | 1002  | 683   | 793   | Cfap20dc |
| Cfap221  | 39    | 34    | 38    | 33    | 30    | 17    | 21    | 33    | 21    | 26    | 20    | 33    | 42    | 23    | 33    | 44    | 36    | 36    | 27    | 19    | 32    | 20    | 43    | 7     | 13    | 16    | 6     | 17    | Cfap221  |
| Cfap298  | 619   | 733   | 751   | 658   | 755   | 713   | 704   | 918   | 1042  | 1192  | 1036  | 1203  | 1109  | 1208  | 667   | 619   | 674   | 657   | 716   | 799   | 762   | 882   | 1107  | 1146  | 1092  | 1402  | 1332  | 1158  | Cfap298  |
| Cfap299  | 20    | 16    | 9     | 14    | 31    | 24    | 26    | 24    | 29    | 19    | 24    | 25    | 26    | 12    | 22    | 23    | 24    | 13    | 24    | 28    | 28    | 20    | 29    | 26    | 23    | 20    | 17    | 13    | Cfap299  |
| Cfap300  | 2114  | 1741  | 1673  | 1861  | 1895  | 1773  | 2085  | 1286  | 1200  | 1051  | 1064  | 1132  | 1185  | 1006  | 2153  | 1967  | 1679  | 2052  | 1877  | 2108  | 2044  | 1297  | 1271  | 1079  | 1044  | 1130  | 1123  | 1216  | Cfap300  |
| Cfap36   | 5592  | 5142  | 5321  | 5610  | 5348  | 5031  | 6272  | 4485  | 3570  | 3547  | 3259  | 3755  | 3624  | 3995  | 6140  | 5224  | 5650  | 5461  | 4948  | 6524  | 5890  | 4149  | 3743  | 3754  | 3764  | 4010  | 3720  | 3944  | Cfap36   |
| Cfap410  | 1959  | 2354  | 1901  | 1906  | 1721  | 1752  | 1721  | 1097  | 1308  | 1275  | 1153  | 1269  | 1377  | 1200  | 1850  | 2047  | 1949  | 1778  | 1792  | 1745  | 1700  | 1170  | 1236  | 1279  | 1200  | 1341  | 1299  | 1277  | Cfap410  |
| Cfap43   | 129   | 159   | 35    | 108   | 306   | 239   | 150   | 180   | 354   | 269   | 220   | 266   | 335   | 83    | 160   | 291   | 48    | 133   | 162   | 222   | 227   | 336   | 570   | 92    | 199   | 51    | 74    | 52    | Cfap43   |
| Cfap44   | 847   | 987   | 327   | 617   | 1064  | 1160  | 836   | 1122  | 1091  | 853   | 706   | 690   | 1055  | 485   | 1096  | 1264  | 402   | 665   | 703   | 1255  | 1041  | 764   | 1583  | 385   | 671   | 170   | 504   | 360   | Cfap44   |
| Cfap45   | 475   | 447   | 420   | 513   | 412   | 315   | 391   | 115   | 141   | 183   | 132   | 163   | 171   | 121   | 439   | 514   | 416   | 393   | 357   | 385   | 357   | 160   | 219   | 144   | 111   | 140   | 143   | 109   | Cfap45   |
| Cfap46   | 185   | 258   | 135   | 195   | 349   | 244   | 198   | 231   | 297   | 302   | 256   | 287   | 256   | 218   | 223   | 283   | 188   | 216   | 252   | 286   | 284   | 309   | 357   | 181   | 296   | 98    | 155   | 154   | Cfap46   |
| Cfap47   | 126   | 140   | 88    | 105   | 231   | 223   | 189   | 272   | 252   | 184   | 176   | 186   | 285   | 151   | 220   | 199   | 105   | 135   | 78    | 206   | 197   | 224   | 307   | 154   | 193   | 86    | 202   | 132   | Cfap47   |
| Cfap52   | 168   | 256   | 135   | 167   | 216   | 204   | 142   | 161   | 130   | 123   | 138   | 173   | 226   | 84    | 212   | 266   | 155   | 166   | 150   | 200   | 179   | 175   | 302   | 94    | 78    | 142   | 102   | 125   | Cfap52   |
| Cfap53   | 92    | 115   | 96    | 175   | 144   | 136   | 154   | 73    | 69    | 63    | 74    | 68    | 92    | 71    | 138   | 103   | 88    | 167   | 140   | 114   | 147   | 99    | 106   | 60    | 79    | 69    | 45    | 44    | Cfap53   |
| Cfap54   | 549   | 666   | 332   | 568   | 607   | 685   | 613   | 473   | 422   | 349   | 304   | 355   | 439   | 255   | 686   | 656   | 399   | 470   | 491   | 806   | 677   | 393   | 583   | 218   | 352   | 173   | 341   | 255   | Cfap54   |
| Cfap57   | 103   | 161   | 141   | 97    | 169   | 127   | 117   | 201   | 184   | 187   | 188   | 169   | 249   | 146   | 144   | 171   | 102   | 147   | 159   | 151   | 139   | 229   | 213   | 112   | 167   | 143   | 141   | 204   | Cfap57   |
| Cfap58   | 30    | 48    | 22    | 66    | 44    | 47    | 47    | 46    | 30    | 32    | 32    | 49    | 41    | 18    | 47    | 40    | 74    | 52    | 37    | 65    | 43    | 42    | 40    | 27    | 27    | 23    | 16    | 31    | Cfap58   |
| Cfap61   | 131   | 198   | 150   | 152   | 156   | 162   | 131   | 144   | 119   | 131   | 117   | 116   | 129   | 71    | 202   | 207   | 161   | 157   | 213   | 149   | 145   | 184   | 196   | 129   | 92    | 76    | 93    | 100   | Cfap61   |
| Cfap65   | 213   | 336   | 136   | 270   | 488   | 305   | 359   | 374   | 410   | 429   | 352   | 507   | 643   | 287   | 306   | 530   | 271   | 297   | 402   | 402   | 328   | 536   | 741   | 275   | 369   | 210   | 339   | 275   | Cfap65   |
| Cfap69   | 3712  | 3143  | 2991  | 3728  | 3948  | 4022  | 4369  | 1371  | 1192  | 1292  | 1224  | 1270  | 1402  | 1128  | 3948  | 3704  | 3174  | 3800  | 3663  | 4187  | 4305  | 1379  | 1445  | 987   | 1079  | 803   | 1039  | 1113  | Cfap69   |
| Cfap70   | 324   | 295   | 248   | 253   | 277   | 303   | 352   | 154   | 136   | 91    | 114   | 88    | 144   | 96    | 287   | 349   | 183   | 302   | 316   | 288   | 327   | 147   | 184   | 108   | 120   | 75    | 94    | 107   | Cfap70   |
| Cfap73   | 3     | 5     | 0     | 8     | 11    | 4     | 7     | 11    | 18    | 21    | 12    | 25    | 8     | 12    | 9     | 13    | 2     | 7     | 2     | 9     | 5     | 28    | 31    | 11    | 14    | 20    | 14    | 18    | Cfap73   |
| Cfap74   | 442   | 473   | 396   | 493   | 567   | 465   | 468   | 562   | 600   | 650   | 591   | 797   | 741   | 681   | 463   | 522   | 399   | 431   | 515   | 545   | 462   | 622   | 695   | 583   | 602   | 625   | 788   | 733   | Cfap74   |
| Cfap77   | 174   | 215   | 248   | 219   | 193   | 182   | 125   | 51    | 53    | 61    | 55    | 61    | 82    | 60    | 145   | 159   | 217   | 200   | 199   | 127   | 180   | 69    | 69    | 51    | 62    | 55    | 52    | 50    | Cfap77   |
| Cfap91   | 85    | 107   | 125   | 82    | 101   | 80    | 86    | 123   | 104   | 157   | 122   | 106   | 144   | 98    | 100   | 97    | 102   | 74    | 88    | 69    | 93    | 157   | 248   | 92    | 112   | 110   | 85    | 103   | Cfap91   |
| Cfap97   | 2171  | 1831  | 2045  | 1792  | 1924  | 1991  | 1949  | 3305  | 3009  | 2831  | 2783  | 2790  | 2658  | 2569  | 2345  | 2022  | 1999  | 1895  | 1986  | 2241  | 1959  | 3098  | 3036  | 2708  | 2565  | 2676  | 3030  | 2649  | Cfap97   |
| Cfap97d1 | 1     | 1     | 0     | 7     | 0     | 3     | 1     | 6     | 1     | 0     | 4     | 7     | 0     | 1     | 3     | 2     | 0     | 0     | 1     | 1     | 1     | 0     | 0     | 0     | 0     | 0     | 3     | 0     | Cfap97d1 |
| Cfap97d2 | 61    | 72    | 64    | 77    | 124   | 75    | 103   | 100   | 59    | 96    | 87    | 127   | 110   | 139   | 87    | 69    | 78    | 70    | 91    | 129   | 89    | 77    | 116   | 87    | 107   | 90    | 126   | 123   | Cfap97d2 |
| Cfap99   | 10    | 22    | 17    | 4     | 20    | 7     | 7     | 1     | 8     | 8     | 9     | 7     | 17    | 9     | 7     | 17    | 5     | 7     | 12    | 10    | 8     | 5     | 25    | 17    | 17    | 6     | 2     | 4     | Cfap99   |
| Cfb      | 0     | 0     | 0     | 0     | 0     | 0     | 0     | 0     | 0     | 0     | 0     | 7     | 1     | 1     | 0     | 0     | 6     | 0     | 0     | 2     | 0     | 0     | 0     | 0     | 0     | 2     | 0     | 0     | Cfb      |
| Cfc1     | 5     | 3     | 4     | 3     | 2     | 0     | 0     | 7     | 4     | 4     | 9     | 1     | 0     | 0     | 1     | 1     | 0     | 0     | 0     | 0     | 0     | 0     | 2     | 0     | 1     | 0     | 0     | 1     | Cfc1     |
| Cfd      | 1     | 0     | 0     | 0     | 0     | 0     | 0     | 0     | 0     | 3     | 0     | 0     | 0     | 0     | 0     | 0     | 0     | 0     | 0     | 0     | 0     | 2     | 0     | 0     | 0     | 0     | 0     | 0     | Cfd      |
| Cfdp1    | 10558 | 9539  | 11294 | 9493  | 7761  | 7540  | 9857  | 9318  | 8511  | 7866  | 8624  | 8095  | 8255  | 10294 | 10760 | 10137 | 9812  | 8730  | 8114  | 9883  | 8851  | 7735  | 8517  | 8880  | 7845  | 9936  | 8886  | 10350 | Cfdp1    |
| Cfh      | 600   | 482   | 645   | 673   | 1430  | 1154  | 1017  | 1099  | 1284  | 1117  | 1416  | 949   | 870   | 956   | 684   | 587   | 607   | 1133  | 1051  | 1505  | 1261  | 1708  | 2181  | 1138  | 1262  | 771   | 867   | 786   | Cfh      |
| Cfhr2    | 0     | 1     | 0     | 0     | 3     | 2     | 0     | 0     | 0     | 0     | 2     | 0     | 5     | 2     | 0     | 2     | 0     | 6     | 1     | 4     | 4     | 2     | 3     | 2     | 1     | 4     | 7     | 1     | Cfhr2    |
| Cfhr4    | 0     | 0     | 0     | 0     | 0     | 0     | 1     | 0     | 1     | 0     | 0     | 0     | 0     | 1     | 0     | 1     | 1     | 0     | 1     | 1     | 0     | 0     | 1     | 0     | 0     | 0     | 0     | 0     | Cfhr4    |
| Cfi      | 7     | 17    | 12    | 5     | 9     | 7     | 7     | 11    | 22    | 19    | 21    | 8     | 16    | 9     | 16    | 9     | 13    | 9     | 8     | 5     | 5     | 18    | 19    | 7     | 17    | 7     | 6     | Cfi   |          |
| Cfi1     | 60557 | 74060 | 67946 | 64624 | 61080 | 60887 | 68659 | 61766 | 60556 | 63517 | 58450 | 66749 | 68241 | 78647 | 62621 | 57323 | 67525 | 62055 | 65365 | 69699 | 68116 | 55469 | 59383 | 68768 | 68644 | 74737 | 72430 | 80184 | Cfi1     |
| Cfi2     | 9260  | 6900  | 9156  | 10137 | 10394 | 9736  | 12291 | 13597 | 11044 | 10655 | 11375 | 12250 | 11154 | 13892 | 10315 | 7990  | 8948  | 9118  | 10476 | 10125 | 11566 | 13237 | 11958 | 11988 | 13014 | 13157 | 12529 | 13887 | Cfi2     |
| Cflar    | 1688  | 1424  | 1707  | 1323  | 1422  | 1414  | 1219  | 1756  | 1912  | 1942  | 2359  | 1801  | 2080  | 1926  | 1640  | 1733  | 1570  | 1304  | 1367  | 1379  | 1324  | 1781  | 2141  | 1843  | 1630  | 1842  | 1929  | 1864  | Cflar    |
| Cfp      | 1628  | 2382  | 2237  | 2620  | 2441  | 2223  | 2400  | 1323  | 1244  | 1652  | 1482  | 1492  | 1373  | 1365  | 1664  | 2154  | 2695  | 2685  | 2667  | 2146  | 2285  | 1823  | 1220  | 1568  | 1620  | 1373  | 1541  | 1355  | Cfp      |
| Cftr     | 88    | 67    | 27    | 47    | 46    | 72    | 58    | 123   | 147   | 119   | 123   | 41    | 77    | 45    | 86    | 93    | 45    | 45    | 43    | 85    | 68    | 58    | 169   | 69    | 68    | 73    | 63    | 42    | Cftr     |
| Cga      | 57    | 37    | 1     | 2     | 34    | 0     |       |       |       |       |       |       |       |       |       |       |       |       |       |       |       |       |       |       |       |       |       |       |          |

|         |       |       |       |       |       |       |       |       |       |       |       |       |       |       |       |       |       |       |       |       |       |       |       |       |       |       |       |       |         |
|---------|-------|-------|-------|-------|-------|-------|-------|-------|-------|-------|-------|-------|-------|-------|-------|-------|-------|-------|-------|-------|-------|-------|-------|-------|-------|-------|-------|-------|---------|
| Chd4    | 59991 | 62514 | 77083 | 73453 | 64138 | 65894 | 67182 | 40729 | 43039 | 53945 | 48610 | 65694 | 60461 | 67897 | 57430 | 64001 | 75668 | 69290 | 71565 | 51208 | 68563 | 49526 | 40417 | 58667 | 58480 | 54820 | 60837 | 66987 | Chd4    |
| Chd5    | 1266  | 1487  | 1300  | 3764  | 6545  | 4497  | 4618  | 3573  | 5049  | 6530  | 5401  | 3457  | 1999  | 3424  | 1377  | 1177  | 2481  | 4413  | 5209  | 3813  | 5068  | 7519  | 4023  | 5233  | 7673  | 1772  | 1964  | 2243  | Chd5    |
| Chd6    | 14681 | 14653 | 7758  | 11198 | 13361 | 14749 | 14872 | 17574 | 17145 | 14267 | 15068 | 14468 | 14351 | 15055 | 14308 | 13404 | 9741  | 11342 | 12645 | 15799 | 15656 | 12088 | 15367 | 11655 | 15616 | 8872  | 15689 | 13013 | Chd6    |
| Chd7    | 8405  | 9439  | 10139 | 11745 | 13565 | 12361 | 12524 | 11407 | 10492 | 14666 | 12099 | 19492 | 17939 | 19623 | 8931  | 9495  | 11471 | 11214 | 12655 | 10695 | 12835 | 12539 | 10200 | 14348 | 16453 | 11160 | 19866 | 18579 | Chd7    |
| Chd8    | 23469 | 23688 | 16737 | 22043 | 21251 | 23413 | 23309 | 22351 | 22373 | 21249 | 20405 | 23177 | 21675 | 23202 | 23475 | 21235 | 18967 | 20710 | 21394 | 22383 | 24479 | 19281 | 20235 | 18854 | 22662 | 14809 | 23373 | 22341 | Chd8    |
| Chd9    | 10250 | 9236  | 5561  | 7843  | 9749  | 10385 | 9736  | 13050 | 12006 | 10361 | 11032 | 9760  | 10453 | 10224 | 11003 | 10971 | 6598  | 7828  | 7893  | 11157 | 10601 | 9807  | 11103 | 7620  | 11145 | 5313  | 10796 | 8551  | Chd9    |
| Chdh    | 9     | 9     | 20    | 8     | 23    | 16    | 9     | 22    | 54    | 45    | 57    | 5     | 18    | 9     | 8     | 16    | 8     | 11    | 18    | 10    | 12    | 42    | 63    | 25    | 26    | 7     | 7     | 4     | Chdh    |
| Chek1   | 3229  | 2216  | 3311  | 2253  | 1694  | 2009  | 2465  | 3313  | 2760  | 2435  | 2564  | 3716  | 3302  | 3794  | 2647  | 2539  | 2630  | 2060  | 2220  | 2452  | 1952  | 2122  | 2462  | 3179  | 2738  | 4762  | 4094  | 4225  | Chek1   |
| Chek2   | 1662  | 1563  | 1998  | 1709  | 1225  | 1373  | 1640  | 1175  | 1018  | 1057  | 1002  | 1587  | 1413  | 1635  | 1551  | 1703  | 1656  | 1631  | 1406  | 1440  | 1364  | 872   | 972   | 1387  | 1122  | 1758  | 1727  | 1730  | Chek2   |
| Cherp   | 5244  | 6861  | 8218  | 7244  | 6255  | 5936  | 5668  | 4980  | 6015  | 7148  | 6793  | 8720  | 7077  | 7714  | 4944  | 6309  | 7642  | 6584  | 7119  | 4818  | 5580  | 6660  | 5935  | 7970  | 7187  | 9477  | 7204  | 7418  | Cherp   |
| Chfr    | 8707  | 9288  | 8491  | 9308  | 9327  | 9376  | 9947  | 7778  | 6587  | 7150  | 6299  | 7346  | 6704  | 7232  | 9521  | 8216  | 8841  | 9263  | 9524  | 9818  | 9967  | 7663  | 6631  | 7027  | 7676  | 6347  | 7137  | 7056  | Chfr    |
| Chga    | 2390  | 3580  | 3324  | 5280  | 5654  | 4697  | 4997  | 2144  | 2460  | 3038  | 2738  | 2523  | 2155  | 2404  | 3050  | 2792  | 4545  | 5588  | 5594  | 4460  | 5694  | 3178  | 2557  | 2853  | 3291  | 2044  | 1951  | 2144  | Chga    |
| Chgb    | 1768  | 2329  | 2913  | 3421  | 4644  | 3530  | 3384  | 3473  | 3036  | 4050  | 3051  | 3236  | 3701  | 3509  | 2942  | 2217  | 3427  | 3311  | 3657  | 4057  | 3620  | 4806  | 3048  | 3273  | 4256  | 1873  | 3301  | 3202  | Chgb    |
| Chia1   | 16    | 43    | 39    | 25    | 75    | 46    | 56    | 31    | 35    | 69    | 44    | 48    | 69    | 38    | 37    | 40    | 46    | 55    | 37    | 51    | 46    | 50    | 69    | 47    | 28    | 48    | 42    | 44    | Chia1   |
| Chic1   | 2526  | 1948  | 2258  | 2731  | 3288  | 3166  | 3521  | 3179  | 2444  | 2774  | 2961  | 2785  | 2858  | 3160  | 2730  | 2159  | 2538  | 2621  | 2991  | 2993  | 3413  | 3004  | 2477  | 2534  | 3006  | 1974  | 3052  | 3006  | Chic1   |
| Chic2   | 3035  | 2224  | 2324  | 2911  | 2975  | 2936  | 3322  | 2821  | 2383  | 2337  | 2405  | 2429  | 2116  | 2749  | 2921  | 2425  | 2589  | 2779  | 2783  | 2899  | 3186  | 2622  | 2275  | 2390  | 2541  | 2611  | 2451  | 2493  | Chic2   |
| Chid1   | 3313  | 3602  | 2374  | 2897  | 2926  | 3303  | 2968  | 2931  | 3185  | 2865  | 2948  | 2469  | 2609  | 2439  | 3570  | 3267  | 2526  | 3192  | 2846  | 3328  | 3157  | 2796  | 3105  | 2527  | 2628  | 2146  | 2719  | 2372  | Chid1   |
| Chi1    | 17    | 26    | 13    | 21    | 26    | 29    | 26    | 40    | 67    | 64    | 136   | 53    | 40    | 47    | 46    | 31    | 31    | 13    | 16    | 36    | 21    | 53    | 74    | 46    | 53    | 65    | 57    | 52    | Chi1    |
| Chi3    | 0     | 0     | 0     | 0     | 0     | 0     | 0     | 0     | 1     | 0     | 1     | 0     | 3     | 0     | 1     | 0     | 0     | 0     | 0     | 0     | 0     | 0     | 0     | 0     | 0     | 2     | 0     | 0     | Chi3    |
| Chi4    | 0     | 0     | 0     | 0     | 0     | 0     | 0     | 0     | 0     | 0     | 0     | 0     | 0     | 0     | 0     | 0     | 0     | 0     | 0     | 0     | 0     | 0     | 0     | 2     | 0     | 0     | 0     | 0     | Chi4    |
| Chi5    | 1     | 4     | 4     | 0     | 1     | 2     | 0     | 0     | 3     | 4     | 1     | 0     | 0     | 1     | 3     | 1     | 0     | 0     | 1     | 0     | 1     | 0     | 2     | 0     | 0     | 1     | 0     | 2     | Chi5    |
| Chi6    | 0     | 0     | 0     | 0     | 0     | 0     | 0     | 0     | 0     | 0     | 0     | 0     | 1     | 0     | 0     | 0     | 0     | 2     | 0     | 0     | 0     | 0     | 0     | 0     | 0     | 0     | 0     | 0     | Chi6    |
| Chit1   | 0     | 0     | 2     | 5     | 2     | 0     | 3     | 6     | 9     | 0     | 1     | 7     | 1     | 1     | 4     | 1     | 0     | 0     | 1     | 1     | 2     | 0     | 6     | 2     | 8     | 0     | 0     | 0     | Chit1   |
| Chka    | 9421  | 8789  | 7402  | 7983  | 8413  | 9019  | 8942  | 5897  | 5538  | 4803  | 5092  | 5166  | 5082  | 5137  | 9013  | 9195  | 7422  | 8029  | 8064  | 8574  | 9149  | 4680  | 5052  | 4430  | 4952  | 4721  | 5555  | 4989  | Chka    |
| Chkb    | 104   | 108   | 152   | 193   | 139   | 144   | 172   | 106   | 83    | 123   | 113   | 92    | 115   | 184   | 102   | 62    | 153   | 121   | 136   | 111   | 192   | 140   | 78    | 204   | 144   | 117   | 115   | 165   | Chkb    |
| Chl1    | 3865  | 4270  | 3099  | 6875  | 13874 | 10771 | 10561 | 20655 | 17015 | 16526 | 13727 | 8804  | 10231 | 9572  | 7530  | 4691  | 5293  | 8612  | 9575  | 12620 | 11773 | 21731 | 16453 | 10293 | 17959 | 4679  | 8519  | 8133  | Chl1    |
| Chm     | 3691  | 2640  | 2724  | 2663  | 3009  | 3279  | 3295  | 4786  | 4308  | 3537  | 3641  | 3966  | 3821  | 3987  | 4212  | 3370  | 2960  | 2709  | 2856  | 3917  | 3270  | 3920  | 4262  | 3382  | 3646  | 3523  | 4033  | 4101  | Chm     |
| Chml    | 3489  | 2747  | 3083  | 2768  | 3034  | 3226  | 3257  | 3160  | 2248  | 2292  | 2072  | 2723  | 2954  | 2995  | 3679  | 3287  | 2888  | 2625  | 3067  | 3306  | 3001  | 2526  | 2214  | 2062  | 2459  | 1994  | 3211  | 3170  | Chml    |
| Chmp1a  | 6204  | 7832  | 5749  | 6623  | 5867  | 6118  | 5632  | 6204  | 6251  | 5646  | 5596  | 6248  | 5810  | 5234  | 6247  | 6400  | 6280  | 6279  | 6760  | 6439  | 5961  | 5576  | 6559  | 5970  | 6381  | 6408  | 6276  | 5745  | Chmp1a  |
| Chmp1b  | 4095  | 3982  | 4067  | 3945  | 3238  | 3544  | 3865  | 3975  | 3023  | 2924  | 2769  | 3448  | 3463  | 3782  | 4192  | 3963  | 3691  | 3438  | 3468  | 3910  | 3840  | 3262  | 3280  | 3362  | 3356  | 3569  | 3956  | 4170  | Chmp1b  |
| Chmp2a  | 2841  | 3220  | 3236  | 3239  | 3239  | 3232  | 2998  | 4113  | 3080  | 4249  | 4032  | 4126  | 4009  | 4398  | 3152  | 2748  | 3540  | 3215  | 3574  | 3540  | 3133  | 4182  | 4166  | 4398  | 4702  | 4425  | 4148  | 4264  | Chmp2a  |
| Chmp2b  | 6436  | 4216  | 5803  | 5541  | 6235  | 5536  | 5479  | 3585  | 3598  | 3519  | 4287  | 2257  | 2925  | 2431  | 5921  | 5590  | 5225  | 5746  | 5252  | 4949  | 5460  | 3347  | 4538  | 3024  | 2802  | 3381  | 2292  | 2671  | Chmp2b  |
| Chmp3   | 1780  | 1564  | 1892  | 1712  | 1804  | 1902  | 1721  | 5135  | 5085  | 4853  | 4856  | 4857  | 4612  | 5033  | 2031  | 1672  | 1822  | 1742  | 1864  | 1931  | 1726  | 4752  | 5237  | 4778  | 4673  | 5093  | 4660  | 5026  | Chmp3   |
| Chmp4b  | 7867  | 8784  | 9617  | 9108  | 7945  | 7603  | 8006  | 7297  | 7105  | 7619  | 7488  | 7715  | 7325  | 7999  | 7820  | 7705  | 9288  | 8383  | 8605  | 7789  | 8325  | 6909  | 7609  | 8208  | 7820  | 8862  | 8118  | 8293  | Chmp4b  |
| Chmp4c  | 65    | 55    | 56    | 11    | 29    | 32    | 3     | 35    | 77    | 47    | 55    | 31    | 34    | 14    | 75    | 58    | 21    | 17    | 13    | 9     | 7     | 40    | 71    | 29    | 17    | 23    | 40    | 24    | Chmp4c  |
| Chmp5   | 6515  | 6143  | 6850  | 6717  | 6268  | 6130  | 7006  | 7767  | 6675  | 6957  | 6407  | 6903  | 6639  | 7517  | 7580  | 6699  | 7165  | 6346  | 6653  | 8460  | 6758  | 6679  | 6864  | 7118  | 7191  | 7233  | 7161  | 7244  | Chmp5   |
| Chmp6   | 1569  | 1746  | 2022  | 1684  | 1568  | 1588  | 1669  | 1729  | 2185  | 2400  | 2067  | 2452  | 2188  | 2429  | 1429  | 1526  | 1936  | 1554  | 1813  | 1600  | 1780  | 1836  | 1986  | 2396  | 2122  | 3031  | 2047  | 2652  | Chmp6   |
| Chmp7   | 8139  | 8499  | 8265  | 9072  | 8819  | 8798  | 9233  | 7565  | 6967  | 7306  | 6884  | 7643  | 6717  | 7195  | 8335  | 7432  | 8759  | 9178  | 9902  | 8562  | 9343  | 8133  | 6914  | 7701  | 7937  | 7543  | 7458  | 7541  | Chmp7   |
| Chn1    | 5144  | 5527  | 5210  | 6057  | 7487  | 6266  | 7476  | 7610  | 6567  | 7305  | 6887  | 6975  | 6542  | 7278  | 6191  | 4886  | 6101  | 6185  | 6952  | 7155  | 7325  | 8221  | 6193  | 7031  | 6323  | 6949  | 7206  | Chn1  |         |
| Chn2    | 1100  | 1164  | 1166  | 1268  | 1652  | 1479  | 1669  | 1854  | 1834  | 1933  | 1575  | 1791  | 1278  | 1238  | 1109  | 1286  | 1409  | 1630  | 1618  | 1522  | 2421  | 1652  | 1849  | 2220  | 1746  | 1713  | 1625  | Chn2  |         |
| Chod1   | 391   | 155   | 144   | 344   | 441   | 277   | 306   | 552   | 785   | 688   | 1255  | 276   | 358   | 275   | 339   | 273   | 251   | 308   | 298   | 260   | 317   | 620   | 1020  | 463   | 485   | 392   | 212   | 280   | Chod1   |
| Chordc1 | 9788  | 7461  | 9410  | 9255  | 9160  | 9174  | 10173 | 12875 | 10369 | 9978  | 10685 | 10861 | 10746 | 11262 | 10291 | 9322  | 9295  | 8488  | 9043  | 10020 | 9311  | 11593 | 10255 | 10832 | 10614 | 10251 | 11293 | 11322 | Chordc1 |
| Chp1    | 15141 | 12989 | 11696 | 12141 | 11331 | 11353 | 12752 | 6736  | 6180  | 5760  | 5656  | 6169  | 6004  | 6365  | 14181 | 12753 | 12133 | 12676 | 12212 | 11348 | 12776 | 6490  | 6437  | 5940  | 5974  | 6718  | 6136  | 6276  | Chp1    |
| Chp2    | 5     | 10    | 21    | 5     | 38    | 45    | 22    | 116   | 104   | 124   | 107   | 99    | 85    | 103   | 11    | 7     | 20    | 23    | 26    | 25    | 20    | 112   | 91    | 85    | 95    | 65    | 85    | 90    | Chp2    |
| Chpf    | 2876  | 4039  | 3367  | 3828  | 3195  | 3345  | 2670  | 1577  | 1973  | 2023  | 2279  | 1766  | 1692  | 1488  | 2835  | 3434  | 3548  | 3825  | 3427  | 2597  | 2876  | 2361  | 2151  | 1803  | 1943  | 1724  | 1707  | 1518  | Chpf    |
| Chpf2   | 2832  | 3490  | 3463  | 3285  | 3050  | 3068  | 2668  | 1856  | 2506  | 2563  | 2927  | 2725  | 2853  | 2473  | 2672  | 3277  | 3427  | 3341  | 3207  | 2455  | 2686  | 2605  | 2401  | 2690  | 2834  | 2666  | 2797  | 2515  | Chpf2   |
| Chpt1   | 3599  | 2064  | 2911  | 2451  | 2068  | 2814  | 2362  | 2348  | 2431  | 2012  | 2426  | 2105  | 2367  | 2169  | 3233  | 3340  | 2342  | 2469  | 2005  | 2353  | 2334  | 1910  | 2504  | 1968  | 1873  | 2073  | 1985  | 2219  | Chpt1   |
| Chrac1  | 438   | 439   | 544   | 353   | 387   | 382   | 432   | 1095  | 1083  | 1053  | 1032  | 1122  | 1168  | 1262  | 483   | 400   | 400   | 374</ |       |       |       |       |       |       |       |       |       |       |         |



|          |       |       |       |       |       |       |       |       |       |       |       |       |       |       |       |       |       |       |       |       |       |       |       |       |       |       |       |       |          |      |
|----------|-------|-------|-------|-------|-------|-------|-------|-------|-------|-------|-------|-------|-------|-------|-------|-------|-------|-------|-------|-------|-------|-------|-------|-------|-------|-------|-------|-------|----------|------|
| Chst2    | 2911  | 3005  | 4442  | 3913  | 3800  | 3898  | 3590  | 2757  | 2980  | 3279  | 3497  | 3645  | 3527  | 3634  | 2863  | 3128  | 3965  | 3649  | 3872  | 3272  | 3569  | 3888  | 3116  | 3608  | 3706  | 4439  | 3893  | 3896  | Chst2    |      |
| Chst3    | 1006  | 1024  | 1215  | 1059  | 1135  | 1119  | 1053  | 1270  | 1297  | 1478  | 1524  | 1617  | 1535  | 1603  | 982   | 876   | 1389  | 1042  | 1279  | 888   | 1077  | 1512  | 1181  | 1614  | 1378  | 1755  | 1529  | 1815  | Chst3    |      |
| Chst4    | 0     | 0     | 0     | 0     | 0     | 0     | 1     | 0     | 0     | 0     | 1     | 0     | 0     | 0     | 0     | 0     | 0     | 3     | 1     | 0     | 2     | 0     | 0     | 0     | 0     | 0     | 0     | 0     | Chst4    |      |
| Chst5    | 28    | 29    | 44    | 7     | 38    | 26    | 15    | 100   | 134   | 74    | 102   | 78    | 102   | 98    | 24    | 46    | 9     | 26    | 18    | 22    | 22    | 72    | 141   | 85    | 72    | 58    | 71    | 123   | Chst5    |      |
| Chst7    | 249   | 265   | 286   | 229   | 272   | 270   | 221   | 101   | 124   | 93    | 131   | 105   | 87    | 100   | 215   | 269   | 177   | 304   | 275   | 266   | 264   | 84    | 140   | 111   | 104   | 141   | 93    | 78    | Chst7    |      |
| Chst8    | 571   | 863   | 728   | 737   | 744   | 696   | 594   | 423   | 487   | 591   | 523   | 631   | 574   | 514   | 683   | 783   | 873   | 655   | 749   | 760   | 686   | 698   | 498   | 499   | 667   | 561   | 551   | 559   | Chst8    |      |
| Chst9    | 45    | 46    | 33    | 40    | 53    | 24    | 51    | 40    | 26    | 32    | 20    | 20    | 25    | 32    | 78    | 71    | 25    | 53    | 26    | 37    | 47    | 28    | 26    | 32    | 27    | 7     | 22    | 34    | Chst9    |      |
| Chsy1    | 4535  | 4006  | 5390  | 4860  | 4214  | 4268  | 3845  | 3864  | 4353  | 4570  | 5633  | 4787  | 5009  | 4619  | 4160  | 4834  | 4702  | 4566  | 4072  | 3402  | 3808  | 4542  | 4625  | 4931  | 4446  | 5658  | 4571  | 4806  | Chsy1    |      |
| Chsy3    | 305   | 251   | 204   | 307   | 309   | 343   | 227   | 343   | 417   | 446   | 548   | 241   | 324   | 296   | 278   | 368   | 256   | 318   | 222   | 217   | 239   | 506   | 511   | 332   | 344   | 283   | 255   | 275   | Chsy3    |      |
| Chtf18   | 2756  | 3400  | 3819  | 3054  | 1864  | 2195  | 2240  | 1238  | 1520  | 1550  | 1444  | 2391  | 1825  | 2027  | 2229  | 2760  | 3227  | 2676  | 2643  | 2015  | 2163  | 1043  | 1335  | 1964  | 1545  | 2975  | 2137  | 2035  | Chtf18   |      |
| Chtf8    | 82    | 103   | 93    | 93    | 84    | 123   | 93    | 137   | 127   | 120   | 101   | 94    | 112   | 134   | 82    | 79    | 80    | 102   | 104   | 90    | 104   | 99    | 83    | 126   | 151   | 106   | 150   | 115   | Chtf8    |      |
| Chtop    | 14820 | 13582 | 14905 | 14555 | 14941 | 14653 | 15836 | 22514 | 20910 | 20379 | 19576 | 22761 | 20478 | 22211 | 15154 | 13105 | 15515 | 14046 | 16105 | 15714 | 15715 | 19916 | 20335 | 21570 | 21202 | 23777 | 22636 | 22869 | Chtop    |      |
| Chuk     | 9292  | 7429  | 7521  | 8317  | 8144  | 8334  | 9213  | 8636  | 7055  | 6695  | 7481  | 8051  | 7343  | 8262  | 9216  | 8450  | 7601  | 8099  | 7701  | 8431  | 8798  | 8335  | 7011  | 7173  | 7874  | 6634  | 8056  | 7900  | Chuk     |      |
| Churc1   | 176   | 134   | 111   | 116   | 110   | 146   | 148   | 194   | 162   | 199   | 151   | 121   | 170   | 232   | 177   | 122   | 112   | 139   | 129   | 107   | 164   | 165   | 150   | 126   | 170   | 183   | 189   | 218   | Churc1   |      |
| Ciao1    | 3804  | 4190  | 3717  | 4000  | 3306  | 3404  | 3604  | 3042  | 2917  | 2883  | 2708  | 2631  | 2773  | 2750  | 3956  | 3696  | 3640  | 3995  | 3625  | 3998  | 3669  | 2709  | 3065  | 2913  | 2898  | 2843  | 2840  | 2773  | Ciao1    |      |
| Ciao2a   | 4134  | 3874  | 4810  | 4011  | 3269  | 3461  | 4205  | 3497  | 3125  | 3080  | 3372  | 3596  | 3664  | 3898  | 4338  | 4144  | 4376  | 3612  | 3650  | 4062  | 3615  | 2543  | 3399  | 3663  | 3144  | 4587  | 3989  | 4196  | Ciao2a   |      |
| Ciao2b   | 1121  | 1544  | 1404  | 1539  | 1286  | 1252  | 1521  | 968   | 1003  | 1007  | 1041  | 1177  | 904   | 1213  | 1054  | 1164  | 1531  | 1442  | 1452  | 1361  | 1437  | 973   | 1006  | 1165  | 1166  | 1318  | 1149  | 1222  | Ciao2b   |      |
| Ciao3    | 1177  | 1443  | 1377  | 1230  | 1120  | 1073  | 1142  | 1194  | 1418  | 1426  | 1314  | 1332  | 1331  | 1281  | 1087  | 1213  | 1168  | 1163  | 1302  | 1136  | 1257  | 1233  | 1411  | 1352  | 1422  | 1514  | 1345  | 1326  | Ciao3    |      |
| Clapin1  | 5180  | 6230  | 5619  | 6418  | 5791  | 5733  | 6010  | 5131  | 5094  | 5027  | 4577  | 5370  | 5200  | 5630  | 5441  | 5612  | 5898  | 5746  | 6160  | 6362  | 6112  | 4868  | 4916  | 5270  | 5339  | 5703  | 5801  | 5700  | Clapin1  |      |
| Clart    | 185   | 239   | 161   | 237   | 124   | 119   | 110   | 134   | 132   | 114   | 162   | 131   | 121   | 147   | 214   | 271   | 191   | 216   | 118   | 108   | 149   | 92    | 169   | 150   | 118   | 154   | 114   | 164   | Clart    |      |
| Cib1     | 1599  | 1913  | 1989  | 1844  | 1280  | 1234  | 1304  | 677   | 784   | 756   | 689   | 775   | 812   | 764   | 1478  | 1874  | 1728  | 1557  | 1469  | 1371  | 1322  | 683   | 832   | 778   | 720   | 1017  | 859   | 853   | Cib1     |      |
| Cib2     | 772   | 772   | 625   | 603   | 862   | 702   | 713   | 700   | 753   | 855   | 730   | 626   | 586   | 573   | 807   | 805   | 689   | 797   | 724   | 761   | 767   | 742   | 806   | 754   | 667   | 621   | 623   | 590   | Cib2     |      |
| Cib3     | 1     | 0     | 0     | 1     | 0     | 0     | 0     | 1     | 0     | 4     | 0     | 0     | 0     | 0     | 0     | 3     | 0     | 0     | 3     | 0     | 0     | 0     | 0     | 0     | 0     | 0     | 0     | 0     | 2        | Cib3 |
| Cib4     | 0     | 0     | 0     | 1     | 0     | 0     | 0     | 0     | 3     | 0     | 3     | 0     | 7     | 0     | 0     | 0     | 0     | 2     | 0     | 0     | 0     | 2     | 0     | 0     | 0     | 0     | 3     | 0     | 0        | Cib4 |
| Cibar1   | 2633  | 1873  | 2142  | 2143  | 2445  | 2534  | 2489  | 4435  | 3891  | 3650  | 3857  | 3917  | 3951  | 3889  | 2699  | 2241  | 2036  | 1935  | 2187  | 2958  | 2469  | 3656  | 4129  | 3712  | 3741  | 4137  | 4006  | 3963  | Cibar1   |      |
| Cibar2   | 38    | 57    | 23    | 42    | 39    | 51    | 34    | 82    | 59    | 65    | 58    | 104   | 69    | 64    | 47    | 66    | 45    | 29    | 41    | 56    | 41    | 62    | 85    | 88    | 53    | 107   | 72    | 72    | Cibar2   |      |
| Cic      | 10893 | 15393 | 17072 | 19149 | 18026 | 15567 | 14313 | 11917 | 15050 | 18506 | 17123 | 19457 | 16037 | 16514 | 10261 | 12499 | 19047 | 18324 | 19221 | 12574 | 15326 | 17749 | 13802 | 20349 | 18403 | 19358 | 15955 | 15664 | Cic      |      |
| Cidea    | 20    | 29    | 8     | 19    | 11    | 10    | 6     | 15    | 19    | 7     | 16    | 0     | 5     | 0     | 18    | 40    | 20    | 9     | 8     | 15    | 2     | 23    | 18    | 3     | 6     | 7     | 0     | 1     | Cidea    |      |
| Cideb    | 9     | 10    | 4     | 7     | 10    | 11    | 10    | 6     | 29    | 19    | 26    | 9     | 10    | 5     | 11    | 9     | 12    | 2     | 4     | 6     | 4     | 12    | 15    | 19    | 6     | 16    | 9     | 2     | Cideb    |      |
| Cidec    | 0     | 0     | 0     | 1     | 0     | 1     | 0     | 0     | 0     | 0     | 0     | 0     | 0     | 0     | 0     | 0     | 0     | 1     | 3     | 0     | 0     | 0     | 0     | 0     | 0     | 0     | 0     | 2     | Cidec    |      |
| Ciita    | 6     | 3     | 1     | 3     | 3     | 15    | 7     | 4     | 7     | 8     | 15    | 3     | 0     | 1     | 0     | 6     | 0     | 0     | 4     | 1     | 3     | 17    | 12    | 1     | 6     | 1     | 5     | 0     | Ciita    |      |
| Cilk1    | 4124  | 3947  | 4942  | 5085  | 6428  | 5670  | 5794  | 5755  | 5487  | 6817  | 6177  | 6703  | 6702  | 7021  | 4178  | 4109  | 5283  | 5399  | 5919  | 4575  | 6118  | 7427  | 5474  | 6823  | 7384  | 5978  | 6422  | 6694  | Cilk1    |      |
| Cilp     | 43    | 48    | 43    | 26    | 35    | 52    | 44    | 61    | 91    | 53    | 239   | 106   | 83    | 79    | 49    | 44    | 34    | 39    | 42    | 37    | 31    | 95    | 139   | 65    | 61    | 140   | 91    | 83    | Cilp     |      |
| Cilp2    | 138   | 181   | 202   | 171   | 263   | 179   | 143   | 93    | 101   | 161   | 144   | 71    | 44    | 42    | 166   | 131   | 205   | 206   | 185   | 170   | 145   | 89    | 135   | 78    | 76    | 59    | 59    | 55    | Cilp2    |      |
| Cinp     | 3712  | 4000  | 3458  | 3566  | 2737  | 2909  | 3315  | 2284  | 2077  | 1972  | 2137  | 2257  | 2142  | 2422  | 3701  | 3619  | 3291  | 3431  | 2907  | 3377  | 3450  | 2000  | 2124  | 2134  | 2147  | 2524  | 2215  | 2606  | Cinp     |      |
| Cip2a    | 10092 | 7053  | 8315  | 6542  | 4968  | 6475  | 7478  | 8527  | 6896  | 5877  | 5819  | 9260  | 7482  | 9231  | 9480  | 8208  | 7339  | 6107  | 6434  | 8350  | 6595  | 5230  | 6323  | 7591  | 6580  | 9711  | 9423  | 8994  | Cip2a    |      |
| Cipc     | 3393  | 3701  | 4108  | 4729  | 5454  | 4933  | 5311  | 5689  | 5291  | 6402  | 5325  | 6576  | 5539  | 5989  | 3712  | 3248  | 4715  | 4664  | 5933  | 5043  | 4774  | 6211  | 4793  | 6971  | 6948  | 6693  | 5861  | 6132  | Cipc     |      |
| Cir1     | 3234  | 2808  | 3115  | 3131  | 2543  | 2680  | 2972  | 2811  | 2544  | 2766  | 2495  | 2628  | 2745  | 2502  | 2920  | 3231  | 3400  | 2921  | 3133  | 2902  | 3045  | 2251  | 2341  | 2899  | 2322  | 2534  | 2379  | 2376  | Cir1     |      |
| Cirhp    | 6534  | 6969  | 8069  | 10445 | 9647  | 9372  | 8734  | 6746  | 7950  | 9625  | 8765  | 10593 | 9122  | 10530 | 7031  | 5487  | 8902  | 9270  | 9238  | 9111  | 9119  | 8072  | 7309  | 10748 | 11353 | 11043 | 9825  | 9413  | Cirhp    |      |
| Cisd1    | 2000  | 2717  | 2073  | 2357  | 2477  | 2305  | 2952  | 2000  | 2066  | 2071  | 1813  | 2028  | 1859  | 2177  | 2288  | 1946  | 2459  | 2324  | 2686  | 2933  | 2825  | 1860  | 1888  | 2121  | 2225  | 2132  | 2060  | 2156  | Cisd1    |      |
| Cisd2    | 4124  | 3409  | 4728  | 4210  | 3983  | 4473  | 5183  | 5897  | 4974  | 5339  | 5706  | 6843  | 6430  | 7257  | 4250  | 3863  | 4589  | 4113  | 4373  | 4165  | 4506  | 6211  | 5075  | 6235  | 6139  | 7229  | 7275  | 7484  | Cisd2    |      |
| Cisd3    | 581   | 741   | 704   | 686   | 625   | 509   | 543   | 300   | 308   | 295   | 357   | 287   | 355   | 289   | 658   | 710   | 574   | 686   | 620   | 721   | 575   | 294   | 340   | 369   | 380   | 361   | 354   | 369   | Cisd3    |      |
| Cish     | 612   | 720   | 732   | 786   | 947   | 742   | 713   | 421   | 553   | 613   | 656   | 520   | 593   | 516   | 541   | 671   | 897   | 824   | 884   | 605   | 737   | 570   | 584   | 567   | 620   | 656   | 446   | 573   | Cish     |      |
| Cit      | 3325  | 3814  | 4378  | 4537  | 3797  | 3686  | 3432  | 2459  | 2838  | 3192  | 3047  | 5010  | 3978  | 4549  | 2860  | 3288  | 4631  | 4116  | 4260  | 2937  | 3656  | 2928  | 2319  | 3974  | 3577  | 3039  | 4267  | 4284  | Cit      |      |
| Cited1   | 309   | 420   | 393   | 399   | 346   | 282   | 413   | 133   | 182   | 149   | 219   | 159   | 117   | 154   | 322   | 405   | 397   | 395   | 370   | 364   | 323   | 174   | 179   | 191   | 142   | 201   | 156   | 158   | Cited1   |      |
| Cited2   | 3246  | 3909  | 5509  | 4599  | 4770  | 3845  | 4010  | 4245  | 3804  | 5090  | 4297  | 5640  | 5400  | 5343  | 3847  | 3706  | 5186  | 4293  | 4597  | 3312  | 4097  | 6254  | 4068  | 5243  | 5434  | 5157  | 5204  | 5784  | Cited2   |      |
| Cited4   | 106   | 196   | 172   | 122   | 52    | 69    | 79    | 17    | 43    | 26    | 31    | 42    | 162   | 102   | 142   | 154   | 134   | 102   | 79    | 84    | 68    | 12    | 34    | 25    | 27    | 77    | 89    | 230   | Cited4   |      |
| Ciz1     | 5705  | 6721  | 7261  | 7429  | 6390  | 6538  | 6117  | 4833  | 5595  | 6738  | 6228  | 6932  | 6321  | 6163  | 5549  | 6204  | 7421  | 7092  | 7463  | 6196  | 6354  | 6433  | 5354  | 6918  | 6554  | 6726  | 6151  | 5864  | Ciz1     |      |
| CK137956 | 23    | 17    | 10    | 17    | 32    | 25    | 8     | 32    | 30    | 27    | 25    | 14    | 34    | 32    | 9     | 12    | 24    | 17    | 26    | 22    | 19    | 45    | 23    | 27    | 30    | 28    | 40    | 18    | CK137956 |      |
| Ckap2    | 4429  | 3975  | 4206  | 3755  | 3175  | 3605  | 3730  | 4858  | 4376  | 3874  | 3521  | 5600  | 5051  | 6001  | 4316  | 3837  | 3872  | 3163  | 3681  |       |       |       |       |       |       |       |       |       |          |      |

|          |      |      |      |      |      |      |      |      |      |      |      |      |      |      |      |      |      |      |      |      |      |      |      |      |      |      |      |      |          |
|----------|------|------|------|------|------|------|------|------|------|------|------|------|------|------|------|------|------|------|------|------|------|------|------|------|------|------|------|------|----------|
| Clcn7    | 4583 | 5343 | 4323 | 4948 | 4625 | 4878 | 4604 | 3445 | 3827 | 3974 | 3776 | 3926 | 3938 | 3821 | 4100 | 5005 | 4509 | 5302 | 4697 | 4251 | 4636 | 3950 | 3551 | 3619 | 4158 | 3415 | 3849 | 3452 | Clcn7    |
| Clcna    | 13   | 3    | 5    | 2    | 0    | 7    | 2    | 5    | 26   | 7    | 27   | 1    | 15   | 1    | 5    | 7    | 6    | 2    | 0    | 0    | 4    | 15   | 13   | 9    | 0    | 12   | 1    | 2    | Clcna    |
| Clcnkb   | 0    | 0    | 0    | 2    | 2    | 0    | 0    | 5    | 2    | 1    | 0    | 0    | 2    | 0    | 0    | 0    | 0    | 2    | 0    | 0    | 1    | 3    | 3    | 0    | 0    | 0    | 0    | 2    | Clcnkb   |
| Cldn1    | 727  | 517  | 580  | 337  | 583  | 446  | 303  | 683  | 888  | 490  | 642  | 480  | 818  | 305  | 800  | 980  | 406  | 403  | 312  | 458  | 328  | 759  | 1211 | 372  | 312  | 412  | 363  | 417  | Cldn1    |
| Cldn10   | 127  | 92   | 115  | 105  | 70   | 87   | 47   | 16   | 38   | 6    | 53   | 27   | 37   | 10   | 116  | 136  | 93   | 88   | 48   | 59   | 65   | 10   | 34   | 17   | 13   | 17   | 22   | 12   | Cldn10   |
| Cldn11   | 1617 | 1263 | 1310 | 1942 | 1818 | 1517 | 1541 | 1859 | 2343 | 2215 | 2523 | 1642 | 1698 | 1869 | 1419 | 1670 | 1203 | 2161 | 1234 | 1468 | 1739 | 2137 | 3423 | 2653 | 2152 | 2032 | 1067 | 1381 | Cldn11   |
| Cldn12   | 5225 | 4991 | 4696 | 4340 | 3494 | 4338 | 4227 | 4279 | 3680 | 3217 | 3151 | 3865 | 3675 | 3942 | 5436 | 4647 | 4679 | 4291 | 4157 | 4919 | 4068 | 3437 | 3589 | 3643 | 3450 | 4358 | 4071 | 4315 | Cldn12   |
| Cldn13   | 13   | 22   | 18   | 16   | 0    | 10   | 2    | 15   | 16   | 21   | 9    | 15   | 70   | 51   | 21   | 30   | 16   | 3    | 3    | 17   | 5    | 3    | 13   | 14   | 2    | 39   | 36   | 147  | Cldn13   |
| Cldn14   | 1    | 1    | 0    | 3    | 0    | 0    | 2    | 4    | 4    | 3    | 0    | 0    | 6    | 0    | 3    | 2    | 0    | 0    | 0    | 0    | 3    | 0    | 1    | 2    | 0    | 0    | 0    | 4    | Cldn14   |
| Cldn15   | 179  | 206  | 173  | 204  | 187  | 179  | 189  | 60   | 49   | 36   | 45   | 61   | 77   | 81   | 124  | 199  | 251  | 230  | 226  | 132  | 204  | 53   | 42   | 45   | 60   | 59   | 94   | 55   | Cldn15   |
| Cldn16   | 0    | 0    | 0    | 0    | 0    | 0    | 0    | 0    | 2    | 0    | 0    | 0    | 0    | 0    | 0    | 0    | 0    | 0    | 0    | 0    | 0    | 0    | 0    | 0    | 0    | 0    | 0    | 0    | Cldn16   |
| Cldn18   | 0    | 0    | 0    | 0    | 0    | 0    | 0    | 0    | 1    | 0    | 0    | 0    | 0    | 0    | 0    | 0    | 0    | 0    | 0    | 0    | 0    | 0    | 0    | 0    | 0    | 0    | 0    | 0    | Cldn18   |
| Cldn19   | 6    | 10   | 6    | 4    | 18   | 12   | 6    | 33   | 71   | 91   | 59   | 34   | 59   | 64   | 12   | 9    | 2    | 6    | 14   | 16   | 17   | 57   | 125  | 47   | 82   | 49   | 53   | 58   | Cldn19   |
| Cldn2    | 15   | 15   | 16   | 6    | 29   | 22   | 11   | 44   | 54   | 46   | 72   | 28   | 57   | 22   | 13   | 41   | 7    | 4    | 5    | 14   | 14   | 72   | 126  | 24   | 23   | 15   | 22   | 25   | Cldn2    |
| Cldn22   | 0    | 0    | 0    | 0    | 0    | 0    | 0    | 9    | 12   | 8    | 17   | 0    | 11   | 0    | 0    | 0    | 0    | 0    | 0    | 0    | 0    | 15   | 8    | 2    | 0    | 0    | 0    | 0    | Cldn22   |
| Cldn23   | 84   | 58   | 27   | 62   | 20   | 41   | 36   | 110  | 114  | 117  | 89   | 67   | 73   | 66   | 54   | 60   | 45   | 44   | 70   | 30   | 45   | 42   | 145  | 159  | 46   | 139  | 70   | 70   | Cldn23   |
| Cldn24   | 0    | 0    | 0    | 0    | 0    | 0    | 0    | 13   | 6    | 3    | 13   | 0    | 3    | 0    | 0    | 0    | 0    | 0    | 0    | 0    | 0    | 3    | 2    | 0    | 0    | 1    | 1    | 0    | Cldn24   |
| Cldn3    | 125  | 85   | 63   | 61   | 43   | 63   | 19   | 161  | 180  | 234  | 148  | 40   | 102  | 42   | 84   | 103  | 39   | 35   | 48   | 39   | 29   | 90   | 192  | 235  | 19   | 256  | 41   | 46   | Cldn3    |
| Cldn34b3 | 0    | 0    | 0    | 0    | 0    | 0    | 0    | 0    | 0    | 0    | 0    | 3    | 0    | 0    | 0    | 0    | 0    | 0    | 0    | 0    | 0    | 0    | 0    | 2    | 0    | 0    | 0    | 0    | Cldn34b3 |
| Cldn34c1 | 519  | 357  | 390  | 515  | 589  | 649  | 620  | 950  | 846  | 759  | 707  | 704  | 785  | 861  | 553  | 466  | 446  | 451  | 569  | 654  | 590  | 966  | 822  | 756  | 785  | 708  | 995  | 770  | Cldn34c1 |
| Cldn34c2 | 0    | 1    | 0    | 1    | 1    | 2    | 0    | 0    | 1    | 0    | 0    | 1    | 1    | 2    | 0    | 0    | 5    | 1    | 1    | 0    | 0    | 0    | 2    | 0    | 2    | 1    | 2    | 0    | Cldn34c2 |
| Cldn34d  | 0    | 0    | 0    | 0    | 0    | 0    | 0    | 0    | 0    | 0    | 0    | 0    | 0    | 0    | 0    | 0    | 0    | 0    | 2    | 0    | 0    | 0    | 0    | 0    | 0    | 0    | 0    | 0    | Cldn34d  |
| Cldn4    | 451  | 275  | 194  | 59   | 20   | 180  | 2    | 360  | 563  | 333  | 384  | 161  | 262  | 143  | 306  | 357  | 58   | 119  | 15   | 17   | 3    | 75   | 603  | 366  | 39   | 364  | 151  | 218  | Cldn4    |
| Cldn5    | 702  | 816  | 1080 | 938  | 1280 | 934  | 888  | 1253 | 1390 | 1814 | 1881 | 1538 | 1540 | 1277 | 728  | 794  | 909  | 844  | 1149 | 920  | 1012 | 1479 | 1732 | 1659 | 2002 | 1645 | 1429 | 1245 | Cldn5    |
| Cldn6    | 1232 | 602  | 268  | 303  | 119  | 187  | 53   | 767  | 770  | 635  | 655  | 98   | 299  | 125  | 687  | 734  | 156  | 213  | 51   | 85   | 51   | 279  | 759  | 759  | 57   | 994  | 110  | 120  | Cldn6    |
| Cldn7    | 189  | 119  | 37   | 97   | 29   | 24   | 2    | 173  | 185  | 236  | 147  | 41   | 112  | 43   | 103  | 145  | 17   | 35   | 12   | 0    | 3    | 57   | 216  | 225  | 17   | 319  | 35   | 52   | Cldn7    |
| Cldn8    | 68   | 24   | 16   | 3    | 5    | 29   | 1    | 109  | 180  | 80   | 116  | 25   | 65   | 45   | 71   | 52   | 6    | 43   | 11   | 0    | 0    | 35   | 170  | 78   | 14   | 28   | 23   | 38   | Cldn8    |
| Cldn9    | 321  | 226  | 126  | 223  | 117  | 140  | 174  | 167  | 206  | 261  | 235  | 73   | 111  | 77   | 206  | 238  | 155  | 178  | 132  | 169  | 139  | 104  | 192  | 279  | 60   | 366  | 56   | 69   | Cldn9    |
| Cldnd1   | 6770 | 6325 | 7357 | 6809 | 6172 | 6197 | 6797 | 5254 | 5006 | 4699 | 5006 | 4819 | 5036 | 5136 | 6898 | 6615 | 7065 | 6796 | 6316 | 6742 | 6320 | 4881 | 5066 | 5065 | 4719 | 5544 | 4965 | 5256 | Cldnd1   |
| Cldnd2   | 5    | 3    | 7    | 3    | 1    | 11   | 1    | 10   | 5    | 6    | 12   | 11   | 11   | 3    | 5    | 10   | 2    | 8    | 1    | 2    | 4    | 15   | 23   | 5    | 14   | 8    | 5    | 13   | Cldnd2   |
| Clec10a  | 12   | 21   | 29   | 24   | 14   | 26   | 9    | 31   | 38   | 32   | 42   | 43   | 36   | 44   | 20   | 17   | 14   | 17   | 16   | 9    | 13   | 57   | 45   | 32   | 22   | 33   | 43   | 32   | Clec10a  |
| Clec11a  | 102  | 155  | 210  | 144  | 123  | 168  | 116  | 105  | 140  | 194  | 174  | 126  | 69   | 113  | 138  | 154  | 152  | 139  | 134  | 126  | 125  | 135  | 227  | 158  | 177  | 126  | 103  | 83   | Clec11a  |
| Clec12a  | 17   | 5    | 6    | 6    | 11   | 2    | 0    | 34   | 39   | 66   | 33   | 4    | 17   | 11   | 1    | 9    | 2    | 1    | 1    | 0    | 1    | 18   | 51   | 30   | 21   | 45   | 9    | 7    | Clec12a  |
| Clec12b  | 2    | 0    | 0    | 1    | 3    | 8    | 3    | 2    | 2    | 10   | 0    | 3    | 5    | 2    | 5    | 2    | 0    | 0    | 2    | 0    | 1    | 3    | 5    | 0    | 3    | 1    | 0    | 5    | Clec12b  |
| Clec14a  | 361  | 256  | 419  | 195  | 452  | 457  | 323  | 1003 | 1147 | 1088 | 1319 | 1044 | 1410 | 1105 | 384  | 319  | 336  | 246  | 349  | 439  | 335  | 1141 | 1587 | 1039 | 1094 | 1109 | 1295 | 991  | Clec14a  |
| Clec16a  | 6150 | 6574 | 5736 | 7107 | 6883 | 6404 | 6740 | 3993 | 4024 | 4283 | 3779 | 4023 | 3374 | 3688 | 6091 | 5886 | 6720 | 7080 | 7058 | 5764 | 6921 | 4859 | 3831 | 3883 | 4358 | 3069 | 3449 | 3436 | Clec16a  |
| Clec18a  | 20   | 76   | 74   | 34   | 87   | 55   | 27   | 95   | 125  | 92   | 124  | 58   | 105  | 43   | 66   | 82   | 37   | 64   | 43   | 24   | 32   | 154  | 101  | 40   | 100  | 45   | 59   | 58   | Clec18a  |
| Clec1a   | 110  | 66   | 46   | 57   | 92   | 78   | 98   | 181  | 152  | 157  | 148  | 140  | 147  | 131  | 95   | 62   | 51   | 107  | 70   | 137  | 100  | 162  | 208  | 97   | 117  | 193  | 152  | 135  | Clec1a   |
| Clec1b   | 250  | 190  | 252  | 140  | 126  | 129  | 162  | 198  | 141  | 142  | 109  | 225  | 340  | 218  | 193  | 199  | 209  | 125  | 150  | 250  | 189  | 94   | 155  | 181  | 129  | 240  | 308  | 252  | Clec1b   |
| Clec2d   | 84   | 66   | 92   | 90   | 67   | 46   | 75   | 180  | 175  | 250  | 346  | 89   | 153  | 226  | 82   | 49   | 54   | 81   | 71   | 73   | 86   | 155  | 238  | 296  | 201  | 205  | 138  | 186  | Clec2d   |
| Clec2e   | 1    | 0    | 3    | 0    | 0    | 0    | 1    | 0    | 0    | 0    | 4    | 1    | 0    | 0    | 0    | 0    | 0    | 0    | 0    | 1    | 0    | 1    | 0    | 0    | 0    | 4    | 0    | 0    | Clec2e   |
| Clec2f   | 1    | 1    | 0    | 0    | 0    | 1    | 0    | 0    | 0    | 0    | 3    | 0    | 0    | 0    | 0    | 2    | 0    | 0    | 0    | 0    | 0    | 0    | 1    | 0    | 0    | 0    | 0    | 0    | Clec2f   |
| Clec2g   | 0    | 0    | 1    | 0    | 0    | 0    | 0    | 0    | 3    | 1    | 0    | 0    | 3    | 0    | 0    | 1    | 0    | 0    | 0    | 0    | 0    | 2    | 2    | 1    | 1    | 0    | 0    | 0    | Clec2g   |
| Clec2h   | 0    | 0    | 0    | 0    | 0    | 0    | 0    | 0    | 2    | 0    | 0    | 0    | 0    | 0    | 0    | 1    | 0    | 0    | 0    | 0    | 0    | 0    | 0    | 0    | 0    | 0    | 0    | 0    | Clec2h   |
| Clec2i   | 27   | 10   | 30   | 13   | 7    | 8    | 11   | 4    | 2    | 6    | 4    | 0    | 2    | 6    | 7    | 12   | 21   | 3    | 5    | 5    | 7    | 10   | 6    | 4    | 5    | 7    | 1    | 2    | Clec2i   |
| Clec2l   | 193  | 185  | 174  | 228  | 382  | 286  | 266  | 416  | 493  | 485  | 463  | 317  | 327  | 268  | 193  | 192  | 187  | 217  | 309  | 234  | 289  | 465  | 476  | 380  | 493  | 300  | 298  | 216  | Clec2l   |
| Clec2m   | 1    | 0    | 1    | 2    | 0    | 1    | 0    | 7    | 2    | 0    | 1    | 0    | 0    | 0    | 0    | 4    | 0    | 0    | 2    | 0    | 2    | 0    | 1    | 0    | 0    | 0    | 3    | 0    | Clec2m   |
| Clec3a   | 1    | 0    | 0    | 0    | 0    | 0    | 0    | 5    | 3    | 3    | 60   | 0    | 5    | 0    | 3    | 2    | 0    | 0    | 0    | 0    | 0    | 3    | 5    | 0    | 0    | 0    | 6    | 4    | Clec3a   |
| Clec3b   | 29   | 29   | 54   | 47   | 55   | 32   | 39   | 16   | 21   | 47   | 29   | 23   | 33   | 44   | 24   | 22   | 63   | 53   | 44   | 42   | 36   | 38   | 36   | 44   | 33   | 37   | 22   | 19   | Clec3b   |
| Clec4a1  | 46   | 47   | 52   | 65   | 44   | 52   | 66   | 85   | 101  | 98   | 106  | 99   | 128  | 83   | 49   | 58   | 64   | 55   | 36   | 54   | 48   | 115  | 144  | 78   | 88   | 99   | 116  | 108  | Clec4a1  |
| Clec4a2  | 17   | 19   | 22   | 10   | 7    | 21   | 17   | 60   | 65   | 45   | 57   | 43   | 35   | 53   | 32   | 16   | 9    | 19   | 18   | 25   | 14   | 80   | 91   | 59   | 56   | 68   | 56   | 52   | Clec4a2  |
| Clec4a3  | 10   | 16   | 6    | 8    | 10   | 22   | 16   | 32   | 36   | 14   | 46   | 18   | 22   | 22   | 13   | 19   | 8    | 13   | 16   | 9    | 7    | 42   | 48   | 27   | 34   | 10   | 38   | 25   | Clec4a3  |
| Clec4a4  | 0    | 0    | 0    | 0    | 0    | 3    | 0    | 0    | 0    | 0    | 5    | 0    | 0    | 0    | 0    | 1    | 0    | 0    | 0    | 0    | 0    | 0    | 2    | 0    | 0    | 6    | 0    | 0    | Clec4a4  |
| Clec4b1  | 0    | 0    | 0    | 0    | 0    | 0    | 0    | 0    | 1    | 0    | 0    | 0    | 0    | 1    | 0    | 0    | 0    | 0    | 0    | 0    | 0    | 2    | 1    | 0    | 0    | 0    | 0    | 0    | Clec4b1  |
| Clec4d   | 1    | 2    | 1    | 1    | 1    | 1    | 0    | 0    | 2    | 0    | 1    | 1    | 2    | 1    | 0    | 1    | 0    | 2    | 0    | 0    | 0    | 5    | 10   | 0    | 0    | 3    | 2    | 1    | Clec4d   |
| Clec4e   | 0    | 0    | 0    | 0    | 0    | 0    | 0    | 0    | 1    | 0    | 4    | 1    | 0    | 0    | 0    | 2    | 0    | 1    | 0    | 0    | 0    | 0    | 3    | 0    | 0    | 0    | 2    | 0    | Clec4e   |
| Clec4f   | 1    | 1    | 0    | 0    | 2    | 1    | 2    | 0    | 1    | 0    | 0    | 0    | 3    | 0    | 0    | 1    | 0    | 4    | 0</  |      |      |      |      |      |      |      |      |      |          |

|         |       |       |       |       |       |       |       |       |       |       |       |       |       |       |       |       |       |       |       |       |       |       |       |       |       |       |       |       |         |
|---------|-------|-------|-------|-------|-------|-------|-------|-------|-------|-------|-------|-------|-------|-------|-------|-------|-------|-------|-------|-------|-------|-------|-------|-------|-------|-------|-------|-------|---------|
| Cln3    | 758   | 893   | 851   | 999   | 1059  | 922   | 925   | 1036  | 1122  | 1198  | 1099  | 1073  | 1014  | 1155  | 719   | 762   | 1058  | 933   | 1072  | 830   | 944   | 1118  | 1126  | 1087  | 1200  | 1111  | 1149  | 1046  | Cln3    |
| Cln5    | 1965  | 1763  | 2021  | 1624  | 1280  | 1437  | 1285  | 1401  | 1470  | 1324  | 1613  | 1168  | 1644  | 1266  | 2149  | 2222  | 1592  | 1512  | 1167  | 1387  | 1227  | 1252  | 1666  | 1278  | 1087  | 1565  | 1519  | 1524  | Cln5    |
| Cln6    | 544   | 640   | 623   | 599   | 533   | 549   | 449   | 593   | 867   | 737   | 999   | 910   | 1620  | 796   | 512   | 639   | 679   | 535   | 489   | 462   | 487   | 730   | 944   | 909   | 677   | 1215  | 831   | 845   | Cln6    |
| Cln8    | 2937  | 3734  | 3125  | 3788  | 2912  | 3201  | 2825  | 1719  | 1879  | 1821  | 1883  | 1783  | 1895  | 1760  | 2803  | 3363  | 2992  | 3690  | 2929  | 2926  | 3168  | 1855  | 1952  | 1875  | 1914  | 1844  | 1728  | 1858  | Cln8    |
| Clnk    | 2     | 5     | 0     | 4     | 3     | 6     | 1     | 15    | 13    | 11    | 4     | 11    | 20    | 18    | 5     | 4     | 12    | 1     | 0     | 3     | 3     | 22    | 17    | 8     | 12    | 23    | 26    | 23    | Clnk    |
| Clns1a  | 8990  | 8032  | 8006  | 6830  | 6365  | 6328  | 7285  | 7061  | 6070  | 6133  | 5747  | 6862  | 6497  | 7261  | 8707  | 7843  | 7501  | 6713  | 6876  | 7618  | 7037  | 5955  | 5954  | 6513  | 6089  | 7906  | 6565  | 7729  | Clns1a  |
| Clock   | 5430  | 4171  | 2977  | 4183  | 5096  | 5282  | 5547  | 5766  | 5073  | 4367  | 4620  | 4154  | 4156  | 4457  | 5234  | 4644  | 3598  | 4299  | 4712  | 5562  | 5454  | 4642  | 5055  | 3721  | 4788  | 2868  | 4350  | 3966  | Clock   |
| Clp1    | 2473  | 2466  | 2438  | 2039  | 1276  | 1406  | 1646  | 1683  | 1341  | 1299  | 1342  | 1585  | 1597  | 1609  | 2325  | 2461  | 1910  | 1854  | 1509  | 1777  | 1417  | 1275  | 1287  | 1450  | 1279  | 1966  | 1770  | 1829  | Clp1    |
| Clpb    | 2352  | 2611  | 2093  | 2171  | 2279  | 2167  | 2178  | 2789  | 2985  | 2979  | 2739  | 2883  | 2538  | 2679  | 2284  | 2453  | 2308  | 2032  | 2288  | 2149  | 2247  | 2811  | 2779  | 2658  | 2810  | 2665  | 2869  | 2772  | Clpb    |
| Clpp    | 1851  | 2358  | 2083  | 2138  | 2050  | 1986  | 2128  | 1893  | 2258  | 2036  | 1856  | 2155  | 2109  | 2099  | 1875  | 1997  | 2313  | 1880  | 2214  | 2374  | 1877  | 1713  | 2106  | 2272  | 2211  | 2493  | 2296  | 2181  | Clpp    |
| Clps    | 0     | 1     | 0     | 0     | 0     | 1     | 0     | 0     | 0     | 0     | 0     | 0     | 0     | 0     | 0     | 0     | 0     | 2     | 0     | 0     | 0     | 0     | 3     | 0     | 0     | 0     | 0     | 0     | Clps    |
| Clpsl2  | 0     | 2     | 0     | 2     | 0     | 0     | 0     | 0     | 0     | 0     | 0     | 0     | 0     | 0     | 0     | 0     | 0     | 0     | 0     | 0     | 0     | 0     | 0     | 0     | 0     | 0     | 0     | 0     | Clpsl2  |
| Clptm1  | 7100  | 8629  | 6870  | 7910  | 7273  | 7390  | 6374  | 5591  | 6336  | 6072  | 5674  | 6046  | 5528  | 5174  | 6989  | 7650  | 7268  | 7579  | 7837  | 6316  | 7081  | 6782  | 6287  | 5661  | 6017  | 6094  | 5719  | 5563  | Clptm1  |
| Clptm1l | 5222  | 5537  | 5448  | 5074  | 5015  | 4981  | 5044  | 6089  | 6278  | 5900  | 6349  | 5983  | 6007  | 5649  | 5209  | 5288  | 5065  | 5214  | 5165  | 4336  | 5197  | 6400  | 6571  | 5983  | 6123  | 6161  | 6007  | 5866  | Clptm1l |
| Clpx    | 4136  | 3649  | 4035  | 3695  | 3285  | 3458  | 3836  | 3521  | 3167  | 3111  | 3195  | 3373  | 3125  | 3473  | 4246  | 3764  | 3804  | 3719  | 3500  | 3719  | 3578  | 3118  | 3293  | 3300  | 3042  | 3809  | 3253  | 3501  | Clpx    |
| Clrn1   | 57    | 46    | 16    | 17    | 77    | 23    | 18    | 122   | 98    | 60    | 88    | 17    | 56    | 20    | 55    | 57    | 20    | 34    | 26    | 28    | 35    | 90    | 130   | 27    | 58    | 32    | 13    | 11    | Clrn1   |
| Clrn2   | 3     | 3     | 9     | 4     | 6     | 5     | 2     | 9     | 7     | 6     | 3     | 5     | 16    | 6     | 9     | 2     | 7     | 9     | 5     | 3     | 2     | 12    | 3     | 16    | 3     | 12    | 7     | 1     | Clrn2   |
| Clrn3   | 0     | 0     | 0     | 0     | 2     | 0     | 0     | 0     | 0     | 0     | 0     | 0     | 0     | 0     | 3     | 1     | 0     | 0     | 0     | 0     | 0     | 2     | 0     | 0     | 0     | 0     | 0     | 0     | Clrn3   |
| Clspn   | 3749  | 3372  | 3801  | 3046  | 2528  | 3068  | 3310  | 4079  | 3934  | 3813  | 3514  | 5996  | 4576  | 6114  | 3186  | 2913  | 3582  | 2472  | 3024  | 3128  | 2833  | 2682  | 3300  | 4734  | 3931  | 6382  | 6340  | 6160  | Clspn   |
| Clstn1  | 10247 | 12899 | 15649 | 18159 | 21729 | 17609 | 15343 | 13454 | 16228 | 20324 | 18420 | 17017 | 16276 | 15539 | 11107 | 11983 | 17468 | 18190 | 20186 | 14193 | 17326 | 19019 | 16079 | 18694 | 19654 | 16557 | 14386 | 15075 | Clstn1  |
| Clstn2  | 912   | 727   | 414   | 972   | 2083  | 1459  | 1551  | 1536  | 1987  | 1821  | 2559  | 892   | 1054  | 899   | 936   | 938   | 680   | 1215  | 1120  | 1129  | 1568  | 1751  | 2016  | 879   | 1694  | 621   | 815   | 674   | Clstn2  |
| Clstn3  | 3405  | 4552  | 4353  | 6398  | 7497  | 6448  | 5803  | 4218  | 4799  | 5807  | 4858  | 4190  | 4288  | 3899  | 4013  | 3634  | 5677  | 6260  | 7128  | 5655  | 6398  | 6452  | 4306  | 4710  | 5752  | 3386  | 3828  | 3771  | Clstn3  |
| Clta    | 9322  | 10466 | 9715  | 10425 | 9116  | 8563  | 10026 | 7862  | 7721  | 8357  | 8339  | 7735  | 7608  | 8163  | 9357  | 8938  | 10109 | 9554  | 9504  | 9260  | 9906  | 7356  | 8220  | 8679  | 8178  | 8441  | 7459  | 8198  | Clta    |
| Cltb    | 2376  | 2826  | 2411  | 4032  | 4695  | 3386  | 3509  | 2158  | 2457  | 2796  | 2615  | 1742  | 1757  | 1840  | 2862  | 2622  | 3299  | 4260  | 3826  | 3498  | 4075  | 2981  | 2404  | 2200  | 2927  | 1514  | 1553  | 1652  | Cltb    |
| Cltc    | 54765 | 48405 | 40083 | 46393 | 48058 | 52562 | 53902 | 46179 | 42110 | 38983 | 40357 | 40135 | 41155 | 40781 | 55260 | 48678 | 43775 | 47852 | 47308 | 49103 | 54614 | 44623 | 42988 | 35688 | 41449 | 30696 | 41287 | 40282 | Cltc    |
| Cltrn   | 12    | 3     | 8     | 6     | 12    | 2     | 0     | 13    | 9     | 5     | 8     | 3     | 23    | 10    | 12    | 16    | 8     | 1     | 9     | 5     | 4     | 10    | 25    | 6     | 0     | 4     | 2     | 15    | Cltrn   |
| Clu     | 1123  | 1096  | 889   | 847   | 1102  | 1200  | 980   | 1196  | 1464  | 1538  | 1525  | 835   | 858   | 724   | 890   | 1226  | 788   | 1069  | 1130  | 1004  | 1146  | 1277  | 2049  | 1202  | 1108  | 1309  | 791   | 786   | Clu     |
| Cluap1  | 1070  | 1045  | 903   | 1082  | 1141  | 978   | 1245  | 1459  | 1299  | 1527  | 1245  | 1361  | 1253  | 1523  | 1109  | 829   | 956   | 989   | 1012  | 993   | 1179  | 1350  | 1242  | 1425  | 1349  | 1373  | 1296  | 1320  | Cluap1  |
| Cluh    | 6574  | 8167  | 8421  | 8251  | 7236  | 6713  | 6655  | 3057  | 4032  | 3881  | 4424  | 4183  | 4246  | 3960  | 6200  | 8753  | 8137  | 8009  | 7169  | 5410  | 6606  | 3810  | 4059  | 3934  | 3845  | 4100  | 3692  | 3907  | Cluh    |
| Clvs1   | 1529  | 1562  | 1660  | 1967  | 3063  | 2255  | 2646  | 3537  | 2812  | 3156  | 2625  | 3002  | 2893  | 3108  | 2164  | 1442  | 2049  | 2168  | 2593  | 2606  | 2859  | 4075  | 2719  | 2961  | 3561  | 2138  | 2959  | 3204  | Clvs1   |
| Clvs2   | 156   | 168   | 242   | 254   | 391   | 320   | 313   | 677   | 512   | 605   | 482   | 502   | 598   | 585   | 269   | 162   | 264   | 274   | 376   | 334   | 289   | 825   | 548   | 521   | 581   | 310   | 608   | 585   | Clvs2   |
| Clvbl   | 1099  | 1088  | 1338  | 925   | 709   | 859   | 910   | 1109  | 849   | 851   | 901   | 1166  | 1183  | 1278  | 1200  | 1131  | 1015  | 777   | 874   | 1175  | 906   | 1048  | 1117  | 984   | 948   | 1427  | 1525  | 1572  | Clvbl   |
| Cma1    | 0     | 0     | 0     | 2     | 7     | 4     | 0     | 17    | 37    | 47    | 25    | 8     | 1     | 5     | 0     | 2     | 0     | 14    | 7     | 1     | 0     | 7     | 61    | 26    | 19    | 4     | 2     | 1     | Cma1    |
| Cma2    | 0     | 0     | 0     | 4     | 0     | 0     | 0     | 0     | 1     | 0     | 0     | 0     | 0     | 0     | 0     | 0     | 1     | 0     | 0     | 0     | 0     | 0     | 2     | 1     | 0     | 0     | 0     | 0     | Cma2    |
| Cmah    | 23    | 47    | 35    | 20    | 35    | 41    | 36    | 73    | 93    | 74    | 109   | 66    | 86    | 73    | 45    | 53    | 29    | 65    | 28    | 59    | 29    | 53    | 119   | 53    | 62    | 56    | 71    | 75    | Cmah    |
| Cmas    | 6868  | 6322  | 6957  | 7169  | 7526  | 6842  | 8126  | 7458  | 6300  | 6422  | 6054  | 6331  | 5968  | 7473  | 7535  | 6329  | 7473  | 7080  | 7575  | 7981  | 7973  | 6963  | 6324  | 6738  | 7212  | 6429  | 6568  | 7226  | Cmas    |
| Cmb1    | 55    | 79    | 75    | 62    | 76    | 78    | 76    | 68    | 96    | 109   | 90    | 71    | 94    | 65    | 75    | 73    | 74    | 70    | 58    | 89    | 69    | 115   | 155   | 99    | 102   | 86    | 83    | 64    | Cmb1    |
| Cmc1    | 783   | 682   | 750   | 660   | 669   | 592   | 963   | 797   | 688   | 692   | 667   | 760   | 711   | 1013  | 779   | 544   | 721   | 752   | 701   | 829   | 884   | 702   | 758   | 820   | 677   | 792   | 705   | 922   | Cmc1    |
| Cmc2    | 1310  | 1477  | 1447  | 1327  | 1028  | 1018  | 1283  | 782   | 709   | 616   | 704   | 789   | 764   | 928   | 1240  | 1382  | 1293  | 1339  | 1234  | 1279  | 1160  | 521   | 674   | 722   | 684   | 970   | 758   | 953   | Cmc2    |
| Cmc4    | 376   | 276   | 410   | 367   | 403   | 432   | 487   | 482   | 447   | 484   | 562   | 508   | 464   | 530   | 410   | 347   | 368   | 410   | 451   | 430   | 461   | 521   | 419   | 610   | 519   | 607   | 536   | 566   | Cmc4    |
| Cmp     | 5124  | 6594  | 7887  | 9478  | 10890 | 8236  | 7657  | 5555  | 6354  | 9297  | 7530  | 7681  | 6382  | 6671  | 5012  | 5706  | 9258  | 10034 | 10731 | 6995  | 9044  | 9800  | 6121  | 8592  | 9474  | 7007  | 5799  | 6055  | Cmp     |
| Cmklr1  | 116   | 118   | 123   | 144   | 202   | 164   | 134   | 155   | 206   | 240   | 335   | 213   | 183   | 180   | 103   | 125   | 151   | 136   | 157   | 119   | 188   | 219   | 292   | 230   | 252   | 163   | 205   | 203   | Cmklr1  |
| Cmpk1   | 5248  | 4061  | 5095  | 5046  | 5872  | 5371  | 6080  | 9889  | 8106  | 7775  | 7949  | 8174  | 7905  | 8805  | 5918  | 4793  | 4869  | 4924  | 5217  | 5876  | 5672  | 9820  | 8515  | 8077  | 8623  | 8791  | 8125  | 9003  | Cmpk1   |
| Cmpk2   | 707   | 669   | 649   | 695   | 1225  | 941   | 1056  | 791   | 663   | 703   | 633   | 644   | 642   | 650   | 903   | 614   | 797   | 956   | 976   | 1080  | 972   | 820   | 724   | 623   | 694   | 734   | 660   | 744   | Cmpk2   |
| Cmss1   | 820   | 806   | 742   | 657   | 513   | 610   | 612   | 849   | 764   | 791   | 753   | 869   | 872   | 846   | 750   | 678   | 641   | 508   | 583   | 659   | 626   | 595   | 716   | 806   | 744   | 952   | 887   | 939   | Cmss1   |
| Cmtm1   | 0     | 0     | 0     | 0     | 0     | 0     | 0     | 0     | 1     | 0     | 0     | 0     | 0     | 0     | 0     | 1     | 0     | 0     | 0     | 0     | 0     | 0     | 0     | 0     | 0     | 0     | 0     | 0     | Cmtm1   |
| Cmtm2a  | 0     | 1     | 0     | 0     | 0     | 0     | 3     | 0     | 0     | 0     | 0     | 0     | 0     | 0     | 1     | 0     | 0     | 0     | 1     | 0     | 1     | 0     | 0     | 0     | 0     | 0     | 0     | 0     | Cmtm2a  |
| Cmtm2b  | 0     | 0     | 0     | 0     | 0     | 0     | 0     | 0     | 0     | 0     | 0     | 1     | 0     | 0     | 0     | 0     | 0     | 2     | 0     | 0     | 0     | 0     | 0     | 0     | 0     | 0     | 0     | 0     | Cmtm2b  |
| Cmtm3   | 1242  | 1245  | 1254  | 742   | 828   | 916   | 620   | 2252  | 3146  | 2381  | 3320  | 2222  | 2928  | 2122  | 1033  | 1402  | 1029  | 1030  | 697   | 667   | 659   | 1977  | 3543  | 2337  | 1902  | 3000  | 2574  | 2417  | Cmtm3   |
| Cmtm4   | 13487 | 12239 | 10277 | 12903 | 12191 | 13102 | 12867 | 7210  | 7209  | 7735  | 7157  | 7634  | 7316  | 7238  | 12597 | 12411 | 11356 | 12743 | 12772 | 11592 | 12628 | 5905  | 6916  | 7691  | 7036  | 5     |       |       |         |

|          |       |       |       |       |       |       |       |       |       |       |       |       |       |       |       |       |       |       |       |       |       |       |       |       |       |       |       |       |          |
|----------|-------|-------|-------|-------|-------|-------|-------|-------|-------|-------|-------|-------|-------|-------|-------|-------|-------|-------|-------|-------|-------|-------|-------|-------|-------|-------|-------|-------|----------|
| Cnn1     | 120   | 140   | 92    | 89    | 23    | 101   | 11    | 73    | 83    | 50    | 77    | 104   | 170   | 111   | 135   | 185   | 108   | 84    | 16    | 7     | 13    | 57    | 131   | 96    | 35    | 66    | 196   | 135   | Cnn1     |
| Cnn2     | 10395 | 11297 | 9563  | 4770  | 2808  | 5138  | 1743  | 4956  | 6983  | 5317  | 6932  | 6838  | 9835  | 5932  | 9264  | 14072 | 6809  | 6141  | 2474  | 2264  | 1873  | 3865  | 8031  | 6167  | 3674  | 8613  | 8458  | 7204  | Cnn2     |
| Cnn3     | 30336 | 31797 | 29305 | 25899 | 23498 | 25156 | 24620 | 30616 | 29683 | 26665 | 27988 | 30573 | 30598 | 30126 | 31389 | 34063 | 28238 | 24678 | 25287 | 29520 | 24206 | 25716 | 31088 | 28602 | 25630 | 38623 | 32189 | 32551 | Cnn3     |
| Cnnm1    | 197   | 141   | 179   | 222   | 399   | 313   | 248   | 247   | 261   | 403   | 323   | 150   | 172   | 150   | 175   | 169   | 210   | 263   | 308   | 275   | 335   | 236   | 260   | 250   | 247   | 206   | 136   | 104   | Cnnm1    |
| Cnnm2    | 1723  | 2158  | 1881  | 2237  | 2247  | 1951  | 1943  | 884   | 892   | 1145  | 1102  | 980   | 962   | 899   | 1865  | 2081  | 2063  | 2409  | 2158  | 1638  | 2131  | 1125  | 909   | 919   | 1079  | 543   | 946   | 870   | Cnnm2    |
| Cnnm3    | 2317  | 2813  | 3127  | 3540  | 3413  | 3158  | 3272  | 2231  | 2304  | 2746  | 2651  | 2811  | 2565  | 2951  | 2354  | 2512  | 3356  | 3537  | 3397  | 2603  | 3461  | 2864  | 2288  | 2931  | 2971  | 2888  | 2583  | 2705  | Cnnm3    |
| Cnnm4    | 2103  | 2439  | 2649  | 3295  | 2684  | 2443  | 2567  | 655   | 833   | 972   | 1004  | 960   | 889   | 927   | 2022  | 2471  | 2936  | 3379  | 2689  | 1813  | 2765  | 876   | 772   | 1004  | 899   | 1121  | 850   | 926   | Cnnm4    |
| Cnot1    | 34800 | 32915 | 20175 | 23345 | 23762 | 27425 | 27598 | 33352 | 29722 | 23800 | 24496 | 28063 | 26771 | 28166 | 33230 | 29918 | 21667 | 23343 | 23605 | 30135 | 27605 | 22264 | 27965 | 22081 | 24916 | 19537 | 30386 | 27098 | Cnot1    |
| Cnot10   | 8980  | 9456  | 6900  | 7561  | 6895  | 7114  | 7445  | 7058  | 7215  | 6700  | 6910  | 6962  | 6645  | 6867  | 8625  | 8553  | 6831  | 7311  | 7297  | 8060  | 7256  | 6557  | 6963  | 6365  | 6312  | 6352  | 7358  | 6986  | Cnot10   |
| Cnot11   | 3809  | 3313  | 3532  | 3362  | 3256  | 3030  | 3252  | 2989  | 2974  | 2909  | 2775  | 3410  | 2865  | 3065  | 3429  | 3576  | 3466  | 3311  | 3282  | 2991  | 3220  | 3034  | 2960  | 3383  | 3066  | 3905  | 2936  | 3348  | Cnot11   |
| Cnot2    | 6905  | 5686  | 6444  | 5884  | 5800  | 5959  | 6620  | 11057 | 9323  | 8902  | 8564  | 9245  | 9208  | 9718  | 7100  | 6309  | 6434  | 5384  | 6010  | 6282  | 6156  | 9621  | 9088  | 9277  | 8689  | 10408 | 9618  | 10030 | Cnot2    |
| Cnot3    | 4850  | 5630  | 5863  | 6353  | 5565  | 5172  | 5108  | 5191  | 5494  | 6488  | 6016  | 7311  | 6016  | 6846  | 4334  | 4787  | 6146  | 6015  | 6318  | 4229  | 5366  | 6316  | 5141  | 6865  | 6817  | 7557  | 6250  | 6457  | Cnot3    |
| Cnot4    | 3160  | 3105  | 3191  | 3313  | 3272  | 2869  | 3351  | 3665  | 3349  | 3262  | 3014  | 3169  | 3159  | 3317  | 3265  | 2984  | 3189  | 3285  | 3074  | 3195  | 3138  | 3711  | 3147  | 3255  | 3329  | 3558  | 3353  | 3440  | Cnot4    |
| Cnot6    | 18589 | 12591 | 18242 | 17563 | 19046 | 20496 | 21071 | 24119 | 21204 | 21939 | 22894 | 28279 | 25975 | 28884 | 18213 | 15389 | 17712 | 17850 | 18937 | 17477 | 19842 | 24401 | 20542 | 23883 | 25141 | 25972 | 28023 | 28544 | Cnot6    |
| Cnot6l   | 6273  | 4384  | 5427  | 6261  | 6905  | 7340  | 7420  | 6625  | 5906  | 5598  | 6733  | 5870  | 6078  | 6308  | 5649  | 5355  | 5457  | 6560  | 6551  | 5730  | 7621  | 6291  | 5998  | 5583  | 6085  | 5027  | 5751  | 5868  | Cnot6l   |
| Cnot7    | 12209 | 9094  | 12021 | 12095 | 12470 | 12165 | 14797 | 16203 | 13030 | 14309 | 13840 | 16706 | 14561 | 18191 | 12242 | 10129 | 12388 | 12481 | 12608 | 12756 | 13643 | 16476 | 13024 | 16096 | 16280 | 17055 | 16338 | 17463 | Cnot7    |
| Cnot8    | 3676  | 3715  | 3846  | 3764  | 3769  | 3526  | 4051  | 4995  | 4598  | 4470  | 4135  | 4985  | 4329  | 5191  | 3790  | 3434  | 3913  | 3715  | 4102  | 3864  | 3896  | 4978  | 4275  | 5125  | 4270  | 5285  | 4724  | 5067  | Cnot8    |
| Cnot9    | 6771  | 6265  | 6404  | 6068  | 5658  | 5920  | 6715  | 7068  | 6446  | 6410  | 6170  | 7941  | 7250  | 8522  | 6166  | 5698  | 6528  | 5838  | 6483  | 6152  | 6482  | 6490  | 6097  | 7414  | 6820  | 9150  | 8085  | 9044  | Cnot9    |
| Cnp      | 1189  | 1217  | 1213  | 933   | 1195  | 1119  | 949   | 1031  | 1180  | 1114  | 1069  | 921   | 987   | 840   | 1299  | 1218  | 1061  | 1040  | 1034  | 1003  | 998   | 1056  | 1197  | 885   | 1016  | 1005  | 933   | 795   | Cnp      |
| Cnppd1   | 3403  | 4125  | 4361  | 4651  | 4808  | 4094  | 4305  | 3318  | 3435  | 3883  | 3636  | 3863  | 3936  | 3612  | 3603  | 3713  | 4731  | 4774  | 4955  | 4028  | 4370  | 4127  | 3476  | 3992  | 4131  | 3984  | 3763  | 3853  | Cnppd1   |
| Cnpy1    | 3520  | 3487  | 5250  | 3905  | 3023  | 4056  | 855   | 5019  | 3428  | 3837  | 2756  | 5757  | 8869  | 5141  | 2972  | 5658  | 4890  | 2588  | 3869  | 4661  | 2761  | 5401  | 3744  | 2589  | 5233  | 404   | 7792  | 6451  | Cnpy1    |
| Cnpy2    | 2580  | 2492  | 2925  | 2281  | 2141  | 2167  | 2086  | 3673  | 3633  | 3446  | 3734  | 3467  | 3801  | 3963  | 2920  | 2558  | 2624  | 2025  | 2243  | 2460  | 2298  | 3016  | 3880  | 3826  | 2315  | 4230  | 3918  | 4143  | Cnpy2    |
| Cnpy3    | 2182  | 2555  | 2186  | 2329  | 2053  | 2222  | 2058  | 1804  | 2118  | 1900  | 1983  | 2057  | 2064  | 1852  | 2103  | 2226  | 2168  | 2113  | 2221  | 2149  | 2090  | 1905  | 2289  | 1995  | 1893  | 2115  | 1952  | 1946  | Cnpy3    |
| Cnpy4    | 2343  | 2009  | 2877  | 1990  | 1881  | 1974  | 1975  | 3270  | 2801  | 2825  | 3111  | 3245  | 3185  | 3444  | 2197  | 2044  | 2458  | 1808  | 2057  | 2172  | 1657  | 2938  | 3010  | 3322  | 2934  | 3946  | 3362  | 3458  | Cnpy4    |
| Cnr1     | 2506  | 2371  | 1934  | 3927  | 6633  | 6138  | 6850  | 10453 | 9711  | 9293  | 8161  | 7960  | 9217  | 8730  | 3642  | 2294  | 3242  | 4250  | 5760  | 6469  | 6293  | 9725  | 8587  | 8798  | 11677 | 6132  | 7030  | 6912  | Cnr1     |
| Cnr2     | 29    | 33    | 23    | 18    | 26    | 34    | 21    | 18    | 27    | 10    | 23    | 27    | 39    | 26    | 33    | 36    | 25    | 22    | 21    | 26    | 23    | 12    | 34    | 17    | 19    | 35    | 44    | 28    | Cnr2     |
| Cnrp1    | 741   | 627   | 582   | 850   | 1547  | 1306  | 1354  | 2020  | 2053  | 1917  | 1809  | 1413  | 1433  | 1558  | 909   | 681   | 753   | 1062  | 1258  | 1307  | 1359  | 2388  | 2062  | 1714  | 2119  | 1385  | 1282  | 1388  | Cnrp1    |
| Cnst     | 4036  | 4179  | 4129  | 4966  | 5088  | 4813  | 4630  | 3965  | 3881  | 4212  | 4234  | 4000  | 3949  | 4032  | 4187  | 4199  | 4486  | 4938  | 5160  | 4280  | 4871  | 4660  | 3633  | 4299  | 4347  | 3816  | 3909  | 4020  | Cnst     |
| Cntd1    | 115   | 95    | 140   | 90    | 63    | 125   | 77    | 137   | 120   | 115   | 138   | 141   | 149   | 159   | 99    | 111   | 74    | 84    | 83    | 73    | 85    | 115   | 109   | 127   | 108   | 133   | 163   | 114   | Cntd1    |
| Cntf     | 39    | 41    | 56    | 42    | 41    | 45    | 48    | 39    | 30    | 41    | 39    | 42    | 57    | 53    | 54    | 21    | 50    | 29    | 43    | 55    | 43    | 23    | 34    | 38    | 42    | 40    | 50    | 42    | Cntf     |
| Cntfr    | 3676  | 5288  | 6469  | 5920  | 5691  | 5356  | 3956  | 3209  | 3687  | 4360  | 3896  | 5353  | 4780  | 4367  | 3940  | 4879  | 6470  | 5919  | 6353  | 4069  | 4885  | 4234  | 3451  | 4854  | 4354  | 4789  | 4635  | 4379  | Cntfr    |
| Cntln    | 2493  | 1861  | 1941  | 1741  | 1662  | 2223  | 1914  | 3791  | 3515  | 2991  | 3234  | 3621  | 3523  | 3672  | 2393  | 2340  | 1735  | 1768  | 1538  | 2068  | 1699  | 2714  | 3425  | 3003  | 2991  | 3386  | 3844  | 3445  | Cntln    |
| Cntn1    | 1223  | 1318  | 1209  | 1405  | 2955  | 1942  | 2075  | 2146  | 2273  | 2058  | 1874  | 1115  | 1471  | 1133  | 1776  | 1407  | 1274  | 2012  | 1879  | 2199  | 2132  | 2784  | 2455  | 1285  | 2141  | 627   | 1103  | 1037  | Cntn1    |
| Cntn2    | 7623  | 10766 | 14810 | 16384 | 23316 | 18631 | 14626 | 17154 | 19033 | 26298 | 21619 | 25417 | 30991 | 23814 | 11036 | 12196 | 17985 | 18343 | 21111 | 12991 | 19262 | 29335 | 17416 | 24329 | 32969 | 10181 | 24575 | 26285 | Cntn2    |
| Cntn3    | 308   | 310   | 284   | 499   | 740   | 550   | 579   | 451   | 671   | 570   | 751   | 470   | 412   | 434   | 398   | 340   | 337   | 614   | 538   | 448   | 614   | 730   | 724   | 525   | 680   | 288   | 359   | 411   | Cntn3    |
| Cntn4    | 498   | 416   | 240   | 486   | 1023  | 532   | 593   | 1081  | 928   | 889   | 989   | 346   | 469   | 327   | 491   | 469   | 304   | 600   | 535   | 715   | 641   | 1063  | 998   | 586   | 614   | 348   | 352   | 341   | Cntn4    |
| Cntn5    | 311   | 360   | 247   | 368   | 516   | 471   | 479   | 576   | 570   | 490   | 485   | 324   | 313   | 398   | 276   | 315   | 418   | 372   | 520   | 459   | 488   | 557   | 384   | 591   | 159   | 334   | 306   | Cntn5 |          |
| Cntn6    | 381   | 308   | 294   | 333   | 434   | 401   | 409   | 488   | 492   | 392   | 406   | 342   | 269   | 397   | 339   | 295   | 309   | 380   | 365   | 492   | 448   | 560   | 456   | 415   | 493   | 321   | 373   | 451   | Cntn6    |
| Cntnap1  | 346   | 433   | 519   | 664   | 1027  | 705   | 549   | 339   | 444   | 549   | 657   | 326   | 361   | 272   | 434   | 404   | 601   | 908   | 626   | 552   | 599   | 712   | 519   | 350   | 452   | 246   | 317   | 228   | Cntnap1  |
| Cntnap2  | 11870 | 11604 | 11365 | 13527 | 12827 | 13701 | 16290 | 9449  | 8559  | 8190  | 6828  | 11486 | 7418  | 12118 | 12890 | 8542  | 12614 | 12775 | 14572 | 15949 | 14449 | 8968  | 7587  | 9797  | 10191 | 13329 | 11321 | 11796 | Cntnap2  |
| Cntnap3  | 51    | 48    | 9     | 80    | 106   | 65    | 131   | 126   | 227   | 142   | 194   | 148   | 2     | 181   | 54    | 15    | 49    | 64    | 108   | 98    | 167   | 155   | 153   | 200   | 249   | 136   | 117   | 100   | Cntnap3  |
| Cntnap4  | 486   | 523   | 357   | 734   | 1488  | 1131  | 1229  | 1071  | 1237  | 1169  | 1107  | 640   | 561   | 674   | 618   | 363   | 574   | 1061  | 1144  | 1448  | 1404  | 1419  | 1418  | 768   | 1311  | 440   | 531   | 502   | Cntnap4  |
| Cntnap5a | 468   | 549   | 271   | 634   | 1211  | 1027  | 898   | 1114  | 968   | 921   | 936   | 471   | 644   | 465   | 704   | 558   | 480   | 832   | 777   | 1137  | 1073  | 1340  | 1040  | 426   | 963   | 152   | 525   | 478   | Cntnap5a |
| Cntnap5b | 194   | 172   | 57    | 166   | 311   | 330   | 276   | 350   | 301   | 289   | 273   | 156   | 184   | 162   | 237   | 188   | 126   | 173   | 215   | 338   | 400   | 256   | 318   | 158   | 272   | 31    | 187   | 136   | Cntnap5b |
| Cntnap5c | 54    | 68    | 13    | 74    | 142   | 154   | 145   | 143   | 101   | 129   | 115   | 70    | 95    | 95    | 76    | 72    | 35    | 70    | 86    | 146   | 186   | 95    | 111   | 50    | 135   | 7     | 89    | 57    | Cntnap5c |
| Cntrl    | 7108  | 6740  | 5205  | 5165  | 4607  | 5713  | 5547  | 7866  | 7434  | 6393  | 6597  | 8681  | 7622  | 8944  | 6622  | 6432  | 5501  | 4638  | 4737  | 6107  | 5449  | 5294  | 6359  | 6687  | 6313  | 9885  | 7637  | Cntrl |          |
| Cntrob   | 3700  | 4311  | 4901  | 5124  | 4576  | 4307  | 4638  | 3811  | 4120  | 4948  | 4392  | 6059  | 4910  | 5832  | 3572  | 3794  | 5475  | 4916  | 4942  | 4112  | 4459  | 4223  | 3708  | 5522  |       |       |       |       |          |



|         |       |       |       |       |       |       |       |       |       |       |        |       |       |       |       |       |       |       |       |       |       |        |       |       |       |       |       |         |          |
|---------|-------|-------|-------|-------|-------|-------|-------|-------|-------|-------|--------|-------|-------|-------|-------|-------|-------|-------|-------|-------|-------|--------|-------|-------|-------|-------|-------|---------|----------|
| Col20a1 | 465   | 590   | 432   | 701   | 555   | 429   | 466   | 227   | 301   | 287   | 517    | 192   | 235   | 184   | 498   | 612   | 535   | 757   | 475   | 390   | 443   | 324    | 390   | 199   | 177   | 122   | 149   | 182     | Col20a1  |
| Col22a1 | 885   | 1288  | 1419  | 1276  | 1640  | 1205  | 1417  | 1439  | 1711  | 1380  | 1643   | 1502  | 1225  | 1467  | 1233  | 985   | 1315  | 1510  | 1411  | 1708  | 1408  | 2015   | 1867  | 1516  | 1757  | 1567  | 1507  | 1544    | Col22a1  |
| Col23a1 | 3147  | 2911  | 3491  | 2053  | 1799  | 1996  | 1154  | 2120  | 3470  | 2677  | 3689   | 2862  | 3780  | 2517  | 2614  | 4038  | 2300  | 2126  | 1249  | 1735  | 1362  | 2794   | 3585  | 2385  | 2077  | 2543  | 3142  | 2516    | Col23a1  |
| Col24a1 | 435   | 375   | 319   | 202   | 207   | 275   | 113   | 342   | 628   | 521   | 1120   | 292   | 401   | 243   | 378   | 570   | 243   | 332   | 125   | 119   | 121   | 386    | 851   | 397   | 368   | 253   | 243   | 244     | Col24a1  |
| Col25a1 | 2535  | 1285  | 1203  | 1375  | 1773  | 1825  | 1836  | 2265  | 2782  | 1972  | 3397   | 1320  | 1649  | 1348  | 1891  | 2476  | 1271  | 1730  | 1657  | 1432  | 1972  | 2525   | 2487  | 1648  | 1847  | 1098  | 1549  | 1297    | Col25a1  |
| Col26a1 | 8202  | 8528  | 7983  | 5144  | 3165  | 5206  | 1892  | 6593  | 10317 | 7136  | 11136  | 6096  | 10020 | 5723  | 6649  | 10895 | 5268  | 5975  | 2664  | 2406  | 2007  | 5782   | 11567 | 7863  | 5173  | 9106  | 7180  | 6713    | Col26a1  |
| Col27a1 | 2014  | 1849  | 2232  | 1666  | 1159  | 1674  | 875   | 2359  | 4567  | 5199  | 7943   | 2039  | 3161  | 1814  | 1557  | 2524  | 1837  | 1805  | 1217  | 958   | 839   | 4002   | 3875  | 4135  | 3025  | 3003  | 2274  | 1951    | Col27a1  |
| Col28a1 | 36    | 24    | 17    | 13    | 160   | 44    | 30    | 129   | 201   | 104   | 228    | 15    | 62    | 17    | 37    | 20    | 86    | 31    | 44    | 55    | 257   | 137    | 29    | 139   | 31    | 21    | 23    | Col28a1 |          |
| Col2a1  | 13352 | 19669 | 21029 | 16046 | 9945  | 19787 | 6002  | 14480 | 34820 | 38353 | 70390  | 19930 | 28354 | 15384 | 14068 | 24464 | 16807 | 18225 | 11980 | 6905  | 6211  | 45388  | 24324 | 29218 | 29322 | 28321 | 22486 | 17899   | Col2a1   |
| Col3a1  | 50497 | 54706 | 63777 | 42514 | 24020 | 49470 | 15678 | 50006 | 69478 | 65298 | 119396 | 65751 | 84662 | 49538 | 67155 | 41354 | 56667 | 20287 | 21227 | 15598 | 57824 | 109383 | 70063 | 57427 | 70628 | 69910 | 61638 | Col3a1  |          |
| Col4a1  | 20677 | 27288 | 37681 | 25302 | 26934 | 25885 | 19708 | 18309 | 24531 | 31014 | 36331  | 34944 | 39551 | 30744 | 19697 | 31263 | 28154 | 28380 | 23944 | 17187 | 21260 | 27616  | 29005 | 34689 | 29513 | 36887 | 33484 | 30769   | Col4a1   |
| Col4a2  | 14626 | 20236 | 26074 | 17774 | 17677 | 17554 | 12103 | 11453 | 15748 | 20479 | 22787  | 22237 | 25175 | 18817 | 13440 | 22534 | 19675 | 20400 | 16172 | 11517 | 13274 | 18539  | 18258 | 22470 | 19362 | 24931 | 22430 | 19630   | Col4a2   |
| Col4a3  | 14    | 13    | 7     | 5     | 34    | 29    | 20    | 29    | 39    | 38    | 47     | 30    | 50    | 37    | 25    | 36    | 9     | 33    | 24    | 20    | 17    | 35     | 63    | 20    | 47    | 11    | 30    | 21      | Col4a3   |
| Col4a4  | 104   | 67    | 87    | 63    | 88    | 101   | 104   | 84    | 101   | 135   | 115    | 129   | 109   | 114   | 94    | 82    | 85    | 99    | 88    | 75    | 121   | 58     | 109   | 86    | 132   | 70    | 66    | 80      | Col4a4   |
| Col4a5  | 3425  | 3571  | 3592  | 2783  | 3500  | 3512  | 2704  | 3243  | 3728  | 3296  | 3962   | 3568  | 4295  | 3397  | 3371  | 3923  | 3195  | 3422  | 2980  | 3627  | 2798  | 3008   | 4501  | 3262  | 3243  | 2561  | 3741  | 3300    | Col4a5   |
| Col4a6  | 29    | 58    | 47    | 59    | 84    | 85    | 63    | 46    | 62    | 35    | 84     | 43    | 75    | 54    | 53    | 65    | 56    | 51    | 51    | 76    | 64    | 30     | 52    | 47    | 68    | 41    | 67    | 62      | Col4a6   |
| Col5a1  | 11037 | 13826 | 14287 | 9842  | 6380  | 11818 | 3596  | 8783  | 15708 | 14625 | 27671  | 12926 | 17352 | 11672 | 9877  | 16756 | 11283 | 13804 | 5358  | 3942  | 3841  | 13994  | 22489 | 14931 | 12418 | 12243 | 13462 | 11576   | Col5a1   |
| Col5a2  | 16246 | 16326 | 17238 | 12721 | 7162  | 16616 | 5307  | 15807 | 22209 | 19266 | 29006  | 19956 | 25776 | 19349 | 16456 | 21431 | 13041 | 17241 | 7029  | 7446  | 5322  | 18478  | 31732 | 21919 | 19243 | 19813 | 22718 | 20425   | Col5a2   |
| Col5a3  | 205   | 290   | 247   | 176   | 179   | 201   | 68    | 116   | 259   | 179   | 406    | 100   | 248   | 131   | 212   | 347   | 234   | 193   | 99    | 92    | 92    | 284    | 389   | 127   | 168   | 117   | 151   | 129     | Col5a3   |
| Col6a1  | 4532  | 5133  | 4507  | 3807  | 2701  | 5952  | 1371  | 4711  | 8979  | 6726  | 15189  | 5162  | 7406  | 4585  | 4163  | 6122  | 3456  | 6090  | 2307  | 1953  | 1667  | 6129   | 13674 | 6174  | 5470  | 3735  | 5326  | 4466    | Col6a1   |
| Col6a2  | 5210  | 6200  | 5366  | 4570  | 3201  | 6314  | 1373  | 5337  | 9516  | 7611  | 14729  | 5925  | 8405  | 5281  | 4981  | 6918  | 4304  | 6707  | 2614  | 1808  | 1864  | 6868   | 13986 | 7391  | 6015  | 4767  | 6596  | 5478    | Col6a2   |
| Col6a3  | 7273  | 7275  | 4627  | 6196  | 4073  | 8355  | 2094  | 7334  | 11926 | 12547 | 22805  | 8287  | 11083 | 7785  | 5458  | 8564  | 4784  | 10071 | 2865  | 2461  | 2372  | 10288  | 17026 | 10292 | 9760  | 4862  | 8164  | 7355    | Col6a3   |
| Col6a4  | 58    | 61    | 34    | 53    | 47    | 71    | 83    | 92    | 119   | 81    | 95     | 96    | 68    | 74    | 40    | 30    | 45    | 56    | 60    | 75    | 77    | 117    | 72    | 86    | 79    | 76    | 91    | 74      | Col6a4   |
| Col6a5  | 18    | 18    | 10    | 48    | 42    | 66    | 51    | 48    | 59    | 77    | 91     | 47    | 23    | 53    | 26    | 18    | 35    | 26    | 29    | 81    | 46    | 77     | 65    | 65    | 81    | 33    | 29    | 27      | Col6a5   |
| Col6a6  | 112   | 110   | 93    | 109   | 61    | 66    | 38    | 112   | 294   | 260   | 1255   | 136   | 252   | 133   | 90    | 139   | 81    | 84    | 47    | 73    | 52    | 197    | 1300  | 192   | 85    | 174   | 196   | 184     | Col6a6   |
| Col7a1  | 1374  | 1231  | 1594  | 1113  | 936   | 1270  | 773   | 1165  | 1908  | 1453  | 1370   | 1114  | 1514  | 1057  | 960   | 1423  | 1220  | 1468  | 1067  | 702   | 774   | 652    | 1718  | 1651  | 757   | 993   | 1124  | 1104    | Col7a1   |
| Col8a1  | 1209  | 991   | 683   | 741   | 456   | 1887  | 127   | 2804  | 3703  | 2651  | 4232   | 2204  | 2484  | 2157  | 1312  | 1496  | 671   | 1900  | 254   | 152   | 113   | 2070   | 4554  | 3046  | 2014  | 1833  | 1918  | 1943    | Col8a1   |
| Col8a2  | 5090  | 7224  | 6187  | 3943  | 1699  | 4519  | 497   | 3480  | 5264  | 5712  | 7671   | 5148  | 7400  | 4740  | 5625  | 8844  | 4704  | 5439  | 898   | 607   | 496   | 6184   | 7449  | 5348  | 5324  | 5852  | 5919  | 5294    | Col8a2   |
| Col9a1  | 2148  | 2204  | 2010  | 1460  | 541   | 2395  | 177   | 2788  | 9372  | 7335  | 15830  | 1429  | 3309  | 1327  | 2342  | 3883  | 1197  | 2013  | 760   | 156   | 145   | 8300   | 6091  | 4707  | 4529  | 3171  | 1755  | 1345    | Col9a1   |
| Col9a2  | 1419  | 1779  | 1318  | 1562  | 1201  | 1693  | 534   | 2312  | 5530  | 5610  | 10252  | 1420  | 2665  | 1332  | 1576  | 2244  | 1224  | 1958  | 935   | 585   | 558   | 5700   | 4293  | 3840  | 3534  | 2711  | 1936  | 1335    | Col9a2   |
| Col9a3  | 1550  | 2135  | 1147  | 2354  | 2027  | 3771  | 973   | 3109  | 9709  | 8793  | 15504  | 2246  | 4018  | 1910  | 1880  | 2223  | 1418  | 3057  | 2040  | 711   | 958   | 9690   | 7288  | 5307  | 6362  | 2918  | 2121  | 1508    | Col9a3   |
| Colca2  | 31    | 40    | 40    | 17    | 26    | 22    | 20    | 92    | 76    | 87    | 82     | 56    | 64    | 55    | 24    | 26    | 32    | 14    | 16    | 22    | 28    | 28     | 113   | 87    | 44    | 80    | 50    | 44      | Colca2   |
| Colec10 | 13    | 0     | 0     | 2     | 1     | 6     | 1     | 9     | 18    | 8     | 44     | 0     | 3     | 0     | 1     | 5     | 1     | 0     | 0     | 0     | 2     | 8      | 12    | 10    | 0     | 12    | 8     | 2       | Colec10  |
| Colec11 | 14    | 22    | 20    | 18    | 29    | 28    | 37    | 16    | 14    | 15    | 28     | 11    | 19    | 14    | 20    | 22    | 14    | 37    | 28    | 35    | 36    | 15     | 43    | 19    | 18    | 18    | 34    | 11      | Colec11  |
| Colec12 | 5771  | 5924  | 8200  | 3375  | 2972  | 4235  | 2306  | 4680  | 5555  | 4649  | 6035   | 6072  | 7699  | 5675  | 6504  | 8417  | 4543  | 4145  | 2518  | 3914  | 2573  | 5571   | 7684  | 4735  | 4490  | 5263  | 7349  | 6273    | Collec12 |
| Colgal1 | 7450  | 7746  | 6975  | 6701  | 6718  | 6458  | 5680  | 6057  | 7204  | 6250  | 7858   | 5990  | 6624  | 5605  | 7280  | 7797  | 6630  | 7038  | 6050  | 5930  | 5874  | 6600   | 7567  | 6096  | 6421  | 6324  | 6333  | 5822    | Colgal1  |
| Colgal2 | 392   | 416   | 334   | 326   | 442   | 346   | 464   | 414   | 468   | 641   | 285    | 380   | 229   | 434   | 477   | 350   | 377   | 310   | 446   | 323   | 578   | 513    | 355   | 400   | 321   | 302   | 278   | Colgal2 |          |
| Colq    | 27    | 22    | 9     | 19    | 29    | 12    | 13    | 21    | 23    | 23    | 116    | 10    | 17    | 6     | 12    | 20    | 8     | 21    | 10    | 5     | 15    | 106    | 22    | 14    | 8     | 9     | 7     | Colq    |          |
| Comm1   | 471   | 472   | 339   | 466   | 324   | 250   | 496   | 479   | 300   | 355   | 329    | 395   | 374   | 709   | 451   | 329   | 392   | 294   | 327   | 403   | 505   | 373    | 351   | 583   | 397   | 428   | 347   | 636     | Comm1    |
| Comm10  | 2459  | 2153  | 2504  | 1885  | 1627  | 1873  | 1884  | 2276  | 1956  | 1960  | 1856   | 2414  | 2417  | 2582  | 2385  | 2150  | 2015  | 1666  | 1707  | 1987  | 1894  | 2015   | 2001  | 2081  | 1981  | 2782  | 2556  | 3021    | Comm10   |
| Comm2   | 2347  | 2348  | 2053  | 2171  | 2297  | 2284  | 2407  | 2555  | 2235  | 1894  | 2073   | 2342  | 2333  | 2299  | 2523  | 2252  | 1805  | 2065  | 2227  | 2874  | 2429  | 1937   | 2234  | 2049  | 2404  | 2442  | 2407  | 2373    | Comm2    |
| Comm3   | 2718  | 2425  | 2322  | 2543  | 2708  | 2618  | 3302  | 3856  | 3629  | 3475  | 3373   | 3116  | 2901  | 3513  | 2908  | 2523  | 2456  | 2563  | 2632  | 3001  | 3107  | 3243   | 3719  | 3452  | 3471  | 3414  | 2937  | 3258    | Comm3    |
| Comm4   | 1679  | 2153  | 2018  | 2208  | 2470  | 2198  | 2267  | 2519  | 2809  | 2869  | 2835   | 2899  | 2649  | 2792  | 1854  | 1767  | 2293  | 2141  | 2427  | 2704  | 2257  | 2652   | 2818  | 3132  | 3207  | 2999  | 2975  | 2804    | Comm4    |
| Comm5   | 25    | 19    | 40    | 23    | 11    | 23    | 23    | 11    | 16    | 15    | 11     | 21    | 8     | 12    | 25    | 13    | 30    | 25    | 18    | 27    | 29    | 23     | 23    | 29    | 12    | 16    | 3     | 31      | Comm5    |
| Comm6   | 2275  | 2284  | 2888  | 2584  | 2235  | 2125  | 2645  | 2010  | 1864  | 1925  | 1920   | 2096  | 2121  | 2507  | 2407  | 2317  | 2602  | 2403  | 2370  | 2649  | 2489  | 1811   | 1933  | 2368  | 2037  | 2390  | 2188  | 2447    | Comm6    |
| Comm7   | 1709  | 1888  | 1938  | 1938  | 2160  | 1989  | 2053  | 2751  | 2661  | 2696  | 2613   | 2713  | 2505  | 2703  | 1738  | 1678  | 1960  | 1841  | 2170  | 2202  | 2107  | 2695   | 2697  | 2842  | 2885  | 2921  | 2632  | 2824    | Comm7    |
| Comm8   | 3821  | 3471  | 4022  | 3629  | 3499  | 3301  | 4446  | 4010  | 3360  | 2996  | 3086   | 3531  | 3458  | 4106  | 4230  | 3565  | 4055  | 3758  | 3550  | 4378  | 3936  | 3166   | 3390  | 3760  | 3237  | 4072  | 3801  | 4230    | Comm8    |
| Comm9   | 1436  | 1846  | 1298  | 1543  | 1474  | 1503  | 1621  | 1752  | 1897  | 1778  | 1671   | 1850  | 1783  | 1854  | 1536  | 1584  | 1     |       |       |       |       |        |       |       |       |       |       |         |          |

|          |       |       |       |       |       |       |       |       |       |       |       |       |       |       |       |       |       |       |       |       |       |       |       |       |       |       |       |       |          |       |
|----------|-------|-------|-------|-------|-------|-------|-------|-------|-------|-------|-------|-------|-------|-------|-------|-------|-------|-------|-------|-------|-------|-------|-------|-------|-------|-------|-------|-------|----------|-------|
| Coq8b    | 1076  | 1437  | 1363  | 1428  | 1436  | 1247  | 1336  | 1071  | 1158  | 1237  | 1112  | 1224  | 1134  | 1129  | 1026  | 1199  | 1505  | 1499  | 1624  | 1165  | 1350  | 1208  | 1139  | 1237  | 1257  | 1267  | 1146  | 1238  | Coq8b    |       |
| Coq9     | 1834  | 1927  | 1845  | 1810  | 1565  | 1720  | 1667  | 1801  | 1959  | 1809  | 1987  | 2065  | 1920  | 2003  | 1698  | 1777  | 1957  | 1813  | 1657  | 1557  | 1671  | 1870  | 2141  | 2070  | 1781  | 2071  | 2007  | 1920  | Coq9     |       |
| Corin    | 414   | 569   | 550   | 371   | 393   | 346   | 184   | 749   | 649   | 525   | 1124  | 525   | 1317  | 388   | 909   | 971   | 408   | 358   | 197   | 343   | 132   | 764   | 935   | 286   | 361   | 169   | 643   | 606   | Corin    |       |
| Coro1a   | 1732  | 1984  | 1808  | 1923  | 2392  | 2337  | 1844  | 1949  | 2214  | 1927  | 1844  | 1866  | 1776  | 1717  | 1611  | 1872  | 2133  | 1919  | 2707  | 2327  | 1992  | 2252  | 2273  | 1950  | 2325  | 1994  | 1909  | 1730  | Coro1a   |       |
| Coro1b   | 291   | 307   | 187   | 534   | 101   | 139   | 108   | 296   | 145   | 137   | 98    | 165   | 151   | 151   | 215   | 208   | 407   | 154   | 149   | 146   | 166   | 185   | 210   | 161   | 287   | 124   | 166   | 123   | Coro1b   |       |
| Coro1c   | 15756 | 20132 | 21668 | 22884 | 18125 | 18744 | 19042 | 9976  | 11567 | 12673 | 10946 | 15918 | 12462 | 15006 | 16313 | 17618 | 22540 | 21328 | 21039 | 16405 | 19526 | 12096 | 10389 | 14481 | 14746 | 16346 | 14440 | 15267 | Coro1c   |       |
| Coro2a   | 610   | 642   | 651   | 597   | 1037  | 657   | 603   | 706   | 704   | 838   | 900   | 344   | 771   | 360   | 692   | 889   | 674   | 720   | 633   | 496   | 603   | 1079  | 620   | 598   | 630   | 555   | 288   | 331   | Coro2a   |       |
| Coro2b   | 1692  | 2242  | 2350  | 2936  | 3723  | 3170  | 3113  | 3751  | 4911  | 5780  | 5099  | 6317  | 4852  | 6207  | 2011  | 1970  | 3179  | 3083  | 3627  | 2473  | 3228  | 5833  | 4139  | 6035  | 6571  | 5888  | 4710  | 5269  | Coro2b   |       |
| Coro6    | 111   | 115   | 120   | 109   | 120   | 105   | 102   | 51    | 59    | 57    | 185   | 59    | 65    | 45    | 94    | 132   | 149   | 180   | 108   | 106   | 92    | 112   | 107   | 57    | 74    | 47    | 84    | 46    | Coro6    |       |
| Coro7    | 4783  | 5598  | 5467  | 6351  | 6216  | 6053  | 5589  | 2172  | 2773  | 2819  | 2770  | 2803  | 2759  | 2638  | 4371  | 5076  | 5985  | 6390  | 6416  | 4980  | 6042  | 2968  | 2490  | 2688  | 3165  | 2621  | 2603  | 2403  | Coro7    |       |
| Cort     | 20    | 10    | 24    | 8     | 26    | 22    | 18    | 21    | 14    | 37    | 17    | 27    | 32    | 28    | 12    | 12    | 5     | 14    | 31    | 10    | 10    | 27    | 33    | 25    | 25    | 23    | 37    | 31    | Cort     |       |
| Cot1     | 9029  | 13357 | 13557 | 13064 | 11293 | 10397 | 11222 | 5775  | 7270  | 8389  | 7196  | 7304  | 7583  | 7793  | 9559  | 11725 | 13490 | 13016 | 12601 | 10135 | 11605 | 6797  | 7851  | 8809  | 8090  | 9412  | 6886  | 7602  | Cot1     |       |
| Cox10    | 828   | 969   | 870   | 674   | 650   | 679   | 587   | 1037  | 1202  | 1114  | 1041  | 1351  | 1330  | 1232  | 778   | 804   | 957   | 649   | 787   | 600   | 626   | 1068  | 1232  | 1136  | 1169  | 1423  | 1253  | 1337  | Cox10    |       |
| Cox11    | 1299  | 1021  | 1102  | 1299  | 1108  | 1063  | 1258  | 1152  | 1072  | 1114  | 995   | 1139  | 1050  | 1048  | 1124  | 1008  | 1137  | 1208  | 1120  | 1170  | 1141  | 1086  | 1045  | 1106  | 1084  | 1212  | 1196  | 1149  | Cox11    |       |
| Cox14    | 1821  | 2311  | 2155  | 2391  | 1960  | 2053  | 2292  | 1892  | 1946  | 2006  | 1959  | 1918  | 1928  | 2048  | 1998  | 1749  | 2502  | 2204  | 2207  | 2405  | 2084  | 1574  | 1970  | 2064  | 1910  | 2464  | 2038  | 2130  | Cox14    |       |
| Cox15    | 1505  | 1582  | 1762  | 1480  | 1519  | 1440  | 1530  | 2175  | 2264  | 2328  | 2115  | 2627  | 2427  | 2495  | 1486  | 1423  | 1486  | 1412  | 1696  | 1570  | 1426  | 2186  | 2192  | 2404  | 2060  | 2708  | 2703  | 2711  | Cox15    |       |
| Cox16    | 78    | 68    | 73    | 92    | 87    | 146   | 94    | 104   | 110   | 151   | 121   | 135   | 128   | 106   | 66    | 90    | 122   | 99    | 107   | 130   | 92    | 74    | 108   | 129   | 106   | 159   | 106   | 110   | Cox16    |       |
| Cox17    | 657   | 607   | 583   | 650   | 488   | 597   | 658   | 666   | 687   | 693   | 664   | 679   | 596   | 696   | 634   | 619   | 655   | 657   | 564   | 554   | 630   | 652   | 638   | 695   | 654   | 642   | 696   | 724   | Cox17    |       |
| Cox18    | 543   | 612   | 614   | 609   | 605   | 584   | 596   | 568   | 681   | 628   | 656   | 693   | 666   | 628   | 570   | 641   | 503   | 629   | 539   | 559   | 576   | 615   | 673   | 612   | 612   | 713   | 682   | 624   | Cox18    |       |
| Cox19    | 2656  | 3422  | 3212  | 3740  | 3790  | 3598  | 3709  | 3672  | 3867  | 4318  | 3416  | 4529  | 4155  | 4872  | 3150  | 3020  | 3564  | 3425  | 3926  | 4072  | 3925  | 4067  | 3653  | 4428  | 4693  | 4266  | 4649  | 4535  | Cox19    |       |
| Cox20    | 75    | 29    | 65    | 36    | 21    | 39    | 32    | 95    | 111   | 244   | 59    | 464   | 27    | 59    | 276   | 143   | 64    | 29    | 40    | 361   | 33    | 90    | 104   | 83    | 64    | 209   | 209   | 856   | Cox20    |       |
| Cox41    | 15009 | 17729 | 19085 | 19082 | 16055 | 15173 | 16924 | 13802 | 13988 | 16211 | 15397 | 15998 | 15993 | 17965 | 14973 | 14195 | 19413 | 17475 | 17919 | 15912 | 18408 | 12689 | 15310 | 17293 | 16420 | 18474 | 17445 | 18856 | Cox41    |       |
| Cox42    | 114   | 124   | 63    | 107   | 88    | 70    | 58    | 90    | 103   | 106   | 107   | 78    | 65    | 67    | 113   | 111   | 98    | 90    | 84    | 79    | 76    | 87    | 126   | 81    | 55    | 93    | 64    | 74    | Cox42    |       |
| Cox5a    | 6869  | 6918  | 6848  | 7606  | 6542  | 5495  | 8337  | 5170  | 4420  | 5458  | 4813  | 5173  | 4580  | 6628  | 6712  | 4968  | 7634  | 6664  | 7007  | 6219  | 8268  | 5075  | 4245  | 5833  | 5443  | 5808  | 4979  | 6732  | Cox5a    |       |
| Cox5b    | 3449  | 3950  | 4149  | 3545  | 3184  | 2859  | 3952  | 3430  | 3219  | 3650  | 3466  | 3383  | 3476  | 4907  | 3608  | 2812  | 4069  | 3219  | 3154  | 3595  | 3940  | 3001  | 3317  | 3979  | 3602  | 3920  | 3669  | 4624  | Cox5b    |       |
| Cox5b-ps | 310   | 289   | 281   | 259   | 230   | 152   | 273   | 318   | 253   | 262   | 244   | 216   | 236   | 301   | 324   | 188   | 258   | 228   | 199   | 206   | 269   | 190   | 226   | 276   | 231   | 239   | 255   | 377   | Cox5b-ps |       |
| Cox6a1   | 5867  | 7769  | 6310  | 6468  | 5533  | 4891  | 6240  | 4375  | 4062  | 4393  | 4390  | 4712  | 4390  | 5518  | 5209  | 4867  | 6852  | 5897  | 5936  | 5930  | 6275  | 4209  | 4166  | 5276  | 4682  | 5080  | 4991  | 5421  | Cox6a1   |       |
| Cox6a2   | 2     | 1     | 0     | 0     | 1     | 1     | 2     | 5     | 18    | 0     | 183   | 3     | 3     | 0     | 1     | 0     | 0     | 0     | 0     | 0     | 1     | 10    | 105   | 3     | 4     | 0     | 1     | 0     | Cox6a2   |       |
| Cox6b1   | 8731  | 10018 | 9205  | 9849  | 9430  | 9374  | 10690 | 8672  | 8363  | 8732  | 8859  | 8918  | 9517  | 9524  | 8941  | 8000  | 9711  | 9130  | 10248 | 12308 | 10158 | 7212  | 8644  | 9195  | 9529  | 9925  | 9785  | 9862  | Cox6b1   |       |
| Cox6b2   | 1374  | 1820  | 2759  | 2191  | 1328  | 1224  | 1324  | 419   | 447   | 616   | 620   | 581   | 645   | 777   | 1120  | 1210  | 2490  | 1670  | 1527  | 1182  | 1508  | 359   | 541   | 768   | 455   | 845   | 632   | 882   | Cox6b2   |       |
| Cox6c    | 7689  | 7594  | 8450  | 8806  | 8372  | 7371  | 9975  | 7489  | 7427  | 8245  | 8269  | 7707  | 8191  | 9260  | 7760  | 6612  | 8510  | 7839  | 8447  | 10104 | 9316  | 5909  | 7398  | 8688  | 8506  | 8926  | 8549  | 9952  | Cox6c    |       |
| Cox7a1   | 23    | 40    | 41    | 43    | 38    | 29    | 42    | 46    | 30    | 40    | 33    | 42    | 52    | 43    | 40    | 33    | 54    | 36    | 58    | 42    | 45    | 52    | 42    | 60    | 53    | 38    | 33    | 57    | Cox7a1   |       |
| Cox7a2   | 5906  | 6005  | 5897  | 5976  | 5821  | 5467  | 8075  | 6521  | 6136  | 5433  | 5867  | 5723  | 6100  | 6685  | 6231  | 5325  | 5769  | 5880  | 6676  | 7632  | 7184  | 5519  | 6209  | 6287  | 6527  | 6659  | 6826  | 7645  | Cox7a2   |       |
| Cox7a2b  | 9329  | 10605 | 9430  | 9994  | 8937  | 8880  | 9839  | 8267  | 8062  | 7785  | 7939  | 7767  | 7887  | 8182  | 9802  | 10270 | 9741  | 9257  | 9751  | 11032 | 9493  | 7138  | 8559  | 7912  | 8199  | 8687  | 8262  | 8452  | Cox7a2b  |       |
| Cox7b    | 5667  | 5137  | 5887  | 6122  | 5701  | 5411  | 6994  | 5958  | 4957  | 5422  | 6387  | 5168  | 6056  | 6837  | 6134  | 4780  | 5808  | 5592  | 5502  | 7335  | 6209  | 4916  | 5284  | 6289  | 6912  | 6135  | 6387  | 6003  | 6817     | Cox7b |
| Cox7b2   | 0     | 0     | 0     | 0     | 4     | 5     | 8     | 0     | 0     | 5     | 2     | 0     | 3     | 0     | 0     | 0     | 2     | 1     | 0     | 1     | 5     | 3     | 4     | 0     | 0     | 0     | 1     | 0     | Cox7b2   |       |
| Cox7c    | 4783  | 5073  | 6675  | 7364  | 6716  | 5178  | 8324  | 6809  | 6518  | 8561  | 8506  | 7698  | 7720  | 11574 | 5139  | 4018  | 6960  | 6060  | 6243  | 7394  | 8218  | 5243  | 6581  | 9893  | 8455  | 8772  | 8463  | 11284 | Cox7c    |       |
| Cox8a    | 5464  | 6862  | 5762  | 5621  | 5066  | 4230  | 5851  | 4813  | 5101  | 4956  | 5500  | 4941  | 5294  | 6452  | 5343  | 4551  | 6127  | 5110  | 5191  | 5798  | 5786  | 4450  | 5036  | 5538  | 5483  | 5844  | 5533  | 6467  | Cox8a    |       |
| Cox8b    | 0     | 0     | 0     | 0     | 0     | 0     | 0     | 2     | 1     | 0     | 16    | 0     | 0     | 0     | 0     | 0     | 0     | 0     | 0     | 0     | 5     | 9     | 1     | 0     | 0     | 0     | 0     | 0     | Cox8b    |       |
| Cox8c    | 0     | 0     | 0     | 0     | 0     | 0     | 0     | 0     | 0     | 0     | 0     | 0     | 0     | 1     | 0     | 0     | 0     | 0     | 1     | 0     | 0     | 0     | 0     | 0     | 0     | 0     | 0     | 0     | Cox8c    |       |
| Cp       | 584   | 537   | 682   | 450   | 746   | 652   | 462   | 797   | 850   | 663   | 755   | 697   | 802   | 552   | 667   | 817   | 461   | 483   | 478   | 865   | 565   | 956   | 1116  | 526   | 716   | 580   | 719   | 739   | Cp       |       |
| Cpa1     | 10    | 9     | 15    | 9     | 27    | 23    | 21    | 12    | 18    | 32    | 17    | 15    | 6     | 4     | 7     | 13    | 10    | 13    | 22    | 14    | 18    | 10    | 17    | 12    | 12    | 18    | 5     | 9     | Cpa1     |       |
| Cpa2     | 72    | 67    | 104   | 69    | 54    | 63    | 38    | 118   | 87    | 76    | 86    | 136   | 126   | 98    | 111   | 88    | 51    | 63    | 72    | 70    | 43    | 85    | 74    | 102   | 80    | 149   | 130   | 102   | Cpa2     |       |
| Cpa3     | 52    | 17    | 37    | 24    | 14    | 48    | 6     | 87    | 199   | 116   | 204   | 40    | 68    | 22    | 53    | 40    | 17    | 78    | 37    | 18    | 1     | 69    | 293   | 116   | 68    | 41    | 14    | 27    | Cpa3     |       |
| Cpa4     | 110   | 104   | 82    | 70    | 65    | 106   | 99    | 276   | 260   | 181   | 236   | 401   | 146   | 304   | 124   | 53    | 102   | 87    | 92    | 107   | 64    | 229   | 198   | 295   | 251   | 456   | 311   | 306   | Cpa4     |       |
| Cpa5     | 12    | 16    | 2     | 10    | 2     | 5     | 3     | 7     | 9     | 14    | 21    | 0     | 2     | 9     | 12    | 14    | 19    | 15    | 4     | 7     | 7     | 10    | 24    | 2     | 2     | 9     | 9     | 12    | Cpa5     |       |
| Cpa6     | 15    | 12    | 6     | 11    | 7     | 21    | 2     | 20    | 41    | 25    | 28    | 9     | 18    | 17    | 9     | 7     | 6     | 17    | 2     | 5     | 0     | 40    | 49    | 38    | 18    | 11    | 14    | 17    | Cpa6     |       |
| Cpb1     | 7     | 3     | 0     | 2     | 7     | 0     | 0     | 5     | 4     | 0     | 3     | 2     | 1     | 2     | 3     | 3     | 0     | 2     | 0     | 0     | 0     | 2     | 12    | 1     | 4     | 0     | 1     | 0     | Cpb1     |       |
| Cpb2     | 1     | 0     | 0     | 0     | 2     | 4     | 1     | 1     | 1     | 0     | 3     | 2     | 0     | 0     | 1     | 0     | 0     | 0     | 0     | 2     | 0     | 2     | 1     | 0     | 0     | 0     | 1     | 0     | Cpb2     |       |
| Cpd      | 17426 | 14933 | 10895 | 11848 | 10444 | 12161 | 11577 | 8529  | 8429  | 7063  | 8448  | 7973  | 9044  | 8143  | 16200 | 17002 | 10849 | 12218 | 10048 | 11874 | 11865 | 7478  |       |       |       |       |       |       |          |       |

|         |       |       |       |       |       |       |       |       |       |       |       |       |       |       |       |       |       |       |       |       |       |       |       |       |       |       |       |         |         |
|---------|-------|-------|-------|-------|-------|-------|-------|-------|-------|-------|-------|-------|-------|-------|-------|-------|-------|-------|-------|-------|-------|-------|-------|-------|-------|-------|-------|---------|---------|
| Cpsf2   | 7262  | 6613  | 6563  | 5905  | 6532  | 6833  | 7244  | 9228  | 8074  | 7509  | 7049  | 8690  | 7971  | 9027  | 7224  | 6350  | 6372  | 5888  | 6315  | 7525  | 6781  | 7678  | 7868  | 7546  | 7625  | 8526  | 8750  | 9095    | Cpsf2   |
| Cpsf3   | 6815  | 7056  | 6330  | 5661  | 5152  | 5551  | 5732  | 7338  | 7093  | 6902  | 6465  | 8119  | 7445  | 7903  | 6521  | 6189  | 5660  | 5297  | 5747  | 6230  | 5741  | 6483  | 6810  | 6774  | 6981  | 8134  | 7819  | 7999    | Cpsf3   |
| Cpsf4   | 4151  | 4969  | 4149  | 4623  | 3855  | 3998  | 4117  | 2920  | 3263  | 3145  | 3060  | 3451  | 3386  | 3461  | 4060  | 4326  | 4283  | 4376  | 4190  | 4325  | 3962  | 2928  | 2792  | 3403  | 3366  | 3359  | 3583  | 3370    | Cpsf4   |
| Cpsf4f  | 2     | 5     | 5     | 1     | 7     | 5     | 0     | 0     | 19    | 6     | 9     | 2     | 5     | 4     | 0     | 6     | 2     | 0     | 8     | 2     | 3     | 2     | 12    | 8     | 7     | 0     | 6     | 2       | Cpsf4f  |
| Cpsf6   | 28905 | 20571 | 23357 | 26793 | 27312 | 31660 | 33479 | 38098 | 31150 | 28634 | 30140 | 35131 | 32114 | 37587 | 29048 | 25486 | 24696 | 25708 | 28061 | 31243 | 32549 | 31834 | 28950 | 30275 | 33101 | 29116 | 36157 | 35614   | Cpsf6   |
| Cpsf7   | 7750  | 7478  | 9377  | 8974  | 9814  | 9212  | 10299 | 12737 | 12038 | 13406 | 12669 | 14901 | 13011 | 15525 | 7555  | 6634  | 9143  | 8707  | 10474 | 8486  | 9972  | 13917 | 11138 | 14153 | 14260 | 15384 | 14000 | 15225   | Cpsf7   |
| Cpt1a   | 9612  | 9342  | 8436  | 8195  | 7812  | 8632  | 7851  | 2789  | 3507  | 2869  | 3405  | 2918  | 3072  | 2977  | 8913  | 8385  | 7705  | 8055  | 7838  | 7242  | 7818  | 2734  | 3716  | 2755  | 2787  | 2551  | 2744  | 2753    | Cpt1a   |
| Cpt1b   | 59    | 131   | 97    | 151   | 151   | 119   | 117   | 54    | 66    | 85    | 43    | 48    | 77    | 57    | 95    | 85    | 119   | 113   | 146   | 120   | 105   | 80    | 46    | 57    | 68    | 45    | 85    | 59      | Cpt1b   |
| Cpt1c   | 1817  | 2197  | 2134  | 2735  | 3153  | 2892  | 2501  | 2969  | 3475  | 3962  | 3610  | 3715  | 3495  | 3386  | 1928  | 1903  | 2677  | 2645  | 3125  | 2477  | 2693  | 3995  | 3163  | 4030  | 4077  | 3232  | 3442  | 3528    | Cpt1c   |
| Cpt2    | 1641  | 1980  | 1647  | 1445  | 1199  | 1247  | 1187  | 1089  | 1116  | 945   | 953   | 1083  | 1237  | 1095  | 1692  | 1674  | 1520  | 1391  | 1163  | 1387  | 1170  | 914   | 1265  | 976   | 884   | 1380  | 1217  | 1228    | Cpt2    |
| Cptp    | 1806  | 1982  | 1782  | 1742  | 1591  | 1522  | 1669  | 1093  | 1083  | 1088  | 987   | 1199  | 962   | 1200  | 1717  | 1747  | 1752  | 1582  | 1689  | 1533  | 1576  | 1226  | 1043  | 1081  | 1262  | 1149  | 1227  | 1208    | Cptp    |
| Cpvl    | 6     | 4     | 13    | 2     | 5     | 0     | 4     | 6     | 4     | 6     | 0     | 11    | 9     | 7     | 1     | 10    | 2     | 4     | 3     | 0     | 0     | 3     | 2     | 5     | 2     | 1     | 6     | 4       | Cpvl    |
| Cpxcr1  | 0     | 0     | 0     | 0     | 0     | 0     | 0     | 0     | 1     | 0     | 0     | 0     | 0     | 2     | 0     | 0     | 0     | 0     | 0     | 0     | 0     | 0     | 0     | 0     | 0     | 0     | 0     | 0       | Cpxcr1  |
| Cpxm1   | 2002  | 2098  | 1866  | 1440  | 1218  | 1616  | 681   | 2253  | 3126  | 2484  | 3257  | 2097  | 2871  | 1870  | 1899  | 2571  | 1560  | 1948  | 833   | 735   | 725   | 2737  | 3194  | 2524  | 2229  | 2472  | 2679  | 2039    | Cpxm1   |
| Cpxm2   | 472   | 381   | 247   | 271   | 80    | 311   | 44    | 593   | 738   | 745   | 460   | 382   | 587   | 353   | 405   | 625   | 152   | 342   | 56    | 58    | 58    | 369   | 677   | 668   | 345   | 513   | 381   | 406     | Cpxm2   |
| Cpz     | 226   | 364   | 355   | 139   | 56    | 212   | 28    | 128   | 210   | 188   | 237   | 264   | 305   | 222   | 229   | 341   | 224   | 217   | 58    | 45    | 29    | 180   | 267   | 236   | 202   | 219   | 308   | 310     | Cpz     |
| Cr1l    | 1185  | 955   | 1210  | 885   | 1136  | 1303  | 1055  | 2880  | 2747  | 2502  | 2838  | 2525  | 2883  | 2692  | 1196  | 1064  | 943   | 977   | 1154  | 1147  | 1079  | 2475  | 2904  | 2567  | 2524  | 2763  | 2681  | 2843    | Cr1l    |
| Cr2     | 9     | 3     | 16    | 5     | 17    | 10    | 9     | 31    | 33    | 22    | 23    | 40    | 32    | 29    | 22    | 12    | 0     | 8     | 10    | 31    | 10    | 17    | 25    | 20    | 29    | 21    | 37    | 36      | Cr2     |
| Crabp1  | 5727  | 6133  | 6429  | 2475  | 1823  | 2247  | 780   | 3234  | 4183  | 3481  | 4040  | 2918  | 5243  | 3397  | 5020  | 6796  | 4033  | 2468  | 1207  | 1637  | 1039  | 2117  | 4783  | 3054  | 1878  | 3034  | 3936  | 4815    | Crabp1  |
| Crabp2  | 9816  | 10090 | 11417 | 6219  | 3867  | 4939  | 4055  | 4559  | 3807  | 3447  | 3863  | 4425  | 5684  | 4813  | 10112 | 10222 | 9663  | 4935  | 4878  | 6127  | 4110  | 2971  | 4718  | 4220  | 2527  | 6644  | 5606  | 5844    | Crabp2  |
| Cracd   | 3421  | 3870  | 4622  | 5981  | 7567  | 6365  | 6360  | 11431 | 12102 | 16759 | 13422 | 16140 | 14197 | 16431 | 4011  | 3731  | 6118  | 5862  | 7212  | 5435  | 6762  | 16967 | 10412 | 16307 | 17980 | 10809 | 14189 | 14739   | Cracd   |
| Cracd1  | 213   | 247   | 285   | 248   | 311   | 274   | 149   | 134   | 282   | 239   | 236   | 124   | 142   | 92    | 193   | 287   | 226   | 307   | 282   | 206   | 208   | 221   | 267   | 183   | 188   | 182   | 95    | 113     | Cracd1  |
| Cracr2a | 114   | 111   | 113   | 90    | 117   | 110   | 65    | 132   | 154   | 162   | 152   | 146   | 171   | 127   | 117   | 129   | 103   | 116   | 77    | 128   | 82    | 125   | 135   | 159   | 105   | 122   | 135   | 155     | Cracr2a |
| Cracr2b | 107   | 140   | 179   | 126   | 92    | 122   | 89    | 103   | 163   | 136   | 183   | 129   | 146   | 101   | 99    | 172   | 165   | 125   | 117   | 90    | 104   | 100   | 159   | 141   | 139   | 193   | 134   | 93      | Cracr2b |
| Cradd   | 211   | 209   | 221   | 169   | 177   | 184   | 181   | 454   | 419   | 443   | 435   | 438   | 504   | 567   | 171   | 156   | 184   | 156   | 235   | 226   | 186   | 431   | 419   | 522   | 471   | 646   | 518   | 510     | Cradd   |
| Cramp1  | 7083  | 7311  | 6740  | 8623  | 8057  | 8777  | 8094  | 6348  | 6292  | 7093  | 6981  | 7951  | 7528  | 7885  | 6355  | 7013  | 7736  | 8597  | 8034  | 6429  | 8052  | 7802  | 5675  | 7349  | 7695  | 5722  | 7487  | 7771    | Cramp1  |
| Crat    | 2253  | 2661  | 2385  | 2282  | 2484  | 2107  | 2076  | 1883  | 2177  | 2026  | 2046  | 2006  | 2051  | 1825  | 2218  | 2685  | 2433  | 2335  | 2383  | 1905  | 2045  | 2085  | 2093  | 2092  | 2104  | 2034  | 1912  | 1925    | Crat    |
| Crb1    | 1613  | 1721  | 1371  | 1898  | 1892  | 2028  | 2188  | 1865  | 1324  | 1536  | 1011  | 1804  | 1232  | 1693  | 1975  | 1219  | 1849  | 1909  | 2146  | 2226  | 2244  | 1908  | 1269  | 1325  | 1562  | 1242  | 1844  | 1635    | Crb1    |
| Crb2    | 3245  | 4384  | 5580  | 4019  | 3397  | 3545  | 3472  | 2414  | 2723  | 2625  | 1975  | 5058  | 3978  | 3408  | 3123  | 5115  | 3498  | 4464  | 3588  | 3413  | 2821  | 2447  | 3602  | 3260  | 4878  | 4794  | 4881  | Crb2    |         |
| Crb3    | 143   | 81    | 42    | 111   | 42    | 41    | 32    | 71    | 96    | 109   | 57    | 26    | 51    | 33    | 82    | 92    | 36    | 70    | 37    | 31    | 28    | 47    | 109   | 83    | 24    | 84    | 22    | 30      | Crb3    |
| Crbn    | 3983  | 3601  | 2777  | 3171  | 3244  | 3405  | 3474  | 4855  | 4156  | 3347  | 3332  | 3341  | 3528  | 4354  | 3796  | 3063  | 3126  | 3137  | 4149  | 3680  | 3720  | 4374  | 3148  | 3543  | 3082  | 3691  | 3553  | Crbn    |         |
| Crpc    | 1765  | 1910  | 2283  | 1742  | 1844  | 1760  | 2029  | 2974  | 2512  | 2566  | 2301  | 2685  | 2656  | 3112  | 1970  | 1649  | 1912  | 1698  | 1952  | 2207  | 1979  | 2764  | 2471  | 2686  | 2785  | 2872  | 2862  | 2963    | Crpc    |
| Crct1   | 5     | 2     | 6     | 1     | 6     | 4     | 3     | 7     | 11    | 3     | 5     | 1     | 1     | 3     | 1     | 1     | 0     | 0     | 2     | 4     | 3     | 7     | 7     | 5     | 1     | 0     | 2     | 2       | Crct1   |
| Creb1   | 12312 | 9428  | 10103 | 12121 | 13377 | 13911 | 14679 | 15778 | 13180 | 12435 | 12231 | 14101 | 12893 | 14661 | 13097 | 10999 | 10710 | 12068 | 12807 | 15201 | 13926 | 13334 | 12510 | 13081 | 14016 | 11924 | 14534 | 14320   | Creb1   |
| Creb3   | 2941  | 3178  | 2606  | 3405  | 2761  | 2898  | 2694  | 2405  | 2094  | 2138  | 2028  | 1896  | 2011  | 1853  | 3029  | 3045  | 2844  | 3043  | 2894  | 3270  | 2865  | 2184  | 2047  | 2225  | 2034  | 2092  | 1901  | Creb3   |         |
| Creb3l1 | 783   | 977   | 886   | 766   | 745   | 807   | 422   | 466   | 784   | 763   | 1124  | 555   | 625   | 459   | 775   | 1122  | 914   | 965   | 613   | 430   | 483   | 747   | 1131  | 772   | 669   | 518   | 582   | 469     | Creb3l1 |
| Creb3l2 | 6819  | 6199  | 6192  | 5324  | 4075  | 4717  | 3831  | 3707  | 5662  | 5241  | 8571  | 3049  | 4610  | 2929  | 5813  | 7959  | 5795  | 6294  | 4032  | 2888  | 3733  | 5616  | 5977  | 4499  | 3374  | 3797  | 2995  | 2982    | Creb3l2 |
| Creb3l3 | 10    | 13    | 8     | 6     | 1     | 0     | 1     | 20    | 18    | 5     | 21    | 18    | 28    | 10    | 8     | 12    | 9     | 1     | 2     | 10    | 8     | 17    | 16    | 14    | 8     | 9     | 9     | Creb3l3 |         |
| Creb3l4 | 245   | 251   | 272   | 219   | 173   | 206   | 196   | 182   | 239   | 233   | 258   | 213   | 227   | 187   | 256   | 204   | 267   | 185   | 208   | 219   | 208   | 174   | 260   | 289   | 160   | 298   | 244   | 273     | Creb3l4 |
| Creb5   | 1562  | 1167  | 1354  | 1880  | 1723  | 1521  | 2367  | 1345  | 1732  | 1678  | 2414  | 2232  | 1631  | 2388  | 1402  | 1304  | 1494  | 1852  | 1962  | 1556  | 1934  | 1268  | 1617  | 1832  | 1981  | 2019  | 1741  | 1965    | Creb5   |
| Crebbp  | 2643  | 2750  | 3828  | 4313  | 4556  | 3917  | 3652  | 5470  | 6267  | 8040  | 7299  | 8016  | 6998  | 7438  | 2658  | 2829  | 4424  | 4298  | 4669  | 3024  | 3829  | 8348  | 5513  | 8328  | 8684  | 7781  | 6800  | 7505    | Crebbp  |
| Crebl2  | 767   | 772   | 797   | 976   | 1079  | 936   | 876   | 598   | 527   | 751   | 699   | 509   | 525   | 533   | 711   | 798   | 882   | 1114  | 887   | 881   | 964   | 692   | 571   | 596   | 707   | 444   | 509   | 501     | Crebl2  |
| Crebrf  | 2726  | 2094  | 1458  | 2556  | 2468  | 2785  | 2904  | 3337  | 2624  | 2603  | 2427  | 2274  | 2471  | 2317  | 2846  | 2437  | 2028  | 2776  | 2392  | 2946  | 3091  | 3075  | 2673  | 2382  | 2826  | 1373  | 2136  | 2267    | Crebrf  |
| Crebzf  | 7653  | 6157  | 7034  | 8253  | 7298  | 7448  | 8214  | 8385  | 7217  | 6683  | 7326  | 7777  | 7244  | 7601  | 7404  | 6685  | 6955  | 7617  | 7512  | 7302  | 8027  | 7620  | 7207  | 7609  | 7424  | 7788  | 7503  | 7887    | Crebzf  |
| Creb1   | 2435  | 2549  | 1887  | 1956  | 1559  | 1805  | 1798  | 813   | 940   | 681   | 851   | 779   | 1227  | 816   | 2327  | 2708  | 1871  | 2134  | 1629  | 1979  | 1751  | 703   | 1117  | 776   | 695   | 988   | 809   | 1099    | Creb1   |
| Creb2   | 602   | 629   | 809   | 895   | 1269  | 1111  | 860   | 462   | 381   | 509   | 479   | 339   | 443   | 267   | 847   | 830   | 801   | 873   | 1001  | 975   | 897   | 662   | 419   | 300   | 426   | 101   | 266   | 325     | Creb2   |
| Cred1d  | 1119  | 1465  | 1920  | 1768  | 2014  | 1667  | 1724  | 1774  | 2115  | 2438  | 2420  | 2332  | 2299  | 2202  | 1221  | 1368  | 1972  | 1816  | 2055  | 1669  | 1709  | 2283  | 2060  | 2621  | 2599  | 2417  | 2181  | 2277    | Cred1d  |
| Cred2   | 2874  | 3584  | 3364  | 3161  | 2222  | 2298  | 2358  | 1799  | 1860  | 1878  | 2135  | 1916  | 1754  | 1800  | 2620  | 3086  | 3315  | 3127  | 2724  | 2486  | 2420  | 1775  | 1867  | 2216  | 1834  | 2262  | 1998  | 1953    | Cred2   |
| Crem    | 538   | 480   | 616   | 551   | 578   | 549   | 613   |       |       |       |       |       |       |       |       |       |       |       |       |       |       |       |       |       |       |       |       |         |         |

|            |       |       |       |       |       |       |       |       |       |       |       |       |       |       |       |       |       |       |       |       |       |       |       |       |       |       |       |       |            |
|------------|-------|-------|-------|-------|-------|-------|-------|-------|-------|-------|-------|-------|-------|-------|-------|-------|-------|-------|-------|-------|-------|-------|-------|-------|-------|-------|-------|-------|------------|
| Crtam      | 18    | 16    | 42    | 41    | 19    | 24    | 23    | 12    | 14    | 22    | 16    | 12    | 31    | 6     | 42    | 32    | 24    | 44    | 15    | 27    | 31    | 8     | 11    | 15    | 17    | 12    | 8     | 12    | Crtam      |
| Crtap      | 1256  | 1430  | 1376  | 941   | 638   | 929   | 502   | 1462  | 2035  | 1761  | 2527  | 1374  | 1955  | 1409  | 1255  | 1631  | 907   | 1102  | 542   | 588   | 518   | 1848  | 2620  | 1555  | 1316  | 1663  | 1548  | 1501  | Crtap      |
| Crtc1      | 1752  | 2185  | 2332  | 3255  | 3823  | 3174  | 2568  | 3793  | 4941  | 6194  | 5791  | 5370  | 4820  | 4535  | 1755  | 2029  | 2786  | 3229  | 3406  | 2387  | 2874  | 6697  | 4603  | 5799  | 6375  | 4711  | 4458  | 4194  | Crtc1      |
| Crtc2      | 3133  | 3778  | 3511  | 3833  | 3328  | 3355  | 3343  | 2546  | 2888  | 2840  | 2985  | 3070  | 3024  | 2899  | 2755  | 3453  | 3486  | 3683  | 3647  | 3090  | 3075  | 3096  | 2657  | 3107  | 3036  | 3147  | 2968  | 2885  | Crtc2      |
| Crtc3      | 514   | 628   | 771   | 580   | 873   | 680   | 532   | 1160  | 1681  | 1635  | 1968  | 1402  | 1504  | 1271  | 454   | 720   | 700   | 765   | 628   | 428   | 557   | 1355  | 1670  | 1833  | 1465  | 1631  | 1128  | 1299  | Crtc3      |
| Crx        | 1     | 3     | 1     | 0     | 3     | 12    | 0     | 7     | 9     | 26    | 5     | 23    | 23    | 21    | 4     | 2     | 10    | 3     | 3     | 4     | 5     | 18    | 12    | 32    | 15    | 3     | 34    | 23    | Crx        |
| Crxos      | 6     | 3     | 10    | 3     | 1     | 5     | 0     | 4     | 0     | 0     | 0     | 3     | 7     | 5     | 5     | 2     | 1     | 3     | 0     | 4     | 4     | 0     | 1     | 2     | 4     | 0     | 2     | 6     | Crxos      |
| Cry1       | 5116  | 4922  | 5605  | 5751  | 4494  | 5131  | 5268  | 2037  | 2015  | 1848  | 2002  | 2162  | 1983  | 2103  | 4754  | 4682  | 5401  | 5642  | 5075  | 4418  | 5413  | 2030  | 1919  | 2094  | 2091  | 2326  | 1954  | 2274  | Cry1       |
| Cry2       | 4872  | 6217  | 4823  | 6147  | 4709  | 4781  | 4602  | 2268  | 2454  | 2403  | 2750  | 2773  | 2961  | 2413  | 4899  | 5844  | 4960  | 6276  | 4742  | 4377  | 4845  | 3066  | 2629  | 2549  | 2880  | 2517  | 2459  | 2455  | Cry2       |
| Cryaa      | 0     | 2     | 0     | 0     | 1     | 0     | 0     | 0     | 1     | 0     | 5     | 5     | 1     | 0     | 0     | 0     | 0     | 2     | 5     | 0     | 0     | 10    | 2     | 0     | 2     | 0     | 0     | 0     | Cryaa      |
| Cryab      | 92    | 72    | 51    | 48    | 52    | 53    | 46    | 115   | 222   | 104   | 679   | 106   | 120   | 87    | 73    | 100   | 32    | 61    | 44    | 22    | 42    | 135   | 535   | 136   | 102   | 98    | 95    | 106   | Cryab      |
| Cryba1     | 20    | 26    | 10    | 4     | 17    | 4     | 4     | 31    | 15    | 18    | 30    | 18    | 43    | 11    | 45    | 32    | 24    | 6     | 4     | 23    | 5     | 28    | 20    | 22    | 27    | 15    | 16    | 40    | Cryba1     |
| Cryba2     | 2     | 3     | 17    | 3     | 18    | 15    | 4     | 21    | 17    | 9     | 12    | 13    | 42    | 7     | 5     | 11    | 8     | 3     | 9     | 6     | 3     | 13    | 14    | 10    | 7     | 0     | 8     | 6     | Cryba2     |
| Cryba4     | 18    | 22    | 16    | 6     | 19    | 31    | 17    | 28    | 31    | 33    | 18    | 27    | 20    | 27    | 16    | 30    | 15    | 8     | 27    | 22    | 14    | 20    | 37    | 20    | 27    | 24    | 19    | 28    | Cryba4     |
| Crybb1     | 18    | 12    | 9     | 22    | 30    | 15    | 25    | 29    | 32    | 28    | 58    | 16    | 19    | 14    | 22    | 25    | 13    | 23    | 25    | 25    | 28    | 77    | 44    | 21    | 32    | 36    | 53    | 9     | Crybb1     |
| Crybb2     | 0     | 0     | 0     | 1     | 0     | 0     | 0     | 0     | 0     | 0     | 0     | 0     | 0     | 0     | 0     | 0     | 0     | 0     | 0     | 0     | 0     | 0     | 0     | 0     | 0     | 0     | 0     | 0     | Crybb2     |
| Crybb3     | 210   | 339   | 363   | 476   | 283   | 335   | 283   | 34    | 43    | 74    | 60    | 64    | 46    | 54    | 166   | 314   | 382   | 491   | 376   | 223   | 273   | 77    | 61    | 72    | 90    | 104   | 26    | 51    | Crybb3     |
| Crybg1     | 211   | 121   | 137   | 83    | 61    | 77    | 57    | 167   | 325   | 160   | 192   | 96    | 111   | 80    | 128   | 172   | 82    | 86    | 66    | 82    | 73    | 117   | 304   | 177   | 85    | 93    | 135   | 107   | Crybg1     |
| Crybg2     | 206   | 155   | 187   | 90    | 89    | 153   | 79    | 101   | 147   | 93    | 104   | 63    | 109   | 56    | 162   | 178   | 97    | 141   | 96    | 108   | 80    | 15    | 191   | 114   | 29    | 35    | 73    | 95    | Crybg2     |
| Crybg3     | 2223  | 1791  | 1171  | 1109  | 1226  | 1587  | 1142  | 2710  | 2756  | 1979  | 2751  | 2036  | 2679  | 2037  | 2163  | 2303  | 1118  | 1279  | 948   | 1257  | 1205  | 1566  | 2784  | 1450  | 1624  | 1583  | 2623  | 2042  | Crybg3     |
| Cryga      | 0     | 0     | 0     | 0     | 0     | 0     | 0     | 2     | 0     | 0     | 0     | 0     | 0     | 1     | 0     | 0     | 0     | 0     | 0     | 0     | 0     | 0     | 0     | 0     | 0     | 0     | 0     | 0     | Cryga      |
| Crygb      | 0     | 1     | 0     | 0     | 2     | 0     | 0     | 0     | 1     | 1     | 1     | 1     | 2     | 1     | 1     | 1     | 1     | 1     | 1     | 0     | 0     | 2     | 1     | 1     | 5     | 0     | 2     | 1     | Crygb      |
| Crygc      | 0     | 0     | 0     | 3     | 0     | 4     | 0     | 0     | 0     | 0     | 2     | 0     | 1     | 0     | 1     | 0     | 2     | 0     | 0     | 0     | 0     | 2     | 3     | 1     | 0     | 3     | 2     | 0     | Crygc      |
| Crygd      | 0     | 0     | 1     | 0     | 2     | 2     | 0     | 0     | 0     | 3     | 1     | 1     | 1     | 0     | 1     | 0     | 2     | 0     | 0     | 1     | 1     | 0     | 0     | 3     | 0     | 0     | 9     | 0     | Crygd      |
| Cryge      | 2     | 0     | 2     | 0     | 1     | 0     | 1     | 0     | 0     | 0     | 0     | 3     | 0     | 0     | 0     | 0     | 2     | 0     | 0     | 0     | 2     | 2     | 0     | 0     | 1     | 3     | 0     | 4     | Cryge      |
| Crygf      | 0     | 1     | 0     | 0     | 0     | 0     | 0     | 0     | 0     | 0     | 0     | 0     | 0     | 0     | 0     | 0     | 0     | 0     | 0     | 0     | 0     | 0     | 1     | 0     | 0     | 0     | 0     | 0     | Crygf      |
| Crygn      | 2     | 1     | 1     | 4     | 2     | 3     | 0     | 1     | 2     | 3     | 2     | 0     | 5     | 1     | 3     | 2     | 2     | 4     | 2     | 2     | 4     | 8     | 6     | 7     | 5     | 7     | 1     | 5     | Crygn      |
| Crygs      | 1     | 1     | 0     | 5     | 0     | 0     | 0     | 0     | 0     | 0     | 0     | 0     | 1     | 0     | 3     | 1     | 0     | 3     | 1     | 1     | 2     | 3     | 2     | 4     | 0     | 4     | 3     | 1     | Crygs      |
| Cryl1      | 456   | 381   | 412   | 313   | 261   | 318   | 217   | 464   | 536   | 453   | 489   | 292   | 491   | 328   | 393   | 537   | 335   | 370   | 235   | 278   | 234   | 341   | 676   | 458   | 314   | 498   | 298   | 335   | Cryl1      |
| Crym       | 1338  | 1028  | 896   | 656   | 461   | 512   | 337   | 1208  | 1043  | 1217  | 1321  | 903   | 1458  | 938   | 1030  | 1450  | 670   | 479   | 493   | 361   | 486   | 927   | 1006  | 1128  | 768   | 1478  | 1120  | 897   | Crym       |
| Cryz       | 1294  | 1156  | 1213  | 921   | 904   | 1073  | 941   | 1224  | 1381  | 1145  | 1228  | 1329  | 1401  | 1378  | 1294  | 1281  | 1077  | 867   | 949   | 1243  | 902   | 988   | 1405  | 1326  | 1061  | 1541  | 1357  | 1597  | Cryz       |
| Cryz1      | 4118  | 3507  | 3323  | 3689  | 3906  | 4091  | 4725  | 4137  | 3569  | 3526  | 3366  | 3438  | 3392  | 3870  | 4352  | 3816  | 3716  | 3918  | 3995  | 4357  | 4484  | 3999  | 3620  | 3661  | 3727  | 3469  | 3800  | 3614  | Cryz1      |
| Cryz2      | 378   | 441   | 411   | 374   | 319   | 362   | 315   | 430   | 475   | 433   | 489   | 450   | 524   | 423   | 405   | 397   | 364   | 318   | 331   | 320   | 322   | 394   | 456   | 502   | 421   | 544   | 423   | 394   | Cryz2      |
| Cs         | 29251 | 29864 | 27486 | 25264 | 23734 | 24307 | 26521 | 18429 | 28211 | 17243 | 16677 | 20329 | 18718 | 20182 | 27903 | 26279 | 27186 | 25062 | 26197 | 24020 | 25555 | 18180 | 16823 | 17871 | 17926 | 21695 | 19955 | 20843 | Cs         |
| Csad       | 895   | 885   | 918   | 923   | 906   | 919   | 829   | 1920  | 2290  | 2535  | 2481  | 2310  | 2350  | 2031  | 719   | 924   | 900   | 1000  | 909   | 773   | 866   | 2341  | 2425  | 2562  | 2292  | 2748  | 1984  | 2067  | Csad       |
| Csdc2      | 2483  | 3327  | 2916  | 4761  | 5886  | 4574  | 4522  | 2146  | 2569  | 3134  | 2582  | 2295  | 2055  | 2024  | 2545  | 2989  | 3996  | 5187  | 5896  | 4113  | 4952  | 3816  | 2563  | 2656  | 3225  | 1900  | 1617  | 1735  | Csdc2      |
| Csdc1      | 22255 | 17278 | 23402 | 18888 | 21066 | 21640 | 22669 | 47006 | 38495 | 37993 | 37433 | 43637 | 40566 | 45350 | 23546 | 19756 | 21436 | 19275 | 21575 | 23696 | 21741 | 40818 | 39535 | 40773 | 41570 | 46275 | 47197 | 46873 | Csdc1      |
| Cse11      | 17338 | 14410 | 14257 | 11214 | 10486 | 12086 | 13103 | 19441 | 16614 | 13534 | 12679 | 16727 | 15752 | 16987 | 17368 | 14971 | 15254 | 10588 | 11758 | 14956 | 11950 | 13552 | 15755 | 14515 | 14316 | 18099 | 18053 | 18188 | Cse11      |
| Csf1       | 429   | 456   | 755   | 468   | 691   | 580   | 534   | 657   | 772   | 852   | 1079  | 1002  | 1054  | 872   | 446   | 441   | 578   | 512   | 579   | 550   | 567   | 869   | 1032  | 955   | 914   | 882   | 1022  | 926   | Csf1       |
| Csf1r      | 1271  | 1526  | 1267  | 1098  | 1152  | 1361  | 929   | 1575  | 1851  | 1573  | 2064  | 1698  | 1726  | 1454  | 1328  | 1619  | 1031  | 1332  | 1004  | 1365  | 1066  | 1835  | 2737  | 1602  | 1594  | 1664  | 1722  | 1571  | Csf1r      |
| Csf2       | 0     | 0     | 0     | 0     | 0     | 0     | 0     | 0     | 0     | 0     | 2     | 1     | 0     | 1     | 0     | 0     | 0     | 0     | 0     | 0     | 0     | 0     | 0     | 0     | 0     | 0     | 0     | 0     | Csf2       |
| Csf2ra     | 556   | 764   | 801   | 909   | 1267  | 832   | 843   | 1335  | 1581  | 1882  | 1932  | 1557  | 1569  | 1326  | 592   | 648   | 985   | 1056  | 1146  | 933   | 831   | 2035  | 1521  | 1816  | 1673  | 1415  | 1325  | 1294  | Csf2ra     |
| Csf2rb     | 63    | 107   | 133   | 60    | 69    | 77    | 37    | 76    | 129   | 67    | 182   | 129   | 167   | 147   | 63    | 138   | 82    | 70    | 48    | 47    | 60    | 92    | 162   | 83    | 114   | 144   | 134   | 451   | Csf2rb     |
| Csf2rb2    | 14    | 21    | 58    | 16    | 20    | 15    | 15    | 16    | 41    | 12    | 63    | 37    | 44    | 63    | 16    | 47    | 19    | 33    | 12    | 15    | 22    | 30    | 69    | 39    | 22    | 53    | 38    | 146   | Csf2rb2    |
| Csf3       | 6     | 2     | 1     | 1     | 3     | 2     | 2     | 1     | 4     | 1     | 1     | 2     | 3     | 3     | 1     | 2     | 0     | 4     | 6     | 7     | 1     | 7     | 3     | 5     | 4     | 3     | 1     | 1     | Csf3       |
| Csf3r      | 22    | 43    | 32    | 20    | 43    | 47    | 34    | 53    | 82    | 60    | 83    | 59    | 59    | 45    | 30    | 51    | 34    | 24    | 31    | 36    | 32    | 90    | 124   | 69    | 92    | 31    | 51    | 78    | Csf3r      |
| Csgalnact1 | 75    | 51    | 57    | 57    | 104   | 101   | 57    | 216   | 438   | 379   | 729   | 150   | 204   | 89    | 79    | 79    | 73    | 89    | 70    | 51    | 82    | 408   | 474   | 236   | 309   | 157   | 92    | 104   | Csgalnact1 |
| Csgalnact2 | 1850  | 1274  | 1357  | 1326  | 1392  | 1627  | 1533  | 1448  | 1451  | 1275  | 1597  | 1102  | 1344  | 1295  | 1785  | 1682  | 1401  | 1571  | 1370  | 1585  | 1531  | 1190  | 1539  | 1310  | 1331  | 1214  | 1219  | 1183  | Csgalnact2 |
| Csk        | 4107  | 5156  | 5870  | 5873  | 6052  | 5430  | 4809  | 5046  | 6002  | 6746  | 6403  | 7080  | 6149  | 6242  | 4162  | 4653  | 5858  | 5664  | 6731  | 4368  | 5748  | 6716  | 5900  | 7122  | 7205  | 7841  | 6144  | 6509  | Csk        |
| Csl        | 7     | 7     | 2     | 1     | 5     | 4     | 6     | 4     | 7     | 2     | 1     | 1     | 1     | 3     | 7     | 2     | 2     | 2     | 1     | 4     | 5     | 2     | 2     | 5     | 3     | 1     | 8     | 8     | Csl        |
| Csmd1      | 187   | 247   | 107   | 432   | 1079  | 822   | 810   | 666   | 823   | 739   | 771   | 313   | 295   | 321   | 249   | 232   | 211   | 617   | 549   | 790   | 981   | 785   | 827   | 378   | 825   | 162   | 220   | 228   | Csmd1      |
| Csmd2      | 1232  | 1944  | 1371  | 3095  | 4831  | 3893  | 3641  | 2624  | 2864  | 3664  | 3194  | 2695  | 2908  | 2584  | 1760  | 1781  | 2356  | 3760  | 4023  | 3187  | 4116  | 4659  | 2476  | 2593  | 4063  | 981   | 2414  | 2148  | Csmd2      |
| Csmd3      | 521   | 682   | 212   | 691   | 1148  | 1264  | 1294  | 1771  | 1430  | 918   | 1026  | 509   | 650   | 642   | 825   | 652   | 337   | 935   | 895   | 1663  | 1413  | 1255  | 1232  | 579   | 1076  |       |       |       |            |





|         |       |       |       |       |       |       |       |       |       |       |       |       |       |       |       |       |       |       |       |       |       |       |       |       |       |       |       |       |         |       |
|---------|-------|-------|-------|-------|-------|-------|-------|-------|-------|-------|-------|-------|-------|-------|-------|-------|-------|-------|-------|-------|-------|-------|-------|-------|-------|-------|-------|-------|---------|-------|
| Ctxn1   | 2757  | 3121  | 3039  | 3828  | 4300  | 3811  | 3817  | 4915  | 5119  | 6438  | 5462  | 6247  | 5181  | 6254  | 2724  | 2615  | 3869  | 3599  | 4493  | 3406  | 4077  | 6216  | 4764  | 6557  | 6795  | 6677  | 4781  | 5599  | Ctxn1   |       |
| Ctxn2   | 12    | 8     | 12    | 43    | 52    | 34    | 67    | 54    | 55    | 39    | 35    | 17    | 10    | 23    | 36    | 11    | 28    | 63    | 65    | 58    | 76    | 55    | 53    | 30    | 48    | 4     | 19    | 12    | Ctxn2   |       |
| Ctxn3   | 18    | 15    | 12    | 33    | 28    | 15    | 17    | 55    | 39    | 67    | 71    | 26    | 27    | 20    | 20    | 20    | 22    | 28    | 26    | 29    | 23    | 58    | 67    | 69    | 31    | 57    | 21    | 13    | Ctxn3   |       |
| Cubn    | 194   | 219   | 163   | 106   | 128   | 155   | 88    | 258   | 248   | 201   | 177   | 224   | 242   | 219   | 281   | 171   | 146   | 110   | 141   | 230   | 131   | 207   | 249   | 154   | 148   | 148   | 270   | 215   | Cubn    |       |
| Cuedc1  | 72    | 719   | 83    | 95    | 135   | 125   | 61    | 133   | 140   | 482   | 277   | 341   | 141   | 114   | 78    | 209   | 89    | 86    | 97    | 82    | 63    | 199   | 142   | 226   | 185   | 155   | 218   | 853   | Cuedc1  |       |
| Cuedc2  | 4193  | 5242  | 5012  | 5492  | 5222  | 4857  | 5287  | 4874  | 5504  | 5666  | 5327  | 5577  | 5316  | 6051  | 4390  | 4274  | 5183  | 4996  | 5678  | 5264  | 5537  | 5088  | 5491  | 5709  | 6084  | 6213  | 5693  | 5923  | Cuedc2  |       |
| Cul1    | 9796  | 8338  | 9033  | 7826  | 9115  | 9459  | 10673 | 17027 | 15139 | 13593 | 13551 | 16211 | 14521 | 16893 | 10048 | 8117  | 8771  | 7502  | 9442  | 10383 | 9262  | 14704 | 14490 | 14777 | 14783 | 17438 | 15932 | 16712 | Cul1    |       |
| Cul2    | 6104  | 4942  | 5336  | 4756  | 5065  | 5442  | 5858  | 6863  | 6027  | 5413  | 5294  | 5671  | 5754  | 6064  | 6295  | 5382  | 4926  | 4743  | 4878  | 5540  | 5645  | 6470  | 6261  | 5167  | 5676  | 5758  | 5758  | 6297  | Cul2    |       |
| Cul3    | 12144 | 8671  | 12787 | 12292 | 13576 | 13634 | 15345 | 15226 | 13017 | 14648 | 13727 | 16157 | 14804 | 16355 | 12233 | 10248 | 12369 | 12236 | 13356 | 12104 | 14271 | 16345 | 13185 | 14743 | 15260 | 16044 | 15669 | 16778 | Cul3    |       |
| Cul4a   | 9574  | 9022  | 9235  | 8992  | 9136  | 9194  | 9182  | 8250  | 8175  | 7756  | 8604  | 8732  | 8532  | 8457  | 9126  | 8591  | 9084  | 8605  | 9345  | 8784  | 9206  | 7818  | 8327  | 8001  | 8444  | 8875  | 9028  | 8555  | Cul4a   |       |
| Cul4b   | 6615  | 4632  | 4824  | 4651  | 5079  | 5326  | 5551  | 7963  | 7179  | 6294  | 6978  | 6976  | 7634  | 7364  | 5980  | 5403  | 4578  | 4412  | 4885  | 5566  | 5259  | 6465  | 7353  | 6365  | 6507  | 7046  | 7411  | 7354  | Cul4b   |       |
| Cul5    | 4320  | 3277  | 4221  | 3957  | 5240  | 4663  | 5177  | 7365  | 6470  | 6566  | 6515  | 7444  | 6857  | 7755  | 4361  | 3612  | 4234  | 4084  | 4577  | 4526  | 5108  | 7175  | 6311  | 6683  | 6953  | 6267  | 7342  | 7711  | Cul5    |       |
| Cul7    | 6978  | 7988  | 9119  | 7873  | 7415  | 7308  | 5954  | 9349  | 12803 | 12710 | 14032 | 13762 | 13888 | 12240 | 6220  | 7979  | 8440  | 7679  | 8152  | 5951  | 6375  | 11964 | 12872 | 13674 | 13132 | 13738 | 13179 | 13127 | Cul7    |       |
| Cul9    | 2276  | 3221  | 3095  | 4367  | 4639  | 4104  | 3571  | 2490  | 3197  | 4069  | 3695  | 3154  | 2971  | 2817  | 2409  | 2982  | 3957  | 4329  | 4401  | 3352  | 3832  | 4187  | 3050  | 3434  | 4039  | 1937  | 2782  | 2427  | Cul9    |       |
| Cuta    | 2654  | 3572  | 2872  | 3387  | 2528  | 2439  | 3235  | 1331  | 1453  | 1567  | 1514  | 1697  | 1538  | 1905  | 2778  | 2742  | 3240  | 3009  | 2978  | 2670  | 3230  | 1287  | 1480  | 1580  | 1464  | 1889  | 1796  | 2123  | Cuta    |       |
| Cutal   | 6     | 4     | 9     | 3     | 4     | 7     | 1     | 10    | 13    | 5     | 8     | 13    | 8     | 6     | 15    | 6     | 5     | 3     | 9     | 12    | 3     | 15    | 3     | 16    | 20    | 8     | 13    | 11    | Cutal   |       |
| Cutc    | 200   | 206   | 248   | 222   | 214   | 166   | 188   | 399   | 363   | 366   | 349   | 426   | 473   | 466   | 286   | 213   | 287   | 195   | 184   | 193   | 162   | 289   | 350   | 411   | 298   | 560   | 504   | 438   | Cutc    |       |
| Cux1    | 9839  | 11162 | 12096 | 12369 | 12051 | 11863 | 11980 | 11323 | 12092 | 13707 | 12005 | 16839 | 13217 | 16314 | 9526  | 9285  | 12811 | 11869 | 13087 | 10492 | 12142 | 12933 | 10390 | 14913 | 15669 | 15344 | 15616 | 16067 | Cux1    |       |
| Cux2    | 2258  | 3072  | 4253  | 4636  | 5998  | 4749  | 4292  | 3160  | 3676  | 5310  | 4093  | 4208  | 4701  | 3864  | 2731  | 2646  | 4741  | 4738  | 5375  | 3873  | 4912  | 5528  | 3225  | 4458  | 5360  | 3255  | 3685  | 3604  | Cux2    |       |
| Cuzd1   | 5     | 4     | 2     | 13    | 7     | 11    | 8     | 0     | 7     | 4     | 1     | 1     | 3     | 0     | 7     | 9     | 7     | 6     | 13    | 5     | 14    | 5     | 3     | 1     | 1     | 7     | 6     | 2     | Cuzd1   |       |
| Cwc15   | 5582  | 4964  | 5627  | 5241  | 4413  | 4289  | 5058  | 5840  | 4813  | 5300  | 4922  | 5712  | 5045  | 6606  | 5691  | 4623  | 5276  | 4737  | 4715  | 5007  | 4768  | 5230  | 4911  | 5833  | 5393  | 6263  | 5867  | 6359  | Cwc15   |       |
| Cwc22   | 2491  | 2103  | 2523  | 2067  | 2198  | 2265  | 2321  | 3777  | 3442  | 3221  | 3390  | 3998  | 3782  | 4179  | 2525  | 2020  | 2293  | 1888  | 2249  | 2299  | 2105  | 3220  | 3557  | 3510  | 3474  | 4531  | 4118  | 3966  | Cwc22   |       |
| Cwc25   | 2891  | 2790  | 2983  | 2847  | 2338  | 2499  | 2537  | 2188  | 2116  | 2318  | 2220  | 2383  | 2321  | 2434  | 2528  | 2781  | 2789  | 2659  | 2411  | 2404  | 2611  | 2052  | 2153  | 2456  | 2489  | 2581  | 2352  | 2457  | Cwc25   |       |
| Cwc27   | 1253  | 1140  | 1390  | 1355  | 1034  | 1153  | 1193  | 1838  | 1732  | 1710  | 1585  | 1946  | 1878  | 2262  | 1328  | 1395  | 1189  | 1121  | 1128  | 1449  | 1103  | 1469  | 1714  | 1767  | 1679  | 2517  | 2113  | 2377  | Cwc27   |       |
| Cwf1911 | 2068  | 2098  | 1987  | 1734  | 1889  | 1782  | 2118  | 2369  | 2251  | 2153  | 1967  | 2331  | 2201  | 2449  | 2173  | 1724  | 2179  | 1818  | 1969  | 2105  | 1994  | 2274  | 2045  | 2256  | 2147  | 2110  | 2195  | 2270  | Cwf1911 |       |
| Cwf1912 | 2703  | 1748  | 2475  | 2073  | 2347  | 2339  | 2692  | 3306  | 2871  | 2421  | 2740  | 2994  | 3070  | 3272  | 2843  | 2313  | 2223  | 2027  | 2106  | 2616  | 2319  | 2607  | 2996  | 2935  | 2585  | 2961  | 3244  | 3235  | Cwf1912 |       |
| Cwh43   | 1     | 4     | 2     | 3     | 6     | 0     | 9     | 10    | 7     | 15    | 5     | 1     | 5     | 1     | 1     | 7     | 0     | 0     | 4     | 8     | 4     | 2     | 1     | 8     | 8     | 4     | 8     | 4     | Cwh43   |       |
| Cx3c1   | 690   | 880   | 1014  | 871   | 950   | 878   | 920   | 619   | 809   | 764   | 732   | 727   | 780   | 697   | 760   | 840   | 926   | 817   | 933   | 822   | 855   | 1041  | 812   | 811   | 758   | 702   | 696   | 738   | Cx3c1   |       |
| Cx3c1r1 | 401   | 374   | 534   | 350   | 590   | 483   | 424   | 807   | 887   | 868   | 1134  | 973   | 968   | 848   | 477   | 435   | 385   | 405   | 448   | 396   | 381   | 983   | 1314  | 854   | 798   | 947   | 873   | 892   | Cx3c1r1 |       |
| Cxad    | 25256 | 22051 | 21278 | 25650 | 29139 | 29939 | 32020 | 29687 | 23633 | 22479 | 20077 | 23122 | 22167 | 24236 | 27948 | 23158 | 23854 | 27075 | 28545 | 33951 | 31968 | 26832 | 24390 | 22899 | 27096 | 17770 | 23812 | 23943 | Cxad    |       |
| Cxcl1   | 0     | 0     | 0     | 0     | 0     | 12    | 1     | 4     | 3     | 3     | 3     | 1     | 3     | 2     | 4     | 2     | 2     | 1     | 0     | 3     | 1     | 0     | 6     | 3     | 1     | 11    | 2     | 0     | Cxcl1   |       |
| Cxcl10  | 7     | 5     | 7     | 2     | 6     | 9     | 4     | 6     | 10    | 8     | 9     | 4     | 12    | 7     | 11    | 8     | 6     | 0     | 3     | 7     | 4     | 5     | 12    | 7     | 6     | 5     | 2     | 5     | Cxcl10  |       |
| Cxcl12  | 7005  | 6390  | 7050  | 4822  | 4214  | 4503  | 3822  | 8598  | 11139 | 8634  | 13369 | 8868  | 11219 | 8925  | 6355  | 9048  | 4928  | 5373  | 3641  | 3968  | 3965  | 7479  | 12565 | 9769  | 7142  | 11061 | 8639  | 9277  | Cxcl12  |       |
| Cxcl13  | 3     | 6     | 4     | 4     | 6     | 0     | 0     | 2     | 11    | 0     | 98    | 3     | 8     | 7     | 3     | 10    | 1     | 2     | 0     | 0     | 0     | 8     | 77    | 7     | 0     | 11    | 6     | 1     | Cxcl13  |       |
| Cxcl14  | 1542  | 952   | 781   | 631   | 227   | 1737  | 175   | 3731  | 6185  | 3153  | 3045  | 1945  | 3117  | 2040  | 1274  | 829   | 677   | 1399  | 628   | 295   | 252   | 1058  | 6656  | 3773  | 1525  | 1228  | 1779  | 1705  | Cxcl14  |       |
| Cxcl15  | 0     | 0     | 0     | 0     | 0     | 0     | 0     | 4     | 1     | 11    | 10    | 0     | 0     | 0     | 0     | 0     | 0     | 0     | 0     | 0     | 0     | 0     | 5     | 1     | 0     | 0     | 0     | 0     | Cxcl15  |       |
| Cxcl16  | 105   | 84    | 107   | 70    | 96    | 92    | 54    | 116   | 155   | 139   | 241   | 84    | 120   | 101   | 69    | 102   | 85    | 87    | 79    | 82    | 69    | 142   | 245   | 115   | 99    | 102   | 92    | 75    | Cxcl16  |       |
| Cxcl17  | 0     | 3     | 0     | 0     | 0     | 3     | 2     | 0     | 2     | 0     | 1     | 0     | 1     | 0     | 0     | 1     | 0     | 3     | 2     | 1     | 1     | 0     | 1     | 1     | 0     | 0     | 0     | 0     | Cxcl17  |       |
| Cxcl2   | 2     | 0     | 2     | 2     | 0     | 4     | 2     | 0     | 3     | 3     | 0     | 0     | 1     | 2     | 0     | 0     | 2     | 0     | 0     | 0     | 0     | 0     | 3     | 1     | 0     | 0     | 0     | 0     | Cxcl2   |       |
| Cxcl3   | 0     | 0     | 0     | 0     | 0     | 0     | 0     | 2     | 0     | 6     | 7     | 0     | 0     | 0     | 0     | 0     | 0     | 0     | 0     | 0     | 0     | 2     | 2     | 1     | 0     | 0     | 0     | 0     | Cxcl3   |       |
| Cxcl5   | 7     | 3     | 11    | 0     | 1     | 0     | 1     | 18    | 25    | 25    | 23    | 4     | 7     | 3     | 4     | 2     | 2     | 1     | 7     | 5     | 1     | 5     | 11    | 16    | 5     | 8     | 0     | 0     | Cxcl5   |       |
| Cxcl9   | 0     | 0     | 0     | 0     | 0     | 0     | 0     | 0     | 1     | 0     | 0     | 0     | 3     | 0     | 1     | 0     | 0     | 0     | 0     | 0     | 0     | 0     | 5     | 2     | 0     | 0     | 0     | 0     | Cxcl9   |       |
| Cxcr2   | 8     | 7     | 17    | 11    | 11    | 13    | 7     | 6     | 6     | 10    | 15    | 1     | 12    | 6     | 11    | 9     | 10    | 17    | 6     | 6     | 8     | 17    | 5     | 6     | 7     | 9     | 5     | 4     | Cxcr2   |       |
| Cxcr3   | 1     | 0     | 0     | 7     | 5     | 0     | 1     | 6     | 12    | 3     | 12    | 2     | 8     | 6     | 0     | 2     | 3     | 0     | 1     | 3     | 0     | 2     | 12    | 3     | 1     | 6     | 8     | 7     | Cxcr3   |       |
| Cxcr4   | 1749  | 2312  | 2673  | 1999  | 1658  | 1582  | 1422  | 2533  | 1884  | 1848  | 1684  | 1981  | 2797  | 2164  | 2255  | 2188  | 2299  | 1763  | 1711  | 1749  | 1644  | 2298  | 2143  | 1991  | 1769  | 2042  | 2654  | 2639  | Cxcr4   |       |
| Cxcr5   | 0     | 1     | 2     | 0     | 1     | 0     | 1     | 1     | 2     | 3     | 7     | 2     | 3     | 0     | 3     | 0     | 1     | 3     | 1     | 3     | 1     | 1     | 0     | 3     | 2     | 4     | 2     | 0     | 2       | Cxcr5 |
| Cxcr6   | 0     | 0     | 0     | 0     | 0     | 0     | 0     | 0     | 0     | 0     | 0     | 0     | 0     | 0     | 0     | 0     | 0     | 0     | 0     | 0     | 0     | 0     | 1     | 0     | 0     | 0     | 0     | 0     | Cxcr6   |       |
| Cxoc1   | 4439  | 5807  | 5689  | 6076  | 5225  | 4868  | 5213  | 4586  | 5225  | 5787  | 5000  | 6107  | 5340  | 5720  | 4386  | 4984  | 5909  | 5362  | 5923  | 5018  | 5288  | 4849  | 4806  | 6239  | 5437  | 6839  | 5632  | 5990  | Cxoc1   |       |
| Cxoc4   | 5728  | 4852  | 7232  | 8243  | 8363  | 8010  | 8656  | 9082  | 6464  | 8836  | 7626  | 10218 | 8641  | 10936 | 6336  | 4918  | 7927  | 7591  | 8496  | 7009  | 9002  | 11710 | 6277  | 9464  | 9965  | 8239  | 10909 | 11140 | Cxoc4   |       |
| Cxoc5   | 3519  | 3904  | 4998  | 5061  | 5834  | 4893  | 4955  | 3231  | 3203  | 4007  | 3758  | 4619  | 4058  | 4486  | 3505  | 3828  | 5312  | 5182  | 5940  | 4226  | 5453  | 4380  | 3500  | 4217  | 4421  | 4564  | 3830  | 4543  | Cxoc5   |       |
| Cyb561  | 1648  | 2058  | 1785  | 2098  | 2506  | 2082  | 2039  | 1230  | 1362  | 1395  | 1143  | 1046  | 1027  | 819   | 1912  | 2037  | 1962  | 2073  | 2475  |       |       |       |       |       |       |       |       |       |         |       |

|          |      |      |      |      |      |      |      |      |      |      |      |      |      |      |      |      |      |      |      |        |      |      |      |      |      |      |      |         |          |        |
|----------|------|------|------|------|------|------|------|------|------|------|------|------|------|------|------|------|------|------|------|--------|------|------|------|------|------|------|------|---------|----------|--------|
| Cyp1a1   | 1    | 2    | 14   | 4    | 11   | 6    | 3    | 1    | 8    | 4    | 5    | 3    | 1    | 2    | 7    | 4    | 5    | 18   | 4    | 16     | 21   | 5    | 1    | 1    | 6    | 0    | 0    | 7       | Cyp1a1   |        |
| Cyp1a2   | 0    | 1    | 0    | 5    | 0    | 0    | 0    | 0    | 0    | 2    | 0    | 2    | 0    | 0    | 0    | 0    | 0    | 0    | 0    | 3      | 1    | 0    | 0    | 0    | 0    | 0    | 0    | 0       | 0        | Cyp1a2 |
| Cyp1b1   | 767  | 485  | 589  | 565  | 1002 | 830  | 739  | 1209 | 1126 | 1204 | 1784 | 931  | 1202 | 905  | 835  | 813  | 502  | 721  | 775  | 861    | 878  | 1387 | 1881 | 1078 | 1272 | 1071 | 953  | 815     | Cyp1b1   |        |
| Cyp20a1  | 741  | 636  | 863  | 576  | 691  | 745  | 629  | 1231 | 1300 | 1275 | 1398 | 1440 | 1495 | 1427 | 873  | 793  | 767  | 702  | 684  | 731    | 651  | 1280 | 1458 | 1233 | 1165 | 1712 | 1577 | 1542    | Cyp20a1  |        |
| Cyp21a1  | 2    | 10   | 4    | 6    | 10   | 4    | 8    | 1    | 0    | 1    | 1    | 1    | 1    | 5    | 1    | 6    | 10   | 7    | 8    | 4      | 4    | 3    | 3    | 5    | 5    | 0    | 0    | 2       | Cyp21a1  |        |
| Cyp24a1  | 3    | 9    | 0    | 9    | 7    | 7    | 1    | 17   | 9    | 0    | 9    | 9    | 6    | 2    | 8    | 5    | 1    | 3    | 11   | 5      | 12   | 5    | 6    | 16   | 15   | 6    | 1    | 15      | Cyp24a1  |        |
| Cyp26a1  | 72   | 37   | 16   | 15   | 7    | 13   | 2    | 49   | 124  | 27   | 170  | 23   | 87   | 20   | 70   | 63   | 19   | 11   | 12   | 2      | 2    | 63   | 102  | 34   | 26   | 22   | 6    | 27      | Cyp26a1  |        |
| Cyp26b1  | 1746 | 2744 | 1234 | 3880 | 5471 | 3872 | 371  | 6687 | 7449 | 6937 | 4760 | 1487 | 9719 | 1187 | 3786 | 4208 | 3962 | 3430 | 2377 | 2991   | 1345 | 7650 | 6064 | 2181 | 4032 | 1659 | 1234 | 1270    | Cyp26b1  |        |
| Cyp26c1  | 32   | 41   | 2    | 2    | 0    | 12   | 0    | 20   | 37   | 12   | 35   | 0    | 29   | 2    | 34   | 30   | 7    | 6    | 0    | 0      | 0    | 12   | 30   | 1    | 3    | 1    | 3    | 2       | Cyp26c1  |        |
| Cyp27a1  | 375  | 267  | 351  | 213  | 151  | 180  | 124  | 158  | 190  | 173  | 158  | 137  | 227  | 107  | 287  | 419  | 222  | 188  | 156  | 159    | 102  | 112  | 255  | 176  | 100  | 205  | 189  | 132     | Cyp27a1  |        |
| Cyp27b1  | 61   | 76   | 85   | 87   | 94   | 112  | 135  | 31   | 49   | 32   | 42   | 54   | 35   | 36   | 76   | 82   | 104  | 114  | 111  | 83     | 113  | 28   | 45   | 37   | 37   | 50   | 16   | 28      | Cyp27b1  |        |
| Cyp2a5   | 0    | 1    | 0    | 1    | 7    | 6    | 0    | 13   | 16   | 23   | 17   | 4    | 16   | 4    | 0    | 1    | 0    | 0    | 2    | 1      | 1    | 12   | 14   | 11   | 5    | 4    | 7    | 1       | Cyp2a5   |        |
| Cyp2ab1  | 7    | 10   | 7    | 11   | 6    | 13   | 15   | 2    | 2    | 0    | 1    | 2    | 0    | 0    | 5    | 5    | 7    | 21   | 12   | 8      | 17   | 0    | 6    | 2    | 4    | 0    | 1    | 2       | Cyp2ab1  |        |
| Cyp2b10  | 0    | 1    | 0    | 0    | 0    | 0    | 0    | 0    | 2    | 0    | 0    | 0    | 0    | 0    | 0    | 0    | 0    | 0    | 0    | 0      | 0    | 2    | 0    | 0    | 0    | 0    | 0    | 0       | Cyp2b10  |        |
| Cyp2b23  | 0    | 0    | 0    | 0    | 5    | 0    | 0    | 2    | 2    | 0    | 0    | 0    | 1    | 0    | 0    | 1    | 0    | 0    | 0    | 0      | 0    | 2    | 0    | 1    | 2    | 0    | 0    | 0       | Cyp2b23  |        |
| Cyp2c23  | 1    | 1    | 0    | 4    | 0    | 2    | 1    | 0    | 5    | 0    | 1    | 2    | 3    | 1    | 3    | 2    | 0    | 0    | 3    | 0      | 5    | 3    | 5    | 2    | 1    | 0    | 1    | 1       | Cyp2c23  |        |
| Cyp2c29  | 0    | 0    | 0    | 0    | 0    | 0    | 0    | 0    | 0    | 0    | 1    | 0    | 0    | 0    | 0    | 0    | 0    | 0    | 0    | 0      | 0    | 0    | 0    | 0    | 0    | 0    | 0    | 0       | Cyp2c29  |        |
| Cyp2c40  | 0    | 0    | 0    | 0    | 0    | 0    | 0    | 0    | 0    | 1    | 0    | 0    | 0    | 0    | 0    | 0    | 0    | 0    | 0    | 0      | 0    | 0    | 0    | 0    | 0    | 0    | 0    | 0       | Cyp2c40  |        |
| Cyp2c55  | 21   | 33   | 39   | 46   | 41   | 26   | 40   | 6    | 4    | 13   | 10   | 3    | 8    | 3    | 16   | 28   | 53   | 54   | 33   | 21     | 27   | 10   | 3    | 7    | 10   | 0    | 9    | 5       | Cyp2c55  |        |
| Cyp2c65  | 2    | 7    | 1    | 20   | 7    | 5    | 9    | 1    | 2    | 10   | 4    | 0    | 3    | 0    | 5    | 16   | 6    | 29   | 5    | 15     | 22   | 7    | 1    | 6    | 0    | 2    | 2    | 2       | Cyp2c65  |        |
| Cyp2c68  | 0    | 0    | 0    | 0    | 0    | 0    | 0    | 0    | 0    | 0    | 0    | 0    | 0    | 0    | 0    | 0    | 0    | 0    | 0    | 0      | 0    | 0    | 1    | 0    | 0    | 0    | 0    | 0       | Cyp2c68  |        |
| Cyp2c69  | 0    | 0    | 0    | 0    | 0    | 0    | 0    | 0    | 0    | 0    | 0    | 0    | 0    | 0    | 0    | 0    | 0    | 0    | 0    | 0      | 0    | 0    | 1    | 0    | 0    | 0    | 0    | 0       | Cyp2c69  |        |
| Cyp2c70  | 0    | 0    | 0    | 0    | 0    | 0    | 0    | 0    | 0    | 0    | 0    | 2    | 0    | 0    | 0    | 0    | 0    | 0    | 0    | 0      | 0    | 0    | 1    | 0    | 0    | 1    | 0    | 1       | Cyp2c70  |        |
| Cyp2d10  | 0    | 0    | 0    | 0    | 0    | 0    | 0    | 0    | 0    | 0    | 0    | 0    | 0    | 1    | 0    | 0    | 0    | 0    | 0    | 0      | 0    | 0    | 0    | 0    | 0    | 0    | 0    | 0       | Cyp2d10  |        |
| Cyp2d11  | 0    | 0    | 0    | 0    | 0    | 0    | 0    | 0    | 0    | 0    | 0    | 0    | 0    | 0    | 0    | 0    | 0    | 0    | 0    | 0      | 0    | 0    | 0    | 0    | 0    | 1    | 0    | 0       | Cyp2d11  |        |
| Cyp2d12  | 0    | 0    | 0    | 0    | 0    | 0    | 0    | 0    | 0    | 0    | 0    | 0    | 1    | 0    | 0    | 0    | 0    | 0    | 0    | 0      | 0    | 0    | 0    | 0    | 0    | 0    | 0    | 0       | Cyp2d12  |        |
| Cyp2d22  | 496  | 531  | 628  | 514  | 457  | 531  | 459  | 347  | 441  | 434  | 586  | 371  | 443  | 330  | 458  | 590  | 572  | 545  | 498  | 361    | 461  | 317  | 528  | 377  | 309  | 446  | 289  | 280     | Cyp2d22  |        |
| Cyp2d26  | 24   | 34   | 32   | 34   | 26   | 25   | 30   | 9    | 16   | 25   | 6    | 20   | 28   | 10   | 11   | 20   | 28   | 46   | 39   | 31     | 32   | 15   | 12   | 7    | 17   | 13   | 6    | 6       | Cyp2d26  |        |
| Cyp2d40  | 8    | 11   | 6    | 9    | 11   | 6    | 15   | 0    | 2    | 16   | 1    | 3    | 3    | 8    | 6    | 10   | 26   | 12   | 27   | 21     | 3    | 3    | 4    | 9    | 3    | 0    | 0    | 0       | Cyp2d40  |        |
| Cyp2d9   | 1    | 1    | 1    | 6    | 1    | 0    | 0    | 0    | 0    | 0    | 4    | 0    | 0    | 0    | 5    | 0    | 3    | 3    | 0    | 0      | 0    | 0    | 0    | 0    | 0    | 0    | 0    | 3       | 0        | Cyp2d9 |
| Cyp2e1   | 0    | 0    | 0    | 0    | 0    | 0    | 0    | 0    | 0    | 0    | 0    | 0    | 1    | 0    | 0    | 0    | 0    | 0    | 0    | 0      | 0    | 0    | 1    | 0    | 0    | 0    | 0    | 0       | Cyp2e1   |        |
| Cyp2f2   | 0    | 0    | 0    | 0    | 0    | 0    | 0    | 17   | 44   | 39   | 12   | 0    | 0    | 0    | 0    | 0    | 0    | 0    | 0    | 0      | 0    | 3    | 83   | 18   | 0    | 0    | 0    | 0       | Cyp2f2   |        |
| Cyp2g1   | 0    | 0    | 0    | 4    | 0    | 0    | 0    | 82   | 51   | 82   | 50   | 0    | 7    | 4    | 0    | 0    | 0    | 0    | 0    | 0      | 0    | 0    | 104  | 113  | 0    | 19   | 0    | 0       | Cyp2g1   |        |
| Cyp2j11  | 0    | 0    | 0    | 0    | 0    | 0    | 0    | 0    | 0    | 2    | 0    | 0    | 0    | 0    | 0    | 0    | 0    | 0    | 0    | 0      | 0    | 2    | 0    | 0    | 0    | 0    | 0    | 0       | Cyp2j11  |        |
| Cyp2j12  | 0    | 0    | 0    | 0    | 0    | 0    | 0    | 2    | 1    | 0    | 0    | 0    | 0    | 0    | 0    | 0    | 0    | 0    | 0    | 0      | 0    | 0    | 0    | 0    | 0    | 0    | 0    | 0       | Cyp2j12  |        |
| Cyp2j13  | 2    | 1    | 3    | 4    | 7    | 1    | 1    | 11   | 0    | 9    | 4    | 9    | 9    | 3    | 1    | 3    | 1    | 3    | 2    | 4      | 0    | 1    | 11   | 1    | 5    | 2    | 9    | Cyp2j13 |          |        |
| Cyp2j5   | 0    | 0    | 0    | 0    | 0    | 0    | 0    | 0    | 2    | 0    | 4    | 0    | 0    | 0    | 0    | 0    | 0    | 0    | 0    | 0      | 1    | 0    | 0    | 0    | 0    | 0    | 0    | 0       | Cyp2j5   |        |
| Cyp2j6   | 870  | 631  | 590  | 561  | 770  | 629  | 618  | 877  | 892  | 813  | 842  | 665  | 761  | 591  | 973  | 886  | 530  | 635  | 575  | 661    | 564  | 825  | 873  | 614  | 644  | 687  | 542  | 606     | Cyp2j6   |        |
| Cyp2j7   | 0    | 0    | 0    | 0    | 0    | 0    | 0    | 0    | 0    | 0    | 0    | 0    | 0    | 0    | 0    | 0    | 0    | 0    | 0    | 0      | 0    | 0    | 1    | 0    | 0    | 0    | 0    | 0       | Cyp2j7   |        |
| Cyp2j8   | 8    | 6    | 7    | 0    | 2    | 9    | 7    | 9    | 2    | 2    | 8    | 3    | 6    | 1    | 21   | 7    | 2    | 6    | 19   | 6      | 6    | 7    | 1    | 0    | 0    | 0    | 3    | 0       | Cyp2j8   |        |
| Cyp2j9   | 57   | 72   | 44   | 55   | 117  | 81   | 101  | 161  | 196  | 133  | 161  | 115  | 132  | 137  | 73   | 61   | 56   | 69   | 80   | 90     | 90   | 127  | 154  | 99   | 102  | 152  | 116  | 101     | Cyp2j9   |        |
| Cyp2r1   | 36   | 48   | 18   | 20   | 26   | 37   | 16   | 125  | 103  | 52   | 102  | 73   | 87   | 66   | 59   | 60   | 20   | 17   | 18   | 37     | 29   | 63   | 119  | 59   | 60   | 32   | 72   | 50      | Cyp2r1   |        |
| Cyp2s1   | 205  | 102  | 66   | 48   | 76   | 54   | 30   | 78   | 146  | 106  | 180  | 74   | 75   | 34   | 108  | 206  | 44   | 87   | 52   | 28     | 30   | 119  | 117  | 60   | 56   | 52   | 27   | 42      | Cyp2s1   |        |
| Cyp2t4   | 0    | 0    | 0    | 0    | 4    | 0    | 0    | 0    | 0    | 1    | 0    | 0    | 0    | 0    | 0    | 0    | 0    | 0    | 0    | 0      | 0    | 0    | 3    | 0    | 0    | 0    | 0    | 0       | Cyp2t4   |        |
| Cyp2u1   | 374  | 409  | 604  | 615  | 576  | 548  | 596  | 136  | 141  | 155  | 129  | 127  | 142  | 151  | 401  | 465  | 606  | 626  | 596  | 386    | 582  | 182  | 149  | 173  | 225  | 182  | 80   | 136     | Cyp2u1   |        |
| Cyp2w1   | 43   | 18   | 6    | 0    | 0    | 18   | 0    | 186  | 302  | 128  | 91   | 45   | 64   | 27   | 21   | 14   | 1    | 10   | 4    | 0      | 0    | 12   | 353  | 102  | 4    | 25   | 35   | 28      | Cyp2w1   |        |
| Cyp39a1  | 3513 | 2988 | 3428 | 2829 | 2603 | 2681 | 3204 | 1853 | 1684 | 1516 | 1413 | 2284 | 1978 | 2186 | 3539 | 2921 | 3118 | 2689 | 3031 | 3235   | 2958 | 1425 | 1746 | 1859 | 1536 | 2355 | 2069 | 2388    | Cyp39a1  |        |
| Cyp3a13  | 0    | 0    | 0    | 0    | 0    | 0    | 0    | 1    | 0    | 0    | 1    | 0    | 1    | 0    | 0    | 0    | 0    | 0    | 0    | 0      | 1    | 3    | 4    | 2    | 0    | 0    | 3    | 0       | Cyp3a13  |        |
| Cyp3a57  | 3    | 0    | 0    | 0    | 1    | 2    | 1    | 0    | 3    | 0    | 3    | 0    | 0    | 0    | 1    | 0    | 2    | 2    | 0    | 2      | 0    | 0    | 0    | 0    | 0    | 1    | 0    | 0       | Cyp3a57  |        |
| Cyp46a1  | 2384 | 3081 | 3553 | 3931 | 2834 | 2906 | 3114 | 724  | 659  | 945  | 675  | 1181 | 1073 | 1057 | 2268 | 2808 | 3497 | 3594 | 3244 | 2723   | 3190 | 729  | 694  | 1113 | 1072 | 988  | 1062 | 1157    | Cyp46a1  |        |
| Cyp4a12a | 0    | 0    | 0    | 0    | 0    | 0    | 0    | 5    | 7    | 3    | 0    | 0    | 0    | 0    | 0    | 0    | 0    | 0    | 0    | 0      | 0    | 0    | 2    | 0    | 0    | 0    | 0    | 0       | Cyp4a12a |        |
| Cyp4a12b | 0    | 0    | 0    | 0    | 0    | 0    | 0    | 5    | 2    | 0    | 0    | 0    | 0    | 0    | 0    | 0    | 0    | 0    | 0    | 0      | 0    | 0    | 1    | 0    | 0    | 0    | 0    | 0       | Cyp4a12b |        |
| Cyp4a29  | 0    | 0    | 0    | 0    | 0    | 0    | 0    | 1    | 2    | 0    | 0    | 0    | 0    | 0    | 0    | 0    | 0    | 0    | 0    | 0      | 0    | 0    | 1    | 0    | 0    | 0    | 0    | 0       | Cyp4a29  |        |
| Cyp4a32  | 0    | 0    | 0    | 0    | 0    | 0    | 0    | 0    | 0    | 0    | 1    | 0    | 0    | 0    | 0    | 0    | 0    | 0    | 0    | 0      | 0    | 0    | 0    | 0    | 0    | 0    | 0    | 0       | Cyp4a32  |        |
| Cyp4b1   | 0    | 4    | 0    | 1    | 6    | 2    | 3    | 6    | 7    | 5    | 12   | 3    | 6    | 1    | 1    | 2    | 1    | 7    | 5    | 8      | 1    | 13   | 17   | 0    | 2    | 1    | 1    | 1       | Cyp4b1   |        |
| Cyp4f13  | 331  | 316  | 215  | 408  | 435  | 461  | 343  | 412  | 494  | 449  | 613  | 364  | 411  | 365  | 402  | 442  | 246  | 406  | 358  | 398    | 364  | 481  | 637  | 337  | 419  | 317  | 367  | 342     | Cyp4f13  |        |
| Cyp4f14  | 0    | 1    | 0    | 0    | 0    | 0    | 0    | 1    | 2    | 1    | 0    | 0    | 3    | 1    | 0    | 5    | 0    | 0    | 0    | 0      | 2    | 0    | 2    | 2    | 8    | 0    | 0    | 0       | Cyp4f14  |        |
| Cyp4f15  | 18   | 18   | 10   | 16   | 24   | 15   | 15   | 71   | 87   | 59   | 96   | 89   | 83   | 70   | 16   | 17   | 8    | 15   | 24   | 21     | 21   | 55   | 106  | 56   | 55   | 86   | 92   | 74      | Cyp4f15  |        |
| Cyp4f16  | 787  | 888  | 843  | 896  | 1005 | 953  | 885  | 1423 | 1582 | 1572 | 1463 | 1378 | 1405 | 1309 | 878  | 925  | 787  | 800  | 935  | 1025</ |      |      |      |      |      |      |      |         |          |        |

|               |       |       |       |       |       |       |       |       |       |       |       |       |       |       |       |       |       |       |       |       |       |       |       |       |       |       |       |       |               |
|---------------|-------|-------|-------|-------|-------|-------|-------|-------|-------|-------|-------|-------|-------|-------|-------|-------|-------|-------|-------|-------|-------|-------|-------|-------|-------|-------|-------|-------|---------------|
| Cyth1         | 3037  | 3525  | 3272  | 3802  | 3703  | 3777  | 3761  | 2807  | 2905  | 3364  | 3267  | 3288  | 3201  | 3325  | 2917  | 3157  | 3549  | 4044  | 4006  | 3283  | 3805  | 3260  | 2822  | 3306  | 3695  | 3013  | 3219  | 3109  | Cyth1         |
| Cyth2         | 3262  | 3898  | 4082  | 4618  | 4957  | 4480  | 4816  | 7780  | 7731  | 9303  | 7906  | 9488  | 7896  | 10240 | 3698  | 3262  | 4758  | 4273  | 5524  | 4298  | 5109  | 9157  | 7419  | 9943  | 9808  | 9651  | 8780  | 9693  | Cyth2         |
| Cyth3         | 5805  | 5741  | 4954  | 5386  | 5276  | 5131  | 4761  | 3307  | 3574  | 3323  | 3868  | 3206  | 3669  | 3175  | 5649  | 6381  | 5035  | 5369  | 4954  | 4717  | 4877  | 3601  | 4066  | 3139  | 3398  | 3210  | 3263  | 3163  | Cyth3         |
| Cyth4         | 121   | 165   | 171   | 148   | 162   | 198   | 129   | 357   | 449   | 349   | 487   | 482   | 441   | 396   | 117   | 195   | 162   | 138   | 128   | 149   | 130   | 404   | 640   | 379   | 322   | 413   | 397   | 348   | Cyth4         |
| Cytip         | 9     | 10    | 11    | 4     | 8     | 24    | 7     | 7     | 33    | 41    | 41    | 10    | 6     | 9     | 13    | 16    | 10    | 14    | 7     | 20    | 5     | 22    | 27    | 3     | 7     | 12    | 13    | 21    | Cytip         |
| Cyrl1         | 20    | 28    | 10    | 8     | 6     | 60    | 3     | 96    | 406   | 263   | 640   | 11    | 42    | 13    | 18    | 23    | 10    | 25    | 10    | 3     | 4     | 239   | 287   | 190   | 140   | 24    | 0     | 5     | Cyrl1         |
| Cyrr1         | 306   | 187   | 311   | 248   | 327   | 306   | 284   | 434   | 446   | 607   | 742   | 631   | 704   | 608   | 306   | 312   | 289   | 316   | 251   | 227   | 312   | 672   | 554   | 521   | 632   | 508   | 741   | 622   | Cyrr1         |
| Czib          | 1790  | 1701  | 1865  | 1513  | 1461  | 1628  | 1793  | 3751  | 3882  | 3632  | 3734  | 3738  | 3430  | 3981  | 1814  | 1593  | 1727  | 1495  | 1764  | 1859  | 1648  | 3584  | 3938  | 3859  | 3717  | 3769  | 3671  | 3853  | Czib          |
| D030056L22Rik | 4549  | 4311  | 4458  | 5169  | 4322  | 4521  | 5380  | 3654  | 2970  | 3083  | 2571  | 3860  | 3226  | 3775  | 4937  | 4194  | 4838  | 4640  | 5152  | 5494  | 4958  | 3225  | 2871  | 3697  | 3447  | 4244  | 3327  | 3811  | D030056L22Rik |
| D11Wsu47e     | 2295  | 2829  | 1628  | 2361  | 1868  | 2145  | 2074  | 1759  | 1542  | 1499  | 1558  | 1718  | 1554  | 1571  | 2202  | 2287  | 1936  | 2194  | 1998  | 2172  | 2217  | 1522  | 1439  | 1473  | 1704  | 1248  | 1519  | 1548  | D11Wsu47e     |
| D130040H23Rik | 633   | 532   | 441   | 389   | 480   | 663   | 449   | 1080  | 975   | 603   | 652   | 691   | 739   | 632   | 663   | 535   | 370   | 423   | 529   | 757   | 608   | 530   | 921   | 577   | 812   | 567   | 945   | 650   | D130040H23Rik |
| D130043K22Rik | 411   | 542   | 314   | 508   | 765   | 598   | 520   | 341   | 341   | 348   | 321   | 272   | 316   | 223   | 438   | 485   | 414   | 591   | 605   | 635   | 637   | 378   | 372   | 256   | 371   | 118   | 231   | 193   | D130043K22Rik |
| D13Ert4608e   | 6     | 2     | 6     | 8     | 0     | 0     | 2     | 0     | 0     | 0     | 1     | 0     | 0     | 0     | 5     | 2     | 5     | 0     | 2     | 2     | 0     | 0     | 0     | 1     | 0     | 0     | 0     | 0     | D13Ert4608e   |
| D16Ert472e    | 2979  | 2279  | 2178  | 2576  | 2031  | 2241  | 2514  | 1928  | 1865  | 1617  | 1770  | 1758  | 1915  | 1806  | 2418  | 2569  | 2304  | 2251  | 2023  | 2329  | 2313  | 1542  | 1938  | 1673  | 1637  | 1961  | 1922  | 1824  | D16Ert472e    |
| D17H6553E     | 606   | 669   | 842   | 697   | 642   | 657   | 606   | 547   | 585   | 548   | 683   | 710   | 687   | 645   | 554   | 580   | 730   | 653   | 718   | 619   | 599   | 511   | 611   | 646   | 726   | 790   | 662   | 660   | D17H6553E     |
| D1Pas1        | 43    | 20    | 49    | 32    | 18    | 28    | 15    | 1     | 12    | 20    | 24    | 12    | 35    | 7     | 32    | 43    | 36    | 13    | 2     | 15    | 10    | 3     | 3     | 2     | 12    | 3     | 6     | 14    | D1Pas1        |
| D2hgdh        | 505   | 517   | 457   | 481   | 565   | 571   | 543   | 1166  | 1271  | 1155  | 1291  | 1366  | 1203  | 1079  | 525   | 526   | 548   | 592   | 583   | 550   | 523   | 1280  | 1196  | 1222  | 1210  | 1064  | 1147  | 1169  | D2hgdh        |
| D3Ert4751e    | 2553  | 1808  | 2158  | 1956  | 1573  | 2002  | 2069  | 1595  | 1457  | 1332  | 1341  | 1656  | 1557  | 1792  | 2532  | 2221  | 1938  | 1705  | 1506  | 2330  | 1731  | 1282  | 1427  | 1357  | 1281  | 1545  | 1633  | 1653  | D3Ert4751e    |
| D430019H16Rik | 1348  | 14348 | 12559 | 16554 | 20435 | 18753 | 19270 | 15384 | 15556 | 18226 | 15593 | 16511 | 14635 | 17082 | 13876 | 13399 | 15410 | 17107 | 19610 | 16422 | 20190 | 21420 | 14101 | 17105 | 21457 | 12590 | 15342 | 15517 | D430019H16Rik |
| D430041D05Rik | 1405  | 1425  | 1054  | 2016  | 3728  | 2954  | 3219  | 3500  | 3916  | 4770  | 3668  | 3494  | 2929  | 3365  | 1888  | 1453  | 1598  | 2714  | 2982  | 2638  | 3348  | 3429  | 3405  | 3459  | 5236  | 2083  | 2998  | 2775  | D430041D05Rik |
| D5Ert4579e    | 7442  | 7013  | 5190  | 6507  | 8112  | 8085  | 7983  | 10893 | 9683  | 9127  | 8415  | 9276  | 8921  | 9720  | 7953  | 6392  | 6058  | 6940  | 7289  | 8902  | 8118  | 9481  | 9144  | 8231  | 9984  | 5853  | 10103 | 8930  | D5Ert4579e    |
| D63003M21Rik  | 231   | 317   | 336   | 209   | 228   | 307   | 108   | 535   | 1006  | 748   | 926   | 635   | 934   | 534   | 274   | 369   | 292   | 238   | 217   | 161   | 170   | 827   | 852   | 672   | 587   | 666   | 695   | 612   | D63003M21Rik  |
| D630023F18Rik | 13    | 10    | 34    | 30    | 24    | 24    | 30    | 4     | 23    | 16    | 21    | 17    | 10    | 16    | 17    | 15    | 19    | 39    | 27    | 24    | 23    | 13    | 22    | 25    | 13    | 18    | 9     | 11    | D630023F18Rik |
| D630039A03Rik | 22    | 7     | 23    | 10    | 13    | 11    | 4     | 16    | 25    | 10    | 24    | 11    | 15    | 5     | 17    | 17    | 0     | 11    | 5     | 5     | 5     | 7     | 25    | 23    | 11    | 8     | 2     | 5     | D630039A03Rik |
| D630045J12Rik | 3698  | 3664  | 4002  | 4923  | 6215  | 5560  | 5531  | 7573  | 8093  | 10512 | 8602  | 9799  | 8037  | 9139  | 3568  | 3623  | 4612  | 4830  | 6142  | 4178  | 5712  | 11090 | 7108  | 9448  | 11963 | 6383  | 8218  | 8162  | D630045J12Rik |
| D6Ert4527e    | 57    | 77    | 78    | 91    | 102   | 87    | 78    | 12    | 22    | 14    | 14    | 24    | 22    | 23    | 47    | 102   | 102   | 107   | 57    | 42    | 57    | 17    | 14    | 12    | 8     | 21    | 10    | 15    | D6Ert4527e    |
| D6Wsu163e     | 2023  | 2051  | 1713  | 1835  | 1843  | 1773  | 1951  | 2175  | 2052  | 1916  | 1734  | 1764  | 1690  | 1991  | 2028  | 1793  | 1994  | 1776  | 1762  | 2196  | 2053  | 1903  | 2061  | 1874  | 1951  | 1654  | 1703  | 1879  | D6Wsu163e     |
| D7Ert443e     | 2     | 4     | 4     | 7     | 13    | 14    | 6     | 20    | 47    | 27    | 43    | 8     | 28    | 3     | 13    | 4     | 6     | 15    | 3     | 4     | 3     | 25    | 39    | 8     | 21    | 14    | 10    | 5     | D7Ert443e     |
| D830030K20Rik | 105   | 90    | 82    | 80    | 110   | 121   | 110   | 99    | 105   | 89    | 81    | 83    | 84    | 101   | 113   | 108   | 88    | 70    | 115   | 149   | 103   | 117   | 92    | 68    | 88    | 64    | 84    | 94    | D830030K20Rik |
| D8Ert4738e    | 3621  | 4685  | 4263  | 4142  | 3261  | 3148  | 3708  | 2542  | 2811  | 2832  | 3021  | 2914  | 2935  | 3557  | 3578  | 3547  | 4220  | 3639  | 3514  | 3946  | 3684  | 2117  | 2721  | 3121  | 2934  | 3606  | 3253  | 3364  | D8Ert4738e    |
| D930020B18Rik | 225   | 116   | 87    | 102   | 72    | 85    | 83    | 125   | 69    | 135   | 77    | 8     | 28    | 24    | 133   | 157   | 96    | 78    | 40    | 75    | 53    | 17    | 102   | 119   | 13    | 174   | 2     | 5     | D930020B18Rik |
| D930048N14Rik | 256   | 168   | 209   | 124   | 173   | 149   | 146   | 115   | 168   | 135   | 293   | 125   | 180   | 116   | 160   | 245   | 214   | 228   | 148   | 145   | 142   | 132   | 215   | 105   | 133   | 154   | 131   | 138   | D930048N14Rik |
| Daam1         | 10308 | 10368 | 10099 | 12570 | 13994 | 13277 | 14613 | 9249  | 8941  | 9342  | 8359  | 8260  | 8022  | 8815  | 11570 | 10347 | 11346 | 13195 | 12752 | 13747 | 14447 | 9954  | 8134  | 8692  | 10193 | 6857  | 7861  | 7936  | Daam1         |
| Daam2         | 2179  | 1862  | 1537  | 1613  | 1992  | 1897  | 1101  | 3838  | 4108  | 4764  | 5036  | 2432  | 3813  | 2488  | 2000  | 2394  | 1683  | 2048  | 1400  | 1040  | 1249  | 3815  | 4113  | 3780  | 2996  | 2714  | 2411  | 2372  | Daam2         |
| Dab1          | 4159  | 4044  | 4026  | 5432  | 6998  | 7264  | 8122  | 6577  | 6613  | 7002  | 5690  | 7089  | 6358  | 7313  | 4923  | 3752  | 4997  | 6245  | 7196  | 7514  | 7745  | 7762  | 5818  | 6980  | 8695  | 5358  | 6202  | 6569  | Dab1          |
| Dab2          | 7453  | 6209  | 6838  | 3545  | 2864  | 4539  | 2482  | 6731  | 8869  | 7106  | 10184 | 7326  | 10010 | 7059  | 7425  | 9425  | 4582  | 4629  | 2320  | 3071  | 2468  | 7528  | 11204 | 7118  | 5748  | 7742  | 8486  | 7350  | Dab2          |
| Dab2ip        | 6118  | 7178  | 7805  | 8533  | 9407  | 8143  | 7778  | 6483  | 8174  | 8852  | 8656  | 8755  | 7785  | 7778  | 5399  | 6777  | 8676  | 8873  | 9757  | 6619  | 8174  | 7795  | 7643  | 9037  | 9432  | 7652  | 7281  | 7436  | Dab2ip        |
| Dach1         | 4736  | 3914  | 7819  | 6482  | 6567  | 6666  | 6563  | 6807  | 5685  | 6969  | 6582  | 9747  | 11297 | 10428 | 5304  | 4903  | 6999  | 5755  | 6656  | 5501  | 6148  | 7860  | 5711  | 7915  | 8177  | 9166  | 9630  | 11447 | Dach1         |
| Dach2         | 1039  | 1118  | 1049  | 1009  | 1065  | 1006  | 1047  | 1138  | 845   | 677   | 672   | 706   | 913   | 748   | 1503  | 1213  | 1210  | 946   | 851   | 1092  | 929   | 1078  | 900   | 641   | 756   | 737   | 851   | 818   | Dach2         |
| Dact1         | 4512  | 4044  | 4350  | 5026  | 6131  | 5461  | 4714  | 5939  | 6301  | 6841  | 6883  | 5036  | 5227  | 4696  | 4424  | 4854  | 4536  | 5382  | 5415  | 4359  | 5042  | 7095  | 5962  | 6349  | 6686  | 5574  | 4313  | 4494  | Dact1         |
| Dact2         | 219   | 282   | 269   | 279   | 254   | 267   | 189   | 169   | 276   | 219   | 262   | 154   | 185   | 130   | 187   | 250   | 200   | 246   | 263   | 206   | 187   | 122   | 257   | 192   | 132   | 168   | 128   | 132   | Dact2         |
| Dact3         | 4207  | 5878  | 4371  | 5939  | 4523  | 4573  | 4404  | 1711  | 1860  | 1966  | 2374  | 1777  | 2158  | 1669  | 4214  | 4777  | 5235  | 5899  | 4698  | 4053  | 4632  | 2184  | 2102  | 2004  | 1840  | 2187  | 1825  | 1673  | Dact3         |
| Dad1          | 4862  | 6276  | 4525  | 5125  | 4394  | 4490  | 4837  | 3644  | 3695  | 3278  | 3751  | 3161  | 3741  | 3688  | 4733  | 4898  | 4948  | 5071  | 4623  | 5342  | 4872  | 3227  | 3772  | 3538  | 3625  | 3980  | 3660  | 3603  | Dad1          |
| Dag1          | 14802 | 16707 | 18875 | 17069 | 15248 | 15402 | 13703 | 7850  | 9614  | 10773 | 11086 | 11556 | 11264 | 10249 | 14410 | 17913 | 17117 | 17785 | 15256 | 11745 | 14173 | 10828 | 10616 | 10912 | 10243 | 10525 | 10261 | 11186 | Dag1          |
| Dagla         | 602   | 785   | 969   | 966   | 1424  | 1075  | 963   | 806   | 1126  | 1309  | 1316  | 1098  | 1170  | 895   | 626   | 855   | 969   | 1267  | 1218  | 860   | 1000  | 1549  | 1005  | 1285  | 1411  | 928   | 972   | 869   | Dagla         |
| Daglb         | 1108  | 1367  | 1205  | 1419  | 1233  | 1454  | 1226  | 1001  | 1065  | 1134  | 1134  | 1258  | 1120  | 1004  | 1117  | 1277  | 1238  | 1317  | 1347  | 1221  | 1205  | 1093  | 1070  | 1087  | 1211  | 1193  | 1189  | 1044  | Daglb         |
| Dalrd3        | 2729  | 3572  | 3133  | 3254  | 3186  | 2846  | 3072  | 1937  | 2270  | 2559  | 2253  | 2482  | 2057  | 2071  | 2579  | 2890  | 3315  | 3333  | 3490  | 3031  | 3044  | 2264  | 2353  | 2491  | 2296  | 2580  | 2042  | 1917  | Dalrd3        |
| Dand5         | 197   | 201   | 211   | 252   | 271   | 291   | 2     |       |       |       |       |       |       |       |       |       |       |       |       |       |       |       |       |       |       |       |       |       |               |



|          |       |       |       |       |       |       |       |       |       |       |       |       |       |       |       |       |       |       |       |       |       |       |       |       |       |       |       |       |          |
|----------|-------|-------|-------|-------|-------|-------|-------|-------|-------|-------|-------|-------|-------|-------|-------|-------|-------|-------|-------|-------|-------|-------|-------|-------|-------|-------|-------|-------|----------|
| Dcaf12   | 7171  | 7253  | 8126  | 8156  | 7666  | 7407  | 7976  | 6165  | 5820  | 5682  | 5655  | 6126  | 6028  | 6250  | 6928  | 6136  | 8051  | 8294  | 8419  | 7100  | 8123  | 6527  | 5767  | 6311  | 6950  | 6448  | 5808  | 6111  | Dcaf12   |
| Dcaf121  | 523   | 442   | 693   | 515   | 717   | 673   | 607   | 924   | 1071  | 910   | 1039  | 1090  | 1051  | 882   | 538   | 552   | 576   | 640   | 755   | 569   | 553   | 1140  | 1216  | 926   | 898   | 1194  | 968   | 933   | Dcaf121  |
| Dcaf1212 | 53    | 36    | 62    | 31    | 56    | 42    | 49    | 82    | 126   | 91    | 99    | 88    | 112   | 73    | 46    | 61    | 59    | 40    | 48    | 30    | 26    | 95    | 139   | 76    | 112   | 80    | 92    | 96    | Dcaf1212 |
| Dcaf13   | 2355  | 1761  | 2365  | 1596  | 1372  | 2275  | 2182  | 2521  | 1879  | 1330  | 1198  | 1537  | 1418  | 1622  | 2226  | 1826  | 1700  | 1525  | 1529  | 1815  | 1584  | 2141  | 1421  | 1423  | 1379  | 2042  | 1684  | 1702  | Dcaf13   |
| Dcaf15   | 2234  | 2616  | 2868  | 2869  | 3082  | 2680  | 2725  | 3515  | 4071  | 4377  | 3848  | 5227  | 4601  | 4635  | 2337  | 2275  | 2998  | 2746  | 3397  | 2725  | 2704  | 4612  | 3783  | 4533  | 4601  | 5514  | 4872  | 4615  | Dcaf15   |
| Dcaf17   | 2476  | 2051  | 1905  | 1916  | 1962  | 2330  | 2227  | 3464  | 3202  | 3055  | 2822  | 3407  | 3298  | 3143  | 2370  | 2106  | 2027  | 1840  | 1960  | 2301  | 2119  | 2866  | 3076  | 2827  | 3009  | 2573  | 3862  | 3259  | Dcaf17   |
| Dcaf4    | 2235  | 2375  | 1877  | 2183  | 2137  | 2339  | 2198  | 1961  | 2211  | 1914  | 1877  | 1711  | 1855  | 1878  | 2040  | 2069  | 2152  | 2376  | 2336  | 2156  | 2182  | 1856  | 2075  | 1994  | 1914  | 1818  | 1765  | 1792  | Dcaf4    |
| Dcaf5    | 5294  | 5175  | 6025  | 6202  | 7151  | 6531  | 6127  | 6883  | 6854  | 7681  | 7034  | 7772  | 7659  | 7255  | 5396  | 5065  | 6102  | 6191  | 7381  | 5763  | 6399  | 8263  | 6590  | 7135  | 8105  | 6988  | 7259  | 7471  | Dcaf5    |
| Dcaf6    | 4510  | 3898  | 3811  | 4349  | 4482  | 4777  | 4687  | 3076  | 2989  | 2972  | 3286  | 2673  | 2558  | 2394  | 4512  | 4059  | 3833  | 4562  | 4209  | 4223  | 4617  | 3377  | 3242  | 2735  | 2885  | 2261  | 2642  | 2388  | Dcaf6    |
| Dcaf7    | 25233 | 25179 | 25243 | 30790 | 31504 | 30536 | 31429 | 22427 | 23054 | 24732 | 23033 | 24522 | 22781 | 23586 | 26373 | 24593 | 28685 | 29653 | 32935 | 26380 | 32530 | 25887 | 21126 | 24390 | 26595 | 20697 | 23730 | 23326 | Dcaf7    |
| Dcafd    | 8119  | 7971  | 7564  | 7265  | 7734  | 8116  | 7945  | 12355 | 12734 | 12157 | 13398 | 13025 | 13522 | 13387 | 7743  | 7068  | 7862  | 6895  | 8000  | 8067  | 7956  | 10875 | 13035 | 12687 | 12348 | 12940 | 14046 | 13492 | Dcafd    |
| Dcakd    | 7095  | 9618  | 9650  | 8077  | 7869  | 7366  | 6835  | 6999  | 9196  | 8885  | 8271  | 11267 | 9067  | 9464  | 6700  | 8535  | 9491  | 7754  | 8747  | 6544  | 7092  | 8128  | 8348  | 10015 | 9668  | 13354 | 9710  | 10109 | Dcakd    |
| Dcbld1   | 2629  | 2406  | 2539  | 2182  | 2572  | 2440  | 2739  | 1501  | 1419  | 1424  | 1288  | 1552  | 1463  | 1580  | 2418  | 2307  | 2431  | 2265  | 2374  | 2153  | 2529  | 1253  | 1364  | 1396  | 1424  | 1761  | 1469  | 1601  | Dcbld1   |
| Dcbld2   | 12650 | 12570 | 12076 | 11724 | 10910 | 10870 | 11202 | 6708  | 5925  | 6256  | 6346  | 7275  | 7152  | 7358  | 13471 | 13196 | 11224 | 11438 | 10082 | 10221 | 10584 | 6924  | 5858  | 6273  | 6585  | 6993  | 7405  | 7665  | Dcbld2   |
| Dcc      | 18475 | 19200 | 16649 | 24943 | 23653 | 28999 | 27412 | 23746 | 18709 | 21688 | 17619 | 24881 | 26244 | 26601 | 22801 | 19365 | 21261 | 21715 | 24582 | 26049 | 28310 | 22331 | 16589 | 19502 | 26568 | 14216 | 27902 | 24683 | Dcc      |
| Dcdc2a   | 264   | 237   | 345   | 236   | 337   | 278   | 242   | 326   | 278   | 299   | 298   | 428   | 456   | 382   | 332   | 354   | 234   | 277   | 287   | 396   | 263   | 374   | 474   | 287   | 327   | 334   | 292   | 375   | Dcdc2a   |
| Dcdc2b   | 249   | 323   | 286   | 384   | 452   | 373   | 330   | 308   | 279   | 295   | 282   | 263   | 234   | 312   | 257   | 288   | 442   | 446   | 432   | 315   | 385   | 424   | 300   | 303   | 322   | 244   | 224   | 224   | Dcdc2b   |
| Dcdc2c   | 0     | 0     | 0     | 0     | 0     | 0     | 2     | 0     | 2     | 0     | 0     | 0     | 0     | 2     | 0     | 0     | 0     | 3     | 0     | 0     | 0     | 2     | 3     | 5     | 0     | 0     | 0     | 0     | Dcdc2c   |
| Dchs1    | 7814  | 9040  | 8763  | 8964  | 10731 | 10632 | 7659  | 15277 | 20163 | 22170 | 22052 | 23811 | 20720 | 20054 | 6749  | 9524  | 9525  | 9949  | 11123 | 6697  | 8668  | 23487 | 17404 | 22776 | 23456 | 14275 | 19107 | 18770 | Dchs1    |
| Dchs2    | 578   | 701   | 250   | 361   | 679   | 714   | 458   | 509   | 603   | 423   | 593   | 118   | 406   | 106   | 754   | 850   | 316   | 457   | 422   | 623   | 555   | 344   | 750   | 105   | 322   | 40    | 241   | 114   | Dchs2    |
| Dck      | 7507  | 6220  | 7823  | 7081  | 6632  | 6938  | 8152  | 7184  | 5897  | 6292  | 5561  | 8616  | 7156  | 8689  | 7539  | 6488  | 7788  | 6682  | 7511  | 7347  | 7461  | 6315  | 5492  | 7491  | 7321  | 9483  | 8608  | 9252  | Dck      |
| Dck1     | 16222 | 14708 | 13806 | 22411 | 30354 | 28020 | 29376 | 29224 | 27870 | 31454 | 28149 | 26523 | 24930 | 28818 | 19386 | 16600 | 18212 | 24751 | 25988 | 24658 | 29775 | 37864 | 26088 | 26593 | 35960 | 18119 | 25048 | 25362 | Dck1     |
| Dck2     | 10388 | 11750 | 9210  | 14888 | 19676 | 17554 | 18355 | 16893 | 17959 | 20551 | 17291 | 21194 | 15536 | 20622 | 11122 | 9179  | 13420 | 16522 | 19518 | 15490 | 19606 | 21784 | 14087 | 19828 | 25244 | 12970 | 18152 | 17014 | Dck2     |
| Dck3     | 201   | 204   | 187   | 188   | 486   | 278   | 288   | 266   | 310   | 316   | 281   | 100   | 187   | 109   | 237   | 206   | 217   | 321   | 299   | 209   | 274   | 349   | 241   | 205   | 220   | 110   | 89    | 74    | Dck3     |
| Dclre1a  | 667   | 449   | 493   | 453   | 533   | 552   | 503   | 1272  | 1310  | 1201  | 1064  | 1212  | 1224  | 1189  | 683   | 526   | 469   | 436   | 568   | 635   | 512   | 1031  | 1269  | 1116  | 1048  | 1167  | 1291  | 1229  | Dclre1a  |
| Dclre1b  | 2143  | 1998  | 1774  | 1842  | 1683  | 1865  | 1989  | 1649  | 1655  | 1501  | 1498  | 2040  | 1724  | 2134  | 1882  | 2002  | 1869  | 1842  | 1841  | 1725  | 1936  | 1432  | 1570  | 1731  | 1647  | 2003  | 2097  | 2166  | Dclre1b  |
| Dclre1c  | 3095  | 2897  | 2021  | 2736  | 2172  | 2831  | 2778  | 1568  | 1521  | 1266  | 1393  | 1412  | 1491  | 1510  | 3112  | 3033  | 2341  | 2656  | 2173  | 2689  | 2638  | 1512  | 1498  | 1273  | 1340  | 1127  | 1403  | 1311  | Dclre1c  |
| Dcn      | 1944  | 1437  | 1554  | 1848  | 2388  | 2789  | 2014  | 3778  | 6058  | 3906  | 6694  | 2526  | 2911  | 2546  | 2193  | 1845  | 1497  | 3152  | 1947  | 2999  | 2122  | 4269  | 9378  | 3675  | 3850  | 2379  | 2493  | 2360  | Dcn      |
| Dcp1a    | 3758  | 3327  | 3482  | 3319  | 3181  | 3262  | 3386  | 3794  | 4128  | 3952  | 4240  | 4567  | 4710  | 4600  | 3047  | 3562  | 3479  | 3292  | 3338  | 3059  | 3267  | 3898  | 3704  | 4304  | 4247  | 4349  | 4502  | 4580  | Dcp1a    |
| Dcp1b    | 1481  | 1769  | 1919  | 2174  | 2360  | 2194  | 2416  | 2313  | 2348  | 2957  | 2546  | 2911  | 2675  | 2985  | 1655  | 1460  | 2274  | 2206  | 2392  | 1998  | 2183  | 2971  | 2261  | 2875  | 3062  | 2569  | 2881  | 2688  | Dcp1b    |
| Dcp2     | 16879 | 13465 | 12074 | 12567 | 12925 | 14599 | 14124 | 12115 | 11136 | 10494 | 11901 | 13016 | 12277 | 13430 | 15093 | 16692 | 12672 | 13422 | 12211 | 13357 | 13691 | 9453  | 10452 | 10092 | 11053 | 9042  | 14061 | 12245 | Dcp2     |
| Dcps     | 2092  | 2340  | 1971  | 1607  | 1398  | 1682  | 1662  | 2448  | 2378  | 2056  | 1959  | 2498  | 2198  | 2645  | 2189  | 1912  | 1920  | 1574  | 1800  | 1959  | 1658  | 2037  | 2379  | 2262  | 2225  | 3010  | 2700  | 2816  | Dcps     |
| Dcst1    | 5     | 3     | 3     | 5     | 2     | 5     | 3     | 9     | 4     | 14    | 5     | 4     | 1     | 1     | 7     | 6     | 11    | 2     | 1     | 0     | 0     | 3     | 4     | 5     | 3     | 1     | 0     | 0     | Dcst1    |
| Dcst2    | 93    | 81    | 78    | 156   | 128   | 135   | 115   | 42    | 70    | 52    | 73    | 60    | 84    | 63    | 121   | 103   | 116   | 164   | 85    | 115   | 104   | 89    | 53    | 68    | 56    | 70    | 85    | 70    | Dcst2    |
| Dcstamp  | 0     | 0     | 0     | 4     | 2     | 2     | 0     | 1     | 2     | 0     | 2     | 0     | 3     | 4     | 1     | 1     | 0     | 0     | 0     | 0     | 0     | 1     | 2     | 2     | 2     | 0     | 0     | 0     | Dcstamp  |
| Dct      | 233   | 155   | 152   | 167   | 204   | 317   | 396   | 402   | 699   | 493   | 465   | 469   | 414   | 502   | 199   | 149   | 126   | 234   | 265   | 271   | 360   | 82    | 310   | 510   | 469   | 472   | 329   | 422   | Dct      |
| Dctd     | 1414  | 1405  | 1542  | 1258  | 1021  | 1004  | 1075  | 1299  | 1521  | 1277  | 1593  | 1604  | 1591  | 1402  | 1350  | 1589  | 1325  | 1307  | 1099  | 1098  | 926   | 1384  | 1555  | 1649  | 1168  | 2147  | 1541  | 1620  | Dctd     |
| Dctn1    | 13489 | 17652 | 18651 | 20944 | 19992 | 17109 | 16777 | 11617 | 14411 | 16513 | 15337 | 16252 | 15715 | 15382 | 13718 | 16733 | 20982 | 20881 | 20677 | 14672 | 17889 | 16289 | 13083 | 16766 | 16904 | 14897 | 13661 | 14709 | Dctn1    |
| Dctn2    | 11236 | 13040 | 12803 | 14270 | 13961 | 12762 | 13006 | 12634 | 13353 | 14681 | 13446 | 14192 | 13192 | 14742 | 11905 | 11695 | 14188 | 13553 | 14677 | 12600 | 14008 | 14375 | 13145 | 14424 | 15152 | 14259 | 13655 | 13905 | Dctn2    |
| Dctn3    | 3901  | 4768  | 4124  | 5031  | 4248  | 4096  | 4789  | 2820  | 2892  | 3194  | 2812  | 2880  | 2849  | 3626  | 3695  | 3750  | 4480  | 4592  | 4700  | 4561  | 4794  | 2775  | 3075  | 3259  | 3656  | 3113  | 3056  | 3322  | Dctn3    |
| Dctn4    | 7750  | 6862  | 6457  | 6238  | 6661  | 6737  | 7504  | 11363 | 9523  | 8516  | 8678  | 9689  | 9135  | 9810  | 7920  | 6653  | 6712  | 6079  | 6992  | 7933  | 7084  | 10059 | 9745  | 8917  | 9788  | 9308  | 10058 | 10047 | Dctn4    |
| Dctn5    | 6238  | 6278  | 6258  | 5814  | 5276  | 5306  | 5671  | 7330  | 6069  | 6180  | 6119  | 6562  | 6203  | 6673  | 6442  | 5822  | 5993  | 5447  | 5485  | 6149  | 5510  | 6727  | 6109  | 6458  | 6675  | 6588  | 6503  | 6958  | Dctn5    |
| Dctn6    | 2796  | 3085  | 2966  | 3111  | 3215  | 3131  | 3268  | 3335  | 3438  | 3681  | 3778  | 3631  | 3484  | 3865  | 3045  | 3001  | 3087  | 3034  | 3075  | 3506  | 3370  | 3317  | 3460  | 3720  | 3830  | 3794  | 3698  | 3648  | Dctn6    |
| Dctpp1   | 3552  | 4607  | 4128  | 4212  | 2955  | 3380  | 3498  | 2109  | 2135  | 2134  | 2130  | 2702  | 2469  | 2802  | 3294  | 3291  | 3898  | 3684  | 4030  | 4295  | 3780  | 1424  | 2128  | 2495  | 2506  | 3449  | 3181  | 3160  | Dctpp1   |
| Dcun1d1  | 5358  | 4038  | 5081  | 5025  | 4426  | 4643  | 5376  | 6361  | 5109  | 4368  | 4778  | 4993  | 5101  | 5764  | 5714  | 4878  | 4632  | 4625  | 4739  | 5789  | 5110  | 4979  | 5259  | 4930  | 4952  | 5684  | 5484  | 5801  | Dcun1d1  |
| Dcun1d2  | 3135  | 4101  | 2998  | 3596  | 3254  | 3238  | 3356  | 2860  | 2746  | 2646  | 2608  | 3256  | 2514  | 2527  | 3277  | 3477  | 3474  | 3607  | 3259  | 3621  | 3601  | 2520  | 2776  | 2529  | 2758  | 2558  | 2547  | 2481  | Dcun1d2  |
| Dcun1d3  | 2067  | 1963  | 2268  | 2333  | 2311  | 2302  | 2525  | 2204  | 1814  |       |       |       |       |       |       |       |       |       |       |       |       |       |       |       |       |       |       |       |          |

|        |       |       |       |       |       |       |       |        |        |        |        |        |        |        |       |       |       |       |       |       |       |        |        |        |        |        |        |        |        |       |
|--------|-------|-------|-------|-------|-------|-------|-------|--------|--------|--------|--------|--------|--------|--------|-------|-------|-------|-------|-------|-------|-------|--------|--------|--------|--------|--------|--------|--------|--------|-------|
| Ddx21  | 16295 | 16308 | 14143 | 13036 | 10586 | 12025 | 12336 | 13345  | 11900  | 10946  | 11162  | 13344  | 12591  | 13839  | 15602 | 15021 | 12506 | 12265 | 11065 | 13298 | 11631 | 10691  | 11327  | 12055  | 12045  | 13547  | 14686  | 13992  | Ddx21  |       |
| Ddx23  | 7545  | 8598  | 10031 | 8527  | 7975  | 7759  | 7490  | 8264   | 8989   | 9259   | 8706   | 10526  | 9878   | 10116  | 7247  | 7623  | 9332  | 7776  | 8892  | 7861  | 7667  | 7912   | 8690   | 10421  | 9662   | 11479  | 10828  | 10839  | Ddx23  |       |
| Ddx24  | 8612  | 10095 | 8333  | 8512  | 8038  | 7953  | 8160  | 7215   | 7556   | 7813   | 7075   | 8072   | 7654   | 7733   | 8227  | 8273  | 8196  | 8115  | 8273  | 8208  | 8300  | 6894   | 7236   | 7770   | 7958   | 8070   | 8133   | 8275   | Ddx24  |       |
| Ddx25  | 2030  | 2082  | 1800  | 2348  | 3296  | 2594  | 3095  | 3123   | 2860   | 2852   | 2473   | 2262   | 2141   | 2358   | 2331  | 1858  | 1874  | 2615  | 2805  | 2882  | 3012  | 3434   | 2583   | 2315   | 2847   | 1826   | 2097   | 2074   | Ddx25  |       |
| Ddx27  | 4284  | 5030  | 5807  | 4914  | 3975  | 4054  | 4440  | 3042   | 3405   | 3589   | 3226   | 4403   | 3638   | 4310   | 4247  | 4415  | 5003  | 4408  | 4305  | 4001  | 4302  | 3190   | 3180   | 4120   | 3619   | 4743   | 4170   | 4457   | Ddx27  |       |
| Ddx28  | 786   | 1024  | 906   | 749   | 727   | 829   | 786   | 847    | 952    | 833    | 818    | 924    | 812    | 884    | 787   | 774   | 889   | 754   | 913   | 783   | 778   | 896    | 909    | 834    | 876    | 1127   | 877    | 878    | Ddx28  |       |
| Ddx31  | 1577  | 1748  | 1336  | 1499  | 1296  | 1367  | 1344  | 1265   | 1124   | 972    | 1038   | 1183   | 1139   | 1149   | 1481  | 1607  | 1374  | 1473  | 1428  | 1473  | 1347  | 1068   | 1116   | 1115   | 1143   | 1298   | 1158   | 1244   | Ddx31  |       |
| Ddx39a | 5269  | 5949  | 5883  | 5123  | 4124  | 4461  | 4456  | 4452   | 4367   | 4127   | 3862   | 6014   | 5256   | 5451   | 4803  | 5201  | 5532  | 4318  | 4960  | 4835  | 4391  | 3459   | 4071   | 5350   | 4628   | 7027   | 6358   | 6344   | Ddx39a |       |
| Ddx39b | 17154 | 20394 | 21185 | 18785 | 18538 | 18083 | 19600 | 62112  | 25828  | 26939  | 25215  | 33435  | 28846  | 33258  | 15662 | 16658 | 21554 | 17500 | 21589 | 17869 | 19091 | 25185  | 23692  | 30894  | 29530  | 36421  | 32115  | 34234  | Ddx39b |       |
| Ddx3x  | 49189 | 35183 | 35853 | 32070 | 35886 | 40247 | 42039 | 68255  | 59926  | 50953  | 51179  | 66059  | 62438  | 69361  | 51907 | 41821 | 35371 | 34076 | 36246 | 48670 | 41409 | 60771  | 64668  | 61635  | 60520  | 70589  | 80580  | 74375  | Ddx3x  |       |
| Ddx3y  | 7459  | 4907  | 5753  | 6398  | 6215  | 7221  | 7940  | 5787   | 6751   | 5338   | 5806   | 6446   | 6445   | 6837   | 15    | 0     | 0     | 0     | 0     | 2     | 0     | 3      | 32     | 0      | 0      | 4      | 0      | 1      | Ddx3y  |       |
| Ddx4   | 305   | 263   | 326   | 392   | 314   | 355   | 351   | 212    | 199    | 225    | 192    | 190    | 240    | 163    | 305   | 272   | 391   | 344   | 287   | 286   | 359   | 190    | 158    | 165    | 176    | 153    | 171    | 160    | Ddx4   |       |
| Ddx41  | 3429  | 3828  | 3293  | 3383  | 3093  | 3005  | 3248  | 3615   | 3814   | 3812   | 3499   | 4098   | 3565   | 3837   | 3059  | 3344  | 3376  | 3136  | 3313  | 3174  | 3191  | 3384   | 3592   | 3787   | 3793   | 4444   | 3934   | 4109   | Ddx41  |       |
| Ddx42  | 15476 | 13626 | 15190 | 15007 | 14205 | 14578 | 15193 | 14544  | 13222  | 13982  | 14012  | 15937  | 14466  | 16888  | 15616 | 14160 | 14915 | 14498 | 14039 | 14576 | 14273 | 14156  | 12860  | 15173  | 15386  | 15580  | 16014  | 15958  | Ddx42  |       |
| Ddx43  | 277   | 213   | 315   | 271   | 327   | 399   | 321   | 73     | 51     | 71     | 98     | 71     | 42     | 67     | 315   | 312   | 238   | 310   | 296   | 288   | 295   | 109    | 69     | 61     | 72     | 51     | 53     | 62     | Ddx43  |       |
| Ddx46  | 23836 | 21395 | 19653 | 20508 | 19367 | 21689 | 22693 | 17046  | 14885  | 14884  | 14378  | 17023  | 16147  | 17999  | 23911 | 22003 | 19883 | 20265 | 19368 | 22898 | 22518 | 13754  | 13893  | 14963  | 15552  | 15242  | 17235  | 16962  | Ddx46  |       |
| Ddx47  | 5045  | 4979  | 4716  | 4637  | 4123  | 4504  | 4523  | 5893   | 5699   | 5580   | 5505   | 6218   | 5924   | 6158   | 4634  | 4299  | 4715  | 4229  | 4562  | 4638  | 4322  | 5168   | 5363   | 5830   | 5445   | 6602   | 6157   | 6337   | Ddx47  |       |
| Ddx49  | 2864  | 3992  | 3218  | 3353  | 2738  | 2870  | 2662  | 2330   | 2616   | 2503   | 2461   | 2720   | 2508   | 2357   | 2852  | 3297  | 3314  | 3127  | 3039  | 2846  | 2847  | 2217   | 2614   | 2664   | 2704   | 3148   | 2731   | 2716   | Ddx49  |       |
| Ddx5   | 74058 | 63475 | 73504 | 70610 | 78983 | 75598 | 88357 | 128582 | 105177 | 108426 | 103415 | 123624 | 111468 | 131907 | 80926 | 64119 | 76166 | 72081 | 75768 | 84048 | 81584 | 121269 | 100349 | 116913 | 121632 | 121425 | 119463 | 123441 | Ddx5   |       |
| Ddx50  | 11575 | 8983  | 9742  | 9200  | 8344  | 9202  | 9971  | 9884   | 9410   | 8404   | 9843   | 8941   | 9045   | 9555   | 11402 | 10192 | 9136  | 9118  | 8389  | 10076 | 8786  | 8696   | 9417   | 9595   | 8747   | 9717   | 9174   | 9400   | Ddx50  |       |
| Ddx51  | 2140  | 2096  | 1938  | 2061  | 1777  | 1887  | 1963  | 2133   | 2122   | 2004   | 2167   | 2581   | 2326   | 2316   | 1942  | 1980  | 1801  | 1865  | 1825  | 1726  | 1885  | 2055   | 2042   | 2124   | 2113   | 2220   | 2420   | 2299   | Ddx51  |       |
| Ddx52  | 4474  | 3640  | 3881  | 3209  | 3187  | 3327  | 4027  | 5945   | 4789   | 4345   | 4262   | 5582   | 5034   | 5726   | 4675  | 3826  | 3501  | 2864  | 3422  | 4352  | 3556  | 4338   | 4842   | 4788   | 4482   | 5919   | 5944   | 5948   | Ddx52  |       |
| Ddx54  | 4818  | 6264  | 7611  | 6720  | 5773  | 5581  | 5377  | 3866   | 4697   | 5478   | 5184   | 6243   | 5451   | 5735   | 5648  | 7544  | 6198  | 6371  | 4801  | 5617  | 4607  | 4734   | 6064   | 5474   | 6955   | 5670   | 5868   | Ddx54  |        |       |
| Ddx55  | 2606  | 2774  | 2869  | 3292  | 2846  | 2746  | 2971  | 2214   | 2210   | 2733   | 2524   | 2701   | 2677   | 3021   | 2505  | 2484  | 2965  | 3174  | 2865  | 2611  | 2936  | 2689   | 2163   | 2850   | 3080   | 2443   | 2487   | 2880   | Ddx55  |       |
| Ddx56  | 2707  | 3027  | 2851  | 2647  | 2583  | 2644  | 2690  | 2510   | 2949   | 2825   | 2886   | 3598   | 3197   | 3252   | 2454  | 2772  | 2707  | 2597  | 2766  | 2308  | 2630  | 2613   | 2868   | 3063   | 3059   | 3729   | 3510   | 3603   | Ddx56  |       |
| Ddx58  | 864   | 543   | 605   | 640   | 518   | 600   | 516   | 578    | 692    | 667    | 909    | 449    | 634    | 474    | 750   | 771   | 521   | 471   | 481   | 631   | 520   | 495    | 826    | 573    | 435    | 553    | 499    | 485    | Ddx58  |       |
| Ddx59  | 639   | 724   | 643   | 732   | 574   | 569   | 626   | 874    | 961    | 863    | 691    | 944    | 684    | 891    | 996   | 774   | 639   | 688   | 576   | 632   | 702   | 646    | 795    | 913    | 913    | 839    | 1041   | 1074   | 1010   | Ddx59 |
| Ddx6   | 23598 | 17797 | 22224 | 23552 | 25598 | 24042 | 28253 | 39787  | 34826  | 37316  | 38980  | 37866  | 38166  | 44878  | 22740 | 18235 | 23235 | 22734 | 25647 | 24508 | 28593 | 35511  | 34502  | 40603  | 42318  | 34811  | 40883  | 44794  | Ddx6   |       |
| Ddx60  | 39    | 26    | 12    | 24    | 24    | 44    | 17    | 50     | 44     | 78     | 75     | 64     | 60     | 61     | 29    | 40    | 22    | 41    | 33    | 58    | 31    | 62     | 101    | 37     | 45     | 75     | 80     | 65     | Ddx60  |       |
| Deaf1  | 1991  | 2475  | 2166  | 2744  | 3463  | 2731  | 2618  | 3533   | 3756   | 4175   | 4023   | 3796   | 3830   | 3604   | 2090  | 2106  | 2356  | 2542  | 3162  | 2741  | 2819  | 4415   | 3638   | 4138   | 4533   | 4069   | 3574   | 3628   | Deaf1  |       |
| Deaf2  | 1644  | 1499  | 1755  | 1222  | 1172  | 1254  | 1143  | 1895   | 1676   | 1452   | 1802   | 1842   | 1983   | 1852   | 1631  | 1700  | 1322  | 1085  | 1116  | 1290  | 1188  | 1462   | 1972   | 1574   | 1525   | 1961   | 2186   | 1919   | Deaf2  |       |
| Decr2  | 1142  | 1191  | 1307  | 1277  | 1244  | 1190  | 1241  | 1523   | 1643   | 1846   | 1797   | 1654   | 1761   | 1864   | 1077  | 1243  | 1265  | 1132  | 1216  | 1137  | 1146  | 1569   | 1709   | 1753   | 1695   | 1979   | 1668   | 1760   | Decr2  |       |
| Dedd   | 2312  | 2463  | 2893  | 2711  | 2673  | 2340  | 2705  | 2742   | 2671   | 2990   | 2944   | 2902   | 2834   | 3285   | 2039  | 2313  | 3099  | 2530  | 2763  | 2444  | 2706  | 2836   | 2640   | 3145   | 3028   | 3164   | 3122   | 3125   | Dedd   |       |
| Dedd2  | 3008  | 3416  | 3310  | 4214  | 3435  | 3314  | 3300  | 1362   | 1359   | 1795   | 1535   | 1309   | 1309   | 1343   | 2699  | 3004  | 3682  | 4004  | 3702  | 3008  | 3444  | 1579   | 1370   | 1730   | 1737   | 1430   | 1221   | 1321   | Dedd2  |       |
| Def6   | 98    | 85    | 133   | 96    | 97    | 111   | 75    | 187    | 263    | 256    | 274    | 164    | 235    | 179    | 92    | 122   | 105   | 77    | 102   | 96    | 104   | 232    | 330    | 242    | 207    | 267    | 180    | 198    | Def6   |       |
| Def8   | 2413  | 2540  | 2247  | 2046  | 2644  | 2608  | 2137  | 3861   | 4411   | 3839   | 3643   | 4043   | 3967   | 3780   | 2211  | 2111  | 2196  | 2115  | 2544  | 2372  | 2326  | 4002   | 4335   | 3701   | 4062   | 4236   | 3962   | 3779   | Def8   |       |
| Defa17 | 0     | 0     | 0     | 0     | 0     | 0     | 0     | 0      | 0      | 0      | 0      | 0      | 0      | 0      | 1     | 0     | 0     | 0     | 0     | 0     | 0     | 0      | 0      | 0      | 0      | 0      | 0      | 0      | Defa17 |       |
| Defa21 | 0     | 0     | 0     | 0     | 2     | 0     | 0     | 0      | 0      | 0      | 0      | 0      | 0      | 0      | 0     | 0     | 0     | 0     | 0     | 0     | 0     | 0      | 0      | 0      | 0      | 0      | 0      | 0      | Defa21 |       |
| Defa39 | 0     | 0     | 0     | 0     | 0     | 0     | 0     | 0      | 0      | 0      | 0      | 0      | 0      | 0      | 1     | 0     | 0     | 0     | 0     | 0     | 0     | 0      | 0      | 0      | 0      | 0      | 0      | 0      | Defa39 |       |
| Defb1  | 2     | 1     | 0     | 1     | 0     | 0     | 0     | 1      | 3      | 1      | 11     | 4      | 7      | 2      | 0     | 2     | 2     | 0     | 0     | 0     | 0     | 0      | 0      | 2      | 0      | 0      | 0      | 12     | 1      | Defb1 |
| Defb10 | 1     | 0     | 0     | 0     | 0     | 0     | 0     | 1      | 0      | 3      | 1      | 0      | 0      | 0      | 0     | 2     | 0     | 0     | 0     | 0     | 0     | 3      | 0      | 0      | 0      | 0      | 0      | 0      | Defb10 |       |
| Defb11 | 22    | 29    | 0     | 0     | 30    | 21    | 9     | 42     | 36     | 47     | 24     | 29     | 70     | 12     | 20    | 31    | 1     | 0     | 5     | 3     | 18    | 33     | 63     | 17     | 8      | 5      | 8      | 4      | Defb11 |       |
| Defb13 | 0     | 0     | 0     | 0     | 0     | 0     | 0     | 0      | 0      | 0      | 0      | 0      | 0      | 0      | 0     | 0     | 0     | 0     | 2     | 0     | 0     | 0      | 0      | 0      | 0      | 0      | 1      | 0      | Defb13 |       |
| Defb15 | 0     | 0     | 0     | 0     | 3     | 0     | 0     | 0      | 2      | 0      | 0      | 0      | 0      | 0      | 1     | 0     | 0     | 0     | 0     | 0     | 0     | 0      | 0      | 0      | 0      | 0      | 0      | 0      | Defb15 |       |
| Defb2  | 0     | 0     | 0     | 0     | 0     | 0     | 0     | 0      | 1      | 0      | 0      | 0      | 2      | 0      | 0     | 1     | 0     | 0     | 0     | 0     | 0     | 2      | 1      | 0      | 0      | 0      | 0      | 0      | Defb2  |       |
| Defb20 | 0     | 1     | 0     | 0     | 2     | 0     | 0     | 0      | 1      | 0      | 1      | 0      | 0      | 1      | 4     | 0     | 0     | 0     | 1     | 2     | 1     | 0      | 0      | 2      | 0      | 0      | 0      | 0      | Defb20 |       |
| Defb25 | 3     | 1     | 0     | 0     | 0     | 2     | 1     | 0      | 3      | 3      | 1      | 0      | 1      | 0      | 3     | 0     | 0     | 0     | 3     | 0     | 2     | 0      | 1      | 1      | 0      | 0      | 0      | 1      | Defb25 |       |
| Defb28 | 0     | 0     | 0     | 0     | 2     | 0     | 0     | 0      | 0      | 0      | 0      | 0      | 0      | 0      | 0     | 0     | 0     | 0     | 0     | 0     | 0     | 0      | 0      | 0      | 0      | 0      | 0      | 0      | Defb28 |       |
| Defb3  | 0     | 0     | 0     | 0     | 0     | 0     | 0     | 0      | 0      | 0      | 0      | 0      | 0      | 0      | 0     | 0     | 0     | 0     | 4     | 0     | 0     | 0      | 0      | 0      | 0      | 0      | 0      | 0      | Defb3  |       |
| Defb30 | 0     | 1     | 0     | 6     | 0     | 0     | 2     | 0      | 0      | 0      | 0      | 0      | 2</    |        |       |       |       |       |       |       |       |        |        |        |        |        |        |        |        |       |

|         |       |       |       |       |       |       |       |      |      |      |      |       |      |      |       |       |       |       |       |       |       |      |      |      |      |       |       |        |         |       |
|---------|-------|-------|-------|-------|-------|-------|-------|------|------|------|------|-------|------|------|-------|-------|-------|-------|-------|-------|-------|------|------|------|------|-------|-------|--------|---------|-------|
| Dennd6b | 3164  | 4289  | 4412  | 5952  | 6499  | 5882  | 5519  | 4082 | 4191 | 5229 | 4391 | 5003  | 4787 | 4879 | 3684  | 3646  | 5093  | 5648  | 6287  | 5578  | 5654  | 6029 | 3491 | 4761 | 5878 | 4023  | 4821  | 4587   | Dennd6b |       |
| Denr    | 5123  | 4230  | 5847  | 4660  | 3909  | 4023  | 4550  | 4559 | 3840 | 4625 | 4262 | 4830  | 4549 | 5537 | 5081  | 4186  | 4994  | 4160  | 3998  | 4460  | 4445  | 3962 | 3918 | 4850 | 4348 | 5910  | 4918  | 5569   | Denr    |       |
| Depdc1a | 2231  | 1318  | 2009  | 1448  | 1198  | 1468  | 1663  | 2993 | 2622 | 1979 | 2020 | 2966  | 2721 | 2925 | 2074  | 1882  | 1561  | 1412  | 1496  | 2040  | 1432  | 1734 | 2556 | 2560 | 2253 | 3373  | 3151  | 3204   | Depdc1a |       |
| Depdc1b | 870   | 1008  | 1067  | 630   | 546   | 596   | 616   | 681  | 645  | 698  | 602  | 1142  | 890  | 1081 | 752   | 732   | 978   | 587   | 699   | 723   | 607   | 578  | 582  | 813  | 713  | 1256  | 1156  | 1098   | Depdc1b |       |
| Depdc5  | 8245  | 8727  | 6779  | 8128  | 7788  | 7646  | 8260  | 5040 | 5025 | 4983 | 4483 | 5176  | 4705 | 5220 | 8057  | 7795  | 7623  | 8065  | 8182  | 7327  | 8713  | 4751 | 4705 | 4796 | 5140 | 3839  | 5146  | 5258   | Depdc5  |       |
| Depdc7  | 644   | 573   | 553   | 553   | 394   | 498   | 543   | 158  | 145  | 115  | 147  | 194   | 99   | 162  | 510   | 474   | 562   | 483   | 518   | 487   | 544   | 157  | 132  | 203  | 157  | 234   | 170   | 154    | Depdc7  |       |
| Depp1   | 29    | 13    | 17    | 12    | 47    | 40    | 32    | 122  | 169  | 139  | 197  | 61    | 84   | 57   | 29    | 27    | 12    | 34    | 36    | 55    | 17    | 129  | 230  | 114  | 153  | 93    | 81    | 109    | Depp1   |       |
| Deptor  | 1162  | 1012  | 922   | 949   | 956   | 880   | 801   | 299  | 397  | 269  | 766  | 184   | 248  | 209  | 1114  | 1368  | 958   | 1026  | 916   | 928   | 893   | 302  | 654  | 234  | 285  | 204   | 205   | 220    | Deptor  |       |
| Dera    | 1223  | 1172  | 1278  | 889   | 741   | 878   | 749   | 714  | 816  | 579  | 775  | 897   | 1015 | 941  | 1203  | 1322  | 1077  | 830   | 761   | 828   | 752   | 545  | 859  | 804  | 627  | 1159  | 1027  | 1081   | Dera    |       |
| Der1    | 5781  | 6220  | 5653  | 5515  | 5310  | 5179  | 5089  | 5100 | 5066 | 4702 | 5008 | 4540  | 4740 | 4271 | 5796  | 5768  | 5668  | 5732  | 5298  | 5655  | 5052  | 5135 | 5228 | 4789 | 4749 | 4706  | 4756  | 4543   | Der1    |       |
| Der2    | 4599  | 4285  | 4284  | 4630  | 4255  | 4720  | 4929  | 5083 | 4519 | 4428 | 4630 | 4667  | 4496 | 4832 | 4822  | 4312  | 4373  | 4677  | 4622  | 5270  | 4825  | 4400 | 4401 | 4664 | 4885 | 4428  | 4799  | 4726   | Der2    |       |
| Der3    | 165   | 191   | 112   | 144   | 49    | 72    | 87    | 32   | 38   | 60   | 51   | 37    | 44   | 28   | 149   | 162   | 145   | 141   | 82    | 109   | 99    | 32   | 47   | 40   | 40   | 51    | 34    | 30     | Der3    |       |
| Des     | 218   | 131   | 130   | 62    | 103   | 55    | 80    | 143  | 437  | 137  | 2175 | 67    | 146  | 82   | 102   | 288   | 96    | 79    | 63    | 85    | 71    | 287  | 1525 | 109  | 114  | 86    | 80    | 71     | Des     |       |
| Desi1   | 5737  | 6084  | 7014  | 7428  | 6631  | 6300  | 6545  | 3083 | 2953 | 3885 | 3570 | 3905  | 3398 | 3709 | 5616  | 6232  | 6938  | 7288  | 7338  | 5224  | 6638  | 4147 | 3065 | 3740 | 4019 | 4238  | 3296  | 3857   | Desi1   |       |
| Desi2   | 236   | 174   | 147   | 308   | 293   | 186   | 143   | 96   | 77   | 56   | 235  | 83    | 77   | 70   | 218   | 178   | 159   | 391   | 141   | 120   | 145   | 132  | 181  | 74   | 82   | 78    | 208   | 65     | Desi2   |       |
| Det1    | 573   | 647   | 709   | 529   | 542   | 486   | 606   | 895  | 990  | 824  | 862  | 920   | 916  | 965  | 587   | 565   | 661   | 491   | 635   | 633   | 558   | 795  | 935  | 932  | 870  | 1032  | 1084  | 1062   | Det1    |       |
| Deup1   | 116   | 113   | 69    | 53    | 76    | 109   | 98    | 211  | 147  | 139  | 90   | 268   | 321  | 196  | 98    | 170   | 93    | 66    | 83    | 181   | 86    | 190  | 302  | 157  | 159  | 235   | 225   | 206    | Deup1   |       |
| Dexi    | 1531  | 1851  | 1417  | 1575  | 1550  | 1507  | 1395  | 800  | 875  | 1011 | 942  | 947   | 830  | 841  | 1378  | 1396  | 1527  | 1558  | 1711  | 1444  | 1502  | 842  | 854  | 857  | 839  | 1017  | 836   | 849    | Dexi    |       |
| Dffa    | 3110  | 3595  | 3312  | 3067  | 2370  | 2479  | 2164  | 1856 | 1928 | 1899 | 1982 | 2164  | 2016 | 1932 | 3080  | 3291  | 3140  | 2639  | 2523  | 2487  | 2369  | 1840 | 1878 | 1968 | 2000 | 2274  | 2106  | 2009   | Dffa    |       |
| Dffb    | 666   | 612   | 597   | 589   | 717   | 728   | 670   | 692  | 763  | 852  | 741  | 855   | 856  | 815  | 603   | 513   | 717   | 545   | 669   | 656   | 588   | 829  | 748  | 831  | 822  | 869   | 865   | 780    | Dffb    |       |
| Dgat1   | 2399  | 2479  | 2679  | 2730  | 2925  | 2942  | 2542  | 2648 | 2516 | 2803 | 2759 | 2917  | 2809 | 2711 | 2405  | 2427  | 2738  | 2937  | 2930  | 2588  | 2453  | 3253 | 2423 | 2866 | 3193 | 2933  | 2917  | 2573   | Dgat1   |       |
| Dgat2   | 806   | 958   | 1045  | 885   | 761   | 794   | 698   | 431  | 504  | 523  | 550  | 437   | 408  | 384  | 874   | 999   | 892   | 901   | 714   | 722   | 704   | 476  | 560  | 455  | 445  | 504   | 474   | 393    | Dgat2   |       |
| Dgat216 | 1     | 1     | 0     | 1     | 1     | 0     | 0     | 0    | 1    | 1    | 0    | 0     | 0    | 1    | 1     | 1     | 0     | 0     | 0     | 0     | 7     | 2    | 0    | 2    | 1    | 1     | 0     | 2      | Dgat216 |       |
| Dgcr2   | 6833  | 7502  | 8029  | 8299  | 7706  | 7241  | 7588  | 6064 | 6821 | 7631 | 7357 | 8131  | 7592 | 7615 | 6488  | 7127  | 8132  | 8386  | 8304  | 6576  | 8076  | 7738 | 6654 | 7981 | 7865 | 8680  | 7415  | 8119   | Dgcr2   |       |
| Dgcr6   | 0     | 0     | 0     | 0     | 0     | 3     | 0     | 0    | 1    | 0    | 0    | 0     | 0    | 0    | 0     | 0     | 0     | 0     | 0     | 0     | 0     | 0    | 0    | 0    | 0    | 0     | 0     | 0      | 0       | Dgcr6 |
| Dgcr8   | 0     | 0     | 0     | 0     | 0     | 0     | 0     | 0    | 1    | 0    | 0    | 0     | 0    | 0    | 0     | 0     | 0     | 0     | 0     | 0     | 0     | 0    | 0    | 0    | 0    | 0     | 0     | 0      | 0       | Dgcr8 |
| Dgka    | 1078  | 904   | 969   | 797   | 928   | 873   | 648   | 862  | 995  | 948  | 914  | 623   | 785  | 664  | 897   | 1132  | 842   | 951   | 709   | 789   | 701   | 692  | 1000 | 831  | 588  | 628   | 595   | 621    | Dgka    |       |
| Dgkb    | 442   | 320   | 240   | 433   | 514   | 481   | 745   | 503  | 482  | 429  | 424  | 330   | 295  | 441  | 401   | 316   | 272   | 511   | 524   | 645   | 617   | 411  | 571  | 466  | 473  | 402   | 331   | 319    | Dgkb    |       |
| Dgkd    | 7360  | 7706  | 6789  | 8154  | 9047  | 8617  | 8895  | 7659 | 8001 | 8066 | 8050 | 8281  | 7421 | 7872 | 7361  | 7074  | 7589  | 8128  | 9334  | 8043  | 9063  | 8326 | 7421 | 8028 | 8871 | 6611  | 7786  | 7779   | Dgkd    |       |
| Dgke    | 5328  | 5067  | 4146  | 6502  | 6182  | 6505  | 7173  | 3543 | 3317 | 3716 | 3473 | 3304  | 3352 | 3284 | 5596  | 5139  | 4979  | 7068  | 5970  | 6358  | 7057  | 3638 | 3062 | 2971 | 3736 | 2408  | 3216  | 2789   | Dgke    |       |
| Dgkg    | 25    | 16    | 5     | 20    | 80    | 38    | 73    | 21   | 28   | 51   | 54   | 8     | 6    | 18   | 13    | 19    | 22    | 42    | 65    | 31    | 70    | 37   | 48   | 31   | 47   | 22    | 5     | 7      | Dgkg    |       |
| Dgkh    | 3256  | 2696  | 1975  | 2555  | 3608  | 4227  | 3994  | 2566 | 2728 | 2114 | 3010 | 1861  | 2100 | 2156 | 3285  | 3174  | 2444  | 2982  | 2926  | 3949  | 4376  | 2515 | 2418 | 1652 | 2428 | 1206  | 2055  | 1745   | Dgkh    |       |
| Dgki    | 735   | 854   | 143   | 517   | 898   | 1243  | 988   | 876  | 987  | 728  | 754  | 503   | 590  | 579  | 837   | 646   | 247   | 515   | 605   | 1158  | 1301  | 443  | 836  | 257  | 862  | 213   | 709   | 385    | Dgki    |       |
| Dgkk    | 188   | 60    | 110   | 49    | 128   | 54    | 69    | 59   | 83   | 56   | 111  | 14    | 65   | 60   | 75    | 91    | 93    | 233   | 105   | 124   | 128   | 85   | 28   | 16   | 22   | 12    | 52    | 18     | Dgkk    |       |
| Dgkq    | 4571  | 5271  | 5181  | 5760  | 6478  | 5675  | 5169  | 3451 | 3755 | 3901 | 3873 | 3684  | 3869 | 3343 | 4478  | 5014  | 5194  | 5908  | 5810  | 4958  | 5317  | 4480 | 3444 | 3635 | 4222 | 2995  | 3535  | 3317   | Dgkq    |       |
| Dgkz    | 5192  | 6551  | 6534  | 6831  | 6544  | 5894  | 5393  | 3844 | 5031 | 5144 | 4929 | 5084  | 4882 | 4473 | 4834  | 6250  | 6424  | 6980  | 6813  | 5183  | 5588  | 4690 | 5119 | 5069 | 5046 | 5772  | 4596  | 4575   | Dgkz    |       |
| Dglucy  | 80    | 92    | 67    | 86    | 94    | 147   | 102   | 249  | 279  | 188  | 227  | 144   | 164  | 144  | 103   | 112   | 67    | 94    | 93    | 93    | 87    | 192  | 254  | 141  | 152  | 130   | 143   | 134    | Dglucy  |       |
| Dguok   | 1190  | 1183  | 1122  | 1196  | 1084  | 1176  | 1203  | 1635 | 1697 | 1606 | 1807 | 1628  | 1526 | 1647 | 1266  | 1083  | 1170  | 995   | 1237  | 1115  | 1200  | 1619 | 1724 | 1671 | 1744 | 1523  | 1696  | 1544   | Dguok   |       |
| Dhr24   | 13449 | 17538 | 17407 | 15592 | 11720 | 11984 | 11051 | 6324 | 7075 | 7750 | 6925 | 10344 | 9846 | 9544 | 13156 | 15887 | 16309 | 14453 | 12832 | 10345 | 11802 | 7143 | 6468 | 8016 | 7979 | 11307 | 10197 | 10758  | Dhr24   |       |
| Dhr7    | 4625  | 6419  | 6171  | 5825  | 4715  | 4559  | 4558  | 2880 | 3011 | 3079 | 2967 | 3956  | 3882 | 3943 | 4800  | 5347  | 5556  | 5190  | 4926  | 4080  | 4539  | 3173 | 2871 | 3385 | 3211 | 4122  | 3908  | 4326   | Dhr7    |       |
| Dhdds   | 5615  | 6154  | 6544  | 6360  | 5175  | 4799  | 5566  | 3461 | 3819 | 4114 | 4031 | 4324  | 4016 | 4017 | 5284  | 5504  | 6339  | 6241  | 5852  | 4887  | 5488  | 3882 | 3706 | 4309 | 4205 | 4771  | 4159  | 4322   | Dhdds   |       |
| Dhnd    | 221   | 222   | 415   | 182   | 241   | 236   | 258   | 449  | 376  | 529  | 489  | 559   | 607  | 651  | 249   | 178   | 298   | 237   | 234   | 227   | 214   | 493  | 361  | 584  | 537  | 630   | 639   | 653    | Dhnd    |       |
| Dhnr    | 7276  | 6031  | 6584  | 5090  | 3864  | 4628  | 5721  | 3610 | 3081 | 2950 | 2730 | 4350  | 3734 | 4670 | 6425  | 5871  | 5794  | 4429  | 4645  | 5578  | 4933  | 2405 | 2781 | 3778 | 3195 | 5273  | 4735  | 5041   | Dhnr    |       |
| Dhh     | 131   | 191   | 182   | 135   | 113   | 68    | 84    | 57   | 51   | 46   | 79   | 27    | 32   | 115  | 160   | 118   | 96    | 71    | 61    | 83    | 69    | 72   | 24   | 18   | 30   | 30    | 30    | 30     | Dhh     |       |
| Dhodh   | 1338  | 1508  | 1645  | 1612  | 1272  | 1373  | 1203  | 1069 | 1371 | 1308 | 1256 | 1425  | 1353 | 1314 | 1269  | 1368  | 1401  | 1440  | 1383  | 1145  | 1142  | 1103 | 1321 | 1356 | 1278 | 1741  | 1368  | 1441   | Dhodh   |       |
| Dhps    | 1546  | 1725  | 1599  | 1993  | 1932  | 1839  | 1935  | 1661 | 1681 | 1798 | 1481 | 1809  | 1640 | 1906 | 1573  | 1399  | 1789  | 1854  | 2097  | 2008  | 2123  | 1820 | 1716 | 1845 | 1986 | 2023  | 1718  | 1877   | Dhps    |       |
| Dhrs1   | 3869  | 4580  | 4048  | 3942  | 3534  | 3559  | 3393  | 2712 | 3129 | 2421 | 2675 | 2876  | 2812 | 2768 | 3906  | 4185  | 4051  | 3905  | 3809  | 4095  | 3346  | 2368 | 2895 | 2914 | 2721 | 3278  | 2911  | 2881   | Dhrs1   |       |
| Dhrs11  | 478   | 643   | 694   | 488   | 451   | 382   | 354   | 247  | 344  | 301  | 285  | 287   | 481  | 745  | 695   | 497   | 406   | 399   | 379   | 379   | 354   | 326  | 286  | 274  | 316  | 347   | 392   | Dhrs11 |         |       |
| Dhrs12  | 569   | 505   | 555   | 612   | 790   | 733   | 748   | 971  | 1016 | 1078 | 1008 | 918   | 844  | 871  | 587   | 460   | 621   | 738   | 820   | 671   | 729   | 1226 | 1040 | 1022 | 1148 | 996   | 905   | 895    | Dhrs12  |       |
|         |       |       |       |       |       |       |       |      |      |      |      |       |      |      |       |       |       |       |       |       |       |      |      |      |      |       |       |        |         |       |





|          |       |       |       |       |       |       |       |       |       |       |       |       |       |       |       |       |       |       |       |       |       |       |       |       |       |       |       |          |          |
|----------|-------|-------|-------|-------|-------|-------|-------|-------|-------|-------|-------|-------|-------|-------|-------|-------|-------|-------|-------|-------|-------|-------|-------|-------|-------|-------|-------|----------|----------|
| Dmx1     | 12299 | 9286  | 5191  | 7590  | 7318  | 10304 | 9683  | 9509  | 7823  | 5600  | 6084  | 6264  | 6595  | 6580  | 12212 | 10478 | 5990  | 7443  | 6742  | 11258 | 10059 | 5634  | 7515  | 4763  | 6161  | 3844  | 7182  | 5941     | Dmx1     |
| Dmx2     | 10175 | 10050 | 4815  | 9264  | 13533 | 14397 | 14275 | 12844 | 11631 | 9242  | 8956  | 7055  | 7370  | 7695  | 11707 | 9675  | 6937  | 9770  | 10751 | 15188 | 15189 | 9065  | 10460 | 6422  | 10315 | 3739  | 7168  | 6041     | Dmx2     |
| Dna2     | 1611  | 1413  | 1471  | 1325  | 1357  | 1416  | 1530  | 2231  | 2285  | 2155  | 2149  | 3116  | 2628  | 2957  | 1395  | 1462  | 1392  | 1276  | 1580  | 1576  | 1417  | 1597  | 2073  | 2553  | 2414  | 3222  | 3139  | 3280     | Dna2     |
| Dnaaf1   | 15    | 35    | 13    | 26    | 28    | 11    | 20    | 28    | 16    | 15    | 12    | 22    | 33    | 31    | 12    | 33    | 9     | 24    | 25    | 17    | 29    | 25    | 40    | 29    | 20    | 31    | 19    | 21       | Dnaaf1   |
| Dnaaf2   | 570   | 471   | 490   | 508   | 281   | 367   | 515   | 222   | 184   | 230   | 179   | 332   | 272   | 285   | 513   | 460   | 468   | 445   | 346   | 384   | 461   | 197   | 195   | 218   | 243   | 341   | 267   | 339      | Dnaaf2   |
| Dnaaf3   | 1197  | 1857  | 2143  | 1534  | 1045  | 1001  | 980   | 211   | 297   | 216   | 220   | 343   | 380   | 251   | 1064  | 1670  | 1621  | 1179  | 1100  | 1011  | 819   | 244   | 252   | 239   | 228   | 343   | 349   | 297      | Dnaaf3   |
| Dnaaf4   | 39    | 27    | 22    | 27    | 35    | 23    | 57    | 56    | 51    | 52    | 51    | 58    | 82    | 53    | 67    | 30    | 36    | 21    | 37    | 37    | 29    | 70    | 41    | 56    | 46    | 51    | 51    | 56       | Dnaaf4   |
| Dnaaf5   | 1706  | 1876  | 1816  | 1814  | 1383  | 1306  | 1415  | 1033  | 1228  | 1233  | 1135  | 1529  | 1429  | 1310  | 1436  | 1668  | 1725  | 1438  | 1634  | 1244  | 1322  | 1115  | 1224  | 1319  | 1180  | 1654  | 1379  | 1333     | Dnaaf5   |
| Dnaaf6b  | 12    | 3     | 11    | 0     | 4     | 4     | 3     | 11    | 4     | 0     | 7     | 7     | 2     | 1     | 0     | 4     | 0     | 4     | 0     | 10    | 4     | 5     | 8     | 6     | 3     | 4     | 2     | 2        | Dnaaf6b  |
| Dnaaf9   | 10022 | 10246 | 9488  | 12314 | 14202 | 13194 | 12602 | 15218 | 13868 | 15946 | 14970 | 14723 | 14804 | 15107 | 11211 | 10161 | 11136 | 11905 | 13170 | 11325 | 13129 | 18083 | 12954 | 13922 | 16979 | 9926  | 14262 | 14001    | Dnaaf9   |
| Dnah1    | 1103  | 1071  | 1089  | 851   | 794   | 950   | 824   | 1014  | 1158  | 1230  | 1022  | 1239  | 1146  | 1104  | 939   | 1249  | 964   | 732   | 773   | 994   | 822   | 1307  | 1290  | 1177  | 998   | 1369  | 1390  | 1200     | Dnah1    |
| Dnah10   | 315   | 458   | 190   | 528   | 299   | 256   | 253   | 136   | 136   | 197   | 116   | 129   | 179   | 86    | 310   | 435   | 270   | 456   | 281   | 264   | 256   | 134   | 199   | 111   | 138   | 43    | 172   | 115      | Dnah10   |
| Dnah11   | 246   | 292   | 160   | 158   | 205   | 238   | 175   | 299   | 315   | 266   | 218   | 184   | 247   | 122   | 277   | 429   | 127   | 168   | 142   | 257   | 201   | 147   | 418   | 119   | 136   | 76    | 155   | 109      | Dnah11   |
| Dnah12   | 1     | 0     | 0     | 1     | 0     | 2     | 1     | 2     | 1     | 1     | 2     | 1     | 0     | 8     | 2     | 2     | 0     | 2     | 2     | 2     | 2     | 2     | 10    | 1     | 2     | 1     | 0     | 0        | Dnah12   |
| Dnah14   | 6     | 5     | 15    | 9     | 11    | 8     | 4     | 13    | 13    | 10    | 4     | 13    | 25    | 15    | 8     | 10    | 3     | 7     | 3     | 9     | 3     | 10    | 14    | 7     | 9     | 15    | 27    | 26       | Dnah14   |
| Dnah17   | 173   | 236   | 146   | 339   | 317   | 240   | 306   | 56    | 53    | 76    | 47    | 33    | 42    | 37    | 165   | 207   | 286   | 365   | 362   | 233   | 339   | 53    | 56    | 50    | 63    | 27    | 52    | 32       | Dnah17   |
| Dnah2    | 888   | 1018  | 597   | 1069  | 1328  | 1185  | 1192  | 700   | 869   | 862   | 749   | 610   | 767   | 541   | 843   | 1055  | 829   | 1191  | 1119  | 1182  | 1297  | 886   | 929   | 524   | 794   | 310   | 572   | 394      | Dnah2    |
| Dnah3    | 24    | 48    | 10    | 14    | 49    | 72    | 34    | 66    | 57    | 55    | 46    | 49    | 83    | 23    | 34    | 84    | 8     | 23    | 34    | 75    | 39    | 42    | 122   | 25    | 25    | 26    | 48    | 31       | Dnah3    |
| Dnah5    | 278   | 336   | 223   | 216   | 214   | 279   | 266   | 327   | 245   | 180   | 146   | 223   | 323   | 293   | 367   | 336   | 253   | 220   | 239   | 378   | 301   | 247   | 276   | 176   | 199   | 118   | 392   | 235      | Dnah5    |
| Dnah6    | 205   | 295   | 30    | 87    | 359   | 251   | 227   | 382   | 516   | 348   | 317   | 267   | 437   | 117   | 243   | 419   | 65    | 149   | 217   | 320   | 292   | 348   | 891   | 114   | 255   | 88    | 191   | 90       | Dnah6    |
| Dnah7a   | 89    | 108   | 92    | 125   | 136   | 125   | 110   | 162   | 153   | 163   | 115   | 133   | 172   | 143   | 117   | 114   | 80    | 79    | 94    | 141   | 120   | 137   | 148   | 115   | 117   | 171   | 160   | 160      | Dnah7a   |
| Dnah7b   | 760   | 787   | 316   | 545   | 758   | 986   | 760   | 1473  | 1332  | 820   | 1023  | 1097  | 1042  | 1102  | 894   | 448   | 401   | 495   | 554   | 1156  | 857   | 1033  | 1418  | 632   | 888   | 551   | 1175  | 862      | Dnah7b   |
| Dnah7c   | 95    | 90    | 33    | 66    | 70    | 102   | 78    | 126   | 115   | 86    | 90    | 97    | 91    | 81    | 100   | 86    | 24    | 73    | 81    | 129   | 90    | 114   | 151   | 60    | 80    | 33    | 101   | 81       | Dnah7c   |
| Dnah8    | 268   | 276   | 204   | 140   | 159   | 197   | 126   | 219   | 217   | 152   | 217   | 192   | 246   | 156   | 248   | 363   | 129   | 185   | 124   | 113   | 109   | 196   | 302   | 176   | 157   | 159   | 200   | 180      | Dnah8    |
| Dnah9    | 527   | 682   | 362   | 465   | 695   | 563   | 523   | 679   | 569   | 434   | 524   | 421   | 841   | 298   | 765   | 769   | 391   | 445   | 450   | 811   | 585   | 461   | 752   | 265   | 440   | 160   | 501   | 326      | Dnah9    |
| Dnai1    | 224   | 285   | 198   | 252   | 164   | 214   | 166   | 104   | 107   | 104   | 80    | 134   | 108   | 88    | 245   | 276   | 229   | 219   | 192   | 218   | 215   | 104   | 125   | 81    | 126   | 71    | 93    | 100      | Dnai1    |
| Dnai2    | 209   | 257   | 218   | 266   | 269   | 264   | 204   | 210   | 263   | 277   | 234   | 245   | 294   | 193   | 224   | 284   | 229   | 248   | 225   | 210   | 211   | 297   | 289   | 169   | 207   | 222   | 223   | 216      | Dnai2    |
| Dnai3    | 129   | 141   | 43    | 109   | 151   | 123   | 94    | 123   | 144   | 139   | 70    | 111   | 206   | 78    | 133   | 176   | 81    | 107   | 83    | 116   | 130   | 154   | 241   | 98    | 68    | 60    | 60    | 61       | Dnai3    |
| Dnai4    | 2666  | 2546  | 2104  | 2384  | 1956  | 2122  | 2318  | 1575  | 1366  | 1359  | 1273  | 1393  | 1602  | 1237  | 2606  | 2682  | 2401  | 2189  | 1959  | 2067  | 2260  | 1507  | 1720  | 1343  | 1070  | 1139  | 1304  | 1121     | Dnai4    |
| Dnai1a   | 24827 | 22956 | 28990 | 28159 | 29778 | 26533 | 32992 | 44133 | 35430 | 36676 | 35238 | 37694 | 36915 | 43570 | 30071 | 24464 | 28548 | 27413 | 28860 | 33982 | 29954 | 39883 | 35472 | 40081 | 39280 | 41431 | 39409 | 43747    | Dnai1a   |
| Dnai2a   | 16903 | 14937 | 16856 | 15748 | 14897 | 14937 | 16718 | 14256 | 12615 | 12613 | 12759 | 13368 | 14200 | 11736 | 15800 | 16448 | 15408 | 15721 | 16412 | 16338 | 12936 | 13692 | 13419 | 15232 | 13419 | 15232 | 14278 | 15234    | Dnai2a   |
| Dnai3a   | 2607  | 2823  | 2842  | 2951  | 2443  | 2321  | 2528  | 2535  | 2552  | 2751  | 2828  | 2678  | 2626  | 2726  | 2505  | 2544  | 2890  | 2852  | 2615  | 2401  | 2543  | 2552  | 2821  | 2857  | 2632  | 2894  | 2736  | 2874     | Dnai3a   |
| Dnai4a   | 617   | 595   | 606   | 548   | 738   | 638   | 502   | 546   | 636   | 556   | 740   | 367   | 523   | 402   | 630   | 716   | 535   | 668   | 556   | 537   | 575   | 573   | 843   | 499   | 448   | 348   | 403   | 403      | Dnai4a   |
| Dnai1b1  | 4428  | 5372  | 4948  | 4681  | 3770  | 3782  | 3890  | 3814  | 3528  | 3507  | 3282  | 3713  | 3511  | 3571  | 4408  | 4342  | 4709  | 4305  | 4373  | 3950  | 4010  | 3775  | 3552  | 3889  | 3667  | 4546  | 3886  | 4009     | Dnai1b1  |
| Dnai1b11 | 6309  | 6263  | 7841  | 7066  | 5948  | 5728  | 6493  | 4732  | 4440  | 4869  | 5395  | 4687  | 4824  | 4996  | 6207  | 6284  | 6847  | 6891  | 6111  | 5448  | 6033  | 4931  | 4585  | 5024  | 5505  | 4940  | 5239  | Dnai1b11 |          |
| Dnai1b12 | 741   | 751   | 1000  | 965   | 938   | 862   | 759   | 1503  | 1707  | 2036  | 1842  | 2056  | 1982  | 2065  | 661   | 651   | 876   | 814   | 1015  | 753   | 839   | 1853  | 1775  | 2006  | 1866  | 2347  | 1909  | 2198     | Dnai1b12 |
| Dnai1b13 | 37    | 86    | 29    | 48    | 97    | 109   | 51    | 129   | 95    | 85    | 72    | 114   | 167   | 49    | 83    | 83    | 28    | 35    | 52    | 87    | 48    | 112   | 179   | 56    | 103   | 65    | 56    | 69       | Dnai1b13 |
| Dnai1b14 | 2303  | 1932  | 1909  | 2295  | 2911  | 3047  | 2482  | 3949  | 3882  | 3874  | 4355  | 3726  | 3742  | 3521  | 2483  | 2467  | 1969  | 2702  | 2343  | 2464  | 2695  | 4055  | 3988  | 3348  | 4218  | 2641  | 3481  | 3278     | Dnai1b14 |
| Dnai1b2  | 1694  | 2013  | 2418  | 2298  | 2507  | 2272  | 2224  | 2168  | 2512  | 2806  | 2645  | 2457  | 2606  | 2317  | 1789  | 1840  | 2561  | 2397  | 2617  | 2205  | 2143  | 2615  | 2526  | 2879  | 2716  | 2501  | 2350  | 2402     | Dnai1b2  |
| Dnai1b3  | 170   | 191   | 180   | 169   | 253   | 234   | 242   | 201   | 225   | 312   | 330   | 224   | 295   | 339   | 181   | 147   | 189   | 143   | 208   | 200   | 223   | 212   | 254   | 259   | 244   | 258   | 281   | 265      | Dnai1b3  |
| Dnai1b4  | 3823  | 3334  | 4212  | 4006  | 4435  | 4062  | 4445  | 2793  | 2500  | 2682  | 2609  | 2615  | 2963  | 2837  | 4271  | 3974  | 4175  | 4471  | 3900  | 4374  | 4173  | 2846  | 2760  | 2668  | 2588  | 3019  | 2667  | 2937     | Dnai1b4  |
| Dnai1b5  | 3017  | 4664  | 4977  | 5319  | 6143  | 5520  | 5288  | 5076  | 5517  | 6372  | 5366  | 6323  | 5114  | 6224  | 3713  | 3529  | 5773  | 5523  | 6288  | 5436  | 5654  | 6876  | 5073  | 6445  | 6994  | 5210  | 5824  | 5941     | Dnai1b5  |
| Dnai1b6  | 10430 | 9493  | 10786 | 11398 | 10835 | 10349 | 12094 | 10978 | 9328  | 9890  | 8542  | 9744  | 8657  | 10272 | 11879 | 9569  | 10805 | 11074 | 11428 | 12658 | 11657 | 10169 | 9398  | 9852  | 10187 | 9751  | 9645  | 10001    | Dnai1b6  |
| Dnai1b7  | 2     | 2     | 0     | 0     | 1     | 0     | 0     | 0     | 1     | 0     | 0     | 2     | 2     | 4     | 0     | 1     | 0     | 0     | 0     | 0     | 4     | 0     | 3     | 0     | 0     | 0     | 2     | 7        | Dnai1b7  |
| Dnai1b8  | 0     | 0     | 0     | 2     | 0     | 0     | 0     | 0     | 0     | 0     | 0     | 0     | 0     | 0     | 0     | 0     | 0     | 0     | 0     | 0     | 0     | 0     | 0     | 0     | 0     | 0     | 0     | 0        | Dnai1b8  |
| Dnai1b9  | 2465  | 2025  | 2524  | 2809  | 2532  | 2388  | 2848  | 2462  | 2079  | 2009  | 2221  | 1892  | 2124  | 2120  | 2515  | 2448  | 2513  | 2854  | 2516  | 2469  | 2981  | 2647  | 2350  | 2161  | 2276  | 2090  | 1952  | 2191     | Dnai1b9  |
| Dnai1c   | 6308  | 5821  | 4209  | 4706  | 4279  | 4874  | 5027  | 3881  | 3510  | 2881  | 3598  | 3509  | 3612  | 3866  | 6054  | 5374  | 3987  | 4559  | 4217  | 5263  | 5045  | 2837  | 3456  | 3134  | 3362  | 3350  | 3681  | 3756     | Dnai1c   |
| Dnai1c10 | 13393 | 11245 | 11112 | 8767  | 8678  | 9731  | 9470  | 10153 | 9606  | 7864  | 8615  | 9086  | 9737  | 9250  | 13740 | 12728 | 9094  | 9185  | 8480  | 11210 | 8815  | 8363  | 9784  | 7710  | 7895  | 8945  | 9840  | 9133     | Dnai1c10 |
| Dnai1c11 | 6345  | 7192  | 7398  | 7055  | 6397  | 6256  | 6529  | 6128  | 6247  | 6694  | 6421  | 7459  | 6890  | 7824  | 6117  | 6200  | 7097  | 6092  | 6782  | 6701  | 6519  | 6137  | 5803  | 7380  | 7122  | 7584  | 7513  | 7973     | Dnai1c11 |
| Dnai1c12 |       |       |       |       |       |       |       |       |       |       |       |       |       |       |       |       |       |       |       |       |       |       |       |       |       |       |       |          |          |

|          |       |       |       |       |       |       |       |       |       |       |       |       |       |       |       |       |       |       |       |       |       |       |       |       |       |       |       |       |          |
|----------|-------|-------|-------|-------|-------|-------|-------|-------|-------|-------|-------|-------|-------|-------|-------|-------|-------|-------|-------|-------|-------|-------|-------|-------|-------|-------|-------|-------|----------|
| Dnase1I2 | 261   | 574   | 563   | 682   | 699   | 585   | 577   | 424   | 466   | 561   | 624   | 463   | 488   | 437   | 336   | 479   | 696   | 726   | 793   | 498   | 654   | 650   | 437   | 583   | 661   | 413   | 471   | 471   | Dnase1I2 |
| Dnase1I3 | 7     | 6     | 0     | 1     | 2     | 5     | 2     | 6     | 9     | 17    | 6     | 10    | 6     | 4     | 9     | 10    | 2     | 8     | 4     | 2     | 1     | 10    | 19    | 10    | 15    | 8     | 12    | 6     | Dnase1I3 |
| Dnase2a  | 2205  | 2331  | 2393  | 2139  | 1581  | 1680  | 1837  | 587   | 756   | 649   | 746   | 745   | 754   | 698   | 1701  | 2165  | 2261  | 2134  | 1880  | 1593  | 1784  | 518   | 723   | 878   | 553   | 1045  | 718   | 730   | Dnase2a  |
| Dnase2b  | 0     | 1     | 0     | 0     | 0     | 3     | 0     | 0     | 0     | 0     | 4     | 0     | 0     | 0     | 1     | 2     | 0     | 0     | 2     | 0     | 4     | 0     | 0     | 2     | 0     | 0     | 0     | 0     | Dnase2b  |
| Dnd1     | 140   | 230   | 232   | 237   | 190   | 164   | 146   | 120   | 126   | 197   | 174   | 140   | 135   | 173   | 131   | 158   | 180   | 213   | 172   | 156   | 167   | 172   | 138   | 191   | 203   | 214   | 153   | 170   | Dnd1     |
| Dner     | 3893  | 4565  | 4234  | 8803  | 13845 | 9536  | 10781 | 8120  | 8727  | 10648 | 9847  | 7449  | 7035  | 7503  | 5354  | 3903  | 7429  | 10222 | 10948 | 8478  | 11015 | 14253 | 8903  | 8054  | 11984 | 5722  | 5683  | 6590  | Dner     |
| Dnhd1    | 1473  | 1932  | 982   | 1781  | 1573  | 1698  | 1656  | 666   | 686   | 660   | 653   | 550   | 582   | 521   | 1489  | 1769  | 1426  | 1966  | 1432  | 1489  | 1881  | 663   | 617   | 427   | 691   | 224   | 511   | 428   | Dnhd1    |
| Dnlz     | 1437  | 1671  | 1571  | 1305  | 1457  | 1512  | 1361  | 2363  | 2477  | 2662  | 2184  | 2746  | 2663  | 2618  | 1410  | 1318  | 1562  | 1318  | 1602  | 1472  | 1408  | 2055  | 2460  | 2697  | 2527  | 3265  | 2960  | 2627  | Dnlz     |
| Dnm1     | 4976  | 5168  | 5522  | 7120  | 8607  | 7105  | 5791  | 5635  | 7464  | 9457  | 9527  | 6543  | 6615  | 5584  | 4516  | 5831  | 6576  | 7801  | 7868  | 5172  | 6731  | 10190 | 6840  | 8027  | 8530  | 5389  | 5381  | 5105  | Dnm1     |
| Dnm1I    | 14693 | 11710 | 12420 | 12910 | 16312 | 15876 | 16810 | 19267 | 16397 | 17012 | 16339 | 17136 | 16389 | 17536 | 15314 | 12636 | 13050 | 13230 | 14774 | 16172 | 16000 | 18198 | 16311 | 15416 | 17230 | 14734 | 16708 | 16813 | Dnm1I    |
| Dnm2     | 9401  | 11606 | 10955 | 12564 | 10809 | 10611 | 10522 | 5083  | 5792  | 6481  | 6014  | 6429  | 5801  | 6074  | 9376  | 10344 | 11748 | 12404 | 11501 | 8452  | 10812 | 6450  | 5783  | 6432  | 6689  | 6352  | 5507  | 5791  | Dnm2     |
| Dnm3     | 2712  | 2834  | 1866  | 4458  | 8010  | 6447  | 6378  | 4863  | 5043  | 5702  | 5378  | 3252  | 4018  | 3260  | 3455  | 3100  | 3417  | 5650  | 5710  | 5299  | 6811  | 7229  | 4751  | 3551  | 5810  | 1646  | 2793  | 2639  | Dnm3     |
| Dnmbp    | 2314  | 2771  | 2689  | 2362  | 1887  | 2074  | 1825  | 1778  | 2292  | 2175  | 2430  | 2463  | 2426  | 2357  | 2294  | 2769  | 2592  | 2384  | 2085  | 1781  | 1839  | 1988  | 2396  | 2317  | 1978  | 2522  | 2325  | 2322  | Dnmbp    |
| Dnmt1    | 20788 | 21801 | 21711 | 20576 | 18681 | 20002 | 19801 | 15850 | 19207 | 20003 | 18594 | 25149 | 21244 | 22980 | 18296 | 20221 | 21797 | 20007 | 21446 | 18482 | 19538 | 16827 | 16508 | 21727 | 20726 | 22936 | 22896 | 23169 | Dnmt1    |
| Dnmt3a   | 8589  | 8314  | 9868  | 9686  | 12317 | 10937 | 10184 | 18733 | 21136 | 23035 | 24500 | 22724 | 23181 | 22174 | 8225  | 8989  | 10754 | 10407 | 11985 | 9123  | 10460 | 20591 | 20300 | 23249 | 22411 | 11854 | 21066 | 21192 | Dnmt3a   |
| Dnmt3b   | 2271  | 2341  | 2348  | 1515  | 1294  | 1561  | 1482  | 768   | 873   | 725   | 848   | 971   | 1035  | 1017  | 1982  | 2579  | 1815  | 1624  | 1372  | 1406  | 1467  | 593   | 794   | 842   | 753   | 1108  | 1145  | 1060  | Dnmt3b   |
| Dnmt3c   | 7     | 4     | 2     | 1     | 1     | 1     | 3     | 2     | 5     | 14    | 5     | 11    | 9     | 11    | 7     | 4     | 0     | 0     | 1     | 4     | 1     | 0     | 13    | 6     | 7     | 6     | 13    | 6     | Dnmt3c   |
| Dnmt3I   | 0     | 0     | 3     | 0     | 0     | 0     | 0     | 1     | 0     | 3     | 0     | 0     | 0     | 1     | 0     | 0     | 0     | 0     | 1     | 0     | 0     | 0     | 1     | 2     | 3     | 2     | 0     | 0     | Dnmt3I   |
| Dnpep    | 6293  | 8274  | 6971  | 6475  | 6282  | 6052  | 5773  | 3916  | 4328  | 4296  | 3852  | 4369  | 4427  | 4388  | 6237  | 6804  | 7073  | 6000  | 6733  | 6246  | 5756  | 4142  | 4419  | 4207  | 4281  | 4927  | 4903  | 4587  | Dnpep    |
| Dnph1    | 1467  | 1479  | 1552  | 1237  | 823   | 865   | 1083  | 9512  | 851   | 851   | 741   | 1357  | 1124  | 1409  | 1278  | 1219  | 1494  | 1022  | 1064  | 1111  | 987   | 702   | 847   | 1186  | 1018  | 1612  | 1335  | 1576  | Dnph1    |
| Dntt     | 0     | 3     | 0     | 7     | 5     | 2     | 2     | 1     | 2     | 3     | 2     | 8     | 8     | 1     | 3     | 7     | 0     | 2     | 0     | 9     | 2     | 7     | 8     | 3     | 5     | 0     | 3     | 9     | Dntt     |
| Dntip1   | 1844  | 2275  | 2276  | 2296  | 1906  | 1874  | 2190  | 1896  | 2138  | 2162  | 2084  | 2371  | 2188  | 2480  | 1791  | 1907  | 2313  | 2103  | 2046  | 1886  | 2069  | 2000  | 2040  | 2363  | 2266  | 2556  | 2461  | 2614  | Dntip1   |
| Dntip2   | 5906  | 5426  | 5595  | 4473  | 3921  | 4204  | 4706  | 5576  | 4779  | 4272  | 4405  | 5324  | 4955  | 5545  | 5987  | 5322  | 5161  | 4569  | 4210  | 5268  | 4276  | 4466  | 4827  | 5015  | 4521  | 5842  | 5298  | 5619  | Dntip2   |
| Doc2a    | 392   | 523   | 677   | 490   | 529   | 509   | 495   | 249   | 284   | 357   | 241   | 354   | 256   | 328   | 404   | 344   | 601   | 388   | 599   | 515   | 517   | 287   | 263   | 270   | 296   | 396   | 315   | 335   | Doc2a    |
| Doc2b    | 484   | 409   | 490   | 617   | 1064  | 679   | 845   | 708   | 903   | 956   | 838   | 398   | 373   | 353   | 398   | 425   | 622   | 774   | 860   | 656   | 852   | 1004  | 873   | 724   | 769   | 506   | 313   | 301   | Doc2b    |
| Doc2g    | 122   | 143   | 161   | 197   | 245   | 145   | 228   | 137   | 161   | 248   | 188   | 209   | 191   | 208   | 108   | 154   | 182   | 218   | 263   | 198   | 206   | 226   | 162   | 278   | 270   | 242   | 180   | 179   | Doc2g    |
| Dock1    | 4609  | 3781  | 3683  | 2941  | 2563  | 3361  | 2713  | 4290  | 5306  | 4634  | 6069  | 4947  | 5558  | 4503  | 4063  | 5438  | 3007  | 3176  | 2561  | 2383  | 2404  | 4050  | 5727  | 4503  | 3827  | 4391  | 4686  | 4664  | Dock1    |
| Dock10   | 1502  | 1125  | 724   | 746   | 1126  | 1035  | 821   | 1413  | 1561  | 1072  | 1429  | 775   | 1044  | 699   | 1580  | 1629  | 746   | 892   | 736   | 951   | 820   | 1116  | 1463  | 809   | 831   | 657   | 893   | 687   | Dock10   |
| Dock11   | 5502  | 4196  | 3587  | 3611  | 4304  | 5007  | 4769  | 8109  | 6959  | 5866  | 6476  | 6827  | 5912  | 6806  | 5076  | 4692  | 3619  | 3557  | 4011  | 4826  | 4578  | 6007  | 6851  | 5620  | 6183  | 4907  | 6771  | 6252  | Dock11   |
| Dock2    | 168   | 187   | 143   | 149   | 128   | 196   | 108   | 194   | 203   | 146   | 270   | 136   | 174   | 149   | 215   | 210   | 94    | 163   | 122   | 161   | 130   | 179   | 280   | 120   | 145   | 99    | 146   | 132   | Dock2    |
| Dock3    | 1967  | 1968  | 1752  | 3270  | 5159  | 4608  | 4577  | 3968  | 4170  | 4715  | 3932  | 4236  | 3435  | 4239  | 2262  | 1699  | 2489  | 3650  | 4259  | 3863  | 4824  | 5309  | 3555  | 3867  | 5743  | 2392  | 3661  | 3559  | Dock3    |
| Dock4    | 4568  | 4050  | 2712  | 4304  | 5902  | 5826  | 5694  | 6449  | 5504  | 5367  | 5889  | 4474  | 4643  | 4911  | 4784  | 4541  | 3314  | 4929  | 4898  | 5169  | 5816  | 6126  | 5260  | 4538  | 6054  | 2717  | 4546  | 4330  | Dock4    |
| Dock5    | 1082  | 1063  | 1080  | 750   | 873   | 882   | 591   | 1231  | 1338  | 1136  | 1338  | 1437  | 1921  | 1391  | 1063  | 1401  | 831   | 902   | 577   | 663   | 659   | 1305  | 1646  | 1153  | 1116  | 905   | 2028  | 1529  | Dock5    |
| Dock6    | 4806  | 6439  | 7405  | 5649  | 4761  | 4339  | 3595  | 2583  | 3452  | 3704  | 4709  | 4300  | 4632  | 3526  | 4295  | 7391  | 6054  | 5798  | 4576  | 3594  | 3822  | 3795  | 4121  | 3863  | 3613  | 4104  | 4256  | 3710  | Dock6    |
| Dock7    | 23032 | 21114 | 15923 | 18653 | 20848 | 23304 | 22801 | 24569 | 22022 | 19675 | 19823 | 23284 | 21152 | 22356 | 23492 | 20724 | 18032 | 18351 | 19886 | 22559 | 22299 | 21497 | 21507 | 18623 | 22653 | 15843 | 22798 | 20874 | Dock7    |
| Dock8    | 223   | 207   | 159   | 118   | 105   | 182   | 68    | 335   | 470   | 325   | 507   | 288   | 279   | 196   | 191   | 251   | 95    | 118   | 117   | 114   | 97    | 199   | 605   | 362   | 198   | 139   | 289   | 252   | Dock8    |
| Dock9    | 3082  | 2999  | 1917  | 2298  | 3040  | 2767  | 2618  | 2676  | 3035  | 2650  | 2948  | 2156  | 2425  | 1874  | 2672  | 3305  | 2130  | 2580  | 2570  | 2751  | 2820  | 2695  | 3708  | 1772  | 2639  | 1259  | 2022  | 1620  | Dock9    |
| Dohh     | 286   | 370   | 299   | 367   | 259   | 188   | 239   | 233   | 221   | 247   | 204   | 204   | 215   | 274   | 262   | 217   | 316   | 310   | 264   | 270   | 267   | 189   | 232   | 267   | 227   | 225   | 244   | 236   | Dohh     |
| Dok1     | 520   | 688   | 711   | 529   | 443   | 499   | 416   | 208   | 324   | 284   | 343   | 300   | 361   | 283   | 501   | 628   | 664   | 536   | 481   | 462   | 473   | 206   | 397   | 288   | 268   | 473   | 361   | 309   | Dok1     |
| Dok2     | 152   | 133   | 143   | 129   | 131   | 116   | 123   | 236   | 308   | 232   | 388   | 263   | 315   | 229   | 117   | 159   | 184   | 123   | 127   | 123   | 123   | 264   | 337   | 311   | 247   | 289   | 281   | 202   | Dok2     |
| Dok3     | 769   | 1261  | 1249  | 1441  | 1532  | 1191  | 1155  | 536   | 588   | 772   | 645   | 667   | 624   | 627   | 764   | 1095  | 1415  | 1554  | 1380  | 1146  | 1227  | 862   | 531   | 746   | 765   | 687   | 585   | 579   | Dok3     |
| Dok4     | 2562  | 3363  | 2664  | 3712  | 4474  | 3859  | 3643  | 2949  | 3435  | 3372  | 3145  | 2500  | 2633  | 2336  | 2858  | 3197  | 3169  | 3927  | 4062  | 4104  | 3910  | 3773  | 3242  | 3115  | 3659  | 2423  | 2309  | 2191  | Dok4     |
| Dok5     | 622   | 745   | 840   | 1087  | 1614  | 1158  | 1314  | 999   | 920   | 1097  | 1208  | 830   | 981   | 880   | 795   | 701   | 957   | 1264  | 1407  | 1223  | 1490  | 1151  | 1016  | 953   | 1166  | 539   | 790   | 952   | Dok5     |
| Dok6     | 792   | 579   | 603   | 1067  | 2113  | 1697  | 1934  | 2513  | 2199  | 2203  | 2045  | 1604  | 1560  | 1790  | 986   | 732   | 744   | 1237  | 1415  | 1873  | 2000  | 2709  | 1957  | 1662  | 2639  | 1021  | 1485  | 1461  | Dok6     |
| Dok7     | 122   | 162   | 140   | 203   | 322   | 215   | 192   | 128   | 198   | 152   | 389   | 103   | 96    | 76    | 124   | 139   | 158   | 274   | 241   | 209   | 213   | 241   | 263   | 141   | 184   | 68    | 88    | 44    | Dok7     |
| Dolk     | 1225  | 1513  | 1177  | 1353  | 1114  | 1023  | 938   | 801   | 961   | 879   | 1065  | 944   | 906   | 899   | 1121  | 1358  | 1114  | 1296  | 984   | 1073  | 1045  | 887   | 973   | 890   | 1019  | 895   | 927   | 978   | Dolk     |
| Dolpp1   | 1888  | 2503  | 2227  | 2363  | 2008  | 2130  | 2034  | 1721  | 1955  | 1842  | 1852  | 2134  | 2068  | 2070  | 1809  | 1953  | 2380  | 2242  | 2297  | 2184  | 2065  | 1958  | 1820  | 2135  | 2191  | 2295  | 2388  | 2060  | Dolpp1   |
| Donson   | 3178  | 2729  | 2887  | 2900  | 2749  | 2946  | 3242  | 2470  | 2015  | 2318  | 2177  | 2349  | 2346  | 2493  | 3109  | 2812  | 2968  | 3136  | 2895  | 2969  | 2940  | 2446  | 1874  | 2356  | 2296  | 2708  | 2520  | 2584  | Donson   |



|          |       |       |       |       |       |       |       |       |       |       |       |       |       |       |       |       |       |       |       |       |       |       |       |       |       |       |       |        |          |
|----------|-------|-------|-------|-------|-------|-------|-------|-------|-------|-------|-------|-------|-------|-------|-------|-------|-------|-------|-------|-------|-------|-------|-------|-------|-------|-------|-------|--------|----------|
| Dusp10   | 923   | 1012  | 1035  | 938   | 752   | 765   | 864   | 519   | 647   | 589   | 626   | 645   | 625   | 631   | 964   | 856   | 1078  | 869   | 715   | 815   | 807   | 419   | 646   | 712   | 501   | 708   | 721   | 657    | Dusp10   |
| Dusp11   | 12169 | 10826 | 10534 | 12176 | 13439 | 12588 | 13727 | 15115 | 13855 | 14444 | 15229 | 13012 | 13183 | 13106 | 11966 | 11189 | 11728 | 13417 | 12783 | 12764 | 13589 | 17049 | 13718 | 14183 | 15026 | 10434 | 12464 | 13416  | Dusp11   |
| Dusp12   | 1668  | 1522  | 1467  | 1659  | 1781  | 1775  | 1649  | 1811  | 1693  | 1747  | 1949  | 1725  | 1792  | 1675  | 1565  | 1558  | 1630  | 1812  | 1650  | 1664  | 1638  | 2060  | 1810  | 1909  | 1838  | 1798  | 1758  | 1646   | Dusp12   |
| Dusp13   | 6     | 5     | 2     | 0     | 1     | 3     | 2     | 1     | 5     | 2     | 7     | 3     | 2     | 1     | 3     | 3     | 3     | 3     | 2     | 0     | 6     | 2     | 10    | 2     | 0     | 2     | 0     | 1      | Dusp13   |
| Dusp14   | 683   | 731   | 508   | 707   | 709   | 657   | 799   | 372   | 444   | 322   | 300   | 340   | 287   | 366   | 613   | 646   | 744   | 686   | 711   | 726   | 860   | 231   | 400   | 453   | 357   | 407   | 286   | 325    | Dusp14   |
| Dusp15   | 384   | 539   | 478   | 621   | 988   | 666   | 761   | 302   | 337   | 420   | 372   | 237   | 276   | 221   | 462   | 549   | 599   | 845   | 771   | 645   | 794   | 510   | 315   | 266   | 413   | 160   | 208   | 220    | Dusp15   |
| Dusp16   | 4257  | 3728  | 4232  | 3647  | 3141  | 3338  | 3833  | 3268  | 3105  | 2959  | 3031  | 3887  | 3318  | 4031  | 3889  | 3439  | 3962  | 3625  | 3698  | 3152  | 3555  | 2294  | 2911  | 3292  | 3161  | 3949  | 4086  | 4005   | Dusp16   |
| Dusp18   | 2205  | 2141  | 2376  | 2667  | 2973  | 2843  | 2910  | 2425  | 2529  | 2715  | 2485  | 3313  | 2942  | 3051  | 2333  | 2188  | 2642  | 2541  | 2957  | 2596  | 2690  | 3282  | 2479  | 2819  | 3296  | 2892  | 2984  | 2968   | Dusp18   |
| Dusp19   | 606   | 541   | 649   | 641   | 731   | 678   | 749   | 775   | 750   | 770   | 835   | 808   | 763   | 775   | 687   | 670   | 651   | 683   | 645   | 696   | 761   | 747   | 779   | 771   | 764   | 608   | 753   | 787    | Dusp19   |
| Dusp2    | 111   | 101   | 104   | 95    | 118   | 98    | 98    | 89    | 79    | 130   | 119   | 92    | 121   | 102   | 95    | 129   | 127   | 72    | 113   | 111   | 102   | 119   | 110   | 110   | 96    | 121   | 112   | 81     | Dusp2    |
| Dusp22   | 923   | 818   | 956   | 891   | 1046  | 921   | 838   | 1189  | 1322  | 1374  | 1373  | 1208  | 1353  | 1141  | 1011  | 1022  | 934   | 993   | 946   | 827   | 867   | 1412  | 1432  | 1183  | 1165  | 1147  | 966   | 1208   | Dusp22   |
| Dusp23   | 400   | 514   | 504   | 509   | 538   | 498   | 430   | 184   | 292   | 258   | 267   | 191   | 243   | 212   | 425   | 500   | 583   | 518   | 535   | 436   | 444   | 197   | 285   | 224   | 190   | 270   | 253   | 209    | Dusp23   |
| Dusp26   | 1344  | 1944  | 1666  | 1968  | 2464  | 2085  | 2019  | 2282  | 1963  | 2390  | 1940  | 1748  | 1867  | 1564  | 1840  | 1408  | 2062  | 1794  | 2406  | 2259  | 2097  | 2951  | 1950  | 2599  | 1415  | 1671  | 1545  | Dusp26 |          |
| Dusp27   | 167   | 199   | 258   | 106   | 104   | 103   | 64    | 199   | 247   | 258   | 593   | 278   | 376   | 276   | 189   | 231   | 137   | 105   | 119   | 79    | 79    | 349   | 471   | 261   | 264   | 347   | 403   | 286    | Dusp27   |
| Dusp28   | 529   | 696   | 470   | 530   | 484   | 574   | 577   | 414   | 383   | 280   | 295   | 391   | 387   | 399   | 518   | 533   | 535   | 472   | 563   | 621   | 550   | 297   | 366   | 342   | 388   | 373   | 423   | 425    | Dusp28   |
| Dusp3    | 956   | 988   | 1006  | 990   | 1105  | 1091  | 921   | 1235  | 1314  | 1237  | 1704  | 1239  | 1232  | 1157  | 980   | 1074  | 1007  | 906   | 1100  | 956   | 988   | 1327  | 1553  | 1173  | 1263  | 1243  | 1190  | 1243   | Dusp3    |
| Dusp4    | 3557  | 4064  | 3781  | 6865  | 8486  | 6962  | 7359  | 7835  | 7841  | 9126  | 7032  | 9355  | 7841  | 8573  | 4257  | 3227  | 5779  | 6771  | 8709  | 7376  | 7325  | 8864  | 6364  | 8908  | 10724 | 7844  | 7392  | 7781   | Dusp4    |
| Dusp5    | 408   | 434   | 347   | 316   | 223   | 245   | 254   | 101   | 88    | 115   | 122   | 87    | 103   | 89    | 327   | 453   | 311   | 265   | 228   | 248   | 233   | 110   | 122   | 102   | 85    | 177   | 113   | 75     | Dusp5    |
| Dusp6    | 3443  | 2153  | 2258  | 1939  | 1627  | 1590  | 1735  | 2387  | 2585  | 1870  | 2544  | 1975  | 1960  | 2058  | 2552  | 2820  | 1780  | 1644  | 1580  | 1813  | 1625  | 1913  | 2530  | 2003  | 1695  | 3108  | 1651  | 2150   | Dusp6    |
| Dusp7    | 2051  | 2560  | 2521  | 2243  | 1767  | 1927  | 1669  | 2109  | 2525  | 2449  | 2514  | 2027  | 2394  | 1931  | 1829  | 2575  | 2245  | 2281  | 1990  | 1582  | 1637  | 1970  | 2531  | 2314  | 1854  | 2988  | 1933  | 2115   | Dusp7    |
| Dusp8    | 3255  | 4306  | 4542  | 6979  | 8610  | 6536  | 6658  | 4998  | 5550  | 7298  | 5869  | 5991  | 4033  | 5760  | 3824  | 3266  | 6696  | 7339  | 7977  | 5781  | 7366  | 7787  | 4967  | 6803  | 7767  | 5764  | 4613  | 4953   | Dusp8    |
| Dusp9    | 896   | 758   | 844   | 441   | 326   | 458   | 303   | 299   | 435   | 223   | 364   | 295   | 449   | 291   | 636   | 784   | 546   | 401   | 407   | 265   | 280   | 147   | 406   | 364   | 178   | 591   | 309   | 345    | Dusp9    |
| Dut      | 5777  | 5149  | 6463  | 5521  | 4599  | 4704  | 6046  | 4358  | 3724  | 4285  | 4112  | 5828  | 4927  | 6838  | 5091  | 4326  | 5718  | 5051  | 5274  | 5175  | 5342  | 3397  | 3403  | 5810  | 4612  | 7830  | 6250  | 6843   | Dut      |
| Duxb1    | 100   | 62    | 119   | 71    | 71    | 69    | 117   | 330   | 207   | 291   | 258   | 335   | 400   | 438   | 82    | 49    | 81    | 55    | 104   | 77    | 71    | 291   | 247   | 261   | 295   | 226   | 492   | 401    | Duxb1    |
| Dv1      | 5277  | 7093  | 6957  | 7466  | 7373  | 6397  | 6120  | 4491  | 4643  | 5298  | 4954  | 5256  | 4450  | 4368  | 5138  | 5825  | 7646  | 7495  | 7845  | 6226  | 6309  | 5406  | 4495  | 5446  | 5735  | 5121  | 4699  | 4357   | Dv1      |
| Dv2      | 4383  | 5136  | 5882  | 6056  | 4380  | 4561  | 4088  | 2775  | 3168  | 3551  | 3423  | 3751  | 3435  | 3529  | 3827  | 4876  | 5839  | 5675  | 4970  | 3676  | 4329  | 2984  | 3134  | 3769  | 3432  | 4481  | 3430  | 3356   | Dv2      |
| Dv3      | 7441  | 7965  | 9990  | 10900 | 11632 | 10113 | 9764  | 7834  | 8149  | 10797 | 10239 | 12744 | 10749 | 11850 | 7096  | 7844  | 11127 | 10496 | 11173 | 7904  | 10384 | 12195 | 7580  | 11408 | 11462 | 11160 | 10721 | 11155  | Dv3      |
| Dxo      | 1649  | 2343  | 1987  | 2073  | 1611  | 1541  | 1845  | 1207  | 1378  | 1564  | 1402  | 1632  | 1427  | 1673  | 1548  | 1787  | 1955  | 1867  | 1891  | 1351  | 1692  | 1350  | 1306  | 1593  | 1558  | 1847  | 1528  | 1771   | Dxo      |
| Dydc1    | 1     | 3     | 7     | 5     | 2     | 18    | 8     | 0     | 7     | 1     | 3     | 10    | 9     | 1     | 5     | 10    | 2     | 2     | 6     | 4     | 3     | 2     | 13    | 1     | 4     | 0     | 7     | 7      | Dydc1    |
| Dydc2    | 7     | 7     | 12    | 3     | 16    | 10    | 7     | 26    | 11    | 18    | 10    | 10    | 23    | 10    | 9     | 12    | 10    | 9     | 8     | 8     | 9     | 22    | 23    | 10    | 22    | 8     | 16    | 8      | Dydc2    |
| Dym      | 2264  | 2151  | 2380  | 2183  | 2118  | 1893  | 2048  | 1579  | 1610  | 1881  | 1549  | 1808  | 1631  | 1672  | 2076  | 2116  | 2218  | 2118  | 2196  | 1783  | 2046  | 1828  | 1614  | 1816  | 1796  | 1865  | 1610  | 1805   | Dym      |
| Dynap    | 0     | 0     | 0     | 0     | 0     | 0     | 0     | 0     | 0     | 0     | 0     | 0     | 0     | 0     | 0     | 0     | 0     | 0     | 0     | 0     | 0     | 0     | 0     | 0     | 0     | 0     | 0     | 0      | Dynap    |
| Dync1h1  | 65891 | 74007 | 38100 | 63699 | 76399 | 88253 | 72032 | 58231 | 68392 | 69618 | 64663 | 64690 | 67375 | 63541 | 66756 | 72172 | 47298 | 64605 | 70381 | 69403 | 92290 | 53765 | 57961 | 45541 | 80511 | 33151 | 73849 | 54894  | Dync1h1  |
| Dync1i2  | 226   | 242   | 137   | 293   | 502   | 437   | 518   | 339   | 501   | 409   | 529   | 240   | 172   | 209   | 255   | 252   | 218   | 415   | 428   | 453   | 552   | 409   | 445   | 326   | 410   | 193   | 138   | 150    | Dync1i2  |
| Dync1i1  | 22283 | 21143 | 19518 | 20747 | 22803 | 21883 | 26176 | 27191 | 24070 | 23829 | 21937 | 23538 | 21691 | 25209 | 25168 | 20651 | 21903 | 21552 | 22559 | 25578 | 24592 | 26664 | 23049 | 23317 | 24761 | 23244 | 22910 | 23524  | Dync1i1  |
| Dync1i11 | 6689  | 6791  | 7538  | 8098  | 8430  | 7490  | 8796  | 8048  | 6839  | 7904  | 7678  | 8150  | 7778  | 9499  | 6957  | 6564  | 7859  | 7888  | 8314  | 7407  | 8316  | 9052  | 6928  | 8401  | 9239  | 8027  | 7603  | 9380   | Dync1i11 |
| Dync1i12 | 14173 | 13318 | 14647 | 15283 | 15934 | 15487 | 15356 | 18280 | 16094 | 17922 | 16780 | 18914 | 17438 | 19554 | 15072 | 13740 | 14916 | 15559 | 15252 | 16172 | 15169 | 18802 | 15742 | 17925 | 19784 | 18078 | 18923 | 18162  | Dync1i12 |
| Dync2h1  | 9370  | 8406  | 3723  | 4826  | 4631  | 6541  | 6415  | 8619  | 7172  | 4076  | 4643  | 5381  | 5410  | 5423  | 9124  | 8463  | 3950  | 4215  | 4318  | 9460  | 6680  | 3783  | 6649  | 3471  | 4834  | 3348  | 6746  | 4894   | Dync2h1  |
| Dync2i1  | 1941  | 1729  | 1671  | 1940  | 1912  | 2011  | 1947  | 2249  | 2250  | 2481  | 2489  | 2096  | 2150  | 2160  | 1891  | 1878  | 1860  | 1927  | 1800  | 1741  | 1801  | 2217  | 2236  | 2197  | 2033  | 1850  | 1970  | 2006   | Dync2i1  |
| Dync2i2  | 1392  | 1728  | 1322  | 1710  | 1836  | 1679  | 1614  | 1597  | 1898  | 1774  | 1855  | 1642  | 1669  | 1588  | 1226  | 1490  | 1611  | 1862  | 1816  | 1810  | 1726  | 1820  | 1989  | 1956  | 1983  | 1918  | 1574  | 1685   | Dync2i2  |
| Dync2i11 | 1112  | 1214  | 936   | 990   | 911   | 1064  | 1100  | 1276  | 1280  | 1123  | 1186  | 1250  | 1235  | 1338  | 1166  | 1220  | 998   | 941   | 977   | 1174  | 989   | 1091  | 1337  | 1231  | 1126  | 1362  | 1238  | 1345   | Dync2i11 |
| Dynl1    | 21389 | 24844 | 22469 | 22293 | 17840 | 16891 | 22598 | 15389 | 13560 | 13955 | 13911 | 13425 | 14326 | 16860 | 22158 | 19094 | 23409 | 20303 | 21094 | 22069 | 22550 | 13349 | 13761 | 15944 | 14859 | 16391 | 15325 | 17440  | Dynl1    |
| Dynl2    | 34537 | 36817 | 54137 | 66301 | 54645 | 42159 | 48912 | 27672 | 23236 | 38125 | 33490 | 34273 | 30531 | 37139 | 35711 | 31531 | 61754 | 60111 | 54727 | 40142 | 54593 | 36001 | 22703 | 41725 | 42936 | 37930 | 31571 | 36590  | Dynl2    |
| Dynlrb1  | 6191  | 6815  | 6042  | 6906  | 7022  | 6869  | 7329  | 7167  | 6989  | 7347  | 6437  | 6574  | 6501  | 7093  | 6733  | 6001  | 7006  | 6872  | 7915  | 8998  | 7655  | 6612  | 7172  | 7170  | 7262  | 7600  | 7204  | 7296   | Dynlrb1  |
| Dynlrb2  | 65    | 101   | 42    | 41    | 85    | 80    | 96    | 100   | 114   | 84    | 54    | 97    | 134   | 88    | 115   | 106   | 61    | 33    | 76    | 133   | 85    | 132   | 189   | 90    | 114   | 109   | 72    | 69     | Dynlrb2  |
| Dynlt1a  | 1212  | 1220  | 944   | 1254  | 1673  | 1426  | 1430  | 1343  | 1316  | 1299  | 1141  | 1009  | 1264  | 1175  | 1298  | 1150  | 1170  | 1332  | 1498  | 1634  | 1385  | 1462  | 1289  | 1142  | 1390  | 1067  | 1223  | 1013   | Dynlt1a  |
| Dynlt1b  | 1442  | 937   | 871   | 978   | 1014  | 1395  | 1764  | 1826  | 2010  | 1135  | 1462  | 1554  | 1609  | 1225  | 1436  | 829   | 1103  | 1360  | 1061  | 1790  | 1148  | 1175  | 984   | 1636  | 1248  | 1503  | 1639  | 1150   | Dynlt1b  |
| Dynlt1c  | 745   | 733   | 572   | 751   | 847   | 803   | 829   | 948   | 903   | 824   | 8     |       |       |       |       |       |       |       |       |       |       |       |       |       |       |       |       |        |          |



|               |      |      |       |       |       |       |      |       |       |       |       |       |       |       |      |      |       |      |       |      |      |       |       |       |       |      |       |       |               |
|---------------|------|------|-------|-------|-------|-------|------|-------|-------|-------|-------|-------|-------|-------|------|------|-------|------|-------|------|------|-------|-------|-------|-------|------|-------|-------|---------------|
| E2f3          | 3988 | 3561 | 4307  | 3987  | 4240  | 4255  | 4573 | 3876  | 3835  | 4124  | 3963  | 5749  | 5113  | 5593  | 3745 | 3459 | 4323  | 4001 | 4729  | 3735 | 4252 | 3397  | 3377  | 4602  | 4273  | 5657 | 5260  | 5610  | E2f3          |
| E2f4          | 4270 | 5012 | 5882  | 4556  | 3332  | 3566  | 3455 | 2729  | 2055  | 3086  | 3098  | 4113  | 3674  | 3734  | 3658 | 4653 | 4794  | 4391 | 3929  | 3211 | 3489 | 3267  | 2995  | 3697  | 3349  | 4448 | 3798  | 3904  | E2f4          |
| E2f5          | 2872 | 2393 | 2811  | 2446  | 1963  | 2197  | 2709 | 2737  | 3300  | 1932  | 1971  | 2856  | 2558  | 3044  | 3062 | 2655 | 2633  | 2224 | 2077  | 2496 | 2298 | 2353  | 2213  | 2319  | 2062  | 3265 | 2920  | 3260  | E2f5          |
| E2f6          | 7216 | 7457 | 7604  | 6181  | 5332  | 5563  | 6110 | 5804  | 5202  | 4867  | 4837  | 6179  | 5768  | 5842  | 6937 | 7233 | 7011  | 5795 | 5677  | 6214 | 5608 | 5110  | 5036  | 5343  | 5055  | 6665 | 6344  | 6611  | E2f6          |
| E2f7          | 3204 | 2923 | 3840  | 2834  | 2360  | 2541  | 2456 | 2192  | 2329  | 2344  | 2364  | 3982  | 3478  | 3896  | 2898 | 3767 | 3312  | 2697 | 2636  | 2287 | 2421 | 1962  | 2210  | 3121  | 2649  | 4041 | 3583  | 3939  | E2f7          |
| E2f8          | 1731 | 2046 | 2288  | 2005  | 1416  | 1442  | 1677 | 1417  | 1593  | 1614  | 1658  | 2625  | 1956  | 2428  | 1618 | 1712 | 2097  | 1811 | 1799  | 1420 | 1578 | 1198  | 1364  | 2153  | 1610  | 2882 | 2210  | 2248  | E2f8          |
| E330021D16RIK | 0    | 4    | 0     | 1     | 0     | 0     | 0    | 0     | 2     | 0     | 0     | 1     | 3     | 2     | 1    | 2    | 0     | 0    | 0     | 1    | 1    | 0     | 3     | 1     | 1     | 1    | 0     | 2     | E330021D16RIK |
| E430018J23RIK | 604  | 680  | 644   | 585   | 591   | 643   | 510  | 504   | 620   | 593   | 547   | 610   | 649   | 585   | 587  | 594  | 666   | 607  | 647   | 592  | 564  | 543   | 576   | 662   | 578   | 534  | 611   | 563   | E430018J23RIK |
| E4f1          | 1536 | 1887 | 2118  | 2565  | 2176  | 2180  | 1854 | 2109  | 2483  | 2791  | 2541  | 2738  | 2577  | 2562  | 1366 | 1632 | 2241  | 2403 | 2484  | 1919 | 1943 | 2535  | 2258  | 2848  | 2822  | 2698 | 2550  | 2415  | E4f1          |
| Eaf1          | 3766 | 3342 | 3522  | 3410  | 2752  | 3117  | 2938 | 3408  | 3110  | 3250  | 3442  | 3485  | 3402  | 3314  | 3458 | 3660 | 3416  | 3247 | 2857  | 2806 | 2881 | 3070  | 3136  | 3609  | 3006  | 3717 | 3399  | 3610  | Eaf1          |
| Eaf2          | 369  | 317  | 347   | 293   | 157   | 251   | 277  | 99    | 77    | 82    | 93    | 63    | 104   | 98    | 318  | 314  | 260   | 267  | 190   | 266  | 251  | 69    | 80    | 114   | 79    | 119  | 87    | 116   | Eaf2          |
| Eapp          | 2152 | 1903 | 2450  | 2356  | 2413  | 2212  | 2720 | 3759  | 3049  | 3540  | 3070  | 3446  | 3288  | 3613  | 2385 | 1849 | 2573  | 2332 | 2365  | 2580 | 2491 | 3522  | 3172  | 3590  | 3730  | 3574 | 3307  | 3624  | Eapp          |
| Ear10         | 0    | 0    | 0     | 0     | 2     | 0     | 0    | 0     | 0     | 0     | 5     | 7     | 0     | 2     | 0    | 0    | 1     | 1    | 0     | 0    | 1    | 2     | 1     | 2     | 0     | 3    | 0     | 1     | Ear10         |
| Ear1          | 0    | 0    | 0     | 0     | 0     | 0     | 0    | 0     | 0     | 0     | 0     | 0     | 2     | 0     | 0    | 0    | 0     | 0    | 0     | 0    | 0    | 0     | 0     | 0     | 0     | 0    | 0     | 0     | Ear1          |
| Ear2          | 0    | 1    | 2     | 4     | 0     | 0     | 0    | 0     | 0     | 0     | 0     | 0     | 1     | 1     | 0    | 2    | 0     | 0    | 0     | 0    | 0    | 0     | 1     | 2     | 0     | 4    | 0     | 4     | Ear2          |
| Ear6          | 2    | 0    | 4     | 0     | 0     | 0     | 0    | 0     | 0     | 0     | 5     | 0     | 0     | 0     | 0    | 2    | 0     | 0    | 0     | 0    | 0    | 1     | 0     | 0     | 2     | 0    | 5     | 0     | Ear6          |
| Ears2         | 1022 | 1153 | 782   | 902   | 900   | 925   | 959  | 1340  | 1333  | 1289  | 1249  | 1171  | 1376  | 1373  | 964  | 921  | 842   | 923  | 920   | 897  | 945  | 1051  | 1346  | 1231  | 1253  | 1046 | 1374  | 1428  | Ears2         |
| Ebag9         | 1857 | 1705 | 2500  | 1894  | 1906  | 1833  | 2001 | 1900  | 1714  | 1752  | 1716  | 2041  | 1990  | 2110  | 2099 | 1627 | 2085  | 1662 | 1867  | 2046 | 1939 | 1843  | 1741  | 1919  | 1743  | 2191 | 2200  | 2459  | Ebag9         |
| Ebf1          | 4065 | 4618 | 5290  | 6361  | 7482  | 6210  | 4644 | 8771  | 7860  | 9186  | 9651  | 6465  | 10602 | 6852  | 5958 | 6009 | 6414  | 6136 | 5743  | 4992 | 5372 | 11022 | 8459  | 6758  | 8647  | 5048 | 7208  | 7180  | Ebf1          |
| Ebf2          | 4024 | 4518 | 4262  | 5203  | 5033  | 4666  | 2697 | 5372  | 4867  | 5038  | 5666  | 4299  | 7655  | 3869  | 5515 | 5761 | 4955  | 4464 | 4003  | 4380 | 3414 | 6408  | 5583  | 4214  | 4568  | 3116 | 5058  | 4694  | Ebf2          |
| Ebf3          | 7211 | 7190 | 10543 | 11152 | 14292 | 11324 | 7043 | 15419 | 13388 | 19686 | 20498 | 13052 | 20637 | 13111 | 8910 | 9106 | 11276 | 9621 | 10442 | 8724 | 8883 | 23053 | 17429 | 13097 | 17680 | 6761 | 13990 | 15275 | Ebf3          |
| Ebf4          | 1458 | 1553 | 1495  | 1855  | 1767  | 1645  | 1481 | 1242  | 1352  | 1494  | 1372  | 1332  | 1176  | 1265  | 1221 | 1521 | 1705  | 1839 | 1723  | 1306 | 1524 | 1333  | 1152  | 1579  | 1384  | 1329 | 1260  | 1108  | Ebf4          |
| Efb3          | 92   | 106  | 125   | 104   | 128   | 112   | 118  | 85    | 65    | 93    | 76    | 66    | 100   | 69    | 94   | 56   | 123   | 89   | 90    | 91   | 114  | 82    | 100   | 80    | 95    | 47   | 95    | 82    | Efb3          |
| Ebna1bp2      | 5356 | 6195 | 5947  | 5463  | 5028  | 5264  | 5439 | 4989  | 4690  | 4603  | 4627  | 5462  | 4630  | 5426  | 5532 | 5281 | 5751  | 4971 | 5438  | 6028 | 5147 | 4157  | 4451  | 5447  | 5077  | 5783 | 5327  | 5371  | Ebna1bp2      |
| Ebp           | 914  | 993  | 791   | 850   | 834   | 773   | 898  | 985   | 882   | 821   | 802   | 827   | 897   | 863   | 882  | 894  | 846   | 776  | 859   | 976  | 749  | 769   | 938   | 723   | 769   | 951  | 815   | 877   | Ebp           |
| Ebpl          | 630  | 663  | 678   | 607   | 663   | 716   | 696  | 1116  | 1184  | 1130  | 1174  | 1203  | 1207  | 1282  | 629  | 623  | 590   | 583  | 595   | 664  | 614  | 1068  | 1131  | 1294  | 1235  | 1169 | 1311  | 1209  | Ebpl          |
| Ecd           | 1976 | 1902 | 1962  | 1602  | 1906  | 1851  | 1845 | 4136  | 3984  | 3986  | 3846  | 4593  | 4238  | 4555  | 1887 | 1659 | 1780  | 1571 | 2018  | 1795 | 1737 | 3857  | 4103  | 4026  | 3991  | 4939 | 4551  | 4724  | Ecd           |
| Ece1          | 5203 | 5709 | 6485  | 5446  | 5091  | 5026  | 4364 | 2971  | 3690  | 3886  | 3808  | 3543  | 4085  | 3299  | 4655 | 6097 | 5707  | 5873 | 5208  | 4028 | 4443 | 3544  | 4007  | 3881  | 3010  | 4336 | 3361  | 3369  | Ece1          |
| Ece2          | 125  | 111  | 178   | 190   | 286   | 236   | 276  | 247   | 233   | 359   | 239   | 228   | 206   | 319   | 119  | 114  | 218   | 175  | 235   | 174  | 306  | 369   | 199   | 319   | 320   | 203  | 267   | 318   | Ece2          |
| Ecel1         | 723  | 964  | 592   | 1415  | 2030  | 1452  | 1657 | 1356  | 1749  | 1747  | 1504  | 1553  | 878   | 1486  | 920  | 668  | 1181  | 1548 | 1901  | 1272 | 1526 | 2217  | 1215  | 1722  | 1909  | 1618 | 1059  | 976   | Ecel1         |
| Ech1          | 1309 | 1341 | 1113  | 1015  | 1051  | 1060  | 932  | 1788  | 2319  | 1845  | 2189  | 1776  | 2004  | 1611  | 1269 | 1402 | 1001  | 1056 | 890   | 1183 | 940  | 1584  | 2590  | 1835  | 1783  | 1973 | 1707  | 1797  | Ech1          |
| Echdc1        | 1891 | 1635 | 1957  | 1425  | 1391  | 1464  | 1553 | 1922  | 1728  | 1531  | 1646  | 1853  | 1664  | 2018  | 2054 | 1828 | 1793  | 1484 | 1349  | 1802 | 1524 | 1556  | 1759  | 1677  | 1590  | 1932 | 1972  | 2235  | Echdc1        |
| Echdc2        | 565  | 483  | 527   | 402   | 472   | 422   | 371  | 535   | 721   | 583   | 724   | 554   | 599   | 475   | 444  | 568  | 418   | 464  | 360   | 395  | 319  | 478   | 753   | 637   | 525   | 573  | 506   | 483   | Echdc2        |
| Echdc3        | 58   | 55   | 53    | 21    | 16    | 32    | 19   | 61    | 66    | 58    | 65    | 67    | 77    | 85    | 30   | 33   | 29    | 19   | 25    | 16   | 24   | 70    | 89    | 54    | 41    | 59   | 92    | 70    | Echdc3        |
| Echs1         | 4730 | 4796 | 4287  | 3773  | 3599  | 4041  | 3698 | 5053  | 5069  | 4345  | 4490  | 5109  | 5135  | 5156  | 4360 | 4460 | 3899  | 3648 | 3823  | 4472 | 3655 | 4393  | 5178  | 4893  | 4570  | 5418 | 5476  | 5540  | Echs1         |
| Ec1           | 569  | 606  | 796   | 533   | 525   | 529   | 463  | 832   | 889   | 971   | 907   | 1050  | 979   | 990   | 510  | 555  | 623   | 538  | 569   | 474  | 442  | 810   | 959   | 1000  | 883   | 1176 | 1062  | 1157  | Ec1           |
| Ec2           | 5269 | 4729 | 4429  | 4040  | 4141  | 4292  | 4623 | 5201  | 5080  | 4342  | 4714  | 4751  | 4934  | 4885  | 5037 | 4719 | 4029  | 4028 | 4288  | 5235 | 4383 | 4333  | 5510  | 4392  | 4410  | 5134 | 4997  | 5098  | Ec2           |
| Ec3           | 25   | 31   | 26    | 10    | 31    | 33    | 8    | 12    | 33    | 27    | 38    | 11    | 52    | 12    | 30   | 33   | 15    | 29   | 19    | 20   | 10   | 25    | 56    | 21    | 30    | 18   | 7     | 19    | Ec3           |
| Ecm1          | 361  | 480  | 628   | 511   | 524   | 433   | 454  | 416   | 470   | 620   | 545   | 673   | 672   | 659   | 359  | 401  | 639   | 535  | 586   | 392  | 507  | 732   | 482   | 721   | 618   | 833  | 608   | 720   | Ecm1          |
| Ecm2          | 215  | 242  | 180   | 214   | 373   | 302   | 325  | 360   | 338   | 326   | 399   | 299   | 335   | 304   | 210  | 220  | 199   | 341  | 175   | 276  | 368  | 386   | 479   | 239   | 264   | 229  | 336   | 303   | Ecm2          |
| Ecpas         | 9164 | 7428 | 6422  | 6089  | 7692  | 8023  | 7843 | 14946 | 13017 | 10585 | 11938 | 11612 | 11751 | 11653 | 9403 | 8200 | 6193  | 6552 | 6871  | 8274 | 7586 | 11535 | 12890 | 10385 | 11816 | 8510 | 12035 | 11939 | Ecpas         |
| Ecr4          | 51   | 62   | 21    | 90    | 169   | 205   | 87   | 153   | 375   | 271   | 322   | 130   | 156   | 87    | 86   | 87   | 43    | 198  | 111   | 135  | 107  | 353   | 715   | 131   | 245   | 60   | 78    | 55    | Ecr4          |
| Ecsr          | 322  | 292  | 372   | 313   | 343   | 340   | 296  | 521   | 485   | 486   | 644   | 597   | 734   | 566   | 381  | 351  | 356   | 309  | 362   | 372  | 280  | 568   | 697   | 577   | 508   | 720  | 551   | 629   | Ecsr          |
| Ecsit         | 1554 | 2081 | 1736  | 1864  | 1745  | 1695  | 1587 | 1224  | 1509  | 1534  | 1410  | 1497  | 1436  | 1389  | 1441 | 1697 | 1750  | 1703 | 1887  | 1522 | 1772 | 1501  | 1525  | 1528  | 1580  | 1453 | 1465  | 1404  | Ecsit         |
| Ect2          | 8111 | 6691 | 7775  | 5548  | 4565  | 5388  | 6502 | 7850  | 6291  | 5395  | 5137  | 9560  | 7626  | 9932  | 7489 | 6598 | 6591  | 5085 | 5574  | 6658 | 5563 | 5038  | 5655  | 7426  | 6624  | 9977 | 9692  | 10053 | Ect2          |
| Ect2l         | 6    | 17   | 13    | 2     | 5     | 10    | 7    | 15    | 19    | 10    | 27    | 22    | 10    | 16    | 18   | 22   | 7     | 9    | 3     | 8    | 7    | 8     | 32    | 15    | 7     | 12   | 9     | 2     | Ect2l         |
| Eda           | 1495 | 1255 | 1237  | 1222  | 1028  | 989   | 1046 | 689   | 813   | 744   | 864   | 663   | 745   | 641   | 1246 | 1305 | 1197  | 1207 | 1022  | 853  | 910  | 735   | 843   | 660   | 670   | 676  | 654   | 774   | Eda           |
| Eda2r         | 581  | 530  | 517   | 416   | 479   | 465   | 536  | 280   | 253   | 188   | 249   | 270   | 232   | 270   | 596  | 505  | 533   | 439  | 526   | 565  | 483  | 226   | 293   | 233   | 276   | 165  | 279   | 286   | Eda2r         |
| Edar          | 144  | 125  | 159   | 104   | 65    | 139   | 118  | 110   | 135   | 120   | 65    | 66    | 43    | 73    | 98   | 111  | 110   | 142  | 127   | 101  | 111  | 55    | 111   | 108   | 95    | 110  | 70    | 78    | Edar          |
| Edaradd       | 230  | 143  | 300   | 15    |       |       |      |       |       |       |       |       |       |       |      |      |       |      |       |      |      |       |       |       |       |      |       |       |               |

|         |       |       |       |       |       |       |       |       |       |       |       |       |       |       |       |       |       |       |       |       |       |       |       |       |       |       |       |       |         |
|---------|-------|-------|-------|-------|-------|-------|-------|-------|-------|-------|-------|-------|-------|-------|-------|-------|-------|-------|-------|-------|-------|-------|-------|-------|-------|-------|-------|-------|---------|
| Eef2kmt | 475   | 528   | 483   | 390   | 376   | 378   | 358   | 445   | 520   | 452   | 534   | 525   | 507   | 412   | 398   | 471   | 375   | 396   | 382   | 389   | 325   | 393   | 565   | 512   | 401   | 610   | 582   | 509   | Eef2kmt |
| Eefsec  | 1292  | 1404  | 1264  | 1033  | 871   | 1038  | 816   | 1192  | 1460  | 1237  | 1213  | 1514  | 1320  | 1212  | 1129  | 1249  | 1196  | 1012  | 1109  | 994   | 928   | 1084  | 1416  | 1340  | 1227  | 1591  | 1317  | 1303  | Eefsec  |
| Eepnd1  | 1170  | 1190  | 1174  | 961   | 929   | 830   | 827   | 557   | 669   | 530   | 650   | 433   | 473   | 388   | 1006  | 1229  | 959   | 1119  | 825   | 848   | 801   | 568   | 608   | 477   | 488   | 510   | 482   | 376   | Eepnd1  |
| Efcab1  | 911   | 702   | 740   | 691   | 610   | 679   | 694   | 1136  | 1069  | 814   | 752   | 820   | 864   | 844   | 1106  | 938   | 643   | 530   | 639   | 923   | 668   | 1048  | 1067  | 658   | 694   | 761   | 724   | 858   | Efcab1  |
| Efcab10 | 24    | 25    | 14    | 24    | 16    | 27    | 38    | 22    | 43    | 50    | 30    | 28    | 37    | 27    | 25    | 34    | 22    | 22    | 22    | 30    | 45    | 30    | 34    | 30    | 23    | 10    | 10    | 33    | Efcab10 |
| Efcab11 | 974   | 993   | 1035  | 726   | 594   | 707   | 822   | 670   | 653   | 536   | 519   | 945   | 762   | 1023  | 1052  | 1026  | 984   | 617   | 668   | 823   | 684   | 443   | 627   | 742   | 647   | 955   | 1005  | 898   | Efcab11 |
| Efcab12 | 288   | 422   | 290   | 419   | 456   | 410   | 383   | 355   | 345   | 392   | 378   | 400   | 386   | 378   | 323   | 328   | 349   | 347   | 487   | 375   | 431   | 500   | 373   | 307   | 418   | 224   | 400   | 373   | Efcab12 |
| Efcab14 | 5717  | 5053  | 5050  | 4648  | 4028  | 4666  | 4634  | 3814  | 3573  | 3462  | 3709  | 3786  | 3721  | 3719  | 5036  | 5523  | 4815  | 4571  | 4209  | 4207  | 4757  | 3474  | 3453  | 3466  | 3294  | 3552  | 3916  | 3858  | Efcab14 |
| Efcab15 | 18    | 17    | 23    | 35    | 39    | 10    | 21    | 11    | 27    | 38    | 27    | 16    | 2     | 21    | 8     | 14    | 16    | 23    | 23    | 17    | 25    | 23    | 12    | 20    | 24    | 10    | 12    | 17    | Efcab15 |
| Efcab2  | 738   | 584   | 755   | 711   | 770   | 735   | 900   | 1237  | 1060  | 1200  | 1169  | 1311  | 1382  | 1337  | 840   | 807   | 677   | 713   | 775   | 956   | 798   | 1176  | 1192  | 1090  | 1279  | 1180  | 1306  | 1273  | Efcab2  |
| Efcab5  | 104   | 117   | 61    | 94    | 110   | 122   | 158   | 239   | 240   | 179   | 255   | 181   | 126   | 194   | 82    | 94    | 86    | 108   | 98    | 143   | 154   | 236   | 209   | 218   | 255   | 115   | 166   | 125   | Efcab5  |
| Efcab6  | 148   | 120   | 101   | 205   | 190   | 141   | 203   | 50    | 83    | 69    | 73    | 63    | 28    | 47    | 132   | 121   | 123   | 175   | 198   | 163   | 239   | 84    | 63    | 69    | 79    | 61    | 51    | 26    | Efcab6  |
| Efcab7  | 2     | 1     | 0     | 6     | 2     | 2     | 1     | 1     | 7     | 8     | 7     | 1     | 1     | 0     | 3     | 2     | 0     | 3     | 3     | 3     | 1     | 7     | 3     | 1     | 2     | 3     | 6     | 1     | Efcab7  |
| Efcab8  | 14    | 13    | 9     | 13    | 10    | 22    | 10    | 7     | 5     | 10    | 8     | 8     | 7     | 6     | 13    | 6     | 13    | 22    | 16    | 12    | 27    | 23    | 14    | 7     | 19    | 12    | 16    | 7     | Efcab8  |
| Efcab9  | 44    | 44    | 46    | 22    | 34    | 49    | 54    | 10    | 14    | 24    | 6     | 21    | 15    | 16    | 53    | 44    | 64    | 42    | 33    | 54    | 46    | 18    | 12    | 5     | 25    | 11    | 9     | 13    | Efcab9  |
| Efcc1   | 137   | 192   | 157   | 141   | 272   | 199   | 154   | 180   | 233   | 215   | 202   | 218   | 374   | 191   | 202   | 261   | 137   | 156   | 184   | 203   | 139   | 269   | 300   | 148   | 243   | 108   | 278   | 179   | Efcc1   |
| Efemp1  | 1210  | 800   | 922   | 526   | 277   | 721   | 173   | 1056  | 1645  | 899   | 1664  | 755   | 1077  | 785   | 1093  | 1331  | 747   | 743   | 258   | 265   | 210   | 859   | 1850  | 842   | 622   | 887   | 952   | 724   | Efemp1  |
| Efemp2  | 2028  | 2236  | 1965  | 1543  | 1420  | 1585  | 1043  | 2026  | 2754  | 2102  | 2914  | 2057  | 2549  | 1822  | 1908  | 2597  | 1808  | 1675  | 1323  | 1026  | 1075  | 2089  | 3097  | 2258  | 1676  | 2253  | 2116  | 2063  | Efemp2  |
| Efbh    | 191   | 205   | 212   | 268   | 246   | 269   | 260   | 129   | 113   | 106   | 127   | 160   | 191   | 120   | 244   | 228   | 226   | 202   | 226   | 259   | 243   | 160   | 194   | 87    | 120   | 119   | 126   | 116   | Efbh    |
| Efhc1   | 198   | 187   | 125   | 145   | 138   | 176   | 129   | 188   | 218   | 165   | 201   | 161   | 213   | 130   | 178   | 220   | 165   | 157   | 121   | 156   | 139   | 242   | 247   | 128   | 131   | 130   | 182   | 128   | Efhc1   |
| Efhc2   | 119   | 110   | 87    | 62    | 102   | 90    | 74    | 78    | 116   | 89    | 62    | 71    | 77    | 81    | 105   | 156   | 41    | 76    | 88    | 82    | 75    | 124   | 121   | 63    | 74    | 79    | 53    | 70    | Efhc2   |
| Efhd1   | 263   | 326   | 410   | 308   | 369   | 252   | 361   | 73    | 74    | 79    | 89    | 92    | 101   | 86    | 277   | 266   | 363   | 299   | 361   | 313   | 314   | 122   | 99    | 97    | 93    | 112   | 53    | 109   | Efhd1   |
| Efhd2   | 3079  | 3953  | 3920  | 4203  | 4308  | 3896  | 3892  | 2646  | 3112  | 3370  | 3270  | 3397  | 2852  | 3286  | 3072  | 3308  | 4589  | 4341  | 4846  | 3391  | 4246  | 3080  | 2944  | 3832  | 3520  | 3357  | 3024  | 3191  | Efhd2   |
| Efi1    | 2569  | 2645  | 2646  | 2360  | 1993  | 1985  | 2164  | 1856  | 1769  | 1619  | 1506  | 1748  | 1622  | 1754  | 2422  | 2562  | 2360  | 2206  | 2111  | 2153  | 2081  | 1357  | 1702  | 1687  | 1538  | 1748  | 1827  | 1720  | Efi1    |
| Efna1   | 610   | 638   | 709   | 556   | 448   | 531   | 400   | 365   | 675   | 554   | 612   | 468   | 568   | 484   | 576   | 798   | 541   | 551   | 462   | 369   | 407   | 409   | 726   | 577   | 410   | 625   | 457   | 498   | Efna1   |
| Efna2   | 1711  | 1993  | 3479  | 2315  | 2086  | 2122  | 1662  | 1795  | 1682  | 2509  | 2211  | 3018  | 2366  | 2819  | 1702  | 1895  | 2868  | 2083  | 2440  | 1574  | 2055  | 2376  | 1760  | 2844  | 2503  | 2687  | 2674  | 3031  | Efna2   |
| Efna3   | 2015  | 2630  | 1766  | 2504  | 2055  | 2321  | 1960  | 811   | 1019  | 1009  | 1045  | 607   | 730   | 615   | 1986  | 2441  | 2094  | 2698  | 2139  | 2218  | 1911  | 734   | 1002  | 869   | 948   | 656   | 539   | 570   | Efna3   |
| Efna4   | 1441  | 1658  | 1645  | 1524  | 1163  | 1171  | 1157  | 946   | 1202  | 1088  | 1027  | 1036  | 1253  | 1137  | 1201  | 1617  | 1455  | 1354  | 1260  | 1257  | 1144  | 677   | 1200  | 1232  | 980   | 1632  | 1135  | 1258  | Efna4   |
| Efna5   | 2985  | 2344  | 4686  | 3853  | 3209  | 3374  | 1998  | 4498  | 4239  | 5788  | 5546  | 5779  | 6343  | 6236  | 2711  | 3116  | 3962  | 3489  | 3469  | 2177  | 2973  | 5820  | 5029  | 6293  | 5447  | 5836  | 5935  | 7175  | Efna5   |
| Efnb1   | 7626  | 9873  | 11334 | 11181 | 8299  | 8786  | 8061  | 6935  | 8359  | 9133  | 8320  | 11979 | 9394  | 10381 | 7159  | 8486  | 10772 | 9841  | 10076 | 7974  | 7862  | 6199  | 7278  | 11070 | 9558  | 14327 | 9767  | 9692  | Efnb1   |
| Efnb2   | 8088  | 7986  | 8251  | 11711 | 10294 | 9933  | 11148 | 9108  | 10181 | 11240 | 11266 | 11788 | 10137 | 12493 | 7915  | 8731  | 10097 | 11669 | 10772 | 8114  | 10251 | 9015  | 8741  | 12828 | 13131 | 13920 | 9073  | 10652 | Efnb2   |
| Efnb3   | 8930  | 11564 | 10758 | 13322 | 13949 | 13578 | 12533 | 10087 | 10763 | 12008 | 10558 | 11246 | 10571 | 11626 | 9742  | 9948  | 12791 | 13442 | 14179 | 12382 | 13273 | 13964 | 10031 | 12402 | 13845 | 11283 | 10676 | 10867 | Efnb3   |
| Efr3a   | 8929  | 7069  | 5936  | 6480  | 6824  | 7459  | 7564  | 4894  | 4514  | 3646  | 3997  | 3762  | 3936  | 3856  | 8687  | 8094  | 6147  | 7321  | 6138  | 7492  | 7276  | 3907  | 4783  | 3411  | 3455  | 3437  | 3977  | 3752  | Efr3a   |
| Efr3b   | 7200  | 7861  | 8082  | 11563 | 14708 | 12285 | 12524 | 8259  | 7874  | 10994 | 9266  | 9865  | 8917  | 9436  | 7752  | 7378  | 10348 | 12559 | 13390 | 10112 | 13101 | 12885 | 7416  | 9593  | 12610 | 6093  | 8638  | 8399  | Efr3b   |
| Efs     | 860   | 849   | 1005  | 731   | 1064  | 853   | 860   | 2186  | 3022  | 2952  | 3196  | 2928  | 2501  | 2650  | 702   | 794   | 1128  | 842   | 1139  | 823   | 785   | 2211  | 2999  | 3200  | 2530  | 3480  | 2704  | 2610  | Efs     |
| Eftud2  | 15523 | 17179 | 15395 | 13804 | 11657 | 13138 | 12948 | 10699 | 11796 | 12038 | 10779 | 15127 | 13439 | 13750 | 13917 | 14620 | 14371 | 13085 | 14258 | 13124 | 13103 | 10432 | 10934 | 12870 | 12510 | 16481 | 14559 | 15455 | Eftud2  |
| Egf     | 236   | 198   | 159   | 206   | 294   | 214   | 238   | 2899  | 301   | 282   | 294   | 240   | 330   | 252   | 261   | 165   | 147   | 199   | 221   | 284   | 218   | 286   | 271   | 217   | 260   | 229   | 271   | 231   | Egf     |
| Egfm1   | 339   | 404   | 568   | 379   | 263   | 313   | 268   | 337   | 387   | 218   | 163   | 399   | 312   | 362   | 382   | 286   | 353   | 263   | 286   | 366   | 261   | 338   | 229   | 261   | 268   | 327   | 425   | 515   | Egfm1   |
| Egf16   | 1380  | 1061  | 1065  | 729   | 332   | 1315  | 142   | 1915  | 2871  | 2295  | 4106  | 1412  | 1876  | 1386  | 1298  | 1424  | 864   | 1468  | 502   | 271   | 159   | 1171  | 4424  | 2004  | 1272  | 1468  | 1453  | 1259  | Egf16   |
| Egf17   | 968   | 1185  | 1330  | 1011  | 1079  | 937   | 917   | 1043  | 1279  | 1485  | 1700  | 1470  | 1665  | 1304  | 968   | 1231  | 1114  | 971   | 957   | 1008  | 811   | 1176  | 1604  | 1346  | 1528  | 1605  | 1543  | 1310  | Egf17   |
| Egf18   | 88    | 136   | 114   | 131   | 94    | 81    | 115   | 94    | 117   | 112   | 123   | 98    | 75    | 74    | 62    | 110   | 148   | 118   | 127   | 114   | 109   | 129   | 88    | 107   | 104   | 95    | 88    | 83    | Egf18   |
| Egflam  | 1189  | 1493  | 1395  | 1178  | 1073  | 1157  | 554   | 1296  | 1812  | 1817  | 2456  | 1825  | 2467  | 1701  | 1265  | 1998  | 1070  | 1360  | 651   | 703   | 581   | 1803  | 2176  | 1707  | 1550  | 2015  | 1901  | 1818  | Egflam  |
| Egr     | 2217  | 1317  | 1139  | 1015  | 808   | 1081  | 412   | 1956  | 2962  | 1973  | 3450  | 1322  | 2044  | 1414  | 1572  | 2296  | 906   | 1302  | 475   | 622   | 543   | 2094  | 3506  | 1742  | 1565  | 1463  | 1520  | 1171  | Egr     |
| Egln1   | 5236  | 5135  | 6350  | 5738  | 6383  | 6005  | 6201  | 5097  | 5501  | 6210  | 5904  | 6425  | 5640  | 6709  | 4892  | 4967  | 6471  | 5966  | 6708  | 5222  | 6091  | 5479  | 5258  | 6685  | 6466  | 7160  | 6015  | 6782  | Egln1   |
| Egln2   | 2526  | 3300  | 3064  | 3497  | 3423  | 3205  | 2672  | 4080  | 4584  | 5176  | 4475  | 5221  | 4617  | 4531  | 2467  | 2551  | 3497  | 3158  | 3607  | 2907  | 2979  | 4405  | 4202  | 5102  | 5098  | 5535  | 4852  | 4522  | Egln2   |
| Egln3   | 1316  | 1481  | 1354  | 1605  | 1405  | 1379  | 1256  | 670   | 755   | 707   | 674   | 491   | 670   | 518   | 1429  | 1427  | 1502  | 1615  | 1400  | 1322  | 1328  | 700   | 821   | 609   | 574   | 622   | 440   | 495   | Egln3   |
| Egr1    | 664   | 583   | 516   | 638   | 447   | 438   | 380   | 206   | 312   | 323   | 550   | 240   | 264   | 214   | 517   | 671   | 556   | 578   | 408   | 318   | 382   | 334   | 356   | 333   | 244   | 328   | 194   | 221   | Egr1    |
| Egr3    | 99    | 77    | 143   | 97    | 123   | 96    | 131   | 71    | 133   | 135   | 111   | 112   | 33    | 113   | 74    | 66    | 95    | 122   | 120   | 103   | 129   | 127   | 155   | 150   | 158   | 156   | 86    | 87    | Egr3    |
| Egr4    | 12    | 18    | 13    | 20    | 7     | 10    | 0     | 0     | 0     | 3     | 0     | 1     | 0     | 1     | 11    | 15    | 13    | 5     | 3     | 7     | 0     | 0</   |       |       |       |       |       |       |         |

|          |        |        |        |        |        |        |        |        |        |        |        |        |        |        |        |        |        |        |        |        |        |        |        |        |        |        |          |        |          |
|----------|--------|--------|--------|--------|--------|--------|--------|--------|--------|--------|--------|--------|--------|--------|--------|--------|--------|--------|--------|--------|--------|--------|--------|--------|--------|--------|----------|--------|----------|
| Eif2b5   | 7160   | 7434   | 6457   | 6155   | 5496   | 6153   | 5998   | 5843   | 5906   | 5361   | 5225   | 6229   | 5926   | 5990   | 6690   | 6460   | 6185   | 5401   | 6214   | 5767   | 6288   | 5270   | 5793   | 5587   | 5733   | 6801   | 6269     | 6691   | Eif2b5   |
| Eif2d    | 2573   | 2654   | 2026   | 2217   | 2075   | 2289   | 2109   | 2992   | 3087   | 2863   | 3030   | 3074   | 3061   | 2941   | 2268   | 2934   | 1971   | 2136   | 2164   | 2241   | 2328   | 2799   | 3205   | 2743   | 2954   | 3150   | 3126     | 3128   | Eif2d    |
| Eif2s1   | 11100  | 8537   | 9994   | 8505   | 7265   | 8029   | 9829   | 10444  | 9030   | 8339   | 8297   | 9459   | 9334   | 10414  | 11045  | 9650   | 9073   | 8168   | 8021   | 9689   | 8523   | 7815   | 8907   | 9095   | 8736   | 10837  | 10153    | 11153  | Eif2s1   |
| Eif2s2   | 17788  | 13833  | 16844  | 14010  | 11889  | 12988  | 14855  | 14488  | 12560  | 11761  | 11593  | 13436  | 12735  | 14789  | 17359  | 16129  | 14768  | 13046  | 13196  | 16612  | 13938  | 10676  | 12902  | 12912  | 11742  | 15960  | 14205    | 16459  | Eif2s2   |
| Eif2s3x  | 15060  | 13953  | 13697  | 12397  | 11142  | 12000  | 12896  | 12544  | 11221  | 9412   | 9401   | 10949  | 11071  | 11605  | 21074  | 19091  | 17717  | 16367  | 15054  | 18901  | 16929  | 14499  | 15912  | 15094  | 15611  | 16691  | 18131    | 18557  | Eif2s3x  |
| Eif2s3y  | 7981   | 6135   | 7438   | 7641   | 8112   | 7729   | 10240  | 7540   | 7236   | 7295   | 5487   | 8089   | 8238   | 9460   | 12     | 2      | 1      | 0      | 0      | 2      | 1      | 0      | 17     | 0      | 0      | 1      | 0        | 2      | Eif2s3y  |
| Eif3a    | 44240  | 37911  | 45395  | 42684  | 38647  | 40429  | 43067  | 47588  | 42207  | 42676  | 42504  | 46140  | 45409  | 51142  | 45039  | 41131  | 42767  | 40124  | 39200  | 44244  | 40031  | 38573  | 40944  | 44638  | 41791  | 45407  | 48693    | 48772  | Eif3a    |
| Eif3b    | 20765  | 22481  | 21588  | 20290  | 16904  | 17914  | 18393  | 14100  | 14997  | 14560  | 14132  | 16778  | 15610  | 16208  | 19060  | 19317  | 20578  | 19370  | 19999  | 16794  | 18941  | 13252  | 14354  | 15909  | 14461  | 19432  | 16899    | 17531  | Eif3b    |
| Eif3c    | 30349  | 32065  | 28959  | 25190  | 23860  | 25426  | 26333  | 25850  | 23933  | 21818  | 21179  | 24996  | 24116  | 25191  | 30793  | 27882  | 27081  | 24890  | 25976  | 27974  | 26656  | 21373  | 23680  | 23267  | 23127  | 26644  | 26714    | 26918  | Eif3c    |
| Eif3d    | 10171  | 11943  | 10194  | 9827   | 8336   | 9222   | 8752   | 9553   | 10401  | 9616   | 9434   | 11285  | 10593  | 10712  | 9595   | 9670   | 9978   | 8683   | 9988   | 9306   | 9123   | 8722   | 10396  | 10474  | 10243  | 13037  | 11979    | 11750  | Eif3d    |
| Eif3e    | 21609  | 16455  | 16606  | 15681  | 13677  | 15241  | 17108  | 20861  | 18761  | 15821  | 16151  | 16154  | 16780  | 18214  | 22045  | 19008  | 15723  | 14223  | 14882  | 19535  | 16566  | 15478  | 19442  | 16324  | 14924  | 19310  | 17767    | 19869  | Eif3e    |
| Eif3f    | 11220  | 11857  | 13684  | 13821  | 11872  | 11753  | 11015  | 10733  | 11515  | 12376  | 12436  | 13573  | 11636  | 12754  | 11079  | 11300  | 13555  | 13018  | 13858  | 9274   | 12687  | 12579  | 11990  | 13885  | 13058  | 16019  | 11920    | 13531  | Eif3f    |
| Eif3g    | 7303   | 8636   | 9100   | 8038   | 6357   | 6713   | 6840   | 5378   | 5812   | 6473   | 6061   | 7139   | 6913   | 7195   | 6926   | 7256   | 8208   | 6999   | 7697   | 6978   | 7242   | 4821   | 5662   | 6949   | 6537   | 8411   | 7470     | 7849   | Eif3g    |
| Eif3h    | 15915  | 16445  | 14784  | 14927  | 13111  | 14177  | 13662  | 14360  | 14138  | 13954  | 13312  | 13927  | 13729  | 13873  | 15306  | 14897  | 14865  | 13481  | 14690  | 15498  | 14541  | 12529  | 14903  | 14269  | 13519  | 15697  | 14419    | 14859  | Eif3h    |
| Eif3i    | 9596   | 11191  | 9110   | 8431   | 7106   | 6994   | 8212   | 7772   | 8210   | 6784   | 7198   | 8065   | 7905   | 7960   | 9537   | 9820   | 9006   | 7779   | 8270   | 9654   | 8589   | 6259   | 8167   | 7798   | 7159   | 8996   | 8559     | 8883   | Eif3i    |
| Eif3j1   | 7294   | 5613   | 8223   | 6615   | 5659   | 6092   | 6748   | 5588   | 4988   | 5183   | 5496   | 5807   | 5709   | 6209   | 7130   | 6611   | 6843   | 6377   | 6278   | 6378   | 6377   | 5518   | 5136   | 5445   | 5523   | 7020   | 5853     | 6506   | Eif3j1   |
| Eif3j2   | 518    | 278    | 403    | 383    | 241    | 294    | 296    | 360    | 248    | 212    | 250    | 282    | 295    | 309    | 468    | 382    | 350    | 408    | 359    | 315    | 310    | 341    | 242    | 324    | 267    | 306    | 318      | 331    | Eif3j2   |
| Eif3k    | 8221   | 9926   | 7654   | 7575   | 6554   | 7011   | 7125   | 7224   | 7901   | 7318   | 7112   | 7421   | 7592   | 7575   | 7917   | 8364   | 7596   | 6842   | 7875   | 8404   | 7606   | 6046   | 8225   | 7850   | 6967   | 8313   | 7967     | 8289   | Eif3k    |
| Eif3l    | 16257  | 17610  | 14082  | 12897  | 11362  | 11964  | 13194  | 13071  | 12778  | 10679  | 10691  | 12144  | 11731  | 13262  | 15387  | 15090  | 13243  | 12009  | 12738  | 14267  | 13483  | 10036  | 12695  | 11954  | 11200  | 14117  | 12796    | 14310  | Eif3l    |
| Eif3m    | 9165   | 7677   | 7580   | 6710   | 5904   | 6655   | 8170   | 9441   | 8740   | 7065   | 7128   | 8047   | 8010   | 8792   | 9544   | 8652   | 7004   | 6522   | 6831   | 8875   | 7309   | 6990   | 8827   | 7899   | 9248   | 8788   | 9769     | Eif3m  |          |
| Eif4a1   | 48734  | 46716  | 46586  | 41653  | 37372  | 38790  | 46736  | 70420  | 61801  | 55762  | 53842  | 67376  | 60214  | 77296  | 49265  | 41250  | 43343  | 39173  | 40297  | 47231  | 43617  | 54243  | 45101  | 65540  | 61830  | 78385  | 71290    | 78262  | Eif4a1   |
| Eif4a2   | 25155  | 20640  | 25579  | 28463  | 29622  | 36309  | 31176  | 50044  | 43063  | 40262  | 44668  | 26729  | 35434  | 38611  | 29488  | 25079  | 25644  | 29675  | 27938  | 31919  | 30280  | 46062  | 45104  | 40427  | 40939  | 38538  | 35307    | 36458  | Eif4a2   |
| Eif4a3   | 6899   | 8215   | 9087   | 8074   | 6905   | 7352   | 7735   | 5455   | 6331   | 7027   | 6655   | 8619   | 7538   | 8817   | 6287   | 6853   | 9144   | 7288   | 7928   | 6862   | 7714   | 5820   | 5811   | 8055   | 7227   | 10087  | 8766     | 9449   | Eif4a3   |
| Eif4a3i1 | 1      | 1      | 0      | 0      | 1      | 0      | 2      | 0      | 0      | 0      | 0      | 0      | 0      | 0      | 0      | 0      | 0      | 1      | 0      | 0      | 0      | 0      | 0      | 0      | 0      | 0      | 0        | 0      | Eif4a3i1 |
| Eif4a3i2 | 15     | 18     | 12     | 13     | 13     | 18     | 6      | 20     | 5      | 8      | 8      | 20     | 10     | 13     | 15     | 7      | 10     | 8      | 16     | 15     | 18     | 30     | 12     | 26     | 16     | 13     | 15       | 13     | Eif4a3i2 |
| Eif4b    | 27644  | 25754  | 26125  | 24602  | 22863  | 24705  | 24453  | 31630  | 32023  | 30910  | 31217  | 32109  | 30709  | 32305  | 25709  | 24161  | 25362  | 24027  | 26221  | 24999  | 24903  | 27960  | 32134  | 30912  | 30456  | 34226  | 32511    | 34051  | Eif4b    |
| Eif4e    | 14504  | 11629  | 12966  | 11569  | 11302  | 11751  | 13943  | 15408  | 13282  | 11672  | 11319  | 13568  | 12744  | 14600  | 14778  | 11995  | 12250  | 12379  | 11972  | 14230  | 12720  | 13363  | 12516  | 12821  | 12780  | 15785  | 14274    | 15572  | Eif4e    |
| Eif4e1b  | 0      | 0      | 0      | 0      | 2      | 0      | 0      | 0      | 0      | 0      | 0      | 0      | 0      | 1      | 0      | 0      | 0      | 0      | 0      | 1      | 0      | 1      | 2      | 5      | 0      | 0      | 0        | 0      | Eif4e1b  |
| Eif4e2   | 6676   | 6916   | 7645   | 7186   | 6469   | 6507   | 6419   | 7034   | 6756   | 6804   | 7381   | 7770   | 7402   | 7946   | 6421   | 6736   | 7128   | 6782   | 6919   | 6256   | 6644   | 7058   | 6886   | 7315   | 7409   | 8269   | 8157     | 8109   | Eif4e2   |
| Eif4e3   | 960    | 764    | 954    | 720    | 692    | 790    | 808    | 844    | 830    | 840    | 859    | 908    | 819    | 945    | 778    | 877    | 730    | 587    | 748    | 704    | 770    | 857    | 804    | 939    | 782    | 1174   | 948      | 1042   | Eif4e3   |
| Eif4ebp1 | 1264   | 1321   | 996    | 795    | 554    | 736    | 571    | 473    | 611    | 532    | 652    | 439    | 619    | 551    | 976    | 1291   | 899    | 750    | 591    | 708    | 511    | 369    | 742    | 503    | 397    | 695    | 589      | 638    | Eif4ebp1 |
| Eif4ebp2 | 28307  | 29014  | 36944  | 37292  | 30815  | 29917  | 34198  | 15707  | 16621  | 21179  | 18583  | 26295  | 19143  | 24609  | 25194  | 25797  | 37900  | 37824  | 36658  | 23485  | 35488  | 21896  | 14947  | 24572  | 23483  | 26831  | 20576    | 25023  | Eif4ebp2 |
| Eif4ebp3 | 60     | 81     | 85     | 73     | 75     | 40     | 82     | 39     | 44     | 51     | 67     | 81     | 77     | 67     | 86     | 86     | 65     | 74     | 63     | 62     | 42     | 74     | 46     | 71     | 59     | 64     | Eif4ebp3 |        |          |
| Eif4eni1 | 8082   | 7225   | 7428   | 7288   | 6602   | 6743   | 7297   | 7312   | 6917   | 7565   | 7286   | 8194   | 8032   | 8354   | 7472   | 6812   | 7502   | 6871   | 7037   | 6439   | 7083   | 7740   | 6754   | 7508   | 7489   | 8529   | 7946     | 8437   | Eif4eni1 |
| Eif4g1   | 40822  | 43738  | 45095  | 43475  | 40856  | 40745  | 39242  | 38521  | 42025  | 45032  | 44653  | 49945  | 48502  | 47691  | 38153  | 39822  | 44781  | 42238  | 43082  | 37344  | 39969  | 39921  | 40172  | 46233  | 44383  | 48099  | 49609    | 49422  | Eif4g1   |
| Eif4g2   | 120803 | 107417 | 105459 | 104975 | 121911 | 125529 | 129768 | 209889 | 172216 | 172981 | 158700 | 198371 | 181529 | 198947 | 129728 | 102102 | 111943 | 106627 | 121961 | 128599 | 129111 | 195080 | 169427 | 175090 | 187739 | 184555 | 20047    | 202790 | Eif4g2   |
| Eif4g3   | 13923  | 14731  | 18216  | 19951  | 21570  | 19771  | 19676  | 16330  | 17326  | 22861  | 20915  | 24453  | 23211  | 24014  | 13834  | 14576  | 19463  | 19818  | 21174  | 15392  | 20872  | 23208  | 16845  | 23104  | 23673  | 19552  | 21052    | 23182  | Eif4g3   |
| Eif4h    | 21040  | 24000  | 26899  | 24962  | 22272  | 22333  | 22387  | 20549  | 22731  | 23989  | 25071  | 27604  | 26578  | 27513  | 19299  | 19857  | 25557  | 23366  | 25214  | 18929  | 22454  | 21253  | 22571  | 28097  | 26224  | 32739  | 27901    | 28776  | Eif4h    |
| Eif4i    | 22581  | 16325  | 21025  | 19036  | 21296  | 21799  | 24677  | 31365  | 27465  | 27320  | 27974  | 34362  | 31893  | 35484  | 22115  | 18493  | 20157  | 18913  | 21887  | 20981  | 23074  | 31052  | 27414  | 30394  | 30148  | 34647  | 35523    | 35881  | Eif4i    |
| Eif4j    | 32582  | 32529  | 34856  | 32347  | 27487  | 28425  | 31579  | 22416  | 26107  | 24499  | 23688  | 28477  | 26906  | 30817  | 28917  | 29588  | 33669  | 29067  | 32706  | 28260  | 30963  | 20493  | 23931  | 28455  | 24632  | 35744  | 29115    | 33429  | Eif4j    |
| Eif5a2   | 6642   | 5262   | 4572   | 5215   | 4567   | 4996   | 5299   | 2842   | 2323   | 2089   | 2192   | 2380   | 2507   | 2317   | 6963   | 5847   | 4523   | 5142   | 4140   | 5671   | 4838   | 2354   | 2324   | 1802   | 2026   | 2149   | 2459     | 2300   | Eif5a2   |
| Eif5b    | 23273  | 19206  | 26258  | 21982  | 18195  | 20349  | 20964  | 16399  | 14876  | 16384  | 15470  | 17019  | 16974  | 18264  | 23662  | 22039  | 23592  | 21202  | 18786  | 20717  | 19411  | 14967  | 14994  | 17153  | 15696  | 18610  | 17788    | 18409  | Eif5b    |
| Eif6     | 5928   | 7226   | 6944   | 6817   | 5407   | 5401   | 5290   | 3644   | 3819   | 3757   | 3577   | 4451   | 4284   | 3885   | 5703   | 5765   | 6627   | 5914   | 6650   | 5945   | 5530   | 3106   | 3767   | 4291   | 4005   | 5214   | 4568     | 4417   | Eif6     |
| Eifp1    | 1916   | 2590   | 2208   | 2508   | 2405   | 2241   | 2107   | 1912   | 1989   | 2007   | 1758   | 1930   | 1738   | 1658   | 2156   | 2144   | 2444   | 2336   | 2448   | 2700   | 2347   | 1805   | 1962   | 1901   | 2060   | 1848   | 1928     | 1885   | Eifp1    |
| Elac1    | 1211   | 1063   | 1204   | 1125   | 1161   | 1061   | 119    |        |        |        |        |        |        |        |        |        |        |        |        |        |        |        |        |        |        |        |          |        |          |

|         |       |       |       |       |       |       |       |       |       |       |       |       |       |       |       |       |       |       |       |       |       |       |       |       |       |       |       |       |         |
|---------|-------|-------|-------|-------|-------|-------|-------|-------|-------|-------|-------|-------|-------|-------|-------|-------|-------|-------|-------|-------|-------|-------|-------|-------|-------|-------|-------|-------|---------|
| Elov2   | 4174  | 4041  | 3796  | 4173  | 4791  | 4724  | 6040  | 4476  | 3853  | 4056  | 3160  | 4846  | 3978  | 5210  | 4327  | 3173  | 4567  | 4401  | 5259  | 5142  | 5689  | 4132  | 3366  | 4294  | 4671  | 4552  | 4701  | 5073  | Elov2   |
| Elov3   | 3     | 11    | 20    | 0     | 5     | 6     | 4     | 0     | 5     | 0     | 0     | 1     | 0     | 5     | 13    | 8     | 10    | 10    | 2     | 3     | 6     | 2     | 1     | 1     | 0     | 0     | 5     | 2     | Elov3   |
| Elov4   | 4404  | 3943  | 4509  | 4923  | 5048  | 4657  | 5729  | 3482  | 2927  | 2868  | 2810  | 2760  | 2650  | 3260  | 5003  | 4095  | 4516  | 5017  | 4683  | 5431  | 5512  | 3521  | 2795  | 2760  | 3413  | 2603  | 2657  | 3152  | Elov4   |
| Elov5   | 13147 | 13361 | 11761 | 11049 | 9442  | 10055 | 10863 | 5591  | 5071  | 4900  | 4643  | 5362  | 5319  | 5396  | 13676 | 13197 | 11266 | 11266 | 9746  | 11111 | 10366 | 4939  | 5215  | 5111  | 4841  | 6166  | 5722  | 5874  | Elov5   |
| Elov6   | 10054 | 8595  | 9230  | 8265  | 8364  | 9333  | 8998  | 7748  | 7382  | 7827  | 7429  | 8563  | 8211  | 9024  | 9480  | 9027  | 9021  | 8095  | 8416  | 8696  | 8770  | 7778  | 6102  | 7769  | 7960  | 8121  | 8997  | 8890  | Elov6   |
| Elov7   | 391   | 254   | 245   | 234   | 296   | 253   | 265   | 131   | 167   | 131   | 161   | 121   | 145   | 70    | 311   | 299   | 239   | 259   | 238   | 254   | 225   | 157   | 227   | 142   | 101   | 115   | 81    | 77    | Elov7   |
| Elp1    | 17715 | 17011 | 14236 | 13179 | 13152 | 13997 | 14177 | 14875 | 14113 | 11924 | 12701 | 14307 | 14235 | 14564 | 17193 | 15568 | 13122 | 13287 | 13469 | 15055 | 14133 | 12554 | 13268 | 12110 | 13443 | 12576 | 15238 | 15167 | Elp1    |
| Elp2    | 14849 | 14349 | 11870 | 11935 | 11756 | 12748 | 12696 | 15717 | 14085 | 12027 | 11799 | 13070 | 12927 | 13246 | 15504 | 12945 | 12148 | 12184 | 12469 | 14441 | 13138 | 12942 | 13647 | 12773 | 13459 | 13989 | 13925 | 13151 | Elp2    |
| Elp3    | 7012  | 7242  | 6700  | 6451  | 6633  | 6705  | 6239  | 9191  | 8990  | 8709  | 7961  | 8875  | 8577  | 8887  | 7076  | 6413  | 6678  | 6037  | 6890  | 7089  | 6723  | 8363  | 8976  | 8778  | 8907  | 9589  | 9358  | 9371  | Elp3    |
| Elp4    | 2299  | 2103  | 2273  | 1857  | 1768  | 1884  | 2326  | 2273  | 1998  | 1957  | 1902  | 2331  | 2168  | 2494  | 2429  | 1899  | 2243  | 1652  | 1900  | 2211  | 2026  | 1768  | 1955  | 1863  | 2170  | 2273  | 2479  | 2614  | Elp4    |
| Elp5    | 6682  | 7270  | 6439  | 6500  | 5303  | 5556  | 6022  | 4305  | 4063  | 3830  | 3840  | 4464  | 4205  | 4249  | 7247  | 6368  | 6400  | 6567  | 6300  | 6819  | 5974  | 3878  | 4065  | 4249  | 4219  | 4971  | 4593  | 4554  | Elp5    |
| Elp6    | 468   | 488   | 511   | 465   | 515   | 590   | 505   | 1408  | 1481  | 1498  | 1424  | 1640  | 1545  | 1647  | 477   | 372   | 495   | 549   | 603   | 545   | 465   | 1497  | 1401  | 1597  | 1680  | 1711  | 1713  | 1677  | Elp6    |
| Emb     | 1872  | 1157  | 1519  | 896   | 922   | 797   | 844   | 2010  | 1603  | 1476  | 1244  | 1335  | 1532  | 1503  | 1435  | 1557  | 1133  | 825   | 853   | 1002  | 821   | 1252  | 1710  | 1684  | 1016  | 2276  | 1675  | 1697  | Emb     |
| Emc1    | 3387  | 3479  | 3718  | 3896  | 3642  | 3586  | 3532  | 3545  | 3789  | 4219  | 4256  | 4735  | 4427  | 4161  | 3170  | 3296  | 3892  | 3689  | 3667  | 3165  | 3397  | 4547  | 3766  | 4385  | 4542  | 4315  | 4181  | 4345  | Emc1    |
| Emc10   | 2683  | 3307  | 3255  | 3140  | 3543  | 3145  | 2665  | 4151  | 4720  | 4977  | 4572  | 4806  | 4566  | 4295  | 2532  | 2780  | 3318  | 3103  | 3735  | 2938  | 2936  | 4451  | 4739  | 4944  | 4898  | 5445  | 4761  | 4514  | Emc10   |
| Emc2    | 4150  | 3611  | 4882  | 3820  | 3177  | 3447  | 3948  | 3303  | 3090  | 2757  | 2884  | 2845  | 2911  | 3203  | 4759  | 4439  | 4015  | 3761  | 3444  | 4395  | 3583  | 3100  | 3204  | 2862  | 2821  | 3346  | 3220  | 3405  | Emc2    |
| Emc3    | 2691  | 3025  | 2893  | 2536  | 2607  | 2651  | 2575  | 3435  | 3498  | 3253  | 3355  | 3126  | 3030  | 3025  | 2676  | 2696  | 2612  | 2484  | 2657  | 2782  | 2607  | 3091  | 3657  | 3112  | 3092  | 3175  | 3025  | 3183  | Emc3    |
| Emc4    | 2305  | 2537  | 2443  | 2560  | 2390  | 2316  | 2377  | 2463  | 2315  | 2309  | 2382  | 2495  | 2359  | 2224  | 2574  | 2316  | 2591  | 2503  | 2494  | 2677  | 2298  | 2396  | 2402  | 2522  | 2611  | 2592  | 2596  | 2355  | Emc4    |
| Emc6    | 2201  | 2281  | 2397  | 2366  | 1981  | 1855  | 2128  | 2036  | 1782  | 1980  | 1799  | 2146  | 1813  | 2169  | 2359  | 2018  | 2408  | 2102  | 2032  | 2242  | 2173  | 1761  | 1805  | 2061  | 1850  | 2409  | 2172  | 2209  | Emc6    |
| Emc7    | 2728  | 2876  | 2640  | 2849  | 2864  | 2765  | 2776  | 2606  | 2445  | 2281  | 2546  | 2127  | 2080  | 2202  | 3011  | 2910  | 2553  | 2933  | 2544  | 3085  | 2859  | 2520  | 2619  | 2531  | 2018  | 2120  | 2274  | Emc7  |         |
| Emc8    | 6743  | 6772  | 7422  | 7285  | 6443  | 6768  | 6771  | 3841  | 3630  | 4125  | 4175  | 4972  | 4483  | 4924  | 6352  | 6365  | 7507  | 7138  | 6932  | 5899  | 6983  | 3937  | 3670  | 4601  | 4589  | 4956  | 4916  | 4876  | Emc8    |
| Emc9    | 255   | 299   | 350   | 383   | 429   | 266   | 296   | 216   | 213   | 236   | 242   | 230   | 169   | 168   | 233   | 292   | 322   | 347   | 391   | 368   | 349   | 312   | 219   | 201   | 243   | 159   | 203   | 157   | Emc9    |
| Emcn    | 731   | 584   | 607   | 442   | 343   | 419   | 334   | 999   | 1196  | 954   | 1108  | 812   | 1090  | 845   | 670   | 819   | 487   | 421   | 288   | 464   | 315   | 1026  | 1452  | 898   | 763   | 1102  | 949   | 819   | Emcn    |
| Emd     | 4717  | 5410  | 4838  | 4489  | 3472  | 3868  | 4804  | 3566  | 3625  | 3605  | 3433  | 4161  | 4046  | 5339  | 4320  | 4024  | 4673  | 3901  | 4186  | 4241  | 4571  | 2809  | 3625  | 4269  | 3776  | 5229  | 4671  | 5509  | Emd     |
| Eme1    | 1523  | 1617  | 1723  | 1027  | 802   | 994   | 1102  | 1500  | 1571  | 1505  | 1137  | 2363  | 2180  | 2236  | 1332  | 1340  | 1432  | 975   | 1260  | 1207  | 965   | 969   | 1383  | 1924  | 1562  | 2915  | 2646  | 2502  | Eme1    |
| Eme2    | 1747  | 2116  | 1838  | 1777  | 1968  | 1908  | 1798  | 1430  | 1512  | 1684  | 1446  | 1706  | 1589  | 1542  | 1789  | 1776  | 1938  | 1952  | 1894  | 1693  | 1839  | 1688  | 1292  | 1526  | 1530  | 1488  | 1636  | 1780  | Eme2    |
| Emg1    | 4422  | 4756  | 5051  | 4706  | 3654  | 3686  | 4069  | 4825  | 4818  | 5216  | 4795  | 5722  | 5316  | 5421  | 4267  | 4176  | 4876  | 4046  | 4480  | 5192  | 3739  | 3603  | 4713  | 5787  | 5140  | 6966  | 6089  | 5693  | Emg1    |
| Emid1   | 520   | 515   | 592   | 463   | 484   | 517   | 455   | 504   | 719   | 622   | 599   | 517   | 589   | 512   | 446   | 554   | 474   | 524   | 500   | 322   | 411   | 426   | 606   | 554   | 542   | 614   | 476   | 529   | Emid1   |
| Emilin1 | 3722  | 4669  | 4484  | 2825  | 1441  | 3084  | 3476  | 3693  | 6184  | 6068  | 9899  | 4826  | 7236  | 4349  | 3247  | 5791  | 3300  | 3165  | 1362  | 843   | 857   | 5324  | 7123  | 5927  | 6343  | 7223  | 5825  | 4981  | Emilin1 |
| Emilin2 | 1039  | 1170  | 1580  | 677   | 605   | 877   | 467   | 728   | 1003  | 772   | 955   | 941   | 1170  | 729   | 977   | 1282  | 1034  | 647   | 664   | 520   | 467   | 530   | 1118  | 715   | 520   | 1119  | 1219  | 1030  | Emilin2 |
| Emilin3 | 625   | 677   | 935   | 494   | 374   | 508   | 228   | 657   | 1315  | 822   | 2105  | 632   | 764   | 528   | 545   | 779   | 743   | 648   | 339   | 240   | 259   | 827   | 1378  | 847   | 582   | 917   | 837   | 656   | Emilin3 |
| Em1     | 6101  | 7129  | 7241  | 6280  | 5730  | 5486  | 5661  | 5222  | 5121  | 5431  | 4982  | 6187  | 6421  | 5870  | 6397  | 6409  | 6962  | 5904  | 5941  | 5446  | 5611  | 5402  | 5022  | 5553  | 5342  | 6187  | 6638  | 6496  | Em1     |
| Em2     | 2414  | 3048  | 3386  | 4046  | 4131  | 3446  | 2999  | 1557  | 1742  | 2162  | 2139  | 2086  | 1953  | 1629  | 2256  | 2858  | 3980  | 3924  | 3934  | 3255  | 2960  | 2134  | 1860  | 2414  | 2179  | 1991  | 1947  | 1621  | Em2     |
| Em3     | 2212  | 2300  | 2655  | 2469  | 2269  | 2388  | 1816  | 1421  | 1826  | 1856  | 2329  | 1779  | 1965  | 1510  | 1953  | 2331  | 2444  | 2448  | 2360  | 1877  | 1861  | 1604  | 1819  | 1900  | 1740  | 1936  | 1854  | 1684  | Em3     |
| Em4     | 20594 | 17801 | 16622 | 17635 | 17507 | 18394 | 17609 | 12551 | 12600 | 12331 | 12753 | 13433 | 13935 | 12485 | 19561 | 20557 | 16435 | 18315 | 16443 | 17302 | 16776 | 11414 | 12389 | 12030 | 11756 | 11459 | 13249 | 12145 | Em4     |
| Em5     | 23636 | 20852 | 14905 | 20671 | 20196 | 27489 | 27487 | 13174 | 9032  | 9136  | 8331  | 13550 | 12140 | 14078 | 23997 | 19547 | 17208 | 19281 | 20762 | 27010 | 29402 | 8814  | 9023  | 8577  | 11302 | 7746  | 16540 | 12749 | Em5     |
| Em6     | 880   | 1052  | 687   | 1256  | 1850  | 1488  | 1691  | 1428  | 1269  | 1224  | 1253  | 789   | 880   | 817   | 996   | 839   | 976   | 1435  | 1454  | 1702  | 1660  | 1519  | 1289  | 843   | 1266  | 460   | 791   | 665   | Em6     |
| Emp1    | 3205  | 2620  | 2729  | 1618  | 1574  | 3648  | 979   | 6572  | 9383  | 5970  | 10482 | 4909  | 7490  | 5425  | 3641  | 3433  | 1903  | 3299  | 1488  | 1648  | 1266  | 5106  | 12105 | 6436  | 4881  | 3983  | 5521  | 5804  | Emp1    |
| Emp2    | 617   | 434   | 445   | 226   | 328   | 426   | 194   | 607   | 851   | 588   | 668   | 399   | 489   | 372   | 425   | 610   | 319   | 357   | 248   | 203   | 192   | 476   | 936   | 561   | 405   | 463   | 480   | 484   | Emp2    |
| Emp3    | 471   | 570   | 497   | 394   | 290   | 517   | 192   | 700   | 975   | 740   | 1019  | 573   | 837   | 506   | 479   | 638   | 371   | 567   | 267   | 354   | 301   | 720   | 1147  | 659   | 664   | 656   | 744   | 597   | Emp3    |
| Emsy    | 9312  | 8881  | 7945  | 8451  | 8750  | 9222  | 8944  | 10657 | 9642  | 8698  | 8524  | 10113 | 9019  | 9671  | 9283  | 8372  | 8229  | 8089  | 8914  | 9765  | 8973  | 9282  | 8936  | 8584  | 9885  | 8355  | 9827  | 9424  | Emsy    |
| Emx1    | 621   | 758   | 766   | 1044  | 1010  | 1061  | 1387  | 829   | 1027  | 1212  | 839   | 1672  | 1220  | 1704  | 493   | 389   | 829   | 1020  | 1455  | 1183  | 1274  | 404   | 684   | 1765  | 1491  | 2031  | 1293  | 1602  | Emx1    |
| Emx2    | 3230  | 2339  | 4793  | 3739  | 3014  | 3284  | 4505  | 3210  | 2656  | 3786  | 2651  | 5327  | 4073  | 6348  | 2362  | 1652  | 4040  | 3186  | 4126  | 3270  | 4114  | 1977  | 2439  | 5593  | 4020  | 7180  | 4608  | 6886  | Emx2    |
| En1     | 415   | 533   | 887   | 694   | 665   | 733   | 272   | 733   | 627   | 870   | 656   | 930   | 1210  | 793   | 456   | 685   | 856   | 618   | 789   | 539   | 617   | 998   | 632   | 782   | 949   | 267   | 811   | 779   | En1     |
| En2     | 1303  | 1786  | 3147  | 2646  | 1792  | 2007  | 489   | 1403  | 1148  | 1449  | 1183  | 2149  | 3260  | 1933  | 1117  | 2234  | 3218  | 1853  | 2215  | 2005  | 1642  | 2171  | 1310  | 1300  | 2325  | 9     | 2372  | 2432  | En2     |
| Enah    | 22287 | 19147 | 23137 | 24991 | 25334 | 26423 | 26983 | 29501 | 26555 | 32411 | 30868 | 33726 | 38004 | 33505 | 20234 | 21631 | 24308 | 25236 | 26105 | 22253 | 27536 | 33523 | 25770 | 32012 | 34113 | 31317 | 31860 | 32647 | Enah    |
| Enam    | 1     | 0     | 0     | 0     | 0     | 0     | 0     | 2     | 1     | 0     |       |       |       |       |       |       |       |       |       |       |       |       |       |       |       |       |       |       |         |



|         |       |       |       |       |       |       |       |       |       |       |       |       |       |       |       |       |       |       |       |       |       |       |       |       |       |       |       |        |         |
|---------|-------|-------|-------|-------|-------|-------|-------|-------|-------|-------|-------|-------|-------|-------|-------|-------|-------|-------|-------|-------|-------|-------|-------|-------|-------|-------|-------|--------|---------|
| Entpd4b | 201   | 155   | 165   | 92    | 99    | 109   | 104   | 126   | 102   | 135   | 170   | 83    | 70    | 72    | 297   | 155   | 53    | 167   | 203   | 161   | 63    | 206   | 94    | 98    | 120   | 63    | 126   | 109    | Entpd4b |
| Entpd5  | 2581  | 2357  | 2103  | 2185  | 2476  | 2492  | 2505  | 2009  | 1762  | 1836  | 1725  | 1481  | 1593  | 1477  | 2670  | 2369  | 2179  | 2483  | 2385  | 2387  | 2380  | 1746  | 1955  | 1938  | 1492  | 1710  | 1439  | 1423   | Entpd5  |
| Entpd6  | 2298  | 2743  | 2334  | 3003  | 2768  | 2662  | 2586  | 1713  | 2159  | 2120  | 2325  | 1955  | 2046  | 1791  | 2498  | 2541  | 2719  | 3170  | 2731  | 2446  | 2775  | 2324  | 2026  | 1942  | 2312  | 1855  | 1920  | 1911   | Entpd6  |
| Entpd7  | 1288  | 1270  | 1691  | 1670  | 1443  | 1296  | 1367  | 807   | 812   | 1057  | 1068  | 1018  | 978   | 1023  | 1168  | 1283  | 1564  | 1592  | 1404  | 1066  | 1400  | 1146  | 708   | 1094  | 977   | 1128  | 941   | 1180   | Entpd7  |
| Entpd8  | 48    | 62    | 43    | 131   | 119   | 73    | 89    | 6     | 2     | 10    | 4     | 5     | 2     | 5     | 54    | 55    | 71    | 156   | 80    | 59    | 80    | 5     | 2     | 19    | 0     | 6     | 2     | Entpd8 |         |
| Enr1    | 5561  | 6506  | 6335  | 6882  | 6398  | 6112  | 6584  | 5779  | 6217  | 6866  | 6743  | 6453  | 6262  | 6574  | 5450  | 6052  | 6784  | 6882  | 6834  | 5752  | 6596  | 6851  | 5926  | 6957  | 6831  | 7021  | 6358  | 6516   | Enr1    |
| Eny2    | 9766  | 8293  | 10727 | 11099 | 10417 | 10703 | 12241 | 9605  | 8248  | 8859  | 9100  | 10392 | 9673  | 11997 | 10464 | 8418  | 10360 | 10335 | 10015 | 11706 | 11706 | 8748  | 7865  | 9946  | 9752  | 11086 | 10514 | 11932  | Eny2    |
| Eogt    | 1638  | 1426  | 1661  | 1346  | 1668  | 1576  | 1410  | 1562  | 1593  | 1703  | 1886  | 1730  | 1780  | 1709  | 1639  | 1625  | 1417  | 1370  | 1400  | 1396  | 1420  | 1942  | 1734  | 1627  | 1658  | 1748  | 1732  | 1774   | Eogt    |
| Eola1   | 1360  | 1451  | 1272  | 1397  | 1209  | 1377  | 1445  | 1248  | 1047  | 843   | 903   | 955   | 928   | 987   | 1614  | 1274  | 1298  | 1334  | 1308  | 1619  | 1415  | 904   | 1114  | 1022  | 987   | 980   | 1082  | 1011   | Eola1   |
| Eomes   | 1736  | 1544  | 1558  | 2417  | 3614  | 3129  | 4923  | 4180  | 5047  | 5212  | 3657  | 6291  | 3002  | 6783  | 1652  | 775   | 2259  | 2686  | 4601  | 3621  | 4409  | 2413  | 3484  | 7561  | 7703  | 7334  | 3771  | 5001   | Eomes   |
| Ep300   | 8641  | 8350  | 7033  | 8816  | 10708 | 10220 | 9600  | 11155 | 11685 | 11989 | 11793 | 14168 | 13146 | 14252 | 8205  | 8441  | 8429  | 8670  | 10217 | 8584  | 10115 | 12546 | 10418 | 11350 | 13555 | 8280  | 13584 | 12483  | Ep300   |
| Ep400   | 16625 | 17533 | 12826 | 18534 | 18358 | 18760 | 17724 | 15040 | 16139 | 18788 | 17410 | 21188 | 18625 | 19388 | 15539 | 16799 | 15175 | 17480 | 18060 | 15125 | 18922 | 16695 | 14655 | 15343 | 19712 | 12502 | 18750 | 17661  | Ep400   |
| Epas1   | 1789  | 2273  | 2910  | 2919  | 2901  | 2541  | 2455  | 1408  | 1854  | 2547  | 2215  | 2337  | 2444  | 2201  | 1791  | 2362  | 2497  | 3047  | 2677  | 1943  | 2582  | 2784  | 2172  | 2478  | 2662  | 2546  | 2173  | 1998   | Epas1   |
| Epb41   | 25945 | 29286 | 30700 | 25898 | 23325 | 23429 | 22005 | 22947 | 20477 | 22330 | 19095 | 27064 | 31161 | 26816 | 27805 | 27880 | 29787 | 23026 | 24031 | 22601 | 22338 | 21821 | 19537 | 22535 | 22629 | 22289 | 28653 | 30072  | Epb41   |
| Epb411  | 2967  | 2910  | 3165  | 3528  | 5462  | 4557  | 4074  | 6535  | 7929  | 9724  | 8880  | 6847  | 6557  | 6949  | 2981  | 3373  | 3483  | 4150  | 4419  | 3295  | 4544  | 11214 | 7583  | 8297  | 9968  | 5298  | 5905  | 6342   | Epb411  |
| Epb412  | 13723 | 11010 | 11602 | 10307 | 8915  | 10196 | 9346  | 7833  | 8536  | 7932  | 9428  | 6921  | 8695  | 6915  | 11744 | 13717 | 10077 | 10553 | 9204  | 9829  | 9194  | 6104  | 9598  | 7850  | 6383  | 8604  | 7313  | 7033   | Epb412  |
| Epb413  | 7916  | 6545  | 6526  | 6165  | 7492  | 6808  | 6232  | 9210  | 10503 | 8816  | 11129 | 7800  | 10049 | 7485  | 7402  | 8333  | 6494  | 6800  | 6397  | 6217  | 6164  | 9130  | 11011 | 8203  | 8179  | 8464  | 7645  | 7605   | Epb413  |
| Epb414a | 2060  | 2516  | 2985  | 2677  | 3108  | 2948  | 2283  | 3125  | 2726  | 3326  | 2538  | 3212  | 4146  | 2825  | 2602  | 2477  | 3085  | 2619  | 3137  | 2819  | 2683  | 4194  | 2932  | 2953  | 3509  | 2472  | 3395  | 3325   | Epb414a |
| Epb414b | 712   | 611   | 569   | 637   | 1146  | 788   | 664   | 878   | 908   | 1071  | 1010  | 529   | 835   | 502   | 790   | 834   | 625   | 746   | 747   | 616   | 733   | 1136  | 993   | 731   | 789   | 375   | 496   | 511    | Epb414b |
| Epb415  | 7587  | 7603  | 7117  | 7122  | 5886  | 6603  | 6889  | 3480  | 3075  | 3076  | 2881  | 4485  | 3734  | 4456  | 7146  | 6339  | 7187  | 6588  | 6752  | 6400  | 6653  | 2974  | 2774  | 3288  | 3694  | 3609  | 4800  | 4485   | Epb415  |
| Epb42   | 206   | 299   | 271   | 167   | 38    | 113   | 98    | 205   | 240   | 133   | 133   | 292   | 1077  | 502   | 294   | 294   | 111   | 55    | 91    | 191   | 47    | 109   | 223   | 124   | 144   | 336   | 425   | 972    | Epb42   |
| Epc1    | 2969  | 2965  | 3120  | 3948  | 4387  | 3899  | 4267  | 7537  | 6956  | 7211  | 6978  | 7065  | 6643  | 7880  | 3157  | 2602  | 3522  | 3540  | 4029  | 3783  | 4219  | 8126  | 6602  | 7494  | 8401  | 6738  | 7011  | 7589   | Epc1    |
| Epc2    | 2111  | 1572  | 1880  | 2127  | 2666  | 2360  | 2749  | 8716  | 7505  | 7435  | 6741  | 8336  | 7471  | 8462  | 2325  | 1562  | 2137  | 2003  | 2621  | 2584  | 2598  | 8260  | 7263  | 7638  | 8458  | 7299  | 7740  | 7987   | Epc2    |
| Epcam   | 1445  | 714   | 422   | 487   | 275   | 259   | 114   | 1282  | 1475  | 1481  | 1244  | 283   | 612   | 386   | 856   | 850   | 256   | 304   | 175   | 154   | 118   | 418   | 1603  | 1451  | 212   | 1843  | 234   | 358    | Epcam   |
| Epd1    | 775   | 737   | 844   | 766   | 839   | 847   | 869   | 1263  | 1130  | 1136  | 1057  | 1194  | 1184  | 1278  | 964   | 579   | 757   | 777   | 828   | 925   | 870   | 1076  | 1273  | 1163  | 1214  | 1452  | 1232  | 1417   | Epd1    |
| Epg5    | 2     | 0     | 1     | 0     | 0     | 1     | 0     | 0     | 0     | 0     | 0     | 1     | 0     | 1     | 0     | 1     | 0     | 0     | 0     | 2     | 0     | 0     | 0     | 1     | 0     | 0     | 0     | 1      | Epg5    |
| Epgn    | 8     | 13    | 19    | 12    | 20    | 4     | 18    | 20    | 16    | 17    | 16    | 16    | 28    | 27    | 11    | 9     | 22    | 17    | 12    | 22    | 17    | 15    | 19    | 25    | 23    | 24    | 24    | 31     | Epgn    |
| Epha1   | 730   | 402   | 372   | 200   | 95    | 213   | 61    | 288   | 480   | 306   | 284   | 146   | 247   | 159   | 397   | 544   | 176   | 204   | 73    | 51    | 30    | 105   | 431   | 319   | 103   | 267   | 131   | 150    | Epha1   |
| Epha10  | 2164  | 3245  | 4700  | 4287  | 4451  | 3920  | 3004  | 1258  | 1054  | 1357  | 1231  | 1715  | 2183  | 1514  | 2757  | 3219  | 4379  | 4258  | 4539  | 3640  | 3541  | 2099  | 862   | 1396  | 1613  | 422   | 2020  | 1792   | Epha10  |
| Epha2   | 1091  | 1566  | 1612  | 1391  | 810   | 1031  | 641   | 396   | 400   | 617   | 458   | 670   | 737   | 591   | 931   | 1636  | 1576  | 1169  | 1086  | 806   | 809   | 511   | 597   | 605   | 460   | 462   | 686   | 688    | Epha2   |
| Epha3   | 12001 | 9588  | 8031  | 8334  | 8687  | 10031 | 11500 | 11783 | 11755 | 8231  | 9556  | 9507  | 6352  | 10291 | 12932 | 9578  | 9075  | 8479  | 9047  | 12302 | 10238 | 9063  | 11518 | 8354  | 9597  | 8864  | 8745  | 9003   | Epha3   |
| Epha4   | 15201 | 14092 | 11128 | 15228 | 15338 | 16734 | 19215 | 16433 | 15205 | 13568 | 12270 | 15578 | 12119 | 16042 | 15195 | 12656 | 13261 | 15857 | 16984 | 17499 | 18603 | 12155 | 12549 | 15020 | 16269 | 12695 | 14064 | 13402  | Epha4   |
| Epha5   | 4459  | 4242  | 4743  | 7806  | 10664 | 10661 | 13404 | 10353 | 10284 | 10214 | 8406  | 9229  | 7904  | 10653 | 5803  | 3943  | 6231  | 8649  | 9728  | 10286 | 12230 | 9809  | 7892  | 10228 | 13738 | 5685  | 7908  | 7941   | Epha5   |
| Epha6   | 95    | 132   | 59    | 73    | 169   | 195   | 124   | 294   | 302   | 180   | 202   | 84    | 149   | 100   | 167   | 143   | 65    | 110   | 105   | 220   | 154   | 222   | 258   | 98    | 180   | 57    | 99    | 61     | Epha6   |
| Epha7   | 8051  | 7210  | 8583  | 6879  | 6817  | 7641  | 7478  | 8374  | 7440  | 7440  | 7857  | 7938  | 9877  | 9124  | 8380  | 8478  | 7007  | 6960  | 6138  | 7323  | 6727  | 9072  | 8383  | 6923  | 7612  | 6533  | 9581  | 9113   | Epha7   |
| Epha8   | 683   | 1080  | 1809  | 1583  | 1968  | 1379  | 1450  | 744   | 666   | 1034  | 931   | 982   | 818   | 726   | 786   | 945   | 1650  | 1777  | 2135  | 1277  | 1568  | 1465  | 780   | 1212  | 1250  | 415   | 961   | 877    | Epha8   |
| Epb1    | 3128  | 3974  | 3802  | 5319  | 6545  | 6317  | 6254  | 5576  | 5239  | 6966  | 5358  | 6372  | 5732  | 6239  | 4018  | 3283  | 5149  | 5709  | 6698  | 5451  | 7145  | 8238  | 4706  | 6672  | 8040  | 5223  | 5470  | 5884   | Epb1    |
| Epb2    | 20288 | 27586 | 34978 | 35178 | 31108 | 29964 | 28649 | 15404 | 15895 | 22451 | 18118 | 26991 | 21535 | 24117 | 21903 | 23742 | 36848 | 34069 | 34284 | 23587 | 30202 | 24162 | 15723 | 23881 | 24069 | 18525 | 25530 | 26507  | Epb2    |
| Epb3    | 4295  | 4685  | 4956  | 5043  | 3902  | 3907  | 2909  | 2913  | 3957  | 3750  | 4221  | 3094  | 3615  | 2508  | 3239  | 5386  | 4770  | 4909  | 4031  | 2584  | 3406  | 2978  | 3734  | 3944  | 2069  | 4062  | 2837  | 2873   | Epb3    |
| Epb4    | 5529  | 5537  | 5939  | 3881  | 3026  | 3865  | 2489  | 4161  | 5649  | 4751  | 6442  | 4368  | 5574  | 4053  | 4398  | 6518  | 4717  | 4409  | 3415  | 2456  | 2588  | 3795  | 6302  | 4913  | 3671  | 6296  | 4781  | 4656   | Epb4    |
| Epb6    | 1151  | 1284  | 1373  | 1377  | 2107  | 1901  | 1505  | 2013  | 2542  | 2689  | 2364  | 2006  | 2065  | 1738  | 1122  | 1199  | 1130  | 1426  | 2001  | 1522  | 1585  | 2458  | 2391  | 2287  | 2692  | 1939  | 2002  | 1804   | Epb6    |
| Ephx1   | 466   | 532   | 419   | 485   | 601   | 520   | 489   | 200   | 230   | 247   | 232   | 98    | 125   | 89    | 483   | 590   | 505   | 538   | 472   | 484   | 544   | 185   | 349   | 213   | 133   | 129   | 59    | 83     | Ephx1   |
| Ephx2   | 174   | 153   | 211   | 121   | 88    | 84    | 68    | 142   | 150   | 127   | 187   | 84    | 163   | 103   | 223   | 198   | 160   | 142   | 55    | 73    | 72    | 154   | 219   | 114   | 79    | 133   | 117   | 117    | Ephx2   |
| Ephx3   | 42    | 35    | 18    | 31    | 29    | 36    | 25    | 23    | 16    | 12    | 22    | 14    | 7     | 17    | 30    | 47    | 24    | 40    | 37    | 33    | 29    | 13    | 25    | 7     | 22    | 11    | 16    | 14     | Ephx3   |
| Ephx4   | 105   | 79    | 106   | 116   | 137   | 128   | 120   | 53    | 64    | 56    | 51    | 29    | 58    | 37    | 123   | 118   | 129   | 113   | 97    | 117   | 137   | 53    | 68    | 50    | 49    | 41    | 23    | 26     | Ephx4   |
| Epm2a   | 1920  | 102   | 131   | 121   | 187   | 170   | 132   | 56    | 614   | 573   | 576   | 470   | 513   | 466   | 141   | 81    | 108   | 152   | 130   | 202   | 139   | 667   | 595   | 431   | 554   | 474   | 549   | 519    | Epm2a   |
| Epm2a1p | 19478 | 16993 | 12239 | 18203 | 17500 | 18930 | 19937 | 20357 | 17692 | 14660 | 16005 | 13810 | 13133 | 13850 | 19969 | 18761 | 14207 | 19220 | 16472 | 20344 | 19673 | 17779 | 17248 | 13004 | 16184 | 9457  | 14473 | 13003  |         |



|         |       |       |       |       |       |       |       |       |       |       |       |       |       |       |       |       |       |       |       |       |       |       |       |       |       |       |       |       |         |        |
|---------|-------|-------|-------|-------|-------|-------|-------|-------|-------|-------|-------|-------|-------|-------|-------|-------|-------|-------|-------|-------|-------|-------|-------|-------|-------|-------|-------|-------|---------|--------|
| Etnppl  | 3     | 1     | 0     | 0     | 1     | 0     | 0     | 0     | 2     | 5     | 1     | 2     | 0     | 0     | 4     | 4     | 0     | 0     | 0     | 0     | 0     | 2     | 3     | 2     | 0     | 2     | 0     | 0     | Etnppl  |        |
| Ets1    | 3512  | 2584  | 3604  | 2668  | 2779  | 2627  | 2445  | 2976  | 3247  | 3308  | 4057  | 3257  | 3958  | 3256  | 3067  | 4054  | 2764  | 2992  | 2325  | 2552  | 2563  | 3542  | 3717  | 3315  | 3263  | 3571  | 3443  | 3210  | Ets1    |        |
| Ets2    | 2799  | 2682  | 2787  | 2498  | 2383  | 2571  | 1850  | 3131  | 4575  | 4222  | 5292  | 2154  | 3826  | 2348  | 2665  | 3155  | 2341  | 2605  | 1901  | 1710  | 1861  | 3838  | 4739  | 3603  | 2678  | 3446  | 2386  | 2337  | Ets2    |        |
| EtV1    | 2398  | 1760  | 1755  | 2115  | 2544  | 2352  | 2779  | 2315  | 2726  | 2219  | 2678  | 2708  | 1999  | 2792  | 2223  | 2053  | 2044  | 2165  | 2249  | 2300  | 2190  | 2480  | 2420  | 2344  | 2494  | 2714  | 2085  | 2047  | EtV1    |        |
| EtV2    | 1     | 2     | 5     | 6     | 2     | 4     | 0     | 0     | 0     | 0     | 2     | 0     | 2     | 0     | 4     | 5     | 13    | 0     | 3     | 0     | 4     | 2     | 0     | 0     | 0     | 0     | 0     | 0     | EtV2    |        |
| EtV3    | 2609  | 2792  | 2877  | 2914  | 2439  | 2480  | 2418  | 2082  | 2425  | 2475  | 2589  | 2563  | 2527  | 2570  | 2288  | 2977  | 2706  | 2847  | 2516  | 2384  | 2386  | 2152  | 2443  | 2495  | 2447  | 2385  | 2445  | 2537  | EtV3    |        |
| EtV3l   | 6     | 6     | 29    | 5     | 18    | 8     | 4     | 17    | 15    | 23    | 16    | 15    | 64    | 1     | 18    | 23    | 30    | 11    | 13    | 20    | 8     | 35    | 16    | 2     | 26    | 7     | 15    | 2     | EtV3l   |        |
| EtV4    | 556   | 470   | 480   | 334   | 362   | 332   | 272   | 470   | 696   | 557   | 744   | 454   | 590   | 437   | 352   | 572   | 422   | 277   | 327   | 321   | 231   | 381   | 514   | 392   | 368   | 799   | 463   | 490   | EtV4    |        |
| EtV5    | 2560  | 2048  | 2164  | 1867  | 1869  | 1629  | 1645  | 1881  | 2576  | 2210  | 2721  | 1858  | 2137  | 1844  | 2003  | 2576  | 1764  | 1888  | 1765  | 1393  | 1415  | 2064  | 2115  | 1716  | 1919  | 2312  | 1507  | 1718  | EtV5    |        |
| EtV6    | 2232  | 2008  | 2886  | 2655  | 2608  | 2366  | 2199  | 2326  | 2630  | 2632  | 2700  | 3483  | 2969  | 3004  | 2114  | 2121  | 2780  | 2355  | 2486  | 1784  | 2163  | 2386  | 2242  | 2860  | 2545  | 3393  | 3041  | 3252  | EtV6    |        |
| Eva1a   | 164   | 109   | 88    | 71    | 68    | 82    | 47    | 123   | 140   | 135   | 135   | 117   | 121   | 88    | 112   | 129   | 81    | 67    | 67    | 53    | 47    | 67    | 147   | 135   | 47    | 185   | 78    | 70    | Eva1a   |        |
| Eva1b   | 353   | 450   | 384   | 254   | 217   | 280   | 135   | 423   | 653   | 510   | 752   | 362   | 562   | 358   | 328   | 484   | 313   | 291   | 194   | 180   | 161   | 436   | 744   | 470   | 413   | 571   | 481   | 430   | Eva1b   |        |
| Eva1c   | 96    | 122   | 85    | 131   | 86    | 123   | 113   | 54    | 115   | 146   | 95    | 122   | 65    | 116   | 96    | 81    | 93    | 108   | 122   | 117   | 116   | 80    | 105   | 131   | 107   | 128   | 101   | 96    | Eva1c   |        |
| Evc     | 3713  | 3439  | 2892  | 2567  | 2392  | 2936  | 2342  | 2639  | 3145  | 2748  | 2952  | 3022  | 3046  | 2872  | 2864  | 3434  | 2566  | 2474  | 2725  | 2219  | 2356  | 2094  | 2854  | 2884  | 2550  | 3029  | 3168  | 2976  | Evc     |        |
| Evc2    | 1326  | 1245  | 1403  | 1062  | 936   | 984   | 792   | 1373  | 1794  | 1558  | 1958  | 1536  | 1674  | 1603  | 1011  | 1319  | 1096  | 914   | 928   | 943   | 795   | 1250  | 1817  | 1781  | 1443  | 1866  | 1684  | 1584  | Evc2    |        |
| Evi2    | 0     | 1     | 0     | 0     | 1     | 0     | 2     | 1     | 2     | 1     | 3     | 4     | 2     | 1     | 3     | 0     | 0     | 0     | 0     | 0     | 2     | 3     | 6     | 2     | 1     | 3     | 3     | 3     | Evi2    |        |
| Evi2a   | 29    | 32    | 27    | 20    | 32    | 35    | 48    | 70    | 69    | 44    | 79    | 54    | 61    | 54    | 47    | 50    | 24    | 32    | 26    | 53    | 36    | 74    | 96    | 73    | 38    | 84    | 45    | 71    | Evi2a   |        |
| Evi5    | 6202  | 4867  | 4630  | 4638  | 5240  | 5294  | 5396  | 6539  | 6112  | 5487  | 6242  | 5479  | 6424  | 5852  | 6129  | 5842  | 4624  | 4978  | 4521  | 5281  | 4979  | 5631  | 6090  | 5087  | 5502  | 4885  | 5671  | 5677  | Evi5    |        |
| Evi5l   | 7288  | 8696  | 8352  | 10674 | 11241 | 10070 | 9997  | 5407  | 6114  | 7408  | 6713  | 6469  | 5955  | 6150  | 7117  | 7531  | 9608  | 10634 | 10926 | 8832  | 10324 | 8245  | 5685  | 6992  | 7676  | 5045  | 5459  | 5806  | Evi5l   |        |
| Evl     | 10142 | 11872 | 14742 | 17622 | 17652 | 15150 | 15036 | 12643 | 13716 | 19588 | 15537 | 17623 | 13375 | 17150 | 9945  | 9852  | 16478 | 16512 | 18561 | 13171 | 17567 | 17794 | 13652 | 19087 | 19184 | 18048 | 14162 | 15612 | Evl     |        |
| Evp1    | 208   | 244   | 220   | 140   | 111   | 222   | 89    | 325   | 517   | 313   | 262   | 176   | 239   | 165   | 167   | 239   | 117   | 198   | 98    | 76    | 75    | 125   | 562   | 354   | 89    | 142   | 216   | 225   | Evp1    |        |
| Evx1    | 13    | 73    | 22    | 66    | 137   | 94    | 15    | 228   | 185   | 202   | 210   | 56    | 456   | 33    | 80    | 90    | 75    | 42    | 64    | 54    | 33    | 234   | 159   | 47    | 114   | 0     | 38    | 36    | Evx1    |        |
| Evx2    | 68    | 119   | 209   | 167   | 305   | 252   | 55    | 458   | 398   | 411   | 376   | 257   | 772   | 225   | 228   | 228   | 286   | 133   | 252   | 217   | 122   | 513   | 311   | 115   | 325   | 0     | 292   | 312   | Evx2    |        |
| Ewrs1   | 31910 | 33022 | 33519 | 31687 | 30540 | 31992 | 31947 | 39034 | 39962 | 40178 | 40641 | 45334 | 42710 | 46486 | 30956 | 30767 | 34128 | 31002 | 32028 | 30255 | 36639 | 38341 | 45148 | 42495 | 48807 | 46502 | 44391 | Ewrs1 |         |        |
| Exd1    | 153   | 178   | 172   | 205   | 147   | 110   | 108   | 95    | 95    | 93    | 89    | 64    | 99    | 71    | 171   | 200   | 168   | 122   | 110   | 113   | 118   | 85    | 87    | 69    | 79    | 61    | 85    | 82    | Exd1    |        |
| Exd2    | 5488  | 5313  | 5129  | 5794  | 5881  | 5737  | 6586  | 5334  | 4780  | 4812  | 4702  | 5167  | 4657  | 5325  | 5350  | 4594  | 5588  | 5910  | 6114  | 5990  | 6331  | 5989  | 4538  | 5225  | 5189  | 4425  | 4912  | 5035  | Exd2    |        |
| Exo1    | 4788  | 4292  | 3777  | 3044  | 2318  | 2773  | 3349  | 2715  | 2750  | 2489  | 2268  | 4062  | 3598  | 3946  | 3964  | 3816  | 3413  | 2670  | 3068  | 3474  | 2901  | 1659  | 2211  | 2912  | 2627  | 4370  | 4092  | 4195  | Exo1    |        |
| Exo5    | 2217  | 2413  | 2648  | 2303  | 2187  | 2197  | 2413  | 2499  | 2281  | 2359  | 2232  | 2640  | 2406  | 2795  | 2202  | 2197  | 2542  | 2298  | 2220  | 2334  | 2332  | 2236  | 2250  | 2484  | 2409  | 2938  | 2581  | 2762  | Exo5    |        |
| Exoc1   | 8506  | 7958  | 6245  | 6804  | 7616  | 8419  | 8320  | 8617  | 7810  | 6930  | 6570  | 7579  | 7274  | 7740  | 8558  | 7394  | 6639  | 6519  | 6916  | 8745  | 7870  | 7072  | 7279  | 6587  | 7665  | 6352  | 7940  | 7340  | Exoc1   |        |
| Exoc2   | 5173  | 4560  | 4137  | 4300  | 4948  | 4755  | 4967  | 6132  | 5820  | 5567  | 5150  | 5614  | 5033  | 5534  | 5110  | 4995  | 4233  | 4365  | 4434  | 5233  | 4929  | 5893  | 5737  | 4962  | 5858  | 4960  | 5599  | 5478  | Exoc2   |        |
| Exoc3   | 7605  | 7779  | 6459  | 7054  | 7690  | 8116  | 8204  | 11372 | 9884  | 9128  | 8810  | 9305  | 8539  | 9456  | 8300  | 6574  | 6837  | 7531  | 7613  | 8409  | 8223  | 10099 | 9583  | 8929  | 9961  | 8676  | 9541  | 9172  | Exoc3   |        |
| Exoc3l  | 298   | 328   | 400   | 321   | 344   | 319   | 273   | 265   | 322   | 401   | 394   | 421   | 479   | 328   | 290   | 329   | 378   | 353   | 415   | 319   | 317   | 344   | 384   | 462   | 467   | 498   | 492   | 434   | Exoc3l  |        |
| Exoc3i2 | 116   | 133   | 146   | 77    | 89    | 61    | 61    | 153   | 166   | 144   | 190   | 164   | 187   | 163   | 104   | 144   | 127   | 99    | 76    | 77    | 63    | 179   | 151   | 176   | 109   | 223   | 180   | 157   | Exoc3i2 |        |
| Exoc3i4 | 104   | 145   | 132   | 89    | 57    | 123   | 44    | 122   | 208   | 139   | 206   | 123   | 174   | 98    | 116   | 181   | 112   | 145   | 54    | 51    | 45    | 109   | 274   | 135   | 90    | 127   | 142   | 90    | Exoc3i4 |        |
| Exoc4   | 9862  | 10138 | 7867  | 8406  | 8779  | 9107  | 9441  | 10148 | 9249  | 8819  | 8148  | 9652  | 8468  | 9279  | 10006 | 8379  | 8255  | 8644  | 8911  | 9651  | 9628  | 9102  | 9550  | 8811  | 9211  | 8006  | 9477  | 8816  | Exoc4   |        |
| Exoc5   | 13547 | 10253 | 14370 | 12952 | 12523 | 13905 | 14762 | 12684 | 9887  | 10126 | 10666 | 12211 | 11691 | 13244 | 14844 | 12182 | 12543 | 12513 | 12402 | 13813 | 14006 | 12830 | 10016 | 10920 | 11959 | 11282 | 12998 | 13540 | Exoc5   |        |
| Exoc6   | 834   | 676   | 650   | 717   | 848   | 752   | 935   | 1446  | 1458  | 1253  | 1330  | 1191  | 1175  | 1161  | 829   | 794   | 555   | 769   | 757   | 956   | 881   | 1435  | 1478  | 1152  | 1318  | 1207  | 1176  | 1127  | Exoc6   |        |
| Exoc6b  | 6100  | 6001  | 4187  | 4984  | 6130  | 5937  | 5519  | 7746  | 7349  | 7055  | 6368  | 6143  | 6101  | 6144  | 6407  | 5523  | 4647  | 5138  | 5584  | 6112  | 6103  | 7426  | 7268  | 6207  | 7158  | 4774  | 6335  | 5946  | Exoc6b  |        |
| Exoc7   | 5366  | 6811  | 5992  | 6663  | 6424  | 6168  | 6127  | 5113  | 5930  | 6121  | 5629  | 6298  | 5811  | 5786  | 5338  | 5608  | 6163  | 6415  | 7057  | 5839  | 6407  | 6106  | 5812  | 6105  | 6584  | 5740  | 5828  | 5619  | Exoc7   |        |
| Exoc8   | 2070  | 2122  | 2047  | 2372  | 2203  | 2253  | 2289  | 1860  | 1761  | 1962  | 1819  | 1831  | 1863  | 1892  | 2131  | 2029  | 2123  | 2422  | 2255  | 1997  | 2242  | 2074  | 1835  | 1910  | 2028  | 1686  | 2006  | 1876  | Exoc8   |        |
| Exog    | 2555  | 3029  | 2410  | 2874  | 3090  | 2915  | 2970  | 2895  | 2767  | 2684  | 2565  | 2735  | 2590  | 2389  | 2734  | 2676  | 2896  | 2999  | 3023  | 2969  | 3176  | 2874  | 2471  | 2598  | 3031  | 2786  | 2624  | 2699  | Exog    |        |
| Exos1   | 1893  | 1923  | 1835  | 1778  | 1483  | 1722  | 1818  | 1666  | 1564  | 1492  | 1667  | 1819  | 1639  | 1861  | 1863  | 1798  | 1773  | 1672  | 1688  | 1945  | 1661  | 1335  | 1488  | 1686  | 1715  | 2012  | 1839  | 1917  | Exos1   |        |
| Exosc10 | 2772  | 3140  | 2924  | 2599  | 3130  | 2910  | 2857  | 6859  | 7210  | 6517  | 6833  | 6963  | 6389  | 6874  | 2756  | 2657  | 2734  | 2683  | 3127  | 3095  | 2851  | 6196  | 7146  | 6753  | 6819  | 7422  | 7053  | 6897  | Exosc10 |        |
| Exosc2  | 3294  | 3286  | 3638  | 3241  | 2586  | 2640  | 2843  | 2606  | 2658  | 2660  | 2635  | 3086  | 2919  | 3120  | 2865  | 2891  | 3301  | 2889  | 2992  | 2747  | 2985  | 2314  | 2515  | 2956  | 2928  | 3858  | 3428  | 3652  | Exosc2  |        |
| Exosc3  | 1437  | 1458  | 1945  | 1582  | 1213  | 1367  | 1383  | 1330  | 1213  | 1441  | 1518  | 1950  | 1683  | 1999  | 1295  | 1378  | 1663  | 1362  | 1451  | 1411  | 1326  | 1084  | 1262  | 1867  | 1620  | 2299  | 1956  | 2090  | Exosc3  |        |
| Exosc4  | 1211  | 1275  | 1281  | 1164  | 1204  | 1191  | 1190  | 1108  | 1245  | 1268  | 1246  | 1395  | 1440  | 1422  | 1127  | 1053  | 1233  | 1272  | 1326  | 1102  | 1180  | 1180  | 1153  | 1251  | 1426  | 1395  | 1672  | 1384  | 1441    | Exosc4 |
| Exosc5  | 1132  | 1276  | 1219  | 1327  | 1229  | 1225  | 1174  | 845   | 1009  | 991   | 1024  | 1072  | 1171  | 1063  | 1017  | 1111  | 1096  | 1354  | 1275  | 1133  | 1221  | 926   | 999   | 1140  | 1096  | 1260  | 1112  | 1114  | Exosc5  |        |
| Exosc7  | 1677  | 1639  | 1929  | 1703  | 1471  | 1366  | 1454  | 2132  | 1987  | 1909  | 1901  | 2337  | 2045  | 2371  | 1607  | 1503  | 1811  | 1417  | 1479  | 1736  | 1383  | 1529  | 1894  | 2197  |       |       |       |       |         |        |

|               |       |       |       |       |       |       |       |       |       |       |       |       |       |       |       |       |       |       |       |       |       |       |       |       |       |       |       |         |               |        |
|---------------|-------|-------|-------|-------|-------|-------|-------|-------|-------|-------|-------|-------|-------|-------|-------|-------|-------|-------|-------|-------|-------|-------|-------|-------|-------|-------|-------|---------|---------------|--------|
| F830016B08Rik | 14    | 3     | 0     | 0     | 4     | 4     | 1     | 9     | 12    | 11    | 21    | 9     | 1     | 4     | 8     | 13    | 0     | 3     | 5     | 9     | 6     | 2     | 26    | 11    | 2     | 1     | 2     | 6       | F830016B08Rik |        |
| F830045P16Rik | 0     | 0     | 0     | 0     | 0     | 0     | 0     | 2     | 2     | 2     | 0     | 1     | 0     | 2     | 0     | 0     | 0     | 0     | 1     | 0     | 0     | 0     | 5     | 2     | 0     | 1     | 0     | 0       | F830045P16Rik |        |
| F8a           | 512   | 605   | 476   | 616   | 646   | 578   | 506   | 722   | 636   | 574   | 593   | 626   | 540   | 644   | 550   | 378   | 618   | 546   | 620   | 654   | 613   | 810   | 695   | 651   | 711   | 594   | 599   | 628     | F8a           |        |
| F9            | 0     | 0     | 0     | 0     | 1     | 1     | 1     | 1     | 2     | 0     | 0     | 0     | 7     | 0     | 4     | 0     | 2     | 4     | 0     | 0     | 3     | 2     | 1     | 0     | 2     | 0     | 1     | 1       | F9            |        |
| Fa2h          | 17    | 20    | 15    | 15    | 24    | 6     | 3     | 0     | 13    | 14    | 6     | 3     | 1     | 2     | 17    | 19    | 7     | 12    | 8     | 9     | 4     | 17    | 8     | 2     | 10    | 3     | 0     | 1       | Fa2h          |        |
| Faah          | 456   | 451   | 489   | 571   | 680   | 527   | 434   | 622   | 594   | 711   | 664   | 424   | 489   | 408   | 427   | 382   | 474   | 509   | 579   | 533   | 511   | 774   | 590   | 558   | 663   | 466   | 331   | 360     | Faah          |        |
| Faap100       | 2096  | 2973  | 2412  | 3133  | 3349  | 2889  | 2746  | 2324  | 3015  | 3174  | 3062  | 3116  | 2807  | 2452  | 1990  | 2516  | 3153  | 3458  | 3419  | 2507  | 3028  | 3578  | 2926  | 3114  | 3330  | 2964  | 2652  | 2593    | Faap100       |        |
| Faap20        | 1047  | 1392  | 1236  | 1096  | 1203  | 1142  | 1079  | 1481  | 1812  | 1724  | 1723  | 2032  | 1947  | 1916  | 1172  | 1216  | 1329  | 1033  | 1247  | 1122  | 1002  | 1688  | 1779  | 2084  | 1773  | 2276  | 2206  | 1997    | Faap20        |        |
| Faap24        | 550   | 728   | 735   | 641   | 539   | 546   | 682   | 415   | 519   | 610   | 499   | 648   | 586   | 668   | 554   | 576   | 673   | 622   | 644   | 619   | 606   | 533   | 509   | 609   | 582   | 656   | 540   | 714     | Faap24        |        |
| Fabp1         | 1     | 0     | 0     | 0     | 0     | 0     | 0     | 0     | 1     | 0     | 0     | 0     | 0     | 0     | 0     | 0     | 0     | 0     | 0     | 0     | 0     | 0     | 0     | 0     | 0     | 0     | 0     | 0       | 0             | Fabp1  |
| Fabp12        | 0     | 1     | 0     | 0     | 0     | 0     | 0     | 0     | 0     | 0     | 1     | 0     | 0     | 2     | 7     | 1     | 0     | 0     | 2     | 0     | 0     | 0     | 0     | 0     | 0     | 0     | 0     | 0       | 0             | Fabp12 |
| Fabp2         | 2     | 0     | 0     | 0     | 0     | 0     | 0     | 1     | 0     | 0     | 0     | 0     | 0     | 0     | 3     | 0     | 0     | 0     | 0     | 0     | 0     | 0     | 1     | 0     | 0     | 0     | 0     | 0       | 0             | Fabp2  |
| Fabp3         | 315   | 448   | 376   | 557   | 830   | 611   | 686   | 813   | 880   | 893   | 935   | 468   | 606   | 598   | 497   | 409   | 520   | 627   | 662   | 798   | 740   | 916   | 949   | 690   | 923   | 408   | 572   | 517     | Fabp3         |        |
| Fabp4         | 12    | 6     | 6     | 4     | 18    | 23    | 0     | 16    | 30    | 20    | 89    | 8     | 10    | 22    | 11    | 12    | 16    | 10    | 3     | 6     | 3     | 42    | 104   | 14    | 58    | 8     | 7     | 7       | Fabp4         |        |
| Fabp5         | 8973  | 9902  | 9455  | 8921  | 9826  | 9448  | 11260 | 15382 | 13319 | 12679 | 11575 | 13739 | 13797 | 17981 | 10566 | 8413  | 9739  | 8382  | 10236 | 12608 | 10973 | 12617 | 13780 | 14101 | 15141 | 15409 | 14985 | 15756   | Fabp5         |        |
| Fabp6         | 0     | 0     | 0     | 1     | 0     | 0     | 1     | 0     | 0     | 0     | 0     | 0     | 0     | 0     | 0     | 0     | 2     | 0     | 0     | 1     | 1     | 0     | 0     | 0     | 0     | 0     | 0     | 0       | 0             | Fabp6  |
| Fabp7         | 13848 | 15034 | 18292 | 19145 | 26685 | 20151 | 24334 | 34377 | 24822 | 27402 | 22046 | 26079 | 27525 | 30060 | 23241 | 15990 | 20002 | 19979 | 22078 | 27037 | 23920 | 31885 | 27356 | 25759 | 29274 | 25078 | 26435 | 30787   | Fabp7         |        |
| Fadd          | 1096  | 1102  | 1105  | 978   | 862   | 922   | 944   | 730   | 891   | 811   | 854   | 987   | 1000  | 1095  | 893   | 917   | 1079  | 869   | 904   | 795   | 913   | 744   | 801   | 980   | 887   | 1166  | 1025  | 993     | Fadd          |        |
| Fads1         | 12547 | 13160 | 14639 | 13612 | 14280 | 13486 | 14549 | 12438 | 11973 | 13970 | 12221 | 16457 | 14982 | 16674 | 12531 | 12375 | 14366 | 13528 | 14860 | 11867 | 14386 | 15002 | 11622 | 14787 | 15040 | 17821 | 15076 | 18041   | Fads1         |        |
| Fads2         | 8966  | 10902 | 12595 | 10177 | 11154 | 10960 | 10150 | 14332 | 13876 | 15769 | 13102 | 19668 | 17585 | 18269 | 9361  | 9209  | 11375 | 9700  | 11853 | 9459  | 10284 | 16665 | 13023 | 16679 | 17485 | 20719 | 25296 | 19944   | Fads2         |        |
| Fads2b        | 18    | 11    | 3     | 0     | 10    | 6     | 6     | 29    | 40    | 35    | 19    | 2     | 5     | 4     | 7     | 8     | 6     | 4     | 12    | 1     | 5     | 7     | 45    | 18    | 1     | 4     | 6     | 0       | Fads2b        |        |
| Fads3         | 1127  | 1268  | 1164  | 1020  | 1301  | 1186  | 884   | 998   | 1298  | 1130  | 1270  | 784   | 1055  | 741   | 1292  | 1605  | 1002  | 1188  | 955   | 794   | 984   | 1365  | 1485  | 865   | 1074  | 789   | 745   | 752     | Fads3         |        |
| Fads6         | 125   | 150   | 103   | 115   | 228   | 199   | 139   | 182   | 225   | 188   | 226   | 153   | 193   | 159   | 125   | 159   | 176   | 205   | 188   | 143   | 136   | 251   | 181   | 164   | 218   | 219   | 144   | 170     | Fads6         |        |
| Faf1          | 6369  | 5897  | 5831  | 5089  | 5366  | 5517  | 6031  | 6451  | 5706  | 5071  | 4749  | 5495  | 4966  | 5380  | 6596  | 5713  | 5522  | 5330  | 5712  | 6019  | 5667  | 5743  | 5398  | 4913  | 5175  | 5413  | 5463  | 5974    | Faf1          |        |
| Faf2          | 5012  | 4964  | 5311  | 4979  | 4763  | 5111  | 4906  | 5854  | 5988  | 6220  | 6234  | 6570  | 6405  | 6635  | 4838  | 4662  | 5223  | 4875  | 5002  | 4428  | 5200  | 6156  | 6026  | 6416  | 6248  | 6476  | 6365  | 6679    | Faf2          |        |
| Fah           | 326   | 385   | 349   | 326   | 383   | 441   | 273   | 286   | 370   | 315   | 257   | 293   | 319   | 292   | 334   | 390   | 289   | 344   | 303   | 343   | 368   | 351   | 349   | 254   | 283   | 200   | 325   | 274     | Fah           |        |
| Fahd1         | 599   | 569   | 711   | 532   | 538   | 578   | 634   | 867   | 779   | 781   | 738   | 835   | 904   | 958   | 665   | 566   | 699   | 565   | 553   | 659   | 569   | 698   | 851   | 848   | 696   | 984   | 890   | 1034    | Fahd1         |        |
| Fahd2a        | 653   | 607   | 552   | 570   | 699   | 672   | 653   | 728   | 859   | 730   | 733   | 887   | 847   | 744   | 734   | 621   | 567   | 622   | 609   | 675   | 584   | 799   | 777   | 758   | 871   | 849   | 820   | 813     | Fahd2a        |        |
| Faim          | 3325  | 3054  | 3069  | 3429  | 2663  | 2931  | 3197  | 2003  | 1945  | 2149  | 1992  | 2287  | 2214  | 2431  | 3144  | 3049  | 3212  | 3346  | 2834  | 3103  | 3373  | 21918 | 1865  | 2207  | 2314  | 2315  | 2359  | 2517    | Faim          |        |
| Faim2         | 225   | 338   | 282   | 467   | 875   | 662   | 658   | 352   | 399   | 468   | 411   | 243   | 209   | 214   | 319   | 311   | 458   | 607   | 778   | 673   | 802   | 662   | 405   | 297   | 399   | 178   | 180   | 182     | Faim2         |        |
| Faiml         | 0     | 0     | 0     | 0     | 0     | 0     | 2     | 0     | 0     | 0     | 0     | 0     | 0     | 0     | 0     | 0     | 0     | 0     | 0     | 0     | 0     | 0     | 0     | 0     | 0     | 0     | 0     | 0       | 0             | Faiml  |
| Fam102a       | 2630  | 3278  | 2927  | 3106  | 2665  | 2478  | 2282  | 1557  | 1907  | 1944  | 1985  | 1757  | 1957  | 1642  | 2223  | 3162  | 2931  | 3323  | 2670  | 2029  | 2332  | 1935  | 1750  | 1856  | 1619  | 2026  | 1550  | 1696    | Fam102a       |        |
| Fam102b       | 7127  | 6013  | 7257  | 7601  | 9697  | 8591  | 8872  | 5754  | 5494  | 5771  | 6370  | 4730  | 5159  | 4683  | 7913  | 6981  | 7409  | 8548  | 7848  | 7725  | 8737  | 6769  | 5741  | 4749  | 5650  | 3482  | 4915  | 4810    | Fam102b       |        |
| Fam104a       | 3351  | 3681  | 3620  | 3696  | 3014  | 3366  | 3462  | 2144  | 2159  | 2210  | 2205  | 2512  | 2275  | 2657  | 3377  | 3116  | 3546  | 3350  | 3511  | 3360  | 3398  | 2164  | 2235  | 2546  | 2391  | 2760  | 2388  | 2633    | Fam104a       |        |
| Fam107a       | 223   | 116   | 65    | 137   | 72    | 54    | 46    | 473   | 382   | 503   | 448   | 172   | 270   | 165   | 178   | 178   | 76    | 66    | 55    | 58    | 52    | 187   | 496   | 529   | 150   | 708   | 93    | 173     | Fam107a       |        |
| Fam107b       | 8033  | 6668  | 6646  | 6492  | 6454  | 6762  | 7082  | 5898  | 4876  | 4668  | 4615  | 5207  | 5049  | 5443  | 7834  | 7244  | 6306  | 6688  | 6604  | 6787  | 6774  | 5152  | 4829  | 5079  | 5280  | 5576  | 5173  | 5400    | Fam107b       |        |
| Fam110a       | 1701  | 2431  | 2873  | 2820  | 2375  | 2072  | 1973  | 1388  | 1637  | 1971  | 1630  | 2817  | 2226  | 2205  | 1896  | 2088  | 3202  | 2523  | 2839  | 1928  | 2169  | 1927  | 1529  | 2366  | 2178  | 2865  | 2494  | 2593    | Fam110a       |        |
| Fam110b       | 1696  | 1774  | 1630  | 2393  | 2844  | 2282  | 2511  | 2164  | 2374  | 2364  | 2345  | 2123  | 1801  | 1950  | 1762  | 1513  | 2055  | 2203  | 2685  | 2179  | 2634  | 2458  | 2287  | 2460  | 2495  | 2180  | 1833  | 1928    | Fam110b       |        |
| Fam110c       | 87    | 24    | 15    | 14    | 16    | 29    | 17    | 9     | 20    | 12    | 16    | 3     | 3     | 55    | 46    | 25    | 11    | 15    | 12    | 9     | 2     | 28    | 5     | 3     | 8     | 6     | 2     | Fam110c |               |        |
| Fam110d       | 156   | 194   | 176   | 107   | 125   | 133   | 97    | 129   | 180   | 175   | 170   | 130   | 147   | 163   | 137   | 216   | 194   | 142   | 145   | 164   | 104   | 167   | 216   | 154   | 187   | 204   | 186   | 116     | Fam110d       |        |
| Fam111a       | 6774  | 5854  | 6453  | 4823  | 3880  | 4143  | 4636  | 3483  | 3470  | 2816  | 3168  | 3632  | 3661  | 3374  | 7338  | 6743  | 5569  | 4792  | 3858  | 5726  | 4131  | 2832  | 3505  | 3064  | 2848  | 4289  | 3905  | 3846    | Fam111a       |        |
| Fam114a1      | 1574  | 1484  | 1453  | 954   | 721   | 1320  | 581   | 1642  | 2363  | 1716  | 2987  | 1455  | 2125  | 1474  | 1706  | 1988  | 1109  | 1165  | 592   | 701   | 525   | 1995  | 3141  | 1631  | 1606  | 1703  | 1879  | 1663    | Fam114a1      |        |
| Fam114a2      | 5230  | 5162  | 5005  | 5398  | 5434  | 5162  | 5742  | 6962  | 5909  | 6239  | 5876  | 5950  | 5971  | 6391  | 5640  | 4668  | 5532  | 5510  | 5487  | 5659  | 5611  | 6545  | 5998  | 6464  | 6235  | 6307  | 6236  | 6271    | Fam114a2      |        |
| Fam117a       | 2577  | 2858  | 2217  | 2011  | 1289  | 1681  | 1431  | 568   | 770   | 620   | 776   | 707   | 1088  | 617   | 2080  | 2732  | 2062  | 1942  | 1554  | 1477  | 1483  | 481   | 849   | 672   | 483   | 801   | 700   | 881     | Fam117a       |        |
| Fam117b       | 7951  | 7092  | 9027  | 11828 | 13689 | 12159 | 13000 | 8348  | 7556  | 9643  | 8500  | 7708  | 7389  | 8052  | 8517  | 7782  | 10476 | 12661 | 12806 | 10346 | 12964 | 11658 | 7270  | 8342  | 10292 | 6501  | 7248  | 7361    | Fam117b       |        |
| Fam118a       | 2550  | 2362  | 2892  | 2320  | 2095  | 2029  | 2445  | 1369  | 1388  | 1507  | 1543  | 1637  | 1669  | 1442  | 2625  | 2438  | 2349  | 2432  | 2205  | 2336  | 2373  | 1464  | 1558  | 1550  | 1527  | 1780  | 1598  | 1722    | Fam118a       |        |
| Fam118b       | 4615  | 4218  | 3974  | 3895  | 3414  | 3879  | 4478  | 3460  | 2781  | 2693  | 2401  | 3078  | 2596  | 3168  | 4912  | 14058 | 3771  | 3916  | 3818  | 4527  | 4162  | 2769  | 2804  | 2910  | 2952  | 3332  | 2888  | 3294    | Fam118b       |        |
| Fam120a       | 14282 | 13205 | 15336 | 14273 | 14715 | 15027 | 15090 | 12324 | 13748 | 13369 | 15357 | 14123 | 14352 | 13332 | 14620 | 14504 | 15207 | 14664 | 12608 | 14519 | 13059 | 13819 | 14468 | 14288 | 14888 | 13856 | 13175 | 14182   | Fam120a       |        |
| Fam120b       | 7393  | 8000  | 5654  | 6631  | 6509  | 6776  | 6767  | 6324  | 6214  | 5297  | 5495  | 5197  | 5281  | 5216  | 8043  | 6873  | 6442  | 6528  | 6470  | 7511  | 7117  | 5760  | 6175  | 5033  | 5821  | 4983  | 5431  | 5283    | Fam120b       |        |
| Fam120c       | 2234  | 2086  | 13    |       |       |       |       |       |       |       |       |       |       |       |       |       |       |       |       |       |       |       |       |       |       |       |       |         |               |        |



|          |       |       |       |       |       |       |       |       |       |       |       |       |       |       |       |       |       |       |       |       |       |       |       |       |       |       |       |         |          |
|----------|-------|-------|-------|-------|-------|-------|-------|-------|-------|-------|-------|-------|-------|-------|-------|-------|-------|-------|-------|-------|-------|-------|-------|-------|-------|-------|-------|---------|----------|
| Fam162b  | 9     | 15    | 13    | 7     | 12    | 9     | 16    | 24    | 17    | 19    | 26    | 21    | 32    | 19    | 18    | 19    | 15    | 22    | 30    | 25    | 21    | 23    | 16    | 20    | 17    | 30    | 30    | 25      | Fam162b  |
| Fam163a  | 191   | 213   | 426   | 299   | 365   | 313   | 175   | 442   | 279   | 511   | 431   | 646   | 762   | 614   | 244   | 259   | 295   | 283   | 358   | 238   | 334   | 683   | 454   | 458   | 573   | 258   | 738   | 722     | Fam163a  |
| Fam163b  | 27    | 30    | 25    | 72    | 82    | 48    | 73    | 65    | 114   | 86    | 120   | 49    | 37    | 29    | 45    | 47    | 35    | 88    | 44    | 58    | 88    | 112   | 106   | 56    | 73    | 25    | 16    | 38      | Fam163b  |
| Fam166a  | 2     | 6     | 7     | 0     | 2     | 2     | 1     | 0     | 8     | 2     | 7     | 2     | 3     | 10    | 0     | 1     | 6     | 0     | 2     | 2     | 1     | 3     | 5     | 6     | 3     | 17    | 9     | 9       | Fam166a  |
| Fam166b  | 13    | 10    | 21    | 24    | 26    | 19    | 11    | 13    | 19    | 21    | 15    | 23    | 29    | 20    | 11    | 24    | 28    | 28    | 15    | 20    | 19    | 28    | 25    | 16    | 42    | 12    | 28    | 19      | Fam166b  |
| Fam166c  | 5     | 3     | 1     | 0     | 2     | 5     | 6     | 7     | 2     | 12    | 5     | 5     | 6     | 0     | 1     | 9     | 1     | 3     | 1     | 0     | 2     | 5     | 14    | 3     | 2     | 1     | 0     | 0       | Fam166c  |
| Fam167a  | 1430  | 1621  | 1580  | 1722  | 1910  | 1784  | 2123  | 1599  | 1396  | 1539  | 1295  | 2255  | 1531  | 2090  | 1593  | 1209  | 1882  | 1787  | 2058  | 1936  | 1925  | 1828  | 1447  | 1933  | 1968  | 2304  | 1829  | 2308    | Fam167a  |
| Fam167b  | 20    | 21    | 34    | 11    | 12    | 15    | 6     | 48    | 40    | 40    | 69    | 27    | 39    | 12    | 13    | 15    | 12    | 13    | 7     | 21    | 9     | 52    | 64    | 37    | 23    | 40    | 21    | 31      | Fam167b  |
| Fam168a  | 11871 | 11419 | 9778  | 13934 | 18090 | 16197 | 17308 | 17062 | 17254 | 20448 | 18272 | 18111 | 16519 | 18407 | 11786 | 10491 | 12843 | 15298 | 16745 | 14412 | 17660 | 20610 | 15771 | 18011 | 20936 | 13482 | 16270 | 17022   | Fam168a  |
| Fam168b  | 20515 | 19428 | 22475 | 24213 | 26549 | 24637 | 23688 | 30229 | 30447 | 34308 | 31597 | 39679 | 34033 | 36670 | 20505 | 19090 | 24156 | 24652 | 27041 | 32524 | 24279 | 13555 | 27934 | 37049 | 39229 | 37285 | 37700 | 36555   | Fam168b  |
| Fam169a  | 1821  | 1430  | 1689  | 1868  | 2528  | 2190  | 2306  | 3152  | 2730  | 2683  | 2504  | 2199  | 2606  | 2298  | 2176  | 1780  | 1615  | 1804  | 1972  | 2369  | 2141  | 3641  | 2564  | 2290  | 2918  | 1845  | 2179  | 2398    | Fam169a  |
| Fam169b  | 51    | 35    | 18    | 26    | 3     | 4     | 2     | 98    | 63    | 120   | 115   | 17    | 29    | 20    | 36    | 48    | 2     | 12    | 5     | 5     | 8     | 111   | 109   | 23    | 126   | 17    | 13    | Fam169b |          |
| Fam170a  | 0     | 0     | 0     | 3     | 1     | 0     | 0     | 0     | 0     | 0     | 0     | 0     | 0     | 0     | 0     | 0     | 0     | 0     | 0     | 0     | 0     | 2     | 0     | 0     | 0     | 0     | 0     | 0       | Fam170a  |
| Fam170b  | 0     | 0     | 2     | 0     | 0     | 0     | 1     | 0     | 0     | 0     | 0     | 0     | 0     | 0     | 0     | 0     | 0     | 2     | 0     | 0     | 1     | 0     | 0     | 0     | 0     | 0     | 0     | 0       | Fam170b  |
| Fam171a1 | 2620  | 2673  | 3241  | 2911  | 4082  | 3385  | 3075  | 5747  | 5590  | 6505  | 6264  | 6467  | 6402  | 5800  | 2730  | 2886  | 3086  | 2943  | 3488  | 2902  | 3184  | 7108  | 5562  | 5490  | 6210  | 5856  | 5832  | 6141    | Fam171a1 |
| Fam171a2 | 3418  | 4415  | 3524  | 4376  | 5239  | 4347  | 4098  | 5483  | 5742  | 6444  | 5609  | 5631  | 4851  | 4688  | 3214  | 3221  | 4743  | 4410  | 5646  | 4281  | 4211  | 6985  | 5429  | 6150  | 6703  | 5463  | 4951  | 4540    | Fam171a2 |
| Fam171b  | 10694 | 9341  | 7889  | 11183 | 12780 | 12104 | 13647 | 12815 | 10061 | 14028 | 9168  | 11059 | 9970  | 11467 | 11813 | 7807  | 10131 | 11574 | 12109 | 12750 | 13391 | 11814 | 8859  | 9801  | 11806 | 8786  | 10885 | 10760   | Fam171b  |
| Fam172a  | 4979  | 4468  | 5299  | 5023  | 4945  | 5209  | 6429  | 5206  | 4549  | 4829  | 4552  | 5862  | 4543  | 6313  | 5595  | 4433  | 5443  | 5113  | 5176  | 4912  | 5768  | 5432  | 4896  | 5112  | 5352  | 5786  | 5480  | 6425    | Fam172a  |
| Fam174a  | 1232  | 963   | 1151  | 1078  | 902   | 918   | 984   | 964   | 945   | 683   | 852   | 685   | 856   | 861   | 1279  | 1097  | 999   | 969   | 948   | 1156  | 1055  | 835   | 1035  | 799   | 851   | 787   | 888   | 824     | Fam174a  |
| Fam174b  | 1827  | 1590  | 1700  | 1515  | 1419  | 1482  | 1060  | 2087  | 2300  | 2128  | 2150  | 2011  | 3354  | 1943  | 1789  | 2101  | 1595  | 1607  | 1213  | 1259  | 1076  | 1885  | 2531  | 2065  | 1894  | 2255  | 2289  | 2187    | Fam174b  |
| Fam174c  | 234   | 277   | 384   | 497   | 301   | 255   | 350   | 271   | 331   | 382   | 419   | 403   | 439   | 471   | 233   | 257   | 400   | 402   | 413   | 245   | 316   | 408   | 315   | 498   | 404   | 396   | 303   | 449     | Fam174c  |
| Fam177a  | 50    | 38    | 28    | 35    | 36    | 28    | 25    | 17    | 31    | 20    | 10    | 14    | 18    | 18    | 37    | 42    | 35    | 22    | 38    | 26    | 47    | 18    | 23    | 12    | 23    | 8     | 19    | 12      | Fam177a  |
| Fam177a2 | 428   | 273   | 284   | 562   | 474   | 497   | 561   | 282   | 223   | 192   | 228   | 205   | 242   | 228   | 406   | 429   | 340   | 495   | 408   | 417   | 518   | 378   | 256   | 225   | 305   | 204   | 235   | 197     | Fam177a2 |
| Fam178b  | 8     | 12    | 12    | 1     | 5     | 12    | 4     | 7     | 16    | 20    | 5     | 7     | 14    | 7     | 5     | 9     | 8     | 8     | 5     | 0     | 7     | 7     | 14    | 16    | 3     | 21    | 9     | 2       | Fam178b  |
| Fam180a  | 1     | 1     | 0     | 0     | 2     | 2     | 2     | 20    | 33    | 26    | 62    | 2     | 6     | 2     | 0     | 1     | 0     | 3     | 1     | 0     | 0     | 25    | 59    | 23    | 19    | 9     | 6     | 5       | Fam180a  |
| Fam181a  | 444   | 539   | 847   | 424   | 327   | 370   | 260   | 398   | 371   | 436   | 290   | 846   | 725   | 789   | 429   | 383   | 610   | 267   | 428   | 487   | 316   | 384   | 471   | 497   | 473   | 705   | 1067  | 989     | Fam181a  |
| Fam181b  | 1517  | 1940  | 2365  | 1827  | 1640  | 1422  | 1667  | 1083  | 1008  | 1304  | 1024  | 1685  | 1474  | 1886  | 1547  | 1233  | 2030  | 1610  | 1893  | 1646  | 1681  | 1101  | 1065  | 1248  | 1212  | 1575  | 1900  | 2147    | Fam181b  |
| Fam183b  | 38    | 60    | 63    | 20    | 43    | 30    | 40    | 72    | 42    | 56    | 52    | 46    | 113   | 55    | 63    | 57    | 37    | 61    | 48    | 90    | 61    | 75    | 65    | 47    | 69    | 37    | 44    | 44      | Fam183b  |
| Fam184a  | 3473  | 3275  | 2537  | 3217  | 3603  | 3669  | 3597  | 2277  | 2074  | 2094  | 1977  | 1771  | 1997  | 1822  | 3589  | 3656  | 2716  | 3371  | 2929  | 3559  | 3611  | 2097  | 2034  | 1487  | 1893  | 1362  | 1758  | 1766    | Fam184a  |
| Fam184b  | 264   | 241   | 221   | 297   | 471   | 419   | 514   | 307   | 416   | 350   | 391   | 390   | 367   | 423   | 222   | 181   | 267   | 361   | 489   | 521   | 466   | 247   | 388   | 431   | 436   | 462   | 350   | 390     | Fam184b  |
| Fam185a  | 1012  | 879   | 937   | 899   | 878   | 787   | 895   | 600   | 611   | 605   | 584   | 440   | 553   | 529   | 951   | 922   | 903   | 922   | 819   | 779   | 856   | 587   | 617   | 565   | 543   | 522   | 546   | 519     | Fam185a  |
| Fam186a  | 8     | 3     | 5     | 10    | 1     | 9     | 2     | 7     | 4     | 3     | 6     | 2     | 5     | 1     | 4     | 11    | 2     | 6     | 1     | 6     | 3     | 3     | 3     | 8     | 0     | 2     | 6     | 2       | Fam186a  |
| Fam186b  | 20    | 25    | 32    | 14    | 29    | 32    | 11    | 22    | 21    | 25    | 16    | 12    | 16    | 12    | 16    | 16    | 21    | 17    | 25    | 15    | 14    | 20    | 19    | 9     | 31    | 11    | 7     | 12      | Fam186b  |
| Fam187a  | 2     | 10    | 9     | 9     | 2     | 1     | 8     | 0     | 3     | 0     | 0     | 5     | 1     | 0     | 12    | 6     | 2     | 9     | 0     | 7     | 1     | 2     | 0     | 0     | 0     | 0     | 6     | 1       | Fam187a  |
| Fam187b  | 35    | 22    | 41    | 39    | 25    | 33    | 25    | 50    | 31    | 43    | 31    | 33    | 37    | 16    | 28    | 21    | 48    | 17    | 18    | 28    | 11    | 12    | 38    | 36    | 26    | 47    | 19    | 18      | Fam187b  |
| Fam189a1 | 490   | 551   | 580   | 942   | 1265  | 936   | 887   | 913   | 1088  | 1258  | 1185  | 951   | 849   | 868   | 572   | 546   | 818   | 974   | 969   | 802   | 921   | 1786  | 1043  | 859   | 1300  | 641   | 718   | 839     | Fam189a1 |
| Fam189a2 | 601   | 860   | 1010  | 718   | 825   | 600   | 577   | 423   | 401   | 495   | 476   | 440   | 558   | 358   | 783   | 823   | 911   | 735   | 749   | 584   | 653   | 695   | 425   | 391   | 487   | 306   | 507   | 351     | Fam189a2 |
| Fam189b  | 1382  | 1928  | 2071  | 1893  | 1991  | 1538  | 1454  | 1551  | 1969  | 2282  | 2310  | 2119  | 2193  | 1803  | 1331  | 1749  | 2121  | 1919  | 1964  | 1405  | 1558  | 2373  | 2001  | 2060  | 2147  | 2320  | 1766  | 1825    | Fam189b  |
| Fam193a  | 4983  | 5454  | 6395  | 6717  | 7112  | 6547  | 6154  | 6642  | 7331  | 8966  | 8075  | 9142  | 7879  | 8922  | 4814  | 5116  | 6538  | 6581  | 7390  | 5076  | 6820  | 8851  | 6987  | 8657  | 8923  | 8440  | 7990  | 7992    | Fam193a  |
| Fam193b  | 7186  | 8637  | 9832  | 10253 | 10247 | 9376  | 8838  | 9266  | 9873  | 11783 | 10696 | 11923 | 10611 | 11111 | 6994  | 8065  | 10607 | 10116 | 10616 | 8385  | 9301  | 11122 | 9135  | 11813 | 12315 | 10837 | 11384 | 10905   | Fam193b  |
| Fam199x  | 5444  | 3528  | 4465  | 4137  | 3959  | 4932  | 4529  | 2947  | 2531  | 2164  | 2530  | 2828  | 2865  | 2776  | 5097  | 4635  | 3946  | 4007  | 3898  | 4898  | 4421  | 2466  | 2247  | 2339  | 2523  | 2492  | 2923  | 2815    | Fam199x  |
| Fam204a  | 2353  | 1939  | 2415  | 2110  | 1915  | 2080  | 2220  | 3407  | 2745  | 2645  | 2783  | 3398  | 3656  | 3540  | 2557  | 2007  | 2173  | 1897  | 2188  | 2671  | 2168  | 2792  | 2844  | 2955  | 3050  | 2764  | 3674  | 3527    | Fam204a  |
| Fam205a1 | 0     | 0     | 0     | 2     | 0     | 0     | 0     | 4     | 2     | 4     | 0     | 0     | 3     | 0     | 0     | 1     | 0     | 1     | 0     | 0     | 0     | 3     | 7     | 0     | 0     | 2     | 1     | 1       | Fam205a1 |
| Fam205a2 | 7     | 3     | 2     | 6     | 5     | 4     | 2     | 0     | 1     | 2     | 1     | 0     | 0     | 0     | 4     | 3     | 2     | 2     | 5     | 2     | 3     | 0     | 3     | 0     | 1     | 0     | 1     | 0       | Fam205a2 |
| Fam205a3 | 5     | 6     | 7     | 8     | 9     | 5     | 6     | 1     | 5     | 3     | 4     | 0     | 3     | 5     | 5     | 12    | 10    | 3     | 6     | 2     | 5     | 5     | 1     | 1     | 7     | 14    | 1     | 1       | Fam205a3 |
| Fam205c  | 3     | 1     | 0     | 0     | 0     | 0     | 1     | 0     | 0     | 0     | 5     | 1     | 0     | 0     | 0     | 1     | 1     | 0     | 2     | 0     | 0     | 0     | 0     | 0     | 0     | 0     | 3     | 0       | Fam205c  |
| Fam207a  | 2155  | 2655  | 2554  | 2655  | 2323  | 2078  | 2081  | 2055  | 2265  | 2420  | 2243  | 2499  | 2279  | 2358  | 1885  | 2300  | 2691  | 2336  | 2340  | 2080  | 2063  | 2075  | 2157  | 2549  | 2336  | 2726  | 2335  | 2346    | Fam207a  |
| Fam207b  | 83    | 94    | 98    | 85    | 83    | 76    | 117   | 37    | 21    | 32    | 29    | 23    | 42    | 35    | 37    | 87    | 115   | 104   | 97    | 89    | 82    | 87    | 43    | 25    | 31    | 39    | 29    | 33      | Fam207b  |
| Fam20a   | 99    | 115   | 109   | 64    | 132   | 86    | 53    | 165   | 185   | 199   | 215   | 166   | 213   | 161   | 79    | 143   | 102   | 113   | 75    | 67    | 87    | 177   | 216   | 171   | 231   | 228   | 222   | 163     | Fam20a   |
| Fam20b   | 5278  | 5005  | 5282  | 5643  | 6242  | 6203  | 6102  | 6421  | 6307  | 6948  | 6999  | 6999  | 6408  | 6249  | 5548  | 5503  | 5490  | 5925  | 6224  | 5485  | 5970  | 7630  | 6462  | 6339  | 7140  | 6012  | 6199  | 6526    | Fam20b   |
| Fam20c   | 1288  | 1508  | 1543  | 2135  | 3216  | 2401  | 2194  | 2365  | 2581  | 3110  | 2669  | 2410  | 2042  | 2260  | 1495  | 1408  | 1942  | 2309  | 2732  | 2156  | 2298  | 3404  | 26    |       |       |       |       |         |          |

|          |       |       |       |       |       |       |       |       |       |       |       |       |       |       |       |       |       |       |       |       |       |       |       |       |       |       |       |       |          |        |
|----------|-------|-------|-------|-------|-------|-------|-------|-------|-------|-------|-------|-------|-------|-------|-------|-------|-------|-------|-------|-------|-------|-------|-------|-------|-------|-------|-------|-------|----------|--------|
| Fam243   | 0     | 0     | 4     | 0     | 7     | 5     | 2     | 6     | 21    | 8     | 6     | 21    | 11    | 2     | 0     | 4     | 0     | 1     | 2     | 7     | 4     | 17    | 29    | 6     | 11    | 0     | 1     | 4     | Fam243   |        |
| Fam24a   | 0     | 0     | 0     | 2     | 0     | 0     | 0     | 0     | 0     | 0     | 0     | 0     | 0     | 0     | 0     | 0     | 0     | 0     | 0     | 0     | 0     | 0     | 0     | 0     | 0     | 0     | 0     | 0     | Fam24a   |        |
| Fam24b   | 18    | 17    | 15    | 47    | 24    | 12    | 23    | 7     | 7     | 5     | 1     | 21    | 7     | 16    | 20    | 14    | 20    | 17    | 16    | 20    | 23    | 12    | 3     | 8     | 11    | 20    | 13    | 13    | Fam24b   |        |
| Fam25c   | 1     | 0     | 3     | 0     | 0     | 0     | 0     | 4     | 2     | 2     | 0     | 1     | 0     | 1     | 0     | 0     | 0     | 0     | 0     | 0     | 0     | 0     | 7     | 0     | 0     | 0     | 0     | 0     | Fam25c   |        |
| Fam32a   | 6001  | 6574  | 5504  | 5859  | 5999  | 6723  | 6634  | 9235  | 8545  | 8571  | 7440  | 7954  | 7510  | 8221  | 6988  | 5585  | 6415  | 6117  | 6636  | 7858  | 6975  | 7705  | 8224  | 8482  | 9558  | 8098  | 8939  | 8325  | Fam32a   |        |
| Fam3a    | 524   | 599   | 545   | 542   | 717   | 615   | 615   | 1221  | 1369  | 1404  | 1424  | 1430  | 1391  | 1442  | 570   | 575   | 645   | 508   | 616   | 621   | 605   | 1375  | 1372  | 1462  | 1432  | 1468  | 1334  | 1358  | Fam3a    |        |
| Fam3b    | 0     | 0     | 0     | 0     | 0     | 0     | 0     | 0     | 0     | 0     | 0     | 0     | 0     | 0     | 0     | 0     | 0     | 0     | 0     | 0     | 0     | 0     | 1     | 0     | 0     | 0     | 0     | 0     | Fam3b    |        |
| Fam3c    | 2532  | 1981  | 2776  | 2308  | 2320  | 2077  | 2221  | 2648  | 2516  | 2600  | 2975  | 2274  | 2352  | 2423  | 2529  | 2442  | 2490  | 2268  | 1976  | 2058  | 1999  | 2732  | 2937  | 2670  | 2570  | 2788  | 2377  | 2534  | Fam3c    |        |
| Fam3d    | 2     | 1     | 0     | 0     | 1     | 1     | 1     | 17    | 17    | 19    | 19    | 2     | 5     | 1     | 0     | 2     | 3     | 0     | 0     | 1     | 3     | 7     | 32    | 25    | 8     | 16    | 2     | 2     | Fam3d    |        |
| Fam43a   | 708   | 974   | 1175  | 1079  | 884   | 821   | 607   | 675   | 819   | 1037  | 1272  | 868   | 1149  | 934   | 736   | 1070  | 1048  | 972   | 778   | 685   | 717   | 894   | 1043  | 1059  | 811   | 1156  | 938   | 852   | Fam43a   |        |
| Fam43b   | 37    | 54    | 40    | 83    | 176   | 113   | 95    | 34    | 42    | 51    | 31    | 12    | 20    | 14    | 37    | 55    | 45    | 124   | 97    | 107   | 166   | 58    | 36    | 34    | 38    | 2     | 3     | 11    | Fam43b   |        |
| Fam47e   | 6     | 3     | 1     | 1     | 5     | 11    | 4     | 5     | 9     | 3     | 7     | 8     | 3     | 3     | 1     | 8     | 1     | 4     | 2     | 7     | 5     | 2     | 3     | 9     | 4     | 3     | 2     | 7     | Fam47e   |        |
| Fam50a   | 3934  | 3961  | 4841  | 4351  | 3474  | 3569  | 4074  | 2409  | 2357  | 2682  | 2470  | 2856  | 2565  | 3220  | 3978  | 3731  | 4661  | 4222  | 3708  | 3584  | 4075  | 2523  | 2381  | 3023  | 2753  | 3307  | 2901  | 3330  | Fam50a   |        |
| Fam50b   | 1     | 7     | 2     | 5     | 2     | 6     | 2     | 0     | 0     | 0     | 2     | 0     | 2     | 0     | 1     | 4     | 6     | 1     | 11    | 5     | 4     | 1     | 2     | 1     | 0     | 0     | 0     | 0     | Fam50b   |        |
| Fam53a   | 2158  | 2512  | 2658  | 2531  | 2084  | 2155  | 2116  | 1462  | 1720  | 1784  | 1842  | 2120  | 1888  | 1940  | 2090  | 2213  | 2767  | 2576  | 2271  | 1847  | 2019  | 1765  | 1605  | 2053  | 1825  | 2270  | 1877  | 1971  | Fam53a   |        |
| Fam53b   | 1848  | 2366  | 2307  | 2202  | 2412  | 2161  | 2340  | 1981  | 2520  | 2527  | 2396  | 3416  | 2355  | 2971  | 1870  | 1895  | 2734  | 2194  | 2678  | 2021  | 2329  | 2374  | 2076  | 3060  | 2792  | 3286  | 2854  | 2848  | Fam53b   |        |
| Fam53c   | 8343  | 8594  | 9345  | 9395  | 7692  | 7388  | 7242  | 5295  | 5218  | 5192  | 5401  | 5533  | 5091  | 4817  | 7718  | 7997  | 8788  | 8976  | 8119  | 7110  | 7116  | 5792  | 5147  | 6123  | 5657  | 6758  | 5441  | 5355  | Fam53c   |        |
| Fam71a   | 0     | 0     | 0     | 0     | 0     | 0     | 0     | 0     | 0     | 0     | 1     | 0     | 0     | 0     | 0     | 0     | 0     | 0     | 0     | 0     | 0     | 0     | 0     | 0     | 0     | 0     | 0     | 0     | Fam71a   |        |
| Fam71b   | 0     | 0     | 0     | 4     | 0     | 0     | 0     | 0     | 2     | 2     | 0     | 2     | 1     | 1     | 0     | 0     | 0     | 0     | 1     | 0     | 0     | 0     | 1     | 0     | 0     | 0     | 0     | 0     | Fam71b   |        |
| Fam71d   | 21    | 29    | 35    | 42    | 73    | 37    | 69    | 21    | 19    | 25    | 17    | 12    | 24    | 28    | 47    | 46    | 43    | 45    | 62    | 78    | 58    | 35    | 13    | 14    | 24    | 12    | 14    | 13    | Fam71d   |        |
| Fam71e1  | 445   | 542   | 607   | 576   | 532   | 575   | 578   | 517   | 520   | 714   | 572   | 781   | 747   | 735   | 479   | 379   | 506   | 469   | 611   | 580   | 495   | 563   | 475   | 722   | 747   | 674   | 752   | 714   | Fam71e1  |        |
| Fam71e2  | 0     | 1     | 0     | 0     | 0     | 2     | 0     | 0     | 0     | 0     | 0     | 0     | 0     | 0     | 1     | 2     | 0     | 0     | 1     | 0     | 1     | 3     | 0     | 0     | 0     | 0     | 2     | 0     | Fam71e2  |        |
| Fam71f1  | 5     | 5     | 7     | 8     | 2     | 6     | 7     | 4     | 2     | 0     | 3     | 1     | 6     | 1     | 13    | 9     | 3     | 8     | 2     | 8     | 6     | 3     | 3     | 2     | 0     | 3     | 2     | 1     | Fam71f1  |        |
| Fam71f2  | 85    | 76    | 68    | 96    | 88    | 71    | 88    | 60    | 51    | 67    | 46    | 41    | 39    | 38    | 87    | 82    | 87    | 74    | 94    | 86    | 78    | 43    | 60    | 48    | 56    | 40    | 41    | 42    | Fam71f2  |        |
| Fam72a   | 496   | 467   | 460   | 434   | 265   | 311   | 343   | 309   | 251   | 247   | 206   | 310   | 279   | 351   | 443   | 410   | 437   | 287   | 352   | 385   | 343   | 190   | 208   | 337   | 287   | 348   | 393   | 363   | Fam72a   |        |
| Fam76a   | 3537  | 3335  | 3579  | 3557  | 3110  | 3353  | 3366  | 2274  | 2254  | 2299  | 2433  | 2345  | 2488  | 2599  | 3576  | 3424  | 3480  | 3420  | 2845  | 3211  | 3403  | 2453  | 2467  | 2491  | 2633  | 2721  | 2408  | 2706  | Fam76a   |        |
| Fam76b   | 6873  | 4745  | 5292  | 5732  | 5992  | 6517  | 7304  | 7286  | 6071  | 5621  | 5908  | 7124  | 6674  | 7493  | 6719  | 5766  | 5388  | 5918  | 5744  | 6869  | 6591  | 6266  | 5733  | 6199  | 6398  | 6123  | 7488  | 6952  | Fam76b   |        |
| Fam78a   | 321   | 396   | 497   | 268   | 267   | 274   | 226   | 99    | 131   | 111   | 415   | 133   | 137   | 103   | 272   | 460   | 413   | 311   | 254   | 237   | 222   | 120   | 255   | 121   | 140   | 153   | 112   | 97    | Fam78a   |        |
| Fam78b   | 1846  | 2128  | 1982  | 2926  | 4232  | 3433  | 3747  | 3267  | 2862  | 3800  | 3028  | 3294  | 3369  | 3386  | 2326  | 2151  | 2677  | 3287  | 3792  | 3112  | 3708  | 5083  | 2888  | 3302  | 4106  | 2394  | 2814  | 2980  | Fam78b   |        |
| Fam81a   | 751   | 772   | 739   | 702   | 920   | 808   | 771   | 581   | 688   | 698   | 575   | 505   | 632   | 507   | 864   | 903   | 824   | 869   | 733   | 860   | 773   | 785   | 884   | 655   | 587   | 545   | 463   | 526   | Fam81a   |        |
| Fam81b   | 27    | 20    | 23    | 22    | 54    | 14    | 28    | 50    | 52    | 54    | 60    | 80    | 77    | 24    | 40    | 44    | 12    | 19    | 26    | 45    | 42    | 92    | 115   | 51    | 27    | 29    | 23    | 33    | Fam81b   |        |
| Fam83b   | 106   | 30    | 21    | 12    | 9     | 46    | 1     | 134   | 221   | 87    | 110   | 23    | 48    | 24    | 45    | 54    | 10    | 21    | 5     | 6     | 5     | 18    | 218   | 65    | 21    | 13    | 20    | 20    | Fam83b   |        |
| Fam83c   | 25    | 8     | 11    | 1     | 0     | 3     | 1     | 24    | 40    | 25    | 1     | 9     | 5     | 8     | 8     | 0     | 6     | 2     | 1     | 0     | 0     | 41    | 4     | 1     | 0     | 2     | 6     |       | Fam83c   |        |
| Fam83d   | 1836  | 2128  | 2133  | 1968  | 1217  | 1466  | 1579  | 1231  | 1432  | 1288  | 1431  | 2002  | 1736  | 1905  | 1619  | 1891  | 1774  | 1630  | 1562  | 1406  | 1413  | 1018  | 1302  | 1695  | 1256  | 2285  | 1886  | 1953  | Fam83d   |        |
| Fam83e   | 51    | 82    | 83    | 77    | 55    | 45    | 53    | 35    | 43    | 55    | 37    | 51    | 49    | 39    | 49    | 85    | 101   | 53    | 48    | 61    | 44    | 27    | 30    | 38    | 37    | 43    | 37    | 37    | Fam83e   |        |
| Fam83f   | 111   | 53    | 52    | 35    | 28    | 41    | 11    | 49    | 68    | 72    | 39    | 36    | 44    | 15    | 57    | 75    | 24    | 41    | 35    | 13    | 13    | 30    | 83    | 47    | 11    | 15    | 33    | 30    | Fam83f   |        |
| Fam83g   | 261   | 301   | 298   | 253   | 200   | 176   | 172   | 87    | 68    | 56    | 49    | 50    | 42    | 51    | 233   | 315   | 290   | 198   | 194   | 132   | 148   | 45    | 88    | 85    | 27    | 45    | 44    | 47    | Fam83g   |        |
| Fam83h   | 722   | 968   | 970   | 857   | 862   | 738   | 678   | 447   | 615   | 586   | 460   | 527   | 528   | 463   | 674   | 805   | 958   | 901   | 867   | 702   | 780   | 428   | 617   | 588   | 403   | 543   | 429   | 558   | Fam83h   |        |
| Fam89a   | 74    | 97    | 81    | 59    | 91    | 46    | 25    | 59    | 60    | 58    | 122   | 13    | 59    | 27    | 80    | 161   | 76    | 92    | 48    | 39    | 33    | 82    | 72    | 24    | 31    | 21    | 17    | 18    | Fam89a   |        |
| Fam89b   | 1     | 0     | 5     | 4     | 0     | 0     | 3     | 1     | 4     | 0     | 5     | 5     | 0     | 7     | 4     | 5     | 9     | 1     | 2     | 1     | 3     | 2     | 5     | 2     | 3     | 3     | 0     | 4     | Fam89b   |        |
| Fam8a1   | 13567 | 10221 | 13649 | 14074 | 15325 | 15395 | 17588 | 14075 | 11520 | 11996 | 11857 | 12551 | 11443 | 13417 | 14395 | 11188 | 13997 | 14206 | 15606 | 15073 | 17039 | 14813 | 11378 | 12901 | 14538 | 12184 | 12362 | 13232 | Fam8a1   |        |
| Fam90a1a | 0     | 0     | 0     | 0     | 1     | 0     | 0     | 0     | 0     | 0     | 0     | 0     | 0     | 0     | 0     | 0     | 0     | 0     | 0     | 0     | 0     | 0     | 0     | 0     | 0     | 0     | 0     | 0     | Fam90a1a |        |
| Fam90a1b | 42    | 22    | 44    | 31    | 21    | 22    | 21    | 6     | 3     | 6     | 9     | 12    | 6     | 13    | 28    | 21    | 32    | 11    | 16    | 14    | 44    | 8     | 6     | 7     | 19    | 9     | 12    | 14    | Fam90a1b |        |
| Fam91a1  | 1     | 1     | 0     | 0     | 0     | 0     | 0     | 0     | 1     | 0     | 1     | 0     | 0     | 0     | 1     | 0     | 0     | 0     | 2     | 0     | 0     | 1     | 2     | 0     | 1     | 0     | 0     | 0     | Fam91a1  |        |
| Fam98a   | 6811  | 6577  | 6378  | 6605  | 6466  | 6271  | 7117  | 6262  | 5987  | 5460  | 5983  | 5566  | 5668  | 5857  | 7415  | 6426  | 6342  | 6748  | 6648  | 6484  | 7071  | 6834  | 5900  | 5874  | 5760  | 6375  | 5778  | 5966  | 6030     | Fam98a |
| Fam98b   | 6599  | 5684  | 7871  | 6790  | 6546  | 6045  | 7083  | 7988  | 7000  | 7701  | 7347  | 5053  | 9006  | 11455 | 6504  | 5739  | 6162  | 5630  | 6348  | 6906  | 6591  | 7483  | 6757  | 9568  | 8819  | 11142 | 10542 | 11716 | Fam98b   |        |
| Fam98c   | 1142  | 1410  | 1490  | 1673  | 1475  | 1374  | 1288  | 488   | 540   | 595   | 565   | 617   | 518   | 481   | 1195  | 1277  | 1612  | 1470  | 1556  | 1272  | 1353  | 613   | 507   | 588   | 611   | 646   | 567   | 408   | Fam98c   |        |
| Fan1     | 1367  | 1524  | 1163  | 1153  | 1321  | 1429  | 1288  | 1293  | 1445  | 1128  | 1267  | 1415  | 1420  | 1316  | 1374  | 1398  | 1176  | 1140  | 1319  | 1596  | 1331  | 1051  | 1369  | 1136  | 1296  | 991   | 1641  | 1275  | Fan1     |        |
| Fanca    | 4726  | 4925  | 3540  | 4000  | 3175  | 3572  | 3700  | 1934  | 2176  | 1945  | 2029  | 3133  | 2722  | 2936  | 4032  | 4630  | 3931  | 3644  | 3615  | 3458  | 3502  | 1445  | 1836  | 2371  | 2044  | 2553  | 3124  | 3068  | Fanca    |        |
| Fancb    | 926   | 811   | 757   | 675   | 680   | 656   | 935   | 894   | 875   | 726   | 695   | 970   | 891   | 953   | 919   | 893   | 715   | 767   | 684   | 827   | 773   | 682   | 801   | 799   | 623   | 1001  | 984   | 943   | Fancb    |        |
| Fancc    | 749   | 788   | 692   | 561   | 657   | 749   | 659   | 1426  | 1365  | 1260  | 1191  | 1535  | 1466  | 1435  | 831   | 764   | 616   | 555   | 695   | 639   | 721   | 1315  | 1356  | 1199  | 1253  | 1384  | 1713  | 1580  | Fancc    |        |
| Fancd2   | 1691  | 1488  | 1157  | 928   | 839   | 1051  | 1159  | 2365  | 2076  | 1708  | 1748  | 2620  | 2288  | 2593  | 1444  | 1192  | 998   | 917   | 1092  | 1428  | 1184  | 1293  | 1774  | 1986  | 1814  | 2443  | 2875  | 2543  | Fancd2   |        |
| Fancd2os | 1     | 2     | 5     | 1     | 2     | 0     | 2     | 4     | 5     | 2     | 3     | 4     | 7     | 4     | 0</   |       |       |       |       |       |       |       |       |       |       |       |       |       |          |        |

|        |       |       |       |       |       |       |       |       |       |       |       |       |       |       |       |       |       |       |       |       |       |       |       |       |       |       |       |       |        |       |
|--------|-------|-------|-------|-------|-------|-------|-------|-------|-------|-------|-------|-------|-------|-------|-------|-------|-------|-------|-------|-------|-------|-------|-------|-------|-------|-------|-------|-------|--------|-------|
| Fat4   | 11194 | 12093 | 7664  | 9403  | 11639 | 14699 | 10658 | 15740 | 17974 | 16277 | 18614 | 14698 | 16718 | 14366 | 11446 | 13061 | 8686  | 9992  | 10022 | 11093 | 12692 | 13216 | 16260 | 13321 | 15844 | 11354 | 18056 | 13398 | Fat4   |       |
| Fate1  | 5     | 13    | 0     | 5     | 2     | 3     | 6     | 4     | 5     | 0     | 5     | 0     | 1     | 2     | 15    | 7     | 0     | 4     | 4     | 8     | 9     | 2     | 2     | 2     | 2     | 1     | 0     | 5     | 4      | Fate1 |
| Fau    | 15291 | 21622 | 18922 | 19373 | 17608 | 17314 | 17993 | 13420 | 15418 | 15628 | 18036 | 16537 | 18504 | 18763 | 14180 | 15657 | 18572 | 17142 | 18596 | 20649 | 17861 | 10550 | 15628 | 18834 | 17346 | 20381 | 19739 | 20445 | Fau    |       |
| Faxc   | 3700  | 3256  | 2297  | 3459  | 4943  | 5103  | 4164  | 9800  | 8709  | 8681  | 8369  | 8883  | 8500  | 8462  | 4056  | 3092  | 3174  | 3463  | 4200  | 4297  | 4505  | 9775  | 7508  | 7133  | 10455 | 3893  | 9089  | 7809  | Faxc   |       |
| Fb1    | 6569  | 8066  | 8924  | 9922  | 9882  | 9214  | 9275  | 7671  | 8963  | 10898 | 9386  | 11246 | 9527  | 10887 | 6435  | 7110  | 9598  | 9573  | 10002 | 7676  | 9269  | 10226 | 8209  | 11109 | 11437 | 9587  | 10119 | 9679  | Fb1    |       |
| Fb1i   | 10299 | 10274 | 8518  | 8977  | 8773  | 8583  | 8394  | 11011 | 10270 | 8909  | 8998  | 9081  | 8972  | 8562  | 10747 | 9664  | 8721  | 9019  | 8817  | 9631  | 8934  | 9840  | 10398 | 8772  | 9094  | 8817  | 9343  | 8933  | Fb1i   |       |
| Fb1    | 8113  | 10310 | 11140 | 10474 | 7125  | 7033  | 8751  | 5183  | 5800  | 6740  | 5946  | 7338  | 6474  | 8229  | 7303  | 7851  | 10791 | 8496  | 8313  | 7630  | 8739  | 4214  | 5505  | 8067  | 6321  | 9566  | 7864  | 9178  | Fb1    |       |
| Fblm1  | 2475  | 2004  | 2038  | 1191  | 1762  | 1629  | 1082  | 1906  | 2583  | 2202  | 2737  | 1800  | 2638  | 1654  | 1975  | 2973  | 1426  | 1602  | 1281  | 1291  | 1063  | 2408  | 2805  | 1906  | 1753  | 2423  | 1984  | 1836  | Fblm1  |       |
| Fb11   | 356   | 643   | 392   | 818   | 894   | 703   | 647   | 474   | 569   | 633   | 487   | 325   | 339   | 370   | 501   | 456   | 637   | 708   | 837   | 886   | 807   | 530   | 539   | 449   | 648   | 273   | 318   | 331   | Fb11   |       |
| Fb1n1  | 7434  | 8535  | 10061 | 6789  | 4949  | 4156  | 4758  | 3286  | 5136  | 7101  | 5828  | 7696  | 7623  | 8571  | 6835  | 6485  | 10391 | 7389  | 6550  | 4386  | 3187  | 3514  | 5534  | 8139  | 7118  | 5288  | 9701  | 8972  | 7888   | Fb1n1 |
| Fb1n2  | 7279  | 8841  | 6121  | 5330  | 2324  | 5739  | 1107  | 6150  | 9092  | 8005  | 9583  | 6162  | 8631  | 5764  | 6068  | 10951 | 5204  | 6593  | 1795  | 1181  | 1117  | 6742  | 10128 | 7372  | 5942  | 7376  | 6516  | 6539  | Fb1n2  |       |
| Fb1n5  | 1381  | 1151  | 830   | 498   | 247   | 860   | 151   | 1439  | 2116  | 1288  | 2504  | 1076  | 1759  | 1022  | 1344  | 1559  | 717   | 952   | 226   | 175   | 159   | 1235  | 2629  | 1214  | 958   | 1119  | 1225  | 1086  | Fb1n5  |       |
| Fb1n7  | 98    | 117   | 143   | 90    | 90    | 107   | 60    | 125   | 194   | 220   | 317   | 124   | 163   | 121   | 108   | 150   | 80    | 101   | 78    | 54    | 61    | 224   | 247   | 193   | 192   | 162   | 178   | 174   | Fb1n7  |       |
| Fb1n   | 11148 | 10607 | 6963  | 5990  | 4608  | 8152  | 2999  | 7562  | 10813 | 8905  | 16017 | 8816  | 13013 | 8343  | 9629  | 15190 | 5598  | 7701  | 3604  | 3625  | 3547  | 7907  | 14369 | 7643  | 7262  | 5427  | 10405 | 8495  | Fb1n   |       |
| Fb2n   | 17085 | 20849 | 15747 | 9951  | 5557  | 13368 | 3800  | 13406 | 22284 | 20252 | 30471 | 18225 | 30504 | 16467 | 16148 | 27495 | 12061 | 13197 | 5034  | 4381  | 4078  | 15527 | 24212 | 16709 | 14405 | 13641 | 22385 | 16916 | Fb2n   |       |
| Fbp1   | 1     | 1     | 0     | 1     | 3     | 0     | 0     | 6     | 2     | 4     | 18    | 3     | 2     | 3     | 1     | 6     | 9     | 0     | 0     | 1     | 22    | 9     | 6     | 5     | 2     | 1     | 4     | 4     | Fbp1   |       |
| Fbp2   | 0     | 7     | 0     | 7     | 9     | 1     | 0     | 4     | 9     | 4     | 24    | 1     | 1     | 0     | 5     | 2     | 4     | 3     | 0     | 0     | 2     | 17    | 4     | 6     | 2     | 6     | 0     | 0     | Fbp2   |       |
| Fbrs   | 3049  | 4160  | 4942  | 4881  | 4468  | 3694  | 3578  | 2941  | 3368  | 4535  | 4055  | 4291  | 3796  | 3830  | 2949  | 3610  | 5021  | 4490  | 4753  | 3145  | 4078  | 4493  | 3271  | 4636  | 4115  | 4517  | 3478  | 3590  | Fbrs   |       |
| Fbrs11 | 4643  | 5922  | 6289  | 6709  | 6521  | 5579  | 5171  | 3709  | 4431  | 5282  | 4612  | 5868  | 4378  | 5033  | 4360  | 4897  | 6876  | 6724  | 6779  | 4836  | 5664  | 5419  | 3741  | 5619  | 5677  | 6536  | 4829  | 4467  | Fbrs11 |       |
| Fbx12  | 2185  | 2522  | 2426  | 2437  | 2032  | 1998  | 1986  | 1518  | 1608  | 1777  | 1738  | 1866  | 1899  | 1680  | 1920  | 2125  | 2343  | 2321  | 2109  | 2078  | 1837  | 1663  | 1685  | 1961  | 1737  | 1673  | 1812  | 1787  | Fbx12  |       |
| Fbx13  | 81    | 69    | 54    | 72    | 80    | 37    | 54    | 43    | 41    | 46    | 39    | 48    | 37    | 47    | 50    | 58    | 54    | 77    | 34    | 65    | 56    | 50    | 36    | 49    | 42    | 21    | 44    | 43    | Fbx13  |       |
| Fbx14  | 3301  | 3697  | 4324  | 4316  | 3310  | 3354  | 3213  | 2904  | 2679  | 3358  | 2886  | 3989  | 3301  | 3860  | 2951  | 3354  | 4111  | 3949  | 3490  | 3309  | 3380  | 2968  | 2441  | 3813  | 3533  | 4483  | 3579  | 3970  | Fbx14  |       |
| Fbx15  | 593   | 768   | 534   | 626   | 689   | 695   | 605   | 471   | 532   | 517   | 497   | 527   | 463   | 503   | 591   | 513   | 702   | 643   | 789   | 764   | 593   | 545   | 504   | 601   | 540   | 562   | 618   | 468   | Fbx15  |       |
| Fbx16  | 2449  | 3251  | 3296  | 3486  | 4089  | 3438  | 3549  | 2749  | 3019  | 3918  | 3091  | 3753  | 2989  | 3572  | 2438  | 2544  | 3498  | 3500  | 4076  | 3070  | 3559  | 4468  | 2739  | 3933  | 4343  | 3489  | 3285  | 3377  | Fbx16  |       |
| Fbx17  | 2431  | 2103  | 2009  | 2248  | 2716  | 3051  | 2131  | 3598  | 3186  | 3280  | 3378  | 3246  | 3297  | 3559  | 2321  | 2281  | 2190  | 2279  | 2501  | 2805  | 3130  | 3865  | 3740  | 3125  | 3837  | 2356  | 3588  | 3443  | Fbx17  |       |
| Fbx18  | 4086  | 5569  | 6320  | 7205  | 6437  | 6006  | 5663  | 3588  | 4051  | 5109  | 4789  | 5789  | 5278  | 5373  | 4188  | 4690  | 7047  | 6949  | 7077  | 5125  | 6068  | 5339  | 3880  | 5574  | 6119  | 4445  | 5385  | 5511  | Fbx18  |       |
| Fbx19  | 6885  | 8407  | 9158  | 10371 | 11709 | 9417  | 9047  | 11747 | 11725 | 15245 | 13352 | 14939 | 13674 | 13418 | 6906  | 6763  | 10880 | 10144 | 12507 | 9406  | 9956  | 14514 | 10956 | 15684 | 16236 | 15533 | 14106 | 14049 | Fbx19  |       |
| Fbx2   | 978   | 1111  | 798   | 1152  | 1289  | 1247  | 1259  | 1169  | 1295  | 1283  | 1158  | 975   | 1056  | 883   | 955   | 1110  | 1023  | 1260  | 1122  | 1275  | 1230  | 1390  | 1150  | 968   | 1269  | 754   | 927   | 819   | Fbx2   |       |
| Fbx20  | 7052  | 6471  | 5563  | 8181  | 8188  | 8342  | 8254  | 6218  | 5213  | 6509  | 6213  | 6498  | 6476  | 6762  | 7005  | 6681  | 6793  | 7771  | 7958  | 7079  | 8745  | 6706  | 5778  | 6089  | 7191  | 4113  | 6419  | 5873  | Fbx20  |       |
| Fbx21  | 621   | 559   | 506   | 583   | 575   | 608   | 527   | 171   | 176   | 161   | 189   | 176   | 183   | 199   | 603   | 714   | 495   | 573   | 503   | 543   | 536   | 226   | 223   | 139   | 155   | 150   | 175   | 166   | Fbx21  |       |
| Fbx22  | 325   | 428   | 429   | 504   | 479   | 432   | 507   | 275   | 286   | 308   | 402   | 394   | 347   | 400   | 352   | 360   | 599   | 447   | 537   | 434   | 515   | 371   | 275   | 388   | 367   | 399   | 378   | 407   | Fbx22  |       |
| Fbx3   | 3132  | 2676  | 2989  | 3048  | 3296  | 3321  | 3529  | 6172  | 5631  | 4881  | 5604  | 5436  | 5568  | 5591  | 3294  | 2959  | 2990  | 3050  | 3153  | 3454  | 3376  | 5693  | 5733  | 4998  | 5281  | 5125  | 5612  | 5446  | Fbx3   |       |
| Fbx4   | 940   | 894   | 808   | 751   | 870   | 831   | 932   | 996   | 988   | 882   | 874   | 884   | 848   | 821   | 1094  | 781   | 830   | 806   | 750   | 967   | 885   | 969   | 1043  | 753   | 765   | 771   | 919   | 897   | Fbx4   |       |
| Fbx5   | 7794  | 6124  | 5235  | 5712  | 6234  | 7129  | 7497  | 8989  | 7970  | 5830  | 6668  | 6387  | 6485  | 6957  | 7965  | 7039  | 5238  | 5873  | 5792  | 8491  | 6831  | 6665  | 7724  | 5821  | 6237  | 5986  | 6746  | 6543  | Fbx5   |       |
| Fbx6   | 2527  | 3412  | 2934  | 3189  | 2791  | 2669  | 2627  | 1824  | 2132  | 2128  | 2170  | 2339  | 2216  | 1966  | 2407  | 2867  | 3101  | 2869  | 3071  | 2702  | 2607  | 2017  | 2131  | 2418  | 2256  | 2727  | 2244  | 2074  | Fbx6   |       |
| Fbx7   | 1201  | 1069  | 1135  | 921   | 1118  | 1020  | 736   | 1864  | 2184  | 2258  | 2300  | 2070  | 2489  | 1808  | 1125  | 1281  | 998   | 983   | 855   | 684   | 760   | 2182  | 2303  | 2029  | 1733  | 2018  | 1962  | 2013  | Fbx7   |       |
| Fbx8   | 78    | 93    | 95    | 68    | 80    | 87    | 66    | 23    | 41    | 22    | 41    | 23    | 43    | 20    | 108   | 106   | 105   | 112   | 58    | 65    | 42    | 43    | 48    | 29    | 25    | 33    | 22    | 32    | Fbx8   |       |
| Fbxo10 | 3881  | 4497  | 4198  | 4513  | 4325  | 4455  | 4000  | 2392  | 2858  | 2834  | 2935  | 2785  | 2406  | 2398  | 3570  | 3964  | 4313  | 4357  | 4219  | 3743  | 3836  | 2598  | 2810  | 2975  | 2799  | 2835  | 2658  | 2317  | Fbxo10 |       |
| Fbxo11 | 9491  | 7123  | 10786 | 11131 | 13029 | 11897 | 13615 | 15282 | 12484 | 15481 | 14724 | 16196 | 14749 | 17029 | 9854  | 8575  | 11097 | 11849 | 13280 | 10220 | 13147 | 18259 | 12745 | 15524 | 17085 | 14936 | 14494 | 16848 | Fbxo11 |       |
| Fbxo15 | 21    | 18    | 22    | 10    | 13    | 22    | 17    | 26    | 24    | 10    | 31    | 25    | 29    | 20    | 20    | 18    | 21    | 19    | 17    | 19    | 12    | 15    | 23    | 24    | 25    | 28    | 28    | 33    | Fbxo15 |       |
| Fbxo16 | 937   | 1019  | 1020  | 911   | 904   | 861   | 862   | 882   | 900   | 874   | 639   | 958   | 1006  | 995   | 1040  | 880   | 909   | 748   | 860   | 914   | 857   | 1053  | 844   | 882   | 879   | 943   | 951   | 1042  | Fbxo16 |       |
| Fbxo17 | 347   | 333   | 388   | 275   | 277   | 341   | 213   | 272   | 375   | 341   | 550   | 302   | 384   | 277   | 314   | 387   | 311   | 280   | 303   | 263   | 229   | 286   | 400   | 303   | 269   | 372   | 336   | 345   | Fbxo17 |       |
| Fbxo2  | 269   | 352   | 440   | 414   | 403   | 309   | 255   | 67    | 120   | 142   | 179   | 53    | 82    | 48    | 282   | 301   | 371   | 351   | 354   | 351   | 266   | 105   | 124   | 85    | 95    | 65    | 49    | 64    | Fbxo2  |       |
| Fbxo21 | 9401  | 10304 | 10656 | 11755 | 11999 | 10960 | 11616 | 10233 | 10635 | 11005 | 9963  | 11952 | 10317 | 11443 | 9434  | 8769  | 11454 | 11407 | 12638 | 10525 | 12151 | 12068 | 9493  | 11279 | 12526 | 11565 | 10461 | 10993 | Fbxo21 |       |
| Fbxo22 | 2628  | 2541  | 3232  | 3125  | 3340  | 2840  | 3224  | 4168  | 3827  | 4305  | 4418  | 4626  | 4197  | 5131  | 2538  | 2538  | 3242  | 2861  | 3274  | 2823  | 3125  | 4144  | 3729  | 4620  | 4693  | 5109  | 4668  | 4906  | Fbxo22 |       |
| Fbxo24 | 16    | 36    | 33    | 43    | 40    | 27    | 12    | 15    | 21    | 12    | 21    | 40    | 29    | 36    | 38    | 38    | 42    | 25    | 34    | 38    | 34    | 22    | 25    | 25    | 34    | 28    | 42    | 32    | Fbxo24 |       |
| Fbxo25 | 3233  | 3924  | 3092  | 4101  | 3974  | 3769  | 4179  | 3074  | 2952  | 3091  | 2730  | 2641  | 2467  | 2863  | 3494  | 3392  | 3342  | 4187  | 3770  | 4114  | 4386  | 3078  | 3055  | 2988  | 3384  | 2469  | 2506  | 2606  | Fbxo25 |       |
| Fbxo27 | 437   | 410   | 501   | 324   | 389   | 455   | 370   | 228   | 309   | 275</ |       |       |       |       |       |       |       |       |       |       |       |       |       |       |       |       |       |       |        |       |

|         |       |       |       |       |       |       |       |       |       |       |       |       |       |       |       |       |       |       |       |       |       |       |       |       |       |       |       |       |         |
|---------|-------|-------|-------|-------|-------|-------|-------|-------|-------|-------|-------|-------|-------|-------|-------|-------|-------|-------|-------|-------|-------|-------|-------|-------|-------|-------|-------|-------|---------|
| Fbxw17  | 1276  | 1273  | 1043  | 1154  | 1196  | 1212  | 1101  | 1660  | 1780  | 1671  | 1728  | 1757  | 1684  | 1566  | 1187  | 1264  | 993   | 969   | 1075  | 1225  | 956   | 1718  | 1588  | 1494  | 1574  | 1437  | 1641  | 1539  | Fbxw17  |
| Fbxw18  | 1     | 3     | 0     | 0     | 3     | 0     | 0     | 1     | 8     | 0     | 10    | 5     | 3     | 11    | 1     | 8     | 1     | 1     | 1     | 1     | 1     | 5     | 16    | 1     | 5     | 6     | 21    | 7     | Fbxw18  |
| Fbxw19  | 0     | 0     | 0     | 0     | 2     | 1     | 0     | 0     | 1     | 0     | 2     | 1     | 0     | 0     | 0     | 0     | 5     | 0     | 0     | 0     | 0     | 0     | 0     | 2     | 0     | 1     | 0     | 0     | Fbxw19  |
| Fbxw20  | 4169  | 3767  | 3583  | 3746  | 3582  | 3630  | 4238  | 4129  | 3949  | 3666  | 3913  | 4211  | 3891  | 4109  | 4112  | 3608  | 3819  | 3807  | 3759  | 3865  | 3964  | 3922  | 3974  | 4108  | 3987  | 4448  | 3941  | 4314  | Fbxw20  |
| Fbxw21  | 0     | 0     | 8     | 0     | 0     | 2     | 0     | 0     | 0     | 0     | 0     | 0     | 1     | 3     | 1     | 0     | 0     | 0     | 0     | 0     | 0     | 7     | 3     | 2     | 2     | 0     | 1     | 4     | Fbxw21  |
| Fbxw22  | 0     | 1     | 0     | 0     | 1     | 0     | 0     | 1     | 0     | 0     | 1     | 0     | 1     | 0     | 0     | 0     | 0     | 0     | 0     | 0     | 0     | 3     | 0     | 0     | 2     | 0     | 0     | 0     | Fbxw22  |
| Fbxw24  | 15    | 16    | 7     | 4     | 0     | 7     | 1     | 4     | 12    | 4     | 16    | 7     | 7     | 2     | 7     | 10    | 7     | 1     | 0     | 6     | 7     | 13    | 17    | 5     | 1     | 0     | 12    | 5     | Fbxw24  |
| Fbxw25  | 6     | 4     | 0     | 0     | 2     | 5     | 0     | 5     | 4     | 1     | 7     | 10    | 1     | 2     | 0     | 5     | 1     | 0     | 1     | 1     | 2     | 2     | 8     | 1     | 3     | 6     | 2     | 5     | Fbxw25  |
| Fbxw26  | 5     | 5     | 0     | 0     | 0     | 0     | 2     | 2     | 0     | 0     | 0     | 0     | 8     | 2     | 4     | 2     | 0     | 0     | 1     | 0     | 1     | 0     | 6     | 2     | 1     | 0     | 5     | 1     | Fbxw26  |
| Fbxw27  | 2     | 0     | 4     | 2     | 0     | 0     | 4     | 0     | 3     | 0     | 5     | 0     | 7     | 6     | 1     | 0     | 2     | 2     | 0     | 1     | 0     | 8     | 6     | 10    | 2     | 3     | 2     | 5     | Fbxw27  |
| Fbxw28  | 0     | 0     | 0     | 0     | 0     | 0     | 0     | 0     | 2     | 0     | 0     | 0     | 0     | 0     | 0     | 0     | 0     | 0     | 0     | 0     | 0     | 2     | 1     | 0     | 0     | 0     | 0     | 0     | Fbxw28  |
| Fbxw4   | 439   | 454   | 488   | 432   | 594   | 479   | 454   | 769   | 838   | 1022  | 1012  | 888   | 820   | 863   | 431   | 430   | 499   | 556   | 508   | 361   | 469   | 892   | 942   | 1048  | 952   | 1070  | 944   | 879   | Fbxw4   |
| Fbxw5   | 3223  | 4254  | 3705  | 3899  | 3912  | 3643  | 3974  | 3650  | 4121  | 4090  | 3900  | 4531  | 3996  | 4304  | 3294  | 3327  | 4131  | 3842  | 4210  | 3532  | 3813  | 4502  | 3880  | 4796  | 4193  | 4319  | 4262  | 4079  | Fbxw5   |
| Fbxw7   | 5968  | 5769  | 6374  | 7079  | 7016  | 6763  | 7856  | 4191  | 3842  | 4044  | 3855  | 4545  | 3801  | 4599  | 6446  | 5667  | 6904  | 6818  | 6696  | 7040  | 7251  | 4024  | 3501  | 4339  | 4349  | 4679  | 4193  | 4423  | Fbxw7   |
| Fbxw8   | 7997  | 9580  | 8726  | 7461  | 6474  | 7146  | 6316  | 7474  | 8254  | 7354  | 7560  | 8619  | 8424  | 7362  | 7580  | 8328  | 7998  | 6929  | 7787  | 7314  | 6497  | 6904  | 8400  | 7862  | 7750  | 9503  | 8476  | 8076  | Fbxw8   |
| Fbxw9   | 1821  | 2202  | 2180  | 2470  | 2342  | 2232  | 2077  | 1633  | 1929  | 1877  | 1882  | 1912  | 1879  | 1616  | 1770  | 2103  | 2341  | 2556  | 2534  | 2093  | 2119  | 2224  | 1990  | 1979  | 2164  | 1825  | 1869  | 1709  | Fbxw9   |
| Fcamr   | 1     | 1     | 3     | 2     | 1     | 0     | 0     | 7     | 4     | 2     | 2     | 2     | 3     | 4     | 3     | 2     | 1     | 0     | 2     | 0     | 0     | 2     | 5     | 1     | 2     | 5     | 9     | 5     | Fcamr   |
| Fcer1a  | 0     | 0     | 0     | 0     | 0     | 0     | 0     | 0     | 0     | 0     | 0     | 0     | 0     | 0     | 0     | 0     | 0     | 0     | 0     | 0     | 0     | 0     | 2     | 2     | 0     | 0     | 0     | 0     | Fcer1a  |
| Fcer1g  | 186   | 228   | 215   | 223   | 151   | 177   | 180   | 217   | 271   | 221   | 281   | 225   | 244   | 238   | 241   | 240   | 185   | 235   | 146   | 181   | 204   | 214   | 332   | 230   | 208   | 269   | 193   | 233   | Fcer1g  |
| Fcer2a  | 0     | 0     | 0     | 0     | 0     | 0     | 0     | 0     | 0     | 0     | 2     | 0     | 1     | 0     | 0     | 0     | 0     | 0     | 0     | 0     | 0     | 0     | 0     | 0     | 0     | 0     | 0     | 0     | Fcer2a  |
| Fcf1    | 2877  | 2586  | 2861  | 2537  | 2162  | 2251  | 2504  | 2457  | 2155  | 2193  | 2033  | 2530  | 2420  | 2773  | 3108  | 2464  | 2675  | 2426  | 2495  | 2809  | 2358  | 1865  | 2141  | 2501  | 2206  | 3201  | 2815  | 2848  | Fcf1    |
| Fcgbp   | 16    | 11    | 1     | 3     | 7     | 6     | 0     | 23    | 29    | 49    | 6     | 10    | 14    | 13    | 7     | 15    | 8     | 2     | 5     | 3     | 1     | 12    | 39    | 13    | 5     | 24    | 9     | 5     | Fcgbp   |
| Fcgr1   | 59    | 59    | 67    | 64    | 42    | 62    | 32    | 116   | 171   | 131   | 165   | 115   | 127   | 116   | 69    | 76    | 38    | 54    | 41    | 62    | 71    | 127   | 237   | 131   | 107   | 175   | 123   | 134   | Fcgr1   |
| Fcgr2b  | 6     | 45    | 22    | 46    | 30    | 53    | 29    | 26    | 40    | 31    | 47    | 25    | 29    | 32    | 25    | 44    | 15    | 52    | 19    | 39    | 30    | 63    | 85    | 31    | 58    | 38    | 34    | 39    | Fcgr2b  |
| Fcgr3   | 231   | 194   | 221   | 200   | 174   | 216   | 180   | 364   | 361   | 256   | 419   | 278   | 315   | 253   | 260   | 282   | 160   | 235   | 103   | 251   | 206   | 291   | 530   | 279   | 292   | 344   | 278   | 298   | Fcgr3   |
| Fcgr4   | 9     | 10    | 6     | 12    | 2     | 7     | 1     | 2     | 15    | 3     | 25    | 15    | 12    | 11    | 7     | 12    | 8     | 6     | 14    | 9     | 18    | 12    | 7     | 3     | 6     | 12    | 13    | Fcgr4 |         |
| Fcgrt   | 581   | 743   | 676   | 642   | 807   | 865   | 431   | 692   | 1210  | 950   | 1250  | 647   | 838   | 629   | 645   | 886   | 534   | 886   | 560   | 855   | 542   | 952   | 1799  | 867   | 853   | 746   | 816   | 622   | Fcgrt   |
| Fcho1   | 3205  | 4962  | 5068  | 6933  | 6399  | 5815  | 5618  | 2519  | 2844  | 3491  | 2810  | 3151  | 2608  | 3061  | 3643  | 3801  | 6245  | 6720  | 7021  | 5309  | 5828  | 4152  | 2520  | 3493  | 4130  | 2937  | 2736  | 2692  | Fcho1   |
| Fcho2   | 5931  | 4188  | 6298  | 6402  | 7018  | 7419  | 6954  | 6889  | 6071  | 6550  | 7837  | 6563  | 7155  | 7297  | 5968  | 6203  | 6017  | 6495  | 6995  | 6199  | 7382  | 7554  | 6502  | 6788  | 7043  | 6252  | 6886  | 7204  | Fcho2   |
| Fchsd1  | 3430  | 4681  | 4058  | 5755  | 4858  | 4549  | 4508  | 1318  | 1426  | 1590  | 1350  | 1404  | 1412  | 1198  | 3455  | 4312  | 4909  | 5727  | 4848  | 4304  | 4690  | 1619  | 1362  | 1548  | 1639  | 1383  | 1259  | 1136  | Fchsd1  |
| Fchsd2  | 4223  | 3892  | 3957  | 5024  | 6391  | 5703  | 6290  | 6845  | 6375  | 7084  | 6536  | 6648  | 6144  | 6778  | 4511  | 3924  | 4383  | 5263  | 5913  | 5122  | 6361  | 7912  | 5988  | 6548  | 7705  | 5705  | 5672  | 6145  | Fchsd2  |
| Fcmr    | 0     | 1     | 0     | 0     | 2     | 1     | 0     | 4     | 0     | 1     | 0     | 1     | 0     | 2     | 0     | 0     | 0     | 0     | 0     | 0     | 0     | 0     | 0     | 0     | 0     | 0     | 2     | 0     | Fcmr    |
| Fcna    | 32    | 40    | 34    | 64    | 61    | 46    | 38    | 61    | 68    | 62    | 87    | 59    | 37    | 61    | 37    | 46    | 61    | 51    | 34    | 71    | 34    | 50    | 95    | 56    | 36    | 41    | 30    | 68    | Fcna    |
| Fcna    | 0     | 5     | 3     | 2     | 2     | 1     | 3     | 0     | 1     | 3     | 11    | 1     | 7     | 1     | 0     | 5     | 0     | 0     | 2     | 2     | 4     | 7     | 6     | 1     | 1     | 7     | 8     | 0     | Fcna    |
| Fcor    | 37    | 23    | 25    | 13    | 23    | 11    | 35    | 60    | 44    | 76    | 100   | 43    | 62    | 87    | 22    | 8     | 23    | 9     | 16    | 25    | 29    | 57    | 35    | 53    | 68    | 54    | 55    | 78    | Fcor    |
| Fcr11   | 2     | 0     | 0     | 15    | 7     | 1     | 10    | 3     | 4     | 5     | 3     | 2     | 7     | 5     | 5     | 5     | 9     | 1     | 4     | 4     | 0     | 7     | 14    | 5     | 1     | 18    | 1     | 4     | Fcr11   |
| Fcr15   | 0     | 0     | 0     | 0     | 2     | 0     | 0     | 0     | 0     | 0     | 0     | 0     | 0     | 0     | 0     | 0     | 0     | 0     | 0     | 0     | 0     | 0     | 0     | 0     | 0     | 0     | 0     | 0     | Fcr15   |
| Fcr16   | 5     | 4     | 3     | 1     | 7     | 7     | 2     | 18    | 17    | 6     | 6     | 5     | 17    | 12    | 11    | 12    | 13    | 1     | 5     | 9     | 2     | 5     | 5     | 11    | 1     | 8     | 7     | 4     | Fcr16   |
| Fcr1a   | 0     | 0     | 0     | 0     | 0     | 0     | 0     | 1     | 0     | 0     | 2     | 0     | 0     | 1     | 0     | 1     | 0     | 0     | 0     | 0     | 0     | 0     | 1     | 1     | 0     | 0     | 0     | 0     | Fcr1a   |
| Fcr1b   | 6     | 22    | 21    | 15    | 11    | 9     | 10    | 2     | 2     | 3     | 0     | 2     | 0     | 0     | 17    | 14    | 24    | 13    | 11    | 18    | 5     | 2     | 1     | 3     | 0     | 8     | 3     | 0     | Fcr1b   |
| Fcr1s   | 451   | 493   | 527   | 429   | 483   | 433   | 336   | 653   | 815   | 641   | 929   | 694   | 626   | 525   | 582   | 611   | 378   | 532   | 390   | 518   | 410   | 688   | 1148  | 699   | 612   | 688   | 723   | 574   | Fcr1s   |
| Fcsk    | 1632  | 2007  | 1818  | 1885  | 1473  | 1491  | 1555  | 1122  | 1290  | 1160  | 1190  | 1282  | 1296  | 1177  | 1453  | 1619  | 1853  | 1738  | 1815  | 1442  | 1378  | 1068  | 1193  | 1436  | 1191  | 1529  | 1289  | 1266  | Fcsk    |
| Fdft1   | 10062 | 12264 | 9390  | 9845  | 9456  | 9808  | 9919  | 9990  | 8869  | 8529  | 7338  | 8993  | 8902  | 9033  | 10962 | 9974  | 9754  | 9578  | 10677 | 11190 | 9805  | 9022  | 8046  | 8479  | 9452  | 9262  | 9817  | 9896  | Fdft1   |
| Fdps    | 490   | 473   | 372   | 425   | 304   | 341   | 341   | 281   | 255   | 319   | 242   | 418   | 400   | 394   | 385   | 436   | 474   | 417   | 271   | 305   | 334   | 294   | 271   | 360   | 368   | 385   | 466   | 418   | Fdps    |
| Fdx1    | 633   | 617   | 682   | 753   | 641   | 595   | 632   | 833   | 762   | 759   | 836   | 747   | 784   | 898   | 686   | 558   | 684   | 582   | 666   | 715   | 672   | 687   | 829   | 761   | 736   | 775   | 731   | 756   | Fdx1    |
| Fdx2    | 29    | 12    | 16    | 22    | 19    | 17    | 34    | 35    | 42    | 43    | 45    | 60    | 34    | 59    | 28    | 19    | 25    | 12    | 34    | 21    | 35    | 60    | 25    | 53    | 43    | 48    | 37    | 58    | Fdx2    |
| Fdxacb1 | 228   | 238   | 300   | 184   | 268   | 249   | 227   | 784   | 730   | 616   | 621   | 657   | 691   | 698   | 240   | 234   | 267   | 201   | 250   | 246   | 222   | 670   | 715   | 650   | 622   | 818   | 838   | 735   | Fdxacb1 |
| Fdxr    | 950   | 1380  | 1493  | 1551  | 1350  | 1126  | 1245  | 898   | 950   | 1235  | 1019  | 1110  | 1058  | 1024  | 978   | 1219  | 1615  | 1538  | 1593  | 1172  | 1171  | 1150  | 849   | 1124  | 1134  | 1136  | 983   | 1030  | Fdxr    |
| Fech    | 2689  | 2685  | 2399  | 2062  | 2054  | 2362  | 2297  | 2379  | 3085  | 2186  | 2443  | 2197  | 3832  | 2702  | 2777  | 2516  | 2279  | 2198  | 2150  | 2327  | 2179  | 2171  | 2988  | 1904  | 2123  | 2306  | 2649  | 3673  | Fech    |
| Fem1a   | 5445  | 6012  | 4619  | 5926  | 5213  | 5648  | 5084  | 4606  | 4983  | 5007  | 4610  | 5070  | 4744  | 4784  | 5168  | 5386  | 5059  | 5710  | 5487  | 5031  | 5402  | 5055  | 4375  | 4808  | 5467  | 4306  | 4842  | 4703  | Fem1a   |
| Fem1al  | 10    | 9     | 7     | 7     | 3     | 0     | 10    | 5     | 6     | 8     | 9     | 7     | 10    | 9     | 5     | 2     | 1     | 12    | 12    | 9     | 5     | 5     | 6     | 9     | 16    | 6     | 2     | 4     | Fem1al  |
| Fem1b   | 28217 | 26857 | 25724 | 31041 | 33504 | 33329 | 34174 | 27500 | 21847 | 23287 | 21176 | 24085 | 21465 | 22525 | 30168 | 25031 | 29175 | 31996 | 33915 | 32301 | 34809 | 27532 | 21726 | 22716 | 26277 | 19091 | 24392 | 23295 | Fem1b   |
| Fem1c   | 7130  | 5762  | 6643  | 7540  | 7488  | 7570  | 7987  | 7333  | 6228  | 6323  | 6603  | 7051  | 6738  | 7217  | 7205  | 6462  | 7188  | 7081  | 7123  | 6944  | 7627  | 7568  | 6297  | 6808  | 7366  | 6771  | 7143  | 7250  | Fem1c   |
| Fem1    | 5571  | 6296  | 5936  | 4556  | 3488  | 4220  | 4549  | 3605  | 3582  | 2984  | 3042  | 4636  | 4284  | 4     |       |       |       |       |       |       |       |       |       |       |       |       |       |       |         |



|          |       |       |       |       |       |       |       |      |       |       |       |       |       |       |       |       |       |       |       |       |       |      |       |       |      |       |       |       |          |      |
|----------|-------|-------|-------|-------|-------|-------|-------|------|-------|-------|-------|-------|-------|-------|-------|-------|-------|-------|-------|-------|-------|------|-------|-------|------|-------|-------|-------|----------|------|
| Fgd4     | 2300  | 1824  | 1611  | 2054  | 2950  | 2976  | 3174  | 7222 | 5693  | 4930  | 4634  | 5925  | 5214  | 6701  | 2745  | 2066  | 1909  | 2042  | 2667  | 3287  | 2995  | 5875 | 5073  | 4897  | 6265 | 4027  | 6043  | 6005  | Fgd4     |      |
| Fgd5     | 1103  | 1368  | 1372  | 1265  | 2014  | 1463  | 1380  | 1642 | 2021  | 2384  | 2629  | 1827  | 1810  | 1798  | 1237  | 1520  | 1460  | 1306  | 1564  | 1056  | 1373  | 2219 | 2017  | 1861  | 2151 | 1558  | 1722  | 1565  | Fgd5     |      |
| Fgd6     | 5096  | 5009  | 4914  | 5043  | 4922  | 5091  | 4947  | 1960 | 1976  | 2107  | 2269  | 2431  | 2837  | 2291  | 5035  | 5660  | 5188  | 5604  | 4604  | 4403  | 5132  | 2381 | 2142  | 2013  | 2042 | 1508  | 2502  | 2336  | Fgd6     |      |
| Fgf1     | 13    | 14    | 8     | 6     | 31    | 3     | 10    | 40   | 78    | 47    | 190   | 10    | 24    | 14    | 18    | 5     | 1     | 37    | 6     | 12    | 13    | 57   | 144   | 34    | 22   | 29    | 14    | 17    | Fgf1     |      |
| Fgf10    | 520   | 224   | 278   | 244   | 305   | 256   | 201   | 479  | 478   | 399   | 728   | 127   | 371   | 92    | 554   | 495   | 235   | 217   | 147   | 209   | 164   | 376  | 532   | 235   | 144  | 282   | 132   | 116   | Fgf10    |      |
| Fgf11    | 3630  | 3863  | 3938  | 5401  | 4969  | 4418  | 4811  | 1454 | 1535  | 1899  | 1793  | 1443  | 1435  | 1392  | 3609  | 3632  | 4536  | 5401  | 4793  | 3890  | 4950  | 2181 | 1585  | 1642  | 1789 | 1380  | 1115  | 1265  | Fgf11    |      |
| Fgf12    | 469   | 333   | 487   | 572   | 1057  | 761   | 745   | 967  | 1038  | 1062  | 1052  | 522   | 657   | 592   | 527   | 380   | 524   | 601   | 757   | 762   | 793   | 1313 | 993   | 767   | 1060 | 507   | 483   | 544   | Fgf12    |      |
| Fgf13    | 2413  | 2553  | 2339  | 3234  | 5933  | 3741  | 4433  | 4807 | 4846  | 4762  | 4991  | 3257  | 4261  | 3349  | 3492  | 3002  | 3091  | 4161  | 3909  | 3537  | 4400  | 7043 | 4243  | 3699  | 5248 | 3015  | 2973  | 3159  | Fgf13    |      |
| Fgf14    | 612   | 549   | 437   | 771   | 922   | 872   | 1064  | 1290 | 1205  | 905   | 851   | 907   | 689   | 923   | 866   | 624   | 618   | 670   | 829   | 1167  | 963   | 1362 | 962   | 804   | 1109 | 673   | 924   | 808   | Fgf14    |      |
| Fgf15    | 1465  | 1272  | 1727  | 1201  | 1391  | 1586  | 1493  | 2556 | 1879  | 1853  | 1376  | 3077  | 2105  | 2909  | 1530  | 1026  | 1837  | 945   | 1733  | 1562  | 1446  | 2540 | 1685  | 2330  | 2361 | 2948  | 3281  | 3032  | Fgf15    |      |
| Fgf16    | 28    | 14    | 16    | 20    | 32    | 3     | 18    | 17   | 21    | 20    | 43    | 2     | 15    | 3     | 18    | 12    | 13    | 11    | 10    | 14    | 15    | 17   | 35    | 12    | 6    | 21    | 0     | 2     | Fgf16    |      |
| Fgf17    | 185   | 262   | 285   | 332   | 201   | 221   | 227   | 298  | 330   | 278   | 219   | 589   | 601   | 488   | 214   | 244   | 258   | 296   | 302   | 229   | 243   | 189  | 146   | 302   | 322  | 591   | 488   | 544   | Fgf17    |      |
| Fgf18    | 52    | 97    | 95    | 38    | 113   | 85    | 54    | 150  | 201   | 184   | 299   | 139   | 155   | 103   | 65    | 109   | 81    | 97    | 83    | 54    | 52    | 201  | 283   | 129   | 205  | 127   | 109   | 89    | Fgf18    |      |
| Fgf2     | 210   | 119   | 153   | 139   | 142   | 202   | 146   | 471  | 503   | 644   | 587   | 324   | 357   | 374   | 170   | 189   | 195   | 165   | 96    | 108   | 109   | 424  | 601   | 450   | 368  | 382   | 311   | 333   | Fgf2     |      |
| Fgf20    | 37    | 12    | 3     | 36    | 13    | 9     | 8     | 64   | 46    | 74    | 60    | 16    | 25    | 27    | 13    | 12    | 14    | 23    | 10    | 20    | 13    | 25   | 33    | 54    | 35   | 68    | 21    | 25    | Fgf20    |      |
| Fgf21    | 1     | 0     | 0     | 2     | 0     | 4     | 0     | 10   | 6     | 5     | 4     | 0     | 0     | 0     | 0     | 4     | 0     | 4     | 0     | 0     | 0     | 2    | 8     | 1     | 0    | 2     | 1     | 4     | Fgf21    |      |
| Fgf22    | 39    | 55    | 82    | 54    | 29    | 66    | 49    | 12   | 12    | 8     | 11    | 4     | 16    | 9     | 42    | 51    | 46    | 73    | 63    | 63    | 39    | 0    | 12    | 5     | 3    | 8     | 22    | 17    | Fgf22    |      |
| Fgf23    | 14    | 9     | 8     | 7     | 13    | 7     | 8     | 18   | 7     | 9     | 18    | 12    | 8     | 20    | 9     | 9     | 13    | 15    | 26    | 16    | 13    | 20   | 10    | 7     | 9    | 8     | 15    | 9     | Fgf23    |      |
| Fgf3     | 87    | 77    | 112   | 81    | 160   | 118   | 108   | 221  | 367   | 289   | 221   | 118   | 73    | 118   | 57    | 62    | 88    | 90    | 122   | 100   | 80    | 426  | 299   | 129   | 364  | 159   | 76    | 82    | Fgf3     |      |
| Fgf4     | 10    | 6     | 22    | 6     | 6     | 5     | 9     | 1    | 2     | 0     | 22    | 0     | 0     | 0     | 5     | 7     | 2     | 6     | 8     | 2     | 5     | 2    | 13    | 0     | 0    | 0     | 0     | 0     | Fgf4     |      |
| Fgf5     | 29    | 27    | 19    | 20    | 44    | 42    | 35    | 26   | 28    | 56    | 55    | 15    | 17    | 16    | 25    | 29    | 27    | 33    | 35    | 22    | 29    | 45   | 54    | 45    | 39   | 23    | 16    | 30    | Fgf5     |      |
| Fgf6     | 3     | 1     | 3     | 4     | 3     | 0     | 1     | 5    | 22    | 0     | 146   | 4     | 3     | 0     | 5     | 11    | 0     | 3     | 2     | 2     | 0     | 10   | 144   | 2     | 5    | 0     | 0     | 0     | 2        | Fgf6 |
| Fgf7     | 136   | 96    | 171   | 243   | 188   | 196   | 223   | 147  | 233   | 172   | 398   | 105   | 125   | 111   | 120   | 118   | 224   | 278   | 250   | 138   | 196   | 204  | 260   | 125   | 170  | 125   | 122   | 114   | Fgf7     |      |
| Fgf8     | 92    | 78    | 96    | 68    | 29    | 48    | 38    | 59   | 54    | 65    | 29    | 124   | 103   | 89    | 54    | 104   | 112   | 59    | 65    | 50    | 33    | 43   | 42    | 56    | 55   | 150   | 92    | 88    | Fgf8     |      |
| Fgf9     | 363   | 319   | 284   | 458   | 479   | 444   | 377   | 403  | 451   | 469   | 485   | 205   | 372   | 194   | 353   | 312   | 304   | 464   | 397   | 394   | 422   | 413  | 482   | 344   | 374  | 275   | 229   | 201   | Fgf9     |      |
| Fgfbp1   | 21    | 23    | 10    | 11    | 21    | 32    | 17    | 53   | 121   | 47    | 101   | 23    | 59    | 33    | 37    | 29    | 8     | 31    | 23    | 16    | 31    | 40   | 129   | 54    | 43   | 27    | 20    | 38    | Fgfbp1   |      |
| Fgfbp3   | 1149  | 945   | 1534  | 1462  | 1907  | 1751  | 1956  | 2434 | 1709  | 2337  | 2224  | 2609  | 2601  | 3279  | 1456  | 749   | 1499  | 1439  | 1732  | 1237  | 2061  | 2379 | 1643  | 2469  | 2725 | 2426  | 2688  | 3387  | Fgfbp3   |      |
| Fgfr1    | 12618 | 13442 | 11830 | 12583 | 11733 | 11397 | 10238 | 9641 | 12031 | 11499 | 11676 | 10202 | 10406 | 9033  | 10995 | 13518 | 12596 | 12909 | 11621 | 9255  | 10507 | 9733 | 11535 | 11246 | 9692 | 12128 | 8825  | 9105  | Fgfr1    |      |
| Fgfr1op2 | 8554  | 7302  | 6889  | 7395  | 6117  | 6515  | 7507  | 6238 | 5535  | 4972  | 5702  | 5734  | 5709  | 5978  | 8587  | 8023  | 6993  | 7082  | 6283  | 7057  | 6958  | 5051 | 5693  | 5406  | 4764 | 6143  | 5965  | 6018  | Fgfr1op2 |      |
| Fgfr2    | 7190  | 6973  | 7891  | 6622  | 5292  | 6582  | 5939  | 6508 | 6864  | 7173  | 6690  | 7808  | 7478  | 7965  | 7011  | 7596  | 6928  | 6919  | 5739  | 5217  | 5672  | 5640 | 7348  | 7684  | 5919 | 7941  | 7460  | 8175  | Fgfr2    |      |
| Fgfr3    | 4109  | 6334  | 7367  | 5820  | 6069  | 6183  | 5939  | 6627 | 6816  | 8127  | 7324  | 12062 | 10150 | 11067 | 4849  | 4618  | 7243  | 5771  | 6742  | 6558  | 5588  | 7478 | 7681  | 10305 | 9031 | 11817 | 11512 | 12040 | Fgfr3    |      |
| Fgfr4    | 200   | 275   | 291   | 296   | 215   | 270   | 140   | 107  | 180   | 100   | 707   | 53    | 124   | 30    | 229   | 317   | 346   | 315   | 261   | 201   | 189   | 219  | 401   | 88    | 81   | 32    | 49    | 49    | Fgfr4    |      |
| Fgfr11   | 2173  | 2756  | 2904  | 2586  | 1847  | 2021  | 1645  | 1198 | 1469  | 1446  | 2065  | 1388  | 1278  | 1190  | 2083  | 2521  | 2710  | 2571  | 2268  | 1489  | 1781  | 1335 | 1437  | 1577  | 1209 | 2193  | 1397  | 1351  | Fgfr11   |      |
| Fgg      | 1     | 3     | 1     | 4     | 0     | 0     | 0     | 2    | 10    | 0     | 4     | 0     | 0     | 2     | 1     | 5     | 3     | 1     | 4     | 2     | 0     | 0    | 6     | 0     | 0    | 0     | 0     | 0     | Fgg      |      |
| Fggv     | 412   | 352   | 286   | 309   | 275   | 347   | 322   | 436  | 369   | 288   | 359   | 378   | 369   | 362   | 386   | 361   | 285   | 310   | 291   | 360   | 293   | 391  | 364   | 311   | 390  | 369   | 425   | 360   | Fggv     |      |
| Fgl1     | 57    | 56    | 53    | 78    | 58    | 43    | 55    | 34   | 32    | 27    | 36    | 12    | 34    | 38    | 51    | 62    | 64    | 50    | 47    | 51    | 70    | 40   | 39    | 41    | 34   | 43    | 36    | 25    | Fgl1     |      |
| Fgl2     | 251   | 347   | 354   | 334   | 392   | 302   | 192   | 404  | 326   | 223   | 378   | 179   | 382   | 206   | 550   | 428   | 322   | 288   | 221   | 384   | 227   | 336  | 386   | 184   | 248  | 222   | 242   | 227   | Fgl2     |      |
| Fgr      | 6     | 12    | 8     | 6     | 8     | 7     | 13    | 6    | 14    | 23    | 16    | 15    | 8     | 11    | 3     | 9     | 3     | 8     | 4     | 9     | 5     | 13   | 13    | 12    | 2    | 21    | 5     | 5     | Fgr      |      |
| Fh1      | 6240  | 5890  | 5532  | 4588  | 4342  | 4685  | 4434  | 5169 | 4752  | 3961  | 4270  | 4615  | 4604  | 4765  | 5970  | 5661  | 4800  | 4485  | 4648  | 5149  | 4303  | 4223 | 5036  | 4469  | 4272 | 5323  | 5226  | 5096  | Fh1      |      |
| Fhd1     | 127   | 145   | 118   | 145   | 236   | 195   | 123   | 238  | 210   | 274   | 283   | 244   | 395   | 161   | 210   | 235   | 161   | 131   | 136   | 172   | 168   | 262  | 337   | 168   | 206  | 125   | 203   | 208   | Fhd1     |      |
| Fhd1c    | 772   | 883   | 888   | 725   | 860   | 734   | 588   | 569  | 703   | 630   | 658   | 451   | 683   | 434   | 766   | 910   | 831   | 841   | 768   | 679   | 611   | 622  | 619   | 512   | 505  | 444   | 443   | 560   | Fhd1c    |      |
| Fhit     | 83    | 89    | 85    | 93    | 104   | 83    | 102   | 116  | 128   | 75    | 104   | 92    | 94    | 66    | 108   | 83    | 71    | 99    | 88    | 97    | 114   | 107  | 110   | 78    | 94   | 66    | 89    | 87    | Fhit     |      |
| Fh11     | 6756  | 7007  | 6765  | 7751  | 9247  | 8694  | 10963 | 7851 | 7777  | 7844  | 7900  | 7603  | 6889  | 7904  | 7267  | 6999  | 7661  | 8832  | 9826  | 10478 | 10105 | 7930 | 8700  | 7952  | 8872 | 7294  | 7176  | 7533  | Fh11     |      |
| Fh12     | 235   | 220   | 208   | 138   | 187   | 163   | 102   | 271  | 361   | 304   | 353   | 167   | 266   | 170   | 196   | 253   | 147   | 143   | 125   | 109   | 99    | 296  | 438   | 284   | 211  | 222   | 237   | 178   | Fh12     |      |
| Fh13     | 811   | 1021  | 1142  | 835   | 554   | 616   | 432   | 495  | 646   | 592   | 839   | 542   | 862   | 541   | 719   | 970   | 936   | 763   | 588   | 450   | 534   | 369  | 729   | 692   | 441  | 864   | 715   | 572   | Fh13     |      |
| Fh14     | 135   | 67    | 73    | 88    | 66    | 81    | 102   | 115  | 124   | 83    | 92    | 91    | 86    | 115   | 105   | 86    | 92    | 77    | 74    | 94    | 105   | 104  | 133   | 96    | 116  | 94    | 110   | 80    | Fh14     |      |
| Fh15     | 1     | 0     | 0     | 0     | 1     | 0     | 0     | 0    | 0     | 8     | 14    | 0     | 0     | 0     | 0     | 1     | 1     | 0     | 0     | 0     | 0     | 8    | 4     | 3     | 0    | 0     | 0     | 0     | Fh15     |      |
| Fhod1    | 2112  | 2656  | 3226  | 2651  | 1851  | 2034  | 1704  | 808  | 1174  | 1103  | 1142  | 1367  | 1424  | 1102  | 1750  | 2636  | 2826  | 2423  | 2125  | 1654  | 1737  | 929  | 1135  | 1277  | 1058 | 1803  | 1232  | 1272  | Fhod1    |      |
| Fhod3    | 2188  | 2315  | 3219  | 2562  | 3026  | 2670  | 2703  | 2503 | 2465  | 2712  | 2515  | 2927  | 2615  | 2815  | 2484  | 2203  | 2800  | 2464  | 3016  | 2619  | 2774  | 2867 | 2333  | 2798  | 2910 | 2471  | 2752  | 2964  | Fhod3    |      |
| Fibcd1   | 341   | 515   | 647   | 713   | 875   | 907   | 659   | 499  | 517   | 591   | 462   | 635   | 686   | 534   | 471   | 443   | 791   | 801   | 923   | 743   | 819   | 802  | 520   | 686   | 770  | 122   | 528   | 525   | Fibcd1   |      |
| Fibin    | 526   | 436   | 475   | 307   | 128   | 541   | 55    | 891  | 1698  | 1281  | 4483  | 607   | 1546  | 694   | 568   | 714   | 262   | 453   | 274   | 71    | 37    | 1303 | 3581  | 900   | 1026 | 752   | 704   | 824   | Fibin    |      |
| Fibp     | 2722  | 3499  | 2648  | 3169  | 2892  | 3132  |       |      |       |       |       |       |       |       |       |       |       |       |       |       |       |      |       |       |      |       |       |       |          |      |

|        |       |       |       |       |       |       |       |       |       |       |       |       |       |       |       |       |       |       |       |       |       |       |       |       |       |       |       |        |        |
|--------|-------|-------|-------|-------|-------|-------|-------|-------|-------|-------|-------|-------|-------|-------|-------|-------|-------|-------|-------|-------|-------|-------|-------|-------|-------|-------|-------|--------|--------|
| Fkbp9  | 8522  | 7186  | 7493  | 4994  | 3660  | 5565  | 2890  | 7858  | 10031 | 8237  | 11706 | 6967  | 8486  | 6622  | 7812  | 9538  | 5398  | 5852  | 3232  | 3334  | 2966  | 7812  | 11378 | 7588  | 6810  | 8339  | 7699  | 7543   | Fkbp9  |
| Fkbp1  | 563   | 783   | 706   | 647   | 489   | 604   | 573   | 497   | 559   | 434   | 464   | 489   | 497   | 584   | 634   | 759   | 709   | 609   | 574   | 644   | 673   | 428   | 489   | 503   | 452   | 574   | 592   | 557    | Fkbp1  |
| Fkbp2  | 784   | 843   | 920   | 1007  | 1185  | 1070  | 889   | 2560  | 2250  | 2632  | 2570  | 2498  | 2371  | 2510  | 907   | 778   | 1055  | 964   | 1138  | 1047  | 960   | 2904  | 2531  | 2562  | 2505  | 2508  | 2597  | 2648   | Fkbp2  |
| Fkbp3  | 3483  | 3097  | 3161  | 2886  | 2891  | 3318  | 3313  | 4710  | 4064  | 3913  | 3890  | 4294  | 3816  | 4576  | 3630  | 3135  | 2790  | 2610  | 3087  | 3435  | 3304  | 4248  | 3924  | 3755  | 3731  | 3390  | 4717  | 4565   | Fkbp3  |
| Fkbp4  | 0     | 1     | 0     | 0     | 0     | 0     | 1     | 1     | 1     | 0     | 0     | 2     | 1     | 1     | 3     | 0     | 0     | 2     | 0     | 0     | 0     | 0     | 0     | 3     | 0     | 1     | 2     | 0      | Fkbp4  |
| Fkbp5  | 964   | 1164  | 1122  | 1102  | 1059  | 1118  | 1048  | 1502  | 1561  | 1669  | 1465  | 1795  | 1591  | 1686  | 901   | 900   | 1209  | 1081  | 1220  | 937   | 1098  | 1576  | 1425  | 1694  | 1771  | 1539  | 1581  | 1680   | Fkbp5  |
| Fkbp6  | 2628  | 3028  | 2646  | 3003  | 2617  | 2530  | 2476  | 2364  | 2589  | 2645  | 2742  | 2509  | 2624  | 2448  | 2461  | 2929  | 2710  | 2995  | 2837  | 2523  | 2578  | 2787  | 2717  | 2599  | 2855  | 2726  | 2410  | 2490   | Fkbp6  |
| Fkbp7  | 0     | 0     | 0     | 0     | 0     | 0     | 1     | 0     | 0     | 0     | 0     | 0     | 0     | 0     | 1     | 0     | 0     | 0     | 0     | 0     | 0     | 2     | 1     | 0     | 0     | 0     | 0     | 0      | Fkbp7  |
| Fkbp8  | 5447  | 396   | 781   | 415   | 425   | 402   | 279   | 862   | 1025  | 971   | 1429  | 777   | 1107  | 751   | 493   | 630   | 388   | 391   | 345   | 409   | 328   | 1033  | 1182  | 1028  | 822   | 1316  | 737   | 853    | Fkbp8  |
| Fkbp9  | 5447  | 6765  | 6978  | 6161  | 6230  | 6025  | 5639  | 5901  | 6897  | 7076  | 6640  | 7493  | 7192  | 7201  | 5234  | 5969  | 6953  | 6122  | 6770  | 5577  | 5732  | 6916  | 6649  | 7483  | 7214  | 7330  | 7254  | 7220   | Fkbp9  |
| Fkbp10 | 76631 | 75685 | 48419 | 45525 | 40606 | 53312 | 35525 | 57968 | 72980 | 60436 | 68961 | 69483 | 81585 | 59190 | 66527 | 83224 | 45236 | 46857 | 42390 | 41013 | 40067 | 50319 | 74261 | 56719 | 58769 | 43208 | 77469 | 62386  | Fkbp10 |
| Fkbp11 | 21058 | 22983 | 13453 | 16233 | 13398 | 18160 | 12635 | 10063 | 15796 | 13648 | 16638 | 12502 | 15660 | 11162 | 18327 | 24853 | 14202 | 17787 | 13858 | 12449 | 13928 | 12897 | 14856 | 12081 | 12717 | 8399  | 13709 | 10980  | Fkbp11 |
| Fkbp12 | 3646  | 4367  | 4644  | 3411  | 2860  | 4091  | 1753  | 3529  | 6504  | 4566  | 11184 | 3780  | 5271  | 3027  | 3513  | 5461  | 3752  | 4493  | 2876  | 2154  | 2073  | 4614  | 10245 | 4772  | 4163  | 2455  | 3765  | 3310   | Fkbp12 |
| Fkbp13 | 2824  | 3429  | 3741  | 3915  | 3715  | 3406  | 3077  | 1713  | 2209  | 2377  | 2254  | 2419  | 2168  | 2191  | 2664  | 3076  | 3870  | 3581  | 3879  | 2987  | 3240  | 2239  | 2236  | 2434  | 2413  | 2606  | 2244  | 2195   | Fkbp13 |
| Fkbp14 | 4451  | 5233  | 5008  | 5182  | 5332  | 5032  | 4789  | 3623  | 4299  | 4136  | 3992  | 4428  | 4158  | 4205  | 4265  | 4689  | 5026  | 5230  | 5356  | 4597  | 5051  | 4288  | 4380  | 4108  | 4482  | 4806  | 4323  | 4376   | Fkbp14 |
| Fkbp15 | 1069  | 1329  | 1201  | 1483  | 1746  | 1568  | 1302  | 810   | 1129  | 1294  | 1076  | 1196  | 1151  | 955   | 1006  | 1105  | 1627  | 1643  | 1771  | 1340  | 1540  | 1135  | 970   | 1274  | 1344  | 346   | 1120  | 889    | Fkbp15 |
| Fkbp16 | 6549  | 4942  | 5457  | 4866  | 6259  | 6782  | 5916  | 11163 | 11603 | 9541  | 13440 | 7786  | 9412  | 7751  | 6394  | 6939  | 4722  | 5657  | 5629  | 5944  | 5942  | 10136 | 13180 | 7896  | 8896  | 8038  | 7772  | 6773   | Fkbp16 |
| Fkbp17 | 8022  | 6300  | 6442  | 5530  | 4648  | 5369  | 5879  | 7544  | 6026  | 5724  | 5363  | 7168  | 7136  | 7453  | 7611  | 7103  | 5626  | 5011  | 5548  | 7047  | 5487  | 5964  | 6592  | 6083  | 5174  | 8173  | 8451  | 8738   | Fkbp17 |
| Fkbp18 | 1774  | 1621  | 2228  | 2091  | 2044  | 2029  | 1779  | 1356  | 1475  | 1998  | 2083  | 1965  | 1895  | 2033  | 1631  | 2092  | 1998  | 2135  | 1813  | 1400  | 1984  | 2181  | 1690  | 2116  | 2078  | 1761  | 1837  | 2023   | Fkbp18 |
| Fkbp19 | 18    | 5     | 16    | 7     | 13    | 16    | 9     | 13    | 17    | 14    | 42    | 9     | 17    | 9     | 7     | 16    | 0     | 8     | 4     | 9     | 8     | 23    | 14    | 18    | 24    | 14    | 6     | Fkbp19 |        |
| Fkbp20 | 69    | 68    | 93    | 78    | 90    | 56    | 64    | 54    | 55    | 69    | 76    | 63    | 87    | 67    | 86    | 79    | 101   | 94    | 68    | 60    | 65    | 58    | 69    | 81    | 47    | 57    | 53    | 110    | Fkbp20 |
| Fkbp21 | 780   | 980   | 1058  | 645   | 703   | 692   | 564   | 535   | 690   | 736   | 1025  | 733   | 904   | 620   | 630   | 1045  | 870   | 731   | 706   | 452   | 612   | 747   | 764   | 854   | 628   | 833   | 652   | 602    | Fkbp21 |
| Fkbp22 | 3511  | 2991  | 3032  | 3268  | 3076  | 3075  | 3408  | 1599  | 1570  | 1463  | 1468  | 1827  | 1803  | 1964  | 3341  | 3312  | 3161  | 3317  | 3014  | 3272  | 3363  | 1997  | 1430  | 1609  | 1816  | 2064  | 1876  | 2172   | Fkbp22 |
| Fkbp23 | 295   | 294   | 358   | 321   | 311   | 236   | 256   | 195   | 185   | 232   | 185   | 174   | 205   | 180   | 249   | 316   | 202   | 370   | 257   | 255   | 290   | 271   | 249   | 164   | 253   | 157   | 163   | 163    | Fkbp23 |
| Fkbp24 | 7157  | 8664  | 7941  | 8450  | 8917  | 8685  | 8079  | 7293  | 7654  | 8687  | 7287  | 9127  | 8540  | 8636  | 7199  | 7041  | 8952  | 8153  | 9606  | 8518  | 8603  | 8584  | 6830  | 8532  | 8631  | 8513  | 8638  | 8853   | Fkbp24 |
| Fkbp25 | 384   | 511   | 476   | 532   | 542   | 477   | 456   | 506   | 552   | 592   | 635   | 472   | 598   | 567   | 400   | 445   | 491   | 464   | 538   | 632   | 475   | 485   | 617   | 556   | 566   | 747   | 559   | 523    | Fkbp25 |
| Fkbp26 | 331   | 373   | 388   | 421   | 442   | 317   | 451   | 492   | 421   | 588   | 536   | 545   | 540   | 672   | 327   | 212   | 532   | 311   | 402   | 494   | 423   | 436   | 427   | 662   | 528   | 545   | 535   | 610    | Fkbp26 |
| Fkbp27 | 203   | 190   | 70    | 78    | 151   | 161   | 50    | 414   | 506   | 284   | 443   | 164   | 507   | 216   | 264   | 257   | 87    | 129   | 37    | 62    | 45    | 421   | 447   | 145   | 191   | 115   | 225   | 221    | Fkbp27 |
| Fkbp28 | 3941  | 3679  | 4992  | 5054  | 5469  | 4770  | 5140  | 3300  | 2808  | 3639  | 3118  | 4393  | 3999  | 4604  | 4118  | 3808  | 5261  | 4818  | 5227  | 3859  | 5087  | 4756  | 2624  | 3967  | 3916  | 3583  | 4379  | 4494   | Fkbp28 |
| Fkbp29 | 343   | 461   | 601   | 882   | 1604  | 1028  | 1000  | 485   | 607   | 714   | 683   | 449   | 449   | 391   | 410   | 421   | 687   | 1073  | 1194  | 988   | 1186  | 989   | 592   | 681   | 779   | 370   | 442   | 312    | Fkbp29 |
| Fkbp30 | 14822 | 10978 | 12020 | 13419 | 14699 | 13673 | 16561 | 14337 | 12545 | 12891 | 12315 | 12796 | 12624 | 13253 | 14135 | 12603 | 12599 | 14038 | 14341 | 13665 | 16456 | 11730 | 13328 | 13422 | 11195 | 11595 | 12487 | Fkbp30 |        |
| Fkbp31 | 3548  | 3373  | 3648  | 3294  | 2908  | 3087  | 2738  | 2926  | 3573  | 3518  | 3917  | 3565  | 3822  | 3101  | 2851  | 3808  | 3023  | 3220  | 3014  | 2350  | 2641  | 3227  | 3834  | 3603  | 3048  | 4147  | 3264  | 3444   | Fkbp31 |
| Fkbp32 | 1025  | 1069  | 1059  | 839   | 732   | 1377  | 444   | 1873  | 2301  | 2113  | 2297  | 1627  | 2411  | 1868  | 1458  | 1377  | 705   | 1261  | 489   | 592   | 547   | 2904  | 3199  | 2080  | 2228  | 1102  | 1958  | 1741   | Fkbp32 |
| Fkbp33 | 43    | 35    | 6     | 26    | 27    | 26    | 11    | 105   | 103   | 113   | 129   | 20    | 43    | 18    | 53    | 44    | 32    | 44    | 20    | 20    | 7     | 52    | 194   | 64    | 26    | 24    | 5     | 7      | Fkbp33 |
| Fkbp34 | 2     | 1     | 0     | 4     | 0     | 1     | 0     | 0     | 3     | 0     | 0     | 0     | 1     | 1     | 0     | 0     | 0     | 0     | 0     | 0     | 0     | 0     | 3     | 1     | 1     | 0     | 2     | 0      | Fkbp34 |
| Fkbp35 | 12    | 21    | 47    | 23    | 17    | 36    | 8     | 51    | 39    | 46    | 50    | 23    | 56    | 32    | 37    | 35    | 12    | 29    | 5     | 18    | 12    | 60    | 60    | 24    | 17    | 18    | 36    | 31     | Fkbp35 |
| Fkbp36 | 106   | 79    | 60    | 41    | 64    | 71    | 47    | 114   | 145   | 103   | 133   | 71    | 119   | 85    | 83    | 131   | 60    | 102   | 45    | 35    | 33    | 95    | 170   | 105   | 74    | 131   | 102   | 84     | Fkbp36 |
| Fkbp37 | 21    | 3     | 0     | 20    | 0     | 0     | 0     | 93    | 50    | 126   | 54    | 0     | 16    | 13    | 8     | 12    | 2     | 0     | 0     | 0     | 0     | 2     | 126   | 128   | 0     | 62    | 0     | 1      | Fkbp37 |
| Fkbp38 | 0     | 1     | 0     | 0     | 0     | 0     | 0     | 0     | 0     | 0     | 1     | 0     | 0     | 0     | 0     | 2     | 0     | 0     | 0     | 5     | 0     | 3     | 1     | 0     | 0     | 1     | 0     | 1      | Fkbp38 |
| Fkbp39 | 772   | 1070  | 1059  | 718   | 497   | 957   | 313   | 664   | 1018  | 879   | 2052  | 1031  | 1427  | 951   | 1182  | 1276  | 984   | 1091  | 425   | 469   | 369   | 1377  | 1939  | 1017  | 1049  | 639   | 1347  | 999    | Fkbp39 |
| Fkbp40 | 11205 | 7942  | 10237 | 10385 | 9781  | 10925 | 11984 | 11019 | 9744  | 9230  | 11075 | 10620 | 10455 | 11707 | 10929 | 9277  | 9755  | 10310 | 9824  | 10102 | 11353 | 9672  | 10183 | 9896  | 10190 | 10430 | 10667 | 10837  | Fkbp40 |
| Fkbp41 | 8     | 8     | 7     | 9     | 2     | 9     | 4     | 10    | 9     | 6     | 4     | 1     | 9     | 7     | 3     | 9     | 7     | 8     | 2     | 4     | 0     | 8     | 7     | 2     | 1     | 0     | 3     | 8      | Fkbp41 |
| Fkbp42 | 41956 | 45103 | 36707 | 37820 | 24754 | 43658 | 18471 | 31036 | 4708  | 53065 | 71870 | 51538 | 60510 | 47135 | 36644 | 55598 | 34078 | 46425 | 24285 | 18413 | 19461 | 47534 | 60609 | 50959 | 45031 | 36880 | 49015 | 42671  | Fkbp42 |
| Fkbp43 | 317   | 384   | 285   | 386   | 388   | 342   | 364   | 228   | 208   | 210   | 194   | 193   | 236   | 204   | 353   | 329   | 304   | 341   | 344   | 373   | 390   | 207   | 230   | 183   | 225   | 148   | 218   | 212    | Fkbp43 |
| Fkbp44 | 2330  | 2505  | 2729  | 2691  | 2305  | 2161  | 2386  | 1337  | 1280  | 1272  | 1176  | 1429  | 1390  | 1464  | 2582  | 2263  | 2819  | 2437  | 2383  | 2370  | 2434  | 1390  | 1280  | 1330  | 1339  | 1575  | 1474  | 1589   | Fkbp44 |
| Fkbp45 | 4941  | 5212  | 5156  | 5468  | 6041  | 5065  | 4584  | 4008  | 4963  | 5691  | 5882  | 4165  | 4685  | 4039  | 4804  | 5920  | 5372  | 5943  | 5033  | 4196  | 4704  | 5267  | 4853  | 4984  | 5086  | 4527  | 4038  | 4156   | Fkbp45 |
| Fkbp46 | 26813 | 21693 | 23326 | 30821 | 41919 | 39087 | 43409 | 66072 | 54651 | 57404 | 50971 | 51287 | 44719 | 57248 | 30387 | 22935 | 27983 | 33277 | 37477 | 42027 | 42906 | 66581 | 51486 | 55026 | 65499 | 43837 | 48162 | 48087  | Fkbp46 |
| Fkbp47 | 11808 | 10655 | 10367 | 10916 | 10780 | 11457 | 11462 | 11883 | 10828 | 11160 | 10800 | 12852 | 11624 | 12927 | 11214 | 10509 | 10624 | 10173 | 11065 | 10651 | 11448 | 12714 | 10092 | 11431 | 12164 | 11647 | 12857 | 12570  | Fkbp47 |
| Fkbp48 | 2     | 1     | 3     | 0     |       |       |       |       |       |       |       |       |       |       |       |       |       |       |       |       |       |       |       |       |       |       |       |        |        |

|          |       |       |       |       |        |       |       |      |      |       |      |       |      |       |       |      |       |       |       |       |       |       |      |       |       |       |       |       |          |       |
|----------|-------|-------|-------|-------|--------|-------|-------|------|------|-------|------|-------|------|-------|-------|------|-------|-------|-------|-------|-------|-------|------|-------|-------|-------|-------|-------|----------|-------|
| Foxd1    | 1351  | 1389  | 1892  | 982   | 692    | 714   | 435   | 1022 | 1136 | 915   | 1444 | 1108  | 1276 | 1206  | 1334  | 1537 | 1429  | 1022  | 364   | 489   | 408   | 1303  | 1312 | 981   | 889   | 1689  | 1630  | 1265  | Foxd1    |       |
| Foxd2    | 325   | 275   | 394   | 225   | 128    | 117   | 97    | 233  | 243  | 267   | 271  | 321   | 308  | 236   | 274   | 458  | 286   | 274   | 86    | 129   | 69    | 226   | 241  | 311   | 181   | 420   | 372   | 323   | Foxd2    |       |
| Foxd3    | 1     | 3     | 2     | 1     | 3      | 0     | 0     | 5    | 1    | 2     | 3    | 0     | 2    | 0     | 5     | 1    | 3     | 2     | 0     | 2     | 0     | 5     | 4    | 1     | 1     | 1     | 0     | 0     | 1        | Foxd3 |
| Foxd4    | 5     | 13    | 10    | 9     | 17     | 6     | 1     | 6    | 6    | 16    | 6    | 4     | 24   | 6     | 11    | 8    | 9     | 4     | 5     | 2     | 3     | 25    | 12   | 1     | 10    | 0     | 0     | 1     | Foxd4    |       |
| Foxe1    | 13    | 15    | 12    | 8     | 12     | 7     | 12    | 28   | 59   | 2     | 48   | 2     | 1    | 2     | 13    | 16   | 1     | 10    | 16    | 16    | 4     | 7     | 46   | 5     | 1     | 8     | 0     | 0     | Foxe1    |       |
| Foxe3    | 0     | 3     | 0     | 1     | 1      | 0     | 0     | 0    | 0    | 0     | 1    | 0     | 0    | 0     | 1     | 2    | 1     | 0     | 0     | 0     | 0     | 0     | 2    | 0     | 1     | 2     | 0     | 2     | Foxe3    |       |
| Foxf1    | 187   | 38    | 34    | 21    | 32     | 29    | 27    | 140  | 132  | 60    | 190  | 16    | 9    | 22    | 32    | 167  | 30    | 22    | 26    | 21    | 16    | 63    | 93   | 37    | 9     | 110   | 13    | 6     | Foxf1    |       |
| Foxf2    | 427   | 367   | 684   | 419   | 472    | 364   | 387   | 562  | 678  | 566   | 744  | 613   | 492  | 523   | 340   | 588  | 470   | 406   | 464   | 357   | 413   | 703   | 603  | 493   | 503   | 741   | 580   | 477   | Foxf2    |       |
| Foxg1    | 4721  | 3227  | 3298  | 7658  | 7234   | 6840  | 11615 | 5652 | 6212 | 8293  | 5817 | 11600 | 3536 | 12000 | 3728  | 1627 | 6504  | 7080  | 9288  | 5816  | 9919  | 5872  | 3351 | 12436 | 11225 | 14266 | 5950  | 8291  | Foxg1    |       |
| Foxh1    | 7     | 7     | 7     | 3     | 7      | 7     | 10    | 6    | 9    | 1     | 8    | 8     | 11   | 6     | 4     | 6    | 5     | 0     | 3     | 1     | 3     | 7     | 3    | 3     | 0     | 5     | 9     | 1     | Foxh1    |       |
| Foxi1    | 3     | 3     | 0     | 0     | 0      | 0     | 0     | 0    | 8    | 0     | 6    | 0     | 6    | 0     | 3     | 0    | 0     | 0     | 3     | 0     | 0     | 12    | 4    | 0     | 5     | 0     | 0     | 0     | Foxi1    |       |
| Foxi2    | 3     | 2     | 9     | 1     | 0      | 4     | 1     | 4    | 9    | 0     | 8    | 10    | 5    | 5     | 0     | 2    | 0     | 0     | 0     | 2     | 1     | 0     | 6    | 9     | 3     | 5     | 3     | 4     | Foxi2    |       |
| Foxi3    | 30    | 2     | 7     | 2     | 3      | 1     | 1     | 12   | 21   | 8     | 6    | 3     | 2    | 1     | 3     | 8    | 1     | 6     | 1     | 2     | 0     | 0     | 18   | 8     | 1     | 7     | 2     | 1     | Foxi3    |       |
| Foxj1    | 1095  | 1811  | 1709  | 1942  | 1863   | 1830  | 1525  | 1172 | 1148 | 1580  | 1070 | 1614  | 1822 | 1092  | 1313  | 1639 | 2022  | 1990  | 2051  | 1616  | 1634  | 1278  | 1665 | 1311  | 1326  | 1359  | 1181  | 1304  | Foxj1    |       |
| Foxj2    | 1571  | 1927  | 2108  | 2609  | 2661   | 2254  | 2224  | 1508 | 1619 | 2009  | 2075 | 1623  | 1594 | 1508  | 1564  | 1970 | 2333  | 2552  | 2569  | 1911  | 2325  | 2104  | 1690 | 1899  | 1896  | 1599  | 1378  | 1482  | Foxj2    |       |
| Foxj3    | 4854  | 3962  | 5004  | 5635  | 6114   | 5486  | 6055  | 5424 | 5169 | 5875  | 5438 | 5831  | 5066 | 5750  | 4615  | 4355 | 5339  | 5613  | 6003  | 4757  | 6061  | 6259  | 5143 | 5965  | 6121  | 5588  | 5080  | 5543  | Foxj3    |       |
| Foxk1    | 5678  | 7470  | 9407  | 8862  | 7557   | 7038  | 6143  | 3791 | 4797 | 5568  | 5962 | 5765  | 5722 | 5098  | 5310  | 6940 | 9051  | 8974  | 7677  | 5172  | 6848  | 5755  | 4822 | 5631  | 5884  | 4987  | 5190  | 5314  | Foxk1    |       |
| Foxk2    | 10672 | 11968 | 11577 | 12476 | 112156 | 12066 | 12100 | 9213 | 9300 | 10445 | 9030 | 10935 | 9347 | 10676 | 10010 | 9990 | 12557 | 11871 | 13025 | 10702 | 12283 | 9824  | 8765 | 10646 | 10791 | 10942 | 10062 | 10936 | Foxk2    |       |
| Foxl1    | 99    | 86    | 100   | 43    | 43     | 39    | 28    | 48   | 119  | 42    | 128  | 73    | 74   | 34    | 83    | 154  | 109   | 68    | 21    | 29    | 30    | 90    | 98   | 62    | 44    | 126   | 109   | 28    | Foxl1    |       |
| Foxl2    | 302   | 236   | 428   | 133   | 133    | 173   | 83    | 330  | 484  | 273   | 384  | 470   | 523  | 412   | 207   | 286  | 290   | 165   | 77    | 94    | 72    | 259   | 331  | 516   | 290   | 527   | 533   | 398   | Foxl2    |       |
| Foxm1    | 1     | 1     | 6     | 0     | 4      | 0     | 0     | 5    | 1    | 3     | 2    | 1     | 3    | 1     | 5     | 3    | 1     | 1     | 2     | 0     | 0     | 5     | 3    | 1     | 0     | 3     | 0     | 1     | Foxm1    |       |
| Foxm1    | 4505  | 4681  | 5465  | 4469  | 3353   | 3790  | 3933  | 4662 | 5178 | 5479  | 4513 | 8530  | 6339 | 8115  | 3512  | 3967 | 5014  | 3867  | 4369  | 3396  | 3866  | 4346  | 4158 | 6948  | 5909  | 8338  | 7415  | 8119  | Foxm1    |       |
| Foxn1    | 0     | 2     | 0     | 0     | 0      | 0     | 0     | 9    | 8    | 5     | 1    | 0     | 2    | 1     | 1     | 3    | 1     | 0     | 0     | 0     | 0     | 0     | 15   | 6     | 0     | 3     | 2     | 0     | Foxn1    |       |
| Foxn2    | 2420  | 1941  | 2430  | 2642  | 2465   | 2806  | 2761  | 1922 | 1846 | 1750  | 2084 | 2077  | 2224 | 2287  | 2421  | 2244 | 2323  | 2663  | 2491  | 2329  | 2630  | 1853  | 1835 | 1860  | 2169  | 2002  | 2048  | 2332  | Foxn2    |       |
| Foxn3    | 5713  | 5467  | 6865  | 7118  | 6717   | 6745  | 6738  | 5398 | 5058 | 5692  | 5602 | 6251  | 5642 | 6125  | 5844  | 5530 | 7004  | 7039  | 6663  | 5872  | 6786  | 5803  | 4893 | 6034  | 6286  | 6240  | 5970  | 6334  | Foxn3    |       |
| Foxn4    | 163   | 222   | 655   | 197   | 137    | 206   | 63    | 153  | 111  | 173   | 112  | 112   | 384  | 533   | 367   | 195  | 221   | 439   | 132   | 207   | 168   | 141   | 234  | 106   | 243   | 187   | 57    | 450   | 420      | Foxn4 |
| Foxo1    | 3505  | 3445  | 3914  | 3688  | 3095   | 3215  | 2883  | 1719 | 1926 | 1937  | 2112 | 1574  | 2110 | 1526  | 3413  | 4456 | 3363  | 3807  | 2754  | 2443  | 2938  | 2015  | 2059 | 1816  | 1784  | 2106  | 1525  | 1543  | Foxo1    |       |
| Foxo3    | 4991  | 5300  | 5818  | 7051  | 6712   | 5917  | 6217  | 3088 | 3685 | 4030  | 4347 | 3189  | 3540 | 3355  | 4735  | 5466 | 6153  | 7071  | 6606  | 4910  | 6543  | 3586  | 3809 | 3934  | 3691  | 2968  | 2800  | 3616  | Foxo3    |       |
| Foxo4    | 4492  | 4683  | 5008  | 4933  | 3915   | 3814  | 3758  | 2803 | 3144 | 3197  | 3919 | 2965  | 3289 | 3051  | 3972  | 4597 | 4976  | 4260  | 4422  | 3836  | 4329  | 2486  | 3407 | 3679  | 2719  | 3967  | 2903  | 3215  | Foxo4    |       |
| Foxo6    | 798   | 1097  | 737   | 1461  | 1528   | 1246  | 1274  | 692  | 946  | 942   | 813  | 719   | 518  | 575   | 713   | 743  | 1163  | 1558  | 1637  | 1335  | 1488  | 839   | 635  | 1168  | 1268  | 878   | 425   | 526   | Foxo6    |       |
| Foxp1    | 6583  | 5782  | 8056  | 7473  | 6222   | 6574  | 6488  | 4797 | 5225 | 6091  | 6762 | 5954  | 6492 | 5874  | 6253  | 7198 | 7409  | 7283  | 6159  | 5266  | 6596  | 5690  | 5040 | 6024  | 6782  | 6292  | 5933  | Foxp1 |          |       |
| Foxp2    | 5546  | 4537  | 5866  | 5252  | 5136   | 6341  | 5350  | 9263 | 7874 | 8235  | 8471 | 7743  | 7872 | 7377  | 5751  | 6372 | 5262  | 5367  | 4988  | 5281  | 5095  | 11650 | 8124 | 7708  | 10094 | 6601  | 8559  | 7471  | Foxp2    |       |
| Foxp3    | 0     | 3     | 6     | 8     | 5      | 2     | 4     | 6    | 8    | 5     | 1    | 2     | 5    | 6     | 5     | 2    | 2     | 1     | 2     | 3     | 8     | 8     | 10   | 11    | 2     | 7     | 0     | 11    | Foxp3    |       |
| Foxp4    | 5758  | 7898  | 9386  | 7746  | 6222   | 6061  | 4759  | 4451 | 5899 | 6660  | 7018 | 7285  | 6634 | 6118  | 5413  | 7802 | 8269  | 7230  | 7253  | 4611  | 5469  | 5987  | 5022 | 7459  | 6819  | 9252  | 6738  | 6251  | Foxp4    |       |
| Foxq1    | 130   | 160   | 228   | 179   | 308    | 239   | 191   | 263  | 225  | 249   | 241  | 279   | 300  | 149   | 177   | 185  | 199   | 232   | 236   | 231   | 281   | 272   | 269  | 305   | 309   | 959   | 275   | 272   | Foxq1    |       |
| Foxr1    | 3     | 0     | 0     | 0     | 0      | 0     | 0     | 0    | 1    | 0     | 0    | 0     | 1    | 0     | 0     | 0    | 0     | 0     | 0     | 0     | 0     | 2     | 1    | 0     | 3     | 0     | 0     | 0     | Foxr1    |       |
| Foxr2    | 77    | 83    | 120   | 124   | 98     | 144   | 182   | 68   | 44   | 67    | 63   | 139   | 105  | 88    | 99    | 84   | 98    | 114   | 86    | 100   | 123   | 72    | 52   | 76    | 121   | 94    | 123   | 109   | Foxr2    |       |
| Foxred1  | 2933  | 3137  | 3130  | 3025  | 2824   | 2931  | 2892  | 3120 | 3065 | 3070  | 3148 | 3453  | 3348 | 3441  | 2908  | 2766 | 3179  | 2864  | 2877  | 2819  | 2965  | 3193  | 2954 | 3268  | 3282  | 3568  | 3509  | 3285  | Foxred1  |       |
| Foxred2  | 1494  | 1441  | 1441  | 1338  | 1748   | 1629  | 1791  | 1093 | 1399 | 1460  | 1163 | 1344  | 1235 | 1339  | 1370  | 1430 | 1494  | 1700  | 1655  | 1364  | 1762  | 1348  | 1106 | 1334  | 1145  | 1279  | 1240  | 1262  | Foxred2  |       |
| Foxs1    | 18    | 32    | 43    | 16    | 54     | 35    | 18    | 49   | 64   | 53    | 67   | 83    | 70   | 71    | 11    | 18   | 28    | 34    | 28    | 40    | 32    | 35    | 65   | 72    | 96    | 71    | 76    | 70    | Foxs1    |       |
| Fpqs     | 1066  | 1195  | 1113  | 946   | 705    | 822   | 596   | 739  | 882  | 846   | 1024 | 899   | 864  | 756   | 924   | 1196 | 890   | 916   | 697   | 702   | 661   | 864   | 981  | 941   | 820   | 1089  | 803   | 767   | Fpqs     |       |
| Fpqt     | 1404  | 1189  | 1178  | 1353  | 1316   | 1225  | 1593  | 2246 | 1730 | 1526  | 1435 | 1677  | 1457 | 1733  | 1623  | 1230 | 1284  | 1323  | 1414  | 1625  | 1469  | 1821  | 1665 | 1572  | 1676  | 1548  | 1620  | 1797  | Fpqt     |       |
| Fpr1     | 2     | 0     | 0     | 0     | 1      | 3     | 0     | 0    | 1    | 3     | 0    | 1     | 5    | 0     | 0     | 0    | 0     | 2     | 0     | 0     | 0     | 8     | 4    | 6     | 1     | 2     | 1     | 0     | Fpr1     |       |
| Fpr2     | 3     | 2     | 0     | 4     | 3      | 2     | 0     | 1    | 2    | 2     | 3    | 1     | 3    | 1     | 0     | 1    | 0     | 2     | 3     | 0     | 3     | 3     | 6    | 1     | 1     | 3     | 2     | 2     | Fpr2     |       |
| Fra10ac1 | 2079  | 1786  | 2450  | 2112  | 2074   | 2016  | 2421  | 2777 | 2347 | 2530  | 2272 | 2830  | 2470 | 3061  | 2120  | 1949 | 2254  | 2004  | 2276  | 2269  | 2271  | 2445  | 2333 | 2742  | 2548  | 2892  | 2759  | 2826  | Fra10ac1 |       |
| Fras1    | 5305  | 4940  | 2781  | 3035  | 3465   | 5028  | 3385  | 4308 | 6166 | 4117  | 5872 | 3871  | 4939 | 3508  | 4386  | 5875 | 2786  | 3316  | 3066  | 3882  | 3794  | 2881  | 6152 | 3327  | 3267  | 3400  | 4338  | 3312  | Fras1    |       |
| Frat1    | 1219  | 1427  | 1375  | 1995  | 1598   | 1494  | 1779  | 699  | 722  | 1088  | 795  | 893   | 653  | 1021  | 1276  | 1097 | 1738  | 1675  | 1803  | 1403  | 1836  | 1009  | 723  | 1159  | 1183  | 1012  | 797   | 1009  | Frat1    |       |
| Frat2    | 1676  | 2057  | 1665  | 2042  | 1554   | 1595  | 1809  | 1094 | 962  | 1127  | 970  | 1377  | 949  | 1237  | 1625  | 1399 | 1958  | 2229  | 1937  | 1842  | 1818  | 971   | 917  | 1388  | 1282  | 1662  | 1296  | 1136  | Frat2    |       |
| Frem1    | 6579  | 3169  | 2321  | 1750  | 1940   | 2305  | 1621  | 5002 | 4711 | 3493  | 3879 | 2540  | 3527 | 2286  | 3405  | 5597 | 2111  | 1848  | 1446  | 2239  | 1780  | 2266  | 4220 | 2921  | 1859  | 2633  | 2846  | 2357  | Frem1    |       |
| Frem2    | 5351  | 4239  | 2449  | 2370  | 2399   | 2930  | 2093  | 2900 | 3884 | 2316  | 3537 | 1651  | 2293 | 1340  | 3969  | 5485 | 2087  | 2527  | 2122  | 2359  | 2440  | 1586  | 4330 | 1402  | 1205  | 1202  | 1628  | 1227  | Frem2    |       |
| Frem3    | 1     | 3     | 2     | 5     | 2      | 4     | 6     | 4    | 5    | 5     | 7    | 5     | 2    | 1     | 0     | 4    | 0     | 0     | 3     | 7     | 1     | 10    | 4    | 4     | 5     | 7     | 3     | 6     | Frem3    |       |
| Frg1     | 3719  | 3503  | 4009  | 3     |        |       |       |      |      |       |      |       |      |       |       |      |       |       |       |       |       |       |      |       |       |       |       |       |          |       |





|            |       |       |       |       |       |       |       |       |       |       |       |       |       |       |       |       |       |       |       |       |       |       |       |       |       |       |       |       |            |
|------------|-------|-------|-------|-------|-------|-------|-------|-------|-------|-------|-------|-------|-------|-------|-------|-------|-------|-------|-------|-------|-------|-------|-------|-------|-------|-------|-------|-------|------------|
| Gabarap    | 16057 | 16126 | 14421 | 20244 | 16553 | 15850 | 18391 | 17437 | 16579 | 17980 | 17312 | 15175 | 18003 | 16833 | 17971 | 14801 | 16219 | 16288 | 17276 | 17395 | 17220 | 15862 | 17054 | 16892 | 16682 | 17609 | 17187 | 17624 | Gabarap    |
| Gabrap1    | 8884  | 9421  | 9896  | 11031 | 10956 | 9277  | 10801 | 7399  | 6771  | 7930  | 6770  | 6278  | 6381  | 7045  | 9067  | 7893  | 9565  | 10146 | 10581 | 10501 | 10568 | 7347  | 6550  | 7437  | 7747  | 6455  | 6545  | 6700  | Gabrap1    |
| Gabrap2    | 5705  | 6684  | 6449  | 7190  | 7003  | 6391  | 8366  | 5559  | 4778  | 5388  | 4470  | 5377  | 4972  | 5786  | 6707  | 5690  | 6922  | 6949  | 7585  | 8264  | 7898  | 5250  | 4820  | 5329  | 5785  | 5325  | 5428  | 5905  | Gabrap2    |
| Gabbr1     | 14519 | 15849 | 13835 | 23577 | 28648 | 25110 | 25490 | 19678 | 19128 | 24136 | 21370 | 19782 | 19984 | 19547 | 16210 | 13622 | 19045 | 23873 | 26767 | 21507 | 28133 | 27178 | 17125 | 19881 | 25122 | 13357 | 17980 | 17467 | Gabbr1     |
| Gabbr2     | 105   | 174   | 91    | 242   | 872   | 409   | 436   | 846   | 991   | 1255  | 1046  | 519   | 635   | 460   | 220   | 190   | 175   | 458   | 442   | 413   | 521   | 1711  | 931   | 697   | 1080  | 267   | 375   | 390   | Gabbr2     |
| Gabpa      | 5264  | 3948  | 4997  | 4791  | 4540  | 4926  | 5614  | 7651  | 6524  | 6298  | 6733  | 7617  | 7312  | 8075  | 4999  | 4612  | 4832  | 4439  | 4931  | 5162  | 4967  | 6794  | 6941  | 7177  | 6946  | 7140  | 7299  | 7976  | Gabpa      |
| Gabpb1     | 2784  | 2420  | 3400  | 3061  | 3067  | 2963  | 3394  | 4545  | 4043  | 4188  | 4095  | 5528  | 4570  | 5334  | 2683  | 2415  | 3019  | 3086  | 3296  | 2597  | 3283  | 4814  | 3962  | 4759  | 4539  | 5802  | 5263  | 5408  | Gabpb1     |
| Gabpb2     | 4567  | 3563  | 2806  | 3060  | 3197  | 3703  | 3481  | 8172  | 8412  | 7226  | 8082  | 8751  | 8641  | 8987  | 3789  | 3500  | 3049  | 3032  | 3242  | 3902  | 3624  | 5802  | 7774  | 6983  | 7446  | 6262  | 9678  | 9156  | Gabpb2     |
| Gabra1     | 321   | 197   | 363   | 368   | 547   | 568   | 560   | 1061  | 723   | 910   | 619   | 610   | 543   | 657   | 334   | 237   | 351   | 438   | 564   | 566   | 688   | 1110  | 772   | 847   | 969   | 359   | 669   | 612   | Gabra1     |
| Gabra2     | 557   | 450   | 662   | 1094  | 1573  | 1393  | 1728  | 1890  | 1569  | 2027  | 1623  | 1764  | 1337  | 2169  | 676   | 467   | 797   | 1142  | 1681  | 1493  | 1773  | 2480  | 1805  | 2352  | 2854  | 1369  | 1651  | 1734  | Gabra2     |
| Gabra3     | 1351  | 1175  | 1026  | 1681  | 2711  | 2366  | 2578  | 2455  | 2280  | 2341  | 2064  | 1527  | 1283  | 1576  | 1610  | 1178  | 1494  | 2245  | 2184  | 2478  | 2734  | 3217  | 2394  | 1848  | 2402  | 1317  | 1259  | 1304  | Gabra3     |
| Gabra4     | 1226  | 675   | 608   | 925   | 1332  | 1062  | 1474  | 492   | 567   | 456   | 528   | 288   | 308   | 325   | 905   | 935   | 781   | 1013  | 1240  | 1253  | 1415  | 508   | 649   | 394   | 487   | 317   | 222   | 293   | Gabra4     |
| Gabra5     | 107   | 102   | 86    | 152   | 475   | 292   | 417   | 398   | 405   | 388   | 305   | 151   | 141   | 140   | 129   | 86    | 123   | 245   | 344   | 324   | 390   | 416   | 376   | 261   | 416   | 108   | 129   | 128   | Gabra5     |
| Gabra6     | 0     | 0     | 0     | 0     | 0     | 0     | 0     | 0     | 0     | 0     | 0     | 0     | 0     | 0     | 0     | 0     | 0     | 0     | 0     | 0     | 0     | 0     | 3     | 0     | 0     | 0     | 0     | 0     | Gabra6     |
| Gabrb1     | 558   | 470   | 279   | 630   | 1087  | 950   | 1233  | 879   | 832   | 594   | 581   | 290   | 248   | 300   | 707   | 449   | 428   | 741   | 821   | 1317  | 1420  | 755   | 911   | 428   | 595   | 113   | 263   | 225   | Gabrb1     |
| Gabrb2     | 2150  | 1939  | 1073  | 1993  | 2630  | 2922  | 2692  | 3187  | 2031  | 1974  | 1636  | 1924  | 1733  | 1903  | 2430  | 1604  | 1342  | 1909  | 2352  | 3338  | 3131  | 2308  | 2019  | 1603  | 2527  | 303   | 2126  | 1831  | Gabrb2     |
| Gabrb3     | 3357  | 3372  | 2612  | 4823  | 7250  | 6090  | 7359  | 5860  | 5225  | 5534  | 4819  | 4024  | 3709  | 4302  | 4191  | 3242  | 3701  | 5465  | 5855  | 5925  | 7038  | 7451  | 5041  | 4578  | 6260  | 2575  | 3542  | 3620  | Gabrb3     |
| Gabrd      | 2     | 3     | 0     | 19    | 40    | 27    | 18    | 1     | 4     | 2     | 4     | 3     | 7     | 0     | 1     | 9     | 2     | 32    | 17    | 16    | 31    | 10    | 6     | 7     | 15    | 2     | 6     | 0     | Gabrd      |
| Gabre      | 1216  | 1056  | 987   | 958   | 909   | 976   | 1063  | 446   | 455   | 396   | 470   | 403   | 399   | 365   | 1006  | 1091  | 1114  | 1050  | 1123  | 1052  | 1036  | 391   | 476   | 491   | 319   | 592   | 363   | 408   | Gabre      |
| Gabrg1     | 639   | 574   | 646   | 785   | 1089  | 822   | 1027  | 291   | 291   | 226   | 227   | 167   | 169   | 267   | 715   | 567   | 672   | 839   | 946   | 1126  | 1138  | 439   | 331   | 212   | 357   | 147   | 225   | 227   | Gabrg1     |
| Gabrg2     | 1248  | 1158  | 1318  | 1826  | 3036  | 2474  | 3067  | 7376  | 5164  | 4992  | 4498  | 4432  | 3733  | 4633  | 2145  | 1086  | 1501  | 2060  | 2605  | 3239  | 2905  | 7596  | 5489  | 4437  | 5894  | 2761  | 4467  | 4367  | Gabrg2     |
| Gabrg3     | 57    | 43    | 22    | 74    | 181   | 168   | 184   | 151   | 165   | 140   | 177   | 112   | 41    | 104   | 87    | 48    | 52    | 154   | 134   | 149   | 187   | 185   | 147   | 77    | 163   | 86    | 59    | 82    | Gabrg3     |
| Gabrp      | 661   | 662   | 562   | 1     | 1     | 613   | 1     | 1211  | 1481  | 593   | 1009  | 1377  | 1768  | 1510  | 1026  | 766   | 134   | 508   | 93    | 31    | 0     | 7     | 1558  | 1244  | 160   | 146   | 1237  | 1697  | Gabrp      |
| Gabrq      | 1433  | 1583  | 1110  | 1859  | 1589  | 1637  | 1971  | 586   | 460   | 433   | 382   | 495   | 348   | 478   | 1677  | 1192  | 1459  | 1618  | 1653  | 2024  | 1925  | 640   | 451   | 386   | 483   | 344   | 459   | 426   | Gabrq      |
| Gabrr1     | 3     | 3     | 0     | 3     | 6     | 11    | 4     | 13    | 10    | 10    | 5     | 7     | 8     | 15    | 4     | 6     | 0     | 2     | 6     | 17    | 5     | 7     | 13    | 14    | 5     | 12    | 8     | 8     | Gabrr1     |
| Gabrr2     | 28    | 61    | 45    | 60    | 52    | 51    | 69    | 16    | 34    | 28    | 25    | 28    | 11    | 18    | 40    | 41    | 37    | 80    | 66    | 33    | 58    | 27    | 19    | 17    | 33    | 24    | 9     | 12    | Gabrr2     |
| Gabrr3     | 10    | 11    | 34    | 3     | 16    | 28    | 17    | 31    | 12    | 49    | 21    | 30    | 17    | 42    | 16    | 5     | 23    | 1     | 12    | 17    | 11    | 43    | 16    | 23    | 24    | 23    | 45    | 50    | Gabrr3     |
| Gad1       | 945   | 961   | 841   | 1721  | 3458  | 2698  | 3081  | 5709  | 4653  | 5464  | 4395  | 5046  | 3810  | 5163  | 1167  | 561   | 1424  | 1949  | 3066  | 2515  | 3143  | 7526  | 3614  | 5125  | 7001  | 3153  | 4610  | 4135  | Gad1       |
| Gad2       | 1562  | 1221  | 1518  | 2460  | 3984  | 3411  | 4019  | 8204  | 7188  | 9077  | 6835  | 10204 | 5192  | 11106 | 1742  | 769   | 2466  | 2400  | 3949  | 2818  | 3871  | 11221 | 4792  | 9469  | 11229 | 7576  | 8503  | 8109  | Gad2       |
| Gadd45a    | 678   | 798   | 976   | 769   | 599   | 482   | 654   | 552   | 392   | 633   | 551   | 630   | 672   | 693   | 659   | 664   | 837   | 640   | 563   | 567   | 648   | 409   | 491   | 736   | 472   | 862   | 614   | 730   | Gadd45a    |
| Gadd45b    | 403   | 655   | 556   | 571   | 269   | 366   | 216   | 226   | 344   | 283   | 412   | 280   | 381   | 261   | 438   | 659   | 416   | 590   | 263   | 315   | 252   | 236   | 474   | 262   | 271   | 307   | 360   | 305   | Gadd45b    |
| Gadd45g    | 1340  | 2068  | 3268  | 2188  | 2044  | 1943  | 1559  | 1860  | 1671  | 2017  | 1793  | 3308  | 2537  | 2760  | 1530  | 1258  | 2883  | 1782  | 2503  | 1859  | 1649  | 1648  | 1581  | 2894  | 2512  | 2873  | 3309  | 3018  | Gadd45g    |
| Gadd45gip1 | 858   | 964   | 1185  | 860   | 890   | 965   | 1445  | 1465  | 1598  | 1666  | 1646  | 1707  | 1622  | 1852  | 769   | 878   | 1087  | 990   | 1180  | 895   | 930   | 1353  | 1638  | 1861  | 1585  | 1913  | 1587  | 1774  | Gadd45gip1 |
| Gadl1      | 8     | 4     | 2     | 19    | 11    | 3     | 1     | 33    | 45    | 30    | 53    | 22    | 14    | 22    | 9     | 8     | 1     | 7     | 2     | 5     | 10    | 13    | 46    | 51    | 42    | 16    | 2     | 7     | Gadl1      |
| Gak        | 5247  | 5414  | 5419  | 5683  | 5643  | 5615  | 5260  | 4974  | 5852  | 6497  | 5936  | 6929  | 6032  | 6387  | 4987  | 5021  | 5175  | 5409  | 5870  | 4759  | 5672  | 6012  | 5664  | 6135  | 6561  | 6456  | 6108  | 6324  | Gak        |
| Gal        | 80    | 102   | 26    | 14    | 263   | 39    | 46    | 167   | 208   | 152   | 250   | 15    | 100   | 29    | 84    | 100   | 60    | 141   | 42    | 27    | 32    | 246   | 137   | 29    | 144   | 20    | 15    | 24    | Gal        |
| Gal3st1    | 15    | 13    | 17    | 12    | 23    | 22    | 8     | 32    | 54    | 54    | 79    | 16    | 29    | 21    | 22    | 23    | 17    | 19    | 9     | 6     | 4     | 37    | 56    | 34    | 43    | 30    | 19    | 21    | Gal3st1    |
| Gal3st2    | 1     | 0     | 0     | 0     | 0     | 0     | 0     | 0     | 0     | 0     | 2     | 3     | 1     | 1     | 0     | 0     | 0     | 0     | 0     | 2     | 0     | 0     | 5     | 0     | 3     | 4     | 1     | 1     | Gal3st2    |
| Gal3st2b   | 0     | 0     | 1     | 0     | 0     | 0     | 0     | 0     | 0     | 0     | 3     | 1     | 0     | 0     | 0     | 0     | 0     | 0     | 0     | 0     | 0     | 5     | 2     | 0     | 0     | 0     | 0     | 0     | Gal3st2b   |
| Gal3st2c   | 6     | 5     | 7     | 7     | 16    | 8     | 10    | 10    | 2     | 8     | 11    | 10    | 10    | 6     | 1     | 3     | 2     | 3     | 6     | 2     | 5     | 2     | 10    | 8     | 2     | 4     | 10    | 12    | Gal3st2c   |
| Gal3st3    | 463   | 543   | 731   | 580   | 875   | 714   | 708   | 804   | 863   | 1086  | 853   | 959   | 755   | 818   | 476   | 496   | 772   | 666   | 860   | 623   | 705   | 1205  | 828   | 1063  | 1120  | 937   | 793   | 843   | Gal3st3    |
| Gal3st4    | 0     | 0     | 0     | 0     | 0     | 0     | 0     | 0     | 0     | 0     | 0     | 0     | 0     | 0     | 0     | 0     | 0     | 0     | 0     | 0     | 0     | 3     | 0     | 0     | 0     | 0     | 0     | 0     | Gal3st4    |
| Galc       | 1788  | 1672  | 1942  | 2032  | 2124  | 2106  | 2216  | 2445  | 2295  | 2547  | 2387  | 2555  | 2933  | 1945  | 1774  | 2005  | 2133  | 2136  | 1905  | 2070  | 2565  | 2380  | 2715  | 2656  | 2704  | 2554  | 2819  | Galc  |            |
| Gale       | 1448  | 1991  | 1690  | 1586  | 1314  | 1474  | 1260  | 694   | 943   | 833   | 941   | 812   | 785   | 680   | 1381  | 1755  | 1673  | 1465  | 1597  | 1407  | 1290  | 837   | 847   | 852   | 925   | 853   | 918   | 864   | Gale       |
| Galk1      | 2834  | 3026  | 2648  | 2352  | 1616  | 2116  | 1638  | 1828  | 2716  | 2114  | 2457  | 2268  | 2497  | 1975  | 2462  | 2946  | 2387  | 2080  | 2018  | 2033  | 1591  | 1576  | 2978  | 2338  | 1851  | 2969  | 2586  | 2268  | Galk1      |
| Galk2      | 1689  | 1640  | 1577  | 1321  | 1236  | 1320  | 1226  | 1887  | 1911  | 1498  | 1693  | 1695  | 1839  | 1547  | 1691  | 1834  | 1396  | 1201  | 1270  | 1539  | 1189  | 1425  | 2081  | 1538  | 1444  | 1641  | 1629  | 1734  | Galk2      |
| Galm       | 1606  | 1157  | 1122  | 1001  | 534   | 534   | 613   | 888   | 748   | 910   | 856   | 422   | 542   | 477   | 1199  | 1458  | 1010  | 654   | 581   | 666   | 525   | 297   | 994   | 1035  | 275   | 1379  | 446   | 443   | Galm       |
| Galns      | 753   | 915   | 777   | 732   | 669   | 608   | 449   | 357   | 486   | 508   | 577   | 430   | 479   | 627   | 671   | 896   | 684   | 706   | 589   | 482   | 542   | 386   | 623   | 342   | 376   | 508   | 500   | 437   | Galns      |
| Galnt1     | 7745  | 6258  | 6989  | 5558  | 5827  | 6214  | 6187  | 9651  | 8932  | 7914  | 8737  | 9717  | 9768  | 9375  | 7764  | 7555  | 6152  | 5738  | 5849  | 6605  | 5746  | 8408  | 9291  | 8446  | 8140  | 10157 | 10287 | 10380 | Galnt1     |
| Galnt10    | 5577  | 6687  | 6759  | 6415  | 5155  | 5525  | 4255  | 2451  | 3111  | 2913  | 3469  | 2871  | 3148  | 2586  | 5189  | 6830  | 6420  | 6472  | 5591  | 3795  | 5112  |       |       |       |       |       |       |       |            |

|         |       |       |       |       |       |       |       |       |       |       |       |       |       |       |       |       |       |       |       |       |       |       |       |       |       |       |       |       |         |
|---------|-------|-------|-------|-------|-------|-------|-------|-------|-------|-------|-------|-------|-------|-------|-------|-------|-------|-------|-------|-------|-------|-------|-------|-------|-------|-------|-------|-------|---------|
| Gapvd1  | 14962 | 14400 | 10874 | 13785 | 15026 | 15834 | 16134 | 15188 | 14075 | 14356 | 13714 | 14655 | 13514 | 14706 | 14668 | 13307 | 12560 | 14236 | 14724 | 15292 | 16601 | 14054 | 13282 | 12977 | 15346 | 10544 | 14164 | 13968 | Gapvd1  |
| Gar1    | 1593  | 1645  | 2983  | 2579  | 1736  | 1637  | 1971  | 1584  | 1688  | 2378  | 2384  | 2817  | 2508  | 3476  | 1431  | 1372  | 2664  | 1974  | 1975  | 1522  | 1844  | 1755  | 1629  | 3289  | 2466  | 3518  | 2826  | 3618  | Gar1    |
| Garem1  | 3233  | 3162  | 2070  | 2986  | 3355  | 3073  | 3023  | 1536  | 1722  | 1560  | 1629  | 1397  | 1712  | 1304  | 3157  | 3405  | 2491  | 3144  | 2818  | 2514  | 3051  | 1604  | 1609  | 1232  | 1528  | 754   | 1303  | 1333  | Garem1  |
| Garem2  | 2143  | 2978  | 2697  | 3144  | 3377  | 3148  | 3036  | 2842  | 2556  | 3089  | 2382  | 3994  | 3548  | 3649  | 2483  | 2039  | 3637  | 2731  | 3896  | 3179  | 3148  | 3160  | 2207  | 3344  | 3373  | 3326  | 3427  | 3701  | Garem2  |
| Garnl3  | 2939  | 3142  | 2476  | 3066  | 3675  | 3463  | 3296  | 1827  | 1852  | 1962  | 1883  | 1387  | 1698  | 1318  | 3063  | 3059  | 2671  | 3316  | 3247  | 3457  | 3481  | 2294  | 1909  | 1279  | 1673  | 1125  | 1410  | 1170  | Garnl3  |
| Garre1  | 5290  | 5498  | 4288  | 5474  | 5642  | 5554  | 5187  | 4853  | 4991  | 5014  | 5138  | 4989  | 4948  | 4895  | 5368  | 5374  | 5072  | 5585  | 5506  | 5168  | 5559  | 5095  | 5045  | 4515  | 4995  | 3485  | 4928  | 4735  | Garre1  |
| Gars    | 14260 | 13635 | 13236 | 12429 | 12961 | 12823 | 13588 | 12208 | 11024 | 11048 | 10230 | 13259 | 11640 | 13256 | 14260 | 12167 | 12732 | 12444 | 13807 | 13502 | 13419 | 12629 | 10468 | 12268 | 12399 | 13462 | 12706 | 14156 | Gars    |
| Gart    | 15068 | 17094 | 16309 | 14672 | 11257 | 12518 | 12616 | 6260  | 7071  | 6819  | 6858  | 8256  | 7641  | 7990  | 13318 | 14396 | 14891 | 13661 | 13457 | 12866 | 12856 | 5335  | 6512  | 7820  | 7158  | 9801  | 8738  | 8759  | Gart    |
| Gas1    | 5143  | 3978  | 5709  | 4009  | 3009  | 3903  | 3474  | 6293  | 6825  | 6856  | 7417  | 7879  | 8558  | 8226  | 4158  | 4150  | 4190  | 3542  | 3701  | 3276  | 3259  | 3155  | 6923  | 8055  | 5339  | 10588 | 7304  | 8980  | Gas1    |
| Gas2    | 1862  | 1425  | 1510  | 1229  | 1054  | 1162  | 1206  | 1910  | 2081  | 1065  | 3140  | 1908  | 2079  | 1884  | 1880  | 1787  | 1290  | 1209  | 1201  | 1191  | 1266  | 1755  | 2901  | 1561  | 1621  | 2426  | 1977  | 2016  | Gas2    |
| Gas2l1  | 3087  | 4391  | 4154  | 4078  | 3045  | 2922  | 2754  | 1021  | 1275  | 1431  | 1475  | 1459  | 1266  | 1188  | 2943  | 3620  | 4496  | 4013  | 3465  | 2614  | 2837  | 1348  | 1311  | 1468  | 1191  | 1583  | 1468  | 1178  | Gas2l1  |
| Gas2l2  | 5     | 4     | 2     | 0     | 15    | 17    | 1     | 7     | 28    | 21    | 19    | 26    | 31    | 7     | 3     | 13    | 5     | 0     | 5     | 12    | 6     | 23    | 47    | 9     | 11    | 8     | 0     | 2     | Gas2l2  |
| Gas2l3  | 3163  | 2681  | 2547  | 2907  | 2463  | 2842  | 3232  | 2182  | 2155  | 1796  | 1873  | 2509  | 2096  | 2684  | 2963  | 2628  | 2647  | 3090  | 2848  | 2809  | 3038  | 1679  | 1825  | 2269  | 2204  | 2244  | 2508  | 2409  | Gas2l3  |
| Gas6    | 1433  | 1921  | 1975  | 1560  | 1871  | 1607  | 1401  | 761   | 1232  | 1145  | 1508  | 1040  | 1153  | 972   | 1581  | 2034  | 1665  | 1794  | 1578  | 1460  | 1357  | 1312  | 1730  | 986   | 1117  | 1078  | 1009  | 903   | Gas6    |
| Gas7    | 872   | 849   | 795   | 1235  | 1664  | 1507  | 1530  | 1899  | 2568  | 2517  | 2555  | 1623  | 1008  | 1659  | 872   | 882   | 1036  | 1541  | 1504  | 1382  | 1858  | 2782  | 2804  | 2397  | 3061  | 1524  | 1254  | 1360  | Gas7    |
| Gas8    | 3881  | 4806  | 5273  | 5219  | 4495  | 4634  | 4619  | 2561  | 2829  | 3358  | 3269  | 3300  | 3241  | 3482  | 3874  | 4064  | 5174  | 5111  | 4811  | 4273  | 4740  | 2918  | 2650  | 3434  | 3361  | 3622  | 3441  | 3420  | Gas8    |
| Gask1a  | 99    | 148   | 173   | 217   | 173   | 255   | 197   | 172   | 285   | 270   | 450   | 115   | 145   | 116   | 167   | 181   | 168   | 287   | 209   | 198   | 172   | 284   | 299   | 185   | 275   | 116   | 134   | 97    | Gask1a  |
| Gask1b  | 216   | 171   | 174   | 107   | 206   | 226   | 107   | 530   | 769   | 605   | 1189  | 337   | 628   | 358   | 240   | 213   | 169   | 215   | 115   | 150   | 76    | 592   | 1225  | 556   | 410   | 389   | 423   | 376   | Gask1b  |
| Gast    | 6     | 12    | 3     | 6     | 7     | 9     | 4     | 12    | 7     | 4     | 5     | 17    | 14    | 7     | 4     | 5     | 9     | 20    | 12    | 13    | 11    | 2     | 7     | 7     | 23    | 11    | 31    | 14    | Gast    |
| Gata1   | 31    | 55    | 39    | 12    | 13    | 12    | 20    | 32    | 52    | 28    | 42    | 50    | 109   | 82    | 47    | 65    | 29    | 11    | 18    | 20    | 13    | 18    | 35    | 23    | 15    | 94    | 35    | 165   | Gata1   |
| Gata2   | 1021  | 812   | 1364  | 1003  | 754   | 674   | 402   | 1342  | 1082  | 1908  | 1124  | 1232  | 1668  | 1061  | 823   | 1001  | 1015  | 750   | 725   | 458   | 525   | 1133  | 1027  | 1698  | 991   | 1486  | 1455  | 1404  | Gata2   |
| Gata3   | 818   | 734   | 2076  | 1626  | 1763  | 1524  | 1153  | 1594  | 1101  | 2175  | 1670  | 2081  | 2613  | 2171  | 947   | 877   | 1727  | 1525  | 1809  | 1212  | 1591  | 2491  | 1230  | 2196  | 2199  | 404   | 2103  | 2298  | Gata3   |
| Gata4   | 5     | 16    | 7     | 4     | 0     | 2     | 0     | 0     | 7     | 0     | 2     | 0     | 0     | 0     | 0     | 7     | 9     | 2     | 13    | 4     | 0     | 2     | 0     | 1     | 2     | 0     | 0     | 0     | Gata4   |
| Gata5   | 7     | 10    | 6     | 2     | 2     | 5     | 6     | 0     | 2     | 2     | 2     | 3     | 11    | 0     | 1     | 5     | 3     | 11    | 0     | 1     | 7     | 2     | 5     | 0     | 1     | 2     | 1     | 4     | Gata5   |
| Gata6   | 72    | 97    | 78    | 66    | 71    | 72    | 45    | 37    | 78    | 42    | 139   | 50    | 93    | 47    | 103   | 100   | 64    | 47    | 30    | 47    | 38    | 70    | 213   | 43    | 38    | 33    | 34    | 44    | Gata6   |
| Gatad1  | 6010  | 5532  | 6346  | 5329  | 5169  | 5162  | 5654  | 5108  | 4491  | 4789  | 4468  | 5462  | 5290  | 6069  | 5676  | 5167  | 6057  | 4738  | 5610  | 5662  | 5798  | 4724  | 4385  | 5155  | 4737  | 6205  | 5951  | 6381  | Gatad1  |
| Gatad2a | 7524  | 8935  | 9438  | 9246  | 8472  | 8218  | 8210  | 4629  | 5581  | 5782  | 5705  | 6874  | 6180  | 6607  | 7371  | 8069  | 9853  | 8962  | 9380  | 6840  | 8566  | 5275  | 5410  | 6610  | 5931  | 8117  | 6415  | 6927  | Gatad2a |
| Gatad2b | 8646  | 7375  | 9912  | 11311 | 11010 | 10425 | 11356 | 9631  | 9474  | 11444 | 11223 | 11691 | 10947 | 12699 | 7907  | 7958  | 10214 | 11102 | 10938 | 8045  | 11738 | 11837 | 9198  | 12051 | 12572 | 10598 | 10570 | 12309 | Gatad2b |
| Gatb    | 502   | 650   | 458   | 419   | 514   | 489   | 485   | 1112  | 930   | 937   | 845   | 1025  | 908   | 918   | 645   | 611   | 462   | 418   | 558   | 531   | 550   | 912   | 984   | 955   | 890   | 852   | 1092  | 1049  | Gatb    |
| Gatc    | 2163  | 2168  | 2160  | 1908  | 1850  | 1806  | 2026  | 2212  | 2244  | 2089  | 1837  | 2548  | 2171  | 2215  | 2172  | 1865  | 2230  | 1883  | 1967  | 2089  | 1893  | 2246  | 2145  | 2222  | 2250  | 2909  | 2294  | 2441  | Gatc    |
| Gatd1   | 1443  | 1686  | 1796  | 1591  | 1456  | 1394  | 1347  | 1962  | 2217  | 2296  | 2313  | 2109  | 2301  | 2226  | 1383  | 1446  | 1655  | 1412  | 1511  | 1408  | 1316  | 2226  | 2309  | 2278  | 2573  | 2027  | 2192  | Gatd1 |         |
| Gatd3a  | 1865  | 2070  | 1871  | 1745  | 1488  | 1487  | 1517  | 1849  | 2043  | 1920  | 2031  | 1686  | 1825  | 2101  | 1717  | 1838  | 1892  | 1569  | 1645  | 1512  | 1653  | 1547  | 2188  | 2001  | 1846  | 2035  | 1941  | 2078  | Gatd3a  |
| Gatm    | 112   | 42    | 95    | 45    | 61    | 190   | 38    | 83    | 32    | 28    | 175   | 45    | 59    | 70    | 75    | 46    | 56    | 145   | 66    | 45    | 47    | 166   | 34    | 43    | 177   | 36    | 46    | Gatm  |         |
| Gba     | 2987  | 3626  | 2667  | 3143  | 2938  | 2990  | 2596  | 2075  | 2113  | 2045  | 1986  | 2056  | 2144  | 1872  | 3355  | 3237  | 2840  | 2927  | 2802  | 2979  | 2854  | 2214  | 2328  | 1778  | 2152  | 1850  | 2038  | 2015  | Gba     |
| Gba2    | 6933  | 9410  | 7154  | 9037  | 8439  | 8374  | 7822  | 5046  | 5677  | 5932  | 5042  | 5858  | 5152  | 5213  | 7196  | 7139  | 7917  | 9031  | 9406  | 8329  | 8400  | 6014  | 5290  | 5771  | 6550  | 5417  | 5532  | 5116  | Gba2    |
| Gbe1    | 780   | 656   | 711   | 515   | 524   | 594   | 658   | 1133  | 1109  | 879   | 837   | 1019  | 1133  | 1077  | 868   | 714   | 626   | 452   | 538   | 783   | 584   | 964   | 1040  | 917   | 937   | 1313  | 1131  | 1328  | Gbe1    |
| Gbf1    | 10245 | 10994 | 9795  | 10545 | 10656 | 10875 | 9855  | 9165  | 10387 | 10066 | 10201 | 10143 | 10105 | 9490  | 10775 | 10739 | 10595 | 10699 | 10800 | 9194  | 10334 | 10955 | 9985  | 9666  | 10708 | 7172  | 9492  | 9202  | Gbf1    |
| Gbg10   | 25    | 22    | 43    | 36    | 50    | 38    | 26    | 48    | 78    | 78    | 153   | 76    | 77    | 38    | 22    | 23    | 46    | 30    | 42    | 29    | 21    | 82    | 126   | 47    | 65    | 46    | 66    | 63    | Gbg10   |
| Gbp10   | 3     | 3     | 0     | 6     | 16    | 3     | 4     | 13    | 21    | 21    | 26    | 15    | 5     | 12    | 9     | 0     | 0     | 12    | 5     | 4     | 9     | 27    | 40    | 29    | 16    | 6     | 14    | 6     | Gbp10   |
| Gbp2    | 15    | 17    | 10    | 20    | 23    | 37    | 18    | 35    | 40    | 36    | 31    | 40    | 46    | 45    | 22    | 23    | 10    | 20    | 11    | 31    | 21    | 43    | 109   | 28    | 36    | 35    | 42    | 49    | Gbp2    |
| Gbp2b   | 0     | 0     | 0     | 0     | 0     | 0     | 0     | 0     | 0     | 1     | 0     | 0     | 0     | 0     | 0     | 0     | 0     | 0     | 0     | 0     | 0     | 0     | 0     | 0     | 0     | 1     | 0     | 0     | Gbp2b   |
| Gbp3    | 17    | 18    | 25    | 17    | 18    | 24    | 25    | 48    | 71    | 87    | 109   | 71    | 81    | 68    | 30    | 24    | 17    | 24    | 19    | 63    | 19    | 104   | 92    | 75    | 110   | 90    | 73    | 69    | Gbp3    |
| Gbp4    | 35    | 38    | 60    | 48    | 125   | 71    | 75    | 101   | 167   | 165   | 222   | 60    | 81    | 89    | 42    | 47    | 37    | 83    | 66    | 89    | 100   | 177   | 299   | 101   | 116   | 71    | 46    | 53    | Gbp4    |
| Gbp5    | 8     | 8     | 15    | 9     | 4     | 2     | 12    | 21    | 10    | 12    | 12    | 7     | 10    | 5     | 13    | 2     | 11    | 1     | 5     | 8     | 22    | 25    | 17    | 18    | 17    | 13    | 18    | Gbp5  |         |
| Gbp6    | 12    | 4     | 16    | 12    | 38    | 37    | 10    | 89    | 76    | 58    | 82    | 55    | 60    | 49    | 16    | 12    | 12    | 48    | 12    | 10    | 17    | 145   | 161   | 76    | 85    | 40    | 53    | 58    | Gbp6    |
| Gbp7    | 87    | 66    | 85    | 67    | 109   | 82    | 88    | 170   | 190   | 170   | 287   | 171   | 197   | 155   | 90    | 80    | 74    | 88    | 78    | 133   | 80    | 201   | 255   | 183   | 135   | 200   | 184   | 237   | Gbp7    |
| Gbp8    | 28    | 26    | 21    | 31    | 54    | 49    | 27    | 73    | 78    | 63    | 131   | 35    | 49    | 46    | 38    | 25    | 15    | 51    | 29    | 62    | 29    | 82    | 109   | 74    | 76    | 56    | 20    | 36    | Gbp8    |
| Gbp9    | 100   | 86    | 126   | 98    | 159   | 119   | 122   | 199   | 274   | 318   | 450   | 211   | 246   | 220   | 117   | 125   | 79    | 140   | 72    | 189   | 113   | 349   | 472   | 259   | 306   | 226   | 318   | 233   | Gbp9    |
| Gbx1    | 65    | 88    | 74    | 156   | 557   | 225   | 232   | 231   | 434   | 644   | 834   | 428   | 159   | 471   | 136   | 104   | 192   | 232   | 208   | 133   | 207   | 456   | 610   | 369   | 443   | 498   | 213   | 305   | Gbx1    |
| Gbx2    | 463   | 524   | 666   | 773   | 970   | 677   | 858   | 895   | 499   | 1204  | 831   | 1023  | 350   | 1045  | 531   | 331   | 736   | 754   | 891   | 527   | 782   |       |       |       |       |       |       |       |         |

|        |       |       |       |       |       |       |       |       |       |       |       |       |       |       |       |       |       |       |       |       |       |       |       |       |       |       |       |       |        |
|--------|-------|-------|-------|-------|-------|-------|-------|-------|-------|-------|-------|-------|-------|-------|-------|-------|-------|-------|-------|-------|-------|-------|-------|-------|-------|-------|-------|-------|--------|
| Gdap2  | 3391  | 3316  | 2704  | 2825  | 2707  | 2767  | 3226  | 2594  | 2144  | 1775  | 1754  | 2016  | 1853  | 2092  | 3564  | 3290  | 2735  | 2879  | 2763  | 3011  | 2872  | 2256  | 2117  | 1970  | 1971  | 1872  | 2073  | 2046  | Gdap2  |
| Gde1   | 5050  | 5376  | 4093  | 4627  | 4672  | 4508  | 4844  | 4024  | 3753  | 3409  | 3160  | 3214  | 3097  | 2944  | 5346  | 4469  | 4434  | 4577  | 4967  | 5172  | 4975  | 3868  | 3761  | 3236  | 3609  | 3258  | 3084  | 3091  | Gde1   |
| Gdf10  | 531   | 677   | 485   | 377   | 406   | 530   | 160   | 1036  | 2052  | 1578  | 2557  | 517   | 1094  | 485   | 688   | 742   | 413   | 628   | 293   | 295   | 211   | 1957  | 2197  | 1024  | 1024  | 753   | 568   | 430   | Gdf10  |
| Gdf11  | 7059  | 6974  | 9311  | 8928  | 7450  | 6999  | 7483  | 3889  | 3015  | 4391  | 4019  | 4170  | 4308  | 5044  | 6754  | 6687  | 8619  | 7876  | 7395  | 6203  | 8055  | 4124  | 3181  | 4750  | 4492  | 4583  | 4771  | 5510  | Gdf11  |
| Gdf15  | 3     | 2     | 2     | 6     | 0     | 2     | 0     | 2     | 3     | 4     | 3     | 1     | 2     | 0     | 0     | 2     | 1     | 1     | 1     | 0     | 0     | 0     | 6     | 3     | 6     | 3     | 2     | 0     | Gdf15  |
| Gdf2   | 2     | 2     | 0     | 0     | 4     | 0     | 1     | 0     | 2     | 3     | 6     | 0     | 2     | 1     | 3     | 2     | 6     | 3     | 0     | 2     | 2     | 3     | 1     | 0     | 4     | 0     | 0     | 0     | Gdf2   |
| Gdf3   | 1     | 3     | 2     | 0     | 2     | 3     | 0     | 4     | 1     | 3     | 5     | 2     | 0     | 4     | 4     | 7     | 3     | 0     | 2     | 0     | 1     | 0     | 3     | 1     | 0     | 1     | 7     | 4     | Gdf3   |
| Gdf5   | 61    | 45    | 57    | 44    | 74    | 47    | 41    | 143   | 192   | 139   | 240   | 177   | 150   | 98    | 57    | 37    | 37    | 57    | 81    | 59    | 50    | 132   | 252   | 113   | 102   | 170   | 126   | 106   | Gdf5   |
| Gdf6   | 181   | 124   | 188   | 84    | 44    | 54    | 35    | 151   | 134   | 139   | 246   | 54    | 81    | 53    | 116   | 188   | 126   | 84    | 62    | 30    | 44    | 65    | 226   | 95    | 44    | 150   | 27    | 56    | Gdf6   |
| Gdf7   | 57    | 67    | 48    | 20    | 38    | 9     | 9     | 116   | 97    | 96    | 50    | 89    | 108   | 52    | 55    | 69    | 79    | 24    | 12    | 20    | 9     | 62    | 116   | 83    | 33    | 10    | 81    | 69    | Gdf7   |
| Gdf9   | 50    | 53    | 48    | 46    | 56    | 34    | 40    | 96    | 72    | 120   | 81    | 87    | 83    | 94    | 37    | 43    | 54    | 46    | 66    | 40    | 34    | 129   | 101   | 79    | 99    | 58    | 92    | 113   | Gdf9   |
| Gd1    | 29098 | 32864 | 31039 | 38481 | 40207 | 38402 | 40171 | 33987 | 31739 | 38931 | 32249 | 38814 | 33504 | 37789 | 31909 | 27649 | 36116 | 40091 | 41673 | 36811 | 41669 | 43565 | 31701 | 39392 | 42618 | 34869 | 36458 | 35858 | Gd1    |
| Gd2    | 45231 | 36449 | 39714 | 37677 | 36348 | 38696 | 42914 | 36278 | 32019 | 30672 | 30029 | 34269 | 32534 | 35157 | 45271 | 37668 | 38829 | 37640 | 39123 | 36691 | 42268 | 33713 | 32351 | 31726 | 32783 | 37142 | 35335 | 37205 | Gd2    |
| Gdnf   | 103   | 71    | 128   | 67    | 66    | 86    | 26    | 70    | 82    | 96    | 104   | 66    | 121   | 54    | 86    | 152   | 81    | 66    | 51    | 36    | 33    | 84    | 96    | 91    | 46    | 128   | 30    | 58    | Gdnf   |
| Gdpd1  | 2731  | 2690  | 2788  | 3856  | 4772  | 4274  | 5023  | 7022  | 5611  | 6029  | 4899  | 5965  | 5530  | 6659  | 3748  | 2590  | 3356  | 3859  | 4623  | 4776  | 4859  | 7197  | 5487  | 6192  | 6923  | 5859  | 5865  | 6313  | Gdpd1  |
| Gdpd2  | 527   | 681   | 812   | 707   | 1220  | 892   | 951   | 1336  | 1218  | 1272  | 1018  | 939   | 1254  | 1036  | 749   | 615   | 805   | 793   | 888   | 941   | 995   | 1681  | 1361  | 1053  | 1317  | 856   | 1035  | 986   | Gdpd2  |
| Gdpd3  | 210   | 243   | 256   | 253   | 330   | 265   | 283   | 221   | 180   | 216   | 258   | 179   | 213   | 195   | 138   | 247   | 286   | 303   | 291   | 269   | 290   | 312   | 207   | 246   | 280   | 186   | 242   | 169   | Gdpd3  |
| Gdpd4  | 8     | 10    | 4     | 5     | 13    | 5     | 1     | 9     | 7     | 2     | 10    | 3     | 6     | 4     | 17    | 18    | 3     | 2     | 4     | 1     | 1     | 3     | 2     | 0     | 9     | 0     | 3     | 0     | Gdpd4  |
| Gdpd5  | 2765  | 3981  | 4384  | 4893  | 6005  | 4399  | 4290  | 2506  | 2898  | 3400  | 3209  | 3089  | 3019  | 2836  | 3162  | 3434  | 5014  | 5085  | 5446  | 3863  | 4808  | 3922  | 2673  | 3192  | 3679  | 2844  | 2893  | 2658  | Gdpd5  |
| Gdpgp1 | 1078  | 1271  | 1022  | 1072  | 893   | 964   | 1026  | 4122  | 416   | 447   | 379   | 522   | 494   | 467   | 1000  | 10240 | 980   | 1205  | 956   | 956   | 1062  | 511   | 458   | 430   | 420   | 422   | 466   | 560   | Gdpgp1 |
| Gem    | 390   | 369   | 397   | 359   | 307   | 354   | 334   | 153   | 219   | 144   | 241   | 173   | 150   | 186   | 375   | 353   | 374   | 384   | 369   | 368   | 320   | 130   | 209   | 212   | 182   | 242   | 185   | 166   | Gem    |
| Gemin2 | 1375  | 1349  | 1607  | 1466  | 1088  | 1155  | 1245  | 1105  | 1027  | 1065  | 1222  | 1312  | 1267  | 1312  | 1435  | 1361  | 1563  | 1372  | 1227  | 1220  | 1198  | 983   | 1060  | 1137  | 1079  | 1557  | 1328  | 1462  | Gemin2 |
| Gemin4 | 18    | 14    | 9     | 9     | 11    | 9     | 12    | 7     | 21    | 6     | 21    | 9     | 29    | 21    | 11    | 14    | 21    | 11    | 16    | 12    | 12    | 8     | 11    | 14    | 7     | 8     | 16    | 21    | Gemin4 |
| Gemin5 | 9237  | 10039 | 7571  | 8102  | 6746  | 7935  | 7277  | 4146  | 4486  | 4090  | 4409  | 4766  | 4842  | 4571  | 8632  | 9326  | 7628  | 7707  | 7303  | 7280  | 7983  | 3728  | 4401  | 4114  | 4105  | 4277  | 5012  | 4930  | Gemin5 |
| Gemin6 | 693   | 582   | 808   | 541   | 536   | 623   | 617   | 954   | 812   | 736   | 738   | 845   | 925   | 1030  | 708   | 632   | 709   | 559   | 708   | 733   | 607   | 581   | 741   | 949   | 797   | 1200  | 1061  | 1142  | Gemin6 |
| Gemin7 | 1457  | 1750  | 1602  | 1570  | 1381  | 1282  | 1409  | 1197  | 1257  | 1204  | 1195  | 1378  | 1436  | 1418  | 1334  | 1319  | 1576  | 1466  | 1548  | 1348  | 1480  | 1105  | 1311  | 1405  | 1217  | 1577  | 1421  | 1454  | Gemin7 |
| Gemin8 | 1051  | 1133  | 1234  | 1114  | 930   | 910   | 1093  | 782   | 873   | 888   | 858   | 939   | 879   | 943   | 1000  | 1070  | 1082  | 1026  | 969   | 966   | 1001  | 673   | 832   | 810   | 832   | 1146  | 916   | 1027  | Gemin8 |
| Gen1   | 3173  | 2477  | 3311  | 2343  | 1478  | 2058  | 2368  | 2566  | 2108  | 1889  | 1949  | 3039  | 2834  | 3146  | 2826  | 2752  | 2742  | 2037  | 2046  | 2306  | 2111  | 1648  | 1926  | 2453  | 2338  | 3206  | 3393  | 3256  | Gen1   |
| Get1   | 4610  | 5099  | 5035  | 4729  | 4921  | 4563  | 4748  | 4727  | 4331  | 4222  | 3900  | 4073  | 4012  | 4289  | 4890  | 4558  | 4952  | 4754  | 5030  | 5174  | 4745  | 5108  | 4266  | 4418  | 4918  | 4333  | 4499  | 4441  | Get1   |
| Get3   | 5795  | 7288  | 6359  | 6859  | 5801  | 6261  | 5772  | 4903  | 5398  | 5464  | 4951  | 5536  | 5190  | 5217  | 6260  | 6222  | 6824  | 6113  | 6967  | 7350  | 6115  | 4284  | 5385  | 5279  | 5266  | 6280  | 5750  | 5543  | Get3   |
| Get4   | 1899  | 2325  | 2106  | 1828  | 1757  | 1764  | 1769  | 2216  | 2477  | 2315  | 2358  | 2526  | 2505  | 2428  | 1836  | 2026  | 1997  | 1852  | 2009  | 1864  | 1649  | 1918  | 2471  | 2397  | 2259  | 3150  | 2532  | 2533  | Get4   |
| Gfap   | 7     | 10    | 14    | 4     | 7     | 3     | 8     | 7     | 13    | 8     | 21    | 8     | 24    | 11    | 9     | 5     | 13    | 7     | 9     | 6     | 7     | 7     | 15    | 4     | 8     | 10    | 20    | 9     | Gfap   |
| Gfer   | 1095  | 1161  | 1154  | 1119  | 1048  | 1071  | 1101  | 1504  | 1434  | 1472  | 1493  | 1566  | 1623  | 1771  | 1138  | 1088  | 1105  | 1052  | 1181  | 1101  | 1075  | 1317  | 1365  | 1665  | 1508  | 1940  | 1564  | 1829  | Gfer   |
| Gfi1   | 18    | 17    | 7     | 26    | 11    | 16    | 8     | 7     | 5     | 4     | 16    | 7     | 12    | 10    | 11    | 15    | 8     | 25    | 16    | 7     | 15    | 7     | 9     | 8     | 3     | 8     | 7     | 6     | Gfi1   |
| Gfi1b  | 17    | 29    | 51    | 9     | 11    | 4     | 3     | 15    | 17    | 27    | 15    | 17    | 61    | 28    | 13    | 30    | 22    | 4     | 8     | 14    | 10    | 8     | 12    | 12    | 21    | 49    | 44    | 68    | Gfi1b  |
| Gfm1   | 3853  | 3730  | 3726  | 3375  | 3014  | 3317  | 3298  | 3149  | 3038  | 2866  | 3002  | 3460  | 3148  | 3450  | 3691  | 3610  | 3564  | 3125  | 3098  | 3282  | 3268  | 2954  | 3123  | 3047  | 3031  | 3539  | 3355  | 3366  | Gfm1   |
| Gfm2   | 3299  | 3344  | 3031  | 3040  | 2813  | 3175  | 3452  | 3701  | 3629  | 3532  | 3629  | 4179  | 4021  | 4247  | 3518  | 3167  | 3284  | 2925  | 3038  | 3330  | 3187  | 3536  | 3555  | 3657  | 3953  | 3923  | 4183  | 4146  | Gfm2   |
| Gfod1  | 1263  | 1367  | 1130  | 1861  | 2373  | 1922  | 1871  | 1134  | 1228  | 1409  | 1364  | 901   | 976   | 994   | 1361  | 1227  | 1577  | 2021  | 2083  | 1623  | 2138  | 1609  | 1199  | 1213  | 1520  | 653   | 655   | 984   | Gfod1  |
| Gfod2  | 3415  | 4111  | 3956  | 4617  | 5054  | 4275  | 4492  | 3425  | 3414  | 3809  | 3509  | 3850  | 3368  | 3663  | 3475  | 3420  | 4413  | 4738  | 5181  | 4197  | 4641  | 4311  | 3207  | 3902  | 4504  | 3652  | 3449  | 3661  | Gfod2  |
| Gfpt1  | 12380 | 10256 | 10495 | 13133 | 13679 | 13653 | 12905 | 10395 | 10852 | 11552 | 12707 | 9883  | 9909  | 9921  | 12538 | 12134 | 11208 | 13772 | 12602 | 12376 | 13412 | 12176 | 11042 | 10290 | 12095 | 7530  | 9069  | 8715  | Gfpt1  |
| Gfpt2  | 1774  | 1646  | 1581  | 1339  | 1275  | 1478  | 1373  | 699   | 1105  | 922   | 1182  | 722   | 938   | 691   | 1731  | 2003  | 1216  | 1626  | 1275  | 1220  | 1320  | 911   | 905   | 862   | 799   | 904   | 667   | 793   | Gfpt2  |
| Gfra1  | 2587  | 2998  | 2411  | 2573  | 4188  | 3179  | 2472  | 4851  | 4533  | 4526  | 5192  | 3643  | 5663  | 3253  | 3523  | 3344  | 2803  | 2941  | 3074  | 3051  | 2856  | 5812  | 4840  | 3002  | 4192  | 2266  | 3839  | 3792  | Gfra1  |
| Gfra2  | 388   | 408   | 626   | 526   | 928   | 688   | 610   | 674   | 925   | 967   | 1193  | 553   | 598   | 672   | 377   | 467   | 569   | 626   | 792   | 603   | 664   | 1178  | 1017  | 753   | 924   | 574   | 575   | 521   | Gfra2  |
| Gfra3  | 84    | 81    | 24    | 10    | 126   | 16    | 9     | 197   | 283   | 106   | 265   | 22    | 175   | 10    | 115   | 171   | 63    | 97    | 7     | 10    | 286   | 203   | 34    | 154   | 34    | 20    | 15    | Gfra3 |        |
| Gfra4  | 120   | 99    | 69    | 116   | 149   | 119   | 116   | 286   | 372   | 306   | 359   | 168   | 159   | 147   | 104   | 106   | 85    | 125   | 121   | 146   | 139   | 341   | 353   | 276   | 294   | 195   | 131   | 126   | Gfra4  |
| Gfral  | 1     | 1     | 0     | 0     | 2     | 0     | 0     | 0     | 0     | 4     | 0     | 0     | 0     | 3     | 0     | 2     | 0     | 0     | 1     | 0     | 0     | 0     | 1     | 0     | 0     | 0     | 1     | 0     | Gfral  |
| Gfus   | 2723  | 3365  | 2897  | 3070  | 2575  | 2716  | 2626  | 2264  | 2652  | 2439  | 2195  | 2442  | 2470  | 2479  | 2616  | 3055  | 2782  | 2883  | 2922  | 2909  | 2608  | 2042  | 2491  | 2603  | 2616  | 2768  | 2615  | 2537  | Gfus   |
| Gfy    | 35    | 30    | 0     | 64    | 3     | 4     | 4     | 95    | 97    | 257   | 106   | 18    | 36    | 31    | 24    | 14    | 12    | 10    | 6     | 4     | 8     | 2     | 98    | 229   | 4     | 297   | 8     | 11    | Gfy    |
| Gga1   | 2134  | 2581  | 3086  | 3254  | 3300  | 2839  | 2666  | 3091  | 3863  | 4608  | 4157  | 4929  | 4039  | 4228  | 1970  | 2257  | 3327  | 3111  | 3583  | 2433  | 2876  | 4101  | 3708  | 4688  | 4619  | 5370  | 4040  | 4001  | Gga1   |
| Gga2   | 10622 | 9980  | 10246 | 9575  | 8703  | 8816  | 8362  | 6517  | 7018  | 7111  | 8080  | 6985  | 7158  | 6921  | 8770  | 10664 | 9360  | 10193 | 9030  | 7623  | 8622  | 7050  | 7317  | 7322  | 7338  |       |       |       |        |

|        |      |       |       |       |       |       |      |       |       |       |       |       |       |       |      |      |       |       |       |      |       |       |       |       |       |       |       |      |        |     |
|--------|------|-------|-------|-------|-------|-------|------|-------|-------|-------|-------|-------|-------|-------|------|------|-------|-------|-------|------|-------|-------|-------|-------|-------|-------|-------|------|--------|-----|
| Gimap5 | 51   | 42    | 53    | 41    | 29    | 45    | 32   | 29    | 42    | 56    | 87    | 51    | 43    | 44    | 40   | 35   | 36    | 40    | 37    | 38   | 36    | 28    | 56    | 42    | 34    | 37    | 36    | 28   | Gimap5 |     |
| Gimap6 | 430  | 286   | 380   | 226   | 319   | 300   | 275  | 487   | 552   | 501   | 720   | 440   | 511   | 414   | 421  | 357  | 305   | 314   | 330   | 408  | 290   | 460   | 731   | 463   | 369   | 447   | 435   | 377  | Gimap6 |     |
| Gimap7 | 0    | 0     | 0     | 0     | 0     | 0     | 0    | 0     | 0     | 0     | 0     | 0     | 0     | 0     | 0    | 0    | 0     | 0     | 0     | 0    | 0     | 0     | 1     | 0     | 0     | 2     | 0     | 0    | Gimap7 |     |
| Gimap8 | 83   | 48    | 100   | 74    | 66    | 89    | 59   | 204   | 168   | 189   | 213   | 166   | 214   | 191   | 74   | 85   | 65    | 59    | 87    | 64   | 79    | 197   | 230   | 151   | 157   | 184   | 237   | 155  | Gimap8 |     |
| Gimap9 | 176  | 122   | 171   | 72    | 88    | 116   | 97   | 184   | 225   | 114   | 240   | 98    | 202   | 137   | 175  | 169  | 82    | 101   | 92    | 107  | 93    | 125   | 256   | 163   | 114   | 219   | 162   | 183  | Gimap9 |     |
| Gimd1  | 0    | 0     | 0     | 0     | 0     | 0     | 0    | 0     | 0     | 0     | 0     | 0     | 0     | 0     | 0    | 0    | 0     | 0     | 0     | 0    | 0     | 0     | 0     | 0     | 0     | 2     | 0     | 0    | Gimd1  |     |
| Gin1   | 517  | 454   | 456   | 547   | 557   | 555   | 654  | 949   | 888   | 894   | 864   | 948   | 813   | 1043  | 662  | 484  | 528   | 516   | 567   | 603  | 600   | 739   | 821   | 1005  | 867   | 941   | 979   | 957  | Gin1   |     |
| Ginm1  | 671  | 561   | 629   | 588   | 481   | 616   | 591  | 597   | 512   | 472   | 597   | 584   | 524   | 549   | 633  | 640  | 537   | 587   | 504   | 641  | 581   | 463   | 534   | 484   | 554   | 512   | 623   | 572  | Ginm1  |     |
| Gins1  | 1396 | 1296  | 1603  | 1307  | 970   | 1109  | 1401 | 2003  | 1622  | 1648  | 1392  | 2359  | 2030  | 2511  | 1501 | 1181 | 1510  | 1176  | 1301  | 1437 | 1249  | 1427  | 1378  | 2239  | 1779  | 2981  | 2608  | 2817 | Gins1  |     |
| Gins2  | 2851 | 3304  | 3155  | 2570  | 1730  | 2071  | 1976 | 1307  | 1668  | 1330  | 1484  | 1992  | 1791  | 1821  | 2508 | 2801 | 2738  | 2216  | 2251  | 2434 | 2061  | 1016  | 1533  | 1605  | 1299  | 2507  | 2177  | 2059 | Gins2  |     |
| Gins3  | 2524 | 2529  | 2365  | 2000  | 1634  | 1679  | 2208 | 1247  | 1175  | 1129  | 1029  | 1516  | 1268  | 1523  | 2379 | 2350 | 2050  | 2053  | 1842  | 2096 | 1888  | 852   | 1031  | 1216  | 1084  | 1627  | 1521  | 1665 | Gins3  |     |
| Gins4  | 4167 | 3886  | 3478  | 3042  | 2195  | 2478  | 3064 | 2584  | 2267  | 1982  | 1920  | 2335  | 2326  | 2594  | 3687 | 3460 | 3209  | 2831  | 2650  | 2921 | 2753  | 1917  | 2190  | 2370  | 2037  | 2880  | 2568  | 2733 | Gins4  |     |
| Gip    | 0    | 0     | 0     | 0     | 0     | 0     | 0    | 0     | 0     | 3     | 2     | 1     | 2     | 0     | 0    | 0    | 0     | 1     | 2     | 0    | 0     | 0     | 0     | 0     | 0     | 2     | 5     | 0    | 1      | Gip |
| Gipc1  | 5285 | 6542  | 6441  | 5691  | 4889  | 4610  | 4510 | 3303  | 3753  | 3872  | 3436  | 4504  | 3768  | 4103  | 5103 | 5490 | 5979  | 5332  | 5281  | 4547 | 4612  | 3233  | 3700  | 4120  | 3630  | 5102  | 4230  | 4269 | Gipc1  |     |
| Gipc2  | 141  | 136   | 129   | 130   | 180   | 136   | 93   | 98    | 89    | 80    | 88    | 66    | 107   | 55    | 157  | 140  | 139   | 127   | 129   | 162  | 136   | 125   | 89    | 63    | 89    | 59    | 67    | 75   | Gipc2  |     |
| Gipc3  | 17   | 14    | 11    | 38    | 17    | 8     | 10   | 22    | 30    | 48    | 34    | 7     | 26    | 19    | 12   | 19   | 14    | 9     | 7     | 8    | 13    | 10    | 20    | 71    | 9     | 60    | 5     | 9    | Gipc3  |     |
| Gipr   | 489  | 602   | 782   | 864   | 928   | 989   | 869  | 260   | 349   | 472   | 351   | 406   | 369   | 376   | 603  | 645  | 889   | 952   | 989   | 779  | 928   | 476   | 259   | 509   | 650   | 230   | 323   | 345  | Gipr   |     |
| Git1   | 8037 | 10750 | 10571 | 12508 | 11281 | 10271 | 9337 | 4941  | 5965  | 6799  | 6386  | 7489  | 6204  | 6339  | 7545 | 9502 | 11946 | 11931 | 12507 | 8644 | 10366 | 7249  | 5611  | 7136  | 6929  | 7784  | 6049  | 6102 | Git1   |     |
| Git2   | 4742 | 5255  | 4487  | 5084  | 4979  | 5074  | 4679 | 3485  | 4022  | 3925  | 4157  | 3631  | 3444  | 3423  | 4421 | 5252 | 4476  | 5157  | 4998  | 4667 | 4944  | 3818  | 3886  | 3542  | 3705  | 3245  | 3549  | 3183 | Git2   |     |
| Gja1   | 6153 | 4010  | 6429  | 3798  | 4452  | 5867  | 3553 | 12217 | 13150 | 10734 | 13602 | 12600 | 15667 | 13277 | 5658 | 5580 | 4802  | 4807  | 3726  | 4706 | 3283  | 11199 | 17996 | 11451 | 14390 | 14609 | 13389 | Gja1 |        |     |
| Gja10  | 0    | 2     | 0     | 0     | 2     | 10    | 0    | 6     | 0     | 3     | 1     | 3     | 7     | 0     | 0    | 5    | 1     | 1     | 2     | 0    | 0     | 2     | 2     | 2     | 0     | 0     | 0     | 0    | Gja10  |     |
| Gja3   | 70   | 71    | 48    | 44    | 40    | 65    | 27   | 27    | 33    | 30    | 108   | 11    | 14    | 11    | 87   | 72   | 60    | 90    | 40    | 52   | 33    | 22    | 105   | 17    | 12    | 4     | 10    | 13   | Gja3   |     |
| Gja4   | 225  | 333   | 354   | 314   | 389   | 361   | 287  | 353   | 385   | 513   | 493   | 459   | 535   | 404   | 241  | 341  | 359   | 302   | 391   | 319  | 332   | 421   | 413   | 480   | 455   | 584   | 542   | 545  | Gja4   |     |
| Gja5   | 144  | 137   | 199   | 99    | 121   | 82    | 96   | 331   | 466   | 363   | 1033  | 379   | 355   | 364   | 152  | 219  | 173   | 76    | 97    | 109  | 103   | 441   | 797   | 480   | 257   | 754   | 401   | 523  | Gja5   |     |
| Gja6   | 2    | 3     | 4     | 3     | 2     | 4     | 4    | 7     | 10    | 10    | 1     | 17    | 7     | 9     | 11   | 9    | 3     | 4     | 10    | 6    | 3     | 10    | 14    | 13    | 1     | 15    | 3     | 5    | Gja6   |     |
| Gja8   | 3    | 0     | 3     | 0     | 0     | 0     | 0    | 7     | 9     | 4     | 5     | 0     | 0     | 0     | 0    | 0    | 0     | 0     | 0     | 0    | 0     | 0     | 7     | 7     | 0     | 16    | 0     | 0    | Gja8   |     |
| Gjb1   | 9    | 6     | 6     | 8     | 10    | 10    | 3    | 11    | 21    | 12    | 21    | 2     | 8     | 3     | 1    | 5    | 3     | 7     | 13    | 2    | 10    | 8     | 10    | 3     | 8     | 0     | 1     | 2    | Gjb1   |     |
| Gjb2   | 926  | 963   | 1011  | 192   | 510   | 1211  | 213  | 1324  | 2283  | 1175  | 1755  | 1375  | 1996  | 1322  | 1195 | 998  | 384   | 1284  | 358   | 305  | 253   | 797   | 2542  | 1618  | 752   | 478   | 1174  | 1313 | Gjb2   |     |
| Gjb3   | 29   | 36    | 34    | 36    | 25    | 48    | 18   | 23    | 41    | 24    | 22    | 13    | 26    | 20    | 32   | 55   | 36    | 23    | 39    | 22   | 21    | 3     | 45    | 26    | 8     | 9     | 24    | 12   | Gjb3   |     |
| Gjb4   | 7    | 5     | 1     | 1     | 2     | 0     | 3    | 1     | 7     | 7     | 2     | 7     | 9     | 1     | 4    | 5    | 3     | 0     | 3     | 4    | 4     | 3     | 2     | 5     | 1     | 2     | 2     | 4    | Gjb4   |     |
| Gjb5   | 25   | 33    | 29    | 8     | 12    | 12    | 0    | 5     | 8     | 10    | 9     | 2     | 10    | 3     | 41   | 45   | 27    | 21    | 8     | 20   | 13    | 7     | 16    | 4     | 2     | 1     | 3     | 2    | Gjb5   |     |
| Gjb6   | 149  | 130   | 142   | 103   | 232   | 196   | 104  | 833   | 1227  | 771   | 898   | 548   | 814   | 685   | 156  | 163  | 109   | 202   | 90    | 130  | 85    | 822   | 1608  | 800   | 628   | 409   | 547   | 491  | Gjb6   |     |
| Gjc1   | 4349 | 3836  | 5678  | 4962  | 5152  | 4552  | 4790 | 5029  | 4325  | 5213  | 5313  | 7078  | 6468  | 7094  | 4036 | 4113 | 5566  | 4680  | 5368  | 4035 | 4654  | 5294  | 4296  | 6236  | 5883  | 7783  | 6484  | 7213 | Gjc1   |     |
| Gjc2   | 52   | 87    | 54    | 116   | 118   | 89    | 80   | 37    | 37    | 37    | 38    | 20    | 18    | 20    | 58   | 70   | 67    | 123   | 112   | 91   | 82    | 40    | 29    | 33    | 34    | 25    | 23    | 11   | Gjc2   |     |
| Gjc3   | 13   | 5     | 2     | 4     | 23    | 6     | 1    | 42    | 80    | 51    | 119   | 18    | 56    | 13    | 11   | 8    | 1     | 2     | 2     | 2    | 2     | 84    | 79    | 23    | 47    | 18    | 12    | 13   | Gjc3   |     |
| Gjd2   | 363  | 327   | 377   | 555   | 849   | 674   | 778  | 1321  | 1129  | 1305  | 1078  | 1118  | 640   | 1160  | 382  | 213  | 636   | 621   | 858   | 882  | 745   | 1470  | 1091  | 1225  | 1561  | 978   | 1065  | 980  | Gjd2   |     |
| Gjd3   | 12   | 12    | 16    | 13    | 25    | 6     | 15   | 6     | 8     | 20    | 14    | 7     | 15    | 5     | 11   | 16   | 15    | 7     | 6     | 8    | 13    | 17    | 12    | 5     | 12    | 7     | 1     | 2    | Gjd3   |     |
| Gjd4   | 7    | 2     | 0     | 4     | 2     | 6     | 2    | 10    | 38    | 5     | 184   | 2     | 10    | 5     | 4    | 6    | 2     | 3     | 0     | 0    | 1     | 37    | 111   | 7     | 12    | 0     | 0     | 1    | Gjd4   |     |
| Gje1   | 0    | 0     | 0     | 0     | 0     | 1     | 1    | 0     | 3     | 0     | 2     | 0     | 0     | 1     | 0    | 0    | 0     | 0     | 0     | 3    | 0     | 0     | 0     | 0     | 0     | 0     | 0     | 0    | Gje1   |     |
| Gk     | 2722 | 2137  | 2250  | 2122  | 1997  | 2393  | 2435 | 1270  | 1129  | 978   | 1041  | 1012  | 1187  | 1183  | 2768 | 2504 | 2113  | 2123  | 1977  | 2514 | 2255  | 1079  | 1223  | 989   | 1041  | 1040  | 1276  | 1225 | Gk     |     |
| Gk5    | 1787 | 1332  | 1019  | 1108  | 1064  | 1343  | 1047 | 739   | 842   | 647   | 827   | 551   | 827   | 559   | 1589 | 1569 | 1086  | 1182  | 926   | 1089 | 968   | 665   | 804   | 535   | 486   | 436   | 579   | 477  | Gk5    |     |
| Gkap1  | 3155 | 2979  | 3716  | 3463  | 3107  | 3016  | 3471 | 2313  | 1880  | 2101  | 2302  | 2442  | 2209  | 2798  | 3312 | 2781 | 3536  | 3146  | 3467  | 3443 | 3390  | 2130  | 1995  | 2536  | 2270  | 2647  | 2621  | 2776 | Gkap1  |     |
| Gkn1   | 0    | 1     | 0     | 0     | 0     | 0     | 0    | 0     | 1     | 0     | 0     | 0     | 0     | 0     | 0    | 2    | 0     | 0     | 0     | 0    | 0     | 0     | 2     | 0     | 6     | 0     | 0     | 0    | Gkn1   |     |
| Gkn2   | 0    | 0     | 0     | 0     | 2     | 0     | 0    | 0     | 10    | 0     | 0     | 0     | 0     | 0     | 6    | 0    | 0     | 0     | 0     | 2    | 0     | 0     | 5     | 0     | 0     | 0     | 0     | 0    | Gkn2   |     |
| Gkn3   | 5    | 5     | 0     | 6     | 3     | 0     | 1    | 2     | 4     | 4     | 13    | 4     | 2     | 6     | 1    | 7    | 0     | 2     | 3     | 1    | 9     | 2     | 6     | 5     | 5     | 8     | 0     | 0    | Gkn3   |     |
| Gla    | 1889 | 1938  | 1819  | 1777  | 1492  | 1549  | 1607 | 855   | 704   | 684   | 691   | 779   | 838   | 833   | 1851 | 1916 | 1757  | 1669  | 1345  | 1517 | 1531  | 750   | 732   | 713   | 670   | 950   | 838   | 930  | Gla    |     |
| Glb1   | 1747 | 1919  | 1504  | 1540  | 1501  | 1512  | 1312 | 1321  | 1572  | 1327  | 1512  | 1347  | 1416  | 1237  | 1730 | 1933 | 1567  | 1502  | 1460  | 1524 | 1302  | 1506  | 1786  | 1274  | 1187  | 1460  | 1428  | 1250 | Glb1   |     |
| Glb11  | 1697 | 1614  | 1247  | 1372  | 1528  | 1758  | 1484 | 2201  | 2040  | 1905  | 2113  | 2068  | 2000  | 1953  | 1726 | 1634 | 1348  | 1567  | 1420  | 1507 | 1489  | 2364  | 2029  | 1889  | 2054  | 1692  | 2166  | 1926 | Glb11  |     |
| Glb12  | 687  | 504   | 575   | 487   | 422   | 522   | 457  | 413   | 377   | 389   | 337   | 444   | 423   | 350   | 571  | 538  | 447   | 394   | 415   | 418  | 340   | 291   | 350   | 333   | 291   | 426   | 403   | 370  | Glb12  |     |
| Glb1f3 | 0    | 5     | 0     | 0     | 2     | 3     | 0    | 0     | 1     | 0     | 0     | 0     | 1     | 0     | 0    | 4    | 1     | 1     | 0     | 1    | 0     | 3     | 3     | 2     | 1     | 0     | 1     | 0    | Glb1f3 |     |
| Glcc1  | 376  | 323   | 201   | 450   | 392   | 488   | 417  | 348   | 324   | 301   | 294   | 383   | 299   | 361   | 332  | 367  | 292   | 410   | 348   | 390  | 407   | 311   | 286   | 278   | 334   | 118   | 322   | 268  | Glcc1  |     |
| Glce   | 6763 | 5046  | 4918  | 4365  | 3949  | 4298  | 4289 | 3864  | 3676  | 3057  | 3682  | 2776  | 3398  | 3101  | 6372 | 6122 | 4157  | 4609  | 3797  | 4604 | 4026  | 3120  | 3832  | 2877  | 2630  | 2894  | 3037  | 3071 | Glce   |     |
| Gldc   | 3953 | 4944  | 5324  | 4757  | 4052  | 4045  | 4859 | 2027  | 2230  | 2295  | 1741  | 4216  | 3087  | 3936  | 4050 | 3666 | 5467  | 4535  | 5114  | 4301 | 4479  | 1888  | 1650  | 3321  | 2904  | 5194  | 3922  | 4193 | Gldc   |     |
| Gldn   | 18   | 11    | 2     |       |       |       |      |       |       |       |       |       |       |       |      |      |       |       |       |      |       |       |       |       |       |       |       |      |        |     |







|         |      |      |      |      |      |      |      |      |      |      |      |      |      |      |      |      |      |      |      |      |      |      |      |      |      |      |      |      |         |
|---------|------|------|------|------|------|------|------|------|------|------|------|------|------|------|------|------|------|------|------|------|------|------|------|------|------|------|------|------|---------|
| Gm14308 | 39   | 20   | 17   | 13   | 11   | 25   | 18   | 51   | 16   | 7    | 11   | 42   | 22   | 17   | 30   | 58   | 13   | 33   | 28   | 43   | 29   | 17   | 38   | 19   | 20   | 8    | 24   | 15   | Gm14308 |
| Gm14322 | 494  | 343  | 475  | 411  | 430  | 392  | 447  | 358  | 512  | 380  | 324  | 312  | 499  | 316  | 376  | 475  | 599  | 551  | 356  | 455  | 302  | 302  | 446  | 266  | 361  | 245  | 457  | 452  | Gm14322 |
| Gm14325 | 1909 | 1378 | 1788 | 1593 | 1419 | 1693 | 1485 | 1633 | 1584 | 1390 | 1396 | 1480 | 1516 | 1453 | 1949 | 1930 | 1471 | 1477 | 1466 | 1896 | 1541 | 1221 | 1627 | 1279 | 1305 | 1462 | 1547 | 1584 | Gm14325 |
| Gm14326 | 1017 | 763  | 908  | 604  | 721  | 1077 | 723  | 1123 | 838  | 648  | 984  | 716  | 755  | 644  | 1030 | 994  | 932  | 579  | 704  | 1098 | 966  | 744  | 862  | 733  | 587  | 767  | 932  | 663  | Gm14326 |
| Gm14327 | 32   | 13   | 11   | 20   | 27   | 12   | 21   | 27   | 40   | 22   | 32   | 28   | 49   | 21   | 34   | 34   | 14   | 13   | 26   | 23   | 13   | 32   | 31   | 12   | 24   | 8    | 15   | 17   | Gm14327 |
| Gm14391 | 335  | 50   | 46   | 100  | 43   | 193  | 44   | 99   | 97   | 146  | 43   | 115  | 79   | 117  | 90   | 85   | 36   | 50   | 44   | 54   | 45   | 60   | 70   | 96   | 46   | 32   | 66   | 34   | Gm14391 |
| Gm14393 | 15   | 16   | 27   | 32   | 20   | 24   | 21   | 16   | 18   | 8    | 13   | 13   | 17   | 12   | 24   | 23   | 35   | 28   | 22   | 14   | 32   | 25   | 12   | 14   | 25   | 14   | 20   | 15   | Gm14393 |
| Gm14399 | 768  | 545  | 478  | 410  | 627  | 725  | 548  | 636  | 677  | 485  | 634  | 519  | 511  | 514  | 774  | 713  | 579  | 626  | 549  | 729  | 573  | 632  | 678  | 463  | 480  | 321  | 610  | 417  | Gm14399 |
| Gm14401 | 2    | 0    | 0    | 3    | 0    | 0    | 1    | 2    | 4    | 1    | 2    | 0    | 2    | 1    | 3    | 3    | 0    | 1    | 4    | 6    | 0    | 0    | 4    | 1    | 2    | 0    | 2    | 2    | Gm14401 |
| Gm14403 | 438  | 383  | 330  | 262  | 329  | 361  | 324  | 231  | 285  | 253  | 234  | 209  | 290  | 208  | 401  | 487  | 289  | 383  | 286  | 301  | 239  | 246  | 296  | 185  | 151  | 205  | 175  | 139  | Gm14403 |
| Gm14406 | 0    | 2    | 1    | 12   | 5    | 3    | 3    | 0    | 1    | 3    | 3    | 3    | 1    | 3    | 1    | 1    | 0    | 7    | 7    | 5    | 2    | 5    | 1    | 0    | 3    | 4    | 1    | 1    | Gm14406 |
| Gm14408 | 1    | 0    | 0    | 2    | 0    | 0    | 0    | 1    | 0    | 0    | 0    | 0    | 0    | 4    | 0    | 0    | 0    | 0    | 0    | 0    | 2    | 0    | 1    | 0    | 0    | 0    | 0    | 0    | Gm14408 |
| Gm14409 | 3    | 2    | 3    | 13   | 3    | 6    | 2    | 0    | 2    | 1    | 2    | 1    | 1    | 1    | 4    | 5    | 1    | 4    | 2    | 7    | 0    | 5    | 4    | 0    | 1    | 1    | 2    | 1    | Gm14409 |
| Gm14410 | 1498 | 1040 | 1333 | 1056 | 1103 | 1360 | 1253 | 1272 | 1213 | 1144 | 1267 | 1173 | 1319 | 1189 | 1435 | 1151 | 1305 | 953  | 1281 | 1464 | 1126 | 1081 | 1172 | 900  | 1044 | 1099 | 1330 | 1101 | Gm14410 |
| Gm14412 | 122  | 81   | 37   | 47   | 84   | 102  | 74   | 40   | 68   | 56   | 52   | 33   | 58   | 39   | 113  | 133  | 59   | 85   | 59   | 90   | 75   | 48   | 50   | 32   | 33   | 22   | 21   | 21   | Gm14412 |
| Gm14418 | 340  | 223  | 188  | 190  | 295  | 318  | 335  | 233  | 236  | 258  | 333  | 357  | 352  | 243  | 563  | 459  | 284  | 263  | 274  | 299  | 403  | 284  | 296  | 411  | 193  | 414  | 218  | 189  | Gm14418 |
| Gm14419 | 16   | 11   | 6    | 8    | 102  | 102  | 9    | 93   | 25   | 12   | 6    | 9    | 29   | 6    | 18   | 119  | 12   | 8    | 6    | 10   | 11   | 40   | 11   | 4    | 21   | 11   | 23   | 75   | Gm14419 |
| Gm14434 | 6    | 147  | 235  | 4    | 37   | 9    | 45   | 20   | 79   | 4    | 421  | 619  | 36   | 21   | 17   | 53   | 7    | 39   | 53   | 128  | 24   | 541  | 27   | 52   | 129  | 226  | 1232 | 28   | Gm14434 |
| Gm14440 | 18   | 18   | 10   | 21   | 11   | 36   | 19   | 27   | 30   | 32   | 25   | 24   | 26   | 14   | 11   | 24   | 10   | 6    | 38   | 23   | 14   | 7    | 21   | 17   | 19   | 7    | 31   | 9    | Gm14440 |
| Gm14443 | 340  | 287  | 322  | 276  | 373  | 406  | 459  | 264  | 233  | 205  | 291  | 218  | 253  | 239  | 355  | 368  | 268  | 284  | 327  | 380  | 391  | 274  | 244  | 209  | 207  | 197  | 192  | 243  | Gm14443 |
| Gm14444 | 0    | 2    | 1    | 0    | 2    | 2    | 0    | 2    | 2    | 1    | 3    | 1    | 0    | 0    | 0    | 5    | 1    | 3    | 4    | 1    | 1    | 2    | 1    | 2    | 6    | 0    | 0    | 1    | Gm14444 |
| Gm14569 | 6    | 12   | 0    | 3    | 13   | 6    | 4    | 2    | 7    | 6    | 1    | 4    | 0    | 2    | 3    | 4    | 2    | 3    | 2    | 4    | 4    | 5    | 3    | 0    | 10   | 0    | 1    | 0    | Gm14569 |
| Gm14692 | 0    | 0    | 0    | 0    | 0    | 0    | 0    | 0    | 0    | 0    | 0    | 0    | 0    | 0    | 0    | 0    | 0    | 0    | 0    | 0    | 0    | 3    | 0    | 0    | 0    | 0    | 0    | 0    | Gm14692 |
| Gm14698 | 428  | 242  | 246  | 277  | 318  | 275  | 334  | 297  | 252  | 180  | 264  | 207  | 243  | 217  | 456  | 323  | 238  | 229  | 245  | 352  | 291  | 274  | 250  | 250  | 217  | 205  | 201  | 224  | Gm14698 |
| Gm14862 | 5    | 1    | 1    | 2    | 0    | 1    | 3    | 2    | 4    | 3    | 1    | 9    | 31   | 13   | 4    | 3    | 0    | 0    | 1    | 6    | 2    | 0    | 3    | 0    | 4    | 16   | 3    | 34   | Gm14862 |
| Gm15023 | 0    | 3    | 0    | 0    | 0    | 0    | 0    | 0    | 0    | 0    | 1    | 0    | 0    | 0    | 0    | 0    | 0    | 0    | 0    | 0    | 0    | 0    | 0    | 0    | 0    | 0    | 0    | 0    | Gm15023 |
| Gm15097 | 0    | 0    | 0    | 0    | 0    | 0    | 0    | 0    | 0    | 0    | 0    | 0    | 0    | 0    | 0    | 0    | 0    | 0    | 0    | 0    | 0    | 0    | 0    | 2    | 0    | 0    | 0    | 0    | Gm15097 |
| Gm15128 | 0    | 0    | 0    | 0    | 0    | 0    | 0    | 0    | 0    | 0    | 1    | 0    | 0    | 0    | 0    | 0    | 0    | 0    | 0    | 0    | 0    | 0    | 0    | 0    | 0    | 0    | 0    | 0    | Gm15128 |
| Gm15155 | 3    | 2    | 1    | 0    | 4    | 0    | 8    | 1    | 7    | 2    | 0    | 1    | 2    | 0    | 1    | 5    | 1    | 0    | 1    | 5    | 3    | 2    | 5    | 3    | 6    | 0    | 2    | 2    | Gm15155 |
| Gm15217 | 0    | 0    | 0    | 0    | 0    | 0    | 0    | 1    | 0    | 4    | 0    | 0    | 0    | 0    | 0    | 1    | 0    | 0    | 0    | 0    | 0    | 0    | 0    | 0    | 0    | 0    | 0    | 0    | Gm15217 |
| Gm15262 | 0    | 0    | 0    | 0    | 0    | 0    | 0    | 0    | 0    | 0    | 0    | 0    | 0    | 0    | 0    | 0    | 0    | 0    | 0    | 0    | 0    | 0    | 2    | 0    | 0    | 0    | 0    | 0    | Gm15262 |
| Gm15319 | 35   | 60   | 8    | 17   | 32   | 57   | 37   | 23   | 18   | 11   | 18   | 8    | 18   | 14   | 74   | 44   | 12   | 42   | 39   | 68   | 52   | 28   | 8    | 6    | 12   | 2    | 16   | 15   | Gm15319 |
| Gm15433 | 15   | 15   | 10   | 5    | 16   | 17   | 12   | 1    | 5    | 0    | 0    | 11   | 1    | 6    | 8    | 4    | 9    | 19   | 5    | 12   | 11   | 0    | 2    | 4    | 7    | 4    | 1    | 2    | Gm15433 |
| Gm15446 | 2472 | 2068 | 2016 | 2363 | 2797 | 2991 | 3051 | 2328 | 2053 | 1865 | 1993 | 2070 | 1952 | 1910 | 2773 | 2327 | 2033 | 2281 | 2662 | 2878 | 3040 | 2187 | 2003 | 1627 | 2053 | 1577 | 1986 | 1842 | Gm15446 |
| Gm15557 | 0    | 0    | 0    | 0    | 0    | 0    | 0    | 0    | 0    | 0    | 0    | 1    | 0    | 0    | 0    | 0    | 0    | 0    | 0    | 0    | 0    | 0    | 2    | 0    | 0    | 0    | 0    | 0    | Gm15557 |
| Gm15737 | 0    | 0    | 0    | 0    | 0    | 1    | 1    | 0    | 1    | 0    | 5    | 3    | 0    | 0    | 1    | 0    | 0    | 0    | 0    | 0    | 0    | 0    | 3    | 0    | 0    | 0    | 0    | 0    | Gm15737 |
| Gm1604b | 0    | 0    | 0    | 0    | 2    | 0    | 0    | 0    | 0    | 1    | 0    | 1    | 0    | 1    | 0    | 0    | 0    | 2    | 0    | 0    | 1    | 0    | 0    | 0    | 0    | 0    | 0    | 0    | Gm1604b |
| Gm16181 | 1    | 0    | 0    | 3    | 0    | 2    | 0    | 0    | 0    | 0    | 0    | 0    | 0    | 0    | 0    | 0    | 0    | 0    | 0    | 0    | 1    | 0    | 0    | 0    | 0    | 5    | 0    | 2    | Gm16181 |
| Gm16223 | 1    | 3    | 5    | 1    | 3    | 3    | 1    | 1    | 2    | 5    | 7    | 5    | 5    | 3    | 1    | 0    | 3    | 0    | 5    | 1    | 1    | 10   | 7    | 2    | 7    | 0    | 5    | 1    | Gm16223 |
| Gm16253 | 6    | 0    | 10   | 0    | 8    | 4    | 1    | 4    | 6    | 2    | 11   | 1    | 9    | 4    | 4    | 2    | 0    | 4    | 2    | 3    | 0    | 10   | 3    | 7    | 3    | 7    | 3    | 0    | Gm16253 |
| Gm16434 | 0    | 0    | 6    | 0    | 0    | 0    | 0    | 0    | 0    | 0    | 0    | 0    | 0    | 0    | 1    | 0    | 1    | 0    | 0    | 0    | 0    | 0    | 0    | 0    | 0    | 0    | 0    | 0    | Gm16434 |
| Gm16440 | 2    | 3    | 11   | 4    | 14   | 1    | 1    | 6    | 10   | 10   | 4    | 1    | 15   | 6    | 0    | 3    | 16   | 3    | 6    | 4    | 5    | 7    | 3    | 5    | 4    | 4    | 7    | 2    | Gm16440 |
| Gm1673  | 1129 | 1493 | 1120 | 1501 | 1572 | 1224 | 1580 | 1508 | 1215 | 1576 | 1329 | 1369 | 1344 | 1580 | 1159 | 812  | 1588 | 1245 | 1511 | 1557 | 1539 | 1389 | 1210 | 1648 | 1740 | 1507 | 1511 | 1480 | Gm1673  |
| Gm16867 | 145  | 134  | 163  | 74   | 97   | 76   | 49   | 39   | 89   | 50   | 54   | 85   | 198  | 80   | 69   | 157  | 86   | 79   | 109  | 130  | 48   | 62   | 98   | 71   | 61   | 106  | 142  | 154  | Gm16867 |
| Gm17067 | 0    | 0    | 0    | 0    | 0    | 0    | 0    | 0    | 0    | 0    | 0    | 0    | 0    | 0    | 0    | 0    | 0    | 0    | 0    | 0    | 0    | 1    | 0    | 0    | 0    | 0    | 0    | 0    | Gm17067 |
| Gm17266 | 2    | 0    | 3    | 0    | 0    | 0    | 2    | 5    | 1    | 0    | 0    | 0    | 1    | 2    | 0    | 1    | 0    | 0    | 1    | 0    | 2    | 5    | 0    | 0    | 0    | 0    | 1    | 0    | Gm17266 |
| Gm17349 | 8    | 6    | 10   | 1    | 10   | 8    | 10   | 10   | 12   | 16   | 25   | 8    | 18   | 17   | 7    | 8    | 5    | 4    | 12   | 0    | 2    | 10   | 10   | 22   | 11   | 11   | 16   | 9    | Gm17349 |
| Gm17359 | 5    | 3    | 15   | 5    | 7    | 6    | 0    | 5    | 7    | 11   | 9    | 7    | 24   | 12   | 5    | 9    | 5    | 3    | 2    | 2    | 2    | 7    | 10   | 1    | 9    | 6    | 15   | 9    | Gm17359 |
| Gm17364 | 0    | 3    | 6    | 8    | 5    | 7    | 0    | 4    | 3    | 3    | 3    | 1    | 3    | 0    | 0    | 2    | 10   | 1    | 16   | 2    | 4    | 0    | 4    | 1    | 6    | 1    | 5    | 0    | Gm17364 |
| Gm17387 | 0    | 0    | 0    | 0    | 0    | 0    | 0    | 0    | 0    | 0    | 1    | 0    | 1    | 0    | 0    | 0    | 0    | 0    | 0    | 0    | 0    | 0    | 0    | 0    | 0    | 0    | 0    | 2    | Gm17387 |
| Gm17428 | 0    | 0    | 0    | 0    | 0    | 0    | 0    | 1    | 0    | 0    | 1    | 0    | 0    | 1    | 0    | 0    | 0    | 0    | 0    | 0    | 0    | 0    | 0    | 0    | 0    | 0    | 0    | 0    | Gm17428 |
| Gm17455 | 9    | 14   | 37   | 15   | 11   | 12   | 7    | 33   | 33   | 23   | 32   | 20   | 39   | 34   | 16   | 19   | 19   | 11   | 15   | 24   | 9    | 35   | 46   | 25   | 23   | 19   | 21   | 23   | Gm17455 |
| Gm17482 | 0    | 2    | 0    | 0    | 0    | 0    | 0    | 0    | 0    | 0    | 1    | 0    | 0    | 0    | 0    | 1    | 0    | 2    | 2    | 0    | 2    | 3    | 0    | 0    | 0    | 0    | 0    | 0    | Gm17482 |
| Gm17535 | 0    | 0    | 0    | 0    | 0    | 0    | 0    | 0    | 0    | 0    | 0    | 0    | 0    | 0    | 0    | 0    | 0    | 0    | 0    | 0    | 0    | 0    | 0    | 0    | 1    | 0    | 0    | 0    | Gm17535 |
| Gm17542 | 0    | 0    | 0    | 0    | 2    | 0    | 0    | 0    | 0    | 0    | 0    | 0    | 0    | 0    | 0    | 0    | 0    | 0    | 0    | 0    | 0    | 0    | 0    | 0    | 0    | 0    | 0    | 0    | Gm17542 |
| Gm17555 | 0    | 0    | 0    | 0    | 0    | 0    | 0    | 0    | 0    | 0    | 0    | 0    | 0    | 0    | 1    | 0    | 0    | 0    | 0    | 0    | 0    | 0    | 0    | 0    | 2    | 0    | 0    | 0    | Gm17555 |
| Gm17606 | 8    | 10   | 7    | 3    | 12   | 3    | 7    | 10   | 4    | 12   | 6    | 11   | 6    | 29   | 3    | 1    | 8    | 3    | 5    | 5    | 19   | 7    | 2    | 33   | 6    | 11   | 16   | 12   | Gm17606 |
| Gm17617 | 0    | 0    | 1    | 0    | 0    | 0    | 0    | 0    | 0    | 0    | 2    | 0    | 1    | 0    | 0    | 1    | 2    | 0    | 0    |      |      |      |      |      |      |      |      |      |         |

|         |     |     |      |      |      |      |      |     |     |     |     |     |     |     |     |     |      |      |      |     |      |     |     |     |     |     |     |     |   |
|---------|-----|-----|------|------|------|------|------|-----|-----|-----|-----|-----|-----|-----|-----|-----|------|------|------|-----|------|-----|-----|-----|-----|-----|-----|-----|---|
| Gm20449 | 10  | 6   | 5    | 12   | 15   | 9    | 10   | 10  | 7   | 10  | 19  | 5   | 12  | 11  | 7   | 9   | 6    | 7    | 8    | 8   | 8    | 7   | 19  | 9   | 12  | 7   | 7   | 0   |   |
| Gm20481 | 0   | 2   | 7    | 1    | 2    | 0    | 1    | 0   | 0   | 0   | 0   | 1   | 0   | 2   | 1   | 2   | 0    | 0    | 2    | 5   | 0    | 3   | 1   | 1   | 0   | 0   | 0   | 0   |   |
| Gm20489 | 0   | 1   | 0    | 0    | 0    | 0    | 0    | 0   | 0   | 4   | 4   | 0   | 0   | 0   | 0   | 0   | 0    | 0    | 0    | 0   | 0    | 3   | 0   | 0   | 0   | 0   | 0   | 1   |   |
| Gm20498 | 23  | 21  | 12   | 26   | 24   | 11   | 34   | 22  | 19  | 22  | 14  | 27  | 27  | 15  | 36  | 23  | 31   | 11   | 26   | 32  | 36   | 17  | 22  | 14  | 23  | 20  | 22  | 13  |   |
| Gm20517 | 16  | 30  | 43   | 29   | 43   | 17   | 22   | 24  | 24  | 32  | 42  | 27  | 40  | 30  | 32  | 32  | 22   | 18   | 28   | 30  | 25   | 25  | 17  | 18  | 23  | 37  | 31  | 24  |   |
| Gm20518 | 32  | 41  | 31   | 48   | 25   | 28   | 46   | 22  | 13  | 29  | 21  | 24  | 14  | 35  | 29  | 19  | 49   | 66   | 47   | 43  | 68   | 30  | 12  | 26  | 23  | 24  | 15  | 21  |   |
| Gm20537 | 0   | 2   | 0    | 2    | 1    | 0    | 1    | 1   | 0   | 0   | 0   | 0   | 0   | 0   | 4   | 0   | 0    | 0    | 0    | 0   | 0    | 0   | 0   | 2   | 0   | 0   | 0   | 0   |   |
| Gm20594 | 0   | 0   | 0    | 0    | 0    | 0    | 0    | 0   | 0   | 0   | 0   | 0   | 0   | 0   | 1   | 0   | 0    | 0    | 0    | 0   | 0    | 0   | 0   | 0   | 0   | 0   | 0   | 0   |   |
| Gm20604 | 597 | 445 | 556  | 669  | 586  | 443  | 763  | 443 | 330 | 434 | 422 | 458 | 382 | 609 | 638 | 459 | 619  | 574  | 460  | 507 | 704  | 515 | 379 | 506 | 451 | 455 | 473 | 628 |   |
| Gm20605 | 13  | 19  | 6    | 26   | 9    | 16   | 15   | 7   | 8   | 5   | 4   | 9   | 2   | 13  | 7   | 6   | 23   | 21   | 8    | 7   | 19   | 10  | 3   | 7   | 3   | 7   | 16  | 14  |   |
| Gm20661 | 54  | 35  | 36   | 44   | 19   | 30   | 22   | 77  | 97  | 161 | 213 | 77  | 75  | 78  | 29  | 37  | 27   | 58   | 15   | 7   | 17   | 102 | 93  | 117 | 81  | 69  | 50  | 74  |   |
| Gm20695 | 2   | 1   | 0    | 11   | 4    | 1    | 3    | 7   | 6   | 0   | 10  | 4   | 6   | 6   | 3   | 5   | 2    | 6    | 3    | 2   | 2    | 7   | 6   | 0   | 3   | 0   | 3   | 5   |   |
| Gm20696 | 7   | 8   | 2    | 15   | 4    | 4    | 10   | 5   | 7   | 3   | 7   | 2   | 12  | 10  | 11  | 5   | 8    | 4    | 12   | 7   | 8    | 3   | 8   | 5   | 5   | 13  | 2   | 4   |   |
| Gm20715 | 15  | 6   | 2    | 32   | 13   | 19   | 7    | 17  | 7   | 22  | 21  | 5   | 5   | 10  | 17  | 9   | 20   | 25   | 23   | 29  | 13   | 25  | 8   | 9   | 21  | 8   | 6   | 2   |   |
| Gm20721 | 90  | 54  | 83   | 106  | 99   | 76   | 98   | 78  | 59  | 96  | 121 | 138 | 104 | 192 | 63  | 60  | 108  | 152  | 99   | 87  | 109  | 104 | 98  | 156 | 101 | 121 | 107 | 62  |   |
| Gm20878 | 1   | 0   | 0    | 0    | 0    | 0    | 0    | 0   | 0   | 0   | 0   | 0   | 0   | 0   | 0   | 0   | 0    | 0    | 0    | 0   | 0    | 0   | 0   | 0   | 0   | 0   | 0   | 0   | 0 |
| Gm20929 | 0   | 0   | 0    | 4    | 0    | 0    | 0    | 0   | 0   | 0   | 0   | 0   | 0   | 0   | 0   | 0   | 0    | 0    | 0    | 0   | 0    | 0   | 0   | 0   | 0   | 0   | 0   | 0   | 0 |
| Gm21028 | 7   | 19  | 11   | 12   | 26   | 24   | 31   | 28  | 8   | 14  | 18  | 11  | 15  | 14  | 30  | 13  | 14   | 28   | 13   | 19  | 16   | 23  | 18  | 22  | 9   | 11  | 3   | 12  |   |
| Gm21060 | 0   | 1   | 4    | 0    | 6    | 0    | 2    | 5   | 0   | 0   | 0   | 2   | 0   | 3   | 0   | 1   | 6    | 0    | 0    | 1   | 0    | 0   | 0   | 1   | 0   | 0   | 0   | 4   |   |
| Gm21103 | 8   | 1   | 3    | 2    | 0    | 5    | 1    | 0   | 0   | 0   | 0   | 0   | 0   | 3   | 3   | 2   | 1    | 0    | 1    | 3   | 1    | 0   | 0   | 0   | 0   | 0   | 5   | 0   |   |
| Gm21119 | 18  | 3   | 0    | 1    | 0    | 0    | 2    | 4   | 2   | 2   | 0   | 0   | 1   | 0   | 0   | 12  | 12   | 1    | 0    | 1   | 18   | 4   | 0   | 5   | 1   | 1   | 3   | 0   |   |
| Gm21115 | 52  | 54  | 41   | 39   | 92   | 97   | 54   | 159 | 157 | 138 | 156 | 128 | 130 | 156 | 47  | 28  | 82   | 64   | 83   | 62  | 83   | 202 | 220 | 134 | 126 | 117 | 182 | 151 |   |
| Gm21188 | 0   | 0   | 0    | 0    | 0    | 0    | 0    | 0   | 2   | 2   | 0   | 0   | 1   | 1   | 0   | 0   | 0    | 0    | 0    | 1   | 1    | 0   | 2   | 2   | 0   | 0   | 1   | 6   |   |
| Gm21258 | 0   | 0   | 0    | 0    | 0    | 0    | 0    | 0   | 0   | 0   | 0   | 1   | 0   | 0   | 0   | 0   | 0    | 0    | 0    | 0   | 0    | 0   | 0   | 0   | 0   | 0   | 0   | 0   | 0 |
| Gm21411 | 0   | 1   | 0    | 4    | 0    | 0    | 0    | 0   | 2   | 3   | 0   | 0   | 0   | 0   | 0   | 0   | 0    | 0    | 0    | 0   | 0    | 3   | 0   | 0   | 1   | 0   | 0   | 0   |   |
| Gm21560 | 0   | 1   | 0    | 0    | 0    | 0    | 0    | 1   | 1   | 0   | 0   | 0   | 1   | 2   | 0   | 0   | 0    | 0    | 0    | 0   | 0    | 0   | 1   | 2   | 0   | 2   | 0   | 0   |   |
| Gm21586 | 0   | 1   | 0    | 1    | 0    | 0    | 0    | 0   | 2   | 0   | 0   | 0   | 2   | 0   | 0   | 0   | 0    | 0    | 2    | 1   | 0    | 0   | 0   | 0   | 0   | 0   | 0   | 0   |   |
| Gm21650 | 0   | 0   | 0    | 0    | 0    | 0    | 0    | 0   | 0   | 0   | 0   | 0   | 1   | 0   | 0   | 0   | 0    | 0    | 0    | 0   | 0    | 0   | 0   | 0   | 0   | 0   | 0   | 0   |   |
| Gm21663 | 0   | 0   | 0    | 0    | 0    | 0    | 0    | 0   | 0   | 0   | 0   | 1   | 0   | 0   | 0   | 0   | 0    | 0    | 0    | 0   | 0    | 0   | 0   | 0   | 0   | 0   | 0   | 0   |   |
| Gm21671 | 0   | 0   | 0    | 0    | 0    | 0    | 0    | 0   | 0   | 0   | 0   | 0   | 0   | 0   | 0   | 0   | 0    | 0    | 0    | 0   | 0    | 2   | 0   | 0   | 0   | 0   | 2   | 0   |   |
| Gm21680 | 0   | 0   | 0    | 0    | 2    | 0    | 0    | 0   | 0   | 0   | 1   | 0   | 0   | 0   | 0   | 0   | 0    | 0    | 0    | 0   | 0    | 2   | 0   | 0   | 0   | 0   | 0   | 0   |   |
| Gm21698 | 0   | 0   | 0    | 0    | 0    | 0    | 0    | 0   | 1   | 0   | 0   | 0   | 0   | 0   | 0   | 0   | 0    | 0    | 0    | 0   | 0    | 0   | 0   | 0   | 0   | 0   | 0   | 0   |   |
| Gm21704 | 1   | 0   | 0    | 0    | 0    | 0    | 0    | 0   | 0   | 0   | 0   | 0   | 0   | 0   | 0   | 0   | 0    | 0    | 0    | 0   | 0    | 0   | 0   | 0   | 0   | 0   | 0   | 0   |   |
| Gm2174  | 0   | 0   | 0    | 0    | 0    | 0    | 0    | 1   | 2   | 0   | 0   | 0   | 0   | 1   | 0   | 2   | 0    | 0    | 0    | 0   | 0    | 0   | 0   | 0   | 0   | 0   | 3   | 0   | 0 |
| Gm21748 | 0   | 0   | 0    | 0    | 5    | 0    | 0    | 0   | 0   | 0   | 0   | 0   | 0   | 0   | 0   | 0   | 0    | 0    | 0    | 0   | 0    | 0   | 0   | 0   | 0   | 0   | 0   | 0   | 0 |
| Gm21750 | 1   | 3   | 0    | 4    | 0    | 0    | 1    | 0   | 0   | 0   | 0   | 0   | 0   | 0   | 1   | 0   | 1    | 0    | 2    | 0   | 2    | 0   | 0   | 0   | 0   | 0   | 0   | 0   |   |
| Gm21818 | 0   | 0   | 0    | 0    | 0    | 0    | 0    | 0   | 0   | 0   | 0   | 0   | 0   | 0   | 0   | 0   | 0    | 0    | 0    | 0   | 0    | 0   | 1   | 0   | 0   | 0   | 0   | 0   |   |
| Gm21830 | 0   | 0   | 0    | 0    | 1    | 0    | 0    | 0   | 1   | 0   | 0   | 0   | 0   | 0   | 0   | 0   | 0    | 0    | 0    | 0   | 0    | 0   | 0   | 0   | 0   | 0   | 0   | 0   |   |
| Gm21833 | 0   | 0   | 0    | 0    | 0    | 0    | 1    | 0   | 0   | 1   | 0   | 0   | 0   | 0   | 0   | 0   | 0    | 0    | 0    | 0   | 0    | 0   | 0   | 0   | 0   | 0   | 0   | 0   |   |
| Gm21885 | 0   | 0   | 0    | 0    | 0    | 0    | 0    | 0   | 0   | 0   | 0   | 0   | 0   | 0   | 0   | 0   | 0    | 0    | 0    | 0   | 0    | 3   | 0   | 0   | 0   | 2   | 0   | 0   |   |
| Gm21886 | 0   | 0   | 0    | 0    | 0    | 0    | 0    | 0   | 0   | 0   | 0   | 0   | 0   | 1   | 0   | 0   | 0    | 0    | 0    | 0   | 0    | 0   | 0   | 0   | 0   | 0   | 0   | 0   |   |
| Gm21915 | 0   | 0   | 0    | 0    | 0    | 0    | 0    | 0   | 2   | 0   | 0   | 0   | 3   | 0   | 0   | 0   | 0    | 0    | 0    | 0   | 0    | 0   | 0   | 1   | 0   | 0   | 0   | 0   |   |
| Gm21953 | 0   | 1   | 3    | 2    | 3    | 2    | 4    | 2   | 2   | 1   | 1   | 0   | 0   | 0   | 1   | 0   | 0    | 1    | 1    | 3   | 0    | 3   | 1   | 5   | 0   | 2   | 0   | 0   |   |
| Gm21958 | 0   | 0   | 0    | 1    | 3    | 0    | 1    | 0   | 0   | 0   | 0   | 4   | 0   | 0   | 1   | 0   | 2    | 0    | 2    | 0   | 0    | 0   | 0   | 4   | 0   | 0   | 0   | 0   |   |
| Gm21969 | 13  | 6   | 4    | 6    | 4    | 6    | 12   | 0   | 6   | 1   | 1   | 0   | 0   | 1   | 4   | 5   | 3    | 7    | 1    | 13  | 11   | 0   | 0   | 0   | 1   | 0   | 0   | 0   |   |
| Gm21976 | 0   | 3   | 8    | 4    | 2    | 1    | 3    | 6   | 1   | 2   | 1   | 1   | 2   | 0   | 4   | 8   | 1    | 2    | 5    | 8   | 4    | 3   | 4   | 1   | 4   | 1   | 0   | 5   |   |
| Gm21981 | 10  | 13  | 15   | 12   | 15   | 5    | 10   | 0   | 1   | 5   | 12  | 5   | 2   | 6   | 5   | 10  | 20   | 15   | 11   | 8   | 5    | 2   | 8   | 9   | 7   | 5   | 6   | 7   |   |
| Gm21985 | 1   | 0   | 0    | 0    | 0    | 1    | 0    | 0   | 0   | 0   | 0   | 0   | 0   | 0   | 0   | 0   | 0    | 2    | 0    | 0   | 1    | 0   | 0   | 0   | 1   | 0   | 0   | 1   |   |
| Gm21987 | 0   | 1   | 3    | 2    | 0    | 0    | 0    | 0   | 0   | 0   | 0   | 0   | 0   | 0   | 0   | 1   | 5    | 3    | 0    | 0   | 0    | 2   | 0   | 0   | 0   | 0   | 1   | 0   |   |
| Gm21988 | 3   | 7   | 2    | 9    | 4    | 1    | 4    | 2   | 0   | 1   | 1   | 0   | 2   | 3   | 0   | 2   | 5    | 2    | 3    | 1   | 6    | 0   | 1   | 5   | 0   | 0   | 1   | 2   |   |
| Gm21992 | 814 | 782 | 1244 | 1595 | 1046 | 1220 | 1582 | 277 | 289 | 475 | 483 | 538 | 562 | 630 | 663 | 719 | 1321 | 1563 | 1226 | 692 | 1459 | 506 | 237 | 558 | 459 | 656 | 524 | 570 |   |
| Gm21994 | 6   | 4   | 0    | 8    | 1    | 3    | 1    | 6   | 4   | 1   | 3   | 5   | 6   | 1   | 3   | 2   | 1    | 7    | 3    | 3   | 3    | 0   | 3   | 0   | 4   | 1   | 1   | 8   |   |
| Gm2237  | 345 | 234 | 431  | 460  | 488  | 405  | 408  | 713 | 632 | 647 | 645 | 730 | 610 | 736 | 389 | 328 | 337  | 358  | 388  | 446 | 436  | 662 | 555 | 669 | 722 | 742 | 623 | 654 |   |
| Gm2244  | 0   | 0   | 3    | 2    | 2    | 0    | 6    | 0   | 2   | 0   | 0   | 3   | 2   | 0   | 2   | 4   | 2    | 8    | 0    | 2   | 6    | 3   | 0   | 1   | 1   | 3   | 8   | 3   | 1 |
| Gm2296  | 403 | 366 | 332  | 300  | 244  | 305  | 217  | 286 | 207 | 201 | 204 | 307 | 254 | 220 | 413 | 354 | 297  | 273  | 300  | 333 | 199  | 257 | 195 | 273 | 265 | 349 | 294 | 247 |   |
| Gm2381  | 0   | 0   | 1    | 0    | 0    | 0    | 0    | 1   | 0   | 0   | 1   | 1   | 1   | 0   | 0   | 0   | 0    | 1    | 0    | 0   | 0    | 2   | 0   | 1   | 0   | 0   | 0   | 0   |   |
| Gm2411  | 0   | 3   | 0    | 1    | 2    | 6    | 0    | 0   | 0   | 0   | 3   | 0   | 2   | 4   | 3   | 0   | 6    | 0    | 0    | 0   | 0    | 0   | 5   | 0   | 0   | 0   | 1   | 1   |   |
| Gm26566 | 2   | 3   | 9    | 3    | 7    | 1    | 7    | 5   | 15  | 5   | 6   | 9   | 12  | 9   | 3   | 1   | 3    | 6    | 9    | 5   | 9    | 17  | 18  | 13  | 13  | 6   | 12  | 8   |   |
| Gm266   | 104 | 78  | 89   | 68   | 61   | 43   | 23   | 127 | 168 | 139 | 186 | 36  | 117 | 48  | 98  | 100 | 59   | 42   | 37   | 47  | 40   | 110 | 172 | 124 | 50  | 221 | 88  | 77  |   |
| Gm26602 | 0   | 0   | 0    | 2    | 1    | 0    | 0    | 0   | 2   | 0   | 2   | 0   | 0   | 1   | 1   | 1   | 0    | 1    | 1    | 0   | 1    | 3   | 1   | 0   | 3   | 1   | 1   | 2   |   |
| Gm26620 | 12  | 5   | 8    | 7    | 6    | 9    | 16   | 13  | 7   | 3   | 6   | 3   | 7   | 12  | 3   | 4   | 25   | 11   | 17   | 8   | 5    | 7   | 11  | 9   | 12  | 8   | 2   | 8   |   |
| Gm2663  | 0   | 0   | 0    | 0    | 0    | 0    | 0    | 0   | 0   | 0   | 0   | 0   | 0   | 0   | 0   | 0   | 0    | 0    | 0    | 0   | 0    | 0   | 0   | 0   | 0   | 0   | 1   | 0   |   |
| Gm26657 | 0   | 0   | 0    | 0    | 0    | 0    | 0    | 0   | 0   | 0   | 0   | 0   | 0   | 1   | 0   | 0   | 0    | 0    | 0    | 0   | 0    | 0   | 0   | 0   | 0   | 0   | 0   | 0   |   |
| Gm26741 | 0   | 0   | 0    | 0    | 0    | 0    | 0    | 0   | 0   | 0   | 0   | 0   | 1   | 2   | 0   | 0   | 0    | 2    | 0    | 0   | 0    | 0   | 0   |     |     |     |     |     |   |







|         |       |      |      |      |      |      |      |      |      |      |      |      |      |      |       |      |      |      |      |      |      |      |      |      |      |      |      |        |         |
|---------|-------|------|------|------|------|------|------|------|------|------|------|------|------|------|-------|------|------|------|------|------|------|------|------|------|------|------|------|--------|---------|
| Gm4631  | 9     | 2    | 37   | 7    | 1    | 2    | 1    | 4    | 2    | 34   | 4    | 3    | 1    | 3    | 1     | 2    | 43   | 2    | 13   | 10   | 4    | 3    | 11   | 1    | 8    | 1    | 0    | 4      | Gm4631  |
| Gm4724  | 17    | 7    | 4    | 7    | 9    | 8    | 17   | 33   | 12   | 3    | 6    | 22   | 5    | 11   | 36    | 15   | 9    | 1    | 13   | 9    | 13   | 12   | 7    | 9    | 6    | 8    | 7    | 8      | Gm4724  |
| Gm4737  | 1497  | 1468 | 1391 | 953  | 738  | 889  | 683  | 1071 | 1234 | 836  | 1013 | 1312 | 1168 | 1092 | 1290  | 1365 | 1176 | 835  | 880  | 833  | 747  | 795  | 1097 | 1044 | 943  | 1463 | 1330 | 1275   | Gm4737  |
| Gm47429 | 0     | 0    | 0    | 0    | 0    | 0    | 0    | 0    | 1    | 0    | 1    | 0    | 0    | 0    | 0     | 0    | 0    | 0    | 0    | 0    | 0    | 0    | 1    | 0    | 0    | 0    | 1    | 0      | Gm47429 |
| Gm4756  | 0     | 0    | 0    | 0    | 0    | 0    | 1    | 0    | 0    | 0    | 0    | 0    | 0    | 0    | 0     | 0    | 0    | 0    | 0    | 0    | 0    | 3    | 0    | 0    | 0    | 0    | 0    | 1      | Gm4756  |
| Gm4767  | 8     | 9    | 1    | 6    | 7    | 5    | 2    | 7    | 3    | 3    | 3    | 3    | 41   | 14   | 53    | 8    | 5    | 12   | 8    | 9    | 14   | 7    | 14   | 17   | 7    | 8    | 7    | 13     | Gm4767  |
| Gm4779  | 5     | 7    | 1    | 0    | 4    | 3    | 2    | 15   | 3    | 5    | 21   | 8    | 20   | 19   | 0     | 2    | 23   | 0    | 2    | 3    | 0    | 35   | 14   | 0    | 2    | 1    | 0    | 1      | Gm4779  |
| Gm47791 | 1     | 0    | 0    | 0    | 0    | 0    | 0    | 0    | 0    | 0    | 0    | 0    | 0    | 0    | 0     | 0    | 0    | 0    | 2    | 1    | 0    | 0    | 0    | 0    | 0    | 1    | 0    | 0      | Gm47791 |
| Gm4787  | 61    | 86   | 91   | 73   | 79   | 109  | 72   | 111  | 96   | 41   | 68   | 46   | 81   | 77   | 90    | 97   | 71   | 72   | 60   | 104  | 62   | 107  | 63   | 74   | 94   | 60   | 108  | 84     | Gm4787  |
| Gm4791  | 5     | 0    | 0    | 1    | 0    | 5    | 0    | 11   | 9    | 3    | 7    | 0    | 0    | 2    | 1     | 0    | 0    | 0    | 0    | 0    | 0    | 0    | 10   | 17   | 4    | 16   | 0    | 0      | Gm4791  |
| Gm4792  | 1     | 2    | 5    | 2    | 4    | 1    | 3    | 4    | 5    | 5    | 3    | 10   | 6    | 11   | 3     | 1    | 2    | 0    | 5    | 0    | 0    | 3    | 4    | 5    | 3    | 3    | 14   | 8      | Gm4792  |
| Gm47955 | 0     | 0    | 0    | 0    | 0    | 0    | 0    | 0    | 0    | 0    | 0    | 0    | 0    | 0    | 0     | 0    | 0    | 0    | 0    | 0    | 0    | 0    | 0    | 1    | 0    | 0    | 0    | 1      | Gm47955 |
| Gm47959 | 0     | 0    | 0    | 0    | 0    | 0    | 0    | 0    | 0    | 0    | 0    | 0    | 0    | 0    | 0     | 0    | 0    | 0    | 0    | 0    | 0    | 0    | 0    | 0    | 0    | 0    | 0    | 0      | Gm47959 |
| Gm47969 | 0     | 0    | 0    | 0    | 0    | 0    | 1    | 1    | 0    | 2    | 0    | 0    | 0    | 0    | 0     | 0    | 0    | 0    | 0    | 0    | 0    | 2    | 0    | 0    | 2    | 0    | 0    | 0      | Gm47969 |
| Gm47985 | 2     | 8    | 10   | 1    | 10   | 3    | 7    | 23   | 18   | 8    | 1    | 18   | 70   | 24   | 12    | 2    | 6    | 9    | 3    | 13   | 0    | 8    | 10   | 7    | 5    | 12   | 20   | 72     | Gm47985 |
| Gm47995 | 0     | 0    | 0    | 0    | 0    | 0    | 0    | 0    | 0    | 0    | 0    | 0    | 1    | 0    | 0     | 0    | 2    | 0    | 0    | 0    | 0    | 0    | 2    | 2    | 0    | 5    | 2    | 4      | Gm47995 |
| Gm47996 | 0     | 0    | 0    | 0    | 0    | 0    | 0    | 0    | 0    | 0    | 0    | 0    | 0    | 0    | 0     | 0    | 0    | 0    | 0    | 0    | 0    | 0    | 1    | 0    | 0    | 1    | 0    | 1      | Gm47996 |
| Gm4841  | 0     | 0    | 0    | 0    | 1    | 0    | 0    | 5    | 3    | 3    | 2    | 1    | 2    | 0    | 0     | 0    | 0    | 0    | 0    | 1    | 0    | 0    | 3    | 16   | 1    | 18   | 0    | 1      | Gm4841  |
| Gm4846  | 0     | 0    | 0    | 0    | 0    | 0    | 0    | 0    | 2    | 0    | 0    | 0    | 0    | 0    | 0     | 0    | 0    | 0    | 0    | 0    | 0    | 3    | 1    | 1    | 0    | 9    | 3    | 0      | Gm4846  |
| Gm48551 | 16    | 22   | 4    | 15   | 16   | 19   | 27   | 22   | 7    | 8    | 7    | 15   | 9    | 16   | 22    | 13   | 21   | 32   | 9    | 24   | 22   | 13   | 5    | 15   | 11   | 1    | 5    | 9      | Gm48551 |
| Gm48552 | 108   | 135  | 136  | 186  | 102  | 116  | 107  | 89   | 69   | 80   | 61   | 74   | 71   | 49   | 119   | 143  | 134  | 164  | 129  | 104  | 84   | 94   | 69   | 67   | 68   | 71   | 49   | 53     | Gm48552 |
| Gm4871  | 0     | 0    | 0    | 0    | 0    | 0    | 0    | 0    | 0    | 0    | 0    | 0    | 1    | 0    | 0     | 0    | 0    | 0    | 0    | 0    | 0    | 0    | 1    | 0    | 0    | 0    | 0    | 0      | Gm4871  |
| Gm4894  | 0     | 0    | 0    | 0    | 2    | 1    | 0    | 0    | 1    | 0    | 0    | 0    | 0    | 0    | 0     | 0    | 0    | 0    | 0    | 0    | 0    | 0    | 1    | 0    | 1    | 0    | 1    | 0      | Gm4894  |
| Gm49027 | 93    | 103  | 72   | 110  | 165  | 111  | 111  | 83   | 133  | 126  | 132  | 136  | 115  | 110  | 98    | 114  | 96   | 122  | 108  | 92   | 103  | 165  | 93   | 91   | 158  | 73   | 115  | 117    | Gm49027 |
| Gm4922  | 0     | 0    | 0    | 0    | 0    | 0    | 0    | 1    | 0    | 0    | 0    | 0    | 0    | 0    | 0     | 0    | 0    | 0    | 0    | 0    | 0    | 0    | 0    | 0    | 0    | 0    | 0    | 0      | Gm4922  |
| Gm4924  | 384   | 351  | 679  | 453  | 576  | 511  | 611  | 965  | 1004 | 1056 | 892  | 1127 | 1112 | 1142 | 555   | 398  | 666  | 475  | 599  | 532  | 512  | 1200 | 942  | 1074 | 980  | 1157 | 1146 | 1101   | Gm4924  |
| Gm49322 | 95    | 143  | 178  | 155  | 143  | 134  | 120  | 147  | 151  | 194  | 217  | 293  | 220  | 222  | 74    | 93   | 145  | 154  | 177  | 134  | 123  | 196  | 170  | 265  | 225  | 199  | 237  | 225    | Gm49322 |
| Gm49336 | 10112 | 7432 | 8301 | 8658 | 8341 | 8744 | 9767 | 8327 | 6654 | 5633 | 5777 | 6347 | 6338 | 6760 | 10669 | 9371 | 7829 | 8307 | 7930 | 9856 | 9247 | 7265 | 6521 | 5937 | 6494 | 6419 | 6938 | 6868   | Gm49336 |
| Gm49355 | 5     | 3    | 1    | 1    | 5    | 8    | 4    | 7    | 3    | 6    | 2    | 5    | 1    | 1    | 9     | 1    | 0    | 2    | 2    | 10   | 0    | 5    | 1    | 4    | 2    | 9    | 1    | 7      | Gm49355 |
| Gm49373 | 3     | 2    | 9    | 9    | 5    | 1    | 6    | 10   | 3    | 4    | 8    | 9    | 6    | 10   | 5     | 1    | 7    | 0    | 2    | 3    | 8    | 8    | 6    | 9    | 8    | 2    | 1    | 7      | Gm49373 |
| Gm49380 | 15    | 2    | 23   | 22   | 12   | 12   | 17   | 2    | 6    | 3    | 12   | 8    | 8    | 13   | 16    | 11   | 6    | 26   | 12   | 5    | 4    | 7    | 6    | 12   | 12   | 15   | 5    | 17     | Gm49380 |
| Gm49383 | 29    | 10   | 11   | 36   | 33   | 35   | 28   | 13   | 5    | 12   | 8    | 5    | 5    | 10   | 15    | 28   | 31   | 46   | 19   | 22   | 27   | 7    | 4    | 3    | 11   | 7    | 14   | 11     | Gm49383 |
| Gm49394 | 0     | 0    | 2    | 0    | 2    | 0    | 0    | 2    | 7    | 10   | 28   | 0    | 2    | 0    | 0     | 3    | 5    | 2    | 0    | 0    | 1    | 5    | 21   | 1    | 5    | 0    | 2    | 2      | Gm49394 |
| Gm49395 | 7     | 6    | 7    | 17   | 20   | 9    | 11   | 10   | 3    | 5    | 19   | 13   | 10   | 17   | 11    | 5    | 5    | 6    | 14   | 7    | 4    | 10   | 6    | 7    | 18   | 5    | 1    | 5      | Gm49395 |
| Gm49396 | 104   | 73   | 116  | 104  | 137  | 118  | 159  | 289  | 199  | 313  | 214  | 264  | 244  | 330  | 99    | 83   | 103  | 114  | 118  | 109  | 141  | 324  | 206  | 304  | 272  | 283  | 231  | 311    | Gm49396 |
| Gm49405 | 180   | 233  | 242  | 295  | 317  | 230  | 350  | 263  | 291  | 403  | 307  | 311  | 253  | 368  | 231   | 151  | 309  | 352  | 353  | 219  | 356  | 359  | 284  | 404  | 359  | 310  | 252  | 332    | Gm49405 |
| Gm49425 | 0     | 0    | 0    | 0    | 0    | 1    | 0    | 0    | 0    | 0    | 0    | 0    | 0    | 0    | 0     | 0    | 0    | 0    | 0    | 0    | 0    | 0    | 0    | 0    | 0    | 0    | 0    | 0      | Gm49425 |
| Gm49486 | 69    | 47   | 75   | 116  | 88   | 72   | 78   | 38   | 39   | 41   | 49   | 27   | 41   | 48   | 67    | 57   | 97   | 64   | 69   | 61   | 93   | 50   | 43   | 56   | 37   | 46   | 26   | 51     | Gm49486 |
| Gm4951  | 2     | 1    | 1    | 6    | 3    | 11   | 4    | 13   | 6    | 5    | 17   | 8    | 12   | 13   | 7     | 6    | 0    | 0    | 24   | 4    | 32   | 20   | 15   | 19   | 5    | 21   | 28   | Gm4951 |         |
| Gm4952  | 14    | 16   | 13   | 10   | 12   | 19   | 17   | 2    | 4    | 5    | 6    | 0    | 1    | 2    | 24    | 20   | 7    | 22   | 7    | 9    | 16   | 5    | 2    | 2    | 1    | 5    | 1    | 2      | Gm4952  |
| Gm49601 | 257   | 359  | 486  | 453  | 540  | 462  | 435  | 414  | 452  | 506  | 500  | 532  | 417  | 622  | 289   | 291  | 421  | 517  | 509  | 363  | 556  | 642  | 372  | 601  | 633  | 426  | 431  | 446    | Gm49601 |
| Gm49673 | 7     | 5    | 3    | 5    | 2    | 7    | 0    | 0    | 3    | 0    | 0    | 0    | 9    | 4    | 7     | 2    | 2    | 2    | 2    | 1    | 4    | 0    | 5    | 0    | 2    | 0    | 1    | 0      | Gm49673 |
| Gm49711 | 21    | 20   | 17   | 21   | 40   | 18   | 34   | 2    | 2    | 10   | 8    | 1    | 8    | 12   | 44    | 23   | 36   | 34   | 42   | 24   | 50   | 3    | 10   | 7    | 5    | 13   | 3    | 1      | Gm49711 |
| Gm49721 | 7     | 7    | 0    | 7    | 7    | 7    | 10   | 2    | 5    | 4    | 3    | 3    | 12   | 5    | 7     | 9    | 9    | 3    | 9    | 9    | 4    | 3    | 9    | 0    | 8    | 0    | 8    | 0      | Gm49721 |
| Gm50092 | 0     | 1    | 0    | 3    | 1    | 1    | 1    | 6    | 1    | 3    | 1    | 1    | 3    | 2    | 7     | 0    | 3    | 3    | 1    | 3    | 1    | 0    | 3    | 4    | 6    | 2    | 5    | 0      | Gm50092 |
| Gm50253 | 18    | 20   | 20   | 21   | 18   | 15   | 11   | 13   | 9    | 14   | 10   | 23   | 15   | 15   | 12    | 10   | 29   | 13   | 13   | 7    | 43   | 23   | 9    | 11   | 19   | 20   | 8    | 27     | Gm50253 |
| Gm50364 | 9     | 9    | 0    | 11   | 6    | 8    | 8    | 18   | 14   | 6    | 8    | 14   | 9    | 4    | 13    | 8    | 8    | 6    | 7    | 15   | 4    | 8    | 8    | 6    | 12   | 13   | 7    | 9      | Gm50364 |
| Gm50387 | 265   | 282  | 275  | 333  | 270  | 227  | 365  | 223  | 189  | 184  | 203  | 167  | 124  | 223  | 276   | 254  | 286  | 362  | 253  | 256  | 371  | 269  | 184  | 214  | 209  | 184  | 160  | 202    | Gm50387 |
| Gm50388 | 1     | 0    | 0    | 0    | 0    | 0    | 1    | 0    | 0    | 0    | 1    | 1    | 0    | 0    | 5     | 2    | 0    | 0    | 0    | 1    | 4    | 0    | 0    | 1    | 0    | 0    | 0    | 0      | Gm50388 |
| Gm50457 | 2     | 1    | 6    | 3    | 4    | 1    | 3    | 7    | 5    | 1    | 2    | 1    | 1    | 3    | 3     | 1    | 1    | 0    | 0    | 2    | 2    | 3    | 3    | 2    | 0    | 1    | 0    | 0      | Gm50457 |
| Gm5065  | 0     | 0    | 0    | 0    | 1    | 0    | 0    | 0    | 0    | 0    | 0    | 0    | 0    | 0    | 0     | 0    | 0    | 7    | 0    | 3    | 1    | 0    | 0    | 0    | 0    | 0    | 0    | 0      | Gm5065  |
| Gm5096  | 1     | 2    | 0    | 0    | 3    | 2    | 1    | 2    | 6    | 8    | 3    | 3    | 5    | 0    | 1     | 5    | 0    | 0    | 2    | 2    | 3    | 8    | 10   | 0    | 0    | 0    | 0    | 0      | Gm5096  |
| Gm5105  | 8     | 5    | 15   | 16   | 16   | 6    | 9    | 2    | 2    | 8    | 17   | 4    | 8    | 1    | 8     | 9    | 13   | 8    | 8    | 14   | 6    | 10   | 9    | 4    | 6    | 2    | 0    | 5      | Gm5105  |
| Gm5108  | 0     | 1    | 0    | 0    | 2    | 0    | 0    | 0    | 0    | 0    | 0    | 0    | 0    | 0    | 0     | 2    | 0    | 0    | 0    | 0    | 1    | 0    | 0    | 0    | 0    | 0    | 0    | 0      | Gm5108  |
| Gm5127  | 47    | 37   | 67   | 13   | 21   | 14   | 4    | 29   | 33   | 37   | 33   | 34   | 48   | 15   | 49    | 96   | 31   | 9    | 4    | 4    | 9    | 35   | 16   | 28   | 17   | 51   | 52   | 21     | Gm5127  |
| Gm5134  | 1     | 3    | 2    | 1    | 2    | 3    | 7    | 2    | 11   | 1    | 4    | 1    | 8    | 7    | 7     | 3    | 9    | 3    | 2    | 2    | 4    | 13   | 6    | 2    | 7    | 12   | 3    | 4      | Gm5134  |
| Gm5136  | 5     | 1    | 9    | 18   | 10   | 12   | 19   | 4    | 2    | 14   | 6    | 16   | 15   | 11   | 1     | 6    | 15   | 15   | 9    | 3    | 20   | 17   | 1    | 9    | 13   | 16   | 3    | 12     | Gm5136  |
| Gm5141  | 901   | 645  | 932  | 787  | 938  | 940  | 949  | 1072 | 951  | 912  | 818  | 923  | 855  | 841  | 1068  | 942  | 862  | 813  | 1004 | 1078 | 919  | 937  | 884  | 903  | 905  | 1055 | 910  | 849    | Gm5141  |
| Gm5148  | 241   | 181  | 209  | 246  | 275  | 269  | 294  | 189  | 206  | 210  | 186  | 137  | 172  | 137  | 214   |      |      |      |      |      |      |      |      |      |      |      |      |        |         |

|        |      |      |      |      |      |      |      |      |      |      |      |      |      |      |      |      |      |      |      |      |      |      |      |      |      |      |      |      |        |        |
|--------|------|------|------|------|------|------|------|------|------|------|------|------|------|------|------|------|------|------|------|------|------|------|------|------|------|------|------|------|--------|--------|
| Gm572  | 1    | 0    | 0    | 0    | 1    | 2    | 0    | 1    | 5    | 0    | 10   | 0    | 0    | 1    | 0    | 1    | 0    | 0    | 2    | 6    | 0    | 5    | 12   | 2    | 0    | 9    | 1    | 0    | Gm572  |        |
| Gm5724 | 0    | 0    | 0    | 0    | 0    | 3    | 0    | 1    | 2    | 0    | 0    | 0    | 0    | 0    | 1    | 0    | 0    | 0    | 0    | 0    | 3    | 0    | 2    | 0    | 0    | 3    | 0    | 0    | Gm5724 |        |
| Gm5737 | 13   | 20   | 17   | 34   | 21   | 37   | 22   | 5    | 12   | 5    | 8    | 7    | 7    | 2    | 8    | 16   | 19   | 21   | 28   | 25   | 37   | 10   | 10   | 4    | 1    | 0    | 6    | 4    | Gm5737 |        |
| Gm5741 | 1    | 6    | 9    | 10   | 5    | 4    | 3    | 2    | 8    | 12   | 7    | 4    | 9    | 5    | 3    | 0    | 7    | 7    | 7    | 5    | 5    | 3    | 6    | 7    | 2    | 8    | 1    | 12   | Gm5741 |        |
| Gm5751 | 0    | 0    | 0    | 0    | 0    | 0    | 0    | 5    | 0    | 0    | 0    | 0    | 0    | 0    | 0    | 0    | 0    | 0    | 0    | 0    | 0    | 0    | 0    | 0    | 0    | 0    | 0    | 0    | Gm5751 |        |
| Gm5767 | 0    | 0    | 0    | 0    | 0    | 0    | 0    | 1    | 1    | 0    | 0    | 0    | 0    | 0    | 0    | 0    | 0    | 0    | 0    | 2    | 0    | 0    | 1    | 0    | 0    | 0    | 0    | 0    | Gm5767 |        |
| Gm5771 | 0    | 0    | 0    | 0    | 0    | 0    | 0    | 0    | 0    | 0    | 2    | 0    | 0    | 0    | 0    | 0    | 0    | 0    | 0    | 0    | 0    | 0    | 1    | 0    | 0    | 0    | 0    | 0    | Gm5771 |        |
| Gm5795 | 0    | 0    | 0    | 0    | 0    | 0    | 1    | 0    | 0    | 0    | 0    | 0    | 0    | 0    | 0    | 1    | 1    | 0    | 1    | 1    | 2    | 0    | 2    | 0    | 0    | 0    | 0    | 0    | Gm5795 |        |
| Gm5796 | 28   | 12   | 34   | 19   | 61   | 56   | 46   | 176  | 171  | 132  | 127  | 140  | 86   | 134  | 24   | 28   | 13   | 37   | 47   | 71   | 34   | 224  | 142  | 142  | 187  | 184  | 117  | 135  | Gm5796 |        |
| Gm5797 | 0    | 0    | 0    | 0    | 0    | 0    | 0    | 0    | 0    | 0    | 0    | 0    | 0    | 0    | 0    | 0    | 0    | 0    | 0    | 0    | 0    | 0    | 0    | 0    | 1    | 0    | 0    | 0    | Gm5797 |        |
| Gm5800 | 0    | 0    | 1    | 0    | 0    | 0    | 0    | 0    | 0    | 0    | 0    | 0    | 0    | 0    | 0    | 1    | 0    | 0    | 0    | 0    | 0    | 0    | 0    | 0    | 0    | 0    | 0    | 0    | Gm5800 |        |
| Gm5901 | 0    | 0    | 0    | 1    | 0    | 1    | 0    | 1    | 0    | 0    | 0    | 0    | 0    | 1    | 1    | 0    | 3    | 0    | 2    | 1    | 0    | 0    | 0    | 0    | 0    | 5    | 0    | 0    | Gm5901 |        |
| Gm5930 | 0    | 0    | 0    | 0    | 0    | 0    | 0    | 0    | 2    | 0    | 3    | 0    | 0    | 0    | 0    | 0    | 0    | 0    | 0    | 0    | 0    | 0    | 1    | 0    | 0    | 0    | 0    | 0    | Gm5930 |        |
| Gm5941 | 0    | 0    | 0    | 0    | 0    | 0    | 0    | 0    | 0    | 0    | 0    | 0    | 0    | 0    | 0    | 0    | 0    | 0    | 0    | 0    | 0    | 0    | 0    | 0    | 0    | 0    | 0    | 2    | Gm5941 |        |
| Gm5945 | 0    | 0    | 1    | 1    | 0    | 1    | 3    | 1    | 1    | 1    | 0    | 1    | 0    | 0    | 0    | 0    | 0    | 1    | 0    | 0    | 3    | 0    | 1    | 0    | 1    | 0    | 1    | 0    | Gm5945 |        |
| Gm6020 | 5    | 2    | 0    | 4    | 7    | 12   | 1    | 4    | 6    | 8    | 6    | 10   | 9    | 7    | 0    | 4    | 0    | 1    | 2    | 8    | 3    | 2    | 3    | 1    | 5    | 1    | 3    | 0    | Gm6020 |        |
| Gm6034 | 8    | 15   | 6    | 14   | 18   | 19   | 11   | 2    | 4    | 3    | 0    | 1    | 1    | 5    | 5    | 10   | 12   | 8    | 11   | 22   | 11   | 2    | 6    | 0    | 4    | 0    | 3    | 1    | Gm6034 |        |
| Gm609  | 0    | 0    | 0    | 0    | 0    | 0    | 0    | 0    | 0    | 6    | 0    | 0    | 0    | 0    | 0    | 0    | 0    | 0    | 0    | 0    | 0    | 0    | 0    | 0    | 0    | 0    | 0    | 0    | 1      | Gm609  |
| Gm6133 | 0    | 1    | 0    | 0    | 3    | 4    | 0    | 1    | 2    | 8    | 6    | 0    | 0    | 0    | 1    | 1    | 1    | 0    | 2    | 1    | 0    | 5    | 1    | 0    | 4    | 4    | 0    | 0    | Gm6133 |        |
| Gm614  | 0    | 1    | 0    | 0    | 0    | 0    | 0    | 0    | 3    | 0    | 0    | 1    | 2    | 0    | 1    | 0    | 0    | 0    | 2    | 5    | 0    | 0    | 1    | 1    | 0    | 4    | 0    | 0    | Gm614  |        |
| Gm6169 | 120  | 91   | 82   | 47   | 63   | 82   | 78   | 134  | 147  | 97   | 126  | 128  | 121  | 127  | 112  | 111  | 58   | 51   | 70   | 67   | 56   | 104  | 166  | 119  | 106  | 136  | 135  | 146  | Gm6169 |        |
| Gm6268 | 2    | 0    | 0    | 0    | 0    | 0    | 0    | 0    | 0    | 0    | 0    | 0    | 0    | 0    | 0    | 0    | 0    | 0    | 0    | 0    | 0    | 0    | 0    | 0    | 0    | 0    | 0    | 0    | Gm6268 |        |
| Gm6309 | 0    | 0    | 0    | 1    | 0    | 2    | 1    | 0    | 0    | 0    | 0    | 0    | 0    | 0    | 1    | 1    | 0    | 0    | 0    | 0    | 0    | 0    | 0    | 0    | 0    | 0    | 0    | 0    | Gm6309 |        |
| Gm6337 | 0    | 0    | 0    | 0    | 0    | 0    | 2    | 0    | 0    | 0    | 0    | 0    | 0    | 0    | 0    | 0    | 0    | 0    | 0    | 0    | 0    | 0    | 0    | 0    | 0    | 0    | 0    | 0    | Gm6337 |        |
| Gm6356 | 0    | 0    | 0    | 0    | 1    | 0    | 1    | 2    | 0    | 0    | 0    | 0    | 0    | 1    | 0    | 0    | 0    | 0    | 0    | 0    | 0    | 0    | 0    | 0    | 1    | 1    | 1    | 0    | Gm6356 |        |
| Gm6370 | 0    | 0    | 0    | 0    | 0    | 0    | 1    | 0    | 0    | 0    | 0    | 0    | 0    | 0    | 0    | 0    | 0    | 0    | 0    | 0    | 0    | 0    | 0    | 0    | 0    | 0    | 0    | 0    | Gm6370 |        |
| Gm6377 | 17   | 8    | 16   | 36   | 20   | 33   | 26   | 24   | 12   | 15   | 21   | 13   | 3    | 12   | 11   | 10   | 21   | 20   | 41   | 16   | 33   | 17   | 10   | 17   | 8    | 7    | 17   | 12   | Gm6377 |        |
| Gm6408 | 12   | 14   | 25   | 38   | 37   | 40   | 27   | 1    | 3    | 10   | 4    | 0    | 0    | 3    | 13   | 16   | 14   | 25   | 19   | 19   | 22   | 0    | 1    | 1    | 1    | 4    | 0    | 1    | Gm6408 |        |
| Gm648  | 3    | 14   | 16   | 10   | 7    | 10   | 8    | 9    | 7    | 14   | 9    | 4    | 3    | 6    | 15   | 7    | 14   | 26   | 16   | 5    | 12   | 3    | 6    | 11   | 19   | 7    | 3    | 8    | Gm648  |        |
| Gm6482 | 0    | 0    | 0    | 0    | 0    | 0    | 0    | 0    | 1    | 0    | 0    | 0    | 0    | 0    | 0    | 0    | 0    | 0    | 0    | 0    | 0    | 2    | 2    | 0    | 0    | 0    | 0    | 0    | Gm6482 |        |
| Gm6525 | 10   | 14   | 14   | 16   | 6    | 21   | 12   | 13   | 12   | 5    | 18   | 16   | 14   | 9    | 8    | 16   | 13   | 13   | 17   | 7    | 13   | 8    | 16   | 12   | 5    | 15   | 10   | 8    | Gm6525 |        |
| Gm6526 | 0    | 0    | 0    | 3    | 0    | 0    | 0    | 0    | 0    | 0    | 0    | 0    | 0    | 0    | 0    | 0    | 0    | 0    | 0    | 0    | 0    | 0    | 2    | 0    | 0    | 0    | 0    | 1    | Gm6526 |        |
| Gm6569 | 1    | 5    | 3    | 0    | 3    | 2    | 0    | 1    | 1    | 0    | 0    | 2    | 3    | 0    | 0    | 2    | 0    | 2    | 12   | 1    | 3    | 2    | 2    | 0    | 0    | 0    | 0    | 2    | Gm6569 |        |
| Gm6583 | 1    | 0    | 4    | 0    | 3    | 0    | 0    | 1    | 2    | 0    | 1    | 0    | 5    | 3    | 1    | 1    | 0    | 0    | 2    | 1    | 1    | 0    | 7    | 1    | 0    | 0    | 5    | 1    | Gm6583 |        |
| Gm6588 | 0    | 0    | 0    | 0    | 0    | 0    | 0    | 0    | 0    | 0    | 0    | 0    | 0    | 0    | 0    | 0    | 0    | 0    | 0    | 0    | 0    | 0    | 0    | 2    | 0    | 0    | 0    | 0    | Gm6588 |        |
| Gm6592 | 0    | 0    | 0    | 0    | 0    | 0    | 0    | 0    | 0    | 0    | 0    | 0    | 0    | 0    | 0    | 0    | 0    | 0    | 0    | 0    | 0    | 0    | 0    | 0    | 0    | 0    | 3    | 0    | Gm6592 |        |
| Gm6614 | 2    | 2    | 1    | 1    | 0    | 12   | 0    | 2    | 10   | 3    | 11   | 8    | 14   | 5    | 1    | 0    | 0    | 0    | 2    | 2    | 6    | 2    | 10   | 6    | 10   | 17   | 14   | 9    | Gm6614 |        |
| Gm6619 | 0    | 0    | 0    | 0    | 0    | 0    | 0    | 0    | 0    | 0    | 0    | 0    | 0    | 0    | 0    | 0    | 0    | 0    | 0    | 0    | 0    | 0    | 1    | 0    | 0    | 0    | 0    | 0    | Gm6619 |        |
| Gm6657 | 0    | 0    | 0    | 0    | 0    | 0    | 0    | 0    | 0    | 0    | 5    | 0    | 0    | 0    | 4    | 0    | 0    | 0    | 0    | 0    | 1    | 0    | 0    | 2    | 0    | 0    | 0    | 0    | Gm6657 |        |
| Gm6710 | 126  | 367  | 101  | 99   | 410  | 162  | 375  | 302  | 154  | 153  | 291  | 147  | 171  | 231  | 624  | 494  | 343  | 111  | 232  | 338  | 102  | 149  | 481  | 125  | 551  | 182  | 429  | 120  | Gm6710 |        |
| Gm6760 | 0    | 0    | 0    | 0    | 0    | 0    | 1    | 0    | 0    | 0    | 0    | 0    | 0    | 0    | 0    | 0    | 0    | 0    | 0    | 0    | 0    | 0    | 0    | 0    | 0    | 0    | 0    | 0    | Gm6760 |        |
| Gm6812 | 0    | 0    | 0    | 0    | 0    | 0    | 0    | 0    | 0    | 0    | 0    | 0    | 0    | 1    | 1    | 0    | 0    | 0    | 0    | 0    | 0    | 0    | 0    | 0    | 0    | 0    | 0    | 0    | Gm6812 |        |
| Gm6871 | 0    | 1    | 2    | 0    | 0    | 5    | 0    | 2    | 2    | 1    | 0    | 1    | 0    | 4    | 1    | 1    | 0    | 1    | 0    | 0    | 0    | 0    | 1    | 0    | 2    | 0    | 3    | 0    | Gm6871 |        |
| Gm7030 | 0    | 1    | 1    | 0    | 0    | 1    | 1    | 0    | 0    | 0    | 0    | 0    | 0    | 1    | 1    | 0    | 0    | 0    | 0    | 0    | 1    | 0    | 0    | 0    | 0    | 0    | 0    | 1    | Gm7030 |        |
| Gm7072 | 1961 | 1318 | 2016 | 1888 | 2026 | 2087 | 2148 | 2674 | 2556 | 2454 | 2266 | 2405 | 2384 | 2394 | 2106 | 1893 | 2073 | 1887 | 1907 | 2121 | 1841 | 2620 | 2374 | 2369 | 2272 | 2219 | 2322 | 2401 | Gm7072 |        |
| Gm7075 | 6    | 4    | 2    | 4    | 11   | 8    | 4    | 4    | 2    | 0    | 0    | 1    | 0    | 1    | 5    | 9    | 5    | 3    | 15   | 3    | 4    | 0    | 2    | 7    | 5    | 3    | 2    | 2    | Gm7075 |        |
| Gm7102 | 2    | 5    | 3    | 0    | 2    | 0    | 1    | 1    | 2    | 6    | 0    | 0    | 1    | 2    | 1    | 5    | 2    | 0    | 2    | 1    | 0    | 2    | 3    | 1    | 1    | 1    | 1    | 6    | Gm7102 |        |
| Gm7168 | 3    | 3    | 4    | 6    | 7    | 1    | 2    | 2    | 1    | 6    | 1    | 5    | 3    | 1    | 3    | 2    | 0    | 3    | 5    | 5    | 3    | 2    | 4    | 0    | 2    | 0    | 0    | 1    | Gm7168 |        |
| Gm7233 | 3    | 0    | 0    | 0    | 1    | 0    | 0    | 4    | 2    | 0    | 0    | 0    | 2    | 0    | 0    | 1    | 2    | 0    | 0    | 0    | 0    | 0    | 3    | 1    | 0    | 0    | 0    | 1    | Gm7233 |        |
| Gm7247 | 8    | 3    | 5    | 2    | 7    | 6    | 2    | 5    | 7    | 3    | 6    | 2    | 0    | 9    | 1    | 0    | 7    | 1    | 2    | 1    | 2    | 5    | 3    | 6    | 2    | 0    | 0    | 4    | Gm7247 |        |
| Gm7271 | 24   | 22   | 0    | 0    | 38   | 0    | 0    | 60   | 34   | 33   | 39   | 1    | 60   | 2    | 61   | 39   | 1    | 21   | 2    | 5    | 1    | 67   | 19   | 0    | 33   | 0    | 5    | 2    | Gm7271 |        |
| Gm7298 | 0    | 0    | 0    | 0    | 2    | 0    | 3    | 0    | 0    | 0    | 3    | 0    | 0    | 1    | 0    | 0    | 0    | 0    | 0    | 0    | 0    | 0    | 1    | 0    | 0    | 0    | 0    | 0    | Gm7298 |        |
| Gm7324 | 82   | 70   | 80   | 67   | 44   | 78   | 69   | 159  | 68   | 61   | 51   | 72   | 71   | 87   | 136  | 77   | 71   | 62   | 76   | 84   | 70   | 99   | 57   | 83   | 77   | 102  | 79   | 80   | Gm7324 |        |
| Gm7347 | 0    | 0    | 0    | 0    | 0    | 0    | 0    | 0    | 0    | 0    | 1    | 0    | 0    | 0    | 0    | 0    | 0    | 0    | 0    | 0    | 0    | 0    | 0    | 0    | 0    | 0    | 0    | 0    | Gm7347 |        |
| Gm7358 | 0    | 1    | 0    | 0    | 0    | 0    | 0    | 0    | 0    | 0    | 0    | 0    | 0    | 0    | 0    | 0    | 0    | 0    | 0    | 0    | 0    | 0    | 0    | 0    | 0    | 0    | 0    | 0    | Gm7358 |        |
| Gm7361 | 12   | 6    | 10   | 13   | 13   | 14   | 9    | 13   | 12   | 23   | 38   | 24   | 14   | 15   | 9    | 5    | 8    | 17   | 2    | 4    | 8    | 25   | 14   | 14   | 21   | 13   | 5    | 11   | Gm7361 |        |
| Gm7489 | 0    | 0    | 0    | 0    | 0    | 0    | 0    | 0    | 0    | 0    | 0    | 0    | 0    | 0    | 3    | 0    | 0    | 3    | 0    | 0    | 0    | 0    | 0    | 0    | 0    | 0    | 0    | 2    | 1      | Gm7489 |
| Gm7579 | 0    | 0    | 0    | 0    | 0    | 1    | 0    | 0    | 0    | 0    | 2    | 0    | 0    | 0    | 0    | 0    | 2    | 0    | 0    | 0    | 0    | 0    | 0    | 0    | 0    | 0    | 0    | 0    | Gm7579 |        |
| Gm7582 | 0    | 0    | 0    | 0    | 0    | 0    | 0    | 2    | 0    | 0    | 0    | 0    | 0    | 0    | 0    | 1    | 0    | 0    | 0    | 0    | 0    | 0    | 0    | 0    | 0    | 0    | 0    | 0    | Gm7582 |        |
| Gm7592 | 0    | 0    | 0    | 0    | 0    | 0    | 0    | 0    | 1    | 0    | 0    | 2    | 1    | 0    | 0    | 0    | 0    | 0    | 0    | 0    | 0    | 2    | 0    | 1    | 0    | 0    | 0    | 0    | Gm7592 |        |
| Gm7609 | 0    | 0    | 0    | 0    | 0    | 0    | 0    | 0    | 0    | 0    | 0    | 0    | 0    | 1    | 0    | 0    | 0    | 0    | 0    | 0    | 0    | 0    | 0    | 0    | 0    | 0    | 1    | 0    | Gm7609 |        |
| Gm7694 | 930  | 1164 | 1379 | 1333 | 1224 | 1199 | 1428 | 604  | 757  | 790  | 843  | 904  | 939  | 1013 | 1027 | 1089 | 1264 | 1357 |      |      |      |      |      |      |      |      |      |      |        |        |



|        |      |      |      |      |      |      |      |      |      |      |      |      |      |      |      |      |      |      |      |      |      |      |      |      |      |      |      |      |        |        |
|--------|------|------|------|------|------|------|------|------|------|------|------|------|------|------|------|------|------|------|------|------|------|------|------|------|------|------|------|------|--------|--------|
| Gm8206 | 60   | 30   | 42   | 43   | 46   | 63   | 51   | 82   | 93   | 134  | 116  | 70   | 81   | 106  | 58   | 68   | 54   | 56   | 41   | 46   | 33   | 135  | 104  | 109  | 90   | 71   | 84   | 81   | Gm8206 |        |
| Gm8220 | 0    | 0    | 0    | 0    | 0    | 0    | 1    | 0    | 3    | 0    | 0    | 0    | 0    | 0    | 0    | 0    | 0    | 0    | 0    | 0    | 0    | 0    | 0    | 0    | 1    | 0    | 0    | 0    | 0      | Gm8220 |
| Gm8229 | 0    | 0    | 0    | 0    | 2    | 0    | 0    | 0    | 1    | 3    | 7    | 0    | 0    | 0    | 0    | 0    | 0    | 0    | 0    | 0    | 0    | 0    | 0    | 0    | 0    | 0    | 0    | 0    | 0      | Gm8229 |
| Gm8232 | 0    | 0    | 0    | 0    | 2    | 0    | 0    | 1    | 0    | 1    | 0    | 0    | 0    | 0    | 3    | 1    | 1    | 0    | 2    | 0    | 0    | 0    | 2    | 0    | 0    | 0    | 0    | 0    | 1      | Gm8232 |
| Gm8237 | 20   | 18   | 21   | 20   | 33   | 18   | 23   | 12   | 28   | 37   | 24   | 30   | 18   | 18   | 5    | 9    | 24   | 11   | 14   | 26   | 30   | 30   | 14   | 10   | 13   | 15   | 12   | 12   | Gm8237 |        |
| Gm8247 | 0    | 0    | 0    | 1    | 1    | 1    | 0    | 0    | 0    | 0    | 0    | 0    | 0    | 0    | 3    | 0    | 0    | 0    | 0    | 0    | 0    | 0    | 6    | 0    | 3    | 0    | 0    | 0    | Gm8247 |        |
| Gm8251 | 1220 | 995  | 355  | 654  | 530  | 676  | 731  | 260  | 183  | 128  | 101  | 150  | 166  | 147  | 1311 | 1089 | 553  | 722  | 596  | 1043 | 761  | 75   | 179  | 109  | 132  | 67   | 189  | 133  | Gm8251 |        |
| Gm826  | 3    | 5    | 6    | 1    | 2    | 2    | 2    | 9    | 4    | 5    | 6    | 3    | 3    | 6    | 4    | 8    | 19   | 9    | 5    | 4    | 6    | 3    | 13   | 6    | 6    | 0    | 6    | 5    | Gm826  |        |
| Gm8265 | 0    | 1    | 0    | 0    | 0    | 0    | 0    | 0    | 0    | 0    | 0    | 0    | 0    | 0    | 0    | 0    | 0    | 0    | 0    | 0    | 0    | 0    | 1    | 0    | 0    | 0    | 0    | 0    | Gm8265 |        |
| Gm8267 | 0    | 0    | 0    | 0    | 0    | 0    | 0    | 0    | 0    | 0    | 0    | 0    | 0    | 0    | 0    | 0    | 0    | 0    | 0    | 0    | 0    | 0    | 0    | 0    | 0    | 0    | 1    | 0    | Gm8267 |        |
| Gm8271 | 0    | 0    | 0    | 0    | 0    | 0    | 0    | 0    | 0    | 0    | 0    | 0    | 0    | 1    | 0    | 0    | 0    | 0    | 2    | 0    | 0    | 2    | 0    | 0    | 0    | 0    | 0    | 0    | Gm8271 |        |
| Gm8279 | 0    | 0    | 0    | 1    | 0    | 0    | 0    | 0    | 1    | 0    | 0    | 0    | 0    | 3    | 1    | 0    | 0    | 0    | 3    | 2    | 0    | 0    | 0    | 1    | 0    | 1    | 0    | 0    | Gm8279 |        |
| Gm8281 | 136  | 111  | 179  | 143  | 219  | 195  | 210  | 618  | 472  | 523  | 406  | 493  | 491  | 528  | 154  | 140  | 167  | 167  | 243  | 221  | 220  | 698  | 468  | 385  | 521  | 455  | 497  | 523  | Gm8281 |        |
| Gm8297 | 0    | 0    | 0    | 0    | 1    | 0    | 0    | 0    | 0    | 0    | 0    | 0    | 0    | 0    | 0    | 0    | 0    | 0    | 0    | 0    | 0    | 0    | 0    | 0    | 0    | 0    | 0    | 0    | Gm8297 |        |
| Gm8356 | 0    | 0    | 0    | 0    | 0    | 0    | 0    | 0    | 0    | 0    | 0    | 0    | 0    | 0    | 0    | 1    | 0    | 0    | 0    | 0    | 0    | 2    | 0    | 0    | 0    | 0    | 0    | 0    | Gm8356 |        |
| Gm8362 | 0    | 0    | 0    | 0    | 0    | 0    | 0    | 0    | 0    | 0    | 0    | 1    | 0    | 0    | 0    | 0    | 0    | 0    | 0    | 0    | 0    | 0    | 0    | 0    | 0    | 0    | 0    | 0    | Gm8362 |        |
| Gm8369 | 0    | 0    | 0    | 0    | 1    | 0    | 0    | 0    | 2    | 0    | 2    | 0    | 3    | 0    | 0    | 2    | 2    | 0    | 0    | 1    | 0    | 2    | 1    | 7    | 3    | 1    | 1    | 1    | Gm8369 |        |
| Gm8374 | 0    | 1    | 3    | 1    | 0    | 0    | 0    | 0    | 4    | 0    | 0    | 0    | 1    | 0    | 1    | 4    | 0    | 1    | 0    | 3    | 0    | 0    | 3    | 1    | 0    | 0    | 0    | 0    | Gm8374 |        |
| Gm8439 | 0    | 0    | 0    | 0    | 0    | 0    | 0    | 0    | 0    | 0    | 0    | 0    | 1    | 0    | 0    | 0    | 0    | 0    | 0    | 0    | 3    | 0    | 0    | 0    | 0    | 0    | 0    | 0    | Gm8439 |        |
| Gm867  | 22   | 37   | 44   | 21   | 41   | 32   | 7    | 34   | 36   | 27   | 35   | 27   | 83   | 32   | 42   | 44   | 38   | 13   | 9    | 14   | 12   | 47   | 56   | 18   | 23   | 26   | 57   | 77   | Gm867  |        |
| Gm8773 | 116  | 106  | 113  | 94   | 105  | 103  | 101  | 211  | 218  | 204  | 188  | 200  | 206  | 178  | 153  | 104  | 108  | 88   | 82   | 138  | 102  | 190  | 221  | 191  | 157  | 195  | 180  | 223  | Gm8773 |        |
| Gm8797 | 316  | 333  | 245  | 246  | 300  | 433  | 184  | 308  | 352  | 247  | 298  | 345  | 387  | 134  | 268  | 380  | 256  | 286  | 352  | 445  | 189  | 329  | 339  | 272  | 298  | 369  | 358  | 206  | Gm8797 |        |
| Gm884  | 2    | 0    | 0    | 0    | 0    | 1    | 0    | 1    | 0    | 0    | 1    | 0    | 5    | 0    | 1    | 0    | 0    | 3    | 0    | 0    | 8    | 0    | 0    | 1    | 0    | 0    | 1    | 0    | Gm884  |        |
| Gm8879 | 0    | 0    | 0    | 0    | 3    | 0    | 0    | 0    | 0    | 0    | 0    | 0    | 0    | 0    | 0    | 0    | 0    | 0    | 0    | 0    | 0    | 0    | 0    | 0    | 0    | 0    | 0    | 0    | Gm8879 |        |
| Gm8890 | 0    | 0    | 0    | 0    | 0    | 0    | 0    | 0    | 2    | 2    | 2    | 0    | 0    | 0    | 1    | 0    | 0    | 0    | 0    | 0    | 0    | 0    | 0    | 0    | 0    | 0    | 0    | 0    | Gm8890 |        |
| Gm8909 | 3    | 4    | 11   | 0    | 2    | 2    | 0    | 0    | 2    | 0    | 0    | 0    | 3    | 0    | 9    | 9    | 0    | 3    | 1    | 0    | 0    | 0    | 1    | 2    | 0    | 0    | 0    | 1    | Gm8909 |        |
| Gm8947 | 0    | 6    | 0    | 0    | 0    | 0    | 0    | 0    | 2    | 0    | 0    | 1    | 10   | 2    | 0    | 0    | 0    | 0    | 0    | 0    | 0    | 0    | 0    | 0    | 0    | 0    | 0    | 0    | 7      | Gm8947 |
| Gm9    | 0    | 0    | 0    | 0    | 0    | 0    | 0    | 0    | 0    | 0    | 0    | 1    | 0    | 0    | 0    | 2    | 0    | 0    | 0    | 0    | 0    | 0    | 0    | 2    | 0    | 0    | 0    | 0    | Gm9    |        |
| Gm9008 | 3    | 2    | 1    | 1    | 2    | 1    | 1    | 0    | 2    | 0    | 1    | 1    | 5    | 1    | 4    | 2    | 6    | 0    | 3    | 3    | 2    | 3    | 1    | 4    | 0    | 1    | 3    | 4    | Gm9008 |        |
| Gm9040 | 0    | 0    | 1    | 1    | 0    | 4    | 0    | 0    | 1    | 2    | 0    | 1    | 1    | 1    | 0    | 0    | 0    | 0    | 2    | 0    | 4    | 2    | 1    | 0    | 0    | 1    | 1    | 0    | Gm9040 |        |
| Gm9046 | 2    | 4    | 4    | 0    | 2    | 1    | 3    | 4    | 1    | 1    | 3    | 0    | 2    | 6    | 4    | 0    | 5    | 1    | 6    | 1    | 4    | 0    | 3    | 7    | 3    | 5    | 0    | 2    | Gm9046 |        |
| Gm9048 | 6    | 1    | 0    | 2    | 1    | 2    | 0    | 1    | 1    | 0    | 0    | 5    | 1    | 0    | 1    | 1    | 3    | 1    | 0    | 1    | 0    | 3    | 0    | 4    | 1    | 0    | 0    | 0    | Gm9048 |        |
| Gm9049 | 0    | 0    | 0    | 0    | 0    | 0    | 0    | 0    | 0    | 0    | 0    | 0    | 1    | 0    | 0    | 1    | 0    | 0    | 1    | 0    | 0    | 0    | 0    | 0    | 0    | 0    | 0    | 0    | Gm9049 |        |
| Gm9112 | 0    | 0    | 0    | 0    | 0    | 0    | 0    | 0    | 2    | 0    | 0    | 0    | 0    | 0    | 0    | 0    | 0    | 0    | 0    | 0    | 0    | 0    | 0    | 0    | 0    | 0    | 0    | 0    | Gm9112 |        |
| Gm9195 | 1    | 0    | 0    | 0    | 0    | 0    | 0    | 1    | 2    | 0    | 0    | 1    | 0    | 0    | 1    | 0    | 0    | 0    | 0    | 0    | 0    | 3    | 1    | 0    | 0    | 0    | 0    | 0    | Gm9195 |        |
| Gm9376 | 2    | 2    | 0    | 2    | 0    | 5    | 3    | 1    | 2    | 3    | 0    | 2    | 1    | 1    | 3    | 2    | 5    | 4    | 1    | 4    | 0    | 0    | 3    | 4    | 0    | 3    | 1    | 0    | Gm9376 |        |
| Gm9495 | 7    | 10   | 0    | 13   | 3    | 8    | 6    | 1    | 1    | 4    | 1    | 8    | 1    | 4    | 9    | 5    | 2    | 11   | 2    | 2    | 4    | 10   | 4    | 4    | 1    | 3    | 3    | 2    | Gm9495 |        |
| Gm9507 | 0    | 0    | 0    | 0    | 0    | 0    | 0    | 0    | 0    | 0    | 4    | 0    | 0    | 0    | 0    | 0    | 0    | 0    | 0    | 0    | 0    | 0    | 0    | 0    | 0    | 0    | 0    | 0    | Gm9507 |        |
| Gm960  | 344  | 344  | 196  | 462  | 416  | 430  | 505  | 134  | 118  | 133  | 145  | 99   | 81   | 115  | 313  | 362  | 285  | 464  | 371  | 430  | 448  | 170  | 135  | 119  | 217  | 96   | 62   | 55   | Gm960  |        |
| Gm9602 | 0    | 0    | 0    | 0    | 0    | 0    | 0    | 4    | 0    | 0    | 0    | 4    | 0    | 1    | 0    | 1    | 1    | 0    | 1    | 0    | 0    | 0    | 1    | 1    | 5    | 2    | 1    | 0    | Gm9602 |        |
| Gm9603 | 1    | 0    | 0    | 0    | 0    | 0    | 1    | 1    | 3    | 5    | 0    | 8    | 2    | 1    | 1    | 2    | 1    | 0    | 0    | 0    | 2    | 8    | 5    | 1    | 0    | 0    | 0    | 1    | Gm9603 |        |
| Gm973  | 65   | 112  | 83   | 69   | 101  | 83   | 65   | 212  | 191  | 170  | 157  | 211  | 237  | 142  | 136  | 136  | 94   | 101  | 82   | 117  | 71   | 256  | 256  | 116  | 183  | 93   | 189  | 177  | Gm973  |        |
| Gm9732 | 1    | 0    | 0    | 0    | 0    | 0    | 1    | 0    | 2    | 1    | 4    | 0    | 3    | 0    | 0    | 0    | 0    | 0    | 1    | 0    | 0    | 2    | 4    | 7    | 2    | 1    | 0    | 8    | Gm9732 |        |
| Gm9733 | 0    | 0    | 0    | 0    | 0    | 0    | 0    | 0    | 0    | 0    | 1    | 0    | 0    | 0    | 0    | 0    | 0    | 0    | 0    | 0    | 0    | 0    | 0    | 1    | 0    | 0    | 0    | 0    | Gm9733 |        |
| Gm9736 | 0    | 1    | 0    | 0    | 0    | 0    | 0    | 0    | 0    | 0    | 0    | 0    | 0    | 0    | 0    | 0    | 0    | 0    | 0    | 0    | 0    | 0    | 0    | 0    | 0    | 0    | 0    | 0    | Gm9736 |        |
| Gm9745 | 1    | 1    | 0    | 3    | 2    | 3    | 1    | 0    | 1    | 3    | 3    | 1    | 0    | 0    | 0    | 3    | 0    | 2    | 0    | 6    | 2    | 0    | 2    | 3    | 1    | 0    | 0    | 0    | Gm9745 |        |
| Gm9747 | 0    | 2    | 5    | 0    | 0    | 1    | 0    | 1    | 0    | 1    | 1    | 2    | 2    | 2    | 0    | 0    | 2    | 3    | 2    | 1    | 3    | 2    | 0    | 0    | 3    | 4    | 1    | 2    | Gm9747 |        |
| Gm9774 | 211  | 157  | 137  | 132  | 138  | 129  | 110  | 155  | 122  | 120  | 125  | 155  | 130  | 98   | 156  | 185  | 176  | 150  | 177  | 108  | 113  | 170  | 129  | 144  | 131  | 183  | 151  | 115  | Gm9774 |        |
| Gm9803 | 69   | 48   | 76   | 52   | 36   | 69   | 32   | 39   | 49   | 50   | 49   | 40   | 92   | 42   | 57   | 33   | 54   | 40   | 58   | 58   | 40   | 42   | 43   | 47   | 84   | 33   | 43   | 52   | Gm9803 |        |
| Gm9833 | 2278 | 1961 | 2315 | 2036 | 2316 | 2098 | 2580 | 4014 | 2960 | 2817 | 2653 | 3602 | 2982 | 4078 | 2586 | 2026 | 2208 | 2116 | 2314 | 2661 | 2463 | 3222 | 2845 | 3347 | 3389 | 3180 | 3711 | 3653 | Gm9833 |        |
| Gm9844 | 1451 | 1615 | 2295 | 2172 | 1845 | 1447 | 1352 | 1761 | 1424 | 3077 | 2077 | 2015 | 1588 | 1881 | 1457 | 1073 | 2226 | 1968 | 1887 | 1646 | 1809 | 1873 | 1553 | 3046 | 2466 | 1927 | 1689 | 1724 | Gm9844 |        |
| Gm9903 | 50   | 41   | 40   | 24   | 30   | 24   | 34   | 28   | 40   | 14   | 29   | 37   | 51   | 33   | 44   | 27   | 51   | 25   | 19   | 32   | 29   | 12   | 26   | 25   | 35   | 44   | 14   | 43   | Gm9903 |        |
| Gm9918 | 137  | 62   | 80   | 69   | 11   | 49   | 27   | 64   | 59   | 38   | 66   | 50   | 56   | 40   | 69   | 100  | 64   | 62   | 23   | 23   | 14   | 30   | 93   | 56   | 31   | 57   | 28   | 40   | Gm9918 |        |
| Gm9925 | 10   | 22   | 17   | 24   | 17   | 15   | 13   | 5    | 7    | 13   | 16   | 7    | 5    | 3    | 13   | 12   | 17   | 22   | 8    | 8    | 13   | 3    | 6    | 11   | 7    | 5    | 5    | 6    | Gm9925 |        |
| Gm9955 | 5    | 5    | 0    | 3    | 5    | 1    | 4    | 1    | 1    | 0    | 3    | 2    | 5    | 3    | 0    | 1    | 7    | 1    | 0    | 1    | 4    | 0    | 3    | 4    | 1    | 4    | 3    | 5    | Gm9955 |        |
| Gm9999 | 0    | 0    | 0    | 3    | 0    | 0    | 0    | 0    | 0    | 0    | 0    | 2    | 1    | 0    | 0    | 1    | 0    | 0    | 0    | 0    | 0    | 2    | 1    | 0    | 0    | 0    | 0    | 1    | Gm9999 |        |
| Gmc1   | 5357 | 4119 | 4520 | 4939 | 4943 | 4873 | 5160 | 4942 | 4335 | 4520 | 4416 | 4573 | 4636 | 4677 | 4990 | 4741 | 4692 | 4908 | 4462 | 4341 | 4832 | 4752 | 4075 | 4516 | 4793 | 4911 | 4860 | 4555 | Gmc1   |        |
| Gmds   | 1336 | 1196 | 1300 | 930  | 969  | 914  | 893  | 1125 | 1263 | 1213 | 1164 | 1044 | 1182 | 1133 | 1284 | 1572 | 1102 | 1010 | 838  | 914  | 767  | 1228 | 1394 | 1228 | 1166 | 1431 | 1076 | 1159 | Gmds   |        |
| Gmeb1  | 2668 | 2598 | 2866 | 2846 | 3035 | 3122 | 3087 | 5083 | 4416 | 5127 | 4529 | 5525 | 5204 | 5330 | 2619 | 2523 | 3038 | 2682 | 3225 | 2835 | 2918 | 5257 | 4391 | 5130 | 5126 | 5149 | 5516 | 5    |        |        |

|         |       |       |       |       |       |       |       |       |       |       |       |       |       |       |       |       |       |       |       |       |       |       |       |       |       |       |       |        |         |
|---------|-------|-------|-------|-------|-------|-------|-------|-------|-------|-------|-------|-------|-------|-------|-------|-------|-------|-------|-------|-------|-------|-------|-------|-------|-------|-------|-------|--------|---------|
| Gnai3   | 27580 | 21648 | 23961 | 20754 | 19085 | 20611 | 21558 | 21002 | 17694 | 15491 | 16081 | 18317 | 18451 | 18194 | 28247 | 25351 | 22198 | 21529 | 19042 | 24143 | 19587 | 16954 | 17958 | 16512 | 16693 | 19955 | 19314 | 18924  | Gnai3   |
| Gnal    | 1962  | 1837  | 1851  | 2418  | 4149  | 3017  | 2875  | 2836  | 2790  | 3295  | 2993  | 1954  | 2415  | 1877  | 2159  | 2063  | 2231  | 2874  | 2944  | 2542  | 3337  | 4761  | 2616  | 2137  | 3225  | 1033  | 1691  | 1640   | Gnal    |
| Gnao1   | 18062 | 22811 | 24148 | 34980 | 40362 | 33315 | 34576 | 24748 | 26332 | 35370 | 26864 | 33406 | 25848 | 29345 | 19453 | 17383 | 32615 | 36783 | 40865 | 37323 | 37090 | 37034 | 22641 | 34397 | 38224 | 22714 | 26115 | 25560  | Gnao1   |
| Gnaq    | 10763 | 9541  | 11162 | 14462 | 16975 | 15461 | 16201 | 18362 | 16222 | 18695 | 18330 | 17713 | 17243 | 18644 | 11699 | 9332  | 12880 | 14281 | 15489 | 13873 | 16491 | 23021 | 15731 | 19134 | 21824 | 14901 | 17249 | 17683  | Gnaq    |
| Gnas    | 52319 | 58703 | 60389 | 59368 | 62202 | 55561 | 53922 | 54694 | 63811 | 70014 | 79969 | 66206 | 63578 | 65319 | 56305 | 54869 | 61190 | 60445 | 58522 | 47764 | 56590 | 65079 | 72352 | 69154 | 64698 | 70226 | 66788 | 63973  | Gnas    |
| Gnat1   | 40    | 68    | 63    | 99    | 63    | 49    | 51    | 11    | 13    | 12    | 13    | 11    | 14    | 6     | 36    | 75    | 52    | 95    | 70    | 69    | 7     | 9     | 12    | 9     | 12    | 14    | 5     | Gnat1  |         |
| Gnat2   | 27    | 29    | 17    | 20    | 14    | 14    | 11    | 11    | 14    | 24    | 11    | 17    | 16    | 26    | 24    | 30    | 25    | 20    | 12    | 24    | 12    | 28    | 23    | 10    | 6     | 13    | 22    | 17     | Gnat2   |
| Gnat3   | 25    | 28    | 27    | 15    | 5     | 5     | 8     | 26    | 12    | 8     | 12    | 18    | 69    | 13    | 82    | 30    | 25    | 6     | 6     | 12    | 8     | 8     | 10    | 6     | 9     | 11    | 14    | 28     | Gnat3   |
| Gnaz    | 1524  | 2117  | 2071  | 2752  | 3062  | 2685  | 2554  | 1402  | 1408  | 1685  | 1618  | 1308  | 1353  | 1292  | 1857  | 1834  | 2520  | 2787  | 2995  | 2560  | 2822  | 1861  | 1393  | 1611  | 1918  | 1268  | 1247  | 1244   | Gnaz    |
| Gnb1    | 38749 | 36695 | 41031 | 44188 | 48339 | 43793 | 50342 | 49272 | 46366 | 52403 | 46588 | 55236 | 48109 | 56392 | 40368 | 35181 | 44002 | 44721 | 47991 | 43181 | 49815 | 57383 | 45831 | 54022 | 56231 | 55648 | 51125 | 56703  | Gnb1    |
| Gnb2    | 632   | 651   | 514   | 684   | 598   | 531   | 542   | 377   | 402   | 415   | 379   | 386   | 342   | 346   | 533   | 607   | 555   | 602   | 602   | 570   | 668   | 363   | 400   | 335   | 395   | 412   | 310   | 370    | Gnb2    |
| Gnb3    | 8429  | 11501 | 11153 | 12165 | 11915 | 10598 | 9983  | 10690 | 12935 | 14372 | 12486 | 14403 | 12281 | 12306 | 8327  | 9502  | 12228 | 11592 | 13231 | 10158 | 10932 | 13085 | 13736 | 14551 | 14233 | 15279 | 12605 | 12251  | Gnb3    |
| Gnb4    | 81    | 98    | 104   | 113   | 133   | 106   | 70    | 85    | 93    | 82    | 96    | 127   | 162   | 134   | 87    | 120   | 88    | 113   | 140   | 93    | 108   | 139   | 125   | 127   | 74    | 40    | 194   | 148    | Gnb4    |
| Gnb5    | 5009  | 4438  | 4042  | 3829  | 4734  | 4750  | 4074  | 3991  | 4179  | 3569  | 4395  | 3057  | 3381  | 2957  | 5178  | 5256  | 3823  | 4418  | 3940  | 4512  | 4116  | 4132  | 4295  | 2932  | 3558  | 2769  | 3133  | 2892   | Gnb5    |
| Gne     | 3656  | 4101  | 3653  | 4147  | 3945  | 3716  | 4186  | 1865  | 2033  | 1841  | 1709  | 1700  | 1750  | 1736  | 3792  | 3851  | 3653  | 3736  | 3808  | 4024  | 4116  | 1998  | 1956  | 1749  | 1928  | 1758  | 1672  | 1831   | Gne     |
| Gng10   | 2125  | 2515  | 1685  | 2084  | 2446  | 2100  | 1968  | 1850  | 2001  | 1831  | 1934  | 1521  | 1682  | 1561  | 2289  | 2354  | 2082  | 2196  | 2212  | 2176  | 2166  | 1952  | 1994  | 1661  | 1854  | 1581  | 1482  | 1515   | Gng10   |
| Gng11   | 9     | 16    | 21    | 16    | 23    | 32    | 19    | 43    | 34    | 56    | 33    | 26    | 29    | 45    | 21    | 13    | 29    | 23    | 19    | 17    | 35    | 28    | 30    | 35    | 28    | 20    | 22    | 31     | Gng11   |
| Gng12   | 592   | 498   | 638   | 456   | 461   | 433   | 520   | 907   | 976   | 781   | 1021  | 754   | 922   | 918   | 550   | 528   | 461   | 421   | 391   | 572   | 477   | 775   | 1074  | 880   | 755   | 1006  | 780   | 981    | Gng12   |
| Gng13   | 6613  | 5174  | 5480  | 4306  | 4471  | 4635  | 4569  | 2898  | 3132  | 2655  | 3477  | 2573  | 2848  | 2753  | 6349  | 6277  | 4818  | 4710  | 4057  | 4205  | 4276  | 2856  | 3609  | 2468  | 2462  | 2647  | 2791  | 2848   | Gng13   |
| Gng2    | 10    | 13    | 7     | 9     | 10    | 1     | 3     | 34    | 24    | 23    | 40    | 3     | 9     | 18    | 4     | 6     | 2     | 1     | 3     | 0     | 3     | 7     | 21    | 65    | 5     | 24    | 5     | 11     | Gng2    |
| Gng3    | 16399 | 14524 | 15566 | 19944 | 26989 | 25519 | 27079 | 33729 | 29171 | 30401 | 26280 | 27542 | 25196 | 29793 | 20508 | 14850 | 17544 | 22341 | 24511 | 27260 | 27302 | 39495 | 28400 | 29813 | 36683 | 25195 | 26117 | 26892  | Gng3    |
| Gng4    | 3805  | 5496  | 4178  | 5641  | 7072  | 6044  | 6622  | 6703  | 6557  | 6810  | 6130  | 6246  | 6254  | 7167  | 4948  | 3908  | 5501  | 5504  | 6405  | 6802  | 7023  | 7498  | 5675  | 6539  | 7760  | 5128  | 6269  | 6680   | Gng4    |
| Gng5    | 908   | 759   | 525   | 1004  | 1654  | 1251  | 1398  | 821   | 966   | 891   | 748   | 484   | 474   | 436   | 835   | 653   | 1085  | 1265  | 1319  | 1180  | 1360  | 1243  | 845   | 632   | 937   | 328   | 310   | 330    | Gng5    |
| Gng6    | 4234  | 4616  | 4679  | 4134  | 3343  | 3400  | 5175  | 3638  | 3512  | 3426  | 3672  | 4050  | 4568  | 5776  | 4077  | 3785  | 4392  | 3629  | 3914  | 4411  | 4646  | 2801  | 3604  | 3809  | 3513  | 3329  | 4822  | 6093   | Gng6    |
| Gng7    | 1242  | 1508  | 1380  | 1669  | 1757  | 1465  | 1562  | 777   | 1037  | 1040  | 949   | 895   | 843   | 925   | 1338  | 1434  | 1690  | 2015  | 1873  | 1428  | 1646  | 1074  | 933   | 1058  | 1167  | 1126  | 721   | 894    | Gng7    |
| Gng8    | 610   | 688   | 590   | 727   | 416   | 580   | 491   | 492   | 399   | 507   | 542   | 422   | 644   | 501   | 549   | 743   | 691   | 643   | 520   | 445   | 458   | 374   | 439   | 660   | 465   | 677   | 449   | 456    | Gng8    |
| Gngt1   | 1     | 2     | 0     | 0     | 0     | 0     | 0     | 0     | 2     | 0     | 0     | 0     | 0     | 0     | 0     | 0     | 0     | 0     | 0     | 0     | 0     | 1     | 0     | 0     | 0     | 0     | 0     | 0      | Gngt1   |
| Gngt2   | 66    | 49    | 82    | 39    | 56    | 38    | 41    | 61    | 91    | 96    | 118   | 52    | 84    | 82    | 78    | 79    | 48    | 56    | 34    | 54    | 47    | 75    | 107   | 85    | 63    | 90    | 62    | 95     | Gngt2   |
| Gnl1    | 4909  | 5955  | 7275  | 7235  | 6407  | 5674  | 5481  | 2822  | 3677  | 4017  | 4284  | 4297  | 3652  | 3974  | 4416  | 5495  | 7470  | 7112  | 6876  | 4671  | 5920  | 3766  | 3600  | 4506  | 4128  | 5037  | 3842  | 4018   | Gnl1    |
| Gnl2    | 7560  | 7525  | 7046  | 6523  | 5919  | 6272  | 6609  | 6786  | 6021  | 6054  | 6001  | 6050  | 5865  | 6383  | 7369  | 7072  | 6678  | 6418  | 6092  | 7177  | 6462  | 6158  | 5897  | 5973  | 5976  | 6505  | 6331  | 6457   | Gnl2    |
| Gnl3    | 5117  | 4606  | 4849  | 4550  | 3466  | 3954  | 4356  | 5305  | 4058  | 4244  | 4708  | 5407  | 5095  | 5710  | 5097  | 4700  | 4175  | 4012  | 3530  | 4684  | 3887  | 4495  | 4581  | 5053  | 4479  | 6247  | 5297  | 6086   | Gnl3    |
| Gnl3l   | 8809  | 9622  | 8690  | 10553 | 11810 | 11277 | 12170 | 12732 | 10977 | 11384 | 10662 | 10981 | 10819 | 11630 | 10183 | 7935  | 9815  | 10641 | 11366 | 11906 | 12112 | 12607 | 10947 | 11182 | 12741 | 9001  | 10793 | 11070  | Gnl3l   |
| Gnmt    | 182   | 254   | 192   | 303   | 200   | 261   | 220   | 50    | 55    | 76    | 44    | 67    | 44    | 44    | 175   | 206   | 211   | 285   | 259   | 207   | 232   | 75    | 35    | 59    | 48    | 59    | 56    | 50     | Gnmt    |
| Gnpat   | 7161  | 7570  | 6946  | 6003  | 5715  | 5805  | 6182  | 7636  | 7481  | 6901  | 6839  | 8486  | 8011  | 8318  | 7023  | 6238  | 6531  | 5706  | 6394  | 6435  | 6235  | 6891  | 7102  | 7319  | 7470  | 8565  | 8548  | 8812   | Gnpat   |
| Gnpda1  | 1540  | 1573  | 1563  | 1462  | 1317  | 1312  | 1360  | 1159  | 1342  | 1256  | 1307  | 1456  | 1355  | 1411  | 1625  | 1595  | 1548  | 1354  | 1334  | 1480  | 1317  | 1285  | 1470  | 1244  | 1176  | 1605  | 1419  | 1318   | Gnpda1  |
| Gnpda2  | 2610  | 1183  | 1378  | 1569  | 1500  | 1535  | 1577  | 2159  | 1812  | 1607  | 1585  | 1502  | 1678  | 1625  | 1751  | 1544  | 1401  | 1479  | 1456  | 1819  | 1533  | 1683  | 1983  | 1557  | 1539  | 1755  | 1733  | 1650   | Gnpda2  |
| Gnpnat1 | 1307  | 1157  | 2044  | 1573  | 1432  | 1681  | 1748  | 1817  | 1742  | 1562  | 1607  | 1493  | 1691  | 1611  | 2244  | 2254  | 1654  | 1562  | 1397  | 1789  | 1569  | 1686  | 1909  | 1414  | 1437  | 1508  | 1614  | 1735   | Gnpnat1 |
| Gnptab  | 4615  | 4454  | 3826  | 4890  | 6011  | 5574  | 5458  | 4103  | 4212  | 4530  | 4120  | 3541  | 3775  | 3574  | 4776  | 4586  | 4394  | 5080  | 5117  | 5094  | 5454  | 4672  | 4047  | 3819  | 4403  | 2914  | 3391  | 3509   | Gnptab  |
| Gnptg   | 2285  | 3002  | 2894  | 3237  | 2850  | 2860  | 2911  | 2326  | 2350  | 2922  | 2374  | 2843  | 2442  | 2819  | 2523  | 2444  | 3074  | 2979  | 3040  | 2887  | 2974  | 2558  | 2300  | 2694  | 2943  | 2575  | 2668  | 2763   | Gnptg   |
| Gnrh1   | 248   | 335   | 255   | 381   | 259   | 357   | 285   | 123   | 92    | 156   | 123   | 141   | 170   | 125   | 225   | 328   | 346   | 418   | 312   | 247   | 288   | 124   | 108   | 181   | 141   | 184   | 142   | 154    | Gnrh1   |
| Gns     | 10462 | 11545 | 10250 | 10488 | 8774  | 9367  | 8860  | 5245  | 6212  | 6180  | 6696  | 6076  | 6058  | 5464  | 9965  | 11993 | 10379 | 10549 | 8707  | 7725  | 8929  | 6358  | 6575  | 5704  | 5877  | 6199  | 5746  | 5574   | Gns     |
| Golga1  | 3237  | 3236  | 2766  | 3022  | 3400  | 3478  | 3521  | 5708  | 4966  | 4724  | 4524  | 5091  | 4814  | 4932  | 3666  | 3116  | 2947  | 2864  | 3286  | 3927  | 3441  | 5048  | 5018  | 4605  | 5015  | 4075  | 5029  | 4926   | Golga1  |
| Golga2  | 5499  | 6280  | 6302  | 6658  | 6465  | 6269  | 6056  | 5223  | 5927  | 6468  | 6452  | 6043  | 5695  | 6098  | 5327  | 5647  | 6652  | 6743  | 6553  | 5360  | 6235  | 6711  | 6002  | 6400  | 6508  | 5772  | 5872  | 5733   | Golga2  |
| Golga3  | 6647  | 7039  | 5195  | 6436  | 6268  | 6384  | 6383  | 6748  | 6923  | 6481  | 6865  | 6467  | 6073  | 6299  | 6442  | 6952  | 5490  | 6655  | 5752  | 6704  | 6635  | 6363  | 6408  | 6051  | 4690  | 6200  | 5929  | Golga3 |         |
| Golga4  | 16264 | 16980 | 12434 | 15234 | 15111 | 17046 | 16821 | 14801 | 14100 | 13022 | 13432 | 13399 | 12707 | 14250 | 16254 | 17263 | 14198 | 14860 | 14294 | 18044 | 16958 | 10881 | 13173 | 11810 | 13455 | 9211  | 13773 | 12155  | Golga4  |
| Golga5  | 3827  | 3730  | 3697  | 3450  | 3015  | 3126  | 3389  | 3230  | 2963  | 3028  | 3073  | 3028  | 2972  | 3307  | 3727  | 3475  | 3472  | 3361  | 3090  | 3244  | 3135  | 2906  | 3085  | 2988  | 3130  | 3214  | 3069  | 3063   | Golga5  |
| Golga7  | 8284  | 7914  | 9282  | 8473  | 7923  | 7872  | 8715  | 8841  | 8525  | 8125  | 7890  | 9146  | 8520  | 9327  | 8637  | 8881  | 8459  | 8156  | 8217  | 9215  | 8349  | 7511  | 8818  | 8536  | 8607  | 9628  | 9109  | 9202   | Golga7  |
| Golga7b | 315   |       |       |       |       |       |       |       |       |       |       |       |       |       |       |       |       |       |       |       |       |       |       |       |       |       |       |        |         |

|          |       |       |       |       |       |       |       |       |       |       |       |       |       |       |       |       |       |       |       |       |       |       |       |       |       |       |       |       |          |
|----------|-------|-------|-------|-------|-------|-------|-------|-------|-------|-------|-------|-------|-------|-------|-------|-------|-------|-------|-------|-------|-------|-------|-------|-------|-------|-------|-------|-------|----------|
| Gpat3    | 45    | 35    | 36    | 26    | 67    | 56    | 45    | 33    | 35    | 50    | 111   | 26    | 31    | 16    | 58    | 50    | 30    | 33    | 69    | 37    | 49    | 35    | 42    | 35    | 32    | 16    | 36    | 24    | Gpat3    |
| Gpat4    | 14239 | 14988 | 12949 | 13946 | 12493 | 13568 | 13134 | 10717 | 10560 | 10297 | 9955  | 11554 | 10685 | 10617 | 13519 | 13406 | 12964 | 13627 | 13512 | 12982 | 13229 | 10119 | 10082 | 10787 | 11234 | 11426 | 11622 | 11425 | Gpat4    |
| Gpatch1  | 2298  | 2429  | 2253  | 2309  | 2074  | 2095  | 2192  | 1628  | 1755  | 1911  | 1731  | 2021  | 1796  | 1881  | 2066  | 2228  | 2261  | 2114  | 2186  | 2134  | 2189  | 1726  | 1716  | 1923  | 1853  | 1883  | 1734  | 1761  | Gpatch1  |
| Gpatch11 | 2391  | 2579  | 2561  | 2714  | 2514  | 2363  | 2695  | 2282  | 2149  | 2233  | 2141  | 2144  | 2158  | 2266  | 2620  | 2464  | 2775  | 2852  | 2497  | 2922  | 2691  | 2020  | 2091  | 2283  | 2391  | 2150  | 2063  | 2231  | Gpatch11 |
| Gpatch2  | 3730  | 3657  | 3734  | 3675  | 3421  | 3450  | 3629  | 2917  | 2834  | 2856  | 2803  | 3413  | 3277  | 3477  | 3663  | 3473  | 3822  | 3449  | 3346  | 3319  | 3356  | 2804  | 2682  | 2905  | 3001  | 3049  | 3428  | 3450  | Gpatch2  |
| Gpatch2l | 3840  | 3866  | 3240  | 4135  | 3976  | 4206  | 4083  | 3604  | 3572  | 3642  | 3281  | 3368  | 3289  | 3419  | 4098  | 3503  | 3870  | 4156  | 4047  | 4013  | 4385  | 3790  | 3341  | 3282  | 3940  | 2841  | 3290  | 3312  | Gpatch2l |
| Gpatch3  | 339   | 414   | 510   | 329   | 503   | 420   | 407   | 410   | 462   | 489   | 480   | 638   | 545   | 566   | 336   | 324   | 423   | 401   | 441   | 374   | 393   | 446   | 471   | 543   | 520   | 607   | 603   | 555   | Gpatch3  |
| Gpatch4  | 1756  | 1837  | 2088  | 1830  | 1540  | 1619  | 1619  | 1873  | 1674  | 1911  | 1766  | 1897  | 1971  | 2257  | 1824  | 1703  | 1834  | 1632  | 1485  | 1699  | 1674  | 1601  | 1680  | 2019  | 1892  | 2638  | 1872  | 2381  | Gpatch4  |
| Gpatch8  | 9060  | 9087  | 9472  | 11173 | 11128 | 10567 | 10926 | 8905  | 9001  | 11395 | 10771 | 11516 | 10955 | 11441 | 8426  | 9054  | 10165 | 10914 | 10931 | 8434  | 11101 | 11670 | 8211  | 10910 | 11542 | 7963  | 10911 | 10890 | Gpatch8  |
| Gpbar1   | 0     | 0     | 0     | 0     | 1     | 0     | 1     | 0     | 5     | 0     | 0     | 0     | 2     | 1     | 0     | 2     | 0     | 0     | 1     | 3     | 5     | 0     | 3     | 0     | 1     | 2     | 2     | 1     | Gpbar1   |
| Gpbb1    | 10206 | 7664  | 9042  | 8935  | 8473  | 8359  | 10437 | 11313 | 9278  | 8716  | 8462  | 9633  | 8945  | 9815  | 11408 | 9168  | 8998  | 8702  | 8410  | 11078 | 9640  | 9254  | 9565  | 9340  | 9102  | 10239 | 9752  | 10268 | Gpbb1    |
| Gpbb1l1  | 6338  | 5347  | 5600  | 5380  | 4430  | 4843  | 5165  | 5683  | 4977  | 4656  | 5334  | 5387  | 5519  | 5862  | 5677  | 5666  | 5116  | 5432  | 4835  | 5071  | 5225  | 4906  | 4882  | 5121  | 5080  | 5707  | 5670  | 5616  | Gpbb1l1  |
| Gpc1     | 9164  | 10933 | 10639 | 10807 | 10126 | 9992  | 9020  | 10240 | 12084 | 13916 | 12340 | 16853 | 12328 | 14608 | 8036  | 8854  | 11466 | 10034 | 11252 | 8840  | 9096  | 11511 | 10222 | 15670 | 14361 | 19943 | 13544 | 14163 | Gpc1     |
| Gpc2     | 4905  | 5789  | 5782  | 6365  | 6176  | 5640  | 7353  | 5169  | 4520  | 5085  | 4547  | 4804  | 4526  | 5740  | 5028  | 4527  | 6731  | 6491  | 6624  | 4843  | 7211  | 6729  | 4057  | 5775  | 5643  | 4174  | 4718  | 5217  | Gpc2     |
| Gpc3     | 19075 | 14912 | 15247 | 8112  | 5105  | 8191  | 3736  | 10756 | 15242 | 10638 | 21582 | 9536  | 14341 | 9099  | 15347 | 21628 | 10138 | 9509  | 4114  | 5196  | 3699  | 11603 | 19572 | 10172 | 7892  | 11933 | 10793 | 10454 | Gpc3     |
| Gpc4     | 2419  | 2117  | 2205  | 2250  | 1829  | 2134  | 2302  | 2136  | 2739  | 2548  | 2586  | 3189  | 2232  | 3282  | 2019  | 1974  | 2167  | 2260  | 2251  | 1673  | 2250  | 1790  | 2361  | 3409  | 2490  | 3753  | 2511  | 2906  | Gpc4     |
| Gpc5     | 52    | 43    | 46    | 70    | 83    | 79    | 83    | 82    | 79    | 75    | 83    | 45    | 53    | 48    | 44    | 57    | 66    | 61    | 82    | 106   | 61    | 87    | 62    | 44    | 70    | 37    | 77    | 51    | Gpc5     |
| Gpc6     | 2985  | 2304  | 1413  | 1637  | 1368  | 1833  | 1279  | 1760  | 2338  | 1948  | 2781  | 1861  | 1953  | 1811  | 2012  | 2648  | 1415  | 1508  | 1260  | 1339  | 1272  | 1967  | 2355  | 1745  | 1677  | 1054  | 2066  | 1740  | Gpc6     |
| Gpcpd1   | 5157  | 3522  | 3551  | 4486  | 5177  | 5212  | 5830  | 7543  | 7374  | 7103  | 7221  | 6886  | 7395  | 7563  | 5631  | 4307  | 3969  | 4613  | 4437  | 5054  | 4844  | 7752  | 7308  | 6283  | 7092  | 5650  | 7004  | 7116  | Gpcpd1   |
| Gpd1     | 197   | 311   | 444   | 440   | 487   | 338   | 355   | 258   | 261   | 278   | 297   | 365   | 298   | 344   | 231   | 267   | 497   | 442   | 508   | 318   | 399   | 368   | 201   | 333   | 419   | 321   | 407   | 363   | Gpd1     |
| Gpd1l    | 4594  | 5202  | 4401  | 5015  | 5131  | 4620  | 5161  | 2939  | 2908  | 2780  | 2485  | 2391  | 2239  | 2356  | 4799  | 4537  | 4475  | 4987  | 5108  | 5018  | 5322  | 2971  | 2850  | 2592  | 2866  | 2161  | 2365  | 2376  | Gpd1l    |
| Gpd2     | 2936  | 2573  | 2482  | 2549  | 2646  | 2556  | 2921  | 2539  | 2577  | 2493  | 2262  | 2742  | 2563  | 2699  | 2931  | 2548  | 2540  | 2367  | 2706  | 2622  | 2600  | 2420  | 2357  | 2481  | 2302  | 2798  | 2511  | 2556  | Gpd2     |
| Gper1    | 68    | 93    | 69    | 65    | 167   | 96    | 118   | 162   | 225   | 228   | 219   | 146   | 163   | 180   | 54    | 76    | 46    | 109   | 145   | 142   | 125   | 224   | 258   | 194   | 277   | 165   | 163   | 133   | Gper1    |
| Gphb5    | 1     | 0     | 3     | 0     | 2     | 2     | 3     | 1     | 0     | 0     | 0     | 0     | 0     | 0     | 0     | 0     | 0     | 0     | 0     | 0     | 0     | 2     | 1     | 0     | 0     | 0     | 0     | 0     | Gphb5    |
| Gphn     | 3507  | 3436  | 3333  | 3648  | 4096  | 3608  | 4270  | 3932  | 3213  | 3284  | 3046  | 3289  | 3026  | 3215  | 3798  | 3113  | 3410  | 3744  | 4102  | 4315  | 4280  | 3928  | 3429  | 3199  | 3667  | 2883  | 3201  | 3277  | Gphn     |
| Gp1      | 20608 | 23266 | 18787 | 19856 | 19983 | 19940 | 17438 | 15610 | 18398 | 17670 | 18035 | 16544 | 16833 | 15976 | 19312 | 20269 | 20183 | 19891 | 20229 | 19225 | 18525 | 16046 | 18332 | 16859 | 16860 | 18743 | 16867 | 16896 | Gp1      |
| Gp1bpb1  | 8     | 4     | 6     | 0     | 14    | 6     | 0     | 22    | 39    | 27    | 72    | 14    | 14    | 5     | 15    | 9     | 1     | 14    | 9     | 0     | 0     | 28    | 8     | 18    | 9     | 20    | 19    | 8     | Gp1bpb1  |
| Gpkow    | 6666  | 6739  | 5732  | 6430  | 5911  | 6125  | 6439  | 5327  | 5145  | 4561  | 4439  | 4906  | 4848  | 4810  | 7009  | 5918  | 5691  | 6229  | 6010  | 6583  | 6351  | 4602  | 4827  | 4461  | 4642  | 4721  | 5032  | 4809  | Gpkow    |
| Gpld1    | 121   | 93    | 60    | 116   | 176   | 211   | 132   | 239   | 299   | 237   | 258   | 103   | 121   | 110   | 105   | 103   | 93    | 140   | 139   | 129   | 191   | 226   | 285   | 180   | 149   | 114   | 124   | 95    | Gpld1    |
| Gpm6a    | 15362 | 13239 | 13868 | 21182 | 29490 | 27634 | 32959 | 43542 | 32722 | 32157 | 26282 | 29174 | 19664 | 31859 | 20961 | 11749 | 18707 | 24930 | 29476 | 36774 | 33541 | 41906 | 33379 | 34208 | 42958 | 24595 | 27800 | 28401 | Gpm6a    |
| Gpm6b    | 15777 | 16169 | 15863 | 21761 | 26041 | 26256 | 28879 | 29145 | 23777 | 24892 | 21004 | 26256 | 21943 | 14743 | 20678 | 23205 | 25694 | 27739 | 27920 | 28022 | 22565 | 26142 | 30851 | 23716 | 25100 | 25100 | 25323 | Gpm6b |          |
| Gpn1     | 3720  | 3701  | 3101  | 3176  | 2953  | 2985  | 3408  | 3748  | 3690  | 3272  | 3298  | 3746  | 3522  | 3905  | 3518  | 3439  | 3257  | 3079  | 3222  | 3214  | 3193  | 3532  | 3492  | 3478  | 3535  | 3765  | 3439  | 4014  | Gpn1     |
| Gpn2     | 946   | 1216  | 980   | 953   | 732   | 800   | 767   | 735   | 725   | 628   | 630   | 800   | 792   | 756   | 927   | 1030  | 944   | 957   | 843   | 875   | 761   | 662   | 673   | 744   | 745   | 957   | 815   | 774   | Gpn2     |
| Gpn3     | 1787  | 1951  | 1973  | 2052  | 1564  | 1859  | 1623  | 1326  | 1371  | 1464  | 1457  | 1635  | 1516  | 1520  | 1623  | 1875  | 2034  | 1992  | 1855  | 1754  | 1605  | 1257  | 1382  | 1538  | 1437  | 1923  | 1691  | 1523  | Gpn3     |
| Gpnm6    | 45    | 39    | 26    | 13    | 7     | 39    | 9     | 50    | 85    | 43    | 60    | 51    | 40    | 23    | 17    | 40    | 8     | 32    | 9     | 2     | 5     | 30    | 84    | 47    | 22    | 38    | 24    | 28    | Gpnm6    |
| Gpr1     | 9     | 7     | 12    | 8     | 7     | 13    | 7     | 12    | 18    | 13    | 18    | 16    | 17    | 26    | 7     | 5     | 10    | 3     | 14    | 15    | 21    | 13    | 24    | 11    | 12    | 19    | 17    | 15    | Gpr1     |
| Gpr101   | 15    | 22    | 9     | 37    | 44    | 24    | 46    | 37    | 37    | 42    | 35    | 12    | 7     | 5     | 17    | 16    | 12    | 43    | 51    | 30    | 53    | 42    | 28    | 12    | 32    | 19    | 8     | 7     | Gpr101   |
| Gpr107   | 5063  | 5577  | 4887  | 5462  | 5314  | 5324  | 4766  | 5468  | 5564  | 5941  | 5788  | 6047  | 6026  | 5499  | 4932  | 5175  | 4920  | 5466  | 5635  | 4688  | 5198  | 5890  | 5602  | 5667  | 6169  | 5520  | 6057  | 5739  | Gpr107   |
| Gpr108   | 1183  | 1605  | 1597  | 1446  | 1296  | 1132  | 1093  | 1308  | 1439  | 1527  | 1540  | 1440  | 1356  | 1271  | 1241  | 1389  | 1542  | 1528  | 1312  | 1108  | 1189  | 1402  | 1564  | 1537  | 1446  | 1753  | 1432  | 1556  | Gpr108   |
| Gpr119   | 0     | 0     | 0     | 0     | 1     | 0     | 0     | 4     | 2     | 0     | 2     | 0     | 0     | 0     | 0     | 0     | 0     | 0     | 0     | 0     | 0     | 0     | 1     | 0     | 2     | 0     | 0     | 0     | Gpr119   |
| Gpr12    | 54    | 55    | 59    | 78    | 191   | 147   | 144   | 88    | 115   | 150   | 116   | 42    | 36    | 51    | 42    | 38    | 68    | 107   | 138   | 128   | 156   | 89    | 114   | 72    | 124   | 31    | 40    | 38    | Gpr12    |
| Gpr132   | 3     | 3     | 6     | 3     | 2     | 2     | 2     | 7     | 7     | 7     | 4     | 1     | 0     | 1     | 3     | 10    | 0     | 4     | 2     | 0     | 0     | 0     | 3     | 2     | 3     | 6     | 0     | 5     | Gpr132   |
| Gpr135   | 499   | 384   | 590   | 486   | 652   | 534   | 645   | 372   | 338   | 312   | 384   | 272   | 354   | 315   | 539   | 534   | 556   | 541   | 672   | 596   | 599   | 429   | 313   | 413   | 398   | 230   | 268   | 275   | Gpr135   |
| Gpr137   | 1752  | 2558  | 2035  | 2448  | 2341  | 2206  | 2099  | 1601  | 2028  | 1976  | 1929  | 1934  | 1837  | 1658  | 1849  | 2022  | 2217  | 2363  | 2632  | 2317  | 2229  | 2019  | 2043  | 1920  | 2016  | 1908  | 1696  | 1740  | Gpr137   |
| Gpr137b  | 2019  | 1950  | 1697  | 2085  | 2227  | 2138  | 2135  | 1812  | 1648  | 1799  | 1590  | 1969  | 1777  | 2024  | 2132  | 1901  | 1838  | 1983  | 1866  | 2056  | 1944  | 1845  | 1427  | 1597  | 1919  | 1532  | 1909  | 1871  | Gpr137b  |
| Gpr137c  | 3157  | 2656  | 3119  | 4036  | 3654  | 3781  | 4390  | 2786  | 2609  | 2531  | 2570  | 2903  | 2358  | 2921  | 3241  | 2812  | 3472  | 3860  | 3594  | 3387  | 3949  | 3486  | 2131  | 2661  | 2799  | 2580  | 2530  | 2650  | Gpr137c  |
| Gpr139   | 398   | 459   | 353   | 579   | 844   | 687   | 780   | 670   | 535   | 567   | 384   | 299   | 396   | 454   | 512   | 389   | 511   | 637   | 727   | 793   | 792   | 805   | 524   | 390   | 534   | 199   | 396   | 427   | Gpr139   |
| Gpr141   | 8     | 5     | 4     | 8     | 5     | 7     | 4     | 11    | 7     | 4     | 9     | 1     | 7     | 3     | 9     | 5     | 1     | 2     | 5     | 4     | 4     | 10    | 19    | 14    | 17    | 6     | 10    | 5     | Gpr141   |
| Gpr142   | 3     | 3     | 7     | 11    | 5     | 2     | 4     | 2     | 1     | 1     | 4     | 7     | 5     | 4     | 7     | 5     | 8     | 9     |       |       |       |       |       |       |       |       |       |       |          |

|         |       |       |       |       |       |       |       |       |       |       |       |       |       |       |       |       |       |       |       |       |       |       |       |       |       |       |       |       |         |        |
|---------|-------|-------|-------|-------|-------|-------|-------|-------|-------|-------|-------|-------|-------|-------|-------|-------|-------|-------|-------|-------|-------|-------|-------|-------|-------|-------|-------|-------|---------|--------|
| Gpr25   | 15    | 3     | 13    | 22    | 20    | 15    | 12    | 9     | 7     | 20    | 20    | 0     | 3     | 0     | 15    | 7     | 2     | 14    | 31    | 8     | 30    | 18    | 12    | 14    | 8     | 7     | 1     | 1     | Gpr25   |        |
| Gpr26   | 419   | 403   | 232   | 660   | 1793  | 1510  | 1702  | 1788  | 2136  | 1993  | 1803  | 1302  | 717   | 1484  | 494   | 297   | 467   | 1008  | 1508  | 1554  | 1849  | 2212  | 1978  | 1439  | 2557  | 624   | 902   | 883   | Gpr26   |        |
| Gpr27   | 652   | 578   | 821   | 1139  | 1757  | 1261  | 1657  | 1920  | 1920  | 2324  | 2194  | 1605  | 1186  | 1702  | 745   | 551   | 1043  | 1322  | 1681  | 1475  | 1758  | 2455  | 1893  | 2329  | 2455  | 1664  | 1171  | 1422  | Gpr27   |        |
| Gpr3    | 186   | 263   | 178   | 247   | 199   | 152   | 221   | 24    | 17    | 34    | 32    | 10    | 32    | 17    | 177   | 228   | 233   | 284   | 171   | 221   | 246   | 33    | 14    | 21    | 13    | 18    | 6     | 27    | Gpr3    |        |
| Gpr31b  | 0     | 0     | 0     | 0     | 0     | 0     | 0     | 0     | 3     | 0     | 3     | 2     | 0     | 0     | 0     | 1     | 0     | 0     | 0     | 0     | 0     | 2     | 1     | 0     | 0     | 0     | 0     | 0     | 0       | Gpr31b |
| Gpr34   | 25    | 11    | 26    | 6     | 38    | 16    | 15    | 187   | 163   | 93    | 144   | 119   | 127   | 111   | 33    | 12    | 24    | 17    | 39    | 16    | 17    | 145   | 190   | 135   | 102   | 128   | 117   | 120   | Gpr34   |        |
| Gpr35   | 160   | 185   | 184   | 384   | 323   | 293   | 308   | 79    | 84    | 87    | 79    | 81    | 76    | 72    | 181   | 181   | 276   | 453   | 350   | 201   | 277   | 140   | 89    | 79    | 108   | 87    | 81    | 80    | Gpr35   |        |
| Gpr37   | 235   | 243   | 218   | 321   | 515   | 286   | 331   | 438   | 428   | 332   | 507   | 159   | 287   | 195   | 297   | 255   | 256   | 255   | 351   | 278   | 306   | 493   | 382   | 202   | 303   | 216   | 194   | 167   | Gpr37   |        |
| Gpr371l | 2     | 0     | 0     | 0     | 1     | 2     | 2     | 2     | 1     | 7     | 11    | 3     | 5     | 0     | 0     | 0     | 0     | 2     | 0     | 0     | 1     | 0     | 10    | 2     | 3     | 0     | 0     | 0     | Gpr371l |        |
| Gpr39   | 1     | 3     | 1     | 1     | 7     | 7     | 4     | 7     | 11    | 3     | 12    | 8     | 2     | 2     | 3     | 2     | 0     | 0     | 5     | 2     | 2     | 23    | 5     | 6     | 9     | 5     | 15    | 4     | Gpr39   |        |
| Gpr4    | 539   | 637   | 505   | 437   | 434   | 365   | 341   | 111   | 144   | 163   | 174   | 117   | 117   | 127   | 476   | 614   | 535   | 478   | 420   | 386   | 414   | 147   | 159   | 135   | 98    | 159   | 122   | 113   | Gpr4    |        |
| Gpr45   | 451   | 416   | 455   | 450   | 652   | 611   | 646   | 1055  | 933   | 1079  | 902   | 1054  | 874   | 1106  | 500   | 386   | 484   | 447   | 676   | 678   | 652   | 981   | 832   | 1039  | 1120  | 957   | 1010  | 883   | Gpr45   |        |
| Gpr50   | 531   | 713   | 287   | 470   | 340   | 292   | 382   | 249   | 270   | 169   | 144   | 248   | 69    | 235   | 505   | 445   | 504   | 476   | 297   | 493   | 437   | 404   | 231   | 229   | 248   | 456   | 256   | 205   | Gpr50   |        |
| Gpr52   | 24    | 12    | 16    | 13    | 42    | 30    | 46    | 35    | 30    | 29    | 20    | 24    | 12    | 24    | 21    | 10    | 8     | 14    | 15    | 39    | 31    | 37    | 38    | 27    | 29    | 18    | 14    | 20    | Gpr52   |        |
| Gpr55   | 1     | 3     | 0     | 0     | 2     | 7     | 0     | 5     | 7     | 8     | 1     | 5     | 2     | 1     | 0     | 2     | 0     | 1     | 2     | 0     | 0     | 2     | 5     | 1     | 0     | 2     | 0     | 0     | Gpr55   |        |
| Gpr6    | 20    | 10    | 10    | 28    | 14    | 49    | 18    | 7     | 10    | 12    | 5     | 10    | 7     | 7     | 9     | 13    | 15    | 25    | 33    | 14    | 24    | 17    | 6     | 17    | 24    | 5     | 8     | 8     | Gpr6    |        |
| Gpr61   | 55    | 73    | 51    | 47    | 153   | 74    | 66    | 116   | 126   | 154   | 146   | 53    | 93    | 71    | 84    | 107   | 95    | 100   | 78    | 69    | 77    | 170   | 109   | 85    | 121   | 43    | 65    | 74    | Gpr61   |        |
| Gpr62   | 8     | 2     | 10    | 9     | 7     | 6     | 8     | 1     | 7     | 15    | 14    | 8     | 3     | 13    | 7     | 6     | 5     | 8     | 2     | 1     | 12    | 10    | 12    | 8     | 0     | 9     | 0     | 7     | Gpr62   |        |
| Gpr63   | 178   | 141   | 183   | 225   | 253   | 274   | 222   | 254   | 250   | 243   | 267   | 262   | 316   | 235   | 165   | 153   | 200   | 210   | 232   | 214   | 245   | 211   | 229   | 230   | 262   | 194   | 314   | 265   | Gpr63   |        |
| Gpr65   | 18    | 18    | 41    | 25    | 13    | 11    | 13    | 42    | 44    | 18    | 59    | 38    | 37    | 36    | 22    | 33    | 9     | 35    | 10    | 25    | 19    | 27    | 71    | 42    | 43    | 53    | 29    | 28    | Gpr65   |        |
| Gpr68   | 13    | 10    | 7     | 7     | 41    | 13    | 32    | 37    | 49    | 52    | 50    | 39    | 37    | 23    | 11    | 18    | 9     | 30    | 18    | 16    | 31    | 70    | 43    | 27    | 57    | 26    | 13    | 33    | Gpr68   |        |
| Gpr75   | 129   | 182   | 199   | 433   | 339   | 238   | 332   | 183   | 193   | 239   | 237   | 194   | 128   | 181   | 182   | 174   | 355   | 403   | 340   | 215   | 348   | 359   | 203   | 203   | 292   | 138   | 120   | 161   | Gpr75   |        |
| Gpr82   | 0     | 0     | 0     | 0     | 0     | 0     | 0     | 0     | 2     | 0     | 0     | 0     | 0     | 0     | 0     | 0     | 0     | 0     | 0     | 0     | 0     | 0     | 0     | 0     | 0     | 2     | 0     | 1     | Gpr82   |        |
| Gpr83   | 46    | 65    | 49    | 88    | 106   | 84    | 92    | 90    | 59    | 106   | 155   | 67    | 81    | 74    | 96    | 79    | 68    | 86    | 80    | 82    | 88    | 150   | 129   | 92    | 99    | 60    | 44    | 53    | Gpr83   |        |
| Gpr84   | 16    | 15    | 3     | 14    | 12    | 15    | 4     | 10    | 20    | 19    | 13    | 16    | 5     | 15    | 18    | 9     | 9     | 9     | 10    | 5     | 15    | 13    | 11    | 12    | 20    | 10    | 1     | 7     | Gpr84   |        |
| Gpr85   | 1353  | 1380  | 1485  | 2071  | 2912  | 2271  | 3056  | 3776  | 3058  | 3315  | 2713  | 2278  | 1834  | 2490  | 1859  | 1239  | 1816  | 2233  | 2703  | 2984  | 3021  | 3957  | 3014  | 2834  | 3826  | 1872  | 2223  | 2298  | Gpr85   |        |
| Gpr87   | 0     | 0     | 0     | 0     | 2     | 0     | 0     | 5     | 18    | 17    | 0     | 4     | 2     | 1     | 0     | 0     | 0     | 0     | 0     | 0     | 0     | 5     | 13    | 2     | 0     | 0     | 0     | 0     | 0       | Gpr87  |
| Gpr88   | 70    | 65    | 46    | 141   | 255   | 163   | 227   | 314   | 446   | 404   | 445   | 227   | 116   | 253   | 108   | 72    | 95    | 132   | 168   | 128   | 264   | 448   | 329   | 355   | 453   | 204   | 88    | 160   | Gpr88   |        |
| Gpr89   | 2999  | 3120  | 1969  | 1561  | 1730  | 2337  | 2053  | 2920  | 2832  | 2062  | 2386  | 2111  | 2156  | 2099  | 2728  | 2826  | 1627  | 1705  | 1725  | 2703  | 2292  | 1930  | 2660  | 1883  | 2324  | 1857  | 2453  | 2124  | Gpr89   |        |
| Gprasp1 | 37592 | 34973 | 32339 | 37915 | 45302 | 43069 | 45747 | 46394 | 38186 | 39777 | 37463 | 33787 | 31087 | 36388 | 41210 | 32630 | 36615 | 40689 | 41003 | 46889 | 45094 | 48408 | 37022 | 35972 | 42414 | 26834 | 32763 | 31811 | Gprasp1 |        |
| Gprasp2 | 9409  | 8848  | 8114  | 10138 | 11396 | 10899 | 10949 | 10204 | 8945  | 9453  | 8530  | 7992  | 7007  | 8280  | 9966  | 8173  | 9114  | 10698 | 11089 | 11589 | 11470 | 11683 | 8686  | 8797  | 8105  | 6767  | 7638  | 7522  | Gprasp2 |        |
| Gprc5a  | 151   | 216   | 251   | 134   | 82    | 130   | 86    | 74    | 86    | 92    | 71    | 76    | 95    | 73    | 181   | 236   | 207   | 118   | 94    | 95    | 91    | 37    | 85    | 111   | 46    | 95    | 102   | 106   | Gprc5a  |        |
| Gprc5b  | 3751  | 4129  | 4561  | 4206  | 3814  | 3627  | 3510  | 3339  | 3431  | 3459  | 3113  | 3932  | 3848  | 3776  | 3542  | 3629  | 4451  | 3798  | 4122  | 3590  | 3758  | 2799  | 3390  | 3742  | 3317  | 4106  | 3720  | 4069  | Gprc5b  |        |
| Gprc5c  | 1347  | 1137  | 1205  | 760   | 808   | 922   | 583   | 964   | 1425  | 1176  | 1626  | 866   | 1461  | 734   | 1092  | 1441  | 924   | 855   | 662   | 553   | 496   | 1044  | 1557  | 1047  | 766   | 1258  | 1010  | 879   | Gprc5c  |        |
| Gprc5d  | 5     | 0     | 10    | 9     | 5     | 0     | 2     | 1     | 1     | 0     | 0     | 0     | 2     | 2     | 5     | 4     | 0     | 0     | 2     | 4     | 2     | 2     | 1     | 0     | 0     | 1     | 0     | 1     | Gprc5d  |        |
| Gprc6a  | 1     | 1     | 0     | 2     | 0     | 3     | 4     | 4     | 4     | 3     | 0     | 4     | 3     | 2     | 3     | 5     | 0     | 1     | 0     | 0     | 0     | 2     | 4     | 2     | 3     | 3     | 8     | 4     | Gprc6a  |        |
| Gprin1  | 4530  | 5744  | 6067  | 9524  | 11586 | 9088  | 9182  | 7614  | 7563  | 10454 | 7951  | 8467  | 6599  | 8442  | 5458  | 4125  | 8100  | 9600  | 11737 | 7433  | 11069 | 12375 | 6885  | 9411  | 11458 | 6928  | 7075  | 7798  | Gprin1  |        |
| Gprin2  | 3530  | 3511  | 2513  | 4101  | 5411  | 4950  | 4241  | 2850  | 2811  | 3142  | 2922  | 1927  | 2249  | 2021  | 3534  | 3602  | 3414  | 4142  | 4635  | 4067  | 4689  | 3494  | 2610  | 2328  | 3419  | 1024  | 2109  | 1791  | Gprin2  |        |
| Gprin3  | 170   | 101   | 67    | 103   | 214   | 209   | 149   | 321   | 413   | 284   | 336   | 98    | 146   | 119   | 141   | 128   | 87    | 108   | 122   | 181   | 231   | 256   | 328   | 153   | 260   | 89    | 145   | 82    | Gprin3  |        |
| Gps1    | 6422  | 7891  | 6275  | 6573  | 6185  | 6412  | 6128  | 6188  | 6697  | 5689  | 5575  | 6201  | 5856  | 5879  | 6649  | 6489  | 6343  | 6384  | 6986  | 6868  | 6322  | 5939  | 6695  | 6006  | 6161  | 6831  | 6463  | 6355  | Gps1    |        |
| Gps2    | 2292  | 2594  | 2854  | 2816  | 2208  | 2181  | 2267  | 2240  | 2537  | 2855  | 2451  | 3304  | 2809  | 3493  | 2135  | 2193  | 2684  | 2338  | 2753  | 2067  | 2309  | 2657  | 2357  | 3331  | 3063  | 3679  | 2980  | 3303  | Gps2    |        |
| Gpsm1   | 4667  | 6235  | 6661  | 7342  | 8275  | 7234  | 6267  | 7436  | 8696  | 10187 | 9988  | 10486 | 9283  | 9285  | 4738  | 5608  | 7566  | 7175  | 8056  | 5894  | 7030  | 10804 | 8153  | 10565 | 11311 | 9210  | 9395  | 8853  | Gpsm1   |        |
| Gpsm2   | 5797  | 5872  | 5802  | 5300  | 4597  | 4587  | 5367  | 4754  | 4224  | 4486  | 4185  | 6037  | 5182  | 6216  | 5757  | 5434  | 5782  | 4878  | 5102  | 5144  | 5158  | 3818  | 4224  | 5168  | 4686  | 6773  | 6241  | 6953  | Gpsm2   |        |
| Gpsm3   | 72    | 103   | 140   | 95    | 93    | 98    | 59    | 74    | 105   | 115   | 106   | 96    | 81    | 83    | 79    | 103   | 101   | 92    | 101   | 63    | 81    | 90    | 96    | 92    | 92    | 98    | 110   | 89    | Gpsm3   |        |
| Gpt     | 1102  | 1691  | 1800  | 1893  | 1809  | 1590  | 1771  | 855   | 836   | 1136  | 948   | 1144  | 873   | 1008  | 1023  | 1448  | 1951  | 1993  | 2280  | 1484  | 1721  | 1111  | 772   | 1124  | 1141  | 1041  | 1056  | 1040  | Gpt     |        |
| Gpt2    | 5687  | 5661  | 6347  | 5523  | 4998  | 4798  | 5107  | 2677  | 3065  | 3131  | 3198  | 2640  | 2861  | 2753  | 5259  | 5514  | 5757  | 5340  | 5432  | 4732  | 5164  | 2994  | 3297  | 3047  | 2896  | 3019  | 2593  | 2855  | Gpt2    |        |
| Gpx1    | 6429  | 8674  | 7320  | 5425  | 4519  | 4981  | 5107  | 5907  | 7228  | 5233  | 5559  | 6375  | 9426  | 7035  | 6638  | 7357  | 6262  | 4824  | 5377  | 6387  | 4477  | 4487  | 7554  | 5880  | 5678  | 7927  | 7870  | 9127  | Gpx1    |        |
| Gpx2    | 3     | 13    | 12    | 13    | 18    | 10    | 8     | 6     | 7     | 28    | 41    | 1     | 11    | 3     | 9     | 19    | 10    | 22    | 3     | 8     | 3     | 12    | 14    | 28    | 8     | 26    | 0     | 0     | Gpx2    |        |
| Gpx3    | 1047  | 1320  | 1194  | 815   | 796   | 791   | 603   | 729   | 863   | 761   | 1131  | 794   | 1100  | 788   | 1212  | 1491  | 1042  | 787   | 676   | 700   | 597   | 715   | 1151  | 621   | 646   | 1000  | 796   | 904   | Gpx3    |        |
| Gpx4    | 5768  | 7261  | 6410  | 6309  | 5393  | 5170  | 5361  | 5068  | 5871  | 4523  | 4842  | 4571  | 5433  | 5195  | 5989  | 6777  | 6157  | 5505  | 6029  | 6346  | 5502  | 4151  | 5970  | 5151  | 5195  | 5885  | 5843  | 5762  | Gpx4    |        |
| Gpx5    | 0     | 0     | 0     | 0     | 0     | 0     | 0     | 0     | 0     | 0     | 0     | 0     | 0     | 0     | 1     | 0     | 0     | 0     | 0     | 0     | 0     | 0     | 0     | 0     | 0     | 0     | 0     | 0     | Gpx5    |        |
| Gpx6    | 14    | 3     | 4     | 0     | 2     | 0     | 3     | 0     | 2     | 0     | 0     | 0     | 0     | 0     | 0     | 12    | 10    | 3     | 1     | 1     | 0     | 2     | 1     | 0     | 0     | 0     | 0     | 1     | Gpx6    |        |
| Gpx7    | 654   | 756   | 720   | 392   | 347   |       |       |       |       |       |       |       |       |       |       |       |       |       |       |       |       |       |       |       |       |       |       |       |         |        |



|         |      |      |       |      |      |      |       |       |      |      |      |       |      |       |       |      |      |      |       |       |       |       |      |      |      |       |       |       |         |
|---------|------|------|-------|------|------|------|-------|-------|------|------|------|-------|------|-------|-------|------|------|------|-------|-------|-------|-------|------|------|------|-------|-------|-------|---------|
| Grid1   | 420  | 521  | 395   | 854  | 1194 | 1035 | 1035  | 700   | 888  | 941  | 949  | 643   | 509  | 579   | 525   | 413  | 641  | 841  | 994   | 808   | 1021  | 1230  | 805  | 712  | 992  | 479   | 452   | 488   | Grid1   |
| Grid2   | 232  | 246  | 238   | 424  | 779  | 491  | 409   | 615   | 635  | 620  | 549  | 283   | 480  | 289   | 392   | 322  | 338  | 417  | 450   | 415   | 518   | 824   | 623  | 279  | 497  | 174   | 310   | 252   | Grid2   |
| Grid2lp | 215  | 308  | 253   | 219  | 282  | 204  | 229   | 77    | 91   | 87   | 84   | 124   | 79   | 92    | 262   | 288  | 308  | 286  | 241   | 217   | 230   | 80    | 60   | 79   | 98   | 52    | 79    | 95    | Grid2lp |
| Grfin   | 0    | 1    | 0     | 0    | 2    | 9    | 4     | 2     | 2    | 0    | 0    | 1     | 5    | 0     | 0     | 0    | 0    | 2    | 0     | 2     | 0     | 2     | 4    | 2    | 2    | 2     | 1     | 1     | Grfin   |
| Grik1   | 484  | 508  | 381   | 654  | 1196 | 959  | 1243  | 1112  | 1114 | 1085 | 915  | 534   | 576  | 649   | 717   | 507  | 585  | 985  | 1012  | 1115  | 1179  | 1225  | 994  | 790  | 1091 | 393   | 529   | 532   | Grik1   |
| Grik2   | 4804 | 4210 | 4401  | 6884 | 8841 | 8884 | 10650 | 6699  | 5437 | 6074 | 5711 | 6634  | 5012 | 6826  | 5141  | 3333 | 5456 | 7228 | 8047  | 8272  | 10003 | 7264  | 4941 | 6039 | 7731 | 4246  | 6149  | 6074  | Grik2   |
| Grik3   | 2159 | 2683 | 1865  | 4695 | 7413 | 5920 | 6062  | 5032  | 6106 | 8070 | 6298 | 6768  | 3818 | 6580  | 2606  | 2136 | 4332 | 5316 | 6481  | 4458  | 6398  | 9411  | 4409 | 7360 | 9693 | 4082  | 4874  | 4747  | Grik3   |
| Grik4   | 331  | 365  | 343   | 422  | 623  | 475  | 408   | 557   | 692  | 701  | 697  | 560   | 555  | 514   | 332   | 411  | 407  | 494  | 498   | 428   | 493   | 897   | 635  | 495  | 731  | 478   | 525   | 487   | Grik4   |
| Grik5   | 4188 | 5402 | 5856  | 7260 | 7940 | 6772 | 6277  | 6207  | 7712 | 9660 | 8178 | 9588  | 7549 | 8255  | 3970  | 4226 | 7116 | 7159 | 8316  | 5675  | 6810  | 10061 | 6895 | 9283 | 9984 | 8922  | 7835  | 7672  | Grik5   |
| Grin1   | 414  | 615  | 380   | 1060 | 2250 | 1424 | 1295  | 1130  | 1294 | 1548 | 1346 | 728   | 788  | 669   | 529   | 497  | 773  | 1304 | 1616  | 1340  | 1507  | 1855  | 1119 | 934  | 1641 | 385   | 561   | 542   | Grin1   |
| Grin2a  | 123  | 128  | 137   | 141  | 260  | 209  | 182   | 440   | 400  | 425  | 537  | 318   | 306  | 263   | 146   | 132  | 121  | 146  | 199   | 201   | 181   | 515   | 422  | 283  | 430  | 206   | 364   | 342   | Grin2a  |
| Grin2b  | 929  | 892  | 542   | 2545 | 4967 | 4346 | 4993  | 5074  | 5331 | 6493 | 5637 | 2700  | 2113 | 3600  | 1220  | 762  | 1330 | 3387 | 3642  | 3942  | 5590  | 6672  | 4524 | 4152 | 7327 | 1139  | 2262  | 2002  | Grin2b  |
| Grin2c  | 66   | 114  | 121   | 95   | 97   | 46   | 42    | 31    | 39   | 21   | 48   | 24    | 54   | 17    | 73    | 112  | 103  | 83   | 98    | 52    | 76    | 35    | 44   | 29   | 64   | 24    | 21    | 31    | Grin2c  |
| Grin2d  | 159  | 313  | 346   | 534  | 913  | 659  | 518   | 738   | 763  | 1199 | 1043 | 590   | 798  | 442   | 310   | 366  | 452  | 713  | 695   | 511   | 582   | 1546  | 653  | 829  | 1131 | 413   | 513   | 407   | Grin2d  |
| Grin3a  | 431  | 458  | 254   | 705  | 1683 | 1067 | 1172  | 1695  | 1703 | 1730 | 1608 | 747   | 798  | 760   | 603   | 389  | 487  | 855  | 1033  | 1213  | 1203  | 2202  | 1518 | 958  | 1598 | 428   | 747   | 676   | Grin3a  |
| Grin3b  | 22   | 36   | 45    | 58   | 43   | 31   | 31    | 15    | 20   | 26   | 25   | 18    | 25   | 28    | 26    | 52   | 46   | 72   | 67    | 35    | 37    | 18    | 19   | 30   | 11   | 10    | 12    | 13    | Grin3b  |
| Grina   | 4928 | 6068 | 5358  | 6236 | 6441 | 6280 | 5584  | 4910  | 5585 | 6079 | 5225 | 5559  | 5747 | 5196  | 4847  | 5682 | 6169 | 6371 | 6917  | 5969  | 5571  | 6691  | 5389 | 5666 | 6395 | 4985  | 5109  | 5146  | Grina   |
| Grin1p  | 2562 | 3130 | 3125  | 3180 | 3296 | 3310 | 3123  | 2989  | 3405 | 3589 | 3328 | 3595  | 3405 | 3427  | 2910  | 2953 | 3208 | 3058 | 3006  | 2963  | 3313  | 3578  | 3128 | 3388 | 3674 | 3233  | 3517  | 3369  | Grin1p  |
| Grip2   | 283  | 440  | 377   | 774  | 1294 | 951  | 872   | 634   | 859  | 1056 | 983  | 661   | 465  | 562   | 377   | 368  | 641  | 946  | 1085  | 855   | 945   | 1123  | 789  | 825  | 1065 | 377   | 503   | 464   | Grip2   |
| Gripap1 | 5120 | 5918 | 5655  | 6587 | 6812 | 6341 | 6602  | 6415  | 6460 | 7212 | 6396 | 7366  | 6747 | 7583  | 5595  | 4865 | 5988 | 6488 | 6551  | 6227  | 6714  | 7180  | 5825 | 7241 | 8053 | 6503  | 7330  | 7167  | Gripap1 |
| Grk1    | 246  | 228  | 139   | 281  | 201  | 264  | 248   | 27    | 32   | 30   | 37   | 39    | 35   | 45    | 241   | 210  | 187  | 261  | 178   | 185   | 245   | 30    | 19   | 38   | 20   | 25    | 37    | 28    | Grk1    |
| Grk2    | 3166 | 3523 | 4159  | 4138 | 4912 | 4059 | 3988  | 4842  | 5551 | 5854 | 5810 | 6096  | 5266 | 5488  | 3149  | 3159 | 4271 | 4030 | 4906  | 3445  | 4288  | 6127  | 5379 | 6077 | 6196 | 6493  | 5220  | 5387  | Grk2    |
| Grk3    | 2069 | 1997 | 1997  | 2497 | 3210 | 2955 | 2525  | 2262  | 2292 | 2610 | 2721 | 1947  | 2188 | 1957  | 2259  | 2177 | 2476 | 2747 | 2927  | 2630  | 2872  | 2872  | 2240 | 2254 | 2299 | 1601  | 2005  | 1777  | Grk3    |
| Grk4    | 298  | 229  | 241   | 241  | 303  | 247  | 204   | 285   | 284  | 262  | 338  | 315   | 354  | 255   | 256   | 301  | 239  | 278  | 284   | 235   | 249   | 336   | 317  | 329  | 318  | 291   | 301   | 292   | Grk4    |
| Grk5    | 4219 | 3822 | 3315  | 3880 | 3611 | 3755 | 3670  | 2235  | 2115 | 2004 | 2131 | 2065  | 2276 | 2140  | 3753  | 3699 | 3490 | 3351 | 3642  | 3680  | 3730  | 2112  | 1934 | 1968 | 2108 | 1749  | 2100  | 2190  | Grk5    |
| Grk6    | 6760 | 7784 | 8525  | 8471 | 7917 | 7883 | 7868  | 4634  | 5517 | 5641 | 5436 | 7154  | 6263 | 6628  | 5926  | 7012 | 8887 | 8283 | 9035  | 6632  | 8183  | 5210  | 4798 | 6364 | 6285 | 7875  | 6090  | 6597  | Grk6    |
| Grm1    | 196  | 185  | 126   | 401  | 607  | 544  | 684   | 573   | 665  | 523  | 470  | 449   | 128  | 480   | 218   | 142  | 284  | 509  | 598   | 610   | 634   | 707   | 521  | 467  | 743  | 293   | 300   | 343   | Grm1    |
| Grm2    | 123  | 230  | 377   | 273  | 345  | 230  | 220   | 275   | 330  | 344  | 289  | 445   | 389  | 428   | 186   | 210  | 351  | 249  | 346   | 280   | 261   | 438   | 258  | 441  | 497  | 338   | 382   | 447   | Grm2    |
| Grm3    | 239  | 291  | 208   | 150  | 342  | 386  | 298   | 648   | 689  | 455  | 522  | 482   | 464  | 363   | 376   | 238  | 176  | 185  | 284   | 470   | 434   | 546   | 931  | 300  | 494  | 201   | 530   | 427   | Grm3    |
| Grm4    | 242  | 298  | 461   | 514  | 743  | 515  | 474   | 485   | 534  | 930  | 731  | 804   | 669  | 673   | 293   | 307  | 598  | 591  | 734   | 412   | 551   | 1161  | 486  | 812  | 937  | 525   | 644   | 699   | Grm4    |
| Grm5    | 189  | 199  | 97    | 725  | 1878 | 1255 | 1340  | 1169  | 1242 | 1314 | 1295 | 355   | 396  | 348   | 360   | 192  | 262  | 1113 | 1112  | 1260  | 1608  | 1579  | 1592 | 729  | 1413 | 133   | 225   | 201   | Grm5    |
| Grm6    | 7    | 7    | 6     | 2    | 9    | 3    | 8     | 6     | 11   | 1    | 3    | 4     | 17   | 4     | 10    | 6    | 2    | 2    | 7     | 3     | 5     | 6     | 7    | 2    | 8    | 7     | 4     | Grm6  |         |
| Grm7    | 280  | 222  | 203   | 341  | 682  | 471  | 441   | 562   | 624  | 550  | 596  | 224   | 218  | 259   | 276   | 283  | 234  | 406  | 402   | 473   | 512   | 815   | 645  | 314  | 511  | 252   | 266   | 186   | Grm7    |
| Grm8    | 251  | 244  | 266   | 312  | 388  | 298  | 364   | 364   | 308  | 325  | 336  | 230   | 223  | 230   | 293   | 191  | 285  | 315  | 364   | 381   | 382   | 438   | 335  | 300  | 330  | 148   | 331   | 261   | Grm8    |
| Grn     | 5959 | 6921 | 7375  | 6521 | 5294 | 5555 | 4947  | 2793  | 3697 | 3695 | 4366 | 3170  | 4123 | 3092  | 5124  | 7911 | 6521 | 6759 | 5568  | 4300  | 4979  | 3581  | 4562 | 3626 | 3117 | 4038  | 3393  | 3223  | Grn     |
| Grp     | 15   | 11   | 8     | 18   | 39   | 31   | 30    | 50    | 49   | 39   | 75   | 5     | 3    | 30    | 29    | 9    | 24   | 18   | 31    | 37    | 32    | 25    | 63   | 56   | 37   | 47    | 14    | 32    | Grp     |
| Grpel1  | 5485 | 5881 | 4529  | 4388 | 3265 | 3730 | 4443  | 3544  | 3167 | 3026 | 2893 | 3117  | 2930 | 3670  | 5428  | 4953 | 4339 | 4052 | 3661  | 4633  | 4409  | 2777  | 3203 | 3103 | 3032 | 3463  | 3463  | 3585  | Grpel1  |
| Grpel2  | 5004 | 4798 | 4000  | 4678 | 4395 | 4656 | 5045  | 4940  | 4051 | 3810 | 3635 | 4096  | 3823 | 4242  | 4974  | 4590 | 4428 | 4514 | 4228  | 5312  | 4755  | 4341  | 4010 | 3818 | 4133 | 3881  | 3957  | 4082  | Grpel2  |
| Grpr    | 12   | 22   | 0     | 15   | 34   | 25   | 27    | 43    | 40   | 14   | 55   | 5     | 3    | 14    | 9     | 8    | 9    | 52   | 22    | 9     | 28    | 25    | 60   | 11   | 29   | 1     | 13    | 8     | Grpr    |
| Grsf1   | 9890 | 8665 | 10754 | 9573 | 9234 | 9004 | 10647 | 10186 | 8429 | 8544 | 8312 | 10671 | 9400 | 11310 | 10406 | 8592 | 9868 | 9196 | 10036 | 10002 | 9924  | 9327  | 8381 | 9787 | 9630 | 11667 | 10842 | 11954 | Grsf1   |
| Grtp1   | 1685 | 2032 | 1535  | 1925 | 1656 | 1811 | 1906  | 738   | 745  | 796  | 707  | 821   | 727  | 837   | 1582  | 1706 | 1783 | 1924 | 1918  | 1931  | 1853  | 605   | 780  | 817  | 827  | 916   | 791   | 812   | Grtp1   |
| Gruwd1  | 1624 | 1985 | 1984  | 1698 | 1397 | 1547 | 1395  | 1475  | 1709 | 1602 | 1717 | 1899  | 1979 | 1829  | 1419  | 1673 | 1810 | 1574 | 1513  | 1447  | 1386  | 1402  | 1741 | 1882 | 1695 | 2543  | 2107  | 2115  | Gruwd1  |
| Grxcr1  | 3    | 2    | 0     | 0    | 4    | 1    | 1     | 0     | 12   | 0    | 5    | 1     | 10   | 0     | 1     | 8    | 0    | 0    | 0     | 0     | 0     | 3     | 17   | 5    | 0    | 0     | 0     | 0     | Grxcr1  |
| Grxcr2  | 1    | 0    | 0     | 0    | 0    | 0    | 0     | 0     | 1    | 5    | 8    | 0     | 0    | 0     | 0     | 0    | 0    | 0    | 0     | 0     | 0     | 2     | 1    | 0    | 1    | 0     | 0     | 0     | Grxcr2  |
| Gsap    | 212  | 147  | 226   | 220  | 413  | 325  | 292   | 669   | 681  | 629  | 616  | 432   | 388  | 430   | 262   | 219  | 247  | 307  | 342   | 332   | 343   | 844   | 776  | 472  | 677  | 341   | 341   | 325   | Gsap    |
| Gsc     | 77   | 15   | 19    | 21   | 11   | 8    | 4     | 107   | 98   | 103  | 116  | 8     | 25   | 12    | 22    | 51   | 16   | 12   | 3     | 5     | 4     | 45    | 71   | 154  | 15   | 180   | 2     | 17    | Gsc     |
| Gsd2    | 8    | 5    | 14    | 2    | 6    | 19   | 3     | 9     | 9    | 13   | 6    | 1     | 17   | 6     | 7     | 3    | 9    | 7    | 12    | 2     | 5     | 28    | 10   | 13   | 16   | 6     | 8     | 9     | Gsd2    |
| Gsdma   | 3    | 0    | 0     | 0    | 0    | 0    | 0     | 6     | 4    | 3    | 0    | 0     | 5    | 0     | 0     | 0    | 0    | 1    | 1     | 0     | 0     | 0     | 3    | 2    | 3    | 3     | 3     | 0     | Gsdma   |
| Gsdma2  | 0    | 2    | 0     | 0    | 2    | 0    | 0     | 1     | 2    | 3    | 0    | 0     | 3    | 2     | 0     | 0    | 0    | 0    | 0     | 0     | 0     | 0     | 2    | 0    | 4    | 0     | 0     | 0     | Gsdma2  |
| Gsdma3  | 0    | 0    | 0     | 0    | 0    | 0    | 0     | 0     | 1    | 0    | 0    | 0     | 0    | 0     | 0     | 0    | 0    | 0    | 0     | 0     | 0     | 0     | 0    | 0    | 0    | 0     | 0     | 0     | Gsdma3  |
| Gsdmc   | 2    | 0    | 0     | 0    | 0    | 0    | 0     | 0     | 14   | 4    | 4    | 0     | 2    | 1     | 0     | 2    | 0    | 0    | 0     | 0     | 0     | 0     | 15   | 0    | 0    | 1     | 0     | 0     | Gsdmc   |
| Gsdmc2  | 0    | 0    | 0     | 0    | 0    |      |       |       |      |      |      |       |      |       |       |      |      |      |       |       |       |       |      |      |      |       |       |       |         |

|          |       |       |       |       |       |       |       |       |       |       |       |       |       |       |       |       |       |       |       |       |       |       |       |       |       |       |       |        |          |       |
|----------|-------|-------|-------|-------|-------|-------|-------|-------|-------|-------|-------|-------|-------|-------|-------|-------|-------|-------|-------|-------|-------|-------|-------|-------|-------|-------|-------|--------|----------|-------|
| Gstm5    | 4218  | 4313  | 3965  | 3718  | 2939  | 3483  | 3329  | 5230  | 4739  | 4138  | 4188  | 4027  | 4197  | 4517  | 4516  | 3704  | 3567  | 3178  | 3370  | 4060  | 3442  | 3873  | 4785  | 4265  | 3803  | 4998  | 4456  | 4841   | Gstm5    |       |
| Gstm6    | 368   | 428   | 468   | 296   | 329   | 264   | 370   | 376   | 303   | 348   | 268   | 344   | 335   | 400   | 340   | 403   | 335   | 330   | 320   | 363   | 312   | 438   | 305   | 333   | 337   | 472   | 395   | 470    | Gstm6    |       |
| Gstm7    | 1699  | 2122  | 1923  | 2381  | 2418  | 2246  | 2471  | 2330  | 2093  | 2654  | 2344  | 3028  | 2539  | 3270  | 1949  | 1500  | 2515  | 2079  | 2581  | 2108  | 2632  | 2617  | 1964  | 2839  | 2925  | 2867  | 2923  | 3052   | Gstm7    |       |
| Gsto1    | 2692  | 2655  | 2424  | 2335  | 2266  | 2244  | 2333  | 1362  | 1625  | 1679  | 1603  | 1385  | 1566  | 1340  | 2393  | 2797  | 2366  | 2202  | 2239  | 2369  | 2303  | 1469  | 1756  | 1497  | 1441  | 1607  | 1343  | 1518   | Gsto1    |       |
| Gsto2    | 31    | 39    | 24    | 20    | 8     | 36    | 20    | 42    | 55    | 30    | 52    | 42    | 57    | 60    | 24    | 35    | 22    | 34    | 34    | 18    | 27    | 42    | 57    | 29    | 45    | 57    | 65    | 42     | Gsto2    |       |
| Gstp1    | 6     | 10    | 5     | 8     | 10    | 6     | 4     | 9     | 7     | 10    | 7     | 7     | 5     | 4     | 5     | 9     | 10    | 2     | 4     | 7     | 8     | 3     | 52    | 6     | 3     | 11    | 13    | 6      | Gstp1    |       |
| Gstp2    | 0     | 0     | 0     | 0     | 0     | 0     | 0     | 0     | 0     | 0     | 0     | 0     | 0     | 0     | 0     | 0     | 0     | 0     | 0     | 0     | 0     | 0     | 3     | 0     | 0     | 0     | 1     | 0      | Gstp2    |       |
| Gstt1    | 426   | 546   | 460   | 393   | 337   | 393   | 329   | 219   | 324   | 252   | 257   | 164   | 205   | 182   | 393   | 471   | 457   | 417   | 315   | 371   | 286   | 251   | 399   | 225   | 206   | 168   | 199   | 216    | Gstt1    |       |
| Gstt2    | 397   | 432   | 494   | 366   | 326   | 306   | 297   | 159   | 185   | 183   | 250   | 182   | 249   | 186   | 407   | 474   | 377   | 335   | 311   | 258   | 292   | 180   | 254   | 175   | 185   | 254   | 279   | 183    | Gstt2    |       |
| Gstt3    | 361   | 259   | 208   | 224   | 104   | 131   | 83    | 61    | 79    | 67    | 145   | 29    | 57    | 37    | 264   | 380   | 173   | 204   | 80    | 104   | 89    | 70    | 182   | 60    | 54    | 89    | 17    | 21     | Gstt3    |       |
| Gstt4    | 2     | 2     | 7     | 3     | 2     | 4     | 2     | 0     | 2     | 1     | 4     | 1     | 1     | 1     | 5     | 2     | 7     | 0     | 2     | 4     | 3     | 2     | 0     | 3     | 0     | 0     | 0     | 0      | Gstt4    |       |
| Gstz1    | 1887  | 1887  | 1574  | 1627  | 1856  | 1977  | 1944  | 2728  | 2726  | 2386  | 2691  | 2521  | 2525  | 2677  | 1896  | 1751  | 1576  | 1647  | 1824  | 2072  | 1924  | 2366  | 2872  | 2261  | 2446  | 2361  | 2739  | 2606   | Gstz1    |       |
| Gsx1     | 84    | 131   | 205   | 136   | 204   | 147   | 146   | 232   | 198   | 298   | 236   | 405   | 306   | 435   | 108   | 53    | 249   | 90    | 243   | 117   | 162   | 354   | 183   | 361   | 299   | 377   | 423   | 503    | Gsx1     |       |
| Gsx2     | 191   | 283   | 197   | 264   | 231   | 202   | 317   | 281   | 218   | 290   | 185   | 492   | 60    | 479   | 241   | 72    | 403   | 240   | 378   | 243   | 298   | 229   | 93    | 373   | 243   | 639   | 259   | 386    | Gsx2     |       |
| Gtdc1    | 1731  | 1730  | 1468  | 1848  | 1848  | 1966  | 2143  | 2426  | 2209  | 2028  | 2188  | 2160  | 1810  | 2279  | 1996  | 1611  | 1534  | 1918  | 1857  | 2162  | 2176  | 2109  | 2379  | 1966  | 2377  | 2269  | 2017  | 2124   | Gtdc1    |       |
| Gtf2a1   | 3148  | 2293  | 4820  | 4070  | 4178  | 3719  | 4694  | 4866  | 4374  | 5854  | 5354  | 5928  | 5729  | 6182  | 3310  | 2541  | 4464  | 3962  | 4379  | 3663  | 3967  | 6112  | 4314  | 6258  | 6177  | 7557  | 6070  | 6575   | Gtf2a1   |       |
| Gtf2a11  | 12    | 11    | 5     | 7     | 2     | 3     | 8     | 7     | 6     | 3     | 7     | 9     | 10    | 4     | 7     | 13    | 9     | 1     | 5     | 8     | 10    | 2     | 5     | 5     | 5     | 1     | 13    | 0      | Gtf2a11  |       |
| Gtf2a2   | 6165  | 5055  | 5625  | 6092  | 5578  | 6028  | 7002  | 6591  | 5582  | 6283  | 6004  | 6857  | 6555  | 7696  | 6030  | 4979  | 5660  | 5653  | 5947  | 6651  | 6972  | 5770  | 5289  | 6511  | 6524  | 6823  | 7055  | 7340   | Gtf2a2   |       |
| Gtf2b    | 4171  | 4326  | 3804  | 3824  | 3341  | 3411  | 4061  | 3694  | 3271  | 2939  | 2694  | 3148  | 3164  | 3673  | 4676  | 4338  | 3737  | 3524  | 3451  | 4551  | 3639  | 3001  | 3197  | 3257  | 3003  | 3729  | 3435  | 3573   | Gtf2b    |       |
| Gtf2e1   | 5568  | 5296  | 5650  | 4895  | 4040  | 4361  | 4708  | 4759  | 4247  | 3909  | 3878  | 4625  | 4377  | 4895  | 5892  | 5004  | 5355  | 4774  | 4315  | 5057  | 4347  | 3999  | 4272  | 4410  | 4403  | 5549  | 4873  | 5256   | Gtf2e1   |       |
| Gtf2e2   | 6750  | 5907  | 6615  | 6318  | 5277  | 5300  | 6060  | 4361  | 3623  | 3492  | 3639  | 3844  | 3923  | 3962  | 7267  | 6548  | 6610  | 6168  | 5644  | 6671  | 5588  | 3609  | 3772  | 3932  | 3776  | 4735  | 4071  | 4215   | Gtf2e2   |       |
| Gtf2f1   | 5072  | 6404  | 6284  | 5755  | 5197  | 5193  | 5536  | 4739  | 5046  | 5089  | 4731  | 5305  | 4936  | 5893  | 5238  | 5095  | 6049  | 5162  | 5908  | 6053  | 5230  | 4114  | 4675  | 5485  | 5648  | 6106  | 5796  | 5807   | Gtf2f1   |       |
| Gtf2f2   | 2991  | 2910  | 2713  | 2776  | 2737  | 2740  | 3338  | 1906  | 1817  | 1821  | 1525  | 2219  | 1805  | 2177  | 3191  | 2929  | 2754  | 2812  | 2819  | 3674  | 3188  | 1440  | 1843  | 1894  | 1926  | 2274  | 2059  | 2398   | Gtf2f2   |       |
| Gtf2h1   | 5952  | 5253  | 5368  | 4536  | 3987  | 4473  | 4985  | 4421  | 3910  | 3669  | 3789  | 4127  | 3788  | 4221  | 5913  | 5615  | 4738  | 4424  | 4356  | 5177  | 4592  | 3639  | 3924  | 3901  | 3776  | 4304  | 3893  | 4463   | Gtf2h1   |       |
| Gtf2h2   | 2536  | 2066  | 2924  | 2349  | 2420  | 2418  | 2882  | 3276  | 2942  | 3066  | 3100  | 3401  | 3432  | 3391  | 2854  | 2576  | 2175  | 2343  | 2289  | 2736  | 2619  | 3018  | 3022  | 2992  | 3111  | 3513  | 3578  | 3705   | Gtf2h2   |       |
| Gtf2h3   | 3887  | 4093  | 4234  | 3612  | 2700  | 2757  | 3125  | 3054  | 3074  | 3001  | 3021  | 3486  | 3210  | 3432  | 3517  | 3539  | 3586  | 3286  | 3089  | 3160  | 2958  | 2542  | 2988  | 3160  | 2914  | 3914  | 3529  | 3681   | Gtf2h3   |       |
| Gtf2h4   | 1076  | 1238  | 1249  | 1103  | 947   | 945   | 917   | 1092  | 1228  | 1120  | 1091  | 1297  | 1219  | 1187  | 952   | 1143  | 1286  | 1009  | 1117  | 1062  | 893   | 924   | 1185  | 1315  | 1173  | 1517  | 1407  | 1385   | Gtf2h4   |       |
| Gtf2h5   | 5647  | 4895  | 5796  | 5732  | 5560  | 5189  | 5996  | 5882  | 5085  | 5266  | 5147  | 5183  | 5048  | 5601  | 5846  | 4611  | 5591  | 5493  | 5598  | 6040  | 5630  | 5095  | 5024  | 5581  | 5682  | 5878  | 5398  | 5772   | Gtf2h5   |       |
| Gtf2i    | 12704 | 12471 | 17091 | 14435 | 14882 | 14265 | 12942 | 26796 | 29042 | 35421 | 33256 | 39753 | 33886 | 34686 | 12092 | 12329 | 16236 | 13370 | 16315 | 11283 | 14161 | 32871 | 29170 | 37034 | 35002 | 40386 | 32418 | 36519  | Gtf2i    |       |
| Gtf2ird1 | 3246  | 3131  | 3955  | 3247  | 3578  | 3443  | 3057  | 4461  | 5085  | 5177  | 5348  | 5865  | 5141  | 5386  | 2867  | 2904  | 3582  | 3115  | 3754  | 2962  | 3253  | 5203  | 4871  | 5453  | 5176  | 5652  | 5571  | 5515   | Gtf2ird1 |       |
| Gtf2ird2 | 520   | 650   | 696   | 636   | 895   | 786   | 726   | 1546  | 1675  | 1933  | 1716  | 2026  | 1691  | 1793  | 492   | 539   | 809   | 684   | 868   | 739   | 760   | 2010  | 1628  | 1961  | 1694  | 1693  | 1791  | 1850   | Gtf2ird2 |       |
| Gtf3a    | 1806  | 2065  | 2067  | 1812  | 1793  | 1729  | 1749  | 1778  | 2089  | 2308  | 2077  | 2338  | 2097  | 2109  | 1636  | 1822  | 1853  | 1708  | 1888  | 1577  | 1782  | 1935  | 2073  | 2245  | 2025  | 2675  | 2069  | 2050   | Gtf3a    |       |
| Gtf3c1   | 11386 | 12289 | 11758 | 14216 | 14496 | 13986 | 12514 | 12395 | 14538 | 15740 | 14035 | 17567 | 15136 | 15044 | 10490 | 11576 | 13332 | 14103 | 15195 | 11200 | 13817 | 14715 | 13384 | 15374 | 16052 | 11660 | 14647 | 15196  | Gtf3c1   |       |
| Gtf3c2   | 4557  | 3858  | 4722  | 4582  | 3844  | 4241  | 4875  | 4181  | 3859  | 4843  | 4356  | 5168  | 4983  | 5677  | 4191  | 3787  | 4753  | 4318  | 4336  | 3916  | 4403  | 4274  | 3585  | 5132  | 4900  | 5515  | 4957  | 5756   | Gtf3c2   |       |
| Gtf3c3   | 2803  | 2298  | 2503  | 2218  | 2408  | 2532  | 2514  | 5486  | 4674  | 4204  | 4174  | 4608  | 4782  | 4937  | 2835  | 2277  | 2391  | 2070  | 2124  | 2950  | 2557  | 4451  | 4553  | 4288  | 4263  | 4503  | 5103  | 5041   | Gtf3c3   |       |
| Gtf3c4   | 16122 | 15897 | 11976 | 14170 | 13394 | 15033 | 14076 | 12167 | 10825 | 10499 | 10232 | 11308 | 10895 | 10852 | 15289 | 14035 | 13316 | 14705 | 14023 | 13935 | 15508 | 10733 | 10483 | 9775  | 11518 | 7972  | 11803 | 11096  | Gtf3c4   |       |
| Gtf3c5   | 1854  | 2019  | 2266  | 2060  | 2117  | 2072  | 1943  | 3309  | 3959  | 4088  | 3959  | 4923  | 4613  | 4591  | 1795  | 1921  | 2296  | 1920  | 2388  | 1940  | 1892  | 3962  | 3698  | 4394  | 4234  | 4911  | 4700  | 4787   | Gtf3c5   |       |
| Gtf3c6   | 2052  | 1811  | 2328  | 1688  | 1956  | 2028  | 2056  | 6074  | 4833  | 4807  | 4489  | 5979  | 5767  | 6562  | 2334  | 1704  | 2042  | 1484  | 1919  | 2224  | 1885  | 5000  | 4735  | 5704  | 5174  | 6688  | 6078  | 6903   | Gtf3c6   |       |
| Gtbbp1   | 7223  | 8638  | 7088  | 8054  | 7327  | 7844  | 7255  | 5453  | 5875  | 5912  | 5197  | 6424  | 5452  | 5919  | 6800  | 6655  | 7280  | 8084  | 8464  | 7477  | 7800  | 5556  | 5428  | 6304  | 6801  | 6380  | 6184  | Gtbbp1 |          |       |
| Gtbbp10  | 2279  | 1797  | 2031  | 1679  | 1794  | 1807  | 2153  | 2745  | 2522  | 2011  | 2070  | 2755  | 2506  | 2710  | 2217  | 2011  | 1742  | 1784  | 1783  | 2212  | 1951  | 2117  | 2445  | 2259  | 2242  | 2864  | 2966  | 2903   | Gtbbp10  |       |
| Gtbbp2   | 5282  | 6382  | 7032  | 8140  | 7675  | 6669  | 6764  | 4860  | 5608  | 6732  | 6343  | 6427  | 6208  | 6296  | 5105  | 6235  | 8129  | 7897  | 7826  | 6057  | 6995  | 6801  | 5225  | 6863  | 6515  | 6025  | 6093  | 6365   | Gtbbp2   |       |
| Gtbbp3   | 3002  | 3803  | 3632  | 3670  | 2441  | 2677  | 2624  | 1239  | 1407  | 1384  | 1580  | 1587  | 1592  | 1484  | 2645  | 3553  | 3427  | 3334  | 2662  | 2657  | 2457  | 1292  | 1447  | 1639  | 1378  | 1871  | 1712  | 1467   | Gtbbp3   |       |
| Gtbbp4   | 7623  | 6847  | 7807  | 6568  | 6005  | 6570  | 6955  | 8089  | 7055  | 6593  | 6609  | 8193  | 7496  | 8439  | 8181  | 7155  | 7071  | 6069  | 6512  | 7809  | 6352  | 6381  | 6985  | 7343  | 7146  | 8957  | 8923  | 8808   | Gtbbp4   |       |
| Gtbbp6   | 1119  | 1727  | 1703  | 1781  | 1717  | 1437  | 1376  | 1364  | 1496  | 1590  | 1544  | 1560  | 1435  | 1406  | 1158  | 1235  | 1855  | 1678  | 1813  | 1532  | 1529  | 1557  | 1425  | 1789  | 1682  | 1707  | 1576  | 1349   | Gtbbp6   |       |
| Gtbbp8   | 1889  | 1503  | 1619  | 1536  | 1771  | 1893  | 2105  | 2699  | 2383  | 2415  | 2307  | 2472  | 2364  | 2489  | 2103  | 1560  | 1643  | 1448  | 1745  | 1978  | 1809  | 2704  | 2305  | 2080  | 2612  | 2137  | 2404  | 2529   | Gtbbp8   |       |
| Gtse1    | 1801  | 2158  | 2673  | 1692  | 1363  | 1624  | 1516  | 1497  | 1752  | 1599  | 1482  | 2835  | 2342  | 2647  | 1456  | 1879  | 2153  | 1550  | 1785  | 1601  | 1406  | 1156  | 1447  | 2202  | 1855  | 3504  | 2664  | 2741   | Gtse1    |       |
| Gtsf1    | 0     | 0     | 0     | 0     | 0     | 0     | 0     | 0     | 2     | 0     | 1     | 0     | 1     | 0     | 0     | 0     | 0     | 0     | 0     | 0     | 0     | 0     | 0     | 0     | 0     | 0     | 1     | 0      | 0        | Gtsf1 |
| Gtsf11   | 0     | 1     | 0     | 0     | 0     | 0     | 0     | 0     | 2     | 3</   |       |       |       |       |       |       |       |       |       |       |       |       |       |       |       |       |       |        |          |       |

|        |       |       |        |        |       |       |       |       |       |       |       |       |       |       |       |       |       |       |       |       |       |       |       |       |       |       |       |       |        |        |      |
|--------|-------|-------|--------|--------|-------|-------|-------|-------|-------|-------|-------|-------|-------|-------|-------|-------|-------|-------|-------|-------|-------|-------|-------|-------|-------|-------|-------|-------|--------|--------|------|
| Gzmc   | 5     | 0     | 0      | 0      | 0     | 0     | 0     | 2     | 4     | 0     | 3     | 1     | 5     | 2     | 0     | 0     | 0     | 0     | 0     | 0     | 0     | 0     | 0     | 0     | 5     | 2     | 0     | 0     | 0      | 0      | Gzmc |
| Gzmd   | 0     | 1     | 0      | 0      | 0     | 0     | 0     | 0     | 6     | 0     | 0     | 0     | 0     | 0     | 0     | 0     | 0     | 0     | 0     | 0     | 0     | 0     | 0     | 2     | 2     | 0     | 0     | 0     | 0      | 0      | Gzmd |
| Gzme   | 0     | 0     | 0      | 0      | 0     | 0     | 0     | 0     | 2     | 0     | 0     | 0     | 0     | 0     | 0     | 0     | 0     | 0     | 0     | 0     | 0     | 0     | 0     | 3     | 1     | 0     | 0     | 0     | 0      | 0      | Gzme |
| Gzmf   | 0     | 1     | 0      | 0      | 0     | 0     | 0     | 0     | 10    | 0     | 0     | 0     | 0     | 0     | 0     | 0     | 0     | 0     | 0     | 0     | 0     | 0     | 0     | 6     | 0     | 0     | 0     | 0     | 0      | 0      | Gzmf |
| Gzmg   | 0     | 0     | 0      | 0      | 0     | 0     | 0     | 0     | 6     | 0     | 0     | 0     | 0     | 0     | 1     | 0     | 0     | 0     | 0     | 0     | 0     | 0     | 0     | 2     | 0     | 0     | 0     | 0     | 0      | 0      | Gzmg |
| Gzmm   | 2     | 3     | 0      | 2      | 1     | 0     | 1     | 2     | 2     | 3     | 2     | 0     | 0     | 1     | 5     | 0     | 3     | 0     | 7     | 8     | 0     | 0     | 2     | 1     | 8     | 4     | 6     | 0     | 0      | Gzmm   |      |
| Gzmm   | 159   | 206   | 202    | 231    | 245   | 211   | 238   | 87    | 103   | 106   | 121   | 124   | 79    | 98    | 162   | 172   | 227   | 238   | 249   | 199   | 249   | 69    | 112   | 103   | 142   | 119   | 95    | 104   | Gzmm   |        |      |
| H13    | 7742  | 8706  | 7289   | 8436   | 8997  | 9141  | 8419  | 10110 | 9650  | 10569 | 10078 | 9637  | 9372  | 9636  | 8057  | 7742  | 8112  | 8292  | 9012  | 8405  | 9061  | 11045 | 9306  | 9780  | 11176 | 8771  | 9380  | 9352  | H13    |        |      |
| H10    | 97290 | 93247 | 103697 | 102212 | 62258 | 70967 | 80068 | 23100 | 23314 | 27837 | 23083 | 32680 | 26484 | 33752 | 93663 | 76621 | 99659 | 85365 | 78084 | 74852 | 80360 | 17687 | 22485 | 32661 | 27323 | 39949 | 33073 | 34684 | H10    |        |      |
| H1f1   | 33    | 24    | 6      | 29     | 8     | 31    | 16    | 7     | 16    | 16    | 20    | 16    | 5     | 17    | 13    | 19    | 21    | 22    | 26    | 17    | 5     | 3     | 7     | 27    | 16    | 25    | 27    | 7     | H1f1   |        |      |
| H1f10  | 6225  | 7389  | 7324   | 8074   | 5267  | 4536  | 5020  | 2981  | 3048  | 3934  | 3187  | 5027  | 3229  | 4362  | 5498  | 4825  | 8144  | 6455  | 6199  | 4433  | 5655  | 3116  | 2696  | 4595  | 3772  | 6002  | 4030  | 4258  | H1f10  |        |      |
| H1f2   | 1339  | 1637  | 1139   | 1221   | 1348  | 1226  | 1766  | 307   | 466   | 385   | 453   | 420   | 460   | 342   | 1531  | 1354  | 1627  | 2192  | 1678  | 1529  | 1539  | 272   | 504   | 523   | 312   | 509   | 396   | 323   | H1f2   |        |      |
| H1f3   | 88    | 80    | 62     | 139    | 56    | 69    | 124   | 20    | 36    | 27    | 38    | 46    | 28    | 29    | 94    | 91    | 89    | 121   | 76    | 76    | 110   | 10    | 27    | 42    | 23    | 26    | 38    | 30    | H1f3   |        |      |
| H1f4   | 75    | 99    | 54     | 134    | 57    | 55    | 80    | 31    | 18    | 43    | 17    | 29    | 19    | 27    | 76    | 87    | 97    | 102   | 72    | 62    | 66    | 30    | 21    | 34    | 23    | 28    | 34    | 19    | H1f4   |        |      |
| H1f5   | 46    | 50    | 18     | 51     | 15    | 28    | 32    | 17    | 10    | 10    | 8     | 33    | 8     | 15    | 25    | 26    | 22    | 55    | 23    | 14    | 35    | 5     | 6     | 16    | 16    | 15    | 22    | 14    | H1f5   |        |      |
| H1f6   | 2     | 3     | 5      | 6      | 0     | 0     | 2     | 0     | 2     | 1     | 6     | 0     | 0     | 2     | 1     | 2     | 5     | 3     | 3     | 2     | 0     | 0     | 0     | 2     | 1     | 4     | 0     | 0     | H1f6   |        |      |
| H1f8   | 7     | 7     | 5      | 8      | 1     | 3     | 2     | 1     | 0     | 0     | 4     | 0     | 1     | 0     | 3     | 7     | 1     | 0     | 3     | 4     | 8     | 3     | 1     | 2     | 0     | 2     | 3     | 0     | H1f8   |        |      |
| H1f9   | 0     | 1     | 0      | 0      | 0     | 0     | 1     | 0     | 2     | 2     | 0     | 0     | 0     | 7     | 0     | 1     | 0     | 0     | 0     | 0     | 0     | 0     | 2     | 0     | 0     | 0     | 0     | 0     | 0      | H1f9   |      |
| H2-Aa  | 3     | 1     | 0      | 2      | 7     | 1     | 1     | 13    | 18    | 11    | 15    | 1     | 1     | 2     | 3     | 5     | 2     | 7     | 2     | 2     | 2     | 13    | 23    | 7     | 4     | 7     | 3     | 0     | H2-Aa  |        |      |
| H2-Ab1 | 526   | 592   | 737    | 474    | 299   | 389   | 351   | 32    | 26    | 19    | 39    | 29    | 34    | 20    | 402   | 459   | 676   | 369   | 443   | 341   | 386   | 18    | 39    | 27    | 23    | 45    | 35    | 38    | H2-Ab1 |        |      |
| H2ac1  | 0     | 0     | 2      | 0      | 0     | 0     | 0     | 0     | 0     | 0     | 0     | 0     | 0     | 0     | 0     | 0     | 0     | 0     | 0     | 0     | 0     | 0     | 0     | 0     | 0     | 0     | 0     | 0     | 0      | H2ac1  |      |
| H2ac10 | 149   | 154   | 54     | 90     | 89    | 119   | 178   | 223   | 264   | 131   | 153   | 160   | 203   | 173   | 142   | 134   | 53    | 94    | 135   | 157   | 94    | 139   | 168   | 206   | 173   | 219   | 246   | 201   | H2ac10 |        |      |
| H2ac11 | 95    | 79    | 91     | 76     | 61    | 90    | 59    | 68    | 45    | 56    | 53    | 91    | 92    | 86    | 99    | 85    | 70    | 69    | 75    | 83    | 49    | 48    | 64    | 74    | 67    | 147   | 95    | 57    | H2ac11 |        |      |
| H2ac12 | 9     | 13    | 1      | 22     | 8     | 7     | 10    | 10    | 7     | 10    | 12    | 8     | 12    | 17    | 16    | 20    | 3     | 24    | 6     | 8     | 1     | 7     | 6     | 11    | 2     | 9     | 14    | 1     | H2ac12 |        |      |
| H2ac13 | 51    | 45    | 35     | 59     | 29    | 40    | 25    | 27    | 38    | 36    | 50    | 33    | 44    | 29    | 37    | 61    | 41    | 26    | 43    | 70    | 39    | 47    | 36    | 48    | 34    | 73    | 55    | 28    | H2ac13 |        |      |
| H2ac15 | 33    | 27    | 27     | 21     | 14    | 32    | 19    | 10    | 12    | 20    | 24    | 37    | 18    | 31    | 20    | 23    | 22    | 14    | 18    | 24    | 10    | 12    | 19    | 9     | 19    | 41    | 36    | 14    | H2ac15 |        |      |
| H2ac19 | 10    | 8     | 4      | 17     | 19    | 21    | 6     | 12    | 26    | 16    | 17    | 15    | 12    | 6     | 7     | 4     | 23    | 11    | 24    | 8     | 12    | 35    | 17    | 22    | 20    | 19    | 16    | 9     | H2ac19 |        |      |
| H2ac20 | 9     | 6     | 2      | 10     | 3     | 8     | 3     | 1     | 2     | 0     | 3     | 2     | 0     | 3     | 4     | 5     | 0     | 1     | 2     | 4     | 2     | 2     | 2     | 5     | 0     | 2     | 8     | 0     | H2ac20 |        |      |
| H2ac21 | 12    | 22    | 10     | 24     | 14    | 46    | 31    | 24    | 23    | 34    | 11    | 33    | 20    | 48    | 15    | 12    | 22    | 25    | 18    | 30    | 26    | 20    | 23    | 25    | 43    | 21    | 23    | 24    | H2ac21 |        |      |
| H2ac22 | 3     | 2     | 1      | 8      | 7     | 4     | 2     | 1     | 1     | 4     | 5     | 7     | 6     | 3     | 4     | 2     | 6     | 3     | 5     | 9     | 0     | 0     | 1     | 2     | 2     | 4     | 10    | 1     | H2ac22 |        |      |
| H2ac23 | 662   | 415   | 533    | 496    | 276   | 380   | 202   | 466   | 335   | 315   | 257   | 475   | 382   | 226   | 647   | 340   | 460   | 366   | 535   | 503   | 248   | 292   | 256   | 525   | 390   | 1061  | 631   | 333   | H2ac23 |        |      |
| H2ac24 | 368   | 181   | 194    | 168    | 101   | 218   | 68    | 233   | 138   | 111   | 95    | 238   | 197   | 72    | 306   | 180   | 166   | 154   | 252   | 253   | 71    | 139   | 106   | 162   | 152   | 296   | 302   | 114   | H2ac24 |        |      |
| H2ac4  | 29    | 18    | 11     | 21     | 8     | 19    | 4     | 13    | 12    | 8     | 11    | 9     | 3     | 11    | 18    | 5     | 21    | 12    | 19    | 12    | 8     | 12    | 16    | 17    | 13    | 16    | 26    | 6     | H2ac4  |        |      |
| H2ac6  | 82    | 73    | 66     | 68     | 74    | 64    | 80    | 68    | 52    | 76    | 39    | 59    | 51    | 36    | 75    | 66    | 68    | 98    | 79    | 103   | 68    | 48    | 60    | 59    | 29    | 63    | 56    | 28    | H2ac6  |        |      |
| H2ac7  | 18    | 9     | 24     | 9      | 8     | 9     | 12    | 21    | 12    | 10    | 4     | 12    | 7     | 12    | 26    | 18    | 8     | 9     | 9     | 5     | 6     | 7     | 9     | 9     | 8     | 13    | 6     | 7     | H2ac7  |        |      |
| H2ac8  | 149   | 143   | 134    | 113    | 72    | 119   | 78    | 92    | 111   | 79    | 101   | 103   | 174   | 74    | 132   | 149   | 104   | 156   | 108   | 167   | 97    | 72    | 101   | 101   | 95    | 138   | 164   | 85    | H2ac8  |        |      |
| H2aj   | 2791  | 3322  | 3296   | 4393   | 3148  | 3127  | 3431  | 1608  | 1497  | 1854  | 1650  | 1905  | 1804  | 1886  | 2800  | 2710  | 3739  | 3900  | 3491  | 3377  | 3237  | 1719  | 1392  | 2102  | 2094  | 2229  | 1966  | 1778  | H2aj   |        |      |
| H2al1a | 0     | 0     | 0      | 0      | 0     | 0     | 0     | 0     | 0     | 0     | 0     | 0     | 0     | 0     | 0     | 0     | 0     | 0     | 0     | 0     | 0     | 0     | 5     | 0     | 0     | 0     | 0     | 0     | H2al1a |        |      |
| H2al1b | 0     | 0     | 0      | 1      | 0     | 0     | 0     | 0     | 0     | 0     | 0     | 0     | 0     | 0     | 0     | 0     | 0     | 0     | 0     | 0     | 0     | 0     | 0     | 0     | 0     | 0     | 0     | 0     | H2al1b |        |      |
| H2al1f | 0     | 0     | 0      | 0      | 0     | 0     | 0     | 0     | 0     | 0     | 0     | 0     | 0     | 0     | 0     | 0     | 0     | 0     | 0     | 0     | 0     | 2     | 0     | 0     | 0     | 0     | 0     | 0     | H2al1f |        |      |
| H2al1g | 0     | 0     | 0      | 0      | 1     | 0     | 0     | 0     | 0     | 0     | 0     | 0     | 0     | 0     | 0     | 0     | 0     | 0     | 0     | 0     | 0     | 0     | 0     | 0     | 0     | 0     | 0     | 0     | H2al1g |        |      |
| H2al1i | 0     | 0     | 0      | 1      | 0     | 0     | 0     | 0     | 0     | 0     | 0     | 0     | 0     | 0     | 0     | 0     | 0     | 0     | 0     | 0     | 0     | 0     | 0     | 0     | 0     | 0     | 0     | 0     | H2al1i |        |      |
| H2al1m | 3     | 2     | 0      | 0      | 1     | 0     | 0     | 4     | 3     | 12    | 2     | 3     | 6     | 6     | 4     | 2     | 0     | 4     | 3     | 0     | 1     | 0     | 0     | 0     | 3     | 6     | 7     | 1     | H2al1m |        |      |
| H2al1o | 0     | 0     | 0      | 0      | 0     | 0     | 0     | 0     | 0     | 1     | 0     | 0     | 0     | 0     | 0     | 0     | 0     | 1     | 0     | 0     | 0     | 0     | 0     | 0     | 0     | 0     | 0     | 0     | 1      | H2al1o |      |
| H2al2a | 1     | 0     | 2      | 3      | 2     | 4     | 2     | 2     | 0     | 3     | 0     | 1     | 0     | 0     | 1     | 2     | 6     | 0     | 0     | 1     | 2     | 2     | 2     | 0     | 0     | 3     | 1     | 1     | H2al2a |        |      |
| H2al3  | 0     | 0     | 2      | 0      | 0     | 0     | 0     | 0     | 0     | 0     | 0     | 0     | 0     | 0     | 0     | 0     | 0     | 7     | 2     | 4     | 0     | 0     | 0     | 0     | 0     | 0     | 0     | 0     | H2al3  |        |      |
| H2ap   | 0     | 0     | 0      | 0      | 0     | 0     | 2     | 0     | 1     | 2     | 0     | 0     | 0     | 2     | 0     | 0     | 0     | 0     | 0     | 0     | 3     | 0     | 0     | 0     | 0     | 0     | 0     | 0     | H2ap   |        |      |
| H2aw   | 1099  | 1011  | 1036   | 1749   | 1852  | 1508  | 2168  | 1485  | 1175  | 1657  | 1325  | 1426  | 1002  | 1571  | 1510  | 829   | 1600  | 1858  | 1792  | 1798  | 2264  | 1542  | 1271  | 1805  | 1635  | 1111  | 1189  | 1322  | H2aw   |        |      |
| H2ax   | 6962  | 7863  | 8978   | 7818   | 6122  | 5856  | 6159  | 4689  | 5333  | 5978  | 5411  | 8661  | 6386  | 7995  | 5902  | 6257  | 8762  | 7132  | 7222  | 5786  | 6460  | 4318  | 4689  | 7923  | 6168  | 11061 | 7205  | 7711  | H2ax   |        |      |
| H2az   | 27925 | 31452 | 33210  | 27435  | 21897 | 24915 | 25787 | 25756 | 25862 | 23094 | 20826 | 33032 | 29203 | 32186 | 27534 | 28147 | 29415 | 23293 | 29050 | 34596 | 25368 | 15869 | 22132 | 29253 | 25412 | 43082 | 37927 | 35348 | H2az   |        |      |
| H2az2  | 8656  | 10360 | 11929  | 10432  | 7700  | 7944  | 9821  | 6588  | 6841  | 7755  | 6959  | 10547 | 8915  | 11681 | 7985  | 7995  | 11777 | 9034  | 9828  | 9300  | 9527  | 5310  | 6320  | 10138 | 8856  | 12839 | 10708 | 11661 | H2az2  |        |      |
| H2bc1  | 0     | 0     | 0      | 0      | 0     | 0     | 0     | 0     | 0     | 0     | 0     | 0     | 0     | 0     | 0     | 0     | 0     | 0     | 0     | 0     | 1     | 0     | 0     | 0     | 0     | 0     | 0     | 0     | H2bc1  |        |      |
| H2bc11 | 55    | 54    | 44     | 60     | 24    | 31    | 32    | 33    | 21    | 34    | 43    | 46    | 39    | 34    | 50    | 47    | 60    | 62    | 43    | 50    | 49    | 17    | 26    | 29    | 21    | 41    | 62    | 89    | H2bc11 |        |      |
| H2bc12 | 50    | 54    | 84     | 49     | 20    | 55    | 31    | 34    | 24    | 30    | 32    | 42    | 48    | 71    | 40    | 62    | 36    | 32    | 48    | 40    | 36    | 13    | 24    | 41    | 37    | 66    | 80    | 71    | H2bc12 |        |      |
| H2bc13 | 18    | 17    | 12     | 16     | 9     | 13    | 19    | 10    | 17    | 5     | 12    | 25    | 16    | 20    | 13    | 10    | 3     | 15    | 9     | 22    | 15    | 20    | 13    | 22    | 14    | 36    | 27    | 24    | H2bc13 |        |      |
| H2bc14 | 32    | 24    | 15     | 20     | 16    | 22    | 10    | 12    | 4     | 15    | 1     | 29    | 16    | 16    | 17    | 8     | 8     | 29    | 17    | 24    | 15    | 5     | 13    | 32    | 13    | 15    | 17    | 30    | H2bc14 |        |      |
| H2bc15 | 18    | 19    | 11     | 20     | 12    | 16    | 11    | 15    | 10    | 9     | 14    | 8     | 16    | 15    | 7     | 5     |       |       |       |       |       |       |       |       |       |       |       |       |        |        |      |





|         |        |        |        |        |       |       |        |       |        |        |       |       |        |        |        |        |        |       |       |        |       |       |        |       |       |        |        |         |         |
|---------|--------|--------|--------|--------|-------|-------|--------|-------|--------|--------|-------|-------|--------|--------|--------|--------|--------|-------|-------|--------|-------|-------|--------|-------|-------|--------|--------|---------|---------|
| Haspin  | 1435   | 1249   | 1340   | 1289   | 808   | 975   | 1171   | 712   | 691    | 705    | 702   | 915   | 913    | 1043   | 1245   | 1363   | 1278   | 1027  | 1077  | 905    | 1032  | 570   | 604    | 730   | 743   | 1197   | 919    | 992     | Haspin  |
| Hat1    | 11220  | 9112   | 10554  | 8680   | 6397  | 7684  | 10081  | 7224  | 5988   | 5622   | 5011  | 7689  | 6149   | 8394   | 11247  | 9009   | 9732   | 8547  | 8493  | 10087  | 8624  | 4938  | 5384   | 6646  | 5875  | 9991   | 8218   | 8838    | Hat1    |
| Haus1   | 518    | 89     | 97     | 393    | 100   | 110   | 95     | 78    | 59     | 514    | 137   | 272   | 591    | 115    | 480    | 131    | 771    | 348   | 493   | 158    | 80    | 488   | 80     | 83    | 54    | 513    | 306    | 424     | Haus1   |
| Haus2   | 3579   | 2940   | 3166   | 2842   | 2610  | 2994  | 2920   | 2994  | 2647   | 2366   | 2410  | 3352  | 3040   | 3236   | 3422   | 2912   | 2818   | 2662  | 2749  | 3005   | 2855  | 2513  | 2681   | 2786  | 2648  | 3395   | 3307   | 3402    | Haus2   |
| Haus3   | 3383   | 2419   | 3157   | 2675   | 2117  | 2339  | 2776   | 2292  | 1801   | 1794   | 1660  | 2442  | 1987   | 2529   | 3231   | 3122   | 2899   | 2616  | 2300  | 2879   | 2621  | 1760  | 1927   | 2131  | 1821  | 2607   | 2496   | 2726    | Haus3   |
| Haus4   | 1411   | 1426   | 1289   | 1258   | 1216  | 1190  | 1452   | 1034  | 1168   | 982    | 1091  | 1489  | 1251   | 1297   | 1226   | 1216   | 1407   | 1205  | 1233  | 1335   | 1191  | 839   | 1082   | 1232  | 1046  | 1689   | 1470   | 1481    | Haus4   |
| Haus5   | 239    | 204    | 234    | 242    | 142   | 196   | 268    | 211   | 188    | 216    | 189   | 207   | 169    | 289    | 227    | 148    | 254    | 158   | 218   | 188    | 242   | 139   | 114    | 201   | 201   | 199    | 253    | 267     | Haus5   |
| Haus6   | 9465   | 7216   | 7719   | 7303   | 6029  | 7511  | 8295   | 5135  | 4618   | 4498   | 4470  | 6643  | 5939   | 6729   | 8247   | 7959   | 7157   | 6934  | 6322  | 7581   | 7128  | 4219  | 4095   | 5151  | 4971  | 6181   | 7096   | 6939    | Haus6   |
| Haus7   | 2706   | 2543   | 2527   | 2194   | 2247  | 2241  | 2265   | 2501  | 2182   | 2188   | 2042  | 2531  | 2327   | 2636   | 2527   | 2401   | 2299   | 2123  | 2303  | 2500   | 2112  | 2206  | 2061   | 2346  | 2383  | 2795   | 2499   | 2779    | Haus7   |
| Haus8   | 1813   | 1989   | 1732   | 1720   | 1661  | 1673  | 1720   | 1804  | 1889   | 1761   | 1730  | 1890  | 1812   | 1916   | 1659   | 1638   | 1880   | 1688  | 1960  | 1699   | 1651  | 1693  | 1764   | 1888  | 1955  | 2098   | 2024   | 1911    | Haus8   |
| Havcr1  | 0      | 0      | 5      | 0      | 0     | 0     | 3      | 2     | 5      | 0      | 19    | 1     | 2      | 1      | 0      | 1      | 0      | 0     | 0     | 3      | 0     | 0     | 8      | 2     | 0     | 1      | 2      | 0       | Havcr1  |
| Havcr2  | 54     | 38     | 66     | 90     | 43    | 66    | 57     | 40    | 36     | 35     | 41    | 49    | 39     | 48     | 98     | 55     | 61     | 58    | 61    | 56     | 60    | 55    | 32     | 29    | 40    | 56     | 35     | 33      | Havcr2  |
| Hax1    | 2855   | 2989   | 3162   | 3099   | 2620  | 2876  | 2920   | 3623  | 3477   | 3280   | 3315  | 3753  | 3569   | 4093   | 2695   | 2630   | 2994   | 2718  | 3151  | 3255   | 2862  | 2956  | 3368   | 3884  | 3368  | 4230   | 3975   | 4391    | Hax1    |
| Hba-a1  | 21548  | 38861  | 24379  | 30206  | 20882 | 36170 | 30623  | 25794 | 61007  | 27031  | 30807 | 23502 | 96020  | 24391  | 28396  | 35423  | 20272  | 36246 | 44593 | 58980  | 19475 | 21744 | 64180  | 22695 | 37705 | 28864  | 39341  | 43913   | Hba-a1  |
| Hba-a2  | 1623   | 2841   | 1279   | 1248   | 1155  | 1416  | 3427   | 1334  | 3966   | 2476   | 1697  | 1390  | 4555   | 3447   | 2291   | 1065   | 1417   | 1695  | 1502  | 3009   | 2725  | 1669  | 4337   | 2170  | 2305  | 737    | 1703   | 4937    | Hba-a2  |
| Hba-x   | 20307  | 46426  | 38562  | 15859  | 6568  | 10481 | 11453  | 8673  | 16500  | 11541  | 9768  | 16892 | 66921  | 36133  | 22219  | 36913  | 22275  | 10519 | 10970 | 16553  | 7135  | 5452  | 17267  | 8974  | 9980  | 26256  | 30100  | 85468   | Hba-x   |
| Hbb-bh1 | 10355  | 13663  | 16522  | 3214   | 897   | 2101  | 1685   | 2379  | 2359   | 1918   | 1254  | 5168  | 20418  | 14831  | 9351   | 15114  | 7565   | 1362  | 1422  | 3180   | 973   | 916   | 2240   | 1399  | 1267  | 8951   | 9324   | 39491   | Hbb-bh1 |
| Hbb-bh2 | 0      | 5      | 10     | 0      | 2     | 2     | 6      | 1     | 4      | 3      | 2     | 4     | 6      | 5      | 3      | 2      | 0      | 2     | 2     | 2      | 6     | 0     | 4      | 0     | 1     | 5      | 7      | Hbb-bh2 |         |
| Hbb-bs  | 2653   | 4545   | 1970   | 7662   | 9552  | 12230 | 18810  | 11130 | 33642  | 12368  | 13265 | 3855  | 12410  | 4399   | 4460   | 3606   | 2086   | 12997 | 16657 | 23429  | 12240 | 9274  | 34685  | 8959  | 16988 | 3262   | 4359   | 5708    | Hbb-bs  |
| Hbb-bt  | 3353   | 4355   | 3815   | 5115   | 4915  | 6320  | 10413  | 6709  | 13042  | 7542   | 6375  | 4109  | 12225  | 5836   | 4495   | 4477   | 3089   | 7142  | 8684  | 12457  | 7702  | 4610  | 15687  | 5569  | 8957  | 4265   | 5143   | 11166   | Hbb-bt  |
| Hbb-y   | 120673 | 182802 | 140702 | 107429 | 52658 | 77832 | 107296 | 98152 | 134913 | 103672 | 80826 | 99017 | 353904 | 161345 | 151038 | 135259 | 108038 | 82915 | 95332 | 148225 | 64596 | 53773 | 153808 | 74427 | 89905 | 124072 | 146702 | 331227  | Hbb-y   |
| Hbegf   | 526    | 453    | 483    | 539    | 707   | 591   | 580    | 413   | 378    | 428    | 515   | 348   | 288    | 310    | 588    | 517    | 503    | 618   | 660   | 547    | 609   | 508   | 530    | 414   | 484   | 418    | 285    | 306     | Hbegf   |
| Hbp1    | 6760   | 5377   | 5278   | 4793   | 4878  | 5302  | 5586   | 9086  | 8330   | 6869   | 7440  | 7021  | 7557   | 7233   | 6597   | 5964   | 5045   | 4897  | 5189  | 6076   | 5369  | 7157  | 8644   | 7473  | 6772  | 7420   | 7340   | 7456    | Hbp1    |
| Hbp1a   | 2      | 16     | 5      | 7      | 7     | 0     | 12     | 9     | 42     | 15     | 5     | 14    | 16     | 13     | 9      | 2      | 2      | 7     | 4     | 15     | 10    | 10    | 19     | 2     | 2     | 6      | 17     | Hbp1a   |         |
| Hbp1b   | 29     | 30     | 39     | 17     | 13    | 23    | 36     | 21    | 6      | 20     | 39    | 36    | 145    | 60     | 36     | 39     | 27     | 35    | 12    | 27     | 13    | 20    | 44     | 23    | 15    | 56     | 65     | 96      | Hbp1b   |
| Hbs1l   | 8346   | 7935   | 7976   | 7152   | 7041  | 7188  | 8094   | 7377  | 6882   | 7054   | 6858  | 8092  | 7469   | 8338   | 8333   | 7685   | 7723   | 7175  | 7238  | 7274   | 7857  | 7220  | 6765   | 7389  | 7438  | 7762   | 8092   | 8139    | Hbs1l   |
| Hc      | 22     | 11     | 9      | 16     | 11    | 25    | 28     | 21    | 11     | 20     | 12    | 29    | 37     | 37     | 26     | 12     | 13     | 25    | 10    | 10     | 16    | 23    | 21     | 35    | 38    | 39     | 20     | 38      | Hc      |
| Hcar1   | 8      | 11     | 21     | 6      | 11    | 5     | 9      | 20    | 46     | 49     | 35    | 25    | 27     | 19     | 4      | 5      | 7      | 4     | 7     | 5      | 4     | 47    | 58     | 26    | 22    | 17     | 15     | 14      | Hcar1   |
| Hcar2   | 0      | 1      | 0      | 0      | 0     | 0     | 0      | 1     | 10     | 4      | 2     | 0     | 7      | 0      | 0      | 2      | 0      | 1     | 0     | 0      | 0     | 0     | 9      | 1     | 1     | 0      | 1      | 1       | Hcar2   |
| Hccs    | 3692   | 2936   | 3487   | 3274   | 2998  | 3104  | 3530   | 2994  | 2394   | 1988   | 2240  | 2757  | 2623   | 2663   | 3911   | 3419   | 3436   | 3310  | 3203  | 3590   | 3187  | 2440  | 2432   | 2562  | 2357  | 2844   | 2839   | 2976    | Hccs    |
| Hcfc1   | 9672   | 10347  | 11478  | 10673  | 12104 | 11362 | 10275  | 19098 | 22385  | 24706  | 22338 | 32108 | 26333  | 27654  | 9141   | 9838   | 12140  | 10599 | 12994 | 9276   | 10629 | 24638 | 19540  | 26833 | 25495 | 20767  | 26040  | 27823   | Hcfc1   |
| Hcfc1r1 | 1486   | 2126   | 1613   | 1686   | 1958  | 1959  | 1456   | 1335  | 1763   | 1649   | 1689  | 1158  | 1555   | 1412   | 1528   | 1953   | 1716   | 1973  | 1947  | 1961   | 1528  | 1636  | 1745   | 1521  | 1636  | 1427   | 1228   | 1168    | Hcfc1r1 |
| Hcfc2   | 3328   | 2988   | 2665   | 3055   | 2855  | 2904  | 3122   | 3380  | 3034   | 2840   | 3243  | 2790  | 2768   | 3088   | 3361   | 3036   | 2815   | 2928  | 2825  | 3013   | 2917  | 3579  | 3108   | 3058  | 3165  | 2698   | 2817   | 2989    | Hcfc2   |
| Hck     | 110    | 88     | 117    | 44     | 73    | 74    | 58     | 134   | 143    | 81     | 139   | 85    | 98     | 77     | 83     | 136    | 96     | 76    | 53    | 85     | 64    | 82    | 152    | 94    | 76    | 98     | 100    | 77      | Hck     |
| Hcls1   | 136    | 150    | 206    | 181    | 121   | 159   | 113    | 167   | 214    | 186    | 268   | 210   | 209    | 234    | 157    | 185    | 167    | 149   | 107   | 132    | 124   | 159   | 327    | 225   | 193   | 290    | 206    | 274     | Hcls1   |
| Hcn1    | 134    | 68     | 63     | 162    | 300   | 120   | 129    | 254   | 279    | 289    | 297   | 70    | 135    | 95     | 169    | 124    | 72     | 176   | 110   | 152    | 167   | 329   | 256    | 142   | 170   | 136    | 83     | 81      | Hcn1    |
| Hcn2    | 476    | 793    | 813    | 1027   | 1116  | 813   | 796    | 147   | 194    | 265    | 205   | 137   | 120    | 111    | 497    | 665    | 934    | 1158  | 1065  | 720    | 906   | 307   | 192    | 226   | 213   | 154    | 78     | 127     | Hcn2    |
| Hcn3    | 1968   | 3163   | 3048   | 4798   | 4857  | 3629  | 3718   | 1479  | 1604   | 2273   | 1926  | 1793  | 1550   | 1621   | 2203   | 2459   | 4101   | 4581  | 4666  | 3374   | 4009  | 2542  | 1550   | 1977  | 2292  | 1425   | 1599   | 1435    | Hcn3    |
| Hcn4    | 1377   | 1482   | 2318   | 2671   | 3355  | 2824  | 2429   | 2052  | 2075   | 2970   | 2237  | 2535  | 2187   | 2543   | 1536   | 1485   | 2555   | 2605  | 3402  | 2310   | 2839  | 3477  | 2012   | 2730  | 3345  | 2089   | 2164   | 2458    | Hcn4    |
| Hcrt    | 0      | 0      | 2      | 0      | 0     | 0     | 1      | 0     | 2      | 3      | 1     | 0     | 0      | 0      | 0      | 1      | 2      | 0     | 6     | 0      | 3     | 0     | 1      | 2     | 3     | 0      | 0      | 0       | Hcrt    |
| Hcrr1   | 10     | 22     | 13     | 12     | 20    | 14    | 11     | 23    | 28     | 21     | 18    | 8     | 51     | 22     | 25     | 30     | 25     | 21    | 17    | 28     | 14    | 18    | 17     | 15    | 12    | 11     | 19     | 13      | Hcrr1   |
| Hcrr2   | 80     | 70     | 82     | 85     | 165   | 106   | 146    | 192   | 161    | 110    | 105   | 78    | 105    | 96     | 88     | 104    | 96     | 96    | 104   | 96     | 141   | 206   | 146    | 96    | 131   | 73     | 86     | 122     | Hcrr2   |
| Hcst    | 6      | 11     | 23     | 39     | 13    | 38    | 17     | 18    | 11     | 17     | 18    | 18    | 8      | 14     | 22     | 17     | 25     | 22    | 12    | 25     | 23    | 25    | 11     | 16    | 14    | 26     | 15     | 13      | Hcst    |
| Hdac1   | 16523  | 17237  | 18104  | 15783  | 12994 | 14043 | 14549  | 8821  | 8861   | 8066   | 8348  | 10460 | 10057  | 11629  | 15923  | 16173  | 17051  | 14901 | 15061 | 15164  | 14121 | 7346  | 8914   | 9868  | 8272  | 13321  | 11269  | 11794   | Hdac1   |
| Hdac10  | 912    | 1094   | 1043   | 1148   | 1241  | 1173  | 1136   | 1255  | 1505   | 1498   | 1379  | 1597  | 1306   | 1458   | 1055   | 1018   | 1203   | 1212  | 1290  | 1188   | 1115  | 1432  | 1424   | 1610  | 1615  | 1440   | 1479   | 1364    | Hdac10  |
| Hdac11  | 3934   | 5275   | 4403   | 5768   | 5648  | 5156  | 4988   | 3331  | 3475   | 3881   | 3733  | 3277  | 3206   | 3259   | 4122   | 4508   | 5552   | 6015  | 6104  | 5170   | 5232  | 4187  | 3769   | 3488  | 3747  | 3229   | 3174   | 3108    | Hdac11  |
| Hdac2   | 25962  | 22019  | 24828  | 24348  | 24700 | 23455 | 28994  | 35418 | 28719  | 28712  | 25268 | 29856 | 27025  | 33355  | 28300  | 21973  | 25678  | 23618 | 25591 | 27221  | 27262 | 30798 | 28017  | 30332 | 29638 | 32547  | 28651  | 32401   | Hdac2   |
| Hdac3   | 12064  | 12048  | 10474  | 11186  | 9755  | 8473  | 9400   | 9221  | 8826   | 7930   | 9127  | 8570  | 8958   | 11782  | 11081  | 10467  | 10620  | 10459 | 10372 | 10346  | 8763  | 8418  | 8532   | 9105  | 9972  | 9216   | 9142   | Hdac3   |         |
| Hdac4   | 2385   | 2661   | 2641   | 3008   | 3175  | 2691  | 2753   | 2213  | 2505   | 2861   | 2845  | 3012  | 2826   | 2994   | 2155   | 2560   | 2772   |       |       |        |       |       |        |       |       |        |        |         |         |

|          |       |       |       |       |       |       |       |       |       |       |       |       |       |       |       |       |       |       |       |       |       |       |       |       |       |       |       |       |          |       |
|----------|-------|-------|-------|-------|-------|-------|-------|-------|-------|-------|-------|-------|-------|-------|-------|-------|-------|-------|-------|-------|-------|-------|-------|-------|-------|-------|-------|-------|----------|-------|
| Hecw1    | 1889  | 1789  | 963   | 2753  | 4937  | 4586  | 4679  | 7767  | 7523  | 7136  | 6076  | 4744  | 4714  | 5273  | 2422  | 1650  | 1874  | 3256  | 3998  | 4399  | 4886  | 7780  | 6376  | 4834  | 8109  | 2648  | 4394  | 4043  | Hecw1    |       |
| Hecw2    | 648   | 695   | 682   | 684   | 899   | 768   | 608   | 1955  | 1813  | 1796  | 1844  | 1366  | 1865  | 1388  | 808   | 916   | 625   | 642   | 692   | 725   | 665   | 1800  | 1922  | 1331  | 1599  | 980   | 1554  | 1346  | Hecw2    |       |
| Heg1     | 3844  | 3768  | 5094  | 4351  | 4359  | 4883  | 4235  | 5061  | 5122  | 6222  | 6154  | 9517  | 8039  | 8496  | 3895  | 3712  | 4824  | 4199  | 4880  | 3691  | 4410  | 5589  | 4946  | 7017  | 7034  | 7071  | 10101 | 9184  | Heg1     |       |
| Helb     | 3136  | 3328  | 2918  | 2929  | 2470  | 2726  | 2600  | 902   | 1101  | 950   | 1006  | 996   | 1010  | 1026  | 2901  | 3124  | 2800  | 2923  | 2553  | 2683  | 2627  | 807   | 1113  | 1058  | 916   | 1044  | 1065  | 998   | Helb     |       |
| Hells    | 10615 | 7008  | 9799  | 7563  | 6815  | 8420  | 9269  | 8465  | 7259  | 6675  | 6443  | 10465 | 8908  | 10651 | 10138 | 8620  | 8442  | 7155  | 7871  | 9424  | 7998  | 5355  | 6064  | 8065  | 6859  | 11677 | 11252 | 10765 | Hells    |       |
| Helq     | 2746  | 2844  | 2232  | 2686  | 2610  | 2754  | 2912  | 1950  | 1945  | 1937  | 1938  | 2208  | 1988  | 2144  | 2633  | 2653  | 2432  | 2681  | 2406  | 2819  | 2646  | 1841  | 1808  | 1829  | 2152  | 1748  | 2292  | 2004  | Helq     |       |
| Helt     | 121   | 170   | 300   | 169   | 126   | 169   | 106   | 220   | 80    | 190   | 158   | 443   | 356   | 428   | 123   | 75    | 234   | 157   | 214   | 128   | 155   | 241   | 87    | 306   | 255   | 207   | 522   | 517   | Helt     |       |
| Helz     | 6915  | 6398  | 7177  | 7866  | 7987  | 7893  | 8351  | 4946  | 5409  | 6583  | 6571  | 6328  | 6098  | 6210  | 6193  | 7319  | 7394  | 8337  | 8034  | 6288  | 8225  | 6139  | 5088  | 5730  | 6833  | 4830  | 6004  | 5637  | Helz     |       |
| Helz2    | 674   | 780   | 572   | 523   | 549   | 580   | 324   | 388   | 555   | 563   | 771   | 464   | 678   | 410   | 566   | 1013  | 589   | 618   | 439   | 475   | 445   | 578   | 610   | 580   | 456   | 330   | 557   | 440   | Helz2    |       |
| Hem2n    | 39    | 46    | 112   | 3     | 1     | 11    | 4     | 24    | 33    | 23    | 37    | 75    | 117   | 142   | 36    | 83    | 21    | 12    | 6     | 17    | 4     | 12    | 27    | 24    | 7     | 93    | 79    | 460   | Hem2n    |       |
| Hemk1    | 867   | 960   | 1065  | 1151  | 1191  | 1246  | 1131  | 1418  | 1538  | 1791  | 1721  | 1667  | 1648  | 1484  | 984   | 953   | 1158  | 1155  | 1194  | 1118  | 1000  | 1734  | 1493  | 1621  | 1708  | 1042  | 1635  | 1441  | Hemk1    |       |
| Henmt1   | 23    | 26    | 27    | 28    | 37    | 23    | 21    | 24    | 23    | 36    | 65    | 23    | 39    | 39    | 9     | 34    | 29    | 26    | 26    | 25    | 21    | 37    | 40    | 26    | 27    | 24    | 33    | 42    | Henmt1   |       |
| Hepacam  | 16    | 28    | 5     | 39    | 120   | 62    | 34    | 82    | 147   | 157   | 150   | 24    | 37    | 26    | 18    | 26    | 3     | 52    | 55    | 40    | 43    | 190   | 182   | 42    | 93    | 19    | 26    | 18    | Hepacam  |       |
| Hepacam2 | 107   | 92    | 142   | 116   | 123   | 89    | 118   | 156   | 123   | 94    | 105   | 139   | 128   | 159   | 164   | 90    | 148   | 132   | 164   | 177   | 127   | 165   | 95    | 157   | 153   | 92    | 220   | 199   | Hepacam2 |       |
| Heph     | 3069  | 2367  | 2279  | 1269  | 1042  | 1543  | 948   | 2782  | 2811  | 2019  | 2714  | 2103  | 2973  | 2047  | 2624  | 2948  | 1633  | 1412  | 956   | 1298  | 906   | 1873  | 3330  | 2101  | 1579  | 2473  | 2487  | 2314  | Heph     |       |
| Heph1    | 2     | 0     | 1     | 2     | 0     | 0     | 2     | 0     | 0     | 3     | 8     | 0     | 0     | 0     | 3     | 0     | 0     | 0     | 0     | 0     | 0     | 0     | 6     | 0     | 0     | 0     | 0     | 0     | 0        | Heph1 |
| Herc1    | 33625 | 32586 | 14790 | 21076 | 24826 | 33130 | 28168 | 31142 | 27971 | 18703 | 19517 | 19049 | 19159 | 20181 | 35313 | 30985 | 17399 | 20915 | 22222 | 36933 | 32726 | 17246 | 25150 | 15078 | 22229 | 11580 | 23625 | 17279 | Herc1    |       |
| Herc2    | 23023 | 23866 | 11013 | 18842 | 22805 | 27685 | 23646 | 19583 | 21012 | 17158 | 20245 | 14709 | 16187 | 15619 | 22879 | 23126 | 13983 | 19140 | 19231 | 25032 | 29319 | 14608 | 17960 | 12358 | 20680 | 8322  | 18827 | 13092 | Herc2    |       |
| Herc3    | 4074  | 3941  | 3212  | 4557  | 5526  | 5025  | 5487  | 2645  | 2689  | 2713  | 2446  | 2348  | 2412  | 2346  | 4332  | 3805  | 3877  | 4956  | 4795  | 5067  | 5674  | 2949  | 2469  | 2266  | 2941  | 2003  | 2337  | 2223  | Herc3    |       |
| Herc4    | 7829  | 5739  | 6406  | 5780  | 5323  | 6134  | 6257  | 6166  | 5118  | 4690  | 4805  | 5414  | 5412  | 53643 | 6807  | 6389  | 6067  | 5639  | 5570  | 6329  | 5769  | 5048  | 5209  | 5103  | 4875  | 5388  | 5678  | 5623  | Herc4    |       |
| Herc6    | 175   | 124   | 178   | 132   | 131   | 181   | 175   | 158   | 190   | 160   | 202   | 213   | 245   | 235   | 171   | 156   | 160   | 127   | 150   | 157   | 134   | 152   | 181   | 216   | 141   | 218   | 261   | 204   | Herc6    |       |
| Herpud1  | 1494  | 1851  | 1624  | 1708  | 1559  | 1652  | 1465  | 1537  | 1696  | 1621  | 1763  | 1485  | 1477  | 1478  | 1542  | 1563  | 1775  | 1587  | 1699  | 1689  | 1616  | 1559  | 1783  | 1651  | 1582  | 1612  | 1546  | 1481  | Herpud1  |       |
| Herpud2  | 3760  | 3129  | 3934  | 4261  | 3700  | 3819  | 3965  | 3915  | 3374  | 3767  | 3645  | 4480  | 3842  | 4297  | 3513  | 3303  | 4070  | 3925  | 3783  | 3391  | 4028  | 4060  | 3498  | 4050  | 4022  | 4182  | 3904  | 4352  | Herpud2  |       |
| Hes1     | 1270  | 1212  | 1293  | 1388  | 1105  | 989   | 1258  | 1573  | 1657  | 1637  | 1864  | 2148  | 1826  | 2235  | 1130  | 1145  | 1150  | 1252  | 1162  | 1201  | 1205  | 1312  | 1816  | 2303  | 1647  | 2827  | 1772  | 2332  | Hes1     |       |
| Hes2     | 20    | 10    | 24    | 22    | 7     | 28    | 10    | 23    | 20    | 16    | 6     | 36    | 69    | 28    | 16    | 26    | 37    | 13    | 12    | 13    | 3     | 10    | 3     | 15    | 11    | 5     | 48    | 18    | Hes2     |       |
| Hes3     | 8     | 22    | 43    | 4     | 7     | 12    | 8     | 13    | 12    | 14    | 17    | 63    | 67    | 24    | 4     | 26    | 36    | 4     | 7     | 4     | 6     | 27    | 19    | 11    | 24    | 19    | 78    | 70    | Hes3     |       |
| Hes5     | 1653  | 2803  | 4519  | 2579  | 2295  | 2100  | 1676  | 2060  | 1760  | 2550  | 1786  | 4825  | 3880  | 4732  | 1904  | 1489  | 4719  | 1810  | 3027  | 1895  | 2227  | 2498  | 1758  | 3827  | 3253  | 4446  | 5051  | 5458  | Hes5     |       |
| Hes6     | 3587  | 5517  | 5237  | 4730  | 4210  | 4212  | 4133  | 4865  | 4531  | 4787  | 4580  | 6650  | 6175  | 6398  | 4133  | 3724  | 5862  | 3949  | 5114  | 4792  | 4194  | 4461  | 4598  | 6317  | 5654  | 6697  | 7283  | 6878  | Hes6     |       |
| Hes7     | 269   | 284   | 269   | 290   | 213   | 244   | 187   | 20    | 12    | 23    | 26    | 10    | 11    | 9     | 193   | 287   | 362   | 263   | 225   | 174   | 217   | 25    | 27    | 19    | 6     | 16    | 24    | 18    | Hes7     |       |
| Hesx1    | 14    | 3     | 3     | 1     | 4     | 1     | 0     | 0     | 7     | 0     | 4     | 4     | 1     | 3     | 8     | 8     | 2     | 2     | 0     | 0     | 0     | 7     | 5     | 2     | 1     | 10    | 5     | 4     | Hesx1    |       |
| Hexa     | 2575  | 2978  | 2745  | 2974  | 2757  | 2726  | 2424  | 2339  | 2843  | 2888  | 3516  | 2651  | 2885  | 2583  | 2666  | 3204  | 2851  | 3178  | 2755  | 2352  | 2578  | 3098  | 3350  | 2871  | 2750  | 2923  | 2672  | 2574  | Hexa     |       |
| Hexb     | 1989  | 1864  | 1866  | 1790  | 1905  | 1904  | 1589  | 1297  | 1549  | 1395  | 1666  | 1164  | 1194  | 1224  | 1985  | 2151  | 1633  | 2118  | 1688  | 1710  | 1742  | 1470  | 1814  | 1158  | 1237  | 1206  | 1210  | 1190  | Hexb     |       |
| Hexdc    | 1611  | 1843  | 1601  | 1948  | 2035  | 1951  | 1908  | 1541  | 1771  | 1929  | 1761  | 1840  | 1708  | 1924  | 1480  | 1616  | 1765  | 2032  | 1860  | 1846  | 1902  | 1811  | 1652  | 1902  | 2010  | 1786  | 1669  | 1712  | Hexdc    |       |
| Hexim1   | 3205  | 4001  | 3905  | 4202  | 3674  | 3335  | 3381  | 2805  | 3372  | 3540  | 3259  | 3126  | 3607  | 3131  | 2942  | 3403  | 4117  | 3921  | 3929  | 3731  | 3299  | 2854  | 3242  | 3698  | 3246  | 3764  | 3297  | 3201  | Hexim1   |       |
| Hexim2   | 236   | 231   | 235   | 278   | 345   | 331   | 354   | 459   | 469   | 530   | 427   | 365   | 371   | 404   | 243   | 188   | 246   | 307   | 343   | 337   | 365   | 444   | 477   | 401   | 521   | 419   | 385   | 430   | Hexim2   |       |
| Hey1     | 2587  | 2336  | 2393  | 2306  | 2258  | 2034  | 2367  | 2911  | 2283  | 2649  | 2162  | 2965  | 3112  | 3185  | 2238  | 2237  | 2225  | 2058  | 2491  | 2334  | 2166  | 1963  | 2207  | 3099  | 2533  | 4233  | 2936  | 3336  | Hey1     |       |
| Hey2     | 1288  | 879   | 900   | 745   | 893   | 792   | 702   | 1498  | 1405  | 1079  | 1041  | 867   | 1048  | 842   | 1006  | 1293  | 712   | 903   | 531   | 689   | 628   | 907   | 1504  | 1001  | 775   | 1052  | 782   | 774   | Hey2     |       |
| Heyl     | 550   | 721   | 784   | 545   | 787   | 473   | 525   | 818   | 892   | 892   | 1229  | 1002  | 1199  | 926   | 625   | 959   | 735   | 671   | 524   | 379   | 539   | 1158  | 1146  | 937   | 862   | 1124  | 937   | 965   | Heyl     |       |
| Hfe      | 211   | 230   | 233   | 158   | 199   | 164   | 124   | 197   | 249   | 170   | 225   | 241   | 262   | 167   | 249   | 280   | 141   | 155   | 133   | 159   | 155   | 266   | 310   | 127   | 163   | 189   | 156   | 151   | Hfe      |       |
| Hfm1     | 738   | 637   | 612   | 632   | 839   | 812   | 817   | 1552  | 1281  | 1198  | 1156  | 1248  | 1281  | 1430  | 897   | 725   | 588   | 715   | 755   | 1053  | 899   | 1357  | 1225  | 1003  | 1406  | 915   | 1379  | 1167  | Hfm1     |       |
| Hgd      | 3     | 13    | 9     | 6     | 1     | 8     | 7     | 9     | 12    | 1     | 11    | 10    | 15    | 12    | 11    | 6     | 2     | 10    | 15    | 9     | 6     | 5     | 5     | 19    | 5     | 7     | 22    | 13    | Hgd      |       |
| Hgf      | 144   | 59    | 56    | 51    | 34    | 18    | 12    | 161   | 212   | 129   | 198   | 80    | 113   | 50    | 80    | 92    | 34    | 8     | 19    | 13    | 28    | 80    | 194   | 129   | 76    | 122   | 37    | 66    | Hgf      |       |
| Hgfac    | 90    | 163   | 147   | 173   | 124   | 148   | 103   | 77    | 91    | 119   | 93    | 79    | 95    | 51    | 131   | 179   | 158   | 182   | 146   | 153   | 122   | 85    | 95    | 96    | 79    | 66    | 89    | 64    | Hgfac    |       |
| Hgh1     | 1053  | 1268  | 1213  | 1477  | 1196  | 1080  | 959   | 896   | 894   | 967   | 1035  | 1038  | 949   | 881   | 1019  | 1125  | 1234  | 1335  | 1303  | 1055  | 1237  | 897   | 927   | 1053  | 930   | 1170  | 1037  | 1031  | Hgh1     |       |
| Hgs      | 4705  | 6228  | 6318  | 6963  | 5919  | 5408  | 5254  | 4256  | 5100  | 6105  | 5245  | 6100  | 5129  | 5286  | 4770  | 5474  | 6587  | 6776  | 6604  | 4742  | 5811  | 5997  | 5001  | 6106  | 6200  | 6111  | 5072  | 5270  | Hgs      |       |
| Hgsnat   | 2579  | 2567  | 1993  | 2024  | 1816  | 2102  | 1885  | 1750  | 1989  | 1685  | 1718  | 1636  | 2014  | 1748  | 2607  | 2569  | 1812  | 1990  | 1941  | 1963  | 1841  | 1663  | 2073  | 1618  | 1721  | 1748  | 1764  | 1870  | Hgsnat   |       |
| Hhat     | 91    | 78    | 85    | 54    | 43    | 76    | 42    | 311   | 279   | 270   | 368   | 316   | 366   | 351   | 86    | 115   | 81    | 50    | 57    | 46    | 43    | 294   | 322   | 290   | 297   | 394   | 427   | 322   | Hhat     |       |
| Hhata    | 45    | 62    | 35    | 98    | 45    | 43    | 42    | 6     | 15    | 34    | 35    | 8     | 15    | 1     | 24    | 43    | 73    | 81    | 56    | 39    | 51    | 17    | 27    | 11    | 3     | 7     | 6     | 9     | Hhata    |       |
| Hhex     | 12    | 7     | 14    | 20    | 23    | 17    | 8     | 17    | 5     | 4     | 8     | 4     | 14    | 6     | 8     | 16    | 8     | 12    | 8     | 7     | 10    | 13    | 16    | 5     | 7     | 16    | 8     | 14    | Hhex     |       |
| Hhip     | 766   | 668   | 540   | 454   | 542   | 475   | 560   | 667   | 840   | 470   | 884   |       |       |       |       |       |       |       |       |       |       |       |       |       |       |       |       |       |          |       |

|        |       |       |       |       |       |       |       |       |       |       |       |       |       |       |       |       |       |       |       |       |       |       |       |       |       |       |       |       |        |        |
|--------|-------|-------|-------|-------|-------|-------|-------|-------|-------|-------|-------|-------|-------|-------|-------|-------|-------|-------|-------|-------|-------|-------|-------|-------|-------|-------|-------|-------|--------|--------|
| Hivep2 | 1869  | 1981  | 1464  | 2224  | 3395  | 3095  | 2981  | 3215  | 3776  | 3873  | 4790  | 2930  | 3512  | 2799  | 2024  | 2012  | 1881  | 2588  | 2845  | 2372  | 3187  | 4171  | 3933  | 2643  | 4397  | 1524  | 3140  | 2530  | Hivep2 |        |
| Hivep3 | 496   | 669   | 519   | 920   | 1372  | 735   | 840   | 673   | 880   | 1044  | 1055  | 510   | 686   | 493   | 549   | 585   | 693   | 1072  | 1121  | 657   | 979   | 1979  | 1440  | 668   | 695   | 1205  | 233   | 367   | 368    | Hivep3 |
| Hjupr  | 20633 | 19758 | 16866 | 17067 | 16318 | 18384 | 16936 | 26216 | 26632 | 24628 | 27085 | 29932 | 28738 | 28525 | 17951 | 20590 | 16439 | 16537 | 17362 | 17903 | 18130 | 20954 | 25388 | 24814 | 25758 | 25481 | 31606 | 28660 | Hjupr  |        |
| Hjv    | 77    | 42    | 68    | 51    | 41    | 29    | 25    | 39    | 67    | 27    | 585   | 26    | 45    | 18    | 45    | 58    | 57    | 25    | 52    | 42    | 41    | 75    | 361   | 25    | 30    | 31    | 9     | 23    | Hjv    |        |
| Hk1    | 10269 | 11274 | 11430 | 12450 | 12603 | 11185 | 10747 | 5409  | 6657  | 7286  | 6730  | 5346  | 5700  | 5253  | 10123 | 11099 | 11953 | 13137 | 12571 | 9606  | 11749 | 8101  | 6331  | 6293  | 7026  | 5418  | 4951  | 5187  | Hk1    |        |
| Hk2    | 5169  | 5513  | 5995  | 5721  | 3855  | 4729  | 4622  | 1884  | 2071  | 2269  | 2304  | 2876  | 2355  | 2935  | 4685  | 4932  | 5646  | 5291  | 4810  | 4036  | 4649  | 1395  | 1910  | 2710  | 2174  | 3197  | 2922  | 3343  | Hk2    |        |
| Hk3    | 97    | 112   | 108   | 56    | 83    | 84    | 74    | 67    | 128   | 133   | 180   | 110   | 111   | 93    | 95    | 129   | 73    | 117   | 81    | 89    | 108   | 104   | 148   | 106   | 139   | 98    | 122   | 91    | Hk3    |        |
| Hkdc1  | 30    | 22    | 28    | 17    | 42    | 28    | 10    | 37    | 62    | 63    | 94    | 52    | 101   | 28    | 17    | 55    | 21    | 22    | 12    | 21    | 19    | 72    | 128   | 28    | 36    | 33    | 59    | 46    | Hkdc1  |        |
| Hlcs   | 1195  | 1177  | 1578  | 1198  | 1087  | 1055  | 1134  | 1025  | 1155  | 1253  | 1189  | 1565  | 1592  | 1459  | 1017  | 1132  | 1421  | 1311  | 1166  | 920   | 1014  | 1101  | 1065  | 1508  | 1170  | 1578  | 1471  | 1613  | Hlcs   |        |
| Hlf    | 1521  | 1475  | 1696  | 1865  | 1668  | 1541  | 1682  | 821   | 1018  | 882   | 1110  | 942   | 988   | 958   | 1551  | 1749  | 1604  | 2076  | 1397  | 1402  | 1771  | 1198  | 1115  | 1092  | 1174  | 849   | 941   | 816   | Hlf    |        |
| Hlft   | 5567  | 4523  | 4933  | 4967  | 4786  | 5201  | 5673  | 4835  | 3927  | 3705  | 3543  | 4038  | 3755  | 4059  | 5914  | 5256  | 4755  | 5042  | 4729  | 5677  | 5354  | 4151  | 3846  | 4041  | 3829  | 3481  | 3814  | 3888  | Hlft   |        |
| Hlx    | 63    | 108   | 87    | 97    | 74    | 43    | 47    | 71    | 133   | 101   | 204   | 108   | 99    | 78    | 86    | 102   | 107   | 79    | 73    | 59    | 63    | 110   | 228   | 113   | 111   | 106   | 77    | 78    | Hlx    |        |
| Hmbox1 | 5456  | 5687  | 4347  | 5211  | 5970  | 6058  | 5442  | 7233  | 7404  | 6779  | 7444  | 7761  | 7649  | 7211  | 5203  | 5393  | 4857  | 5192  | 5764  | 5493  | 5728  | 6624  | 6684  | 6077  | 7921  | 5879  | 8455  | 6760  | Hmbox1 |        |
| Hmbs   | 1284  | 1475  | 1416  | 850   | 695   | 764   | 810   | 1860  | 2022  | 1626  | 1633  | 2152  | 2461  | 2363  | 1246  | 1446  | 1020  | 824   | 880   | 851   | 784   | 1592  | 2027  | 1814  | 1569  | 2561  | 2350  | 3037  | Hmbs   |        |
| Hmces  | 2070  | 1841  | 2027  | 1979  | 1653  | 1765  | 1874  | 1502  | 1373  | 1466  | 1332  | 1526  | 1331  | 1573  | 1742  | 1768  | 1955  | 1783  | 1975  | 1689  | 1857  | 1353  | 1377  | 1609  | 1469  | 1953  | 1557  | 1670  | Hmces  |        |
| Hmcn1  | 8538  | 6245  | 2276  | 1988  | 1028  | 2925  | 565   | 6014  | 7364  | 3771  | 6097  | 2688  | 4656  | 2808  | 6152  | 11108 | 1736  | 2430  | 723   | 1155  | 811   | 2558  | 7218  | 3425  | 2283  | 3214  | 3857  | 2808  | Hmcn1  |        |
| Hmcn2  | 20    | 35    | 38    | 55    | 85    | 36    | 54    | 33    | 27    | 54    | 45    | 43    | 40    | 28    | 30    | 58    | 22    | 63    | 31    | 44    | 59    | 67    | 48    | 31    | 40    | 28    | 48    | 18    | Hmcn2  |        |
| Hmg20a | 4885  | 4644  | 4411  | 4538  | 5468  | 5119  | 5111  | 9064  | 8829  | 8839  | 9196  | 8780  | 8386  | 9207  | 4917  | 4707  | 4551  | 4788  | 5032  | 4997  | 5511  | 9633  | 8447  | 8644  | 9072  | 7898  | 8910  | 8651  | Hmg20a |        |
| Hmg20b | 4334  | 5809  | 6521  | 5835  | 4246  | 4162  | 3913  | 2275  | 2648  | 2939  | 2880  | 3687  | 3371  | 3232  | 3998  | 5037  | 6283  | 5119  | 5068  | 3734  | 4061  | 2341  | 2549  | 3505  | 2691  | 4137  | 3383  | 3329  | Hmg20b |        |
| Hmga1  | 6685  | 8066  | 9242  | 5982  | 4858  | 5362  | 4958  | 4418  | 5311  | 4966  | 4746  | 6683  | 5998  | 6112  | 5519  | 7197  | 8029  | 5357  | 6200  | 5150  | 4950  | 3855  | 4997  | 5946  | 4551  | 8759  | 6817  | 6966  | Hmga1  |        |
| Hmga1b | 865   | 1029  | 1404  | 778   | 623   | 518   | 594   | 567   | 549   | 717   | 602   | 896   | 696   | 1021  | 696   | 706   | 1207  | 683   | 782   | 485   | 693   | 418   | 481   | 895   | 666   | 1110  | 784   | 940   | Hmga1b |        |
| Hmga2  | 11267 | 6431  | 8824  | 3765  | 2289  | 3204  | 3024  | 7723  | 8259  | 6303  | 8133  | 10183 | 12559 | 10511 | 7796  | 9576  | 5913  | 3153  | 2800  | 2989  | 2239  | 4453  | 6223  | 7430  | 4265  | 19064 | 10478 | 12384 | Hmga2  |        |
| Hmgb1  | 26150 | 17244 | 27746 | 21482 | 17392 | 20961 | 23191 | 29990 | 25738 | 25111 | 24941 | 33006 | 33140 | 35326 | 24586 | 22506 | 20531 | 19175 | 20427 | 28438 | 18964 | 22586 | 26433 | 28683 | 28246 | 44125 | 36678 | 35339 | Hmgb1  |        |
| Hmgb2  | 20159 | 19232 | 26155 | 19295 | 14223 | 17056 | 19762 | 24730 | 22874 | 22340 | 20874 | 34427 | 29130 | 40192 | 20892 | 17243 | 21529 | 15417 | 18711 | 22893 | 17982 | 16115 | 19533 | 30824 | 26066 | 46248 | 37809 | 41314 | Hmgb2  |        |
| Hmgb3  | 14572 | 13755 | 16810 | 15116 | 14207 | 15556 | 16477 | 20250 | 17159 | 19390 | 16649 | 26070 | 22769 | 28332 | 14984 | 12709 | 15662 | 13291 | 15401 | 16755 | 15708 | 18700 | 15488 | 23517 | 22869 | 30494 | 26884 | 28227 | Hmgb3  |        |
| Hmgb4  | 1     | 0     | 0     | 0     | 0     | 0     | 0     | 1     | 1     | 0     | 0     | 0     | 0     | 0     | 1     | 0     | 0     | 0     | 0     | 0     | 0     | 2     | 0     | 0     | 1     | 0     | 0     | 0     | Hmgb4  |        |
| Hmgcl  | 2611  | 3265  | 3036  | 2813  | 2317  | 2620  | 2615  | 1165  | 1472  | 1338  | 1458  | 1439  | 1279  | 1490  | 2378  | 3016  | 2866  | 2915  | 2506  | 2330  | 2592  | 1345  | 1423  | 1518  | 1382  | 1483  | 1427  | 1486  | Hmgcl  |        |
| Hmgcl1 | 569   | 532   | 593   | 580   | 908   | 768   | 907   | 1933  | 1626  | 1823  | 1489  | 1721  | 1598  | 1703  | 762   | 583   | 621   | 666   | 742   | 883   | 778   | 2358  | 1531  | 1640  | 1932  | 1652  | 1670  | 1691  | Hmgcl1 |        |
| Hmgcr  | 25100 | 28218 | 23000 | 23227 | 20076 | 22025 | 24055 | 22280 | 18402 | 18194 | 16476 | 21590 | 21383 | 24145 | 26703 | 24017 | 23008 | 23071 | 20591 | 23976 | 22563 | 19502 | 17129 | 18917 | 21762 | 19010 | 24634 | 24404 | Hmgcr  |        |
| Hmgcs1 | 48992 | 54488 | 57148 | 51671 | 49139 | 48707 | 51419 | 44781 | 35608 | 37607 | 33524 | 45963 | 47175 | 49537 | 54268 | 51072 | 54001 | 49164 | 45586 | 52602 | 47740 | 40503 | 33778 | 39339 | 42640 | 44211 | 52801 | 52677 | Hmgcs1 |        |
| Hmgcs2 | 257   | 241   | 220   | 192   | 465   | 311   | 239   | 556   | 808   | 538   | 723   | 387   | 634   | 393   | 293   | 308   | 148   | 316   | 260   | 420   | 292   | 770   | 1036  | 333   | 465   | 243   | 431   | 389   | Hmgcs2 |        |
| Hmgcn1 | 31661 | 25780 | 31088 | 26340 | 22808 | 23860 | 25786 | 29703 | 25870 | 27814 | 27434 | 33394 | 30550 | 33985 | 29715 | 26003 | 29251 | 25211 | 25476 | 25984 | 23815 | 25217 | 25347 | 33064 | 29125 | 39730 | 33865 | 34803 | Hmgcn1 |        |
| Hmgcn2 | 30238 | 25703 | 30186 | 23172 | 20675 | 24012 | 28455 | 33895 | 32145 | 31097 | 30540 | 42381 | 36855 | 45215 | 28710 | 25220 | 26480 | 21421 | 24157 | 26518 | 25857 | 27718 | 31739 | 37444 | 33265 | 54905 | 44010 | 47841 | Hmgcn2 |        |
| Hmgcn3 | 5511  | 4441  | 5537  | 5298  | 5105  | 4919  | 6389  | 3640  | 3148  | 3451  | 3038  | 3401  | 3151  | 4022  | 5504  | 4547  | 5057  | 5283  | 5444  | 6073  | 5919  | 2836  | 3185  | 3759  | 3483  | 4678  | 3493  | 3814  | Hmgcn3 |        |
| Hmgcn5 | 6374  | 5009  | 9370  | 7297  | 5854  | 6734  | 7897  | 4748  | 3695  | 4927  | 3532  | 6037  | 4899  | 7126  | 7097  | 5629  | 8456  | 6764  | 7208  | 7886  | 6807  | 3606  | 3586  | 5985  | 5194  | 7698  | 6256  | 6640  | Hmgcn5 |        |
| Hmgbx3 | 3805  | 4159  | 4338  | 4507  | 4275  | 3986  | 3816  | 3269  | 3591  | 3911  | 3832  | 4023  | 3828  | 3730  | 3465  | 3994  | 4614  | 4387  | 4563  | 3505  | 4190  | 4040  | 3469  | 3832  | 4002  | 3691  | 3870  | 4010  | Hmgbx3 |        |
| Hmgbx4 | 3549  | 2683  | 3040  | 2813  | 2933  | 3008  | 3245  | 5965  | 5436  | 4781  | 5121  | 5587  | 5376  | 5883  | 3268  | 2644  | 2796  | 2586  | 2998  | 3371  | 2929  | 5041  | 5032  | 5176  | 5029  | 6097  | 5836  | 5809  | Hmgbx4 |        |
| Hmmr   | 5976  | 4741  | 5270  | 3635  | 2906  | 3715  | 4041  | 5517  | 4662  | 4093  | 3980  | 6126  | 5110  | 6424  | 5496  | 4857  | 4595  | 3355  | 4039  | 4753  | 3685  | 3245  | 4369  | 5275  | 4093  | 6688  | 6623  | 6363  | Hmmr   |        |
| Hmox1  | 1539  | 1694  | 1627  | 1119  | 1122  | 1226  | 1052  | 850   | 1183  | 815   | 1133  | 841   | 1052  | 822   | 1483  | 1685  | 1263  | 1226  | 1095  | 1230  | 1000  | 817   | 1573  | 849   | 775   | 946   | 803   | 770   | Hmox1  |        |
| Hmox2  | 4263  | 4181  | 3731  | 3768  | 3579  | 3877  | 3786  | 3844  | 3586  | 3260  | 3528  | 3219  | 3379  | 3380  | 4639  | 3964  | 3680  | 3735  | 3755  | 4087  | 3873  | 3283  | 3943  | 3455  | 3389  | 3891  | 3402  | 3501  | Hmox2  |        |
| Hmx1   | 123   | 172   | 69    | 58    | 88    | 84    | 19    | 167   | 206   | 124   | 320   | 26    | 249   | 21    | 178   | 160   | 88    | 133   | 30    | 23    | 13    | 206   | 219   | 87    | 113   | 73    | 41    | 34    | Hmx1   |        |
| Hmx2   | 63    | 77    | 80    | 79    | 125   | 91    | 80    | 111   | 161   | 185   | 157   | 110   | 98    | 148   | 127   | 60    | 66    | 87    | 97    | 76    | 89    | 194   | 121   | 123   | 159   | 128   | 110   | 89    | Hmx2   |        |
| Hmx3   | 42    | 35    | 21    | 22    | 65    | 39    | 41    | 67    | 79    | 111   | 91    | 64    | 37    | 74    | 75    | 30    | 67    | 41    | 28    | 26    | 47    | 82    | 81    | 83    | 74    | 114   | 40    | 26    | Hmx3   |        |
| Hnf1a  | 1     | 0     | 0     | 1     | 7     | 0     | 0     | 6     | 1     | 0     | 8     | 0     | 1     | 0     | 0     | 0     | 0     | 0     | 1     | 0     | 0     | 2     | 0     | 0     | 0     | 0     | 0     | 0     | Hnf1a  |        |
| Hnf1b  | 2     | 4     | 10    | 8     | 2     | 0     | 1     | 4     | 7     | 5     | 1     | 5     | 2     | 4     | 0     | 4     | 2     | 0     | 3     | 0     | 3     | 3     | 8     | 1     | 5     | 3     | 0     | 0     | Hnf1b  |        |
| Hnf4a  | 0     | 2     | 0     | 0     | 0     | 1     | 0     | 0     | 6     | 0     | 1     | 0     | 0     | 0     | 0     | 2     | 0     | 0     | 0     | 0     | 0     | 0     | 0     | 4     | 0     | 4     | 0     | 1     | Hnf4a  |        |
| Hnf4g  | 7     | 3     | 0     | 1     | 2     | 4     | 4     | 5     | 6     | 3     | 0     | 0     | 1     | 7     | 1     | 4     | 6     | 3     | 11    | 2     | 2     | 5     | 4     | 2     | 0     | 3     | 1     | 9     | Hnf4g  |        |
| Hnmt   | 51    | 35    | 50    | 39    | 71    | 73    | 77    | 92    | 97    | 115   | 112   | 94    | 104   | 69    | 46    | 51    | 74    | 53    | 44    | 61    | 73    | 145   | 123   | 87    | 90    | 99    | 91    | 81    |        |        |

|         |       |       |       |       |       |       |       |       |       |       |       |       |       |       |       |       |       |       |       |       |       |       |       |       |       |       |       |       |         |        |        |
|---------|-------|-------|-------|-------|-------|-------|-------|-------|-------|-------|-------|-------|-------|-------|-------|-------|-------|-------|-------|-------|-------|-------|-------|-------|-------|-------|-------|-------|---------|--------|--------|
| Hormad2 | 8     | 8     | 7     | 13    | 4     | 10    | 10    | 2     | 8     | 8     | 3     | 11    | 7     | 10    | 16    | 16    | 8     | 13    | 7     | 5     | 10    | 13    | 11    | 2     | 17    | 0     | 9     | 11    | Hormad2 |        |        |
| Hoxa1   | 48    | 79    | 68    | 13    | 70    | 39    | 7     | 57    | 64    | 41    | 112   | 60    | 95    | 36    | 98    | 93    | 19    | 48    | 14    | 7     | 2     | 27    | 115   | 35    | 20    | 7     | 51    | 43    | Hoxa1   |        |        |
| Hoxa10  | 1     | 0     | 1     | 0     | 0     | 0     | 0     | 0     | 0     | 0     | 8     | 0     | 0     | 0     | 0     | 0     | 0     | 0     | 0     | 0     | 0     | 0     | 3     | 0     | 0     | 0     | 0     | 0     | 0       | Hoxa10 |        |
| Hoxa11  | 0     | 1     | 0     | 0     | 0     | 0     | 0     | 0     | 0     | 0     | 0     | 0     | 0     | 0     | 0     | 0     | 0     | 0     | 0     | 0     | 0     | 0     | 1     | 0     | 0     | 0     | 0     | 0     | 0       | Hoxa11 |        |
| Hoxa13  | 14    | 7     | 10    | 9     | 1     | 5     | 4     | 1     | 0     | 0     | 2     | 3     | 3     | 3     | 9     | 6     | 0     | 4     | 6     | 10    | 1     | 0     | 1     | 4     | 0     | 0     | 0     | 0     | 0       | Hoxa13 |        |
| Hoxa2   | 8     | 46    | 9     | 3     | 251   | 57    | 0     | 308   | 396   | 445   | 754   | 12    | 634   | 9     | 162   | 74    | 14    | 28    | 13    | 1     | 0     | 366   | 722   | 11    | 38    | 0     | 7     | 5     | Hoxa2   |        |        |
| Hoxa3   | 2     | 8     | 6     | 0     | 457   | 18    | 1     | 241   | 361   | 797   | 1214  | 25    | 316   | 17    | 96    | 30    | 2     | 4     | 4     | 4     | 0     | 404   | 819   | 28    | 10    | 0     | 22    | 24    | Hoxa3   |        |        |
| Hoxa4   | 0     | 2     | 6     | 0     | 318   | 6     | 0     | 60    | 178   | 495   | 512   | 0     | 26    | 2     | 13    | 0     | 3     | 1     | 1     | 0     | 4     | 149   | 438   | 0     | 1     | 0     | 0     | 4     | Hoxa4   |        |        |
| Hoxa5   | 2     | 3     | 2     | 0     | 1630  | 6     | 1     | 35    | 180   | 1195  | 1892  | 1     | 3     | 3     | 4     | 2     | 10    | 2     | 6     | 2     | 0     | 53    | 1591  | 9     | 2     | 0     | 0     | 1     | Hoxa5   |        |        |
| Hoxa6   | 0     | 0     | 0     | 0     | 281   | 2     | 0     | 0     | 2     | 102   | 316   | 0     | 0     | 0     | 0     | 0     | 0     | 0     | 10    | 0     | 0     | 2     | 200   | 0     | 3     | 0     | 0     | 0     | 0       | Hoxa6  |        |
| Hoxa7   | 6     | 5     | 7     | 13    | 38    | 4     | 6     | 1     | 5     | 13    | 440   | 0     | 3     | 0     | 3     | 8     | 5     | 8     | 5     | 2     | 1     | 2     | 21    | 4     | 0     | 1     | 0     | 0     | 0       | Hoxa7  |        |
| Hoxa9   | 0     | 1     | 1     | 2     | 0     | 4     | 3     | 0     | 2     | 1     | 95    | 2     | 0     | 0     | 0     | 2     | 0     | 0     | 0     | 0     | 0     | 0     | 10    | 0     | 0     | 2     | 0     | 0     | 0       | Hoxa9  |        |
| Hoxb1   | 1     | 1     | 2     | 0     | 24    | 2     | 0     | 1     | 1     | 1     | 25    | 0     | 11    | 0     | 12    | 23    | 0     | 1     | 0     | 0     | 0     | 3     | 9     | 0     | 0     | 0     | 0     | 0     | 6       | Hoxb1  |        |
| Hoxb13  | 0     | 0     | 1     | 0     | 0     | 0     | 0     | 0     | 0     | 0     | 0     | 2     | 0     | 0     | 0     | 0     | 0     | 0     | 0     | 0     | 0     | 2     | 1     | 0     | 0     | 0     | 0     | 0     | 0       | Hoxb13 |        |
| Hoxb2   | 2     | 16    | 5     | 6     | 325   | 28    | 0     | 293   | 283   | 415   | 826   | 15    | 532   | 7     | 88    | 55    | 8     | 20    | 6     | 0     | 0     | 359   | 590   | 10    | 50    | 2     | 8     | 5     | Hoxb2   |        |        |
| Hoxb3   | 0     | 10    | 4     | 3     | 1845  | 21    | 1     | 1007  | 1259  | 2369  | 3394  | 5     | 1025  | 1     | 253   | 29    | 12    | 19    | 9     | 2     | 0     | 1561  | 2403  | 4     | 44    | 2     | 1     | 2     | Hoxb3   |        |        |
| Hoxb4   | 6     | 10    | 20    | 2     | 742   | 7     | 2     | 56    | 209   | 734   | 1051  | 3     | 43    | 2     | 62    | 7     | 9     | 10    | 10    | 12    | 11    | 137   | 656   | 1     | 0     | 4     | 3     | 6     | Hoxb4   |        |        |
| Hoxb5   | 0     | 1     | 1     | 0     | 1293  | 0     | 0     | 18    | 147   | 1549  | 1737  | 3     | 0     | 0     | 0     | 0     | 1     | 0     | 0     | 0     | 0     | 57    | 1106  | 0     | 5     | 0     | 0     | 0     | 0       | Hoxb5  |        |
| Hoxb6   | 0     | 0     | 0     | 0     | 497   | 0     | 0     | 0     | 2     | 245   | 1043  | 0     | 0     | 0     | 0     | 0     | 0     | 0     | 0     | 0     | 0     | 0     | 612   | 0     | 0     | 2     | 0     | 0     | 0       | Hoxb6  |        |
| Hoxb7   | 3     | 3     | 0     | 1     | 191   | 0     | 0     | 0     | 1     | 23    | 425   | 0     | 0     | 0     | 0     | 1     | 3     | 9     | 2     | 0     | 2     | 0     | 150   | 0     | 0     | 0     | 0     | 1     | 0       | Hoxb7  |        |
| Hoxb8   | 1     | 2     | 0     | 1     | 764   | 2     | 1     | 1     | 2     | 287   | 2837  | 1     | 0     | 0     | 0     | 3     | 1     | 2     | 2     | 1     | 1     | 0     | 847   | 0     | 0     | 0     | 1     | 4     | 0       | Hoxb8  |        |
| Hoxb9   | 2     | 3     | 1     | 3     | 98    | 4     | 3     | 4     | 8     | 8     | 1892  | 3     | 7     | 6     | 1     | 2     | 0     | 1     | 4     | 0     | 3     | 0     | 32    | 5     | 1     | 15    | 0     | 12    | 0       | Hoxb9  |        |
| Hoxc10  | 0     | 0     | 0     | 0     | 0     | 0     | 1     | 0     | 0     | 0     | 0     | 1     | 0     | 1     | 0     | 0     | 0     | 0     | 0     | 0     | 0     | 0     | 0     | 0     | 0     | 0     | 0     | 0     | 0       | 0      | Hoxc10 |
| Hoxc12  | 1     | 1     | 0     | 0     | 0     | 1     | 0     | 0     | 2     | 0     | 0     | 0     | 2     | 1     | 1     | 2     | 0     | 2     | 0     | 0     | 0     | 0     | 1     | 0     | 0     | 0     | 0     | 0     | 0       | 0      | Hoxc12 |
| Hoxc13  | 17    | 8     | 11    | 5     | 9     | 16    | 6     | 29    | 31    | 11    | 17    | 13    | 19    | 13    | 9     | 9     | 12    | 15    | 10    | 5     | 2     | 0     | 36    | 15    | 5     | 0     | 15    | 12    | 0       | Hoxc13 |        |
| Hoxc4   | 0     | 6     | 5     | 0     | 918   | 10    | 1     | 76    | 218   | 814   | 1251  | 3     | 44    | 4     | 7     | 2     | 2     | 11    | 2     | 1     | 2     | 202   | 731   | 3     | 7     | 0     | 2     | 2     | 0       | Hoxc4  |        |
| Hoxc5   | 1     | 6     | 0     | 0     | 358   | 0     | 0     | 57    | 95    | 506   | 796   | 4     | 24    | 13    | 1     | 2     | 0     | 9     | 2     | 1     | 1     | 37    | 600   | 21    | 5     | 0     | 7     | 11    | 0       | Hoxc5  |        |
| Hoxc6   | 1     | 2     | 0     | 0     | 74    | 2     | 2     | 0     | 1     | 18    | 456   | 0     | 0     | 0     | 0     | 0     | 0     | 0     | 0     | 0     | 0     | 0     | 50    | 2     | 1     | 0     | 0     | 0     | 0       | Hoxc6  |        |
| Hoxc8   | 0     | 1     | 0     | 4     | 0     | 0     | 2     | 0     | 3     | 0     | 533   | 3     | 0     | 2     | 0     | 3     | 0     | 0     | 0     | 0     | 0     | 0     | 7     | 2     | 3     | 1     | 0     | 0     | 0       | Hoxc8  |        |
| Hoxc9   | 0     | 0     | 0     | 0     | 1     | 1     | 0     | 0     | 0     | 0     | 21    | 0     | 0     | 0     | 0     | 0     | 0     | 0     | 0     | 0     | 0     | 0     | 1     | 0     | 0     | 0     | 0     | 0     | 0       | Hoxc9  |        |
| Hoxd1   | 141   | 65    | 29    | 67    | 122   | 107   | 6     | 126   | 256   | 100   | 197   | 53    | 94    | 67    | 79    | 65    | 42    | 186   | 9     | 20    | 4     | 134   | 159   | 150   | 133   | 8     | 36    | 34    | 0       | Hoxd1  |        |
| Hoxd10  | 0     | 1     | 0     | 0     | 0     | 2     | 0     | 1     | 1     | 0     | 0     | 0     | 1     | 0     | 0     | 0     | 0     | 0     | 0     | 0     | 3     | 0     | 3     | 0     | 0     | 0     | 0     | 0     | 0       | Hoxd10 |        |
| Hoxd11  | 0     | 0     | 0     | 0     | 0     | 1     | 0     | 0     | 0     | 0     | 0     | 0     | 0     | 0     | 0     | 0     | 0     | 0     | 0     | 0     | 0     | 0     | 0     | 0     | 0     | 0     | 0     | 0     | 0       | Hoxd11 |        |
| Hoxd13  | 0     | 6     | 16    | 14    | 14    | 8     | 3     | 12    | 10    | 12    | 10    | 8     | 16    | 4     | 4     | 13    | 17    | 22    | 7     | 12    | 6     | 13    | 6     | 5     | 9     | 0     | 1     | 0     | 0       | Hoxd13 |        |
| Hoxd3   | 0     | 3     | 3     | 1     | 492   | 11    | 0     | 305   | 360   | 547   | 767   | 2     | 282   | 5     | 116   | 12    | 0     | 13    | 2     | 1     | 0     | 428   | 543   | 25    | 12    | 0     | 0     | 0     | 0       | Hoxd3  |        |
| Hoxd4   | 5     | 3     | 2     | 3     | 155   | 15    | 0     | 26    | 54    | 90    | 295   | 7     | 26    | 5     | 12    | 3     | 3     | 9     | 2     | 6     | 0     | 23    | 155   | 5     | 4     | 3     | 2     | 1     | 0       | Hoxd4  |        |
| Hoxd8   | 65    | 18    | 34    | 14    | 13    | 81    | 9     | 118   | 225   | 137   | 355   | 53    | 60    | 45    | 30    | 34    | 25    | 145   | 30    | 26    | 13    | 38    | 315   | 166   | 81    | 15    | 35    | 28    | 0       | Hoxd8  |        |
| Hoxd9   | 5     | 1     | 3     | 0     | 2     | 15    | 0     | 5     | 24    | 2     | 29    | 7     | 9     | 2     | 4     | 2     | 0     | 21    | 5     | 3     | 1     | 0     | 46    | 15    | 13    | 0     | 0     | 4     | 0       | Hoxd9  |        |
| Hp      | 5     | 3     | 1     | 5     | 2     | 9     | 8     | 1     | 19    | 25    | 32    | 11    | 27    | 1     | 9     | 12    | 7     | 7     | 6     | 0     | 1     | 5     | 40    | 8     | 6     | 27    | 8     | 6     | 0       | Hp     |        |
| Hp1bp3  | 14981 | 13503 | 14113 | 13900 | 15657 | 15752 | 15759 | 27553 | 25239 | 26427 | 24939 | 28480 | 25722 | 30380 | 14652 | 12738 | 14422 | 14098 | 15176 | 15337 | 15966 | 27222 | 24078 | 28668 | 28408 | 27913 | 27485 | 28766 | 0       | Hp1bp3 |        |
| Hpca    | 353   | 550   | 474   | 809   | 1445  | 1012  | 1148  | 609   | 868   | 846   | 846   | 554   | 476   | 461   | 500   | 371   | 634   | 1094  | 1246  | 1066  | 1180  | 962   | 805   | 775   | 1058  | 431   | 378   | 405   | 0       | Hpca   |        |
| Hpca1   | 2571  | 3065  | 2433  | 2729  | 2626  | 2226  | 2258  | 1462  | 1638  | 1554  | 1447  | 1389  | 1477  | 1330  | 2525  | 2796  | 2593  | 2633  | 2382  | 2450  | 2329  | 1389  | 1647  | 1385  | 1318  | 1442  | 1305  | 1423  | 0       | Hpca1  |        |
| Hpca4   | 338   | 396   | 379   | 622   | 1093  | 802   | 919   | 435   | 538   | 592   | 478   | 245   | 206   | 279   | 447   | 286   | 502   | 683   | 1008  | 853   | 942   | 810   | 544   | 399   | 608   | 169   | 170   | 234   | 0       | Hpca4  |        |
| Hpd     | 0     | 0     | 0     | 0     | 0     | 0     | 0     | 0     | 0     | 0     | 0     | 0     | 0     | 0     | 0     | 0     | 0     | 0     | 0     | 0     | 0     | 0     | 0     | 0     | 0     | 0     | 0     | 0     | 0       | Hpd    |        |
| Hpd1    | 89    | 131   | 89    | 70    | 67    | 69    | 58    | 20    | 43    | 43    | 29    | 25    | 45    | 35    | 69    | 78    | 89    | 53    | 65    | 86    | 61    | 13    | 27    | 27    | 23    | 41    | 27    | 23    | 0       | Hpd1   |        |
| Hpf1    | 5104  | 3889  | 5464  | 4661  | 4056  | 4326  | 5197  | 4715  | 4138  | 4065  | 4373  | 5149  | 4689  | 5600  | 4954  | 4315  | 4589  | 4240  | 4108  | 5033  | 4653  | 4005  | 3880  | 4790  | 4723  | 5551  | 5246  | 5793  | 0       | Hpf1   |        |
| Hpgd    | 717   | 360   | 321   | 242   | 268   | 402   | 203   | 712   | 756   | 554   | 525   | 383   | 641   | 289   | 479   | 525   | 224   | 251   | 242   | 234   | 195   | 520   | 1023  | 443   | 285   | 560   | 395   | 337   | 0       | Hpgd   |        |
| Hpgds   | 483   | 544   | 577   | 522   | 452   | 507   | 350   | 706   | 630   | 524   | 600   | 782   | 1012  | 690   | 554   | 702   | 662   | 459   | 402   | 620   | 350   | 734   | 823   | 604   | 637   | 588   | 839   | 749   | 0       | Hpgds  |        |
| Hpn     | 63    | 44    | 27    | 32    | 29    | 53    | 10    | 37    | 82    | 82    | 78    | 49    | 67    | 14    | 58    | 60    | 34    | 35    | 23    | 21    | 11    | 32    | 85    | 58    | 30    | 77    | 37    | 28    | 0       | Hpn    |        |
| Hprt    | 3015  | 2354  | 3058  | 2885  | 3009  | 2807  | 3363  | 2491  | 2314  | 2268  | 2587  | 2427  | 2431  | 2574  | 3132  | 2921  | 2803  | 2963  | 2862  | 3412  | 3037  | 2413  | 2501  | 2374  | 2361  | 3004  | 2396  | 2598  | 0       | Hprt   |        |
| Hps1    | 955   | 1292  | 1218  | 1279  | 1337  | 1393  | 1294  | 1327  | 1657  | 1896  | 1647  | 2014  | 1683  | 1739  | 907   | 1135  | 1420  | 1289  | 1327  | 1031  | 1205  | 1897  | 1480  | 1822  | 1710  | 1751  | 1640  | 1698  | 0       | Hps1   |        |
| Hps3    | 2821  | 2686  | 2347  | 2472  | 2313  | 2406  | 2571  | 2158  | 1705  | 1607  | 1659  | 1756  | 1924  | 1861  | 2968  | 2769  | 2202  | 2573  | 2159  | 2579  | 2560  | 2080  | 1799  | 1616  | 1794  | 1692  | 1749  | 1651  | 0       | Hps3   |        |
| Hps4    | 2623  | 3524  | 3151  | 3562  | 2777  | 2679  | 2759  | 2039  | 2304  | 2390  | 2311  | 2309  | 2293  | 2039  | 2669  | 3328  | 3705  | 3339  | 3181  | 2508  | 2824  | 2483  | 2193  | 2321  | 2454  | 2180  | 2264  | 2149  | 0       | Hps4   |        |
| Hps5    | 4669  | 4702  | 4232  | 4685  | 4172  | 4298  | 4412  | 3584  | 3633  | 3390  | 3694  | 3645  | 3664  | 3589  | 4627  | 4777  | 4291  | 4787  | 4197  | 4022  | 4294  | 3664  | 3430  | 3755  | 3595  | 3176  | 3627  | 3786  | 0       | Hps5   |        |
| Hps6    | 415   | 523   | 566   | 494   | 433   | 416   | 288   | 128   | 211   | 218   | 214   | 152   | 195   | 122   | 347   | 560   | 492   | 443   | 476   | 324   | 341   | 179   | 227   | 173   | 159   | 204   | 156   | 138   | 0       | Hps6   |        |
| Hpse    | 150   | 100   | 94    | 88    | 59    | 113   | 47    | 140   | 163   | 150   | 175   | 123   | 137   | 100   | 119   | 125   | 97    | 128   | 57    | 65    |       |       |       |       |       |       |       |       |         |        |        |



|          |        |        |        |        |        |        |        |        |        |        |        |        |        |        |        |        |        |        |        |        |        |        |        |        |        |        |        |        |          |         |
|----------|--------|--------|--------|--------|--------|--------|--------|--------|--------|--------|--------|--------|--------|--------|--------|--------|--------|--------|--------|--------|--------|--------|--------|--------|--------|--------|--------|--------|----------|---------|
| Hs6st1   | 7011   | 9512   | 10772  | 11717  | 11233  | 9671   | 8499   | 5056   | 5235   | 6883   | 6389   | 6635   | 6400   | 6110   | 7460   | 8604   | 11305  | 11611  | 10518  | 7260   | 9502   | 7972   | 5482   | 6684   | 6807   | 5722   | 5779   | 6461   | Hs6st1   |         |
| Hs6st2   | 2553   | 1884   | 1660   | 2304   | 3016   | 2857   | 3121   | 3392   | 3477   | 3290   | 3900   | 3107   | 2875   | 3061   | 2316   | 2156   | 1810   | 2466   | 2703   | 2855   | 2955   | 3551   | 3869   | 3322   | 3629   | 3541   | 2802   | 2781   | Hs6st2   |         |
| Hs6st3   | 54     | 71     | 33     | 146    | 229    | 194    | 139    | 162    | 158    | 202    | 177    | 101    | 113    | 81     | 69     | 58     | 79     | 164    | 149    | 195    | 212    | 199    | 184    | 117    | 216    | 4      | 56     | 58     | Hs6st3   |         |
| Hsbp1    | 8338   | 9088   | 9157   | 9227   | 9429   | 8630   | 9759   | 9395   | 8409   | 9495   | 8416   | 8376   | 8282   | 9596   | 9121   | 8062   | 9387   | 9264   | 9372   | 10569  | 9861   | 9336   | 8738   | 9141   | 9162   | 8711   | 8365   | 9016   | Hsbp1    |         |
| Hsbp11   | 13     | 13     | 29     | 11     | 16     | 4      | 13     | 26     | 23     | 30     | 20     | 15     | 20     | 18     | 13     | 34     | 20     | 19     | 17     | 15     | 22     | 20     | 16     | 23     | 35     | 17     | 17     | 15     | Hsbp11   |         |
| Hscb     | 546    | 539    | 617    | 518    | 394    | 394    | 398    | 269    | 284    | 295    | 273    | 298    | 318    | 339    | 473    | 492    | 545    | 481    | 417    | 462    | 437    | 206    | 328    | 305    | 274    | 385    | 344    | 377    | Hscb     |         |
| Hsd11b1  | 9      | 8      | 2      | 6      | 2      | 3      | 6      | 4      | 3      | 3      | 11     | 5      | 3      | 1      | 5      | 13     | 2      | 14     | 5      | 2      | 8      | 10     | 13     | 5      | 1      | 4      | 1      | 0      | Hsd11b1  |         |
| Hsd11b2  | 414    | 592    | 869    | 417    | 400    | 393    | 341    | 541    | 433    | 549    | 438    | 954    | 916    | 943    | 485    | 505    | 765    | 330    | 429    | 367    | 294    | 658    | 548    | 653    | 592    | 992    | 1058   | 1065   | Hsd11b2  |         |
| Hsd17b1  | 17     | 73     | 47     | 87     | 78     | 56     | 49     | 23     | 23     | 38     | 8      | 16     | 16     | 15     | 59     | 57     | 82     | 133    | 63     | 60     | 57     | 30     | 19     | 16     | 30     | 16     | 16     | 9      | Hsd17b1  |         |
| Hsd17b10 | 4617   | 4273   | 4233   | 3559   | 3269   | 3721   | 3295   | 3969   | 4209   | 3782   | 3999   | 3811   | 4188   | 3957   | 4102   | 4175   | 4025   | 3462   | 3709   | 4243   | 3480   | 2988   | 4370   | 3930   | 3579   | 4980   | 4221   | 4328   | Hsd17b10 |         |
| Hsd17b11 | 693    | 577    | 869    | 688    | 708    | 653    | 643    | 845    | 1022   | 959    | 1171   | 681    | 824    | 753    | 708    | 781    | 581    | 678    | 596    | 571    | 602    | 902    | 1187   | 963    | 760    | 971    | 694    | 676    | Hsd17b11 |         |
| Hsd17b12 | 7444   | 6489   | 7018   | 6463   | 5893   | 5728   | 6631   | 7166   | 6258   | 5614   | 5469   | 6030   | 5947   | 6956   | 7387   | 6585   | 6557   | 6104   | 6093   | 6979   | 6391   | 6025   | 6354   | 6178   | 5905   | 6921   | 6501   | 6834   | Hsd17b12 |         |
| Hsd17b13 | 9      | 2      | 3      | 2      | 0      | 2      | 0      | 2      | 2      | 1      | 3      | 0      | 3      | 0      | 0      | 5      | 1      | 0      | 1      | 1      | 0      | 0      | 1      | 2      | 0      | 0      | 2      | 1      | Hsd17b13 |         |
| Hsd17b14 | 17     | 7      | 10     | 6      | 7      | 2      | 2      | 6      | 24     | 13     | 34     | 4      | 14     | 2      | 5      | 25     | 9      | 7      | 16     | 0      | 5      | 12     | 11     | 8      | 13     | 17     | 7      | 6      | Hsd17b14 |         |
| Hsd17b2  | 0      | 0      | 0      | 0      | 1      | 1      | 0      | 1      | 7      | 12     | 2      | 0      | 0      | 0      | 0      | 1      | 1      | 0      | 0      | 1      | 0      | 0      | 1      | 0      | 0      | 0      | 7      | 3      | 2        | Hsd17b2 |
| Hsd17b3  | 17     | 18     | 18     | 4      | 3      | 13     | 13     | 20     | 12     | 12     | 13     | 38     | 29     | 30     | 9      | 13     | 14     | 9      | 21     | 20     | 12     | 23     | 5      | 22     | 14     | 41     | 36     | 44     | Hsd17b3  |         |
| Hsd17b4  | 9490   | 9114   | 9373   | 8297   | 7927   | 7760   | 7968   | 7266   | 6975   | 7284   | 6686   | 7819   | 7673   | 7877   | 9152   | 9120   | 9025   | 8299   | 8292   | 7794   | 7968   | 6676   | 7435   | 7648   | 7037   | 8579   | 8106   | 8184   | Hsd17b4  |         |
| Hsd17b6  | 0      | 0      | 0      | 0      | 0      | 0      | 2      | 2      | 2      | 0      | 8      | 0      | 0      | 0      | 0      | 0      | 0      | 0      | 0      | 0      | 0      | 2      | 6      | 4      | 0      | 5      | 0      | 0      | Hsd17b6  |         |
| Hsd17b7  | 4774   | 4570   | 4285   | 4272   | 3404   | 3937   | 3543   | 2235   | 2011   | 1983   | 1916   | 2135   | 2546   | 2334   | 4824   | 5077   | 3996   | 4210   | 3137   | 3544   | 3550   | 1898   | 1952   | 1763   | 1927   | 1997   | 2650   | 2428   | Hsd17b7  |         |
| Hsd3b1   | 23     | 22     | 7      | 0      | 0      | 3      | 6      | 6      | 7      | 3      | 3      | 25     | 66     | 18     | 17     | 3      | 2      | 7      | 2      | 12     | 2      | 0      | 14     | 5      | 10     | 24     | 30     | 49     | Hsd3b1   |         |
| Hsd3b2   | 0      | 0      | 0      | 0      | 0      | 0      | 0      | 0      | 0      | 0      | 0      | 0      | 0      | 0      | 0      | 0      | 0      | 0      | 0      | 0      | 0      | 0      | 1      | 0      | 0      | 0      | 0      | 0      | Hsd3b2   |         |
| Hsd3b3   | 0      | 0      | 0      | 0      | 0      | 1      | 0      | 2      | 0      | 0      | 0      | 0      | 0      | 0      | 0      | 0      | 0      | 0      | 0      | 0      | 0      | 0      | 0      | 0      | 0      | 0      | 1      | 0      | Hsd3b3   |         |
| Hsd3b6   | 870    | 1304   | 861    | 681    | 245    | 476    | 495    | 672    | 854    | 493    | 440    | 613    | 2591   | 1012   | 1080   | 1119   | 661    | 430    | 394    | 716    | 206    | 297    | 834    | 391    | 439    | 937    | 1052   | 2255   | Hsd3b6   |         |
| Hsd3b7   | 69     | 71     | 82     | 101    | 68     | 57     | 107    | 45     | 70     | 45     | 44     | 65     | 44     | 85     | 54     | 61     | 97     | 99     | 79     | 63     | 99     | 72     | 53     | 76     | 92     | 73     | 69     | 69     | Hsd3b7   |         |
| Hsd1     | 6138   | 7400   | 7134   | 8643   | 9515   | 8438   | 8543   | 5952   | 5516   | 6607   | 5415   | 6089   | 5236   | 5704   | 6879   | 6020   | 8129   | 9172   | 9939   | 8426   | 8880   | 7229   | 5569   | 6381   | 7382   | 5575   | 5684   | 5554   | Hsd1     |         |
| Hsd2     | 5087   | 4594   | 5005   | 4906   | 4357   | 4161   | 4510   | 2477   | 2188   | 2067   | 2085   | 2004   | 2147   | 2153   | 5466   | 4781   | 4879   | 4787   | 4156   | 4950   | 4597   | 2065   | 2262   | 1938   | 1987   | 2031   | 2035   | 2201   | Hsd2     |         |
| Hsf1     | 2279   | 3131   | 2961   | 2899   | 2822   | 2553   | 2551   | 2699   | 3080   | 3350   | 3218   | 3396   | 3057   | 3044   | 2190   | 2673   | 3264   | 3086   | 3215   | 2444   | 2744   | 3166   | 2982   | 3449   | 3191   | 3828   | 2880   | 3077   | Hsf1     |         |
| Hsf2     | 9569   | 8201   | 8908   | 9935   | 9637   | 9593   | 11451  | 11086  | 7751   | 7885   | 7442   | 9929   | 9643   | 10969  | 9981   | 8452   | 8920   | 9400   | 9637   | 10285  | 11147  | 9421   | 7625   | 8331   | 9296   | 8527   | 10402  | 11275  | Hsf2     |         |
| Hsf2bp   | 17     | 26     | 25     | 10     | 11     | 12     | 11     | 16     | 26     | 26     | 19     | 47     | 32     | 32     | 20     | 19     | 24     | 23     | 12     | 17     | 19     | 25     | 32     | 16     | 23     | 30     | 30     | 31     | Hsf2bp   |         |
| Hsf3     | 20     | 6      | 11     | 3      | 2      | 6      | 0      | 16     | 6      | 7      | 12     | 4      | 18     | 3      | 5      | 12     | 0      | 1      | 7      | 5      | 4      | 12     | 10     | 9      | 2      | 9      | 5      | 9      | Hsf3     |         |
| Hsf4     | 12     | 13     | 21     | 21     | 34     | 29     | 12     | 10     | 7      | 8      | 13     | 21     | 8      | 7      | 18     | 16     | 19     | 24     | 26     | 3      | 16     | 23     | 12     | 5      | 10     | 10     | 6      | 5      | Hsf4     |         |
| Hsf5     | 40     | 32     | 47     | 59     | 39     | 39     | 56     | 39     | 21     | 23     | 36     | 46     | 16     | 34     | 50     | 27     | 54     | 46     | 50     | 48     | 50     | 42     | 24     | 31     | 24     | 31     | 36     | 23     | Hsf5     |         |
| Hsh2d    | 36     | 31     | 42     | 47     | 29     | 31     | 15     | 1      | 2      | 10     | 5      | 5      | 5      | 6      | 29     | 37     | 37     | 29     | 37     | 5      | 19     | 7      | 3      | 7      | 5      | 15     | 6      | 4      | Hsh2d    |         |
| Hsp90a1  | 96005  | 88377  | 106246 | 85128  | 80048  | 79025  | 98694  | 111856 | 89032  | 82009  | 78422  | 98944  | 90917  | 105642 | 111188 | 93946  | 96437  | 83520  | 83970  | 104939 | 88816  | 91001  | 89799  | 90626  | 87677  | 106991 | 105930 | 108956 | Hsp90a1  |         |
| Hsp90a1b | 171157 | 173241 | 206219 | 175467 | 157062 | 158678 | 170765 | 152109 | 167473 | 174680 | 170818 | 204833 | 188495 | 212739 | 161258 | 172237 | 189938 | 166388 | 176894 | 147066 | 167261 | 169952 | 166389 | 199281 | 183284 | 242929 | 195973 | 223492 | Hsp90a1b |         |
| Hsp90b1  | 61696  | 49831  | 57075  | 44895  | 34946  | 36557  | 45207  | 48586  | 43255  | 41354  | 45592  | 38750  | 42796  | 45178  | 59597  | 55499  | 50832  | 45090  | 38982  | 41594  | 40213  | 42870  | 45888  | 44431  | 36826  | 45045  | 41916  | 46512  | Hsp90b1  |         |
| Hspa12a  | 6346   | 6878   | 5364   | 7566   | 11373  | 8214   | 8522   | 6804   | 6414   | 6663   | 6571   | 4856   | 6860   | 4879   | 8225   | 7555   | 7078   | 8525   | 8179   | 8215   | 9150   | 8794   | 5779   | 4844   | 6821   | 2885   | 4644   | 4524   | Hspa12a  |         |
| Hspa12b  | 962    | 1090   | 1144   | 716    | 651    | 923    | 478    | 1470   | 1859   | 1650   | 2272   | 1519   | 2167   | 1298   | 961    | 1287   | 957    | 759    | 573    | 487    | 462    | 1425   | 2210   | 1725   | 1337   | 1740   | 1768   | 1616   | Hspa12b  |         |
| Hspa13   | 9105   | 7749   | 7409   | 7646   | 7627   | 7782   | 8834   | 8684   | 7800   | 5970   | 6716   | 6783   | 6397   | 7066   | 9860   | 8639   | 7260   | 8216   | 7426   | 9538   | 8400   | 7352   | 7210   | 6276   | 6680   | 6425   | 7093   | 7017   | Hspa13   |         |
| Hspa14   | 6057   | 5808   | 5178   | 5012   | 3670   | 4235   | 5075   | 3076   | 2900   | 2728   | 2741   | 3256   | 3044   | 3544   | 5466   | 5153   | 5078   | 4836   | 4046   | 4654   | 4362   | 2553   | 2764   | 3057   | 2612   | 3931   | 3309   | 3592   | Hspa14   |         |
| Hspa1a   | 406    | 553    | 447    | 511    | 387    | 309    | 286    | 56     | 81     | 77     | 73     | 45     | 82     | 48     | 310    | 438    | 475    | 526    | 381    | 319    | 287    | 85     | 113    | 95     | 63     | 49     | 36     | 45     | Hspa1a   |         |
| Hspa1b   | 618    | 852    | 930    | 857    | 650    | 515    | 489    | 101    | 176    | 111    | 144    | 94     | 124    | 77     | 603    | 724    | 844    | 938    | 697    | 559    | 493    | 127    | 228    | 143    | 107    | 112    | 98     | 115    | Hspa1b   |         |
| Hspa1f   | 29     | 36     | 42     | 52     | 39     | 27     | 29     | 10     | 11     | 12     | 22     | 11     | 7      | 7      | 28     | 35     | 41     | 36     | 40     | 30     | 55     | 10     | 16     | 16     | 9      | 5      | 13     | 15     | Hspa1f   |         |
| Hspa2    | 1407   | 2141   | 2246   | 1949   | 1429   | 1435   | 1471   | 232    | 272    | 254    | 293    | 285    | 325    | 246    | 1427   | 1854   | 2176   | 1907   | 1678   | 1370   | 1541   | 277    | 334    | 259    | 285    | 276    | 280    | 248    | Hspa2    |         |
| Hspa4    | 40997  | 37094  | 43804  | 39203  | 36889  | 37253  | 42693  | 31414  | 27493  | 29554  | 28082  | 33520  | 31208  | 36259  | 40923  | 36377  | 42198  | 39752  | 38072  | 36918  | 40510  | 29086  | 27119  | 31846  | 30036  | 33658  | 33655  | 35835  | Hspa4    |         |
| Hspa4f   | 799    | 327    | 300    | 290    | 299    | 352    | 302    | 440    | 224    | 161    | 351    | 226    | 231    | 347    | 559    | 440    | 283    | 792    | 361    | 741    | 301    | 371    | 287    | 395    | 182    | 267    | 310    | 170    | Hspa4f   |         |
| Hspa5    | 53318  | 52609  | 54958  | 43728  | 32028  | 32875  | 35197  | 47809  | 44199  | 41709  | 50588  | 36855  | 41764  | 38420  | 52909  | 54252  | 47503  | 44120  | 36423  | 41150  | 32643  | 41883  | 46016  | 45405  | 38184  | 45401  | 41097  | 42058  | Hspa5    |         |
| Hspa8    | 114426 | 132005 | 128970 | 111950 | 107713 | 98773  | 117895 | 156864 | 141174 | 125518 | 127078 | 116459 | 117598 | 128027 | 118158 | 113366 | 127547 | 111802 | 133105 | 121506 | 122102 | 131077 | 143144 | 135992 | 133383 | 137604 | 128610 | 136669 | Hspa8    |         |
| Hspa9    | 28005  | 24258  | 27531  | 24237  | 21561  | 23403  | 25349  | 22810  | 19861  | 20258  | 20672  | 24013  | 21897  | 25823  | 26791  | 23018  | 24671  | 23320  | 23643  | 23449  | 24742  | 20299  | 19680  | 22538  | 21539  | 27043  | 24818  | 25897  | Hspa9    |         |
| Hsbp1    | 309    | 384    | 348    | 190    | 137    | 300    | 122    | 289    | 480    | 258    | 738    | 209    | 319    | 172    | 301    | 3      |        |        |        |        |        |        |        |        |        |        |        |        |          |         |

|               |       |       |       |       |       |       |       |       |       |       |       |       |       |       |       |       |       |       |       |       |       |       |       |       |       |       |       |       |               |               |
|---------------|-------|-------|-------|-------|-------|-------|-------|-------|-------|-------|-------|-------|-------|-------|-------|-------|-------|-------|-------|-------|-------|-------|-------|-------|-------|-------|-------|-------|---------------|---------------|
| Htr7          | 42    | 61    | 38    | 76    | 180   | 71    | 111   | 129   | 157   | 192   | 312   | 88    | 94    | 99    | 50    | 46    | 87    | 103   | 101   | 63    | 99    | 217   | 234   | 98    | 163   | 69    | 69    | 62    | Htr7          |               |
| Htra1         | 911   | 1020  | 774   | 744   | 772   | 1235  | 591   | 526   | 943   | 683   | 1263  | 420   | 665   | 458   | 944   | 1113  | 599   | 1169  | 664   | 532   | 681   | 682   | 1580  | 717   | 789   | 192   | 411   | 443   | Htra1         |               |
| Htra2         | 2856  | 3710  | 3640  | 3522  | 3014  | 2884  | 2984  | 1583  | 1856  | 2078  | 2037  | 2081  | 1986  | 2142  | 2662  | 3035  | 3713  | 3162  | 3192  | 2746  | 3012  | 1693  | 1915  | 2261  | 2053  | 2425  | 2062  | 2103  | Htra2         |               |
| Htra3         | 254   | 343   | 306   | 326   | 464   | 400   | 265   | 277   | 435   | 446   | 633   | 495   | 371   | 411   | 194   | 235   | 306   | 392   | 407   | 233   | 310   | 558   | 584   | 443   | 564   | 336   | 351   | 392   | Htra3         |               |
| Htra4         | 8     | 4     | 1     | 9     | 7     | 1     | 9     | 16    | 16    | 8     | 22    | 1     | 0     | 1     | 1     | 11    | 2     | 3     | 2     | 9     | 17    | 13    | 8     | 9     | 13    | 9     | 0     | 1     | Htra4         |               |
| Htt           | 9827  | 9858  | 5485  | 7690  | 8909  | 9954  | 9302  | 8841  | 8976  | 8196  | 9107  | 8516  | 8749  | 8742  | 9155  | 9655  | 6264  | 7859  | 7763  | 9050  | 10285 | 7279  | 8540  | 6191  | 9362  | 5026  | 9704  | 7809  | Htt           |               |
| Hunk          | 2989  | 2585  | 3423  | 2873  | 3540  | 3228  | 3232  | 4091  | 5035  | 5117  | 4922  | 5396  | 5040  | 5343  | 2525  | 2823  | 3177  | 2979  | 3677  | 2545  | 3055  | 4089  | 4594  | 5609  | 5147  | 6090  | 4896  | 5302  | Hunk          |               |
| Hus1          | 2539  | 2436  | 2455  | 2122  | 1864  | 2076  | 2160  | 2507  | 2265  | 2078  | 2171  | 2760  | 2566  | 2758  | 2403  | 2189  | 2394  | 1888  | 1972  | 2173  | 2006  | 1895  | 2142  | 2277  | 2102  | 2918  | 2915  | 2820  | Hus1          |               |
| Hus1b         | 2     | 3     | 4     | 1     | 0     | 3     | 6     | 4     | 7     | 3     | 2     | 4     | 9     | 4     | 5     | 0     | 0     | 9     | 5     | 2     | 4     | 2     | 4     | 5     | 2     | 2     | 3     | 1     | Hus1b         |               |
| Huwe1         | 50712 | 47487 | 29161 | 38227 | 45015 | 53687 | 48496 | 60037 | 67206 | 52893 | 56758 | 53410 | 53577 | 55297 | 49402 | 49043 | 33011 | 36740 | 39876 | 47167 | 54440 | 42737 | 54587 | 40227 | 58525 | 31850 | 64979 | 45560 | Huwe1         |               |
| Hvcn1         | 189   | 167   | 220   | 115   | 118   | 144   | 77    | 388   | 444   | 346   | 399   | 551   | 556   | 516   | 157   | 179   | 158   | 105   | 161   | 140   | 101   | 296   | 464   | 399   | 275   | 626   | 733   | 615   | Hvcn1         |               |
| Hyal1         | 516   | 623   | 549   | 466   | 382   | 404   | 363   | 274   | 293   | 293   | 341   | 346   | 349   | 311   | 422   | 607   | 547   | 420   | 432   | 332   | 384   | 256   | 351   | 390   | 310   | 387   | 411   | 338   | Hyal1         |               |
| Hyal2         | 2538  | 3450  | 2957  | 2495  | 2362  | 2346  | 1912  | 2970  | 3286  | 2930  | 2781  | 3364  | 3174  | 2972  | 2531  | 2820  | 2812  | 2484  | 2894  | 2466  | 2151  | 2764  | 3441  | 2919  | 2827  | 3847  | 3619  | 2957  | Hyal2         |               |
| Hyal3         | 46    | 79    | 43    | 79    | 74    | 45    | 47    | 45    | 47    | 53    | 55    | 47    | 44    | 48    | 58    | 51    | 43    | 52    | 46    | 54    | 55    | 50    | 60    | 39    | 69    | 62    | 37    | 37    | Hyal3         |               |
| Hyal5         | 0     | 0     | 0     | 0     | 0     | 0     | 0     | 0     | 0     | 0     | 0     | 0     | 0     | 0     | 0     | 0     | 0     | 0     | 0     | 0     | 0     | 0     | 0     | 1     | 0     | 0     | 0     | 0     | Hyal5         |               |
| Hyal6         | 1     | 2     | 0     | 0     | 2     | 0     | 0     | 0     | 0     | 0     | 0     | 0     | 0     | 2     | 1     | 0     | 0     | 0     | 0     | 0     | 0     | 0     | 0     | 0     | 3     | 0     | 0     | 0     | Hyal6         |               |
| Hydin         | 134   | 140   | 42    | 110   | 154   | 203   | 106   | 167   | 216   | 96    | 152   | 141   | 194   | 92    | 120   | 205   | 57    | 88    | 105   | 181   | 133   | 107   | 319   | 86    | 145   | 66    | 114   | 68    | Hydin         |               |
| Hykk          | 1706  | 1628  | 1633  | 1525  | 1345  | 1368  | 1263  | 744   | 778   | 831   | 1009  | 696   | 923   | 751   | 1601  | 1997  | 1533  | 1418  | 1182  | 1308  | 1172  | 834   | 856   | 694   | 698   | 796   | 876   | 849   | Hykk          |               |
| Hyu1          | 3092  | 2688  | 2739  | 2895  | 2577  | 2698  | 2893  | 2722  | 2231  | 2029  | 1797  | 2326  | 2258  | 2623  | 3018  | 2665  | 2530  | 2676  | 2495  | 3037  | 2749  | 2065  | 2065  | 2107  | 2133  | 2396  | 2603  | 2460  | Hyu1          |               |
| Hyo11         | 6050  | 18347 | 20400 | 14883 | 14681 | 14808 | 14393 | 9785  | 10342 | 11467 | 12063 | 11174 | 11546 | 10968 | 15207 | 17569 | 20312 | 18525 | 16781 | 13114 | 14932 | 11418 | 9901  | 12522 | 11203 | 11839 | 11427 | 12067 | Hyo11         |               |
| Hypk          | 624   | 676   | 411   | 626   | 477   | 587   | 581   | 336   | 318   | 305   | 297   | 331   | 330   | 402   | 506   | 559   | 523   | 584   | 451   | 537   | 581   | 311   | 293   | 311   | 328   | 273   | 320   | 352   | Hypk          |               |
| IOC0044D17Rik | 0     | 0     | 0     | 2     | 1     | 1     | 1     | 0     | 0     | 0     | 0     | 0     | 2     | 2     | 0     | 0     | 0     | 0     | 1     | 0     | 1     | 0     | 0     | 0     | 0     | 0     | 0     | 0     | 0             | IOC0044D17Rik |
| I830077J02Rik | 35    | 25    | 66    | 27    | 45    | 36    | 37    | 42    | 40    | 71    | 73    | 52    | 73    | 69    | 29    | 48    | 25    | 22    | 28    | 48    | 32    | 67    | 76    | 61    | 36    | 82    | 38    | 56    | I830077J02Rik |               |
| lah1          | 1664  | 1722  | 1680  | 1590  | 1467  | 1419  | 1533  | 1325  | 1293  | 1182  | 1297  | 1415  | 1338  | 1378  | 1549  | 1650  | 1553  | 1481  | 1488  | 1491  | 1471  | 1180  | 1328  | 1435  | 1273  | 1387  | 1449  | 1434  | lah1          |               |
| lapp          | 8     | 12    | 18    | 0     | 9     | 11    | 7     | 7     | 2     | 8     | 5     | 3     | 22    | 19    | 9     | 9     | 25    | 6     | 2     | 18    | 4     | 3     | 3     | 9     | 5     | 3     | 16    | 28    | lapp          |               |
| lars          | 16168 | 16726 | 14519 | 12671 | 11051 | 12295 | 12226 | 10535 | 10174 | 9405  | 9658  | 12825 | 11420 | 13103 | 15191 | 14308 | 13822 | 12145 | 11790 | 11589 | 11856 | 9379  | 9314  | 10794 | 11027 | 12180 | 12821 | 14158 | lars          |               |
| lars2         | 4421  | 4026  | 3706  | 3349  | 3069  | 3355  | 3543  | 4377  | 4364  | 3769  | 3748  | 4387  | 4143  | 4163  | 4090  | 3727  | 3321  | 3147  | 3021  | 3510  | 3304  | 3790  | 4117  | 3908  | 3931  | 4372  | 4406  | 4323  | lars2         |               |
| lbsa7         | 198   | 254   | 289   | 372   | 376   | 321   | 297   | 625   | 771   | 819   | 746   | 886   | 823   | 748   | 222   | 238   | 349   | 261   | 411   | 313   | 318   | 810   | 723   | 780   | 983   | 748   | 862   | 758   | lbsa7         |               |
| lbsp          | 3     | 3     | 7     | 6     | 11    | 87    | 20    | 131   | 302   | 376   | 279   | 8     | 7     | 12    | 5     | 9     | 0     | 232   | 3     | 5     | 9     | 515   | 553   | 150   | 623   | 5     | 1     | 1     | lbsp          |               |
| lbtk          | 5410  | 4276  | 4810  | 4404  | 5332  | 5348  | 5194  | 8248  | 7889  | 7550  | 7900  | 8348  | 8490  | 8403  | 5147  | 4892  | 4663  | 4528  | 5032  | 5212  | 4918  | 7879  | 7821  | 7670  | 7982  | 6817  | 8542  | 8175  | lbtk          |               |
| lca1          | 646   | 633   | 614   | 665   | 975   | 729   | 705   | 1112  | 1098  | 1242  | 1052  | 749   | 874   | 856   | 717   | 758   | 633   | 690   | 767   | 802   | 754   | 1206  | 1144  | 945   | 1025  | 830   | 774   | 757   | lca1          |               |
| lca11         | 130   | 159   | 120   | 270   | 695   | 490   | 542   | 888   | 979   | 1132  | 939   | 570   | 560   | 634   | 215   | 169   | 226   | 403   | 427   | 503   | 541   | 1348  | 971   | 687   | 1027  | 383   | 497   | 527   | lca11         |               |
| lcam1         | 642   | 660   | 542   | 416   | 313   | 481   | 298   | 274   | 419   | 304   | 508   | 290   | 392   | 295   | 584   | 812   | 447   | 624   | 296   | 283   | 296   | 286   | 542   | 297   | 296   | 321   | 274   | 301   | lcam1         |               |
| lcam2         | 205   | 174   | 135   | 144   | 187   | 170   | 113   | 319   | 407   | 421   | 412   | 278   | 369   | 298   | 116   | 207   | 129   | 147   | 168   | 193   | 162   | 281   | 527   | 378   | 246   | 455   | 287   | 336   | lcam2         |               |
| lcam4         | 9     | 14    | 41    | 1     | 2     | 1     | 4     | 2     | 6     | 1     | 0     | 9     | 29    | 18    | 8     | 17    | 10    | 6     | 3     | 2     | 4     | 0     | 4     | 16    | 5     | 13    | 15    | 66    | lcam4         |               |
| lcam5         | 240   | 295   | 245   | 248   | 164   | 166   | 123   | 15    | 14    | 25    | 18    | 4     | 5     | 7     | 152   | 271   | 170   | 246   | 139   | 164   | 131   | 10    | 16    | 12    | 11    | 16    | 5     | 5     | lcam5         |               |
| lce1          | 15043 | 16203 | 10891 | 14573 | 16535 | 16617 | 16075 | 15961 | 15815 | 15349 | 15790 | 14127 | 14072 | 13732 | 14968 | 14985 | 12758 | 15042 | 15101 | 15411 | 16373 | 15308 | 15166 | 12353 | 16464 | 8076  | 14145 | 12589 | lce1          |               |
| lce2          | 1977  | 1621  | 1750  | 1428  | 1351  | 1433  | 1672  | 3220  | 3083  | 2318  | 2448  | 2690  | 2637  | 2595  | 2064  | 1872  | 1728  | 1221  | 1512  | 1824  | 1536  | 2129  | 2966  | 2365  | 2250  | 2406  | 2639  | 2572  | lce2          |               |
| lcm1          | 5114  | 5529  | 5676  | 5401  | 4829  | 4798  | 4126  | 3579  | 3814  | 3846  | 3940  | 4108  | 3967  | 3406  | 4588  | 5605  | 5373  | 5406  | 4827  | 4484  | 4364  | 3588  | 3662  | 3957  | 4008  | 3733  | 3871  | 3764  | lcm1          |               |
| lcos          | 1     | 4     | 5     | 0     | 4     | 0     | 0     | 7     | 7     | 10    | 16    | 8     | 7     | 3     | 8     | 3     | 0     | 2     | 1     | 4     | 3     | 7     | 5     | 7     | 0     | 8     | 7     | 2     | lcos          |               |
| lcos1         | 270   | 255   | 357   | 204   | 190   | 195   | 177   | 140   | 179   | 119   | 176   | 173   | 166   | 162   | 270   | 360   | 220   | 215   | 163   | 180   | 138   | 110   | 186   | 134   | 100   | 197   | 166   | 166   | lcos1         |               |
| ld1           | 1666  | 1980  | 1665  | 1273  | 982   | 1026  | 529   | 1843  | 2208  | 1852  | 2020  | 1184  | 2244  | 1097  | 1694  | 2231  | 1509  | 1152  | 858   | 867   | 598   | 1457  | 2673  | 1516  | 1108  | 1676  | 1323  | 1380  | ld1           |               |
| ld2           | 4685  | 3936  | 3541  | 2922  | 2912  | 2958  | 2704  | 5699  | 5613  | 4744  | 4709  | 3811  | 4948  | 4097  | 4349  | 4878  | 2780  | 3116  | 2442  | 2901  | 2926  | 4189  | 5934  | 4349  | 3925  | 4076  | 4005  | 4690  | ld2           |               |
| ld3           | 3262  | 3537  | 4080  | 2269  | 1671  | 1821  | 1084  | 3573  | 4033  | 3449  | 4335  | 3447  | 4524  | 3288  | 2668  | 3861  | 2810  | 2028  | 1421  | 1622  | 994   | 2921  | 4762  | 3774  | 2494  | 4662  | 4184  | 4355  | ld3           |               |
| ld4           | 11701 | 9987  | 11464 | 20191 | 22058 | 19702 | 24465 | 22791 | 17115 | 26027 | 19860 | 30158 | 21798 | 33433 | 12864 | 8527  | 16507 | 20778 | 22415 | 20187 | 24570 | 23841 | 16601 | 32038 | 31055 | 32520 | 24076 | 27966 | ld4           |               |
| lde           | 2     | 1     | 0     | 0     | 0     | 0     | 0     | 0     | 0     | 0     | 0     | 0     | 0     | 0     | 0     | 0     | 0     | 0     | 0     | 0     | 0     | 0     | 0     | 0     | 0     | 0     | 0     | 0     | 0             | lde           |
| ldh1          | 18590 | 17602 | 17941 | 18802 | 20918 | 20552 | 22897 | 28482 | 21550 | 21537 | 18957 | 23381 | 22093 | 25740 | 22411 | 17775 | 19520 | 19444 | 21052 | 25243 | 21913 | 25950 | 21854 | 22750 | 24981 | 22984 | 25747 | 26182 | ldh1          |               |
| ldh2          | 9567  | 9986  | 9148  | 8193  | 7333  | 8102  | 7248  | 9492  | 11089 | 9543  | 10388 | 10914 | 10404 | 10182 | 8315  | 9396  | 8321  | 7672  | 8369  | 8523  | 7543  | 8214  | 11328 | 10730 | 9996  | 12690 | 11341 | 10822 | ldh2          |               |
| ldh3a         | 10811 | 10236 | 9624  | 9787  | 8843  | 9085  | 10658 | 5737  | 5167  | 4756  | 4557  | 5118  | 4612  | 5438  | 10205 | 9091  | 9488  | 9993  | 9436  | 10020 | 10395 | 5125  | 5141  | 5159  | 5671  | 5311  | 4882  | 5431  | ldh3a         |               |
| ldh3b         | 7398  | 8187  | 8199  | 7485  | 6862  | 6921  | 7357  | 8004  | 7669  | 7302  | 7507  | 7585  | 7440  | 6850  | 7140  |       |       |       |       |       |       |       |       |       |       |       |       |       |               |               |

|         |      |      |      |      |      |      |      |      |      |      |      |      |      |      |      |      |      |      |      |      |      |      |      |      |      |      |      |      |         |
|---------|------|------|------|------|------|------|------|------|------|------|------|------|------|------|------|------|------|------|------|------|------|------|------|------|------|------|------|------|---------|
| ifi35   | 108  | 122  | 123  | 90   | 91   | 92   | 60   | 96   | 119  | 126  | 152  | 84   | 115  | 98   | 96   | 160  | 80   | 97   | 95   | 128  | 85   | 97   | 165  | 114  | 85   | 124  | 107  | 109  | ifi35   |
| ifi44   | 3    | 3    | 2    | 3    | 2    | 6    | 0    | 55   | 21   | 45   | 57   | 26   | 19   | 21   | 3    | 5    | 7    | 9    | 2    | 28   | 4    | 62   | 63   | 48   | 23   | 40   | 28   | 21   | ifi44   |
| ifi44i  | 0    | 0    | 0    | 0    | 0    | 0    | 0    | 0    | 2    | 0    | 1    | 0    | 0    | 0    | 0    | 0    | 0    | 0    | 0    | 4    | 0    | 0    | 0    | 0    | 0    | 0    | 0    | 0    | ifi44i  |
| ifi47   | 0    | 0    | 0    | 0    | 0    | 0    | 0    | 0    | 0    | 0    | 0    | 0    | 0    | 0    | 0    | 0    | 0    | 0    | 0    | 1    | 0    | 0    | 1    | 1    | 0    | 0    | 0    | 0    | ifi47   |
| ifi1    | 204  | 155  | 163  | 150  | 182  | 200  | 187  | 255  | 234  | 221  | 234  | 229  | 218  | 246  | 208  | 238  | 137  | 158  | 135  | 281  | 196  | 227  | 299  | 202  | 166  | 220  | 231  | 193  | ifi1    |
| ifi1i   | 6    | 4    | 1    | 4    | 2    | 4    | 3    | 16   | 12   | 55   | 22   | 22   | 25   | 43   | 4    | 12   | 9    | 2    | 1    | 25   | 7    | 18   | 34   | 25   | 21   | 25   | 36   | 20   | ifi1i   |
| ifitb1  | 20   | 29   | 28   | 13   | 39   | 13   | 19   | 18   | 35   | 52   | 41   | 10   | 24   | 29   | 21   | 26   | 17   | 12   | 16   | 15   | 12   | 35   | 38   | 17   | 20   | 16   | 15   | 20   | ifitb1  |
| ifitb2  | 18   | 11   | 19   | 6    | 7    | 5    | 9    | 42   | 29   | 14   | 28   | 31   | 36   | 11   | 21   | 25   | 10   | 18   | 5    | 5    | 4    | 40   | 32   | 27   | 17   | 17   | 16   | 14   | ifitb2  |
| ifit    | 662  | 364  | 468  | 381  | 437  | 462  | 484  | 896  | 974  | 803  | 914  | 909  | 829  | 873  | 578  | 474  | 381  | 353  | 478  | 582  | 407  | 732  | 896  | 932  | 816  | 1038 | 803  | 904  | ifit    |
| ifit3   | 15   | 18   | 7    | 8    | 15   | 17   | 12   | 20   | 24   | 39   | 70   | 34   | 37   | 30   | 24   | 8    | 10   | 13   | 11   | 15   | 21   | 52   | 54   | 49   | 36   | 57   | 33   | 28   | ifit3   |
| ifit3b  | 3    | 3    | 0    | 5    | 1    | 1    | 1    | 5    | 11   | 5    | 15   | 5    | 10   | 2    | 4    | 2    | 0    | 1    | 5    | 5    | 4    | 8    | 6    | 6    | 4    | 3    | 2    | 5    | ifit3b  |
| ifitm1  | 166  | 143  | 179  | 115  | 122  | 133  | 63   | 231  | 321  | 227  | 246  | 135  | 220  | 131  | 100  | 200  | 98   | 151  | 80   | 147  | 111  | 155  | 379  | 230  | 88   | 201  | 149  | 166  | ifitm1  |
| ifitm10 | 13   | 14   | 1    | 8    | 13   | 16   | 13   | 6    | 15   | 12   | 20   | 18   | 5    | 12   | 13   | 11   | 13   | 36   | 27   | 18   | 25   | 30   | 21   | 19   | 18   | 12   | 2    | 8    | ifitm10 |
| ifitm2  | 475  | 358  | 232  | 235  | 146  | 136  | 251  | 419  | 451  | 337  | 457  | 185  | 278  | 460  | 386  | 296  | 211  | 160  | 116  | 136  | 212  | 254  | 519  | 387  | 196  | 270  | 195  | 471  | ifitm2  |
| ifitm3  | 231  | 187  | 148  | 187  | 165  | 227  | 142  | 199  | 277  | 304  | 395  | 206  | 264  | 182  | 164  | 263  | 177  | 191  | 157  | 294  | 259  | 251  | 377  | 317  | 223  | 262  | 255  | 197  | ifitm3  |
| ifitm5  | 22   | 19   | 25   | 17   | 7    | 23   | 4    | 7    | 18   | 27   | 37   | 17   | 15   | 7    | 10   | 13   | 31   | 20   | 19   | 7    | 10   | 10   | 5    | 15   | 24   | 16   | 8    | 17   | ifitm5  |
| ifitm6  | 1    | 1    | 0    | 5    | 3    | 0    | 0    | 0    | 2    | 10   | 18   | 3    | 10   | 1    | 0    | 2    | 1    | 0    | 2    | 1    | 5    | 0    | 5    | 4    | 12   | 4    | 8    | 8    | ifitm6  |
| ifitm7  | 25   | 32   | 19   | 6    | 36   | 34   | 21   | 104  | 76   | 74   | 107  | 130  | 143  | 118  | 25   | 21   | 34   | 18   | 39   | 47   | 35   | 85   | 90   | 51   | 76   | 75   | 141  | 109  | ifitm7  |
| ifna11  | 0    | 0    | 0    | 0    | 0    | 0    | 0    | 0    | 0    | 0    | 0    | 0    | 0    | 0    | 0    | 0    | 0    | 0    | 0    | 0    | 0    | 0    | 1    | 0    | 0    | 0    | 0    | 0    | ifna11  |
| ifna12  | 0    | 0    | 0    | 0    | 0    | 0    | 0    | 0    | 0    | 0    | 0    | 0    | 0    | 0    | 0    | 2    | 0    | 0    | 0    | 0    | 0    | 0    | 0    | 0    | 0    | 0    | 0    | 0    | ifna12  |
| ifna16  | 0    | 0    | 0    | 0    | 1    | 0    | 0    | 0    | 0    | 0    | 0    | 0    | 0    | 0    | 0    | 0    | 0    | 0    | 0    | 0    | 0    | 0    | 0    | 0    | 0    | 0    | 0    | 0    | ifna16  |
| ifna2   | 0    | 0    | 2    | 0    | 0    | 0    | 1    | 2    | 0    | 0    | 3    | 0    | 1    | 0    | 0    | 0    | 0    | 0    | 0    | 0    | 0    | 0    | 0    | 0    | 0    | 0    | 0    | 0    | ifna2   |
| ifna7   | 0    | 0    | 0    | 3    | 0    | 0    | 0    | 0    | 0    | 0    | 0    | 0    | 0    | 0    | 0    | 1    | 0    | 0    | 0    | 0    | 0    | 0    | 0    | 0    | 0    | 0    | 0    | 0    | ifna7   |
| ifnab   | 1    | 0    | 0    | 1    | 3    | 0    | 0    | 0    | 0    | 0    | 0    | 0    | 0    | 1    | 0    | 2    | 1    | 0    | 1    | 0    | 2    | 0    | 1    | 1    | 1    | 0    | 1    | 0    | ifnab   |
| ifnar1  | 7359 | 7696 | 5762 | 7052 | 6690 | 7046 | 6683 | 7173 | 7601 | 7083 | 7666 | 7297 | 7514 | 7327 | 7129 | 7256 | 6298 | 6940 | 6443 | 6579 | 6693 | 7061 | 7299 | 6879 | 7646 | 6100 | 7598 | 7122 | ifnar1  |
| ifnar2  | 443  | 381  | 488  | 344  | 439  | 388  | 355  | 854  | 887  | 973  | 1019 | 891  | 913  | 851  | 352  | 384  | 372  | 343  | 413  | 393  | 393  | 904  | 933  | 963  | 900  | 1061 | 883  | 870  | ifnar2  |
| ifng    | 0    | 0    | 0    | 0    | 0    | 0    | 0    | 0    | 0    | 0    | 1    | 0    | 0    | 0    | 0    | 0    | 0    | 0    | 0    | 0    | 0    | 0    | 0    | 0    | 0    | 0    | 0    | 0    | ifng    |
| ifngr1  | 2022 | 1996 | 1712 | 1534 | 1368 | 1386 | 1369 | 1036 | 1135 | 956  | 1193 | 1046 | 1229 | 1046 | 1904 | 2051 | 1737 | 1549 | 1322 | 1518 | 1276 | 1135 | 1340 | 1076 | 903  | 1181 | 1173 | 1156 | ifngr1  |
| ifngr2  | 2594 | 2695 | 2647 | 2925 | 3129 | 2911 | 2979 | 1934 | 2387 | 2203 | 2282 | 1735 | 1909 | 1759 | 2734 | 2974 | 2539 | 2996 | 2949 | 3066 | 3141 | 2115 | 2453 | 2127 | 2422 | 1855 | 1847 | 1879 | ifngr2  |
| ifnrl1  | 287  | 205  | 258  | 179  | 148  | 201  | 171  | 164  | 173  | 226  | 163  | 97   | 127  | 85   | 187  | 234  | 210  | 196  | 196  | 163  | 139  | 100  | 206  | 181  | 63   | 172  | 89   | 88   | ifnrl1  |
| ifnz    | 0    | 3    | 0    | 3    | 0    | 2    | 1    | 0    | 2    | 0    | 0    | 0    | 1    | 0    | 3    | 6    | 0    | 2    | 0    | 2    | 0    | 2    | 1    | 0    | 0    | 0    | 0    | 0    | ifnz    |
| ifrd1   | 4573 | 4166 | 4240 | 4859 | 4327 | 4705 | 5965 | 3972 | 3260 | 3167 | 2962 | 3973 | 3822 | 4674 | 4812 | 3585 | 4561 | 4587 | 4716 | 5065 | 5354 | 3631 | 3225 | 3561 | 3627 | 4400 | 4247 | 4518 | ifrd1   |
| ifrd2   | 1024 | 1164 | 1249 | 1073 | 691  | 741  | 770  | 856  | 1056 | 1002 | 1166 | 1021 | 1388 | 981  | 860  | 1113 | 1129 | 1008 | 809  | 749  | 809  | 714  | 1111 | 1076 | 956  | 1419 | 972  | 1135 | ifrd2   |
| ifrt122 | 1817 | 1965 | 1722 | 1783 | 1775 | 1851 | 1682 | 2876 | 3339 | 3352 | 2928 | 3145 | 3046 | 3001 | 1892 | 1884 | 1861 | 1744 | 1862 | 1700 | 1763 | 3009 | 3149 | 3148 | 3058 | 2884 | 3253 | 2986 | ifrt122 |
| ift140  | 7844 | 8383 | 5706 | 7769 | 7460 | 7810 | 7283 | 4013 | 4761 | 4382 | 4018 | 4561 | 4786 | 4385 | 6902 | 7076 | 6537 | 7594 | 7779 | 7114 | 7805 | 4040 | 4266 | 4202 | 4450 | 3715 | 4664 | 4347 | ift140  |
| ift172  | 5034 | 5801 | 4461 | 5864 | 5515 | 5701 | 5703 | 5051 | 6294 | 6417 | 6410 | 5886 | 6023 | 5497 | 4971 | 5590 | 5203 | 5748 | 5670 | 5075 | 5653 | 5474 | 6100 | 5936 | 6058 | 4413 | 5957 | 5652 | ift172  |
| ift20   | 3656 | 3992 | 3842 | 3953 | 3346 | 3607 | 3701 | 2599 | 2529 | 2306 | 2640 | 2202 | 2324 | 2490 | 3825 | 3829 | 3845 | 4121 | 3471 | 4098 | 3674 | 2336 | 2710 | 2757 | 2678 | 2614 | 2418 | 2544 | ift20   |
| ift22   | 2772 | 3514 | 3151 | 3101 | 2789 | 2925 | 3027 | 2137 | 2174 | 1925 | 1890 | 2346 | 2194 | 2439 | 2937 | 3046 | 3180 | 2881 | 3038 | 3231 | 2975 | 1997 | 2223 | 2236 | 2349 | 2553 | 2464 | 2511 | ift22   |
| ift27   | 2776 | 3844 | 3109 | 3271 | 2995 | 3017 | 3287 | 1699 | 1834 | 1845 | 1840 | 2368 | 2092 | 2253 | 2719 | 2678 | 3401 | 3254 | 3370 | 2952 | 3010 | 1589 | 1710 | 2054 | 2165 | 2667 | 2443 | 2490 | ift27   |
| ift43   | 1314 | 1476 | 1561 | 1479 | 1208 | 1336 | 1321 | 1077 | 1172 | 1292 | 1100 | 1453 | 1505 | 1484 | 1341 | 1163 | 1640 | 1394 | 1433 | 1409 | 1337 | 959  | 1189 | 1393 | 1321 | 1723 | 1507 | 1512 | ift43   |
| ift46   | 5324 | 5795 | 4385 | 4995 | 4793 | 5018 | 5481 | 4631 | 4458 | 4221 | 3959 | 4265 | 3977 | 4443 | 5438 | 4846 | 4876 | 5093 | 5072 | 5342 | 5487 | 4368 | 4450 | 4316 | 4351 | 4330 | 4503 | 4549 | ift46   |
| ift52   | 2504 | 2432 | 2472 | 2033 | 1852 | 2164 | 2162 | 2869 | 2859 | 2911 | 2747 | 3257 | 3178 | 3399 | 2445 | 2211 | 2211 | 1841 | 1931 | 2080 | 2045 | 2637 | 2929 | 2924 | 2759 | 3220 | 3381 | 3538 | ift52   |
| ift57   | 2742 | 2452 | 2675 | 2930 | 2654 | 2483 | 3100 | 1583 | 1503 | 1480 | 1362 | 1487 | 1466 | 1587 | 2807 | 2498 | 2921 | 2834 | 2629 | 2894 | 2759 | 1626 | 1525 | 1496 | 1564 | 1537 | 1396 | 1559 | ift57   |
| ift74   | 6281 | 5254 | 6756 | 5383 | 4619 | 5214 | 5292 | 4799 | 5847 | 3743 | 3465 | 5184 | 4901 | 5227 | 6629 | 5748 | 5991 | 4581 | 5073 | 6267 | 4789 | 3820 | 3893 | 4479 | 3799 | 6016 | 5320 | 5682 | ift74   |
| ift80   | 7101 | 5734 | 5986 | 5432 | 5119 | 5475 | 5843 | 4317 | 3896 | 3366 | 3597 | 3845 | 3809 | 4189 | 6965 | 6316 | 5601 | 5509 | 5344 | 6378 | 5952 | 3233 | 4016 | 3658 | 3236 | 3610 | 4161 | 3926 | ift80   |
| ift81   | 4321 | 3890 | 4436 | 3849 | 4060 | 3848 | 4441 | 5117 | 4264 | 4177 | 3920 | 4217 | 4124 | 4716 | 4704 | 4105 | 4284 | 3855 | 4185 | 4907 | 4086 | 4697 | 4322 | 4260 | 4208 | 4351 | 4610 | 4513 | ift81   |
| ift88   | 3740 | 3333 | 3275 | 3310 | 3301 | 3157 | 3477 | 1826 | 2821 | 2835 | 2998 | 2740 | 3044 | 3113 | 3798 | 3519 | 3174 | 3146 | 3068 | 3597 | 3421 | 2822 | 3077 | 2747 | 2716 | 2823 | 2993 | 3214 | ift88   |
| iftap   | 1742 | 1310 | 1751 | 1384 | 1316 | 1519 | 1616 | 3182 | 2523 | 1330 | 1505 | 1603 | 1609 | 1804 | 2029 | 1710 | 1484 | 1437 | 1320 | 1916 | 1433 | 1504 | 1612 | 1503 | 1364 | 1929 | 1739 | 1804 | iftap   |
| lgbp1   | 4384 | 4085 | 3259 | 3192 | 2965 | 3269 | 3306 | 4316 | 3902 | 3302 | 3250 | 3524 | 3504 | 3650 | 4510 | 3807 | 3262 | 3043 | 3051 | 3807 | 3296 | 3395 | 3967 | 3285 | 3270 | 3643 | 3818 | 3830 | lgbp1   |
| lgbp1b  | 6    | 2    | 0    | 8    | 6    | 5    | 9    | 7    | 6    | 10   | 2    | 10   | 1    | 17   | 0    | 1    | 17   | 7    | 10   | 4    | 6    | 18   | 5    | 9    | 17   | 6    | 9    | 14   | lgbp1b  |
| lgdcc3  | 1179 | 1569 | 3289 | 1537 | 1424 | 1356 | 1210 | 1541 | 1320 | 1967 | 1518 | 3829 | 2918 | 3295 | 1170 | 1304 | 2476 | 1317 | 1781 | 1087 | 1259 | 2079 | 1249 | 2382 | 2186 | 3592 | 4043 | 4211 | lgdcc3  |
| lgdcc4  | 2953 | 2975 | 3513 | 3066 | 3268 | 3858 | 2813 | 4726 | 5699 | 6221 | 7795 | 6218 | 5782 | 5557 | 2930 | 3368 | 3559 | 3526 | 3636 | 2572 | 2792 | 6116 | 6295 | 5661 |      |      |      |      |         |

|         |       |       |       |       |       |       |       |       |       |       |       |       |       |       |       |       |       |       |       |       |       |       |       |       |       |       |       |       |         |
|---------|-------|-------|-------|-------|-------|-------|-------|-------|-------|-------|-------|-------|-------|-------|-------|-------|-------|-------|-------|-------|-------|-------|-------|-------|-------|-------|-------|-------|---------|
| lgsf5   | 2     | 3     | 0     | 3     | 3     | 1     | 0     | 11    | 2     | 0     | 2     | 2     | 1     | 0     | 0     | 0     | 2     | 0     | 1     | 0     | 2     | 7     | 10    | 2     | 0     | 1     | 1     | 2     | lgsf5   |
| lgsf6   | 27    | 38    | 14    | 21    | 11    | 26    | 4     | 53    | 68    | 60    | 85    | 54    | 46    | 51    | 34    | 40    | 13    | 23    | 14    | 21    | 28    | 45    | 88    | 61    | 59    | 50    | 67    | 50    | lgsf6   |
| lgsf8   | 6770  | 10555 | 10120 | 11704 | 9908  | 9458  | 8563  | 4448  | 5019  | 5931  | 5178  | 7288  | 6255  | 6009  | 7561  | 7801  | 12406 | 11137 | 11696 | 8382  | 9167  | 5259  | 4555  | 7309  | 6755  | 7702  | 5836  | 5534  | lgsf8   |
| lgsf9   | 8634  | 11411 | 11767 | 12987 | 12006 | 11478 | 11734 | 7413  | 8309  | 9173  | 7064  | 11373 | 9595  | 9633  | 8020  | 9573  | 12655 | 11954 | 13722 | 10566 | 11228 | 8285  | 7100  | 10782 | 9763  | 10691 | 9681  | 9452  | lgsf9   |
| lgsf9b  | 7609  | 8634  | 7043  | 11329 | 12586 | 11789 | 11931 | 4529  | 4608  | 5414  | 5704  | 5374  | 5670  | 5717  | 7353  | 7872  | 8859  | 11905 | 10899 | 9772  | 12077 | 5466  | 4451  | 4664  | 6562  | 3250  | 5478  | 5085  | lgsf9b  |
| lgtp    | 61    | 60    | 73    | 63    | 40    | 60    | 34    | 126   | 114   | 93    | 141   | 100   | 94    | 110   | 73    | 85    | 51    | 57    | 38    | 93    | 39    | 104   | 124   | 103   | 76    | 175   | 132   | 145   | lgtp    |
| lhh     | 8     | 15    | 17    | 8     | 17    | 10    | 8     | 17    | 17    | 30    | 60    | 21    | 18    | 21    | 5     | 7     | 16    | 7     | 11    | 2     | 11    | 43    | 25    | 41    | 25    | 28    | 23    | 19    | lhh     |
| lho1    | 228   | 190   | 271   | 293   | 197   | 276   | 234   | 132   | 152   | 207   | 170   | 187   | 177   | 175   | 175   | 220   | 205   | 212   | 201   | 229   | 225   | 164   | 170   | 149   | 224   | 147   | 171   | 177   | lho1    |
| lipp1   | 25    | 5     | 7     | 19    | 5     | 9     | 3     | 99    | 40    | 78    | 105   | 31    | 32    | 32    | 21    | 18    | 9     | 9     | 2     | 7     | 1     | 22    | 79    | 93    | 8     | 72    | 22    | 32    | lipp1   |
| lk      | 17507 | 16806 | 18787 | 17032 | 13830 | 14355 | 16213 | 15886 | 13283 | 13712 | 13096 | 13987 | 13311 | 16550 | 18386 | 16163 | 17803 | 15550 | 14821 | 18087 | 15908 | 12995 | 13212 | 14698 | 14066 | 16579 | 14765 | 15902 | lk      |
| lkbip   | 2909  | 2594  | 2775  | 2361  | 1963  | 2299  | 2014  | 1541  | 1821  | 1492  | 2355  | 1339  | 1701  | 1439  | 2966  | 3185  | 2664  | 2480  | 1964  | 2171  | 2040  | 1472  | 2225  | 1443  | 1386  | 1522  | 1447  | 1533  | lkbip   |
| lkbkb   | 8235  | 9944  | 7032  | 8828  | 8434  | 8600  | 8631  | 5882  | 5993  | 6378  | 6000  | 6227  | 5880  | 6325  | 8296  | 8562  | 7617  | 8822  | 8385  | 8519  | 9230  | 5828  | 5595  | 5768  | 6274  | 5063  | 6539  | 5952  | lkbkb   |
| lkbke   | 285   | 324   | 194   | 313   | 286   | 413   | 250   | 260   | 384   | 342   | 549   | 212   | 363   | 244   | 264   | 329   | 299   | 372   | 290   | 267   | 288   | 411   | 520   | 308   | 260   | 194   | 261   | 208   | lkbke   |
| lkbkg   | 3549  | 3200  | 2880  | 2765  | 2720  | 3097  | 3000  | 4222  | 4002  | 3222  | 3584  | 4029  | 4367  | 3904  | 3850  | 3256  | 2721  | 2749  | 2815  | 3298  | 2997  | 3487  | 4030  | 3300  | 3556  | 3629  | 4369  | 4078  | lkbkg   |
| lkzf1   | 159   | 152   | 314   | 206   | 249   | 211   | 185   | 278   | 290   | 340   | 363   | 339   | 395   | 333   | 187   | 207   | 189   | 232   | 219   | 187   | 225   | 394   | 286   | 242   | 280   | 361   | 322   | 428   | lkzf1   |
| lkzf2   | 1529  | 1088  | 1426  | 1469  | 1253  | 1230  | 1248  | 1539  | 1306  | 1031  | 1089  | 917   | 998   | 864   | 1390  | 1280  | 1141  | 1251  | 1257  | 1320  | 1290  | 846   | 1290  | 948   | 833   | 787   | 1017  | 1006  | lkzf2   |
| lkzf3   | 9     | 1     | 0     | 4     | 18    | 4     | 1     | 11    | 30    | 14    | 14    | 1     | 5     | 5     | 9     | 2     | 0     | 2     | 1     | 1     | 6     | 15    | 28    | 12    | 3     | 4     | 3     | 4     | lkzf3   |
| lkzf4   | 1008  | 1016  | 1294  | 1297  | 2181  | 1639  | 1714  | 2096  | 2121  | 2649  | 2391  | 2304  | 2165  | 2358  | 965   | 929   | 1486  | 1509  | 1852  | 1402  | 1731  | 3334  | 1890  | 2506  | 2903  | 1905  | 1890  | 2206  | lkzf4   |
| lkzf5   | 5578  | 4710  | 4478  | 4869  | 4025  | 4728  | 5080  | 4382  | 3849  | 3117  | 3453  | 4157  | 4113  | 4451  | 5542  | 5179  | 4394  | 4533  | 4332  | 4941  | 5024  | 3596  | 3562  | 3731  | 3938  | 3838  | 4371  | 4421  | lkzf5   |
| lI10    | 0     | 0     | 0     | 0     | 0     | 0     | 0     | 0     | 2     | 0     | 2     | 0     | 5     | 1     | 0     | 0     | 0     | 0     | 1     | 1     | 0     | 0     | 1     | 0     | 0     | 3     | 0     | 5     | lI10    |
| lI10a   | 129   | 136   | 149   | 71    | 96    | 96    | 80    | 89    | 99    | 60    | 86    | 78    | 88    | 72    | 96    | 132   | 88    | 127   | 70    | 85    | 69    | 84    | 142   | 74    | 61    | 89    | 80    | 89    | lI10a   |
| lI10b   | 137   | 119   | 147   | 104   | 150   | 127   | 135   | 247   | 246   | 254   | 373   | 250   | 240   | 220   | 164   | 132   | 123   | 102   | 128   | 106   | 105   | 239   | 335   | 254   | 198   | 219   | 250   | 235   | lI10b   |
| lI11    | 28    | 48    | 54    | 44    | 53    | 52    | 51    | 24    | 12    | 27    | 18    | 12    | 11    | 14    | 34    | 37    | 48    | 57    | 35    | 61    | 65    | 18    | 21    | 22    | 37    | 29    | 21    | 9     | lI11    |
| lI11ra1 | 4482  | 4366  | 3677  | 3293  | 2244  | 2929  | 1809  | 2970  | 4087  | 3343  | 4277  | 2112  | 3133  | 1779  | 3775  | 5579  | 3170  | 3660  | 2271  | 2293  | 1863  | 2615  | 4522  | 3084  | 2166  | 3326  | 2069  | 1997  | lI11ra1 |
| lI11ra2 | 12    | 6     | 7     | 24    | 4     | 7     | 3     | 7     | 21    | 7     | 6     | 4     | 2     | 3     | 16    | 16    | 6     | 4     | 3     | 2     | 1     | 10    | 8     | 2     | 4     | 2     | 1     | 6     | lI11ra2 |
| lI12a   | 0     | 1     | 0     | 1     | 0     | 3     | 2     | 0     | 0     | 2     | 4     | 1     | 1     | 0     | 1     | 0     | 2     | 1     | 0     | 4     | 3     | 0     | 3     | 2     | 0     | 0     | 0     | 1     | lI12a   |
| lI12b   | 0     | 3     | 0     | 1     | 4     | 0     | 2     | 0     | 3     | 0     | 0     | 1     | 3     | 0     | 0     | 1     | 0     | 1     | 0     | 0     | 0     | 2     | 1     | 2     | 0     | 0     | 1     | 0     | lI12b   |
| lI12rb1 | 0     | 0     | 3     | 0     | 2     | 3     | 0     | 0     | 0     | 0     | 0     | 0     | 1     | 0     | 1     | 1     | 2     | 0     | 0     | 4     | 0     | 0     | 3     | 1     | 0     | 0     | 0     | 0     | lI12rb1 |
| lI12rb2 | 14    | 12    | 34    | 7     | 4     | 14    | 7     | 24    | 20    | 2     | 15    | 25    | 16    | 12    | 12    | 14    | 19    | 11    | 8     | 10    | 7     | 22    | 17    | 24    | 28    | 17    | 12    | 9     | lI12rb2 |
| lI13    | 1     | 3     | 0     | 0     | 0     | 0     | 0     | 0     | 0     | 0     | 0     | 0     | 1     | 1     | 0     | 0     | 0     | 0     | 0     | 0     | 2     | 0     | 2     | 0     | 0     | 0     | 0     | 0     | lI13    |
| lI13ra1 | 644   | 448   | 452   | 379   | 407   | 377   | 356   | 641   | 775   | 592   | 731   | 432   | 556   | 490   | 642   | 659   | 353   | 380   | 363   | 475   | 332   | 708   | 990   | 624   | 445   | 706   | 474   | 474   | lI13ra1 |
| lI13ra2 | 1     | 1     | 0     | 1     | 6     | 2     | 0     | 5     | 3     | 1     | 3     | 0     | 2     | 3     | 1     | 7     | 2     | 0     | 1     | 3     | 3     | 15    | 8     | 1     | 8     | 0     | 0     | 1     | lI13ra2 |
| lI15    | 78    | 59    | 51    | 37    | 29    | 43    | 40    | 56    | 52    | 22    | 80    | 50    | 42    | 43    | 69    | 67    | 41    | 31    | 31    | 39    | 38    | 53    | 67    | 25    | 18    | 42    | 27    | 43    | lI15    |
| lI15ra  | 60    | 54    | 38    | 45    | 42    | 50    | 40    | 17    | 18    | 17    | 20    | 14    | 20    | 19    | 32    | 58    | 35    | 42    | 63    | 43    | 37    | 42    | 34    | 14    | 23    | 8     | 26    | 12    | lI15ra  |
| lI16    | 80    | 75    | 99    | 39    | 50    | 87    | 46    | 173   | 259   | 173   | 321   | 125   | 179   | 89    | 76    | 97    | 56    | 73    | 62    | 60    | 46    | 135   | 318   | 146   | 136   | 138   | 134   | 119   | lI16    |
| lI17b   | 0     | 0     | 2     | 0     | 8     | 7     | 0     | 4     | 29    | 2     | 210   | 3     | 7     | 0     | 1     | 3     | 3     | 2     | 1     | 5     | 0     | 13    | 113   | 2     | 3     | 2     | 5     | 2     | lI17b   |
| lI17c   | 2     | 10    | 11    | 14    | 7     | 6     | 6     | 5     | 3     | 3     | 4     | 3     | 2     | 6     | 11    | 8     | 10    | 10    | 12    | 21    | 9     | 7     | 3     | 5     | 5     | 10    | 5     | 5     | lI17c   |
| lI17d   | 146   | 139   | 120   | 108   | 149   | 160   | 153   | 226   | 268   | 273   | 337   | 198   | 195   | 220   | 152   | 101   | 124   | 149   | 136   | 111   | 161   | 282   | 321   | 261   | 276   | 203   | 187   | 223   | lI17d   |
| lI17f   | 80    | 79    | 43    | 178   | 66    | 94    | 115   | 20    | 20    | 12    | 17    | 21    | 23    | 38    | 91    | 52    | 82    | 95    | 79    | 78    | 78    | 20    | 19    | 29    | 23    | 34    | 33    | 30    | lI17f   |
| lI17ra  | 2365  | 3149  | 2603  | 3716  | 3233  | 3075  | 2927  | 696   | 862   | 937   | 858   | 873   | 1142  | 834   | 2618  | 3058  | 3121  | 3876  | 2960  | 2498  | 2903  | 787   | 942   | 762   | 807   | 755   | 681   | 751   | lI17ra  |
| lI17rb  | 9     | 4     | 1     | 5     | 12    | 10    | 6     | 12    | 25    | 26    | 12    | 10    | 7     | 0     | 5     | 1     | 2     | 3     | 6     | 5     | 6     | 13    | 10    | 4     | 9     | 5     | 0     | 12    | lI17rb  |
| lI17rc  | 48    | 79    | 61    | 49    | 37    | 41    | 16    | 87    | 140   | 137   | 143   | 83    | 133   | 87    | 69    | 84    | 49    | 36    | 38    | 28    | 32    | 122   | 203   | 103   | 97    | 82    | 101   | 83    | lI17rc  |
| lI17rd  | 9564  | 7896  | 5951  | 7611  | 5761  | 6342  | 5513  | 4081  | 4210  | 4195  | 4925  | 4312  | 5592  | 4191  | 7067  | 9094  | 6830  | 6814  | 5974  | 5784  | 6063  | 3263  | 4188  | 3826  | 3298  | 3820  | 4855  | 4710  | lI17rd  |
| lI17re  | 38    | 21    | 18    | 9     | 11    | 26    | 1     | 101   | 115   | 106   | 64    | 48    | 45    | 28    | 28    | 21    | 3     | 25    | 2     | 6     | 3     | 20    | 139   | 69    | 15    | 41    | 35    | 47    | lI17re  |
| lI18    | 212   | 194   | 295   | 220   | 256   | 339   | 277   | 427   | 324   | 401   | 356   | 582   | 445   | 610   | 252   | 168   | 242   | 217   | 250   | 325   | 239   | 451   | 372   | 369   | 472   | 394   | 601   | 541   | lI18    |
| lI18bp  | 1138  | 1210  | 684   | 949   | 1024  | 990   | 990   | 962   | 896   | 881   | 986   | 832   | 872   | 811   | 1109  | 971   | 880   | 891   | 920   | 1094  | 1068  | 986   | 849   | 805   | 1016  | 753   | 927   | 814   | lI18bp  |
| lI18r1  | 0     | 1     | 0     | 0     | 0     | 0     | 0     | 6     | 13    | 1     | 8     | 0     | 0     | 1     | 1     | 0     | 0     | 2     | 1     | 1     | 0     | 18    | 13    | 3     | 1     | 2     | 0     | 1     | lI18r1  |
| lI18rap | 38    | 17    | 23    | 7     | 18    | 15    | 23    | 34    | 30    | 35    | 63    | 65    | 48    | 55    | 17    | 23    | 9     | 17    | 13    | 16    | 17    | 28    | 50    | 42    | 13    | 90    | 63    | 59    | lI18rap |
| lI19    | 2     | 6     | 6     | 4     | 10    | 1     | 11    | 4     | 9     | 3     | 4     | 0     | 9     | 1     | 4     | 7     | 2     | 14    | 5     | 1     | 5     | 2     | 1     | 5     | 7     | 1     | 0     | 5     | lI19    |
| lI1a    | 3     | 3     | 2     | 5     | 3     | 7     | 6     | 6     | 7     | 9     | 5     | 4     | 7     | 4     | 9     | 3     | 7     | 3     | 1     | 6     | 6     | 10    | 12    | 13    | 7     | 5     | 9     | 8     | lI1a    |
| lI1b    | 0     | 1     | 0     | 0     | 0     | 3     | 1     | 1     | 2     | 3     | 3     | 1     | 1     | 2     | 1     | 0     | 0     | 0     | 2     | 0     | 0     | 2     | 4     | 0     | 3     | 7     | 2     | 7     | lI1b    |
| lI1r1   | 386   | 234   | 228   | 176   | 180   | 292   | 153   | 366   | 461   | 313   | 523   | 240   | 282   | 221   | 318   | 381   | 174   | 265   | 115   | 219   | 165   | 277   | 491   | 331   | 221   | 241   | 292   | 243   | lI1r1   |
| lI1r2   | 14    | 8     | 29    | 11    | 10    | 7     | 6     | 22    | 10    | 13    | 6     | 3     | 18    | 5     | 20    | 18    | 12    | 10    | 4     | 8     | 13    | 10    | 23    | 4     | 7     | 7     | 3     | 5     | lI1r2   |
| lI1rap  | 1762  | 1372  | 1388  | 1080  | 1631  | 1502  | 1352  | 1203  | 103   |       |       |       |       |       |       |       |       |       |       |       |       |       |       |       |       |       |       |       |         |



|        |       |       |       |       |       |       |       |       |       |       |       |       |       |       |       |       |       |       |       |       |       |       |       |       |       |       |       |       |   |
|--------|-------|-------|-------|-------|-------|-------|-------|-------|-------|-------|-------|-------|-------|-------|-------|-------|-------|-------|-------|-------|-------|-------|-------|-------|-------|-------|-------|-------|---|
| ll31   | 0     | 0     | 0     | 0     | 0     | 3     | 0     | 0     | 0     | 0     | 0     | 0     | 1     | 4     | 0     | 1     | 1     | 2     | 0     | 0     | 0     | 0     | 0     | 0     | 2     | ll31  |       |       |   |
| ll31ra | 10    | 1     | 0     | 18    | 18    | 6     | 11    | 17    | 25    | 25    | 22    | 11    | 3     | 16    | 4     | 5     | 6     | 20    | 13    | 28    | 30    | 5     | 38    | 20    | 33    | 3     | 2     | 13    |   |
| ll33   | 88    | 82    | 53    | 48    | 55    | 86    | 61    | 134   | 209   | 93    | 182   | 47    | 90    | 45    | 128   | 101   | 73    | 95    | 48    | 58    | 39    | 170   | 201   | 93    | 101   | 70    | 67    | 84    |   |
| ll34   | 7     | 19    | 14    | 12    | 16    | 9     | 12    | 44    | 54    | 67    | 42    | 29    | 58    | 16    | 11    | 10    | 16    | 14    | 23    | 17    | 27    | 28    | 88    | 41    | 41    | 30    | 46    | 24    |   |
| ll35g  | 0     | 0     | 0     | 0     | 0     | 0     | 0     | 0     | 1     | 0     | 0     | 3     | 1     | 0     | 0     | 0     | 0     | 0     | 0     | 0     | 0     | 0     | 2     | 2     | 0     | 0     | 0     | 0     |   |
| ll36rn | 1     | 0     | 0     | 0     | 0     | 1     | 1     | 4     | 19    | 11    | 18    | 2     | 0     | 7     | 1     | 0     | 0     | 0     | 0     | 1     | 0     | 2     | 15    | 9     | 0     | 4     | 0     | 0     |   |
| ll3ra  | 257   | 327   | 438   | 357   | 290   | 290   | 183   | 232   | 291   | 282   | 277   | 362   | 380   | 254   | 252   | 322   | 351   | 336   | 337   | 263   | 256   | 328   | 282   | 385   | 297   | 335   | 336   | 304   |   |
| ll4    | 1     | 0     | 2     | 2     | 5     | 2     | 0     | 5     | 2     | 3     | 2     | 0     | 1     | 0     | 0     | 1     | 6     | 0     | 4     | 0     | 1     | 0     | 1     | 2     | 2     | 0     | 1     | 4     |   |
| ll41   | 31    | 15    | 31    | 18    | 30    | 18    | 28    | 35    | 23    | 30    | 29    | 29    | 46    | 39    | 29    | 18    | 27    | 37    | 30    | 32    | 25    | 32    | 45    | 34    | 48    | 53    | 31    | 56    |   |
| ll4ra  | 701   | 777   | 836   | 662   | 619   | 605   | 389   | 419   | 587   | 435   | 583   | 446   | 501   | 346   | 711   | 910   | 635   | 636   | 545   | 498   | 423   | 404   | 661   | 449   | 436   | 563   | 585   | 415   |   |
| ll5    | 1     | 2     | 4     | 0     | 4     | 1     | 2     | 5     | 2     | 2     | 2     | 0     | 1     | 1     | 1     | 1     | 0     | 2     | 5     | 4     | 2     | 3     | 1     | 0     | 0     | 0     | 6     | 1     |   |
| ll5ra  | 0     | 0     | 0     | 1     | 2     | 2     | 1     | 0     | 0     | 7     | 0     | 0     | 0     | 0     | 2     | 1     | 0     | 0     | 0     | 0     | 0     | 2     | 4     | 1     | 0     | 0     | 1     | 2     |   |
| ll6    | 8     | 3     | 1     | 8     | 10    | 8     | 13    | 5     | 6     | 5     | 5     | 0     | 1     | 0     | 9     | 5     | 0     | 13    | 12    | 5     | 13    | 5     | 2     | 2     | 0     | 1     | 2     | 0     |   |
| ll6ra  | 80    | 111   | 198   | 113   | 145   | 188   | 129   | 122   | 152   | 139   | 182   | 162   | 149   | 155   | 119   | 139   | 127   | 146   | 140   | 136   | 129   | 164   | 227   | 139   | 183   | 140   | 149   | 115   |   |
| ll6st  | 15402 | 14891 | 12311 | 11876 | 10269 | 11815 | 8752  | 8988  | 10550 | 10036 | 13202 | 9613  | 11872 | 9039  | 14679 | 17531 | 10999 | 12864 | 8886  | 9151  | 9742  | 9832  | 12591 | 9278  | 8169  | 7530  | 10270 | 9428  |   |
| ll7    | 7     | 3     | 7     | 3     | 11    | 6     | 6     | 11    | 7     | 0     | 11    | 0     | 3     | 4     | 9     | 2     | 7     | 3     | 8     | 8     | 10    | 2     | 3     | 11    | 5     | 3     | 27    | 7     | 1 |
| ll7r   | 7     | 2     | 6     | 1     | 6     | 0     | 4     | 10    | 11    | 5     | 30    | 4     | 7     | 3     | 1     | 2     | 0     | 3     | 1     | 0     | 0     | 17    | 26    | 11    | 2     | 11    | 5     | 5     |   |
| ll9r   | 6     | 7     | 17    | 5     | 6     | 6     | 1     | 6     | 7     | 5     | 2     | 1     | 9     | 4     | 1     | 5     | 2     | 1     | 7     | 1     | 1     | 7     | 8     | 4     | 1     | 5     | 5     | 5     |   |
| lldr1  | 70    | 20    | 5     | 26    | 9     | 10    | 4     | 137   | 153   | 175   | 125   | 3     | 31    | 5     | 28    | 37    | 9     | 9     | 0     | 5     | 1     | 30    | 131   | 123   | 19    | 151   | 2     | 2     |   |
| lldr2  | 7081  | 6933  | 9395  | 7782  | 7335  | 8179  | 8303  | 5345  | 4291  | 5073  | 4487  | 9182  | 7483  | 9329  | 7572  | 5882  | 9364  | 7327  | 7924  | 7401  | 8275  | 5945  | 4697  | 5928  | 6532  | 6448  | 10537 | 9862  |   |
| llf2   | 20054 | 18916 | 19907 | 19983 | 18920 | 18908 | 21225 | 22699 | 19366 | 19866 | 18327 | 22537 | 21106 | 24379 | 20054 | 17203 | 19812 | 18735 | 20274 | 20606 | 20922 | 19836 | 18579 | 21692 | 21366 | 24313 | 23140 | 24275 |   |
| llf3   | 13243 | 14239 | 15210 | 14626 | 15653 | 14915 | 15137 | 21415 | 23049 | 23443 | 21933 | 26711 | 24446 | 27560 | 13006 | 11851 | 15579 | 13991 | 16338 | 14540 | 15472 | 21631 | 21010 | 26213 | 26106 | 25929 | 26600 | 27333 |   |
| llk    | 8573  | 9389  | 8608  | 8106  | 7263  | 8049  | 7545  | 6959  | 7552  | 6988  | 7605  | 7053  | 7328  | 7405  | 8412  | 8783  | 8402  | 7931  | 8158  | 7042  | 7973  | 6918  | 8262  | 7199  | 6802  | 8203  | 7299  | 7785  |   |
| llkap  | 6033  | 5813  | 5843  | 5848  | 5262  | 5494  | 5928  | 5891  | 5381  | 5451  | 5617  | 6137  | 5632  | 6058  | 5826  | 5605  | 5822  | 5838  | 5804  | 5666  | 5758  | 5449  | 5488  | 5695  | 5944  | 6175  | 6090  | 6261  |   |
| llrun  | 8067  | 8517  | 9395  | 9119  | 7916  | 7660  | 6817  | 5368  | 6175  | 6734  | 6953  | 6636  | 6783  | 6153  | 7030  | 9091  | 9063  | 8998  | 8567  | 6188  | 7558  | 6191  | 6422  | 7329  | 6965  | 7405  | 6408  | 6424  |   |
| llvbl  | 2308  | 2648  | 2615  | 2805  | 2282  | 2643  | 1973  | 1662  | 1910  | 2006  | 1932  | 1972  | 2137  | 1680  | 2313  | 2443  | 2630  | 2737  | 2602  | 2487  | 2114  | 1865  | 2033  | 1749  | 1892  | 1964  | 2007  | 1692  |   |
| llvbl  | 2707  | 2334  | 2800  | 2475  | 1681  | 1938  | 2727  | 1986  | 1799  | 1716  | 1756  | 1687  | 1661  | 1855  | 2952  | 2453  | 2422  | 2260  | 2502  | 2936  | 2496  | 1480  | 1646  | 1879  | 1685  | 2098  | 1876  | 2135  |   |
| llvbl  | 100   | 104   | 135   | 98    | 106   | 122   | 99    | 131   | 111   | 101   | 95    | 89    | 127   | 94    | 91    | 110   | 90    | 68    | 86    | 107   | 64    | 62    | 107   | 103   | 100   | 111   | 109   | 122   |   |
| llvbl  | 11623 | 10799 | 10522 | 9093  | 8962  | 9375  | 9417  | 12128 | 10925 | 10448 | 10229 | 11205 | 11272 | 11907 | 11815 | 10118 | 9953  | 8868  | 9380  | 10115 | 9698  | 11202 | 10853 | 10579 | 10330 | 11865 | 11617 | 12589 |   |
| llvbl  | 2520  | 2572  | 2030  | 2277  | 1816  | 1821  | 2195  | 1867  | 1683  | 1738  | 1613  | 1630  | 1682  | 1805  | 2305  | 2093  | 2221  | 1913  | 2046  | 2466  | 2139  | 1539  | 1783  | 1910  | 1672  | 1937  | 1741  | 1752  |   |
| llvbl  | 8156  | 8208  | 7546  | 6910  | 5814  | 6349  | 6518  | 4676  | 4462  | 4022  | 4707  | 4719  | 4525  | 4534  | 7878  | 7402  | 6920  | 6913  | 6372  | 6521  | 6379  | 4239  | 4408  | 4401  | 4674  | 4638  | 4525  | 4525  |   |
| llvbl  | 2802  | 2751  | 3056  | 2843  | 2972  | 2683  | 3072  | 4035  | 3339  | 3044  | 3117  | 3279  | 3379  | 3508  | 3301  | 2783  | 3132  | 2881  | 2773  | 3290  | 2942  | 3253  | 3457  | 3401  | 3306  | 3791  | 3477  | 3843  |   |
| llvbl  | 1652  | 1551  | 1669  | 1548  | 1305  | 1324  | 1169  | 451   | 599   | 596   | 768   | 648   | 752   | 655   | 1501  | 1879  | 1528  | 1566  | 1304  | 1026  | 1247  | 461   | 708   | 651   | 543   | 848   | 630   | 646   |   |
| llvbl  | 5426  | 4113  | 5228  | 4387  | 4376  | 4358  | 4212  | 5145  | 4507  | 4667  | 5324  | 5299  | 5367  | 2600  | 5215  | 5322  | 4781  | 4560  | 4074  | 3956  | 3985  | 5559  | 4904  | 4932  | 5063  | 5259  | 5430  | 5413  |   |
| llvbl  | 3038  | 3911  | 4982  | 4436  | 4017  | 3921  | 3513  | 1824  | 2321  | 2623  | 2901  | 2616  | 2503  | 2417  | 3090  | 3537  | 4803  | 4390  | 4394  | 3323  | 3611  | 2750  | 2435  | 2751  | 2607  | 2815  | 2421  | 2528  |   |
| llvbl  | 10659 | 10932 | 10603 | 10209 | 7842  | 8842  | 9505  | 6066  | 7667  | 7129  | 7476  | 8169  | 7725  | 7928  | 8898  | 10530 | 10024 | 10150 | 9297  | 8695  | 9221  | 5543  | 7236  | 8112  | 7106  | 10431 | 7977  | 8974  |   |
| llvbl  | 0     | 0     | 0     | 0     | 0     | 0     | 0     | 0     | 1     | 0     | 2     | 1     | 0     | 0     | 0     | 0     | 0     | 0     | 0     | 1     | 0     | 0     | 0     | 0     | 0     | 0     | 0     | 0     |   |
| llvbl  | 456   | 429   | 351   | 571   | 648   | 586   | 719   | 270   | 253   | 320   | 276   | 193   | 255   | 225   | 462   | 513   | 498   | 677   | 629   | 549   | 651   | 271   | 239   | 265   | 296   | 170   | 228   | 193   |   |
| llvbl  | 21659 | 27414 | 25503 | 44207 | 57355 | 43618 | 42918 | 36032 | 33492 | 45678 | 36126 | 33383 | 39253 | 32215 | 30565 | 25550 | 39456 | 46845 | 47528 | 40823 | 46808 | 58372 | 32312 | 33401 | 43840 | 24335 | 28344 | 30572 |   |
| llvbl  | 1092  | 1202  | 1165  | 1326  | 1343  | 1254  | 1167  | 869   | 940   | 1080  | 1154  | 957   | 937   | 917   | 1125  | 1064  | 1515  | 1332  | 1341  | 1086  | 1260  | 1140  | 962   | 1155  | 1061  | 1042  | 932   | 971   |   |
| llvbl  | 2909  | 3086  | 3663  | 4012  | 3089  | 3204  | 3769  | 1559  | 1336  | 1604  | 1546  | 1804  | 1711  | 2091  | 2851  | 2697  | 3737  | 3805  | 3258  | 3048  | 3732  | 1646  | 1325  | 1849  | 1860  | 1973  | 1722  | 2063  |   |
| llvbl  | 1339  | 1341  | 1532  | 1287  | 1352  | 1236  | 1143  | 1003  | 1185  | 1057  | 997   | 1358  | 1202  | 1172  | 1108  | 1271  | 1560  | 1311  | 1513  | 1108  | 1272  | 876   | 1020  | 1285  | 867   | 1759  | 1345  | 1258  |   |
| llvbl  | 72    | 73    | 93    | 48    | 41    | 49    | 59    | 43    | 43    | 28    | 42    | 47    | 36    | 45    | 78    | 55    | 89    | 68    | 49    | 48    | 67    | 58    | 32    | 25    | 29    | 25    | 56    | 33    |   |
| llvbl  | 7455  | 8656  | 10979 | 9375  | 6640  | 6993  | 7645  | 5655  | 6765  | 7979  | 7329  | 11508 | 9318  | 11509 | 6665  | 8001  | 9740  | 7888  | 8542  | 6318  | 7416  | 5718  | 5919  | 10150 | 8493  | 13621 | 10458 | 11841 |   |
| llvbl  | 1063  | 1292  | 1365  | 1267  | 1379  | 1330  | 1120  | 700   | 1197  | 1271  | 1534  | 1052  | 1208  | 822   | 943   | 1439  | 1166  | 1782  | 1316  | 966   | 1141  | 1036  | 1114  | 1196  | 1267  | 1062  | 932   | 841   |   |
| llvbl  | 5917  | 6293  | 6441  | 6687  | 5875  | 6210  | 6455  | 4846  | 4328  | 4839  | 4431  | 5513  | 4630  | 5647  | 6046  | 5727  | 6426  | 6454  | 6198  | 6027  | 6184  | 4792  | 4311  | 5084  | 5153  | 6315  | 5352  | 5878  |   |
| llvbl  | 1601  | 1570  | 1853  | 1832  | 1522  | 1482  | 1428  | 966   | 839   | 900   | 958   | 991   | 1034  | 1030  | 1576  | 1618  | 1561  | 1577  | 1480  | 1567  | 1440  | 956   | 962   | 936   | 876   | 1093  | 1062  | 1097  |   |
| llvbl  | 2144  | 1999  | 2186  | 2136  | 1557  | 1667  | 2189  | 2694  | 2439  | 2277  | 2229  | 2778  | 2345  | 2775  | 2172  | 1848  | 1982  | 1930  | 1903  | 2104  | 1965  | 2406  | 2251  | 2574  | 2436  | 3060  | 2496  | 2858  |   |
| llvbl  | 163   | 98    | 100   | 166   | 139   | 165   | 179   | 275   | 293   | 352   | 264   | 301   | 308   | 369   | 148   | 155   | 174   | 120   | 154   | 174   | 118   | 286   | 241   | 346   | 336   | 172   | 314   | 292   |   |
| llvbl  | 1163  | 1092  | 1175  | 963   | 985   | 1083  | 1020  | 2341  | 2412  | 2363  | 2399  | 2989  | 2740  | 2944  | 1091  | 1051  | 1274  | 979   | 1086  | 1009  | 1015  | 2129  | 2244  | 2578  | 2408  | 2733  | 3076  | 2894  |   |
| llvbl  | 480   | 533   | 598   | 865   | 1016  | 814   | 825   | 775   | 983   | 1154  | 1119  | 784   | 856   | 752   | 509   | 573   | 657   | 832   | 990   | 669   | 854   | 1158  | 1056  | 1042  | 1273  | 754   | 752   | 764   |   |
| llvbl  | 848   | 421   | 466   | 263   | 111   | 497   | 131   | 893   | 948   | 717   | 907   | 407   | 483   | 395   | 609   | 775   | 331   | 396   | 154   | 114   | 124   | 302   | 946   |       |       |       |       |       |   |

|         |       |       |       |       |       |       |       |       |       |       |       |       |       |       |       |       |       |       |       |       |       |       |       |       |       |       |       |       |         |
|---------|-------|-------|-------|-------|-------|-------|-------|-------|-------|-------|-------|-------|-------|-------|-------|-------|-------|-------|-------|-------|-------|-------|-------|-------|-------|-------|-------|-------|---------|
| Insl3   | 6     | 9     | 17    | 13    | 11    | 17    | 7     | 2     | 4     | 4     | 9     | 2     | 1     | 7     | 3     | 11    | 3     | 15    | 9     | 4     | 10    | 3     | 11    | 3     | 9     | 3     | 3     | 12    | Insl3   |
| Insl5   | 141   | 154   | 193   | 232   | 204   | 180   | 245   | 21    | 16    | 25    | 17    | 24    | 18    | 32    | 170   | 154   | 312   | 297   | 242   | 136   | 219   | 30    | 19    | 25    | 23    | 35    | 13    | 21    | Insl5   |
| Insl6   | 373   | 374   | 289   | 241   | 211   | 173   | 255   | 53    | 55    | 34    | 44    | 67    | 66    | 57    | 377   | 404   | 355   | 296   | 217   | 264   | 210   | 40    | 53    | 44    | 21    | 72    | 36    | 80    | Insl6   |
| Insm1   | 2669  | 2627  | 4376  | 4148  | 4067  | 3476  | 3783  | 4104  | 3507  | 5409  | 3939  | 6760  | 4458  | 6580  | 2699  | 2211  | 4979  | 3825  | 4752  | 2774  | 4337  | 4976  | 2755  | 6780  | 6290  | 6689  | 5287  | 6270  | Insm1   |
| Insm2   | 65    | 79    | 102   | 101   | 124   | 91    | 126   | 78    | 74    | 68    | 62    | 87    | 64    | 92    | 86    | 56    | 97    | 113   | 96    | 89    | 106   | 120   | 88    | 91    | 113   | 108   | 44    | 80    | Insm2   |
| Insr    | 9897  | 8892  | 9093  | 11291 | 12354 | 12692 | 13531 | 8433  | 8174  | 9539  | 9173  | 9400  | 9280  | 10330 | 9866  | 9465  | 10275 | 11241 | 11533 | 10120 | 12953 | 9722  | 7326  | 9084  | 10692 | 7219  | 9186  | 9117  | Insr    |
| Insr    | 385   | 444   | 394   | 421   | 553   | 289   | 272   | 342   | 518   | 470   | 780   | 329   | 552   | 327   | 348   | 699   | 416   | 472   | 322   | 305   | 267   | 745   | 465   | 330   | 459   | 397   | 265   | 294   | Insr    |
| Insyn1  | 609   | 711   | 720   | 1004  | 1402  | 1087  | 1096  | 1182  | 1319  | 1625  | 1688  | 1284  | 1203  | 1064  | 558   | 631   | 927   | 1148  | 1356  | 1103  | 1155  | 1671  | 1443  | 1580  | 1735  | 1382  | 1080  | 1042  | Insyn1  |
| Insyn2a | 161   | 152   | 202   | 301   | 496   | 374   | 436   | 442   | 508   | 655   | 452   | 401   | 272   | 456   | 171   | 170   | 250   | 355   | 526   | 359   | 450   | 725   | 381   | 524   | 672   | 343   | 217   | 292   | Insyn2a |
| Insyn2b | 361   | 348   | 270   | 390   | 649   | 549   | 597   | 962   | 886   | 783   | 687   | 535   | 606   | 653   | 426   | 344   | 389   | 426   | 561   | 588   | 517   | 1071  | 868   | 610   | 854   | 369   | 470   | 490   | Insyn2b |
| Ints1   | 7645  | 10194 | 11292 | 10572 | 8979  | 8484  | 7495  | 5523  | 7340  | 8077  | 7517  | 9375  | 7574  | 7538  | 7083  | 9604  | 11206 | 10418 | 10097 | 6865  | 8148  | 8255  | 6576  | 8853  | 8281  | 7684  | 7259  | 7139  | Ints1   |
| Ints10  | 6450  | 6516  | 5737  | 6124  | 6531  | 6048  | 7215  | 6103  | 5556  | 5299  | 5000  | 5219  | 4663  | 6359  | 6463  | 5829  | 5656  | 6012  | 6658  | 7222  | 6955  | 5162  | 5330  | 5081  | 5761  | 4539  | 4832  | 5009  | Ints10  |
| Ints11  | 4204  | 4600  | 4526  | 4461  | 3649  | 3875  | 4188  | 3281  | 3388  | 3407  | 3105  | 3936  | 3352  | 3819  | 3852  | 4078  | 4304  | 4150  | 4422  | 3978  | 4131  | 3230  | 3489  | 3974  | 3795  | 4406  | 4051  | 3952  | Ints11  |
| Ints12  | 1832  | 1589  | 1775  | 1583  | 1518  | 1677  | 1626  | 2980  | 2437  | 2212  | 2046  | 2430  | 2421  | 2525  | 1899  | 1602  | 1738  | 1541  | 1627  | 2018  | 1517  | 2562  | 2467  | 2323  | 2325  | 2795  | 2707  | 2671  | Ints12  |
| Ints13  | 6262  | 6093  | 5663  | 5775  | 4328  | 4938  | 5370  | 6135  | 5062  | 4693  | 4666  | 5560  | 5237  | 5855  | 6136  | 5816  | 5762  | 5326  | 4697  | 5544  | 5143  | 4931  | 4966  | 4921  | 5018  | 5856  | 5560  | 6054  | Ints13  |
| Ints14  | 1746  | 1697  | 1680  | 1227  | 1564  | 1569  | 1519  | 4153  | 4120  | 3341  | 3351  | 4277  | 4042  | 4153  | 1902  | 1551  | 1591  | 1301  | 1589  | 1773  | 1429  | 3330  | 4072  | 3737  | 3822  | 4614  | 4625  | 4587  | Ints14  |
| Ints2   | 5966  | 4634  | 4450  | 4254  | 4383  | 4708  | 4835  | 7806  | 6879  | 6125  | 6454  | 7577  | 7303  | 7412  | 5512  | 4981  | 4429  | 4407  | 4525  | 4967  | 4797  | 6378  | 6272  | 6728  | 6510  | 6238  | 7704  | 7435  | Ints2   |
| Ints3   | 6567  | 7184  | 7844  | 7693  | 7650  | 6837  | 7245  | 7581  | 8275  | 8987  | 8218  | 9804  | 8508  | 9156  | 6153  | 6423  | 7844  | 7232  | 8382  | 5969  | 7192  | 9022  | 7892  | 9077  | 8931  | 9477  | 9073  | 9365  | Ints3   |
| Ints4   | 5917  | 6216  | 4624  | 4556  | 4423  | 4764  | 5188  | 5973  | 5691  | 4763  | 4439  | 5403  | 4998  | 5377  | 6101  | 5579  | 4647  | 4811  | 4781  | 5768  | 5078  | 4593  | 5277  | 4842  | 4653  | 5471  | 5319  | 5447  | Ints4   |
| Ints5   | 3013  | 3498  | 3592  | 3726  | 2874  | 2974  | 3049  | 2104  | 2298  | 2532  | 2322  | 2805  | 2368  | 2633  | 2585  | 3337  | 3522  | 3436  | 3169  | 2512  | 3133  | 2204  | 2203  | 2741  | 2475  | 3025  | 2392  | 2918  | Ints5   |
| Ints6   | 2895  | 2343  | 2568  | 2543  | 2723  | 2753  | 2997  | 4516  | 3953  | 3494  | 4089  | 4341  | 4043  | 4437  | 2929  | 2454  | 2605  | 2461  | 2874  | 2885  | 3039  | 3873  | 3880  | 3897  | 3932  | 4064  | 4217  | 4351  | Ints6   |
| Ints6l  | 6909  | 5218  | 4723  | 5142  | 6110  | 6773  | 6533  | 9932  | 8164  | 7434  | 8450  | 8660  | 8748  | 9092  | 6773  | 5656  | 4832  | 5313  | 5515  | 6620  | 6596  | 8504  | 8106  | 6879  | 7861  | 5360  | 8814  | 8380  | Ints6l  |
| Ints7   | 4432  | 4345  | 3924  | 4206  | 3818  | 3930  | 4442  | 6878  | 7517  | 7789  | 7232  | 8591  | 8109  | 8976  | 3965  | 3984  | 3945  | 3871  | 4371  | 3898  | 4303  | 6724  | 7213  | 7701  | 7571  | 8170  | 8849  | 8968  | Ints7   |
| Ints8   | 7414  | 6982  | 7168  | 6898  | 6260  | 6032  | 7306  | 9003  | 6863  | 6273  | 6124  | 7865  | 7012  | 7936  | 7832  | 7185  | 7085  | 6775  | 6837  | 7705  | 6856  | 7097  | 6592  | 7149  | 6956  | 8112  | 7697  | 7973  | Ints8   |
| Ints9   | 4366  | 5008  | 4188  | 3812  | 3026  | 3286  | 3677  | 2691  | 2663  | 2457  | 2181  | 2878  | 2740  | 2980  | 4143  | 3853  | 3968  | 3738  | 3578  | 3478  | 3548  | 2396  | 2638  | 2727  | 2543  | 3472  | 3086  | 3055  | Ints9   |
| Intu    | 212   | 89    | 194   | 76    | 106   | 84    | 211   | 84    | 59    | 35    | 145   | 93    | 78    | 45    | 161   | 72    | 133   | 123   | 56    | 146   | 66    | 62    | 46    | 35    | 144   | 39    | 193   | 20    | Intu    |
| Invs    | 1299  | 1417  | 1236  | 1352  | 1209  | 1312  | 1332  | 1719  | 1817  | 1752  | 1970  | 1654  | 1862  | 1750  | 1363  | 1262  | 1442  | 1402  | 1314  | 1212  | 1418  | 1975  | 1904  | 1619  | 1532  | 1578  | 1632  | 1728  | Invs    |
| Ip6k1   | 8774  | 10342 | 10425 | 11999 | 12559 | 11621 | 11126 | 9669  | 10046 | 11228 | 11054 | 10823 | 10892 | 10467 | 8658  | 9189  | 11651 | 11898 | 12834 | 10324 | 12150 | 11214 | 9836  | 11441 | 12295 | 11082 | 10119 | 10900 | Ip6k1   |
| Ip6k2   | 566   | 718   | 939   | 1069  | 1298  | 1005  | 758   | 1249  | 1325  | 1670  | 1595  | 1514  | 1624  | 1375  | 527   | 590   | 1049  | 969   | 1206  | 1094  | 878   | 1125  | 1292  | 1775  | 2088  | 1823  | 1871  | 1278  | Ip6k2   |
| Ip6k3   | 6     | 5     | 3     | 0     | 2     | 8     | 4     | 11    | 5     | 5     | 14    | 11    | 17    | 14    | 4     | 6     | 2     | 0     | 2     | 1     | 6     | 13    | 14    | 7     | 2     | 19    | 17    | 13    | Ip6k3   |
| Ip6cf1  | 48    | 30    | 48    | 50    | 116   | 67    | 110   | 281   | 270   | 218   | 224   | 264   | 186   | 246   | 41    | 37    | 49    | 55    | 52    | 117   | 80    | 241   | 258   | 248   | 267   | 222   | 230   | 223   | Ip6cf1  |
| Ip6mk   | 5512  | 5218  | 5487  | 6093  | 5785  | 6167  | 6693  | 3495  | 3128  | 3459  | 3236  | 3893  | 3370  | 3866  | 5434  | 5079  | 5667  | 6006  | 5697  | 5445  | 6231  | 3502  | 3036  | 3561  | 3819  | 3556  | 3586  | 3949  | Ip6mk   |
| Ip6o11  | 7374  | 6678  | 6552  | 5504  | 5410  | 6067  | 6521  | 6155  | 5348  | 4612  | 4544  | 6064  | 5700  | 6027  | 7667  | 6510  | 5921  | 5567  | 5697  | 7003  | 6129  | 4533  | 5291  | 4972  | 5050  | 5936  | 6523  | 6354  | Ip6o11  |
| Ip6o3   | 8169  | 10860 | 8414  | 10536 | 9353  | 9376  | 8983  | 4615  | 5240  | 5301  | 4858  | 5660  | 5058  | 5227  | 8039  | 9067  | 9447  | 10423 | 10068 | 8539  | 9584  | 5274  | 4897  | 5084  | 6005  | 5087  | 5480  | 5035  | Ip6o3   |
| Ip6o4   | 1712  | 2100  | 2214  | 2184  | 2124  | 1876  | 1925  | 1512  | 1914  | 2346  | 2392  | 2287  | 2152  | 1984  | 1643  | 2079  | 2199  | 2210  | 2055  | 1779  | 2096  | 2151  | 2058  | 2442  | 2111  | 2477  | 1864  | 2044  | Ip6o4   |
| Ip6o5   | 41666 | 40506 | 36993 | 30601 | 26649 | 29870 | 33053 | 27114 | 24767 | 21777 | 20871 | 30173 | 26008 | 30203 | 38733 | 36007 | 33428 | 29591 | 31018 | 34141 | 31709 | 20277 | 23753 | 25021 | 23430 | 31218 | 31568 | 32261 | Ip6o5   |
| Ip6o7   | 33561 | 28234 | 28482 | 27999 | 25737 | 27648 | 32830 | 28482 | 23524 | 20693 | 21381 | 24510 | 23602 | 25891 | 34661 | 30313 | 28385 | 28225 | 27231 | 32537 | 30534 | 21960 | 23231 | 22106 | 22763 | 24041 | 25816 | 26819 | Ip6o7   |
| Ip6o8   | 5472  | 4622  | 5385  | 5022  | 4901  | 4786  | 5168  | 4731  | 4578  | 4717  | 4682  | 5296  | 5379  | 5281  | 5105  | 5083  | 4905  | 4829  | 4701  | 4559  | 4783  | 4461  | 4484  | 4744  | 4812  | 5201  | 5691  | 5319  | Ip6o8   |
| Ip6o9   | 21311 | 20797 | 19595 | 20157 | 20630 | 20861 | 22154 | 20252 | 20673 | 21370 | 19422 | 24203 | 21965 | 23977 | 19978 | 18922 | 20334 | 20010 | 21503 | 19904 | 22096 | 20286 | 18911 | 22006 | 22611 | 22377 | 23580 | 24192 | Ip6o9   |
| Ip6p    | 1061  | 1019  | 836   | 1061  | 970   | 959   | 1056  | 1263  | 1130  | 984   | 975   | 1300  | 1047  | 1156  | 1197  | 868   | 968   | 951   | 992   | 1269  | 1055  | 759   | 1052  | 1097  | 1015  | 1077  | 1235  | 1135  | Ip6p    |
| Ip6pk   | 1335  | 1367  | 1147  | 1057  | 884   | 927   | 921   | 1133  | 1008  | 838   | 928   | 999   | 937   | 915   | 1283  | 1271  | 1065  | 943   | 921   | 1118  | 906   | 974   | 995   | 919   | 954   | 1021  | 926   | 1044  | Ip6pk   |
| lqank1  | 141   | 146   | 198   | 166   | 146   | 219   | 204   | 154   | 156   | 203   | 157   | 136   | 186   | 140   | 124   | 111   | 175   | 150   | 168   | 166   | 143   | 170   | 161   | 185   | 195   | 168   | 153   | 165   | lqank1  |
| lqca    | 21    | 26    | 12    | 22    | 45    | 16    | 28    | 42    | 45    | 28    | 23    | 43    | 45    | 17    | 17    | 30    | 14    | 18    | 25    | 14    | 26    | 32    | 67    | 25    | 20    | 26    | 28    | 23    | lqca    |
| lqca11  | 30    | 33    | 20    | 50    | 36    | 46    | 60    | 53    | 52    | 36    | 51    | 77    | 36    | 92    | 21    | 17    | 48    | 48    | 39    | 53    | 54    | 37    | 53    | 96    | 76    | 62    | 69    | 51    | lqca11  |
| lqcb1   | 4975  | 4186  | 5222  | 4425  | 3848  | 4220  | 4769  | 4714  | 3609  | 3567  | 3470  | 3893  | 3647  | 4392  | 5356  | 4808  | 4735  | 4066  | 4052  | 4732  | 4352  | 4189  | 3696  | 3913  | 3621  | 4507  | 4335  | 4405  | lqcb1   |
| lqcc    | 1057  | 1243  | 1296  | 1293  | 1348  | 1218  | 1225  | 1467  | 1495  | 1529  | 1577  | 1574  | 1580  | 1761  | 1182  | 1099  | 1234  | 1218  | 1140  | 1188  | 1383  | 1429  | 1518  | 1606  | 1649  | 1573  | 1590  | 1571  | lqcc    |
| lqcd    | 130   | 202   | 226   | 140   | 160   | 152   | 149   | 118   | 138   | 155   | 117   | 202   | 191   | 114   | 167   | 199   | 194   | 153   | 163   | 199   | 151   | 137   | 188   | 136   | 138   | 133   | 122   | 110   | lqcd    |
| lqce    | 2947  | 345   |       |       |       |       |       |       |       |       |       |       |       |       |       |       |       |       |       |       |       |       |       |       |       |       |       |       |         |

|         |       |       |       |       |       |       |       |       |       |       |       |       |       |       |       |       |       |       |       |       |       |       |       |       |       |       |       |       |         |
|---------|-------|-------|-------|-------|-------|-------|-------|-------|-------|-------|-------|-------|-------|-------|-------|-------|-------|-------|-------|-------|-------|-------|-------|-------|-------|-------|-------|-------|---------|
| lrf5    | 92    | 136   | 148   | 95    | 133   | 98    | 80    | 90    | 112   | 133   | 184   | 123   | 128   | 79    | 113   | 142   | 180   | 123   | 129   | 103   | 84    | 102   | 206   | 121   | 89    | 109   | 103   | 83    | lrf5    |
| lrf6    | 1371  | 523   | 431   | 327   | 156   | 341   | 98    | 705   | 1023  | 547   | 720   | 181   | 324   | 191   | 698   | 1031  | 228   | 428   | 100   | 126   | 86    | 169   | 1243  | 498   | 113   | 351   | 199   | 228   | lrf6    |
| lrf7    | 35    | 45    | 40    | 31    | 36    | 30    | 17    | 38    | 31    | 56    | 63    | 27    | 25    | 36    | 37    | 53    | 37    | 29    | 29    | 35    | 29    | 33    | 52    | 38    | 38    | 67    | 52    | 42    | lrf7    |
| lrf8    | 333   | 432   | 560   | 409   | 273   | 284   | 276   | 147   | 165   | 147   | 259   | 192   | 169   | 166   | 334   | 452   | 440   | 360   | 303   | 280   | 284   | 206   | 221   | 163   | 169   | 220   | 170   | 165   | lrf8    |
| lrf9    | 1837  | 2177  | 2127  | 2667  | 2423  | 2337  | 2451  | 1515  | 1412  | 1745  | 1796  | 1607  | 1752  | 1672  | 1718  | 2232  | 2427  | 2611  | 2431  | 2075  | 2561  | 1977  | 1430  | 1879  | 1821  | 1687  | 1841  | 1830  | lrf9    |
| lrgc1   | 0     | 0     | 0     | 0     | 0     | 0     | 0     | 0     | 1     | 0     | 1     | 0     | 0     | 0     | 0     | 0     | 0     | 0     | 2     | 0     | 0     | 0     | 0     | 0     | 0     | 0     | 1     | 0     | lrgc1   |
| lrgm1   | 40    | 24    | 59    | 30    | 51    | 50    | 38    | 71    | 67    | 73    | 98    | 59    | 67    | 54    | 42    | 51    | 42    | 26    | 51    | 66    | 35    | 85    | 104   | 36    | 57    | 132   | 60    | 71    | lrgm1   |
| lrgm2   | 102   | 91    | 110   | 76    | 97    | 123   | 57    | 115   | 130   | 183   | 237   | 150   | 138   | 105   | 121   | 124   | 80    | 94    | 49    | 133   | 69    | 174   | 200   | 150   | 96    | 139   | 134   | 154   | lrgm2   |
| lrrq    | 7974  | 9685  | 9707  | 11508 | 12201 | 10768 | 10330 | 7409  | 7963  | 9491  | 8375  | 9518  | 8325  | 8690  | 7759  | 8268  | 10980 | 11465 | 12543 | 8667  | 11395 | 11102 | 7175  | 9436  | 10555 | 7293  | 7927  | 8193  | lrrq    |
| lrs1    | 5084  | 4224  | 6441  | 5544  | 5831  | 5908  | 5702  | 5208  | 5155  | 5861  | 6649  | 6378  | 6411  | 6144  | 5093  | 4708  | 5439  | 5585  | 6026  | 4702  | 5511  | 5803  | 5584  | 6225  | 6180  | 8465  | 6061  | 6659  | lrs1    |
| lrs2    | 3823  | 4333  | 4847  | 4813  | 3919  | 3434  | 3546  | 2738  | 2968  | 3378  | 3043  | 3255  | 3376  | 3345  | 3473  | 4279  | 5018  | 4648  | 4204  | 3020  | 3827  | 3375  | 2766  | 3554  | 3137  | 3793  | 3119  | 3560  | lrs2    |
| lrs3    | 30    | 28    | 54    | 26    | 12    | 15    | 10    | 4     | 7     | 2     | 12    | 4     | 8     | 10    | 20    | 41    | 31    | 24    | 6     | 20    | 20    | 3     | 3     | 2     | 0     | 10    | 3     | 6     | lrs3    |
| lrs4    | 1220  | 1136  | 828   | 1181  | 1220  | 1033  | 1019  | 432   | 615   | 463   | 549   | 544   | 263   | 528   | 1031  | 967   | 1255  | 1432  | 944   | 872   | 1165  | 1026  | 539   | 543   | 618   | 819   | 514   | 523   | lrs4    |
| lrx1    | 684   | 1283  | 1810  | 1421  | 1060  | 1093  | 635   | 1139  | 1148  | 1433  | 1287  | 1244  | 1827  | 1114  | 1015  | 1090  | 1685  | 1102  | 1189  | 924   | 904   | 1459  | 1320  | 1288  | 1370  | 505   | 1264  | 1329  | lrx1    |
| lrx2    | 1375  | 2499  | 3558  | 2685  | 2286  | 2379  | 1266  | 2738  | 2028  | 2728  | 2218  | 2353  | 4431  | 2118  | 2450  | 2824  | 3428  | 2317  | 2360  | 2028  | 1913  | 3380  | 2522  | 1897  | 2584  | 767   | 2502  | 2359  | lrx2    |
| lrx3    | 1647  | 2116  | 3678  | 1992  | 1244  | 1377  | 518   | 1685  | 1489  | 1837  | 1582  | 2141  | 2866  | 2311  | 1708  | 1776  | 2670  | 1437  | 1538  | 1000  | 1271  | 1835  | 1526  | 2104  | 1777  | 1423  | 2537  | 2841  | lrx3    |
| lrx4    | 59    | 113   | 76    | 93    | 135   | 113   | 4     | 237   | 452   | 322   | 262   | 114   | 491   | 117   | 120   | 150   | 145   | 112   | 65    | 96    | 21    | 227   | 441   | 167   | 101   | 55    | 112   | 117   | lrx4    |
| lrx5    | 985   | 1217  | 1901  | 1125  | 878   | 1096  | 526   | 1292  | 1032  | 1145  | 1145  | 1376  | 1951  | 1299  | 1114  | 1143  | 1465  | 982   | 1065  | 762   | 877   | 1288  | 1133  | 1189  | 1193  | 676   | 1546  | 1648  | lrx5    |
| lrx6    | 91    | 109   | 172   | 120   | 114   | 112   | 54    | 140   | 150   | 137   | 185   | 137   | 153   | 149   | 65    | 110   | 123   | 90    | 175   | 116   | 109   | 211   | 187   | 163   | 200   | 79    | 146   | 171   | lrx6    |
| lrsa1   | 6853  | 7578  | 6361  | 6942  | 6389  | 6590  | 7610  | 4528  | 3243  | 3741  | 3968  | 3958  | 4124  | 3998  | 7709  | 7258  | 6540  | 6859  | 6400  | 7731  | 7234  | 4064  | 4493  | 3878  | 4235  | 3895  | 4036  | 4330  | lrsa1   |
| lrsa2   | 2255  | 2243  | 2466  | 2166  | 1877  | 1833  | 2360  | 2429  | 1841  | 1977  | 1897  | 2171  | 2168  | 2490  | 2368  | 2135  | 2146  | 1976  | 1988  | 2082  | 2121  | 2102  | 2008  | 2263  | 2016  | 2463  | 2403  | 2616  | lrsa2   |
| lrsu    | 1852  | 2275  | 1918  | 1961  | 1403  | 1640  | 1662  | 1286  | 1280  | 1320  | 1198  | 1464  | 1370  | 1442  | 1871  | 1923  | 1841  | 1754  | 1670  | 1971  | 1674  | 1135  | 1298  | 1336  | 1254  | 1565  | 1528  | 1524  | lrsu    |
| lsg15   | 21    | 16    | 23    | 29    | 25    | 16    | 22    | 23    | 35    | 38    | 50    | 40    | 32    | 52    | 13    | 53    | 23    | 22    | 12    | 132   | 60    | 38    | 34    | 51    | 36    | 56    | 63    | 63    | lsg15   |
| lsg20   | 130   | 193   | 199   | 220   | 123   | 145   | 159   | 12    | 47    | 25    | 43    | 33    | 27    | 33    | 109   | 169   | 195   | 194   | 148   | 144   | 140   | 18    | 24    | 32    | 45    | 20    | 44    | 45    | lsg20   |
| lsg20I2 | 4760  | 4660  | 5178  | 4507  | 3768  | 3907  | 4261  | 4460  | 4061  | 4345  | 4327  | 5264  | 4782  | 5401  | 4619  | 4123  | 4651  | 4048  | 4290  | 3961  | 4196  | 4107  | 3928  | 4997  | 4533  | 6387  | 5211  | 5620  | lsg20I2 |
| lsl1    | 2756  | 2280  | 1447  | 2559  | 3548  | 2487  | 3760  | 5202  | 4832  | 4094  | 4186  | 3955  | 2724  | 3977  | 3192  | 2132  | 2481  | 2626  | 2985  | 2591  | 3227  | 6122  | 2840  | 3871  | 4835  | 3771  | 3228  | 3189  | lsl1    |
| lsl2    | 215   | 276   | 182   | 174   | 320   | 105   | 65    | 399   | 371   | 325   | 424   | 70    | 513   | 65    | 265   | 333   | 197   | 228   | 114   | 98    | 102   | 585   | 183   | 57    | 272   | 35    | 109   | 108   | lsl2    |
| lslr    | 1660  | 1869  | 1773  | 1624  | 1582  | 1720  | 921   | 2451  | 3846  | 2899  | 5775  | 2034  | 2671  | 1856  | 1667  | 2284  | 1513  | 1942  | 1094  | 1404  | 1018  | 2984  | 5421  | 2631  | 2211  | 2912  | 2273  | 1784  | lslr    |
| lslr2   | 10766 | 13611 | 11281 | 21078 | 23740 | 22582 | 25019 | 22311 | 26592 | 27851 | 20792 | 32487 | 12651 | 29794 | 10615 | 7805  | 18607 | 21810 | 29603 | 21682 | 25419 | 28649 | 18489 | 36280 | 39359 | 32920 | 25003 | 23949 | lslr2   |
| lsm1    | 151   | 98    | 92    | 73    | 56    | 101   | 23    | 145   | 224   | 202   | 271   | 46    | 136   | 88    | 99    | 157   | 44    | 112   | 42    | 42    | 31    | 99    | 238   | 102   | 81    | 64    | 87    | 84    | lsm1    |
| lsm2    | 148   | 134   | 152   | 125   | 156   | 135   | 95    | 118   | 108   | 141   | 100   | 184   | 204   | 129   | 124   | 139   | 154   | 138   | 110   | 124   | 113   | 95    | 166   | 143   | 105   | 187   | 124   | 163   | lsm2    |
| lsoc1   | 10810 | 8064  | 9167  | 8117  | 8065  | 8364  | 8726  | 7844  | 8064  | 7225  | 7825  | 8460  | 8543  | 8442  | 9724  | 9745  | 8189  | 8464  | 8108  | 8033  | 8267  | 7204  | 8309  | 7979  | 6961  | 9475  | 8496  | 9012  | lsoc1   |
| lsoc2a  | 1908  | 2682  | 2548  | 2636  | 2006  | 2038  | 1912  | 894   | 1212  | 1140  | 1182  | 1188  | 1024  | 1156  | 1921  | 2291  | 2555  | 2264  | 2104  | 1960  | 1900  | 876   | 1220  | 1175  | 1118  | 1436  | 1152  | 1241  | lsoc2a  |
| lsoc2b  | 80    | 65    | 56    | 71    | 65    | 54    | 57    | 68    | 96    | 94    | 62    | 58    | 66    | 56    | 63    | 56    | 50    | 55    | 57    | 42    | 55    | 79    | 98    | 62    | 67    | 68    | 71    | 77    | lsoc2b  |
| lss1    | 15479 | 15299 | 12877 | 14215 | 14173 | 13717 | 14397 | 17954 | 14862 | 14394 | 13900 | 14828 | 14212 | 14844 | 15335 | 14435 | 13626 | 14038 | 14276 | 15457 | 14263 | 15720 | 14532 | 14407 | 15379 | 14475 | 14760 | 14455 | lss1    |
| lssx    | 0     | 0     | 0     | 0     | 0     | 0     | 0     | 0     | 0     | 0     | 0     | 0     | 2     | 0     | 0     | 0     | 0     | 0     | 0     | 0     | 0     | 0     | 1     | 0     | 0     | 0     | 0     | 0     | lssx    |
| lsv1    | 964   | 729   | 819   | 732   | 736   | 775   | 858   | 1381  | 1320  | 1382  | 1287  | 1586  | 1387  | 1683  | 828   | 735   | 758   | 661   | 644   | 806   | 733   | 1163  | 1180  | 1387  | 1517  | 1551  | 1598  | 1730  | lsv1    |
| lsvm1   | 5375  | 7121  | 6639  | 5908  | 4807  | 4779  | 4169  | 3268  | 4164  | 3475  | 4046  | 3401  | 3963  | 2760  | 4824  | 6538  | 6387  | 5420  | 5586  | 4560  | 4206  | 3456  | 4162  | 3860  | 3271  | 4838  | 3433  | 3151  | lsvm1   |
| ltch    | 8556  | 7197  | 6569  | 6104  | 6828  | 7349  | 7569  | 10190 | 8897  | 7634  | 7859  | 8774  | 8128  | 8913  | 8465  | 7462  | 6675  | 6381  | 6764  | 7958  | 7269  | 8193  | 8920  | 7702  | 8334  | 7455  | 9022  | 8871  | ltch    |
| ltfg1   | 8327  | 7351  | 6889  | 7717  | 9875  | 9581  | 10087 | 13087 | 11098 | 10751 | 9716  | 9698  | 9662  | 10004 | 9853  | 7791  | 7314  | 8734  | 8635  | 10045 | 9862  | 13139 | 11804 | 9647  | 10948 | 9072  | 9917  | 9862  | ltfg1   |
| ltfg2   | 911   | 886   | 1015  | 968   | 1126  | 1054  | 940   | 1788  | 1934  | 2059  | 2146  | 2373  | 2181  | 2293  | 793   | 803   | 969   | 963   | 1174  | 962   | 1014  | 2239  | 1878  | 2302  | 2393  | 2342  | 2322  | 2217  | ltfg2   |
| ltga1   | 1555  | 1433  | 1161  | 1257  | 1624  | 1633  | 1661  | 1504  | 1766  | 1515  | 1976  | 1640  | 1830  | 1833  | 1638  | 1594  | 1095  | 1263  | 1345  | 1677  | 1715  | 1831  | 2016  | 1428  | 1835  | 1325  | 1753  | 1591  | ltga1   |
| ltga10  | 604   | 781   | 732   | 810   | 765   | 655   | 713   | 442   | 472   | 568   | 823   | 348   | 484   | 441   | 556   | 724   | 736   | 894   | 869   | 571   | 752   | 700   | 437   | 574   | 535   | 372   | 395   | 409   | ltga10  |
| ltga11  | 912   | 1419  | 1411  | 1194  | 569   | 1354  | 437   | 872   | 1074  | 1409  | 1541  | 1718  | 1917  | 1561  | 1015  | 1640  | 1064  | 1448  | 599   | 416   | 487   | 1196  | 1447  | 1672  | 1406  | 1362  | 1705  | 1569  | ltga11  |
| ltga2   | 551   | 435   | 287   | 347   | 490   | 482   | 383   | 972   | 1059  | 905   | 1063  | 821   | 976   | 832   | 630   | 437   | 350   | 395   | 312   | 562   | 417   | 906   | 1127  | 791   | 845   | 608   | 912   | 831   | ltga2   |
| ltga2b  | 498   | 598   | 624   | 442   | 378   | 387   | 277   | 302   | 372   | 351   | 336   | 517   | 790   | 391   | 508   | 714   | 556   | 475   | 422   | 386   | 369   | 287   | 368   | 398   | 305   | 635   | 625   | 497   | ltga2b  |
| ltga3   | 1803  | 1973  | 2225  | 1949  | 2575  | 1864  | 1629  | 1249  | 1742  | 1947  | 1495  | 1138  | 1372  | 955   | 1532  | 2359  | 2187  | 2220  | 2204  | 1641  | 1854  | 1726  | 1589  | 1349  | 1381  | 1097  | 1025  | 955   | ltga3   |
| ltga4   | 3037  | 2344  | 2264  | 1572  | 2184  | 2284  | 1919  | 2955  | 2993  | 2377  | 4332  | 2860  | 3894  | 2843  | 3233  | 3523  | 1738  | 1758  | 1600  | 2158  | 1908  | 2577  | 3573  | 1946  | 2360  | 1983  | 3412  | 2932  | ltga4   |
| ltga5   | 2765  | 2973  | 3732  | 2314  | 2023  | 2781  | 1570  | 2199  | 3087  |       |       |       |       |       |       |       |       |       |       |       |       |       |       |       |       |       |       |       |         |

|          |       |       |       |       |       |       |       |       |       |       |       |       |       |       |       |       |       |       |       |       |       |       |       |       |       |       |       |       |          |         |
|----------|-------|-------|-------|-------|-------|-------|-------|-------|-------|-------|-------|-------|-------|-------|-------|-------|-------|-------|-------|-------|-------|-------|-------|-------|-------|-------|-------|-------|----------|---------|
| ltm2b    | 12777 | 11537 | 11668 | 12232 | 13436 | 12604 | 13168 | 12181 | 13050 | 12480 | 13797 | 10219 | 11484 | 10492 | 13338 | 12899 | 11070 | 13338 | 12034 | 13876 | 12868 | 12442 | 15190 | 11610 | 12028 | 11500 | 9861  | 10341 | ltm2b    |         |
| ltm2c    | 7094  | 8005  | 7055  | 7547  | 6861  | 7128  | 6041  | 6482  | 8013  | 7416  | 7737  | 6053  | 6673  | 5647  | 6626  | 7627  | 6744  | 7071  | 7065  | 7405  | 6478  | 6181  | 9068  | 6821  | 6415  | 6742  | 6177  | 5999  | ltm2c    |         |
| ltpa     | 5264  | 6248  | 6303  | 5348  | 4789  | 4947  | 5334  | 4838  | 4874  | 4228  | 4173  | 5204  | 4931  | 5185  | 5432  | 6068  | 5742  | 4876  | 5353  | 6812  | 5067  | 3925  | 5130  | 4857  | 4626  | 5760  | 5771  | 5478  | ltpa     |         |
| ltpk1    | 2798  | 3756  | 3159  | 3970  | 4118  | 3531  | 3977  | 1175  | 1542  | 1499  | 1325  | 1524  | 1295  | 1400  | 2831  | 2848  | 3611  | 4185  | 4430  | 3275  | 4050  | 1502  | 1231  | 1635  | 1641  | 1529  | 1094  | 1267  | ltpk1    |         |
| ltpka    | 328   | 411   | 459   | 424   | 251   | 246   | 248   | 18    | 22    | 14    | 11    | 23    | 18    | 32    | 272   | 368   | 399   | 308   | 321   | 250   | 264   | 13    | 16    | 27    | 23    | 55    | 24    | 42    | ltpka    |         |
| ltpkb    | 2497  | 2293  | 2798  | 2509  | 2416  | 2584  | 1821  | 2177  | 2912  | 2755  | 3498  | 2380  | 2816  | 2206  | 2143  | 2519  | 2684  | 2542  | 2757  | 1776  | 2128  | 2470  | 3234  | 2806  | 2260  | 2663  | 2368  | 2584  | ltpkb    |         |
| ltpkc    | 1423  | 1735  | 1472  | 1736  | 1420  | 1497  | 1224  | 1010  | 1132  | 1075  | 1137  | 1213  | 1145  | 1075  | 1304  | 1703  | 1537  | 1817  | 1578  | 1169  | 1406  | 1173  | 1220  | 1176  | 1220  | 1100  | 1113  | 1127  | ltpkc    |         |
| ltp1     | 7816  | 7029  | 4348  | 4851  | 5020  | 5538  | 5335  | 3058  | 3407  | 2949  | 3769  | 2931  | 3495  | 2960  | 6592  | 8214  | 4028  | 5327  | 4788  | 6140  | 6001  | 2374  | 4339  | 2566  | 2921  | 2084  | 3397  | 2718  | ltp1     |         |
| ltp2     | 607   | 724   | 582   | 527   | 606   | 644   | 459   | 558   | 695   | 694   | 917   | 465   | 632   | 514   | 608   | 825   | 481   | 618   | 497   | 577   | 582   | 657   | 791   | 460   | 620   | 384   | 494   | 446   | ltp2     |         |
| ltp3     | 2193  | 2273  | 1755  | 1807  | 1573  | 1734  | 1052  | 838   | 1265  | 1244  | 1331  | 964   | 1642  | 1298  | 818   | 1652  | 2960  | 1581  | 2154  | 1218  | 908   | 1078  | 1011  | 1417  | 988   | 850   | 794   | 967   | 856      | ltp3    |
| ltp1d1   | 2     | 3     | 0     | 13    | 19    | 18    | 29    | 26    | 38    | 60    | 25    | 28    | 19    | 21    | 1     | 5     | 6     | 17    | 6     | 13    | 29    | 12    | 38    | 33    | 45    | 17    | 12    | 14    | ltp1d1   |         |
| ltp1d2   | 4099  | 3965  | 3279  | 3270  | 3632  | 3521  | 3549  | 2275  | 2524  | 2092  | 2590  | 1821  | 2257  | 1845  | 4067  | 4569  | 3286  | 3822  | 3070  | 3414  | 3418  | 2276  | 2840  | 1940  | 2078  | 1656  | 2012  | 1812  | ltp1d2   |         |
| ltp1rip  | 2173  | 2635  | 2383  | 2418  | 1987  | 2185  | 2056  | 1065  | 1350  | 1264  | 1206  | 1784  | 1731  | 1622  | 1913  | 2573  | 2420  | 2079  | 2291  | 1890  | 1970  | 1079  | 1223  | 1454  | 1194  | 1934  | 1771  | 1792  | ltp1rip  |         |
| ltp1rip1 | 1262  | 1278  | 1283  | 1182  | 1178  | 1174  | 1179  | 738   | 912   | 904   | 907   | 961   | 1033  | 1007  | 1073  | 1146  | 1287  | 1170  | 1268  | 1122  | 1107  | 695   | 962   | 993   | 871   | 1192  | 975   | 1106  | ltp1rip1 |         |
| ltp1rip2 | 1388  | 1072  | 1619  | 891   | 1141  | 1158  | 725   | 1854  | 2305  | 2173  | 3565  | 1742  | 2612  | 1078  | 1216  | 1350  | 1181  | 1146  | 873   | 794   | 778   | 1963  | 2742  | 2072  | 1778  | 1943  | 2026  | 1936  | ltp1rip2 |         |
| ltsn1    | 17642 | 19960 | 20777 | 24962 | 27576 | 24965 | 26942 | 16767 | 17213 | 21699 | 18751 | 19733 | 18770 | 20694 | 18762 | 20150 | 22482 | 25409 | 25306 | 20475 | 28364 | 20301 | 15872 | 19619 | 23938 | 15324 | 18389 | 18924 | ltsn1    |         |
| ltsn2    | 2076  | 1622  | 1329  | 1503  | 1919  | 1940  | 1673  | 3336  | 3369  | 3107  | 3702  | 2468  | 2844  | 2561  | 1967  | 2014  | 1395  | 1742  | 1679  | 1713  | 1768  | 3014  | 3580  | 2523  | 2702  | 1986  | 2474  | 2432  | ltsn2    |         |
| lvd      | 6368  | 6657  | 6159  | 5548  | 6193  | 5905  | 6338  | 4882  | 5745  | 5644  | 5975  | 5781  | 5745  | 5794  | 5943  | 6261  | 6624  | 6542  | 6563  | 5996  | 6471  | 5013  | 5583  | 5947  | 5755  | 6309  | 5913  | 5859  | lvd      |         |
| lvl      | 1     | 0     | 0     | 0     | 0     | 0     | 0     | 0     | 2     | 0     | 1     | 0     | 0     | 0     | 1     | 0     | 0     | 0     | 0     | 0     | 0     | 0     | 2     | 0     | 0     | 0     | 0     | 0     | 0        | lvl     |
| lvs1abp  | 41720 | 31947 | 34401 | 33208 | 33513 | 35264 | 37632 | 51296 | 41982 | 38349 | 35043 | 44184 | 39344 | 46699 | 40643 | 35621 | 33925 | 32325 | 34279 | 40318 | 36572 | 37580 | 38574 | 42072 | 40413 | 45907 | 45233 | 44404 | lvs1abp  |         |
| lws1     | 7442  | 5846  | 5540  | 5992  | 6551  | 7388  | 6946  | 11177 | 9534  | 8868  | 9724  | 10755 | 10024 | 11352 | 7214  | 6076  | 6077  | 5611  | 6427  | 6999  | 6940  | 9556  | 9071  | 9145  | 9680  | 8850  | 11369 | 10205 | lws1     |         |
| lyd      | 5     | 11    | 9     | 18    | 30    | 15    | 44    | 18    | 26    | 16    | 37    | 5     | 7     | 9     | 8     | 9     | 7     | 13    | 20    | 7     | 13    | 18    | 21    | 16    | 23    | 10    | 1     | 7     | lyd      |         |
| lzum01   | 16    | 25    | 27    | 20    | 23    | 16    | 18    | 26    | 21    | 38    | 34    | 9     | 25    | 19    | 22    | 26    | 28    | 14    | 15    | 13    | 14    | 15    | 30    | 49    | 7     | 20    | 16    | 4     | lzum01   |         |
| lzum01r  | 0     | 0     | 0     | 0     | 0     | 2     | 2     | 4     | 2     | 0     | 1     | 0     | 0     | 2     | 0     | 0     | 0     | 2     | 0     | 2     | 0     | 0     | 8     | 7     | 2     | 6     | 0     | 0     | 0        | lzum01r |
| lzum04   | 850   | 1067  | 1061  | 1189  | 1217  | 1224  | 1142  | 811   | 971   | 1133  | 1159  | 942   | 1082  | 1102  | 858   | 893   | 1179  | 1199  | 1196  | 1024  | 1139  | 1138  | 849   | 1142  | 1240  | 986   | 1078  | 1000  | lzum04   |         |
| Jade1    | 1810  | 1752  | 2087  | 1793  | 2117  | 2081  | 2025  | 2939  | 2918  | 2825  | 2821  | 3587  | 2882  | 3748  | 1746  | 1606  | 1978  | 1724  | 2208  | 2034  | 2061  | 2374  | 2693  | 3099  | 3078  | 3321  | 3484  | 3488  | Jade1    |         |
| Jade2    | 241   | 197   | 293   | 245   | 290   | 246   | 200   | 220   | 402   | 287   | 382   | 244   | 260   | 199   | 185   | 178   | 264   | 235   | 263   | 212   | 215   | 204   | 370   | 288   | 233   | 238   | 172   | 203   | Jade2    |         |
| Jade3    | 2330  | 1867  | 1967  | 2257  | 2644  | 2469  | 2626  | 2836  | 2315  | 2477  | 2283  | 2633  | 2430  | 2663  | 2362  | 2048  | 2256  | 2122  | 2430  | 2439  | 2335  | 2854  | 2150  | 2453  | 2759  | 2399  | 2398  | 2593  | Jade3    |         |
| Jag1     | 3223  | 3445  | 4730  | 4204  | 3800  | 3454  | 2883  | 3556  | 3300  | 3916  | 3722  | 4246  | 5125  | 4224  | 3200  | 3958  | 4109  | 4031  | 3565  | 3140  | 3363  | 3850  | 3698  | 3836  | 3542  | 3587  | 4788  | 4679  | Jag1     |         |
| Jag2     | 3052  | 3798  | 4350  | 4606  | 4453  | 3947  | 3045  | 2334  | 2919  | 3244  | 3065  | 2342  | 2647  | 1895  | 2682  | 3810  | 4390  | 4152  | 4390  | 3385  | 3311  | 3146  | 2754  | 3027  | 2882  | 2346  | 2017  | 1804  | Jag2     |         |
| Jag11    | 1564  | 1664  | 1655  | 1418  | 1546  | 1409  | 1535  | 1864  | 1764  | 1517  | 1507  | 1670  | 1548  | 1669  | 1691  | 1453  | 1627  | 1392  | 1499  | 1619  | 1513  | 1686  | 1604  | 1570  | 1546  | 1845  | 1764  | 1716  | Jag11    |         |
| Jak1     | 12115 | 10811 | 9456  | 9543  | 10179 | 9725  | 8993  | 8877  | 9095  | 8335  | 9433  | 6698  | 7743  | 6537  | 7173  | 12016 | 9371  | 10289 | 8701  | 8867  | 9408  | 8494  | 10153 | 7158  | 7456  | 6518  | 7161  | 6874  | Jak1     |         |
| Jak2     | 7841  | 6151  | 6141  | 6553  | 8040  | 8217  | 9475  | 7984  | 6716  | 6366  | 5722  | 5787  | 5159  | 6311  | 7920  | 6442  | 6449  | 6984  | 7838  | 8493  | 8614  | 7807  | 6436  | 6072  | 6920  | 4889  | 5406  | 5629  | Jak2     |         |
| Jak3     | 278   | 405   | 466   | 326   | 408   | 265   | 246   | 223   | 328   | 357   | 411   | 326   | 354   | 270   | 298   | 386   | 309   | 359   | 317   | 277   | 284   | 398   | 357   | 360   | 347   | 372   | 335   | 263   | Jak3     |         |
| Jakmp1   | 51    | 74    | 61    | 118   | 113   | 68    | 105   | 72    | 60    | 113   | 74    | 41    | 40    | 50    | 86    | 51    | 92    | 94    | 122   | 86    | 131   | 92    | 54    | 74    | 113   | 41    | 35    | 42    | Jakmp1   |         |
| Jakmp2   | 4392  | 5443  | 3886  | 5241  | 6198  | 6017  | 6220  | 6653  | 5281  | 5047  | 4387  | 5703  | 5044  | 5586  | 5851  | 4358  | 5055  | 5051  | 6007  | 7318  | 6324  | 5556  | 4944  | 4799  | 5967  | 4274  | 5407  | 4917  | Jakmp2   |         |
| Jakmp3   | 5     | 2     | 2     | 13    | 35    | 2     | 6     | 6     | 6     | 19    | 4     | 4     | 15    | 3     | 1     | 5     | 2     | 12    | 3     | 1     | 11    | 35    | 12    | 4     | 13    | 3     | 6     | 6     | Jakmp3   |         |
| Jam2     | 5973  | 6369  | 6797  | 5273  | 5934  | 6105  | 6391  | 7477  | 5116  | 5392  | 4601  | 8429  | 8108  | 8496  | 7482  | 5828  | 6594  | 5209  | 6053  | 6933  | 6044  | 6577  | 5340  | 5963  | 5985  | 6361  | 9687  | 9320  | Jam2     |         |
| Jam3     | 7835  | 8631  | 8240  | 7698  | 6384  | 6938  | 7679  | 6260  | 5500  | 5437  | 5927  | 7424  | 7160  | 7597  | 8389  | 7957  | 8017  | 7065  | 7003  | 8164  | 6861  | 5491  | 5730  | 6056  | 5807  | 7933  | 8220  | 7987  | Jam3     |         |
| Jam1     | 1     | 1     | 0     | 2     | 0     | 2     | 0     | 4     | 12    | 15    | 12    | 8     | 14    | 5     | 1     | 3     | 2     | 3     | 5     | 2     | 1     | 15    | 10    | 3     | 6     | 2     | 8     | 13    | Jam1     |         |
| Jarid2   | 12843 | 12929 | 14771 | 14526 | 12297 | 12497 | 12569 | 10179 | 8960  | 10986 | 10515 | 11535 | 11834 | 11663 | 12591 | 12723 | 14857 | 13201 | 12432 | 11168 | 12088 | 11334 | 8922  | 10569 | 11035 | 10173 | 11537 | 11345 | Jarid2   |         |
| Jazf1    | 446   | 334   | 387   | 421   | 703   | 537   | 536   | 1012  | 1093  | 1071  | 1118  | 782   | 697   | 808   | 431   | 444   | 413   | 492   | 655   | 549   | 593   | 1440  | 991   | 891   | 1205  | 618   | 638   | 726   | Jazf1    |         |
| Jcad     | 4038  | 3960  | 3761  | 3083  | 3613  | 3683  | 2894  | 2628  | 2950  | 2759  | 3865  | 2758  | 3337  | 2624  | 3763  | 4629  | 3013  | 3739  | 3120  | 3349  | 3205  | 3292  | 3921  | 2530  | 3262  | 2090  | 2914  | 2725  | Jcad     |         |
| Jchain   | 21    | 24    | 42    | 30    | 45    | 49    | 54    | 29    | 33    | 54    | 52    | 54    | 40    | 57    | 40    | 19    | 75    | 63    | 29    | 30    | 41    | 57    | 16    | 56    | 42    | 53    | 34    | 44    | Jchain   |         |
| Jdp2     | 290   | 371   | 424   | 357   | 384   | 366   | 210   | 318   | 503   | 539   | 730   | 332   | 422   | 384   | 324   | 408   | 330   | 371   | 318   | 279   | 234   | 475   | 555   | 496   | 431   | 398   | 368   | 360   | Jdp2     |         |
| Jhy      | 36    | 43    | 54    | 42    | 72    | 56    | 39    | 110   | 92    | 95    | 83    | 96    | 174   | 101   | 63    | 63    | 59    | 26    | 44    | 50    | 46    | 109   | 102   | 48    | 92    | 51    | 108   | 107   | Jhy      |         |
| Jkamp    | 3846  | 3558  | 3581  | 4165  | 4058  | 4024  | 4552  | 4412  | 3720  | 3789  | 3532  | 3746  | 3895  | 4061  | 4243  | 3878  | 3961  | 4175  | 4087  | 4687  | 4370  | 4134  | 3816  | 3755  | 3889  | 3803  | 4054  | 4133  | Jkamp    |         |
| Jmj1c    | 7770  | 6531  | 1566  | 4255  | 5131  | 6898  | 6122  | 7746  | 7448  | 4816  | 5200  | 4845  | 5089  | 4981  | 7528  | 6382  | 2792  | 4274  | 4630  | 7718  | 6768  | 3664  | 6717  | 2881  | 5262  | 963   | 5606  |       |          |         |



|         |       |       |       |       |       |       |       |       |       |       |       |       |       |       |       |       |       |       |       |       |       |       |       |       |       |       |       |        |         |        |
|---------|-------|-------|-------|-------|-------|-------|-------|-------|-------|-------|-------|-------|-------|-------|-------|-------|-------|-------|-------|-------|-------|-------|-------|-------|-------|-------|-------|--------|---------|--------|
| Kars    | 14589 | 16330 | 15397 | 13560 | 11729 | 12646 | 12275 | 9789  | 10499 | 9853  | 9660  | 11337 | 10680 | 11573 | 13979 | 15182 | 14296 | 13288 | 13503 | 13920 | 12649 | 8589  | 10172 | 10776 | 9991  | 14001 | 12149 | 12067  | Kars    |        |
| Kash5   | 63    | 70    | 122   | 85    | 51    | 62    | 48    | 67    | 95    | 64    | 105   | 97    | 78    | 98    | 71    | 80    | 131   | 45    | 72    | 59    | 48    | 85    | 85    | 99    | 86    | 110   | 110   | 121    | Kash5   |        |
| Kat14   | 1757  | 1802  | 2237  | 1701  | 1726  | 1682  | 1642  | 2499  | 2502  | 2619  | 2627  | 3222  | 2880  | 3158  | 1617  | 1795  | 1983  | 1766  | 1795  | 1409  | 1642  | 2446  | 2410  | 2968  | 2663  | 3346  | 2984  | 3297   | Kat14   |        |
| Kat2a   | 2124  | 2771  | 3358  | 3207  | 3307  | 2844  | 2684  | 3491  | 3968  | 4546  | 4256  | 4845  | 4223  | 4251  | 2230  | 2545  | 3486  | 3182  | 3437  | 2489  | 2865  | 4182  | 3941  | 4551  | 4247  | 5618  | 4014  | 4322   | Kat2a   |        |
| Kat2b   | 1338  | 1040  | 1219  | 1298  | 1794  | 1670  | 1643  | 2859  | 2469  | 2342  | 2183  | 2586  | 2174  | 2504  | 1369  | 1005  | 1203  | 1210  | 1785  | 1576  | 1629  | 2724  | 2255  | 2373  | 2722  | 2152  | 2335  | 2387   | Kat2b   |        |
| Kat5    | 1776  | 1937  | 2103  | 1987  | 2165  | 2176  | 2143  | 3896  | 4182  | 4119  | 3690  | 4524  | 4149  | 4336  | 1960  | 1791  | 2160  | 2040  | 2378  | 2269  | 2103  | 3917  | 3903  | 4287  | 4333  | 4800  | 4558  | 4138   | Kat5    |        |
| Kat6a   | 15331 | 15247 | 11391 | 17489 | 17763 | 17972 | 18418 | 17531 | 16576 | 18287 | 17330 | 19683 | 18185 | 20665 | 14781 | 14094 | 14302 | 17792 | 16892 | 15146 | 19305 | 17179 | 14934 | 16263 | 20460 | 10778 | 19253 | 18830  | Kat6a   |        |
| Kat6b   | 3788  | 3726  | 2977  | 4657  | 5046  | 4988  | 5740  | 9979  | 11493 | 12047 | 12267 | 12166 | 11687 | 13206 | 3533  | 3214  | 3905  | 4784  | 5365  | 4932  | 5484  | 9613  | 9916  | 12272 | 13316 | 7868  | 11436 | 11331  | Kat6b   |        |
| Kat7    | 4954  | 4434  | 4810  | 4018  | 4392  | 4304  | 4805  | 5816  | 5779  | 5444  | 5193  | 6244  | 6018  | 6326  | 4834  | 3916  | 4755  | 4006  | 4949  | 4436  | 4629  | 5872  | 5538  | 5990  | 5749  | 6841  | 6185  | 6556   | Kat7    |        |
| Kat8    | 1640  | 2014  | 1886  | 1864  | 1784  | 1666  | 1786  | 2067  | 2108  | 2062  | 1895  | 2120  | 1886  | 2098  | 1820  | 1727  | 1990  | 1651  | 1944  | 1895  | 1724  | 1953  | 1996  | 2286  | 2127  | 2383  | 2206  | 2194   | Kat8    |        |
| Katna1  | 0     | 3     | 2     | 0     | 2     | 1     | 2     | 2     | 0     | 3     | 1     | 0     | 0     | 1     | 4     | 2     | 6     | 3     | 1     | 1     | 1     | 0     | 2     | 1     | 8     | 3     | 7     | 0      | Katna1  |        |
| Katna1  | 1602  | 1513  | 1635  | 2035  | 2029  | 1810  | 2017  | 3232  | 3161  | 3812  | 3183  | 3874  | 3459  | 4158  | 1597  | 1698  | 2042  | 1881  | 1886  | 1686  | 2014  | 4072  | 2895  | 3936  | 4146  | 3266  | 3840  | 3953   | Katna1  |        |
| Katna2  | 880   | 1018  | 1135  | 1054  | 945   | 818   | 984   | 928   | 812   | 890   | 780   | 1287  | 1077  | 1245  | 984   | 893   | 1161  | 919   | 899   | 918   | 948   | 862   | 823   | 956   | 974   | 1321  | 1432  | 1272   | Katna2  |        |
| Katnb1  | 3851  | 5326  | 4244  | 5055  | 4364  | 4339  | 4078  | 2031  | 2497  | 2618  | 2354  | 2834  | 2490  | 2463  | 3752  | 4345  | 4687  | 4555  | 5133  | 4132  | 4114  | 2491  | 2242  | 2624  | 2904  | 2904  | 2622  | 2439   | Katnb1  |        |
| Katnbl1 | 2996  | 1905  | 2769  | 2779  | 2708  | 2722  | 3387  | 3079  | 2274  | 2200  | 2562  | 2739  | 2692  | 3147  | 3022  | 2558  | 2545  | 2529  | 2612  | 3146  | 2979  | 2780  | 2539  | 2611  | 2682  | 2959  | 2798  | 3072   | Katnbl1 |        |
| Katnlp  | 4630  | 5188  | 3577  | 4624  | 3956  | 4125  | 4275  | 3181  | 3447  | 3090  | 2936  | 3385  | 3264  | 4283  | 4887  | 3868  | 4449  | 4190  | 3962  | 4312  | 3038  | 3461  | 2993  | 3256  | 2619  | 3570  | 3222  | Katnlp |         |        |
| Kazald1 | 110   | 114   | 90    | 102   | 93    | 107   | 75    | 131   | 213   | 116   | 232   | 30    | 100   | 37    | 141   | 104   | 103   | 121   | 99    | 72    | 55    | 170   | 197   | 105   | 114   | 55    | 34    | 32     | Kazald1 |        |
| Kazn    | 126   | 154   | 88    | 536   | 218   | 331   | 102   | 110   | 105   | 223   | 334   | 226   | 92    | 330   | 390   | 132   | 246   | 92    | 436   | 133   | 204   | 363   | 174   | 257   | 118   | 121   | 181   | 103    | Kazn    |        |
| Kbtbd11 | 2136  | 2476  | 2953  | 2992  | 3989  | 3520  | 3429  | 4522  | 4280  | 4979  | 4130  | 5048  | 5380  | 5122  | 2718  | 2358  | 3307  | 3223  | 3910  | 3150  | 3673  | 4518  | 3864  | 5000  | 5488  | 4026  | 4500  | 5005   | Kbtbd11 |        |
| Kbtbd12 | 2     | 1     | 0     | 1     | 1     | 12    | 4     | 2     | 14    | 14    | 19    | 8     | 11    | 6     | 3     | 1     | 0     | 0     | 1     | 3     | 5     | 3     | 10    | 7     | 7     | 12    | 2     | 4      | Kbtbd12 |        |
| Kbtbd13 | 32    | 22    | 30    | 21    | 25    | 28    | 21    | 44    | 67    | 40    | 78    | 36    | 59    | 29    | 38    | 39    | 19    | 32    | 16    | 19    | 26    | 53    | 60    | 46    | 53    | 61    | 34    | 49     | Kbtbd13 |        |
| Kbtbd2  | 3651  | 3197  | 3689  | 3727  | 3977  | 3663  | 3862  | 5145  | 4294  | 4079  | 4369  | 4757  | 4488  | 4840  | 3688  | 2996  | 3531  | 3815  | 4057  | 3790  | 3828  | 5000  | 4112  | 4762  | 5035  | 5145  | 4767  | 4968   | Kbtbd2  |        |
| Kbtbd3  | 744   | 557   | 553   | 563   | 557   | 568   | 689   | 656   | 504   | 422   | 533   | 534   | 551   | 524   | 847   | 704   | 546   | 559   | 507   | 782   | 684   | 478   | 557   | 494   | 511   | 489   | 635   | 553    | Kbtbd3  |        |
| Kbtbd6  | 415   | 373   | 518   | 459   | 389   | 438   | 440   | 315   | 299   | 335   | 230   | 430   | 330   | 429   | 447   | 399   | 460   | 474   | 481   | 384   | 527   | 254   | 265   | 412   | 342   | 552   | 399   | 479    | Kbtbd6  |        |
| Kbtbd7  | 3216  | 2352  | 3606  | 3865  | 4187  | 3946  | 4594  | 4085  | 3488  | 3660  | 3682  | 3712  | 3687  | 4015  | 3434  | 3027  | 3854  | 4006  | 4359  | 3536  | 4479  | 4375  | 3366  | 3900  | 4136  | 3975  | 3498  | 3796   | Kbtbd7  |        |
| Kbtbd8  | 1694  | 1665  | 1789  | 1888  | 1472  | 1565  | 1605  | 1542  | 1093  | 937   | 932   | 1340  | 1108  | 1323  | 2036  | 1854  | 1703  | 1654  | 1564  | 2019  | 1522  | 1110  | 1014  | 1102  | 1146  | 1401  | 1396  | 1333   | Kbtbd8  |        |
| Kcmf1   | 3610  | 3429  | 3925  | 3732  | 3885  | 3750  | 4289  | 4940  | 4538  | 4558  | 4621  | 4986  | 4557  | 5318  | 3683  | 3269  | 3710  | 3712  | 4158  | 3865  | 4176  | 4669  | 4539  | 4725  | 4560  | 5249  | 4853  | 5542   | Kcmf1   |        |
| Kcna1   | 520   | 417   | 392   | 471   | 628   | 526   | 472   | 247   | 298   | 257   | 359   | 149   | 273   | 160   | 516   | 495   | 391   | 486   | 498   | 505   | 513   | 324   | 282   | 151   | 307   | 29    | 173   | 192    | Kcna1   |        |
| Kcna10  | 0     | 1     | 0     | 0     | 1     | 0     | 0     | 0     | 0     | 4     | 0     | 0     | 0     | 0     | 1     | 0     | 0     | 2     | 1     | 1     | 0     | 0     | 0     | 0     | 0     | 0     | 0     | 0      | 0       | Kcna10 |
| Kcna2   | 1020  | 1167  | 709   | 1472  | 2555  | 2045  | 1895  | 1653  | 1446  | 1571  | 1625  | 874   | 1236  | 994   | 1477  | 1026  | 1079  | 1478  | 1697  | 1935  | 2003  | 1711  | 1396  | 847   | 1588  | 441   | 1026  | 781    | Kcna2   |        |
| Kcna3   | 487   | 578   | 91    | 488   | 568   | 765   | 688   | 553   | 565   | 383   | 394   | 488   | 302   | 483   | 440   | 359   | 260   | 447   | 535   | 848   | 799   | 311   | 392   | 308   | 614   | 40    | 467   | 273    | Kcna3   |        |
| Kcna4   | 337   | 336   | 328   | 330   | 442   | 373   | 260   | 354   | 355   | 379   | 359   | 279   | 384   | 329   | 364   | 308   | 353   | 386   | 385   | 436   | 376   | 446   | 384   | 245   | 335   | 102   | 309   | 368    | Kcna4   |        |
| Kcna5   | 174   | 129   | 185   | 133   | 186   | 122   | 116   | 245   | 258   | 245   | 365   | 196   | 198   | 204   | 149   | 121   | 137   | 107   | 147   | 96    | 127   | 211   | 328   | 286   | 175   | 259   | 207   | 231    | Kcna5   |        |
| Kcna6   | 2759  | 2910  | 3195  | 2971  | 4268  | 3578  | 3096  | 1833  | 2085  | 2269  | 2480  | 1372  | 1982  | 1422  | 2873  | 2998  | 3259  | 3693  | 3563  | 2555  | 3545  | 2914  | 1721  | 1476  | 2140  | 1436  | 1538  | 1380   | Kcna6   |        |
| Kcna7   | 5     | 3     | 5     | 9     | 4     | 6     | 1     | 0     | 0     | 0     | 0     | 0     | 1     | 0     | 3     | 5     | 0     | 4     | 1     | 4     | 0     | 0     | 0     | 0     | 4     | 0     | 2     | 2      | Kcna7   |        |
| KcnaB1  | 260   | 250   | 288   | 143   | 314   | 261   | 143   | 368   | 411   | 449   | 497   | 341   | 489   | 349   | 392   | 419   | 251   | 254   | 164   | 196   | 148   | 478   | 562   | 275   | 362   | 235   | 558   | 479    | KcnaB1  |        |
| KcnaB2  | 2440  | 3206  | 3535  | 3906  | 3715  | 3356  | 2973  | 1272  | 1563  | 1598  | 1866  | 1578  | 1755  | 1325  | 2293  | 2602  | 3756  | 3688  | 3991  | 2859  | 3271  | 1980  | 1479  | 1481  | 1941  | 1603  | 1475  | 1518   | KcnaB2  |        |
| KcnaB3  | 1485  | 1649  | 1894  | 2059  | 1777  | 1584  | 1942  | 372   | 384   | 469   | 419   | 504   | 403   | 521   | 1352  | 1389  | 2052  | 2002  | 1894  | 1500  | 1865  | 531   | 334   | 517   | 544   | 520   | 423   | 458    | KcnaB3  |        |
| KcnaB1  | 1727  | 1748  | 1557  | 2349  | 3023  | 2545  | 2704  | 1551  | 1657  | 1805  | 1826  | 1346  | 1419  | 1292  | 1644  | 1650  | 2150  | 2540  | 2836  | 2317  | 2873  | 2100  | 1436  | 1664  | 1917  | 1070  | 1293  | 1254   | KcnaB1  |        |
| KcnaB2  | 383   | 275   | 192   | 360   | 708   | 692   | 616   | 1791  | 1681  | 1211  | 1281  | 876   | 899   | 994   | 514   | 450   | 279   | 384   | 408   | 705   | 625   | 1462  | 1495  | 997   | 1438  | 528   | 940   | 851    | KcnaB2  |        |
| Kcnc1   | 1416  | 2160  | 2067  | 3880  | 5375  | 4213  | 4361  | 1983  | 2178  | 3117  | 2568  | 2347  | 1858  | 2183  | 1931  | 1772  | 3668  | 4504  | 4923  | 3371  | 4694  | 3599  | 1880  | 2491  | 3586  | 1214  | 1749  | 1765   | Kcnc1   |        |
| Kcnc2   | 261   | 179   | 267   | 337   | 539   | 380   | 468   | 455   | 425   | 517   | 478   | 321   | 281   | 354   | 299   | 220   | 345   | 363   | 414   | 384   | 446   | 622   | 441   | 373   | 464   | 221   | 367   | 343    | Kcnc2   |        |
| Kcnc3   | 5728  | 8424  | 8808  | 11660 | 9442  | 7996  | 7519  | 1305  | 1328  | 2288  | 1686  | 1718  | 1609  | 1657  | 5683  | 6797  | 9853  | 10837 | 9664  | 6543  | 8444  | 2440  | 1158  | 1937  | 2039  | 1375  | 1578  | 1686   | Kcnc3   |        |
| Kcnc4   | 191   | 248   | 233   | 358   | 597   | 410   | 327   | 178   | 231   | 320   | 243   | 113   | 125   | 88    | 171   | 261   | 238   | 447   | 457   | 352   | 454   | 386   | 221   | 182   | 287   | 75    | 59    | 71     | Kcnc4   |        |
| KcncD1  | 736   | 962   | 858   | 1049  | 935   | 824   | 884   | 480   | 552   | 629   | 570   | 553   | 612   | 536   | 783   | 829   | 969   | 1076  | 917   | 710   | 819   | 775   | 499   | 525   | 584   | 497   | 443   | 515    | KcncD1  |        |
| KcncD2  | 647   | 568   | 570   | 1047  | 1885  | 1555  | 1577  | 1573  | 1475  | 1573  | 1550  | 1249  | 1098  | 1343  | 829   | 539   | 856   | 1149  | 1404  | 1477  | 1625  | 2207  | 1524  | 1380  | 1858  | 1122  | 1109  | 1314   | KcncD2  |        |
| KcncD3  | 1389  | 1477  | 1230  | 2496  | 3854  | 3742  | 3629  | 4653  | 4387  | 4792  | 3986  | 3814  | 3957  | 4067  | 1970  | 1502  | 2128  | 2836  | 3399  | 3411  | 3969  | 5972  | 3658  | 3860  | 5704  | 1915  | 3267  | 3048   | KcncD3  |        |
| Kcne1   | 30    | 20    | 24    | 6     | 2     | 4     | 10    | 7     | 7     | 4     | 5     | 7     | 2     | 0     | 16    | 19    | 21    | 12    | 5     | 6     | 8     | 7     | 5     | 1     | 2     | 2     | 5     | 6      | Kcne1   |        |
| Kcne11  | 316   | 421   | 372   | 283   | 398   | 363   | 324   | 458   | 598   | 536   | 830   | 349   |       |       |       |       |       |       |       |       |       |       |       |       |       |       |       |        |         |        |

|         |       |      |       |      |       |       |       |       |       |       |       |       |       |       |       |       |      |       |       |       |       |       |       |       |       |       |       |       |         |
|---------|-------|------|-------|------|-------|-------|-------|-------|-------|-------|-------|-------|-------|-------|-------|-------|------|-------|-------|-------|-------|-------|-------|-------|-------|-------|-------|-------|---------|
| Kcnj4   | 141   | 187  | 182   | 161  | 165   | 122   | 105   | 2     | 30    | 25    | 4     | 18    | 3     | 5     | 133   | 182   | 172  | 196   | 163   | 131   | 134   | 23    | 11    | 11    | 14    | 10    | 12    | 11    | Kcnj4   |
| Kcnj5   | 67    | 54   | 59    | 64   | 153   | 131   | 124   | 219   | 184   | 229   | 208   | 215   | 120   | 200   | 69    | 72    | 87   | 97    | 118   | 165   | 124   | 177   | 194   | 279   | 267   | 249   | 195   | 189   | Kcnj5   |
| Kcnj6   | 23    | 41   | 20    | 57   | 140   | 102   | 63    | 115   | 111   | 98    | 112   | 45    | 60    | 52    | 41    | 26    | 20   | 52    | 93    | 115   | 113   | 124   | 124   | 62    | 178   | 8     | 46    | 38    | Kcnj6   |
| Kcnj8   | 58    | 61   | 112   | 55   | 182   | 120   | 102   | 342   | 410   | 468   | 522   | 436   | 395   | 412   | 45    | 51    | 108  | 74    | 154   | 108   | 130   | 418   | 551   | 503   | 506   | 422   | 370   | 388   | Kcnj8   |
| Kcnj9   | 233   | 342  | 388   | 539  | 502   | 567   | 526   | 238   | 247   | 315   | 289   | 422   | 305   | 386   | 302   | 227   | 505  | 522   | 507   | 527   | 587   | 319   | 245   | 381   | 418   | 308   | 380   | 320   | Kcnj9   |
| Kcnk1   | 535   | 383  | 314   | 290  | 361   | 313   | 245   | 361   | 537   | 395   | 510   | 237   | 299   | 250   | 434   | 468   | 249  | 317   | 289   | 266   | 291   | 369   | 533   | 373   | 272   | 378   | 249   | 274   | Kcnk1   |
| Kcnk10  | 1722  | 1732 | 2205  | 2171 | 2410  | 2405  | 2501  | 3328  | 2588  | 2979  | 2448  | 4026  | 2799  | 4041  | 1934  | 1239  | 2363 | 1892  | 2646  | 2665  | 2668  | 3832  | 2262  | 3517  | 3973  | 3365  | 4102  | 4124  | Kcnk10  |
| Kcnk12  | 16    | 16   | 36    | 37   | 37    | 29    | 21    | 39    | 21    | 8     | 23    | 17    | 11    | 10    | 18    | 9     | 20   | 22    | 48    | 22    | 36    | 23    | 25    | 28    | 34    | 10    | 6     | 15    | Kcnk12  |
| Kcnk13  | 62    | 34   | 116   | 73   | 91    | 47    | 110   | 32    | 36    | 25    | 105   | 46    | 46    | 40    | 78    | 67    | 72   | 92    | 64    | 84    | 82    | 28    | 85    | 36    | 23    | 37    | 49    | 32    | Kcnk13  |
| Kcnk15  | 1     | 0    | 3     | 1    | 3     | 3     | 1     | 0     | 0     | 0     | 0     | 1     | 0     | 0     | 7     | 3     | 0    | 4     | 2     | 4     | 1     | 0     | 2     | 2     | 4     | 0     | 2     | 0     | Kcnk15  |
| Kcnk16  | 0     | 2    | 0     | 0    | 0     | 0     | 0     | 0     | 1     | 0     | 6     | 0     | 0     | 0     | 0     | 0     | 0    | 0     | 0     | 0     | 0     | 2     | 2     | 0     | 0     | 0     | 0     | 0     | Kcnk16  |
| Kcnk18  | 0     | 2    | 0     | 0    | 2     | 1     | 0     | 0     | 1     | 0     | 0     | 0     | 0     | 0     | 0     | 1     | 2    | 0     | 0     | 0     | 0     | 0     | 2     | 1     | 0     | 0     | 0     | 0     | Kcnk18  |
| Kcnk2   | 486   | 444  | 673   | 587  | 1055  | 872   | 789   | 1955  | 2066  | 2272  | 2011  | 1863  | 1860  | 1910  | 496   | 445   | 613  | 637   | 951   | 835   | 775   | 2186  | 2360  | 2309  | 2297  | 2005  | 1902  | 1761  | Kcnk2   |
| Kcnk3   | 53    | 100  | 59    | 144  | 388   | 176   | 161   | 180   | 223   | 246   | 270   | 96    | 144   | 89    | 116   | 79    | 89   | 212   | 251   | 201   | 225   | 304   | 214   | 118   | 251   | 73    | 71    | 69    | Kcnk3   |
| Kcnk4   | 42    | 50   | 77    | 76   | 107   | 83    | 65    | 22    | 22    | 34    | 36    | 12    | 11    | 24    | 62    | 54    | 71   | 98    | 83    | 71    | 79    | 33    | 20    | 23    | 26    | 16    | 15    | 12    | Kcnk4   |
| Kcnk5   | 1283  | 1698 | 1518  | 1398 | 809   | 1019  | 1002  | 474   | 508   | 550   | 441   | 760   | 798   | 740   | 1122  | 1445  | 1393 | 1148  | 1068  | 1112  | 877   | 349   | 491   | 619   | 471   | 1076  | 908   | 827   | Kcnk5   |
| Kcnk6   | 217   | 184  | 246   | 138  | 126   | 196   | 107   | 233   | 316   | 220   | 592   | 220   | 236   | 184   | 183   | 237   | 192  | 211   | 106   | 134   | 124   | 302   | 364   | 235   | 216   | 231   | 231   | 173   | Kcnk6   |
| Kcnk7   | 1     | 3    | 2     | 5    | 7     | 0     | 0     | 0     | 2     | 2     | 3     | 2     | 2     | 2     | 4     | 8     | 1    | 7     | 1     | 3     | 0     | 0     | 3     | 0     | 1     | 2     | 2     | 0     | Kcnk7   |
| Kcnk9   | 333   | 366  | 291   | 833  | 2249  | 1198  | 950   | 1784  | 1862  | 2248  | 2105  | 781   | 1621  | 744   | 600   | 511   | 571  | 1169  | 1026  | 1124  | 1193  | 2602  | 1889  | 829   | 1562  | 211   | 775   | 694   | Kcnk9   |
| Kcnm1   | 1203  | 1331 | 740   | 2240 | 3938  | 3362  | 3386  | 2978  | 2782  | 2800  | 3089  | 1527  | 1787  | 1541  | 1854  | 1615  | 1254 | 2648  | 2546  | 3324  | 3747  | 3562  | 2630  | 1554  | 2982  | 690   | 1355  | 1161  | Kcnm1   |
| Kcnmb1  | 7     | 11   | 27    | 5    | 7     | 11    | 9     | 27    | 16    | 13    | 15    | 13    | 34    | 4     | 7     | 13    | 12   | 3     | 7     | 15    | 9     | 15    | 16    | 9     | 6     | 18    | 23    | 12    | Kcnmb1  |
| Kcnmb2  | 242   | 228  | 168   | 166  | 367   | 203   | 187   | 635   | 556   | 502   | 563   | 254   | 553   | 226   | 405   | 381   | 204  | 201   | 161   | 242   | 194   | 734   | 469   | 278   | 442   | 176   | 265   | 221   | Kcnmb2  |
| Kcnmb3  | 2     | 2    | 6     | 0    | 4     | 0     | 2     | 0     | 1     | 1     | 3     | 0     | 0     | 0     | 4     | 2     | 0    | 0     | 0     | 2     | 8     | 2     | 0     | 1     | 3     | 2     | 0     | 0     | Kcnmb3  |
| Kcnmb4  | 549   | 669  | 585   | 655  | 814   | 606   | 593   | 1018  | 1046  | 1147  | 1168  | 1077  | 1131  | 923   | 633   | 678   | 621  | 680   | 595   | 493   | 585   | 1151  | 1043  | 1034  | 1133  | 1071  | 953   | 940   | Kcnmb4  |
| Kcnn1   | 704   | 1011 | 820   | 904  | 758   | 746   | 667   | 812   | 752   | 853   | 720   | 1150  | 940   | 874   | 719   | 741   | 976  | 880   | 921   | 804   | 671   | 897   | 695   | 1026  | 1077  | 883   | 1109  | 992   | Kcnn1   |
| Kcnn2   | 585   | 651  | 497   | 634  | 749   | 727   | 872   | 658   | 687   | 691   | 609   | 570   | 387   | 559   | 699   | 600   | 683  | 735   | 776   | 721   | 936   | 553   | 512   | 628   | 740   | 486   | 389   | 399   | Kcnn2   |
| Kcnn3   | 2820  | 2870 | 1639  | 3116 | 3649  | 3686  | 3884  | 1396  | 1367  | 1245  | 1498  | 786   | 971   | 800   | 3001  | 2881  | 2135 | 3548  | 2990  | 3437  | 4211  | 1394  | 1530  | 842   | 1314  | 451   | 705   | 571   | Kcnn3   |
| Kcnn4   | 14    | 22   | 20    | 13   | 16    | 12    | 10    | 22    | 58    | 27    | 33    | 36    | 64    | 33    | 15    | 24    | 10   | 9     | 20    | 15    | 8     | 22    | 36    | 15    | 18    | 46    | 52    | 107   | Kcnn4   |
| Kcnnq1  | 68    | 55   | 72    | 53   | 79    | 44    | 38    | 55    | 73    | 69    | 48    | 68    | 70    | 48    | 47    | 65    | 34   | 46    | 64    | 40    | 55    | 72    | 71    | 60    | 76    | 73    | 88    | 64    | Kcnnq1  |
| Kcnnq2  | 4858  | 6179 | 4059  | 8184 | 13565 | 11163 | 10515 | 13814 | 13475 | 15532 | 13164 | 12200 | 11746 | 11729 | 6253  | 5114  | 7214 | 9384  | 11676 | 10157 | 11721 | 19041 | 11441 | 11466 | 18037 | 5919  | 11405 | 10325 | Kcnnq2  |
| Kcnnq3  | 1227  | 1330 | 756   | 1777 | 2943  | 2818  | 2977  | 3626  | 3681  | 3415  | 2823  | 2583  | 2690  | 2617  | 1688  | 1391  | 1137 | 1929  | 2392  | 2726  | 3455  | 3390  | 3178  | 2396  | 4061  | 1914  | 2418  | 1988  | Kcnnq3  |
| Kcnnq4  | 498   | 615  | 681   | 505  | 642   | 648   | 432   | 530   | 760   | 799   | 755   | 570   | 687   | 537   | 508   | 654   | 594  | 592   | 520   | 341   | 461   | 762   | 839   | 668   | 600   | 520   | 608   | 506   | Kcnnq4  |
| Kcnnq5  | 215   | 159  | 139   | 112  | 230   | 214   | 168   | 390   | 516   | 403   | 530   | 213   | 324   | 255   | 223   | 280   | 140  | 188   | 169   | 115   | 196   | 429   | 378   | 323   | 326   | 251   | 286   | 239   | Kcnnq5  |
| Kcnrg   | 261   | 249  | 180   | 296  | 347   | 335   | 360   | 227   | 167   | 175   | 155   | 164   | 142   | 161   | 301   | 189   | 191  | 329   | 305   | 370   | 424   | 224   | 166   | 161   | 223   | 133   | 145   | 146   | Kcnrg   |
| Kcns1   | 60    | 84   | 81    | 64   | 56    | 117   | 29    | 48    | 101   | 101   | 153   | 37    | 76    | 37    | 51    | 41    | 65   | 80    | 51    | 26    | 33    | 109   | 96    | 66    | 78    | 50    | 53    | 26    | Kcns1   |
| Kcns2   | 60    | 17   | 14    | 31   | 115   | 47    | 54    | 125   | 124   | 192   | 140   | 43    | 26    | 26    | 36    | 43    | 27   | 30    | 84    | 65    | 71    | 149   | 113   | 105   | 151   | 64    | 24    | 38    | Kcns2   |
| Kcns3   | 39    | 24   | 33    | 29   | 48    | 28    | 25    | 37    | 73    | 53    | 105   | 20    | 45    | 37    | 44    | 49    | 34   | 23    | 23    | 49    | 34    | 74    | 73    | 44    | 32    | 35    | 21    | 17    | Kcns3   |
| Kcnn1   | 431   | 669  | 378   | 1039 | 2110  | 1330  | 1355  | 1056  | 1316  | 1619  | 1334  | 781   | 821   | 834   | 688   | 557   | 791  | 1241  | 1361  | 1184  | 1356  | 1988  | 1141  | 1043  | 1605  | 462   | 751   | 592   | Kcnn1   |
| Kcnn2   | 464   | 355  | 491   | 529  | 611   | 662   | 753   | 474   | 503   | 371   | 437   | 516   | 464   | 545   | 471   | 486   | 413  | 532   | 529   | 554   | 708   | 622   | 496   | 481   | 550   | 375   | 453   | 482   | Kcnn2   |
| Kcnnv1  | 47    | 72   | 15    | 82   | 121   | 111   | 94    | 162   | 190   | 175   | 138   | 125   | 110   | 118   | 95    | 50    | 74   | 79    | 97    | 119   | 100   | 184   | 174   | 138   | 174   | 86    | 112   | 75    | Kcnnv1  |
| Kcnv1   | 83    | 74   | 86    | 115  | 246   | 141   | 208   | 305   | 301   | 234   | 243   | 127   | 160   | 154   | 78    | 69    | 104  | 146   | 243   | 238   | 234   | 261   | 179   | 325   | 108   | 119   | 132   | Kcnv1 |         |
| Kcnv2   | 3     | 19   | 0     | 6    | 13    | 6     | 7     | 45    | 35    | 33    | 22    | 22    | 40    | 15    | 9     | 16    | 1    | 7     | 7     | 5     | 0     | 33    | 45    | 11    | 3     | 12    | 26    | 17    | Kcnv2   |
| Kcp     | 2065  | 1909 | 2119  | 1736 | 2204  | 1953  | 1214  | 1794  | 2210  | 2378  | 2827  | 2076  | 2707  | 1722  | 1462  | 2703  | 1949 | 1968  | 1634  | 1160  | 1271  | 2520  | 2391  | 2181  | 1897  | 1839  | 2078  | 1824  | Kcp     |
| Kctd1   | 1222  | 1284 | 1373  | 1448 | 1614  | 1284  | 1313  | 1595  | 1604  | 1885  | 1482  | 1489  | 1539  | 1398  | 1185  | 1221  | 1562 | 1356  | 1680  | 1350  | 1484  | 1599  | 1675  | 1689  | 1670  | 1630  | 1389  | 1403  | Kctd1   |
| Kctd10  | 6827  | 7471 | 7182  | 6600 | 6221  | 6735  | 5424  | 6206  | 6648  | 6304  | 6525  | 7123  | 7350  | 6532  | 6347  | 7534  | 6996 | 6506  | 6464  | 5801  | 5624  | 6403  | 6599  | 6627  | 6836  | 7645  | 7180  | 7149  | Kctd10  |
| Kctd11  | 399   | 555  | 560   | 332  | 402   | 352   | 227   | 260   | 311   | 304   | 311   | 310   | 367   | 243   | 400   | 480   | 538  | 368   | 327   | 370   | 264   | 282   | 401   | 269   | 199   | 397   | 318   | 301   | Kctd11  |
| Kctd12  | 14723 | 8630 | 11352 | 9424 | 10166 | 10840 | 6681  | 14680 | 17666 | 16284 | 26934 | 11458 | 15580 | 12023 | 12389 | 15905 | 9678 | 12567 | 6950  | 6187  | 7570  | 20516 | 20316 | 15801 | 14697 | 11795 | 12996 | 11532 | Kctd12  |
| Kctd12b | 1202  | 726  | 1115  | 694  | 930   | 1011  | 812   | 1583  | 1573  | 1347  | 1589  | 1148  | 1528  | 1139  | 1042  | 967   | 867  | 810   | 813   | 1068  | 877   | 1365  | 1825  | 1127  | 1148  | 1153  | 1281  | 1248  | Kctd12b |
| Kctd13  | 845   | 1146 | 972   | 1535 | 1645  | 1225  | 1422  | 998   | 1023  | 1312  | 1021  | 1023  | 824   | 1074  | 893   | 879   | 1298 | 1556  | 1475  | 1247  | 1488  | 1253  | 968   | 1272  | 1214  | 1004  | 897   | 943   | Kctd13  |
| Kctd14  | 96    | 70   | 56    | 69   | 110   | 101   | 80    | 140   | 189   | 206   | 207   | 236   | 232   | 186   | 65    | 93    | 72   | 87    | 83    | 91    | 80    | 157   | 197   | 259   | 227   | 156   | 171   | 185   | Kctd14  |
| Kctd15  | 1693  | 1883 | 2366  | 2222 | 2888  | 2587  | 2252  | 4042  | 4436  | 5360  | 4730  | 5352  | 5037  | 4952  | 1569  | 1675  | 2497 | 2140  | 3184  | 2346  | 2236  | 4314  | 4210  | 5653  | 5509  | 5675  | 4993  | 4970  | Kctd15  |
| Kctd16  | 40    | 72   | 11    | 36   | 61    | 36    | 37    |       |       |       |       |       |       |       |       |       |      |       |       |       |       |       |       |       |       |       |       |       |         |

|          |       |       |       |       |       |       |       |       |       |       |       |       |       |       |       |       |       |       |       |       |       |       |       |       |       |       |       |       |          |       |
|----------|-------|-------|-------|-------|-------|-------|-------|-------|-------|-------|-------|-------|-------|-------|-------|-------|-------|-------|-------|-------|-------|-------|-------|-------|-------|-------|-------|-------|----------|-------|
| Kdm5a    | 16019 | 13455 | 10311 | 12463 | 10903 | 13027 | 12925 | 13877 | 11453 | 9875  | 10453 | 11318 | 11349 | 12100 | 16166 | 13448 | 10780 | 11681 | 10621 | 13501 | 12848 | 9894  | 10952 | 9575  | 10641 | 7652  | 12450 | 11055 | Kdm5a    |       |
| Kdm5b    | 19622 | 17694 | 19055 | 20826 | 23014 | 22710 | 22343 | 20263 | 19831 | 22233 | 20631 | 21758 | 21063 | 22362 | 19019 | 18510 | 21075 | 21798 | 23098 | 17801 | 22770 | 23758 | 19297 | 21630 | 23315 | 17789 | 20994 | 21967 | Kdm5b    |       |
| Kdm5c    | 8996  | 10028 | 7991  | 9060  | 9281  | 9356  | 8963  | 11696 | 12770 | 12618 | 12228 | 13414 | 13040 | 13071 | 10338 | 10304 | 10159 | 10557 | 11145 | 10576 | 11054 | 14875 | 15684 | 15947 | 17629 | 13313 | 18512 | 17267 | Kdm5c    |       |
| Kdm5d    | 5173  | 4934  | 3868  | 4318  | 4666  | 5139  | 4998  | 6592  | 7813  | 6821  | 5951  | 7517  | 7267  | 8003  | 5     | 0     | 0     | 1     | 1     | 7     | 0     | 0     | 14    | 0     | 0     | 1     | 0     | 0     | Kdm5d    |       |
| Kdm5e    | 5800  | 4769  | 4391  | 4950  | 5226  | 5920  | 5877  | 6008  | 5353  | 4905  | 4957  | 5538  | 6861  | 7298  | 6944  | 6858  | 7057  | 8199  | 8051  | 7414  | 7768  | 7155  | 7382  | 7105  | 8702  | 8267  | Kdm5e |       |          |       |
| Kdm6a    | 4713  | 6431  | 8816  | 8306  | 7873  | 6410  | 5896  | 6471  | 7460  | 10265 | 9575  | 11308 | 8408  | 9552  | 4117  | 5339  | 9320  | 7723  | 8667  | 4941  | 6687  | 10945 | 7064  | 11962 | 11119 | 11395 | 8894  | 9280  | Kdm6a    |       |
| Kdm7a    | 6192  | 4765  | 5093  | 5411  | 5921  | 6750  | 6382  | 7441  | 5777  | 6182  | 5984  | 6616  | 7050  | 7223  | 6435  | 5485  | 5911  | 5027  | 5940  | 6265  | 6288  | 6017  | 5908  | 5854  | 6891  | 5166  | 7222  | 7111  | Kdm7a    |       |
| Kdm8     | 171   | 183   | 256   | 122   | 133   | 180   | 130   | 529   | 600   | 518   | 499   | 701   | 713   | 732   | 129   | 144   | 229   | 133   | 168   | 182   | 174   | 556   | 557   | 593   | 579   | 729   | 732   | 732   | Kdm8     |       |
| Kdr      | 4358  | 4343  | 4963  | 4290  | 5186  | 4910  | 4203  | 4797  | 5177  | 6366  | 6711  | 6617  | 7448  | 6363  | 4349  | 4844  | 4393  | 4478  | 4422  | 4499  | 4429  | 6256  | 6187  | 6039  | 6302  | 5501  | 6689  | 6128  | Kdr      |       |
| Kdsr     | 2639  | 2211  | 2321  | 2986  | 2779  | 2918  | 2925  | 1807  | 1673  | 1773  | 2029  | 1727  | 1889  | 1788  | 2629  | 2555  | 2391  | 2863  | 2642  | 2756  | 2990  | 1917  | 1746  | 1768  | 1920  | 1578  | 1725  | 1870  | Kdsr     |       |
| Keap1    | 2225  | 2357  | 2576  | 2425  | 2416  | 2486  | 2428  | 2878  | 3541  | 3758  | 3838  | 3418  | 3256  | 3580  | 2014  | 2076  | 2566  | 2259  | 2588  | 2238  | 2446  | 3235  | 3489  | 3851  | 3734  | 3881  | 3395  | 3483  | Keap1    |       |
| Keg1     | 0     | 0     | 0     | 0     | 0     | 0     | 0     | 0     | 2     | 0     | 0     | 0     | 0     | 0     | 0     | 0     | 0     | 0     | 0     | 0     | 0     | 0     | 0     | 0     | 0     | 0     | 0     | 0     | Keg1     |       |
| Kel      | 325   | 478   | 365   | 194   | 78    | 167   | 156   | 319   | 328   | 258   | 131   | 622   | 1864  | 942   | 384   | 405   | 212   | 108   | 76    | 311   | 90    | 139   | 329   | 194   | 128   | 642   | 893   | 1860  | Kel      |       |
| Kera     | 68    | 14    | 29    | 10    | 4     | 42    | 9     | 106   | 244   | 67    | 161   | 37    | 59    | 23    | 38    | 53    | 10    | 56    | 38    | 9     | 4     | 90    | 326   | 55    | 23    | 49    | 51    | 31    | Kera     |       |
| Khdc1a   | 0     | 0     | 0     | 0     | 0     | 0     | 0     | 0     | 1     | 0     | 0     | 0     | 3     | 0     | 0     | 0     | 0     | 0     | 0     | 0     | 0     | 0     | 1     | 2     | 0     | 1     | 0     | 0     | Khdc1a   |       |
| Khdc1b   | 0     | 0     | 0     | 0     | 0     | 0     | 0     | 0     | 0     | 0     | 0     | 0     | 0     | 0     | 0     | 0     | 0     | 0     | 0     | 0     | 0     | 0     | 0     | 0     | 1     | 0     | 0     | 0     | Khdc1b   |       |
| Khdc1c   | 0     | 0     | 0     | 0     | 0     | 0     | 0     | 1     | 0     | 0     | 1     | 0     | 0     | 0     | 1     | 0     | 0     | 0     | 0     | 0     | 0     | 0     | 0     | 2     | 0     | 2     | 0     | 0     | Khdc1c   |       |
| Khdc3    | 0     | 1     | 0     | 0     | 1     | 0     | 2     | 5     | 0     | 3     | 2     | 0     | 1     | 2     | 5     | 0     | 6     | 0     | 0     | 3     | 1     | 2     | 3     | 2     | 2     | 0     | 2     | 0     | 1        | Khdc3 |
| Khdc4    | 8824  | 7960  | 8289  | 8828  | 8588  | 8635  | 9170  | 11876 | 9981  | 10325 | 10124 | 11239 | 10768 | 8814  | 7754  | 8041  | 8298  | 8890  | 8743  | 9053  | 11000 | 9916  | 10621 | 10984 | 11204 | 10727 | 11450 | Khdc4 |          |       |
| Khdrbs1  | 37957 | 30469 | 42308 | 38649 | 38494 | 38528 | 43590 | 34878 | 31411 | 34933 | 35696 | 43814 | 40216 | 47861 | 36979 | 32009 | 40132 | 37527 | 38877 | 35515 | 42568 | 36469 | 30277 | 40027 | 40988 | 47552 | 41976 | 47876 | Khdrbs1  |       |
| Khdrbs2  | 788   | 809   | 975   | 1213  | 1494  | 1274  | 1433  | 1501  | 1341  | 1292  | 1188  | 1185  | 1047  | 1280  | 994   | 814   | 998   | 1118  | 1320  | 1512  | 1415  | 1547  | 1346  | 1323  | 1472  | 1078  | 1178  | 1183  | Khdrbs2  |       |
| Khdrbs3  | 6908  | 6796  | 7685  | 8402  | 8516  | 7435  | 10391 | 6897  | 6125  | 7363  | 5617  | 7153  | 5200  | 7903  | 7564  | 5907  | 8438  | 8045  | 9230  | 8555  | 9683  | 6904  | 5699  | 7421  | 7893  | 8086  | 6529  | 7522  | Khdrbs3  |       |
| Khkh     | 352   | 419   | 448   | 350   | 313   | 306   | 254   | 199   | 286   | 282   | 357   | 229   | 235   | 186   | 318   | 379   | 357   | 336   | 320   | 365   | 239   | 227   | 336   | 269   | 206   | 267   | 277   | 192   | Khkh     |       |
| Khnyrn   | 5144  | 5482  | 6990  | 6098  | 5174  | 4963  | 4713  | 3401  | 3568  | 4329  | 4619  | 4488  | 4630  | 4162  | 4636  | 6017  | 6507  | 5692  | 5566  | 4209  | 4887  | 3843  | 3862  | 4240  | 3606  | 4481  | 4391  | 4300  | Khnyrn   |       |
| Khsrp    | 7741  | 9164  | 13467 | 11939 | 10433 | 8722  | 9317  | 9788  | 11688 | 14021 | 13401 | 17024 | 13632 | 15671 | 7201  | 8541  | 13385 | 10853 | 11536 | 7789  | 9322  | 12318 | 10777 | 16944 | 14310 | 20067 | 14573 | 16117 | Khsrp    |       |
| Kidsn220 | 30613 | 32669 | 22969 | 35000 | 45382 | 43320 | 42972 | 42393 | 40153 | 40967 | 35692 | 33052 | 31905 | 33476 | 34585 | 29354 | 28912 | 38919 | 39537 | 42573 | 45271 | 45101 | 37475 | 31971 | 45096 | 17854 | 31052 | 27855 | Kidsn220 |       |
| Kif11    | 927   | 755   | 390   | 458   | 277   | 337   | 923   | 1192  | 637   | 399   | 767   | 697   | 1084  | 508   | 767   | 558   | 1929  | 478   | 458   | 502   | 307   | 488   | 365   | 437   | 561   | 694   | 648   | 998   | Kif11    |       |
| Kif12    | 1     | 2     | 0     | 7     | 0     | 2     | 0     | 0     | 1     | 1     | 3     | 1     | 1     | 0     | 0     | 3     | 0     | 7     | 0     | 0     | 4     | 3     | 4     | 1     | 5     | 5     | 0     | 0     | Kif12    |       |
| Kif13a   | 2679  | 2697  | 2593  | 2487  | 2917  | 2927  | 2189  | 4482  | 5001  | 5119  | 5518  | 5710  | 5697  | 5259  | 2591  | 2779  | 2484  | 2426  | 2498  | 2252  | 2364  | 5040  | 5103  | 4913  | 4847  | 4041  | 5765  | 5451  | Kif13a   |       |
| Kif13b   | 3741  | 3788  | 2716  | 4083  | 4463  | 4345  | 4114  | 2873  | 2359  | 3157  | 3353  | 2864  | 2971  | 2732  | 3756  | 4115  | 3473  | 4624  | 4197  | 3719  | 4189  | 3076  | 2992  | 2698  | 3295  | 1654  | 2705  | 2575  | Kif13b   |       |
| Kif14    | 2453  | 1928  | 1752  | 1632  | 1254  | 1528  | 1667  | 2251  | 3231  | 2344  | 2071  | 3018  | 2578  | 3182  | 1919  | 1885  | 1591  | 1448  | 1541  | 1419  | 1490  | 1601  | 1920  | 2486  | 2249  | 2244  | 3232  | 2961  | Kif14    |       |
| Kif15    | 9439  | 7449  | 7457  | 5945  | 4345  | 4189  | 6554  | 7952  | 7143  | 5970  | 5486  | 9977  | 8255  | 9777  | 8294  | 7789  | 6468  | 4925  | 5587  | 7081  | 5679  | 4767  | 5950  | 7279  | 6769  | 9773  | 10689 | 9882  | Kif15    |       |
| Kif16b   | 1703  | 1412  | 1418  | 1119  | 975   | 6187  | 1076  | 1545  | 1669  | 1494  | 1702  | 1427  | 1678  | 1563  | 1515  | 1727  | 1243  | 1137  | 950   | 1116  | 945   | 1464  | 1789  | 1364  | 1309  | 1413  | 1618  | 1650  | Kif16b   |       |
| Kif17    | 473   | 583   | 484   | 811   | 797   | 656   | 565   | 134   | 179   | 188   | 160   | 90    | 170   | 123   | 522   | 632   | 649   | 769   | 708   | 587   | 617   | 226   | 166   | 134   | 132   | 88    | 102   | 85    | Kif17    |       |
| Kif18a   | 3592  | 2932  | 2797  | 2526  | 1939  | 2220  | 2699  | 3132  | 2548  | 1956  | 1977  | 3388  | 2866  | 3572  | 3349  | 3135  | 2522  | 2214  | 2383  | 3134  | 2507  | 1983  | 2291  | 2668  | 2231  | 3725  | 3843  | 3628  | Kif18a   |       |
| Kif18b   | 2684  | 3143  | 3441  | 2802  | 1886  | 2175  | 2202  | 2004  | 2310  | 2152  | 1898  | 3151  | 2535  | 2931  | 2281  | 2629  | 3275  | 2422  | 2580  | 2225  | 2070  | 1462  | 1929  | 2742  | 2317  | 3874  | 2952  | 3010  | Kif18b   |       |
| Kif19a   | 571   | 566   | 420   | 450   | 429   | 212   | 174   | 365   | 434   | 567   | 412   | 71    | 403   | 95    | 613   | 808   | 474   | 371   | 252   | 180   | 200   | 276   | 373   | 420   | 220   | 644   | 81    | 80    | Kif19a   |       |
| Kif19b   | 59    | 93    | 75    | 105   | 83    | 80    | 77    | 11    | 16    | 5     | 10    | 11    | 22    | 20    | 59    | 93    | 78    | 106   | 73    | 59    | 83    | 23    | 25    | 10    | 21    | 17    | 16    | 8     | Kif19b   |       |
| Kif1a    | 23218 | 29704 | 25209 | 39441 | 47284 | 40813 | 39267 | 24504 | 29245 | 33622 | 27065 | 28874 | 26409 | 27037 | 25477 | 25996 | 33943 | 41247 | 45796 | 34951 | 43328 | 38345 | 24629 | 29977 | 39367 | 15424 | 23301 | 24417 | Kif1a    |       |
| Kif1b    | 46036 | 46497 | 30166 | 48993 | 59828 | 57330 | 57203 | 54063 | 48029 | 51445 | 45728 | 48137 | 46233 | 49520 | 50858 | 43354 | 39468 | 51103 | 51152 | 55591 | 60969 | 52647 | 44839 | 39259 | 58317 | 26996 | 50138 | 44362 | Kif1b    |       |
| Kif1c    | 7542  | 8920  | 10431 | 8659  | 7086  | 7242  | 5989  | 3991  | 5456  | 5471  | 6363  | 6024  | 6348  | 5446  | 6858  | 9668  | 9244  | 8262  | 7492  | 6100  | 6280  | 4542  | 5847  | 6365  | 5430  | 6650  | 5788  | 5860  | Kif1c    |       |
| Kif20a   | 7055  | 6217  | 6291  | 4149  | 3323  | 4094  | 4014  | 7216  | 6803  | 5609  | 5465  | 8399  | 7541  | 8483  | 5765  | 5643  | 5247  | 3504  | 4344  | 4985  | 3810  | 4408  | 6227  | 7196  | 5565  | 10247 | 8793  | 8539  | Kif20a   |       |
| Kif20b   | 6304  | 4983  | 5409  | 4444  | 3412  | 4237  | 4842  | 5697  | 4492  | 3694  | 3837  | 5802  | 5011  | 6079  | 6050  | 5828  | 4727  | 4006  | 4112  | 5542  | 4488  | 3275  | 4146  | 4593  | 4039  | 4998  | 6064  | 5734  | Kif20b   |       |
| Kif21a   | 15648 | 16916 | 16488 | 17905 | 18359 | 18525 | 18565 | 19844 | 15781 | 17726 | 14716 | 20992 | 18046 | 21020 | 17977 | 14422 | 17321 | 16657 | 18672 | 19225 | 18788 | 18586 | 14947 | 18346 | 21016 | 13943 | 22167 | 20704 | Kif21a   |       |
| Kif21b   | 16308 | 21208 | 18470 | 33062 | 39739 | 33393 | 34820 | 22379 | 27656 | 37205 | 28533 | 32246 | 23362 | 30372 | 16635 | 18364 | 27692 | 35249 | 39675 | 26833 | 37957 | 37552 | 22227 | 34550 | 44888 | 14852 | 22779 | 24961 | Kif21b   |       |
| Kif22    | 6749  | 6678  | 7130  | 5260  | 3671  | 4634  | 4807  | 4899  | 4889  | 4309  | 3948  | 6958  | 5417  | 6790  | 5796  | 5535  | 6047  | 4559  | 5256  | 5402  | 4486  | 3352  | 4031  | 5663  | 4963  | 8750  | 6958  | 6842  | Kif22    |       |
| Kif23    | 7922  | 7284  | 7168  | 6484  | 5035  | 6047  | 6873  | 6453  | 6083  | 5659  | 5464  | 8407  | 7438  | 8986  | 7249  | 6816  | 6339  | 6012  | 5786  | 6542  | 6395  | 4355  | 5339  | 6636  | 6121  | 7894  | 9001  | 8432  | Kif23    |       |
| Kif24    | 3601  | 3575  | 2251  | 2045  | 1777  | 2472  | 2481  | 14    |       |       |       |       |       |       |       |       |       |       |       |       |       |       |       |       |       |       |       |       |          |       |

|         |       |       |       |       |       |       |       |       |       |       |       |       |       |       |       |       |       |       |       |       |       |       |       |       |       |       |       |       |         |       |
|---------|-------|-------|-------|-------|-------|-------|-------|-------|-------|-------|-------|-------|-------|-------|-------|-------|-------|-------|-------|-------|-------|-------|-------|-------|-------|-------|-------|-------|---------|-------|
| Kiz     | 2268  | 2051  | 1997  | 1665  | 1657  | 1603  | 1937  | 1844  | 1633  | 1498  | 1343  | 1617  | 1488  | 1606  | 2248  | 1805  | 1878  | 1552  | 1548  | 1953  | 1661  | 1509  | 1658  | 1423  | 1492  | 1641  | 1710  | 1803  | Kiz     |       |
| Kl      | 21    | 35    | 38    | 52    | 52    | 49    | 41    | 62    | 54    | 80    | 82    | 89    | 99    | 63    | 18    | 33    | 36    | 26    | 41    | 50    | 68    | 87    | 69    | 78    | 107   | 47    | 71    | 74    | Kl      |       |
| Klb     | 14    | 19    | 39    | 26    | 13    | 18    | 20    | 9     | 12    | 10    | 9     | 9     | 10    | 14    | 8     | 26    | 14    | 28    | 16    | 29    | 24    | 17    | 6     | 6     | 17    | 10    | 23    | 15    | Klb     |       |
| Klc1    | 20172 | 26531 | 25183 | 30702 | 31397 | 27677 | 27450 | 23007 | 22251 | 27099 | 22769 | 25350 | 24145 | 24834 | 23179 | 22119 | 29488 | 29729 | 31977 | 28059 | 29756 | 26963 | 21462 | 25355 | 28246 | 19633 | 24535 | 24309 | Klc1    |       |
| Klc2    | 3838  | 5200  | 5639  | 6240  | 5960  | 5457  | 4965  | 4658  | 5007  | 5860  | 5156  | 5423  | 5383  | 4979  | 4163  | 4476  | 6095  | 5601  | 6448  | 5326  | 5168  | 5930  | 4757  | 5297  | 5942  | 5453  | 5289  | 4926  | Klc2    |       |
| Klc3    | 281   | 237   | 286   | 199   | 188   | 126   | 95    | 122   | 166   | 215   | 158   | 78    | 132   | 70    | 225   | 249   | 158   | 144   | 153   | 130   | 97    | 67    | 213   | 217   | 32    | 263   | 72    | 69    | Klc3    |       |
| Klc4    | 3129  | 4428  | 4334  | 4848  | 4148  | 3994  | 3864  | 2630  | 2898  | 3184  | 2929  | 3358  | 3095  | 3318  | 3386  | 3514  | 4663  | 4478  | 4789  | 4008  | 4025  | 3003  | 2790  | 3521  | 3616  | 3177  | 3280  | 3262  | Klc4    |       |
| Klf1    | 53    | 82    | 67    | 44    | 31    | 44    | 30    | 26    | 35    | 51    | 61    | 58    | 93    | 60    | 61    | 77    | 74    | 45    | 65    | 48    | 33    | 20    | 38    | 39    | 22    | 78    | 62    | 128   | Klf1    |       |
| Klf10   | 1667  | 1661  | 1785  | 1588  | 1470  | 1497  | 1402  | 1566  | 1566  | 1575  | 1559  | 1350  | 1484  | 1426  | 1584  | 1729  | 1586  | 1669  | 1438  | 1433  | 1410  | 1491  | 1805  | 1480  | 1342  | 1688  | 1484  | 1508  | Klf10   |       |
| Klf11   | 1083  | 922   | 1150  | 1119  | 1163  | 1141  | 1045  | 1642  | 1874  | 1738  | 1687  | 1897  | 1861  | 1662  | 969   | 1014  | 1095  | 1174  | 1079  | 1086  | 998   | 1848  | 1818  | 1763  | 1843  | 1717  | 1743  | 1684  | Klf11   |       |
| Klf12   | 3682  | 3399  | 1284  | 3041  | 3781  | 4811  | 4051  | 6191  | 6012  | 4793  | 5807  | 5301  | 4883  | 5770  | 3649  | 3122  | 1845  | 3002  | 3129  | 4067  | 4571  | 4445  | 5535  | 3373  | 6211  | 1498  | 5733  | 4321  | Klf12   |       |
| Klf13   | 3598  | 4222  | 7039  | 6021  | 5799  | 4834  | 4852  | 3522  | 3794  | 4917  | 4674  | 5383  | 5302  | 5513  | 3497  | 4150  | 6431  | 5621  | 6241  | 4094  | 5149  | 4525  | 3508  | 5652  | 5579  | 5932  | 5039  | 5622  | Klf13   |       |
| Klf14   | 42    | 38    | 53    | 37    | 49    | 43    | 20    | 29    | 79    | 37    | 315   | 29    | 18    | 23    | 40    | 51    | 31    | 45    | 30    | 36    | 25    | 62    | 173   | 30    | 26    | 37    | 45    | 24    | Klf14   |       |
| Klf15   | 471   | 566   | 426   | 622   | 557   | 508   | 467   | 261   | 324   | 322   | 289   | 178   | 245   | 187   | 434   | 477   | 417   | 588   | 507   | 551   | 524   | 296   | 300   | 283   | 346   | 156   | 184   | 161   | Klf15   |       |
| Klf16   | 1691  | 1981  | 2064  | 2428  | 1818  | 1704  | 1630  | 783   | 924   | 961   | 1044  | 1033  | 911   | 1000  | 1439  | 1812  | 2085  | 2254  | 1943  | 1499  | 1742  | 866   | 892   | 1114  | 1081  | 1396  | 884   | 926   | Klf16   |       |
| Klf17   | 0     | 1     | 0     | 3     | 0     | 0     | 1     | 0     | 2     | 0     | 0     | 0     | 0     | 0     | 0     | 0     | 0     | 2     | 0     | 2     | 0     | 1     | 2     | 1     | 1     | 0     | 1     | 0     | 1       | Klf17 |
| Klf2    | 218   | 272   | 248   | 373   | 201   | 234   | 166   | 245   | 293   | 300   | 372   | 360   | 259   | 301   | 248   | 306   | 257   | 358   | 190   | 124   | 151   | 333   | 339   | 346   | 380   | 332   | 267   | 311   | Klf2    |       |
| Klf3    | 3007  | 2421  | 3285  | 2804  | 3003  | 3113  | 2841  | 3751  | 4057  | 4166  | 4929  | 4447  | 5319  | 4338  | 2888  | 3030  | 2992  | 3081  | 3019  | 2520  | 2878  | 3776  | 4301  | 4361  | 4126  | 4384  | 4250  | 4593  | Klf3    |       |
| Klf4    | 893   | 791   | 792   | 818   | 458   | 800   | 367   | 877   | 1351  | 1290  | 1584  | 784   | 1071  | 707   | 746   | 923   | 750   | 976   | 475   | 419   | 395   | 1074  | 1610  | 1114  | 1052  | 1063  | 795   | 718   | Klf4    |       |
| Klf5    | 475   | 344   | 548   | 499   | 381   | 398   | 359   | 369   | 540   | 396   | 576   | 232   | 238   | 212   | 335   | 407   | 428   | 568   | 408   | 302   | 375   | 317   | 681   | 385   | 230   | 287   | 245   | 201   | Klf5    |       |
| Klf6    | 5133  | 4933  | 5734  | 5248  | 4570  | 5150  | 4661  | 4951  | 4665  | 4525  | 5565  | 5229  | 6131  | 5417  | 5657  | 5852  | 4908  | 5681  | 4299  | 4610  | 4186  | 5467  | 5436  | 4938  | 4952  | 4735  | 5389  | 5510  | Klf6    |       |
| Klf7    | 5013  | 4761  | 4797  | 6595  | 7967  | 6628  | 7423  | 8096  | 7792  | 8311  | 7810  | 7417  | 7172  | 7878  | 5780  | 4408  | 5788  | 6549  | 6783  | 6674  | 6997  | 10696 | 7009  | 7903  | 9515  | 5507  | 6793  | 7037  | Klf7    |       |
| Klf8    | 1574  | 1211  | 1138  | 1325  | 1637  | 1637  | 1573  | 1425  | 1463  | 1362  | 1151  | 1200  | 1082  | 1299  | 1596  | 1328  | 1249  | 1473  | 1410  | 1632  | 1591  | 1604  | 1331  | 1118  | 1400  | 807   | 1288  | 1252  | Klf8    |       |
| Klf9    | 1376  | 1302  | 1387  | 1537  | 1004  | 1147  | 1181  | 335   | 401   | 355   | 347   | 238   | 254   | 215   | 1278  | 1392  | 1262  | 1457  | 1026  | 980   | 1168  | 322   | 442   | 305   | 272   | 303   | 272   | 236   | Klf9    |       |
| Klhdc1  | 181   | 139   | 134   | 241   | 319   | 285   | 292   | 366   | 445   | 351   | 348   | 273   | 243   | 318   | 222   | 168   | 165   | 215   | 263   | 284   | 307   | 403   | 444   | 378   | 355   | 256   | 261   | 262   | Klhdc1  |       |
| Klhdc10 | 19738 | 17062 | 17766 | 21839 | 24004 | 24258 | 23643 | 15687 | 15010 | 17158 | 19299 | 17373 | 14907 | 16820 | 18858 | 16678 | 19870 | 22518 | 23332 | 19142 | 24497 | 20229 | 15213 | 16114 | 19228 | 13527 | 16727 | 15702 | Klhdc10 |       |
| Klhdc2  | 10501 | 9599  | 10771 | 10951 | 12390 | 11962 | 11854 | 16967 | 13648 | 14018 | 12954 | 14963 | 14519 | 15580 | 11540 | 9442  | 10874 | 10638 | 12494 | 13519 | 12243 | 15421 | 13619 | 14996 | 16546 | 14895 | 15739 | 16008 | Klhdc2  |       |
| Klhdc3  | 8063  | 9562  | 9589  | 10564 | 9861  | 9667  | 9081  | 6359  | 7246  | 7458  | 7587  | 7716  | 7270  | 7337  | 7615  | 8294  | 9781  | 10210 | 10816 | 8314  | 9748  | 7454  | 7150  | 7996  | 8181  | 8321  | 6952  | 7151  | Klhdc3  |       |
| Klhdc4  | 2886  | 3664  | 4355  | 3940  | 3673  | 3369  | 3334  | 2352  | 2717  | 3177  | 2988  | 3681  | 3185  | 3343  | 3082  | 3248  | 4298  | 3650  | 4016  | 2937  | 3555  | 2637  | 2584  | 3310  | 3351  | 4139  | 3439  | 3674  | Klhdc4  |       |
| Klhdc7a | 58    | 41    | 53    | 26    | 99    | 45    | 57    | 200   | 261   | 317   | 217   | 307   | 266   | 213   | 44    | 40    | 60    | 42    | 84    | 84    | 70    | 266   | 446   | 219   | 240   | 187   | 242   | 197   | Klhdc7a |       |
| Klhdc7b | 0     | 0     | 4     | 1     | 2     | 2     | 0     | 0     | 0     | 0     | 5     | 1     | 5     | 0     | 0     | 1     | 3     | 2     | 7     | 1     | 2     | 2     | 1     | 0     | 9     | 2     | 1     | 2     | Klhdc7b |       |
| Klhdc8a | 307   | 364   | 575   | 459   | 525   | 435   | 463   | 580   | 500   | 625   | 445   | 466   | 606   | 477   | 360   | 324   | 548   | 383   | 574   | 440   | 465   | 714   | 417   | 431   | 599   | 363   | 655   | 600   | Klhdc8a |       |
| Klhdc8b | 3125  | 3821  | 3836  | 3944  | 4033  | 3893  | 3401  | 2567  | 2892  | 2588  | 2834  | 3511  | 2947  | 2886  | 2955  | 3302  | 4325  | 4034  | 4282  | 3876  | 3632  | 3237  | 3020  | 3263  | 3312  | 3554  | 3246  | 3030  | Klhdc8b |       |
| Klhdc9  | 116   | 117   | 153   | 119   | 131   | 147   | 123   | 57    | 130   | 136   | 61    | 151   | 104   | 123   | 117   | 83    | 147   | 145   | 136   | 185   | 127   | 85    | 113   | 88    | 101   | 124   | 98    | 100   | Klhdc9  |       |
| Klh11   | 271   | 340   | 511   | 445   | 700   | 497   | 494   | 850   | 713   | 713   | 582   | 560   | 637   | 547   | 423   | 321   | 385   | 502   | 559   | 735   | 577   | 1066  | 717   | 553   | 781   | 206   | 693   | 637   | Klh11   |       |
| Klh10   | 37    | 27    | 35    | 48    | 42    | 23    | 26    | 64    | 70    | 90    | 85    | 55    | 65    | 61    | 24    | 38    | 30    | 34    | 30    | 33    | 28    | 62    | 70    | 54    | 41    | 63    | 78    | 62    | Klh10   |       |
| Klh11   | 2068  | 2232  | 482   | 1551  | 1511  | 1955  | 1635  | 2074  | 1844  | 1376  | 1395  | 1481  | 1267  | 1432  | 1900  | 1845  | 913   | 1473  | 1283  | 2002  | 1780  | 1105  | 1707  | 1035  | 1441  | 200   | 1577  | 1176  | Klh11   |       |
| Klh12   | 4587  | 4103  | 4231  | 4270  | 4139  | 4286  | 4330  | 3690  | 3522  | 3622  | 3617  | 3809  | 3841  | 3976  | 4498  | 4172  | 4194  | 4402  | 4087  | 3973  | 4254  | 3798  | 3432  | 3771  | 3960  | 3718  | 3624  | 3915  | Klh12   |       |
| Klh13   | 7751  | 6761  | 6955  | 6211  | 7419  | 7161  | 8210  | 12611 | 9313  | 8826  | 9751  | 9606  | 8828  | 10355 | 8550  | 6218  | 6672  | 6333  | 7455  | 8432  | 7879  | 11976 | 10223 | 9711  | 9725  | 8769  | 10717 | 10631 | Klh13   |       |
| Klh14   | 189   | 170   | 344   | 201   | 476   | 180   | 168   | 266   | 267   | 399   | 364   | 220   | 348   | 147   | 273   | 248   | 308   | 193   | 272   | 197   | 217   | 309   | 250   | 203   | 214   | 164   | 221   | 184   | Klh14   |       |
| Klh15   | 1895  | 1367  | 1968  | 2361  | 1920  | 1940  | 2062  | 1401  | 1048  | 1081  | 1229  | 1348  | 1213  | 1321  | 1886  | 1720  | 2070  | 2102  | 1816  | 1640  | 1941  | 1399  | 1082  | 1174  | 1200  | 1258  | 1403  | 1538  | Klh15   |       |
| Klh18   | 1615  | 1868  | 1785  | 1900  | 2522  | 2281  | 2042  | 1928  | 2162  | 2597  | 2422  | 2184  | 2161  | 2081  | 1647  | 1854  | 1943  | 2283  | 2242  | 1895  | 2134  | 2765  | 2245  | 2069  | 2581  | 1836  | 2020  | 2035  | Klh18   |       |
| Klh21   | 3031  | 3076  | 3387  | 3858  | 4364  | 4094  | 4320  | 3348  | 2984  | 3191  | 2986  | 3163  | 2565  | 3195  | 3268  | 2746  | 3748  | 3858  | 4146  | 4273  | 4387  | 3695  | 2969  | 3319  | 3637  | 3243  | 2901  | 2967  | Klh21   |       |
| Klh20   | 2955  | 2601  | 2560  | 2666  | 2767  | 2702  | 2825  | 2977  | 2876  | 2730  | 2971  | 3095  | 2905  | 3073  | 2779  | 2555  | 2700  | 2779  | 2558  | 2620  | 2807  | 3023  | 2739  | 2848  | 3023  | 2681  | 3133  | 3019  | Klh20   |       |
| Klh21   | 1269  | 1697  | 1853  | 1531  | 1087  | 1162  | 911   | 480   | 597   | 599   | 979   | 600   | 747   | 511   | 1130  | 1710  | 1461  | 1644  | 1212  | 988   | 1034  | 555   | 776   | 668   | 511   | 829   | 751   | 532   | Klh21   |       |
| Klh22   | 4932  | 5053  | 4529  | 4747  | 4703  | 5006  | 4853  | 5256  | 5787  | 5163  | 5927  | 4604  | 4835  | 4625  | 4898  | 5045  | 4493  | 4626  | 4918  | 4799  | 4889  | 4769  | 5827  | 5108  | 5231  | 4640  | 4871  | 4899  | Klh22   |       |
| Klh23   | 3924  | 3107  | 3389  | 3496  | 5518  | 4883  | 5377  | 8462  | 7225  | 7615  | 7012  | 7140  | 6290  | 7647  | 4094  | 3284  | 3552  | 4056  | 4711  | 4938  | 5012  | 9307  | 7451  | 7162  | 8278  | 6638  | 6957  | 7355  | Klh23   |       |
| Klh24   | 8992  | 7710  | 5852  | 8281  | 9524  | 9536  | 9833  | 18997 | 14455 | 13805 | 13144 | 13891 | 13053 | 15032 | 9570  | 7657  | 7176  | 8319  | 9149  | 10057 | 9991  | 14953 | 14408 | 12720 | 15632 | 9594  | 14141 |       |         |       |







|            |       |       |       |       |       |       |       |       |       |       |       |       |       |       |       |       |       |       |       |       |       |       |       |       |       |       |       |       |            |
|------------|-------|-------|-------|-------|-------|-------|-------|-------|-------|-------|-------|-------|-------|-------|-------|-------|-------|-------|-------|-------|-------|-------|-------|-------|-------|-------|-------|-------|------------|
| Lama3      | 188   | 160   | 73    | 125   | 176   | 204   | 98    | 537   | 856   | 469   | 552   | 223   | 418   | 204   | 204   | 223   | 109   | 186   | 122   | 112   | 116   | 262   | 907   | 291   | 274   | 104   | 221   | 182   | Lama3      |
| Lama4      | 4577  | 4042  | 3463  | 3730  | 4178  | 4118  | 2834  | 4949  | 6512  | 6103  | 8404  | 4376  | 5641  | 4114  | 3972  | 5091  | 3393  | 4901  | 3102  | 2920  | 3397  | 5905  | 7879  | 5487  | 5208  | 4378  | 4408  | 3693  | Lama4      |
| Lama5      | 5609  | 5458  | 5994  | 5168  | 4159  | 4438  | 3728  | 1870  | 3194  | 2014  | 2127  | 1900  | 1971  | 1374  | 3883  | 6292  | 5284  | 5217  | 4795  | 3672  | 3620  | 1103  | 3118  | 2335  | 1163  | 1493  | 1367  | 1435  | Lama5      |
| Lamb1      | 9009  | 8455  | 8209  | 6103  | 6411  | 6870  | 4616  | 8294  | 11142 | 10341 | 14780 | 8768  | 10754 | 8104  | 7570  | 10875 | 6219  | 8152  | 5408  | 5305  | 5219  | 8883  | 13762 | 9962  | 8739  | 9602  | 8814  | 8064  | Lamb1      |
| Lamb2      | 6574  | 8221  | 8086  | 7162  | 5616  | 6661  | 4545  | 4268  | 6203  | 6011  | 6924  | 6810  | 6648  | 5329  | 5788  | 7868  | 7722  | 7130  | 6351  | 5049  | 4867  | 5723  | 6492  | 6317  | 5490  | 6598  | 6694  | 5737  | Lamb2      |
| Lamb3      | 61    | 31    | 9     | 24    | 26    | 43    | 30    | 95    | 212   | 103   | 94    | 60    | 37    | 49    | 22    | 42    | 30    | 31    | 15    | 17    | 21    | 52    | 178   | 75    | 50    | 56    | 43    | 55    | Lamb3      |
| Lamc1      | 15177 | 15784 | 13148 | 13115 | 12612 | 13392 | 10321 | 7847  | 10708 | 10766 | 13522 | 10025 | 12242 | 9805  | 13175 | 18210 | 12245 | 15152 | 11120 | 9883  | 11304 | 9618  | 11768 | 10110 | 9657  | 7885  | 10206 | 9252  | Lamc1      |
| Lamc2      | 509   | 209   | 109   | 86    | 141   | 167   | 48    | 421   | 677   | 378   | 430   | 100   | 177   | 95    | 154   | 306   | 57    | 173   | 79    | 77    | 59    | 167   | 623   | 221   | 128   | 179   | 94    | 96    | Lamc2      |
| Lamc3      | 1410  | 2087  | 2692  | 1633  | 1664  | 1684  | 1268  | 916   | 946   | 1359  | 1153  | 2184  | 2465  | 1788  | 1444  | 2147  | 2101  | 1571  | 1583  | 1539  | 1464  | 1465  | 1288  | 1334  | 1476  | 1696  | 2617  | 1968  | Lamc3      |
| Lamp1      | 14645 | 15964 | 15273 | 13955 | 13270 | 13868 | 12398 | 13213 | 14032 | 13322 | 13570 | 12686 | 13782 | 12309 | 15217 | 16240 | 14326 | 14198 | 13061 | 12718 | 12948 | 13356 | 15655 | 12469 | 12174 | 13705 | 12511 | 13099 | Lamp1      |
| Lamp2      | 15628 | 11693 | 12346 | 10883 | 9667  | 10570 | 10017 | 10461 | 10165 | 7912  | 10234 | 8232  | 9162  | 8113  | 15136 | 14952 | 10720 | 10962 | 9294  | 11530 | 9377  | 8915  | 11908 | 7911  | 7147  | 8285  | 8451  | 8274  | Lamp2      |
| Lamp3      | 21    | 16    | 32    | 12    | 11    | 9     | 13    | 16    | 12    | 10    | 15    | 22    | 12    | 22    | 12    | 9     | 25    | 21    | 7     | 16    | 14    | 12    | 13    | 24    | 8     | 10    | 16    | 12    | Lamp3      |
| Lamp5      | 61    | 123   | 62    | 79    | 939   | 211   | 68    | 1570  | 1653  | 1816  | 2203  | 202   | 1750  | 140   | 347   | 213   | 129   | 114   | 76    | 98    | 57    | 1684  | 1913  | 149   | 271   | 128   | 194   | 172   | Lamp5      |
| Lamtor1    | 1623  | 1660  | 1369  | 1237  | 1322  | 1454  | 1403  | 3160  | 3454  | 3013  | 2826  | 3186  | 3030  | 3423  | 1524  | 1554  | 1280  | 1268  | 1425  | 1430  | 1367  | 2690  | 3416  | 3152  | 2930  | 3662  | 3340  | 3376  | Lamtor1    |
| Lamtor2    | 3751  | 4905  | 6354  | 6308  | 4898  | 4838  | 4495  | 2622  | 2952  | 3527  | 3332  | 3704  | 3839  | 3437  | 4120  | 4483  | 6071  | 5490  | 5715  | 5928  | 4245  | 2391  | 3036  | 3771  | 3819  | 4622  | 4314  | 3779  | Lamtor2    |
| Lamtor3    | 3752  | 3913  | 3764  | 4007  | 3435  | 3570  | 4193  | 2967  | 2726  | 2856  | 2608  | 2836  | 2759  | 3125  | 3767  | 3573  | 3722  | 3695  | 3722  | 4274  | 4073  | 2650  | 2807  | 2862  | 2934  | 3210  | 2815  | 3169  | Lamtor3    |
| Lamtor3-ps | 45    | 12    | 34    | 16    | 65    | 45    | 19    | 140   | 132   | 154   | 130   | 113   | 116   | 126   | 24    | 27    | 21    | 12    | 54    | 53    | 29    | 159   | 137   | 147   | 144   | 151   | 156   | 112   | Lamtor3-ps |
| Lamtor4    | 1010  | 1370  | 1282  | 1361  | 1332  | 1284  | 1205  | 1435  | 1461  | 1584  | 1545  | 1417  | 1456  | 1420  | 1167  | 1048  | 1469  | 1318  | 1303  | 1479  | 1353  | 1211  | 1496  | 1683  | 1625  | 1391  | 1449  | 1499  | Lamtor4    |
| Lamtor5    | 2692  | 2587  | 2951  | 2701  | 2520  | 2525  | 3009  | 2403  | 2258  | 2339  | 2373  | 2407  | 2388  | 2621  | 2846  | 2470  | 2775  | 2634  | 2729  | 3261  | 2719  | 2052  | 2269  | 2611  | 2439  | 2883  | 2422  | 2651  | Lamtor5    |
| Lanc1      | 5252  | 5884  | 4031  | 4987  | 5174  | 5156  | 5223  | 4820  | 2468  | 4120  | 4062  | 3917  | 3758  | 5903  | 5557  | 5224  | 4612  | 5152  | 4993  | 5489  | 5719  | 4518  | 4847  | 3875  | 4359  | 3704  | 3903  | 3858  | Lanc1      |
| Lanc2      | 2417  | 2160  | 2281  | 2249  | 2894  | 2799  | 2758  | 6883  | 5867  | 6604  | 5680  | 6652  | 5991  | 6842  | 2622  | 1912  | 2351  | 2234  | 2780  | 2888  | 2703  | 7691  | 5749  | 6388  | 7095  | 6658  | 6577  | 7031  | Lanc2      |
| Lanc3      | 364   | 296   | 176   | 381   | 619   | 658   | 625   | 573   | 477   | 572   | 446   | 463   | 480   | 423   | 340   | 250   | 302   | 464   | 556   | 516   | 536   | 449   | 334   | 378   | 607   | 99    | 463   | 310   | Lanc3      |
| Lao1       | 0     | 0     | 0     | 0     | 0     | 0     | 0     | 0     | 0     | 0     | 0     | 0     | 0     | 0     | 0     | 0     | 0     | 0     | 0     | 0     | 0     | 0     | 1     | 0     | 0     | 0     | 0     | 0     | Lao1       |
| Lap3       | 4169  | 4475  | 4856  | 3688  | 3170  | 3586  | 3675  | 2959  | 3160  | 2811  | 3492  | 3280  | 3461  | 3586  | 3918  | 4179  | 3942  | 3554  | 3698  | 3662  | 3365  | 2386  | 3405  | 3349  | 2876  | 4490  | 3860  | 3796  | Lap3       |
| Lapm4a     | 22571 | 18944 | 21041 | 20348 | 18425 | 19462 | 20619 | 21900 | 20337 | 19554 | 21539 | 18169 | 19046 | 20266 | 22524 | 20814 | 19169 | 20323 | 18686 | 21908 | 19951 | 17817 | 23488 | 20466 | 18624 | 21833 | 18999 | 20749 | Lapm4a     |
| Lapm4b     | 4274  | 4206  | 4087  | 3505  | 3599  | 3402  | 3378  | 2533  | 2622  | 2345  | 2684  | 2223  | 2609  | 2221  | 4199  | 4399  | 3640  | 3458  | 3497  | 3693  | 3521  | 2226  | 3109  | 2065  | 1994  | 2443  | 2224  | 2509  | Lapm4b     |
| Lapm5      | 648   | 846   | 1040  | 693   | 788   | 812   | 584   | 639   | 972   | 1026  | 1123  | 972   | 1004  | 721   | 630   | 917   | 720   | 916   | 824   | 669   | 764   | 1046  | 1265  | 879   | 946   | 1077  | 953   | 802   | Lapm5      |
| Large1     | 4014  | 4106  | 4040  | 4965  | 5359  | 4652  | 5317  | 3863  | 4205  | 4621  | 4133  | 3999  | 3816  | 3843  | 4002  | 3724  | 4638  | 5102  | 5532  | 3840  | 5519  | 4684  | 4049  | 4073  | 4496  | 3703  | 3546  | 3783  | Large1     |
| Large2     | 464   | 371   | 575   | 248   | 172   | 198   | 118   | 250   | 391   | 261   | 308   | 335   | 348   | 277   | 352   | 499   | 356   | 179   | 186   | 143   | 119   | 227   | 399   | 266   | 456   | 329   | 379   | 421   | Large2     |
| Larp1      | 11590 | 12323 | 15957 | 15475 | 15219 | 13911 | 13132 | 9515  | 10704 | 13082 | 13263 | 13799 | 12447 | 12526 | 11006 | 12626 | 15921 | 15699 | 15127 | 10999 | 13950 | 13256 | 10290 | 13166 | 13715 | 12542 | 11431 | 12773 | Larp1      |
| Larp1b     | 1175  | 1058  | 1393  | 1505  | 1386  | 1390  | 1581  | 426   | 431   | 478   | 568   | 441   | 468   | 488   | 1139  | 1113  | 1376  | 1531  | 1340  | 1119  | 1465  | 578   | 399   | 476   | 538   | 413   | 451   | 502   | Larp1b     |
| Larp4      | 9003  | 7477  | 7973  | 8558  | 7586  | 8764  | 8533  | 8081  | 7042  | 5987  | 6937  | 7193  | 7007  | 7641  | 9356  | 8383  | 7756  | 7899  | 7786  | 9411  | 8334  | 6547  | 7159  | 6584  | 7073  | 6452  | 7632  | 7510  | Larp4      |
| Larp4b     | 14021 | 12120 | 11652 | 13560 | 12249 | 12656 | 14190 | 9664  | 9154  | 9135  | 8836  | 9674  | 9003  | 10040 | 13471 | 12350 | 12150 | 12536 | 12066 | 13697 | 13942 | 8731  | 8700  | 9075  | 9554  | 8941  | 9861  | 9855  | Larp4b     |
| Larp6      | 99    | 105   | 98    | 107   | 241   | 133   | 123   | 269   | 353   | 359   | 363   | 223   | 255   | 237   | 100   | 90    | 143   | 147   | 171   | 113   | 163   | 429   | 343   | 324   | 383   | 189   | 242   | 220   | Larp6      |
| Larp7      | 2786  | 2558  | 3629  | 2242  | 1888  | 2103  | 2278  | 5797  | 4952  | 4784  | 4896  | 6600  | 5865  | 7152  | 2846  | 2316  | 2802  | 1955  | 2323  | 2691  | 2189  | 4346  | 4885  | 5924  | 5051  | 8040  | 7599  | 7552  | Larp7      |
| Lars       | 10657 | 9758  | 9782  | 8351  | 8330  | 8447  | 9451  | 7988  | 7731  | 6698  | 6705  | 8393  | 7834  | 8509  | 10411 | 9794  | 8717  | 8212  | 8301  | 10228 | 8636  | 6198  | 7337  | 7359  | 6941  | 8415  | 8510  | 8552  | Lars       |
| Lars2      | 14493 | 24509 | 13629 | 21050 | 18320 | 28120 | 17465 | 17267 | 13058 | 21891 | 11971 | 38706 | 12528 | 22297 | 9047  | 9868  | 12465 | 21665 | 18463 | 10960 | 12908 | 16298 | 11128 | 15707 | 11626 | 13237 | 34586 | 14432 | Lars2      |
| Las1l      | 7754  | 7915  | 7881  | 8248  | 8603  | 8199  | 8532  | 6007  | 5629  | 5988  | 5861  | 5681  | 5662  | 5988  | 8093  | 7080  | 7985  | 8445  | 7774  | 8593  | 8268  | 6107  | 5231  | 5800  | 6557  | 5627  | 5768  | 5834  | Las1l      |
| Lasp1      | 10530 | 11222 | 12557 | 13064 | 13651 | 13012 | 11962 | 10182 | 12039 | 13370 | 13269 | 13091 | 12086 | 12476 | 9939  | 10790 | 13770 | 13727 | 14125 | 10613 | 12784 | 14130 | 11814 | 13691 | 13653 | 14082 | 11640 | 11746 | Lasp1      |
| Lat        | 105   | 152   | 190   | 206   | 142   | 137   | 165   | 120   | 114   | 114   | 121   | 133   | 146   | 74    | 111   | 139   | 220   | 202   | 195   | 129   | 126   | 160   | 117   | 98    | 131   | 124   | 145   | 116   | Lat        |
| Lat2       | 559   | 797   | 985   | 1189  | 904   | 846   | 920   | 232   | 247   | 322   | 229   | 349   | 349   | 319   | 601   | 648   | 1167  | 1221  | 1011  | 777   | 976   | 373   | 234   | 393   | 342   | 434   | 280   | 366   | Lat2       |
| Lats1      | 0     | 0     | 0     | 0     | 0     | 0     | 0     | 0     | 0     | 1     | 0     | 0     | 0     | 0     | 0     | 0     | 0     | 0     | 2     | 0     | 0     | 0     | 0     | 0     | 0     | 0     | 0     | 0     | Lats1      |
| Lats2      | 1067  | 893   | 1398  | 1189  | 1293  | 1220  | 1033  | 1152  | 990   | 1248  | 1417  | 1228  | 1387  | 1228  | 940   | 1137  | 1402  | 1262  | 1149  | 895   | 1139  | 1290  | 1188  | 1273  | 1146  | 1464  | 1177  | 1260  | Lats2      |
| Lax1       | 240   | 284   | 238   | 270   | 326   | 253   | 222   | 56    | 62    | 52    | 92    | 36    | 60    | 30    | 269   | 401   | 283   | 344   | 238   | 225   | 245   | 37    | 91    | 38    | 37    | 31    | 42    | 44    | Lax1       |
| Layn       | 393   | 258   | 272   | 236   | 273   | 303   | 216   | 92    | 124   | 79    | 129   | 75    | 85    | 60    | 282   | 329   | 270   | 224   | 237   | 226   | 230   | 97    | 142   | 83    | 129   | 92    | 56    | 69    | Layn       |
| Lbh        | 6448  | 7283  | 7956  | 8776  | 9696  | 8051  | 8119  | 10352 | 10358 | 10944 | 10469 | 10269 | 10981 | 7238  | 6149  | 8576  | 8228  | 8659  | 8612  | 7797  | 12392 | 9638  | 10490 | 12041 | 10497 | 10629 | 10905 | Lbh   |            |
| Lbhd1      | 1254  | 1029  | 1052  | 998   | 947   | 968   | 1141  | 819   | 742   | 720   | 664   | 822   | 759   | 862   | 1228  | 1078  | 951   | 884   | 997   | 977   | 1107  | 692   | 680   | 773   | 701   | 894   | 834   | 1041  | Lbhd1      |
| Lbhd2      | 0     | 1     | 0     | 0     | 1     | 4     | 2     | 2     | 8     | 7     | 21    | 1     |       |       |       |       |       |       |       |       |       |       |       |       |       |       |       |       |            |

|          |       |       |       |       |       |       |       |       |       |       |       |       |       |       |       |       |       |       |       |       |       |       |       |       |       |       |       |        |          |
|----------|-------|-------|-------|-------|-------|-------|-------|-------|-------|-------|-------|-------|-------|-------|-------|-------|-------|-------|-------|-------|-------|-------|-------|-------|-------|-------|-------|--------|----------|
| Ldb2     | 1397  | 1263  | 1256  | 1237  | 1342  | 1324  | 1256  | 1474  | 1647  | 1668  | 2055  | 1196  | 1650  | 1415  | 1356  | 1672  | 1041  | 1434  | 1360  | 1280  | 1500  | 1828  | 2069  | 1622  | 1718  | 1499  | 1374  | 1329   | Ldb2     |
| Ldb3     | 38    | 41    | 46    | 33    | 89    | 70    | 42    | 103   | 180   | 89    | 991   | 36    | 79    | 60    | 47    | 48    | 34    | 44    | 57    | 35    | 42    | 175   | 658   | 58    | 53    | 51    | 60    | 56     | Ldb3     |
| Ldc1     | 25    | 23    | 0     | 18    | 29    | 19    | 13    | 23    | 35    | 34    | 11    | 40    | 40    | 2     | 13    | 43    | 2     | 14    | 29    | 20    | 18    | 22    | 99    | 7     | 19    | 1     | 5     | 8      | Ldc1     |
| Ldha     | 31661 | 28917 | 26723 | 21318 | 17201 | 22658 | 18134 | 22297 | 26592 | 21885 | 23027 | 23315 | 25484 | 24839 | 27606 | 26827 | 24839 | 20520 | 21850 | 23190 | 19025 | 17326 | 28405 | 24246 | 20451 | 32416 | 27041 | 28769  | Ldha     |
| Ldhal6b  | 42    | 46    | 25    | 59    | 35    | 43    | 48    | 53    | 67    | 91    | 55    | 66    | 50    | 51    | 42    | 50    | 22    | 39    | 52    | 45    | 42    | 43    | 63    | 48    | 57    | 10    | 41    | 68     | Ldhal6b  |
| Ldhb     | 10912 | 12958 | 10810 | 11374 | 10566 | 10076 | 11706 | 10833 | 10821 | 10085 | 9510  | 10820 | 9443  | 10904 | 11236 | 11139 | 11502 | 9798  | 11956 | 12518 | 11701 | 8758  | 10174 | 10722 | 10486 | 12612 | 10412 | 11056  | Ldhb     |
| Ldhc     | 0     | 0     | 0     | 0     | 2     | 0     | 1     | 1     | 2     | 3     | 2     | 0     | 0     | 0     | 3     | 0     | 0     | 0     | 0     | 0     | 0     | 0     | 1     | 2     | 0     | 0     | 6     | 0      | Ldhc     |
| Ldhd     | 14    | 21    | 14    | 19    | 25    | 16    | 12    | 20    | 39    | 32    | 22    | 12    | 34    | 16    | 9     | 23    | 16    | 17    | 24    | 19    | 15    | 50    | 30    | 29    | 25    | 25    | 21    | 18     | Ldhd     |
| Lldr     | 2337  | 2728  | 3257  | 2237  | 1919  | 2060  | 1805  | 2252  | 2528  | 2685  | 2671  | 3950  | 4082  | 4023  | 2197  | 2626  | 2843  | 2204  | 1928  | 1570  | 1770  | 2369  | 2236  | 3180  | 2792  | 3954  | 4645  | 4653   | Lldr     |
| Lldrad1  | 6     | 7     | 0     | 0     | 4     | 3     | 1     | 1     | 0     | 0     | 1     | 4     | 5     | 0     | 1     | 5     | 3     | 2     | 3     | 3     | 5     | 2     | 2     | 3     | 0     | 2     | 1     | 2      | Lldrad1  |
| Lldrad2  | 17    | 10    | 7     | 3     | 8     | 19    | 7     | 9     | 22    | 10    | 13    | 26    | 25    | 4     | 5     | 10    | 2     | 8     | 5     | 1     | 9     | 42    | 32    | 4     | 10    | 8     | 7     | 2      | Lldrad2  |
| Lldrad3  | 4841  | 4304  | 4660  | 4431  | 4345  | 4441  | 4293  | 4330  | 4186  | 4454  | 4903  | 4907  | 4897  | 4781  | 4874  | 4279  | 4256  | 4329  | 4147  | 4332  | 4372  | 4472  | 4503  | 4363  | 4434  | 4938  | 4865  | 5124   | Lldrad3  |
| Lldrad4  | 450   | 453   | 227   | 389   | 551   | 577   | 381   | 532   | 637   | 631   | 772   | 457   | 578   | 424   | 419   | 575   | 311   | 501   | 444   | 361   | 474   | 478   | 751   | 447   | 580   | 204   | 553   | 349    | Lldrad4  |
| Lldrap1  | 1780  | 1866  | 1589  | 1378  | 898   | 1177  | 746   | 700   | 930   | 808   | 999   | 556   | 756   | 500   | 1255  | 2167  | 1352  | 1405  | 1051  | 747   | 730   | 525   | 1095  | 891   | 525   | 892   | 660   | 616    | Lldrap1  |
| Ldoc1    | 30    | 34    | 35    | 20    | 59    | 36    | 38    | 33    | 43    | 28    | 41    | 15    | 31    | 21    | 26    | 45    | 24    | 22    | 48    | 36    | 28    | 72    | 24    | 20    | 21    | 13    | 20    | 12     | Ldoc1    |
| Leap2    | 3     | 6     | 0     | 2     | 2     | 6     | 7     | 4     | 2     | 7     | 0     | 2     | 3     | 2     | 3     | 5     | 6     | 0     | 4     | 4     | 2     | 7     | 0     | 5     | 4     | 2     | 7     | 11     | Leap2    |
| Lect2    | 0     | 0     | 0     | 0     | 0     | 0     | 0     | 0     | 0     | 0     | 0     | 0     | 0     | 0     | 0     | 1     | 2     | 0     | 0     | 0     | 0     | 0     | 0     | 0     | 0     | 0     | 0     | 0      | Lect2    |
| Lef1     | 2450  | 1810  | 3169  | 2188  | 1856  | 1862  | 1793  | 1932  | 1977  | 2233  | 1687  | 3132  | 2879  | 2983  | 1863  | 2091  | 2460  | 2092  | 2427  | 1646  | 1963  | 2065  | 1960  | 2997  | 2236  | 2875  | 2989  | 3551   | Lef1     |
| Lefty1   | 44    | 87    | 68    | 68    | 21    | 37    | 23    | 7     | 27    | 12    | 24    | 10    | 20    | 14    | 78    | 88    | 42    | 59    | 30    | 20    | 25    | 13    | 36    | 20    | 18    | 20    | 26    | 19     | Lefty1   |
| Lefty2   | 8     | 6     | 0     | 3     | 15    | 8     | 7     | 4     | 9     | 4     | 19    | 4     | 1     | 3     | 4     | 5     | 3     | 17    | 4     | 15    | 15    | 10    | 9     | 4     | 22    | 3     | 0     | 2      | Lefty2   |
| Lekr1    | 679   | 523   | 604   | 566   | 650   | 599   | 637   | 512   | 487   | 447   | 442   | 458   | 451   | 498   | 675   | 657   | 581   | 653   | 485   | 621   | 620   | 508   | 553   | 476   | 472   | 467   | 458   | 496    | Lekr1    |
| Lemd1    | 200   | 219   | 172   | 313   | 327   | 319   | 344   | 482   | 447   | 564   | 535   | 642   | 541   | 731   | 227   | 174   | 350   | 335   | 348   | 264   | 382   | 622   | 432   | 546   | 659   | 365   | 733   | 654    | Lemd1    |
| Lemd2    | 2844  | 3504  | 3694  | 3916  | 3805  | 3647  | 3081  | 3171  | 3660  | 3986  | 3986  | 4264  | 4102  | 3673  | 2651  | 3016  | 3833  | 3761  | 4094  | 3073  | 3296  | 4067  | 3620  | 4380  | 4498  | 4327  | 4106  | 4190   | Lemd2    |
| Lemd3    | 3279  | 2389  | 3241  | 3568  | 3530  | 3490  | 3572  | 3022  | 2771  | 3429  | 3260  | 3382  | 3302  | 3455  | 3144  | 2928  | 3008  | 3425  | 3444  | 3062  | 3417  | 3369  | 2683  | 3394  | 3533  | 3380  | 3134  | 3474   | Lemd3    |
| Lenep    | 1     | 1     | 0     | 8     | 0     | 0     | 2     | 0     | 1     | 3     | 0     | 0     | 0     | 0     | 1     | 0     | 0     | 1     | 0     | 2     | 1     | 3     | 0     | 0     | 0     | 5     | 0     | 2      | Lenep    |
| Leng1    | 1336  | 1757  | 2061  | 2033  | 1577  | 1471  | 1493  | 771   | 778   | 1012  | 945   | 976   | 892   | 1007  | 1316  | 1527  | 2129  | 1826  | 1635  | 1431  | 1599  | 867   | 764   | 987   | 936   | 1117  | 949   | 1025   | Leng1    |
| Leng8    | 15246 | 18565 | 20099 | 21803 | 21419 | 20924 | 22218 | 19615 | 20818 | 25813 | 23339 | 29515 | 26528 | 29711 | 14893 | 14968 | 22130 | 20588 | 22696 | 17914 | 21510 | 27294 | 18396 | 28089 | 27357 | 26326 | 26164 | 26631  | Leng8    |
| Leng9    | 257   | 242   | 249   | 256   | 275   | 254   | 222   | 219   | 239   | 220   | 300   | 172   | 191   | 170   | 214   | 240   | 258   | 288   | 264   | 207   | 187   | 172   | 237   | 266   | 206   | 226   | 192   | 217    | Leng9    |
| Leo1     | 3466  | 3848  | 4572  | 3953  | 3471  | 3392  | 3476  | 3274  | 3241  | 3754  | 3659  | 4096  | 3775  | 4552  | 3224  | 3227  | 4183  | 3441  | 3496  | 3378  | 3437  | 3527  | 3154  | 4162  | 3819  | 4756  | 4331  | 4376   | Leo1     |
| Lep      | 0     | 0     | 0     | 0     | 0     | 0     | 0     | 0     | 0     | 0     | 0     | 0     | 0     | 0     | 0     | 0     | 0     | 0     | 0     | 0     | 0     | 0     | 1     | 0     | 0     | 0     | 0     | 0      | Lep      |
| Lepr     | 1215  | 609   | 571   | 554   | 810   | 1033  | 660   | 1341  | 1629  | 1198  | 2076  | 732   | 1103  | 772   | 1092  | 1212  | 561   | 999   | 450   | 646   | 632   | 1579  | 2289  | 1115  | 1031  | 699   | 790   | 642    | Lepr     |
| Leprot   | 4624  | 3904  | 4357  | 5928  | 4104  | 4084  | 3918  | 4473  | 4394  | 3868  | 3902  | 3738  | 3936  | 3880  | 4623  | 4125  | 3797  | 4040  | 4035  | 4501  | 4156  | 4229  | 4779  | 3898  | 3734  | 4257  | 3993  | 4010   | Leprot   |
| Leprot1  | 3937  | 3778  | 4205  | 5207  | 5443  | 5153  | 5461  | 5318  | 4597  | 5606  | 4775  | 5419  | 5202  | 5617  | 4377  | 3534  | 4895  | 5133  | 5073  | 5351  | 5171  | 5558  | 4368  | 5760  | 5921  | 5372  | 5761  | 5416   | Leprot1  |
| Letm1    | 2915  | 2738  | 3002  | 3184  | 3427  | 3483  | 3001  | 4162  | 4287  | 5211  | 4353  | 4779  | 4348  | 4649  | 2554  | 2692  | 3298  | 3159  | 3564  | 3046  | 3181  | 4502  | 4171  | 4981  | 5041  | 5137  | 4565  | 4594   | Letm1    |
| Letm2    | 765   | 827   | 942   | 1105  | 1207  | 1084  | 999   | 1161  | 1141  | 1324  | 1382  | 1165  | 1263  | 1206  | 869   | 725   | 1160  | 1054  | 1205  | 1045  | 1040  | 1335  | 1169  | 1280  | 1254  | 953   | 1281  | 1085   | Letm2    |
| LetmD1   | 2788  | 3256  | 3037  | 3183  | 3308  | 2859  | 3329  | 3326  | 3540  | 3551  | 3406  | 3729  | 3509  | 3828  | 2909  | 2846  | 3318  | 3223  | 3313  | 2969  | 3309  | 3606  | 3387  | 3662  | 3649  | 3719  | 3542  | 3796   | LetmD1   |
| Lexm     | 2     | 13    | 3     | 5     | 0     | 6     | 3     | 5     | 12    | 6     | 8     | 8     | 34    | 24    | 4     | 2     | 9     | 0     | 5     | 4     | 2     | 7     | 16    | 8     | 17    | 16    | 17    | 34     | Lexm     |
| Lfng     | 1044  | 1475  | 1382  | 1143  | 1152  | 1066  | 1131  | 1704  | 1786  | 1777  | 1655  | 2467  | 2146  | 2271  | 1076  | 1048  | 1549  | 1124  | 1441  | 1168  | 1144  | 1394  | 1772  | 2155  | 1942  | 2560  | 2328  | 2336   | Lfng     |
| Lgals1   | 13205 | 11501 | 9888  | 6187  | 3365  | 7686  | 2546  | 8954  | 12994 | 16722 | 15478 | 8060  | 11551 | 7493  | 10802 | 12365 | 7310  | 9102  | 3585  | 4062  | 2968  | 6086  | 17018 | 9130  | 6595  | 8889  | 9360  | 8568   | Lgals1   |
| Lgals12  | 74    | 34    | 44    | 60    | 67    | 38    | 44    | 73    | 123   | 81    | 70    | 72    | 43    | 51    | 41    | 57    | 39    | 39    | 80    | 48    | 60    | 69    | 94    | 101   | 66    | 58    | 42    | 44     | Lgals12  |
| Lgals2   | 2     | 0     | 0     | 1     | 1     | 0     | 0     | 0     | 6     | 0     | 1     | 0     | 1     | 0     | 0     | 2     | 0     | 6     | 0     | 1     | 0     | 2     | 1     | 2     | 0     | 0     | 0     | 0      | Lgals2   |
| Lgals3   | 30    | 61    | 16    | 63    | 58    | 55    | 74    | 42    | 74    | 51    | 100   | 23    | 22    | 24    | 42    | 51    | 57    | 89    | 59    | 48    | 70    | 20    | 58    | 38    | 44    | 10    | 31    | 28     | Lgals3   |
| Lgals3bp | 213   | 280   | 240   | 270   | 301   | 238   | 228   | 153   | 245   | 326   | 294   | 180   | 237   | 160   | 187   | 266   | 227   | 326   | 242   | 286   | 299   | 272   | 294   | 237   | 245   | 155   | 193   | 193    | Lgals3bp |
| Lgals4   | 98    | 126   | 102   | 127   | 145   | 114   | 124   | 160   | 183   | 213   | 235   | 125   | 181   | 186   | 140   | 131   | 166   | 142   | 149   | 104   | 125   | 224   | 211   | 173   | 136   | 164   | 137   | 142    | Lgals4   |
| Lgals7   | 89    | 142   | 85    | 140   | 247   | 240   | 92    | 267   | 398   | 328   | 248   | 152   | 335   | 166   | 127   | 156   | 126   | 217   | 169   | 210   | 139   | 259   | 412   | 288   | 251   | 129   | 209   | 190    | Lgals7   |
| Lgals8   | 2431  | 2110  | 2146  | 2105  | 2194  | 2315  | 2168  | 1314  | 1354  | 1344  | 1571  | 1148  | 1368  | 1227  | 2414  | 2317  | 2059  | 2298  | 1979  | 2259  | 2151  | 1504  | 1111  | 1360  | 1132  | 1231  | 1162  | Lgals8 |          |
| Lgals9   | 299   | 330   | 283   | 219   | 209   | 343   | 143   | 408   | 516   | 418   | 582   | 356   | 424   | 332   | 380   | 381   | 198   | 342   | 178   | 292   | 231   | 530   | 789   | 486   | 425   | 385   | 350   | 324    | Lgals9   |
| LgalsS   | 3252  | 2255  | 2986  | 2716  | 3637  | 3290  | 3588  | 4364  | 4412  | 3955  | 4009  | 3221  | 3351  | 36381 | 3451  | 2672  | 2726  | 3090  | 3165  | 3559  | 3593  | 4258  | 4412  | 3716  | 4012  | 3300  | 3192  | 3414   | LgalsS   |
| Lgi1     | 133   | 81    | 59    | 134   | 336   | 216   | 219   | 546   | 637   | 810   | 729   | 467   | 420   | 361   | 140   | 79    | 108   | 142   | 243   | 261   | 273   | 879   | 840   | 456   | 697   | 223   | 328   | 295    | Lgi1     |
| Lgi2     | 1414  | 966   | 1279  | 1297  | 1497  | 1504  | 1164  | 2034  | 1906  | 1910  | 2172  | 996   | 1310  | 957   | 1158  | 1301  | 1198  | 1422  | 1244  | 1024  | 1124  | 1875  | 2208  | 1654  | 1415  | 988   | 898   | 885    | Lgi2     |
| Lgi3     | 97    | 211   | 123   | 176   | 397   | 197   | 144   | 214   | 247   | 225   | 302   | 76    | 294   | 79    | 245   | 220   | 165   | 223   | 203   | 215   | 167   | 276   | 254   | 102   | 139   | 63    | 59    | 57     | Lgi3     |



|        |       |       |       |       |       |       |       |       |       |       |       |       |       |       |       |       |       |       |       |       |       |       |       |       |       |       |       |       |        |
|--------|-------|-------|-------|-------|-------|-------|-------|-------|-------|-------|-------|-------|-------|-------|-------|-------|-------|-------|-------|-------|-------|-------|-------|-------|-------|-------|-------|-------|--------|
| Lig3   | 7248  | 7178  | 5889  | 6125  | 6098  | 6924  | 7017  | 9662  | 9141  | 8472  | 7819  | 9350  | 8970  | 9302  | 7232  | 5977  | 5904  | 5442  | 6496  | 6998  | 6603  | 8241  | 8761  | 8349  | 8603  | 8020  | 9518  | 9145  | Lig3   |
| Lig4   | 2766  | 3029  | 2837  | 3288  | 2825  | 2778  | 3101  | 2816  | 2168  | 2299  | 2063  | 2285  | 2130  | 2274  | 2970  | 2742  | 3042  | 3270  | 2748  | 3166  | 2943  | 2632  | 2137  | 2258  | 2506  | 2230  | 2434  | 2403  | Lig4   |
| Lir4b  | 3     | 1     | 0     | 1     | 2     | 0     | 3     | 4     | 12    | 0     | 23    | 7     | 16    | 10    | 4     | 2     | 1     | 0     | 0     | 7     | 5     | 7     | 16    | 5     | 7     | 7     | 3     | 4     | Lir4b  |
| Lirfa5 | 3     | 0     | 0     | 7     | 1     | 1     | 3     | 2     | 2     | 8     | 6     | 4     | 1     | 1     | 0     | 0     | 0     | 3     | 0     | 1     | 2     | 3     | 4     | 2     | 3     | 2     | 1     | 6     | Lirfa5 |
| Lirfa6 | 0     | 0     | 0     | 0     | 0     | 0     | 0     | 1     | 0     | 0     | 0     | 0     | 5     | 1     | 0     | 0     | 1     | 0     | 0     | 0     | 0     | 0     | 3     | 0     | 5     | 0     | 0     | 0     | Lirfa6 |
| Lirb4a | 12    | 8     | 9     | 1     | 11    | 13    | 15    | 31    | 8     | 16    | 38    | 5     | 15    | 14    | 9     | 13    | 10    | 20    | 3     | 12    | 6     | 18    | 42    | 15    | 23    | 22    | 6     | 25    | Lirb4a |
| Lim1   | 8056  | 8200  | 7365  | 7672  | 6388  | 7249  | 6754  | 5598  | 6703  | 5996  | 7509  | 5434  | 5675  | 5430  | 7354  | 7795  | 7493  | 7275  | 7237  | 6327  | 6346  | 4562  | 7009  | 6579  | 5042  | 7452  | 4898  | 5003  | Lim1   |
| Limch1 | 5725  | 5036  | 4914  | 3803  | 4673  | 5536  | 4063  | 7468  | 8268  | 7516  | 7942  | 7090  | 8921  | 7313  | 5906  | 6257  | 4285  | 4801  | 4321  | 4329  | 4261  | 6269  | 8201  | 7174  | 7001  | 5858  | 7211  | 7283  | Limch1 |
| Limd1  | 6810  | 7097  | 6448  | 6215  | 5678  | 5809  | 5757  | 4325  | 5044  | 4445  | 4674  | 5483  | 5382  | 4851  | 6211  | 6805  | 6261  | 6083  | 6502  | 5464  | 5648  | 3721  | 4827  | 4485  | 4191  | 5732  | 5930  | 5245  | Limd1  |
| Limd2  | 2997  | 3600  | 3624  | 2765  | 2729  | 3092  | 2678  | 5062  | 5984  | 5886  | 5553  | 6539  | 6747  | 6820  | 2892  | 3221  | 3233  | 2591  | 2976  | 2732  | 2747  | 4296  | 5960  | 6481  | 5528  | 8108  | 6763  | 7131  | Limd2  |
| Lime1  | 3     | 7     | 0     | 1     | 0     | 0     | 7     | 1     | 0     | 2     | 2     | 2     | 0     | 1     | 2     | 0     | 0     | 1     | 0     | 1     | 0     | 2     | 3     | 0     | 0     | 0     | 1     | 1     | Lime1  |
| Limk1  | 6747  | 8718  | 9047  | 10167 | 9984  | 8669  | 8076  | 4297  | 5050  | 5706  | 5589  | 5982  | 5051  | 5348  | 6707  | 7418  | 10343 | 10324 | 10387 | 6930  | 9071  | 6004  | 4846  | 5618  | 6202  | 5708  | 5055  | 5345  | Limk1  |
| Limk2  | 9878  | 11485 | 10011 | 11778 | 13493 | 12414 | 11579 | 8701  | 9074  | 9791  | 8837  | 9018  | 9161  | 8240  | 10309 | 10722 | 11631 | 12765 | 13150 | 11121 | 12291 | 10333 | 8791  | 9121  | 9962  | 7258  | 8684  | 8496  | Limk2  |
| Lims1  | 15741 | 11486 | 11997 | 10640 | 8832  | 10699 | 11268 | 9062  | 8230  | 6483  | 8162  | 7999  | 9039  | 8541  | 15191 | 14495 | 10119 | 11115 | 9192  | 11725 | 10002 | 7240  | 8758  | 7138  | 7123  | 8438  | 8666  | 9062  | Lims1  |
| Lims2  | 67    | 109   | 116   | 85    | 106   | 89    | 74    | 84    | 101   | 96    | 150   | 121   | 151   | 117   | 78    | 114   | 100   | 80    | 96    | 47    | 67    | 112   | 102   | 98    | 94    | 87    | 182   | 127   | Lims2  |
| Lin28a | 359   | 292   | 586   | 256   | 177   | 220   | 181   | 94    | 63    | 111   | 119   | 304   | 338   | 346   | 306   | 298   | 392   | 174   | 223   | 199   | 155   | 157   | 69    | 203   | 125   | 267   | 507   | 495   | Lin28a |
| Lin28b | 2620  | 2035  | 2879  | 2169  | 2346  | 2413  | 2699  | 2301  | 1771  | 2059  | 1835  | 2575  | 2129  | 2839  | 2781  | 2163  | 2553  | 2068  | 2394  | 2342  | 2490  | 2582  | 1630  | 2020  | 2233  | 2457  | 3004  | 2948  | Lin28b |
| Lin37  | 1100  | 1486  | 1206  | 1310  | 975   | 1097  | 1069  | 830   | 742   | 845   | 796   | 863   | 736   | 852   | 1073  | 1012  | 1250  | 1032  | 1116  | 1055  | 1087  | 744   | 757   | 881   | 828   | 843   | 787   | 949   | Lin37  |
| Lin52  | 1857  | 2011  | 1763  | 1762  | 1713  | 1748  | 2200  | 1596  | 1388  | 1286  | 1233  | 1505  | 1448  | 1610  | 1987  | 1837  | 1757  | 1864  | 1766  | 2017  | 2113  | 1439  | 1316  | 1485  | 1576  | 1702  | 1548  | 1631  | Lin52  |
| Lin7a  | 563   | 673   | 438   | 684   | 1168  | 945   | 860   | 1520  | 1308  | 1139  | 1148  | 771   | 1146  | 805   | 930   | 727   | 643   | 859   | 919   | 1050  | 902   | 1581  | 1197  | 687   | 1155  | 295   | 782   | 744   | Lin7a  |
| Lin7b  | 386   | 626   | 575   | 610   | 475   | 527   | 421   | 71    | 84    | 100   | 85    | 83    | 66    | 80    | 398   | 594   | 492   | 706   | 500   | 483   | 424   | 92    | 98    | 64    | 86    | 88    | 57    | 72    | Lin7b  |
| Lin7c  | 16470 | 13432 | 15637 | 17223 | 18920 | 18170 | 20775 | 23338 | 17664 | 17020 | 16346 | 18409 | 17430 | 19839 | 20181 | 15108 | 16989 | 17216 | 17218 | 21965 | 19418 | 21221 | 17877 | 17417 | 20939 | 16139 | 18986 | 18778 | Lin7c  |
| Lin9   | 1210  | 917   | 1102  | 1044  | 1193  | 1066  | 1187  | 2331  | 1888  | 1732  | 1733  | 2165  | 1792  | 2354  | 1246  | 951   | 1089  | 865   | 1329  | 1388  | 1171  | 1815  | 1768  | 2065  | 1979  | 2402  | 2243  | 2249  | Lin9   |
| Lingo1 | 614   | 954   | 920   | 1368  | 2450  | 1602  | 1341  | 1934  | 2380  | 3021  | 2398  | 1568  | 1852  | 1462  | 828   | 879   | 1189  | 1487  | 1895  | 1407  | 1533  | 3385  | 2263  | 1987  | 2673  | 1120  | 1291  | 1327  | Lingo1 |
| Lingo2 | 206   | 194   | 69    | 233   | 461   | 463   | 374   | 650   | 591   | 510   | 527   | 281   | 227   | 289   | 235   | 158   | 151   | 274   | 248   | 422   | 453   | 465   | 672   | 422   | 481   | 358   | 217   | 215   | Lingo2 |
| Lingo3 | 246   | 202   | 215   | 200   | 281   | 197   | 203   | 92    | 95    | 128   | 105   | 63    | 52    | 65    | 164   | 217   | 217   | 219   | 225   | 172   | 223   | 110   | 97    | 93    | 82    | 106   | 57    | 69    | Lingo3 |
| Lingo4 | 54    | 60    | 23    | 47    | 115   | 72    | 102   | 46    | 60    | 32    | 49    | 43    | 52    | 49    | 47    | 32    | 48    | 58    | 70    | 86    | 70    | 47    | 67    | 37    | 68    | 11    | 79    | 51    | Lingo4 |
| Lins1  | 1347  | 1234  | 1120  | 1169  | 1176  | 1189  | 1312  | 2019  | 1851  | 1763  | 1832  | 1869  | 1858  | 1958  | 1349  | 1205  | 1167  | 1176  | 1230  | 1211  | 1213  | 1947  | 1820  | 1711  | 1948  | 1686  | 1887  | 1889  | Lins1  |
| Lipa   | 5188  | 4548  | 4877  | 3803  | 3325  | 3933  | 3148  | 2475  | 2501  | 2428  | 2773  | 2207  | 2541  | 2105  | 5023  | 5339  | 3768  | 4044  | 3368  | 3502  | 3196  | 2618  | 3275  | 2411  | 2134  | 2251  | 2306  | 2270  | Lipa   |
| Lipc   | 0     | 0     | 0     | 0     | 2     | 1     | 1     | 2     | 7     | 3     | 4     | 2     | 5     | 0     | 0     | 0     | 0     | 0     | 0     | 2     | 3     | 3     | 8     | 2     | 1     | 1     | 3     | 9     | Lipc   |
| Lipe   | 1035  | 1452  | 1387  | 1443  | 1293  | 1261  | 1190  | 508   | 741   | 796   | 604   | 690   | 640   | 607   | 974   | 1261  | 1504  | 1371  | 1455  | 1194  | 1183  | 640   | 633   | 770   | 703   | 738   | 645   | 584   | Lipe   |
| Lipf   | 0     | 0     | 0     | 0     | 0     | 0     | 0     | 0     | 0     | 0     | 2     | 0     | 0     | 0     | 0     | 0     | 0     | 0     | 0     | 0     | 0     | 0     | 1     | 0     | 0     | 0     | 0     | 0     | Lipf   |
| Lipg   | 863   | 1040  | 783   | 759   | 781   | 775   | 882   | 805   | 840   | 725   | 576   | 709   | 531   | 728   | 957   | 914   | 972   | 746   | 890   | 799   | 818   | 630   | 484   | 835   | 909   | 730   | 560   | 468   | Lipg   |
| Liph   | 29    | 27    | 36    | 7     | 21    | 11    | 18    | 28    | 38    | 18    | 31    | 23    | 16    | 21    | 17    | 36    | 15    | 10    | 19    | 7     | 18    | 15    | 36    | 16    | 17    | 17    | 26    | 13    | Liph   |
| Lipi   | 0     | 0     | 0     | 4     | 1     | 6     | 2     | 4     | 1     | 5     | 1     | 0     | 0     | 0     | 0     | 1     | 0     | 0     | 0     | 1     | 2     | 12    | 4     | 1     | 5     | 5     | 7     | 6     | Lipi   |
| Lipk   | 0     | 0     | 0     | 0     | 2     | 0     | 0     | 1     | 2     | 0     | 2     | 0     | 0     | 0     | 0     | 0     | 0     | 0     | 0     | 0     | 0     | 0     | 2     | 0     | 0     | 0     | 0     | 0     | Lipk   |
| Lipm   | 8     | 0     | 11    | 0     | 0     | 1     | 0     | 72    | 45    | 65    | 7     | 0     | 3     | 3     | 4     | 1     | 0     | 0     | 0     | 0     | 0     | 3     | 56    | 15    | 0     | 6     | 1     | 0     | Lipm   |
| Lipo2  | 0     | 4     | 15    | 4     | 9     | 10    | 8     | 23    | 21    | 38    | 25    | 42    | 14    | 37    | 5     | 7     | 9     | 0     | 3     | 3     | 10    | 27    | 22    | 17    | 46    | 26    | 20    | 18    | Lipo2  |
| Lipo3  | 349   | 256   | 401   | 322   | 447   | 387   | 314   | 1003  | 922   | 922   | 885   | 1102  | 1072  | 1109  | 407   | 336   | 299   | 281   | 327   | 373   | 348   | 1308  | 1019  | 999   | 1012  | 937   | 1074  | 1069  | Lipo3  |
| Lipo4  | 0     | 1     | 0     | 0     | 0     | 0     | 0     | 0     | 0     | 0     | 0     | 0     | 0     | 0     | 0     | 0     | 0     | 0     | 0     | 0     | 0     | 2     | 0     | 2     | 0     | 2     | 0     | 0     | Lipo4  |
| Lipt1  | 316   | 347   | 358   | 249   | 236   | 286   | 279   | 308   | 291   | 223   | 276   | 261   | 247   | 246   | 351   | 368   | 355   | 300   | 293   | 341   | 252   | 266   | 308   | 270   | 230   | 281   | 324   | 277   | Lipt1  |
| Lipt2  | 465   | 381   | 318   | 296   | 275   | 249   | 341   | 506   | 492   | 483   | 428   | 450   | 522   | 471   | 454   | 351   | 363   | 310   | 341   | 290   | 298   | 453   | 542   | 489   | 394   | 514   | 475   | 549   | Lipt2  |
| Litaf  | 3910  | 3587  | 3585  | 3013  | 2699  | 2812  | 2826  | 1988  | 2278  | 2165  | 2442  | 2095  | 2352  | 2066  | 3588  | 3921  | 3262  | 2883  | 2802  | 2810  | 2655  | 1716  | 2158  | 2061  | 1867  | 2655  | 1978  | 2149  | Litaf  |
| Lix1   | 3438  | 3149  | 3734  | 2560  | 2316  | 2909  | 3148  | 3197  | 2865  | 2476  | 2380  | 4379  | 3584  | 3736  | 3287  | 2650  | 3270  | 2306  | 2724  | 3456  | 2502  | 1962  | 2308  | 3140  | 3005  | 5536  | 3983  | 4797  | Lix1   |
| Lix1a  | 12701 | 11512 | 14433 | 15217 | 14395 | 13659 | 14777 | 9673  | 8873  | 10519 | 10325 | 10317 | 10104 | 11544 | 12083 | 11078 | 15425 | 15162 | 14994 | 11656 | 15073 | 10972 | 9304  | 11261 | 11089 | 11055 | 9716  | 11208 | Lix1a  |
| Llcf1  | 3     | 0     | 0     | 0     | 1     | 0     | 0     | 1     | 0     | 0     | 0     | 0     | 0     | 0     | 0     | 0     | 0     | 2     | 0     | 0     | 1     | 0     | 0     | 1     | 0     | 0     | 0     | 0     | Llcf1  |
| Llg1   | 9118  | 12139 | 12710 | 11112 | 10196 | 10177 | 9595  | 8398  | 10285 | 10466 | 9445  | 14356 | 11639 | 11602 | 8805  | 10121 | 12863 | 10836 | 11871 | 9015  | 9572  | 10151 | 9027  | 12293 | 10835 | 14699 | 12191 | 12447 | Llg1   |
| Llg2   | 674   | 809   | 707   | 622   | 378   | 378   | 295   | 193   | 208   | 218   | 205   | 136   | 236   | 103   | 562   | 946   | 616   | 621   | 401   | 325   | 279   | 139   | 305   | 252   | 94    | 251   | 134   | 148   | Llg2   |
| Llph   | 3028  | 3303  | 4797  | 4142  | 3031  | 3313  | 3733  | 2303  | 2084  | 2683  | 2620  | 3004  | 2794  | 3325  | 3158  | 3115  | 4220  | 3623  | 3376  | 3945  | 3270  | 1686  | 2204  | 3067  | 2859  | 3557  | 3068  | 3398  | Llph   |
| Lman1  | 10135 | 8899  | 8724  | 6985  | 6081  | 6621  | 5912  | 8680  | 8860  | 7686  | 8953  | 7679  | 5897  | 7588  | 9759  | 10449 | 7676  | 7289  | 5532  | 6811  | 5990  | 8166  | 9820  | 7663  | 6912  | 7823  | 8364  | 8003  | Lman1  |
| Lman1l | 5     | 42    | 37    | 61    | 50    | 48    | 44    | 16    | 2     | 17    | 17    | 14    | 14    | 19    | 24    | 43    | 37    | 62    | 60    | 35    | 38    | 12    | 8     | 11    | 9     | 1     |       |       |        |

|         |      |       |       |       |      |      |      |       |       |       |       |       |       |       |       |      |       |       |      |       |      |       |       |       |       |      |       |       |         |
|---------|------|-------|-------|-------|------|------|------|-------|-------|-------|-------|-------|-------|-------|-------|------|-------|-------|------|-------|------|-------|-------|-------|-------|------|-------|-------|---------|
| Lnpdp   | 8421 | 6267  | 6208  | 7212  | 7508 | 8670 | 7786 | 6398  | 6159  | 5690  | 6582  | 5854  | 6035  | 6160  | 7559  | 7067 | 6149  | 7103  | 6685 | 7191  | 7635 | 6071  | 5809  | 5172  | 6360  | 4701 | 5922  | 5417  | Lnpdp   |
| Lnpk    | 7614 | 5573  | 5079  | 5895  | 6155 | 7417 | 7347 | 5680  | 4778  | 4305  | 4592  | 4964  | 5346  | 5623  | 8446  | 6903 | 5468  | 6209  | 5692 | 7853  | 7242 | 4650  | 4642  | 4051  | 4858  | 3755 | 5542  | 5178  | Lnpk    |
| Lnx1    | 119  | 83    | 36    | 74    | 185  | 94   | 78   | 105   | 136   | 146   | 116   | 59    | 51    | 68    | 49    | 79   | 61    | 59    | 104  | 104   | 100  | 135   | 136   | 101   | 137   | 71   | 83    | 51    | Lnx1    |
| Lnx2    | 1301 | 1360  | 1444  | 1282  | 1245 | 1225 | 1108 | 835   | 964   | 846   | 887   | 779   | 852   | 783   | 1188  | 1404 | 1319  | 1275  | 1237 | 1108  | 1101 | 695   | 974   | 877   | 702   | 1067 | 739   | 771   | Lnx2    |
| Lonp1   | 8996 | 10706 | 11713 | 11320 | 8642 | 8850 | 8739 | 5263  | 6251  | 6823  | 6887  | 7297  | 6899  | 7119  | 8443  | 9864 | 11288 | 10270 | 9663 | 8072  | 8980 | 5922  | 5834  | 7418  | 6985  | 8381 | 7331  | 7411  | Lonp1   |
| Lonp2   | 9703 | 10255 | 8495  | 9010  | 9070 | 8750 | 9531 | 6735  | 6157  | 5431  | 5688  | 5924  | 5598  | 5846  | 10533 | 9252 | 9135  | 9098  | 8961 | 10150 | 9519 | 6061  | 6395  | 5393  | 5903  | 5452 | 5871  | 5694  | Lonp2   |
| Lonrf1  | 1696 | 1773  | 1786  | 2261  | 2437 | 2086 | 1999 | 1647  | 1747  | 1707  | 1737  | 1634  | 1632  | 1655  | 1800  | 1648 | 2153  | 2225  | 2177 | 2024  | 2123 | 2124  | 1733  | 1617  | 1814  | 1593 | 1600  | 1589  | Lonrf1  |
| Lonrf2  | 3429 | 3760  | 3204  | 6134  | 9507 | 7115 | 7968 | 6702  | 6299  | 7502  | 6787  | 5027  | 4339  | 4953  | 4225  | 3401 | 5132  | 6759  | 7657 | 6462  | 8461 | 9929  | 5974  | 5828  | 8401  | 3003 | 4198  | 4330  | Lonrf2  |
| Lonrf3  | 1172 | 1266  | 577   | 979   | 1136 | 1286 | 1335 | 393   | 339   | 225   | 232   | 414   | 268   | 391   | 1212  | 1010 | 817   | 1004  | 1141 | 1585  | 1339 | 169   | 279   | 215   | 326   | 130  | 390   | 357   | Lonrf3  |
| Lor     | 14   | 25    | 53    | 54    | 61   | 49   | 23   | 40    | 51    | 96    | 116   | 73    | 70    | 54    | 36    | 20   | 37    | 47    | 45   | 30    | 23   | 100   | 76    | 74    | 60    | 70   | 60    | 53    | Lor     |
| Lox     | 3665 | 2581  | 3250  | 2945  | 1707 | 4995 | 1275 | 6662  | 10764 | 7727  | 13335 | 5436  | 6489  | 5947  | 3948  | 3804 | 2807  | 5820  | 1354 | 1616  | 1260 | 6667  | 14444 | 8560  | 7239  | 5110 | 5831  | 5250  | Lox     |
| Loxhd1  | 2    | 0     | 0     | 6     | 0    | 0    | 1    | 0     | 6     | 5     | 0     | 0     | 0     | 0     | 3     | 2    | 8     | 0     | 5    | 1     | 4    | 10    | 3     | 0     | 0     | 0    | 0     | 1     | Loxhd1  |
| Lox1    | 1059 | 1402  | 1312  | 897   | 616  | 912  | 435  | 717   | 1185  | 1086  | 1254  | 797   | 1090  | 777   | 1013  | 1616 | 1085  | 1091  | 591  | 472   | 463  | 1039  | 1482  | 999   | 877   | 1065 | 966   | 745   | Lox1    |
| Lox2    | 3609 | 3097  | 3273  | 1797  | 1252 | 2246 | 1048 | 2644  | 2961  | 2679  | 4891  | 2628  | 3200  | 2666  | 3306  | 3931 | 2336  | 2341  | 1252 | 964   | 1103 | 2488  | 4383  | 2857  | 2110  | 3052 | 2786  | 3012  | Lox2    |
| Lox3    | 1082 | 1348  | 1343  | 901   | 837  | 1033 | 594  | 878   | 1455  | 1365  | 1997  | 1143  | 1449  | 774   | 1122  | 1571 | 1053  | 930   | 872  | 789   | 655  | 1268  | 1540  | 1106  | 1053  | 1244 | 1115  | 1029  | Lox3    |
| Lox4    | 20   | 15    | 26    | 4     | 6    | 11   | 4    | 17    | 35    | 40    | 114   | 18    | 43    | 15    | 16    | 23   | 27    | 14    | 12   | 2     | 4    | 32    | 49    | 33    | 15    | 21   | 23    | 9     | Lox4    |
| Lpar1   | 2833 | 1833  | 2414  | 1377  | 1192 | 1650 | 1269 | 3013  | 3825  | 2648  | 4509  | 3094  | 4420  | 3244  | 2232  | 2707 | 1647  | 1526  | 1323 | 1405  | 1113 | 2481  | 4313  | 3155  | 2490  | 4174 | 3560  | 3588  | Lpar1   |
| Lpar2   | 1797 | 1858  | 1827  | 1790  | 1777 | 1740 | 1762 | 1315  | 1391  | 1290  | 1313  | 1546  | 1506  | 1534  | 1582  | 1819 | 1878  | 1727  | 1965 | 1704  | 1791 | 1417  | 1312  | 1376  | 1429  | 1768 | 1370  | 1549  | Lpar2   |
| Lpar3   | 53   | 41    | 93    | 103   | 44   | 31   | 41   | 27    | 33    | 31    | 32    | 18    | 24    | 33    | 59    | 100  | 73    | 46    | 30   | 27    | 29   | 30    | 26    | 29    | 21    | 25   | 33    | 21    | Lpar3   |
| Lpar4   | 2503 | 1595  | 2244  | 1763  | 1609 | 1848 | 1680 | 2198  | 2210  | 1654  | 3133  | 1698  | 2338  | 1825  | 2467  | 2331 | 1824  | 1858  | 1640 | 2132  | 1614 | 1915  | 2698  | 1778  | 1591  | 2160 | 2183  | 2086  | Lpar4   |
| Lpar5   | 9    | 10    | 7     | 11    | 8    | 7    | 12   | 6     | 12    | 12    | 13    | 11    | 16    | 6     | 5     | 4    | 16    | 18    | 8    | 13    | 17   | 23    | 14    | 19    | 17    | 13   | 9     | 17    | Lpar5   |
| Lpar6   | 1057 | 674   | 801   | 657   | 738  | 807  | 765  | 1457  | 1339  | 1221  | 1264  | 1455  | 1809  | 1511  | 989   | 805  | 735   | 547   | 773  | 903   | 807  | 1043  | 1621  | 1392  | 1203  | 1562 | 1751  | 1778  | Lpar6   |
| Lpcat1  | 6473 | 7197  | 7707  | 6972  | 6514 | 6475 | 6583 | 5534  | 5535  | 5910  | 5638  | 6714  | 6749  | 6754  | 6628  | 6942 | 7238  | 6464  | 6782 | 6073  | 6485 | 5937  | 5520  | 6147  | 6396  | 7097 | 6598  | 7124  | Lpcat1  |
| Lpcat2  | 654  | 562   | 524   | 583   | 614  | 552  | 513  | 435   | 508   | 480   | 536   | 345   | 375   | 301   | 686   | 759  | 462   | 577   | 506  | 637   | 491  | 493   | 582   | 403   | 309   | 379  | 225   | 254   | Lpcat2  |
| Lpcat2b | 0    | 1     | 6     | 0     | 0    | 2    | 1    | 0     | 0     | 0     | 0     | 0     | 0     | 0     | 0     | 0    | 0     | 3     | 1    | 0     | 0    | 0     | 0     | 0     | 0     | 0    | 0     | 0     | Lpcat2b |
| Lpcat3  | 1821 | 2172  | 1907  | 1644  | 1661 | 1597 | 1604 | 1275  | 1508  | 1345  | 1386  | 1294  | 1437  | 1253  | 1795  | 2230 | 1734  | 1799  | 1438 | 1625  | 1555 | 1280  | 1566  | 1179  | 1242  | 1415 | 1323  | 1317  | Lpcat3  |
| Lpcat4  | 851  | 898   | 1091  | 1001  | 1109 | 955  | 824  | 757   | 891   | 1022  | 954   | 949   | 902   | 833   | 692   | 997  | 1118  | 910   | 1162 | 857   | 821  | 1071  | 877   | 969   | 946   | 937  | 872   | 805   | Lpcat4  |
| Lpgat1  | 7827 | 6028  | 6319  | 6842  | 9007 | 8799 | 8685 | 12174 | 11161 | 11418 | 11941 | 11334 | 11429 | 11718 | 7793  | 7094 | 6995  | 7434  | 8187 | 7803  | 8773 | 11939 | 10788 | 10962 | 12620 | 8613 | 11347 | 11013 | Lpgat1  |
| Lpin1   | 2700 | 3221  | 2765  | 3653  | 3814 | 3369 | 3356 | 2179  | 2042  | 2333  | 2105  | 2192  | 2370  | 2117  | 2880  | 3152 | 3274  | 3550  | 3895 | 3280  | 3622 | 2774  | 1994  | 2254  | 2491  | 1566 | 2077  | 2134  | Lpin1   |
| Lpin2   | 7919 | 7796  | 5967  | 6608  | 7159 | 6988 | 6963 | 5964  | 6264  | 5846  | 5904  | 5944  | 5836  | 6023  | 7207  | 8170 | 6383  | 6973  | 6857 | 7199  | 7057 | 5459  | 5834  | 5501  | 5675  | 5245 | 5817  | 6045  | Lpin2   |
| Lpin3   | 156  | 84    | 93    | 90    | 64   | 60   | 50   | 60    | 105   | 67    | 81    | 59    | 79    | 20    | 105   | 132  | 79    | 65    | 43   | 66    | 42   | 62    | 126   | 83    | 18    | 60   | 43    | 46    | Lpin3   |
| Lpl     | 1624 | 1351  | 1718  | 1129  | 1140 | 1303 | 1353 | 1678  | 1469  | 1457  | 1722  | 2133  | 1875  | 2100  | 1834  | 1744 | 1410  | 1209  | 1214 | 1749  | 1273 | 1290  | 1696  | 1554  | 1639  | 2294 | 2251  | 2080  | Lpl     |
| Lpo     | 9    | 10    | 8     | 6     | 4    | 10   | 17   | 18    | 19    | 25    | 22    | 29    | 48    | 33    | 11    | 9    | 6     | 1     | 16   | 5     | 14   | 35    | 21    | 23    | 39    | 24   | 14    | 23    | Lpo     |
| Lpp     | 4469 | 3125  | 3389  | 2446  | 2174 | 3335 | 2061 | 3717  | 4112  | 3818  | 5066  | 3630  | 4834  | 3488  | 3765  | 4988 | 2728  | 3119  | 1911 | 2094  | 1881 | 3628  | 4866  | 3544  | 3119  | 3408 | 4088  | 3877  | Lpp     |
| Lpxn    | 116  | 125   | 93    | 81    | 98   | 108  | 97   | 87    | 77    | 57    | 118   | 88    | 81    | 88    | 117   | 132  | 98    | 79    | 119  | 135   | 80   | 63    | 100   | 80    | 71    | 98   | 110   | 91    | Lpxn    |
| Lrat    | 20   | 30    | 16    | 28    | 32   | 12   | 21   | 7     | 7     | 10    | 8     | 7     | 5     | 6     | 18    | 31   | 13    | 19    | 19   | 24    | 18   | 23    | 11    | 7     | 5     | 8    | 16    | 4     | Lrat    |
| Lratd1  | 2524 | 2637  | 3329  | 3446  | 3850 | 3355 | 3604 | 3556  | 3647  | 3740  | 3582  | 3152  | 3276  | 3361  | 2674  | 2632 | 3516  | 4051  | 3684 | 2846  | 3521 | 4625  | 3435  | 3604  | 4373  | 2639 | 2847  | 2923  | Lratd1  |
| Lratd2  | 2157 | 1849  | 2570  | 2034  | 2027 | 1787 | 1862 | 1973  | 2183  | 2135  | 1869  | 2412  | 2759  | 1923  | 1961  | 2307 | 2166  | 1944  | 1743 | 1917  | 1850 | 2373  | 3100  | 1901  | 1729  | 2508 | 2086  | 2540  | Lratd2  |
| Lrba    | 4493 | 3992  | 3392  | 3312  | 3185 | 3778 | 2890 | 4428  | 4343  | 3703  | 4148  | 3978  | 5262  | 3937  | 4276  | 3848 | 3062  | 2838  | 2957 | 3660  | 3308 | 3686  | 4406  | 3095  | 3662  | 2135 | 5168  | 4470  | Lrba    |
| Lrch1   | 1057 | 917   | 1120  | 1201  | 1472 | 1417 | 1351 | 1324  | 1494  | 1620  | 1628  | 1200  | 1357  | 1290  | 1048  | 1146 | 1124  | 1180  | 1456 | 1094  | 1219 | 1576  | 1493  | 1388  | 1488  | 1318 | 1008  | 1195  | Lrch1   |
| Lrch2   | 6668 | 4659  | 5335  | 6995  | 8306 | 8974 | 9662 | 11085 | 8719  | 7925  | 7968  | 9179  | 8283  | 9822  | 7317  | 5718 | 6112  | 6930  | 8041 | 8884  | 9222 | 10198 | 8486  | 8693  | 9627  | 7627 | 9108  | 9248  | Lrch2   |
| Lrch3   | 9513 | 9462  | 7341  | 8528  | 9022 | 9459 | 9300 | 7999  | 7860  | 7585  | 8006  | 7993  | 7889  | 8340  | 8780  | 8541 | 7920  | 8800  | 8596 | 8907  | 9542 | 7762  | 7158  | 7249  | 8207  | 6602 | 8178  | 7471  | Lrch3   |
| Lrch4   | 17   | 22    | 10    | 27    | 20   | 16   | 13   | 16    | 14    | 12    | 13    | 15    | 11    | 13    | 20    | 22   | 38    | 33    | 16   | 22    | 17   | 20    | 11    | 19    | 9     | 8    | 7     | 11    | Lrch4   |
| Lrcol1  | 1    | 0     | 3     | 1     | 0    | 0    | 1    | 1     | 0     | 0     | 1     | 0     | 0     | 1     | 0     | 0    | 1     | 3     | 0    | 0     | 2    | 2     | 0     | 1     | 0     | 0    | 0     | 0     | Lrcol1  |
| Lrfn1   | 1891 | 2567  | 2434  | 2602  | 2723 | 2533 | 2113 | 1570  | 1761  | 2252  | 1862  | 1897  | 1675  | 1729  | 1642  | 2083 | 2808  | 2551  | 2866 | 2037  | 2359 | 2471  | 1676  | 1916  | 2145  | 1910 | 1591  | 1513  | Lrfn1   |
| Lrfn2   | 72   | 87    | 106   | 164   | 335  | 202  | 241  | 239   | 366   | 357   | 397   | 232   | 144   | 234   | 121   | 108  | 109   | 231   | 225  | 215   | 241  | 428   | 301   | 346   | 424   | 237  | 160   | 196   | Lrfn2   |
| Lrfn3   | 1314 | 1704  | 1877  | 1790  | 2116 | 1760 | 1526 | 960   | 1180  | 1389  | 1286  | 1240  | 1125  | 1025  | 1228  | 1452 | 1871  | 1909  | 1869 | 1333  | 1632 | 1526  | 1063  | 1267  | 1243  | 1245 | 1048  | 1002  | Lrfn3   |
| Lrfn4   | 1491 | 1681  | 1864  | 1764  | 2396 | 1979 | 1790 | 3684  | 4158  | 4349  | 3980  | 4512  | 3918  | 3692  | 1333  | 1335 | 2104  | 1752  | 2626 | 1928  | 1805 | 4084  | 3802  | 4484  | 4617  | 4751 | 4288  | 3793  | Lrfn4   |
| Lrfn5   | 451  | 406   | 253   | 677   | 1387 | 1036 | 1133 | 2069  | 1918  | 1784  | 1461  | 960   | 909   | 977   | 670   | 434  | 476   | 923   | 1072 | 1106  | 1197 | 2124  | 1564  | 1207  | 1918  | 684  | 710   | 706   |         |

|         |       |       |       |       |       |       |       |       |       |       |       |       |       |       |       |       |       |       |       |       |       |       |       |       |       |       |       |       |         |        |
|---------|-------|-------|-------|-------|-------|-------|-------|-------|-------|-------|-------|-------|-------|-------|-------|-------|-------|-------|-------|-------|-------|-------|-------|-------|-------|-------|-------|-------|---------|--------|
| Lrrc14b | 0     | 2     | 4     | 0     | 1     | 0     | 0     | 0     | 0     | 7     | 0     | 1     | 0     | 1     | 1     | 1     | 1     | 1     | 0     | 4     | 4     | 5     | 3     | 2     | 0     | 0     | 2     | 1     | Lrrc14b |        |
| Lrrc15  | 349   | 318   | 318   | 169   | 79    | 201   | 66    | 142   | 152   | 186   | 177   | 203   | 305   | 188   | 266   | 497   | 155   | 193   | 93    | 59    | 72    | 199   | 256   | 181   | 165   | 180   | 246   | 285   | Lrrc15  |        |
| Lrrc17  | 1789  | 1562  | 1314  | 844   | 397   | 1335  | 275   | 2125  | 3195  | 2452  | 3692  | 1826  | 2529  | 1668  | 1685  | 2132  | 833   | 1174  | 474   | 516   | 270   | 1973  | 4333  | 2065  | 1593  | 2111  | 1768  | 1914  | Lrrc17  |        |
| Lrrc18  | 100   | 83    | 117   | 64    | 128   | 121   | 98    | 37    | 48    | 40    | 46    | 39    | 45    | 24    | 95    | 138   | 82    | 87    | 85    | 92    | 77    | 42    | 93    | 46    | 44    | 61    | 31    | 30    | Lrrc18  |        |
| Lrrc19  | 0     | 0     | 0     | 0     | 2     | 0     | 0     | 0     | 0     | 0     | 0     | 0     | 0     | 0     | 0     | 2     | 0     | 0     | 2     | 0     | 0     | 0     | 0     | 0     | 0     | 0     | 0     | 0     | Lrrc19  |        |
| Lrrc2   | 5     | 7     | 1     | 7     | 5     | 1     | 6     | 10    | 24    | 28    | 31    | 8     | 6     | 16    | 11    | 5     | 0     | 2     | 1     | 5     | 7     | 17    | 17    | 14    | 18    | 9     | 8     | 8     | Lrrc2   |        |
| Lrrc20  | 2263  | 2525  | 2389  | 2738  | 2666  | 2611  | 2497  | 1664  | 1917  | 2077  | 1946  | 1980  | 1748  | 2148  | 2023  | 2246  | 2664  | 2572  | 2839  | 2262  | 2641  | 1778  | 1779  | 2178  | 2237  | 2255  | 2083  | 2066  | Lrrc20  |        |
| Lrrc23  | 153   | 264   | 261   | 191   | 282   | 207   | 215   | 223   | 278   | 280   | 266   | 349   | 429   | 278   | 239   | 260   | 200   | 183   | 217   | 234   | 215   | 301   | 444   | 270   | 237   | 315   | 275   | 288   | Lrrc23  |        |
| Lrrc24  | 143   | 244   | 215   | 322   | 398   | 324   | 283   | 231   | 267   | 273   | 253   | 210   | 201   | 192   | 216   | 213   | 287   | 349   | 353   | 317   | 328   | 336   | 253   | 185   | 306   | 119   | 156   | 176   | Lrrc24  |        |
| Lrrc25  | 22    | 29    | 31    | 25    | 25    | 23    | 13    | 45    | 64    | 60    | 82    | 56    | 49    | 44    | 22    | 35    | 24    | 15    | 14    | 19    | 22    | 42    | 88    | 52    | 39    | 49    | 45    | 50    | Lrrc25  |        |
| Lrrc26  | 1     | 0     | 0     | 0     | 1     | 0     | 0     | 0     | 2     | 0     | 0     | 1     | 0     | 0     | 0     | 0     | 1     | 0     | 0     | 0     | 1     | 0     | 4     | 0     | 0     | 0     | 0     | 0     | Lrrc26  |        |
| Lrrc27  | 22    | 14    | 6     | 8     | 6     | 7     | 8     | 38    | 16    | 10    | 10    | 13    | 15    | 4     | 12    | 6     | 9     | 4     | 17    | 13    | 4     | 20    | 8     | 17    | 17    | 10    | 73    | 11    | Lrrc27  |        |
| Lrrc28  | 2646  | 2907  | 2345  | 2710  | 2404  | 2206  | 2949  | 1564  | 1471  | 1355  | 1250  | 1347  | 1234  | 1465  | 2718  | 2585  | 2727  | 2669  | 2466  | 2587  | 2639  | 1382  | 1378  | 1391  | 1400  | 1409  | 1290  | 1445  | Lrrc28  |        |
| Lrrc29  | 182   | 148   | 95    | 110   | 138   | 119   | 114   | 137   | 162   | 161   | 169   | 178   | 204   | 166   | 157   | 122   | 129   | 105   | 117   | 143   | 128   | 159   | 152   | 157   | 113   | 203   | 152   | 145   | Lrrc29  |        |
| Lrrc3   | 1801  | 2211  | 1927  | 2007  | 2161  | 1827  | 1772  | 712   | 909   | 978   | 894   | 717   | 878   | 666   | 1907  | 2120  | 2055  | 1937  | 2095  | 1931  | 1975  | 998   | 923   | 753   | 883   | 630   | 607   | 608   | Lrrc3   |        |
| Lrrc30  | 2     | 2     | 1     | 0     | 1     | 0     | 0     | 1     | 4     | 1     | 8     | 0     | 2     | 0     | 0     | 0     | 0     | 0     | 0     | 0     | 0     | 0     | 6     | 0     | 0     | 0     | 2     | 0     | 0       | Lrrc30 |
| Lrrc31  | 2     | 2     | 0     | 1     | 6     | 0     | 1     | 5     | 9     | 7     | 3     | 0     | 2     | 0     | 1     | 5     | 0     | 3     | 0     | 3     | 4     | 8     | 5     | 0     | 5     | 0     | 2     | 2     | Lrrc31  |        |
| Lrrc32  | 624   | 886   | 839   | 589   | 615   | 620   | 438   | 338   | 567   | 426   | 691   | 569   | 724   | 499   | 530   | 958   | 620   | 898   | 472   | 430   | 482   | 511   | 622   | 521   | 455   | 508   | 522   | 470   | Lrrc32  |        |
| Lrrc34  | 108   | 116   | 140   | 85    | 79    | 84    | 63    | 83    | 108   | 71    | 72    | 108   | 175   | 79    | 174   | 181   | 87    | 79    | 71    | 111   | 57    | 99    | 139   | 56    | 49    | 89    | 58    | 83    | Lrrc34  |        |
| Lrrc36  | 52    | 66    | 54    | 58    | 59    | 60    | 53    | 164   | 97    | 101   | 79    | 160   | 196   | 145   | 70    | 76    | 93    | 50    | 59    | 101   | 57    | 107   | 99    | 88    | 88    | 96    | 203   | 154   | Lrrc36  |        |
| Lrrc37a | 0     | 0     | 0     | 0     | 0     | 0     | 0     | 0     | 0     | 0     | 0     | 0     | 0     | 0     | 0     | 0     | 0     | 0     | 0     | 0     | 0     | 0     | 0     | 2     | 0     | 0     | 0     | 0     | Lrrc37a |        |
| Lrrc39  | 15    | 10    | 18    | 7     | 10    | 6     | 7     | 13    | 12    | 18    | 43    | 21    | 46    | 17    | 7     | 10    | 12    | 4     | 6     | 15    | 10    | 7     | 41    | 16    | 15    | 30    | 15    | 37    | Lrrc39  |        |
| Lrrc3b  | 51    | 25    | 47    | 53    | 107   | 68    | 72    | 76    | 84    | 139   | 98    | 34    | 91    | 61    | 59    | 62    | 57    | 35    | 52    | 59    | 93    | 134   | 141   | 78    | 113   | 57    | 31    | 65    | Lrrc3b  |        |
| Lrrc3c  | 0     | 0     | 0     | 1     | 0     | 0     | 0     | 0     | 0     | 0     | 0     | 0     | 0     | 0     | 1     | 0     | 0     | 0     | 0     | 1     | 0     | 0     | 0     | 0     | 0     | 0     | 0     | 0     | Lrrc3c  |        |
| Lrrc4   | 204   | 241   | 334   | 313   | 716   | 503   | 495   | 1319  | 1147  | 1534  | 1293  | 1336  | 1198  | 1364  | 305   | 167   | 357   | 326   | 595   | 499   | 529   | 1726  | 1334  | 1475  | 1731  | 1166  | 1263  | 1406  | Lrrc4   |        |
| Lrrc40  | 8529  | 6658  | 6384  | 6312  | 5308  | 5811  | 6677  | 5893  | 4970  | 4149  | 4202  | 5246  | 4977  | 5544  | 8451  | 7011  | 6230  | 5816  | 5289  | 7172  | 6250  | 4503  | 4877  | 4789  | 4533  | 5446  | 5528  | 5572  | Lrrc40  |        |
| Lrrc41  | 2918  | 3486  | 3120  | 2864  | 3224  | 3017  | 2959  | 4512  | 4982  | 4256  | 4302  | 4281  | 4216  | 3895  | 2935  | 2956  | 3137  | 2792  | 3532  | 3308  | 3161  | 4139  | 4980  | 4015  | 4112  | 4590  | 4314  | 4450  | Lrrc41  |        |
| Lrrc42  | 6501  | 6412  | 7021  | 6171  | 5402  | 5557  | 5959  | 3395  | 3288  | 3262  | 3024  | 3385  | 3496  | 3671  | 6367  | 5833  | 6392  | 5751  | 6094  | 5737  | 5973  | 2904  | 3445  | 3395  | 3191  | 4404  | 3660  | 4018  | Lrrc42  |        |
| Lrrc43  | 14    | 24    | 4     | 17    | 34    | 26    | 15    | 15    | 13    | 34    | 5     | 27    | 35    | 10    | 17    | 17    | 15    | 13    | 22    | 19    | 21    | 20    | 34    | 14    | 23    | 9     | 26    | 18    | Lrrc43  |        |
| Lrrc45  | 5432  | 7173  | 6983  | 8020  | 7518  | 7136  | 6776  | 4410  | 4944  | 5710  | 5360  | 5727  | 5281  | 5096  | 5020  | 6361  | 7715  | 7649  | 7929  | 6272  | 6923  | 5561  | 4423  | 5938  | 5920  | 5134  | 5233  | 4853  | Lrrc45  |        |
| Lrrc46  | 206   | 270   | 216   | 227   | 172   | 145   | 138   | 138   | 135   | 176   | 133   | 155   | 167   | 128   | 220   | 188   | 220   | 152   | 147   | 147   | 159   | 150   | 146   | 145   | 144   | 184   | 135   | 151   | Lrrc46  |        |
| Lrrc47  | 6249  | 6565  | 7643  | 7959  | 6759  | 6484  | 5651  | 4822  | 4965  | 6054  | 5611  | 6528  | 5770  | 5446  | 5831  | 5515  | 7992  | 7242  | 7606  | 5866  | 6142  | 5658  | 4754  | 6682  | 6290  | 6949  | 6099  | 5765  | Lrrc47  |        |
| Lrrc49  | 3011  | 3035  | 2545  | 2564  | 3159  | 3075  | 3446  | 7299  | 6916  | 5543  | 4527  | 5829  | 4939  | 5925  | 3423  | 2699  | 2716  | 2607  | 3243  | 4030  | 3267  | 6554  | 5594  | 5095  | 6179  | 5423  | 5758  | 5795  | Lrrc49  |        |
| Lrrc4b  | 1167  | 1749  | 1824  | 2319  | 3310  | 2542  | 2357  | 5468  | 5530  | 7287  | 5605  | 6924  | 4974  | 6077  | 1315  | 1090  | 2352  | 2073  | 3352  | 2508  | 2616  | 7944  | 5050  | 7054  | 7991  | 6099  | 5960  | 5542  | Lrrc4b  |        |
| Lrrc4c  | 787   | 688   | 655   | 946   | 1424  | 1260  | 1557  | 1404  | 1310  | 1413  | 1241  | 1249  | 1181  | 1256  | 994   | 636   | 833   | 1058  | 1230  | 1363  | 1372  | 1601  | 1296  | 1093  | 1392  | 972   | 1177  | 1151  | Lrrc4c  |        |
| Lrrc51  | 219   | 260   | 160   | 238   | 187   | 173   | 172   | 167   | 181   | 160   | 135   | 142   | 156   | 149   | 237   | 260   | 231   | 204   | 167   | 212   | 201   | 149   | 236   | 127   | 161   | 191   | 143   | 134   | Lrrc51  |        |
| Lrrc52  | 0     | 0     | 0     | 0     | 0     | 3     | 0     | 0     | 0     | 0     | 4     | 0     | 0     | 0     | 0     | 0     | 0     | 0     | 0     | 0     | 0     | 0     | 0     | 0     | 1     | 0     | 0     | 0     | Lrrc52  |        |
| Lrrc55  | 356   | 283   | 301   | 536   | 1113  | 785   | 916   | 1053  | 1140  | 1084  | 894   | 668   | 533   | 765   | 426   | 264   | 458   | 590   | 953   | 822   | 935   | 1348  | 917   | 794   | 1109  | 478   | 638   | 497   | Lrrc55  |        |
| Lrrc56  | 1054  | 1201  | 961   | 955   | 965   | 915   | 981   | 1069  | 1149  | 1175  | 951   | 1317  | 1278  | 1177  | 928   | 908   | 1095  | 809   | 939   | 954   | 982   | 988   | 1122  | 1096  | 1114  | 1267  | 1277  | 1260  | Lrrc56  |        |
| Lrrc57  | 1490  | 1321  | 1350  | 1271  | 1373  | 1266  | 1529  | 1638  | 1503  | 1393  | 1347  | 1606  | 1388  | 1573  | 1556  | 1350  | 1344  | 1247  | 1495  | 1528  | 1368  | 1643  | 1530  | 1548  | 1574  | 1625  | 1557  | 1631  | Lrrc57  |        |
| Lrrc58  | 5832  | 3809  | 7247  | 6806  | 7234  | 7432  | 7364  | 6861  | 6732  | 8053  | 8764  | 8410  | 9121  | 8644  | 5764  | 5603  | 6691  | 7178  | 7021  | 5769  | 6948  | 8590  | 6954  | 8803  | 8464  | 10918 | 8748  | 8746  | Lrrc58  |        |
| Lrrc59  | 17117 | 18354 | 18436 | 16193 | 13995 | 14796 | 14251 | 11510 | 12162 | 12086 | 12297 | 13179 | 12998 | 12105 | 16220 | 15432 | 17260 | 15249 | 16250 | 14244 | 14654 | 11498 | 11989 | 12544 | 12153 | 15085 | 13204 | 13884 | Lrrc59  |        |
| Lrrc6   | 16    | 15    | 10    | 11    | 32    | 26    | 16    | 40    | 40    | 53    | 31    | 56    | 64    | 12    | 40    | 17    | 14    | 20    | 14    | 28    | 25    | 15    | 43    | 19    | 33    | 17    | 20    | 17    | Lrrc6   |        |
| Lrrc61  | 591   | 718   | 827   | 727   | 855   | 737   | 717   | 1599  | 1582  | 1807  | 1661  | 2034  | 1917  | 1963  | 703   | 551   | 772   | 664   | 821   | 679   | 675   | 1925  | 1535  | 2042  | 1962  | 2052  | 2136  | 2198  | Lrrc61  |        |
| Lrrc63  | 33    | 17    | 28    | 15    | 25    | 28    | 32    | 12    | 8     | 12    | 7     | 21    | 15    | 24    | 29    | 24    | 39    | 14    | 26    | 25    | 20    | 7     | 10    | 17    | 9     | 27    | 17    | 20    | Lrrc63  |        |
| Lrrc66  | 15    | 24    | 28    | 13    | 13    | 6     | 6     | 0     | 2     | 1     | 2     | 1     | 9     | 7     | 22    | 26    | 15    | 10    | 16    | 14    | 18    | 5     | 1     | 1     | 0     | 0     | 7     | 6     | Lrrc66  |        |
| Lrrc69  | 3     | 5     | 1     | 6     | 6     | 12    | 6     | 2     | 5     | 1     | 9     | 5     | 0     | 3     | 8     | 5     | 16    | 9     | 12    | 6     | 14    | 2     | 6     | 1     | 6     | 2     | 1     | 2     | Lrrc69  |        |
| Lrrc7   | 682   | 590   | 273   | 648   | 862   | 960   | 997   | 1851  | 2057  | 1149  | 917   | 892   | 582   | 898   | 752   | 498   | 457   | 580   | 795   | 1398  | 1050  | 1108  | 1613  | 1076  | 1361  | 575   | 702   | 665   | Lrrc7   |        |
| Lrrc71  | 22    | 42    | 25    | 13    | 31    | 21    | 6     | 20    | 29    | 31    | 34    | 33    | 52    | 17    | 17    | 45    | 20    | 17    | 17    | 10    | 14    | 60    | 46    | 11    | 28    | 24    | 31    | 11    | Lrrc71  |        |
| Lrrc72  | 1     | 0     | 0     | 0     | 0     | 0     | 0     | 0     | 0     | 0     | 4     | 4     | 0     | 0     | 0     | 1     | 0     | 0     | 0     | 0     | 0     | 0     | 3     | 1     | 0     | 0     | 0     | 0     | Lrrc72  |        |
| Lrrc73a | 576   | 881   | 713   | 1026  | 995   | 811   | 781   | 256   | 385   | 437   | 339   | 341   | 269   | 270   | 621   | 694   | 867   | 1070  | 926   | 756   | 819   | 495   | 335   | 337   | 393   | 337   | 303   | 248   | Lrrc73a |        |
| Lrrc74a | 0     | 0     | 0     | 3     | 0     | 3     | 0     | 0     | 1     | 0     | 0     | 0     | 1     | 1     | 1     | 0     | 0     | 0     | 1     | 2     | 5     | 2     | 0     | 2     | 0     | 0     | 0     | 4     | Lrrc74a |        |
| Lrrc74b | 37    | 30    | 18    |       |       |       |       |       |       |       |       |       |       |       |       |       |       |       |       |       |       |       |       |       |       |       |       |       |         |        |

|         |       |       |       |       |       |       |       |       |       |       |       |       |       |       |       |       |       |       |       |       |       |       |       |       |       |       |       |       |         |
|---------|-------|-------|-------|-------|-------|-------|-------|-------|-------|-------|-------|-------|-------|-------|-------|-------|-------|-------|-------|-------|-------|-------|-------|-------|-------|-------|-------|-------|---------|
| Lrsam1  | 1558  | 1756  | 1676  | 1826  | 1878  | 1539  | 1549  | 1938  | 2077  | 2301  | 2178  | 2066  | 2033  | 2039  | 1435  | 1565  | 1871  | 1760  | 1803  | 1577  | 1641  | 2346  | 2091  | 2083  | 2299  | 1725  | 2064  | 1836  | Lrsam1  |
| Lrtm1   | 40    | 18    | 39    | 6     | 3     | 13    | 4     | 32    | 39    | 40    | 77    | 78    | 99    | 38    | 22    | 30    | 3     | 0     | 0     | 5     | 4     | 42    | 75    | 14    | 10    | 28    | 73    | 68    | Lrtm1   |
| Lrtm2   | 186   | 201   | 235   | 377   | 679   | 557   | 542   | 228   | 253   | 361   | 254   | 161   | 88    | 128   | 229   | 193   | 319   | 504   | 647   | 429   | 548   | 384   | 285   | 219   | 314   | 72    | 76    | 72    | Lrtm2   |
| Lrwd1   | 2094  | 2459  | 2243  | 2135  | 2092  | 1988  | 1981  | 2451  | 2802  | 2827  | 2603  | 3151  | 2965  | 2936  | 1869  | 1998  | 2356  | 1872  | 2383  | 2031  | 1838  | 2408  | 2651  | 3117  | 2905  | 3773  | 3319  | 2959  | Lrwd1   |
| Lsamp   | 3699  | 3459  | 2686  | 4815  | 6559  | 6131  | 6090  | 4818  | 4415  | 4928  | 4688  | 3726  | 3725  | 4200  | 4141  | 3248  | 3716  | 5366  | 5262  | 5927  | 7028  | 6176  | 4192  | 3854  | 5508  | 2417  | 4005  | 3588  | Lsamp   |
| Lsg1    | 4196  | 4628  | 4487  | 3889  | 3511  | 3761  | 3528  | 3556  | 3654  | 3429  | 3215  | 4073  | 3861  | 3955  | 4146  | 4425  | 4016  | 3947  | 3680  | 4047  | 3382  | 3031  | 3509  | 3832  | 3560  | 4335  | 4250  | 4122  | Lsg1    |
| Lsm1    | 2225  | 2166  | 2056  | 2014  | 1726  | 1766  | 2144  | 1735  | 1481  | 1492  | 1304  | 1500  | 1405  | 1647  | 2203  | 2023  | 1893  | 2001  | 1746  | 2110  | 2102  | 1512  | 1468  | 1517  | 1497  | 1676  | 1593  | 1756  | Lsm1    |
| Lsm10   | 367   | 501   | 458   | 367   | 455   | 409   | 406   | 629   | 643   | 653   | 594   | 596   | 619   | 629   | 429   | 421   | 445   | 385   | 451   | 402   | 390   | 592   | 679   | 673   | 582   | 727   | 632   | 733   | Lsm10   |
| Lsm11   | 3496  | 3736  | 3606  | 5148  | 6276  | 5420  | 5463  | 3765  | 3395  | 4030  | 3866  | 3610  | 3602  | 3444  | 3529  | 3499  | 4591  | 5695  | 5866  | 4732  | 5944  | 4704  | 3402  | 3551  | 4683  | 2548  | 3489  | 3569  | Lsm11   |
| Lsm12   | 3164  | 3140  | 3663  | 3338  | 2847  | 2886  | 3368  | 3775  | 3582  | 3729  | 3412  | 4110  | 3758  | 4148  | 3076  | 2855  | 3385  | 3224  | 3061  | 3156  | 3155  | 3715  | 3592  | 3925  | 3920  | 4946  | 3900  | 4595  | Lsm12   |
| Lsm14a  | 10080 | 9048  | 12046 | 10367 | 9513  | 9668  | 10102 | 11839 | 10249 | 10374 | 10456 | 12756 | 11621 | 13074 | 10001 | 9523  | 11184 | 9672  | 9891  | 9614  | 9773  | 10646 | 10471 | 12281 | 11554 | 14139 | 13034 | 13943 | Lsm14a  |
| Lsm14b  | 12339 | 13723 | 15866 | 17437 | 17117 | 14586 | 18519 | 12485 | 11908 | 16132 | 12981 | 15825 | 13359 | 19778 | 12585 | 11714 | 17263 | 16321 | 17725 | 13681 | 19448 | 15154 | 11207 | 17240 | 17685 | 16004 | 15347 | 18493 | Lsm14b  |
| Lsm2    | 2152  | 2155  | 2557  | 2156  | 1625  | 1702  | 2198  | 1757  | 1828  | 2046  | 2110  | 2791  | 2419  | 3101  | 1779  | 1878  | 2417  | 1697  | 1932  | 1691  | 1872  | 1856  | 1706  | 2603  | 2105  | 3482  | 2618  | 3268  | Lsm2    |
| Lsm3    | 1491  | 1303  | 1378  | 1226  | 879   | 804   | 1241  | 1566  | 1301  | 1360  | 1054  | 1508  | 1128  | 1948  | 1532  | 830   | 1401  | 896   | 980   | 1053  | 1265  | 1108  | 1197  | 1674  | 1298  | 1759  | 1511  | 2040  | Lsm3    |
| Lsm4    | 879   | 981   | 1586  | 1155  | 929   | 998   | 867   | 990   | 1208  | 1422  | 1315  | 1455  | 1477  | 1609  | 872   | 840   | 1227  | 911   | 1146  | 960   | 777   | 844   | 970   | 1550  | 1365  | 1979  | 1640  | 1588  | Lsm4    |
| Lsm5    | 2024  | 1557  | 2530  | 2163  | 1494  | 1291  | 2322  | 1592  | 1194  | 1527  | 1390  | 1767  | 1602  | 2497  | 2181  | 1448  | 2162  | 1565  | 1768  | 1893  | 2335  | 892   | 1116  | 1824  | 1495  | 2233  | 1987  | 2624  | Lsm5    |
| Lsm6    | 3609  | 3404  | 4719  | 3419  | 2983  | 3192  | 3376  | 5202  | 4426  | 4635  | 4888  | 5635  | 5283  | 6377  | 3870  | 3074  | 3872  | 2945  | 3208  | 3692  | 3235  | 4294  | 4444  | 5465  | 5229  | 6756  | 5961  | 6681  | Lsm6    |
| Lsm7    | 1825  | 2121  | 2291  | 2240  | 1811  | 1687  | 1942  | 1838  | 2106  | 2095  | 2492  | 2447  | 2533  | 2444  | 1767  | 1703  | 2194  | 1909  | 1922  | 2322  | 1979  | 1526  | 2030  | 2564  | 2501  | 2908  | 2689  | 2730  | Lsm7    |
| Lsm8    | 3633  | 3321  | 3786  | 3788  | 3256  | 3094  | 4111  | 3951  | 3142  | 3209  | 3031  | 4069  | 3504  | 5232  | 3814  | 3224  | 3746  | 3398  | 3476  | 4100  | 3967  | 2953  | 3047  | 4157  | 3810  | 4576  | 4305  | 4771  | Lsm8    |
| Lsmem1  | 9     | 12    | 12    | 28    | 17    | 11    | 27    | 6     | 7     | 6     | 37    | 4     | 9     | 1     | 11    | 11    | 20    | 12    | 18    | 22    | 22    | 8     | 25    | 10    | 8     | 5     | 3     | 7     | Lsmem1  |
| Lsmem2  | 10    | 18    | 21    | 22    | 20    | 24    | 21    | 9     | 5     | 16    | 21    | 12    | 18    | 4     | 20    | 27    | 22    | 6     | 25    | 12    | 18    | 3     | 16    | 10    | 9     | 2     | 15    | 6     | Lsmem2  |
| Lsp1    | 427   | 428   | 441   | 269   | 200   | 276   | 144   | 642   | 844   | 639   | 1134  | 655   | 855   | 559   | 402   | 516   | 336   | 218   | 210   | 170   | 161   | 608   | 1174  | 609   | 546   | 715   | 759   | 707   | Lsp1    |
| Lsr     | 1051  | 1058  | 1236  | 1090  | 884   | 1011  | 960   | 723   | 844   | 916   | 733   | 906   | 855   | 959   | 876   | 1032  | 878   | 863   | 987   | 892   | 820   | 551   | 968   | 1025  | 778   | 1428  | 837   | 1030  | Lsr     |
| Lss     | 8772  | 10648 | 7062  | 8148  | 6789  | 7847  | 6987  | 6211  | 5827  | 5743  | 5255  | 7277  | 7473  | 7367  | 8793  | 9583  | 7426  | 7593  | 6984  | 7237  | 6975  | 5833  | 5023  | 5547  | 6591  | 5556  | 8229  | 7649  | Lss     |
| Lst1    | 46    | 50    | 43    | 38    | 49    | 33    | 60    | 61    | 78    | 66    | 92    | 39    | 69    | 82    | 30    | 48    | 31    | 61    | 14    | 29    | 46    | 52    | 92    | 63    | 82    | 86    | 58    | 72    | Lst1    |
| Lta     | 5     | 3     | 2     | 2     | 9     | 9     | 8     | 2     | 4     | 9     | 2     | 2     | 9     | 5     | 1     | 3     | 3     | 4     | 1     | 8     | 10    | 6     | 8     | 1     | 7     | 5     | 1     | Lta   |         |
| Lta4h   | 10010 | 9218  | 8458  | 7997  | 7244  | 7564  | 7926  | 5503  | 5599  | 4986  | 5590  | 5236  | 5303  | 5287  | 9517  | 9347  | 8265  | 8048  | 7526  | 7768  | 7794  | 5023  | 6009  | 5058  | 4698  | 6216  | 5453  | 5650  | Lta4h   |
| Ltb     | 5     | 7     | 5     | 5     | 5     | 1     | 1     | 6     | 19    | 10    | 25    | 26    | 10    | 7     | 4     | 5     | 8     | 2     | 2     | 3     | 2     | 17    | 30    | 11    | 7     | 9     | 10    | 11    | Ltb     |
| Ltb4r1  | 7     | 4     | 19    | 16    | 7     | 25    | 6     | 7     | 14    | 10    | 23    | 21    | 11    | 3     | 11    | 9     | 16    | 11    | 9     | 10    | 4     | 12    | 15    | 20    | 16    | 32    | 12    | 19    | Ltb4r1  |
| Ltb4r2  | 18    | 19    | 30    | 3     | 29    | 16    | 12    | 15    | 22    | 35    | 34    | 10    | 20    | 26    | 17    | 15    | 16    | 15    | 16    | 10    | 10    | 20    | 30    | 34    | 26    | 33    | 27    | 27    | Ltb4r2  |
| Ltbp1   | 3224  | 2070  | 1782  | 1500  | 1358  | 2163  | 1123  | 3224  | 5104  | 4098  | 6084  | 2108  | 2848  | 1888  | 2275  | 2974  | 1539  | 2436  | 1406  | 1113  | 1190  | 2732  | 5500  | 3755  | 2743  | 2487  | 2005  | 1950  | Ltbp1   |
| Ltbp2   | 47    | 50    | 30    | 118   | 80    | 98    | 13    | 172   | 386   | 284   | 485   | 66    | 128   | 60    | 37    | 85    | 37    | 231   | 12    | 23    | 7     | 234   | 408   | 285   | 264   | 56    | 77    | 42    | Ltbp2   |
| Ltbp3   | 1994  | 2128  | 2079  | 2578  | 2657  | 2686  | 1998  | 3121  | 4452  | 4794  | 5928  | 2852  | 3082  | 2598  | 1812  | 2299  | 2289  | 3112  | 2632  | 1883  | 2151  | 4111  | 4818  | 4551  | 3965  | 2995  | 2658  | 2357  | Ltbp3   |
| Ltbp4   | 3576  | 4388  | 5608  | 5161  | 3870  | 4039  | 3493  | 1768  | 2704  | 2606  | 3369  | 2687  | 2029  | 2107  | 2884  | 4021  | 5359  | 5211  | 4969  | 3252  | 3619  | 2316  | 2977  | 3106  | 2492  | 3182  | 2097  | 2019  | Ltbp4   |
| Ltbr    | 404   | 448   | 398   | 321   | 384   | 383   | 242   | 835   | 1046  | 1079  | 1094  | 971   | 997   | 772   | 339   | 458   | 374   | 370   | 345   | 261   | 289   | 926   | 1249  | 874   | 739   | 1076  | 965   | 825   | Ltbr    |
| Ltc4s   | 12    | 11    | 12    | 13    | 10    | 29    | 10    | 9     | 11    | 10    | 25    | 3     | 10    | 18    | 13    | 14    | 7     | 14    | 13    | 14    | 13    | 18    | 23    | 18    | 23    | 8     | 21    | 20    | Ltc4s   |
| Ltf     | 14    | 0     | 6     | 31    | 7     | 22    | 17    | 21    | 27    | 27    | 86    | 37    | 102   | 26    | 28    | 35    | 20    | 50    | 13    | 20    | 10    | 47    | 82    | 65    | 14    | 61    | 57    | 64    | Ltf     |
| Ltk     | 20    | 31    | 17    | 39    | 31    | 17    | 29    | 38    | 37    | 47    | 42    | 35    | 36    | 21    | 28    | 20    | 35    | 28    | 26    | 27    | 38    | 70    | 47    | 44    | 28    | 31    | 19    | 28    | Ltk     |
| Ltn1    | 10207 | 9253  | 6508  | 7610  | 7395  | 8059  | 8766  | 8862  | 7989  | 6645  | 7193  | 7342  | 7341  | 7622  | 10006 | 9314  | 6816  | 7658  | 7197  | 9050  | 8259  | 6679  | 7798  | 6179  | 7071  | 5295  | 7551  | 7068  | Ltn1    |
| LTO1    | 2403  | 2798  | 2885  | 2698  | 2233  | 2283  | 2324  | 2026  | 1884  | 2286  | 1866  | 2298  | 2002  | 2269  | 2285  | 2439  | 2772  | 2466  | 2638  | 2649  | 2222  | 1968  | 1912  | 2259  | 2261  | 2367  | 2312  | 2391  | LTO1    |
| Ltv1    | 3511  | 3135  | 3409  | 2656  | 2224  | 2273  | 2680  | 2942  | 2744  | 2722  | 3056  | 3058  | 2821  | 3216  | 3278  | 2947  | 2880  | 2426  | 2332  | 2830  | 2395  | 2445  | 2898  | 2685  | 2537  | 3476  | 3339  | 3377  | Ltv1    |
| Luc71   | 11951 | 11623 | 11390 | 13171 | 14307 | 14256 | 13604 | 19411 | 15999 | 16944 | 16794 | 17610 | 16629 | 17765 | 12686 | 10629 | 12573 | 13592 | 14324 | 14528 | 14480 | 18828 | 15172 | 17125 | 19071 | 15377 | 17462 | 17061 | Luc71   |
| Luc712  | 15939 | 12615 | 18753 | 19512 | 21341 | 22696 | 22256 | 26374 | 24568 | 29725 | 33335 | 33049 | 31433 | 37029 | 16804 | 14369 | 18884 | 19065 | 19734 | 19604 | 21287 | 30537 | 23498 | 31188 | 32157 | 30458 | 32584 | 33108 | Luc712  |
| Luc713  | 28813 | 23844 | 29120 | 31328 | 31560 | 32343 | 34564 | 40273 | 31494 | 33288 | 31424 | 34629 | 31439 | 36077 | 31898 | 26258 | 29300 | 30101 | 32028 | 37590 | 33410 | 36008 | 31127 | 34568 | 35251 | 33565 | 32947 | 34069 | Luc713  |
| Lum     | 7917  | 5657  | 7524  | 4103  | 2702  | 6069  | 2525  | 8852  | 12888 | 7510  | 11144 | 9145  | 11853 | 9272  | 8482  | 8530  | 4899  | 5804  | 2554  | 3499  | 2319  | 8671  | 15572 | 8264  | 7863  | 9305  | 10000 | 9772  | Lum     |
| Lurap1  | 1252  | 1027  | 1026  | 962   | 1042  | 1002  | 1102  | 359   | 325   | 278   | 284   | 248   | 235   | 253   | 1096  | 1083  | 1007  | 1011  | 1006  | 976   | 1018  | 284   | 330   | 253   | 227   | 322   | 235   | 239   | Lurap1  |
| Lurap11 | 371   | 358   | 358   | 399   | 435   | 341   | 394   | 348   | 355   | 398   | 365   | 236   | 346   | 277   | 376   | 339   | 396   | 417   | 458   | 543   | 421   | 384   | 389   | 301   | 340   | 246   | 306   | 267   | Lurap11 |
| Luzp1   | 9867  | 9306  | 6376  | 7573  | 7357  | 7907  | 7456  | 7380  | 6857  | 6156  | 6639  | 7357  | 7101  | 6886  | 9174  | 9224  | 6946  | 7679  | 7293  | 8057  | 7817  | 5773  | 6674  | 6105  | 6261  | 5289  | 7682  | 7363  | Luzp1   |
| Luzp2   | 672   | 550   | 634   | 766   | 1754  | 1527  | 1050  | 2441  | 2425  | 1933  |       |       |       |       |       |       |       |       |       |       |       |       |       |       |       |       |       |       |         |



|           |       |       |       |       |       |       |       |       |       |       |       |       |       |       |       |       |       |       |       |       |       |       |       |       |       |       |       |        |         |
|-----------|-------|-------|-------|-------|-------|-------|-------|-------|-------|-------|-------|-------|-------|-------|-------|-------|-------|-------|-------|-------|-------|-------|-------|-------|-------|-------|-------|--------|---------|
| Lyn       | 669   | 547   | 680   | 460   | 469   | 520   | 384   | 738   | 691   | 574   | 764   | 610   | 677   | 661   | 646   | 723   | 531   | 481   | 393   | 545   | 474   | 760   | 895   | 627   | 671   | 698   | 751   | 676    | Lyn     |
| Lynx1     | 768   | 860   | 1084  | 837   | 1003  | 846   | 769   | 194   | 291   | 234   | 273   | 169   | 189   | 741   | 777   | 985   | 767   | 947   | 801   | 752   | 266   | 370   | 199   | 163   | 136   | 245   | 153   | Lynx1  |         |
| Lypd1     | 775   | 931   | 776   | 1164  | 1976  | 1580  | 1329  | 1573  | 1851  | 2027  | 2011  | 1011  | 1210  | 1032  | 1038  | 922   | 1049  | 1328  | 1419  | 1450  | 1527  | 2176  | 1834  | 1356  | 1951  | 691   | 926   | 815    | Lypd1   |
| Lypd10    | 0     | 0     | 0     | 0     | 0     | 0     | 0     | 0     | 0     | 0     | 0     | 0     | 0     | 0     | 0     | 0     | 0     | 0     | 0     | 1     | 0     | 0     | 0     | 0     | 0     | 0     | 0     | 0      | Lypd10  |
| Lypd11    | 0     | 0     | 0     | 0     | 0     | 0     | 0     | 0     | 0     | 0     | 0     | 0     | 0     | 0     | 0     | 1     | 0     | 0     | 2     | 0     | 0     | 0     | 0     | 0     | 0     | 0     | 0     | 0      | Lypd11  |
| Lypd2     | 5     | 5     | 0     | 0     | 4     | 3     | 1     | 21    | 39    | 20    | 30    | 0     | 1     | 3     | 5     | 6     | 0     | 2     | 2     | 0     | 0     | 1     | 20    | 36    | 24    | 2     | 13    | 0      | Lypd2   |
| Lypd3     | 116   | 85    | 77    | 55    | 44    | 54    | 23    | 55    | 94    | 65    | 27    | 40    | 44    | 31    | 83    | 80    | 60    | 48    | 53    | 44    | 24    | 2     | 128   | 38    | 10    | 10    | 28    | 53     | Lypd3   |
| Lypd4     | 1     | 0     | 5     | 0     | 3     | 0     | 2     | 0     | 2     | 0     | 0     | 0     | 0     | 0     | 0     | 0     | 3     | 0     | 0     | 0     | 2     | 2     | 0     | 0     | 4     | 3     | 1     | 0      | Lypd4   |
| Lypd5     | 0     | 0     | 0     | 6     | 4     | 0     | 0     | 6     | 3     | 10    | 0     | 0     | 0     | 1     | 0     | 0     | 0     | 1     | 0     | 0     | 1     | 3     | 6     | 0     | 0     | 2     | 0     | 0      | Lypd5   |
| Lypd6     | 2222  | 1715  | 1667  | 1569  | 1743  | 1745  | 2281  | 1033  | 1135  | 1000  | 1004  | 1059  | 1067  | 1020  | 1994  | 1970  | 1579  | 1786  | 1725  | 1928  | 2122  | 1066  | 1241  | 1043  | 1093  | 1402  | 923   | 960    | Lypd6   |
| Lypd6b    | 140   | 94    | 60    | 82    | 126   | 161   | 95    | 265   | 352   | 205   | 252   | 140   | 138   | 195   | 116   | 104   | 75    | 76    | 97    | 124   | 147   | 249   | 390   | 254   | 229   | 156   | 109   | 153    | Lypd6b  |
| Lypd8     | 0     | 0     | 0     | 0     | 0     | 0     | 1     | 0     | 0     | 0     | 0     | 0     | 0     | 0     | 0     | 0     | 0     | 0     | 0     | 0     | 0     | 0     | 0     | 1     | 0     | 0     | 0     | 0      | Lypd8   |
| Lypd8l    | 0     | 0     | 0     | 0     | 0     | 0     | 0     | 0     | 0     | 0     | 0     | 0     | 0     | 0     | 0     | 0     | 0     | 0     | 0     | 0     | 0     | 0     | 0     | 0     | 2     | 0     | 0     | 0      | Lypd8l  |
| Lypd9     | 0     | 0     | 0     | 0     | 0     | 0     | 0     | 0     | 2     | 0     | 0     | 0     | 0     | 0     | 0     | 0     | 0     | 0     | 0     | 0     | 0     | 0     | 0     | 0     | 0     | 0     | 0     | 0      | Lypd9   |
| Lyp1a1    | 3652  | 2180  | 3353  | 2878  | 2743  | 3009  | 3179  | 3296  | 2874  | 2431  | 2865  | 3290  | 3500  | 3836  | 3493  | 3197  | 2938  | 2979  | 2709  | 2882  | 2997  | 2872  | 3014  | 2956  | 2845  | 3637  | 3466  | 4062   | Lyp1a1  |
| Lyp1a2    | 4418  | 5961  | 6258  | 6014  | 5919  | 4999  | 4986  | 3660  | 4491  | 4972  | 4258  | 4730  | 4645  | 4845  | 4618  | 5154  | 6411  | 5690  | 6482  | 5184  | 5222  | 4388  | 4212  | 5013  | 4983  | 5647  | 5075  | 4675   | Lyp1a2  |
| Lyp1a1l   | 482   | 376   | 533   | 391   | 348   | 383   | 417   | 795   | 718   | 611   | 629   | 638   | 743   | 718   | 501   | 483   | 415   | 314   | 355   | 418   | 363   | 642   | 671   | 604   | 661   | 705   | 600   | 694    | Lyp1a1l |
| Lyp1m1    | 281   | 242   | 253   | 285   | 322   | 312   | 291   | 388   | 335   | 354   | 312   | 306   | 273   | 330   | 305   | 240   | 245   | 289   | 302   | 389   | 319   | 343   | 343   | 289   | 392   | 248   | 331   | 301    | Lyp1m1  |
| Lyp1m2    | 1476  | 1341  | 1632  | 1337  | 1359  | 1418  | 1543  | 2286  | 2196  | 2268  | 2173  | 2662  | 2639  | 2880  | 1669  | 1301  | 1508  | 1301  | 1544  | 1637  | 1541  | 2169  | 2222  | 2380  | 2201  | 2989  | 3086  | 3053   | Lyp1m2  |
| Lyp1m4    | 1028  | 937   | 926   | 1120  | 964   | 923   | 1252  | 992   | 748   | 895   | 804   | 849   | 755   | 1111  | 1100  | 854   | 979   | 1030  | 990   | 1260  | 1196  | 851   | 914   | 885   | 967   | 900   | 1023  | Lyp1m4 |         |
| Lyp1m7    | 592   | 445   | 466   | 511   | 509   | 489   | 563   | 503   | 459   | 445   | 528   | 478   | 379   | 528   | 539   | 442   | 451   | 484   | 488   | 564   | 513   | 515   | 455   | 445   | 451   | 415   | 380   | 466    | Lyp1m7  |
| Lyp1m9    | 2907  | 3189  | 2300  | 3350  | 3695  | 3407  | 3696  | 1793  | 1814  | 1964  | 1665  | 1679  | 1416  | 1791  | 3112  | 2743  | 2928  | 3307  | 3178  | 3443  | 3674  | 2161  | 1654  | 1630  | 2149  | 1174  | 1613  | 1519   | Lyp1m9  |
| Lysmd1    | 529   | 556   | 546   | 684   | 813   | 810   | 832   | 548   | 602   | 530   | 539   | 530   | 521   | 566   | 580   | 569   | 687   | 660   | 841   | 730   | 844   | 610   | 577   | 644   | 680   | 548   | 475   | 533    | Lysmd1  |
| Lysmd2    | 107   | 101   | 150   | 136   | 246   | 156   | 160   | 375   | 497   | 467   | 545   | 277   | 332   | 292   | 121   | 129   | 137   | 132   | 190   | 124   | 149   | 363   | 462   | 378   | 377   | 385   | 351   | 354    | Lysmd2  |
| Lysmd3    | 5399  | 3911  | 4067  | 3948  | 3161  | 3872  | 3966  | 3485  | 2910  | 2306  | 2730  | 2773  | 2901  | 2722  | 5304  | 5362  | 3739  | 4036  | 3242  | 4530  | 3858  | 2822  | 3170  | 2435  | 2522  | 2621  | 2817  | 3021   | Lysmd3  |
| Lysmd4    | 1713  | 1913  | 1823  | 2070  | 2264  | 1988  | 2171  | 2251  | 2397  | 2328  | 2230  | 2086  | 1898  | 2162  | 1878  | 1763  | 1991  | 2099  | 2162  | 2075  | 2110  | 2261  | 2399  | 2215  | 2489  | 1793  | 2072  | 1983   | Lysmd4  |
| Lyst      | 4464  | 4546  | 1843  | 3165  | 3995  | 4659  | 4656  | 3593  | 3573  | 2481  | 2773  | 2225  | 2322  | 2349  | 4425  | 4180  | 2381  | 3344  | 2988  | 5399  | 4794  | 1970  | 3315  | 1800  | 2528  | 1318  | 2509  | 1818   | Lyst    |
| Lye1      | 295   | 275   | 421   | 261   | 340   | 359   | 248   | 468   | 596   | 535   | 684   | 477   | 761   | 550   | 359   | 315   | 315   | 306   | 267   | 436   | 285   | 560   | 1056  | 610   | 593   | 483   | 624   | 470    | Lye1    |
| Lyz1      | 3     | 5     | 3     | 1     | 3     | 2     | 6     | 0     | 2     | 0     | 5     | 0     | 1     | 5     | 7     | 5     | 9     | 7     | 5     | 7     | 4     | 3     | 1     | 0     | 5     | 1     | 5     | 5      | Lyz1    |
| Lyz2      | 270   | 280   | 264   | 265   | 284   | 323   | 257   | 375   | 465   | 322   | 655   | 320   | 359   | 328   | 295   | 426   | 178   | 340   | 197   | 288   | 276   | 379   | 909   | 377   | 436   | 370   | 338   | 392    | Lyz2    |
| Lyz14     | 3     | 3     | 2     | 1     | 4     | 2     | 1     | 0     | 2     | 5     | 4     | 1     | 1     | 0     | 1     | 0     | 0     | 4     | 0     | 1     | 3     | 5     | 5     | 7     | 0     | 1     | 0     | 1      | Lyz14   |
| Lyz16     | 0     | 0     | 0     | 0     | 0     | 0     | 1     | 0     | 1     | 0     | 0     | 0     | 0     | 0     | 0     | 0     | 0     | 0     | 1     | 0     | 1     | 2     | 0     | 0     | 0     | 0     | 0     | 0      | Lyz16   |
| Lzic      | 2201  | 2284  | 2340  | 2174  | 2009  | 1854  | 2107  | 2491  | 2507  | 2546  | 2468  | 2647  | 2537  | 2705  | 2040  | 1930  | 2161  | 2031  | 2122  | 2056  | 2025  | 2351  | 2537  | 2729  | 2549  | 2645  | 2585  | 2777   | Lzic    |
| Lztf11    | 7266  | 5807  | 4688  | 5577  | 5015  | 6069  | 6354  | 5969  | 5414  | 4379  | 5054  | 4485  | 4567  | 4630  | 7647  | 6822  | 5093  | 5567  | 4828  | 6896  | 6049  | 5116  | 5302  | 4195  | 4691  | 4136  | 4656  | 4574   | Lztf11  |
| Lztr1     | 5538  | 6386  | 5796  | 6275  | 6964  | 6568  | 6150  | 7668  | 8586  | 8777  | 8386  | 8276  | 8247  | 8071  | 5811  | 5841  | 6255  | 6268  | 6958  | 6382  | 6575  | 8590  | 8427  | 8526  | 8889  | 7730  | 8373  | 8218   | Lztr1   |
| Lzts1     | 2806  | 3544  | 3404  | 4154  | 4111  | 4039  | 4021  | 3577  | 3672  | 4136  | 3425  | 4651  | 3851  | 5036  | 3264  | 2730  | 3885  | 3933  | 4331  | 3521  | 4025  | 3492  | 3324  | 4707  | 5521  | 3738  | 4385  | 5029   | Lzts1   |
| Lzts2     | 2977  | 3680  | 4246  | 3225  | 3058  | 3126  | 2476  | 3263  | 3822  | 3856  | 4007  | 4503  | 4186  | 3795  | 2620  | 3307  | 3837  | 2952  | 3513  | 2713  | 2561  | 3489  | 3713  | 4264  | 3627  | 5019  | 4499  | 4087   | Lzts2   |
| Lzts3     | 2376  | 3144  | 3238  | 3748  | 3393  | 2934  | 3120  | 1353  | 1545  | 1881  | 1751  | 1546  | 1371  | 1505  | 2136  | 2646  | 3686  | 3859  | 3497  | 2765  | 3362  | 1975  | 1478  | 1816  | 1972  | 1681  | 1525  | 1510   | Lzts3   |
| M1ap      | 1     | 8     | 4     | 2     | 2     | 4     | 6     | 7     | 11    | 3     | 11    | 2     | 14    | 4     | 12    | 7     | 0     | 3     | 5     | 3     | 1     | 13    | 8     | 4     | 3     | 8     | 5     | 7      | M1ap    |
| M6pr      | 9401  | 9350  | 8902  | 7443  | 5897  | 6971  | 7015  | 5526  | 5436  | 4753  | 5116  | 5207  | 5289  | 5807  | 9312  | 9407  | 8006  | 7384  | 5919  | 7360  | 6506  | 4832  | 5572  | 5275  | 4674  | 6078  | 5426  | 6027   | M6pr    |
| Mab2111   | 1837  | 2492  | 3199  | 2895  | 3483  | 3251  | 1649  | 4979  | 4128  | 4619  | 3775  | 3905  | 5722  | 3841  | 2740  | 2419  | 3175  | 2386  | 3235  | 3130  | 2681  | 5817  | 4938  | 3903  | 4550  | 1552  | 4534  | 4550   | Mab2111 |
| Mab2112   | 2075  | 2063  | 3605  | 2638  | 5137  | 2600  | 1606  | 4146  | 4606  | 5923  | 5933  | 2699  | 6664  | 2782  | 2606  | 2146  | 3145  | 2345  | 2629  | 2105  | 2238  | 5778  | 4932  | 2676  | 2769  | 779   | 3271  | 3965   | Mab2112 |
| Mab2113   | 456   | 380   | 337   | 283   | 249   | 234   | 217   | 147   | 211   | 113   | 156   | 179   | 166   | 164   | 373   | 389   | 337   | 277   | 293   | 286   | 245   | 85    | 197   | 168   | 135   | 185   | 194   | 180    | Mab2113 |
| Mab2114   | 8     | 4     | 6     | 1     | 11    | 12    | 1     | 21    | 34    | 10    | 10    | 15    | 22    | 12    | 1     | 8     | 6     | 3     | 2     | 2     | 2     | 5     | 36    | 10    | 12    | 3     | 10    | 17     | Mab2114 |
| Macc1     | 212   | 55    | 31    | 35    | 36    | 41    | 19    | 241   | 233   | 190   | 163   | 62    | 125   | 70    | 123   | 113   | 16    | 51    | 12    | 20    | 21    | 67    | 242   | 141   | 265   | 146   | 73    | 81     | Macc1   |
| Macf1     | 33778 | 32302 | 17322 | 23459 | 29318 | 37941 | 32229 | 54362 | 52476 | 37981 | 42575 | 38572 | 38299 | 40854 | 34596 | 61326 | 19483 | 24922 | 25489 | 37701 | 38297 | 33652 | 48259 | 31022 | 42651 | 23050 | 47259 | 35198  | Macf1   |
| Macir     | 2603  | 2154  | 2708  | 3010  | 3165  | 2960  | 3741  | 4295  | 3337  | 3277  | 3143  | 3795  | 3009  | 4119  | 2794  | 1950  | 2876  | 2926  | 3388  | 3370  | 3499  | 3984  | 3254  | 3682  | 3931  | 4189  | 3948  | 4118   | Macir   |
| Macro1    | 8290  | 7233  | 7954  | 9302  | 10130 | 9677  | 10123 | 11623 | 10086 | 12056 | 11105 | 11593 | 10915 | 12108 | 8438  | 7449  | 8427  | 8899  | 9853  | 8550  | 9939  | 13774 | 10213 | 12015 | 13151 | 10584 | 10915 | 11357  | Macro1  |
| Macro21   | 221   | 229   | 195   | 232   | 211   | 200   | 173   | 93    | 146   | 159   | 195   | 99    | 119   | 117   | 189   | 220   | 238   | 231   | 215   | 195   | 199   | 139   | 201   | 136   | 146   | 176   | 100   | 102    | Macro21 |
| Macro22   | 2127  | 1945  | 2462  | 2588  | 2960  | 2806  | 3488  | 3835  | 2295  | 3042  | 2573  | 2880  | 2224  | 3465  | 2536  | 1878  | 2508  | 2691  | 2940  | 3602  | 3263  | 3982  | 3355  | 3097  | 3387  | 2951  | 3382  | 3650   | Macro22 |
| Macroh2a1 | 16909 | 19937 | 21537 | 18406 | 16442 | 15902 | 18948 | 14537 | 15473 | 16437 | 14956 | 20693 | 17932 | 21450 | 16072 | 16824 | 20286 |       |       |       |       |       |       |       |       |       |       |        |         |

|        |       |       |       |       |       |       |       |       |       |       |       |       |       |       |       |       |       |       |       |       |       |       |       |       |       |       |       |        |        |     |
|--------|-------|-------|-------|-------|-------|-------|-------|-------|-------|-------|-------|-------|-------|-------|-------|-------|-------|-------|-------|-------|-------|-------|-------|-------|-------|-------|-------|--------|--------|-----|
| Maged2 | 12712 | 14027 | 11375 | 10609 | 10951 | 12048 | 9917  | 14399 | 17859 | 13793 | 18571 | 13156 | 14743 | 12506 | 12444 | 13946 | 10843 | 11206 | 10516 | 11677 | 10043 | 13588 | 20510 | 13364 | 13268 | 14450 | 13643 | 12507  | Maged2 |     |
| Magee1 | 6081  | 6420  | 7733  | 8185  | 10679 | 8904  | 9341  | 7491  | 7504  | 8691  | 8021  | 7387  | 6857  | 7543  | 6419  | 5738  | 8876  | 8672  | 9802  | 8295  | 9427  | 11463 | 6963  | 8321  | 9798  | 6902  | 6248  | 7026   | Magee1 |     |
| Magee2 | 519   | 522   | 574   | 551   | 719   | 577   | 706   | 614   | 618   | 598   | 624   | 477   | 459   | 527   | 537   | 431   | 597   | 543   | 722   | 664   | 690   | 824   | 681   | 612   | 674   | 490   | 497   | 477    | Magee2 |     |
| Mageh1 | 3154  | 3642  | 3778  | 3818  | 4129  | 3631  | 4128  | 4643  | 4002  | 4445  | 3947  | 4733  | 4194  | 5024  | 3587  | 2862  | 4022  | 3715  | 4176  | 4437  | 4068  | 4246  | 4097  | 4586  | 4643  | 4576  | 4897  | 4843   | Mageh1 |     |
| Mageh2 | 3601  | 5218  | 3907  | 6624  | 5451  | 4583  | 6167  | 4600  | 4687  | 5655  | 5161  | 6188  | 3356  | 6189  | 3790  | 3468  | 5964  | 6490  | 5406  | 4640  | 5398  | 7768  | 4110  | 7142  | 6847  | 7258  | 5251  | 4875   | Mageh2 |     |
| Magi1  | 5451  | 5751  | 5773  | 6687  | 7860  | 7695  | 7244  | 12401 | 11962 | 13521 | 11496 | 14302 | 12611 | 14920 | 5658  | 5298  | 6230  | 6311  | 7236  | 7142  | 7607  | 13363 | 11240 | 13094 | 15323 | 10497 | 14299 | 13492  | Magi1  |     |
| Magi2  | 2232  | 2300  | 2316  | 3683  | 4416  | 3625  | 4237  | 3104  | 3029  | 4079  | 3261  | 3609  | 2693  | 3660  | 2618  | 2117  | 3186  | 3921  | 4121  | 3073  | 4313  | 4485  | 3034  | 3650  | 4216  | 2665  | 3095  | 3214   | Magi2  |     |
| Magi3  | 5801  | 5490  | 4710  | 6212  | 6437  | 6374  | 6555  | 4360  | 4116  | 4249  | 4442  | 3993  | 3862  | 4105  | 5896  | 5379  | 5390  | 6024  | 5811  | 6361  | 6767  | 4228  | 4286  | 3949  | 4202  | 3018  | 3693  | 3917   | Magi3  |     |
| Magix  | 2     | 2     | 10    | 1     | 8     | 4     | 6     | 6     | 10    | 6     | 10    | 10    | 9     | 11    | 5     | 8     | 5     | 4     | 12    | 6     | 4     | 5     | 5     | 5     | 9     | 5     | 5     | 9      | Magix  |     |
| Magoh  | 5146  | 5598  | 6563  | 5497  | 4223  | 4643  | 5716  | 4183  | 4116  | 4189  | 3891  | 5131  | 4549  | 5625  | 5246  | 5062  | 6849  | 4892  | 5543  | 6502  | 5717  | 3024  | 3901  | 4894  | 4126  | 6424  | 5505  | 6008   | Magoh  |     |
| Magohb | 562   | 475   | 648   | 682   | 550   | 589   | 696   | 818   | 714   | 857   | 845   | 971   | 797   | 1145  | 583   | 464   | 656   | 548   | 584   | 691   | 676   | 645   | 720   | 810   | 838   | 978   | 938   | 1050   | Magohb |     |
| Magt1  | 8359  | 6135  | 6854  | 5622  | 4492  | 5199  | 4974  | 5762  | 5901  | 5217  | 6552  | 4974  | 5850  | 5343  | 7640  | 8921  | 6178  | 5861  | 4453  | 4922  | 4790  | 5080  | 6637  | 5401  | 4490  | 5413  | 5333  | 5463   | Magt1  |     |
| Maip1  | 1528  | 1320  | 1546  | 1517  | 1479  | 1456  | 1659  | 1767  | 1624  | 1683  | 1568  | 1702  | 1714  | 1888  | 1568  | 1270  | 1539  | 1349  | 1448  | 1536  | 1624  | 1823  | 1706  | 1655  | 1717  | 1953  | 1730  | 1930   | Maip1  |     |
| Mak    | 1115  | 1108  | 770   | 930   | 907   | 975   | 1025  | 220   | 212   | 196   | 148   | 153   | 156   | 101   | 955   | 1002  | 913   | 908   | 868   | 1054  | 1150  | 175   | 240   | 139   | 117   | 98    | 124   | 93     | Mak    |     |
| Mak16  | 5259  | 5069  | 5082  | 4591  | 4093  | 4439  | 4941  | 4444  | 3835  | 3718  | 3480  | 4070  | 3855  | 4213  | 5470  | 4804  | 4682  | 4402  | 4228  | 5299  | 4548  | 3544  | 3593  | 3980  | 3739  | 4692  | 4094  | 4402   | Mak16  |     |
| Mal    | 55    | 44    | 42    | 46    | 79    | 68    | 47    | 151   | 126   | 161   | 118   | 88    | 86    | 96    | 67    | 54    | 42    | 80    | 48    | 60    | 44    | 83    | 187   | 318   | 176   | 96    | 182   | 41     | 28     | Mal |
| Mal2   | 323   | 125   | 72    | 125   | 156   | 103   | 74    | 283   | 265   | 319   | 196   | 47    | 70    | 36    | 199   | 194   | 48    | 109   | 76    | 44    | 83    | 187   | 318   | 176   | 96    | 182   | 41    | 28     | Mal2   |     |
| Mall   | 57    | 38    | 62    | 66    | 35    | 60    | 41    | 93    | 125   | 100   | 122   | 73    | 91    | 68    | 54    | 63    | 43    | 42    | 46    | 33    | 31    | 75    | 169   | 109   | 61    | 100   | 71    | 68     | Mall   |     |
| Malrd1 | 10    | 9     | 10    | 7     | 11    | 9     | 7     | 5     | 15    | 8     | 14    | 4     | 7     | 10    | 17    | 19    | 0     | 11    | 8     | 1     | 13    | 8     | 13    | 10    | 7     | 5     | 10    | 13     | Malrd1 |     |
| Malsu1 | 1088  | 1056  | 962   | 1027  | 934   | 964   | 1104  | 1098  | 943   | 955   | 776   | 968   | 826   | 1022  | 1280  | 960   | 964   | 820   | 1007  | 1139  | 1087  | 854   | 865   | 958   | 910   | 1080  | 999   | 979    | Malsu1 |     |
| Malt1  | 2998  | 2194  | 1839  | 2004  | 1659  | 1850  | 1808  | 1004  | 1120  | 915   | 1216  | 731   | 961   | 778   | 2462  | 2736  | 1907  | 1913  | 1659  | 1814  | 1958  | 825   | 1095  | 749   | 666   | 843   | 891   | 746    | Malt1  |     |
| Mamdc2 | 114   | 124   | 165   | 80    | 121   | 104   | 87    | 231   | 182   | 140   | 282   | 247   | 248   | 202   | 148   | 122   | 112   | 86    | 84    | 118   | 95    | 239   | 339   | 218   | 197   | 210   | 223   | 178    | Mamdc2 |     |
| Mamdc4 | 458   | 646   | 778   | 843   | 677   | 696   | 611   | 876   | 873   | 1094  | 1139  | 1235  | 1098  | 967   | 541   | 649   | 876   | 647   | 764   | 619   | 612   | 1039  | 823   | 1131  | 1080  | 1033  | 1135  | 1104   | Mamdc4 |     |
| Mami1  | 2480  | 2407  | 2870  | 2453  | 2459  | 2442  | 1991  | 2884  | 3321  | 3479  | 3525  | 4361  | 4063  | 3827  | 2308  | 2439  | 2856  | 2489  | 2627  | 1854  | 2132  | 3603  | 3246  | 3956  | 3569  | 4345  | 3624  | 3882   | Mami1  |     |
| Mami2  | 1712  | 1413  | 1525  | 1620  | 1537  | 1737  | 1402  | 1890  | 1850  | 1877  | 2002  | 1925  | 2353  | 2006  | 1464  | 1515  | 1528  | 1469  | 1464  | 1467  | 1480  | 2018  | 2018  | 1832  | 1747  | 1881  | 2116  | 2034   | Mami2  |     |
| Mami3  | 2545  | 2939  | 2976  | 3060  | 3023  | 2812  | 2547  | 2131  | 2082  | 2675  | 2246  | 2749  | 2777  | 2651  | 2408  | 2955  | 2975  | 2807  | 2993  | 2578  | 2802  | 2807  | 2015  | 2545  | 2488  | 2318  | 2703  | 2696   | Mami3  |     |
| Mamld1 | 1564  | 1724  | 1759  | 1848  | 2292  | 2172  | 2131  | 1432  | 1441  | 1718  | 1508  | 2155  | 1676  | 2006  | 1619  | 1509  | 1788  | 1844  | 2280  | 1822  | 2063  | 1801  | 1309  | 1803  | 1887  | 2311  | 1775  | 1914   | Mamld1 |     |
| Mamstr | 170   | 164   | 183   | 223   | 186   | 157   | 178   | 145   | 225   | 216   | 465   | 159   | 205   | 193   | 127   | 181   | 229   | 206   | 136   | 129   | 174   | 216   | 358   | 239   | 230   | 185   | 141   | 173    | Mamstr |     |
| Man1a  | 1828  | 1509  | 1359  | 1473  | 1520  | 1609  | 1391  | 1078  | 1509  | 1173  | 1808  | 711   | 1216  | 656   | 1811  | 2174  | 1307  | 1826  | 1253  | 1352  | 1496  | 1325  | 1713  | 939   | 996   | 835   | 682   | 727    | Man1a  |     |
| Man1a2 | 10156 | 8332  | 7346  | 7454  | 7715  | 8758  | 8094  | 8658  | 8513  | 7557  | 8315  | 7896  | 8344  | 7870  | 9803  | 9657  | 6840  | 8037  | 6876  | 8260  | 8091  | 8111  | 8835  | 6980  | 7309  | 6539  | 8034  | 7980   | Man1a2 |     |
| Man1b1 | 9574  | 11073 | 10069 | 9886  | 8552  | 8775  | 8276  | 8620  | 8181  | 9230  | 9297  | 10411 | 11811 | 9230  | 9256  | 10125 | 10026 | 10031 | 9619  | 8515  | 8971  | 8118  | 8939  | 9872  | 9817  | 10557 | 10105 | 10313  | Man1b1 |     |
| Man1c1 | 2284  | 2823  | 3516  | 2906  | 2746  | 2398  | 2249  | 891   | 1184  | 1262  | 1389  | 1340  | 1330  | 1194  | 2413  | 2950  | 3457  | 3073  | 2657  | 1979  | 2459  | 1384  | 1458  | 1297  | 1232  | 1501  | 1319  | 1220   | Man1c1 |     |
| Man2a1 | 5116  | 3748  | 4233  | 4116  | 4239  | 5132  | 3898  | 3980  | 4445  | 4475  | 5703  | 4322  | 4024  | 4680  | 4981  | 3772  | 5081  | 3525  | 3624  | 3994  | 4284  | 4592  | 4159  | 4144  | 2988  | 4143  | 3739  | Man2a1 |        |     |
| Man2a2 | 7472  | 7797  | 7819  | 9052  | 10158 | 9357  | 8819  | 6537  | 7772  | 9291  | 8819  | 8526  | 8121  | 7297  | 6748  | 7518  | 8719  | 9452  | 9709  | 7312  | 9124  | 8607  | 7067  | 8550  | 8833  | 6325  | 7709  | 7620   | Man2a2 |     |
| Man2b1 | 3956  | 4575  | 4605  | 4521  | 3883  | 3768  | 3576  | 1984  | 2534  | 2443  | 2788  | 2383  | 2730  | 2206  | 3608  | 4790  | 4281  | 4552  | 3741  | 3218  | 3595  | 2597  | 2652  | 2526  | 2371  | 2615  | 2503  | 2353   | Man2b1 |     |
| Man2b2 | 711   | 985   | 850   | 648   | 736   | 724   | 419   | 823   | 1066  | 986   | 945   | 1023  | 1117  | 880   | 687   | 954   | 807   | 739   | 659   | 589   | 471   | 1044  | 1212  | 863   | 823   | 1078  | 1140  | 866    | Man2b2 |     |
| Man2c1 | 2850  | 3491  | 3084  | 3632  | 3634  | 3340  | 3073  | 3826  | 4594  | 4783  | 4732  | 4659  | 4495  | 4437  | 2848  | 3028  | 3139  | 3628  | 3525  | 3195  | 3357  | 4861  | 4402  | 4654  | 4889  | 4474  | 4422  | 4400   | Man2c1 |     |
| Manba  | 1103  | 1170  | 862   | 857   | 946   | 729   | 873   | 462   | 513   | 571   | 540   | 434   | 500   | 380   | 1092  | 1167  | 840   | 979   | 958   | 992   | 911   | 483   | 664   | 391   | 388   | 484   | 485   | 409    | Manba  |     |
| Manbal | 1160  | 1332  | 1391  | 1297  | 1268  | 1366  | 1279  | 1688  | 1810  | 2062  | 1948  | 2054  | 1839  | 2055  | 1155  | 1122  | 1358  | 1246  | 1431  | 1209  | 1448  | 1639  | 1935  | 2116  | 2178  | 2379  | 1995  | 2040   | Manbal |     |
| Manea  | 3989  | 2773  | 3378  | 3454  | 3714  | 3664  | 3749  | 3613  | 2962  | 2734  | 2891  | 3521  | 3453  | 3202  | 4026  | 3513  | 3452  | 3129  | 3433  | 3592  | 3579  | 3474  | 3313  | 2663  | 2995  | 3098  | 3511  | 3398   | Manea  |     |
| Maneal | 1340  | 1574  | 1732  | 1658  | 2231  | 1912  | 2073  | 1905  | 1792  | 2142  | 1776  | 2179  | 1821  | 2131  | 1424  | 1185  | 1825  | 1692  | 2208  | 1801  | 2052  | 2453  | 1628  | 2103  | 2253  | 1848  | 1951  | 2072   | Maneal |     |
| Manf   | 7609  | 8192  | 9335  | 8557  | 6345  | 6018  | 7538  | 4993  | 4593  | 5249  | 5440  | 4566  | 4873  | 5403  | 7953  | 7346  | 8489  | 7908  | 7268  | 7331  | 7253  | 4360  | 4671  | 5880  | 5164  | 5429  | 5435  | 5645   | Manf   |     |
| Mansc1 | 51    | 53    | 57    | 45    | 74    | 69    | 73    | 79    | 113   | 79    | 105   | 105   | 86    | 67    | 62    | 80    | 65    | 79    | 65    | 49    | 61    | 75    | 106   | 76    | 78    | 89    | 83    | 81     | Mansc1 |     |
| Mansc4 | 15    | 10    | 9     | 14    | 11    | 5     | 3     | 3     | 17    | 15    | 38    | 23    | 14    | 15    | 7     | 11    | 3     | 8     | 12    | 0     | 4     | 8     | 27    | 14    | 16    | 12    | 13    | 14     | Mansc4 |     |
| Maoa   | 5822  | 4177  | 4404  | 4010  | 4290  | 4015  | 4364  | 3960  | 3686  | 3073  | 3265  | 2910  | 3035  | 3003  | 5641  | 4866  | 3911  | 4371  | 3596  | 4710  | 4051  | 3190  | 4100  | 2988  | 2842  | 3201  | 2897  | 3128   | Maoa   |     |
| Maob   | 608   | 362   | 217   | 337   | 95    | 171   | 77    | 518   | 499   | 571   | 381   | 177   | 354   | 284   | 448   | 482   | 214   | 161   | 124   | 123   | 99    | 175   | 537   | 556   | 195   | 739   | 228   | 250    | Maob   |     |
| Map10  | 1110  | 1071  | 1249  | 1118  | 1117  | 1123  | 1244  | 717   | 878   | 728   | 839   | 897   | 886   | 840   | 1213  | 1012  | 1093  | 1128  | 1137  | 1087  | 1134  | 769   | 819   | 856   | 778   | 812   | 865   | 819    | Map10  |     |
| Map1a  | 8630  | 11594 | 12230 | 16338 | 16332 | 14777 | 13415 | 5565  | 6629  | 8769  | 8409  | 10665 | 7997  | 9623  | 9531  | 10690 | 15688 | 166   |       |       |       |       |       |       |       |       |       |        |        |     |

|          |       |       |       |       |       |       |       |       |       |       |       |       |       |       |       |       |       |       |       |       |       |       |       |       |       |       |       |         |          |        |
|----------|-------|-------|-------|-------|-------|-------|-------|-------|-------|-------|-------|-------|-------|-------|-------|-------|-------|-------|-------|-------|-------|-------|-------|-------|-------|-------|-------|---------|----------|--------|
| Map4     | 22942 | 25004 | 24775 | 27199 | 30035 | 27918 | 26021 | 21159 | 23487 | 26222 | 26190 | 24637 | 24619 | 23258 | 24100 | 24649 | 26501 | 28773 | 29184 | 21412 | 26504 | 28642 | 23407 | 23623 | 26457 | 20551 | 22887 | 22528   | Map4     |        |
| Map4k1   | 228   | 285   | 346   | 270   | 277   | 269   | 277   | 283   | 312   | 319   | 377   | 413   | 387   | 394   | 225   | 277   | 327   | 248   | 252   | 251   | 223   | 259   | 332   | 336   | 325   | 456   | 381   | 368     | Map4k1   |        |
| Map4k2   | 0     | 1     | 0     | 0     | 1     | 2     | 0     | 0     | 1     | 3     | 0     | 0     | 0     | 0     | 0     | 1     | 0     | 0     | 0     | 1     | 0     | 0     | 0     | 0     | 0     | 0     | 0     | 0       | 0        | Map4k2 |
| Map4k3   | 6688  | 5180  | 5140  | 6001  | 6828  | 7152  | 7139  | 8639  | 8115  | 7708  | 7445  | 7656  | 7143  | 7845  | 6744  | 5831  | 5423  | 6545  | 6803  | 6332  | 6917  | 8169  | 8042  | 7670  | 7996  | 7219  | 7184  | 7514    | Map4k3   |        |
| Map4k4   | 25906 | 26673 | 27868 | 29325 | 32499 | 30431 | 30855 | 45250 | 43797 | 49493 | 45114 | 52384 | 45914 | 54171 | 25582 | 25020 | 29713 | 28563 | 32521 | 28464 | 31603 | 48127 | 39667 | 51023 | 55330 | 41993 | 49023 | 50409   | Map4k4   |        |
| Map4k5   | 5777  | 4435  | 4431  | 4427  | 6024  | 5611  | 5858  | 7102  | 6733  | 5795  | 6783  | 5647  | 5838  | 5807  | 5884  | 5344  | 4501  | 4949  | 4994  | 5898  | 5673  | 6388  | 7000  | 5903  | 6136  | 5591  | 5653  | 5473    | Map4k5   |        |
| Map6     | 7500  | 9253  | 10871 | 15649 | 19871 | 15201 | 14977 | 11430 | 10485 | 15863 | 12758 | 13071 | 11796 | 11889 | 9366  | 8203  | 14473 | 16353 | 18181 | 12980 | 16655 | 19704 | 9688  | 14083 | 17376 | 9348  | 11212 | 11405   | Map6     |        |
| Map6d1   | 125   | 133   | 114   | 81    | 192   | 146   | 115   | 173   | 126   | 144   | 148   | 99    | 116   | 100   | 119   | 93    | 115   | 143   | 205   | 122   | 136   | 149   | 115   | 106   | 149   | 78    | 120   | 81      | Map6d1   |        |
| Map7     | 830   | 684   | 928   | 701   | 976   | 717   | 757   | 861   | 1121  | 844   | 801   | 739   | 836   | 661   | 847   | 833   | 869   | 752   | 718   | 785   | 692   | 861   | 956   | 721   | 695   | 847   | 707   | 724     | Map7     |        |
| Map7d1   | 9568  | 13295 | 16486 | 16367 | 17876 | 14764 | 11432 | 10555 | 11680 | 16441 | 14598 | 15864 | 13613 | 13606 | 9939  | 11588 | 18068 | 16143 | 17615 | 11812 | 13403 | 16157 | 11451 | 16232 | 16780 | 15996 | 13508 | 13287   | Map7d1   |        |
| Map7d2   | 2705  | 2705  | 3693  | 3920  | 4672  | 4058  | 4280  | 2451  | 1812  | 2371  | 2004  | 2027  | 2184  | 2143  | 3443  | 2622  | 3780  | 3873  | 4263  | 4089  | 4096  | 2871  | 1790  | 2168  | 2428  | 1629  | 2192  | 2231    | Map7d2   |        |
| Map7d3   | 742   | 671   | 728   | 443   | 403   | 539   | 420   | 234   | 240   | 173   | 260   | 249   | 362   | 283   | 856   | 694   | 542   | 442   | 401   | 541   | 413   | 199   | 272   | 176   | 214   | 248   | 315   | 282     | Map7d3   |        |
| Map9     | 5655  | 5265  | 3577  | 6730  | 7708  | 7539  | 8995  | 7331  | 6471  | 6411  | 5267  | 5123  | 3703  | 5493  | 6436  | 4718  | 5016  | 7035  | 7136  | 8760  | 8577  | 7334  | 6094  | 5570  | 7722  | 3524  | 4499  | 4516    | Map9     |        |
| Mapk1    | 25620 | 22715 | 22081 | 23897 | 22949 | 23454 | 25871 | 19712 | 17252 | 16951 | 16635 | 18634 | 17775 | 18601 | 25938 | 22123 | 23244 | 24375 | 23170 | 22525 | 24965 | 19727 | 17259 | 16878 | 18590 | 18379 | 18503 | 19130   | Mapk1    |        |
| Mapk10   | 4252  | 4989  | 4344  | 6286  | 8004  | 7310  | 6809  | 7619  | 5879  | 7423  | 5645  | 6521  | 6872  | 6455  | 5955  | 4375  | 5826  | 6546  | 7226  | 7607  | 7669  | 9125  | 5811  | 6565  | 8387  | 4442  | 6603  | 6234    | Mapk10   |        |
| Mapk11   | 2450  | 2717  | 3696  | 3306  | 3535  | 3136  | 3366  | 3283  | 3244  | 4048  | 3307  | 5082  | 4233  | 4816  | 2532  | 2281  | 3846  | 3112  | 3854  | 2933  | 3329  | 4342  | 2836  | 4747  | 4558  | 4727  | 4947  | 4640    | Mapk11   |        |
| Mapk12   | 2021  | 2179  | 2710  | 1963  | 1714  | 1778  | 1759  | 1082  | 851   | 967   | 797   | 1460  | 1276  | 1382  | 1965  | 1906  | 2415  | 1683  | 1998  | 1873  | 1628  | 882   | 810   | 1144  | 1106  | 1490  | 1535  | 1575    | Mapk12   |        |
| Mapk13   | 414   | 187   | 113   | 176   | 72    | 115   | 30    | 219   | 310   | 288   | 278   | 62    | 127   | 80    | 219   | 293   | 65    | 119   | 62    | 43    | 36    | 52    | 285   | 258   | 38    | 253   | 38    | 62      | Mapk13   |        |
| Mapk14   | 9330  | 9264  | 8690  | 8498  | 7869  | 8257  | 8252  | 5560  | 5523  | 5209  | 5514  | 5888  | 5571  | 5436  | 8337  | 9404  | 8856  | 8357  | 8191  | 7598  | 8166  | 5243  | 5317  | 5561  | 5419  | 5884  | 5764  | 5655    | Mapk14   |        |
| Mapk15   | 566   | 680   | 805   | 696   | 506   | 488   | 491   | 148   | 200   | 218   | 166   | 216   | 243   | 165   | 498   | 684   | 708   | 548   | 588   | 507   | 420   | 177   | 240   | 217   | 158   | 247   | 188   | 186     | Mapk15   |        |
| Mapk1p1  | 1008  | 1398  | 1123  | 1457  | 1615  | 1352  | 1406  | 1545  | 1631  | 1885  | 1774  | 1483  | 1524  | 1562  | 1063  | 1191  | 1424  | 1549  | 1432  | 1301  | 1432  | 1818  | 1603  | 1781  | 1844  | 1407  | 1485  | 1385    | Mapk1p1  |        |
| Mapk1p11 | 8779  | 7525  | 11315 | 9761  | 9809  | 9607  | 10107 | 9355  | 10059 | 11551 | 11434 | 13805 | 12920 | 13382 | 7928  | 8111  | 10306 | 9630  | 10524 | 8446  | 9288  | 10596 | 9917  | 12394 | 12056 | 14318 | 13316 | 13513   | Mapk1p11 |        |
| Mapk3    | 3637  | 4533  | 3824  | 4071  | 4664  | 4140  | 4248  | 4236  | 4785  | 4751  | 4252  | 4313  | 4098  | 4156  | 3620  | 3694  | 4164  | 4034  | 4625  | 4027  | 4214  | 4846  | 5064  | 4484  | 4704  | 4232  | 3940  | 3823    | Mapk3    |        |
| Mapk4    | 1014  | 1146  | 1409  | 1462  | 1765  | 1477  | 1396  | 1178  | 1257  | 1458  | 1210  | 1669  | 1461  | 1604  | 1143  | 1206  | 1501  | 1433  | 1548  | 1277  | 1407  | 1693  | 1296  | 1421  | 1555  | 1544  | 1352  | 1410    | Mapk4    |        |
| Mapk6    | 14164 | 13879 | 13480 | 13181 | 14613 | 14344 | 14475 | 20727 | 17495 | 17739 | 15619 | 21794 | 20222 | 21715 | 15096 | 12774 | 14054 | 12835 | 14027 | 15010 | 14126 | 21016 | 16543 | 18156 | 19776 | 20318 | 23007 | 21975   | Mapk6    |        |
| Mapk7    | 4402  | 5553  | 5868  | 6312  | 5698  | 5289  | 5006  | 3953  | 4668  | 5429  | 5010  | 6461  | 5131  | 5349  | 4096  | 4900  | 6301  | 6117  | 6223  | 4299  | 4909  | 5289  | 4457  | 5857  | 5464  | 6569  | 5166  | 5222    | Mapk7    |        |
| Mapk8    | 10716 | 9709  | 7844  | 10612 | 13146 | 12625 | 14171 | 18447 | 14292 | 12735 | 11948 | 12230 | 11650 | 12709 | 12808 | 9898  | 9575  | 11285 | 12460 | 15527 | 13861 | 15984 | 14013 | 11941 | 14559 | 10251 | 11739 | 11725   | Mapk8    |        |
| Mapk8p1  | 10493 | 14255 | 14323 | 16101 | 15586 | 13321 | 13860 | 8361  | 8885  | 10732 | 10019 | 10187 | 9754  | 9950  | 11044 | 11562 | 16005 | 15106 | 17121 | 12936 | 15451 | 11010 | 9156  | 10623 | 11492 | 10251 | 9408  | 10240   | Mapk8p1  |        |
| Mapk8p2  | 4450  | 5630  | 6969  | 7526  | 9468  | 7244  | 7508  | 7083  | 6970  | 9706  | 7558  | 8967  | 7562  | 8820  | 4688  | 4273  | 7900  | 7684  | 9742  | 6451  | 8386  | 10769 | 6336  | 9211  | 10587 | 7650  | 7831  | 8388    | Mapk8p2  |        |
| Mapk8p3  | 14229 | 18652 | 16716 | 21141 | 20163 | 18529 | 18239 | 12469 | 15109 | 16481 | 15744 | 16058 | 14382 | 14655 | 14458 | 17612 | 19491 | 21578 | 20878 | 15913 | 19066 | 16753 | 13790 | 15685 | 17662 | 11977 | 14120 | 13699   | Mapk8p3  |        |
| Mapk9    | 13029 | 12207 | 10002 | 13812 | 14676 | 14920 | 14507 | 8856  | 8030  | 8773  | 8269  | 7545  | 7787  | 7647  | 13557 | 12985 | 11564 | 14311 | 13097 | 14346 | 15179 | 9095  | 7956  | 6753  | 8428  | 5858  | 7509  | 7209    | Mapk9    |        |
| Mapkap1  | 6102  | 6810  | 6533  | 6067  | 5563  | 5426  | 5594  | 5326  | 5380  | 5396  | 4917  | 5946  | 5548  | 5660  | 5989  | 5087  | 6488  | 5931  | 5672  | 5665  | 5550  | 5110  | 5262  | 5560  | 5448  | 6076  | 5914  | 5886    | Mapkap1  |        |
| Mapkap2  | 10809 | 11756 | 12350 | 10843 | 8523  | 9670  | 8536  | 6288  | 6470  | 6073  | 6145  | 7623  | 8259  | 10214 | 10547 | 11300 | 9894  | 10149 | 8715  | 9217  | 6117  | 6524  | 7342  | 6574  | 8950  | 8671  | 8651  | Mapkap2 |          |        |
| Mapkap3  | 1466  | 1410  | 1303  | 1036  | 666   | 805   | 759   | 231   | 280   | 266   | 292   | 252   | 365   | 238   | 1185  | 1413  | 1060  | 1029  | 765   | 748   | 686   | 212   | 368   | 265   | 189   | 291   | 259   | 233     | Mapkap3  |        |
| Mapkap5  | 130   | 97    | 119   | 198   | 142   | 124   | 112   | 153   | 132   | 153   | 118   | 156   | 118   | 144   | 96    | 94    | 159   | 127   | 138   | 103   | 105   | 137   | 122   | 150   | 166   | 145   | 120   | 154     | Mapkap5  |        |
| Mapkbp1  | 4563  | 5471  | 5019  | 6194  | 6677  | 6296  | 6032  | 3841  | 4565  | 5058  | 4757  | 5194  | 4913  | 4769  | 4485  | 5057  | 5894  | 6385  | 6617  | 5281  | 6338  | 5496  | 4443  | 4994  | 5413  | 3395  | 4645  | 4593    | Mapkbp1  |        |
| Mapre1   | 20179 | 17517 | 19335 | 19548 | 21624 | 21230 | 23525 | 28722 | 24597 | 25250 | 24654 | 28379 | 26578 | 29959 | 21664 | 17178 | 19335 | 19026 | 20821 | 22726 | 22515 | 27315 | 24699 | 25647 | 28031 | 27388 | 28217 | 29110   | Mapre1   |        |
| Mapre2   | 14782 | 15505 | 14910 | 17935 | 20423 | 18019 | 18154 | 12075 | 12153 | 14347 | 12949 | 12041 | 13354 | 11947 | 17037 | 16080 | 16822 | 18843 | 17238 | 17180 | 18506 | 17029 | 12209 | 12245 | 14457 | 9923  | 11102 | 11763   | Mapre2   |        |
| Mapre3   | 3744  | 4571  | 4447  | 6876  | 7193  | 6410  | 6293  | 3422  | 3680  | 5063  | 4541  | 4224  | 3787  | 4361  | 3853  | 3991  | 5924  | 6971  | 7015  | 5384  | 6808  | 5207  | 3531  | 4923  | 5516  | 3491  | 3688  | 4081    | Mapre3   |        |
| Maprt    | 14829 | 18236 | 17096 | 35550 | 56637 | 41259 | 41607 | 35367 | 38257 | 49991 | 40951 | 28268 | 29011 | 27951 | 19810 | 17552 | 27403 | 42247 | 46331 | 37410 | 46151 | 62337 | 34995 | 37087 | 54611 | 18397 | 22791 | 23468   | Maprt    |        |
| Marchf1  | 668   | 790   | 703   | 1413  | 2016  | 1698  | 1522  | 1893  | 1598  | 1628  | 1283  | 1123  | 1412  | 1087  | 1139  | 872   | 1014  | 1465  | 1531  | 2024  | 1634  | 2400  | 1647  | 1093  | 1737  | 524   | 1026  | 1100    | Marchf1  |        |
| Marchf10 | 17    | 17    | 2     | 16    | 13    | 18    | 15    | 7     | 16    | 14    | 11    | 15    | 15    | 6     | 7     | 17    | 19    | 17    | 22    | 12    | 17    | 5     | 17    | 11    | 20    | 12    | 23    | 2       | Marchf10 |        |
| Marchf11 | 50    | 66    | 61    | 98    | 187   | 104   | 108   | 164   | 161   | 175   | 149   | 88    | 100   | 78    | 74    | 71    | 90    | 98    | 147   | 133   | 108   | 269   | 166   | 123   | 151   | 98    | 74    | 85      | Marchf11 |        |
| Marchf2  | 4026  | 4547  | 3147  | 3904  | 3922  | 4089  | 4022  | 1896  | 2102  | 1738  | 1913  | 1826  | 2110  | 1833  | 4158  | 3914  | 3482  | 3973  | 3719  | 4299  | 4236  | 1781  | 2108  | 1687  | 1995  | 1490  | 1951  | 1925    | Marchf2  |        |
| Marchf3  | 308   | 494   | 333   | 429   | 408   | 338   | 296   | 161   | 217   | 174   | 166   | 147   | 229   | 153   | 411   | 467   | 362   | 375   | 298   | 415   | 353   | 187   | 291   | 118   | 164   | 135   | 180   | 246     | Marchf3  |        |
| Marchf4  | 187   | 247   | 257   | 565   | 1325  | 793   | 658   | 949   | 1179  | 1396  | 1192  | 502   | 641   |       |       |       |       |       |       |       |       |       |       |       |       |       |       |         |          |        |

|        |       |       |       |       |       |       |       |       |       |       |       |       |       |       |       |       |       |       |       |       |       |       |       |       |       |       |       |       |        |
|--------|-------|-------|-------|-------|-------|-------|-------|-------|-------|-------|-------|-------|-------|-------|-------|-------|-------|-------|-------|-------|-------|-------|-------|-------|-------|-------|-------|-------|--------|
| Matn3  | 110   | 104   | 109   | 71    | 33    | 65    | 40    | 50    | 215   | 197   | 801   | 23    | 58    | 33    | 109   | 147   | 61    | 65    | 56    | 41    | 26    | 252   | 190   | 82    | 142   | 56    | 43    | 63    | Matn3  |
| Matn4  | 316   | 402   | 141   | 744   | 280   | 1268  | 4     | 1122  | 3930  | 4586  | 6898  | 722   | 1227  | 575   | 407   | 534   | 363   | 1532  | 394   | 7     | 3     | 5681  | 3164  | 2696  | 3215  | 870   | 933   | 508   | Matn4  |
| Matr3  | 21607 | 14169 | 19500 | 20001 | 21413 | 20749 | 27064 | 32145 | 24713 | 23851 | 22695 | 26373 | 23626 | 29896 | 24976 | 18010 | 20179 | 19815 | 21121 | 24780 | 25673 | 29085 | 24755 | 26580 | 26592 | 27585 | 25293 | 28736 | Matr3  |
| Mau2   | 9109  | 9497  | 5456  | 8560  | 8859  | 9572  | 8765  | 11352 | 11127 | 10465 | 10270 | 10657 | 10218 | 10284 | 8962  | 8346  | 6675  | 8470  | 8952  | 9212  | 10587 | 10723 | 10187 | 9256  | 11570 | 7054  | 10779 | 9930  | Mau2   |
| Mavs   | 1954  | 2244  | 1625  | 1579  | 1122  | 1344  | 1088  | 982   | 1107  | 864   | 980   | 956   | 1008  | 847   | 1751  | 2035  | 1556  | 1438  | 1180  | 1460  | 1046  | 780   | 1113  | 935   | 713   | 1004  | 1088  | 979   | Mavs   |
| Max    | 5873  | 6886  | 7236  | 7530  | 6473  | 6488  | 7042  | 3754  | 3704  | 4023  | 3868  | 4069  | 3708  | 4303  | 6028  | 6153  | 7105  | 6999  | 6759  | 6238  | 6977  | 3877  | 3721  | 4310  | 4374  | 4641  | 4038  | 4379  | Max    |
| Maz    | 9982  | 11213 | 13530 | 13380 | 13463 | 12038 | 12207 | 17397 | 17932 | 22852 | 19721 | 25632 | 19689 | 23572 | 9473  | 8572  | 14568 | 12043 | 14480 | 10754 | 13247 | 20317 | 16111 | 24995 | 22429 | 28238 | 21487 | 23985 | Maz    |
| Mb     | 13    | 14    | 3     | 14    | 8     | 5     | 4     | 11    | 30    | 10    | 97    | 3     | 2     | 3     | 12    | 17    | 13    | 14    | 8     | 7     | 4     | 23    | 97    | 20    | 1     | 8     | 5     | 2     | Mb     |
| Mb21d2 | 1474  | 1445  | 1664  | 1739  | 2513  | 1831  | 1882  | 2553  | 2425  | 2515  | 2215  | 1993  | 2146  | 1860  | 1663  | 1494  | 1859  | 1738  | 2279  | 1961  | 1989  | 3193  | 2466  | 1998  | 2393  | 2065  | 1970  | 1930  | Mb21d2 |
| Mbd1   | 6683  | 6893  | 6755  | 7111  | 6352  | 6531  | 6415  | 5543  | 5962  | 6017  | 5820  | 6156  | 6254  | 6122  | 6000  | 6263  | 6573  | 6803  | 6597  | 6193  | 6284  | 5822  | 5352  | 6190  | 6482  | 5710  | 6365  | 6080  | Mbd1   |
| Mbd2   | 3109  | 3049  | 3292  | 3042  | 2632  | 2496  | 2603  | 2276  | 2200  | 2170  | 2264  | 2131  | 2228  | 2166  | 2917  | 3041  | 3065  | 2497  | 2573  | 2394  | 2693  | 2211  | 2409  | 2312  | 1911  | 2565  | 2258  | 2483  | Mbd2   |
| Mbd3   | 3528  | 4448  | 5075  | 4257  | 4178  | 4021  | 3475  | 6160  | 7442  | 8426  | 8270  | 10354 | 8489  | 9060  | 3058  | 3565  | 5038  | 4021  | 5178  | 3485  | 3918  | 7005  | 7368  | 9765  | 8766  | 12283 | 9645  | 9301  | Mbd3   |
| Mbd3l1 | 0     | 0     | 0     | 0     | 0     | 0     | 0     | 0     | 0     | 0     | 0     | 2     | 0     | 2     | 0     | 0     | 0     | 0     | 0     | 0     | 0     | 0     | 0     | 0     | 0     | 0     | 0     | 0     | Mbd3l1 |
| Mbd3l2 | 0     | 0     | 0     | 2     | 0     | 0     | 0     | 0     | 0     | 0     | 0     | 0     | 0     | 0     | 0     | 0     | 0     | 0     | 0     | 0     | 1     | 0     | 0     | 0     | 0     | 0     | 0     | 0     | Mbd3l2 |
| Mbd4   | 3494  | 3239  | 2842  | 2938  | 2535  | 2825  | 2813  | 2307  | 2127  | 2124  | 2172  | 2434  | 2237  | 2564  | 3186  | 3142  | 2688  | 2747  | 2627  | 3035  | 2799  | 1860  | 1959  | 2134  | 2028  | 2128  | 2656  | 2480  | Mbd4   |
| Mbd5   | 3767  | 3343  | 2315  | 3333  | 3692  | 3771  | 3723  | 4107  | 3707  | 3396  | 3482  | 3414  | 3246  | 3396  | 3746  | 3395  | 2917  | 3371  | 3543  | 3772  | 4084  | 3907  | 3335  | 2920  | 3524  | 2210  | 3460  | 3101  | Mbd5   |
| Mbd6   | 3727  | 4945  | 6410  | 6696  | 6649  | 5566  | 5656  | 4246  | 4934  | 6573  | 5848  | 7089  | 5940  | 6519  | 3698  | 4311  | 6898  | 6128  | 7003  | 4472  | 5805  | 6413  | 4497  | 7229  | 6796  | 7954  | 6415  | 6149  | Mbd6   |
| Mbp    | 2645  | 2021  | 1778  | 2044  | 2059  | 2308  | 2758  | 2762  | 2551  | 2285  | 2242  | 2858  | 1936  | 2962  | 2459  | 1856  | 2188  | 1991  | 2128  | 2711  | 2597  | 2511  | 2136  | 2462  | 2482  | 3249  | 2578  | 2541  | Mbp    |
| Mbl1   | 0     | 0     | 0     | 0     | 0     | 0     | 0     | 1     | 0     | 0     | 0     | 0     | 0     | 0     | 0     | 0     | 0     | 0     | 0     | 0     | 0     | 0     | 0     | 0     | 0     | 0     | 0     | 0     | Mbl1   |
| Mbl2   | 0     | 3     | 0     | 0     | 0     | 2     | 0     | 4     | 2     | 1     | 0     | 1     | 2     | 1     | 0     | 0     | 0     | 0     | 0     | 0     | 0     | 0     | 1     | 3     | 0     | 0     | 0     | 0     | Mbl2   |
| Mblac1 | 284   | 271   | 323   | 285   | 320   | 269   | 253   | 270   | 278   | 342   | 236   | 300   | 282   | 271   | 257   | 207   | 343   | 232   | 286   | 298   | 250   | 206   | 272   | 297   | 235   | 332   | 299   | 212   | Mblac1 |
| Mblac2 | 1746  | 1464  | 1978  | 2573  | 2542  | 2508  | 2865  | 1032  | 946   | 934   | 1107  | 852   | 883   | 874   | 1841  | 1703  | 2033  | 2600  | 2272  | 2193  | 2738  | 1544  | 1003  | 819   | 1132  | 706   | 739   | 891   | Mblac2 |
| Mbn1   | 4245  | 3047  | 2766  | 3300  | 3683  | 3847  | 3903  | 5490  | 5795  | 4208  | 6026  | 3290  | 4524  | 3824  | 4399  | 4274  | 2438  | 3708  | 3167  | 3789  | 3766  | 4371  | 5531  | 4288  | 3810  | 3893  | 3914  | 3885  | Mbn1   |
| Mbn2   | 10905 | 7001  | 6794  | 6599  | 6414  | 7913  | 7434  | 6530  | 7247  | 5670  | 7782  | 4456  | 5830  | 4852  | 9349  | 9787  | 6509  | 7362  | 5725  | 6804  | 6997  | 5900  | 7575  | 5576  | 4420  | 5247  | 5037  | 4859  | Mbn2   |
| Mbn3   | 11119 | 636   | 346   | 379   | 369   | 678   | 541   | 1087  | 1251  | 642   | 1149  | 768   | 1023  | 790   | 823   | 917   | 371   | 432   | 408   | 617   | 501   | 451   | 1273  | 568   | 562   | 355   | 990   | 767   | Mbn3   |
| Mboat1 | 514   | 431   | 488   | 294   | 229   | 287   | 229   | 280   | 345   | 273   | 328   | 307   | 302   | 311   | 411   | 583   | 375   | 327   | 205   | 200   | 189   | 249   | 287   | 271   | 230   | 402   | 336   | 344   | Mboat1 |
| Mboat2 | 7722  | 6612  | 5920  | 6998  | 7274  | 7503  | 7386  | 6161  | 5235  | 5561  | 5359  | 5733  | 5557  | 5812  | 7861  | 6979  | 5997  | 6974  | 6868  | 7651  | 7411  | 6084  | 5387  | 5078  | 6094  | 4615  | 5819  | 5692  | Mboat2 |
| Mboat4 | 2     | 9     | 4     | 0     | 2     | 1     | 1     | 2     | 4     | 1     | 6     | 2     | 6     | 0     | 4     | 2     | 6     | 2     | 12    | 0     | 3     | 2     | 4     | 9     | 8     | 2     | 1     | 0     | Mboat4 |
| Mboat7 | 6210  | 6732  | 6543  | 7550  | 7910  | 7006  | 7330  | 3379  | 3704  | 4027  | 4109  | 3512  | 3367  | 3376  | 5748  | 6266  | 7113  | 7745  | 7638  | 5822  | 7376  | 4455  | 3678  | 3680  | 3631  | 3325  | 3005  | 3188  | Mboat7 |
| Mbp    | 2002  | 2175  | 2587  | 2229  | 2585  | 2118  | 2114  | 1542  | 1635  | 1751  | 1719  | 2157  | 1842  | 1945  | 1838  | 2201  | 2574  | 2068  | 2570  | 2037  | 2063  | 1928  | 1598  | 1916  | 1883  | 1790  | 1905  | 1851  | Mbp    |
| Mbtd1  | 18430 | 13924 | 15480 | 16114 | 16025 | 17090 | 19542 | 20229 | 16245 | 16652 | 16345 | 19894 | 18329 | 21468 | 17934 | 15066 | 15723 | 15191 | 16491 | 17642 | 18112 | 17708 | 15655 | 17580 | 19252 | 18042 | 21016 | 21318 | Mbtd1  |
| Mbtps1 | 9777  | 9833  | 8588  | 7714  | 7273  | 8447  | 7038  | 10209 | 12275 | 10879 | 12634 | 12194 | 12396 | 11487 | 8865  | 10435 | 8066  | 7996  | 7671  | 6994  | 7262  | 10517 | 12013 | 11254 | 10685 | 11331 | 12117 | 11628 | Mbtps1 |
| Mbtps2 | 3538  | 3036  | 2726  | 3441  | 4285  | 3885  | 4510  | 4893  | 4181  | 3957  | 4062  | 3543  | 3706  | 3515  | 3918  | 3273  | 3266  | 3777  | 3847  | 4288  | 4272  | 4689  | 4067  | 3741  | 4051  | 3337  | 3452  | 3455  | Mbtps2 |
| Mc1r   | 23    | 29    | 20    | 13    | 31    | 29    | 18    | 10    | 8     | 5     | 6     | 5     | 16    | 16    | 12    | 13    | 23    | 30    | 23    | 21    | 2     | 15    | 7     | 7     | 0     | 8     | 5     | Mc1r  |        |
| Mc2r   | 0     | 0     | 0     | 1     | 0     | 0     | 0     | 0     | 2     | 2     | 7     | 0     | 1     | 0     | 0     | 0     | 0     | 0     | 0     | 0     | 0     | 0     | 6     | 0     | 0     | 0     | 0     | 0     | Mc2r   |
| Mc3r   | 1     | 1     | 2     | 4     | 7     | 5     | 6     | 10    | 8     | 22    | 13    | 11    | 0     | 4     | 9     | 4     | 2     | 13    | 7     | 3     | 10    | 10    | 6     | 4     | 6     | 4     | 0     | 1     | Mc3r   |
| Mc4r   | 238   | 214   | 210   | 159   | 249   | 211   | 160   | 162   | 174   | 216   | 132   | 73    | 130   | 99    | 223   | 185   | 239   | 169   | 168   | 183   | 190   | 110   | 161   | 123   | 95    | 146   | 116   | 94    | Mc4r   |
| Mc5r   | 125   | 92    | 118   | 134   | 224   | 153   | 130   | 125   | 112   | 108   | 154   | 58    | 79    | 53    | 121   | 129   | 116   | 178   | 136   | 155   | 193   | 147   | 183   | 105   | 67    | 53    | 50    | 40    | Mc5r   |
| Mcam   | 6687  | 6626  | 5969  | 5106  | 4650  | 4849  | 4872  | 2927  | 3270  | 3082  | 3727  | 2888  | 2982  | 2818  | 5720  | 6146  | 5696  | 5195  | 4753  | 5242  | 4508  | 3502  | 3575  | 3364  | 3006  | 3534  | 2865  | 2708  | Mcam   |
| Mcat   | 1490  | 1487  | 1464  | 1385  | 1226  | 1371  | 1257  | 1788  | 1865  | 1740  | 1515  | 1845  | 1838  | 1807  | 1346  | 1266  | 1509  | 1227  | 1452  | 1284  | 1255  | 1566  | 1781  | 1779  | 1646  | 2298  | 1949  | 1851  | Mcat   |
| Mcc    | 904   | 809   | 864   | 824   | 910   | 816   | 628   | 818   | 952   | 946   | 1136  | 649   | 1159  | 639   | 793   | 1007  | 912   | 950   | 764   | 655   | 667   | 1051  | 1173  | 699   | 783   | 626   | 796   | 752   | Mcc    |
| Mccc1  | 2850  | 2649  | 1971  | 2602  | 2748  | 2860  | 2845  | 3413  | 3343  | 2768  | 3118  | 2966  | 3087  | 3081  | 2869  | 2511  | 2186  | 2500  | 2564  | 2958  | 2926  | 2719  | 3109  | 2736  | 3181  | 2418  | 3103  | 2948  | Mccc1  |
| Mccc2  | 1899  | 1956  | 1915  | 1641  | 1483  | 1789  | 1616  | 1490  | 1666  | 1418  | 1622  | 1644  | 1528  | 1605  | 1950  | 1963  | 1875  | 1725  | 1643  | 1759  | 1672  | 1362  | 1759  | 1584  | 1595  | 1758  | 1620  | 1570  | Mccc2  |
| Mcee   | 776   | 726   | 714   | 719   | 604   | 617   | 767   | 558   | 552   | 532   | 490   | 445   | 510   | 563   | 761   | 610   | 705   | 676   | 627   | 796   | 693   | 429   | 548   | 588   | 449   | 517   | 438   | 548   | Mcee   |
| Mcemp1 | 3     | 8     | 9     | 16    | 13    | 7     | 9     | 5     | 7     | 6     | 2     | 10    | 14    | 3     | 28    | 16    | 9     | 13    | 6     | 7     | 7     | 8     | 14    | 5     | 10    | 8     | 6     | 13    | Mcemp1 |
| Mcf2   | 66    | 71    | 56    | 49    | 90    | 53    | 79    | 144   | 102   | 95    | 122   | 75    | 76    | 120   | 69    | 90    | 86    | 46    | 78    | 77    | 99    | 154   | 148   | 95    | 73    | 112   | 121   | 136   | Mcf2   |
| Mcf2l  | 2719  | 3485  | 3561  | 4975  | 7305  | 5599  | 5842  | 8927  | 9363  | 11627 | 10051 | 10413 | 8968  | 11049 | 3189  | 2929  | 4606  | 5468  | 6726  | 5071  | 6309  | 13774 | 8908  | 11237 | 13767 | 7454  | 9941  | 9609  | Mcf2l  |
| Mcf2d  | 4316  | 4184  | 3872  | 3485  | 2891  | 3285  | 3157  | 2947  | 2988  | 2513  | 3042  | 2654  | 2697  | 2632  | 4114  | 4132  | 3787  | 3372  | 3343  | 3511  | 3145  | 2707  | 3268  | 17220 | 2469  | 3108  | 2833  | 2760  | Mcf2d  |
| Mchr1  | 67    | 73    | 73    | 75    | 122   | 102   | 108   | 44    | 54    | 60    | 66    | 38    | 17    | 34    | 65    | 58    | 79    | 96    | 115   | 104   | 94    | 65    | 56    | 55    | 34    | 31    | 29    | 44    | Mchr1  |
| Mcidas | 51    | 34    | 50    | 50    | 52    | 47    | 54    | 138   | 125   | 143   | 112   | 325   | 301   |       |       |       |       |       |       |       |       |       |       |       |       |       |       |       |        |



|        |       |       |       |       |       |       |       |       |       |       |       |       |       |       |       |       |       |       |       |       |       |       |       |       |       |       |       |       |        |
|--------|-------|-------|-------|-------|-------|-------|-------|-------|-------|-------|-------|-------|-------|-------|-------|-------|-------|-------|-------|-------|-------|-------|-------|-------|-------|-------|-------|-------|--------|
| Mcub   | 178   | 185   | 149   | 194   | 190   | 187   | 245   | 87    | 92    | 99    | 74    | 94    | 64    | 82    | 165   | 174   | 147   | 169   | 199   | 191   | 210   | 94    | 86    | 90    | 98    | 92    | 101   | 83    | Mcub   |
| Mcur1  | 1519  | 1418  | 1244  | 1404  | 1176  | 1240  | 1477  | 1218  | 1248  | 1213  | 1398  | 1374  | 1386  | 1458  | 1381  | 1382  | 1364  | 1267  | 1205  | 1199  | 1281  | 1245  | 1342  | 1350  | 1272  | 1380  | 1469  | 1431  | Mcur1  |
| Mdc1   | 13480 | 13460 | 13097 | 14418 | 12016 | 12171 | 13162 | 8763  | 9508  | 10489 | 9842  | 13605 | 11332 | 13474 | 12183 | 13006 | 14183 | 13906 | 13526 | 11098 | 12883 | 8696  | 8259  | 11376 | 10373 | 9870  | 12570 | 12392 | Mdc1   |
| Mdf1   | 2194  | 2640  | 2298  | 1597  | 1073  | 1466  | 739   | 1209  | 1779  | 1475  | 2060  | 1134  | 1621  | 845   | 1909  | 2960  | 2044  | 1546  | 1180  | 1010  | 804   | 1146  | 1985  | 1449  | 930   | 1978  | 1166  | 1035  | Mdf1   |
| Mdfic  | 1025  | 655   | 941   | 682   | 626   | 881   | 568   | 1656  | 1874  | 1582  | 1993  | 1718  | 2071  | 1632  | 935   | 878   | 835   | 817   | 690   | 519   | 544   | 1945  | 2331  | 1735  | 1463  | 1897  | 1858  | 1809  | Mdfic  |
| Mdfic2 | 0     | 3     | 0     | 4     | 1     | 0     | 0     | 5     | 2     | 12    | 6     | 0     | 5     | 1     | 1     | 2     | 0     | 3     | 0     | 0     | 0     | 7     | 4     | 0     | 4     | 2     | 8     | 0     | Mdfic2 |
| Mdga1  | 3147  | 4062  | 5611  | 7075  | 10186 | 7527  | 6813  | 5632  | 6171  | 8619  | 6794  | 7585  | 6294  | 6277  | 3574  | 3559  | 7130  | 7845  | 9861  | 6391  | 7872  | 10281 | 6319  | 8043  | 9941  | 4479  | 6505  | 6509  | Mdga1  |
| Mdga2  | 1497  | 1108  | 1032  | 1221  | 1645  | 1667  | 1443  | 1848  | 2023  | 1671  | 1678  | 1358  | 1534  | 1394  | 1659  | 1482  | 990   | 1512  | 1230  | 1579  | 1582  | 2142  | 1775  | 1298  | 1605  | 829   | 1390  | 1229  | Mdga2  |
| Mdh1   | 26579 | 25543 | 21647 | 24003 | 19851 | 21593 | 23006 | 18421 | 16022 | 14143 | 13386 | 14698 | 14446 | 14791 | 28193 | 24540 | 23235 | 22455 | 22788 | 29041 | 22144 | 13904 | 15738 | 14917 | 13919 | 16153 | 15966 | 15281 | Mdh1   |
| Mdh1b  | 18    | 10    | 23    | 13    | 32    | 23    | 23    | 27    | 43    | 24    | 43    | 45    | 35    | 18    | 40    | 26    | 21    | 31    | 12    | 29    | 19    | 38    | 41    | 16    | 26    | 34    | 14    | 25    | Mdh1b  |
| Mdh2   | 14113 | 17493 | 14251 | 14616 | 13075 | 12989 | 13739 | 10989 | 11839 | 11572 | 10836 | 12313 | 12018 | 12457 | 13818 | 14599 | 14698 | 13542 | 13878 | 13983 | 13844 | 10586 | 11259 | 11772 | 12147 | 13008 | 12832 | 13208 | Mdh2   |
| Mdk    | 10024 | 9497  | 10508 | 6886  | 4755  | 6368  | 4600  | 9574  | 12008 | 11003 | 13325 | 11468 | 13577 | 11606 | 7617  | 10413 | 8112  | 6167  | 5539  | 6038  | 4345  | 6721  | 12158 | 12914 | 8814  | 19033 | 13237 | 12525 | Mdk    |
| Mdm1   | 11400 | 12065 | 9610  | 10669 | 8754  | 9697  | 10363 | 4362  | 3820  | 3791  | 3520  | 4650  | 4440  | 4654  | 11127 | 11135 | 9564  | 10365 | 9163  | 10664 | 10138 | 3559  | 3740  | 4144  | 4075  | 4627  | 5075  | 4705  | Mdm1   |
| Mdm2   | 4127  | 4256  | 4855  | 5488  | 4979  | 4654  | 5167  | 5935  | 4859  | 6159  | 5656  | 7128  | 6150  | 7403  | 4127  | 3967  | 5241  | 5218  | 4863  | 4419  | 5320  | 6597  | 5020  | 6976  | 6749  | 7331  | 6783  | 7189  | Mdm2   |
| Mdm4   | 17548 | 14455 | 11635 | 14877 | 15590 | 17344 | 17298 | 24845 | 20555 | 19448 | 21324 | 20600 | 20053 | 20934 | 17271 | 15608 | 12983 | 15220 | 14830 | 16908 | 17368 | 19976 | 19787 | 17768 | 20364 | 13517 | 21264 | 18646 | Mdm4   |
| Mdn1   | 19777 | 20638 | 8701  | 12178 | 11598 | 16932 | 13977 | 12320 | 12152 | 7682  | 8916  | 7811  | 8035  | 8398  | 19020 | 18600 | 9786  | 11946 | 11033 | 19072 | 16964 | 6542  | 10532 | 6858  | 8782  | 5245  | 9857  | 7379  | Mdn1   |
| Mdp1   | 1979  | 2027  | 2165  | 1919  | 2104  | 1983  | 2133  | 2583  | 2488  | 2452  | 2367  | 2837  | 2726  | 2892  | 2109  | 1932  | 2289  | 1860  | 2110  | 2479  | 2007  | 2348  | 2497  | 2656  | 2584  | 2993  | 3001  | 2909  | Mdp1   |
| Me1    | 1059  | 1030  | 994   | 926   | 1365  | 1149  | 938   | 1537  | 1589  | 1653  | 1937  | 1278  | 1762  | 1256  | 1134  | 1319  | 962   | 1139  | 1084  | 929   | 1087  | 2052  | 1937  | 1332  | 1649  | 1164  | 1187  | 1289  | Me1    |
| Me2    | 3226  | 3004  | 2787  | 2284  | 2270  | 2523  | 2592  | 2915  | 2954  | 2544  | 2620  | 2914  | 3071  | 3044  | 3190  | 3013  | 2540  | 2163  | 2241  | 2761  | 2385  | 2453  | 2834  | 2592  | 2532  | 2741  | 3295  | 3315  | Me2    |
| Me3    | 66    | 48    | 46    | 46    | 70    | 60    | 59    | 99    | 105   | 89    | 100   | 58    | 44    | 61    | 49    | 65    | 53    | 42    | 51    | 60    | 63    | 109   | 105   | 85    | 90    | 85    | 71    | 53    | Me3    |
| Mea1   | 2654  | 3722  | 3150  | 3211  | 2964  | 2896  | 3123  | 2989  | 3273  | 3248  | 3002  | 2904  | 3004  | 3769  | 3086  | 2896  | 3358  | 2974  | 3218  | 3602  | 3345  | 2593  | 3319  | 3291  | 3232  | 3407  | 3253  | 3533  | Mea1   |
| Meaf6  | 2129  | 2166  | 2451  | 3006  | 3513  | 3259  | 3289  | 4968  | 5061  | 6210  | 5371  | 6461  | 5505  | 6209  | 2093  | 1798  | 2898  | 3198  | 3647  | 3149  | 3368  | 6452  | 4923  | 6544  | 7106  | 6798  | 5799  | 5985  | Meaf6  |
| Meak7  | 937   | 1023  | 1011  | 973   | 999   | 952   | 1064  | 942   | 1086  | 1024  | 1037  | 1105  | 1082  | 1049  | 829   | 892   | 1109  | 988   | 1106  | 905   | 1037  | 976   | 1043  | 1205  | 1110  | 1284  | 1152  | 1144  | Meak7  |
| Mecom  | 1671  | 1444  | 2025  | 868   | 936   | 983   | 637   | 2014  | 2348  | 1788  | 2636  | 1423  | 2765  | 1492  | 1851  | 1653  | 1307  | 716   | 805   | 929   | 757   | 1972  | 2449  | 1178  | 1202  | 1571  | 2086  | 1773  | Mecom  |
| Mecp2  | 7608  | 7305  | 5736  | 8623  | 11225 | 10955 | 10869 | 14428 | 13228 | 14101 | 14051 | 14674 | 13442 | 14895 | 7745  | 6456  | 7139  | 8819  | 9760  | 9017  | 11667 | 15672 | 12213 | 12131 | 16603 | 8640  | 14752 | 13460 | Mecp2  |
| Mecr   | 2149  | 2760  | 2146  | 2417  | 1730  | 1999  | 1983  | 989   | 1102  | 1062  | 1105  | 1214  | 1145  | 1182  | 2054  | 2428  | 2216  | 2418  | 2015  | 1871  | 2004  | 936   | 1080  | 1038  | 1103  | 1322  | 1293  | 1275  | Mecr   |
| Med1   | 9059  | 8608  | 7745  | 9605  | 9178  | 9093  | 9683  | 9108  | 8538  | 8940  | 8788  | 9854  | 9703  | 10010 | 8881  | 8224  | 8770  | 8904  | 9030  | 8813  | 9554  | 8779  | 8195  | 9237  | 9424  | 7459  | 10162 | 10026 | Med1   |
| Med10  | 3644  | 4440  | 4247  | 4542  | 3654  | 4004  | 4067  | 2638  | 2731  | 2610  | 2569  | 2967  | 2896  | 3050  | 3889  | 4198  | 4161  | 4225  | 3892  | 4153  | 3938  | 2480  | 2642  | 2965  | 2793  | 3282  | 3153  | 3266  | Med10  |
| Med11  | 452   | 525   | 555   | 420   | 411   | 428   | 440   | 849   | 952   | 830   | 877   | 957   | 961   | 414   | 449   | 512   | 379   | 468   | 631   | 415   | 782   | 957   | 853   | 763   | 1030  | 888   | 898   | Med11 |        |
| Med12  | 5395  | 5392  | 4539  | 5462  | 6430  | 6367  | 5754  | 7458  | 8427  | 8700  | 9032  | 9841  | 9440  | 9012  | 5229  | 5664  | 5187  | 5822  | 6028  | 5498  | 6067  | 8946  | 7568  | 8241  | 9083  | 5376  | 9097  | 8816  | Med12  |
| Med12l | 2024  | 1744  | 1683  | 2834  | 3569  | 3862  | 3443  | 2847  | 2623  | 3556  | 2984  | 2660  | 2742  | 3043  | 1990  | 2011  | 1992  | 2571  | 2915  | 2558  | 3519  | 3171  | 2301  | 2799  | 3171  | 2283  | 2535  | 2194  | Med12l |
| Med13  | 12966 | 9878  | 10551 | 12429 | 13045 | 13966 | 14427 | 15917 | 13935 | 13270 | 13469 | 14657 | 14537 | 15895 | 12585 | 11812 | 11420 | 12041 | 12553 | 12296 | 14120 | 13812 | 12439 | 12924 | 15662 | 11903 | 15322 | 14853 | Med13  |
| Med13l | 6170  | 6956  | 6524  | 9192  | 9205  | 8366  | 9018  | 5906  | 6762  | 7904  | 8111  | 7865  | 7302  | 7661  | 5933  | 6555  | 7559  | 9245  | 9077  | 7274  | 9100  | 7546  | 6427  | 7572  | 8744  | 5311  | 6760  | 6741  | Med13l |
| Med14  | 12132 | 10322 | 7643  | 9094  | 9136  | 10832 | 11177 | 9744  | 8892  | 7052  | 7377  | 8698  | 7370  | 8575  | 11900 | 9609  | 8633  | 8718  | 9132  | 11251 | 11100 | 7294  | 7915  | 7116  | 8038  | 6713  | 8901  | 8051  | Med14  |
| Med15  | 2646  | 3042  | 2931  | 3112  | 3080  | 2972  | 2728  | 2705  | 3234  | 3444  | 3404  | 3685  | 3198  | 3260  | 2534  | 2860  | 3048  | 3159  | 3263  | 2407  | 2638  | 3501  | 3095  | 3556  | 3653  | 3953  | 3086  | 2989  | Med15  |
| Med16  | 1370  | 1672  | 1770  | 1685  | 1685  | 1636  | 1406  | 2700  | 3239  | 3297  | 3167  | 3735  | 3587  | 3061  | 1480  | 1604  | 1686  | 1584  | 1799  | 1464  | 1449  | 3240  | 3204  | 3515  | 3307  | 3971  | 3526  | 3363  | Med16  |
| Med17  | 3811  | 3831  | 3629  | 3306  | 3049  | 3261  | 3540  | 3655  | 3117  | 2998  | 2966  | 3556  | 3164  | 3671  | 3740  | 3440  | 3252  | 3121  | 3088  | 3694  | 3287  | 3050  | 3055  | 3183  | 3277  | 3537  | 3485  | 3604  | Med17  |
| Med18  | 623   | 667   | 744   | 765   | 450   | 527   | 574   | 447   | 451   | 403   | 405   | 597   | 526   | 510   | 589   | 676   | 703   | 651   | 547   | 547   | 493   | 331   | 467   | 536   | 509   | 627   | 678   | 579   | Med18  |
| Med19  | 3402  | 3642  | 3655  | 3360  | 3388  | 3270  | 3846  | 3009  | 2748  | 2849  | 2381  | 3367  | 2892  | 3306  | 3622  | 3410  | 3614  | 3355  | 3561  | 3431  | 3553  | 3008  | 2801  | 3179  | 3049  | 3769  | 3151  | 3501  | Med19  |
| Med20  | 3166  | 3216  | 2662  | 2816  | 2399  | 2502  | 2462  | 3088  | 2893  | 2614  | 2807  | 2629  | 2614  | 2712  | 2943  | 3244  | 2745  | 2698  | 2636  | 2835  | 2423  | 2780  | 2759  | 2729  | 2555  | 2539  | 2712  | 2721  | Med20  |
| Med21  | 2603  | 2205  | 2526  | 2372  | 2171  | 2189  | 2732  | 2577  | 2242  | 1803  | 2184  | 2136  | 2285  | 2622  | 2670  | 2279  | 2360  | 2060  | 2364  | 2734  | 2498  | 2396  | 2236  | 2242  | 1990  | 2599  | 2471  | 2684  | Med21  |
| Med22  | 7968  | 8522  | 6989  | 7691  | 6464  | 6854  | 6962  | 5103  | 5553  | 6099  | 5378  | 5527  | 5466  | 5481  | 7038  | 7388  | 7990  | 7263  | 7442  | 6853  | 6655  | 5088  | 5358  | 5973  | 5565  | 6661  | 6021  | 5517  | Med22  |
| Med23  | 6382  | 6613  | 5152  | 5313  | 5445  | 5531  | 6117  | 7482  | 6908  | 6645  | 6325  | 7205  | 6666  | 7316  | 6206  | 5794  | 5054  | 5195  | 5584  | 5975  | 5909  | 6898  | 6653  | 6459  | 6908  | 6219  | 7059  | 6894  | Med23  |
| Med24  | 4405  | 5171  | 4856  | 4576  | 4951  | 4682  | 4676  | 6953  | 7719  | 7660  | 6815  | 8771  | 7813  | 8019  | 4350  | 4188  | 4850  | 4615  | 5609  | 4889  | 4964  | 7823  | 6983  | 7965  | 8392  | 8037  | 8003  | 8078  | Med24  |
| Med25  | 7958  | 11159 | 11905 | 11717 | 10110 | 9557  | 9198  | 6056  | 6895  | 7902  | 7309  | 10170 | 7931  | 8520  | 7899  | 9294  | 12381 | 11221 | 11524 | 8435  | 9489  | 7919  | 6768  | 8685  | 8389  | 10444 | 8546  | 8638  | Med25  |
| Med26  | 858   | 1209  | 1038  | 1486  | 980   | 882   | 919   | 679   | 819   | 780   | 823   | 968   | 811   | 819   | 785   | 1052  | 1179  | 1139  | 1020  | 797   | 948   | 819   | 777   | 791   | 906   | 1070  | 795</ |       |        |

|         |       |       |       |       |       |       |       |       |       |       |       |       |       |       |       |       |       |       |       |       |       |       |       |       |       |       |       |       |         |
|---------|-------|-------|-------|-------|-------|-------|-------|-------|-------|-------|-------|-------|-------|-------|-------|-------|-------|-------|-------|-------|-------|-------|-------|-------|-------|-------|-------|-------|---------|
| Memo1   | 4054  | 3048  | 4132  | 3476  | 3634  | 3780  | 4016  | 4943  | 4048  | 4104  | 4282  | 4694  | 4643  | 5204  | 3972  | 3234  | 3629  | 3206  | 3494  | 3742  | 3971  | 3913  | 4073  | 4581  | 4316  | 5050  | 4974  | 5467  | Memo1   |
| Meox1   | 75    | 43    | 25    | 21    | 25    | 23    | 13    | 121   | 168   | 91    | 809   | 42    | 100   | 39    | 61    | 86    | 19    | 20    | 19    | 14    | 21    | 175   | 419   | 105   | 43    | 71    | 36    | 39    | Meox1   |
| Meox2   | 200   | 101   | 136   | 75    | 88    | 183   | 63    | 231   | 712   | 298   | 1223  | 93    | 344   | 54    | 183   | 252   | 82    | 134   | 122   | 95    | 47    | 541   | 1325  | 154   | 251   | 118   | 63    | 81    | Meox2   |
| Mep1a   | 1     | 1     | 2     | 1     | 2     | 0     | 2     | 7     | 6     | 3     | 18    | 5     | 0     | 4     | 3     | 5     | 2     | 0     | 3     | 8     | 3     | 5     | 10    | 2     | 2     | 8     | 2     | 5     | Mep1a   |
| Mep1b   | 0     | 0     | 0     | 0     | 0     | 0     | 0     | 1     | 1     | 2     | 1     | 0     | 1     | 1     | 0     | 0     | 2     | 0     | 0     | 0     | 0     | 0     | 3     | 0     | 0     | 0     | 1     | 0     | Mep1b   |
| Mepce   | 1802  | 2275  | 2636  | 2622  | 2568  | 2194  | 2319  | 3072  | 3142  | 3593  | 3382  | 3688  | 3276  | 3640  | 1725  | 1916  | 2626  | 2619  | 2862  | 2120  | 2406  | 3061  | 3216  | 3825  | 3489  | 4303  | 3590  | 3650  | Mepce   |
| Mertk   | 1481  | 1210  | 1281  | 872   | 749   | 905   | 640   | 920   | 1065  | 1039  | 1370  | 741   | 1103  | 690   | 1180  | 1712  | 927   | 939   | 720   | 609   | 624   | 847   | 1127  | 902   | 616   | 1142  | 766   | 749   | Mertk   |
| Mesd    | 4049  | 3981  | 3954  | 3327  | 2981  | 2961  | 3279  | 3301  | 3075  | 2939  | 3144  | 3329  | 3339  | 3150  | 3981  | 3965  | 3337  | 3211  | 3183  | 3217  | 3129  | 2924  | 3298  | 3063  | 2883  | 3613  | 3498  | 3437  | Mesd    |
| Mesp1   | 0     | 1     | 0     | 6     | 0     | 0     | 0     | 0     | 0     | 1     | 1     | 0     | 2     | 2     | 1     | 0     | 1     | 0     | 2     | 3     | 0     | 2     | 0     | 0     | 0     | 2     | 2     | 0     | Mesp1   |
| Mesp2   | 12    | 13    | 22    | 8     | 17    | 25    | 13    | 32    | 24    | 13    | 21    | 24    | 17    | 16    | 8     | 11    | 24    | 10    | 20    | 15    | 14    | 15    | 33    | 26    | 23    | 28    | 20    | 27    | Mesp2   |
| Mest    | 44731 | 38352 | 39360 | 23165 | 20663 | 24268 | 24274 | 37758 | 43055 | 31409 | 58759 | 42525 | 41012 | 42737 | 42660 | 43919 | 31333 | 23895 | 20768 | 24579 | 20182 | 36755 | 52323 | 34602 | 30694 | 57390 | 42467 | 45623 | Mest    |
| Met     | 912   | 622   | 533   | 426   | 637   | 542   | 453   | 625   | 756   | 565   | 914   | 338   | 502   | 349   | 789   | 741   | 457   | 474   | 500   | 504   | 518   | 388   | 884   | 420   | 262   | 232   | 396   | 362   | Met     |
| Metap1  | 7029  | 6664  | 5762  | 6255  | 5760  | 6036  | 6067  | 5324  | 4501  | 4252  | 4433  | 4316  | 4368  | 4240  | 6910  | 6798  | 5759  | 6209  | 5791  | 6689  | 6139  | 4395  | 4482  | 4144  | 4313  | 4294  | 4564  | 4474  | Metap1  |
| Metap1d | 2530  | 2097  | 1701  | 1838  | 1891  | 2184  | 2338  | 3482  | 3178  | 2820  | 2838  | 2774  | 2530  | 3195  | 2458  | 2074  | 1971  | 2101  | 2067  | 2445  | 2344  | 2640  | 3029  | 2567  | 2669  | 2480  | 2818  | 2777  | Metap1d |
| Metap2  | 17928 | 15132 | 17761 | 14929 | 14058 | 14713 | 16054 | 17514 | 15451 | 15823 | 14328 | 16937 | 16071 | 17263 | 18609 | 15595 | 16120 | 14175 | 14908 | 17089 | 15166 | 14646 | 15297 | 15923 | 15455 | 18772 | 17242 | 18111 | Metap2  |
| Methig1 | 0     | 0     | 0     | 0     | 0     | 0     | 0     | 2     | 4     | 0     | 3     | 0     | 3     | 0     | 0     | 1     | 0     | 3     | 0     | 0     | 0     | 2     | 0     | 0     | 0     | 0     | 0     | 0     | Methig1 |
| Metrn   | 6245  | 8231  | 7571  | 6507  | 3845  | 4173  | 4646  | 2191  | 2168  | 2064  | 1845  | 3276  | 2536  | 3181  | 5798  | 5828  | 7550  | 4787  | 4705  | 4663  | 4494  | 1815  | 1723  | 2301  | 2117  | 3580  | 3277  | 3449  | Metrn   |
| Metrn1  | 245   | 371   | 308   | 232   | 251   | 247   | 156   | 221   | 282   | 232   | 290   | 156   | 353   | 98    | 310   | 308   | 292   | 224   | 205   | 242   | 166   | 184   | 317   | 191   | 140   | 156   | 205   | 141   | Metrn1  |
| Mett11  | 1218  | 1476  | 1609  | 1310  | 1130  | 1168  | 1225  | 1015  | 1346  | 1179  | 1399  | 1366  | 1249  | 1361  | 1124  | 1423  | 1483  | 1294  | 1128  | 1142  | 1067  | 941   | 1274  | 1309  | 1157  | 1531  | 1383  | 1451  | Mett11  |
| Mett11b | 48    | 16    | 31    | 5     | 14    | 14    | 19    | 42    | 65    | 18    | 29    | 55    | 76    | 62    | 54    | 19    | 10    | 9     | 10    | 17    | 10    | 27    | 54    | 25    | 54    | 38    | 42    | 55    | Mett11b |
| Mett114 | 3178  | 2881  | 3580  | 3031  | 2785  | 2633  | 3108  | 3440  | 3204  | 3229  | 3066  | 3976  | 3677  | 4519  | 2937  | 2829  | 3420  | 2788  | 3026  | 3092  | 2985  | 3130  | 3181  | 3779  | 3616  | 4495  | 4093  | 4308  | Mett114 |
| Mett115 | 257   | 211   | 227   | 183   | 156   | 177   | 202   | 360   | 343   | 251   | 300   | 329   | 290   | 365   | 194   | 207   | 197   | 175   | 207   | 251   | 150   | 234   | 310   | 337   | 308   | 343   | 337   | 347   | Mett115 |
| Mett116 | 3517  | 3606  | 3517  | 3266  | 3534  | 3742  | 3546  | 5797  | 5206  | 4678  | 5006  | 5330  | 4782  | 5355  | 3538  | 3565  | 3501  | 3404  | 3390  | 3806  | 3639  | 5095  | 4944  | 4850  | 5301  | 4964  | 5294  | 5353  | Mett116 |
| Mett117 | 3081  | 3337  | 2867  | 3584  | 3313  | 3003  | 3208  | 2506  | 2384  | 2430  | 2336  | 2447  | 2184  | 2485  | 2774  | 2824  | 2967  | 3375  | 3296  | 3345  | 3197  | 2669  | 2320  | 2537  | 2635  | 2196  | 2243  | 2158  | Mett117 |
| Mett118 | 475   | 375   | 388   | 438   | 444   | 432   | 503   | 491   | 381   | 363   | 428   | 401   | 386   | 421   | 479   | 406   | 435   | 368   | 469   | 578   | 441   | 322   | 430   | 412   | 440   | 476   | 393   | 425   | Mett118 |
| Mett12  | 2584  | 2393  | 2631  | 2315  | 1830  | 2147  | 2107  | 2140  | 2146  | 2117  | 2310  | 2304  | 2383  | 2456  | 2329  | 2410  | 2380  | 2188  | 2067  | 1997  | 2104  | 2102  | 2135  | 2302  | 2157  | 2794  | 2700  | 2451  | Mett12  |
| Mett21a | 652   | 612   | 919   | 691   | 747   | 633   | 650   | 998   | 1035  | 1075  | 1023  | 1083  | 1034  | 1153  | 799   | 728   | 628   | 749   | 695   | 697   | 661   | 993   | 1087  | 1119  | 982   | 1242  | 1052  | 1123  | Mett21a |
| Mett21c | 27    | 16    | 25    | 20    | 22    | 39    | 44    | 131   | 90    | 65    | 83    | 91    | 75    | 79    | 38    | 25    | 15    | 24    | 23    | 31    | 40    | 95    | 72    | 65    | 68    | 63    | 62    | 78    | Mett21c |
| Mett21e | 0     | 0     | 0     | 0     | 3     | 0     | 1     | 0     | 1     | 3     | 3     | 0     | 1     | 0     | 0     | 2     | 0     | 1     | 0     | 0     | 0     | 2     | 2     | 1     | 0     | 0     | 0     | 1     | Mett21e |
| Mett22  | 254   | 339   | 280   | 247   | 417   | 403   | 306   | 590   | 758   | 672   | 671   | 678   | 640   | 650   | 282   | 275   | 275   | 296   | 333   | 466   | 331   | 693   | 761   | 659   | 844   | 617   | 753   | 619   | Mett22  |
| Mett23  | 2283  | 2194  | 1804  | 1966  | 1758  | 2083  | 2297  | 2081  | 1865  | 1764  | 1546  | 1782  | 1782  | 1950  | 2350  | 1819  | 2100  | 1931  | 2287  | 2296  | 2380  | 1865  | 1878  | 1870  | 1828  | 1909  | 1855  | 2013  | Mett23  |
| Mett24  | 3     | 8     | 11    | 6     | 5     | 5     | 6     | 20    | 17    | 23    | 37    | 17    | 22    | 20    | 4     | 9     | 6     | 4     | 2     | 1     | 7     | 15    | 19    | 17    | 16    | 12    | 3     | 14    | Mett24  |
| Mett25  | 218   | 233   | 229   | 308   | 298   | 255   | 310   | 760   | 741   | 702   | 657   | 860   | 637   | 847   | 265   | 184   | 292   | 244   | 284   | 286   | 288   | 774   | 688   | 760   | 739   | 831   | 722   | 725   | Mett25  |
| Mett26  | 916   | 1308  | 1199  | 1051  | 950   | 935   | 964   | 939   | 966   | 917   | 830   | 1120  | 1082  | 1122  | 1021  | 1079  | 1218  | 910   | 1044  | 1240  | 980   | 932   | 962   | 1058  | 982   | 1173  | 1119  | 1054  | Mett26  |
| Mett27  | 1129  | 1215  | 1234  | 1180  | 806   | 1171  | 882   | 410   | 479   | 517   | 487   | 426   | 539   | 490   | 1077  | 1208  | 1394  | 1106  | 895   | 892   | 803   | 356   | 493   | 471   | 344   | 634   | 470   | 460   | Mett27  |
| Mett3   | 3756  | 3924  | 4101  | 3974  | 3334  | 3207  | 3613  | 3616  | 3262  | 3423  | 3145  | 3647  | 3200  | 3625  | 3744  | 3465  | 3955  | 3561  | 3772  | 3613  | 3531  | 3546  | 3221  | 3637  | 3397  | 3768  | 3822  | 3789  | Mett3   |
| Mett4   | 2084  | 1895  | 2015  | 1958  | 2077  | 2076  | 2377  | 5127  | 4390  | 4118  | 3769  | 4355  | 4008  | 4443  | 2382  | 1927  | 2001  | 1914  | 2198  | 2534  | 2233  | 4029  | 4138  | 3983  | 4249  | 3667  | 4341  | 4498  | Mett4   |
| Mett5   | 859   | 724   | 861   | 845   | 884   | 827   | 825   | 724   | 613   | 683   | 644   | 857   | 805   | 895   | 773   | 674   | 926   | 732   | 780   | 780   | 862   | 708   | 671   | 771   | 610   | 792   | 891   | 902   | Mett5   |
| Mett6   | 5394  | 4919  | 4844  | 4720  | 3895  | 4319  | 4598  | 4019  | 3459  | 3137  | 3315  | 3709  | 3708  | 3898  | 5351  | 4992  | 4495  | 4258  | 4215  | 4804  | 4593  | 3255  | 3348  | 3575  | 3480  | 4029  | 3747  | 4297  | Mett6   |
| Mett7a1 | 721   | 798   | 979   | 771   | 731   | 629   | 656   | 723   | 679   | 741   | 786   | 720   | 692   | 810   | 676   | 766   | 953   | 786   | 803   | 756   | 726   | 643   | 737   | 876   | 722   | 894   | 838   | 885   | Mett7a1 |
| Mett7a2 | 0     | 1     | 0     | 0     | 0     | 0     | 0     | 0     | 0     | 0     | 0     | 0     | 0     | 0     | 0     | 0     | 0     | 0     | 0     | 0     | 0     | 0     | 0     | 0     | 0     | 0     | 0     | 0     | Mett7a2 |
| Mett7a3 | 5     | 13    | 4     | 9     | 20    | 0     | 13    | 15    | 9     | 8     | 7     | 2     | 10    | 1     | 9     | 11    | 6     | 19    | 7     | 5     | 5     | 28    | 12    | 2     | 11    | 3     | 3     | 1     | Mett7a3 |
| Mett7b  | 0     | 0     | 0     | 1     | 0     | 0     | 1     | 0     | 0     | 2     | 2     | 0     | 0     | 0     | 0     | 2     | 0     | 0     | 0     | 0     | 0     | 0     | 0     | 1     | 0     | 0     | 0     | 0     | Mett7b  |
| Mett8   | 2412  | 2363  | 2115  | 2231  | 1828  | 2037  | 2358  | 1616  | 1462  | 1384  | 1329  | 1555  | 1552  | 1431  | 2614  | 2163  | 2249  | 2025  | 2145  | 2169  | 2211  | 1322  | 1320  | 1302  | 1319  | 1233  | 1633  | 1470  | Mett8   |
| Mett9   | 7041  | 5984  | 7421  | 6664  | 7055  | 6435  | 8507  | 9733  | 8363  | 9426  | 8729  | 10510 | 9237  | 11933 | 7373  | 6083  | 7226  | 6531  | 7357  | 6425  | 7866  | 9845  | 8226  | 10321 | 9377  | 11850 | 10046 | 11743 | Mett9   |
| Mex3a   | 13004 | 12645 | 19171 | 17319 | 19945 | 17883 | 18020 | 25350 | 23628 | 29211 | 27663 | 34989 | 29659 | 36638 | 12398 | 11270 | 19586 | 16505 | 21404 | 14506 | 18587 | 31697 | 21575 | 35789 | 36351 | 34217 | 32065 | 36566 | Mex3a   |
| Mex3b   | 4455  | 3982  | 5098  | 4331  | 5710  | 5368  | 5674  | 10481 | 9887  | 9396  | 9186  | 11119 | 10155 | 11912 | 4134  | 3734  | 5004  | 4401  | 6198  | 5021  | 5605  | 11070 | 9193  | 11664 | 11513 | 11919 | 10315 | 11552 | Mex3b   |
| Mex3c   | 8187  | 6754  | 7744  | 7035  | 7171  | 7201  | 7818  | 8971  | 7314  | 6964  | 6527  | 7449  | 8275  | 7956  | 7211  | 7646  | 6837  | 7594  | 7661  | 7662  | 7957  | 6987  | 7405  | 7268  | 8868  | 7977  | 8535  | Mex3c |         |
| Mex3d   | 3432  | 4473  | 5026  | 4959  | 4588  | 3884  | 4121  | 4082  | 4082  | 5155  | 4636  | 5440  | 4487  | 5950  | 3353  | 3445  | 4582  | 4543  | 4988  | 3569  | 4590  | 5138  | 3983  | 5815  | 5737  | 5709  | 5291  | 5765  | Mex3d   |
| Mfap1a  | 4056  | 3558  | 3974  | 3917  | 3301  | 3589  | 3902  | 3145  | 2730  | 2935  | 2800  | 2899  | 2893  | 3193  | 4147  | 3930  | 4081  |       |       |       |       |       |       |       |       |       |       |       |         |

|          |       |       |       |       |       |       |       |       |       |       |       |       |       |       |       |       |       |       |       |       |       |       |       |       |       |       |       |         |          |
|----------|-------|-------|-------|-------|-------|-------|-------|-------|-------|-------|-------|-------|-------|-------|-------|-------|-------|-------|-------|-------|-------|-------|-------|-------|-------|-------|-------|---------|----------|
| Mfsd6    | 399   | 466   | 415   | 531   | 893   | 570   | 592   | 1843  | 1576  | 1856  | 1605  | 1438  | 1477  | 1683  | 481   | 421   | 445   | 465   | 708   | 532   | 593   | 2242  | 1489  | 1567  | 1926  | 1071  | 1363  | 1424    | Mfsd6    |
| Mfsd6l   | 9     | 12    | 5     | 2     | 11    | 10    | 7     | 5     | 13    | 10    | 22    | 5     | 9     | 7     | 7     | 14    | 10    | 12    | 4     | 2     | 4     | 7     | 7     | 17    | 18    | 14    | 5     | 1       | Mfsd6l   |
| Mfsd7a   | 51    | 54    | 54    | 64    | 47    | 43    | 42    | 78    | 82    | 93    | 151   | 67    | 93    | 93    | 80    | 66    | 60    | 53    | 44    | 51    | 31    | 95    | 117   | 75    | 74    | 71    | 106   | 81      | Mfsd7a   |
| Mfsd8    | 24    | 11    | 27    | 48    | 23    | 106   | 67    | 142   | 62    | 78    | 126   | 47    | 174   | 143   | 32    | 44    | 20    | 17    | 29    | 83    | 38    | 254   | 124   | 91    | 128   | 45    | 232   | 108     | Mfsd8    |
| Mfsd9    | 1029  | 1127  | 786   | 881   | 994   | 943   | 962   | 335   | 363   | 310   | 381   | 262   | 315   | 248   | 1063  | 948   | 918   | 1016  | 818   | 1074  | 891   | 343   | 445   | 284   | 320   | 273   | 249   | 280     | Mfsd9    |
| Mga      | 18457 | 15682 | 9040  | 10959 | 12195 | 15864 | 14871 | 18809 | 16396 | 12169 | 13918 | 12133 | 12989 | 13227 | 18515 | 16047 | 9441  | 10668 | 11161 | 17414 | 15296 | 10923 | 15659 | 9854  | 13530 | 7683  | 14435 | 11811   | Mga      |
| Mgam     | 5     | 20    | 10    | 11    | 11    | 9     | 10    | 17    | 18    | 18    | 35    | 12    | 2     | 9     | 20    | 15    | 1     | 11    | 11    | 10    | 14    | 5     | 38    | 2     | 17    | 2     | 17    | 13      | Mgam     |
| Mgam2-ps | 0     | 1     | 0     | 0     | 0     | 0     | 2     | 1     | 4     | 0     | 0     | 0     | 0     | 0     | 0     | 0     | 0     | 0     | 0     | 0     | 2     | 0     | 2     | 0     | 0     | 0     | 0     | 4       | Mgam2-ps |
| Mgarp    | 460   | 435   | 651   | 326   | 180   | 320   | 140   | 125   | 129   | 102   | 150   | 267   | 262   | 250   | 340   | 576   | 429   | 350   | 239   | 263   | 204   | 94    | 140   | 167   | 139   | 102   | 344   | 325     | Mgarp    |
| Mgat1    | 2285  | 2917  | 2877  | 2819  | 2517  | 2723  | 2187  | 2800  | 3642  | 4073  | 3954  | 3720  | 3758  | 3475  | 2288  | 2673  | 2701  | 2824  | 2624  | 2219  | 2238  | 3369  | 3677  | 3634  | 3572  | 3898  | 3664  | 3415    | Mgat1    |
| Mgat2    | 3887  | 3266  | 3023  | 2946  | 2588  | 3034  | 2842  | 3146  | 2808  | 2437  | 2794  | 2633  | 2756  | 2540  | 3655  | 3340  | 2640  | 3051  | 2598  | 2923  | 2731  | 2951  | 3228  | 2468  | 2618  | 2717  | 2755  | 2788    | Mgat2    |
| Mgat3    | 3071  | 2946  | 3937  | 3647  | 5072  | 3959  | 3674  | 5451  | 5330  | 6766  | 6762  | 6130  | 6052  | 5912  | 3033  | 3093  | 4203  | 3746  | 4458  | 3316  | 3816  | 7770  | 5198  | 6320  | 6864  | 5667  | 5328  | 5811    | Mgat3    |
| Mgat4a   | 2255  | 1844  | 1446  | 1979  | 2740  | 2417  | 2494  | 1893  | 1894  | 1831  | 2034  | 1254  | 1305  | 1377  | 2443  | 2048  | 1603  | 2217  | 2216  | 2280  | 2308  | 1962  | 1988  | 1447  | 1770  | 998   | 1288  | 1194    | Mgat4a   |
| Mgat4b   | 3305  | 3634  | 3932  | 4230  | 4928  | 3921  | 3772  | 3178  | 3425  | 4116  | 3884  | 3617  | 3141  | 3258  | 3189  | 3323  | 4457  | 4278  | 4542  | 3204  | 4222  | 4396  | 3370  | 3912  | 4080  | 4268  | 3148  | 3222    | Mgat4b   |
| Mgat4c   | 280   | 257   | 216   | 466   | 779   | 561   | 541   | 677   | 567   | 579   | 608   | 299   | 482   | 374   | 518   | 350   | 393   | 527   | 486   | 664   | 574   | 832   | 623   | 375   | 662   | 235   | 315   | 354     | Mgat4c   |
| Mgat4d   | 0     | 1     | 0     | 0     | 0     | 0     | 0     | 4     | 0     | 0     | 0     | 0     | 0     | 0     | 0     | 0     | 0     | 0     | 0     | 0     | 0     | 0     | 0     | 0     | 0     | 0     | 0     | 0       | Mgat4d   |
| Mgat4e   | 0     | 1     | 0     | 0     | 3     | 0     | 2     | 5     | 2     | 10    | 2     | 2     | 0     | 1     | 3     | 2     | 7     | 2     | 0     | 2     | 4     | 5     | 4     | 4     | 3     | 3     | 2     | 2       | Mgat4e   |
| Mgat4f   | 1     | 0     | 0     | 2     | 0     | 0     | 1     | 1     | 0     | 1     | 0     | 0     | 0     | 0     | 1     | 0     | 0     | 0     | 0     | 0     | 0     | 0     | 0     | 2     | 0     | 1     | 0     | 1       | Mgat4f   |
| Mgat5    | 5413  | 5444  | 5471  | 7278  | 8852  | 7968  | 7672  | 5506  | 5782  | 6774  | 6130  | 5839  | 5781  | 5684  | 5740  | 5503  | 6601  | 7789  | 8286  | 7013  | 8018  | 7481  | 5203  | 5911  | 7526  | 4562  | 5691  | 5715    | Mgat5    |
| Mgat5b   | 1177  | 1764  | 1982  | 2753  | 4206  | 3057  | 2811  | 3495  | 4500  | 5763  | 4573  | 5229  | 3882  | 4342  | 1403  | 1279  | 2729  | 3098  | 3952  | 2568  | 3095  | 5765  | 3720  | 5216  | 6401  | 4438  | 4005  | 3993    | Mgat5b   |
| Mgl2     | 8     | 10    | 8     | 15    | 7     | 26    | 11    | 20    | 14    | 14    | 27    | 22    | 8     | 7     | 12    | 14    | 10    | 22    | 16    | 12    | 8     | 27    | 56    | 19    | 13    | 14    | 15    | 12      | Mgl2     |
| Mgll     | 305   | 329   | 240   | 358   | 539   | 392   | 477   | 331   | 615   | 542   | 692   | 237   | 269   | 268   | 282   | 379   | 316   | 533   | 593   | 411   | 493   | 488   | 653   | 425   | 520   | 289   | 216   | 204     | Mgll     |
| Mgme1    | 443   | 478   | 603   | 496   | 394   | 364   | 428   | 790   | 896   | 886   | 840   | 971   | 934   | 990   | 451   | 497   | 553   | 419   | 458   | 450   | 406   | 660   | 876   | 891   | 857   | 1086  | 1004  | 1015    | Mgme1    |
| Mgmt     | 189   | 213   | 142   | 139   | 97    | 127   | 69    | 220   | 227   | 181   | 200   | 178   | 203   | 138   | 164   | 213   | 123   | 157   | 98    | 116   | 73    | 140   | 269   | 163   | 157   | 238   | 192   | 150     | Mgmt     |
| Mgp      | 81    | 85    | 36    | 96    | 38    | 124   | 18    | 291   | 538   | 543   | 676   | 148   | 179   | 151   | 104   | 147   | 66    | 164   | 25    | 21    | 13    | 364   | 646   | 391   | 304   | 181   | 98    | 122     | Mgp      |
| Mgrn1    | 8586  | 10237 | 7968  | 8999  | 9607  | 9676  | 8480  | 6299  | 7795  | 7614  | 7241  | 7723  | 7324  | 6542  | 8068  | 9511  | 8785  | 9192  | 9552  | 8551  | 8759  | 8039  | 7522  | 6956  | 8030  | 6730  | 7234  | 6591    | Mgrn1    |
| Mgst1    | 991   | 777   | 859   | 644   | 812   | 752   | 800   | 1025  | 924   | 800   | 947   | 582   | 788   | 648   | 1135  | 1000  | 720   | 699   | 713   | 931   | 733   | 854   | 1186  | 624   | 615   | 755   | 572   | 685     | Mgst1    |
| Mgst2    | 12    | 6     | 11    | 35    | 12    | 5     | 7     | 12    | 35    | 6     | 68    | 9     | 12    | 15    | 7     | 19    | 13    | 24    | 6     | 8     | 16    | 23    | 20    | 17    | 4     | 11    | 17    | 9       | Mgst2    |
| Mgst3    | 1523  | 2249  | 1711  | 2114  | 1973  | 1762  | 1780  | 1252  | 1441  | 1277  | 1160  | 912   | 1215  | 1006  | 1816  | 2093  | 1861  | 2051  | 2017  | 2358  | 1866  | 1123  | 1425  | 1109  | 1239  | 1131  | 1137  | 1199    | Mgst3    |
| Mia      | 10    | 13    | 10    | 13    | 20    | 12    | 16    | 24    | 11    | 19    | 36    | 14    | 10    | 16    | 12    | 10    | 23    | 21    | 9     | 7     | 18    | 43    | 12    | 25    | 18    | 19    | 12    | 5       | Mia      |
| Mia2     | 5463  | 4958  | 4666  | 5279  | 4532  | 5040  | 5417  | 4822  | 4444  | 4156  | 4641  | 4737  | 4534  | 4821  | 5480  | 5054  | 4866  | 5163  | 4743  | 5162  | 5051  | 4014  | 4267  | 4322  | 4017  | 4491  | 4743  | 4671    | Mia2     |
| Mia3     | 11585 | 11048 | 11089 | 11975 | 11940 | 12252 | 12675 | 10147 | 10289 | 10566 | 11942 | 10642 | 10856 | 11276 | 11534 | 11552 | 11235 | 12328 | 11189 | 11166 | 12270 | 10450 | 10443 | 10717 | 10665 | 8826  | 10841 | 10291   | Mia3     |
| Mib1     | 19482 | 15513 | 21487 | 20069 | 18687 | 19619 | 20013 | 17443 | 14403 | 15308 | 16014 | 19287 | 19756 | 19918 | 19252 | 17644 | 20160 | 18284 | 18280 | 17700 | 19291 | 16599 | 14629 | 16476 | 17275 | 17172 | 20704 | 20924   | Mib1     |
| Mib2     | 3419  | 4349  | 4627  | 5169  | 4854  | 4248  | 3774  | 2689  | 3283  | 3282  | 3552  | 3145  | 2897  | 2744  | 3071  | 4028  | 5109  | 5060  | 5294  | 3925  | 4093  | 3568  | 3261  | 3929  | 3667  | 3240  | 3000  | 2595    | Mib2     |
| Mic1a1   | 1673  | 1767  | 2024  | 1535  | 1723  | 1788  | 1457  | 2495  | 3174  | 3220  | 2886  | 3484  | 3424  | 3336  | 1584  | 1688  | 1924  | 1436  | 1728  | 1519  | 1464  | 3043  | 3105  | 2999  | 4016  | 3890  | 3640  | Mic1a1  |          |
| Mic1a2   | 1252  | 1465  | 1215  | 1294  | 1217  | 1144  | 1055  | 441   | 555   | 584   | 737   | 451   | 400   | 405   | 1214  | 1618  | 1242  | 1416  | 1094  | 1015  | 1186  | 481   | 794   | 689   | 440   | 610   | 389   | 389     | Mic1a2   |
| Mic1a3   | 5762  | 7115  | 7703  | 9015  | 9370  | 7705  | 7049  | 4400  | 5359  | 6457  | 5949  | 5133  | 4442  | 4683  | 5569  | 6962  | 8377  | 9235  | 8398  | 6123  | 7994  | 7199  | 4812  | 5495  | 6758  | 3613  | 4309  | 4265    | Mic1a3   |
| Mic1a11  | 3136  | 3173  | 3969  | 3391  | 4815  | 3967  | 3419  | 4169  | 4660  | 5508  | 5397  | 5063  | 5169  | 4508  | 2967  | 3505  | 4066  | 3960  | 4347  | 3300  | 3600  | 5713  | 4855  | 5167  | 5144  | 3833  | 4578  | 4570    | Mic1a11  |
| Mic1a21  | 1479  | 1962  | 1903  | 2026  | 1631  | 1632  | 1196  | 670   | 860   | 842   | 807   | 817   | 949   | 683   | 1611  | 2012  | 1883  | 1971  | 1581  | 1376  | 1421  | 937   | 806   | 847   | 936   | 736   | 806   | Mic1a21 |          |
| Micos10  | 5700  | 5379  | 7017  | 6616  | 5974  | 5539  | 6698  | 5040  | 4666  | 5110  | 5331  | 5070  | 5184  | 5629  | 5662  | 5185  | 6285  | 6121  | 5908  | 6902  | 6244  | 4326  | 4799  | 5741  | 5363  | 6379  | 5700  | 5982    | Micos10  |
| Micos13  | 2429  | 2747  | 2771  | 2722  | 2480  | 2666  | 2563  | 2334  | 2576  | 2391  | 2815  | 2509  | 2894  | 2860  | 2407  | 2436  | 2843  | 2652  | 2766  | 3316  | 2565  | 1947  | 2791  | 2989  | 2793  | 3142  | 2861  | 2872    | Micos13  |
| Micu1    | 6880  | 7763  | 7161  | 7447  | 6472  | 6566  | 7062  | 3886  | 3929  | 3593  | 3923  | 3610  | 3535  | 3911  | 7221  | 6953  | 7106  | 6974  | 7208  | 6852  | 7357  | 3559  | 4347  | 3528  | 3544  | 4002  | 3871  | 3875    | Micu1    |
| Micu2    | 2834  | 2262  | 2612  | 2149  | 2170  | 2343  | 2342  | 5482  | 5029  | 4857  | 4998  | 4975  | 4925  | 5020  | 2782  | 2602  | 2218  | 2035  | 2124  | 2551  | 2203  | 4779  | 5410  | 4805  | 4436  | 5664  | 5016  | 5077    | Micu2    |
| Micu3    | 1735  | 1319  | 1606  | 2127  | 2389  | 2232  | 2466  | 2787  | 2090  | 2159  | 2197  | 2071  | 2210  | 2415  | 2094  | 1587  | 1805  | 2211  | 2006  | 2355  | 2431  | 2923  | 2357  | 2093  | 2543  | 1926  | 2097  | 2307    | Micu3    |
| Mid1     | 2474  | 3446  | 3749  | 3723  | 2213  | 3586  | 4697  | 2296  | 2565  | 3429  | 2074  | 6442  | 4132  | 4457  | 3132  | 2780  | 5699  | 3323  | 3782  | 3262  | 4417  | 4926  | 3476  | 5011  | 4808  | 4577  | 5626  | 5872    | Mid1     |
| Mid1p1   | 1600  | 2204  | 2268  | 2395  | 2709  | 2091  | 2121  | 1867  | 2344  | 2346  | 2200  | 2451  | 2258  | 2447  | 1751  | 1818  | 2597  | 2362  | 2579  | 2253  | 2257  | 2226  | 2210  | 2525  | 2476  | 2829  | 2305  | 2218    | Mid1p1   |
| Mid2     | 1166  | 953   | 1007  | 1044  | 1555  | 1216  | 1083  | 1404  | 1523  | 1448  | 1633  | 925   | 1329  | 939   | 1271  | 1172  | 1145  | 1053  | 1160  | 1323  | 1176  | 1703  | 1572  | 1065  | 1241  | 812   | 1031  | 1046    | Mid2     |
| Mideas   | 3091  | 3006  | 3742  | 3915  | 3790  | 3566  | 3513  | 2216  | 2497  | 2722  | 2974  | 2913  | 2734  | 2991  | 2598  | 3052  | 3854  | 3879  | 3769  | 2973  | 3764  | 2379  | 2436  | 2978  | 2641  | 2666  | 2611  | 2957    | Mideas   |
| Midn     | 7237  | 9626  | 12673 | 11639 | 11736 | 9618  | 9089  | 14831 | 16360 | 21375 | 18522 | 24186 | 18861 | 22488 | 6939  | 7994  | 12808 | 10881 | 12709 | 8163  | 9818  | 20128 | 14843 | 24511 | 22569 |       |       |         |          |

|          |       |       |       |       |       |       |       |       |       |       |       |       |       |       |       |       |       |       |       |       |       |       |       |       |       |       |       |       |          |       |
|----------|-------|-------|-------|-------|-------|-------|-------|-------|-------|-------|-------|-------|-------|-------|-------|-------|-------|-------|-------|-------|-------|-------|-------|-------|-------|-------|-------|-------|----------|-------|
| Mis18bp1 | 5914  | 3947  | 4975  | 3542  | 3026  | 3931  | 4323  | 5820  | 5144  | 4454  | 3858  | 6518  | 5704  | 6803  | 5600  | 4609  | 4252  | 3290  | 3744  | 4768  | 3968  | 3452  | 4282  | 4957  | 4628  | 6925  | 7028  | 6748  | Mis18bp1 |       |
| Misp     | 174   | 306   | 333   | 452   | 510   | 337   | 322   | 140   | 130   | 176   | 149   | 65    | 95    | 62    | 182   | 341   | 431   | 569   | 507   | 331   | 366   | 164   | 159   | 176   | 100   | 149   | 52    | 69    | Misp     |       |
| Misp3    | 28    | 31    | 31    | 22    | 23    | 31    | 20    | 2     | 4     | 3     | 3     | 1     | 1     | 0     | 28    | 25    | 46    | 10    | 23    | 35    | 20    | 0     | 6     | 2     | 3     | 0     | 3     | 2     | Misp3    |       |
| Mitd1    | 1073  | 874   | 1027  | 1067  | 907   | 995   | 1076  | 1117  | 977   | 1036  | 977   | 1046  | 1082  | 1113  | 1112  | 1093  | 1080  | 894   | 940   | 1253  | 965   | 914   | 992   | 1008  | 927   | 1175  | 990   | 1076  | Mitd1    |       |
| Mitf     | 759   | 617   | 700   | 808   | 646   | 655   | 735   | 348   | 388   | 254   | 414   | 256   | 290   | 258   | 831   | 761   | 749   | 876   | 622   | 633   | 715   | 304   | 495   | 313   | 265   | 267   | 218   | 262   | Mitf     |       |
| Mix1     | 3     | 4     | 8     | 1     | 6     | 3     | 4     | 1     | 1     | 0     | 6     | 0     | 2     | 0     | 8     | 7     | 0     | 4     | 3     | 0     | 1     | 5     | 1     | 1     | 1     | 0     | 6     | 1     | Mix1     |       |
| Mix67    | 47566 | 37961 | 29125 | 26433 | 22669 | 30608 | 29536 | 50570 | 46035 | 37954 | 34774 | 52982 | 45329 | 50005 | 41190 | 35829 | 27409 | 22663 | 26651 | 34887 | 27907 | 26533 | 38520 | 37750 | 38235 | 42084 | 58804 | 46520 | Mix67    |       |
| Mkks     | 762   | 790   | 692   | 795   | 707   | 603   | 720   | 902   | 807   | 693   | 666   | 634   | 677   | 656   | 822   | 842   | 677   | 743   | 700   | 801   | 701   | 805   | 814   | 634   | 714   | 682   | 661   | 653   | Mkks     |       |
| Mkkn1    | 10967 | 9072  | 8201  | 9310  | 9655  | 10467 | 10969 | 11241 | 9657  | 8273  | 8519  | 9130  | 8960  | 9545  | 10897 | 9976  | 8485  | 8890  | 9204  | 11223 | 10745 | 9249  | 9176  | 7899  | 8791  | 8108  | 9706  | 9304  | Mkkn1    |       |
| Mkkn1    | 4120  | 5003  | 4611  | 4695  | 3878  | 4141  | 4161  | 1882  | 1922  | 2140  | 2257  | 2026  | 2015  | 1970  | 4209  | 4619  | 4616  | 4809  | 4320  | 4004  | 4467  | 1967  | 2106  | 1992  | 1950  | 1721  | 2128  | 2066  | Mkkn1    |       |
| Mkkn2    | 10770 | 14158 | 11039 | 11646 | 8067  | 8888  | 7868  | 5098  | 6015  | 5715  | 6134  | 6430  | 6095  | 5627  | 9816  | 13126 | 10987 | 11606 | 8425  | 7783  | 8197  | 5738  | 5978  | 6293  | 5867  | 7238  | 5917  | 5708  | Mkkn2    |       |
| Mkkn1    | 6503  | 7471  | 7914  | 9586  | 11864 | 9750  | 10384 | 11617 | 10528 | 13039 | 10187 | 11473 | 10459 | 11217 | 7791  | 5992  | 9500  | 9481  | 11642 | 10358 | 10786 | 14058 | 10383 | 12477 | 13936 | 9935  | 10867 | 10846 | Mkkn1    |       |
| Mkkn2    | 2712  | 2709  | 2209  | 2464  | 2836  | 2769  | 3109  | 2883  | 2974  | 2612  | 2564  | 2474  | 2533  | 2746  | 2891  | 2435  | 2487  | 2749  | 2731  | 2979  | 3044  | 2801  | 2910  | 2612  | 2665  | 2634  | 2558  | 2567  | Mkkn2    |       |
| Mkkn2os  | 10    | 2     | 1     | 2     | 3     | 3     | 0     | 11    | 7     | 9     | 16    | 0     | 4     | 5     | 2     | 2     | 4     | 0     | 2     | 1     | 0     | 8     | 19    | 0     | 7     | 0     | 1     | 0     | Mkkn2os  |       |
| Mkkn3    | 1222  | 1190  | 1465  | 1509  | 1276  | 1240  | 1380  | 1342  | 1057  | 1103  | 970   | 1502  | 1176  | 1502  | 1352  | 1045  | 1371  | 1312  | 1410  | 1442  | 1246  | 1340  | 1120  | 1137  | 1419  | 1399  | 1535  | 1460  | Mkkn3    |       |
| Mks1     | 592   | 604   | 778   | 604   | 727   | 717   | 724   | 1139  | 1287  | 1323  | 1373  | 1510  | 1479  | 1531  | 559   | 608   | 864   | 559   | 759   | 628   | 649   | 1310  | 1251  | 1405  | 1238  | 1452  | 1481  | 1495  | Mks1     |       |
| Mkx      | 963   | 813   | 1113  | 751   | 515   | 643   | 401   | 449   | 520   | 480   | 580   | 431   | 634   | 490   | 878   | 1068  | 694   | 733   | 444   | 481   | 374   | 491   | 734   | 409   | 428   | 691   | 466   | 529   | Mkx      |       |
| Mlana    | 1     | 2     | 1     | 0     | 0     | 0     | 0     | 7     | 9     | 8     | 11    | 7     | 3     | 6     | 7     | 4     | 3     | 0     | 2     | 0     | 0     | 3     | 13    | 7     | 0     | 3     | 6     | 5     | Mlana    |       |
| Mlc1     | 180   | 219   | 215   | 283   | 415   | 346   | 350   | 818   | 967   | 858   | 674   | 1023  | 586   | 1037  | 231   | 160   | 263   | 276   | 408   | 412   | 364   | 708   | 902   | 997   | 1133  | 1190  | 890   | 890   | Mlc1     |       |
| Mlec     | 32766 | 32920 | 32564 | 27943 | 22826 | 25276 | 23648 | 17088 | 20018 | 19185 | 23329 | 19020 | 20742 | 17689 | 28887 | 33597 | 29722 | 29915 | 24849 | 21426 | 23213 | 17157 | 21333 | 19269 | 17121 | 17608 | 19758 | 19170 | Mlec     |       |
| Mf1      | 1450  | 1373  | 1213  | 1120  | 1016  | 919   | 1000  | 858   | 734   | 588   | 512   | 755   | 890   | 620   | 1551  | 1558  | 1194  | 1015  | 974   | 1297  | 977   | 715   | 898   | 598   | 591   | 713   | 585   | 687   | Mf1      |       |
| Mf2      | 12964 | 16505 | 15798 | 17465 | 15852 | 14664 | 14984 | 10343 | 11623 | 12962 | 12528 | 13044 | 11997 | 13178 | 12547 | 13618 | 18004 | 16687 | 17927 | 14460 | 16232 | 11991 | 11809 | 13924 | 12959 | 14283 | 12745 | 12720 | Mf2      |       |
| Mh1      | 2110  | 1978  | 1929  | 1632  | 1537  | 1823  | 1790  | 2820  | 2605  | 2470  | 2301  | 2942  | 2764  | 2943  | 2047  | 1987  | 1767  | 1484  | 1575  | 1927  | 1585  | 2351  | 2611  | 2523  | 2476  | 3053  | 3199  | 3145  | Mh1      |       |
| Mh3      | 1390  | 1213  | 1104  | 1191  | 1327  | 1393  | 1377  | 2540  | 2469  | 2271  | 2115  | 2102  | 2224  | 2156  | 1452  | 1261  | 1233  | 1287  | 1261  | 1412  | 1395  | 1983  | 2355  | 2051  | 2167  | 1659  | 2230  | 2158  | Mh3      |       |
| Mlip     | 14    | 6     | 9     | 16    | 20    | 26    | 22    | 18    | 15    | 32    | 32    | 14    | 11    | 7     | 5     | 11    | 9     | 7     | 24    | 10    | 17    | 17    | 32    | 28    | 24    | 21    | 3     | 5     | Mlip     |       |
| Mkl      | 51    | 28    | 61    | 49    | 33    | 60    | 21    | 28    | 24    | 33    | 21    | 7     | 14    | 15    | 30    | 34    | 30    | 36    | 30    | 41    | 39    | 18    | 32    | 14    | 21    | 26    | 20    | 23    | Mkl      |       |
| Mkl1     | 7892  | 10496 | 10346 | 10836 | 9839  | 9092  | 8697  | 6988  | 8973  | 9539  | 8904  | 10453 | 8528  | 9390  | 7229  | 8663  | 10819 | 10225 | 11610 | 7828  | 9731  | 8976  | 8220  | 9897  | 9608  | 11040 | 8668  | 9374  | Mkl1     |       |
| Mkl10    | 4803  | 4342  | 4416  | 4322  | 4517  | 4673  | 4920  | 6909  | 5996  | 6410  | 6032  | 7315  | 7011  | 7342  | 4766  | 4029  | 4269  | 4439  | 4698  | 4423  | 4673  | 6390  | 5861  | 6643  | 6566  | 6592  | 7653  | 7328  | Mkl10    |       |
| Mkl11    | 8387  | 8596  | 7202  | 11872 | 17965 | 14400 | 17150 | 24380 | 19263 | 20906 | 17466 | 16778 | 15547 | 19505 | 11780 | 7572  | 10440 | 13116 | 14668 | 16955 | 17671 | 26520 | 18281 | 19331 | 7572  | 23880 | 15338 | 16063 | 17879    | Mkl11 |
| Mkl3     | 6132  | 5047  | 5517  | 5816  | 6944  | 6454  | 7011  | 10601 | 9773  | 9689  | 8260  | 9090  | 8761  | 9142  | 6326  | 5103  | 5625  | 5853  | 6844  | 7507  | 7121  | 9962  | 9401  | 9562  | 10506 | 7949  | 9139  | 8866  | Mkl3     |       |
| Mkl6     | 6487  | 7589  | 10637 | 10745 | 11515 | 9971  | 9434  | 8425  | 8843  | 11516 | 10595 | 10637 | 10656 | 10152 | 6248  | 6731  | 11192 | 11088 | 12405 | 8779  | 10162 | 10881 | 8060  | 12361 | 12020 | 10389 | 9797  | 10301 | Mkl6     |       |
| Mlph     | 53    | 50    | 56    | 49    | 16    | 47    | 28    | 60    | 69    | 70    | 87    | 72    | 79    | 57    | 46    | 81    | 44    | 65    | 26    | 28    | 19    | 45    | 80    | 75    | 41    | 35    | 48    | 55    | Mlph     |       |
| Mlst8    | 1118  | 1209  | 1281  | 1147  | 1454  | 1408  | 1211  | 3043  | 3479  | 3240  | 3126  | 3712  | 3474  | 3516  | 1150  | 1018  | 1292  | 1075  | 1426  | 1283  | 1205  | 3322  | 3130  | 3474  | 3608  | 3869  | 3825  | 3824  | Mlst8    |       |
| Mlx      | 2062  | 2513  | 1996  | 2313  | 2142  | 1914  | 2302  | 2253  | 2008  | 1861  | 1812  | 1816  | 1803  | 1870  | 2300  | 2083  | 2067  | 2287  | 2067  | 2242  | 2237  | 2104  | 2114  | 2001  | 2049  | 1918  | 1743  | 1834  | Mlx      |       |
| Mlxip    | 11844 | 12836 | 12450 | 16009 | 13574 | 13130 | 13614 | 5620  | 5668  | 6813  | 6421  | 7151  | 6549  | 6564  | 11058 | 12907 | 14303 | 15472 | 14303 | 10581 | 13563 | 7285  | 7048  | 7660  | 5497  | 6694  | 6566  | Mlxip |          |       |
| Mlxip1   | 910   | 971   | 1189  | 972   | 602   | 686   | 685   | 149   | 178   | 229   | 178   | 202   | 187   | 198   | 707   | 1038  | 1030  | 858   | 743   | 601   | 603   | 147   | 160   | 256   | 160   | 351   | 192   | 227   | Mlxip1   |       |
| Mlycd    | 866   | 1191  | 961   | 1014  | 1040  | 882   | 868   | 723   | 882   | 739   | 788   | 828   | 790   | 759   | 907   | 956   | 1198  | 946   | 946   | 930   | 928   | 715   | 935   | 858   | 831   | 916   | 761   | 757   | Mlycd    |       |
| Mmaa     | 1250  | 1283  | 1082  | 1736  | 1592  | 1591  | 1888  | 1955  | 1914  | 1898  | 1747  | 1755  | 1640  | 1775  | 1336  | 1162  | 1402  | 1700  | 1527  | 1652  | 1690  | 2064  | 1930  | 1942  | 1893  | 1704  | 1667  | 1544  | Mmaa     |       |
| Mmab     | 962   | 1158  | 1152  | 1039  | 992   | 1060  | 884   | 1559  | 1965  | 1956  | 2010  | 2044  | 1968  | 1868  | 955   | 1114  | 1270  | 1061  | 1057  | 874   | 869   | 1768  | 2003  | 1959  | 1832  | 2125  | 2076  | 1909  | Mmab     |       |
| Mmachc   | 1204  | 1127  | 1323  | 1061  | 957   | 1017  | 991   | 1827  | 1619  | 1547  | 1480  | 2110  | 1816  | 2059  | 1213  | 1079  | 1274  | 865   | 1054  | 1220  | 973   | 1544  | 1703  | 1734  | 1756  | 2360  | 1994  | 2250  | Mmachc   |       |
| Mmachc   | 4665  | 4686  | 4468  | 3914  | 3537  | 3607  | 3924  | 4680  | 4247  | 3940  | 3875  | 4419  | 4383  | 4749  | 5077  | 4350  | 4562  | 3865  | 3735  | 4116  | 3815  | 3984  | 4285  | 4330  | 4026  | 4971  | 4817  | 4911  | Mmachc   |       |
| Mmd      | 6819  | 5223  | 6584  | 7873  | 8498  | 7370  | 8917  | 5461  | 4342  | 5680  | 4684  | 4708  | 4611  | 5106  | 7089  | 5856  | 7436  | 8029  | 8182  | 7311  | 9228  | 6630  | 4798  | 5079  | 5601  | 4568  | 4131  | 5071  | Mmd      |       |
| Mmd2     | 929   | 989   | 639   | 1386  | 2277  | 1892  | 2293  | 2234  | 2286  | 1987  | 1808  | 1404  | 1457  | 1693  | 1269  | 868   | 1081  | 1788  | 2175  | 2282  | 2346  | 2296  | 2180  | 2031  | 2558  | 1531  | 1364  | 1542  | Mmd2     |       |
| Mme      | 4334  | 2684  | 2759  | 1533  | 797   | 2080  | 523   | 4898  | 7321  | 5051  | 6681  | 3279  | 5213  | 3164  | 3869  | 4703  | 1744  | 1607  | 718   | 867   | 479   | 3628  | 6805  | 3876  | 2675  | 3275  | 3475  | 3146  | Mme      |       |
| Mme1     | 17    | 30    | 28    | 25    | 21    | 22    | 19    | 23    | 18    | 5     | 33    | 26    | 31    | 12    | 32    | 29    | 22    | 25    | 20    | 22    | 13    | 12    | 16    | 20    | 23    | 34    | 27    | 27    | Mme1     |       |
| Mmgt1    | 7882  | 6626  | 6980  | 7376  | 7773  | 7651  | 8786  | 9365  | 7456  | 7055  | 6589  | 7658  | 7184  | 8151  | 8418  | 7044  | 6906  | 7264  | 7439  | 8589  | 8549  | 7807  | 7219  | 6995  | 7628  | 7170  | 7483  | 8246  | Mmgt1    |       |
| Mmgt2    | 905   | 866   | 944   | 877   | 935   | 760   | 831   | 1186  | 1204  | 1086  | 1186  | 1107  | 1160  | 1228  | 944   | 899   | 829   | 747   | 835   | 929   | 849   | 966   | 1271  | 1269  | 940   | 1642  | 1328  | 1304  | Mmgt2    |       |
| Mmp10    | 0     | 0     | 0     | 0     | 2     | 0     | 0     | 0     | 0     | 0     | 1     | 0     | 0     | 0     | 0     | 0     | 0     | 0     | 0     | 0     | 0     | 0     | 0     | 0     | 0     | 1     | 0     | 0     | Mmp10    |       |
| Mmp11    | 2209  | 2142  | 2007  |       |       |       |       |       |       |       |       |       |       |       |       |       |       |       |       |       |       |       |       |       |       |       |       |       |          |       |



|           |       |       |       |       |       |       |       |       |       |       |       |       |       |       |       |       |       |       |       |       |       |       |       |       |       |       |       |       |           |
|-----------|-------|-------|-------|-------|-------|-------|-------|-------|-------|-------|-------|-------|-------|-------|-------|-------|-------|-------|-------|-------|-------|-------|-------|-------|-------|-------|-------|-------|-----------|
| Moap1     | 1     | 3     | 5     | 7     | 2     | 1     | 2     | 0     | 0     | 2     | 3     | 5     | 5     | 0     | 4     | 4     | 3     | 0     | 2     | 1     | 1     | 8     | 3     | 1     | 1     | 5     | 0     | 9     | Moap1     |
| Mob1a     | 13432 | 11238 | 11043 | 8975  | 7206  | 8733  | 8990  | 9716  | 8967  | 7352  | 8523  | 9067  | 8981  | 8995  | 12092 | 12213 | 9798  | 9239  | 7930  | 9658  | 8476  | 7855  | 9455  | 8274  | 7625  | 9519  | 9460  | 9608  | Mob1a     |
| Mob1b     | 6422  | 4400  | 6029  | 5918  | 5767  | 6586  | 6832  | 4949  | 4508  | 4465  | 5011  | 5564  | 5361  | 5739  | 5983  | 5909  | 6000  | 6070  | 5626  | 5787  | 6573  | 5280  | 4365  | 5018  | 5268  | 5454  | 5545  | 5835  | Mob1b     |
| Mob2      | 2173  | 2452  | 1929  | 2228  | 1913  | 2011  | 1986  | 1533  | 1695  | 1431  | 1486  | 1554  | 1397  | 1481  | 2205  | 2301  | 2045  | 2144  | 1975  | 2273  | 2015  | 1425  | 1614  | 1487  | 1488  | 1633  | 1576  | 1448  | Mob2      |
| Mob3a     | 4651  | 6207  | 4494  | 4471  | 3624  | 4267  | 3406  | 2616  | 2871  | 2818  | 2864  | 3060  | 3071  | 2748  | 4531  | 5568  | 4444  | 4512  | 4150  | 4036  | 3653  | 2842  | 3021  | 2817  | 2655  | 3060  | 3109  | 3119  | Mob3a     |
| Mob3b     | 896   | 879   | 1353  | 975   | 868   | 835   | 865   | 840   | 811   | 954   | 715   | 1388  | 1489  | 1431  | 1005  | 857   | 1276  | 809   | 923   | 856   | 875   | 785   | 737   | 1150  | 839   | 1542  | 1603  | 1641  | Mob3b     |
| Mob3c     | 329   | 287   | 383   | 366   | 358   | 398   | 294   | 429   | 474   | 541   | 559   | 496   | 595   | 469   | 262   | 294   | 346   | 377   | 302   | 309   | 280   | 578   | 503   | 532   | 533   | 567   | 467   | 523   | Mob3c     |
| Mob4      | 6687  | 4884  | 6729  | 6833  | 6562  | 6686  | 7517  | 8448  | 6908  | 6913  | 6961  | 7484  | 7094  | 8087  | 7239  | 6234  | 6363  | 6655  | 6505  | 7172  | 6886  | 8024  | 7420  | 7453  | 7555  | 8072  | 7262  | 8043  | Mob4      |
| Mobp      | 20    | 12    | 12    | 9     | 6     | 13    | 8     | 17    | 23    | 10    | 13    | 43    | 0     | 36    | 21    | 14    | 16    | 8     | 8     | 5     | 11    | 12    | 8     | 20    | 25    | 65    | 29    | 42    | Mobp      |
| Mocos     | 32    | 18    | 33    | 7     | 17    | 30    | 8     | 28    | 31    | 59    | 41    | 2     | 11    | 6     | 29    | 34    | 10    | 40    | 14    | 26    | 19    | 5     | 55    | 32    | 10    | 24    | 1     | 5     | Mocos     |
| Mocs1     | 662   | 775   | 681   | 656   | 793   | 802   | 612   | 678   | 801   | 800   | 834   | 881   | 906   | 786   | 591   | 688   | 739   | 666   | 654   | 723   | 634   | 702   | 837   | 911   | 793   | 981   | 809   | 764   | Mocs1     |
| Mocs2     | 5685  | 5217  | 5588  | 5741  | 4852  | 4747  | 5566  | 3922  | 3385  | 3253  | 3396  | 3335  | 3035  | 3356  | 5972  | 5553  | 5399  | 5317  | 5186  | 6385  | 5239  | 3180  | 3361  | 3510  | 3384  | 3741  | 3424  | 3563  | Mocs2     |
| Mocs3     | 615   | 619   | 578   | 682   | 652   | 613   | 582   | 462   | 485   | 465   | 520   | 522   | 536   | 484   | 550   | 640   | 681   | 747   | 645   | 552   | 636   | 449   | 484   | 549   | 470   | 479   | 506   | 522   | Mocs3     |
| Mog       | 3     | 3     | 2     | 4     | 11    | 0     | 0     | 0     | 0     | 2     | 0     | 3     | 2     | 0     | 1     | 1     | 8     | 6     | 4     | 0     | 3     | 0     | 0     | 6     | 2     | 0     | 2     | 0     | Mog       |
| Mogat1    | 9     | 6     | 0     | 0     | 0     | 0     | 1     | 2     | 7     | 16    | 11    | 7     | 3     | 5     | 7     | 7     | 0     | 0     | 1     | 1     | 3     | 2     | 10    | 7     | 4     | 6     | 0     | 12    | Mogat1    |
| Mogat2    | 311   | 402   | 480   | 255   | 208   | 197   | 196   | 101   | 127   | 119   | 88    | 147   | 198   | 115   | 351   | 502   | 308   | 217   | 149   | 230   | 182   | 95    | 146   | 128   | 120   | 183   | 209   | 206   | Mogat2    |
| Mogs      | 2974  | 3807  | 3505  | 3203  | 2626  | 2486  | 2486  | 2235  | 2764  | 2612  | 2774  | 2757  | 2654  | 2413  | 2722  | 3544  | 3472  | 3026  | 2987  | 2588  | 2389  | 2308  | 2815  | 2689  | 2393  | 3314  | 2452  | 2511  | Mogs      |
| Mok       | 873   | 1176  | 792   | 1019  | 976   | 911   | 929   | 524   | 565   | 592   | 542   | 677   | 575   | 557   | 936   | 977   | 1080  | 958   | 1031  | 1051  | 976   | 617   | 564   | 527   | 617   | 540   | 538   | 498   | Mok       |
| Mon1a     | 549   | 790   | 758   | 759   | 945   | 845   | 710   | 981   | 976   | 1115  | 979   | 982   | 923   | 1011  | 667   | 684   | 811   | 724   | 1015  | 714   | 844   | 1081  | 971   | 1072  | 1246  | 1076  | 1117  | 1062  | Mon1a     |
| Mon1b     | 2533  | 3073  | 3388  | 3976  | 3562  | 3028  | 3581  | 2180  | 2198  | 2660  | 2172  | 2684  | 2470  | 2694  | 2649  | 2714  | 3585  | 3836  | 3673  | 2754  | 3750  | 2565  | 2135  | 2740  | 2777  | 2512  | 2352  | 2706  | Mon1b     |
| Mon2      | 11610 | 11302 | 8226  | 10634 | 10424 | 11151 | 11107 | 8348  | 8730  | 8032  | 9024  | 7895  | 7952  | 8185  | 11305 | 11247 | 9079  | 10796 | 9831  | 10016 | 11657 | 8457  | 8501  | 7277  | 8682  | 5999  | 7961  | 7692  | Mon2      |
| Morc1     | 1     | 3     | 0     | 6     | 3     | 1     | 2     | 6     | 7     | 9     | 3     | 1     | 3     | 3     | 9     | 3     | 9     | 5     | 1     | 1     | 1     | 5     | 6     | 1     | 0     | 0     | 6     | 11    | Morc1     |
| Morc2a    | 12129 | 11747 | 11968 | 14015 | 13255 | 13439 | 13641 | 11295 | 10785 | 11937 | 11651 | 12509 | 11456 | 12153 | 11719 | 11279 | 12311 | 13682 | 13333 | 11151 | 13974 | 12644 | 10255 | 11745 | 12893 | 10205 | 11900 | 11614 | Morc2a    |
| Morc2b    | 33    | 42    | 15    | 62    | 56    | 30    | 55    | 12    | 16    | 13    | 25    | 9     | 7     | 7     | 49    | 35    | 27    | 52    | 60    | 32    | 49    | 25    | 17    | 20    | 13    | 7     | 6     | 8     | Morc2b    |
| Morc3     | 3459  | 3017  | 3025  | 3254  | 3340  | 3343  | 3386  | 4689  | 4210  | 3960  | 4206  | 4278  | 3821  | 4217  | 3491  | 3127  | 3330  | 3130  | 3225  | 3698  | 3250  | 4370  | 4212  | 3935  | 4222  | 3846  | 4194  | 4111  | Morc3     |
| Morc4     | 2290  | 1788  | 1892  | 1619  | 1490  | 1574  | 1421  | 1154  | 1266  | 993   | 1546  | 991   | 1133  | 1022  | 2069  | 2200  | 1603  | 1545  | 1307  | 1393  | 1333  | 1108  | 1276  | 1105  | 961   | 1022  | 1033  | 1123  | Morc4     |
| Morf41    | 15441 | 16035 | 18597 | 15786 | 15552 | 15517 | 16689 | 23395 | 22883 | 21774 | 21450 | 23500 | 23098 | 25357 | 16634 | 15776 | 17216 | 14835 | 16056 | 18936 | 15826 | 21012 | 24390 | 23684 | 22388 | 26231 | 25763 | 26798 | Morf41    |
| Morf42    | 35696 | 33640 | 35513 | 33567 | 30633 | 32178 | 34797 | 36009 | 34959 | 30162 | 32228 | 32583 | 30938 | 34629 | 38133 | 33364 | 34762 | 32424 | 32433 | 39147 | 33797 | 30878 | 35485 | 33315 | 31781 | 37271 | 33792 | 35081 | Morf42    |
| Morn1     | 870   | 963   | 683   | 1028  | 880   | 838   | 924   | 289   | 395   | 359   | 381   | 375   | 416   | 391   | 831   | 860   | 844   | 925   | 864   | 880   | 886   | 359   | 402   | 328   | 450   | 384   | 431   | 377   | Morn1     |
| Morn2     | 405   | 438   | 475   | 468   | 470   | 392   | 591   | 504   | 461   | 470   | 494   | 554   | 468   | 691   | 400   | 373   | 454   | 406   | 460   | 575   | 584   | 399   | 475   | 546   | 536   | 527   | 531   | 612   | Morn2     |
| Morn3     | 0     | 5     | 6     | 5     | 9     | 11    | 9     | 18    | 23    | 32    | 8     | 25    | 22    | 5     | 5     | 18    | 8     | 1     | 14    | 6     | 10    | 22    | 17    | 19    | 5     | 15    | 24    | 11    | Morn3     |
| Morn4     | 3081  | 3834  | 3991  | 4852  | 4969  | 4541  | 4522  | 3510  | 3808  | 4371  | 3742  | 4800  | 3933  | 4724  | 3219  | 3121  | 4341  | 4731  | 4881  | 4307  | 4740  | 4634  | 3489  | 4498  | 5107  | 4454  | 4172  | 4230  | Morn4     |
| Morn5     | 18    | 18    | 13    | 20    | 21    | 13    | 17    | 16    | 21    | 12    | 11    | 12    | 27    | 18    | 25    | 23    | 27    | 12    | 19    | 23    | 40    | 23    | 35    | 12    | 23    | 18    | 9     | 13    | Morn5     |
| Mos       | 21    | 16    | 17    | 27    | 25    | 19    | 9     | 22    | 21    | 20    | 19    | 29    | 32    | 24    | 26    | 18    | 16    | 17    | 26    | 23    | 25    | 18    | 16    | 18    | 9     | 30    | 27    | 13    | Mos       |
| Mosmo     | 5472  | 4210  | 5181  | 5752  | 5102  | 5583  | 5906  | 5311  | 4367  | 4433  | 5046  | 5153  | 4945  | 5302  | 5404  | 4784  | 5109  | 5543  | 5293  | 5158  | 5691  | 5182  | 4370  | 4799  | 5397  | 4733  | 5488  | 5255  | Mosmo     |
| Mospd1    | 3102  | 2602  | 2941  | 2734  | 2831  | 2699  | 3226  | 3497  | 2684  | 2228  | 2977  | 2590  | 2879  | 3059  | 3690  | 3044  | 2730  | 2903  | 2696  | 3574  | 2883  | 3056  | 2910  | 2410  | 2555  | 2791  | 2941  | 3201  | Mospd1    |
| Mospd2    | 3485  | 2729  | 2622  | 2801  | 2761  | 2958  | 3181  | 2759  | 2388  | 1891  | 2252  | 2230  | 2337  | 2347  | 3775  | 3417  | 2561  | 2956  | 2554  | 3336  | 2926  | 2431  | 2359  | 2139  | 2153  | 2058  | 2458  | 2365  | Mospd2    |
| Mospd3    | 1137  | 1432  | 1247  | 1683  | 1508  | 1330  | 1294  | 934   | 1121  | 1285  | 1210  | 1218  | 1038  | 1047  | 1030  | 1308  | 1549  | 1710  | 1584  | 1243  | 1405  | 1303  | 1014  | 1222  | 1321  | 1220  | 874   | 1057  | Mospd3    |
| Mov10     | 964   | 1038  | 1201  | 781   | 766   | 850   | 621   | 1191  | 1665  | 1609  | 1995  | 1302  | 1695  | 1138  | 836   | 1192  | 1002  | 796   | 749   | 520   | 587   | 1377  | 1885  | 1660  | 1017  | 1947  | 1307  | 1208  | Mov10     |
| Mov101    | 0     | 0     | 0     | 0     | 1     | 0     | 2     | 0     | 0     | 0     | 6     | 0     | 3     | 0     | 0     | 0     | 0     | 0     | 0     | 0     | 1     | 0     | 4     | 0     | 0     | 0     | 1     | 0     | Mov101    |
| Moxd1     | 1067  | 709   | 538   | 354   | 495   | 376   | 152   | 662   | 966   | 855   | 1355  | 269   | 555   | 155   | 981   | 1458  | 338   | 456   | 219   | 202   | 201   | 690   | 1176  | 645   | 286   | 695   | 252   | 171   | Moxd1     |
| Mpc1      | 1456  | 1466  | 1235  | 1513  | 1567  | 1765  | 1796  | 1326  | 1215  | 1154  | 1271  | 1108  | 1055  | 1053  | 1542  | 1530  | 1322  | 1808  | 1626  | 1851  | 1849  | 1313  | 1315  | 1135  | 1455  | 987   | 1138  | 894   | Mpc1      |
| Mpc2      | 2136  | 2050  | 2097  | 2497  | 2302  | 2054  | 2924  | 1909  | 1606  | 2103  | 1883  | 1660  | 1791  | 2008  | 2310  | 1872  | 2421  | 2444  | 2274  | 2691  | 2691  | 1876  | 1763  | 1995  | 2006  | 1661  | 1644  | 1915  | Mpc2      |
| Mpdu1     | 1388  | 1454  | 1664  | 1509  | 1631  | 1737  | 1599  | 3031  | 3138  | 3121  | 3067  | 3673  | 3504  | 3537  | 1383  | 1302  | 1604  | 1479  | 1776  | 1724  | 1642  | 3019  | 3082  | 3389  | 3400  | 4122  | 4011  | 3865  | Mpdu1     |
| Mpdz      | 12702 | 11577 | 9009  | 9052  | 8818  | 10556 | 10676 | 11358 | 11742 | 9924  | 11031 | 14066 | 13267 | 14119 | 12221 | 12444 | 9523  | 9333  | 9171  | 11193 | 10299 | 9105  | 10965 | 10598 | 10793 | 10113 | 14878 | 13324 | Mpdz      |
| Mpeg1     | 617   | 546   | 447   | 520   | 624   | 552   | 476   | 834   | 830   | 660   | 6123  | 709   | 582   | 577   | 684   | 484   | 499   | 614   | 511   | 551   | 575   | 939   | 1153  | 730   | 697   | 732   | 597   | 610   | Mpeg1     |
| Mpg       | 1720  | 1792  | 1780  | 1605  | 1780  | 1688  | 1638  | 1332  | 1591  | 1591  | 1655  | 1607  | 1733  | 1479  | 1701  | 1597  | 1924  | 1679  | 1880  | 1760  | 1608  | 1609  | 1564  | 1637  | 1578  | 1720  | 1646  | 1610  | Mpg       |
| Mphosph10 | 4104  | 3714  | 4080  | 3511  | 2890  | 3036  | 3412  | 3527  | 3062  | 2786  | 2884  | 3631  | 3353  | 3863  | 4304  | 3773  | 3650  | 3179  | 3068  | 4089  | 3032  | 2607  | 3329  | 3028  | 4259  | 3794  | 3938  |       | Mphosph10 |
| Mphosph6  | 1566  | 1379  | 1829  | 1479  | 1492  | 1500  | 1600  | 1537  | 1366  | 1687  | 1557  | 1742  | 1577  | 1966  | 1716  | 1336  | 1647  | 1533  | 1502  | 1668  | 1564  | 1485  | 1544  | 1749  | 1478  | 2043  | 1708  | 1976  | Mphosph6  |

|          |       |       |       |       |       |       |       |       |       |       |       |       |       |       |       |       |       |       |       |       |       |       |       |       |       |       |       |       |          |       |
|----------|-------|-------|-------|-------|-------|-------|-------|-------|-------|-------|-------|-------|-------|-------|-------|-------|-------|-------|-------|-------|-------|-------|-------|-------|-------|-------|-------|-------|----------|-------|
| Mrc2     | 3665  | 4418  | 5515  | 3541  | 2855  | 3943  | 2196  | 4195  | 6387  | 5991  | 7588  | 6358  | 7386  | 5437  | 3330  | 4718  | 4118  | 4265  | 2904  | 2354  | 2221  | 5310  | 7022  | 6615  | 5038  | 7041  | 6465  | 5814  | Mrc2     |       |
| Mrc11a   | 3720  | 3586  | 2931  | 2894  | 2522  | 3133  | 3149  | 3323  | 3221  | 2950  | 3150  | 3839  | 3540  | 4133  | 3580  | 3262  | 2647  | 2542  | 2623  | 3463  | 3296  | 2540  | 3014  | 3185  | 2938  | 3825  | 3936  | 4078  | Mrc11a   |       |
| Mreg     | 670   | 670   | 540   | 585   | 641   | 376   | 445   | 371   | 269   | 258   | 293   | 126   | 494   | 125   | 874   | 945   | 782   | 589   | 404   | 374   | 396   | 297   | 195   | 200   | 221   | 242   | 131   | 155   | Mreg     |       |
| Mrfap1   | 18481 | 14785 | 19728 | 14954 | 13853 | 14400 | 14191 | 20262 | 18208 | 17786 | 20980 | 21411 | 21673 | 19674 | 17033 | 15798 | 16606 | 14801 | 14869 | 15825 | 12296 | 17645 | 18528 | 21194 | 18887 | 26704 | 22724 | 21748 | Mrfap1   |       |
| Mrgbp    | 2384  | 2598  | 2668  | 2745  | 2609  | 2564  | 2769  | 2870  | 2661  | 2793  | 2627  | 3023  | 2768  | 3126  | 2469  | 2201  | 2840  | 2509  | 2740  | 2821  | 2738  | 2630  | 2564  | 3164  | 3132  | 3464  | 2915  | 3043  | Mrgbp    |       |
| Mrgpra2a | 0     | 0     | 0     | 0     | 0     | 0     | 0     | 0     | 0     | 0     | 0     | 0     | 0     | 0     | 0     | 0     | 0     | 0     | 0     | 0     | 0     | 0     | 0     | 0     | 0     | 0     | 0     | 0     | Mrgpra2a |       |
| Mrgpra2b | 0     | 0     | 0     | 0     | 0     | 0     | 0     | 0     | 0     | 0     | 1     | 0     | 1     | 0     | 0     | 0     | 0     | 0     | 0     | 0     | 0     | 0     | 0     | 0     | 0     | 0     | 0     | 0     | Mrgpra2b |       |
| Mrgprd   | 0     | 0     | 0     | 0     | 0     | 0     | 0     | 2     | 0     | 0     | 0     | 0     | 0     | 0     | 0     | 0     | 0     | 0     | 0     | 0     | 0     | 0     | 0     | 0     | 0     | 0     | 0     | 0     | Mrgprd   |       |
| Mrgpre   | 255   | 297   | 291   | 305   | 479   | 386   | 335   | 452   | 474   | 554   | 484   | 493   | 573   | 504   | 344   | 282   | 379   | 280   | 394   | 322   | 349   | 702   | 497   | 498   | 536   | 443   | 470   | 510   | Mrgpre   |       |
| Mrgprf   | 12    | 13    | 7     | 25    | 48    | 37    | 35    | 81    | 91    | 86    | 99    | 96    | 61    | 38    | 12    | 4     | 19    | 40    | 31    | 31    | 28    | 102   | 205   | 101   | 76    | 63    | 45    | 52    | Mrgprf   |       |
| Mrgprh   | 10    | 1     | 5     | 2     | 1     | 7     | 2     | 2     | 7     | 0     | 8     | 1     | 8     | 2     | 5     | 16    | 0     | 2     | 0     | 0     | 2     | 12    | 5     | 2     | 5     | 0     | 1     | 1     | Mrgprh   |       |
| Mrgprx1  | 0     | 0     | 0     | 0     | 0     | 0     | 0     | 0     | 1     | 0     | 0     | 0     | 0     | 0     | 0     | 0     | 0     | 0     | 0     | 0     | 0     | 0     | 1     | 0     | 0     | 0     | 0     | 0     | Mrgprx1  |       |
| Mri1     | 1384  | 1470  | 1431  | 1505  | 1422  | 1423  | 1445  | 1327  | 1346  | 1401  | 1388  | 1565  | 1470  | 1594  | 1226  | 1260  | 1628  | 1459  | 1645  | 1365  | 1410  | 1477  | 1232  | 1470  | 1667  | 1586  | 1599  | 1603  | Mri1     |       |
| Mrln     | 30    | 16    | 25    | 38    | 62    | 35    | 66    | 24    | 37    | 34    | 136   | 34    | 37    | 29    | 34    | 40    | 28    | 66    | 42    | 20    | 57    | 79    | 114   | 22    | 16    | 30    | 19    | 26    | Mrln     |       |
| Mrm1     | 964   | 1278  | 1254  | 1205  | 1019  | 1039  | 953   | 539   | 593   | 583   | 595   | 665   | 552   | 583   | 1051  | 1017  | 1320  | 1165  | 1179  | 1124  | 1034  | 473   | 579   | 530   | 500   | 721   | 657   | 686   | Mrm1     |       |
| Mrm2     | 601   | 783   | 677   | 710   | 641   | 657   | 583   | 568   | 612   | 575   | 507   | 529   | 532   | 511   | 637   | 725   | 692   | 664   | 668   | 654   | 632   | 583   | 612   | 594   | 637   | 632   | 604   | 587   | Mrm2     |       |
| Mrm3     | 386   | 502   | 416   | 477   | 395   | 433   | 373   | 503   | 602   | 522   | 458   | 512   | 493   | 495   | 433   | 412   | 442   | 344   | 355   | 448   | 347   | 535   | 561   | 493   | 518   | 623   | 539   | 476   | Mrm3     |       |
| Mrnip    | 874   | 935   | 901   | 973   | 843   | 868   | 926   | 772   | 885   | 803   | 793   | 1013  | 770   | 912   | 916   | 819   | 972   | 801   | 934   | 1025  | 953   | 812   | 869   | 925   | 877   | 909   | 906   | 845   | Mrnip    |       |
| Mro      | 332   | 372   | 366   | 488   | 500   | 443   | 558   | 217   | 280   | 304   | 290   | 300   | 271   | 261   | 316   | 308   | 445   | 429   | 533   | 416   | 488   | 256   | 245   | 284   | 279   | 258   | 275   | 260   | Mro      |       |
| Mroh1    | 5266  | 7082  | 6482  | 7924  | 7251  | 6969  | 6090  | 2992  | 3353  | 3951  | 3562  | 3463  | 3317  | 2864  | 5413  | 6883  | 7579  | 7746  | 7412  | 5709  | 6290  | 4132  | 3295  | 3507  | 3717  | 2604  | 3194  | 2928  | Mroh1    |       |
| Mroh2a   | 1     | 5     | 7     | 7     | 5     | 7     | 9     | 6     | 6     | 10    | 6     | 7     | 6     | 6     | 1     | 2     | 5     | 10    | 2     | 15    | 3     | 3     | 8     | 12    | 6     | 3     | 7     | 2     | Mroh2a   |       |
| Mroh2b   | 0     | 0     | 0     | 0     | 0     | 0     | 0     | 0     | 0     | 0     | 3     | 0     | 0     | 0     | 0     | 0     | 0     | 0     | 0     | 0     | 0     | 0     | 0     | 0     | 0     | 0     | 0     | 0     | Mroh2b   |       |
| Mroh3    | 141   | 130   | 86    | 124   | 116   | 102   | 158   | 61    | 43    | 34    | 41    | 68    | 71    | 48    | 94    | 132   | 85    | 86    | 139   | 133   | 126   | 38    | 55    | 49    | 75    | 76    | 69    | 69    | Mroh3    |       |
| Mroh4    | 0     | 0     | 0     | 2     | 0     | 0     | 0     | 0     | 0     | 0     | 0     | 0     | 0     | 0     | 0     | 0     | 0     | 0     | 0     | 0     | 1     | 0     | 1     | 0     | 0     | 0     | 0     | 0     | Mroh4    |       |
| Mroh5    | 1     | 2     | 0     | 0     | 0     | 7     | 2     | 4     | 3     | 1     | 0     | 3     | 2     | 0     | 4     | 0     | 0     | 1     | 3     | 1     | 2     | 2     | 3     | 1     | 1     | 1     | 0     | 4     | Mroh5    |       |
| Mroh6    | 48    | 82    | 62    | 103   | 61    | 57    | 83    | 9     | 11    | 10    | 9     | 10    | 6     | 7     | 59    | 101   | 73    | 142   | 69    | 31    | 70    | 8     | 12    | 19    | 14    | 8     | 16    | 19    | Mroh6    |       |
| Mroh7    | 38    | 67    | 24    | 72    | 77    | 88    | 53    | 56    | 74    | 85    | 99    | 52    | 57    | 36    | 45    | 65    | 44    | 85    | 65    | 74    | 46    | 84    | 89    | 64    | 81    | 59    | 37    | 31    | Mroh7    |       |
| Mroh8    | 43    | 60    | 37    | 39    | 56    | 33    | 67    | 28    | 31    | 30    | 52    | 28    | 32    | 40    | 24    | 28    | 42    | 61    | 48    | 39    | 49    | 32    | 27    | 36    | 15    | 37    | 34    | 39    | Mroh8    |       |
| Mroh9    | 2     | 6     | 0     | 0     | 0     | 2     | 2     | 2     | 0     | 1     | 0     | 1     | 3     | 3     | 9     | 0     | 2     | 0     | 0     | 0     | 1     | 0     | 0     | 2     | 0     | 0     | 0     | 1     | Mroh9    |       |
| Mrp1     | 1651  | 1410  | 1485  | 1445  | 1346  | 1538  | 1460  | 1833  | 1513  | 1455  | 1475  | 1677  | 1659  | 1789  | 1568  | 1557  | 1488  | 1358  | 1400  | 1512  | 1397  | 1663  | 1581  | 1620  | 1477  | 1833  | 1751  | 1858  | Mrp1     |       |
| Mrp10    | 2534  | 2747  | 2634  | 2305  | 2018  | 2215  | 2026  | 2026  | 2506  | 2516  | 2271  | 2461  | 2545  | 2491  | 2283  | 2523  | 2600  | 2149  | 2122  | 2157  | 2010  | 2141  | 2544  | 2431  | 2155  | 2887  | 2646  | 2549  | Mrp10    |       |
| Mrp11    | 2471  | 2587  | 2679  | 2285  | 2288  | 2352  | 2458  | 3178  | 3073  | 3096  | 3155  | 3413  | 3299  | 3865  | 2502  | 2220  | 2420  | 2127  | 2446  | 2840  | 2458  | 2562  | 2969  | 3389  | 3192  | 3946  | 3703  | 4017  | Mrp11    |       |
| Mrp12    | 3585  | 4380  | 3284  | 3438  | 2869  | 3126  | 3178  | 2928  | 3411  | 2823  | 2864  | 3106  | 3043  | 3185  | 3287  | 3440  | 3218  | 2960  | 3580  | 3436  | 3420  | 2383  | 3350  | 3101  | 2884  | 3796  | 3317  | 3419  | Mrp12    |       |
| Mrp13    | 4706  | 4025  | 3832  | 3743  | 3399  | 3602  | 4282  | 3872  | 3439  | 3227  | 3275  | 3910  | 3621  | 4500  | 4437  | 3797  | 3812  | 3320  | 3633  | 4222  | 3855  | 2943  | 3594  | 3614  | 3360  | 4711  | 4115  | 4374  | Mrp13    |       |
| Mrp14    | 1213  | 1468  | 1262  | 1312  | 1037  | 1122  | 1145  | 862   | 1016  | 980   | 988   | 828   | 971   | 961   | 1113  | 1100  | 1355  | 1292  | 1246  | 1289  | 1138  | 759   | 1086  | 987   | 951   | 1100  | 998   | 1024  | Mrp14    |       |
| Mrp15    | 3321  | 3146  | 2976  | 2792  | 2533  | 2538  | 3285  | 2985  | 2614  | 2721  | 2582  | 2914  | 2801  | 3080  | 3510  | 2788  | 2906  | 2598  | 2825  | 3136  | 3051  | 2675  | 2754  | 2880  | 2722  | 3256  | 2948  | 3432  | Mrp15    |       |
| Mrp16    | 1413  | 1519  | 1623  | 1370  | 1334  | 1370  | 1464  | 1461  | 1491  | 1735  | 1406  | 1517  | 1591  | 1713  | 1424  | 1305  | 1490  | 1387  | 1437  | 1449  | 1407  | 1250  | 1520  | 1499  | 1506  | 1881  | 1678  | 1791  | Mrp16    |       |
| Mrp17    | 2819  | 2819  | 2709  | 3088  | 2691  | 2764  | 3075  | 2165  | 2084  | 1933  | 2241  | 2189  | 2106  | 2471  | 2749  | 2447  | 2783  | 2714  | 2774  | 2687  | 2942  | 1875  | 2316  | 2294  | 1991  | 2475  | 2215  | 2294  | Mrp17    |       |
| Mrp18    | 2607  | 2531  | 2859  | 2501  | 2175  | 2190  | 2623  | 2855  | 2653  | 2888  | 2605  | 3261  | 2993  | 3599  | 2304  | 2308  | 2699  | 2250  | 2497  | 2700  | 2434  | 2182  | 2577  | 3399  | 2984  | 3717  | 3370  | 3769  | Mrp18    |       |
| Mrp19    | 2476  | 2524  | 2430  | 2308  | 2186  | 2424  | 2283  | 2839  | 2525  | 2644  | 2566  | 2721  | 2827  | 2968  | 2472  | 2262  | 2294  | 2112  | 2304  | 2359  | 2382  | 2319  | 2749  | 2586  | 2627  | 2887  | 3216  | 3110  | Mrp19    |       |
| Mrp2     | 1614  | 2151  | 1953  | 1691  | 1312  | 1512  | 1471  | 1348  | 1545  | 1560  | 1514  | 1725  | 1566  | 1851  | 1596  | 1625  | 1738  | 1562  | 1644  | 1505  | 1549  | 1135  | 1459  | 1789  | 1521  | 2180  | 1477  | 1775  | Mrp2     |       |
| Mrp20    | 3886  | 4156  | 3621  | 4045  | 3379  | 3401  | 4136  | 3259  | 3273  | 3055  | 2941  | 3125  | 3156  | 3931  | 4096  | 3581  | 3772  | 3401  | 3540  | 4471  | 4254  | 2627  | 3192  | 3286  | 3216  | 3529  | 3546  | 3982  | Mrp20    |       |
| Mrp21    | 1231  | 1367  | 1643  | 1258  | 1167  | 1172  | 1265  | 1769  | 1691  | 1736  | 1756  | 1831  | 1855  | 2274  | 1300  | 1241  | 1394  | 1045  | 1167  | 1471  | 1136  | 1379  | 1730  | 1961  | 1813  | 2229  | 2028  | 2127  | Mrp21    |       |
| Mrp22    | 1308  | 1447  | 1410  | 1211  | 1111  | 1070  | 1388  | 1114  | 1236  | 1115  | 1082  | 1266  | 1247  | 1450  | 1258  | 1334  | 1341  | 1121  | 1144  | 1295  | 1273  | 932   | 1173  | 1241  | 1137  | 1513  | 1363  | 1591  | Mrp22    |       |
| Mrp23    | 1140  | 1373  | 1398  | 1172  | 1141  | 1396  | 1323  | 1623  | 1886  | 1754  | 1700  | 1861  | 1913  | 2068  | 1031  | 1088  | 1337  | 1216  | 1277  | 1502  | 1252  | 1379  | 1687  | 1869  | 1930  | 2217  | 2060  | 2193  | Mrp23    |       |
| Mrp24    | 6809  | 7551  | 7545  | 7440  | 6166  | 6665  | 7342  | 5488  | 4941  | 5229  | 5239  | 5855  | 5593  | 6051  | 7304  | 6894  | 5719  | 7244  | 6895  | 7559  | 7069  | 5212  | 4963  | 5824  | 6850  | 5504  | 6246  | 6015  | 6163     | Mrp24 |
| Mrp27    | 704   | 774   | 808   | 609   | 663   | 657   | 736   | 1428  | 1487  | 1505  | 1481  | 1672  | 1526  | 1700  | 766   | 675   | 801   | 595   | 655   | 746   | 650   | 1166  | 1494  | 1637  | 1391  | 1832  | 1687  | 1639  | Mrp27    |       |
| Mrp28    | 4092  | 5081  | 3905  | 3895  | 2923  | 3219  | 3461  | 2595  | 2815  | 2531  | 2306  | 2931  | 2749  | 2894  | 3816  | 3692  | 3801  | 3499  | 3808  | 3704  | 3363  | 2283  | 2619  | 2737  | 2784  | 3336  | 3008  | 3357  | Mrp28    |       |
| Mrp3     | 3027  | 2812  | 2858  | 2893  | 3019  | 3264  | 3148  | 4590  | 4348  | 4180  | 4083  | 4642  | 4591  | 4841  | 3045  | 2685  | 2745  | 2719  | 2998  | 3054  | 2990  | 4000  | 4313  | 4256  | 4383  | 5003  | 5017  | 4999  | Mrp3     |       |
| Mrp30    | 3793  | 3999  | 3405  | 3717  | 3245  | 3329  | 3844  | 3270  | 3431  | 2976  | 2911  | 2999  | 3097  | 3510  | 3944  | 3858  | 3686  | 3384  | 3671  | 4297  | 3651  | 2951  | 3270  | 3192  | 3123  | 3522  | 3318  | 3652  | Mrp30    |       |
| Mrp32    | 1987  | 182   |       |       |       |       |       |       |       |       |       |       |       |       |       |       |       |       |       |       |       |       |       |       |       |       |       |       |          |       |

|         |      |      |      |      |      |       |       |      |      |      |      |      |      |      |       |      |      |      |      |      |       |      |      |      |      |      |      |      |         |        |
|---------|------|------|------|------|------|-------|-------|------|------|------|------|------|------|------|-------|------|------|------|------|------|-------|------|------|------|------|------|------|------|---------|--------|
| Mrps14  | 2040 | 1773 | 2052 | 1844 | 1619 | 1541  | 2044  | 2205 | 1952 | 1881 | 1883 | 2353 | 2176 | 2552 | 2144  | 1671 | 2038 | 1699 | 1674 | 2143 | 1902  | 1634 | 1994 | 2344 | 2105 | 2737 | 2692 | 2705 | Mrps14  |        |
| Mrps15  | 1705 | 1756 | 1525 | 1317 | 1441 | 1335  | 1549  | 2397 | 2184 | 2140 | 2081 | 2173 | 2294 | 2421 | 1702  | 1611 | 1581 | 1465 | 1476 | 1594 | 1481  | 2309 | 2139 | 2211 | 2132 | 2440 | 2337 | 2464 | Mrps15  |        |
| Mrps16  | 919  | 1137 | 1118 | 1009 | 993  | 870   | 964   | 1055 | 1392 | 1198 | 1443 | 1227 | 1397 | 1400 | 1005  | 1016 | 1110 | 797  | 984  | 1094 | 953   | 988  | 1478 | 1490 | 1169 | 1442 | 1477 | 1466 | Mrps16  |        |
| Mrps17  | 5852 | 5919 | 5285 | 5573 | 5210 | 5262  | 6327  | 4938 | 4879 | 4746 | 4539 | 4508 | 4578 | 5193 | 5917  | 5478 | 5743 | 5741 | 5534 | 6114 | 6002  | 4535 | 4887 | 4881 | 4813 | 4821 | 4728 | 5064 | Mrps17  |        |
| Mrps18a | 1046 | 1131 | 1245 | 1107 | 1135 | 1116  | 1054  | 1491 | 1788 | 1718 | 1731 | 1682 | 1738 | 1855 | 1005  | 1076 | 1205 | 1052 | 1199 | 1103 | 1092  | 1516 | 1720 | 1830 | 1670 | 1907 | 1804 | 1902 | Mrps18a |        |
| Mrps18b | 961  | 1128 | 945  | 875  | 867  | 826   | 811   | 863  | 1128 | 938  | 973  | 1111 | 1097 | 978  | 959   | 956  | 1045 | 856  | 1004 | 988  | 785   | 809  | 1137 | 990  | 1061 | 1288 | 1303 | 1044 | Mrps18b |        |
| Mrps18c | 588  | 438  | 393  | 422  | 352  | 265   | 574   | 536  | 369  | 458  | 461  | 444  | 424  | 738  | 494   | 282  | 435  | 333  | 309  | 404  | 639   | 500  | 347  | 560  | 461  | 463  | 447  | 762  | Mrps18c |        |
| Mrps2   | 2951 | 2886 | 2887 | 2560 | 2535 | 2648  | 2830  | 2787 | 2824 | 2880 | 2623 | 3133 | 2852 | 3242 | 2867  | 2761 | 2958 | 2714 | 2846 | 2701 | 2737  | 2653 | 2713 | 3103 | 2676 | 3673 | 2933 | 3217 | Mrps2   |        |
| Mrps21  | 1556 | 1831 | 2189 | 1963 | 1760 | 1562  | 2202  | 1835 | 1859 | 2276 | 2238 | 2411 | 2224 | 2831 | 1560  | 1401 | 2145 | 1811 | 2000 | 2001 | 2078  | 1419 | 1925 | 2675 | 2452 | 2752 | 2458 | 3014 | Mrps21  |        |
| Mrps22  | 2886 | 2663 | 2562 | 2498 | 2167 | 2316  | 2570  | 2235 | 1939 | 1725 | 1671 | 2155 | 2059 | 2205 | 3096  | 2670 | 2553 | 2261 | 2359 | 2954 | 2398  | 1744 | 1950 | 1960 | 1847 | 2320 | 2080 | 2124 | Mrps22  |        |
| Mrps23  | 145  | 71   | 83   | 216  | 77   | 77    | 77    | 110  | 48   | 248  | 59   | 80   | 268  | 54   | 132   | 178  | 227  | 136  | 83   | 101  | 87    | 122  | 60   | 168  | 75   | 66   | 91   | 74   | Mrps23  |        |
| Mrps24  | 1183 | 1286 | 1052 | 1233 | 1068 | 988   | 1268  | 1242 | 1242 | 1189 | 1218 | 1315 | 1173 | 1323 | 1091  | 1017 | 1258 | 1082 | 1206 | 1411 | 1253  | 1016 | 1276 | 1441 | 1393 | 1419 | 1352 | 1426 | Mrps24  |        |
| Mrps25  | 2835 | 2769 | 2813 | 2506 | 2060 | 2311  | 2542  | 2678 | 2464 | 2460 | 2341 | 2438 | 2660 | 2726 | 2694  | 2671 | 2760 | 2249 | 2412 | 2556 | 2481  | 2059 | 2481 | 2647 | 2574 | 2820 | 2767 | 3007 | Mrps25  |        |
| Mrps26  | 2074 | 2256 | 2211 | 2322 | 2120 | 2032  | 2134  | 1579 | 1543 | 1806 | 1767 | 1782 | 1610 | 1802 | 1805  | 1962 | 2257 | 2222 | 2238 | 1771 | 2117  | 1791 | 1557 | 1775 | 1733 | 1961 | 1809 | 1718 | Mrps26  |        |
| Mrps27  | 2130 | 2371 | 2119 | 1876 | 1552 | 1680  | 1783  | 2104 | 2202 | 1848 | 1908 | 2364 | 2357 | 2218 | 2024  | 2122 | 1827 | 1601 | 1792 | 1734 | 1736  | 1718 | 2198 | 2118 | 2159 | 2698 | 2248 | 2612 | Mrps27  |        |
| Mrps28  | 325  | 413  | 404  | 337  | 299  | 326   | 345   | 457  | 515  | 554  | 504  | 641  | 578  | 641  | 326   | 303  | 415  | 284  | 402  | 432  | 319   | 299  | 505  | 618  | 529  | 693  | 652  | 675  | Mrps28  |        |
| Mrps30  | 2008 | 1751 | 1569 | 1644 | 1553 | 1437  | 1771  | 2395 | 2233 | 1977 | 2082 | 2194 | 2265 | 2374 | 1924  | 1659 | 1677 | 1443 | 1741 | 1558 | 1800  | 2202 | 2308 | 2223 | 2031 | 2668 | 2184 | 2572 | Mrps30  |        |
| Mrps31  | 1737 | 1721 | 1708 | 1554 | 1489 | 1516  | 1735  | 1658 | 1695 | 1505 | 1563 | 1642 | 1569 | 1840 | 1957  | 1635 | 1773 | 1498 | 1544 | 1908 | 1615  | 1424 | 1636 | 1597 | 1504 | 1784 | 1671 | 1860 | Mrps31  |        |
| Mrps33  | 2315 | 2298 | 2358 | 2258 | 1843 | 1674  | 2615  | 2677 | 2174 | 2266 | 2017 | 2194 | 1923 | 2946 | 2583  | 1884 | 2250 | 1881 | 2050 | 2278 | 2611  | 2002 | 2158 | 2240 | 2257 | 2549 | 2363 | 3021 | Mrps33  |        |
| Mrps34  | 1353 | 1469 | 1741 | 1622 | 1458 | 1383  | 1351  | 1213 | 1278 | 1547 | 1475 | 1651 | 1504 | 1535 | 1280  | 1270 | 1763 | 1465 | 1577 | 1330 | 1331  | 1285 | 1363 | 1687 | 1551 | 1932 | 1553 | 1476 | Mrps34  |        |
| Mrps35  | 1081 | 952  | 1035 | 1041 | 1069 | 1012  | 1154  | 1745 | 1809 | 1701 | 1792 | 1935 | 1776 | 1980 | 984   | 884  | 999  | 861  | 1181 | 1010 | 1048  | 1586 | 1692 | 1934 | 1884 | 2221 | 1898 | 2034 | Mrps35  |        |
| Mrps36  | 681  | 745  | 916  | 828  | 821  | 792   | 898   | 807  | 856  | 884  | 1001 | 876  | 1108 | 1165 | 686   | 663  | 867  | 734  | 906  | 979  | 931   | 708  | 856  | 1018 | 955  | 1015 | 1063 | 1174 | Mrps36  |        |
| Mrps5   | 3749 | 4150 | 3916 | 3903 | 4081 | 4099  | 4157  | 5620 | 5370 | 4895 | 4978 | 5272 | 5006 | 5753 | 3831  | 3593 | 3919 | 3735 | 4198 | 4631 | 4088  | 4881 | 5133 | 5329 | 5689 | 5389 | 5698 | 5603 | Mrps5   |        |
| Mrps6   | 1753 | 1675 | 1571 | 1848 | 1462 | 1301  | 2080  | 1147 | 921  | 1140 | 1062 | 1017 | 1012 | 1232 | 1780  | 1151 | 1633 | 1613 | 1556 | 1568 | 2003  | 1208 | 1009 | 1213 | 1078 | 1048 | 815  | 1276 | Mrps6   |        |
| Mrps7   | 2135 | 2562 | 2307 | 2037 | 1905 | 1873  | 1922  | 2130 | 2240 | 2336 | 2386 | 2610 | 2498 | 2527 | 1993  | 2157 | 2213 | 2012 | 2079 | 2245 | 2037  | 1820 | 2368 | 2378 | 2166 | 2933 | 2619 | 2735 | Mrps7   |        |
| Mrps9   | 3841 | 3842 | 3924 | 3536 | 3224 | 3559  | 3589  | 2999 | 2981 | 2528 | 2673 | 3372 | 3275 | 3432 | 3927  | 3716 | 3473 | 3230 | 3527 | 4072 | 3475  | 2351 | 3104 | 2979 | 2823 | 3446 | 3565 | 3612 | Mrps9   |        |
| Mrrf    | 1039 | 1073 | 1013 | 1132 | 1118 | 1071  | 1188  | 1986 | 1963 | 1745 | 1695 | 1727 | 1717 | 1121 | 1121  | 1024 | 1077 | 1001 | 1206 | 1180 | 1125  | 1895 | 1961 | 1876 | 1875 | 1712 | 1804 | 1786 | Mrrf    |        |
| Mrs2    | 9720 | 9653 | 7514 | 9670 | 9709 | 10472 | 10594 | 7720 | 7297 | 7877 | 7041 | 8326 | 8031 | 8357 | 10213 | 9332 | 8905 | 9206 | 9056 | 9677 | 10389 | 7352 | 6750 | 6716 | 8158 | 5649 | 8280 | 7834 | Mrs2    |        |
| Mrtfa   | 2971 | 3841 | 3934 | 4454 | 4300 | 3695  | 3247  | 2212 | 2653 | 2895 | 3101 | 3169 | 2465 | 2707 | 2807  | 3666 | 4195 | 4478 | 4157 | 2769 | 3598  | 3349 | 2658 | 3099 | 3126 | 3249 | 4618 | 2759 | Mrtfa   |        |
| Mrtfb   | 2982 | 2711 | 2189 | 2482 | 2671 | 2727  | 2448  | 3309 | 4005 | 3668 | 3895 | 3755 | 4140 | 3663 | 2676  | 3125 | 2283 | 2442 | 2311 | 2194 | 2279  | 3370 | 3848 | 3276 | 3696 | 2804 | 3710 | 3401 | Mrtfb   |        |
| Mrt04   | 1897 | 2020 | 2001 | 1883 | 1664 | 1828  | 1914  | 2081 | 2132 | 2193 | 2147 | 2578 | 2490 | 2498 | 1833  | 1783 | 1984 | 1719 | 1838 | 1779 | 1896  | 1923 | 1953 | 2376 | 2400 | 3185 | 2662 | 2820 | Mrt04   |        |
| Ms4a1   | 0    | 1    | 0    | 0    | 0    | 0     | 0     | 0    | 0    | 0    | 0    | 0    | 0    | 0    | 0     | 0    | 1    | 0    | 0    | 0    | 0     | 0    | 0    | 0    | 0    | 0    | 4    | 0    | 0       | Ms4a1  |
| Ms4a10  | 0    | 0    | 0    | 0    | 0    | 0     | 0     | 2    | 0    | 0    | 3    | 0    | 0    | 3    | 1     | 1    | 0    | 0    | 0    | 0    | 0     | 0    | 0    | 0    | 0    | 0    | 0    | 4    | 0       | Ms4a10 |
| Ms4a13  | 0    | 0    | 0    | 0    | 0    | 0     | 0     | 0    | 0    | 0    | 0    | 0    | 0    | 0    | 0     | 2    | 0    | 0    | 0    | 0    | 0     | 0    | 0    | 0    | 0    | 0    | 0    | 0    | 0       | Ms4a13 |
| Ms4a14  | 17   | 13   | 15   | 22   | 31   | 18    | 11    | 10   | 21   | 24   | 38   | 23   | 18   | 26   | 20    | 23   | 6    | 24   | 16   | 8    | 15    | 32   | 52   | 28   | 8    | 10   | 24   | 17   | Ms4a14  |        |
| Ms4a15  | 0    | 0    | 0    | 0    | 0    | 0     | 0     | 1    | 0    | 0    | 0    | 0    | 0    | 0    | 0     | 0    | 0    | 0    | 0    | 0    | 0     | 0    | 0    | 0    | 0    | 0    | 0    | 0    | 0       | Ms4a15 |
| Ms4a2   | 2    | 0    | 10   | 2    | 3    | 10    | 0     | 12   | 8    | 10   | 27   | 4    | 3    | 0    | 9     | 2    | 5    | 0    | 4    | 4    | 1     | 13   | 9    | 0    | 4    | 1    | 3    | 2    | Ms4a2   |        |
| Ms4a20  | 0    | 0    | 0    | 0    | 0    | 2     | 0     | 0    | 0    | 0    | 0    | 0    | 0    | 0    | 0     | 0    | 0    | 0    | 0    | 0    | 0     | 0    | 0    | 0    | 0    | 0    | 0    | 0    | 0       | Ms4a20 |
| Ms4a3   | 1    | 1    | 0    | 1    | 0    | 0     | 0     | 0    | 0    | 0    | 6    | 1    | 0    | 0    | 0     | 2    | 0    | 0    | 0    | 0    | 4     | 0    | 2    | 3    | 0    | 0    | 0    | 0    | 0       | Ms4a3  |
| Ms4a4a  | 32   | 29   | 52   | 26   | 38   | 56    | 27    | 60   | 69   | 59   | 126  | 61   | 70   | 65   | 49    | 61   | 35   | 25   | 26   | 35   | 28    | 77   | 112  | 83   | 70   | 93   | 67   | 74   | Ms4a4a  |        |
| Ms4a4b  | 0    | 0    | 0    | 1    | 0    | 0     | 0     | 0    | 0    | 1    | 0    | 2    | 1    | 0    | 0     | 0    | 0    | 0    | 0    | 0    | 2     | 1    | 0    | 0    | 0    | 2    | 5    | 5    | Ms4a4b  |        |
| Ms4a4c  | 3    | 2    | 0    | 5    | 2    | 2     | 9     | 2    | 5    | 11   | 6    | 3    | 5    | 6    | 3     | 10   | 0    | 1    | 0    | 0    | 2     | 5    | 3    | 5    | 2    | 4    | 0    | 0    | 1       | Ms4a4c |
| Ms4a4d  | 3    | 8    | 4    | 0    | 0    | 0     | 0     | 4    | 7    | 3    | 10   | 10   | 2    | 1    | 3     | 4    | 6    | 0    | 0    | 1    | 0     | 3    | 6    | 1    | 9    | 4    | 6    | 7    | Ms4a4d  |        |
| Ms4a5   | 0    | 0    | 0    | 0    | 0    | 0     | 0     | 0    | 0    | 0    | 0    | 0    | 0    | 0    | 0     | 0    | 0    | 0    | 0    | 1    | 0     | 0    | 0    | 0    | 0    | 0    | 0    | 0    | 0       | Ms4a5  |
| Ms4a6b  | 122  | 86   | 146  | 65   | 125  | 122   | 85    | 186  | 250  | 181  | 238  | 242  | 226  | 176  | 144   | 137  | 92   | 68   | 73   | 133  | 79    | 221  | 381  | 167  | 202  | 214  | 216  | 198  | Ms4a6b  |        |
| Ms4a6c  | 144  | 113  | 150  | 99   | 121  | 102   | 68    | 186  | 222  | 221  | 304  | 240  | 257  | 218  | 149   | 165  | 116  | 123  | 74   | 120  | 103   | 249  | 423  | 197  | 206  | 253  | 221  | 237  | Ms4a6c  |        |
| Ms4a6d  | 96   | 105  | 97   | 78   | 70   | 72    | 74    | 121  | 140  | 89   | 154  | 75   | 100  | 77   | 121   | 162  | 95   | 77   | 55   | 116  | 69    | 110  | 181  | 103  | 73   | 126  | 115  | 116  | Ms4a6d  |        |
| Ms4a7   | 63   | 53   | 44   | 58   | 59   | 65    | 49    | 81   | 103  | 60   | 142  | 59   | 75   | 63   | 47    | 63   | 28   | 78   | 50   | 59   | 36    | 97   | 188  | 99   | 100  | 53   | 89   | 93   | Ms4a7   |        |
| Ms4a8a  | 0    | 0    | 0    | 1    | 0    | 3     | 0     | 0    | 0    | 0    | 0    | 0    | 0    | 0    | 0     | 0    | 0    | 0    | 0    | 0    | 0     | 0    | 0    | 0    | 0    | 0    | 0    | 4    | Ms4a8a  |        |
| Msantd1 | 202  | 337  | 249  | 329  | 277  | 305   | 294   | 201  | 160  | 188  | 217  | 203  | 187  | 198  | 202   | 290  | 279  | 347  | 278  | 278  | 268   | 231  | 157  | 210  | 215  | 208  | 180  | 147  | Msantd  |        |

|         |        |        |        |        |        |        |        |        |        |        |        |        |        |        |        |        |        |        |        |        |        |        |        |        |        |        |        |         |         |
|---------|--------|--------|--------|--------|--------|--------|--------|--------|--------|--------|--------|--------|--------|--------|--------|--------|--------|--------|--------|--------|--------|--------|--------|--------|--------|--------|--------|---------|---------|
| Mst1r   | 407    | 441    | 508    | 413    | 416    | 394    | 220    | 238    | 308    | 347    | 453    | 264    | 347    | 231    | 415    | 549    | 428    | 450    | 379    | 300    | 281    | 329    | 383    | 303    | 272    | 206    | 278    | 266     | Mst1r   |
| Mstn    | 134    | 92     | 43     | 80     | 80     | 76     | 64     | 42     | 119    | 49     | 470    | 11     | 64     | 17     | 123    | 202    | 59     | 77     | 45     | 59     | 57     | 104    | 340    | 25     | 27     | 14     | 7      | 13      | Mstn    |
| Msto1   | 1499   | 1809   | 1667   | 1602   | 1537   | 1639   | 1462   | 1461   | 1668   | 1661   | 1675   | 2086   | 1754   | 1940   | 1487   | 1730   | 1550   | 1472   | 1713   | 1404   | 1550   | 1491   | 1748   | 1701   | 1684   | 2180   | 1933   | 1971    | Msto1   |
| Msk1    | 3725   | 2884   | 3298   | 1282   | 920    | 1284   | 687    | 2727   | 1926   | 1838   | 982    | 1614   | 2273   | 1506   | 2271   | 3549   | 1683   | 1188   | 716    | 1034   | 671    | 1046   | 2265   | 1717   | 934    | 2244   | 1888   | 2051    | Msk1    |
| Msk2    | 1399   | 1557   | 1722   | 717    | 246    | 897    | 104    | 793    | 962    | 886    | 706    | 1158   | 2028   | 1072   | 1568   | 2079   | 948    | 810    | 249    | 213    | 113    | 1161   | 1069   | 720    | 751    | 955    | 1383   | 1488    | Msk2    |
| Msk3    | 281    | 793    | 279    | 578    | 716    | 610    | 352    | 308    | 346    | 403    | 339    | 159    | 955    | 93     | 774    | 1069   | 769    | 436    | 410    | 686    | 288    | 368    | 495    | 70     | 255    | 105    | 83     | 87      | Msk3    |
| Mt1     | 714    | 853    | 782    | 734    | 606    | 736    | 799    | 315    | 481    | 385    | 497    | 447    | 494    | 583    | 705    | 661    | 721    | 705    | 863    | 917    | 749    | 207    | 526    | 503    | 462    | 474    | 415    | 705     | Mt1     |
| Mt2     | 497    | 599    | 648    | 441    | 456    | 527    | 725    | 355    | 547    | 442    | 547    | 541    | 574    | 758    | 600    | 472    | 495    | 507    | 499    | 617    | 550    | 122    | 463    | 657    | 522    | 542    | 411    | 921     | Mt2     |
| Mt3     | 460    | 758    | 415    | 1232   | 1298   | 862    | 1766   | 954    | 817    | 1179   | 824    | 799    | 386    | 1448   | 571    | 239    | 954    | 1119   | 1184   | 1021   | 1803   | 779    | 709    | 1533   | 1345   | 932    | 501    | 813     | Mt3     |
| Mt4     | 0      | 0      | 4      | 0      | 0      | 0      | 0      | 0      | 0      | 0      | 0      | 0      | 1      | 1      | 0      | 0      | 0      | 0      | 0      | 0      | 0      | 0      | 0      | 0      | 0      | 0      | 0      | 0       | Mt4     |
| Mta1    | 5287   | 6173   | 8451   | 7516   | 6667   | 6037   | 5541   | 6006   | 6906   | 8782   | 7904   | 10153  | 7562   | 9326   | 4787   | 5597   | 8069   | 6769   | 7634   | 4924   | 6543   | 7971   | 6694   | 10055  | 8725   | 11687  | 8105   | 8981    | Mta1    |
| Mta2    | 13867  | 14076  | 15254  | 15479  | 14117  | 14527  | 14328  | 13122  | 13631  | 13975  | 13803  | 16376  | 14983  | 16429  | 13152  | 12690  | 15383  | 13980  | 16295  | 13460  | 6540   | 13100  | 12852  | 15886  | 15194  | 18617  | 15903  | 16773   | Mta2    |
| Mta3    | 1027   | 1088   | 1160   | 1053   | 1532   | 1430   | 1272   | 1776   | 2037   | 2137   | 2166   | 1972   | 2131   | 1906   | 1114   | 1105   | 1043   | 1104   | 1366   | 1157   | 1281   | 1953   | 2028   | 2027   | 2026   | 1988   | 1954   | 1943    | Mta3    |
| Mtap    | 8412   | 6825   | 7529   | 5559   | 4525   | 5054   | 5674   | 3821   | 3756   | 3487   | 3535   | 4237   | 4196   | 4499   | 7283   | 7009   | 6304   | 5362   | 5142   | 5343   | 4994   | 2989   | 3746   | 3840   | 3197   | 5845   | 4369   | 4965    | Mtap    |
| Mtarc1  | 23     | 29     | 29     | 32     | 45     | 29     | 27     | 7      | 11     | 9      | 11     | 8      | 5      | 6      | 29     | 30     | 17     | 47     | 31     | 24     | 17     | 17     | 5      | 4      | 4      | 4      | 8      | 6       | Mtarc1  |
| Mtarc2  | 3609   | 3507   | 2898   | 2933   | 2876   | 2800   | 2542   | 2164   | 2330   | 2065   | 2192   | 1919   | 2291   | 1755   | 3538   | 3571   | 2950   | 2972   | 2849   | 3058   | 2632   | 1868   | 2452   | 2014   | 1872   | 2090   | 1948   | 1958    | Mtarc2  |
| mt-Atp6 | 3358   | 693    | 928    | 1017   | 957    | 1196   | 901    | 3309   | 919    | 921    | 943    | 854    | 1035   | 1003   | 3939   | 1058   | 816    | 6116   | 1509   | 1379   | 1217   | 3716   | 1058   | 961    | 1131   | 1047   | 1233   | 900     | mt-Atp6 |
| mt-Atp8 | 5      | 5      | 4      | 7      | 7      | 6      | 6      | 12     | 10     | 5      | 5      | 4      | 5      | 7      | 3      | 5      | 6      | 2      | 5      | 7      | 3      | 4      | 5      | 2      | 8      | 3      | 8      | 8       | mt-Atp8 |
| Mtbp    | 2342   | 1887   | 1945   | 1597   | 1416   | 1556   | 1666   | 2143   | 2076   | 1793   | 2012   | 2465   | 2218   | 2458   | 1924   | 2028   | 1690   | 1563   | 1543   | 1846   | 1509   | 1494   | 1881   | 1924   | 1827   | 2436   | 2560   | 2430    | Mtbp    |
| Mtch1   | 20965  | 27227  | 22638  | 24899  | 22477  | 22340  | 20966  | 18315  | 20795  | 19568  | 18769  | 19987  | 19002  | 18632  | 21001  | 22286  | 24270  | 23776  | 24622  | 22040  | 22673  | 19859  | 20650  | 20447  | 20997  | 21382  | 19601  | 19378   | Mtch1   |
| Mtch2   | 4571   | 4563   | 4103   | 4094   | 4256   | 4271   | 4666   | 3854   | 3527   | 2842   | 3162   | 3492   | 3405   | 3363   | 4737   | 4597   | 4247   | 4215   | 4324   | 5099   | 4239   | 3400   | 3562   | 2993   | 3348   | 3503   | 4007   | 3579    | Mtch2   |
| Mtcl1   | 5259   | 7724   | 8851   | 9430   | 9543   | 8117   | 7373   | 4664   | 4476   | 5812   | 5429   | 7417   | 7392   | 7275   | 6173   | 6669   | 10032  | 8911   | 9075   | 6642   | 8191   | 6492   | 4598   | 6219   | 6580   | 4697   | 7749   | 7882    | Mtcl1   |
| mt-Co1  | 612083 | 482357 | 491775 | 474052 | 510775 | 542890 | 555449 | 646653 | 570404 | 481101 | 473496 | 494983 | 501397 | 505962 | 684471 | 563998 | 479373 | 524917 | 520070 | 642841 | 577214 | 611214 | 576603 | 483962 | 500296 | 552322 | 514897 | 543478  | mt-Co1  |
| mt-Co2  | 4485   | 1975   | 2296   | 2602   | 2317   | 2824   | 2451   | 4135   | 2401   | 1949   | 2280   | 2115   | 2854   | 2567   | 4623   | 2534   | 2020   | 2456   | 2686   | 2934   | 2311   | 4712   | 2542   | 2414   | 2304   | 2557   | 2517   | 2591    | mt-Co2  |
| mt-Co3  | 4209   | 1437   | 1398   | 1835   | 1787   | 2251   | 1923   | 4881   | 1962   | 1514   | 1628   | 1669   | 1932   | 1738   | 4825   | 2064   | 1482   | 1847   | 1905   | 2660   | 2019   | 4463   | 2232   | 1753   | 1731   | 1872   | 1827   | 1911    | mt-Co3  |
| Mtcp1   | 1362   | 945    | 700    | 972    | 1019   | 1326   | 1209   | 1669   | 1435   | 1121   | 1317   | 1337   | 1374   | 1364   | 1387   | 1143   | 743    | 935    | 895    | 1395   | 1301   | 931    | 1452   | 1044   | 1191   | 724    | 1544   | 1262    | Mtcp1   |
| mt-Cybt | 298285 | 238366 | 255487 | 266796 | 287271 | 287412 | 288098 | 313755 | 276978 | 256119 | 274960 | 258308 | 276587 | 279458 | 325859 | 255688 | 260438 | 280112 | 293635 | 316974 | 308867 | 332210 | 281899 | 285025 | 276917 | 304655 | 275721 | 287895  | mt-Cybt |
| Mtdh    | 13704  | 9784   | 12381  | 12541  | 11999  | 13428  | 13131  | 13455  | 12039  | 12186  | 12679  | 13084  | 12921  | 13381  | 12576  | 11719  | 11281  | 12253  | 12274  | 11801  | 12388  | 12509  | 12200  | 12678  | 12835  | 13825  | 13343  | 13828   | Mtdh    |
| Mterf1a | 505    | 357    | 566    | 476    | 496    | 518    | 501    | 519    | 381    | 410    | 416    | 508    | 408    | 413    | 563    | 448    | 495    | 548    | 483    | 574    | 492    | 446    | 441    | 486    | 432    | 569    | 483    | 544     | Mterf1a |
| Mterf1b | 226    | 191    | 341    | 246    | 265    | 293    | 305    | 231    | 246    | 247    | 259    | 212    | 212    | 278    | 228    | 202    | 261    | 265    | 266    | 214    | 262    | 259    | 219    | 292    | 268    | 296    | 225    | 241     | Mterf1b |
| Mterf2  | 1361   | 1299   | 1329   | 1231   | 1219   | 1245   | 1332   | 1712   | 1393   | 1247   | 1208   | 1489   | 1429   | 1514   | 1627   | 1454   | 1311   | 1082   | 1177   | 1531   | 1289   | 1397   | 1456   | 1324   | 1219   | 1369   | 1464   | 1431    | Mterf2  |
| Mterf3  | 2664   | 2179   | 2023   | 2148   | 2299   | 2598   | 3067   | 4062   | 3381   | 3106   | 3220   | 3292   | 3107   | 3447   | 2666   | 2266   | 2058   | 2319   | 2315   | 2753   | 2806   | 3521   | 3407   | 3244   | 3167   | 2932   | 3359   | 3404    | Mterf3  |
| Mterf4  | 1465   | 1433   | 1515   | 1350   | 1220   | 1226   | 1424   | 1619   | 1430   | 1283   | 1226   | 1402   | 1351   | 1536   | 1446   | 1219   | 1384   | 1281   | 1392   | 1590   | 1364   | 1404   | 1476   | 1393   | 1336   | 1539   | 1536   | 1690    | Mterf4  |
| Mtf1    | 1478   | 1496   | 1775   | 1767   | 1859   | 1645   | 1734   | 1724   | 1678   | 2007   | 1901   | 2191   | 2022   | 2094   | 1333   | 1447   | 1685   | 1771   | 1845   | 1380   | 1706   | 2092   | 1691   | 2017   | 2093   | 1754   | 2105   | 2191    | Mtf1    |
| Mtf2    | 11788  | 8761   | 10305  | 10110  | 10260  | 11127  | 11591  | 15746  | 12131  | 11043  | 11392  | 13667  | 13388  | 14427  | 12217  | 10734  | 10265  | 9652   | 10378  | 12530  | 10739  | 13383  | 11130  | 12428  | 12960  | 13131  | 14423  | 14150   | Mtf2    |
| Mtfmt   | 2209   | 2314   | 2007   | 2274   | 2042   | 2034   | 2215   | 1384   | 1427   | 1422   | 1512   | 1326   | 1433   | 1405   | 2074   | 2139   | 2132   | 2201   | 2018   | 1961   | 2275   | 1519   | 1372   | 1354   | 1428   | 1289   | 1388   | 1352    | Mtfmt   |
| Mtfp1   | 430    | 536    | 551    | 470    | 496    | 448    | 447    | 154    | 219    | 199    | 190    | 270    | 217    | 214    | 411    | 463    | 584    | 434    | 513    | 556    | 509    | 159    | 188    | 250    | 188    | 280    | 212    | 248     | Mtfp1   |
| Mtfr1   | 6406   | 6062   | 5769   | 5704   | 4751   | 5428   | 5582   | 4399   | 3563   | 3602   | 3318   | 4467   | 4016   | 4328   | 6392   | 5649   | 5706   | 5359   | 5216   | 5668   | 5386   | 3307   | 3746   | 3813   | 3759   | 4579   | 4530   | 4686    | Mtfr1   |
| Mtfr11  | 8561   | 9133   | 8076   | 8116   | 7351   | 7065   | 8753   | 5514   | 5257   | 4939   | 4804   | 5139   | 4970   | 5552   | 8614   | 7884   | 8218   | 8098   | 7794   | 7669   | 8457   | 5152   | 5145   | 5132   | 5162   | 4931   | 5402   | Mtfr11  |         |
| Mtfr2   | 1302   | 1195   | 1339   | 1093   | 787    | 911    | 1132   | 628    | 527    | 447    | 460    | 726    | 661    | 777    | 1118   | 1205   | 1183   | 983    | 1115   | 1066   | 948    | 389    | 473    | 646    | 532    | 917    | 793    | 797     | Mtfr2   |
| Mtg1    | 499    | 602    | 490    | 573    | 705    | 627    | 644    | 1189   | 1155   | 1107   | 1116   | 1158   | 1171   | 1213   | 531    | 504    | 549    | 628    | 687    | 706    | 598    | 1091   | 1195   | 1095   | 1229   | 1096   | 1314   | 1102    | Mtg1    |
| Mtg2    | 1136   | 1310   | 1313   | 1529   | 1401   | 1385   | 1450   | 1406   | 1582   | 1701   | 1487   | 1887   | 1718   | 1810   | 1118   | 1178   | 1433   | 1444   | 1572   | 1327   | 1427   | 1684   | 1488   | 1856   | 1812   | 1736   | 1733   | 1774    | Mtg2    |
| Mthfd1  | 5685   | 5999   | 5214   | 4633   | 3742   | 4321   | 4278   | 3418   | 4128   | 3486   | 3367   | 4148   | 3725   | 4174   | 4594   | 5449   | 4723   | 4539   | 4690   | 4570   | 4392   | 2588   | 3700   | 3921   | 3584   | 5070   | 4324   | 4393    | Mthfd1  |
| Mthfd11 | 849    | 730    | 847    | 489    | 430    | 596    | 429    | 900    | 1144   | 915    | 1030   | 1372   | 1335   | 1308   | 721    | 877    | 597    | 517    | 458    | 488    | 470    | 672    | 1016   | 945    | 873    | 1534   | 1499   | 1622    | Mthfd11 |
| Mthfd2  | 2788   | 3312   | 3282   | 2874   | 2072   | 2141   | 2481   | 1467   | 1449   | 1522   | 1522   | 1820   | 1662   | 2119   | 2413   | 3173   | 2982   | 2905   | 2316   | 2521   | 2478   | 1303   | 1377   | 1655   | 1570   | 2192   | 1928   | 2277    | Mthfd2  |
| Mthfd21 | 2197   | 1823   | 1993   | 1745   | 2149   | 2276   | 2454   | 4681   | 3441   | 3064   | 2937   | 3698   | 3390   | 2484   | 1893   | 2000   | 1739   | 2167   | 2625   | 2318   | 3723   | 3281   | 3308   | 3403   | 3599   | 3940   | 3995   | Mthfd21 |         |
| Mthfr   | 4013   | 5053   | 4554   | 4267   | 4183   | 3963   | 3774   | 3712   | 4138   | 4483   | 4186   | 5196   | 5153   | 4886   | 3836   | 4724   | 4400   | 4118   | 4078   | 3919   | 3747   |        |        |        |        |        |        |         |         |



|        |       |       |       |       |       |       |       |       |       |       |       |       |       |       |       |       |       |       |       |       |       |       |       |       |       |       |       |       |        |
|--------|-------|-------|-------|-------|-------|-------|-------|-------|-------|-------|-------|-------|-------|-------|-------|-------|-------|-------|-------|-------|-------|-------|-------|-------|-------|-------|-------|-------|--------|
| Mtres1 | 1523  | 1571  | 1619  | 1707  | 1492  | 1446  | 1617  | 1364  | 1250  | 1237  | 1259  | 1248  | 1377  | 1508  | 1582  | 1421  | 1576  | 1535  | 1372  | 1684  | 1617  | 1216  | 1207  | 1455  | 1235  | 1369  | 1406  | 1556  | Mtres1 |
| Mtrex  | 12913 | 11518 | 11082 | 10628 | 10334 | 10725 | 11707 | 12893 | 10936 | 9731  | 9742  | 11579 | 10743 | 11885 | 13585 | 11946 | 11232 | 10287 | 10689 | 12747 | 11214 | 9778  | 10173 | 9984  | 10407 | 11432 | 11576 | 11824 | Mtrex  |
| Mtrfl  | 253   | 244   | 331   | 266   | 287   | 261   | 273   | 526   | 572   | 487   | 527   | 475   | 550   | 306   | 283   | 324   | 263   | 316   | 355   | 290   | 448   | 570   | 492   | 510   | 513   | 580   | 513   | Mtrfl |        |
| Mtrfl1 | 1193  | 1254  | 1387  | 1375  | 1180  | 1236  | 1301  | 918   | 797   | 872   | 921   | 976   | 792   | 859   | 1166  | 1184  | 1388  | 1425  | 1233  | 1213  | 1244  | 809   | 799   | 956   | 870   | 816   | 820   | 840   | Mtrfl1 |
| Mtrfr  | 1231  | 1389  | 1388  | 1331  | 1149  | 1162  | 1273  | 1247  | 1186  | 1176  | 1237  | 1362  | 1384  | 1323  | 1279  | 1213  | 1498  | 1258  | 1297  | 1349  | 1251  | 951   | 1239  | 1396  | 1378  | 1579  | 1431  | 1442  | Mtrfr  |
| Mtrr   | 866   | 929   | 1049  | 950   | 953   | 871   | 870   | 1321  | 1396  | 1461  | 1457  | 1458  | 1436  | 1445  | 849   | 884   | 1009  | 868   | 861   | 850   | 802   | 1283  | 1350  | 1392  | 1488  | 1559  | 1538  | 1584  | Mtrr   |
| Mtss1  | 5021  | 5283  | 7262  | 8881  | 11277 | 8976  | 10537 | 8230  | 8491  | 11219 | 9275  | 9838  | 8470  | 11207 | 5618  | 5177  | 8408  | 9212  | 10392 | 8527  | 11037 | 11007 | 8230  | 11324 | 13245 | 8678  | 8756  | 9766  | Mtss1  |
| Mtss2  | 2985  | 3901  | 5243  | 4805  | 5938  | 4579  | 3824  | 4993  | 6247  | 7875  | 7314  | 6274  | 5746  | 5295  | 3034  | 3782  | 5420  | 5246  | 5459  | 3795  | 4502  | 8288  | 6361  | 7269  | 7675  | 6940  | 4600  | 5032  | Mtss2  |
| Mttn   | 732   | 796   | 767   | 774   | 705   | 747   | 711   | 862   | 849   | 748   | 748   | 1046  | 951   | 911   | 804   | 684   | 684   | 660   | 683   | 772   | 752   | 857   | 806   | 865   | 751   | 923   | 1033  | 1053  | Mttn   |
| Mtup   | 12469 | 14416 | 11903 | 16727 | 19426 | 17714 | 18529 | 11385 | 10710 | 11477 | 10100 | 9078  | 8934  | 9488  | 14024 | 12495 | 13891 | 17708 | 18727 | 18491 | 20745 | 12673 | 10928 | 10001 | 13540 | 9813  | 8846  | 8626  | Mtup   |
| Mtus1  | 2902  | 2465  | 2607  | 2620  | 3341  | 2875  | 2794  | 5874  | 5676  | 6198  | 5820  | 5786  | 5514  | 6123  | 2846  | 2717  | 2556  | 2803  | 2791  | 2463  | 2831  | 7645  | 5488  | 5878  | 6756  | 5128  | 5492  | 5895  | Mtus1  |
| Mtus2  | 1305  | 2081  | 1604  | 2280  | 3329  | 2599  | 1972  | 3119  | 2838  | 3314  | 3085  | 2344  | 3596  | 2157  | 2301  | 2063  | 2272  | 2476  | 2520  | 2555  | 2374  | 4234  | 2784  | 2320  | 3213  | 1380  | 2280  | 2290  | Mtus2  |
| Mtx1   | 1551  | 1881  | 1905  | 1400  | 1413  | 1335  | 1572  | 2028  | 2146  | 2055  | 1903  | 2388  | 2371  | 2362  | 1429  | 1573  | 1595  | 1389  | 1575  | 1579  | 1411  | 1783  | 2038  | 2268  | 2116  | 2683  | 2563  | 2575  | Mtx1   |
| Mtx2   | 3962  | 3028  | 3342  | 3074  | 3395  | 3102  | 3633  | 5250  | 4447  | 3727  | 3885  | 4192  | 3977  | 4617  | 4221  | 3433  | 3201  | 3166  | 3272  | 3869  | 3470  | 4435  | 4592  | 4191  | 3911  | 4373  | 4113  | 4723  | Mtx2   |
| Mtx3   | 2374  | 1939  | 1695  | 1763  | 2459  | 2376  | 2293  | 6631  | 6138  | 5412  | 6064  | 5843  | 5790  | 6075  | 2480  | 2098  | 1840  | 1872  | 2071  | 2527  | 2277  | 5177  | 5823  | 5112  | 5741  | 4271  | 6450  | 5555  | Mtx3   |
| Muc1   | 532   | 627   | 718   | 648   | 554   | 602   | 536   | 601   | 507   | 699   | 545   | 996   | 798   | 878   | 485   | 461   | 798   | 581   | 697   | 591   | 528   | 690   | 520   | 924   | 824   | 904   | 1004  | 958   | Muc1   |
| Muc13  | 22    | 15    | 34    | 13    | 7     | 10    | 18    | 9     | 19    | 8     | 0     | 20    | 18    | 13    | 16    | 23    | 25    | 31    | 29    | 15    | 24    | 12    | 9     | 12    | 14    | 25    | 7     | 11    | Muc13  |
| Muc15  | 5     | 4     | 0     | 5     | 2     | 0     | 0     | 23    | 37    | 21    | 38    | 0     | 2     | 1     | 4     | 0     | 0     | 0     | 0     | 0     | 0     | 3     | 44    | 9     | 4     | 1     | 0     | 0     | Muc15  |
| Muc16  | 0     | 0     | 0     | 0     | 0     | 0     | 2     | 10    | 7     | 1     | 2     | 0     | 5     | 1     | 4     | 0     | 0     | 1     | 0     | 0     | 0     | 3     | 14    | 4     | 0     | 0     | 0     | 0     | Muc16  |
| Muc2   | 7     | 10    | 3     | 5     | 5     | 5     | 0     | 7     | 2     | 0     | 1     | 0     | 5     | 0     | 4     | 3     | 0     | 2     | 5     | 3     | 1     | 3     | 1     | 0     | 1     | 0     | 0     | 0     | Muc2   |
| Muc20  | 1     | 1     | 0     | 0     | 0     | 3     | 2     | 0     | 7     | 9     | 15    | 1     | 0     | 0     | 5     | 3     | 2     | 0     | 5     | 5     | 3     | 3     | 7     | 3     | 6     | 7     | 2     | 1     | Muc20  |
| Muc21  | 0     | 0     | 0     | 0     | 0     | 0     | 0     | 0     | 1     | 2     | 0     | 0     | 0     | 0     | 0     | 0     | 0     | 0     | 0     | 0     | 0     | 0     | 0     | 0     | 0     | 0     | 0     | 0     | Muc21  |
| Muc3   | 0     | 0     | 0     | 0     | 0     | 0     | 0     | 0     | 0     | 0     | 0     | 1     | 0     | 1     | 0     | 1     | 0     | 2     | 0     | 0     | 0     | 0     | 0     | 4     | 0     | 0     | 0     | 0     | Muc3   |
| Muc3a  | 14    | 17    | 12    | 25    | 54    | 54    | 35    | 15    | 18    | 6     | 20    | 3     | 23    | 12    | 20    | 15    | 23    | 26    | 49    | 33    | 39    | 38    | 19    | 21    | 23    | 12    | 21    | 9     | Muc3a  |
| Muc5ac | 0     | 1     | 0     | 0     | 0     | 1     | 0     | 0     | 0     | 0     | 2     | 0     | 0     | 0     | 1     | 0     | 0     | 1     | 0     | 0     | 2     | 0     | 0     | 2     | 0     | 0     | 0     | 0     | Muc5ac |
| Muc5b  | 0     | 0     | 0     | 0     | 0     | 0     | 1     | 0     | 0     | 0     | 0     | 0     | 0     | 0     | 0     | 0     | 0     | 0     | 0     | 0     | 1     | 2     | 1     | 0     | 0     | 0     | 0     | 0     | Muc5b  |
| Muc3   | 27    | 39    | 50    | 36    | 15    | 37    | 18    | 16    | 28    | 7     | 8     | 20    | 35    | 14    | 32    | 40    | 39    | 28    | 22    | 25    | 17    | 20    | 30    | 14    | 18    | 15    | 20    | 20    | Muc3   |
| Mug1   | 0     | 0     | 0     | 0     | 0     | 0     | 0     | 0     | 2     | 0     | 0     | 0     | 1     | 1     | 3     | 2     | 3     | 0     | 0     | 0     | 0     | 0     | 0     | 0     | 0     | 0     | 0     | 0     | Mug1   |
| Mug2   | 0     | 0     | 0     | 0     | 0     | 0     | 0     | 1     | 0     | 0     | 0     | 0     | 0     | 0     | 0     | 0     | 0     | 0     | 0     | 0     | 0     | 0     | 0     | 0     | 0     | 0     | 0     | 0     | Mug2   |
| Mu1    | 3054  | 3886  | 3546  | 3601  | 2971  | 3215  | 2808  | 1917  | 2053  | 2206  | 2193  | 2430  | 2276  | 2201  | 2769  | 3292  | 3610  | 3681  | 3600  | 2705  | 3095  | 2080  | 2208  | 2416  | 2393  | 2409  | 2374  | 2504  | Mu1    |
| Mup12  | 0     | 0     | 0     | 0     | 0     | 0     | 0     | 0     | 0     | 0     | 0     | 0     | 0     | 0     | 0     | 0     | 0     | 0     | 0     | 0     | 0     | 0     | 0     | 0     | 0     | 0     | 0     | 0     | Mup12  |
| Mup15  | 0     | 0     | 5     | 0     | 0     | 0     | 0     | 0     | 0     | 0     | 0     | 0     | 0     | 0     | 0     | 0     | 0     | 0     | 0     | 0     | 0     | 0     | 2     | 0     | 0     | 0     | 0     | 0     | Mup15  |
| Mup18  | 0     | 0     | 1     | 0     | 0     | 0     | 0     | 0     | 0     | 0     | 0     | 0     | 0     | 0     | 0     | 0     | 0     | 0     | 0     | 0     | 0     | 0     | 0     | 0     | 0     | 0     | 0     | 0     | Mup18  |
| Mup21  | 0     | 0     | 0     | 0     | 0     | 0     | 2     | 0     | 0     | 0     | 1     | 1     | 0     | 0     | 0     | 0     | 1     | 1     | 0     | 2     | 5     | 0     | 0     | 0     | 0     | 0     | 0     | 1     | Mup21  |
| Mup4   | 0     | 0     | 0     | 0     | 0     | 0     | 0     | 0     | 0     | 0     | 0     | 0     | 0     | 0     | 0     | 0     | 0     | 0     | 0     | 0     | 0     | 0     | 1     | 0     | 0     | 0     | 0     | 0     | Mup4   |
| Mup5   | 0     | 0     | 0     | 0     | 0     | 0     | 0     | 0     | 2     | 0     | 0     | 0     | 0     | 0     | 0     | 0     | 0     | 0     | 0     | 0     | 0     | 0     | 2     | 0     | 0     | 0     | 0     | 0     | Mup5   |
| Mup6   | 1     | 0     | 0     | 0     | 2     | 0     | 2     | 0     | 2     | 0     | 0     | 2     | 0     | 1     | 1     | 0     | 0     | 3     | 0     | 0     | 2     | 0     | 1     | 1     | 0     | 0     | 6     | 0     | Mup6   |
| Mup8   | 0     | 0     | 0     | 0     | 0     | 0     | 0     | 0     | 0     | 0     | 0     | 0     | 0     | 2     | 0     | 0     | 0     | 0     | 0     | 0     | 0     | 2     | 0     | 0     | 0     | 0     | 0     | 0     | Mup8   |
| Mus81  | 1096  | 1387  | 1372  | 1263  | 1289  | 1185  | 1154  | 1225  | 1550  | 1448  | 1381  | 1547  | 1585  | 1407  | 1030  | 1137  | 1365  | 1129  | 1364  | 1143  | 1128  | 1260  | 1496  | 1565  | 1506  | 1570  | 1730  | 1543  | Mus81  |
| Musk   | 5     | 1     | 0     | 1     | 3     | 0     | 1     | 21    | 30    | 6     | 196   | 4     | 18    | 0     | 7     | 8     | 0     | 4     | 0     | 0     | 1     | 18    | 145   | 9     | 2     | 0     | 0     | 4     | Musk   |
| Mustn1 | 67    | 72    | 75    | 83    | 69    | 88    | 82    | 37    | 73    | 87    | 218   | 77    | 73    | 73    | 42    | 66    | 114   | 85    | 94    | 66    | 78    | 70    | 148   | 39    | 64    | 78    | 51    | 63    | Mustn1 |
| Mutyh  | 798   | 1088  | 1147  | 941   | 696   | 788   | 893   | 567   | 582   | 615   | 628   | 843   | 841   | 822   | 798   | 951   | 1160  | 987   | 879   | 852   | 836   | 526   | 553   | 797   | 720   | 1043  | 912   | 859   | Mutyh  |
| Mvb12a | 1863  | 2265  | 2048  | 2174  | 1767  | 1848  | 1781  | 1097  | 1234  | 1288  | 1294  | 1105  | 1148  | 1109  | 1733  | 1995  | 1962  | 1898  | 1858  | 1950  | 1793  | 1105  | 1258  | 1226  | 1128  | 1260  | 1246  | 1133  | Mvb12a |
| Mvb12b | 3878  | 4763  | 5316  | 6254  | 8313  | 7113  | 6700  | 8921  | 11081 | 13337 | 11143 | 13889 | 10989 | 12435 | 4187  | 4072  | 6574  | 7017  | 8361  | 5816  | 7296  | 14165 | 9910  | 13615 | 15024 | 11890 | 11201 | 11759 | Mvb12b |
| Mvd    | 3180  | 4790  | 3506  | 3628  | 2977  | 2961  | 2779  | 1595  | 1864  | 1767  | 1589  | 2043  | 1975  | 1924  | 3098  | 3798  | 3683  | 3422  | 3065  | 3205  | 3004  | 1492  | 1739  | 1824  | 1840  | 2086  | 2167  | 1977  | Mvd    |
| Mvk    | 3517  | 4753  | 3897  | 4336  | 3175  | 3389  | 3284  | 1697  | 1986  | 2087  | 1981  | 2332  | 2169  | 2196  | 3368  | 3851  | 4224  | 3988  | 3921  | 3053  | 3354  | 1778  | 1895  | 2030  | 2153  | 2646  | 2401  | 2432  | Mvk    |
| Mvp    | 771   | 1044  | 920   | 900   | 900   | 846   | 698   | 425   | 502   | 570   | 583   | 526   | 607   | 475   | 775   | 1063  | 956   | 907   | 782   | 777   | 711   | 535   | 606   | 541   | 587   | 640   | 538   | 589   | Mvp    |
| Mxd1   | 3486  | 4534  | 4489  | 5854  | 4350  | 4296  | 4347  | 2202  | 2148  | 2520  | 2427  | 2565  | 2554  | 2754  | 3600  | 4414  | 5124  | 5698  | 4601  | 3694  | 4790  | 2954  | 2043  | 2756  | 2809  | 2414  | 2477  | 2599  | Mxd1   |
| Mxd3   | 1331  | 1697  | 1394  | 1459  | 1018  | 1194  | 1206  | 849   | 1104  | 922   | 933   | 1423  | 1065  | 1376  | 1058  | 1241  | 1468  | 1150  | 1387  | 1189  | 1199  | 729   | 940   | 1300  | 1138  | 1694  | 1463  | 1486  | Mxd3   |
| Mxd4   | 6938  | 7571  | 6175  | 7067  | 7646  | 7598  | 6602  | 7989  | 8688  | 8281  | 8741  | 7256  | 7515  | 6813  | 6699  | 7330  | 6234  | 7341  | 7455  | 7033  | 7258  | 8560  | 9100  | 7696  | 8232  | 6481  | 7201  | 6899  | Mxd4   |
| Mxa1   | 5482  | 5816  | 6163  | 6913  | 6953  | 6015  | 7013  | 4321  | 3845  | 4671  | 4080  | 4612  | 4216  | 5084  | 5743  | 5475  | 6889  | 6763  | 7066  | 5901  | 7133  | 4909  | 3832  | 4837  | 4918  | 4798  | 4040  | 4905  | Mxa1   |
| Mxa7   | 3029  | 3736  | 4102  | 3786  | 3244  | 3036  | 2617  | 1596  | 1595  | 1751  | 1902  | 1717  | 2210  | 1619  | 3223  | 3541  | 4115  | 3394  | 3274  | 2733  | 2792  | 1863  | 1821  | 1649  | 1539  | 1632  | 1902  | 1886  | Mxa7   |
| Mxa8   | 1546  | 1911  | 1779  | 1299  | 1121  | 1136  | 921   | 954   | 1201  | 1193  | 1703  | 1180  | 1401  | 1110  |       |       |       |       |       |       |       |       |       |       |       |       |       |       |        |

|        |       |       |       |       |       |       |       |       |       |       |       |       |       |       |       |       |       |       |       |       |       |       |       |       |       |       |       |       |        |      |
|--------|-------|-------|-------|-------|-------|-------|-------|-------|-------|-------|-------|-------|-------|-------|-------|-------|-------|-------|-------|-------|-------|-------|-------|-------|-------|-------|-------|-------|--------|------|
| Myh10  | 46332 | 47225 | 40582 | 39225 | 39310 | 43114 | 40629 | 40961 | 46326 | 46788 | 46522 | 51260 | 50018 | 52672 | 44179 | 50785 | 40026 | 39078 | 38071 | 38788 | 40682 | 37578 | 43851 | 45543 | 47604 | 34156 | 53461 | 49434 | Myh10  |      |
| Myh11  | 120   | 133   | 112   | 90    | 133   | 112   | 65    | 107   | 174   | 150   | 435   | 168   | 178   | 166   | 166   | 147   | 83    | 138   | 47    | 66    | 77    | 149   | 261   | 112   | 113   | 67    | 138   | 125   | Myh11  |      |
| Myh13  | 1     | 5     | 0     | 4     | 3     | 7     | 0     | 13    | 7     | 12    | 18    | 8     | 10    | 9     | 8     | 5     | 6     | 4     | 1     | 2     | 15    | 17    | 2     | 7     | 6     | 1     | 2     | Myh13 |        |      |
| Myh14  | 855   | 724   | 697   | 810   | 558   | 513   | 362   | 821   | 889   | 985   | 582   | 342   | 421   | 346   | 582   | 747   | 641   | 664   | 458   | 331   | 398   | 374   | 967   | 1096  | 247   | 773   | 272   | 350   | Myh14  |      |
| Myh15  | 2     | 5     | 7     | 11    | 12    | 3     | 8     | 13    | 15    | 14    | 21    | 29    | 20    | 20    | 7     | 5     | 5     | 7     | 9     | 7     | 14    | 30    | 16    | 11    | 23    | 10    | 2     | 12    | Myh15  |      |
| Myh2   | 9     | 7     | 0     | 2     | 1     | 15    | 1     | 16    | 12    | 10    | 5     | 26    | 9     | 31    | 8     | 6     | 7     | 8     | 0     | 0     | 1     | 7     | 27    | 18    | 10    | 8     | 22    | 19    | Myh2   |      |
| Myh3   | 782   | 126   | 103   | 62    | 160   | 92    | 61    | 1387  | 3374  | 444   | 24153 | 168   | 718   | 112   | 343   | 769   | 123   | 103   | 51    | 72    | 47    | 2069  | 15444 | 462   | 342   | 81    | 152   | 112   | Myh3   |      |
| Myh4   | 0     | 1     | 0     | 0     | 0     | 2     | 1     | 1     | 12    | 0     | 24    | 3     | 10    | 11    | 5     | 1     | 0     | 6     | 3     | 0     | 0     | 0     | 12    | 1     | 1     | 3     | 3     | 5     | Myh4   |      |
| Myh6   | 7     | 15    | 9     | 13    | 7     | 9     | 6     | 15    | 22    | 28    | 86    | 16    | 23    | 9     | 11    | 9     | 6     | 12    | 16    | 4     | 5     | 22    | 84    | 7     | 7     | 10    | 7     | 20    | Myh6   |      |
| Myh7   | 100   | 79    | 65    | 65    | 119   | 126   | 130   | 249   | 545   | 203   | 3396  | 151   | 170   | 117   | 86    | 86    | 56    | 109   | 148   | 111   | 112   | 388   | 2113  | 192   | 258   | 90    | 102   | 97    | Myh7   |      |
| Myh7b  | 51    | 58    | 50    | 103   | 55    | 50    | 54    | 46    | 111   | 32    | 669   | 40    | 57    | 50    | 62    | 64    | 81    | 96    | 52    | 50    | 67    | 112   | 449   | 52    | 38    | 41    | 34    | 75    | Myh7b  |      |
| Myh8   | 172   | 93    | 8     | 245   | 184   | 354   | 23    | 625   | 1280  | 446   | 7321  | 162   | 413   | 219   | 138   | 150   | 43    | 285   | 38    | 265   | 43    | 1096  | 6019  | 304   | 446   | 30    | 145   | 84    | Myh8   |      |
| Myh9   | 21465 | 23766 | 26425 | 19199 | 15230 | 16738 | 13133 | 10828 | 15677 | 14698 | 15460 | 15940 | 18012 | 14262 | 18980 | 28264 | 20240 | 20051 | 15543 | 12477 | 13897 | 11640 | 16106 | 15874 | 12618 | 13846 | 15651 | 14987 | Myh9   |      |
| My1    | 228   | 127   | 60    | 151   | 106   | 116   | 141   | 172   | 522   | 61    | 4025  | 46    | 78    | 20    | 135   | 213   | 127   | 182   | 102   | 182   | 128   | 361   | 2614  | 55    | 46    | 17    | 16    | 17    | My1    |      |
| My10   | 0     | 1     | 0     | 0     | 0     | 0     | 0     | 0     | 0     | 0     | 0     | 2     | 0     | 0     | 0     | 0     | 0     | 0     | 0     | 0     | 0     | 0     | 0     | 0     | 0     | 0     | 0     | 0     | 0      | My10 |
| My112a | 2962  | 2553  | 2673  | 2247  | 1247  | 1541  | 1960  | 1893  | 1668  | 2018  | 2347  | 1811  | 2068  | 2822  | 2658  | 2109  | 2292  | 1906  | 1439  | 1347  | 1854  | 1288  | 2043  | 2331  | 1532  | 2333  | 1963  | 2839  | My112a |      |
| My112b | 414   | 391   | 428   | 455   | 407   | 381   | 445   | 282   | 246   | 305   | 272   | 300   | 228   | 258   | 394   | 371   | 414   | 448   | 381   | 341   | 449   | 314   | 217   | 286   | 287   | 293   | 246   | 284   | My112b |      |
| My12   | 6     | 4     | 0     | 13    | 6     | 1     | 6     | 5     | 15    | 14    | 38    | 3     | 8     | 4     | 1     | 2     | 0     | 3     | 8     | 3     | 4     | 3     | 34    | 3     | 9     | 8     | 6     | 4     | My12   |      |
| My13   | 12    | 8     | 10    | 13    | 4     | 19    | 8     | 2     | 12    | 12    | 114   | 4     | 3     | 4     | 11    | 5     | 12    | 4     | 9     | 8     | 3     | 17    | 63    | 12    | 5     | 10    | 17    | 9     | My13   |      |
| My14   | 84    | 19    | 16    | 21    | 49    | 25    | 30    | 171   | 427   | 91    | 2963  | 51    | 115   | 42    | 42    | 108   | 19    | 36    | 34    | 44    | 24    | 284   | 1794  | 93    | 114   | 38    | 29    | 40    | My14   |      |
| My16   | 15873 | 19274 | 19677 | 17791 | 15190 | 15840 | 14098 | 14880 | 17793 | 16274 | 18622 | 15854 | 18081 | 17483 | 17392 | 18580 | 17891 | 16995 | 16096 | 18343 | 15305 | 13017 | 19821 | 17416 | 16471 | 18280 | 18914 | 17836 | My16   |      |
| My16b  | 679   | 963   | 1206  | 1273  | 1410  | 1118  | 1057  | 579   | 687   | 729   | 1440  | 752   | 539   | 645   | 769   | 768   | 1176  | 1326  | 1467  | 956   | 1230  | 824   | 1043  | 754   | 768   | 692   | 624   | 660   | My16b  |      |
| My17   | 8     | 8     | 12    | 9     | 4     | 11    | 3     | 11    | 4     | 7     | 7     | 2     | 6     | 6     | 3     | 6     | 15    | 10    | 5     | 6     | 9     | 8     | 9     | 7     | 7     | 12    | 6     | 12    | My17   |      |
| My19   | 3159  | 4185  | 3073  | 1558  | 716   | 1689  | 541   | 1875  | 2399  | 1776  | 2440  | 2717  | 4017  | 2651  | 3579  | 4480  | 2322  | 1755  | 658   | 739   | 560   | 1355  | 3012  | 2105  | 1500  | 2956  | 3488  | 2899  | My19   |      |
| My1p   | 2425  | 2129  | 1848  | 1627  | 1040  | 1219  | 905   | 1627  | 1819  | 1547  | 1760  | 1048  | 1707  | 1054  | 1902  | 2751  | 1446  | 1782  | 830   | 961   | 834   | 1419  | 2001  | 1478  | 1037  | 1622  | 1175  | 1117  | My1p   |      |
| Myk    | 1955  | 1574  | 2157  | 1562  | 1485  | 1652  | 1189  | 1784  | 2002  | 2048  | 2223  | 1891  | 2067  | 1915  | 1617  | 2082  | 1659  | 1763  | 1236  | 1256  | 1265  | 1973  | 2159  | 2012  | 1693  | 1766  | 2158  | 1837  | Myk    |      |
| Myk2   | 0     | 6     | 1     | 3     | 3     | 1     | 0     | 1     | 2     | 0     | 3     | 0     | 7     | 2     | 4     | 8     | 1     | 0     | 4     | 1     | 1     | 2     | 3     | 2     | 4     | 3     | 2     | 2     | Myk2   |      |
| Myk3   | 72    | 91    | 71    | 46    | 21    | 26    | 42    | 61    | 102   | 46    | 62    | 62    | 260   | 118   | 65    | 90    | 53    | 50    | 57    | 44    | 39    | 32    | 98    | 42    | 56    | 120   | 130   | 253   | Myk3   |      |
| Myk4   | 59    | 7     | 9     | 19    | 34    | 34    | 20    | 107   | 246   | 45    | 1354  | 25    | 76    | 35    | 30    | 49    | 23    | 17    | 21    | 16    | 16    | 167   | 769   | 27    | 41    | 18    | 29    | 24    | Myk4   |      |
| Myjpf  | 337   | 317   | 327   | 340   | 181   | 222   | 245   | 372   | 739   | 155   | 5109  | 138   | 237   | 170   | 306   | 343   | 401   | 215   | 242   | 264   | 264   | 480   | 3163  | 203   | 187   | 151   | 157   | 151   | Myjpf  |      |
| Mykm   | 15    | 3     | 0     | 0     | 0     | 2     | 1     | 44    | 110   | 16    | 558   | 1     | 18    | 1     | 5     | 14    | 0     | 0     | 4     | 0     | 0     | 55    | 326   | 7     | 4     | 2     | 0     | 0     | Mykm   |      |
| Myxm   | 9     | 1     | 1     | 0     | 2     | 2     | 0     | 15    | 42    | 7     | 245   | 3     | 14    | 2     | 5     | 4     | 0     | 4     | 4     | 3     | 0     | 28    | 104   | 2     | 5     | 0     | 0     | 2     | Myxm   |      |
| Myxn   | 4076  | 3682  | 3624  | 3974  | 3415  | 3635  | 3853  | 4183  | 3510  | 3025  | 3165  | 3140  | 3336  | 3412  | 4337  | 3840  | 3612  | 3700  | 3418  | 4249  | 3738  | 3272  | 3538  | 3097  | 3354  | 3126  | 3546  | 3400  | Myxn   |      |
| Myo10  | 6125  | 6312  | 7037  | 6371  | 5938  | 5928  | 5152  | 5516  | 6082  | 6573  | 6116  | 8939  | 7235  | 8495  | 5300  | 6506  | 7121  | 6254  | 6255  | 4514  | 5306  | 6201  | 5124  | 7881  | 7027  | 6662  | 8623  | 8183  | Myo10  |      |
| Myo15  | 33    | 56    | 44    | 31    | 36    | 43    | 26    | 22    | 72    | 62    | 69    | 28    | 42    | 36    | 51    | 43    | 36    | 57    | 30    | 47    | 23    | 79    | 65    | 56    | 30    | 31    | 38    | 58    | Myo15  |      |
| Myo15b | 105   | 113   | 64    | 55    | 23    | 27    | 22    | 10    | 40    | 35    | 29    | 26    | 36    | 21    | 83    | 171   | 52    | 77    | 17    | 12    | 13    | 10    | 34    | 16    | 5     | 24    | 12    | 27    | Myo15b |      |
| Myo16  | 1246  | 1395  | 1962  | 2406  | 3274  | 2736  | 2514  | 1856  | 2038  | 2763  | 2204  | 2175  | 2101  | 1951  | 1509  | 1541  | 2301  | 2516  | 2953  | 2087  | 2927  | 3472  | 1858  | 2174  | 2847  | 1213  | 1935  | 1924  | Myo16  |      |
| Myo18a | 7250  | 9211  | 9783  | 12464 | 13918 | 12786 | 11624 | 9928  | 12133 | 15492 | 13548 | 14885 | 12957 | 13792 | 8060  | 8360  | 11323 | 12327 | 14555 | 9920  | 13222 | 15047 | 11034 | 15111 | 16166 | 10059 | 13919 | 13610 | Myo18a |      |
| Myo18b | 150   | 163   | 234   | 269   | 202   | 181   | 206   | 231   | 249   | 284   | 844   | 276   | 243   | 202   | 189   | 150   | 221   | 265   | 243   | 221   | 217   | 311   | 524   | 233   | 280   | 137   | 199   | 241   | Myo18b |      |
| Myo19  | 1993  | 2135  | 2081  | 2121  | 2621  | 2455  | 2171  | 2172  | 2088  | 2380  | 2381  | 2502  | 2431  | 2333  | 1911  | 2046  | 2248  | 2437  | 2533  | 2158  | 2151  | 2373  | 2026  | 2223  | 2380  | 2088  | 2487  | 2451  | Myo19  |      |
| Myo1a  | 742   | 1179  | 1120  | 1508  | 962   | 1001  | 1059  | 142   | 171   | 201   | 196   | 161   | 212   | 717   | 1081  | 1235  | 1544  | 1078  | 852   | 1129  | 187   | 150   | 235   | 201   | 190   | 196   | 234   | Myo1a |        |      |
| Myo1b  | 8304  | 6956  | 7440  | 6549  | 6535  | 8258  | 7813  | 16908 | 14514 | 14249 | 14011 | 17643 | 16577 | 18142 | 8207  | 7520  | 7181  | 6983  | 7511  | 8221  | 7612  | 13714 | 13512 | 15522 | 15932 | 16252 | 18300 | 17631 | Myo1b  |      |
| Myo1c  | 2895  | 3085  | 3371  | 2589  | 2226  | 2649  | 1769  | 2149  | 3214  | 2726  | 3594  | 2360  | 2855  | 2172  | 2651  | 3396  | 2650  | 2838  | 2230  | 1761  | 1896  | 2172  | 3625  | 2867  | 2275  | 2496  | 2561  | 2530  | Myo1c  |      |
| Myo1d  | 746   | 621   | 567   | 489   | 453   | 442   | 372   | 390   | 524   | 558   | 528   | 362   | 573   | 351   | 625   | 859   | 477   | 573   | 397   | 300   | 352   | 321   | 539   | 471   | 304   | 478   | 342   | 414   | Myo1d  |      |
| Myo1e  | 5488  | 5433  | 5608  | 4869  | 4493  | 4500  | 4174  | 1456  | 1528  | 1561  | 1596  | 1290  | 1613  | 1285  | 5417  | 5733  | 5110  | 4908  | 4244  | 3741  | 4353  | 1273  | 1840  | 1421  | 1282  | 1580  | 1302  | 1519  | Myo1e  |      |
| Myo1f  | 1448  | 157   | 149   | 148   | 114   | 157   | 104   | 167   | 262   | 232   | 305   | 193   | 210   | 185   | 164   | 204   | 122   | 158   | 94    | 111   | 122   | 194   | 326   | 192   | 180   | 240   | 187   | 189   | Myo1f  |      |
| Myo1g  | 30    | 52    | 53    | 30    | 34    | 25    | 42    | 45    | 91    | 65    | 87    | 39    | 78    | 46    | 51    | 48    | 29    | 32    | 27    | 36    | 44    | 20    | 100   | 48    | 41    | 65    | 70    | 52    | Myo1g  |      |
| Myo1h  | 146   | 74    | 31    | 87    | 29    | 22    | 12    | 107   | 107   | 147   | 145   | 48    | 74    | 65    | 57    | 136   | 50    | 25    | 29    | 38    | 21    | 77    | 138   | 196   | 44    | 195   | 56    | 44    | Myo1h  |      |
| Myo3a  | 10    | 14    | 6     | 18    | 16    | 17    | 22    | 13    | 10    | 17    | 9     | 11    | 7     | 19    | 8     | 5     | 20    | 10    | 12    | 16    | 14    | 25    | 13    | 10    | 18    | 8     | 7     | 5     | Myo3a  |      |
| Myo3b  | 48    | 52    | 23    | 65    | 93    | 71    | 104   | 71    | 77    | 72    | 48    | 71    | 34    | 50    | 63    | 28    | 49    | 72    | 62    | 78    | 91    | 48    | 60    | 52    | 68    | 39    | 26    | 27    | Myo3b  |      |
| Myo5a  | 14239 | 13084 | 9025  | 13499 | 19052 | 20052 | 19427 | 22815 | 21388 | 20236 | 19734 | 20670 | 20420 | 21613 | 16016 | 13478 | 11603 | 14051 | 15195 | 18044 | 19762 | 20501 | 19004 | 15864 | 23553 | 12800 | 21599 | 18260 | Myo5a  |      |
| Myo5b  | 538   | 301   | 189   | 235   |       |       |       |       |       |       |       |       |       |       |       |       |       |       |       |       |       |       |       |       |       |       |       |       |        |      |

|         |       |       |       |       |       |       |       |       |       |       |       |       |       |       |       |       |       |       |       |       |       |       |       |       |       |       |       |       |         |      |
|---------|-------|-------|-------|-------|-------|-------|-------|-------|-------|-------|-------|-------|-------|-------|-------|-------|-------|-------|-------|-------|-------|-------|-------|-------|-------|-------|-------|-------|---------|------|
| Myt11   | 2795  | 2972  | 1795  | 6468  | 11869 | 9439  | 9626  | 10273 | 10756 | 12207 | 9584  | 6695  | 5816  | 7309  | 3745  | 2583  | 3970  | 7850  | 8743  | 9072  | 10687 | 13665 | 9182  | 8618  | 13245 | 3496  | 5187  | 5038  | Myt11   |      |
| Myzap   | 824   | 657   | 751   | 478   | 467   | 412   | 343   | 377   | 527   | 330   | 1316  | 358   | 460   | 293   | 767   | 969   | 553   | 515   | 341   | 466   | 355   | 506   | 1017  | 345   | 328   | 318   | 365   | 267   | Myzap   |      |
| Mzb1    | 37    | 57    | 59    | 62    | 55    | 40    | 40    | 13    | 26    | 25    | 15    | 14    | 16    | 9     | 34    | 58    | 57    | 62    | 53    | 67    | 55    | 20    | 28    | 13    | 19    | 24    | 23    | 23    | Mzb1    |      |
| Mzf1    | 150   | 149   | 128   | 148   | 201   | 160   | 197   | 663   | 712   | 761   | 655   | 764   | 703   | 846   | 115   | 121   | 172   | 191   | 235   | 182   | 230   | 866   | 663   | 789   | 878   | 624   | 752   | 706   | Mzf1    |      |
| Mzt1    | 9244  | 6714  | 9494  | 9245  | 9001  | 8731  | 11035 | 8160  | 6448  | 6182  | 6574  | 8275  | 7667  | 8730  | 9911  | 8233  | 9503  | 8871  | 8970  | 9784  | 9463  | 7543  | 6745  | 7865  | 679   | 879   | 8825  | 8212  | 8984    | Mzt1 |
| Mz2     | 1022  | 1155  | 1174  | 1177  | 1001  | 1037  | 1048  | 863   | 881   | 844   | 802   | 925   | 917   | 925   | 1015  | 913   | 1270  | 1030  | 1169  | 1210  | 1097  | 734   | 817   | 942   | 984   | 1195  | 1051  | 974   | Mz2     |      |
| N4bp1   | 5890  | 6372  | 6591  | 6984  | 6632  | 6677  | 6453  | 5503  | 5279  | 5925  | 5735  | 6202  | 5757  | 6213  | 5459  | 6400  | 6880  | 7064  | 6830  | 5926  | 6741  | 6328  | 5066  | 5765  | 6212  | 5293  | 5625  | 6172  | N4bp1   |      |
| N4bp2   | 9184  | 6851  | 6707  | 7152  | 8395  | 8961  | 8843  | 13080 | 11839 | 11345 | 12777 | 12475 | 12295 | 13678 | 8790  | 7881  | 7098  | 6728  | 7816  | 8324  | 8723  | 11003 | 11202 | 10856 | 12250 | 9466  | 13345 | 12448 | N4bp2   |      |
| N4bp211 | 774   | 841   | 673   | 934   | 1195  | 1205  | 1214  | 488   | 456   | 499   | 469   | 406   | 354   | 409   | 829   | 868   | 781   | 1081  | 1010  | 1057  | 1262  | 566   | 482   | 416   | 498   | 318   | 384   | 291   | N4bp211 |      |
| N4bp212 | 6496  | 4900  | 4975  | 5548  | 4982  | 5891  | 5618  | 8563  | 7412  | 6278  | 6743  | 6774  | 6813  | 7083  | 6381  | 5583  | 5079  | 5140  | 5093  | 6225  | 5728  | 6916  | 7426  | 6326  | 6934  | 6469  | 7145  | 7202  | N4bp212 |      |
| N4bp3   | 704   | 797   | 828   | 733   | 604   | 602   | 393   | 442   | 707   | 562   | 809   | 472   | 577   | 421   | 626   | 787   | 695   | 603   | 705   | 636   | 520   | 546   | 845   | 545   | 422   | 510   | 463   | 465   | N4bp3   |      |
| N6amt1  | 400   | 278   | 405   | 375   | 427   | 411   | 360   | 1391  | 1416  | 1544  | 1609  | 1564  | 1593  | 1581  | 392   | 357   | 391   | 288   | 393   | 362   | 399   | 1288  | 1533  | 1439  | 1460  | 1606  | 1557  | 1669  | N6amt1  |      |
| Naa10   | 1015  | 1124  | 1181  | 1077  | 907   | 841   | 1123  | 1058  | 998   | 1275  | 1109  | 1233  | 1258  | 1527  | 885   | 849   | 1148  | 913   | 948   | 894   | 989   | 1034  | 880   | 1325  | 1198  | 1384  | 1174  | 1520  | Naa10   |      |
| Naa11   | 0     | 2     | 0     | 2     | 0     | 0     | 0     | 0     | 0     | 0     | 0     | 0     | 0     | 0     | 0     | 0     | 0     | 2     | 1     | 0     | 1     | 0     | 0     | 0     | 0     | 0     | 0     | 1     | Naa11   |      |
| Naa12   | 4988  | 5712  | 5210  | 4594  | 4444  | 4748  | 4609  | 5296  | 5609  | 5161  | 4854  | 5670  | 5402  | 5531  | 5061  | 4865  | 4968  | 4554  | 4695  | 4859  | 4645  | 4645  | 5237  | 5244  | 5144  | 5991  | 5771  | 5906  | Naa12   |      |
| Naa15   | 16067 | 12265 | 16571 | 15538 | 14550 | 16028 | 17267 | 15997 | 13867 | 14124 | 13922 | 17167 | 16113 | 17599 | 15875 | 14792 | 15445 | 14876 | 15322 | 15316 | 16038 | 14962 | 13297 | 14833 | 15289 | 17093 | 17648 | 17709 | Naa15   |      |
| Naa16   | 1878  | 1488  | 1653  | 1760  | 1595  | 1763  | 1797  | 2396  | 1973  | 2021  | 2066  | 2465  | 2269  | 2483  | 1770  | 1883  | 1417  | 1799  | 1569  | 1761  | 1841  | 2042  | 1963  | 2229  | 2173  | 2440  | 2446  | 2302  | Naa16   |      |
| Naa20   | 4315  | 3568  | 3935  | 3628  | 3190  | 3592  | 3660  | 3644  | 3154  | 2960  | 2949  | 2876  | 2944  | 3216  | 4163  | 3833  | 3657  | 3518  | 3546  | 3937  | 3597  | 2924  | 3219  | 3064  | 3001  | 3386  | 3033  | 3418  | Naa20   |      |
| Naa25   | 7128  | 7283  | 5849  | 6535  | 6356  | 6657  | 6805  | 7100  | 6214  | 5818  | 5458  | 5205  | 5746  | 5957  | 7483  | 6542  | 6098  | 6162  | 6266  | 7293  | 6664  | 5892  | 6055  | 5632  | 6059  | 5300  | 6295  | 5972  | Naa25   |      |
| Naa30   | 6085  | 4130  | 7033  | 7164  | 6383  | 6225  | 6735  | 5267  | 4331  | 4818  | 5079  | 6533  | 5071  | 5666  | 5946  | 5650  | 6545  | 6792  | 6842  | 5647  | 6524  | 6244  | 4447  | 5069  | 5538  | 5319  | 5619  | 5660  | Naa30   |      |
| Naa35   | 12441 | 11796 | 10724 | 11020 | 10226 | 10456 | 11736 | 10698 | 8979  | 8594  | 8018  | 9799  | 8843  | 10064 | 12552 | 10758 | 11426 | 10652 | 10841 | 11531 | 11689 | 9311  | 8714  | 9323  | 9451  | 9965  | 9798  | 9894  | Naa35   |      |
| Naa38   | 664   | 880   | 862   | 672   | 588   | 501   | 723   | 686   | 799   | 835   | 897   | 805   | 905   | 949   | 608   | 584   | 767   | 601   | 617   | 690   | 692   | 561   | 827   | 881   | 828   | 1002  | 1006  | 1041  | Naa38   |      |
| Naa40   | 5986  | 6633  | 6823  | 6418  | 6047  | 5901  | 6373  | 5152  | 5267  | 5418  | 5179  | 6429  | 5917  | 6407  | 5988  | 6162  | 6714  | 6241  | 6438  | 5761  | 6212  | 5566  | 5014  | 5806  | 5811  | 6572  | 6422  | 6501  | Naa40   |      |
| Naa50   | 17347 | 11593 | 18627 | 16916 | 14022 | 15573 | 17577 | 11031 | 9501  | 9260  | 11208 | 11870 | 11329 | 12965 | 16736 | 15421 | 16314 | 16437 | 15047 | 15158 | 16437 | 10358 | 10248 | 11212 | 10567 | 14374 | 12411 | 14010 | Naa50   |      |
| Naa60   | 2833  | 3105  | 2869  | 2896  | 3236  | 2903  | 3180  | 2558  | 2759  | 2910  | 2997  | 3072  | 2694  | 2995  | 2701  | 2921  | 3002  | 3083  | 3074  | 2593  | 3040  | 3133  | 2790  | 2939  | 2905  | 3124  | 2725  | 2912  | Naa60   |      |
| Naa80   | 546   | 726   | 667   | 521   | 520   | 541   | 425   | 613   | 732   | 663   | 616   | 649   | 638   | 545   | 443   | 718   | 685   | 530   | 587   | 418   | 448   | 647   | 751   | 666   | 635   | 791   | 565   | 592   | Naa80   |      |
| Naa     | 352   | 357   | 350   | 359   | 518   | 450   | 279   | 379   | 517   | 452   | 453   | 339   | 479   | 292   | 413   | 453   | 370   | 336   | 363   | 349   | 264   | 498   | 627   | 347   | 396   | 271   | 317   | 318   | Naa     |      |
| Naalad2 | 272   | 174   | 192   | 167   | 183   | 194   | 194   | 401   | 434   | 250   | 527   | 303   | 375   | 260   | 264   | 328   | 173   | 162   | 160   | 212   | 168   | 538   | 465   | 365   | 346   | 419   | 259   | 329   | Naalad2 |      |
| Naalad1 | 458   | 538   | 623   | 485   | 300   | 393   | 497   | 166   | 262   | 290   | 227   | 445   | 374   | 424   | 368   | 468   | 504   | 416   | 446   | 370   | 383   | 187   | 226   | 364   | 291   | 478   | 478   | 317   | Naalad1 |      |
| Naalad2 | 189   | 86    | 66    | 71    | 78    | 107   | 46    | 139   | 145   | 131   | 279   | 88    | 136   | 138   | 129   | 136   | 94    | 123   | 56    | 76    | 56    | 157   | 218   | 110   | 96    | 55    | 126   | 112   | Naalad2 |      |
| Nab1    | 1678  | 1523  | 1645  | 1995  | 2442  | 2236  | 2514  | 2096  | 2256  | 2079  | 2055  | 1887  | 1973  | 1986  | 1924  | 1729  | 1798  | 2128  | 2377  | 2211  | 2389  | 2181  | 2181  | 2375  | 2114  | 2116  | 2231  | 1711  | 1741    | Nab1 |
| Nab2    | 1113  | 1227  | 1492  | 1191  | 1027  | 1032  | 774   | 1039  | 1422  | 1302  | 1677  | 896   | 1224  | 840   | 981   | 1319  | 1308  | 1052  | 1172  | 848   | 819   | 951   | 1557  | 1214  | 820   | 1506  | 1004  | 922   | Nab2    |      |
| Nabp1   | 1626  | 1312  | 1475  | 1644  | 1438  | 1499  | 1643  | 767   | 562   | 550   | 612   | 641   | 579   | 655   | 1710  | 1456  | 1548  | 1732  | 1411  | 1555  | 1584  | 677   | 693   | 623   | 507   | 633   | 568   | 503   | Nabp1   |      |
| Nabp2   | 2343  | 3089  | 3269  | 3272  | 2981  | 2852  | 2908  | 2606  | 2850  | 3423  | 2949  | 3918  | 3274  | 3688  | 2276  | 2209  | 3306  | 2885  | 3607  | 3074  | 3104  | 2837  | 2743  | 3832  | 3654  | 4362  | 3597  | 3814  | Nabp2   |      |
| Naca    | 30417 | 29940 | 31160 | 28448 | 23448 | 24475 | 30716 | 30963 | 28796 | 27428 | 30693 | 30344 | 30181 | 37955 | 30623 | 27001 | 30178 | 25874 | 26745 | 31754 | 29309 | 24495 | 29152 | 33186 | 29140 | 37122 | 32895 | 38887 | Naca    |      |
| Nacad   | 1390  | 2046  | 2410  | 2891  | 4410  | 3337  | 2881  | 4704  | 5278  | 7343  | 6059  | 7117  | 5846  | 5751  | 1659  | 1624  | 3029  | 2963  | 4348  | 2689  | 3270  | 8863  | 4754  | 7065  | 8314  | 5453  | 5439  | 5478  | Nacad   |      |
| Nacc1   | 6312  | 7411  | 9088  | 7911  | 7729  | 7571  | 6708  | 6571  | 8232  | 8593  | 8083  | 10780 | 8913  | 9290  | 5908  | 6547  | 8876  | 7291  | 8870  | 6225  | 7312  | 7568  | 7976  | 10126 | 9041  | 12142 | 9389  | 9817  | Nacc1   |      |
| Nacc2   | 1004  | 1136  | 1290  | 1363  | 1715  | 1458  | 1305  | 1221  | 1428  | 1729  | 1769  | 1620  | 1533  | 1458  | 1122  | 1178  | 1442  | 1545  | 1417  | 1138  | 1179  | 1883  | 1492  | 1733  | 1823  | 1457  | 1427  | 1400  | Nacc2   |      |
| Nadk    | 7194  | 7819  | 6659  | 6992  | 6559  | 6596  | 7021  | 5998  | 6115  | 5455  | 5521  | 5994  | 5722  | 5575  | 7137  | 7061  | 6665  | 7346  | 7135  | 6767  | 7167  | 5817  | 6091  | 6152  | 5797  | 6168  | 6019  | 6158  | Nadk    |      |
| Nadk2   | 5     | 2     | 9     | 1     | 3     | 0     | 2     | 1     | 3     | 0     | 1     | 1     | 0     | 2     | 0     | 2     | 2     | 1     | 3     | 1     | 1     | 2     | 1     | 1     | 3     | 2     | 0     | 1     | Nadk2   |      |
| Nadsyn1 | 630   | 929   | 826   | 719   | 823   | 784   | 695   | 681   | 695   | 612   | 682   | 705   | 778   | 620   | 728   | 829   | 796   | 754   | 794   | 722   | 644   | 597   | 698   | 670   | 710   | 735   | 862   | 662   | Nadsyn1 |      |
| Nae1    | 5683  | 4417  | 5121  | 4607  | 4911  | 5236  | 5511  | 6891  | 5871  | 5192  | 5646  | 6091  | 6055  | 6157  | 5851  | 5204  | 4821  | 4590  | 4867  | 5942  | 5084  | 5553  | 5729  | 5670  | 5876  | 6318  | 6207  | 6395  | Nae1    |      |
| Naf1    | 1888  | 1521  | 2410  | 2108  | 1910  | 1917  | 2038  | 1437  | 1437  | 1459  | 1541  | 1806  | 1641  | 1806  | 1859  | 1826  | 2022  | 1951  | 1887  | 1673  | 1999  | 1430  | 1459  | 1531  | 1356  | 1949  | 1452  | 1885  | Naf1    |      |
| Naga    | 2261  | 2757  | 2783  | 3034  | 2459  | 2299  | 2101  | 1134  | 1500  | 1383  | 1575  | 1357  | 1414  | 1197  | 2244  | 2822  | 2756  | 3023  | 2402  | 2063  | 2080  | 1370  | 1570  | 1450  | 1217  | 1419  | 1285  | 1353  | Naga    |      |
| Nagk    | 1138  | 1369  | 1363  | 1396  | 1625  | 1453  | 1359  | 1734  | 1999  | 2182  | 2130  | 1945  | 1979  | 1985  | 1145  | 1178  | 1418  | 1472  | 1644  | 1477  | 1391  | 2301  | 2148  | 2173  | 2332  | 2014  | 1813  | 1887  | Nagk    |      |
| Naglu   | 715   | 988   | 893   | 911   | 776   | 777   | 618   | 443   | 558   | 587   | 579   | 645   | 686   | 487   | 734   | 967   | 988   | 801   | 828   | 660   | 688   | 622   | 656   | 482   | 563   | 600   | 595   | 487   | Naglu   |      |
| Nagpa   | 369   | 498   | 423   | 296   | 374   | 314   | 298   | 355   | 436   | 446   | 397   | 441   | 447   | 371   | 378   | 418   | 422   | 420   | 429   | 308   | 305   | 379   | 454   | 387   | 362   | 454   | 402   | 422   | Nagpa   |      |
| Nags    | 10    | 22    | 17    | 9     | 3     | 2     | 4     | 4     |       |       |       |       |       |       |       |       |       |       |       |       |       |       |       |       |       |       |       |       |         |      |

|         |       |       |       |       |       |       |       |       |       |       |       |       |       |       |       |       |       |       |       |       |       |       |       |       |       |       |        |        |        |
|---------|-------|-------|-------|-------|-------|-------|-------|-------|-------|-------|-------|-------|-------|-------|-------|-------|-------|-------|-------|-------|-------|-------|-------|-------|-------|-------|--------|--------|--------|
| Nat2    | 288   | 231   | 355   | 178   | 230   | 200   | 203   | 232   | 242   | 191   | 184   | 210   | 320   | 194   | 282   | 293   | 261   | 172   | 252   | 245   | 172   | 150   | 238   | 146   | 110   | 207   | 202    | 211    | Nat2   |
| Nat3    | 0     | 1     | 0     | 0     | 1     | 0     | 0     | 0     | 0     | 0     | 1     | 0     | 0     | 0     | 3     | 0     | 3     | 0     | 0     | 0     | 1     | 3     | 1     | 0     | 0     | 0     | 0      | 0      | Nat3   |
| Nat8    | 0     | 1     | 2     | 0     | 0     | 0     | 0     | 0     | 1     | 2     | 0     | 0     | 0     | 0     | 0     | 1     | 0     | 0     | 0     | 0     | 0     | 0     | 0     | 0     | 0     | 2     | 1      | 0      | Nat8   |
| Nat8f1  | 194   | 198   | 191   | 165   | 245   | 168   | 248   | 216   | 246   | 184   | 218   | 244   | 178   | 228   | 183   | 146   | 207   | 167   | 196   | 249   | 220   | 237   | 249   | 199   | 218   | 195   | 264    | 209    | Nat8f1 |
| Nat8f2  | 6     | 5     | 0     | 13    | 3     | 4     | 9     | 1     | 5     | 3     | 7     | 9     | 6     | 1     | 3     | 4     | 6     | 9     | 1     | 8     | 6     | 2     | 3     | 3     | 5     | 4     | 0      | 1      | Nat8f2 |
| Nat8f3  | 0     | 0     | 0     | 0     | 1     | 0     | 0     | 0     | 0     | 1     | 0     | 0     | 0     | 0     | 0     | 0     | 0     | 0     | 0     | 0     | 0     | 0     | 0     | 0     | 0     | 0     | 0      | 0      | Nat8f3 |
| Nat8f4  | 497   | 448   | 479   | 445   | 465   | 501   | 497   | 793   | 662   | 666   | 517   | 768   | 636   | 732   | 538   | 359   | 506   | 506   | 520   | 531   | 477   | 663   | 619   | 680   | 692   | 821   | 784    | 821    | Nat8f4 |
| Nat8f5  | 0     | 0     | 0     | 0     | 0     | 0     | 0     | 1     | 0     | 0     | 1     | 0     | 0     | 0     | 0     | 0     | 0     | 0     | 0     | 0     | 0     | 0     | 0     | 0     | 1     | 0     | 0      | 0      | Nat8f5 |
| Nat8f6  | 0     | 0     | 0     | 0     | 0     | 0     | 0     | 0     | 0     | 0     | 0     | 0     | 0     | 0     | 0     | 0     | 0     | 0     | 0     | 0     | 0     | 0     | 1     | 0     | 0     | 0     | 0      | 0      | Nat8f6 |
| Nat8i   | 1972  | 2683  | 3521  | 3897  | 4196  | 3368  | 3320  | 2099  | 2464  | 3001  | 2552  | 2996  | 2383  | 2624  | 2037  | 2155  | 3782  | 4077  | 4199  | 3134  | 3425  | 3068  | 2218  | 3281  | 3730  | 2729  | 2482   | 2687   | Nat8i  |
| Nat9    | 516   | 662   | 696   | 679   | 547   | 560   | 493   | 613   | 676   | 694   | 748   | 716   | 711   | 641   | 568   | 575   | 643   | 495   | 613   | 571   | 580   | 545   | 715   | 752   | 808   | 757   | 793    | 792    | Nat9   |
| Natd1   | 5328  | 6719  | 4817  | 5897  | 5435  | 5325  | 5465  | 4319  | 4468  | 4656  | 4239  | 4647  | 4356  | 4344  | 5363  | 5791  | 5311  | 5673  | 5636  | 4982  | 5363  | 5060  | 4406  | 4631  | 4888  | 4649  | 4018   | 4222   | Natd1  |
| Nav1    | 13836 | 13744 | 10833 | 19437 | 26871 | 23870 | 24582 | 17437 | 19556 | 25672 | 22125 | 21301 | 17859 | 21144 | 13828 | 14360 | 15051 | 21737 | 23185 | 18606 | 25659 | 25927 | 16476 | 20199 | 27246 | 13849 | 17282  | 17329  | Nav1   |
| Nav2    | 3101  | 4202  | 5906  | 5868  | 6944  | 4832  | 4188  | 3604  | 3779  | 5190  | 5287  | 4765  | 5866  | 4328  | 3783  | 5061  | 6006  | 5913  | 4551  | 3506  | 4868  | 5655  | 4167  | 4622  | 4733  | 2427  | 4652   | 4844   | Nav2   |
| Nav3    | 2410  | 2632  | 1778  | 4148  | 6069  | 5185  | 5280  | 4454  | 4735  | 5047  | 5073  | 3669  | 3850  | 3667  | 3369  | 3038  | 2792  | 4351  | 4796  | 4480  | 5861  | 5740  | 4675  | 3501  | 5567  | 1747  | 3524   | 3004   | Nav3   |
| Naxd    | 2132  | 2607  | 2327  | 2681  | 2507  | 2648  | 2429  | 2814  | 3321  | 3238  | 3189  | 3492  | 3219  | 3419  | 2119  | 2323  | 2471  | 2360  | 2884  | 2536  | 2585  | 2946  | 3100  | 3429  | 3389  | 3352  | 3605   | 3445   | Naxd   |
| Naxe    | 2457  | 2610  | 2375  | 2385  | 2019  | 2185  | 2309  | 2467  | 2499  | 2490  | 2295  | 2248  | 2480  | 2432  | 2466  | 2311  | 2328  | 2273  | 2293  | 2194  | 2383  | 2354  | 2753  | 2643  | 2463  | 2917  | 2367   | 2669   | Naxe   |
| Nbas    | 4022  | 4361  | 2365  | 2843  | 3209  | 3464  | 3095  | 4509  | 4642  | 3879  | 4095  | 4018  | 4177  | 3736  | 4131  | 3777  | 2887  | 3066  | 3144  | 3541  | 3465  | 3987  | 4321  | 3179  | 4047  | 2460  | 4398   | 3819   | Nbas   |
| Nbdy    | 1428  | 1456  | 1330  | 1458  | 1447  | 1479  | 1645  | 1896  | 1769  | 1689  | 1704  | 1554  | 1588  | 1708  | 1481  | 1406  | 1415  | 1416  | 1494  | 1550  | 1590  | 1648  | 1728  | 1619  | 1853  | 1855  | 1614   | 1651   | Nbdy   |
| Nbea    | 14650 | 13563 | 9142  | 1754  | 23581 | 24917 | 25836 | 20743 | 19655 | 21430 | 18964 | 17439 | 15973 | 18435 | 15387 | 12931 | 12389 | 18324 | 20326 | 22253 | 28607 | 19767 | 15606 | 24307 | 9120  | 17809 | 15270  | Nbea   |        |
| Nbeal1  | 9360  | 7173  | 4462  | 6715  | 6939  | 8893  | 9371  | 7267  | 6292  | 3784  | 4718  | 3932  | 4533  | 4395  | 9904  | 8287  | 5302  | 6684  | 6092  | 10540 | 9421  | 4538  | 5965  | 3595  | 4448  | 2715  | 4578   | 3889   | Nbeal1 |
| Nbeal2  | 1299  | 1825  | 2016  | 2114  | 2094  | 1720  | 1595  | 677   | 826   | 910   | 725   | 959   | 713   | 783   | 1208  | 1674  | 1953  | 1874  | 2025  | 1700  | 1742  | 911   | 721   | 908   | 950   | 593   | 863    | 818    | Nbeal2 |
| Nbl1    | 1483  | 1504  | 1325  | 1040  | 1128  | 1330  | 606   | 2208  | 2897  | 2322  | 2973  | 1563  | 1961  | 1288  | 1415  | 1928  | 1039  | 1476  | 705   | 799   | 669   | 1623  | 3256  | 2307  | 1544  | 2249  | 1535   | 1333   | Nbl1   |
| Nbn     | 782   | 588   | 809   | 537   | 598   | 606   | 641   | 2792  | 2536  | 2086  | 2076  | 2623  | 2369  | 2578  | 773   | 618   | 664   | 508   | 645   | 747   | 619   | 2082  | 2387  | 2268  | 2106  | 3026  | 2671   | 2856   | Nbn    |
| Nbr1    | 17292 | 17443 | 13867 | 17123 | 16179 | 16097 | 18256 | 21174 | 18080 | 17693 | 16740 | 17781 | 16595 | 19171 | 18626 | 15575 | 15527 | 17090 | 16289 | 17629 | 17972 | 18307 | 17764 | 18064 | 19257 | 16012 | 17959  | 17920  | Nbr1   |
| Ncald   | 3344  | 3608  | 4039  | 4067  | 5006  | 4541  | 4555  | 2469  | 2506  | 2661  | 2528  | 1748  | 1711  | 1951  | 4073  | 3259  | 3722  | 4344  | 4255  | 4911  | 4782  | 3235  | 3139  | 2017  | 2787  | 1658  | 1983   | 2013   | Ncald  |
| Ncam1   | 15859 | 18139 | 22167 | 31045 | 35902 | 27718 | 28972 | 22904 | 23693 | 25963 | 27973 | 24852 | 25810 | 25763 | 19010 | 17973 | 28239 | 31559 | 31959 | 24984 | 31704 | 39766 | 22376 | 30591 | 36410 | 18190 | 21062  | 23883  | Ncam1  |
| Ncam2   | 1114  | 898   | 687   | 1320  | 2050  | 2032  | 1963  | 1907  | 1814  | 1661  | 1609  | 1259  | 1233  | 1396  | 1367  | 846   | 1050  | 1395  | 1792  | 2026  | 2171  | 2029  | 1865  | 1258  | 1709  | 671   | 1288   | 1121   | Ncam2  |
| Ncan    | 7999  | 10948 | 14112 | 18159 | 22264 | 18366 | 18832 | 17170 | 18389 | 25757 | 19065 | 19578 | 22342 | 15033 | 8061  | 18099 | 18403 | 23300 | 15295 | 19966 | 28990 | 15822 | 26081 | 30633 | 18042 | 21043 | 22335  | Ncan   |        |
| Ncapd2  | 22228 | 23470 | 25399 | 21475 | 17463 | 18784 | 20091 | 17407 | 19630 | 20453 | 18093 | 29212 | 23689 | 28359 | 19417 | 20023 | 24094 | 19585 | 22039 | 18183 | 19882 | 16225 | 16176 | 24914 | 21989 | 32228 | 28229  | 28591  | Ncapd2 |
| Ncapd3  | 8731  | 8738  | 5435  | 5854  | 5148  | 6671  | 5482  | 4790  | 4082  | 3855  | 5147  | 5144  | 7965  | 6747  | 5575  | 6078  | 5577  | 6966  | 6757  | 6369  | 4361  | 3924  | 4384  | 4166  | 5179  | 4836  | Ncapd3 |        |        |
| Ncapg   | 9063  | 6440  | 6518  | 5362  | 3908  | 5288  | 6176  | 7248  | 6073  | 4675  | 4532  | 7898  | 6844  | 8116  | 7987  | 7182  | 5371  | 4786  | 5032  | 7088  | 5408  | 3721  | 5367  | 5873  | 5361  | 8184  | 8400   | 8261   | Ncapg  |
| Ncapg2  | 8135  | 6391  | 5893  | 5670  | 4320  | 5722  | 6505  | 6281  | 5553  | 4953  | 4754  | 6924  | 6004  | 7206  | 7203  | 6872  | 5676  | 4927  | 5277  | 6677  | 5626  | 3801  | 5005  | 5743  | 4706  | 6025  | 7076   | 6912   | Ncapg2 |
| Ncaph   | 7789  | 7850  | 6994  | 6411  | 4852  | 5645  | 6594  | 4670  | 4787  | 4618  | 3986  | 6920  | 5579  | 6645  | 6825  | 6587  | 6966  | 5615  | 5938  | 6136  | 6094  | 3228  | 4295  | 5538  | 4531  | 7974  | 6754   | 7036   | Ncaph  |
| Ncaph2  | 10738 | 13676 | 11507 | 10738 | 8740  | 9619  | 9681  | 8922  | 9985  | 8723  | 8431  | 10434 | 9727  | 10470 | 10266 | 10830 | 10931 | 9588  | 10919 | 10458 | 10165 | 7429  | 9519  | 10043 | 9206  | 11870 | 11059  | 10903  | Ncaph2 |
| Ncbp1   | 15597 | 14922 | 13384 | 13266 | 11736 | 12623 | 13876 | 12224 | 10401 | 9420  | 8644  | 11169 | 9762  | 11390 | 15927 | 13567 | 13174 | 11913 | 12996 | 14238 | 13609 | 9180  | 9825  | 10205 | 10148 | 11449 | 11355  | 11510  | Ncbp1  |
| Ncbp2   | 10259 | 9481  | 11744 | 9396  | 7706  | 8346  | 8825  | 9404  | 8291  | 8167  | 8419  | 9676  | 9302  | 9594  | 10203 | 10276 | 9864  | 8621  | 8433  | 9780  | 8270  | 7738  | 8515  | 9166  | 8537  | 11128 | 10135  | 10251  | Ncbp2  |
| Ncbp3   | 4967  | 4444  | 4426  | 4843  | 4714  | 4667  | 4870  | 5968  | 5083  | 5180  | 5151  | 5515  | 5281  | 5807  | 4957  | 4338  | 4507  | 4590  | 4623  | 4854  | 5059  | 5372  | 5182  | 5181  | 5088  | 5521  | 5649   | 5734   | Ncbp3  |
| Nccrp1  | 35    | 22    | 9     | 13    | 15    | 13    | 16    | 4     | 6     | 12    | 1     | 1     | 1     | 5     | 26    | 14    | 10    | 9     | 2     | 9     | 2     | 2     | 8     | 7     | 6     | 7     | 2      | Nccrp1 |        |
| Ncdn    | 3891  | 5073  | 5065  | 6173  | 6715  | 5624  | 5630  | 3225  | 4217  | 4768  | 4404  | 4309  | 3708  | 3862  | 3833  | 4314  | 5842  | 6641  | 6748  | 4859  | 6050  | 4918  | 3972  | 4584  | 4966  | 4464  | 3435   | 3612   | Ncdn   |
| Nceh1   | 1634  | 1552  | 1418  | 1602  | 1620  | 1531  | 1749  | 586   | 507   | 431   | 489   | 521   | 511   | 443   | 1631  | 1429  | 1389  | 1640  | 1470  | 1696  | 1773  | 623   | 534   | 445   | 428   | 479   | 495    | 434    | Nceh1  |
| Ncf1    | 110   | 117   | 149   | 159   | 97    | 92    | 94    | 205   | 257   | 262   | 311   | 226   | 247   | 193   | 91    | 132   | 97    | 119   | 155   | 97    | 101   | 214   | 355   | 232   | 251   | 265   | 244    | 201    | Ncf1   |
| Ncf2    | 185   | 209   | 244   | 151   | 124   | 184   | 110   | 234   | 255   | 216   | 269   | 236   | 217   | 182   | 189   | 220   | 143   | 164   | 102   | 175   | 144   | 142   | 325   | 258   | 160   | 236   | 201    | 227    | Ncf2   |
| Ncf4    | 46    | 49    | 69    | 28    | 29    | 22    | 15    | 22    | 56    | 24    | 42    | 38    | 95    | 68    | 30    | 42    | 30    | 21    | 22    | 42    | 16    | 33    | 45    | 35    | 20    | 31    | 58     | 93     | Ncf4   |
| Nck1    | 3182  | 2848  | 3476  | 3198  | 2686  | 2763  | 3132  | 2992  | 2434  | 2191  | 2394  | 2301  | 2647  | 2870  | 3443  | 3132  | 3101  | 2958  | 2938  | 3390  | 2920  | 2587  | 2750  | 2454  | 2230  | 2686  | 2607   | 2797   | Nck1   |
| Nck2    | 2147  | 2108  | 2573  | 2393  | 2585  | 2414  | 2305  | 2567  | 2838  | 2942  | 3134  | 2802  | 2954  | 2751  | 1990  | 2337  | 2239  | 2216  | 2439  | 1971  | 2108  | 2812  | 2899  | 3096  | 3068  | 3423  | 2592   | 2656   | Nck2   |
| Nckap1  | 17467 | 14774 | 15711 | 15558 | 17651 | 17954 | 18796 | 22278 | 20337 | 20390 | 18918 | 21767 | 20634 | 21288 | 17991 | 15896 | 15939 | 15944 | 17252 | 17346 | 17991 | 22368 | 20740 | 19505 | 21073 | 20184 | 21474  | 21021  | Nckap1 |
| Nckap11 | 438   | 405   | 437   | 291   | 329   | 344   | 265   | 459   | 562   | 405   | 541   | 463   | 416   | 398   | 538   | 591   | 254   | 343   | 420   | 292   | 486   | 683   | 346   | 374   | 423   | 373   | 373    |        |        |



|          |      |       |      |      |       |      |       |       |       |       |       |       |       |       |       |      |      |      |       |       |       |       |       |       |       |       |       |          |          |
|----------|------|-------|------|------|-------|------|-------|-------|-------|-------|-------|-------|-------|-------|-------|------|------|------|-------|-------|-------|-------|-------|-------|-------|-------|-------|----------|----------|
| Ndst1    | 8209 | 8573  | 8347 | 8832 | 10722 | 9827 | 8418  | 9583  | 11831 | 12276 | 12458 | 12381 | 11878 | 11259 | 7448  | 8586 | 9020 | 9652 | 10310 | 7757  | 8798  | 10835 | 10773 | 11604 | 12011 | 9381  | 11338 | 11089    | Ndst1    |
| Ndst2    | 1742 | 1995  | 1920 | 1810 | 1463  | 1707 | 1618  | 1945  | 2363  | 2333  | 2440  | 2414  | 2557  | 2230  | 1710  | 1911 | 1736 | 1738 | 1655  | 1449  | 1435  | 2212  | 2328  | 2420  | 2134  | 2450  | 2280  | 2279     | Ndst2    |
| Ndst3    | 1589 | 1566  | 1524 | 1653 | 2095  | 2090 | 1949  | 3646  | 2778  | 2726  | 2167  | 3036  | 2976  | 3142  | 2041  | 1266 | 1545 | 1689 | 2061  | 2179  | 2413  | 2907  | 2566  | 2648  | 3376  | 1193  | 3495  | 3194     | Ndst3    |
| Ndst4    | 427  | 407   | 245  | 542  | 854   | 682  | 792   | 741   | 755   | 571   | 561   | 354   | 379   | 385   | 690   | 516  | 455  | 602  | 633   | 869   | 777   | 794   | 641   | 425   | 700   | 236   | 328   | 344      | Ndst4    |
| Ndufa1   | 1630 | 1983  | 2083 | 2045 | 1846  | 1210 | 2319  | 1691  | 1459  | 2023  | 1675  | 1738  | 1800  | 2630  | 1708  | 1191 | 2022 | 1630 | 1623  | 1907  | 2218  | 1459  | 1579  | 2244  | 1980  | 1711  | 1716  | 2656     | Ndufa1   |
| Ndufa10  | 5555 | 5925  | 5201 | 4804 | 4578  | 4825 | 4657  | 5522  | 5544  | 5058  | 4929  | 5227  | 5134  | 5681  | 5410  | 5153 | 5188 | 4492 | 4722  | 4913  | 4830  | 4771  | 5358  | 5359  | 5060  | 6085  | 5425  | 5769     | Ndufa10  |
| Ndufa11  | 2118 | 2943  | 2255 | 2497 | 2407  | 2514 | 2470  | 1969  | 2656  | 2269  | 2465  | 2221  | 2501  | 2353  | 2124  | 2245 | 2466 | 2376 | 2801  | 2937  | 2355  | 1942  | 2578  | 2234  | 2430  | 2547  | 2558  | 2409     | Ndufa11  |
| Ndufa12  | 1429 | 2822  | 1858 | 2997 | 1937  | 1872 | 2497  | 1397  | 2063  | 2111  | 2172  | 2238  | 2392  | 1940  | 2639  | 2064 | 2296 | 2687 | 2243  | 3190  | 3038  | 2117  | 2409  | 1864  | 2684  | 3330  | 1697  | 3567     | Ndufa12  |
| Ndufa13  | 2001 | 2520  | 2805 | 2615 | 2497  | 2250 | 2506  | 2452  | 2656  | 2805  | 3046  | 2930  | 3047  | 3411  | 1908  | 2036 | 2486 | 2461 | 2734  | 2828  | 2472  | 2097  | 2480  | 3325  | 2857  | 3203  | 3230  | 3236     | Ndufa13  |
| Ndufa2   | 1718 | 2107  | 2272 | 2192 | 1762  | 2171 | 2187  | 2127  | 2155  | 2773  | 2536  | 2638  | 2429  | 3160  | 1698  | 1583 | 2275 | 1721 | 1813  | 2317  | 2066  | 1614  | 2241  | 2917  | 2564  | 2985  | 2659  | 3330     | Ndufa2   |
| Ndufa3   | 3044 | 3581  | 3560 | 3869 | 3090  | 2541 | 4761  | 3013  | 2715  | 3527  | 3693  | 2999  | 3221  | 5593  | 3119  | 1963 | 4063 | 3187 | 3021  | 3652  | 4849  | 2336  | 2673  | 4253  | 3682  | 3559  | 3398  | 5153     | Ndufa3   |
| Ndufa4   | 8679 | 8853  | 9611 | 9171 | 8344  | 7503 | 10747 | 8600  | 7708  | 8030  | 8710  | 7604  | 8251  | 9963  | 9800  | 7245 | 9831 | 8055 | 8505  | 10346 | 10354 | 6946  | 7935  | 9041  | 8335  | 9067  | 8087  | 10504    | Ndufa4   |
| Ndufa4i2 | 76   | 98    | 76   | 108  | 148   | 109  | 139   | 100   | 143   | 133   | 179   | 89    | 138   | 131   | 74    | 98   | 130  | 99   | 115   | 117   | 192   | 151   | 141   | 150   | 155   | 134   | 138   | Ndufa4i2 |          |
| Ndufa5   | 1831 | 1992  | 1904 | 2239 | 1920  | 1593 | 2847  | 1903  | 1570  | 1786  | 1869  | 1760  | 1777  | 2355  | 1925  | 1379 | 2027 | 1870 | 1778  | 2055  | 2381  | 1614  | 1607  | 2140  | 1890  | 1952  | 1840  | 2565     | Ndufa5   |
| Ndufa6   | 2029 | 2230  | 2209 | 2134 | 2036  | 1743 | 2417  | 2160  | 1981  | 2338  | 2309  | 2208  | 2201  | 3015  | 2006  | 1804 | 2449 | 2045 | 2016  | 2213  | 2729  | 2099  | 2089  | 2653  | 2295  | 2203  | 2163  | 2889     | Ndufa6   |
| Ndufa7   | 2865 | 3472  | 3272 | 3095 | 2923  | 2908 | 2959  | 3598  | 3617  | 4035  | 3760  | 3716  | 3891  | 4244  | 2894  | 2646 | 3395 | 2737 | 3081  | 3317  | 3179  | 2979  | 3695  | 4116  | 3923  | 4058  | 4058  | 4392     | Ndufa7   |
| Ndufa8   | 2790 | 3527  | 3366 | 3607 | 3174  | 2998 | 3303  | 2286  | 2709  | 2855  | 2692  | 2689  | 2595  | 2879  | 2765  | 2959 | 3525 | 3292 | 3420  | 3358  | 3497  | 2187  | 2773  | 2895  | 2859  | 3171  | 2897  | 2994     | Ndufa8   |
| Ndufa9   | 5522 | 5207  | 5370 | 4538 | 4336  | 4627 | 4237  | 6886  | 6058  | 5610  | 5719  | 6292  | 6083  | 5641  | 5020  | 5099 | 4414 | 4643 | 5407  | 4060  | 5755  | 6047  | 6127  | 6148  | 5786  | 7148  | 6892  | 6330     | Ndufa9   |
| Ndufab1  | 3778 | 3733  | 4170 | 3953 | 3422  | 3521 | 4324  | 3976  | 3657  | 3736  | 4050  | 4231  | 4068  | 4792  | 3716  | 3366 | 3982 | 3554 | 3723  | 3567  | 3939  | 3566  | 3479  | 4530  | 4101  | 4776  | 4558  | 5079     | Ndufab1  |
| Ndufab1  | 917  | 676   | 1048 | 702  | 808   | 767  | 888   | 1561  | 1337  | 1268  | 1485  | 1420  | 1439  | 1564  | 919   | 725  | 762  | 743  | 729   | 777   | 732   | 1352  | 1447  | 1354  | 1276  | 1478  | 1436  | 1646     | Ndufab1  |
| Ndufaf2  | 1861 | 1878  | 2198 | 2114 | 1753  | 1759 | 2472  | 1272  | 1116  | 1372  | 1244  | 1350  | 1302  | 1856  | 1841  | 1688 | 2224 | 2157 | 1979  | 2349  | 2419  | 1131  | 1163  | 1626  | 1489  | 1594  | 1488  | 1686     | Ndufaf2  |
| Ndufaf3  | 752  | 904   | 751  | 763  | 841   | 792  | 892   | 976   | 924   | 902   | 846   | 883   | 789   | 923   | 807   | 678  | 800  | 706  | 925   | 1020  | 793   | 874   | 962   | 907   | 891   | 1045  | 924   | 853      | Ndufaf3  |
| Ndufaf4  | 3811 | 3471  | 3613 | 3655 | 3406  | 3345 | 4265  | 3132  | 2625  | 2742  | 2494  | 2682  | 2659  | 2853  | 4412  | 3809 | 3582 | 3793 | 3453  | 4360  | 3851  | 3003  | 2697  | 2627  | 2614  | 3103  | 2772  | 2885     | Ndufaf4  |
| Ndufaf5  | 1232 | 1221  | 1051 | 1204 | 1313  | 1129 | 1414  | 1246  | 1087  | 1055  | 1014  | 976   | 934   | 1182  | 1432  | 1131 | 1145 | 1207 | 1196  | 1513  | 1386  | 1006  | 1219  | 1100  | 1040  | 1155  | 1033  | 1101     | Ndufaf5  |
| Ndufaf6  | 601  | 514   | 573  | 525  | 488   | 461  | 463   | 383   | 372   | 337   | 376   | 413   | 413   | 376   | 539   | 515  | 457  | 450  | 514   | 432   | 521   | 361   | 402   | 415   | 371   | 452   | 417   | 533      | Ndufaf6  |
| Ndufaf7  | 1257 | 1266  | 1382 | 1444 | 1515  | 1339 | 1385  | 2249  | 1972  | 2273  | 2201  | 2034  | 2070  | 2267  | 1313  | 1320 | 1452 | 1502 | 1365  | 1479  | 1539  | 2019  | 2144  | 2251  | 2231  | 2255  | 1965  | 2248     | Ndufaf7  |
| Ndufaf8  | 193  | 274   | 289  | 188  | 190   | 180  | 191   | 348   | 404   | 414   | 450   | 475   | 464   | 437   | 216   | 147  | 299  | 190  | 203   | 257   | 231   | 236   | 377   | 459   | 422   | 617   | 481   | 501      | Ndufaf8  |
| Ndufb1   | 1637 | 1506  | 1467 | 1871 | 1531  | 1107 | 3175  | 1871  | 1389  | 2182  | 1813  | 1636  | 1605  | 4172  | 1511  | 791  | 1732 | 1278 | 1269  | 1733  | 3219  | 1352  | 1194  | 2680  | 1944  | 1666  | 1691  | 3287     | Ndufb1   |
| Ndufb10  | 4032 | 4502  | 4754 | 5098 | 4322  | 4256 | 4457  | 3335  | 3330  | 4060  | 3820  | 3596  | 3699  | 3878  | 3818  | 3379 | 4684 | 4415 | 4734  | 4482  | 4535  | 3183  | 3307  | 4223  | 3968  | 4248  | 4037  | 3974     | Ndufb10  |
| Ndufb11  | 3452 | 4421  | 3598 | 3742 | 3526  | 3486 | 3865  | 4184  | 4110  | 3909  | 3912  | 3982  | 4102  | 4508  | 3696  | 3445 | 3814 | 3465 | 3801  | 4437  | 4029  | 3405  | 4264  | 4394  | 4083  | 4583  | 4470  | 4459     | Ndufb11  |
| Ndufb11b | 0    | 0     | 0    | 0    | 0     | 0    | 1     | 0     | 0     | 0     | 0     | 0     | 0     | 0     | 0     | 0    | 0    | 0    | 0     | 0     | 0     | 0     | 1     | 0     | 0     | 0     | 0     | 0        | Ndufb11b |
| Ndufb2   | 880  | 860   | 862  | 986  | 1116  | 930  | 1101  | 1270  | 1071  | 1093  | 1213  | 978   | 962   | 1059  | 897   | 829  | 1083 | 922  | 1016  | 1056  | 1030  | 1402  | 1118  | 1159  | 1282  | 969   | 1068  | 1012     | Ndufb2   |
| Ndufb3   | 2105 | 1992  | 2875 | 2710 | 2125  | 1960 | 2647  | 2770  | 2481  | 3073  | 2889  | 3041  | 2834  | 2777  | 2293  | 1727 | 2924 | 2327 | 2250  | 2765  | 2647  | 2192  | 2498  | 3450  | 2982  | 3426  | 2980  | 3635     | Ndufb3   |
| Ndufb4   | 1806 | 2268  | 2122 | 2439 | 2286  | 2369 | 2659  | 2047  | 2251  | 2184  | 2542  | 2152  | 2503  | 2866  | 1974  | 1843 | 2201 | 2183 | 2500  | 2737  | 2692  | 1713  | 2319  | 2616  | 2445  | 2584  | 2617  | 2908     | Ndufb4   |
| Ndufb5   | 4196 | 4483  | 3747 | 3842 | 3780  | 3698 | 4483  | 4935  | 4439  | 4221  | 4278  | 4207  | 4146  | 4857  | 4315  | 3941 | 3721 | 3660 | 3871  | 4910  | 4337  | 3880  | 4390  | 4177  | 4179  | 4456  | 4495  | 4803     | Ndufb5   |
| Ndufb6   | 2990 | 2988  | 3176 | 3254 | 2818  | 2570 | 3562  | 2232  | 2054  | 2355  | 2291  | 2191  | 2401  | 2862  | 2987  | 2446 | 3326 | 3017 | 3057  | 3462  | 3481  | 1673  | 2025  | 2675  | 2156  | 2884  | 2471  | 2964     | Ndufb6   |
| Ndufb7   | 2859 | 3844  | 3670 | 3298 | 2932  | 2997 | 3035  | 3243  | 3356  | 3407  | 3232  | 3652  | 3606  | 3931  | 3022  | 2563 | 3763 | 3144 | 3476  | 3468  | 3181  | 2872  | 3311  | 4033  | 3722  | 4362  | 3948  | 4292     | Ndufb7   |
| Ndufb8   | 1081 | 1184  | 1513 | 1217 | 1052  | 796  | 1151  | 1136  | 1004  | 1495  | 1269  | 1266  | 1127  | 1663  | 1117  | 886  | 1447 | 998  | 954   | 980   | 1289  | 986   | 1115  | 1576  | 1291  | 1409  | 1199  | 1667     | Ndufb8   |
| Ndufb9   | 745  | 829   | 563  | 745  | 642   | 483  | 1077  | 900   | 697   | 915   | 803   | 819   | 689   | 1512  | 764   | 366  | 695  | 610  | 532   | 627   | 1116  | 650   | 677   | 1192  | 804   | 773   | 791   | 1334     | Ndufb9   |
| Ndufc1   | 1706 | 1794  | 1815 | 1842 | 1736  | 1547 | 2571  | 1901  | 1556  | 1866  | 1900  | 1934  | 1905  | 2734  | 1712  | 1262 | 1896 | 1564 | 1715  | 1887  | 2475  | 1596  | 1658  | 2231  | 1849  | 2130  | 2098  | 2648     | Ndufc1   |
| Ndufc2   | 3009 | 3297  | 3307 | 3853 | 3648  | 3412 | 3843  | 3351  | 3292  | 3749  | 3344  | 3395  | 3349  | 3790  | 3152  | 2821 | 3403 | 3445 | 4020  | 4666  | 4244  | 2510  | 3389  | 3994  | 3700  | 4096  | 3553  | 3941     | Ndufc2   |
| Ndufc1   | 9703 | 8194  | 8587 | 7653 | 7736  | 7447 | 8035  | 11021 | 9462  | 8197  | 8758  | 9354  | 9046  | 9623  | 10558 | 8841 | 7795 | 7342 | 7642  | 8857  | 7411  | 9443  | 9375  | 8612  | 8711  | 9973  | 9596  | 9714     | Ndufc1   |
| Ndufc2   | 8870 | 10141 | 8979 | 8650 | 8025  | 8226 | 8018  | 9678  | 10324 | 9495  | 8690  | 9994  | 9755  | 9773  | 9154  | 9034 | 9101 | 8523 | 9032  | 8748  | 8469  | 8742  | 10354 | 9886  | 9442  | 11032 | 10560 | 10822    | Ndufc2   |
| Ndufc3   | 0    | 1     | 0    | 0    | 0     | 0    | 2     | 0     | 0     | 0     | 0     | 0     | 0     | 0     | 0     | 0    | 0    | 1    | 0     | 0     | 0     | 1     | 0     | 0     | 0     | 1     | 0     | 0        | Ndufc3   |
| Ndufc4   | 4139 | 3792  | 4287 | 3762 | 3580  | 3551 | 4312  | 4691  | 3921  | 4125  | 3520  | 4176  | 4121  | 4853  | 4477  | 3715 | 4025 | 3560 | 3717  | 4881  | 4262  | 3646  | 4113  | 4304  | 4160  | 4630  | 4462  | 5235     | Ndufc4   |
| Ndufc5   | 1865 | 2515  | 2447 | 2664 | 2442  | 2187 | 2930  | 1911  | 1874  | 2574  | 2448  | 2386  | 2464  | 3179  | 1900  | 1309 | 2739 | 2356 | 2413  | 2689  | 2789  | 1634  | 2090  | 2683  | 2400  | 2754  | 2439  | 2909     | Ndufc5   |
| Ndufc6   | 1684 | 2172  | 2436 | 2128 | 1820  | 1627 | 2251  | 1727  | 1823  | 2141  | 2134  | 2252  | 2250  |       |       |      |      |      |       |       |       |       |       |       |       |       |       |          |          |

|         |       |       |        |       |       |       |       |       |       |       |       |       |       |       |       |       |        |       |       |       |       |       |       |       |       |       |       |       |         |
|---------|-------|-------|--------|-------|-------|-------|-------|-------|-------|-------|-------|-------|-------|-------|-------|-------|--------|-------|-------|-------|-------|-------|-------|-------|-------|-------|-------|-------|---------|
| Nek3    | 265   | 358   | 437    | 402   | 302   | 329   | 296   | 521   | 477   | 552   | 462   | 640   | 593   | 749   | 331   | 277   | 416    | 344   | 356   | 291   | 321   | 647   | 491   | 584   | 638   | 705   | 553   | 691   | Nek3    |
| Nek4    | 2012  | 1756  | 2076   | 1814  | 1743  | 1751  | 1817  | 2783  | 2344  | 2409  | 2371  | 2897  | 2630  | 2793  | 2090  | 1646  | 1818   | 1716  | 1712  | 1749  | 1751  | 2610  | 2311  | 2631  | 2462  | 2682  | 3082  | 3017  | Nek4    |
| Nek5    | 20    | 35    | 19     | 24    | 38    | 48    | 26    | 56    | 68    | 49    | 41    | 47    | 92    | 29    | 41    | 38    | 20     | 14    | 25    | 35    | 41    | 74    | 96    | 30    | 42    | 31    | 12    | 38    | Nek5    |
| Nek6    | 4561  | 4617  | 3760   | 3863  | 3534  | 4143  | 3823  | 4035  | 4528  | 3790  | 4165  | 4740  | 4194  | 4494  | 4382  | 4145  | 3843   | 3674  | 3875  | 3752  | 3896  | 3379  | 4417  | 4282  | 4127  | 5083  | 4286  | 4454  | Nek6    |
| Nek7    | 2912  | 1978  | 2551   | 2383  | 2227  | 2632  | 2724  | 3135  | 2748  | 2546  | 3044  | 3091  | 2948  | 3195  | 2920  | 2466  | 2538   | 2553  | 2512  | 2770  | 2540  | 2697  | 3281  | 2984  | 2471  | 3140  | 3211  | 3191  | Nek7    |
| Nek8    | 642   | 709   | 716    | 787   | 620   | 676   | 565   | 590   | 751   | 701   | 878   | 717   | 852   | 637   | 644   | 758   | 778    | 766   | 634   | 617   | 587   | 570   | 779   | 735   | 617   | 921   | 818   | 720   | Nek8    |
| Nek9    | 9896  | 8822  | 8337   | 7900  | 8119  | 8737  | 7816  | 10832 | 11519 | 10982 | 11185 | 11712 | 12440 | 11355 | 8790  | 9111  | 7755   | 8358  | 8045  | 7700  | 7962  | 9892  | 11514 | 11181 | 10383 | 10778 | 11489 | 11678 | Nek9    |
| Nelfa   | 1974  | 2184  | 2380   | 2130  | 1902  | 1878  | 1880  | 2502  | 2782  | 2513  | 2642  | 3297  | 2939  | 2972  | 1869  | 1992  | 2255   | 1873  | 2125  | 1951  | 1852  | 2632  | 2591  | 3289  | 2778  | 3744  | 2912  | 3258  | Nelfa   |
| Nelfb   | 4645  | 4895  | 5616   | 4619  | 4472  | 3998  | 4075  | 5127  | 5379  | 5897  | 5835  | 6307  | 6187  | 6154  | 4259  | 4583  | 5055   | 4519  | 4791  | 3893  | 4166  | 6126  | 5502  | 6283  | 5731  | 6846  | 6365  | 6573  | Nelfb   |
| Nelfcd  | 5000  | 6154  | 5735   | 4858  | 4656  | 5057  | 4322  | 5296  | 5665  | 5574  | 5413  | 6896  | 6263  | 6355  | 4743  | 5048  | 5577   | 4427  | 5312  | 5140  | 4531  | 4904  | 5602  | 6285  | 6020  | 8181  | 7186  | 6792  | Nelfcd  |
| Nelfe   | 3878  | 4301  | 4100   | 3903  | 2925  | 3091  | 3394  | 1796  | 2150  | 2481  | 2207  | 2776  | 2564  | 2747  | 3305  | 3713  | 3901   | 3474  | 3382  | 2993  | 3309  | 1801  | 2060  | 2541  | 2325  | 3289  | 2705  | 2887  | Nelfe   |
| Nell1   | 253   | 263   | 191    | 366   | 641   | 417   | 378   | 512   | 591   | 488   | 693   | 270   | 381   | 246   | 306   | 287   | 245    | 370   | 401   | 321   | 516   | 708   | 645   | 310   | 463   | 178   | 235   | 328   | Nell1   |
| Nell2   | 5668  | 7121  | 6685   | 8344  | 10289 | 9039  | 9233  | 9272  | 9168  | 11027 | 9014  | 10824 | 8758  | 10554 | 6994  | 5044  | 8562   | 8566  | 10011 | 8451  | 9940  | 12489 | 9046  | 10652 | 11710 | 9935  | 10142 | 10427 | Nell2   |
| Nemf    | 10490 | 8467  | 9913   | 9731  | 8929  | 9389  | 9973  | 8668  | 7175  | 7403  | 7176  | 7842  | 7595  | 8183  | 10664 | 9728  | 9270   | 9425  | 9065  | 10844 | 9561  | 7315  | 7092  | 7415  | 7404  | 7479  | 8148  | 8039  | Nemf    |
| Nemp1   | 5975  | 6036  | 5012   | 5639  | 4286  | 4939  | 5602  | 2049  | 1864  | 1948  | 1930  | 2608  | 2589  | 2723  | 5664  | 5611  | 5101   | 5324  | 4945  | 5220  | 5508  | 1741  | 1707  | 2268  | 2199  | 2227  | 2867  | 2669  | Nemp1   |
| Nemp2   | 2746  | 2198  | 2210   | 2516  | 2520  | 2682  | 3061  | 2446  | 2428  | 2296  | 2412  | 2638  | 2454  | 2570  | 2951  | 2326  | 2268   | 2650  | 2526  | 2827  | 2590  | 2105  | 2168  | 2269  | 2389  | 2271  | 2632  | 2158  | Nemp2   |
| Nenf    | 644   | 661   | 583    | 596   | 641   | 609   | 598   | 1011  | 1029  | 997   | 1073  | 896   | 941   | 1136  | 609   | 568   | 607    | 633   | 588   | 654   | 711   | 959   | 1142  | 1005  | 1051  | 852   | 943   | 1162  | Nenf    |
| Neo1    | 16120 | 14749 | 12379  | 14752 | 17457 | 17457 | 16791 | 17565 | 18680 | 19040 | 18447 | 16227 | 17097 | 16783 | 15848 | 15601 | 12837  | 16413 | 16066 | 15513 | 17832 | 19794 | 17712 | 16923 | 19044 | 13253 | 16275 | 16107 | Neo1    |
| Nepr    | 2     | 2     | 0      | 0     | 5     | 4     | 7     | 1     | 1     | 5     | 0     | 0     | 1     | 2     | 1     | 9     | 7      | 3     | 3     | 4     | 3     | 8     | 3     | 1     | 4     | 6     | 3     | 1     | Nepr    |
| Nepro   | 1932  | 1844  | 1578   | 1663  | 1369  | 1562  | 1494  | 1962  | 1710  | 1620  | 1698  | 1887  | 1893  | 1744  | 1709  | 1726  | 1334   | 1372  | 1460  | 1604  | 1511  | 1369  | 1680  | 1611  | 1671  | 1485  | 2185  | 1985  | Nepro   |
| Nes     | 68751 | 81869 | 115280 | 81071 | 61102 | 70587 | 67799 | 43399 | 37952 | 43599 | 41667 | 80556 | 63788 | 74002 | 76324 | 75226 | 101487 | 70098 | 74370 | 71567 | 64725 | 39567 | 34797 | 56170 | 52419 | 74096 | 84858 | 80408 | Nes     |
| Net1    | 4444  | 2744  | 3200   | 2265  | 1631  | 2122  | 1843  | 3565  | 4195  | 3473  | 4904  | 3269  | 4017  | 3305  | 2723  | 3825  | 2557   | 2088  | 1818  | 1699  | 1705  | 2303  | 4303  | 3908  | 2513  | 4910  | 2984  | 3394  | Net1    |
| Neto1   | 495   | 362   | 516    | 669   | 875   | 858   | 859   | 725   | 694   | 707   | 718   | 649   | 462   | 679   | 530   | 333   | 550    | 500   | 895   | 621   | 813   | 1033  | 586   | 681   | 903   | 464   | 622   | 580   | Neto1   |
| Neto2   | 3714  | 3108  | 3086   | 4687  | 7539  | 6520  | 7441  | 10984 | 8914  | 8231  | 7511  | 8294  | 7102  | 8814  | 4814  | 3110  | 3945   | 5050  | 6547  | 7165  | 7539  | 10846 | 8952  | 7918  | 10209 | 5902  | 7901  | 7978  | Neto2   |
| Neu1    | 2271  | 2884  | 2791   | 3004  | 2445  | 2372  | 2132  | 1189  | 1170  | 1322  | 1286  | 1134  | 1073  | 1123  | 2267  | 2959  | 2479   | 2725  | 2321  | 2293  | 2246  | 1308  | 1233  | 1268  | 1246  | 1011  | 1099  | 1121  | Neu1    |
| Neu2    | 0     | 3     | 0      | 1     | 1     | 2     | 0     | 4     | 0     | 0     | 0     | 0     | 3     | 5     | 0     | 2     | 0      | 0     | 1     | 1     | 1     | 2     | 1     | 0     | 0     | 0     | 0     | 0     | Neu2    |
| Neu3    | 519   | 462   | 399    | 525   | 553   | 461   | 468   | 313   | 278   | 267   | 337   | 239   | 337   | 251   | 514   | 530   | 399    | 554   | 487   | 525   | 531   | 266   | 284   | 253   | 246   | 177   | 258   | 254   | Neu3    |
| Neu4    | 0     | 0     | 0      | 0     | 0     | 0     | 0     | 0     | 0     | 3     | 3     | 0     | 0     | 0     | 0     | 0     | 0      | 0     | 0     | 0     | 0     | 0     | 1     | 1     | 0     | 0     | 0     | 0     | Neu4    |
| Neur1a  | 789   | 922   | 893    | 943   | 1168  | 990   | 715   | 696   | 747   | 896   | 1038  | 545   | 584   | 495   | 728   | 1019  | 968    | 984   | 913   | 817   | 849   | 994   | 834   | 633   | 820   | 575   | 474   | 481   | Neur1a  |
| Neur1b  | 582   | 722   | 773    | 952   | 1114  | 898   | 977   | 576   | 770   | 972   | 795   | 604   | 454   | 589   | 566   | 681   | 1022   | 1107  | 1153  | 843   | 1024  | 971   | 693   | 920   | 997   | 732   | 482   | 509   | Neur1b  |
| Neur2   | 90    | 92    | 119    | 76    | 97    | 76    | 73    | 89    | 147   | 129   | 132   | 135   | 203   | 87    | 66    | 114   | 95     | 145   | 104   | 86    | 77    | 152   | 144   | 114   | 110   | 181   | 152   | 123   | Neur2   |
| Neur3   | 193   | 181   | 205    | 336   | 209   | 240   | 204   | 65    | 71    | 79    | 125   | 89    | 85    | 61    | 219   | 230   | 176    | 341   | 187   | 150   | 220   | 92    | 111   | 92    | 79    | 76    | 51    | 50    | Neur3   |
| Neur4   | 7260  | 9804  | 11391  | 12633 | 11742 | 10636 | 10353 | 7772  | 9600  | 11597 | 10387 | 12159 | 10143 | 10815 | 7457  | 8413  | 7272   | 12110 | 12619 | 8744  | 10946 | 11373 | 8662  | 12118 | 12538 | 10433 | 10330 | 10607 | Neur4   |
| Neurod1 | 1366  | 1239  | 1599   | 2023  | 2473  | 2149  | 2428  | 2925  | 2375  | 2600  | 2162  | 2936  | 2750  | 3246  | 1833  | 1204  | 1803   | 1928  | 2318  | 2125  | 2372  | 3009  | 2521  | 3130  | 3154  | 3280  | 2888  | 3446  | Neurod1 |
| Neurod2 | 453   | 528   | 248    | 1506  | 2608  | 1932  | 2714  | 2616  | 3597  | 3879  | 2821  | 2503  | 1327  | 2885  | 425   | 160   | 833    | 1870  | 2810  | 1761  | 2864  | 2521  | 2445  | 4609  | 5412  | 2557  | 1297  | 1440  | Neurod2 |
| Neurod4 | 559   | 594   | 885    | 384   | 373   | 372   | 367   | 890   | 494   | 496   | 406   | 988   | 1051  | 956   | 872   | 739   | 614    | 361   | 322   | 486   | 411   | 645   | 463   | 627   | 565   | 693   | 1256  | 1326  | Neurod4 |
| Neurod6 | 795   | 718   | 307    | 2081  | 5220  | 4134  | 6472  | 7551  | 9051  | 8097  | 6280  | 4978  | 2514  | 6118  | 1217  | 384   | 1063   | 3067  | 5537  | 5070  | 6119  | 4271  | 5818  | 9311  | 12413 | 4534  | 2718  | 3040  | Neurod6 |
| Neurog1 | 225   | 297   | 737    | 215   | 260   | 252   | 149   | 423   | 323   | 607   | 338   | 848   | 841   | 884   | 270   | 241   | 547    | 193   | 316   | 195   | 215   | 376   | 342   | 816   | 579   | 1029  | 807   | 977   | Neurog1 |
| Neurog2 | 2972  | 3235  | 6312   | 4345  | 5402  | 4709  | 6479  | 6031  | 4643  | 6285  | 4658  | 9519  | 5000  | 9683  | 3448  | 1488  | 6063   | 4095  | 7379  | 5901  | 5651  | 4944  | 4265  | 9839  | 8698  | 11160 | 8334  | 9317  | Neurog2 |
| Neurog3 | 5     | 12    | 9      | 14    | 7     | 2     | 9     | 17    | 25    | 15    | 14    | 17    | 10    | 23    | 13    | 13    | 6      | 6     | 3     | 7     | 3     | 12    | 14    | 32    | 28    | 28    | 28    | 7     | Neurog3 |
| Nexmf   | 1588  | 1045  | 779    | 1487  | 3107  | 3173  | 3261  | 6184  | 5650  | 4486  | 4646  | 3225  | 2828  | 3618  | 1774  | 1008  | 1134   | 1906  | 2544  | 3585  | 3488  | 5230  | 4992  | 3322  | 2920  | 1707  | 3196  | 2734  | Nexmf   |
| Nexn    | 311   | 234   | 468    | 219   | 208   | 344   | 171   | 474   | 524   | 438   | 1662  | 569   | 712   | 578   | 475   | 407   | 432    | 245   | 207   | 177   | 172   | 351   | 980   | 507   | 366   | 626   | 746   | 648   | Nexn    |
| Nf1     | 7399  | 6584  | 5614   | 7209  | 8041  | 8859  | 8695  | 9911  | 9690  | 9685  | 10246 | 10191 | 10003 | 10555 | 6936  | 6403  | 6218   | 6715  | 7518  | 7496  | 9349  | 9491  | 9032  | 7942  | 10899 | 7116  | 10404 | 9575  | Nf1     |
| Nf2     | 13627 | 14259 | 14560  | 14907 | 15387 | 14669 | 15064 | 12603 | 12833 | 13101 | 12920 | 13144 | 12414 | 13595 | 13630 | 13199 | 15366  | 14765 | 15932 | 13723 | 15389 | 13882 | 12515 | 13500 | 14301 | 13246 | 13381 | 13468 | Nf2     |
| Nfam1   | 230   | 241   | 339    | 170   | 184   | 215   | 161   | 263   | 318   | 262   | 381   | 325   | 460   | 335   | 194   | 295   | 224    | 235   | 175   | 210   | 200   | 304   | 377   | 319   | 308   | 347   | 432   | 421   | Nfam1   |
| Nfasc   | 8822  | 12255 | 11927  | 20096 | 24112 | 20315 | 20702 | 11779 | 12478 | 16438 | 12589 | 14404 | 14292 | 13320 | 11512 | 11664 | 17389  | 20673 | 21964 | 17046 | 21508 | 17829 | 10648 | 14427 | 18317 | 7697  | 12217 | 12092 | Nfasc   |
| Nfat5   | 20528 | 14867 | 11300  | 15193 | 17593 | 20439 | 18803 | 16391 | 15975 | 14332 | 17885 | 12353 | 14698 | 13225 | 18282 | 19048 | 12238  | 15225 | 14728 | 17137 | 19763 | 14105 | 15519 | 10978 | 13638 | 8286  | 13441 | 11160 | Nfat5   |
| Nfatc1  | 594   | 689   | 679    | 512   | 405   | 524   | 327   | 639   | 929   | 1036  | 1410  | 622   | 948   | 569   | 596   | 867   | 57     |       |       |       |       |       |       |       |       |       |       |       |         |

|           |       |       |       |       |       |       |       |       |       |       |       |       |       |       |       |       |       |       |       |       |       |       |       |       |       |       |       |        |           |
|-----------|-------|-------|-------|-------|-------|-------|-------|-------|-------|-------|-------|-------|-------|-------|-------|-------|-------|-------|-------|-------|-------|-------|-------|-------|-------|-------|-------|--------|-----------|
| Ngef      | 332   | 434   | 627   | 475   | 767   | 541   | 559   | 204   | 232   | 335   | 275   | 241   | 268   | 234   | 400   | 410   | 521   | 522   | 673   | 513   | 654   | 374   | 294   | 303   | 348   | 176   | 182   | 220    | Ngef      |
| Ngef      | 96    | 54    | 73    | 35    | 9     | 45    | 18    | 72    | 132   | 87    | 149   | 61    | 120   | 89    | 51    | 107   | 46    | 70    | 17    | 12    | 13    | 75    | 168   | 126   | 47    | 45    | 101   | 78     | Ngef      |
| Nefr      | 2175  | 2315  | 2196  | 1500  | 2603  | 1198  | 971   | 2306  | 3032  | 2642  | 3678  | 1765  | 3098  | 1572  | 2139  | 3419  | 1673  | 1816  | 1233  | 1054  | 1041  | 3252  | 3333  | 1632  | 1989  | 1685  | 1973  | 1870   | Nefr      |
| Ngly1     | 1543  | 1205  | 1284  | 1305  | 1375  | 1393  | 1502  | 2391  | 2158  | 1768  | 2064  | 1924  | 1813  | 1968  | 1680  | 1334  | 1155  | 1361  | 1276  | 1545  | 1318  | 1858  | 2275  | 1914  | 1808  | 2060  | 1898  | 1919   | Ngly1     |
| Ngp       | 20    | 3     | 11    | 10    | 15    | 10    | 15    | 16    | 45    | 23    | 75    | 55    | 85    | 19    | 24    | 39    | 15    | 23    | 16    | 7     | 7     | 43    | 83    | 74    | 9     | 65    | 66    | 51     | Ngp       |
| Ngrn      | 1957  | 2034  | 2042  | 2143  | 1965  | 1981  | 2152  | 2027  | 2016  | 1852  | 1862  | 1987  | 2081  | 2030  | 1895  | 1710  | 2064  | 1917  | 2179  | 2296  | 2145  | 1796  | 1946  | 2031  | 2025  | 2097  | 1972  | 2029   | Ngrn      |
| Nhej1     | 145   | 153   | 137   | 88    | 108   | 113   | 123   | 269   | 275   | 236   | 274   | 256   | 294   | 260   | 153   | 125   | 112   | 123   | 89    | 100   | 97    | 227   | 305   | 223   | 229   | 283   | 314   | 324    | Nhej1     |
| Nhh1      | 1613  | 2467  | 2306  | 2843  | 2135  | 2151  | 1961  | 3472  | 2432  | 3464  | 2837  | 3783  | 5297  | 3991  | 2198  | 2070  | 2634  | 2401  | 2181  | 1934  | 2190  | 2949  | 2393  | 3778  | 3726  | 4305  | 3569  | 4628   | Nhh1      |
| Nhh2      | 1836  | 2199  | 3213  | 2514  | 3629  | 2971  | 2556  | 8405  | 5085  | 6878  | 5505  | 8218  | 11917 | 8613  | 3181  | 2354  | 3539  | 2103  | 3003  | 3652  | 2636  | 8159  | 5994  | 6518  | 7011  | 7496  | 10168 | 10790  | Nhh2      |
| Nhirc1    | 648   | 663   | 769   | 854   | 907   | 740   | 761   | 380   | 407   | 393   | 401   | 355   | 353   | 456   | 642   | 586   | 820   | 919   | 839   | 722   | 886   | 543   | 447   | 429   | 453   | 339   | 334   | 350    | Nhirc1    |
| Nhirc2    | 3125  | 2725  | 2574  | 2637  | 2862  | 3172  | 3035  | 4931  | 4942  | 4446  | 4308  | 5130  | 4815  | 5223  | 2835  | 2581  | 2444  | 2346  | 2982  | 3183  | 3154  | 3878  | 4522  | 4202  | 4738  | 4013  | 5267  | 5020   | Nhirc2    |
| Nhirc3    | 2502  | 2369  | 2035  | 2176  | 1814  | 2016  | 1906  | 2332  | 2380  | 2241  | 2371  | 2440  | 2270  | 2302  | 2404  | 2315  | 1912  | 1791  | 1646  | 2093  | 1855  | 2115  | 2334  | 2163  | 2113  | 2150  | 2580  | 2375   | Nhirc3    |
| Nhirc4    | 0     | 3     | 4     | 2     | 4     | 0     | 0     | 0     | 2     | 2     | 3     | 4     | 9     | 1     | 4     | 3     | 0     | 10    | 2     | 0     | 2     | 5     | 3     | 0     | 1     | 5     | 0     | 12     | Nhirc4    |
| Nhp2      | 3785  | 4625  | 4393  | 3906  | 2881  | 3341  | 3311  | 2419  | 2824  | 2550  | 2446  | 2821  | 3006  | 3130  | 3645  | 3657  | 4096  | 3644  | 3718  | 4229  | 3522  | 1860  | 2728  | 2851  | 2650  | 3841  | 3704  | 3364   | Nhp2      |
| Nhs       | 3632  | 2521  | 3216  | 3109  | 2937  | 3294  | 2899  | 3033  | 2699  | 3017  | 3243  | 3711  | 3918  | 3663  | 3475  | 3111  | 2699  | 2693  | 2746  | 2748  | 2969  | 2816  | 3004  | 3016  | 2883  | 2857  | 3977  | 3957   | Nhs       |
| Nhsl1     | 3527  | 3850  | 4273  | 5394  | 6449  | 5419  | 4964  | 4427  | 4932  | 5796  | 5649  | 5428  | 5584  | 5041  | 3967  | 4295  | 5106  | 5026  | 5509  | 4547  | 5240  | 5573  | 4774  | 5574  | 6148  | 4175  | 4786  | 4721   | Nhsl1     |
| Nhsl2     | 2095  | 1715  | 1507  | 1458  | 1710  | 1814  | 1338  | 1903  | 2244  | 2213  | 2921  | 2030  | 2588  | 2104  | 1756  | 2217  | 1455  | 1516  | 1425  | 1388  | 1448  | 2052  | 2530  | 1761  | 1926  | 1690  | 2358  | 1869   | Nhsl2     |
| Niban1    | 329   | 269   | 204   | 201   | 295   | 297   | 218   | 424   | 536   | 384   | 1083  | 408   | 480   | 325   | 287   | 327   | 185   | 308   | 231   | 284   | 216   | 364   | 973   | 381   | 303   | 322   | 422   | 324    | Niban1    |
| Niban2    | 5029  | 5723  | 5731  | 5406  | 5470  | 5207  | 3796  | 3600  | 4813  | 5066  | 5029  | 3704  | 4175  | 3328  | 4821  | 6555  | 5277  | 5548  | 5097  | 4057  | 4033  | 4236  | 5202  | 4516  | 4298  | 4257  | 3557  | 3463   | Niban2    |
| Niban3    | 287   | 411   | 472   | 468   | 532   | 392   | 386   | 321   | 354   | 465   | 440   | 369   | 371   | 352   | 265   | 441   | 568   | 494   | 504   | 343   | 442   | 471   | 352   | 378   | 405   | 321   | 339   | 331    | Niban3    |
| Nicn1     | 4315  | 4970  | 4282  | 4509  | 5063  | 4662  | 5190  | 4991  | 4838  | 4707  | 4328  | 4104  | 4297  | 4379  | 4977  | 4397  | 4588  | 4884  | 4997  | 5368  | 5176  | 5399  | 4799  | 4293  | 4925  | 3508  | 4221  | 4317   | Nicn1     |
| Nid1      | 15363 | 14638 | 14601 | 11025 | 11381 | 12331 | 7511  | 9795  | 12284 | 12437 | 16090 | 12671 | 16500 | 11959 | 14310 | 19413 | 12271 | 13231 | 7631  | 8741  | 7992  | 14400 | 15927 | 11347 | 11736 | 11199 | 13350 | 11932  | Nid1      |
| Nid2      | 7686  | 9644  | 10001 | 8529  | 7436  | 7824  | 5646  | 5255  | 7615  | 7774  | 11186 | 7156  | 9131  | 6242  | 7755  | 10921 | 8416  | 9535  | 6685  | 5950  | 6036  | 8194  | 10642 | 7474  | 6940  | 7304  | 6940  | 6157   | Nid2      |
| Nif3i1    | 2804  | 2714  | 2591  | 2305  | 2419  | 2371  | 2699  | 3765  | 3353  | 3012  | 3119  | 3598  | 3404  | 3835  | 2970  | 2480  | 2517  | 2183  | 2563  | 2663  | 2506  | 3148  | 3389  | 3343  | 3234  | 3929  | 3620  | 3614   | Nif3i1    |
| Nifk      | 4731  | 4302  | 4652  | 4016  | 3338  | 3686  | 3981  | 4703  | 4005  | 3510  | 3712  | 4329  | 4077  | 4259  | 4967  | 4403  | 4153  | 3609  | 3505  | 4540  | 3833  | 3811  | 3985  | 4008  | 3663  | 5071  | 4264  | 4732   | Nifk      |
| Nim1k     | 633   | 718   | 682   | 521   | 709   | 701   | 732   | 492   | 462   | 337   | 401   | 449   | 260   | 487   | 641   | 551   | 600   | 566   | 754   | 870   | 721   | 485   | 393   | 463   | 448   | 507   | 442   | 414    | Nim1k     |
| Nin       | 4760  | 4029  | 2667  | 3390  | 4054  | 4496  | 3886  | 5348  | 5277  | 4938  | 5671  | 4687  | 5074  | 4919  | 4410  | 4831  | 3217  | 3514  | 3479  | 4054  | 4118  | 4709  | 5529  | 4491  | 5230  | 3478  | 5273  | 4383   | Nin       |
| Ninj1     | 1185  | 1380  | 938   | 973   | 875   | 1030  | 875   | 308   | 510   | 427   | 456   | 302   | 452   | 301   | 988   | 1277  | 892   | 1084  | 966   | 1126  | 822   | 307   | 566   | 354   | 345   | 377   | 303   | 298    | Ninj1     |
| Ninj2     | 0     | 1     | 0     | 0     | 0     | 3     | 0     | 5     | 5     | 2     | 8     | 0     | 3     | 0     | 1     | 0     | 0     | 1     | 0     | 1     | 0     | 8     | 1     | 0     | 0     | 0     | 0     | 2      | Ninj2     |
| Ninl      | 2675  | 2656  | 2702  | 2421  | 2237  | 2416  | 2692  | 2363  | 2382  | 2507  | 2088  | 3477  | 2870  | 3437  | 2242  | 2263  | 2478  | 2319  | 2454  | 2636  | 2368  | 1668  | 1967  | 2858  | 2585  | 3289  | 3627  | 3469   | Ninl      |
| Nip7      | 3885  | 3788  | 3236  | 3155  | 2738  | 2808  | 3013  | 3225  | 3049  | 2646  | 2748  | 3170  | 3098  | 2842  | 3775  | 3714  | 3225  | 2928  | 3060  | 3578  | 2794  | 2493  | 3183  | 3020  | 2923  | 3684  | 3226  | 3213   | Nip7      |
| Nipa1     | 1354  | 1261  | 1211  | 1467  | 1991  | 1726  | 1814  | 2122  | 2043  | 1813  | 1877  | 1822  | 2020  | 1953  | 1489  | 1282  | 1308  | 1499  | 1695  | 1855  | 1819  | 2189  | 1922  | 1696  | 2097  | 1147  | 1878  | 1862   | Nipa1     |
| Nipa2     | 5888  | 4736  | 5103  | 5187  | 4765  | 5167  | 5539  | 4583  | 3631  | 3387  | 3572  | 4228  | 3961  | 4158  | 6136  | 5675  | 5139  | 5294  | 4733  | 5401  | 5198  | 3893  | 3698  | 3505  | 3837  | 4190  | 4210  | 4316   | Nipa2     |
| Nipal1    | 275   | 231   | 273   | 172   | 114   | 219   | 120   | 93    | 98    | 79    | 64    | 90    | 58    | 71    | 278   | 262   | 147   | 228   | 120   | 174   | 128   | 45    | 129   | 89    | 39    | 95    | 46    | 74     | Nipal1    |
| Nipal2    | 102   | 53    | 60    | 55    | 89    | 118   | 91    | 324   | 330   | 277   | 330   | 168   | 197   | 181   | 73    | 59    | 48    | 55    | 85    | 62    | 331   | 443   | 273   | 228   | 161   | 144   | 172   | Nipal2 |           |
| Nipal3    | 3094  | 3883  | 3841  | 4220  | 4721  | 3673  | 4014  | 1646  | 1767  | 2056  | 1811  | 1719  | 1559  | 1545  | 3266  | 3806  | 4198  | 4316  | 4623  | 3705  | 4278  | 2246  | 1719  | 1162  | 2219  | 1343  | 1374  | 1556   | Nipal3    |
| Nipal4    | 142   | 172   | 134   | 87    | 52    | 116   | 63    | 90    | 87    | 66    | 70    | 98    | 127   | 109   | 161   | 194   | 96    | 111   | 51    | 67    | 68    | 37    | 124   | 118   | 76    | 102   | 141   | 161    | Nipal4    |
| Nipbl     | 18121 | 14753 | 11369 | 14586 | 15226 | 18677 | 18471 | 20359 | 17923 | 17259 | 16831 | 18397 | 18397 | 19974 | 18509 | 16140 | 13063 | 14077 | 14911 | 18605 | 18375 | 14801 | 16942 | 14315 | 17086 | 11888 | 20711 | 17858  | Nipbl     |
| Nipsnap1  | 5044  | 4974  | 4478  | 4912  | 5276  | 4945  | 5339  | 6149  | 5506  | 5719  | 5099  | 5677  | 5754  | 6107  | 5144  | 4552  | 4682  | 4525  | 5567  | 5827  | 5186  | 6158  | 5305  | 5940  | 6437  | 6081  | 5793  | 6169   | Nipsnap1  |
| Nipsnap2  | 2728  | 2560  | 2541  | 2399  | 2372  | 2705  | 2380  | 3815  | 4079  | 4392  | 4304  | 4607  | 4314  | 4880  | 2563  | 2509  | 2450  | 2240  | 2146  | 2612  | 2434  | 3663  | 4159  | 4149  | 4296  | 5213  | 4487  | 4686   | Nipsnap2  |
| Nipsnap3a | 0     | 0     | 0     | 0     | 0     | 0     | 0     | 1     | 3     | 0     | 0     | 0     | 2     | 0     | 0     | 0     | 0     | 0     | 0     | 0     | 0     | 1     | 0     | 0     | 0     | 0     | 0     | 0      | Nipsnap3a |
| Nipsnap3b | 2457  | 2527  | 2446  | 2456  | 2480  | 2590  | 2996  | 3154  | 2633  | 2242  | 2128  | 2503  | 2586  | 2888  | 3053  | 2344  | 2385  | 2450  | 2692  | 3056  | 2921  | 3106  | 2735  | 2176  | 2519  | 2293  | 2705  | 3004   | Nipsnap3b |
| Nisch     | 30179 | 33151 | 30058 | 31587 | 35699 | 34610 | 30486 | 41573 | 50223 | 51319 | 49003 | 54164 | 50240 | 47560 | 28972 | 31563 | 32244 | 32429 | 36629 | 28952 | 32634 | 51315 | 47962 | 48164 | 50104 | 43160 | 48972 | 46687  | Nisch     |
| Nit1      | 2952  | 3285  | 3189  | 3294  | 3065  | 2779  | 3305  | 2409  | 2257  | 2378  | 2454  | 2640  | 2459  | 2882  | 3022  | 2679  | 3445  | 3300  | 3290  | 2877  | 3394  | 2486  | 2388  | 2712  | 2849  | 2826  | 2833  | 2709   | Nit1      |
| Nit2      | 1788  | 1498  | 1498  | 1281  | 1191  | 1429  | 1483  | 1937  | 1915  | 1492  | 1849  | 1549  | 1593  | 1823  | 1600  | 1467  | 1350  | 1348  | 1204  | 1513  | 1416  | 1557  | 1939  | 1739  | 1427  | 1845  | 1725  | 1841   | Nit2      |
| Nkain1    | 332   | 300   | 242   | 264   | 287   | 292   | 226   | 393   | 278   | 258   | 336   | 343   | 363   | 336   | 339   | 325   | 293   | 237   | 303   | 294   | 281   | 414   | 278   | 315   | 311   | 306   | 356   | 299    | Nkain1    |
| Nkain2    | 385   | 329   | 172   | 607   | 1116  | 864   | 1123  | 879   | 724   | 676   | 710   | 458   | 367   | 544   | 435   | 266   | 355   | 836   | 967   | 921   | 1074  | 941   | 652   | 768   | 932   | 394   | 323   | 319    | Nkain2    |
| Nkain3    | 916   | 844   | 168   | 393   | 582   | 1381  | 1006  | 1413  | 1214  | 633   | 780   | 530   | 724   | 664   | 1064  | 861   | 216   | 380   | 478   | 1566  | 1361  | 748   | 1022  | 273   | 867   | 160   | 913   | 472    | Nkain3    |
| Nkain4    | 720   | 986   |       |       |       |       |       |       |       |       |       |       |       |       |       |       |       |       |       |       |       |       |       |       |       |       |       |        |           |

|         |       |        |       |        |        |        |        |        |        |        |       |        |       |        |       |       |        |        |        |        |        |        |       |        |        |        |       |        |         |        |
|---------|-------|--------|-------|--------|--------|--------|--------|--------|--------|--------|-------|--------|-------|--------|-------|-------|--------|--------|--------|--------|--------|--------|-------|--------|--------|--------|-------|--------|---------|--------|
| Nlrc3   | 134   | 200    | 159   | 182    | 214    | 191    | 202    | 156    | 157    | 172    | 222   | 212    | 198   | 177    | 173   | 157   | 165    | 179    | 153    | 189    | 247    | 216    | 180   | 175    | 232    | 138    | 212   | 147    | Nlrc3   |        |
| Nlrc4   | 9     | 13     | 7     | 4      | 13     | 29     | 9      | 13     | 21     | 17     | 24    | 16     | 16    | 22     | 15    | 15    | 13     | 7      | 9      | 10     | 9      | 22     | 36    | 12     | 21     | 24     | 23    | 14     | Nlrc4   |        |
| Nlrc5   | 13    | 21     | 7     | 7      | 53     | 26     | 19     | 32     | 49     | 34     | 36    | 34     | 22    | 21     | 42    | 38    | 16     | 25     | 19     | 23     | 38     | 62     | 43    | 29     | 44     | 29     | 24    | 31     | Nlrc5   |        |
| Nlrp10  | 3     | 0      | 0     | 1      | 2      | 0      | 3      | 9      | 2      | 1      | 2     | 0      | 1     | 1      | 1     | 1     | 0      | 0      | 0      | 3      | 0      | 5      | 3     | 3      | 1      | 4      | 1     | 1      | Nlrp10  |        |
| Nlrp14  | 0     | 0      | 0     | 0      | 0      | 0      | 0      | 0      | 2      | 0      | 0     | 0      | 1     | 0      | 0     | 0     | 0      | 0      | 0      | 0      | 0      | 0      | 0     | 0      | 0      | 0      | 0     | 0      | 0       | Nlrp14 |
| Nlrp1a  | 1     | 0      | 0     | 0      | 0      | 0      | 0      | 1      | 1      | 0      | 0     | 0      | 1     | 0      | 1     | 0     | 0      | 0      | 0      | 0      | 0      | 0      | 0     | 2      | 0      | 0      | 0     | 6      | 1       | Nlrp1a |
| Nlrp1b  | 1     | 9      | 0     | 1      | 5      | 2      | 0      | 7      | 5      | 7      | 7     | 2      | 2     | 5      | 0     | 9     | 2      | 2      | 5      | 6      | 4      | 5      | 14    | 8      | 3      | 1      | 0     | 13     | Nlrp1b  |        |
| Nlrp3   | 12    | 16     | 16    | 8      | 15     | 7      | 10     | 22     | 43     | 26     | 39    | 29     | 52    | 51     | 7     | 7     | 12     | 28     | 15     | 15     | 13     | 37     | 50    | 36     | 22     | 17     | 19    | 25     | Nlrp3   |        |
| Nlrp4a  | 0     | 0      | 0     | 0      | 0      | 0      | 0      | 0      | 1      | 0      | 0     | 0      | 0     | 1      | 0     | 0     | 0      | 0      | 0      | 0      | 0      | 0      | 1     | 0      | 1      | 0      | 0     | 0      | 0       | Nlrp4a |
| Nlrp4c  | 1     | 0      | 0     | 0      | 0      | 0      | 0      | 0      | 0      | 0      | 0     | 0      | 0     | 0      | 1     | 2     | 7      | 0      | 0      | 0      | 1      | 0      | 0     | 0      | 0      | 4      | 0     | 0      | 0       | Nlrp4c |
| Nlrp4f  | 7     | 5      | 3     | 4      | 5      | 5      | 16     | 2      | 10     | 8      | 13    | 1      | 6     | 10     | 20    | 8     | 5      | 6      | 5      | 7      | 5      | 5      | 3     | 2      | 6      | 9      | 10    | 5      | Nlrp4f  |        |
| Nlrp5   | 0     | 0      | 0     | 0      | 0      | 0      | 0      | 0      | 0      | 0      | 0     | 0      | 0     | 0      | 0     | 2     | 0      | 1      | 0      | 0      | 0      | 0      | 1     | 0      | 0      | 0      | 0     | 0      | 0       | Nlrp5  |
| Nlrp6   | 28    | 18     | 15    | 16     | 16     | 17     | 28     | 16     | 13     | 20     | 14    | 24     | 10    | 12     | 18    | 16    | 21     | 19     | 19     | 24     | 25     | 20     | 17    | 16     | 9      | 17     | 6     | 12     | Nlrp6   |        |
| Nlrp9b  | 0     | 0      | 0     | 0      | 0      | 0      | 0      | 0      | 2      | 0      | 0     | 0      | 0     | 0      | 0     | 0     | 0      | 0      | 0      | 0      | 0      | 0      | 1     | 0      | 0      | 0      | 0     | 0      | 0       | Nlrp9b |
| Nlrx1   | 131   | 122    | 161   | 169    | 191    | 191    | 143    | 379    | 461    | 411    | 527   | 425    | 422   | 332    | 116   | 149   | 184    | 219    | 167    | 157    | 182    | 354    | 559   | 449    | 411    | 510    | 415   | 363    | Nlrx1   |        |
| Nmb     | 150   | 230    | 162   | 222    | 218    | 225    | 273    | 114    | 134    | 170    | 150   | 165    | 159   | 199    | 167   | 148   | 189    | 204    | 233    | 169    | 267    | 217    | 120   | 195    | 170    | 173    | 151   | 191    | Nmb     |        |
| Nmbr    | 30    | 41     | 20    | 27     | 24     | 35     | 22     | 38     | 55     | 36     | 37    | 40     | 39    | 40     | 21    | 29    | 27     | 21     | 30     | 45     | 46     | 77     | 52    | 33     | 43     | 33     | 38    | 43     | Nmbr    |        |
| Nmd3    | 4383  | 3612   | 3669  | 3840   | 3247   | 3478   | 3941   | 3226   | 2901   | 2593   | 2723  | 3014   | 2967  | 3025   | 4469  | 3987  | 3600   | 3516   | 3397   | 4050   | 3486   | 2769   | 2924  | 2865   | 2744   | 3305   | 3118  | 3418   | Nmd3    |        |
| Nme1    | 2005  | 1883   | 1486  | 1866   | 1939   | 1738   | 2390   | 2668   | 1896   | 2111   | 1796  | 1892   | 1714  | 2587   | 2254  | 1494  | 1899   | 1812   | 1842   | 2183   | 2290   | 2386   | 1805  | 2142   | 2074   | 2062   | 1929  | 2680   | Nme1    |        |
| Nme2    | 85    | 59     | 99    | 105    | 120    | 100    | 122    | 49     | 49     | 49     | 62    | 64     | 56    | 60     | 94    | 51    | 89     | 87     | 100    | 105    | 88     | 89     | 45    | 64     | 97     | 42     | 65    | 82     | Nme2    |        |
| Nme4    | 1065  | 1037   | 973   | 693    | 570    | 694    | 624    | 1089   | 1269   | 1103   | 1199  | 1113   | 1245  | 1166   | 947   | 1049  | 875    | 695    | 623    | 710    | 634    | 762    | 1326  | 1235   | 812    | 1327   | 1188  | 1253   | Nme4    |        |
| Nme5    | 291   | 289    | 249   | 350    | 240    | 245    | 273    | 167    | 162    | 153    | 157   | 191    | 248   | 125    | 316   | 298   | 256    | 316    | 273    | 292    | 293    | 247    | 234   | 160    | 166    | 127    | 134   | 165    | Nme5    |        |
| Nme6    | 863   | 942    | 1011  | 804    | 757    | 674    | 808    | 1202   | 1191   | 980    | 1053  | 1341   | 1275  | 1361   | 878   | 757   | 917    | 745    | 832    | 927    | 760    | 1111   | 1192  | 1325   | 1095   | 1695   | 1603  | 1466   | Nme6    |        |
| Nme7    | 2208  | 1991   | 2001  | 1841   | 1537   | 1584   | 2008   | 1834   | 1755   | 1488   | 1365  | 1706   | 1462  | 1842   | 2072  | 2004  | 1793   | 1717   | 1850   | 2105   | 1827   | 1322   | 1621  | 1705   | 1496   | 2070   | 1655  | 1966   | Nme7    |        |
| Nme8    | 2     | 6      | 2     | 1      | 7      | 2      | 7      | 4      | 7      | 3      | 4     | 1      | 0     | 1      | 13    | 8     | 8      | 6      | 6      | 8      | 2      | 5      | 10    | 2      | 3      | 3      | 8     | 0      | Nme8    |        |
| Nme9    | 13    | 27     | 2     | 15     | 45     | 30     | 13     | 15     | 30     | 36     | 26    | 25     | 27    | 17     | 26    | 51    | 24     | 42     | 24     | 30     | 25     | 13     | 43    | 11     | 16     | 14     | 7     | 12     | Nme9    |        |
| Nmi     | 136   | 95     | 121   | 51     | 77     | 92     | 65     | 244    | 261    | 265    | 258   | 234    | 266   | 233    | 141   | 138   | 56     | 68     | 129    | 100    | 90     | 197    | 330   | 239    | 180    | 293    | 277   | 252    | Nmi     |        |
| Nminat1 | 158   | 200    | 203   | 197    | 200    | 179    | 178    | 629    | 677    | 616    | 610   | 733    | 649   | 868    | 189   | 139   | 261    | 171    | 207    | 211    | 190    | 617    | 680   | 820    | 740    | 940    | 875   | 800    | Nminat1 |        |
| Nminat2 | 2249  | 3087   | 2693  | 4412   | 6374   | 4932   | 5022   | 3927   | 4066   | 4920   | 4121  | 3882   | 3633  | 3764   | 3237  | 2997  | 3955   | 5197   | 5191   | 4395   | 5316   | 6400   | 3896  | 4502   | 5882   | 3092   | 3199  | 3503   | Nminat2 |        |
| Nminat3 | 296   | 247    | 224   | 334    | 186    | 200    | 196    | 94     | 116    | 109    | 101   | 108    | 110   | 122    | 219   | 206   | 246    | 211    | 251    | 168    | 206    | 67     | 106   | 127    | 87     | 119    | 120   | 122    | Nminat3 |        |
| Nmral1  | 4451  | 5294   | 5186  | 4211   | 3471   | 4138   | 3756   | 4496   | 4486   | 4225   | 3982  | 5861   | 5314  | 5667   | 3683  | 4267  | 4825   | 3785   | 4868   | 4406   | 4035   | 3278   | 3855  | 5026   | 4646   | 6892   | 6143  | 5445   | Nmral1  |        |
| Nmrrk1  | 743   | 599    | 636   | 520    | 514    | 542    | 394    | 383    | 481    | 410    | 469   | 311    | 378   | 268    | 661   | 785   | 470    | 551    | 422    | 407    | 388    | 339    | 419   | 322    | 272    | 279    | 279   | 298    | Nmrrk1  |        |
| Nmrrk2  | 17    | 32     | 23    | 48     | 45     | 16     | 27     | 5      | 1      | 2      | 16    | 9      | 0     | 1      | 17    | 20    | 36     | 46     | 50     | 45     | 42     | 12     | 7     | 9      | 3      | 11     | 2     | 2      | Nmrrk2  |        |
| Nms     | 15    | 7      | 14    | 2      | 5      | 3      | 12     | 9      | 5      | 21     | 8     | 4      | 14    | 3      | 15    | 17    | 9      | 3      | 6      | 6      | 4      | 3      | 10    | 3      | 11     | 10     | 13    | 8      | Nms     |        |
| Nmt1    | 7827  | 8324   | 8082  | 7138   | 6793   | 6585   | 6881   | 6791   | 6522   | 6724   | 6212  | 7114   | 6823  | 7216   | 7184  | 7499  | 7509   | 7477   | 7305   | 6778   | 7098   | 6605   | 6502  | 7104   | 6753   | 7628   | 7296  | 7332   | Nmt1    |        |
| Nmt2    | 13506 | 11759  | 11814 | 12863  | 13209  | 13581  | 14902  | 9432   | 8062   | 8482   | 7884  | 8568   | 8471  | 9297   | 13508 | 11831 | 11514  | 12744  | 12447  | 13798  | 14551  | 8736   | 7445  | 7598   | 9220   | 7177   | 8796  | 8710   | Nmt2    |        |
| Nmu     | 7     | 10     | 5     | 5      | 3      | 0      | 1      | 1      | 1      | 0      | 10    | 1      | 2     | 0      | 5     | 4     | 7      | 4      | 2      | 1      | 5      | 3      | 4     | 0      | 0      | 7      | 1     | 1      | Nmu     |        |
| Nmur1   | 7     | 3      | 0     | 2      | 2      | 1      | 0      | 4      | 8      | 1      | 8     | 0      | 1     | 3      | 4     | 6     | 7      | 0      | 2      | 1      | 0      | 2      | 5     | 4      | 0      | 2      | 3     | 0      | Nmur1   |        |
| Nmur2   | 5     | 9      | 3     | 13     | 16     | 17     | 17     | 4      | 9      | 4      | 13    | 2      | 3     | 6      | 5     | 6     | 5      | 20     | 3      | 16     | 9      | 5      | 4     | 1      | 10     | 4      | 5     | 0      | Nmur2   |        |
| Nnat    | 77766 | 101529 | 70497 | 109486 | 108659 | 101148 | 131245 | 110235 | 101034 | 109208 | 82871 | 105318 | 72583 | 128902 | 88481 | 62529 | 101136 | 104321 | 121363 | 122403 | 141850 | 125550 | 91715 | 120591 | 126504 | 113771 | 98583 | 113703 | Nnat    |        |
| Nnmt    | 24    | 34     | 36    | 30     | 15     | 58     | 11     | 38     | 75     | 70     | 98    | 70     | 74    | 60     | 50    | 48    | 25     | 26     | 15     | 17     | 13     | 40     | 95    | 57     | 46     | 66     | 71    | 76     | Nnmt    |        |
| Nnt     | 182   | 105    | 81    | 92     | 78     | 117    | 107    | 150    | 109    | 65     | 90    | 127    | 111   | 129    | 173   | 104   | 60     | 58     | 65     | 146    | 126    | 74     | 92    | 97     | 94     | 71     | 157   | 121    | Nnt     |        |
| Noa1    | 2528  | 2784   | 2695  | 3160   | 2430   | 2328   | 2566   | 1360   | 1352   | 1518   | 1416  | 1582   | 1518  | 1549   | 2429  | 2557  | 2802   | 2932   | 2682   | 2180   | 2639   | 1546   | 1254  | 1531   | 1580   | 1770   | 1553  | 1613   | Noa1    |        |
| Nob1    | 2553  | 3391   | 2824  | 2925   | 2518   | 2461   | 2396   | 2831   | 3142   | 3128   | 2862  | 2994   | 2918  | 3185   | 2322  | 2709  | 2758   | 2796   | 2745   | 2766   | 2496   | 2677   | 2871  | 3117   | 2995   | 3455   | 3256  | 3197   | Nob1    |        |
| Nobox   | 5     | 1      | 0     | 4      | 0      | 1      | 3      | 4      | 3      | 4      | 3     | 0      | 0     | 6      | 1     | 1     | 0      | 2      | 2      | 0      | 2      | 2      | 3     | 5      | 5      | 0      | 0     | 1      | Nobox   |        |
| Noc2l   | 8436  | 9606   | 10335 | 9742   | 8106   | 8615   | 8801   | 7284   | 7813   | 7821   | 8089  | 9072   | 8469  | 8773   | 7801  | 8165  | 9938   | 9198   | 9503   | 7716   | 8703   | 7541   | 7646  | 9031   | 8376   | 10457  | 8883  | 9174   | Noc2l   |        |
| Noc3l   | 4265  | 4222   | 3993  | 4043   | 3121   | 3262   | 3784   | 3687   | 3151   | 3117   | 3128  | 3636   | 3299  | 3792   | 4296  | 4268  | 3905   | 3899   | 3324   | 3955   | 3673   | 3071   | 3086  | 3203   | 3404   | 3498   | 3468  | 3957   | Noc3l   |        |
| Noc4l   | 2524  | 3289   | 2625  | 2453   | 2036   | 2006   | 2105   | 1506   | 1893   | 1591   | 1593  | 1928   | 1897  | 1818   | 2478  | 2685  | 2457   | 2170   | 2146   | 2144   | 1994   | 1355   | 1532  | 1709   | 1729   | 2449   | 1826  | 1963   | Noc4l   |        |
| Noct    | 1979  | 2099   | 3059  | 3578   | 3621   | 3038   | 3352   | 1649   | 1656   | 2296   | 2245  | 1939   | 1937  | 1862   | 2057  | 2171  | 3284   | 3935   | 3516   | 2304   | 3372   | 2836   | 1718  | 2037   | 2243   | 1982   | 1619  | 1918   | Noct    |        |
| Nod1    | 257   | 355    | 307   | 264    | 260    | 325    | 144    | 307    | 451    | 396    | 564   | 341    | 488   | 339    | 270   | 371   | 293    | 285    | 203    | 198    | 201    | 434    | 479   | 308    | 400    | 365    | 342   | 275    | Nod1    |        |
| Nod2    | 268   | 242    | 245   | 296    | 216    | 220    | 177    | 44     | 46     | 59     | 35    | 18     | 43    | 26     | 218   | 277   | 228    | 235    | 179    | 200    | 226    | 25     | 53    | 56     | 31     | 53     | 23    | 27     | Nod2    |        |
| Nodal   | 9     | 20     | 18    | 2      | 16     | 4      | 7      | 1      | 2      | 7      | 4     | 4      | 5     | 2      | 13    | 21    | 3      | 14     | 15     | 8      | 2      | 0      | 3     | 2      | 3      | 1      | 2     | 4      | Nodal   |        |
| Nog     | 366   | 305    | 326   | 375    | 403    | 369    | 344    | 484    | 433    | 631    | 591   | 635    | 431   | 639    | 310   | 232   | 394    | 331    | 394    | 386    | 354    | 465    | 432   | 625    | 482    | 659    | 485   | 533    | Nog     |        |
| Nol10   | 2982  | 2776   | 3526  | 2936   | 2639   | 2582   | 2875   |        |        |        |       |        |       |        |       |       |        |        |        |        |        |        |       |        |        |        |       |        |         |        |



|         |       |       |       |       |       |       |       |       |       |       |       |       |       |       |       |       |       |       |       |       |       |       |       |       |       |       |       |       |         |
|---------|-------|-------|-------|-------|-------|-------|-------|-------|-------|-------|-------|-------|-------|-------|-------|-------|-------|-------|-------|-------|-------|-------|-------|-------|-------|-------|-------|-------|---------|
| Nos3    | 338   | 405   | 449   | 385   | 443   | 379   | 298   | 482   | 704   | 864   | 778   | 841   | 974   | 681   | 361   | 447   | 385   | 370   | 392   | 325   | 388   | 795   | 768   | 874   | 860   | 1045  | 895   | 716   | Nos3    |
| Nosip   | 1345  | 1479  | 1394  | 1296  | 1440  | 1401  | 1199  | 1994  | 2329  | 2254  | 2182  | 2382  | 2080  | 2037  | 1290  | 1299  | 1413  | 1294  | 1516  | 1471  | 1321  | 1866  | 2295  | 2315  | 2276  | 2600  | 2221  | 2224  | Nosip   |
| Nostrin | 118   | 83    | 82    | 70    | 83    | 90    | 96    | 64    | 59    | 74    | 55    | 58    | 53    | 77    | 115   | 77    | 105   | 81    | 90    | 105   | 88    | 60    | 74    | 56    | 57    | 53    | 59    | 51    | Nostrin |
| Notch1  | 8010  | 12653 | 13790 | 12973 | 10735 | 10270 | 9162  | 8983  | 10631 | 12550 | 10057 | 19348 | 13347 | 16117 | 8596  | 10608 | 15433 | 12309 | 12757 | 8637  | 9902  | 11617 | 9207  | 15656 | 13163 | 12547 | 15297 | 15618 | Notch1  |
| Notch2  | 10947 | 10020 | 8623  | 10411 | 9130  | 10244 | 10169 | 7820  | 10931 | 11131 | 11674 | 10786 | 11118 | 10191 | 9034  | 11083 | 9062  | 11624 | 8937  | 8514  | 9738  | 9307  | 10910 | 10561 | 9189  | 8614  | 9434  | 9254  | Notch2  |
| Notch3  | 4511  | 5708  | 6855  | 5164  | 4489  | 4628  | 3365  | 6974  | 8178  | 8725  | 8895  | 12658 | 11991 | 10252 | 4269  | 5789  | 6256  | 5050  | 5047  | 3379  | 3643  | 8280  | 7917  | 10493 | 8059  | 10693 | 12196 | 11515 | Notch3  |
| Notch4  | 287   | 358   | 459   | 348   | 508   | 381   | 344   | 773   | 892   | 1245  | 1121  | 1271  | 1208  | 1227  | 351   | 318   | 445   | 380   | 428   | 308   | 351   | 1158  | 931   | 1245  | 1122  | 1314  | 1278  | 1163  | Notch4  |
| Noto    | 0     | 0     | 0     | 0     | 0     | 0     | 2     | 0     | 0     | 0     | 0     | 0     | 0     | 0     | 0     | 0     | 0     | 0     | 2     | 0     | 1     | 0     | 0     | 0     | 0     | 0     | 0     | 0     | Noto    |
| Notum   | 95    | 96    | 95    | 77    | 84    | 73    | 61    | 112   | 135   | 96    | 189   | 61    | 70    | 46    | 86    | 119   | 133   | 81    | 85    | 68    | 51    | 53    | 150   | 80    | 91    | 80    | 56    | 58    | Notum   |
| Nova1   | 4451  | 4162  | 5329  | 7385  | 10353 | 8846  | 8472  | 16212 | 11543 | 14401 | 12302 | 12277 | 13058 | 13201 | 5975  | 4091  | 6238  | 7383  | 8969  | 8563  | 9492  | 19682 | 10895 | 11802 | 15432 | 8461  | 13457 | 13200 | Nova1   |
| Nova2   | 5072  | 7229  | 11202 | 12925 | 12047 | 9857  | 10105 | 6567  | 6818  | 11014 | 8032  | 12611 | 9197  | 11359 | 6074  | 5640  | 12683 | 12049 | 12699 | 7941  | 12094 | 12841 | 6093  | 12079 | 13201 | 12053 | 9668  | 11818 | Nova2   |
| Nox1    | 16    | 10    | 8     | 12    | 10    | 9     | 13    | 6     | 2     | 3     | 0     | 2     | 3     | 0     | 12    | 6     | 9     | 4     | 23    | 2     | 8     | 0     | 1     | 1     | 0     | 8     | 8     | 0     | Nox1    |
| Nox3    | 2     | 5     | 0     | 0     | 0     | 0     | 0     | 1     | 49    | 8     | 8     | 2     | 14    | 0     | 1     | 0     | 0     | 0     | 16    | 0     | 2     | 22    | 11    | 7     | 19    | 0     | 0     | 1     | Nox3    |
| Nox4    | 239   | 154   | 177   | 166   | 178   | 203   | 134   | 499   | 554   | 445   | 454   | 529   | 603   | 445   | 240   | 238   | 163   | 141   | 140   | 156   | 142   | 466   | 563   | 401   | 441   | 455   | 493   | 478   | Nox4    |
| Noxa1   | 10    | 10    | 7     | 2     | 11    | 7     | 7     | 5     | 13    | 16    | 8     | 1     | 7     | 1     | 4     | 13    | 0     | 1     | 4     | 4     | 2     | 2     | 6     | 17    | 2     | 8     | 6     | 0     | Noxa1   |
| Noxo1   | 175   | 181   | 247   | 258   | 259   | 253   | 206   | 276   | 316   | 304   | 278   | 249   | 337   | 258   | 210   | 210   | 247   | 245   | 250   | 232   | 252   | 326   | 275   | 312   | 309   | 340   | 257   | 275   | Noxo1   |
| Noxred1 | 360   | 427   | 272   | 401   | 353   | 384   | 359   | 238   | 195   | 210   | 202   | 201   | 177   | 195   | 334   | 430   | 313   | 406   | 369   | 389   | 426   | 302   | 197   | 196   | 224   | 128   | 229   | 165   | Noxred1 |
| Npas1   | 171   | 226   | 208   | 402   | 335   | 342   | 377   | 53    | 95    | 136   | 64    | 88    | 33    | 79    | 179   | 191   | 351   | 460   | 378   | 308   | 343   | 122   | 74    | 118   | 152   | 87    | 40    | 63    | Npas1   |
| Npas2   | 32    | 13    | 5     | 30    | 34    | 36    | 34    | 74    | 63    | 82    | 101   | 21    | 17    | 27    | 13    | 16    | 9     | 23    | 25    | 24    | 25    | 57    | 96    | 112   | 31    | 89    | 8     | 19    | Npas2   |
| Npas3   | 2028  | 2046  | 3141  | 3479  | 3378  | 3363  | 3434  | 2458  | 2090  | 2636  | 2406  | 3091  | 2699  | 3175  | 2368  | 1940  | 3335  | 3368  | 3416  | 2675  | 3238  | 3751  | 2047  | 2944  | 3418  | 2917  | 2811  | 3459  | Npas3   |
| Npas4   | 113   | 153   | 234   | 232   | 309   | 192   | 239   | 188   | 180   | 258   | 227   | 229   | 164   | 264   | 117   | 118   | 234   | 241   | 239   | 154   | 251   | 389   | 158   | 283   | 315   | 195   | 192   | 165   | Npas4   |
| Npat    | 8394  | 7054  | 5149  | 6147  | 5241  | 6515  | 6423  | 5062  | 4372  | 3628  | 4104  | 4583  | 4469  | 4323  | 7854  | 7636  | 5543  | 5989  | 5248  | 6859  | 6122  | 3638  | 4336  | 3666  | 3792  | 3881  | 4659  | 4441  | Npat    |
| Npb     | 15    | 22    | 13    | 34    | 20    | 16    | 17    | 10    | 12    | 11    | 9     | 23    | 16    | 14    | 8     | 15    | 10    | 10    | 8     | 17    | 8     | 12    | 15    | 14    | 7     | 8     | 12    | 26    | Npb     |
| Npbwr1  | 9     | 14    | 8     | 19    | 38    | 17    | 21    | 2     | 16    | 8     | 3     | 2     | 12    | 9     | 26    | 6     | 7     | 10    | 18    | 21    | 31    | 27    | 23    | 2     | 9     | 1     | 3     | 6     | Npbwr1  |
| Npc1    | 5974  | 6350  | 6176  | 6970  | 7103  | 7064  | 6496  | 3403  | 3611  | 4144  | 4077  | 3629  | 4187  | 3454  | 5811  | 6343  | 6452  | 6994  | 7097  | 5674  | 7047  | 4361  | 3639  | 3482  | 3956  | 3065  | 3485  | 3513  | Npc1    |
| Npc11   | 42    | 55    | 42    | 75    | 65    | 57    | 76    | 5     | 12    | 9     | 11    | 20    | 7     | 5     | 40    | 32    | 79    | 84    | 42    | 28    | 51    | 12    | 12    | 21    | 20    | 1     | 12    | 9     | Npc11   |
| Npc2    | 12696 | 13686 | 14144 | 12366 | 11305 | 12447 | 11451 | 9699  | 9905  | 9394  | 9622  | 10873 | 10990 | 10646 | 12753 | 12930 | 13364 | 12425 | 12275 | 12607 | 11496 | 8627  | 10392 | 10447 | 10158 | 12211 | 12167 | 11776 | Npc2    |
| Npcd1   | 4202  | 6308  | 5506  | 7778  | 9431  | 8054  | 7936  | 6837  | 7524  | 8833  | 7145  | 8214  | 7176  | 7562  | 4770  | 4751  | 7204  | 8111  | 9909  | 7496  | 8342  | 9618  | 7083  | 9063  | 9997  | 7075  | 7017  | 6896  | Npcd1   |
| Npep1   | 1141  | 1382  | 1258  | 1077  | 1242  | 1213  | 924   | 1870  | 2292  | 1945  | 2372  | 2259  | 2163  | 1966  | 1068  | 1274  | 1170  | 1010  | 1084  | 862   | 1045  | 1688  | 2190  | 2051  | 1909  | 2643  | 2407  | 2095  | Npep1   |
| Npepps  | 15282 | 14098 | 18969 | 19517 | 20684 | 18561 | 21101 | 15736 | 14959 | 18103 | 16240 | 18394 | 15854 | 18488 | 15141 | 13841 | 20163 | 19908 | 21766 | 15622 | 21156 | 20307 | 14457 | 18941 | 19611 | 17417 | 16080 | 19039 | Npepps  |
| Npff    | 107   | 128   | 160   | 175   | 138   | 112   | 145   | 85    | 93    | 101   | 166   | 131   | 127   | 134   | 99    | 125   | 155   | 158   | 132   | 120   | 179   | 190   | 114   | 145   | 127   | 170   | 113   | 147   | Npff    |
| Npffr1  | 33    | 31    | 33    | 21    | 49    | 36    | 39    | 51    | 36    | 42    | 29    | 48    | 24    | 19    | 30    | 31    | 23    | 33    | 52    | 51    | 49    | 57    | 39    | 22    | 57    | 41    | 34    | 28    | Npffr1  |
| Npffr2  | 16    | 14    | 5     | 7     | 7     | 8     | 9     | 5     | 12    | 6     | 1     | 2     | 15    | 5     | 12    | 15    | 16    | 7     | 7     | 18    | 5     | 12    | 10    | 1     | 0     | 3     | 2     | 2     | Npffr2  |
| Nphp1   | 2024  | 1972  | 2040  | 1484  | 1432  | 1516  | 1526  | 2318  | 2152  | 1999  | 1953  | 2462  | 2275  | 2620  | 2041  | 1802  | 1742  | 1369  | 1486  | 1766  | 1445  | 1840  | 2104  | 2147  | 1986  | 2724  | 2753  | 2782  | Nphp1   |
| Nphp3   | 2701  | 2869  | 2859  | 2592  | 2342  | 2488  | 2496  | 1126  | 1325  | 1259  | 1562  | 1493  | 1503  | 1421  | 2418  | 2921  | 2606  | 2595  | 2258  | 2139  | 2245  | 1073  | 1322  | 1213  | 1162  | 1246  | 1484  | 1399  | Nphp3   |
| Nphp4   | 1006  | 1426  | 1688  | 1657  | 1465  | 1269  | 1101  | 669   | 846   | 978   | 834   | 1222  | 1167  | 978   | 1054  | 1292  | 1663  | 1435  | 1444  | 1069  | 1214  | 1024  | 790   | 994   | 993   | 990   | 1005  | 994   | Nphp4   |
| Npsh1   | 33    | 400   | 45    | 342   | 223   | 327   | 13    | 248   | 331   | 331   | 255   | 49    | 1058  | 38    | 236   | 522   | 346   | 162   | 107   | 233   | 38    | 343   | 307   | 47    | 279   | 41    | 26    | 55    | Npsh1   |
| Npsh2   | 8     | 6     | 5     | 27    | 13    | 17    | 12    | 17    | 14    | 15    | 14    | 26    | 42    | 13    | 24    | 17    | 12    | 9     | 6     | 8     | 12    | 23    | 17    | 25    | 27    | 23    | 23    | 32    | Npsh2   |
| Npl     | 1032  | 1183  | 1226  | 920   | 690   | 806   | 824   | 463   | 498   | 393   | 407   | 508   | 540   | 488   | 1296  | 1217  | 1045  | 891   | 813   | 1002  | 784   | 461   | 596   | 409   | 360   | 621   | 503   | 635   | Npl     |
| Nploc4  | 7304  | 7740  | 6851  | 7536  | 6689  | 6981  | 6786  | 5431  | 5689  | 6165  | 5412  | 7177  | 6273  | 6281  | 6980  | 6977  | 7132  | 7158  | 7251  | 5661  | 6677  | 5930  | 5526  | 6187  | 6179  | 6765  | 6313  | 6820  | Nploc4  |
| Npm1    | 69279 | 53165 | 73106 | 54169 | 43359 | 48261 | 55673 | 62457 | 55853 | 54774 | 56967 | 65482 | 62920 | 76469 | 67517 | 63963 | 62625 | 49974 | 49809 | 63618 | 50411 | 47046 | 58330 | 64031 | 53275 | 87768 | 73156 | 79150 | Npm1    |
| Npm2    | 242   | 208   | 191   | 196   | 169   | 233   | 192   | 117   | 97    | 164   | 145   | 124   | 134   | 133   | 175   | 202   | 192   | 229   | 228   | 197   | 221   | 149   | 82    | 119   | 94    | 146   | 129   | 155   | Npm2    |
| Npm3    | 2593  | 2802  | 2730  | 2253  | 1739  | 1784  | 2451  | 1691  | 1793  | 1765  | 1843  | 1702  | 1660  | 2253  | 2217  | 2192  | 2542  | 2300  | 2206  | 2059  | 2423  | 1263  | 1848  | 2237  | 1697  | 2614  | 1997  | 2403  | Npm3    |
| Npnt    | 3117  | 2909  | 2427  | 2130  | 2950  | 2591  | 1535  | 3667  | 4306  | 3576  | 4145  | 2860  | 3680  | 1506  | 2556  | 3925  | 2042  | 2451  | 2381  | 2549  | 2214  | 3796  | 5981  | 2323  | 2661  | 1526  | 1686  | 1520  | Npnt    |
| Nppa    | 2     | 2     | 2     | 12    | 2     | 4     | 10    | 12    | 11    | 18    | 21    | 5     | 6     | 31    | 1     | 4     | 3     | 9     | 8     | 16    | 17    | 16    | 18    | 30    | 8     | 27    | 14    | Nppa  |         |
| Nppb    | 5     | 0     | 0     | 1     | 0     | 0     | 2     | 5     | 3     | 3     | 5     | 1     | 0     | 3     | 5     | 5     | 1     | 0     | 1     | 0     | 0     | 2     | 3     | 0     | 5     | 3     | 1     | 1     | Nppb    |
| Nppc    | 28    | 37    | 27    | 39    | 70    | 32    | 37    | 43    | 49    | 71    | 84    | 14    | 33    | 14    | 40    | 21    | 37    | 25    | 25    | 35    | 33    | 40    | 107   | 34    | 42    | 26    | 10    | 13    | Nppc    |
| Npr1    | 466   | 595   | 736   | 536   | 676   | 620   | 406   | 291   | 410   | 460   | 689   | 384   | 429   | 388   | 529   | 620   | 691   | 548   | 504   | 406   | 411   | 515   | 617   | 400   | 469   | 445   | 504   | 341   | Npr1    |
| Npr2    | 2060  | 2485  | 2310  | 1949  | 2567  | 2111  | 1752  | 3467  | 3892  | 4032  | 4366  | 3442  | 4473  | 3251  | 2210  | 3026  | 2432  | 2122  | 2155  | 1743  | 1728  | 4451  | 3677  | 3581  | 3933  | 3150  | 3426  | 3534  | Npr2    |
| Npr3    | 1158  | 864   | 1251  | 553   | 841   | 945   | 459   | 2005  | 2322  | 1594  | 2309  | 1702  | 2437  | 1392  | 1357  | 1341  | 848   | 741   | 595   | 673   | 543   | 1567  | 3051  | 1442  | 1176  | 1340  | 1536  | 1540  | Npr3    |
| Nprl2   | 2748  | 3841  | 2703  | 3416  | 2673  | 256   |       |       |       |       |       |       |       |       |       |       |       |       |       |       |       |       |       |       |       |       |       |       |         |

|         |       |       |       |       |       |       |       |       |       |       |       |       |       |       |       |       |       |       |       |       |       |       |       |       |       |       |       |       |         |       |
|---------|-------|-------|-------|-------|-------|-------|-------|-------|-------|-------|-------|-------|-------|-------|-------|-------|-------|-------|-------|-------|-------|-------|-------|-------|-------|-------|-------|-------|---------|-------|
| Nr2c2   | 9274  | 8396  | 7095  | 9639  | 12070 | 11747 | 12178 | 14741 | 13463 | 13594 | 13635 | 14205 | 12528 | 14389 | 9315  | 7330  | 8696  | 9838  | 11671 | 10320 | 12237 | 14546 | 12550 | 13078 | 15964 | 10150 | 13726 | 13410 | Nr2c2   |       |
| Nr2c2ap | 1277  | 1733  | 1452  | 1735  | 1420  | 1478  | 1466  | 821   | 797   | 783   | 750   | 904   | 796   | 764   | 1244  | 1378  | 1564  | 1720  | 1668  | 1609  | 1587  | 705   | 830   | 874   | 886   | 1073  | 827   | 878   | Nr2c2ap |       |
| Nr2e1   | 3746  | 3771  | 4738  | 4035  | 3467  | 3663  | 5140  | 3378  | 3307  | 3479  | 2460  | 7059  | 3191  | 6916  | 3268  | 1787  | 4811  | 3491  | 4770  | 4278  | 4590  | 2562  | 2144  | 5771  | 4734  | 8865  | 5605  | 6772  | Nr2e1   |       |
| Nr2e3   | 8     | 3     | 0     | 3     | 0     | 8     | 0     | 17    | 40    | 19    | 15    | 12    | 27    | 6     | 13    | 5     | 0     | 6     | 3     | 0     | 1     | 0     | 38    | 18    | 13    | 10    | 7     | 4     | Nr2e3   |       |
| Nr2f1   | 8116  | 8954  | 13294 | 11736 | 12257 | 11095 | 13330 | 16185 | 14093 | 18246 | 14708 | 23292 | 16755 | 25014 | 9792  | 7400  | 13243 | 10161 | 13023 | 11433 | 12499 | 20927 | 15359 | 21234 | 20377 | 25751 | 20983 | 25249 | Nr2f1   |       |
| Nr2f2   | 7510  | 6981  | 15170 | 12564 | 12791 | 10844 | 14591 | 13115 | 10870 | 14331 | 13716 | 16887 | 13304 | 19295 | 9268  | 7708  | 13997 | 11704 | 11873 | 10395 | 12607 | 20110 | 12220 | 17155 | 16898 | 22477 | 15171 | 20766 | Nr2f2   |       |
| Nr2f6   | 2599  | 3048  | 3208  | 2396  | 2162  | 1890  | 1741  | 1715  | 1682  | 1707  | 1759  | 1775  | 1878  | 1520  | 2349  | 2796  | 2855  | 2248  | 2308  | 1972  | 1847  | 1556  | 1874  | 1799  | 1340  | 2038  | 1880  | 1766  | Nr2f6   |       |
| Nr3c1   | 2141  | 1617  | 1591  | 1354  | 1502  | 1654  | 1530  | 2429  | 2701  | 2008  | 3012  | 1509  | 1856  | 1677  | 1795  | 1878  | 1518  | 1615  | 1160  | 1549  | 1516  | 1850  | 3243  | 1813  | 1611  | 1238  | 1472  | 1549  | Nr3c1   |       |
| Nr3c2   | 341   | 379   | 340   | 352   | 425   | 301   | 302   | 189   | 237   | 161   | 315   | 98    | 109   | 87    | 368   | 374   | 313   | 381   | 287   | 301   | 324   | 212   | 337   | 147   | 170   | 58    | 101   | 91    | Nr3c2   |       |
| Nr4a1   | 411   | 479   | 447   | 471   | 392   | 306   | 334   | 347   | 493   | 440   | 577   | 404   | 415   | 348   | 325   | 489   | 443   | 408   | 388   | 325   | 333   | 389   | 532   | 458   | 380   | 387   | 392   | 318   | Nr4a1   |       |
| Nr4a2   | 2090  | 2494  | 3483  | 4148  | 3218  | 2974  | 4041  | 2097  | 1915  | 2514  | 1966  | 2813  | 2829  | 2546  | 1973  | 2459  | 3851  | 3978  | 3750  | 3219  | 3572  | 3187  | 1821  | 2701  | 2895  | 2414  | 2339  | 2790  | Nr4a2   |       |
| Nr4a3   | 611   | 739   | 812   | 1012  | 1060  | 984   | 1003  | 630   | 620   | 794   | 625   | 378   | 667   | 368   | 754   | 776   | 909   | 1215  | 1043  | 784   | 1186  | 919   | 641   | 498   | 925   | 280   | 375   | 370   | Nr4a3   |       |
| Nr5a1   | 55    | 51    | 35    | 56    | 54    | 37    | 51    | 123   | 105   | 126   | 75    | 74    | 9     | 64    | 40    | 35    | 64    | 51    | 41    | 46    | 62    | 167   | 144   | 149   | 158   | 152   | 37    | 25    | Nr5a1   |       |
| Nr5a2   | 187   | 139   | 187   | 175   | 290   | 237   | 263   | 429   | 287   | 333   | 612   | 302   | 259   | 300   | 193   | 182   | 207   | 262   | 327   | 188   | 325   | 456   | 326   | 411   | 408   | 171   | 351   | 360   | Nr5a2   |       |
| Nr6a1   | 3417  | 3323  | 2611  | 2732  | 2720  | 2725  | 2985  | 909   | 736   | 860   | 787   | 693   | 810   | 751   | 3556  | 3290  | 2547  | 2710  | 2291  | 2579  | 2834  | 842   | 806   | 689   | 676   | 552   | 793   | 765   | Nr6a1   |       |
| Nradd   | 631   | 721   | 857   | 616   | 569   | 608   | 515   | 933   | 1071  | 880   | 864   | 959   | 1124  | 894   | 612   | 643   | 745   | 594   | 727   | 700   | 587   | 744   | 1072  | 990   | 826   | 1137  | 1130  | 1046  | Nradd   |       |
| Nrap    | 50    | 75    | 48    | 73    | 85    | 92    | 73    | 77    | 87    | 46    | 295   | 79    | 73    | 69    | 70    | 72    | 46    | 76    | 47    | 75    | 58    | 105   | 199   | 85    | 98    | 72    | 67    | 71    | Nrap    |       |
| Nrarp   | 3002  | 3972  | 4414  | 3608  | 2949  | 3079  | 3195  | 4145  | 3460  | 3936  | 3023  | 5549  | 4951  | 6237  | 3620  | 3140  | 4385  | 3078  | 3455  | 3139  | 3390  | 3659  | 3374  | 5103  | 4169  | 6244  | 6047  | 6843  | Nrarp   |       |
| Nras    | 15045 | 13094 | 13937 | 12702 | 11968 | 12834 | 13527 | 19867 | 16628 | 15987 | 15701 | 19578 | 18758 | 20089 | 14666 | 13164 | 13005 | 11798 | 12742 | 13273 | 12977 | 17306 | 16241 | 17562 | 17792 | 19930 | 20583 | 21010 | Nras    |       |
| Nrbf2   | 0     | 0     | 0     | 0     | 0     | 0     | 0     | 0     | 0     | 0     | 0     | 0     | 0     | 0     | 0     | 0     | 0     | 0     | 0     | 1     | 0     | 0     | 0     | 0     | 0     | 0     | 0     | 0     | 0       | Nrbf2 |
| Nrbp1   | 6305  | 6715  | 6415  | 6825  | 6320  | 6687  | 6312  | 8330  | 7969  | 7580  | 7460  | 7707  | 7530  | 7697  | 6279  | 5812  | 6603  | 6268  | 6860  | 6837  | 6621  | 8136  | 8279  | 7531  | 7856  | 8048  | 7937  | 8332  | Nrbp1   |       |
| Nrbp2   | 4106  | 5454  | 5807  | 5873  | 7040  | 6171  | 5266  | 4914  | 5008  | 5928  | 5404  | 4566  | 5824  | 4478  | 5093  | 5604  | 6122  | 5948  | 6060  | 5176  | 5635  | 7431  | 5000  | 4830  | 5857  | 3245  | 4501  | 4342  | Nrbp2   |       |
| Nrcam   | 9067  | 10713 | 5575  | 9330  | 12936 | 13212 | 12785 | 17363 | 14228 | 12758 | 11113 | 11313 | 11110 | 12472 | 12008 | 8526  | 8020  | 9434  | 10953 | 15072 | 14091 | 13849 | 13573 | 9702  | 14331 | 5983  | 12666 | 10763 | Nrcam   |       |
| Nrd1    | 25077 | 23211 | 21709 | 23190 | 21972 | 22936 | 25530 | 20314 | 18475 | 18995 | 18248 | 20309 | 19224 | 21120 | 24684 | 22831 | 21398 | 22958 | 21722 | 22126 | 25128 | 19392 | 18109 | 18519 | 19968 | 18077 | 20737 | 20507 | Nrd1    |       |
| Nrde2   | 561   | 454   | 449   | 455   | 576   | 523   | 514   | 2058  | 2078  | 2065  | 2055  | 2288  | 2074  | 2272  | 513   | 414   | 528   | 408   | 613   | 545   | 531   | 1771  | 2013  | 2018  | 2295  | 1996  | 2128  | 2073  | Nrde2   |       |
| Nrep    | 44494 | 38932 | 43343 | 52195 | 62623 | 58005 | 65748 | 77396 | 67518 | 68888 | 68754 | 64019 | 66395 | 72771 | 53920 | 43370 | 47482 | 54542 | 56961 | 64489 | 63569 | 77605 | 71323 | 71179 | 78487 | 64936 | 62742 | 65348 | Nrep    |       |
| Nrf1    | 3746  | 3966  | 4247  | 4349  | 4010  | 4143  | 3961  | 4224  | 4322  | 4484  | 4172  | 5432  | 4923  | 5212  | 3460  | 3464  | 4149  | 3875  | 4571  | 3866  | 4147  | 4079  | 4029  | 5006  | 5052  | 6072  | 5605  | 5457  | Nrf1    |       |
| Nrg1    | 1694  | 1492  | 1065  | 1695  | 2275  | 2133  | 2376  | 2107  | 2013  | 1862  | 1761  | 1728  | 1456  | 1872  | 1916  | 1551  | 1469  | 1596  | 1975  | 2019  | 2352  | 1696  | 1547  | 1535  | 1838  | 1489  | 1575  | 1358  | Nrg1    |       |
| Nrg2    | 128   | 161   | 156   | 220   | 327   | 222   | 197   | 112   | 124   | 148   | 140   | 93    | 124   | 99    | 137   | 160   | 172   | 198   | 298   | 214   | 241   | 177   | 156   | 159   | 165   | 62    | 114   | 84    | Nrg2    |       |
| Nrg3    | 314   | 347   | 248   | 581   | 1001  | 772   | 821   | 659   | 644   | 803   | 661   | 513   | 502   | 458   | 402   | 349   | 437   | 770   | 789   | 691   | 918   | 947   | 632   | 554   | 895   | 253   | 366   | 379   | Nrg3    |       |
| Nrg4    | 38    | 32    | 5     | 20    | 24    | 15    | 10    | 7     | 27    | 10    | 11    | 11    | 12    | 11    | 22    | 33    | 19    | 32    | 9     | 32    | 19    | 17    | 17    | 9     | 6     | 17    | 9     | 7     | Nrg4    |       |
| Nrgn    | 305   | 488   | 420   | 502   | 502   | 479   | 336   | 247   | 235   | 314   | 299   | 139   | 332   | 128   | 367   | 415   | 470   | 471   | 351   | 344   | 292   | 244   | 261   | 169   | 226   | 134   | 132   | 131   | Nrgn    |       |
| Nrip1   | 3068  | 2238  | 2357  | 2852  | 3390  | 3468  | 3120  | 3323  | 3189  | 3265  | 3737  | 3118  | 2994  | 3353  | 2762  | 2697  | 2509  | 2724  | 3012  | 2657  | 3294  | 3342  | 3121  | 3197  | 2603  | 3045  | 2807  | 2807  | Nrip1   |       |
| Nrip2   | 20    | 37    | 15    | 42    | 70    | 54    | 54    | 117   | 144   | 130   | 139   | 92    | 92    | 106   | 49    | 38    | 29    | 34    | 53    | 69    | 80    | 170   | 143   | 96    | 132   | 99    | 100   | 82    | Nrip2   |       |
| Nrip3   | 1411  | 1507  | 1258  | 1741  | 1843  | 1732  | 2275  | 320   | 299   | 272   | 337   | 200   | 153   | 269   | 1741  | 1354  | 1369  | 1933  | 1661  | 1928  | 2129  | 274   | 311   | 273   | 285   | 192   | 173   | 165   | Nrip3   |       |
| Nrk     | 2384  | 1384  | 1098  | 992   | 637   | 1454  | 546   | 1925  | 3703  | 2289  | 10898 | 1614  | 2339  | 1612  | 1996  | 2663  | 852   | 1595  | 598   | 566   | 564   | 2249  | 7440  | 1865  | 1689  | 1274  | 1245  | 1374  | Nrk     |       |
| Nrl     | 14    | 21    | 10    | 20    | 20    | 4     | 26    | 15    | 12    | 8     | 11    | 23    | 18    | 12    | 26    | 18    | 10    | 18    | 20    | 17    | 28    | 10    | 14    | 8     | 8     | 11    | 1     | 17    | Nrl     |       |
| Nrm     | 1377  | 1557  | 1580  | 1376  | 1159  | 1200  | 1519  | 1051  | 1232  | 1156  | 1199  | 1809  | 1690  | 1788  | 1369  | 1289  | 1658  | 1367  | 1316  | 1338  | 1254  | 1089  | 1179  | 1527  | 1234  | 2205  | 1816  | 1836  | Nrm     |       |
| Nrn1    | 1078  | 1139  | 1798  | 1681  | 2734  | 2158  | 2733  | 3850  | 2809  | 3420  | 2881  | 3999  | 3656  | 5047  | 1493  | 980   | 1978  | 1788  | 2684  | 2619  | 2684  | 3678  | 2919  | 4094  | 4354  | 3213  | 4349  | 5045  | Nrn1    |       |
| Nrn1l   | 0     | 3     | 0     | 1     | 0     | 0     | 0     | 0     | 0     | 0     | 0     | 0     | 0     | 0     | 0     | 0     | 0     | 0     | 0     | 0     | 0     | 0     | 0     | 0     | 0     | 0     | 0     | 0     | 0       | Nrn1l |
| Nrp1    | 2220  | 2233  | 1457  | 1694  | 3296  | 2493  | 2081  | 4799  | 5769  | 4551  | 6078  | 3221  | 3631  | 2959  | 2490  | 2359  | 1635  | 2316  | 2272  | 2551  | 2298  | 5071  | 5922  | 3533  | 4518  | 2175  | 3054  | 2659  | Nrp1    |       |
| Nrp2    | 11129 | 11326 | 10774 | 12451 | 13345 | 12609 | 11763 | 11611 | 14283 | 16343 | 16147 | 13636 | 13840 | 13448 | 11701 | 13926 | 11556 | 13705 | 11513 | 10501 | 11324 | 16681 | 13138 | 15379 | 15399 | 12003 | 11846 | 12056 | Nrp2    |       |
| Nrras   | 318   | 251   | 217   | 189   | 277   | 233   | 187   | 353   | 465   | 405   | 399   | 339   | 417   | 282   | 272   | 273   | 258   | 252   | 261   | 247   | 221   | 341   | 552   | 400   | 361   | 416   | 403   | 363   | Nrras   |       |
| Nrsn1   | 1001  | 1104  | 835   | 1557  | 2410  | 1696  | 2029  | 1037  | 1001  | 1275  | 1127  | 817   | 716   | 819   | 1295  | 1021  | 1161  | 1869  | 1898  | 1792  | 2127  | 1686  | 1033  | 1022  | 1231  | 692   | 795   | 856   | Nrsn1   |       |
| Nrsn2   | 428   | 460   | 484   | 761   | 981   | 679   | 744   | 482   | 528   | 726   | 616   | 618   | 481   | 675   | 493   | 507   | 753   | 763   | 842   | 664   | 819   | 792   | 457   | 600   | 800   | 475   | 500   | 596   | Nrsn2   |       |
| Nrtn    | 333   | 347   | 271   | 276   | 151   | 176   | 152   | 88    | 91    | 80    | 67    | 62    | 86    | 42    | 264   | 256   | 270   | 260   | 224   | 186   | 142   | 43    | 81    | 56    | 47    | 56    | 83    | 55    | Nrtn    |       |
| Nrxn1   | 3541  | 3728  | 3611  | 7199  | 10597 | 9192  | 9184  | 8024  | 7196  | 9097  | 7895  | 6003  | 5964  | 6704  | 4958  | 3883  | 5435  | 7663  | 8312  | 7985  | 9548  | 11802 | 7682  | 6933  | 10347 | 4059  | 5493  | 5190  | Nrxn1   |       |
| Nrxn2   | 0     | 1     | 0     | 0     | 1     | 0     | 1     | 0     | 0     | 0     | 0     | 0     | 0     | 0     | 0     | 0     | 0     | 0     | 0     | 0     | 0     | 0     | 0     | 0     | 0     | 0     | 2     | 0     | Nrxn2   |       |
| Nrxn3   | 2869  | 3308  | 2880  | 621   |       |       |       |       |       |       |       |       |       |       |       |       |       |       |       |       |       |       |       |       |       |       |       |       |         |       |

|          |       |       |       |       |       |       |       |       |       |       |       |       |       |       |       |       |       |       |       |       |       |       |       |       |       |       |       |       |          |
|----------|-------|-------|-------|-------|-------|-------|-------|-------|-------|-------|-------|-------|-------|-------|-------|-------|-------|-------|-------|-------|-------|-------|-------|-------|-------|-------|-------|-------|----------|
| Nt5dc1   | 463   | 282   | 416   | 302   | 281   | 299   | 294   | 396   | 441   | 306   | 421   | 405   | 485   | 444   | 456   | 356   | 248   | 277   | 281   | 345   | 239   | 286   | 443   | 381   | 310   | 515   | 487   | 441   | Nt5dc1   |
| Nt5dc2   | 14132 | 18484 | 16458 | 14560 | 12007 | 12666 | 11999 | 8512  | 9769  | 9263  | 9019  | 11715 | 11460 | 10673 | 13291 | 15850 | 16157 | 13419 | 13757 | 12121 | 12207 | 8017  | 9849  | 10643 | 9561  | 13263 | 12126 | 11966 | Nt5dc2   |
| Nt5dc3   | 3270  | 3672  | 3399  | 5820  | 6667  | 5747  | 5730  | 2325  | 2492  | 2963  | 2694  | 1490  | 1714  | 1480  | 3460  | 3400  | 4216  | 6203  | 6351  | 5452  | 6207  | 3307  | 2407  | 2174  | 3094  | 1342  | 1383  | 1252  | Nt5dc3   |
| Nt5e     | 236   | 155   | 197   | 94    | 97    | 237   | 63    | 175   | 372   | 166   | 373   | 133   | 215   | 150   | 244   | 248   | 111   | 223   | 115   | 83    | 78    | 107   | 370   | 185   | 125   | 89    | 127   | 117   | Nt5e     |
| Nt5el    | 1     | 1     | 0     | 0     | 2     | 3     | 0     | 0     | 0     | 0     | 0     | 0     | 0     | 2     | 1     | 2     | 1     | 1     | 0     | 1     | 2     | 2     | 0     | 0     | 0     | 0     | 0     | 0     | Nt5el    |
| Nt5m     | 495   | 658   | 658   | 549   | 737   | 689   | 615   | 1109  | 1221  | 1354  | 1340  | 1284  | 1191  | 1223  | 550   | 497   | 656   | 598   | 804   | 633   | 670   | 1340  | 1141  | 1314  | 1433  | 1292  | 1246  | 1296  | Nt5m     |
| Ntan1    | 3120  | 2782  | 2662  | 2539  | 2952  | 2789  | 3414  | 4085  | 3728  | 3738  | 3435  | 3542  | 3319  | 4010  | 3223  | 2572  | 2897  | 2544  | 2866  | 3219  | 3224  | 3581  | 3625  | 3676  | 3769  | 4065  | 3581  | 3963  | Ntan1    |
| Ntf3     | 331   | 190   | 214   | 143   | 132   | 114   | 148   | 176   | 173   | 153   | 177   | 68    | 104   | 59    | 233   | 239   | 197   | 155   | 149   | 147   | 129   | 67    | 178   | 144   | 39    | 186   | 62    | 81    | Ntf3     |
| Ntf5     | 68    | 26    | 42    | 37    | 17    | 19    | 12    | 103   | 105   | 57    | 90    | 39    | 58    | 42    | 45    | 38    | 23    | 24    | 11    | 16    | 6     | 25    | 107   | 65    | 16    | 57    | 38    | 20    | Ntf5     |
| Nth1     | 401   | 428   | 637   | 419   | 434   | 337   | 365   | 496   | 551   | 540   | 574   | 617   | 621   | 541   | 345   | 447   | 451   | 403   | 406   | 371   | 332   | 446   | 579   | 647   | 543   | 828   | 621   | 656   | Nth1     |
| Ntm      | 2139  | 2388  | 1945  | 3867  | 6127  | 4540  | 4939  | 4664  | 4643  | 5400  | 5299  | 3274  | 3222  | 3490  | 3075  | 2203  | 3045  | 4747  | 4523  | 5166  | 5310  | 6378  | 5138  | 3958  | 5509  | 2675  | 2847  | 3084  | Ntm      |
| Ntmt1    | 3211  | 4391  | 3336  | 4279  | 3224  | 3234  | 3206  | 2082  | 2128  | 2262  | 2060  | 2494  | 2446  | 2230  | 3189  | 3573  | 3714  | 3826  | 3811  | 3630  | 3413  | 1912  | 2222  | 2356  | 2439  | 2632  | 2650  | 2435  | Ntmt1    |
| Ntn1     | 4863  | 7317  | 7604  | 6959  | 7969  | 7319  | 5322  | 6701  | 6983  | 7721  | 8179  | 6999  | 9191  | 6116  | 7232  | 6991  | 8781  | 7707  | 6903  | 5473  | 5910  | 8278  | 6625  | 6367  | 6944  | 5597  | 7066  | 6457  | Ntn1     |
| Ntn3     | 1166  | 1254  | 917   | 693   | 580   | 759   | 397   | 1017  | 1561  | 1162  | 1501  | 1222  | 1557  | 1050  | 938   | 1373  | 762   | 790   | 461   | 424   | 432   | 1218  | 1431  | 1183  | 1088  | 1312  | 1220  | 1105  | Ntn3     |
| Ntn4     | 642   | 746   | 1016  | 826   | 909   | 890   | 855   | 1377  | 1341  | 1384  | 1099  | 2104  | 1660  | 2098  | 748   | 502   | 984   | 723   | 995   | 697   | 938   | 1370  | 1042  | 1620  | 1723  | 2020  | 1951  | 1940  | Ntn4     |
| Ntn5     | 14    | 26    | 12    | 12    | 40    | 17    | 13    | 55    | 53    | 95    | 59    | 23    | 59    | 24    | 17    | 24    | 37    | 42    | 11    | 10    | 12    | 58    | 70    | 39    | 22    | 26    | 19    |       | Ntn5     |
| Ntnng1   | 571   | 520   | 577   | 815   | 1427  | 1054  | 1331  | 1258  | 1024  | 1752  | 1418  | 963   | 871   | 977   | 691   | 600   | 691   | 1063  | 1142  | 950   | 1239  | 2196  | 1213  | 1416  | 1689  | 612   | 837   | 792   | Ntnng1   |
| Ntnng2   | 762   | 853   | 1169  | 1395  | 1906  | 1619  | 1796  | 1213  | 1440  | 1852  | 1436  | 2011  | 1164  | 1852  | 754   | 776   | 1502  | 1512  | 2141  | 1389  | 1908  | 2172  | 1351  | 2155  | 2649  | 1131  | 1685  | 1625  | Ntnng2   |
| Ntpr     | 731   | 800   | 615   | 651   | 619   | 644   | 601   | 615   | 690   | 700   | 656   | 595   | 575   | 558   | 611   | 665   | 734   | 666   | 561   | 608   | 576   | 503   | 695   | 574   | 542   | 655   | 580   | 565   | Ntpr     |
| Ntrk1    | 466   | 764   | 160   | 166   | 1550  | 157   | 55    | 1288  | 1572  | 1086  | 2010  | 99    | 1516  | 88    | 827   | 1283  | 433   | 955   | 111   | 130   | 69    | 2381  | 890   | 85    | 1185  | 59    | 131   | 97    | Ntrk1    |
| Ntrk2    | 3797  | 4455  | 4439  | 5755  | 9399  | 7433  | 7548  | 7566  | 7939  | 8885  | 9169  | 7314  | 7201  | 7009  | 5025  | 4005  | 5561  | 7023  | 7540  | 6444  | 7378  | 10920 | 9042  | 7133  | 9492  | 4921  | 6194  | 6222  | Ntrk2    |
| Ntrk3    | 2987  | 2896  | 2062  | 4602  | 7055  | 6767  | 6683  | 7584  | 7735  | 7613  | 8018  | 5786  | 5576  | 6250  | 4013  | 3183  | 3362  | 5203  | 5483  | 6623  | 7892  | 8769  | 7148  | 6504  | 9190  | 3757  | 5480  | 4719  | Ntrk3    |
| Nts      | 328   | 47    | 32    | 157   | 237   | 209   | 400   | 473   | 386   | 285   | 205   | 149   | 104   | 195   | 91    | 77    | 63    | 260   | 261   | 221   | 337   | 175   | 403   | 289   | 424   | 96    | 86    | 123   | Nts      |
| Ntsr1    | 46    | 47    | 46    | 104   | 199   | 140   | 160   | 150   | 199   | 196   | 202   | 134   | 44    | 107   | 44    | 25    | 54    | 111   | 199   | 143   | 187   | 216   | 190   | 171   | 250   | 92    | 69    | 76    | Ntsr1    |
| Ntsr2    | 6     | 12    | 6     | 13    | 65    | 25    | 34    | 26    | 30    | 36    | 21    | 12    | 17    | 22    | 10    | 3     | 28    | 28    | 26    | 47    | 23    | 17    | 26    | 17    | 14    | 15    | 13    |       | Ntsr2    |
| Nuak1    | 4901  | 5793  | 6463  | 7419  | 7531  | 6990  | 6752  | 6024  | 6751  | 7316  | 6842  | 6668  | 6225  | 6646  | 5317  | 5094  | 6816  | 7516  | 7577  | 5985  | 7496  | 6600  | 5872  | 7228  | 9070  | 5990  | 5885  | 6227  | Nuak1    |
| Nuak2    | 3028  | 4377  | 4899  | 5032  | 3715  | 3972  | 3619  | 2215  | 1725  | 2145  | 1537  | 3747  | 2905  | 3593  | 3390  | 3222  | 4543  | 4409  | 4456  | 3475  | 3875  | 2428  | 1662  | 2638  | 2442  | 3248  | 4077  | 4239  | Nuak2    |
| Nub1     | 5338  | 5953  | 4955  | 5760  | 5690  | 5482  | 6051  | 4925  | 5182  | 5015  | 5064  | 5059  | 4613  | 5103  | 5461  | 5403  | 5385  | 6133  | 5690  | 5703  | 6134  | 5574  | 5223  | 5257  | 5726  | 4823  | 4682  | 4826  | Nub1     |
| Nubp1    | 1211  | 1225  | 1139  | 982   | 1137  | 1081  | 882   | 2027  | 2217  | 2075  | 2020  | 2603  | 2667  | 2475  | 1005  | 1050  | 1072  | 861   | 1093  | 982   | 882   | 2079  | 1956  | 2360  | 2163  | 2921  | 2658  | 2600  | Nubp1    |
| Nubp2    | 3477  | 4548  | 3443  | 3886  | 2682  | 2929  | 2982  | 1713  | 1823  | 1745  | 1616  | 1897  | 1917  | 1802  | 3364  | 3457  | 3189  | 3497  | 3406  | 3307  | 3062  | 1475  | 1798  | 1834  | 1879  | 2302  | 2193  | 2015  | Nubp2    |
| Nubpl    | 888   | 650   | 683   | 518   | 494   | 647   | 636   | 865   | 629   | 548   | 637   | 778   | 746   | 764   | 881   | 701   | 605   | 508   | 553   | 795   | 600   | 643   | 717   | 634   | 610   | 939   | 817   | 862   | Nubpl    |
| Nucb1    | 7035  | 8712  | 9140  | 8681  | 7192  | 7338  | 6014  | 4583  | 5645  | 5794  | 6714  | 5189  | 5389  | 4779  | 6737  | 8301  | 8502  | 8602  | 7552  | 5603  | 6700  | 5265  | 6554  | 5695  | 5121  | 5966  | 4818  | 5243  | Nucb1    |
| Nucb2    | 1874  | 1474  | 1712  | 1752  | 1954  | 2129  | 1852  | 1726  | 1476  | 1415  | 1687  | 1352  | 1407  | 1442  | 1925  | 1640  | 1781  | 1807  | 1643  | 2055  | 1855  | 1517  | 1601  | 1439  | 1437  | 1586  | 1324  | 1314  | Nucb2    |
| Nucks1   | 14867 | 10044 | 20033 | 13870 | 12566 | 12940 | 14182 | 18169 | 16140 | 17538 | 17698 | 23020 | 20781 | 23191 | 13924 | 12012 | 16523 | 12940 | 13263 | 12456 | 12994 | 17483 | 15502 | 21717 | 19199 | 32378 | 23699 | 26067 | Nucks1   |
| Nudc     | 8679  | 10388 | 12059 | 9736  | 8174  | 7721  | 8880  | 7063  | 7617  | 8758  | 8032  | 9873  | 9260  | 10548 | 8159  | 8638  | 10998 | 8844  | 9354  | 8740  | 8300  | 6714  | 7484  | 10069 | 8640  | 12729 | 10437 | 10977 | Nudc     |
| Nudcd1   | 5868  | 4672  | 5155  | 4817  | 4003  | 4570  | 5235  | 3990  | 3288  | 2775  | 2913  | 3649  | 3375  | 3898  | 5686  | 5085  | 4819  | 4616  | 4559  | 5406  | 4883  | 2989  | 3205  | 3251  | 3157  | 4004  | 3907  | 4090  | Nudcd1   |
| Nudcd2   | 4670  | 3753  | 5234  | 3951  | 3328  | 3719  | 4245  | 4158  | 3492  | 3251  | 3465  | 4607  | 4389  | 5029  | 4622  | 4213  | 4297  | 3628  | 3711  | 4505  | 3699  | 2872  | 3511  | 3991  | 3465  | 5863  | 5063  | 5435  | Nudcd2   |
| Nudcd3   | 7769  | 7855  | 6591  | 6776  | 7037  | 7565  | 6949  | 7819  | 7874  | 7704  | 7410  | 8210  | 7805  | 8078  | 7435  | 6947  | 6696  | 6947  | 7248  | 7184  | 7394  | 7758  | 7477  | 7757  | 8836  | 8397  | 8457  | 8053  | Nudcd3   |
| Nudt1    | 431   | 497   | 514   | 394   | 394   | 424   | 379   | 797   | 834   | 781   | 769   | 1001  | 1080  | 1038  | 404   | 399   | 504   | 402   | 454   | 404   | 341   | 668   | 928   | 938   | 733   | 1177  | 1151  | 1130  | Nudt1    |
| Nudt10   | 1392  | 1286  | 1517  | 1966  | 2208  | 1991  | 2199  | 2088  | 1631  | 1847  | 1588  | 1685  | 1529  | 1917  | 1557  | 1253  | 1666  | 1696  | 2040  | 1857  | 2103  | 2197  | 1550  | 1777  | 2081  | 1633  | 1417  | 1772  | Nudt10   |
| Nudt11   | 2986  | 2686  | 3091  | 3797  | 4139  | 3925  | 4383  | 3051  | 2429  | 2739  | 2301  | 2608  | 2222  | 2525  | 3257  | 2525  | 3518  | 3843  | 4171  | 4022  | 4226  | 3345  | 2355  | 2545  | 2955  | 2358  | 2295  | 2387  | Nudt11   |
| Nudt12   | 1205  | 1137  | 1293  | 986   | 1097  | 971   | 1044  | 703   | 699   | 722   | 683   | 780   | 743   | 750   | 1266  | 1139  | 1264  | 1095  | 1027  | 1142  | 977   | 658   | 661   | 634   | 604   | 781   | 906   | 748   | Nudt12   |
| Nudt13   | 955   | 964   | 1214  | 1098  | 1109  | 1040  | 1054  | 808   | 872   | 926   | 970   | 934   | 849   | 992   | 982   | 886   | 1059  | 1115  | 1016  | 1045  | 1025  | 830   | 970   | 949   | 895   | 959   | 960   | 884   | Nudt13   |
| Nudt14   | 586   | 672   | 669   | 615   | 576   | 549   | 515   | 679   | 822   | 766   | 805   | 669   | 612   | 637   | 558   | 594   | 637   | 601   | 566   | 627   | 500   | 615   | 935   | 812   | 677   | 954   | 781   | 724   | Nudt14   |
| Nudt15   | 103   | 81    | 134   | 88    | 100   | 109   | 94    | 501   | 468   | 521   | 446   | 655   | 616   | 574   | 108   | 75    | 96    | 70    | 125   | 134   | 101   | 438   | 487   | 506   | 393   | 613   | 625   | 676   | Nudt15   |
| Nudt16   | 424   | 437   | 501   | 579   | 586   | 505   | 580   | 620   | 579   | 694   | 557   | 723   | 615   | 653   | 462   | 355   | 481   | 473   | 543   | 480   | 549   | 645   | 574   | 699   | 690   | 655   | 607   | 610   | Nudt16   |
| Nudt16i1 | 2119  | 2854  | 2401  | 2435  | 2216  | 2121  | 2125  | 2943  | 3179  | 3020  | 2922  | 2965  | 3070  | 2721  | 2113  | 2287  | 2395  | 2272  | 2361  | 2340  | 2188  | 2582  | 3117  | 2953  | 2935  | 3379  | 3020  | 2894  | Nudt16i1 |
| Nudt16i2 | 0     | 0     | 0     | 3     | 0     | 0     | 2     | 0     | 0     | 0     | 0     | 0     | 0     | 0     | 0     | 0     | 0     | 1     | 0     | 0     | 0     | 0     | 0     | 0     | 0     | 0     | 2     | 0     | Nudt16i2 |
| Nudt17   | 135   |       |       |       |       |       |       |       |       |       |       |       |       |       |       |       |       |       |       |       |       |       |       |       |       |       |       |       |          |

|           |       |       |       |       |       |       |       |       |       |       |       |       |       |       |       |       |       |       |       |       |       |       |       |       |       |       |       |       |           |       |
|-----------|-------|-------|-------|-------|-------|-------|-------|-------|-------|-------|-------|-------|-------|-------|-------|-------|-------|-------|-------|-------|-------|-------|-------|-------|-------|-------|-------|-------|-----------|-------|
| Nup37     | 1698  | 1293  | 1701  | 1151  | 905   | 1008  | 1237  | 1884  | 1757  | 1496  | 1284  | 1970  | 1850  | 1876  | 1639  | 1466  | 1350  | 927   | 1058  | 1319  | 1070  | 1325  | 1608  | 1618  | 1371  | 2390  | 1998  | 2172  | Nup37     |       |
| Nup43     | 1     | 0     | 1     | 1     | 0     | 0     | 0     | 0     | 0     | 0     | 0     | 0     | 0     | 0     | 1     | 0     | 0     | 0     | 0     | 0     | 0     | 0     | 0     | 0     | 0     | 1     | 0     | 0     | 0         | Nup43 |
| Nup50     | 9059  | 9627  | 11571 | 10312 | 9061  | 9197  | 9261  | 7684  | 7175  | 8231  | 7754  | 10516 | 9377  | 9845  | 8768  | 9290  | 11097 | 9750  | 10075 | 8086  | 9232  | 8012  | 7150  | 9073  | 8645  | 10411 | 10089 | 10834 | Nup50     |       |
| Nup54     | 4618  | 4023  | 4194  | 3820  | 3560  | 3844  | 4276  | 4251  | 3593  | 3321  | 3401  | 3910  | 3627  | 4320  | 4762  | 4144  | 3894  | 3745  | 3781  | 4330  | 4010  | 3611  | 3660  | 3503  | 3551  | 4358  | 4107  | 4196  | Nup54     |       |
| Nup62     | 5479  | 5869  | 5643  | 4946  | 4626  | 4644  | 4612  | 5175  | 5112  | 4590  | 4487  | 5800  | 5186  | 5331  | 4992  | 4817  | 5337  | 4605  | 5307  | 5191  | 4818  | 4231  | 4803  | 5426  | 4861  | 7210  | 5977  | 6157  | Nup62     |       |
| Nup62cl   | 657   | 555   | 597   | 566   | 392   | 412   | 465   | 199   | 157   | 102   | 84    | 113   | 59    | 133   | 686   | 719   | 501   | 565   | 445   | 616   | 436   | 142   | 164   | 117   | 110   | 213   | 128   | 109   | Nup62cl   |       |
| Nup85     | 7782  | 8325  | 7819  | 7275  | 5599  | 5919  | 6686  | 5594  | 5632  | 5185  | 5006  | 6780  | 5761  | 6404  | 7038  | 6968  | 7430  | 6929  | 6743  | 6710  | 6366  | 4941  | 5467  | 6044  | 5512  | 7721  | 6782  | 6838  | Nup85     |       |
| Nup88     | 9852  | 9615  | 8615  | 8388  | 8182  | 8091  | 9227  | 10683 | 9194  | 8503  | 8266  | 10405 | 9074  | 10513 | 10042 | 8256  | 8574  | 8051  | 8712  | 9644  | 9128  | 8864  | 8958  | 9584  | 9290  | 10849 | 9952  | 10453 | Nup88     |       |
| Nup93     | 10934 | 11685 | 10587 | 9048  | 7243  | 8177  | 9020  | 5808  | 5618  | 4985  | 4871  | 6808  | 6099  | 6879  | 10085 | 9544  | 9929  | 8692  | 8770  | 8789  | 8842  | 4772  | 5242  | 5760  | 5268  | 7766  | 7127  | 7021  | Nup93     |       |
| Nup98     | 10785 | 10682 | 9185  | 9083  | 7565  | 8896  | 8933  | 8182  | 8175  | 7859  | 7717  | 8788  | 8345  | 9082  | 9969  | 10596 | 8951  | 8910  | 8504  | 7940  | 8807  | 7641  | 7780  | 7514  | 8082  | 7421  | 9128  | 9175  | Nup98     |       |
| Nup1      | 3     | 2     | 10    | 8     | 4     | 11    | 2     | 0     | 0     | 0     | 0     | 0     | 0     | 0     | 1     | 2     | 0     | 11    | 1     | 2     | 4     | 2     | 2     | 3     | 0     | 3     | 0     | 1     | Nup1      |       |
| Nup2      | 670   | 628   | 688   | 578   | 646   | 640   | 677   | 981   | 924   | 921   | 858   | 1037  | 972   | 1008  | 720   | 620   | 644   | 603   | 581   | 610   | 653   | 881   | 927   | 910   | 1023  | 1113  | 992   | 970   | Nup2      |       |
| Nupr1     | 37    | 34    | 73    | 44    | 55    | 51    | 19    | 101   | 153   | 101   | 180   | 88    | 102   | 95    | 28    | 55    | 32    | 51    | 25    | 43    | 38    | 134   | 203   | 117   | 104   | 177   | 134   | 89    | Nupr1     |       |
| Nupr1l    | 133   | 123   | 137   | 143   | 121   | 130   | 142   | 73    | 89    | 99    | 93    | 119   | 96    | 110   | 112   | 123   | 140   | 127   | 112   | 96    | 125   | 92    | 90    | 118   | 108   | 106   | 84    | 116   | Nupr1l    |       |
| Nus1      | 8176  | 6424  | 8498  | 8141  | 7531  | 8000  | 8496  | 7457  | 6576  | 7129  | 7408  | 7651  | 7439  | 7549  | 8044  | 7139  | 7954  | 7955  | 8231  | 7594  | 8169  | 8189  | 6701  | 7462  | 7492  | 7874  | 7524  | 7834  | Nus1      |       |
| Nusap1    | 9024  | 7311  | 9655  | 6704  | 5499  | 6811  | 7996  | 8745  | 7066  | 6322  | 6235  | 10115 | 8217  | 10989 | 8997  | 7357  | 8274  | 5969  | 7221  | 8596  | 7055  | 5715  | 6679  | 8541  | 7367  | 12222 | 10339 | 11089 | Nusap1    |       |
| Nusf2     | 4035  | 4774  | 4974  | 4088  | 3317  | 3256  | 3768  | 3275  | 3368  | 3160  | 3065  | 3898  | 3823  | 4415  | 3774  | 4161  | 4292  | 3813  | 3821  | 3845  | 3593  | 2906  | 3565  | 3709  | 3420  | 5076  | 4773  | 4652  | Nusf2     |       |
| Nutf2-ps1 | 501   | 422   | 562   | 397   | 357   | 421   | 399   | 337   | 393   | 337   | 277   | 449   | 549   | 408   | 525   | 465   | 400   | 387   | 498   | 424   | 348   | 312   | 355   | 382   | 375   | 511   | 508   | 476   | Nutf2-ps1 |       |
| Nutm1     | 0     | 1     | 0     | 1     | 0     | 3     | 0     | 2     | 1     | 0     | 0     | 0     | 2     | 0     | 3     | 3     | 0     | 7     | 0     | 1     | 3     | 0     | 0     | 2     | 0     | 0     | 0     | 0     | Nutm1     |       |
| Nutm2     | 0     | 3     | 0     | 0     | 0     | 1     | 0     | 0     | 1     | 0     | 0     | 0     | 0     | 0     | 0     | 0     | 0     | 0     | 0     | 0     | 0     | 0     | 0     | 0     | 0     | 0     | 0     | 0     | Nutm2     |       |
| Nvl       | 11389 | 10477 | 8416  | 9395  | 9226  | 10205 | 10830 | 12233 | 11471 | 10646 | 10900 | 11643 | 11208 | 12398 | 10714 | 10103 | 8914  | 9085  | 9245  | 10609 | 10797 | 10594 | 10804 | 10323 | 11296 | 9481  | 11517 | 11585 | Nvl       |       |
| Nwd1      | 728   | 862   | 449   | 1229  | 1633  | 1421  | 1305  | 686   | 854   | 693   | 654   | 440   | 392   | 460   | 890   | 770   | 734   | 1438  | 1194  | 1108  | 1480  | 734   | 628   | 466   | 835   | 233   | 347   | 260   | Nwd1      |       |
| Nwd2      | 157   | 195   | 197   | 286   | 760   | 436   | 421   | 1172  | 1210  | 1325  | 1325  | 500   | 871   | 550   | 322   | 210   | 196   | 353   | 386   | 450   | 442   | 1527  | 1017  | 566   | 867   | 261   | 629   | 579   | Nwd2      |       |
| Nxf1      | 21917 | 23590 | 19498 | 19621 | 16827 | 17818 | 19986 | 17068 | 15888 | 15059 | 14168 | 14995 | 16594 | 21606 | 20654 | 19986 | 19202 | 18770 | 19646 | 18812 | 15542 | 14870 | 15634 | 15198 | 16256 | 15933 | 16369 | Nxf1  |           |       |
| Nxf2      | 52    | 46    | 61    | 27    | 22    | 15    | 21    | 26    | 64    | 56    | 40    | 38    | 56    | 34    | 45    | 54    | 21    | 26    | 24    | 37    | 22    | 35    | 52    | 44    | 31    | 43    | 42    | 31    | Nxf2      |       |
| Nxf3      | 3     | 2     | 0     | 1     | 6     | 1     | 2     | 2     | 5     | 8     | 2     | 1     | 5     | 2     | 3     | 4     | 2     | 7     | 3     | 2     | 2     | 5     | 3     | 1     | 3     | 1     | 1     | 1     | Nxf3      |       |
| Nxf7      | 2     | 4     | 3     | 1     | 3     | 4     | 1     | 1     | 9     | 3     | 5     | 5     | 9     | 0     | 1     | 2     | 0     | 2     | 5     | 1     | 1     | 0     | 6     | 0     | 1     | 0     | 5     | 2     | Nxf7      |       |
| Nxn       | 8155  | 9297  | 8920  | 6983  | 5905  | 6451  | 5707  | 4962  | 5912  | 4985  | 5224  | 5906  | 5994  | 5223  | 7727  | 8375  | 7674  | 6972  | 6551  | 6607  | 5830  | 3952  | 6609  | 5322  | 4243  | 6568  | 6465  | 6518  | Nxn       |       |
| Nxn1      | 2     | 4     | 9     | 6     | 1     | 11    | 1     | 1     | 5     | 1     | 7     | 0     | 3     | 1     | 1     | 2     | 7     | 0     | 0     | 10    | 2     | 0     | 5     | 7     | 1     | 2     | 0     | 1     | Nxn1      |       |
| Nxn2      | 183   | 176   | 122   | 131   | 101   | 93    | 105   | 33    | 69    | 56    | 71    | 21    | 76    | 23    | 141   | 147   | 131   | 111   | 110   | 60    | 120   | 35    | 63    | 45    | 29    | 73    | 22    | 21    | Nxn2      |       |
| Nxpe2     | 37    | 23    | 24    | 31    | 24    | 25    | 37    | 22    | 39    | 21    | 26    | 27    | 39    | 27    | 26    | 37    | 31    | 62    | 35    | 37    | 28    | 32    | 16    | 29    | 41    | 36    | 43    | Nxpe2 |           |       |
| Nxpe3     | 1449  | 1283  | 1601  | 1473  | 1622  | 1497  | 1578  | 882   | 707   | 745   | 710   | 789   | 780   | 827   | 1493  | 1504  | 1424  | 1536  | 1515  | 1488  | 1487  | 866   | 659   | 830   | 856   | 843   | 780   | 853   | Nxpe3     |       |
| Nxpe4     | 1183  | 1057  | 941   | 9171  | 945   | 1044  | 874   | 978   | 1051  | 917   | 935   | 1153  | 1193  | 1045  | 1305  | 1148  | 988   | 857   | 812   | 953   | 880   | 1084  | 1060  | 804   | 913   | 1094  | 1270  | 1123  | Nxpe4     |       |
| Nxpe5     | 1     | 0     | 0     | 0     | 1     | 0     | 0     | 0     | 0     | 0     | 0     | 0     | 0     | 0     | 0     | 0     | 0     | 1     | 0     | 0     | 0     | 0     | 1     | 0     | 4     | 0     | 0     | 0     | Nxpe5     |       |
| Nxph1     | 296   | 322   | 304   | 462   | 877   | 646   | 636   | 1688  | 1548  | 1619  | 1387  | 958   | 1024  | 1008  | 458   | 287   | 396   | 416   | 608   | 797   | 697   | 2164  | 1713  | 1066  | 1475  | 659   | 1030  | 958   | Nxph1     |       |
| Nxph2     | 2     | 5     | 0     | 10    | 16    | 9     | 35    | 53    | 78    | 102   | 74    | 18    | 18    | 28    | 8     | 3     | 3     | 12    | 18    | 30    | 27    | 74    | 74    | 81    | 105   | 16    | 10    | 17    | Nxph2     |       |
| Nxph3     | 625   | 677   | 754   | 664   | 696   | 693   | 562   | 253   | 339   | 416   | 268   | 181   | 202   | 180   | 462   | 603   | 728   | 595   | 772   | 618   | 644   | 244   | 332   | 403   | 371   | 250   | 172   | 153   | Nxph3     |       |
| Nxph4     | 614   | 902   | 744   | 1488  | 1960  | 1371  | 1192  | 1274  | 1267  | 1879  | 1521  | 1596  | 1430  | 1505  | 612   | 700   | 1138  | 1383  | 1568  | 1302  | 1381  | 1810  | 1374  | 1541  | 1721  | 1542  | 1191  | 1301  | Nxph4     |       |
| Nxt1      | 2013  | 2273  | 2086  | 1943  | 1150  | 1443  | 1715  | 1285  | 1236  | 1129  | 1055  | 1460  | 1245  | 1706  | 1814  | 1890  | 1910  | 1448  | 1538  | 1837  | 1535  | 882   | 1178  | 1493  | 1281  | 1891  | 1680  | 1856  | Nxt1      |       |
| Nxt2      | 1431  | 948   | 1243  | 1150  | 1126  | 1371  | 1506  | 1360  | 1219  | 1031  | 1021  | 1111  | 959   | 1221  | 1490  | 1262  | 1159  | 1113  | 1338  | 1704  | 1398  | 1091  | 1229  | 1066  | 1135  | 1343  | 1163  | 1227  | Nxt2      |       |
| Nyap1     | 5230  | 7768  | 6797  | 10202 | 10759 | 9523  | 9332  | 6977  | 7030  | 9236  | 7053  | 7752  | 6210  | 7535  | 6001  | 5439  | 9043  | 9678  | 11187 | 9248  | 10735 | 9000  | 6748  | 9334  | 10104 | 6872  | 6923  | 6961  | Nyap1     |       |
| Nyap2     | 284   | 265   | 273   | 666   | 1469  | 1022  | 1012  | 1340  | 1351  | 1408  | 1470  | 960   | 984   | 1040  | 494   | 342   | 495   | 815   | 831   | 765   | 944   | 2132  | 1272  | 974   | 1671  | 525   | 827   | 875   | Nyap2     |       |
| Nyrrin    | 10150 | 11295 | 14566 | 10353 | 9914  | 10248 | 8027  | 9163  | 12395 | 12093 | 13797 | 13523 | 14731 | 11897 | 8817  | 11728 | 12694 | 10469 | 10952 | 7361  | 8643  | 11757 | 12693 | 13197 | 10861 | 13299 | 13618 | 12936 | Nyrrin    |       |
| Nyx       | 14    | 20    | 19    | 23    | 46    | 29    | 37    | 57    | 53    | 50    | 63    | 35    | 56    | 37    | 25    | 21    | 36    | 23    | 26    | 38    | 25    | 80    | 39    | 41    | 54    | 44    | 56    | 58    | Nyx       |       |
| Oacyl     | 60    | 63    | 30    | 48    | 79    | 58    | 60    | 90    | 73    | 80    | 105   | 91    | 155   | 116   | 45    | 41    | 54    | 55    | 49    | 42    | 71    | 99    | 89    | 69    | 64    | 123   | 87    | Oacyl |           |       |
| Oaf       | 1938  | 2179  | 1735  | 1269  | 734   | 1188  | 761   | 1166  | 1638  | 1142  | 2046  | 1065  | 1500  | 953   | 1681  | 2549  | 1199  | 1346  | 850   | 907   | 760   | 1089  | 2008  | 1223  | 955   | 1475  | 1203  | 1116  | Oaf       |       |
| Oard1     | 495   | 450   | 803   | 456   | 98    | 127   | 422   | 551   | 587   | 548   | 135   | 291   | 389   | 188   | 695   | 136   | 486   | 364   | 157   | 278   | 104   | 906   | 867   | 588   | 491   | 1265  | 809   | 222   | Oard1     |       |
| Oas1a     | 22    | 30    | 13    | 22    | 11    | 18    | 4     | 20    | 25    | 29    | 45    | 22    | 14    | 20    | 23    | 43    | 17    | 9     | 41    | 21    | 32    | 39    | 34    | 30    | 37    | 36    | 49    | Oas1a |           |       |
| Oas1c     | 68    | 60    | 52    | 55    | 61    | 55    | 40    | 42    | 50    | 34    | 50    | 39    | 49    | 57    | 75    | 54    | 92    | 44    | 47    | 66    | 55    | 40    | 47    | 43    | 46    | 83    | 48    | 33    | Oas1c     |       |
| Oas1d     | 0     | 0     | 0     | 0     | 0     | 0     | 0     | 0     | 1     | 0     | 1     | 2     | 1     | 1     | 4     | 0     | 0     | 0     | 2     | 0     | 0     | 0     | 0     | 0     | 0     | 0     | 0     | 0     | Oas1d     |       |
| Oas1e     | 0     | 0     | 0     | 3     | 2     | 2     | 3     | 5     | 3     | 0     | 7     | 8     | 6     | 5     | 4     | 2     | 3     | 0     | 2     | 4     | 3     | 5     | 5     | 1     | 0     | 4     | 2     | 7     | Oas1e     |       |
| O         |       |       |       |       |       |       |       |       |       |       |       |       |       |       |       |       |       |       |       |       |       |       |       |       |       |       |       |       |           |       |



|         |       |       |       |       |       |       |       |       |       |       |       |       |       |       |       |       |       |       |       |       |       |       |       |       |       |       |       |       |         |
|---------|-------|-------|-------|-------|-------|-------|-------|-------|-------|-------|-------|-------|-------|-------|-------|-------|-------|-------|-------|-------|-------|-------|-------|-------|-------|-------|-------|-------|---------|
| Odad2   | 40    | 56    | 20    | 33    | 41    | 61    | 49    | 34    | 32    | 34    | 34    | 68    | 53    | 38    | 54    | 58    | 43    | 52    | 48    | 41    | 42    | 84    | 72    | 39    | 26    | 16    | 28    | 30    | Odad2   |
| Odad3   | 474   | 698   | 751   | 680   | 521   | 492   | 520   | 380   | 358   | 491   | 277   | 478   | 460   | 466   | 512   | 523   | 643   | 643   | 641   | 603   | 530   | 416   | 440   | 433   | 437   | 447   | 431   | 436   | Odad3   |
| Odad4   | 170   | 222   | 235   | 192   | 244   | 201   | 228   | 171   | 180   | 207   | 133   | 237   | 225   | 217   | 204   | 194   | 191   | 212   | 204   | 248   | 194   | 222   | 274   | 182   | 214   | 194   | 217   | 189   | Odad4   |
| Odad5   | 0     | 0     | 0     | 0     | 0     | 0     | 0     | 2     | 0     | 0     | 1     | 0     | 0     | 0     | 0     | 0     | 0     | 0     | 0     | 0     | 0     | 0     | 2     | 0     | 0     | 0     | 0     | 0     | Odad5   |
| Odaph   | 8     | 4     | 2     | 2     | 2     | 1     | 2     | 2     | 6     | 0     | 4     | 4     | 9     | 4     | 1     | 6     | 9     | 3     | 4     | 4     | 10    | 0     | 1     | 2     | 0     | 2     | 1     | 4     | Odaph   |
| Od1     | 34783 | 34089 | 30395 | 30007 | 21669 | 25326 | 26585 | 18070 | 18728 | 16491 | 16711 | 22518 | 20924 | 22311 | 34474 | 31755 | 28875 | 28080 | 24188 | 27006 | 25556 | 14878 | 17697 | 18336 | 18070 | 25274 | 21896 | 23518 | Od1     |
| Od2     | 16504 | 17855 | 15772 | 16979 | 15419 | 16390 | 16508 | 9343  | 9527  | 10382 | 9518  | 11983 | 11455 | 12456 | 15523 | 14789 | 16220 | 16011 | 16673 | 16482 | 17130 | 8913  | 8709  | 10145 | 10901 | 11571 | 12459 | 11921 | Od2     |
| Od2f1   | 2321  | 1853  | 1960  | 1932  | 1874  | 2129  | 2274  | 4131  | 3466  | 3527  | 3408  | 4449  | 3957  | 4413  | 2301  | 2011  | 2060  | 1749  | 2068  | 2276  | 2215  | 3355  | 3345  | 3703  | 3605  | 3611  | 4482  | 4296  | Od2f1   |
| Od3     | 0     | 0     | 0     | 0     | 1     | 0     | 0     | 0     | 1     | 2     | 2     | 0     | 0     | 0     | 0     | 0     | 0     | 0     | 0     | 0     | 0     | 2     | 2     | 0     | 0     | 1     | 0     | 0     | Od3     |
| Od3b    | 3     | 16    | 8     | 11    | 16    | 13    | 28    | 13    | 26    | 18    | 21    | 24    | 32    | 13    | 9     | 24    | 16    | 7     | 19    | 17    | 12    | 12    | 33    | 5     | 31    | 13    | 6     | 17    | Od3b    |
| Od31    | 1     | 0     | 0     | 1     | 0     | 2     | 2     | 2     | 13    | 10    | 18    | 2     | 12    | 1     | 0     | 0     | 0     | 2     | 2     | 0     | 2     | 10    | 24    | 4     | 0     | 6     | 0     | 0     | Od31    |
| Od312   | 0     | 0     | 0     | 0     | 0     | 0     | 0     | 1     | 1     | 5     | 2     | 1     | 0     | 2     | 0     | 0     | 0     | 0     | 0     | 0     | 0     | 0     | 1     | 0     | 7     | 0     | 0     | 0     | Od312   |
| Od4     | 24    | 29    | 22    | 103   | 118   | 91    | 61    | 57    | 44    | 74    | 58    | 63    | 68    | 50    | 33    | 28    | 54    | 78    | 84    | 82    | 82    | 102   | 59    | 75    | 98    | 36    | 45    | 36    | Od4     |
| Od4r    | 1939  | 1581  | 1900  | 1736  | 1871  | 1991  | 1953  | 3745  | 3540  | 3144  | 3679  | 3113  | 3319  | 3350  | 2197  | 1896  | 1773  | 1827  | 1755  | 2080  | 1885  | 3430  | 3724  | 3322  | 3367  | 3240  | 3197  | 3336  | Od4r    |
| Ofcc1   | 2     | 0     | 3     | 2     | 4     | 1     | 1     | 1     | 4     | 0     | 8     | 1     | 3     | 1     | 0     | 1     | 0     | 4     | 3     | 0     | 4     | 8     | 2     | 1     | 6     | 0     | 1     | 0     | Ofcc1   |
| Odf1    | 1885  | 1476  | 1455  | 1531  | 1818  | 1852  | 1804  | 2214  | 2071  | 2252  | 2095  | 2437  | 2394  | 2529  | 1975  | 1656  | 1727  | 1585  | 1785  | 1629  | 1726  | 2383  | 2053  | 2128  | 2243  | 2513  | 2474  | 2425  | Odf1    |
| Oga     | 25622 | 19587 | 22909 | 25126 | 26124 | 25303 | 28641 | 30879 | 25818 | 26951 | 25440 | 28241 | 27372 | 30404 | 25913 | 19805 | 23549 | 25312 | 25860 | 24713 | 27142 | 32174 | 25509 | 27400 | 29593 | 24686 | 28469 | 28324 | Oga     |
| Ogdh    | 9912  | 10940 | 12073 | 11950 | 11582 | 10786 | 11039 | 7222  | 8713  | 8955  | 9728  | 10461 | 9964  | 10068 | 9646  | 11130 | 11932 | 12143 | 12446 | 8174  | 11563 | 10029 | 8393  | 9459  | 9717  | 9749  | 9009  | 10610 | Ogdh    |
| Ogdhl   | 2489  | 2984  | 3040  | 3023  | 3126  | 2930  | 2854  | 2380  | 2756  | 3080  | 2647  | 3077  | 2718  | 3012  | 2457  | 2842  | 2955  | 2840  | 3096  | 2492  | 2918  | 2694  | 2359  | 3103  | 2976  | 2779  | 3004  | 2847  | Ogdhl   |
| Ogfd1   | 6195  | 5581  | 5057  | 5234  | 4565  | 5147  | 5357  | 2072  | 2174  | 2124  | 2168  | 1988  | 2139  | 2186  | 5408  | 5942  | 4926  | 5714  | 4710  | 4649  | 5126  | 2034  | 2092  | 2175  | 2081  | 1937  | 2037  | 2034  | Ogfd1   |
| Ogfd2   | 1559  | 1957  | 1807  | 2334  | 1789  | 1651  | 1757  | 767   | 839   | 1015  | 995   | 825   | 886   | 811   | 1501  | 1606  | 1976  | 2042  | 1912  | 1554  | 1833  | 967   | 813   | 1056  | 981   | 918   | 786   | 838   | Ogfd2   |
| Ogfd3   | 200   | 221   | 270   | 251   | 243   | 210   | 208   | 379   | 419   | 425   | 472   | 428   | 407   | 501   | 231   | 243   | 226   | 286   | 251   | 214   | 233   | 501   | 478   | 469   | 463   | 561   | 496   | 478   | Ogfd3   |
| Ogr     | 5066  | 6183  | 6047  | 5336  | 5099  | 5395  | 4828  | 5915  | 6297  | 6481  | 6200  | 7014  | 6319  | 6976  | 4837  | 5145  | 6128  | 4934  | 5424  | 5309  | 4866  | 5870  | 6090  | 6785  | 6657  | 7555  | 7277  | 7321  | Ogr     |
| Ogrf1   | 3895  | 2888  | 3435  | 3633  | 3871  | 3839  | 4405  | 2186  | 2183  | 2164  | 2280  | 2048  | 1972  | 2074  | 3944  | 3389  | 3264  | 3779  | 3532  | 3685  | 3948  | 2216  | 2059  | 1931  | 2306  | 2209  | 2011  | 2007  | Ogrf1   |
| Ogg1    | 827   | 917   | 1016  | 982   | 745   | 788   | 853   | 618   | 702   | 742   | 657   | 764   | 744   | 765   | 845   | 904   | 914   | 872   | 847   | 752   | 827   | 483   | 691   | 690   | 585   | 1024  | 873   | 809   | Ogg1    |
| Ogn     | 1912  | 1320  | 1292  | 1264  | 883   | 1749  | 419   | 3907  | 5750  | 3541  | 6732  | 2318  | 3139  | 2263  | 2339  | 2163  | 1455  | 2272  | 532   | 607   | 567   | 4318  | 9123  | 3501  | 2873  | 2661  | 2593  | 2136  | Ogn     |
| Ogt     | 35634 | 29627 | 22961 | 29332 | 35346 | 36886 | 35933 | 60137 | 50507 | 45685 | 47719 | 45581 | 45245 | 46249 | 36636 | 31291 | 26103 | 30463 | 32515 | 39933 | 38873 | 49504 | 49458 | 39795 | 48392 | 30511 | 46586 | 42925 | Ogt     |
| Oip5    | 952   | 822   | 972   | 780   | 524   | 695   | 810   | 790   | 641   | 741   | 654   | 1108  | 885   | 1041  | 985   | 768   | 846   | 646   | 726   | 851   | 755   | 550   | 734   | 894   | 687   | 1360  | 1148  | 1164  | Oip5    |
| Oit3    | 22    | 43    | 15    | 30    | 24    | 17    | 15    | 21    | 37    | 23    | 23    | 25    | 28    | 29    | 21    | 36    | 20    | 31    | 26    | 17    | 7     | 40    | 52    | 25    | 23    | 18    | 33    | 20    | Oit3    |
| Ola1    | 9358  | 7372  | 8434  | 8434  | 7494  | 7307  | 9952  | 5924  | 5241  | 5502  | 5673  | 5764  | 5586  | 6829  | 8930  | 7812  | 8538  | 8538  | 7783  | 7483  | 9099  | 5299  | 5640  | 5929  | 2685  | 7171  | 5711  | 6812  | Ola1    |
| Olah    | 0     | 0     | 0     | 0     | 0     | 3     | 1     | 1     | 4     | 2     | 1     | 1     | 0     | 4     | 0     | 1     | 0     | 1     | 0     | 2     | 0     | 3     | 2     | 1     | 2     | 2     | 2     | 1     | Olah    |
| Olfm1   | 4791  | 5958  | 6607  | 8297  | 13394 | 8995  | 8599  | 9962  | 10214 | 12964 | 10983 | 9036  | 10103 | 8527  | 7292  | 5766  | 8553  | 9564  | 9845  | 7627  | 9671  | 16001 | 9985  | 10003 | 11878 | 7028  | 7031  | 7659  | Olfm1   |
| Olfm2   | 1466  | 2207  | 1855  | 2691  | 3503  | 2608  | 2855  | 1928  | 2347  | 2853  | 2105  | 1767  | 1852  | 1713  | 1799  | 1567  | 2504  | 2751  | 3250  | 2546  | 3153  | 3105  | 2221  | 2111  | 2715  | 1434  | 1411  | 1447  | Olfm2   |
| Olfm3   | 221   | 244   | 325   | 442   | 776   | 525   | 588   | 570   | 492   | 480   | 460   | 260   | 435   | 229   | 414   | 329   | 337   | 471   | 471   | 694   | 589   | 802   | 557   | 282   | 519   | 104   | 225   | 279   | Olfm3   |
| Olfm4   | 38    | 36    | 50    | 84    | 54    | 54    | 66    | 65    | 53    | 65    | 130   | 77    | 91    | 56    | 71    | 60    | 67    | 86    | 43    | 61    | 58    | 82    | 110   | 95    | 52    | 77    | 70    | 69    | Olfm4   |
| Olfm5   | 8     | 0     | 0     | 0     | 0     | 0     | 0     | 277   | 190   | 357   | 149   | 2     | 2     | 0     | 7     | 8     | 0     | 0     | 0     | 0     | 0     | 2     | 366   | 358   | 0     | 56    | 0     | 0     | Olfm5   |
| Olfm11  | 638   | 447   | 358   | 288   | 149   | 281   | 86    | 646   | 751   | 561   | 715   | 401   | 645   | 392   | 512   | 642   | 283   | 329   | 119   | 126   | 115   | 460   | 889   | 556   | 448   | 619   | 444   | 417   | Olfm11  |
| Olfm12a | 762   | 772   | 760   | 630   | 893   | 753   | 324   | 1159  | 1866  | 1477  | 2025  | 993   | 1302  | 1001  | 880   | 970   | 611   | 942   | 389   | 336   | 348   | 1927  | 2318  | 1104  | 1204  | 837   | 896   | 926   | Olfm12a |
| Olfm12b | 423   | 482   | 436   | 477   | 551   | 461   | 349   | 496   | 775   | 629   | 1345  | 533   | 533   | 486   | 430   | 452   | 433   | 475   | 536   | 416   | 369   | 590   | 1019  | 599   | 559   | 571   | 453   | 468   | Olfm12b |
| Olfm13  | 971   | 961   | 770   | 635   | 458   | 859   | 268   | 1495  | 2208  | 1793  | 2785  | 1149  | 1890  | 1230  | 956   | 1206  | 671   | 940   | 348   | 320   | 325   | 1653  | 2589  | 1750  | 1280  | 1807  | 1363  | 1347  | Olfm13  |
| Olf1    | 0     | 0     | 0     | 0     | 0     | 0     | 0     | 0     | 0     | 1     | 2     | 0     | 0     | 0     | 0     | 0     | 0     | 0     | 0     | 0     | 0     | 0     | 0     | 0     | 0     | 0     | 0     | 0     | Olf1    |
| Olf10   | 0     | 0     | 0     | 4     | 4     | 0     | 0     | 0     | 0     | 0     | 0     | 4     | 1     | 0     | 0     | 0     | 5     | 6     | 0     | 0     | 4     | 0     | 0     | 2     | 3     | 1     | 0     | 0     | Olf10   |
| Olf1000 | 0     | 0     | 0     | 0     | 0     | 0     | 0     | 0     | 0     | 0     | 0     | 0     | 0     | 0     | 0     | 0     | 0     | 0     | 0     | 0     | 0     | 0     | 0     | 0     | 0     | 1     | 0     | 0     | Olf1000 |
| Olf1002 | 0     | 0     | 0     | 0     | 0     | 0     | 0     | 0     | 0     | 0     | 2     | 0     | 0     | 0     | 0     | 0     | 0     | 0     | 0     | 0     | 0     | 0     | 0     | 0     | 0     | 0     | 0     | 0     | Olf1002 |
| Olf1006 | 0     | 0     | 0     | 1     | 0     | 0     | 0     | 2     | 3     | 6     | 6     | 0     | 0     | 0     | 1     | 2     | 0     | 0     | 0     | 0     | 0     | 0     | 5     | 4     | 0     | 5     | 0     | 1     | Olf1006 |
| Olf101  | 0     | 0     | 0     | 0     | 0     | 0     | 0     | 2     | 2     | 0     | 0     | 0     | 0     | 0     | 0     | 0     | 0     | 0     | 0     | 0     | 0     | 0     | 0     | 0     | 0     | 0     | 0     | 0     | Olf101  |
| Olf1012 | 0     | 0     | 0     | 0     | 0     | 0     | 0     | 0     | 0     | 0     | 0     | 0     | 0     | 0     | 0     | 0     | 0     | 0     | 0     | 0     | 0     | 0     | 1     | 0     | 0     | 0     | 0     | 0     | Olf1012 |
| Olf1013 | 0     | 0     | 0     | 0     | 0     | 0     | 0     | 0     | 0     | 1     | 0     | 0     | 0     | 0     | 0     | 0     | 0     | 0     | 0     | 0     | 0     | 0     | 1     | 0     | 0     | 2     | 0     | 0     | Olf1013 |
| Olf1014 | 0     | 0     | 0     | 0     | 0     | 0     | 0     | 0     | 0     | 0     | 1     | 0     | 0     | 0     | 0     | 0     | 0     | 0     | 0     | 0     | 0     | 0     | 1     | 0     | 0     | 0     | 0     | 0     | Olf1014 |
| Olf1015 | 0     | 0     | 0     | 0     | 0     | 0     | 0     | 0     | 2     | 0     | 0     | 0     | 0     | 0     | 0     | 0     | 0     | 0     | 0     | 0     | 0     | 0     | 0     | 0     | 0     | 0     | 0     | 0     | Olf1015 |
| Olf1016 | 0     | 0     | 0     | 0     | 0     | 0     | 0     | 1     | 2     | 0     | 1     | 0     | 0     | 0     | 0     | 0     | 0     | 0     | 0     | 0     | 0     | 1     | 2     | 0     | 3     | 0     | 0     | 0     | Olf1016 |
| Olf1018 | 0     | 0     | 0     | 0     | 0     | 0     | 0     | 0     | 0     | 0     | 1     | 0     | 1     | 0     | 0     | 0     | 0     | 0     | 0     | 0     | 0     | 0     | 2     | 0     | 0     | 0     | 0     | 0     | Olf1018 |
| Olf1019 | 1     | 0     | 0     | 0     | 0     | 0     | 0     | 0     | 0     | 0     | 0     | 0     | 1     | 0     | 0     | 0     | 0     | 0     | 0     | 0     | 0     | 0     | 0     | 0     | 0     | 0     | 0     | 0     | Olf1019 |
| Olf102  | 0     | 0     | 0     |       |       |       |       |       |       |       |       |       |       |       |       |       |       |       |       |       |       |       |       |       |       |       |       |       |         |























|             |    |    |    |    |    |    |    |    |    |    |    |    |    |   |    |    |    |    |    |    |    |    |    |    |   |         |             |         |         |
|-------------|----|----|----|----|----|----|----|----|----|----|----|----|----|---|----|----|----|----|----|----|----|----|----|----|---|---------|-------------|---------|---------|
| Olfr849     | 0  | 0  | 0  | 0  | 0  | 0  | 0  | 0  | 1  | 1  | 2  | 0  | 0  | 0 | 0  | 0  | 0  | 0  | 0  | 2  | 0  | 0  | 2  | 0  | 0 | Olfr849 |             |         |         |
| Olfr851     | 0  | 0  | 0  | 0  | 0  | 0  | 0  | 0  | 0  | 0  | 1  | 0  | 0  | 0 | 0  | 0  | 0  | 0  | 0  | 1  | 0  | 0  | 0  | 0  | 0 | Olfr851 |             |         |         |
| Olfr854     | 0  | 0  | 0  | 0  | 0  | 0  | 0  | 0  | 0  | 1  | 0  | 0  | 0  | 0 | 0  | 0  | 0  | 0  | 0  | 0  | 0  | 0  | 0  | 0  | 0 | Olfr854 |             |         |         |
| Olfr855     | 0  | 0  | 0  | 0  | 0  | 0  | 0  | 2  | 2  | 0  | 3  | 0  | 0  | 1 | 0  | 0  | 0  | 0  | 0  | 3  | 6  | 0  | 2  | 0  | 0 | Olfr855 |             |         |         |
| Olfr857     | 1  | 2  | 7  | 7  | 5  | 4  | 3  | 2  | 2  | 10 | 4  | 3  | 2  | 7 | 4  | 0  | 2  | 2  | 2  | 0  | 3  | 3  | 0  | 1  | 3 | 5       | Olfr857     |         |         |
| Olfr859     | 0  | 0  | 0  | 5  | 0  | 0  | 1  | 1  | 2  | 0  | 1  | 0  | 0  | 1 | 1  | 0  | 0  | 4  | 3  | 0  | 0  | 3  | 3  | 4  | 1 | 1       | 1           | Olfr859 |         |
| Olfr860     | 0  | 0  | 0  | 0  | 0  | 0  | 0  | 5  | 0  | 0  | 0  | 0  | 0  | 0 | 0  | 0  | 0  | 0  | 0  | 0  | 1  | 0  | 0  | 0  | 0 | 0       | Olfr860     |         |         |
| Olfr867     | 0  | 0  | 0  | 8  | 0  | 0  | 0  | 0  | 1  | 4  | 0  | 0  | 0  | 0 | 0  | 0  | 0  | 0  | 0  | 0  | 3  | 2  | 0  | 0  | 0 | 0       | Olfr867     |         |         |
| Olfr868     | 0  | 0  | 0  | 0  | 0  | 0  | 0  | 0  | 0  | 0  | 0  | 0  | 0  | 0 | 0  | 0  | 0  | 0  | 0  | 0  | 0  | 2  | 0  | 0  | 0 | 0       | Olfr868     |         |         |
| Olfr870     | 0  | 0  | 0  | 1  | 0  | 0  | 0  | 0  | 1  | 3  | 0  | 0  | 1  | 0 | 0  | 0  | 0  | 0  | 0  | 0  | 1  | 1  | 0  | 0  | 0 | 0       | Olfr870     |         |         |
| Olfr872     | 0  | 0  | 0  | 0  | 0  | 0  | 0  | 1  | 0  | 0  | 0  | 0  | 0  | 0 | 1  | 0  | 0  | 0  | 0  | 0  | 0  | 0  | 0  | 1  | 0 | 0       | Olfr872     |         |         |
| Olfr873     | 0  | 1  | 0  | 0  | 0  | 0  | 0  | 0  | 2  | 3  | 0  | 0  | 1  | 4 | 0  | 0  | 0  | 0  | 0  | 0  | 3  | 8  | 0  | 5  | 0 | 0       | Olfr873     |         |         |
| Olfr874     | 0  | 1  | 0  | 0  | 0  | 0  | 0  | 1  | 1  | 1  | 6  | 0  | 1  | 0 | 0  | 0  | 0  | 1  | 0  | 0  | 1  | 2  | 0  | 0  | 0 | 0       | Olfr874     |         |         |
| Olfr875     | 0  | 0  | 0  | 0  | 0  | 1  | 1  | 1  | 0  | 1  | 0  | 0  | 0  | 0 | 2  | 1  | 0  | 0  | 0  | 1  | 0  | 2  | 2  | 5  | 0 | 0       | Olfr875     |         |         |
| Olfr876     | 0  | 0  | 0  | 7  | 0  | 0  | 6  | 2  | 0  | 4  | 2  | 1  | 2  | 0 | 1  | 1  | 0  | 0  | 1  | 1  | 0  | 4  | 2  | 0  | 2 | 1       | 2           | Olfr876 |         |
| Olfr877     | 0  | 0  | 0  | 0  | 0  | 0  | 0  | 0  | 1  | 6  | 0  | 0  | 0  | 0 | 1  | 0  | 0  | 0  | 0  | 0  | 2  | 2  | 0  | 6  | 0 | 0       | Olfr877     |         |         |
| Olfr878     | 0  | 0  | 0  | 0  | 0  | 0  | 0  | 1  | 2  | 0  | 0  | 0  | 0  | 0 | 0  | 0  | 0  | 0  | 0  | 0  | 0  | 2  | 0  | 1  | 0 | 0       | Olfr878     |         |         |
| Olfr884     | 0  | 0  | 0  | 0  | 0  | 0  | 0  | 1  | 2  | 0  | 0  | 0  | 0  | 0 | 0  | 0  | 0  | 0  | 0  | 1  | 0  | 0  | 0  | 0  | 0 | 0       | Olfr884     |         |         |
| Olfr885     | 0  | 0  | 0  | 0  | 0  | 0  | 0  | 1  | 0  | 0  | 0  | 0  | 0  | 0 | 0  | 0  | 0  | 0  | 0  | 0  | 0  | 0  | 0  | 3  | 0 | 0       | Olfr885     |         |         |
| Olfr888     | 0  | 0  | 0  | 0  | 0  | 0  | 0  | 0  | 0  | 0  | 0  | 0  | 0  | 0 | 0  | 0  | 0  | 0  | 0  | 0  | 0  | 0  | 2  | 0  | 0 | 0       | Olfr888     |         |         |
| Olfr889     | 0  | 2  | 0  | 0  | 0  | 0  | 0  | 0  | 0  | 0  | 0  | 2  | 1  | 0 | 0  | 0  | 0  | 0  | 0  | 0  | 0  | 0  | 0  | 0  | 0 | 0       | Olfr889     |         |         |
| Olfr890     | 0  | 0  | 0  | 0  | 0  | 0  | 0  | 4  | 0  | 0  | 0  | 0  | 0  | 0 | 0  | 0  | 0  | 0  | 0  | 0  | 1  | 0  | 0  | 0  | 0 | 0       | Olfr890     |         |         |
| Olfr893     | 2  | 0  | 0  | 0  | 0  | 0  | 0  | 0  | 2  | 1  | 1  | 0  | 0  | 1 | 0  | 0  | 0  | 0  | 0  | 0  | 0  | 0  | 0  | 0  | 0 | 0       | Olfr893     |         |         |
| Olfr895     | 0  | 0  | 0  | 0  | 0  | 0  | 0  | 0  | 0  | 1  | 0  | 0  | 0  | 0 | 0  | 0  | 1  | 0  | 0  | 0  | 0  | 0  | 0  | 0  | 0 | 0       | Olfr895     |         |         |
| Olfr896-ps1 | 0  | 0  | 0  | 0  | 0  | 0  | 0  | 0  | 0  | 3  | 0  | 0  | 0  | 0 | 0  | 0  | 0  | 0  | 0  | 0  | 1  | 0  | 0  | 0  | 0 | 0       | Olfr896-ps1 |         |         |
| Olfr898     | 2  | 0  | 0  | 0  | 0  | 0  | 0  | 0  | 1  | 0  | 0  | 0  | 0  | 0 | 0  | 0  | 0  | 0  | 0  | 0  | 1  | 0  | 0  | 6  | 0 | 0       | Olfr898     |         |         |
| Olfr9       | 0  | 0  | 0  | 0  | 0  | 0  | 0  | 0  | 0  | 0  | 0  | 0  | 0  | 0 | 0  | 0  | 0  | 0  | 0  | 0  | 0  | 2  | 0  | 0  | 0 | 0       | Olfr9       |         |         |
| Olfr90      | 0  | 0  | 0  | 0  | 0  | 0  | 0  | 1  | 0  | 0  | 4  | 0  | 0  | 1 | 0  | 1  | 0  | 0  | 0  | 0  | 0  | 4  | 0  | 0  | 0 | 0       | Olfr90      |         |         |
| Olfr901     | 0  | 0  | 0  | 0  | 0  | 0  | 0  | 0  | 0  | 0  | 0  | 0  | 0  | 0 | 0  | 0  | 0  | 0  | 0  | 0  | 0  | 4  | 0  | 0  | 0 | 0       | Olfr901     |         |         |
| Olfr904     | 0  | 0  | 0  | 0  | 0  | 0  | 0  | 0  | 0  | 0  | 0  | 0  | 0  | 0 | 0  | 0  | 0  | 0  | 0  | 0  | 0  | 1  | 0  | 0  | 0 | 0       | Olfr904     |         |         |
| Olfr91      | 0  | 1  | 0  | 0  | 0  | 0  | 0  | 0  | 0  | 0  | 0  | 0  | 0  | 0 | 0  | 0  | 0  | 0  | 0  | 0  | 2  | 1  | 0  | 0  | 0 | 0       | Olfr91      |         |         |
| Olfr911-ps1 | 0  | 0  | 0  | 0  | 0  | 0  | 0  | 0  | 0  | 3  | 0  | 0  | 0  | 0 | 0  | 0  | 0  | 0  | 0  | 0  | 0  | 0  | 0  | 0  | 0 | 0       | Olfr911-ps1 |         |         |
| Olfr912     | 0  | 0  | 0  | 0  | 0  | 0  | 0  | 0  | 1  | 0  | 0  | 0  | 0  | 0 | 0  | 0  | 0  | 0  | 0  | 0  | 0  | 0  | 0  | 0  | 0 | 0       | Olfr912     |         |         |
| Olfr913     | 0  | 0  | 0  | 0  | 0  | 0  | 0  | 2  | 0  | 0  | 0  | 0  | 0  | 0 | 0  | 0  | 0  | 0  | 0  | 0  | 0  | 0  | 3  | 0  | 0 | 0       | Olfr913     |         |         |
| Olfr917     | 0  | 0  | 0  | 0  | 0  | 0  | 0  | 0  | 0  | 0  | 0  | 0  | 0  | 0 | 0  | 0  | 0  | 0  | 0  | 0  | 0  | 0  | 2  | 0  | 0 | 0       | Olfr917     |         |         |
| Olfr918     | 0  | 0  | 0  | 0  | 0  | 0  | 0  | 2  | 0  | 4  | 1  | 0  | 0  | 0 | 0  | 0  | 0  | 0  | 0  | 0  | 0  | 1  | 0  | 0  | 0 | 0       | Olfr918     |         |         |
| Olfr92      | 0  | 0  | 0  | 0  | 0  | 0  | 0  | 0  | 1  | 0  | 0  | 0  | 0  | 0 | 0  | 0  | 0  | 0  | 0  | 0  | 0  | 0  | 0  | 0  | 0 | 0       | Olfr92      |         |         |
| Olfr920     | 35 | 17 | 18 | 37 | 20 | 19 | 15 | 10 | 11 | 5  | 15 | 10 | 19 | 5 | 45 | 40 | 16 | 33 | 16 | 23 | 13 | 10 | 14 | 16 | 4 | 5       | 9           | 7       | Olfr920 |
| Olfr921     | 1  | 0  | 4  | 2  | 0  | 0  | 1  | 0  | 1  | 0  | 0  | 0  | 0  | 1 | 0  | 1  | 5  | 0  | 2  | 0  | 1  | 0  | 3  | 0  | 0 | 0       | 0           | Olfr921 |         |
| Olfr922     | 0  | 1  | 0  | 0  | 0  | 0  | 0  | 0  | 0  | 0  | 0  | 0  | 0  | 0 | 0  | 0  | 3  | 0  | 0  | 0  | 0  | 0  | 0  | 0  | 0 | 0       | Olfr922     |         |         |
| Olfr923     | 0  | 0  | 0  | 0  | 0  | 0  | 0  | 1  | 0  | 0  | 4  | 0  | 0  | 0 | 2  | 0  | 0  | 0  | 1  | 0  | 0  | 1  | 3  | 0  | 1 | 0       | 0           | Olfr923 |         |
| Olfr93      | 0  | 0  | 0  | 0  | 0  | 0  | 0  | 2  | 1  | 0  | 3  | 0  | 0  | 0 | 0  | 0  | 0  | 0  | 0  | 0  | 3  | 0  | 0  | 0  | 0 | 0       | 0           | Olfr93  |         |
| Olfr930     | 0  | 0  | 0  | 0  | 0  | 0  | 0  | 0  | 0  | 0  | 1  | 0  | 0  | 0 | 0  | 0  | 0  | 0  | 0  | 0  | 0  | 1  | 0  | 0  | 0 | 0       | 0           | Olfr930 |         |
| Olfr933     | 0  | 0  | 0  | 0  | 0  | 0  | 0  | 0  | 0  | 0  | 2  | 0  | 0  | 0 | 0  | 0  | 0  | 0  | 0  | 0  | 1  | 1  | 0  | 0  | 0 | 0       | 0           | Olfr933 |         |
| Olfr935     | 0  | 0  | 0  | 0  | 0  | 0  | 0  | 0  | 0  | 0  | 0  | 0  | 0  | 0 | 0  | 0  | 0  | 0  | 0  | 0  | 3  | 0  | 0  | 0  | 0 | 0       | 0           | Olfr935 |         |
| Olfr937     | 0  | 0  | 0  | 0  | 0  | 0  | 0  | 0  | 0  | 0  | 0  | 0  | 0  | 0 | 0  | 0  | 0  | 0  | 0  | 0  | 2  | 0  | 0  | 5  | 0 | 0       | 0           | Olfr937 |         |
| Olfr938     | 0  | 0  | 0  | 0  | 0  | 0  | 0  | 0  | 0  | 0  | 0  | 0  | 0  | 0 | 0  | 0  | 0  | 0  | 0  | 0  | 1  | 0  | 0  | 0  | 0 | 0       | 0           | Olfr938 |         |
| Olfr94      | 0  | 0  | 0  | 0  | 0  | 0  | 0  | 4  | 8  | 2  | 2  | 0  | 0  | 0 | 0  | 0  | 0  | 0  | 0  | 0  | 2  | 3  | 0  | 4  | 0 | 0       | 0           | Olfr94  |         |
| Olfr943     | 0  | 0  | 0  | 0  | 0  | 0  | 0  | 0  | 0  | 0  | 0  | 0  | 0  | 0 | 0  | 0  | 0  | 0  | 0  | 0  | 1  | 0  | 0  | 0  | 0 | 0       | 0           | Olfr943 |         |
| Olfr944     | 0  | 0  | 0  | 3  | 0  | 0  | 0  | 0  | 0  | 0  | 0  | 0  | 0  | 0 | 0  | 0  | 0  | 0  | 0  | 0  | 0  | 0  | 0  | 0  | 0 | 0       | 0           | Olfr944 |         |
| Olfr945     | 0  | 0  | 0  | 0  | 0  | 0  | 0  | 1  | 1  | 0  | 3  | 0  | 0  | 0 | 0  | 0  | 0  | 0  | 0  | 0  | 0  | 0  | 0  | 0  | 0 | 0       | 0           | Olfr945 |         |
| Olfr95      | 0  | 0  | 0  | 0  | 0  | 2  | 0  | 0  | 2  | 3  | 6  | 1  | 0  | 0 | 1  | 2  | 2  | 0  | 0  | 0  | 0  | 5  | 5  | 0  | 0 | 1       | 0           | Olfr95  |         |
| Olfr951     | 0  | 0  | 0  | 0  | 0  | 0  | 0  | 2  | 2  | 1  | 0  | 0  | 0  | 0 | 0  | 0  | 0  | 0  | 0  | 0  | 0  | 0  | 0  | 0  | 0 | 0       | 0           | Olfr951 |         |
| Olfr952     | 0  | 0  | 0  | 0  | 0  | 0  | 0  | 0  | 0  | 0  | 2  | 0  | 0  | 1 | 0  | 0  | 0  | 0  | 0  | 0  | 0  | 0  | 0  | 0  | 0 | 0       | 0           | Olfr952 |         |
| Olfr954     | 0  | 0  | 0  | 0  | 0  | 0  | 0  | 0  | 0  | 0  | 1  | 0  | 0  | 0 | 0  | 0  | 0  | 0  | 0  | 0  | 0  | 0  | 0  | 0  | 0 | 0       | 0           | Olfr954 |         |
| Olfr955     | 0  | 0  | 0  | 0  | 0  | 0  | 0  | 0  | 0  | 0  | 0  | 0  | 0  | 0 | 0  | 0  | 0  | 0  | 0  | 0  | 1  | 0  | 0  | 0  | 0 | 0       | 0           | Olfr955 |         |
| Olfr957     | 0  | 0  | 0  | 0  | 0  | 0  | 0  | 1  | 6  | 0  | 1  | 2  | 0  | 0 | 0  | 0  | 0  | 0  | 0  | 1  | 0  | 4  | 0  | 0  | 2 | 0       | 0           | Olfr957 |         |
| Olfr958     | 1  | 0  | 0  | 0  | 0  | 0  | 0  | 5  | 3  | 0  | 1  | 0  | 0  | 1 | 0  | 0  | 0  | 0  | 0  | 0  | 5  | 1  | 0  | 0  | 0 | 0       | 0           | Olfr958 |         |
| Olfr959     | 1  | 0  | 0  | 0  | 1  | 0  | 3  | 7  | 2  | 8  | 1  | 0  | 0  | 0 | 0  | 1  | 0  | 2  | 3  | 1  | 3  | 3  | 8  | 0  | 0 | 1       | 0           | Olfr959 |         |
| Olfr96      | 3  | 0  | 0  | 0  | 1  | 0  | 0  | 1  | 2  | 1  | 4  | 0  | 0  | 0 | 0  | 0  | 0  | 0  | 0  | 0  | 6  | 4  | 0  | 2  | 0 | 0       | 0           | Olfr96  |         |
| Olfr960     | 0  | 0  | 3  | 0  | 0  | 0  | 0  | 0  | 0  | 0  | 0  | 0  | 0  | 0 | 0  | 0  | 0  | 1  | 0  | 0  | 0  | 0  | 0  | 2  | 0 | 0       | 0           | Olfr960 |         |
| Olfr961     | 0  | 0  | 0  | 0  | 0  | 0  | 0  | 6  | 3  | 0  | 2  | 5  | 0  | 0 | 0  | 0  | 0  | 0  | 0  | 0  | 2  | 1  | 0  | 3  | 0 | 0       | 0           | Olfr961 |         |
| Olfr963     | 0  | 0  | 0  | 0  | 0  | 0  | 0  | 0  | 0  | 2  | 0  | 0  | 0  | 0 | 0  | 0  | 0  | 0  | 0  | 0  | 0  | 3  | 0  | 0  | 0 | 0       | 0           | Olfr963 |         |
| Olfr965     | 0  | 0  | 0  | 0  | 0  | 0  | 0  | 0  | 0  | 0  | 0  | 0  | 0  | 0 | 0  | 0  | 0  | 0  | 0  | 0  | 1  | 0  | 0  | 0  | 0 | 0       | 0           | Olfr965 |         |
| Olfr968     | 0  | 0  | 0  | 0  | 0  | 0  | 0  | 0  | 0  | 1  | 1  | 0  | 0  | 0 | 0  | 0  | 0  | 0  | 0  | 0  | 2  | 0  | 3  | 0  | 0 | 0       | 0           | Olfr968 |         |
| Olfr969     | 0  | 0  | 0  | 0  | 0  | 0  | 0  | 2  | 2  | 0  | 0  | 0  | 0  | 0 | 0  | 0  | 0  | 0  | 0  | 0  | 1  | 0  | 0  | 0  | 0 | 0       | 0           | Olfr969 |         |
| Olfr970     | 0  | 0  | 0  | 0  | 0  | 0  | 0  | 1  | 0  | 0  | 0  | 0  | 1  | 1 | 0  | 0  | 0  | 0  | 0  | 0  | 0  | 0  | 0  | 0  | 0 | 0       | 0           | Olfr970 |         |
| Olfr972     | 0  | 0  | 0  | 0  |    |    |    |    |    |    |    |    |    |   |    |    |    |    |    |    |    |    |    |    |   |         |             |         |         |





|         |       |       |       |       |       |       |       |       |       |       |       |       |       |       |       |       |       |       |       |       |       |       |       |       |       |       |       |        |        |        |
|---------|-------|-------|-------|-------|-------|-------|-------|-------|-------|-------|-------|-------|-------|-------|-------|-------|-------|-------|-------|-------|-------|-------|-------|-------|-------|-------|-------|--------|--------|--------|
| Otc     | 0     | 0     | 0     | 0     | 2     | 4     | 0     | 4     | 6     | 3     | 0     | 0     | 0     | 1     | 0     | 0     | 0     | 0     | 1     | 3     | 1     | 7     | 1     | 0     | 0     | 0     | 3     | 4      | Otc    |        |
| Otoa    | 43    | 54    | 50    | 64    | 47    | 62    | 64    | 54    | 56    | 62    | 87    | 40    | 79    | 33    | 63    | 48    | 30    | 73    | 48    | 51    | 63    | 77    | 38    | 42    | 32    | 27    | 52    | 47     | Otoa   |        |
| Otof    | 78    | 155   | 113   | 276   | 407   | 293   | 265   | 264   | 353   | 374   | 322   | 147   | 350   | 158   | 140   | 218   | 175   | 365   | 275   | 302   | 298   | 443   | 320   | 168   | 444   | 87    | 174   | 152    | Otof   |        |
| Otog    | 70    | 85    | 54    | 6     | 14    | 35    | 6     | 121   | 195   | 159   | 307   | 21    | 109   | 4     | 144   | 65    | 7     | 11    | 13    | 8     | 5     | 207   | 117   | 8     | 65    | 10    | 16    | 11     | Otog   |        |
| Otogl   | 31    | 20    | 12    | 6     | 14    | 25    | 6     | 109   | 172   | 96    | 271   | 5     | 66    | 10    | 57    | 40    | 1     | 9     | 1     | 7     | 1     | 97    | 109   | 21    | 66    | 19    | 9     | 8      | Otogl  |        |
| Otol1   | 10    | 10    | 4     | 7     | 15    | 25    | 2     | 27    | 66    | 39    | 81    | 2     | 41    | 4     | 42    | 23    | 0     | 8     | 3     | 0     | 4     | 52    | 21    | 0     | 19    | 11    | 0     | 2      | Otol1  |        |
| Otop1   | 8     | 13    | 14    | 5     | 4     | 15    | 6     | 6     | 3     | 3     | 3     | 2     | 2     | 1     | 5     | 10    | 6     | 3     | 8     | 4     | 9     | 12    | 8     | 3     | 3     | 3     | 3     | 0      | Otop1  |        |
| Otop2   | 1     | 4     | 2     | 2     | 8     | 2     | 6     | 6     | 4     | 10    | 0     | 2     | 1     | 1     | 7     | 2     | 0     | 3     | 5     | 8     | 0     | 3     | 3     | 4     | 2     | 4     | 1     | 1      | Otop2  |        |
| Otop3   | 12    | 6     | 25    | 11    | 16    | 7     | 9     | 5     | 7     | 14    | 26    | 8     | 3     | 10    | 12    | 9     | 6     | 4     | 10    | 12    | 9     | 8     | 14    | 8     | 7     | 17    | 12    | 1      | Otop3  |        |
| Otor    | 265   | 126   | 87    | 215   | 47    | 137   | 13    | 287   | 563   | 464   | 576   | 204   | 295   | 172   | 170   | 114   | 132   | 149   | 76    | 98    | 47    | 438   | 476   | 433   | 308   | 387   | 175   | 252    | Otor   |        |
| Otos    | 5     | 5     | 10    | 10    | 6     | 6     | 9     | 5     | 7     | 3     | 5     | 2     | 1     | 7     | 7     | 4     | 8     | 6     | 12    | 3     | 5     | 3     | 5     | 3     | 10    | 4     | 9     | 2      | Otos   |        |
| Otp     | 450   | 497   | 366   | 830   | 1108  | 1019  | 657   | 1766  | 1496  | 2219  | 1658  | 1880  | 2567  | 1442  | 711   | 525   | 1268  | 760   | 897   | 871   | 698   | 2949  | 1220  | 1633  | 2102  | 2620  | 1211  | 1498   | Otp    |        |
| Otub1   | 5389  | 6096  | 5831  | 5444  | 5386  | 5342  | 5475  | 7452  | 7617  | 7532  | 7014  | 8655  | 8055  | 8384  | 5515  | 5101  | 5949  | 5631  | 6082  | 6143  | 5526  | 7329  | 7172  | 7888  | 7680  | 9493  | 8832  | 8839   | Otub1  |        |
| Otub2   | 801   | 831   | 861   | 728   | 938   | 807   | 854   | 1246  | 1149  | 1291  | 1057  | 1117  | 1099  | 1055  | 818   | 808   | 853   | 825   | 953   | 842   | 827   | 1404  | 1289  | 1050  | 1255  | 1061  | 1054  | 1168   | Otub2  |        |
| Otud1   | 329   | 344   | 415   | 468   | 379   | 408   | 427   | 232   | 232   | 220   | 248   | 189   | 211   | 214   | 338   | 390   | 384   | 513   | 380   | 332   | 377   | 289   | 270   | 228   | 240   | 263   | 149   | 183    | Otud1  |        |
| Otud3   | 1123  | 1371  | 1035  | 1378  | 1125  | 1180  | 1019  | 703   | 747   | 723   | 883   | 780   | 853   | 775   | 1000  | 1231  | 1129  | 1418  | 1079  | 1061  | 1117  | 702   | 683   | 802   | 819   | 471   | 804   | 754    | Otud3  |        |
| Otud4   | 9983  | 7912  | 8360  | 9882  | 10234 | 10992 | 11307 | 10269 | 9114  | 9289  | 9636  | 11239 | 10525 | 10999 | 9835  | 9414  | 9441  | 10394 | 9644  | 9619  | 10610 | 9763  | 8613  | 9207  | 9917  | 8954  | 10854 | 10657  | Otud4  |        |
| Otud5   | 7246  | 7990  | 8037  | 7375  | 7073  | 7043  | 7108  | 7080  | 7238  | 7591  | 6837  | 7915  | 7124  | 7641  | 7151  | 6875  | 7876  | 7331  | 7767  | 6718  | 7467  | 7192  | 6983  | 7756  | 7569  | 7756  | 7160  | 7525   | Otud5  |        |
| Otud6a  | 0     | 2     | 0     | 4     | 0     | 2     | 2     | 0     | 0     | 0     | 0     | 1     | 0     | 1     | 1     | 0     | 0     | 6     | 0     | 0     | 0     | 0     | 0     | 0     | 0     | 0     | 0     | 0      | 0      | Otud6a |
| Otud6b  | 7139  | 6123  | 6537  | 5950  | 5222  | 5246  | 6319  | 5970  | 5063  | 4250  | 4525  | 4580  | 4632  | 5177  | 7516  | 6643  | 5777  | 5872  | 5192  | 6656  | 5798  | 4859  | 5160  | 4654  | 4765  | 5286  | 5062  | 5394   | Otud6b |        |
| Otud7a  | 211   | 340   | 355   | 527   | 650   | 436   | 417   | 326   | 358   | 448   | 399   | 374   | 320   | 355   | 284   | 262   | 445   | 461   | 550   | 411   | 441   | 461   | 316   | 357   | 477   | 302   | 291   | 269    | Otud7a |        |
| Otud7b  | 6159  | 5699  | 6044  | 6165  | 5083  | 5441  | 5283  | 3794  | 4056  | 4390  | 5242  | 4760  | 4942  | 4784  | 5462  | 5903  | 5829  | 5754  | 4885  | 4507  | 5095  | 3878  | 3943  | 4557  | 4282  | 4251  | 4950  | 4919   | Otud7b |        |
| Otuln   | 1732  | 1971  | 1703  | 1761  | 1357  | 1341  | 1548  | 1276  | 1224  | 1090  | 1084  | 1190  | 1116  | 1324  | 1692  | 1803  | 1651  | 1538  | 1477  | 1429  | 1477  | 1004  | 1191  | 1222  | 1126  | 1587  | 1321  | 1348   | Otuln  |        |
| Otulnl  | 942   | 811   | 905   | 755   | 628   | 694   | 686   | 487   | 470   | 383   | 436   | 370   | 336   | 365   | 960   | 989   | 710   | 687   | 655   | 671   | 605   | 421   | 551   | 445   | 349   | 465   | 343   | 329    | Otulnl |        |
| Otx1    | 2457  | 2731  | 5054  | 3321  | 2276  | 2452  | 3194  | 1981  | 1603  | 2323  | 1656  | 4769  | 3301  | 4710  | 2036  | 1716  | 3660  | 2636  | 3193  | 2476  | 2860  | 1933  | 1558  | 3553  | 2866  | 4457  | 4627  | 5289   | Otx1   |        |
| Otx2    | 5262  | 5229  | 10722 | 5962  | 4672  | 5453  | 4292  | 6464  | 3427  | 5626  | 3826  | 9643  | 8379  | 10031 | 5349  | 3455  | 7459  | 4282  | 6423  | 5483  | 5785  | 6691  | 5155  | 7236  | 6498  | 5823  | 12290 | 12728  | Otx2   |        |
| Ovca2   | 2103  | 1794  | 1721  | 1608  | 1269  | 1410  | 1465  | 1508  | 1376  | 1235  | 1225  | 1275  | 1241  | 1331  | 2029  | 1943  | 1669  | 1484  | 1372  | 1590  | 1510  | 1362  | 1437  | 1271  | 1153  | 1438  | 1362  | 1512   | Ovca2  |        |
| Ovcp1   | 922   | 1030  | 886   | 1455  | 1164  | 1045  | 1309  | 488   | 371   | 458   | 442   | 398   | 440   | 433   | 997   | 1004  | 1160  | 1436  | 1167  | 1151  | 1409  | 587   | 358   | 422   | 502   | 370   | 451   | 376    | Ovcp1  |        |
| Ovol1   | 27    | 16    | 19    | 2     | 6     | 8     | 2     | 32    | 35    | 20    | 11    | 14    | 26    | 4     | 36    | 20    | 5     | 3     | 9     | 4     | 6     | 2     | 72    | 31    | 0     | 18    | 6     | 14     | Ovol1  |        |
| Ovol2   | 42    | 22    | 27    | 19    | 7     | 14    | 12    | 20    | 18    | 25    | 21    | 9     | 7     | 7     | 20    | 33    | 29    | 12    | 9     | 23    | 8     | 8     | 34    | 8     | 6     | 15    | 5     | 5      | Ovol2  |        |
| Ovol3   | 27    | 56    | 42    | 54    | 29    | 26    | 34    | 9     | 1     | 2     | 5     | 2     | 6     | 28    | 40    | 38    | 41    | 30    | 24    | 32    | 3     | 6     | 2     | 5     | 8     | 2     | 5     | Ovol3  |        |        |
| Oxa11   | 3624  | 4005  | 3355  | 3372  | 3565  | 3557  | 3603  | 3955  | 4205  | 3930  | 3625  | 3981  | 3858  | 3892  | 3605  | 3289  | 3692  | 3267  | 3832  | 3809  | 3726  | 3750  | 4025  | 3863  | 3937  | 4194  | 3900  | 3902   | Oxa11  |        |
| Oxct1   | 17604 | 15051 | 15054 | 12910 | 14511 | 15038 | 15234 | 18795 | 17721 | 15649 | 15646 | 16944 | 15984 | 17005 | 11703 | 15264 | 14279 | 13570 | 13916 | 16486 | 14421 | 15959 | 17274 | 16029 | 15821 | 17558 | 17326 | 17302  | Oxct1  |        |
| Oxct2a  | 8     | 25    | 1     | 2     | 14    | 10    | 7     | 1     | 0     | 1     | 0     | 0     | 2     | 0     | 4     | 19    | 14    | 25    | 9     | 3     | 11    | 2     | 0     | 2     | 1     | 0     | 3     | 1      | Oxct2a |        |
| Oxct2b  | 9     | 9     | 12    | 6     | 5     | 2     | 4     | 5     | 14    | 13    | 5     | 1     | 5     | 5     | 7     | 8     | 6     | 4     | 5     | 11    | 8     | 6     | 4     | 13    | 0     | 7     | 5     | Oxct2b |        |        |
| Oxgr1   | 1     | 1     | 2     | 0     | 1     | 3     | 1     | 0     | 2     | 1     | 0     | 1     | 1     | 1     | 1     | 0     | 0     | 9     | 0     | 1     | 2     | 2     | 3     | 7     | 0     | 4     | 2     | 2      | Oxgr1  |        |
| Oxd1    | 138   | 130   | 123   | 114   | 107   | 113   | 93    | 159   | 219   | 136   | 174   | 165   | 152   | 166   | 140   | 153   | 161   | 87    | 131   | 133   | 111   | 135   | 181   | 155   | 172   | 198   | 164   | 171    | Oxd1   |        |
| Oxnd1   | 1254  | 1334  | 1414  | 1256  | 1186  | 1280  | 1288  | 1330  | 1322  | 1385  | 1279  | 1493  | 1308  | 1603  | 1279  | 1087  | 1305  | 1159  | 1277  | 1286  | 1338  | 1270  | 1212  | 1442  | 1367  | 1463  | 1542  | 1580   | Oxnd1  |        |
| Oxr1    | 6635  | 4880  | 5668  | 5106  | 5033  | 5415  | 5683  | 6268  | 5338  | 4846  | 5133  | 5172  | 4778  | 5163  | 6229  | 6061  | 5036  | 5381  | 4690  | 5633  | 4701  | 5345  | 5642  | 4886  | 4995  | 5592  | 5248  | 5172   | Oxr1   |        |
| Oxsm    | 579   | 466   | 624   | 516   | 574   | 523   | 543   | 563   | 609   | 641   | 682   | 684   | 705   | 844   | 541   | 478   | 565   | 544   | 572   | 541   | 527   | 605   | 662   | 713   | 639   | 745   | 709   | 732    | Oxsm   |        |
| Oxsr1   | 13302 | 11479 | 12073 | 12168 | 11117 | 11437 | 12037 | 7675  | 6899  | 6761  | 6597  | 7615  | 7060  | 7503  | 12676 | 11210 | 11458 | 11293 | 10841 | 11715 | 11433 | 7082  | 6403  | 7135  | 7485  | 7598  | 7671  | 7954   | Oxsr1  |        |
| Oxt     | 2     | 9     | 10    | 32    | 4     | 7     | 3     | 0     | 4     | 8     | 1     | 1     | 0     | 0     | 4     | 9     | 12    | 8     | 13    | 5     | 4     | 0     | 0     | 3     | 6     | 2     | 0     | 1      | Oxt    |        |
| Oxr     | 104   | 83    | 111   | 87    | 142   | 82    | 74    | 83    | 80    | 48    | 49    | 41    | 54    | 35    | 105   | 143   | 102   | 116   | 97    | 76    | 117   | 79    | 74    | 48    | 48    | 26    | 43    | 27     | Oxr    |        |
| P2rx1   | 52    | 37    | 68    | 28    | 24    | 43    | 16    | 53    | 46    | 27    | 62    | 39    | 68    | 39    | 45    | 69    | 27    | 34    | 19    | 41    | 19    | 33    | 49    | 56    | 29    | 67    | 65    | 52     | P2rx1  |        |
| P2rx2   | 67    | 58    | 41    | 70    | 81    | 56    | 66    | 162   | 133   | 167   | 145   | 64    | 87    | 76    | 67    | 47    | 30    | 43    | 86    | 67    | 63    | 179   | 186   | 104   | 109   | 134   | 37    | 71     | P2rx2  |        |
| P2rx3   | 498   | 689   | 169   | 133   | 1221  | 192   | 106   | 1192  | 1272  | 793   | 1360  | 148   | 1090  | 193   | 1040  | 1078  | 356   | 728   | 139   | 157   | 110   | 1623  | 834   | 111   | 806   | 151   | 229   | 225    | P2rx3  |        |
| P2rx4   | 115   | 159   | 191   | 124   | 144   | 150   | 104   | 299   | 436   | 431   | 458   | 300   | 457   | 291   | 125   | 157   | 134   | 119   | 136   | 140   | 107   | 401   | 481   | 351   | 381   | 293   | 294   | 292    | P2rx4  |        |
| P2rx5   | 8     | 10    | 23    | 11    | 20    | 16    | 21    | 13    | 31    | 41    | 72    | 13    | 16    | 4     | 15    | 14    | 16    | 35    | 14    | 12    | 15    | 22    | 61    | 20    | 25    | 19    | 14    | 11     | P2rx5  |        |
| P2rx6   | 35    | 32    | 66    | 34    | 43    | 45    | 42    | 84    | 96    | 71    | 102   | 64    | 133   | 66    | 34    | 48    | 52    | 44    | 40    | 63    | 37    | 79    | 134   | 47    | 82    | 71    | 95    | 76     | P2rx6  |        |
| P2rx7   | 81    | 130   | 91    | 131   | 242   | 158   | 94    | 352   | 355   | 308   | 350   | 169   | 379   | 184   | 146   | 161   | 165   | 190   | 132   | 138   | 157   | 129   | 413   | 339   | 188   | 304   | 137   | 231    | 179    | P2rx7  |
| P2ry1   | 708   | 560   | 713   | 572   | 551   | 567   | 510   | 404   | 454   | 421   | 522   | 499   | 472   | 417   | 571   | 795   | 645   | 643   | 493   | 606   | 553   | 538   | 507   | 422   | 428   | 475   | 475   | 412    | P2ry1  |        |
| P2ry10  | 6     | 0     | 0     | 0     | 0     | 1     | 1     | 1     | 3     | 4     | 18    | 5     | 7     | 0     | 0     | 2     | 0     | 0     | 0     | 0     | 0     | 5     | 19    | 8     | 0     | 10    | 3     | 5      | P2ry10 |        |
| P2ry10b | 28    | 3     | 13    | 30    | 47    | 32    | 18    | 76    | 82    | 41    | 180   | 53    | 60    | 38    | 22    | 2     |       |       |       |       |       |       |       |       |       |       |       |        |        |        |

|          |       |       |       |       |       |       |       |       |       |       |       |       |       |       |       |       |       |       |       |       |       |       |       |       |       |       |       |       |          |
|----------|-------|-------|-------|-------|-------|-------|-------|-------|-------|-------|-------|-------|-------|-------|-------|-------|-------|-------|-------|-------|-------|-------|-------|-------|-------|-------|-------|-------|----------|
| Pacrg    | 208   | 317   | 223   | 281   | 355   | 302   | 283   | 236   | 250   | 207   | 260   | 203   | 276   | 206   | 320   | 242   | 229   | 235   | 308   | 331   | 299   | 252   | 284   | 191   | 204   | 213   | 178   | 235   | Pacrg    |
| Pacs1    | 6037  | 6264  | 6275  | 7033  | 7706  | 6639  | 6669  | 5057  | 5735  | 5970  | 5830  | 5623  | 5218  | 5248  | 5790  | 6136  | 6720  | 7113  | 7416  | 5784  | 6957  | 7090  | 5615  | 5873  | 5898  | 5453  | 5081  | 5056  | Pacs1    |
| Pacs2    | 11274 | 12758 | 14254 | 15404 | 15403 | 14854 | 13987 | 9867  | 11416 | 13403 | 12367 | 14148 | 13177 | 12803 | 10883 | 12108 | 15238 | 15789 | 15897 | 11771 | 14754 | 14352 | 10463 | 13540 | 14592 | 12437 | 12246 | 12712 | Pacs2    |
| Pacsin1  | 805   | 901   | 956   | 1331  | 2023  | 1539  | 1409  | 860   | 1013  | 1376  | 1152  | 907   | 679   | 852   | 682   | 872   | 1367  | 1415  | 1858  | 1223  | 1541  | 1539  | 930   | 1267  | 1336  | 946   | 611   | 644   | Pacsin1  |
| Pacsin2  | 5023  | 5161  | 6724  | 5412  | 4714  | 4595  | 4403  | 2942  | 3398  | 3317  | 4058  | 3778  | 3928  | 3541  | 4758  | 5785  | 5743  | 5366  | 4736  | 3911  | 4217  | 3171  | 3667  | 3758  | 3285  | 4119  | 3764  | 3944  | Pacsin2  |
| Pacsin3  | 1414  | 1504  | 1852  | 1516  | 1510  | 1482  | 1412  | 923   | 1210  | 1169  | 1270  | 1317  | 1203  | 1331  | 1201  | 1274  | 1753  | 1531  | 1844  | 1362  | 1414  | 772   | 1168  | 1436  | 1073  | 1781  | 1377  | 1356  | Pacsin3  |
| Padi1    | 10    | 13    | 15    | 18    | 15    | 4     | 3     | 11    | 16    | 25    | 13    | 9     | 32    | 11    | 12    | 21    | 13    | 10    | 23    | 10    | 9     | 13    | 8     | 16    | 6     | 12    | 9     | 8     | Padi1    |
| Padi2    | 301   | 387   | 268   | 244   | 291   | 191   | 112   | 184   | 186   | 240   | 285   | 37    | 244   | 54    | 458   | 638   | 297   | 338   | 178   | 126   | 153   | 145   | 174   | 126   | 110   | 139   | 59    | 72    | Padi2    |
| Padi3    | 8     | 6     | 14    | 2     | 1     | 3     | 3     | 1     | 8     | 5     | 5     | 5     | 7     | 7     | 8     | 8     | 14    | 8     | 0     | 0     | 4     | 2     | 16    | 1     | 5     | 7     | 0     | 9     | Padi3    |
| Padi4    | 30    | 33    | 35    | 54    | 15    | 24    | 15    | 9     | 10    | 6     | 10    | 58    | 34    | 29    | 30    | 24    | 31    | 14    | 18    | 17    | 11    | 13    | 8     | 15    | 27    | 53    | 55    | 47    | Padi4    |
| Padi6    | 0     | 1     | 0     | 0     | 0     | 0     | 0     | 2     | 1     | 1     | 0     | 0     | 0     | 0     | 0     | 0     | 1     | 0     | 0     | 3     | 1     | 0     | 0     | 0     | 0     | 0     | 0     | 0     | Padi6    |
| Paf1     | 10322 | 11119 | 11732 | 12211 | 9356  | 9625  | 10326 | 4949  | 4637  | 5345  | 4753  | 5488  | 4932  | 5800  | 10493 | 10013 | 11145 | 11052 | 10124 | 9257  | 10060 | 5115  | 4574  | 5753  | 5337  | 5971  | 5196  | 5525  | Paf1     |
| Pafah1b1 | 24751 | 20411 | 22075 | 24728 | 29935 | 27783 | 31112 | 39449 | 31978 | 32043 | 32073 | 32350 | 32484 | 35074 | 27257 | 21390 | 24189 | 26319 | 27720 | 28980 | 29875 | 37368 | 31936 | 31331 | 36118 | 27661 | 33539 | 33495 | Pafah1b1 |
| Pafah1b2 | 20584 | 17314 | 19699 | 19589 | 21503 | 20896 | 22060 | 27196 | 21835 | 21315 | 19063 | 23232 | 20862 | 22668 | 22396 | 16992 | 20678 | 19597 | 21516 | 22715 | 21817 | 25298 | 21252 | 22238 | 23814 | 23052 | 23573 | 23830 | Pafah1b2 |
| Pafah1b3 | 4983  | 6489  | 5802  | 6708  | 6974  | 6464  | 6305  | 6996  | 6873  | 7480  | 6695  | 6894  | 6510  | 7397  | 5325  | 4645  | 6640  | 6640  | 7420  | 7228  | 7132  | 6861  | 6893  | 7959  | 8205  | 7687  | 7693  | 7312  | Pafah1b3 |
| Pafah2   | 1619  | 1878  | 1765  | 1684  | 1545  | 1523  | 1538  | 949   | 1257  | 972   | 1110  | 989   | 1238  | 904   | 1654  | 1769  | 1759  | 1641  | 1460  | 1322  | 1376  | 1078  | 1184  | 1052  | 1017  | 1080  | 996   | 967   | Pafah2   |
| Pagr1a   | 5018  | 4712  | 4281  | 7069  | 7743  | 7559  | 7633  | 3123  | 3351  | 3560  | 3855  | 3060  | 3144  | 3012  | 5370  | 5480  | 5167  | 7799  | 6629  | 5855  | 7828  | 3700  | 3212  | 3285  | 4100  | 1968  | 2869  | 2566  | Pagr1a   |
| Pah      | 0     | 1     | 5     | 0     | 0     | 0     | 0     | 0     | 0     | 1     | 0     | 0     | 0     | 2     | 0     | 2     | 0     | 0     | 1     | 0     | 1     | 2     | 1     | 0     | 2     | 1     | 0     | 0     | Pah      |
| Pah      | 3     | 7     | 13    | 3     | 0     | 4     | 2     | 4     | 0     | 3     | 0     | 2     | 8     | 11    | 8     | 6     | 2     | 3     | 4     | 1     | 3     | 3     | 1     | 1     | 0     | 0     | 7     | 9     | Pah      |
| Paics    | 32491 | 28322 | 28839 | 23762 | 19734 | 21981 | 26463 | 22150 | 19639 | 15889 | 16264 | 22752 | 19992 | 24053 | 32127 | 28931 | 26675 | 22966 | 23529 | 28791 | 23584 | 14552 | 17865 | 19398 | 17986 | 27617 | 24080 | 25497 | Paics    |
| Paip1    | 9716  | 7401  | 10394 | 10609 | 11597 | 11515 | 12729 | 15618 | 12149 | 12091 | 13668 | 14316 | 15093 | 17882 | 10334 | 7712  | 10512 | 10094 | 11817 | 5893  | 11397 | 14831 | 11958 | 15972 | 15739 | 16753 | 16014 | 18058 | Paip1    |
| Paip2    | 12453 | 10726 | 12946 | 11712 | 11273 | 11219 | 12996 | 18075 | 14243 | 14998 | 14237 | 15640 | 14785 | 16998 | 13172 | 11158 | 12896 | 11364 | 12473 | 13591 | 12970 | 16300 | 14950 | 16116 | 15039 | 15928 | 16593 | 17888 | Paip2    |
| Paip2b   | 16699 | 15095 | 14662 | 15305 | 14645 | 14866 | 16359 | 11093 | 9919  | 9157  | 8589  | 10328 | 9631  | 10423 | 16966 | 14427 | 14841 | 15649 | 16190 | 16636 | 15851 | 9277  | 9323  | 9707  | 10480 | 10995 | 10438 | 10593 | Paip2b   |
| Pak1     | 8746  | 8961  | 11159 | 9795  | 11444 | 10277 | 10575 | 13273 | 10231 | 12206 | 9501  | 12527 | 10997 | 12673 | 10152 | 7507  | 11104 | 9937  | 11357 | 10093 | 10709 | 15742 | 9872  | 11937 | 13459 | 11079 | 12305 | 13168 | Pak1     |
| Pak1ip1  | 4624  | 5349  | 4979  | 4726  | 3823  | 3553  | 4625  | 3555  | 3033  | 3038  | 2626  | 3598  | 3360  | 4041  | 4646  | 4567  | 4954  | 4328  | 4215  | 5172  | 4270  | 2777  | 2988  | 3358  | 3320  | 3915  | 3829  | 3821  | Pak1ip1  |
| Pak2     | 11297 | 9284  | 11713 | 12021 | 11669 | 11354 | 12754 | 12242 | 10706 | 11373 | 11002 | 13810 | 11923 | 14140 | 11035 | 9848  | 11798 | 11675 | 11596 | 10209 | 12574 | 12795 | 10467 | 11964 | 12951 | 12947 | 13498 | 14175 | Pak2     |
| Pak3     | 15789 | 14618 | 9654  | 17179 | 19124 | 20189 | 22502 | 19604 | 16295 | 13823 | 12558 | 15597 | 11995 | 16559 | 19507 | 13471 | 14081 | 17510 | 17993 | 23313 | 22254 | 16282 | 13050 | 12839 | 17437 | 10215 | 15186 | 14497 | Pak3     |
| Pak4     | 848   | 1088  | 1430  | 1146  | 1091  | 964   | 955   | 1315  | 1711  | 1888  | 1657  | 2219  | 1885  | 2093  | 785   | 951   | 1396  | 1108  | 1262  | 904   | 978   | 1594  | 1651  | 2309  | 1747  | 2907  | 1993  | 2169  | Pak4     |
| Pak5     | 1660  | 1790  | 1628  | 2431  | 3272  | 2675  | 2690  | 4484  | 4845  | 3720  | 3131  | 3261  | 3341  | 3325  | 2207  | 1572  | 2086  | 2380  | 2915  | 3157  | 2752  | 4764  | 3387  | 3373  | 5170  | 2555  | 2972  | 3051  | Pak5     |
| Pak6     | 346   | 432   | 288   | 852   | 1570  | 1234  | 1274  | 971   | 1321  | 1616  | 1218  | 895   | 702   | 827   | 381   | 331   | 714   | 1104  | 1519  | 1047  | 1427  | 1942  | 1137  | 1286  | 1846  | 782   | 644   | 688   | Pak6     |
| Pakap    | 7     | 7     | 6     | 9     | 9     | 5     | 7     | 1     | 4     | 12    | 4     | 7     | 16    | 6     | 11    | 11    | 14    | 9     | 8     | 2     | 5     | 10    | 3     | 13    | 12    | 24    | 12    | 14    | Pakap    |
| Pakap    | 0     | 0     | 0     | 2     | 0     | 1     | 0     | 0     | 1     | 3     | 0     | 0     | 0     | 0     | 0     | 0     | 0     | 1     | 0     | 3     | 2     | 3     | 1     | 0     | 0     | 0     | 0     | 0     | Pakap    |
| Pakap    | 59    | 41    | 16    | 56    | 178   | 115   | 84    | 259   | 314   | 271   | 296   | 104   | 164   | 117   | 74    | 60    | 36    | 81    | 95    | 85    | 111   | 358   | 277   | 157   | 250   | 18    | 130   | 84    | Pakap    |
| Palb2    | 1472  | 1301  | 1287  | 1270  | 889   | 1183  | 1134  | 1042  | 1011  | 822   | 817   | 1133  | 1034  | 1130  | 1329  | 1274  | 1250  | 1020  | 921   | 1231  | 1086  | 688   | 852   | 936   | 884   | 1142  | 1233  | 1171  | Palb2    |
| Pald1    | 3916  | 4388  | 4653  | 3812  | 3802  | 3439  | 2894  | 2319  | 2706  | 2320  | 2619  | 2492  | 3039  | 2074  | 4089  | 4956  | 4145  | 3571  | 3609  | 3354  | 2911  | 2481  | 2975  | 2221  | 2200  | 2847  | 2757  | 2295  | Pald1    |
| Palld    | 6927  | 5856  | 7280  | 5277  | 4381  | 5276  | 3846  | 5935  | 6950  | 6402  | 8598  | 6820  | 7592  | 6557  | 5806  | 6992  | 6510  | 5268  | 4796  | 3412  | 4103  | 5482  | 7843  | 7134  | 5353  | 7555  | 6826  | 6900  | Palld    |
| Palim    | 6679  | 8447  | 10331 | 11236 | 12570 | 10468 | 8595  | 7730  | 8833  | 12407 | 10327 | 12353 | 9410  | 9553  | 6401  | 7047  | 11408 | 11000 | 13303 | 8161  | 10246 | 11921 | 8748  | 12463 | 13276 | 12085 | 9761  | 9382  | Palim    |
| Palim3   | 990   | 1158  | 1613  | 1103  | 808   | 790   | 543   | 426   | 498   | 609   | 639   | 388   | 549   | 412   | 1093  | 1178  | 1216  | 1024  | 616   | 618   | 545   | 369   | 536   | 480   | 339   | 577   | 503   | 526   | Palim3   |
| Palimd   | 328   | 282   | 305   | 426   | 575   | 557   | 578   | 882   | 392   | 814   | 1317  | 811   | 803   | 839   | 371   | 282   | 404   | 449   | 584   | 656   | 669   | 874   | 1214  | 918   | 1117  | 788   | 776   | 701   | Palimd   |
| Palis1   | 6995  | 6243  | 6271  | 6400  | 5556  | 5954  | 6712  | 5069  | 4338  | 3756  | 3895  | 4537  | 4349  | 4531  | 7743  | 7063  | 6293  | 6413  | 5591  | 7059  | 5957  | 3888  | 4394  | 3947  | 3686  | 3911  | 4472  | 4475  | Palis1   |
| Palis2   | 4908  | 4214  | 5253  | 4327  | 3986  | 4343  | 4749  | 3683  | 3511  | 3429  | 3909  | 4301  | 4344  | 4265  | 4836  | 4678  | 4636  | 4406  | 4316  | 4186  | 4452  | 3479  | 3860  | 3833  | 3758  | 4586  | 4463  | 4691  | Palis2   |
| Pam      | 5253  | 4228  | 4575  | 4540  | 4896  | 4921  | 5494  | 6697  | 6842  | 6662  | 6193  | 5813  | 5264  | 6551  | 4743  | 4104  | 4465  | 4775  | 4849  | 5075  | 5323  | 6171  | 6814  | 6722  | 7099  | 5751  | 5549  | 5655  | Pam      |
| Pam16    | 884   | 1053  | 990   | 1196  | 1180  | 1065  | 1160  | 1084  | 1195  | 1155  | 1145  | 997   | 1114  | 1207  | 897   | 917   | 1057  | 929   | 1234  | 1324  | 1068  | 946   | 1082  | 1226  | 1269  | 1153  | 1232  | 1114  | Pam16    |
| Pamr1    | 174   | 188   | 201   | 186   | 225   | 305   | 112   | 244   | 395   | 338   | 1570  | 167   | 325   | 162   | 249   | 354   | 195   | 256   | 161   | 178   | 149   | 376   | 1122  | 194   | 256   | 143   | 170   | 146   | Pamr1    |
| Pan2     | 3938  | 3943  | 3756  | 3350  | 3310  | 3434  | 3550  | 6179  | 6355  | 6628  | 6234  | 8315  | 6949  | 7751  | 3578  | 3453  | 3706  | 3230  | 3671  | 3296  | 3335  | 6244  | 5824  | 7021  | 6692  | 7409  | 8283  | 7990  | Pan2     |
| Pan3     | 4050  | 3667  | 4744  | 4812  | 5016  | 4905  | 5464  | 5682  | 4814  | 5944  | 6039  | 6314  | 5757  | 6611  | 3850  | 3685  | 4636  | 4840  | 5130  | 4318  | 5199  | 6450  | 4818  | 6132  | 6283  | 5853  | 5997  | 6236  | Pan3     |
| Pank1    | 1293  | 1148  | 1484  | 1306  | 1442  | 1227  | 1446  | 1831  | 1726  | 1808  | 1667  | 2013  | 1905  | 2229  | 1274  | 1119  | 1415  | 1326  | 1506  | 1184  | 1457  | 2166  | 1741  | 2008  | 2035  | 2205  | 1912  | 2281  | Pank1    |
| Pank2    | 5592  | 4992  | 6199  | 5408  | 5038  | 5411  | 5506  | 5598  | 4672  | 5061  | 4974  | 6392  |       |       |       |       |       |       |       |       |       |       |       |       |       |       |       |       |          |

|        |       |       |       |       |       |       |       |       |       |       |       |       |       |       |       |       |       |       |       |       |       |       |       |       |       |       |       |       |        |      |
|--------|-------|-------|-------|-------|-------|-------|-------|-------|-------|-------|-------|-------|-------|-------|-------|-------|-------|-------|-------|-------|-------|-------|-------|-------|-------|-------|-------|-------|--------|------|
| Parp1  | 21665 | 24082 | 27493 | 23803 | 20248 | 21227 | 22254 | 14566 | 15823 | 17371 | 16377 | 23792 | 19560 | 23125 | 19777 | 22312 | 26259 | 21740 | 22948 | 18298 | 21340 | 14783 | 14255 | 20566 | 19153 | 26075 | 22079 | 24208 | Parp1  |      |
| Parp10 | 58    | 48    | 42    | 31    | 51    | 71    | 46    | 74    | 84    | 120   | 143   | 126   | 119   | 97    | 70    | 51    | 42    | 66    | 51    | 63    | 59    | 142   | 138   | 105   | 108   | 113   | 129   | 112   | Parp10 |      |
| Parp11 | 2753  | 2820  | 2796  | 2848  | 3326  | 3204  | 3576  | 6618  | 5652  | 5489  | 4778  | 5868  | 4994  | 5905  | 3187  | 2333  | 3195  | 2862  | 3486  | 3679  | 3589  | 6417  | 5415  | 5654  | 6129  | 5219  | 5626  | 5777  | Parp11 |      |
| Parp12 | 218   | 183   | 222   | 151   | 196   | 251   | 136   | 479   | 601   | 532   | 721   | 477   | 559   | 446   | 198   | 243   | 187   | 166   | 171   | 217   | 147   | 506   | 740   | 488   | 465   | 540   | 489   | 411   | Parp12 |      |
| Parp14 | 97    | 54    | 95    | 63    | 89    | 74    | 46    | 184   | 207   | 255   | 297   | 134   | 181   | 131   | 82    | 121   | 64    | 57    | 79    | 144   | 97    | 201   | 294   | 163   | 142   | 133   | 216   | 163   | Parp14 |      |
| Parp16 | 554   | 500   | 810   | 585   | 497   | 526   | 507   | 369   | 389   | 435   | 499   | 482   | 511   | 477   | 489   | 614   | 550   | 571   | 525   | 464   | 469   | 386   | 370   | 510   | 391   | 558   | 438   | 483   | Parp16 |      |
| Parp2  | 2162  | 1802  | 2418  | 1893  | 1943  | 1973  | 2175  | 2989  | 3211  | 3139  | 2904  | 3729  | 3214  | 3772  | 2186  | 1807  | 2067  | 1855  | 2029  | 2065  | 2027  | 2699  | 2825  | 3382  | 3006  | 4150  | 3485  | 3687  | Parp2  |      |
| Parp3  | 232   | 299   | 243   | 190   | 105   | 225   | 85    | 111   | 179   | 203   | 204   | 148   | 214   | 123   | 228   | 329   | 178   | 185   | 86    | 107   | 78    | 154   | 264   | 195   | 192   | 186   | 159   | 153   | Parp3  |      |
| Parp4  | 478   | 432   | 578   | 270   | 452   | 368   | 307   | 364   | 370   | 499   | 496   | 444   | 509   | 435   | 455   | 556   | 388   | 421   | 326   | 275   | 360   | 466   | 513   | 375   | 422   | 376   | 380   | 411   | Parp4  |      |
| Parp6  | 7074  | 7789  | 6513  | 9902  | 11508 | 10669 | 11676 | 9682  | 8473  | 9951  | 8901  | 9306  | 8096  | 9259  | 8292  | 6458  | 8772  | 10399 | 11318 | 9552  | 11970 | 12225 | 7636  | 9340  | 11028 | 8086  | 8142  | 8622  | Parp6  |      |
| Parp8  | 993   | 946   | 921   | 958   | 1483  | 1306  | 1291  | 2682  | 2583  | 2579  | 2766  | 2131  | 2076  | 2126  | 1013  | 966   | 919   | 1160  | 1319  | 1133  | 1356  | 2876  | 2468  | 2218  | 2483  | 1730  | 1909  | 1987  | Parp8  |      |
| Parp9  | 172   | 129   | 127   | 149   | 137   | 168   | 140   | 363   | 377   | 363   | 471   | 416   | 375   | 385   | 153   | 132   | 114   | 130   | 107   | 184   | 126   | 279   | 395   | 458   | 353   | 564   | 388   | 390   | Parp9  |      |
| Parppb | 1714  | 1321  | 1367  | 931   | 641   | 929   | 940   | 1420  | 1244  | 956   | 1034  | 1563  | 1348  | 1545  | 1366  | 1565  | 973   | 739   | 839   | 1121  | 846   | 774   | 1183  | 1160  | 1007  | 1565  | 1680  | 1607  | Parppb |      |
| Parp2  | 572   | 603   | 601   | 524   | 461   | 574   | 537   | 574   | 668   | 649   | 561   | 712   | 655   | 666   | 632   | 486   | 590   | 450   | 543   | 549   | 563   | 506   | 674   | 649   | 643   | 790   | 760   | 689   | Parp2  |      |
| Parva  | 9054  | 7763  | 7502  | 5679  | 4583  | 5936  | 4437  | 9110  | 10415 | 9365  | 10535 | 9581  | 10350 | 8986  | 8450  | 9170  | 6412  | 6008  | 4453  | 4068  | 4398  | 8585  | 11672 | 10031 | 7174  | 11453 | 9393  | 10011 | Parva  |      |
| Parvb  | 1481  | 1876  | 2794  | 1732  | 2135  | 1629  | 1210  | 1618  | 1778  | 2177  | 2244  | 2160  | 2642  | 2091  | 1652  | 2345  | 2154  | 1819  | 1581  | 1178  | 1586  | 2777  | 1724  | 1869  | 2218  | 2102  | 2328  | 2533  | Parvb  |      |
| Parvg  | 106   | 130   | 163   | 123   | 105   | 95    | 61    | 79    | 93    | 96    | 119   | 68    | 95    | 66    | 107   | 185   | 129   | 119   | 92    | 75    | 75    | 67    | 129   | 97    | 93    | 64    | 101   | 89    | Parvg  |      |
| Parv   | 4209  | 3978  | 3304  | 3253  | 2748  | 3401  | 3396  | 2523  | 2705  | 2514  | 2351  | 3447  | 3149  | 3621  | 3518  | 3653  | 3423  | 2983  | 3285  | 3266  | 3130  | 2025  | 2465  | 2602  | 2637  | 3145  | 3729  | 3646  | Parv   |      |
| Pate1  | 0     | 0     | 0     | 0     | 0     | 0     | 0     | 0     | 0     | 2     | 0     | 0     | 0     | 0     | 0     | 0     | 0     | 0     | 0     | 0     | 0     | 0     | 0     | 0     | 0     | 0     | 0     | 0     | Pate1  |      |
| Pate10 | 0     | 1     | 0     | 1     | 3     | 3     | 3     | 4     | 1     | 0     | 1     | 0     | 2     | 1     | 0     | 1     | 1     | 8     | 6     | 0     | 2     | 0     | 1     | 0     | 1     | 0     | 0     | 0     | Pate10 |      |
| Pate13 | 0     | 0     | 0     | 0     | 1     | 3     | 0     | 1     | 0     | 0     | 1     | 0     | 0     | 3     | 4     | 0     | 0     | 0     | 0     | 2     | 2     | 0     | 3     | 0     | 0     | 4     | 0     | 0     | Pate13 |      |
| Pate14 | 0     | 0     | 0     | 0     | 0     | 0     | 0     | 0     | 0     | 0     | 0     | 0     | 0     | 0     | 0     | 0     | 0     | 0     | 0     | 0     | 0     | 0     | 0     | 0     | 0     | 0     | 1     | 0     | Pate14 |      |
| Pate2  | 296   | 282   | 263   | 208   | 220   | 256   | 277   | 210   | 207   | 172   | 146   | 203   | 215   | 229   | 302   | 245   | 277   | 196   | 259   | 272   | 234   | 152   | 181   | 203   | 135   | 189   | 246   | 221   | Pate2  |      |
| Pate3  | 0     | 0     | 0     | 0     | 0     | 0     | 0     | 0     | 0     | 3     | 0     | 0     | 0     | 0     | 0     | 0     | 0     | 0     | 0     | 0     | 0     | 0     | 0     | 0     | 0     | 0     | 1     | 0     | Pate3  |      |
| Patj   | 1057  | 949   | 780   | 691   | 755   | 857   | 723   | 1813  | 2174  | 1849  | 2007  | 1678  | 1980  | 1800  | 947   | 980   | 754   | 735   | 715   | 767   | 733   | 1594  | 2214  | 1785  | 1586  | 1770  | 1684  | 1756  | Patj   |      |
| Pat1   | 4944  | 5186  | 5371  | 5980  | 4989  | 4793  | 5439  | 4745  | 4481  | 4891  | 4506  | 5579  | 5029  | 5776  | 4970  | 5120  | 5358  | 5810  | 4999  | 4471  | 5373  | 5412  | 4396  | 5071  | 5084  | 5538  | 5089  | 5695  | Pat1   |      |
| Pat2   | 1     | 1     | 2     | 0     | 0     | 1     | 0     | 0     | 2     | 0     | 1     | 3     | 1     | 1     | 3     | 1     | 1     | 0     | 0     | 0     | 0     | 2     | 1     | 0     | 4     | 0     | 2     | 2     | Pat2   |      |
| Pat21  | 3196  | 3264  | 3911  | 3552  | 4193  | 3880  | 3655  | 6735  | 6561  | 7599  | 6772  | 9269  | 8046  | 8913  | 3140  | 2979  | 4091  | 3488  | 4408  | 3532  | 3902  | 7765  | 6220  | 8311  | 8250  | 9994  | 8861  | 9646  | Pat21  |      |
| Pawr   | 1691  | 1469  | 1982  | 1721  | 1315  | 1568  | 1469  | 720   | 596   | 603   | 509   | 679   | 781   | 743   | 719   | 1667  | 1558  | 1842  | 1576  | 1517  | 1499  | 1398  | 436   | 586   | 838   | 610   | 1167  | 738   | 854    | Pawr |
| Pax1   | 1016  | 334   | 104   | 121   | 93    | 241   | 11    | 724   | 1489  | 776   | 1061  | 330   | 671   | 309   | 425   | 538   | 206   | 259   | 37    | 31    | 12    | 319   | 1078  | 589   | 287   | 463   | 237   | 262   | Pax1   |      |
| Pax2   | 77    | 155   | 94    | 119   | 1088  | 158   | 29    | 471   | 630   | 1051  | 1036  | 88    | 785   | 38    | 294   | 252   | 180   | 176   | 78    | 73    | 33    | 976   | 632   | 54    | 143   | 93    | 42    | 27    | Pax2   |      |
| Pax3   | 2064  | 1909  | 3436  | 2308  | 1667  | 1663  | 685   | 2765  | 1583  | 2484  | 1440  | 2068  | 3679  | 2266  | 2010  | 2718  | 3201  | 1492  | 1584  | 1302  | 1366  | 2087  | 2172  | 2389  | 1727  | 1293  | 2836  | 3010  | Pax3   |      |
| Pax4   | 0     | 0     | 0     | 0     | 0     | 5     | 0     | 4     | 1     | 0     | 0     | 1     | 0     | 3     | 0     | 0     | 0     | 0     | 0     | 0     | 0     | 0     | 6     | 2     | 0     | 0     | 0     | 0     | Pax4   |      |
| Pax5   | 1523  | 1792  | 2774  | 2837  | 2463  | 2844  | 777   | 1793  | 1411  | 2004  | 1596  | 3129  | 4240  | 1961  | 1458  | 2501  | 3121  | 2374  | 3239  | 1907  | 2295  | 2966  | 805   | 1994  | 2893  | 63    | 3258  | 2219  | Pax5   |      |
| Pax6   | 6384  | 6683  | 8301  | 7404  | 5974  | 7069  | 9268  | 5964  | 5183  | 5841  | 4324  | 8795  | 5235  | 9470  | 6331  | 3789  | 7205  | 6401  | 8055  | 7830  | 7492  | 4223  | 4066  | 7793  | 7134  | 10717 | 8477  | 9620  | Pax6   |      |
| Pax7   | 646   | 558   | 1427  | 1094  | 1028  | 1009  | 443   | 1463  | 899   | 1836  | 1339  | 1721  | 2122  | 1441  | 487   | 871   | 1279  | 809   | 1367  | 790   | 1004  | 2015  | 1101  | 2084  | 1990  | 770   | 1478  | 1651  | Pax7   |      |
| Pax8   | 98    | 111   | 128   | 94    | 518   | 129   | 28    | 335   | 404   | 440   | 475   | 152   | 557   | 65    | 272   | 224   | 117   | 162   | 132   | 87    | 80    | 403   | 333   | 85    | 128   | 9     | 146   | 80    | Pax8   |      |
| Pax9   | 574   | 130   | 52    | 186   | 56    | 29    | 18    | 915   | 728   | 897   | 722   | 7     | 60    | 23    | 117   | 516   | 75    | 73    | 10    | 12    | 8     | 234   | 678   | 713   | 36    | 1099  | 34    | 7     | Pax9   |      |
| Paxbp1 | 14141 | 11574 | 10625 | 12361 | 12952 | 14169 | 14941 | 15663 | 12817 | 12942 | 13447 | 14202 | 13199 | 14751 | 13992 | 12364 | 11282 | 12553 | 12272 | 14101 | 14761 | 14302 | 12628 | 12654 | 13690 | 11710 | 13974 | 12978 | Paxbp1 |      |
| Paxip1 | 5509  | 5859  | 5364  | 5749  | 5302  | 5448  | 5387  | 4484  | 4639  | 4690  | 4508  | 5856  | 5173  | 5460  | 4944  | 5423  | 5836  | 5478  | 5857  | 4970  | 5397  | 4336  | 4286  | 5247  | 4827  | 5930  | 5703  | 5550  | Paxip1 |      |
| Paxx   | 533   | 625   | 565   | 715   | 1049  | 853   | 831   | 927   | 1047  | 1062  | 1121  | 1070  | 902   | 942   | 555   | 519   | 656   | 757   | 831   | 784   | 826   | 1240  | 1056  | 1042  | 1236  | 872   | 953   | 828   | Paxx   |      |
| Pbd1   | 3434  | 3257  | 3725  | 3009  | 2344  | 2315  | 2920  | 2678  | 2273  | 2116  | 2162  | 2673  | 2685  | 3002  | 4158  | 3794  | 3972  | 2922  | 2833  | 3772  | 3092  | 2593  | 3016  | 3348  | 2792  | 4683  | 4104  | 4486  | Pbd1   |      |
| Pbk    | 4570  | 3715  | 4962  | 3638  | 2928  | 3717  | 4529  | 5078  | 4397  | 4048  | 3577  | 6857  | 5305  | 7280  | 4556  | 3626  | 4357  | 3349  | 4126  | 4365  | 3904  | 3322  | 3580  | 5701  | 5150  | 7854  | 6933  | 7444  | Pbk    |      |
| Pbid1  | 24    | 38    | 12    | 33    | 45    | 41    | 22    | 12    | 21    | 5     | 28    | 13    | 11    | 13    | 26    | 25    | 35    | 30    | 34    | 27    | 43    | 27    | 19    | 18    | 25    | 22    | 31    | 8     | Pbid1  |      |
| Pbid2  | 98    | 99    | 89    | 163   | 99    | 79    | 93    | 106   | 109   | 184   | 139   | 127   | 127   | 139   | 104   | 118   | 107   | 113   | 124   | 106   | 105   | 132   | 139   | 146   | 127   | 177   | 148   | 123   | Pbid2  |      |
| Pbp2   | 1     | 0     | 0     | 0     | 0     | 0     | 0     | 0     | 2     | 3     | 2     | 0     | 0     | 0     | 0     | 0     | 1     | 0     | 0     | 2     | 0     | 1     | 0     | 0     | 0     | 0     | 0     | 1     | Pbp2   |      |
| Pbrm1  | 11726 | 9631  | 8641  | 9232  | 10637 | 12290 | 11364 | 22666 | 20534 | 19163 | 20197 | 23661 | 22416 | 23812 | 11780 | 10489 | 9312  | 9250  | 10227 | 11474 | 11449 | 18783 | 20035 | 18309 | 21422 | 15759 | 25400 | 23260 | Pbrm1  |      |
| Pbx1   | 22758 | 19593 | 18363 | 23284 | 23805 | 25314 | 27336 | 30337 | 27414 | 26350 | 25839 | 28760 | 26525 | 29766 | 22400 | 19156 | 21489 | 22394 | 25593 | 24145 | 27554 | 29604 | 24654 | 28714 | 31848 | 22884 | 29230 | 29265 | Pbx1   |      |
| Pbx2   | 5852  | 6374  | 7851  | 5502  | 5083  | 5229  | 5108  | 7552  | 7629  | 8231  | 7883  | 10627 | 9331  | 10702 | 5326  | 5552  | 6757  | 5043  | 5686  | 4777  | 5252  | 7454  | 7288  | 9707  | 8317  | 12630 | 11087 | 11703 | Pbx2   |      |
| Pbx3   | 5577  | 6805  | 6674  | 8992  | 10028 | 8990  | 7518  | 10367 | 8745  | 11008 | 9071  | 8767  | 10204 | 8813  | 7692  | 6315  | 9065  | 8685  | 8533  | 8251  | 81    |       |       |       |       |       |       |       |        |      |

|          |      |      |      |      |      |      |      |      |      |      |      |      |      |      |      |      |      |      |      |      |      |      |      |      |      |      |      |         |          |
|----------|------|------|------|------|------|------|------|------|------|------|------|------|------|------|------|------|------|------|------|------|------|------|------|------|------|------|------|---------|----------|
| Pcdha4   | 0    | 0    | 0    | 1    | 0    | 0    | 0    | 2    | 1    | 0    | 0    | 1    | 0    | 2    | 0    | 0    | 0    | 0    | 3    | 0    | 0    | 0    | 0    | 0    | 3    | 0    | 0    | 2       | Pcdha4   |
| Pcdha5   | 20   | 29   | 25   | 29   | 121  | 82   | 84   | 126  | 182  | 164  | 160  | 89   | 104  | 106  | 62   | 39   | 54   | 75   | 75   | 76   | 83   | 224  | 164  | 123  | 206  | 71   | 101  | 87      | Pcdha5   |
| Pcdha6   | 24   | 27   | 25   | 38   | 110  | 89   | 76   | 145  | 143  | 147  | 101  | 73   | 74   | 84   | 36   | 37   | 59   | 57   | 61   | 114  | 74   | 175  | 153  | 67   | 138  | 33   | 62   | 55      | Pcdha6   |
| Pcdha7   | 38   | 59   | 27   | 64   | 124  | 100  | 114  | 128  | 192  | 148  | 189  | 122  | 110  | 111  | 59   | 43   | 48   | 92   | 82   | 100  | 108  | 289  | 188  | 161  | 217  | 57   | 99   | 63      | Pcdha7   |
| Pcdha8   | 2    | 4    | 0    | 0    | 6    | 12   | 8    | 24   | 11   | 13   | 27   | 23   | 5    | 11   | 7    | 5    | 13   | 3    | 9    | 12   | 20   | 20   | 14   | 11   | 19   | 13   | 13   | 7       | Pcdha8   |
| Pcdha9   | 50   | 61   | 32   | 93   | 160  | 175  | 123  | 204  | 226  | 181  | 213  | 117  | 150  | 143  | 73   | 46   | 78   | 96   | 135  | 140  | 128  | 257  | 177  | 133  | 253  | 56   | 117  | 96      | Pcdha9   |
| Pcdhac1  | 83   | 113  | 60   | 122  | 174  | 166  | 162  | 155  | 155  | 146  | 108  | 111  | 70   | 134  | 120  | 107  | 74   | 129  | 159  | 152  | 191  | 102  | 96   | 162  | 138  | 96   | 72   | 72      | Pcdhac1  |
| Pcdhac2  | 468  | 442  | 319  | 547  | 790  | 705  | 681  | 541  | 672  | 622  | 493  | 452  | 353  | 440  | 349  | 307  | 370  | 605  | 739  | 627  | 695  | 480  | 572  | 518  | 649  | 316  | 306  | 332     | Pcdhac2  |
| Pcdhb1   | 5    | 0    | 0    | 5    | 2    | 0    | 0    | 15   | 7    | 5    | 18   | 0    | 0    | 0    | 1    | 2    | 1    | 0    | 0    | 0    | 0    | 0    | 9    | 13   | 0    | 5    | 0    | 1       | Pcdhb1   |
| Pcdhb10  | 42   | 30   | 60   | 42   | 81   | 60   | 42   | 158  | 183  | 180  | 162  | 125  | 141  | 113  | 46   | 39   | 50   | 56   | 54   | 43   | 68   | 172  | 219  | 146  | 214  | 107  | 117  | 125     | Pcdhb10  |
| Pcdhb11  | 43   | 48   | 36   | 51   | 139  | 86   | 88   | 201  | 213  | 183  | 221  | 129  | 130  | 142  | 57   | 40   | 54   | 85   | 75   | 146  | 70   | 328  | 333  | 151  | 189  | 118  | 85   | 155     | Pcdhb11  |
| Pcdhb12  | 18   | 21   | 23   | 42   | 32   | 33   | 37   | 118  | 120  | 83   | 95   | 43   | 88   | 77   | 25   | 20   | 22   | 37   | 36   | 63   | 46   | 139  | 121  | 104  | 142  | 75   | 72   | 52      | Pcdhb12  |
| Pcdhb13  | 10   | 14   | 15   | 4    | 61   | 45   | 19   | 70   | 85   | 78   | 105  | 34   | 41   | 59   | 20   | 18   | 21   | 34   | 30   | 32   | 26   | 122  | 84   | 75   | 89   | 41   | 62   | 28      | Pcdhb13  |
| Pcdhb14  | 43   | 40   | 43   | 77   | 93   | 79   | 48   | 200  | 213  | 172  | 212  | 101  | 137  | 100  | 73   | 47   | 54   | 57   | 61   | 90   | 70   | 244  | 267  | 136  | 178  | 123  | 91   | 112     | Pcdhb14  |
| Pcdhb15  | 28   | 16   | 13   | 22   | 32   | 30   | 27   | 115  | 156  | 113  | 112  | 76   | 76   | 100  | 41   | 26   | 28   | 28   | 45   | 49   | 51   | 99   | 178  | 69   | 98   | 52   | 83   | 46      | Pcdhb15  |
| Pcdhb16  | 89   | 79   | 45   | 68   | 125  | 170  | 143  | 531  | 577  | 310  | 374  | 202  | 234  | 245  | 145  | 99   | 73   | 107  | 91   | 197  | 152  | 409  | 568  | 204  | 372  | 105  | 282  | 199     | Pcdhb16  |
| Pcdhb17  | 138  | 151  | 146  | 221  | 409  | 270  | 245  | 832  | 849  | 679  | 798  | 487  | 595  | 592  | 243  | 157  | 196  | 295  | 288  | 404  | 318  | 1014 | 890  | 657  | 797  | 426  | 479  | 551     | Pcdhb17  |
| Pcdhb18  | 90   | 75   | 47   | 77   | 208  | 193  | 124  | 496  | 425  | 314  | 332  | 191  | 245  | 186  | 121  | 86   | 124  | 87   | 131  | 175  | 175  | 473  | 446  | 249  | 301  | 198  | 220  | 191     | Pcdhb18  |
| Pcdhb19  | 157  | 162  | 59   | 178  | 371  | 325  | 230  | 891  | 945  | 705  | 774  | 411  | 567  | 473  | 245  | 203  | 114  | 213  | 247  | 334  | 329  | 825  | 891  | 449  | 851  | 198  | 487  | 420     | Pcdhb19  |
| Pcdhb20  | 38   | 25   | 20   | 53   | 70   | 41   | 51   | 182  | 176  | 226  | 151  | 86   | 100  | 144  | 47   | 30   | 22   | 48   | 48   | 54   | 67   | 120  | 155  | 99   | 188  | 33   | 114  | 91      | Pcdhb20  |
| Pcdhb21  | 105  | 109  | 89   | 203  | 366  | 239  | 219  | 623  | 629  | 688  | 618  | 368  | 443  | 411  | 182  | 141  | 151  | 295  | 290  | 258  | 290  | 906  | 646  | 585  | 740  | 401  | 342  | 463     | Pcdhb21  |
| Pcdhb22  | 70   | 75   | 24   | 71   | 115  | 142  | 75   | 341  | 311  | 265  | 236  | 128  | 222  | 147  | 102  | 86   | 45   | 69   | 60   | 122  | 128  | 227  | 359  | 132  | 301  | 51   | 157  | 139     | Pcdhb22  |
| Pcdhb23  | 216  | 190  | 226  | 311  | 496  | 422  | 288  | 677  | 712  | 697  | 822  | 427  | 562  | 490  | 281  | 287  | 234  | 390  | 335  | 408  | 358  | 1041 | 821  | 649  | 705  | 469  | 545  | 457     | Pcdhb23  |
| Pcdhb3   | 60   | 72   | 63   | 77   | 132  | 110  | 104  | 315  | 306  | 311  | 340  | 200  | 240  | 222  | 113  | 69   | 93   | 113  | 130  | 109  | 116  | 421  | 366  | 264  | 319  | 219  | 246  | 235     | Pcdhb3   |
| Pcdhb4   | 103  | 93   | 52   | 95   | 122  | 90   | 110  | 319  | 346  | 306  | 187  | 204  | 256  | 213  | 103  | 50   | 65   | 99   | 77   | 169  | 112  | 354  | 276  | 302  | 259  | 161  | 235  | 236     | Pcdhb4   |
| Pcdhb5   | 93   | 84   | 61   | 96   | 198  | 145  | 145  | 358  | 410  | 323  | 281  | 222  | 362  | 305  | 107  | 93   | 67   | 123  | 147  | 119  | 177  | 443  | 340  | 309  | 352  | 222  | 268  | 249     | Pcdhb5   |
| Pcdhb6   | 53   | 57   | 37   | 48   | 79   | 61   | 68   | 195  | 267  | 183  | 190  | 90   | 133  | 133  | 45   | 62   | 61   | 55   | 61   | 94   | 57   | 219  | 254  | 146  | 195  | 116  | 162  | 117     | Pcdhb6   |
| Pcdhb7   | 170  | 129  | 132  | 195  | 363  | 299  | 275  | 808  | 732  | 598  | 590  | 506  | 409  | 515  | 210  | 145  | 188  | 266  | 270  | 340  | 320  | 715  | 647  | 575  | 640  | 429  | 403  | 462     | Pcdhb7   |
| Pcdhb8   | 89   | 54   | 62   | 70   | 106  | 112  | 101  | 380  | 298  | 249  | 282  | 200  | 181  | 198  | 92   | 70   | 81   | 74   | 103  | 138  | 136  | 346  | 334  | 311  | 296  | 202  | 223  | 201     | Pcdhb8   |
| Pcdhb9   | 70   | 59   | 53   | 86   | 154  | 102  | 99   | 348  | 409  | 306  | 312  | 193  | 242  | 206  | 99   | 53   | 63   | 102  | 135  | 131  | 130  | 434  | 394  | 278  | 340  | 191  | 214  | 178     | Pcdhb9   |
| Pcdhga1  | 150  | 129  | 138  | 160  | 253  | 161  | 170  | 297  | 367  | 361  | 325  | 247  | 243  | 248  | 174  | 149  | 108  | 156  | 165  | 189  | 177  | 326  | 326  | 256  | 228  | 151  | 238  | 196     | Pcdhga1  |
| Pcdhga10 | 314  | 390  | 381  | 385  | 488  | 397  | 339  | 491  | 616  | 673  | 623  | 613  | 695  | 634  | 380  | 357  | 424  | 468  | 499  | 365  | 383  | 749  | 679  | 652  | 705  | 539  | 605  | 638     | Pcdhga10 |
| Pcdhga11 | 480  | 530  | 449  | 590  | 819  | 607  | 731  | 1045 | 1118 | 1361 | 1219 | 1295 | 1245 | 1359 | 509  | 478  | 571  | 657  | 711  | 640  | 823  | 1612 | 1117 | 1352 | 1603 | 1117 | 1191 | 1272    | Pcdhga11 |
| Pcdhga12 | 322  | 360  | 563  | 608  | 704  | 535  | 580  | 548  | 702  | 975  | 842  | 1075 | 818  | 841  | 324  | 394  | 685  | 642  | 778  | 464  | 674  | 1009 | 590  | 1133 | 1095 | 980  | 779  | 845     | Pcdhga12 |
| Pcdhga2  | 366  | 408  | 474  | 466  | 711  | 615  | 486  | 573  | 714  | 741  | 760  | 633  | 827  | 627  | 385  | 456  | 431  | 612  | 526  | 442  | 470  | 924  | 685  | 561  | 755  | 408  | 580  | 593     | Pcdhga2  |
| Pcdhga3  | 438  | 469  | 458  | 528  | 731  | 800  | 573  | 708  | 822  | 853  | 857  | 722  | 857  | 685  | 527  | 503  | 430  | 514  | 553  | 469  | 592  | 1063 | 833  | 688  | 904  | 561  | 758  | 682     | Pcdhga3  |
| Pcdhga4  | 164  | 203  | 180  | 248  | 266  | 273  | 253  | 335  | 368  | 374  | 394  | 428  | 440  | 367  | 187  | 185  | 172  | 242  | 341  | 211  | 285  | 493  | 349  | 385  | 424  | 251  | 354  | 295     | Pcdhga4  |
| Pcdhga5  | 388  | 411  | 347  | 419  | 520  | 456  | 415  | 473  | 540  | 628  | 583  | 590  | 505  | 552  | 330  | 347  | 355  | 375  | 474  | 364  | 461  | 645  | 511  | 555  | 558  | 415  | 540  | 500     | Pcdhga5  |
| Pcdhga6  | 226  | 253  | 176  | 268  | 377  | 311  | 292  | 518  | 498  | 428  | 569  | 544  | 399  | 536  | 258  | 216  | 240  | 315  | 365  | 329  | 345  | 602  | 618  | 574  | 696  | 397  | 453  | 483     | Pcdhga6  |
| Pcdhga7  | 354  | 419  | 328  | 456  | 542  | 505  | 491  | 669  | 640  | 756  | 821  | 620  | 776  | 678  | 406  | 403  | 402  | 468  | 440  | 369  | 545  | 956  | 778  | 778  | 787  | 588  | 730  | 646     | Pcdhga7  |
| Pcdhga8  | 212  | 215  | 249  | 293  | 330  | 291  | 296  | 347  | 370  | 434  | 369  | 399  | 432  | 396  | 200  | 341  | 335  | 295  | 365  | 365  | 543  | 375  | 383  | 458  | 247  | 381  | 320  | Pcdhga8 |          |
| Pcdhga9  | 180  | 215  | 199  | 227  | 301  | 320  | 201  | 308  | 370  | 448  | 397  | 374  | 361  | 343  | 220  | 194  | 248  | 291  | 274  | 236  | 275  | 556  | 362  | 455  | 498  | 373  | 409  | 387     | Pcdhga9  |
| Pcdhgb1  | 171  | 174  | 147  | 216  | 277  | 360  | 245  | 303  | 410  | 438  | 447  | 416  | 388  | 319  | 183  | 138  | 190  | 223  | 217  | 220  | 265  | 495  | 364  | 320  | 389  | 209  | 332  | 292     | Pcdhgb1  |
| Pcdhgb2  | 308  | 300  | 242  | 350  | 421  | 389  | 332  | 477  | 505  | 641  | 511  | 592  | 577  | 461  | 285  | 266  | 290  | 337  | 372  | 291  | 372  | 642  | 432  | 555  | 572  | 455  | 452  | 457     | Pcdhgb2  |
| Pcdhgb4  | 333  | 277  | 265  | 272  | 255  | 344  | 272  | 299  | 434  | 517  | 496  | 449  | 466  | 456  | 295  | 217  | 256  | 283  | 282  | 258  | 277  | 444  | 424  | 459  | 472  | 317  | 400  | 318     | Pcdhgb4  |
| Pcdhgb5  | 268  | 303  | 278  | 322  | 430  | 437  | 345  | 462  | 526  | 611  | 582  | 547  | 524  | 603  | 305  | 236  | 362  | 420  | 432  | 328  | 387  | 715  | 560  | 626  | 599  | 494  | 644  | 598     | Pcdhgb5  |
| Pcdhgb6  | 607  | 655  | 678  | 862  | 1186 | 914  | 866  | 1088 | 1230 | 1489 | 1513 | 1410 | 1338 | 1198 | 628  | 694  | 797  | 924  | 1057 | 718  | 939  | 1693 | 1274 | 1509 | 1478 | 1189 | 1039 | 1243    | Pcdhgb6  |
| Pcdhgb7  | 374  | 338  | 367  | 412  | 538  | 502  | 421  | 646  | 769  | 793  | 766  | 841  | 618  | 679  | 404  | 396  | 397  | 478  | 474  | 344  | 444  | 844  | 750  | 721  | 830  | 657  | 614  | 553     | Pcdhgb7  |
| Pcdhgc3  | 5505 | 6344 | 7139 | 8502 | 9218 | 7424 | 7348 | 4498 | 5365 | 6861 | 6316 | 5828 | 4986 | 4921 | 5054 | 5952 | 7599 | 8615 | 9028 | 5749 | 8023 | 6184 | 5429 | 6299 | 6223 | 5475 | 4392 | 4405    | Pcdhgc3  |
| Pcdhgc4  | 781  | 942  | 781  | 1538 | 1803 | 1389 | 1373 | 860  | 976  | 1130 | 1025 | 770  | 764  | 767  | 778  | 859  | 1036 | 1467 | 1523 | 1178 | 1544 | 1337 | 887  | 947  | 1293 | 583  | 664  | 675     | Pcdhgc4  |
| Pcdhgc5  | 158  | 194  | 179  | 292  | 376  | 310  | 286  | 258  | 302  | 333  | 372  | 419  | 348  | 313  | 166  | 191  | 316  | 328  | 358  | 218  | 286  | 439  | 284  | 363  | 503  | 202  | 329  | 277     | Pcdhgc5  |
| Pcd1a    | 707  | 871  | 832  | 828  | 947  | 843  | 865  | 1627 | 1912 | 2011 | 1931 | 1778 | 1845 | 185  |      |      |      |      |      |      |      |      |      |      |      |      |      |         |          |



|         |       |       |       |       |       |       |       |       |       |       |       |       |       |       |       |       |       |       |       |       |       |       |       |       |       |       |       |       |
|---------|-------|-------|-------|-------|-------|-------|-------|-------|-------|-------|-------|-------|-------|-------|-------|-------|-------|-------|-------|-------|-------|-------|-------|-------|-------|-------|-------|-------|
| Pcp4    | 17    | 21    | 2     | 30    | 80    | 39    | 69    | 56    | 33    | 80    | 33    | 23    | 25    | 39    | 40    | 8     | 24    | 29    | 16    | 44    | 104   | 52    | 46    | 69    | 43    | 22    | 8     | 33    |
| Pcp4l1  | 1637  | 1926  | 2366  | 1651  | 1482  | 1401  | 1081  | 614   | 655   | 724   | 524   | 756   | 1074  | 456   | 1598  | 2174  | 1807  | 1396  | 1386  | 1387  | 1151  | 787   | 972   | 522   | 419   | 522   | 592   | 674   |
| Pcsk1   | 281   | 291   | 259   | 358   | 565   | 389   | 446   | 332   | 306   | 308   | 224   | 209   | 193   | 187   | 410   | 291   | 322   | 307   | 359   | 517   | 387   | 404   | 265   | 155   | 232   | 174   | 187   | 190   |
| Pcsk1n  | 1046  | 1653  | 1583  | 2441  | 2860  | 1785  | 1688  | 1542  | 1441  | 2280  | 1941  | 1637  | 1446  | 1391  | 1280  | 992   | 2095  | 2222  | 2649  | 1874  | 1942  | 2791  | 1588  | 1832  | 2294  | 1265  | 1273  | 1264  |
| Pcsk2   | 1655  | 2205  | 1858  | 2642  | 3523  | 2972  | 2820  | 2179  | 1638  | 2103  | 1783  | 1781  | 1762  | 1707  | 2300  | 1717  | 2392  | 2612  | 3337  | 3500  | 3425  | 2938  | 2007  | 1735  | 2512  | 970   | 1847  | 1754  |
| Pcsk4   | 228   | 333   | 429   | 361   | 281   | 221   | 235   | 99    | 115   | 144   | 142   | 134   | 153   | 100   | 223   | 273   | 380   | 352   | 295   | 242   | 173   | 125   | 123   | 131   | 112   | 186   | 102   | 95    |
| Pcsk5   | 1927  | 1600  | 1603  | 1206  | 1010  | 1490  | 943   | 1664  | 1574  | 1639  | 2167  | 1605  | 1877  | 1592  | 1713  | 2131  | 1296  | 1369  | 923   | 891   | 859   | 1619  | 2041  | 1579  | 1467  | 1880  | 1766  | 1787  |
| Pcsk6   | 555   | 555   | 512   | 449   | 397   | 541   | 374   | 669   | 924   | 893   | 1191  | 770   | 854   | 741   | 571   | 639   | 385   | 519   | 442   | 443   | 422   | 493   | 1001  | 933   | 603   | 980   | 623   | 873   |
| Pcsk7   | 3280  | 3861  | 2668  | 3190  | 2950  | 3199  | 2876  | 2518  | 2642  | 2565  | 2501  | 2518  | 2652  | 2566  | 3212  | 3523  | 2877  | 3147  | 2869  | 3085  | 2857  | 2533  | 2422  | 2449  | 2827  | 2197  | 2797  | 2461  |
| Pcsk9   | 209   | 231   | 269   | 155   | 182   | 170   | 166   | 100   | 120   | 96    | 130   | 207   | 229   | 203   | 191   | 208   | 217   | 145   | 184   | 209   | 126   | 90    | 155   | 153   | 143   | 381   | 256   | 282   |
| Pcpt    | 836   | 892   | 1055  | 602   | 465   | 449   | 487   | 358   | 344   | 269   | 292   | 388   | 454   | 448   | 742   | 854   | 823   | 490   | 473   | 515   | 426   | 206   | 297   | 356   | 225   | 615   | 517   | 538   |
| Pcx     | 3513  | 4257  | 3630  | 3413  | 3103  | 3115  | 2549  | 1722  | 2296  | 2057  | 2155  | 2170  | 2337  | 1983  | 3123  | 4266  | 3355  | 3498  | 3085  | 2462  | 2940  | 1893  | 2307  | 2130  | 2115  | 2386  | 2148  | 1990  |
| Pcyox1  | 12412 | 12608 | 13174 | 11794 | 11073 | 11911 | 11283 | 8994  | 8574  | 9115  | 8891  | 10151 | 9601  | 9724  | 12676 | 12361 | 11874 | 11766 | 11200 | 11139 | 11008 | 8950  | 8833  | 8785  | 9111  | 9915  | 10667 | 10227 |
| Pcyox1l | 940   | 1251  | 1714  | 1471  | 1583  | 1300  | 1200  | 1348  | 1448  | 1661  | 1470  | 1882  | 1647  | 1522  | 1033  | 1186  | 1753  | 1366  | 1604  | 1232  | 1296  | 1698  | 1383  | 2020  | 1803  | 1993  | 1699  | 1567  |
| Pcyl1a  | 9476  | 9048  | 8633  | 7719  | 7180  | 7730  | 7744  | 6553  | 6347  | 6020  | 6029  | 6384  | 6424  | 6512  | 9337  | 9006  | 8316  | 7990  | 7398  | 8114  | 7340  | 6223  | 6216  | 5966  | 6412  | 6060  | 6951  | 6515  |
| Pcyl1b  | 1831  | 2044  | 1577  | 2113  | 2788  | 2527  | 2649  | 5179  | 4698  | 5232  | 4143  | 4557  | 4131  | 4633  | 2213  | 1746  | 2073  | 2188  | 2416  | 2536  | 2657  | 5910  | 4251  | 4255  | 5662  | 3670  | 4350  | 4025  |
| Pcyl2   | 4642  | 6549  | 5870  | 6225  | 5139  | 5049  | 4797  | 3047  | 3474  | 3879  | 3518  | 3529  | 3730  | 3653  | 4487  | 6012  | 5945  | 6352  | 5500  | 4628  | 4766  | 3681  | 3435  | 3750  | 3917  | 3990  | 3987  | 3725  |
| Pdap1   | 11418 | 12836 | 17147 | 15172 | 12003 | 11468 | 14005 | 9944  | 10515 | 13872 | 12002 | 13743 | 12287 | 17133 | 11074 | 10520 | 15755 | 12995 | 13552 | 11744 | 13744 | 9519  | 10103 | 15039 | 13200 | 17599 | 13655 | 16576 |
| Pdc     | 6     | 5     | 4     | 0     | 1     | 3     | 1     | 5     | 8     | 3     | 5     | 18    | 17    | 0     | 7     | 2     | 1     | 0     | 0     | 2     | 0     | 2     | 3     | 1     | 2     | 5     | 6     | 7     |
| Pdc1    | 0     | 1     | 1     | 0     | 0     | 0     | 0     | 5     | 6     | 9     | 4     | 3     | 1     | 0     | 0     | 0     | 0     | 0     | 0     | 1     | 0     | 2     | 4     | 1     | 1     | 7     | 0     | 1     |
| Pdc10   | 4790  | 3444  | 4085  | 4093  | 3669  | 3846  | 4641  | 4172  | 3363  | 3004  | 2974  | 3114  | 3307  | 3544  | 5156  | 4406  | 4014  | 3879  | 4048  | 4765  | 4424  | 2909  | 3555  | 2987  | 3210  | 3480  | 3282  | 3665  |
| Pdc11   | 7972  | 9286  | 7393  | 7914  | 6035  | 7002  | 6510  | 5631  | 6290  | 6071  | 6082  | 6928  | 6541  | 6786  | 7159  | 8276  | 7615  | 7334  | 6723  | 6666  | 6629  | 5021  | 5787  | 6101  | 6539  | 5899  | 7445  | 6696  |
| Pdc11g2 | 0     | 0     | 2     | 0     | 2     | 0     | 0     | 0     | 0     | 1     | 0     | 0     | 0     | 0     | 1     | 5     | 0     | 1     | 0     | 1     | 0     | 0     | 0     | 0     | 1     | 0     | 0     | 0     |
| Pdc2    | 1711  | 1592  | 1645  | 1597  | 1562  | 1519  | 1804  | 1599  | 1285  | 1431  | 1343  | 1486  | 1386  | 1574  | 1685  | 1468  | 1559  | 1558  | 1552  | 1670  | 1600  | 1504  | 1325  | 1472  | 1443  | 1624  | 1438  | 1575  |
| Pdc2l   | 1429  | 1540  | 1375  | 1404  | 1230  | 1237  | 1288  | 1216  | 1187  | 1227  | 1222  | 1446  | 1309  | 1400  | 1396  | 1186  | 1462  | 1414  | 1405  | 1399  | 1341  | 1230  | 1110  | 1276  | 1313  | 1370  | 1291  | 1412  |
| Pdc4    | 7199  | 5809  | 7839  | 7711  | 6419  | 6580  | 8561  | 6681  | 6049  | 6912  | 6788  | 7248  | 7750  | 7648  | 6682  | 6892  | 7369  | 7773  | 7198  | 7119  | 7586  | 6629  | 6552  | 8238  | 7209  | 8711  | 7096  | 7971  |
| Pdc5    | 2200  | 2024  | 2497  | 2330  | 2071  | 1907  | 2360  | 2591  | 2164  | 2603  | 2489  | 2582  | 2510  | 3259  | 2135  | 1791  | 2416  | 1991  | 2036  | 2580  | 2374  | 2247  | 2208  | 2741  | 2564  | 3058  | 2638  | 3113  |
| Pdc6    | 4549  | 4084  | 3225  | 3265  | 3053  | 3145  | 3695  | 3640  | 3159  | 2713  | 3016  | 3001  | 3055  | 3350  | 4406  | 3811  | 3310  | 3185  | 3157  | 3736  | 3568  | 2916  | 3236  | 2798  | 2756  | 3086  | 2925  | 3165  |
| Pdc6ip  | 7494  | 6998  | 8551  | 7589  | 6884  | 7129  | 7222  | 5675  | 6143  | 6975  | 7061  | 7425  | 7017  | 7760  | 6943  | 7902  | 7787  | 7902  | 6919  | 5414  | 7129  | 7225  | 6685  | 7044  | 6538  | 7050  | 6594  | 7523  |
| Pdc7    | 1812  | 1784  | 2045  | 2114  | 1595  | 1330  | 1674  | 1704  | 1588  | 1571  | 1655  | 1640  | 1648  | 1734  | 1705  | 1576  | 1931  | 1673  | 1826  | 1683  | 1674  | 1551  | 1552  | 1777  | 1769  | 2003  | 1648  | 1799  |
| Pdcl    | 5357  | 4773  | 5926  | 5072  | 5479  | 5246  | 6032  | 7955  | 6328  | 5625  | 5557  | 6894  | 6590  | 7637  | 6177  | 5013  | 5665  | 5080  | 5843  | 6673  | 5756  | 6350  | 6501  | 6636  | 6614  | 7077  | 7369  | 7440  |
| Pdcl2   | 0     | 0     | 0     | 0     | 1     | 0     | 0     | 0     | 0     | 0     | 0     | 0     | 0     | 0     | 0     | 1     | 0     | 0     | 0     | 0     | 0     | 0     | 0     | 0     | 0     | 0     | 0     | 0     |
| Pdcl3   | 5016  | 4922  | 5266  | 5015  | 4101  | 4041  | 5011  | 4115  | 3502  | 3330  | 3393  | 3616  | 3585  | 4205  | 5178  | 4693  | 5055  | 4863  | 4560  | 5267  | 4780  | 3461  | 3634  | 4087  | 3826  | 4281  | 3713  | 4195  |
| Pde10a  | 1405  | 1559  | 1213  | 1718  | 2986  | 2391  | 2738  | 3212  | 3238  | 3800  | 3101  | 2864  | 2498  | 2984  | 1573  | 1348  | 1659  | 1897  | 2607  | 2147  | 2829  | 4139  | 3012  | 3154  | 4323  | 1839  | 2393  | 2566  |
| Pde11a  | 18    | 23    | 19    | 17    | 70    | 51    | 47    | 44    | 97    | 52    | 105   | 20    | 40    | 38    | 34    | 27    | 41    | 35    | 23    | 66    | 42    | 69    | 91    | 62    | 61    | 8     | 48    | 49    |
| Pde1a   | 258   | 149   | 159   | 221   | 338   | 255   | 389   | 383   | 486   | 346   | 589   | 307   | 202   | 350   | 231   | 161   | 147   | 269   | 294   | 367   | 383   | 403   | 499   | 333   | 450   | 300   | 251   | 250   |
| Pde1b   | 2682  | 3359  | 3276  | 4115  | 5636  | 4831  | 4773  | 5145  | 5135  | 5418  | 4553  | 5473  | 5389  | 5187  | 3190  | 2695  | 4085  | 4616  | 5791  | 4713  | 5292  | 5461  | 4612  | 5480  | 6072  | 3897  | 4762  | 4824  |
| Pde1c   | 1366  | 1144  | 819   | 1145  | 1847  | 1843  | 1555  | 2818  | 2558  | 1909  | 2108  | 1486  | 1643  | 1622  | 1524  | 1353  | 907   | 1152  | 1280  | 1899  | 1561  | 1980  | 2548  | 1390  | 2175  | 1231  | 1680  | 1329  |
| Pde2a   | 17    | 22    | 6     | 17    | 30    | 23    | 28    | 10    | 8     | 20    | 14    | 8     | 6     | 17    | 20    | 6     | 17    | 17    | 18    | 13    | 29    | 22    | 26    | 19    | 17    | 4     | 3     | 17    |
| Pde3a   | 1444  | 980   | 1090  | 982   | 946   | 1394  | 830   | 1590  | 2124  | 2641  | 2621  | 1416  | 1719  | 1469  | 1273  | 1542  | 802   | 1092  | 926   | 825   | 840   | 2087  | 2452  | 1527  | 1628  | 1111  | 1684  | 1450  |
| Pde3b   | 3275  | 2293  | 3144  | 2819  | 2598  | 2636  | 2950  | 2900  | 2619  | 2618  | 2721  | 3331  | 3345  | 3480  | 3069  | 2894  | 2843  | 2608  | 2724  | 2389  | 2549  | 2876  | 2372  | 2953  | 3022  | 3423  | 3410  | 3706  |
| Pde4a   | 1159  | 1476  | 1385  | 2257  | 2601  | 2052  | 2276  | 894   | 1134  | 1527  | 1213  | 1344  | 972   | 1272  | 1162  | 1275  | 1990  | 2281  | 2507  | 1869  | 2175  | 1684  | 994   | 1450  | 1597  | 1190  | 1084  | 1180  |
| Pde4b   | 1031  | 822   | 801   | 1067  | 1629  | 1410  | 1415  | 2003  | 2001  | 1861  | 1999  | 1130  | 1330  | 1322  | 1113  | 786   | 907   | 1078  | 1441  | 1438  | 1500  | 2396  | 2117  | 1553  | 2123  | 964   | 1263  | 1081  |
| Pde4c   | 15    | 25    | 36    | 13    | 5     | 1     | 3     | 5     | 0     | 3     | 6     | 2     | 2     | 0     | 7     | 5     | 6     | 4     | 5     | 1     | 2     | 8     | 3     | 0     | 5     | 3     | 2     | 2     |
| Pde4d   | 1736  | 1906  | 1591  | 2460  | 2876  | 2774  | 2537  | 2199  | 2290  | 2368  | 2083  | 1891  | 1964  | 1710  | 2035  | 1883  | 2154  | 2702  | 2661  | 2532  | 2707  | 2772  | 2102  | 1979  | 2539  | 1235  | 1898  | 1810  |
| Pde4ip  | 9797  | 10818 | 7796  | 10940 | 13357 | 11562 | 11693 | 10187 | 10854 | 10679 | 10686 | 7478  | 8816  | 7933  | 10599 | 10069 | 9250  | 11898 | 11531 | 11716 | 12566 | 11931 | 9483  | 8292  | 11275 | 5426  | 7316  | 7098  |
| Pde5a   | 2656  | 1915  | 2153  | 1925  | 2437  | 2343  | 2617  | 3301  | 2909  | 2782  | 2883  | 3102  | 2880  | 3135  | 2703  | 2034  | 2265  | 1955  | 2471  | 2508  | 2439  | 2540  | 2966  | 2793  | 2680  | 2777  | 3290  | 3287  |
| Pde6a   | 0     | 4     | 2     | 8     | 1     | 1     | 3     | 11    | 10    | 10    | 4     | 9     | 2     | 4     | 9     | 0     | 6     | 0     | 1     | 7     | 11    | 11    | 8     | 8     | 7     | 2     | 2     |       |
| Pde6b   | 0     | 0     | 1     | 1     | 0     | 8     | 3     | 0     | 0     | 0     | 0     | 0     | 0     | 0     | 0     | 0     | 2     | 1     | 1     | 3     | 0     | 0     | 0     | 0     | 0     | 0     | 0     |       |
| Pde6c   | 6     | 14    | 5     | 11    | 22    | 15    | 7     | 28    | 36    | 42    | 26    | 31    | 64    | 16    | 20    | 30    | 2     | 9     | 19    | 7     | 12    | 50    | 56    | 11    | 23    | 2     | 9     | 12    |
| Pde6d   | 2683  | 2994  | 3138  | 2882  | 2834  | 2395  | 2849  | 212   |       |       |       |       |       |       |       |       |       |       |       |       |       |       |       |       |       |       |       |       |

|         |       |       |       |       |       |       |       |       |       |       |       |       |       |       |       |       |       |       |       |       |       |       |       |       |       |       |       |       |         |
|---------|-------|-------|-------|-------|-------|-------|-------|-------|-------|-------|-------|-------|-------|-------|-------|-------|-------|-------|-------|-------|-------|-------|-------|-------|-------|-------|-------|-------|---------|
| Pdk3    | 3690  | 3156  | 2316  | 2110  | 1829  | 2364  | 2482  | 2394  | 2346  | 1848  | 1846  | 1981  | 2147  | 2060  | 3397  | 3113  | 2140  | 2121  | 2186  | 2574  | 2401  | 1636  | 2405  | 1754  | 1683  | 2378  | 2138  | 2160  | Pdk3    |
| Pdk4    | 366   | 308   | 230   | 296   | 241   | 351   | 292   | 128   | 186   | 155   | 134   | 118   | 107   | 93    | 336   | 320   | 234   | 306   | 238   | 257   | 271   | 104   | 169   | 127   | 83    | 106   | 78    | 101   | Pdk4    |
| Pdlim1  | 1329  | 1342  | 1382  | 822   | 664   | 795   | 748   | 902   | 1071  | 668   | 708   | 905   | 909   | 782   | 1192  | 1400  | 1038  | 822   | 865   | 769   | 636   | 423   | 996   | 766   | 401   | 985   | 830   | 1003  | Pdlim1  |
| Pdlim2  | 311   | 319   | 348   | 160   | 140   | 197   | 93    | 285   | 351   | 258   | 256   | 241   | 396   | 261   | 282   | 378   | 190   | 151   | 129   | 184   | 134   | 211   | 409   | 273   | 222   | 253   | 372   | 343   | Pdlim2  |
| Pdlim3  | 599   | 566   | 925   | 448   | 458   | 557   | 457   | 766   | 550   | 574   | 1098  | 701   | 458   | 791   | 550   | 397   | 649   | 424   | 563   | 432   | 491   | 632   | 886   | 625   | 606   | 688   | 1067  | 891   | Pdlim3  |
| Pdlim4  | 1734  | 1887  | 1551  | 1542  | 1202  | 1251  | 1009  | 847   | 1069  | 828   | 1020  | 755   | 941   | 661   | 1441  | 2021  | 1442  | 1415  | 1308  | 1039  | 1057  | 627   | 1065  | 900   | 532   | 1025  | 804   | 758   | Pdlim4  |
| Pdlim5  | 6144  | 5578  | 6763  | 5646  | 4875  | 4910  | 5031  | 2379  | 2536  | 2277  | 2687  | 2526  | 2903  | 2409  | 6581  | 6511  | 5991  | 5907  | 4740  | 4824  | 4862  | 2817  | 3209  | 2281  | 2258  | 2495  | 2807  | 2428  | Pdlim5  |
| Pdlim7  | 3676  | 5279  | 4536  | 4736  | 3625  | 3706  | 3596  | 2201  | 2639  | 2868  | 3519  | 2870  | 3098  | 2783  | 3560  | 4365  | 4530  | 4813  | 3956  | 3199  | 3852  | 3038  | 2999  | 3324  | 2918  | 3170  | 2959  | 2713  | Pdlim7  |
| Pdp1    | 5293  | 4953  | 4637  | 5629  | 5839  | 6014  | 6178  | 5390  | 4296  | 3907  | 3953  | 3847  | 3683  | 3907  | 6078  | 5136  | 5034  | 5675  | 5671  | 6466  | 6179  | 5534  | 4297  | 3858  | 4684  | 3107  | 3799  | 3841  | Pdp1    |
| Pdp2    | 2336  | 2660  | 2652  | 2714  | 2716  | 2577  | 2682  | 2013  | 1768  | 2004  | 1891  | 2199  | 2080  | 2201  | 2308  | 2290  | 2789  | 2787  | 2978  | 2535  | 2725  | 2099  | 1726  | 2022  | 2120  | 1882  | 2152  | 2230  | Pdp2    |
| Pdpk1   | 11845 | 11062 | 8605  | 10954 | 10568 | 11241 | 11171 | 9111  | 8033  | 7595  | 7432  | 7782  | 7525  | 7734  | 11856 | 10697 | 9379  | 10741 | 10361 | 10832 | 11582 | 9478  | 8061  | 7034  | 8730  | 5662  | 7843  | 7644  | Pdpk1   |
| Pdpr    | 3319  | 3177  | 1434  | 2366  | 2562  | 2877  | 2744  | 3142  | 2976  | 2379  | 2688  | 2588  | 2727  | 2758  | 3298  | 2845  | 1847  | 2340  | 2388  | 2843  | 2979  | 2463  | 2847  | 1927  | 2826  | 871   | 3115  | 2470  | Pdpr    |
| Pdrg1   | 4657  | 5309  | 4655  | 5729  | 5096  | 5199  | 5281  | 3947  | 3723  | 3760  | 3843  | 3393  | 3627  | 3681  | 5163  | 4914  | 5012  | 5734  | 5329  | 5755  | 5542  | 4080  | 3667  | 3790  | 3924  | 3792  | 3689  | 3826  | Pdrg1   |
| Pds5a   | 19568 | 14892 | 15189 | 14939 | 16368 | 17704 | 18464 | 22022 | 18342 | 16517 | 16858 | 20503 | 19619 | 21688 | 19055 | 16049 | 14731 | 14070 | 15844 | 18492 | 17210 | 16078 | 17416 | 17492 | 17974 | 17605 | 21895 | 21289 | Pds5a   |
| Pds5b   | 14542 | 11629 | 9775  | 10531 | 11852 | 13099 | 12552 | 19833 | 17291 | 14885 | 16286 | 15462 | 15636 | 15669 | 14546 | 12974 | 10398 | 10995 | 11278 | 13564 | 12365 | 15575 | 16570 | 13800 | 15363 | 12408 | 16324 | 15060 | Pds5b   |
| Pdss1   | 1876  | 1437  | 1408  | 1689  | 1690  | 1781  | 2097  | 1595  | 1247  | 1257  | 1225  | 1473  | 1371  | 1567  | 1913  | 1546  | 1479  | 1653  | 11670 | 1818  | 2062  | 1465  | 1238  | 1155  | 1487  | 1203  | 1390  | 1455  | Pdss1   |
| Pdss2   | 452   | 495   | 555   | 533   | 460   | 442   | 531   | 702   | 650   | 666   | 622   | 698   | 649   | 786   | 448   | 476   | 453   | 492   | 456   | 582   | 517   | 677   | 622   | 696   | 649   | 752   | 745   | 801   | Pdss2   |
| Pdx1    | 1     | 0     | 0     | 0     | 0     | 0     | 1     | 0     | 0     | 0     | 0     | 0     | 0     | 0     | 0     | 0     | 0     | 0     | 0     | 0     | 1     | 0     | 0     | 0     | 2     | 0     | 0     | 0     | Pdx1    |
| Pdxdc1  | 10526 | 9634  | 8068  | 7917  | 7477  | 8395  | 7842  | 9424  | 9083  | 7724  | 8691  | 7719  | 7977  | 7794  | 10127 | 9256  | 7776  | 7614  | 7557  | 8361  | 8135  | 8163  | 9622  | 7764  | 7897  | 7852  | 8278  | 8065  | Pdxdc1  |
| Pdxk    | 3555  | 4391  | 4075  | 4556  | 4227  | 3855  | 3503  | 1506  | 1875  | 1962  | 2067  | 1655  | 1838  | 1599  | 3500  | 4472  | 3745  | 4537  | 4090  | 3279  | 3559  | 2259  | 2094  | 1790  | 2053  | 1809  | 1764  | 1595  | Pdxk    |
| Pdpx    | 636   | 733   | 650   | 984   | 973   | 795   | 1054  | 615   | 554   | 864   | 648   | 589   | 411   | 675   | 580   | 435   | 877   | 934   | 1050  | 777   | 1166  | 754   | 485   | 824   | 858   | 674   | 499   | 616   | Pdpx    |
| Pdyn    | 81    | 161   | 78    | 215   | 373   | 256   | 237   | 272   | 260   | 247   | 228   | 93    | 237   | 99    | 322   | 172   | 145   | 265   | 202   | 242   | 242   | 334   | 258   | 114   | 160   | 49    | 126   | 106   | Pdyn    |
| Pdzd11  | 2644  | 2761  | 2767  | 2334  | 2219  | 2296  | 2596  | 3209  | 2863  | 2623  | 2517  | 3036  | 2964  | 3512  | 2946  | 2482  | 2650  | 2363  | 2447  | 2761  | 2510  | 2488  | 2832  | 2962  | 2612  | 3311  | 3177  | 3529  | Pdzd11  |
| Pdzd2   | 791   | 863   | 880   | 718   | 1038  | 858   | 628   | 1108  | 1521  | 1865  | 2489  | 1302  | 1419  | 1222  | 715   | 1054  | 766   | 934   | 803   | 554   | 682   | 1602  | 2012  | 1352  | 1395  | 761   | 1418  | 1295  | Pdzd2   |
| Pdzd3   | 7     | 23    | 8     | 34    | 39    | 21    | 26    | 40    | 55    | 58    | 40    | 40    | 34    | 42    | 12    | 7     | 19    | 42    | 15    | 35    | 47    | 63    | 53    | 38    | 69    | 38    | 89    | Pdzd3 |         |
| Pdzd4   | 5691  | 6476  | 6529  | 11828 | 13502 | 11073 | 12585 | 8157  | 8665  | 12304 | 9657  | 9531  | 7379  | 10103 | 5979  | 4581  | 9693  | 11826 | 13965 | 9712  | 14334 | 12741 | 8244  | 11804 | 13329 | 8705  | 7898  | 9163  | Pdzd4   |
| Pdzd7   | 314   | 383   | 365   | 604   | 799   | 582   | 584   | 225   | 278   | 366   | 265   | 198   | 172   | 193   | 347   | 391   | 521   | 661   | 661   | 453   | 569   | 408   | 269   | 313   | 358   | 182   | 166   | 179   | Pdzd7   |
| Pdzd8   | 10795 | 8952  | 8825  | 10133 | 9561  | 10131 | 10123 | 6825  | 6597  | 6387  | 7019  | 6721  | 7263  | 6790  | 10461 | 10011 | 8903  | 10489 | 9001  | 9126  | 9631  | 6577  | 6209  | 5966  | 6507  | 6126  | 7055  | 6737  | Pdzd8   |
| Pdzd9   | 22    | 15    | 47    | 17    | 13    | 27    | 18    | 16    | 16    | 10    | 16    | 7     | 16    | 18    | 21    | 26    | 19    | 7     | 10    | 14    | 12    | 12    | 16    | 24    | 10    | 20    | 19    | Pdzd9 |         |
| Pdzk1   | 7     | 16    | 15    | 28    | 19    | 9     | 13    | 2     | 12    | 9     | 15    | 7     | 11    | 6     | 16    | 18    | 19    | 19    | 11    | 16    | 20    | 5     | 4     | 7     | 8     | 3     | 5     | 1     | Pdzk1   |
| Pdzk1p1 | 116   | 184   | 141   | 124   | 82    | 122   | 111   | 158   | 236   | 180   | 148   | 178   | 435   | 229   | 136   | 158   | 105   | 111   | 130   | 157   | 102   | 120   | 217   | 105   | 129   | 193   | 248   | 485   | Pdzk1p1 |
| Pdzph1  | 148   | 149   | 243   | 104   | 85    | 132   | 149   | 269   | 185   | 159   | 165   | 381   | 352   | 446   | 146   | 121   | 183   | 90    | 143   | 175   | 133   | 175   | 156   | 217   | 257   | 402   | 439   | 576   | Pdzph1  |
| Pdzrn3  | 3714  | 4438  | 3628  | 3570  | 3660  | 3537  | 2890  | 3621  | 3547  | 4000  | 4305  | 3087  | 3845  | 2845  | 4189  | 4817  | 3582  | 3791  | 3114  | 3362  | 3060  | 4137  | 4401  | 3459  | 3674  | 2925  | 3094  | 2797  | Pdzrn3  |
| Pdzrn4  | 519   | 781   | 686   | 803   | 1297  | 922   | 981   | 1422  | 1350  | 1723  | 1400  | 878   | 1452  | 948   | 790   | 600   | 829   | 876   | 959   | 1050  | 1059  | 1793  | 1555  | 999   | 1303  | 699   | 1002  | 946   | Pdzrn4  |
| Pea15a  | 27508 | 33071 | 26658 | 29244 | 28526 | 30228 | 32742 | 26710 | 23206 | 22872 | 18909 | 26066 | 21127 | 27327 | 32690 | 25297 | 30057 | 28159 | 31948 | 31747 | 32877 | 24182 | 22319 | 23222 | 25372 | 26870 | 25544 | 26748 | Pea15a  |
| Peak1   | 4218  | 4043  | 2429  | 3086  | 3768  | 3981  | 3108  | 2133  | 2639  | 2217  | 2789  | 1596  | 2163  | 1527  | 4048  | 4582  | 2422  | 3469  | 3042  | 3439  | 3731  | 1995  | 2691  | 1490  | 1883  | 1042  | 1696  | 1456  | Peak1   |
| Peak1   | 791   | 1063  | 1124  | 788   | 758   | 701   | 462   | 703   | 1132  | 1178  | 1649  | 1051  | 1382  | 865   | 778   | 1276  | 890   | 954   | 556   | 484   | 433   | 1258  | 1452  | 1119  | 1008  | 1262  | 1209  | 879   | Peak1   |
| Pebp1   | 19887 | 23570 | 18609 | 21476 | 19372 | 19963 | 20956 | 18005 | 18938 | 17808 | 16607 | 18323 | 18787 | 18996 | 19551 | 19390 | 20561 | 19657 | 22875 | 22018 | 21356 | 16619 | 18921 | 18994 | 19372 | 20694 | 19113 | 20103 | Pebp1   |
| Pebp4   | 2     | 2     | 1     | 3     | 1     | 0     | 0     | 1     | 0     | 0     | 1     | 0     | 0     | 0     | 0     | 2     | 0     | 0     | 0     | 2     | 0     | 3     | 2     | 0     | 0     | 0     | 0     | 0     | Pebp4   |
| Pecam1  | 2906  | 2700  | 2441  | 2310  | 2271  | 2487  | 2005  | 3035  | 3193  | 3045  | 3547  | 2678  | 2895  | 2445  | 2753  | 2798  | 2062  | 2532  | 2343  | 2575  | 2200  | 3128  | 3903  | 2978  | 2659  | 3552  | 2851  | 2665  | Pecam1  |
| Pecr    | 576   | 596   | 627   | 598   | 455   | 540   | 543   | 418   | 443   | 378   | 436   | 379   | 510   | 360   | 567   | 645   | 538   | 634   | 460   | 599   | 561   | 292   | 491   | 385   | 337   | 496   | 431   | 430   | Pecr    |
| Pef1    | 1369  | 1716  | 1413  | 1192  | 1273  | 1313  | 1247  | 2144  | 2505  | 2138  | 1975  | 2270  | 2333  | 2272  | 1396  | 1467  | 1460  | 1246  | 1455  | 1459  | 1180  | 1973  | 2557  | 2253  | 2361  | 2688  | 2581  | 2515  | Pef1    |
| Peg10   | 26994 | 22340 | 29279 | 32683 | 30315 | 29514 | 33839 | 17239 | 20516 | 23350 | 29417 | 24359 | 17964 | 25450 | 25500 | 25160 | 37454 | 32611 | 30877 | 21228 | 32213 | 34499 | 18898 | 23367 | 22208 | 27372 | 21601 | 22783 | Peg10   |
| Peg12   | 1213  | 1453  | 2019  | 1249  | 1222  | 1218  | 1437  | 1783  | 1645  | 1818  | 1747  | 3207  | 2801  | 3588  | 1340  | 1086  | 1870  | 1038  | 1454  | 1226  | 1301  | 1485  | 1543  | 2531  | 2191  | 3711  | 3519  | 3710  | Peg12   |
| Peg3    | 64735 | 58680 | 35775 | 46169 | 40679 | 50576 | 45561 | 42985 | 54437 | 42038 | 71535 | 37247 | 41891 | 37439 | 61430 | 64224 | 40806 | 48730 | 38641 | 45742 | 44537 | 46404 | 54839 | 34587 | 39334 | 28581 | 38822 | 32144 | Peg3    |
| Pel1    | 8173  | 6808  | 7932  | 8605  | 9051  | 8882  | 10731 | 10640 | 8819  | 8962  | 8005  | 10467 | 9228  | 11230 | 8867  | 6988  | 8177  | 8670  | 9180  | 9373  | 10221 | 10368 | 8331  | 9789  | 10671 | 9851  | 10036 | 11017 | Pel1    |
| Pel2    | 2624  | 2540  | 4048  | 3595  | 3693  | 3168  | 3363  | 1953  | 2167  | 2481  | 2473  | 2836  | 2767  | 2864  | 2806  | 2875  | 3650  | 3386  | 3564  | 2674  | 3377  | 2764  | 2023  | 2553  | 2511  | 2221  | 2506  | 2855  | Pel2    |
| Pel3    | 1151  | 1172  | 1297  | 1408  | 1526  | 1495  |       |       |       |       |       |       |       |       |       |       |       |       |       |       |       |       |       |       |       |       |       |       |         |

|         |       |       |       |       |       |       |       |       |       |       |       |       |       |       |       |       |       |       |       |       |       |       |       |       |       |       |       |       |         |       |
|---------|-------|-------|-------|-------|-------|-------|-------|-------|-------|-------|-------|-------|-------|-------|-------|-------|-------|-------|-------|-------|-------|-------|-------|-------|-------|-------|-------|-------|---------|-------|
| Pfas    | 6151  | 6829  | 7024  | 7075  | 5507  | 5707  | 5602  | 4671  | 5238  | 5462  | 5445  | 7402  | 6321  | 6359  | 5540  | 6487  | 7017  | 6454  | 6315  | 5115  | 5384  | 4674  | 4841  | 6357  | 5770  | 6545  | 6890  | 6796  | Pfas    |       |
| Pfdn1   | 2870  | 2737  | 3199  | 2435  | 2151  | 2169  | 2770  | 4284  | 3597  | 3675  | 3846  | 3920  | 3875  | 5647  | 2914  | 2526  | 2858  | 2324  | 2162  | 2866  | 2630  | 3096  | 3886  | 4332  | 3784  | 4493  | 4171  | 5327  | Pfdn1   |       |
| Pfdn2   | 5242  | 5346  | 7415  | 6884  | 5702  | 5546  | 6968  | 5203  | 4403  | 5602  | 5200  | 6192  | 5391  | 7715  | 5401  | 4407  | 7310  | 6001  | 6317  | 6005  | 7189  | 4991  | 4434  | 6838  | 6235  | 7152  | 6307  | 7562  | Pfdn2   |       |
| Pfdn4   | 2309  | 2138  | 2315  | 2628  | 2360  | 2300  | 2909  | 2424  | 1984  | 2238  | 1662  | 1987  | 2066  | 2505  | 2457  | 2120  | 2293  | 2374  | 2226  | 2987  | 2828  | 1763  | 1956  | 2173  | 2083  | 2129  | 2183  | 2529  | Pfdn4   |       |
| Pfdn5   | 7916  | 7749  | 7661  | 7965  | 7135  | 7060  | 8072  | 8144  | 7383  | 7075  | 7150  | 6923  | 7159  | 8288  | 8064  | 6508  | 7296  | 7090  | 7690  | 8653  | 8284  | 6958  | 7558  | 7797  | 7537  | 8320  | 7891  | 8505  | Pfdn5   |       |
| Pfdn6   | 4828  | 5941  | 8189  | 7520  | 5743  | 5697  | 6023  | 3110  | 3509  | 4303  | 4015  | 4898  | 4501  | 4860  | 5047  | 5074  | 7738  | 6534  | 7063  | 6424  | 6012  | 2879  | 3123  | 5308  | 4905  | 6242  | 5316  | 5381  | Pfdn6   |       |
| Pfkfb1  | 251   | 181   | 199   | 181   | 148   | 203   | 202   | 281   | 321   | 270   | 298   | 320   | 327   | 331   | 227   | 188   | 163   | 138   | 158   | 173   | 144   | 246   | 324   | 203   | 265   | 322   | 311   | 323   | Pfkfb1  |       |
| Pfkfb2  | 2885  | 2580  | 2093  | 2954  | 3052  | 3441  | 3194  | 2260  | 2191  | 2032  | 2166  | 2094  | 2034  | 2091  | 3169  | 2680  | 2405  | 3003  | 2935  | 3070  | 3244  | 2413  | 1990  | 1950  | 2312  | 1613  | 2099  | 1803  | Pfkfb2  |       |
| Pfkfb3  | 1651  | 1614  | 1434  | 1764  | 2715  | 2222  | 2321  | 4263  | 4238  | 4678  | 4494  | 3919  | 3770  | 4492  | 1783  | 1562  | 1763  | 1955  | 2377  | 2274  | 2318  | 4944  | 4030  | 4241  | 5142  | 3721  | 3628  | 3823  | Pfkfb3  |       |
| Pfkfb4  | 1407  | 1823  | 1509  | 1861  | 1865  | 1655  | 1585  | 1304  | 1525  | 1508  | 1475  | 1389  | 1360  | 1303  | 1495  | 1716  | 1618  | 1805  | 1894  | 1662  | 1618  | 1559  | 1484  | 1349  | 1566  | 1260  | 1370  | 1219  | Pfkfb4  |       |
| Pfkl    | 7491  | 8492  | 7862  | 7638  | 7041  | 7274  | 6126  | 7119  | 9334  | 8927  | 8494  | 8823  | 8557  | 7650  | 6915  | 7871  | 8190  | 7653  | 7608  | 6648  | 6464  | 7434  | 9397  | 9628  | 8481  | 10890 | 8832  | 8705  | Pfkl    |       |
| Pfkm    | 5869  | 6830  | 6354  | 7407  | 7616  | 7191  | 6795  | 6378  | 7130  | 7744  | 7248  | 7262  | 6561  | 6519  | 5991  | 6054  | 6873  | 7558  | 8121  | 7065  | 7311  | 7177  | 7282  | 7387  | 7949  | 7439  | 6937  | 6594  | Pfkm    |       |
| Pfkp    | 17466 | 19196 | 10467 | 16703 | 26365 | 24239 | 22248 | 14001 | 13505 | 12295 | 12724 | 5740  | 8448  | 6002  | 21097 | 18890 | 12396 | 18757 | 18809 | 25689 | 24972 | 12579 | 11524 | 5671  | 12644 | 2283  | 5921  | 4480  | Pfkp    |       |
| Pfn1    | 10282 | 11118 | 12066 | 8742  | 7769  | 7508  | 8118  | 10243 | 12128 | 10464 | 11872 | 12530 | 12694 | 13100 | 9260  | 10465 | 10711 | 7894  | 8871  | 7385  | 8073  | 9712  | 12317 | 13041 | 10384 | 15633 | 12729 | 14223 | Pfn1    |       |
| Pfn2    | 19910 | 16628 | 18226 | 21125 | 24296 | 22731 | 24132 | 26555 | 22171 | 24069 | 20930 | 23381 | 20158 | 24028 | 21841 | 16401 | 20619 | 21860 | 23053 | 22934 | 24377 | 29066 | 22427 | 23265 | 26150 | 23311 | 21673 | 23356 | Pfn2    |       |
| Pfn3    | 2     | 3     | 3     | 1     | 6     | 0     | 3     | 0     | 0     | 0     | 1     | 0     | 0     | 1     | 5     | 0     | 1     | 4     | 12    | 2     | 0     | 3     | 2     | 1     | 0     | 2     | 2     | 2     | Pfn3    |       |
| Pfn4    | 54    | 47    | 74    | 78    | 142   | 85    | 104   | 365   | 311   | 399   | 327   | 332   | 295   | 303   | 91    | 51    | 83    | 69    | 127   | 121   | 97    | 353   | 347   | 313   | 385   | 318   | 323   | 295   | Pfn4    |       |
| Pfpl    | 0     | 0     | 0     | 0     | 0     | 0     | 0     | 2     | 0     | 0     | 0     | 0     | 0     | 0     | 2     | 0     | 0     | 1     | 0     | 0     | 0     | 0     | 0     | 0     | 0     | 0     | 0     | 0     | Pfpl    |       |
| Pga5    | 1     | 2     | 0     | 1     | 5     | 0     | 1     | 0     | 9     | 0     | 1     | 0     | 0     | 1     | 0     | 1     | 2     | 5     | 0     | 0     | 3     | 0     | 8     | 6     | 2     | 0     | 0     | 0     | 1       | Pga5  |
| Pgam1   | 14690 | 15812 | 15547 | 13230 | 11898 | 12700 | 12583 | 8926  | 10332 | 9921  | 9403  | 11376 | 11323 | 10234 | 13676 | 14988 | 14638 | 13265 | 13897 | 12432 | 11881 | 8813  | 10861 | 10685 | 9599  | 13984 | 11207 | 11993 | Pgam1   |       |
| Pgam2   | 37    | 79    | 75    | 6     | 3     | 25    | 0     | 27    | 91    | 25    | 366   | 23    | 107   | 32    | 57    | 100   | 29    | 44    | 2     | 6     | 4     | 62    | 261   | 47    | 24    | 47    | 60    | 46    | Pgam2   |       |
| Pgam5   | 5756  | 5461  | 4449  | 4525  | 4147  | 4558  | 4902  | 4756  | 4211  | 3784  | 3595  | 4313  | 3798  | 4192  | 5933  | 4880  | 4602  | 4220  | 4552  | 5388  | 4696  | 3887  | 4145  | 3853  | 3796  | 4523  | 4317  | 4263  | Pgam5   |       |
| Pgap1   | 19229 | 16306 | 11878 | 18078 | 20805 | 22972 | 25251 | 16919 | 13500 | 11296 | 10320 | 11604 | 9787  | 12140 | 22504 | 16080 | 14278 | 18832 | 19187 | 28970 | 24771 | 11787 | 12691 | 9822  | 13953 | 7910  | 11489 | 10703 | Pgap1   |       |
| Pgap2   | 1151  | 957   | 993   | 1048  | 943   | 1003  | 1076  | 1263  | 1110  | 1351  | 1301  | 1165  | 1205  | 1227  | 1153  | 1120  | 962   | 1020  | 923   | 886   | 1134  | 1094  | 1221  | 1253  | 1214  | 1409  | 1097  | 1231  | Pgap2   |       |
| Pgap3   | 127   | 158   | 165   | 80    | 144   | 142   | 137   | 518   | 551   | 552   | 567   | 571   | 606   | 552   | 146   | 121   | 147   | 102   | 134   | 567   | 151   | 118   | 495   | 594   | 588   | 564   | 712   | 589   | 592     | Pgap3 |
| Pgap4   | 950   | 1161  | 1010  | 1090  | 1532  | 1360  | 1131  | 1533  | 1790  | 1617  | 1575  | 1135  | 1264  | 1121  | 1054  | 928   | 999   | 1231  | 1413  | 1381  | 1225  | 1811  | 1694  | 1289  | 1607  | 1076  | 1184  | 1150  | Pgap4   |       |
| Pgap6   | 322   | 420   | 496   | 374   | 416   | 391   | 382   | 346   | 339   | 455   | 352   | 339   | 386   | 298   | 361   | 371   | 509   | 414   | 421   | 391   | 387   | 396   | 400   | 383   | 404   | 373   | 330   | 361   | Pgap6   |       |
| Pgbd1   | 449   | 461   | 679   | 462   | 443   | 434   | 446   | 683   | 600   | 730   | 618   | 774   | 743   | 824   | 483   | 426   | 451   | 376   | 457   | 461   | 437   | 568   | 522   | 780   | 650   | 932   | 824   | 794   | Pgbd1   |       |
| Pgbd5   | 1430  | 2338  | 2122  | 2914  | 2838  | 2423  | 2446  | 946   | 966   | 1196  | 1053  | 1065  | 801   | 909   | 1735  | 1950  | 2473  | 2915  | 2725  | 2220  | 2511  | 1180  | 988   | 1039  | 1135  | 1089  | 915   | 999   | Pgbd5   |       |
| Pgc     | 0     | 0     | 1     | 0     | 0     | 0     | 1     | 1     | 2     | 10    | 2     | 0     | 9     | 0     | 0     | 0     | 0     | 0     | 1     | 0     | 0     | 2     | 4     | 1     | 2     | 1     | 5     | 0     | Pgc     |       |
| Pgd     | 10477 | 13499 | 13354 | 11851 | 10064 | 10820 | 9899  | 7228  | 8150  | 7759  | 8247  | 8842  | 9461  | 9197  | 10303 | 11559 | 12120 | 11017 | 11198 | 10717 | 10608 | 6811  | 8287  | 8579  | 8323  | 10433 | 10361 | 10338 | Pgd     |       |
| Pgf     | 356   | 355   | 249   | 266   | 264   | 384   | 235   | 374   | 449   | 339   | 453   | 331   | 384   | 355   | 332   | 404   | 267   | 328   | 312   | 309   | 262   | 414   | 498   | 371   | 406   | 413   | 303   | 324   | Pgf     |       |
| Pgfhg   | 978   | 1051  | 1061  | 739   | 746   | 853   | 591   | 1230  | 1578  | 1427  | 1396  | 1521  | 1631  | 1260  | 931   | 1136  | 822   | 738   | 764   | 654   | 608   | 1088  | 1676  | 1354  | 1014  | 1739  | 1529  | 1491  | Pgfhg   |       |
| Pggt1b  | 5696  | 4321  | 5237  | 5566  | 4959  | 5434  | 5401  | 5947  | 5188  | 5195  | 5522  | 5861  | 5671  | 5814  | 5898  | 5227  | 4877  | 4880  | 4867  | 5783  | 5362  | 4868  | 5242  | 4857  | 5259  | 4778  | 5798  | 5587  | Pggt1b  |       |
| Pgk1    | 34702 | 34446 | 31617 | 26016 | 23404 | 25589 | 26156 | 22556 | 23152 | 18591 | 19610 | 22619 | 23126 | 23302 | 32591 | 32126 | 28963 | 26133 | 26634 | 30624 | 26059 | 17276 | 23607 | 21533 | 19931 | 26221 | 25221 | 25686 | Pgk1    |       |
| Pgk2    | 0     | 0     | 0     | 0     | 0     | 0     | 0     | 0     | 0     | 0     | 0     | 0     | 0     | 0     | 0     | 0     | 0     | 0     | 0     | 0     | 0     | 0     | 0     | 0     | 0     | 0     | 0     | 0     | Pgk2    |       |
| Pgls    | 2705  | 3216  | 2527  | 2519  | 2295  | 2322  | 2130  | 2810  | 2864  | 2819  | 2647  | 2850  | 2961  | 2624  | 2442  | 2319  | 2462  | 2157  | 2674  | 2437  | 2249  | 2513  | 2753  | 2855  | 2626  | 3237  | 2887  | 2784  | Pgls    |       |
| Pglyrp1 | 27    | 49    | 44    | 51    | 85    | 87    | 85    | 67    | 87    | 113   | 63    | 61    | 65    | 69    | 28    | 19    | 36    | 69    | 79    | 72    | 95    | 75    | 88    | 87    | 100   | 53    | 56    | 65    | Pglyrp1 |       |
| Pglyrp2 | 1     | 0     | 0     | 0     | 0     | 0     | 0     | 0     | 2     | 0     | 0     | 0     | 1     | 5     | 1     | 3     | 1     | 0     | 2     | 0     | 0     | 0     | 3     | 1     | 0     | 6     | 1     | 0     | Pglyrp2 |       |
| Pglyrp3 | 0     | 0     | 0     | 0     | 0     | 0     | 0     | 6     | 9     | 9     | 1     | 0     | 0     | 0     | 0     | 0     | 0     | 0     | 0     | 0     | 0     | 0     | 12    | 0     | 0     | 0     | 0     | 0     | Pglyrp3 |       |
| Pglyrp4 | 0     | 0     | 0     | 0     | 0     | 0     | 0     | 0     | 0     | 0     | 0     | 0     | 0     | 0     | 0     | 0     | 0     | 1     | 0     | 0     | 0     | 0     | 0     | 0     | 0     | 0     | 0     | 0     | Pglyrp4 |       |
| Pgm1    | 0     | 0     | 0     | 0     | 0     | 0     | 0     | 0     | 1     | 0     | 0     | 0     | 1     | 0     | 0     | 0     | 0     | 0     | 1     | 0     | 0     | 0     | 1     | 1     | 1     | 1     | 0     | 0     | Pgm1    |       |
| Pgm2    | 4384  | 4274  | 3814  | 3957  | 3738  | 3924  | 4073  | 2119  | 2167  | 2292  | 2185  | 2111  | 2141  | 2313  | 3952  | 4203  | 4074  | 4001  | 4083  | 4138  | 4161  | 1823  | 2255  | 2339  | 2682  | 2562  | 2219  | 2254  | Pgm2    |       |
| Pgm21   | 12093 | 9887  | 9854  | 13020 | 16336 | 16037 | 15320 | 14696 | 11059 | 12822 | 11400 | 10663 | 12580 | 11424 | 13260 | 11751 | 11561 | 13063 | 13606 | 14784 | 16303 | 14639 | 11035 | 10089 | 13337 | 6538  | 11718 | 11783 | Pgm21   |       |
| Pgm3    | 4105  | 3539  | 2907  | 3250  | 3156  | 3395  | 3405  | 2523  | 2302  | 2042  | 2091  | 2027  | 2110  | 2164  | 4139  | 3708  | 2866  | 3169  | 3174  | 3728  | 3336  | 2135  | 2351  | 2059  | 2211  | 1792  | 2271  | 2169  | Pgm3    |       |
| Pgm5    | 890   | 668   | 363   | 668   | 583   | 1158  | 220   | 1494  | 2366  | 1465  | 2665  | 727   | 1339  | 802   | 897   | 1082  | 520   | 1035  | 281   | 510   | 317   | 1230  | 3030  | 1154  | 1198  | 592   | 661   | 699   | Pgm5    |       |
| Pgp     | 3580  | 4399  | 4004  | 4565  | 3510  | 3586  | 3690  | 1476  | 1808  | 1944  | 1972  | 2323  | 2048  | 2101  | 3471  | 3777  | 4132  | 4325  | 3670  | 3234  | 3808  | 1953  | 1879  | 2117  | 2162  | 2486  | 2158  | 2245  | Pgp     |       |
| Pgpep1  | 6234  | 8978  | 7745  | 7938  | 5830  | 6086  | 5596  | 4257  | 3854  | 4166  | 3926  | 4628  | 5441  | 4558  | 6613  | 7675  | 8306  | 7154  | 6647  | 5900  | 5987  | 3940  | 4259  | 4327  | 4424  | 4442  | 5396  | 5207  | Pgpep1  |       |
| Pgpep1  | 29    | 28    | 21    | 29    | 27    | 22    | 22    | 6     | 7     | 19    | 31    | 10    | 17    | 6     | 21    | 45    | 21    | 34    | 12    | 18    | 13    | 15    | 19    | 11    | 2     | 7     |       |       |         |       |

|          |       |       |       |       |       |       |       |       |       |       |       |       |       |       |       |       |       |       |       |       |       |       |       |       |       |       |       |       |          |          |
|----------|-------|-------|-------|-------|-------|-------|-------|-------|-------|-------|-------|-------|-------|-------|-------|-------|-------|-------|-------|-------|-------|-------|-------|-------|-------|-------|-------|-------|----------|----------|
| Phf20    | 9326  | 9070  | 7653  | 9146  | 9659  | 9674  | 10254 | 7995  | 7392  | 7811  | 6980  | 7714  | 7038  | 7496  | 9808  | 8449  | 8620  | 9487  | 9104  | 10089 | 9886  | 7133  | 7091  | 7303  | 7812  | 6397  | 7764  | 7334  | Phf20    |          |
| Phf201a  | 12901 | 9044  | 8624  | 11511 | 12066 | 14017 | 15046 | 15560 | 13632 | 12650 | 12657 | 12734 | 12037 | 13729 | 13121 | 11292 | 9684  | 11642 | 11208 | 14045 | 14799 | 12469 | 12558 | 12374 | 14354 | 9638  | 12605 | 12057 | Phf201a  |          |
| Phf21a   | 7575  | 7552  | 8638  | 9596  | 10933 | 9760  | 10632 | 7999  | 7977  | 9370  | 8818  | 9713  | 8977  | 7771  | 7452  | 6827  | 9868  | 9695  | 11010 | 9180  | 11138 | 8748  | 7536  | 9997  | 9635  | 8399  | 9238  | 9079  | Phf21a   |          |
| Phf21b   | 4854  | 6631  | 8481  | 8664  | 9056  | 8076  | 7222  | 6090  | 6008  | 9052  | 6865  | 12767 | 9046  | 11000 | 5164  | 5001  | 9962  | 7711  | 9745  | 6455  | 7649  | 8779  | 5080  | 10763 | 10505 | 11594 | 10931 | 11165 | Phf21b   |          |
| Phf23    | 4420  | 5447  | 5926  | 5598  | 5254  | 5164  | 5363  | 4730  | 4686  | 4871  | 5160  | 5648  | 5245  | 6009  | 4210  | 4399  | 5726  | 5487  | 5871  | 4636  | 5470  | 4604  | 4916  | 5727  | 5224  | 6668  | 5497  | 6404  | Phf23    |          |
| Phf24    | 2212  | 2718  | 1806  | 3847  | 5507  | 4755  | 4241  | 2599  | 2946  | 3300  | 2888  | 1876  | 2097  | 1955  | 2781  | 2720  | 2788  | 4503  | 4216  | 3579  | 4782  | 4361  | 2421  | 2214  | 3627  | 981   | 1664  | 1540  | Phf24    |          |
| Phf3     | 10720 | 9896  | 8728  | 10645 | 10971 | 11147 | 11336 | 13643 | 11947 | 11901 | 12231 | 12029 | 12014 | 12837 | 10445 | 9890  | 9507  | 10528 | 10644 | 11329 | 11526 | 11921 | 11753 | 11450 | 12864 | 8734  | 12414 | 11769 | Phf3     |          |
| Phf5a    | 4390  | 4996  | 4919  | 4211  | 3724  | 3991  | 4255  | 3845  | 3945  | 3971  | 3797  | 4605  | 4568  | 5029  | 4247  | 4509  | 4395  | 4140  | 4408  | 4696  | 4127  | 3394  | 3926  | 4545  | 4072  | 5841  | 4969  | 5292  | Phf5a    |          |
| Phf6     | 12952 | 9448  | 10440 | 9782  | 11083 | 10747 | 12501 | 16321 | 12947 | 12605 | 10955 | 14139 | 13061 | 15520 | 12539 | 10552 | 10362 | 9556  | 11113 | 12595 | 12071 | 13226 | 12079 | 13473 | 13814 | 14244 | 14704 | 14663 | Phf6     |          |
| Phf7     | 1054  | 833   | 900   | 110   | 839   | 822   | 1009  | 805   | 807   | 8003  | 782   | 907   | 908   | 945   | 915   | 879   | 845   | 815   | 747   | 948   | 936   | 752   | 836   | 734   | 842   | 959   | 873   | 904   | Phf7     |          |
| Phf8     | 5879  | 5408  | 5325  | 5156  | 5455  | 5438  | 5188  | 5302  | 4815  | 5088  | 4492  | 5910  | 5218  | 6102  | 5559  | 4780  | 5683  | 4872  | 5602  | 5011  | 5501  | 5868  | 4324  | 5689  | 5685  | 4519  | 5536  | 5895  | Phf8     |          |
| Phgdh    | 11195 | 14700 | 12576 | 10254 | 8446  | 9437  | 8765  | 8072  | 9532  | 7287  | 6951  | 9816  | 8960  | 9427  | 10772 | 11533 | 11330 | 8945  | 10584 | 10336 | 9075  | 5518  | 8813  | 8338  | 7467  | 11708 | 10644 | 10671 | Phgdh    |          |
| Phgr1    | 2     | 0     | 0     | 4     | 0     | 1     | 1     | 0     | 1     | 0     | 0     | 0     | 0     | 0     | 0     | 0     | 0     | 0     | 0     | 0     | 1     | 0     | 0     | 0     | 0     | 0     | 0     | 0     | Phgr1    |          |
| Phip     | 21780 | 15038 | 12006 | 16096 | 17893 | 22248 | 21245 | 34854 | 27465 | 21457 | 22044 | 25151 | 23414 | 27412 | 21618 | 18303 | 13004 | 15256 | 17379 | 24305 | 21823 | 20633 | 25475 | 19632 | 25574 | 17394 | 27502 | 24733 | Phip     |          |
| Phka1    | 1716  | 1255  | 1216  | 1132  | 1384  | 1459  | 1310  | 1556  | 1652  | 1586  | 1899  | 1537  | 1486  | 1413  | 1472  | 1502  | 1325  | 1339  | 1313  | 1212  | 1320  | 1507  | 1600  | 1460  | 1410  | 1569  | 1485  | 1340  | Phka1    |          |
| Phka2    | 4104  | 3885  | 2829  | 2873  | 2765  | 3469  | 3213  | 2742  | 2683  | 2455  | 2487  | 2989  | 2936  | 2916  | 3749  | 3578  | 2706  | 2849  | 2953  | 3218  | 3441  | 2191  | 2629  | 2307  | 2521  | 2334  | 3138  | 2727  | Phka2    |          |
| Phkb     | 4314  | 3688  | 3282  | 3012  | 3264  | 3365  | 3074  | 5178  | 4752  | 4267  | 4543  | 4288  | 4661  | 4461  | 4263  | 3996  | 2977  | 2987  | 2894  | 3739  | 3233  | 4169  | 4810  | 3684  | 3768  | 3808  | 4652  | 4364  | Phkb     |          |
| Phkg1    | 14    | 20    | 12    | 14    | 15    | 28    | 19    | 11    | 11    | 14    | 8     | 13    | 8     | 10    | 11    | 13    | 12    | 18    | 15    | 17    | 13    | 15    | 8     | 9     | 10    | 15    | 10    | 13    | Phkg1    |          |
| Phkg2    | 3542  | 4267  | 3850  | 4420  | 3938  | 4008  | 4121  | 2999  | 2960  | 3421  | 3021  | 3320  | 3239  | 3338  | 3504  | 3428  | 4204  | 3974  | 4304  | 3986  | 4125  | 3337  | 2963  | 3441  | 3369  | 3363  | 3242  | 3369  | Phkg2    |          |
| Phlda1   | 794   | 843   | 1069  | 1196  | 1492  | 933   | 870   | 1377  | 1472  | 1833  | 2052  | 1072  | 1471  | 1014  | 808   | 1001  | 1082  | 1069  | 1177  | 944   | 978   | 1604  | 1664  | 1447  | 1370  | 1313  | 886   | 869   | Phlda1   |          |
| Phlda2   | 42    | 29    | 19    | 18    | 11    | 14    | 6     | 13    | 25    | 14    | 62    | 9     | 23    | 6     | 17    | 30    | 28    | 31    | 23    | 7     | 1     | 17    | 43    | 8     | 23    | 15    | 17    | 7     | Phlda2   |          |
| Phlda3   | 449   | 386   | 453   | 297   | 418   | 429   | 260   | 470   | 568   | 486   | 584   | 398   | 438   | 337   | 316   | 424   | 448   | 352   | 426   | 324   | 282   | 338   | 711   | 554   | 357   | 494   | 482   | 360   | Phlda3   |          |
| Phldb1   | 7171  | 9503  | 10468 | 10124 | 10538 | 10064 | 8995  | 7527  | 9354  | 10387 | 10111 | 11280 | 10578 | 10167 | 7119  | 8904  | 10454 | 9858  | 10956 | 8975  | 9246  | 10686 | 8730  | 10835 | 11312 | 9757  | 10524 | 9990  | Phldb1   |          |
| Phldb2   | 8059  | 6258  | 7134  | 4304  | 4271  | 5910  | 3950  | 7238  | 7969  | 6720  | 9437  | 8617  | 10816 | 8713  | 7470  | 8835  | 5439  | 5001  | 3854  | 4357  | 3858  | 5250  | 8896  | 7276  | 5639  | 8367  | 9747  | 9404  | Phldb2   |          |
| Phldb3   | 242   | 328   | 268   | 300   | 150   | 156   | 137   | 53    | 95    | 78    | 35    | 26    | 24    | 16    | 195   | 273   | 338   | 254   | 156   | 129   | 155   | 13    | 121   | 52    | 7     | 68    | 20    | 21    | Phldb3   |          |
| Phlpp1   | 4009  | 4196  | 4156  | 4886  | 5339  | 4712  | 5301  | 3678  | 3423  | 3989  | 3351  | 4502  | 3724  | 4379  | 4050  | 3597  | 4854  | 5082  | 5291  | 4255  | 5117  | 3967  | 3193  | 3843  | 4299  | 3866  | 3918  | 4342  | Phlpp1   |          |
| Phlpp2   | 3128  | 2822  | 2467  | 2990  | 3502  | 3663  | 3360  | 3742  | 3727  | 3532  | 4015  | 3652  | 3711  | 3812  | 2800  | 2634  | 2658  | 2982  | 3434  | 3199  | 3404  | 3541  | 3418  | 3335  | 3995  | 2678  | 3810  | 3824  | Phlpp2   |          |
| Phospho1 | 5     | 6     | 4     | 0     | 2     | 2     | 0     | 0     | 0     | 12    | 3     | 0     | 0     | 2     | 1     | 4     | 0     | 0     | 6     | 2     | 1     | 3     | 0     | 7     | 1     | 0     | 0     | 3     | 0        | Phospho1 |
| Phospho2 | 2649  | 2524  | 2465  | 2587  | 2472  | 2300  | 2946  | 2639  | 1996  | 1833  | 1668  | 1972  | 1953  | 2107  | 3098  | 2527  | 2575  | 2424  | 2731  | 3082  | 2780  | 2102  | 2067  | 1849  | 1983  | 2082  | 1945  | 2159  | Phospho2 |          |
| Phox2a   | 38    | 44    | 76    | 39    | 84    | 35    | 22    | 50    | 44    | 54    | 103   | 11    | 65    | 1     | 82    | 44    | 70    | 43    | 26    | 33    | 23    | 77    | 83    | 8     | 20    | 0     | 7     | 6     | Phox2a   |          |
| Phox2b   | 52    | 244   | 98    | 172   | 548   | 231   | 19    | 843   | 700   | 1025  | 724   | 55    | 1218  | 34    | 525   | 377   | 300   | 180   | 51    | 115   | 32    | 1054  | 632   | 32    | 204   | 2     | 43    | 59    | Phox2b   |          |
| Phpt1    | 62    | 68    | 95    | 86    | 128   | 68    | 111   | 95    | 82    | 159   | 126   | 130   | 115   | 118   | 50    | 38    | 125   | 67    | 126   | 90    | 119   | 155   | 89    | 151   | 122   | 98    | 95    | 138   | Phpt1    |          |
| Phr1f    | 7004  | 8330  | 9571  | 9816  | 8404  | 8219  | 7638  | 6737  | 8122  | 9391  | 8615  | 10987 | 9254  | 9832  | 6643  | 8174  | 9763  | 8902  | 9245  | 6578  | 7669  | 9331  | 7438  | 10276 | 9716  | 9687  | 9399  | 9946  | Phr1f    |          |
| Phr1f    | 4180  | 3622  | 3674  | 2998  | 3656  | 3577  | 3501  | 6013  | 5397  | 5200  | 5074  | 5827  | 5503  | 6157  | 4142  | 4582  | 3334  | 3103  | 3324  | 3756  | 3502  | 5243  | 5205  | 5276  | 5277  | 5665  | 5721  | 6159  | Phr1f    |          |
| Phr2f    | 4898  | 3960  | 4132  | 4620  | 4637  | 4827  | 5339  | 3596  | 3034  | 2865  | 2956  | 3130  | 2823  | 3364  | 4742  | 4277  | 4429  | 4790  | 4541  | 5064  | 5111  | 3364  | 2849  | 3109  | 3344  | 2887  | 3011  | 3043  | Phr2f    |          |
| Phr2x    | 0     | 0     | 0     | 0     | 0     | 0     | 0     | 0     | 0     | 0     | 0     | 0     | 0     | 0     | 0     | 0     | 0     | 0     | 0     | 3     | 0     | 0     | 0     | 0     | 2     | 0     | 0     | 0     | Phr2x    |          |
| Phyh     | 1164  | 1056  | 1152  | 1081  | 1208  | 1045  | 1209  | 1623  | 1599  | 1604  | 1632  | 1553  | 1674  | 1610  | 1284  | 1134  | 1137  | 1073  | 1036  | 1055  | 1030  | 1681  | 1658  | 1423  | 1395  | 1597  | 1462  | 1530  | Phyh     |          |
| Phyhd1   | 81    | 114   | 112   | 143   | 154   | 127   | 183   | 140   | 115   | 131   | 100   | 93    | 82    | 144   | 74    | 96    | 140   | 201   | 170   | 115   | 176   | 130   | 82    | 136   | 128   | 86    | 80    | 144   | Phyhd1   |          |
| Phyhp    | 240   | 244   | 188   | 236   | 301   | 245   | 278   | 123   | 157   | 142   | 134   | 117   | 134   | 121   | 196   | 239   | 210   | 255   | 288   | 253   | 294   | 94    | 160   | 189   | 114   | 236   | 134   | 88    | Phyhp    |          |
| Phyhipl  | 2102  | 2445  | 2430  | 3930  | 5657  | 3936  | 4550  | 3783  | 3269  | 3816  | 3100  | 2763  | 3023  | 2842  | 2991  | 2079  | 3396  | 4193  | 4480  | 4063  | 4824  | 5048  | 3106  | 3001  | 3686  | 2168  | 2269  | 2582  | Phyhipl  |          |
| Phykp1   | 426   | 407   | 448   | 430   | 401   | 438   | 393   | 502   | 473   | 467   | 570   | 513   | 569   | 479   | 485   | 449   | 469   | 465   | 399   | 356   | 397   | 455   | 537   | 507   | 515   | 459   | 608   | 496   | Phykp1   |          |
| PI15     | 20    | 10    | 14    | 12    | 16    | 15    | 12    | 46    | 59    | 69    | 86    | 27    | 41    | 15    | 15    | 17    | 7     | 28    | 9     | 17    | 20    | 70    | 166   | 42    | 34    | 25    | 27    | 13    | PI15     |          |
| PI16     | 45    | 60    | 93    | 97    | 70    | 81    | 76    | 136   | 154   | 125   | 125   | 162   | 147   | 152   | 71    | 65    | 54    | 62    | 85    | 60    | 85    | 160   | 162   | 146   | 178   | 222   | 157   | 177   | PI16     |          |
| PI4k2a   | 7414  | 9014  | 7451  | 9033  | 7252  | 7573  | 7399  | 3367  | 3560  | 3914  | 3600  | 4043  | 3669  | 3522  | 7279  | 7983  | 8362  | 8851  | 7827  | 7086  | 7345  | 3673  | 3520  | 3672  | 3739  | 4114  | 3791  | 3785  | PI4k2a   |          |
| PI4k2b   | 4744  | 3534  | 4511  | 3777  | 2536  | 3206  | 3376  | 1594  | 1460  | 1537  | 1752  | 1694  | 1850  | 1807  | 4336  | 4315  | 3734  | 3417  | 2854  | 3395  | 2966  | 1275  | 1752  | 1481  | 1324  | 1918  | 1888  | 1835  | PI4k2b   |          |
| PI4ka    | 9844  | 10551 | 8848  | 11444 | 13136 | 12197 | 12350 | 10232 | 10491 | 11573 | 10175 | 11416 | 10218 | 11062 | 9882  | 9783  | 10185 | 12128 | 12695 | 10681 | 13201 | 12277 | 9846  | 10440 | 12836 | 7586  | 10544 | 10473 | PI4ka    |          |
| PI4kb    | 3981  | 4545  | 3664  | 4014  | 3667  | 3934  | 3631  | 4252  | 4412  | 4077  | 4112  | 4238  | 3993  | 3930  | 4209  | 3921  | 3823  | 3795  | 3811  | 3748  | 3674  | 4055  | 4441  | 3730  | 4089  | 4156  | 4063  | 4012  | PI4kb    |          |
| PIanp    | 659   | 767   | 807   | 1277  | 2144  | 1463  | 1588  | 977   | 1237  | 1575  | 1407  |       |       |       |       |       |       |       |       |       |       |       |       |       |       |       |       |       |          |          |





|          |       |       |       |       |       |       |       |       |       |       |       |       |       |       |       |       |       |       |       |       |       |       |       |       |       |        |       |        |          |
|----------|-------|-------|-------|-------|-------|-------|-------|-------|-------|-------|-------|-------|-------|-------|-------|-------|-------|-------|-------|-------|-------|-------|-------|-------|-------|--------|-------|--------|----------|
| Pkdrej   | 6     | 8     | 6     | 9     | 11    | 6     | 6     | 29    | 46    | 60    | 45    | 38    | 24    | 36    | 8     | 5     | 9     | 21    | 6     | 8     | 7     | 22    | 41    | 29    | 36    | 35     | 24    | 38     | Pkdrej   |
| Pkhd1    | 7     | 4     | 0     | 0     | 4     | 3     | 0     | 2     | 11    | 2     | 32    | 4     | 16    | 5     | 8     | 2     | 7     | 1     | 1     | 2     | 0     | 7     | 41    | 0     | 0     | 1      | 0     | 4      | Pkhd1    |
| Pkhd11   | 295   | 375   | 197   | 79    | 44    | 75    | 56    | 123   | 101   | 56    | 42    | 162   | 611   | 380   | 290   | 325   | 88    | 47    | 53    | 103   | 34    | 35    | 92    | 37    | 39    | 186    | 360   | 720    | Pkhd11   |
| Pkia     | 14956 | 12455 | 11509 | 17737 | 24649 | 22346 | 25107 | 23651 | 18929 | 18417 | 16852 | 14715 | 13794 | 16030 | 19726 | 13284 | 15058 | 19486 | 21685 | 24775 | 24153 | 22987 | 19506 | 15368 | 19765 | 12359  | 14234 | 15053  | Pkia     |
| Pkib     | 59    | 48    | 68    | 42    | 54    | 45    | 36    | 74    | 54    | 49    | 80    | 131   | 138   | 90    | 63    | 51    | 63    | 47    | 66    | 71    | 64    | 47    | 96    | 110   | 86    | 64     | 151   | 140    | Pkib     |
| Pkigr    | 2147  | 2667  | 2663  | 2305  | 2210  | 2117  | 2508  | 1835  | 1943  | 1995  | 1952  | 2284  | 1893  | 2386  | 2090  | 2108  | 2553  | 2181  | 2473  | 2422  | 2513  | 1648  | 1855  | 2388  | 2125  | 2666   | 2067  | 2416   | Pkigr    |
| PkIr     | 25    | 41    | 53    | 11    | 10    | 7     | 9     | 23    | 36    | 18    | 19    | 43    | 46    | 38    | 46    | 84    | 32    | 22    | 9     | 22    | 5     | 12    | 26    | 15    | 11    | 53     | 38    | 212    | PkIr     |
| Pkm      | 82060 | 95258 | 90877 | 87704 | 69900 | 75565 | 72846 | 66474 | 72188 | 75938 | 67459 | 86519 | 83722 | 96318 | 75689 | 73456 | 94264 | 74549 | 88402 | 77763 | 81103 | 54049 | 67379 | 87533 | 76714 | 100515 | 96241 | 100822 | Pkm      |
| Pkmyt1   | 1732  | 1683  | 2015  | 1792  | 1141  | 1426  | 1519  | 1018  | 1313  | 1132  | 1237  | 1787  | 1436  | 1686  | 1266  | 1502  | 1860  | 1606  | 1571  | 1174  | 1322  | 988   | 1098  | 1481  | 1267  | 2187   | 1622  | 1661   | Pkmyt1   |
| Pkn1     | 6973  | 8356  | 8499  | 10426 | 10737 | 8798  | 9080  | 6105  | 7219  | 9236  | 8115  | 8730  | 7643  | 7827  | 6492  | 7668  | 9634  | 10823 | 11247 | 8012  | 10151 | 8971  | 6935  | 9926  | 9474  | 8363   | 7897  | 7917   | Pkn1     |
| Pkn2     | 12482 | 9714  | 10453 | 9934  | 9484  | 10624 | 11418 | 10345 | 9166  | 8396  | 8685  | 9933  | 9509  | 10225 | 11991 | 11062 | 9799  | 9928  | 9934  | 11343 | 10450 | 8238  | 8935  | 8478  | 8672  | 9488   | 10373 | 10329  | Pkn2     |
| Pkn3     | 511   | 616   | 862   | 535   | 458   | 428   | 372   | 492   | 541   | 602   | 617   | 855   | 877   | 724   | 409   | 548   | 745   | 483   | 567   | 450   | 399   | 449   | 530   | 696   | 570   | 918    | 832   | 763    | Pkn3     |
| Pknox1   | 2285  | 2538  | 2277  | 2704  | 2923  | 2609  | 2810  | 2567  | 2704  | 2805  | 2894  | 2533  | 2479  | 2579  | 2362  | 1979  | 2284  | 2835  | 2812  | 2425  | 2745  | 2545  | 2910  | 2612  | 2838  | 2545   | 2475  | 2459   | Pknox1   |
| Pknox2   | 3864  | 4560  | 4602  | 4413  | 4461  | 4142  | 3747  | 2847  | 2970  | 3543  | 3650  | 3658  | 3400  | 3484  | 4240  | 4164  | 4271  | 3979  | 4348  | 3836  | 3719  | 3808  | 3241  | 3391  | 3351  | 3896   | 3813  | 3774   | Pknox2   |
| Pkp1     | 113   | 67    | 38    | 9     | 5     | 51    | 1     | 342   | 684   | 301   | 231   | 65    | 153   | 84    | 57    | 45    | 9     | 61    | 9     | 2     | 0     | 10    | 801   | 186   | 37    | 22     | 65    | 96     | Pkp1     |
| Pkp2     | 1791  | 1595  | 1494  | 1112  | 663   | 760   | 807   | 325   | 243   | 186   | 181   | 169   | 240   | 193   | 1668  | 1627  | 1152  | 888   | 726   | 979   | 715   | 190   | 291   | 271   | 117   | 342    | 221   | 267    | Pkp2     |
| Pkp3     | 217   | 138   | 132   | 31    | 12    | 91    | 1     | 274   | 525   | 159   | 219   | 114   | 191   | 78    | 119   | 192   | 42    | 84    | 16    | 4     | 2     | 17    | 528   | 173   | 33    | 119    | 79    | 127    | Pkp3     |
| Pkp4     | 10048 | 9830  | 9787  | 11363 | 11338 | 10775 | 11270 | 5707  | 6075  | 6310  | 6168  | 6442  | 5896  | 5983  | 9480  | 1961  | 10153 | 11433 | 12047 | 10183 | 11180 | 5750  | 6091  | 6367  | 6161  | 6801   | 6144  | 5661   | Pkp4     |
| Pla1a    | 9     | 11    | 12    | 12    | 21    | 8     | 15    | 22    | 28    | 16    | 13    | 14    | 20    | 17    | 16    | 9     | 15    | 22    | 9     | 15    | 15    | 18    | 23    | 7     | 27    | 15     | 24    | 19     | Pla1a    |
| Pla2g10  | 0     | 1     | 1     | 0     | 2     | 0     | 6     | 0     | 7     | 1     | 11    | 9     | 2     | 3     | 1     | 2     | 1     | 11    | 1     | 0     | 0     | 2     | 10    | 7     | 3     | 2      | 7     | 2      | Pla2g10  |
| Pla2g12a | 978   | 914   | 793   | 964   | 848   | 794   | 1030  | 686   | 752   | 868   | 738   | 775   | 762   | 933   | 899   | 838   | 847   | 1017  | 898   | 947   | 843   | 747   | 741   | 805   | 819   | 950    | 757   | 876    | Pla2g12a |
| Pla2g12b | 0     | 0     | 1     | 0     | 0     | 0     | 0     | 0     | 2     | 3     | 2     | 1     | 3     | 0     | 0     | 0     | 0     | 0     | 0     | 0     | 0     | 2     | 0     | 0     | 2     | 2      | 2     | 0      | Pla2g12b |
| Pla2g15  | 1189  | 1514  | 1578  | 1648  | 1534  | 1337  | 1295  | 1009  | 1242  | 1228  | 1313  | 1266  | 1227  | 1154  | 1273  | 1447  | 1559  | 1784  | 1677  | 1330  | 1308  | 1233  | 1221  | 1312  | 1329  | 1502   | 1145  | 1188   | Pla2g15  |
| Pla2g1b  | 0     | 6     | 1     | 0     | 0     | 4     | 2     | 0     | 1     | 0     | 0     | 0     | 1     | 1     | 3     | 5     | 3     | 1     | 2     | 1     | 3     | 2     | 1     | 0     | 0     | 0      | 1     | 0      | Pla2g1b  |
| Pla2g2c  | 18    | 19    | 8     | 15    | 10    | 12    | 13    | 29    | 16    | 10    | 3     | 12    | 35    | 27    | 24    | 12    | 9     | 20    | 20    | 14    | 9     | 18    | 21    | 12    | 12    | 19     | 23    | 21     | Pla2g2c  |
| Pla2g2d  | 2     | 6     | 3     | 6     | 11    | 9     | 3     | 13    | 19    | 27    | 21    | 10    | 25    | 10    | 7     | 4     | 20    | 0     | 6     | 8     | 2     | 10    | 17    | 9     | 8     | 2      | 12    | 12     | Pla2g2d  |
| Pla2g2e  | 0     | 1     | 0     | 0     | 0     | 0     | 0     | 0     | 1     | 0     | 0     | 0     | 0     | 0     | 3     | 2     | 0     | 0     | 2     | 0     | 0     | 0     | 1     | 0     | 1     | 1      | 2     | 0      | Pla2g2e  |
| Pla2g2f  | 15    | 16    | 38    | 1     | 1     | 9     | 6     | 13    | 23    | 13    | 10    | 18    | 8     | 11    | 7     | 11    | 13    | 15    | 4     | 22    | 2     | 5     | 47    | 9     | 6     | 4      | 10    | 14     | Pla2g2f  |
| Pla2g3   | 131   | 163   | 106   | 109   | 164   | 141   | 153   | 112   | 135   | 131   | 125   | 118   | 141   | 95    | 129   | 108   | 79    | 130   | 125   | 142   | 153   | 117   | 106   | 154   | 175   | 182    | 117   | 134    | Pla2g3   |
| Pla2g4a  | 720   | 430   | 281   | 180   | 173   | 273   | 115   | 553   | 659   | 407   | 618   | 384   | 449   | 353   | 539   | 695   | 222   | 255   | 103   | 142   | 107   | 353   | 828   | 415   | 186   | 411    | 315   | 328    | Pla2g4a  |
| Pla2g4b  | 338   | 333   | 414   | 489   | 519   | 502   | 498   | 477   | 467   | 696   | 527   | 654   | 648   | 651   | 261   | 314   | 457   | 464   | 566   | 402   | 463   | 692   | 460   | 713   | 678   | 175    | 668   | 573    | Pla2g4b  |
| Pla2g4c  | 653   | 602   | 724   | 776   | 806   | 790   | 939   | 458   | 369   | 530   | 459   | 595   | 500   | 603   | 599   | 777   | 721   | 795   | 839   | 760   | 879   | 428   | 326   | 500   | 520   | 550    | 594   | 586    | Pla2g4c  |
| Pla2g4d  | 8     | 2     | 0     | 1     | 1     | 1     | 1     | 3     | 2     | 3     | 5     | 3     | 4     | 4     | 4     | 3     | 4     | 1     | 0     | 2     | 3     | 5     | 6     | 2     | 6     | 0      | 0     | 0      | Pla2g4d  |
| Pla2g4e  | 2     | 7     | 8     | 19    | 77    | 61    | 34    | 72    | 111   | 80    | 99    | 39    | 43    | 40    | 16    | 9     | 5     | 46    | 31    | 48    | 38    | 114   | 80    | 37    | 80    | 24     | 33    | 18     | Pla2g4e  |
| Pla2g4f  | 12    | 29    | 9     | 22    | 27    | 23    | 29    | 10    | 7     | 3     | 1     | 5     | 7     | 10    | 28    | 40    | 36    | 15    | 25    | 14    | 19    | 3     | 19    | 6     | 3     | 16     | 2     | 7      | Pla2g4f  |
| Pla2g5   | 9     | 5     | 6     | 4     | 10    | 3     | 11    | 16    | 21    | 13    | 23    | 20    | 24    | 14    | 5     | 3     | 13    | 8     | 12    | 14    | 13    | 2     | 18    | 10    | 6     | 15     | 12    | 19     | Pla2g5   |
| Pla2g6   | 1727  | 2659  | 2675  | 2903  | 2669  | 2377  | 2271  | 2003  | 2310  | 2656  | 2353  | 2672  | 2496  | 2409  | 1928  | 2016  | 2824  | 2731  | 3089  | 2245  | 2479  | 2859  | 2174  | 2817  | 2671  | 2320   | 2635  | 2477   | Pla2g6   |
| Pla2g7   | 296   | 338   | 287   | 239   | 853   | 374   | 254   | 725   | 830   | 653   | 831   | 222   | 448   | 251   | 488   | 372   | 265   | 384   | 294   | 339   | 242   | 974   | 1226  | 286   | 409   | 204    | 241   | 236    | Pla2g7   |
| Pla2r1   | 728   | 376   | 309   | 320   | 204   | 311   | 129   | 680   | 460   | 540   | 406   | 172   | 285   | 191   | 413   | 595   | 192   | 229   | 122   | 185   | 139   | 144   | 623   | 547   | 132   | 546    | 198   | 140    | Pla2r1   |
| Plaa     | 10302 | 8235  | 9012  | 8582  | 8980  | 9136  | 9850  | 9987  | 8370  | 7605  | 7779  | 9715  | 9112  | 9528  | 10963 | 9512  | 8807  | 8853  | 8110  | 9880  | 9281  | 8936  | 8385  | 8442  | 8609  | 9580   | 9783  | 9772   | Plaa     |
| Plaatt1  | 76    | 77    | 114   | 90    | 151   | 97    | 129   | 142   | 118   | 97    | 104   | 87    | 90    | 73    | 102   | 83    | 87    | 95    | 111   | 114   | 94    | 149   | 134   | 106   | 129   | 104    | 108   | 65     | Plaatt1  |
| Plaatt3  | 442   | 381   | 308   | 273   | 271   | 357   | 325   | 316   | 379   | 291   | 318   | 265   | 316   | 280   | 364   | 433   | 307   | 282   | 306   | 398   | 291   | 264   | 417   | 337   | 324   | 444    | 296   | 244    | Plaatt3  |
| Plaatt5  | 2     | 1     | 0     | 4     | 2     | 1     | 4     | 0     | 0     | 0     | 0     | 0     | 0     | 0     | 2     | 2     | 1     | 1     | 3     | 3     | 0     | 5     | 2     | 0     | 3     | 0      | 0     | 0      | Plaatt5  |
| Plac1    | 35    | 24    | 41    | 18    | 19    | 27    | 6     | 35    | 53    | 33    | 80    | 25    | 27    | 17    | 25    | 26    | 19    | 21    | 10    | 16    | 11    | 20    | 52    | 20    | 31    | 35     | 28    | 30     | Plac1    |
| Plac8    | 58    | 49    | 32    | 21    | 21    | 27    | 17    | 61    | 56    | 27    | 70    | 26    | 41    | 10    | 69    | 88    | 13    | 35    | 12    | 31    | 11    | 33    | 85    | 45    | 21    | 41     | 30    | 31     | Plac8    |
| Plac81   | 0     | 2     | 0     | 0     | 3     | 1     | 2     | 0     | 0     | 0     | 0     | 3     | 5     | 3     | 3     | 2     | 0     | 0     | 0     | 0     | 1     | 0     | 0     | 2     | 4     | 0      | 2     | 1      | Plac81   |
| Plac9a   | 1     | 0     | 0     | 0     | 0     | 1     | 0     | 2     | 1     | 1     | 4     | 0     | 1     | 1     | 3     | 1     | 0     | 0     | 0     | 0     | 1     | 2     | 2     | 2     | 0     | 4      | 0     | 1      | Plac9a   |
| Plag1    | 3284  | 2498  | 1880  | 2414  | 2257  | 2960  | 2708  | 1743  | 1734  | 1428  | 1806  | 1587  | 1786  | 1592  | 3078  | 2833  | 2048  | 2368  | 2113  | 2762  | 2565  | 1298  | 1608  | 1241  | 1291  | 851    | 1703  | 1561   | Plag1    |
| Plag11   | 27633 | 24402 | 25665 | 23255 | 19581 | 24130 | 23711 | 17696 | 19550 | 16956 | 32752 | 22225 | 19635 | 21417 | 25423 | 22881 | 24987 | 23916 | 21646 | 22749 | 23109 | 18616 | 25873 | 17958 | 17505 | 21453  | 22984 | 22275  | Plag11   |
| Plag12   | 6413  | 6769  | 7463  | 6218  | 4840  | 5370  | 5569  | 4542  | 4358  | 4513  | 4286  | 6993  | 5822  | 6479  | 5885  | 6650  | 6778  | 5853  | 5657  | 4831  | 5474  | 4523  | 4037  | 5656  | 4788  | 6449   | 6326  | 7195   | Plag12   |
| Plat     | 5425  | 5855  | 5715  | 4837  | 5150  | 4724  | 3900  | 3285  | 3360  | 3185  | 3470  | 2994  | 3530  | 3034  | 5272  | 5839  | 5184  | 4830  | 4647  | 4926  | 4245  | 3293  | 4115  | 3166  | 2922  | 3687   | 3552  | 3037   | Plat     |
| Plat25   | 2662  | 1976  | 2859  | 2507  | 2861  | 2682  | 3152  | 2904  | 2635  | 2539  | 2748  | 2682  | 2577  | 2709  | 2769  | 2599  | 2763  | 2601  | 2840  | 2678  | 2691  | 27    |       |       |       |        |       |        |          |

|         |      |      |       |      |       |       |       |       |      |       |       |       |       |       |       |      |       |       |       |       |       |       |       |       |       |      |       |         |         |         |
|---------|------|------|-------|------|-------|-------|-------|-------|------|-------|-------|-------|-------|-------|-------|------|-------|-------|-------|-------|-------|-------|-------|-------|-------|------|-------|---------|---------|---------|
| Pld5    | 35   | 41   | 45    | 52   | 155   | 68    | 44    | 192   | 214  | 291   | 285   | 191   | 299   | 175   | 78    | 50   | 38    | 73    | 72    | 70    | 73    | 373   | 287   | 166   | 228   | 131  | 143   | 184     | Pld5    |         |
| Pld6    | 57   | 27   | 47    | 39   | 41    | 49    | 31    | 50    | 59   | 47    | 43    | 51    | 48    | 34    | 58    | 50   | 44    | 51    | 45    | 23    | 44    | 42    | 56    | 53    | 71    | 59   | 51    | 61      | Pld6    |         |
| Plec    | 6910 | 9604 | 10598 | 9591 | 8483  | 8437  | 5893  | 4501  | 5828 | 6303  | 7333  | 5598  | 6873  | 4731  | 6711  | 9444 | 10492 | 9682  | 7995  | 6352  | 6596  | 6259  | 6399  | 5762  | 5419  | 3291 | 5832  | 5375    | Plec    |         |
| Plek    | 796  | 504  | 652   | 412  | 452   | 480   | 407   | 1016  | 925  | 728   | 878   | 862   | 1174  | 852   | 708   | 880  | 447   | 454   | 346   | 564   | 407   | 999   | 1096  | 840   | 661   | 1084 | 952   | 779     | Plek    |         |
| Plek2   | 105  | 103  | 75    | 64   | 38    | 63    | 61    | 78    | 97   | 82    | 52    | 88    | 332   | 142   | 80    | 99   | 66    | 46    | 61    | 78    | 48    | 53    | 103   | 69    | 56    | 135  | 131   | 218     | Plek2   |         |
| Plekha1 | 8412 | 8326 | 9451  | 9851 | 12078 | 10377 | 10451 | 11323 | 9269 | 10185 | 10019 | 8804  | 9647  | 8929  | 10486 | 9801 | 10039 | 10181 | 10402 | 11159 | 10681 | 12287 | 9514  | 8959  | 11172 | 6467 | 8881  | 8302    | Plekha1 |         |
| Plekha2 | 644  | 461  | 578   | 288  | 466   | 364   | 226   | 631   | 611  | 649   | 793   | 366   | 831   | 424   | 694   | 800  | 445   | 335   | 239   | 268   | 248   | 787   | 733   | 357   | 383   | 439  | 372   | 369     | Plekha2 |         |
| Plekha3 | 2400 | 2129 | 2503  | 2427 | 2467  | 2489  | 2605  | 1789  | 1735 | 1635  | 1795  | 1955  | 1772  | 2015  | 2391  | 2263 | 2328  | 2533  | 2433  | 2187  | 2522  | 1885  | 1651  | 1865  | 1789  | 2063 | 1887  | 1900    | Plekha3 |         |
| Plekha4 | 89   | 107  | 91    | 123  | 173   | 80    | 65    | 169   | 339  | 373   | 618   | 104   | 249   | 113   | 90    | 170  | 117   | 95    | 67    | 68    | 67    | 453   | 433   | 169   | 251   | 166  | 95    | 109     | Plekha4 |         |
| Plekha5 | 3262 | 3172 | 3750  | 3563 | 4584  | 4080  | 3871  | 6826  | 7003 | 7445  | 7397  | 7342  | 7485  | 7239  | 3303  | 3187 | 3586  | 3372  | 4187  | 3652  | 3949  | 7798  | 6321  | 7142  | 7545  | 6130 | 6972  | 7335    | Plekha5 |         |
| Plekha6 | 4279 | 5362 | 6218  | 6928 | 8782  | 7369  | 6814  | 8349  | 7523 | 10545 | 9078  | 11941 | 10637 | 11008 | 5006  | 4896 | 7130  | 6906  | 8265  | 6200  | 7443  | 12626 | 7306  | 10229 | 12023 | 6729 | 11766 | 11192   | Plekha6 |         |
| Plekha7 | 3683 | 4606 | 4621  | 4577 | 3842  | 4173  | 4008  | 1502  | 1721 | 1920  | 1522  | 2562  | 2254  | 2394  | 3580  | 3833 | 4898  | 4066  | 4437  | 3786  | 3995  | 1360  | 1726  | 2172  | 1918  | 2289 | 2488  | 2527    | Plekha7 |         |
| Plekha8 | 7934 | 6707 | 6436  | 6860 | 6102  | 6894  | 6888  | 5040  | 4907 | 4566  | 4625  | 5017  | 5158  | 5362  | 7195  | 7636 | 6446  | 6726  | 6151  | 6220  | 6871  | 4600  | 4343  | 4690  | 5117  | 4915 | 5398  | 5473    | Plekha8 |         |
| Plekhh1 | 193  | 249  | 97    | 137  | 234   | 145   | 101   | 267   | 381  | 293   | 380   | 205   | 268   | 148   | 305   | 229  | 129   | 185   | 171   | 147   | 114   | 369   | 369   | 195   | 210   | 221  | 202   | 163     | Plekhh1 |         |
| Plekhh2 | 4299 | 4978 | 4466  | 4701 | 5062  | 4540  | 4800  | 2927  | 2764 | 2851  | 2554  | 2953  | 2513  | 2918  | 4362  | 4171 | 4831  | 4524  | 5224  | 5184  | 4854  | 2949  | 2720  | 2813  | 2986  | 2770 | 2919  | 3010    | Plekhh2 |         |
| Plekhd1 | 293  | 333  | 310   | 333  | 533   | 312   | 201   | 350   | 290  | 304   | 359   | 238   | 456   | 261   | 336   | 414  | 367   | 387   | 341   | 357   | 275   | 530   | 261   | 209   | 385   | 57   | 292   | 299     | Plekhd1 |         |
| Plekfh1 | 591  | 725  | 644   | 649  | 431   | 467   | 380   | 93    | 161  | 129   | 135   | 121   | 113   | 76    | 484   | 668  | 597   | 540   | 509   | 544   | 413   | 87    | 148   | 105   | 110   | 125  | 117   | 85      | Plekfh1 |         |
| Plekfh2 | 2007 | 1680 | 1902  | 1848 | 1547  | 1596  | 1780  | 1660  | 1587 | 1522  | 1545  | 1538  | 1448  | 1546  | 1958  | 1850 | 1695  | 1661  | 1547  | 1548  | 1628  | 1275  | 1621  | 1644  | 1429  | 1790 | 1447  | 1658    | Plekfh2 |         |
| Plekhg1 | 2148 | 1658 | 1949  | 1376 | 1500  | 1689  | 1198  | 3075  | 3327 | 3194  | 3565  | 3240  | 4183  | 3472  | 1811  | 1920 | 1566  | 1407  | 1379  | 1510  | 1319  | 3130  | 3956  | 3027  | 2727  | 2778 | 3841  | 3674    | Plekhg1 |         |
| Plekhg2 | 4385 | 5840 | 7110  | 5989 | 5920  | 5489  | 4883  | 5192  | 6483 | 6751  | 7347  | 8593  | 8224  | 7526  | 4067  | 5503 | 7095  | 6119  | 6469  | 4540  | 5019  | 6154  | 6237  | 8088  | 6574  | 8978 | 7951  | 7852    | Plekhg2 |         |
| Plekhg3 | 1015 | 1053 | 1120  | 831  | 870   | 922   | 489   | 684   | 1092 | 975   | 1230  | 689   | 912   | 524   | 841   | 1182 | 991   | 973   | 778   | 582   | 573   | 794   | 1474  | 898   | 605   | 624  | 557   | 565     | Plekhg3 |         |
| Plekhg4 | 1115 | 1598 | 1393  | 2070 | 2376  | 2087  | 2044  | 382   | 413  | 581   | 462   | 492   | 371   | 476   | 1221  | 1425 | 1921  | 2447  | 2358  | 1896  | 2147  | 590   | 397   | 449   | 524   | 343  | 446   | 432     | Plekhg4 |         |
| Plekhg5 | 1445 | 1572 | 1762  | 1632 | 1739  | 1540  | 1362  | 1121  | 1468 | 1563  | 1696  | 1429  | 1399  | 1319  | 1120  | 1603 | 1737  | 1657  | 1932  | 1223  | 1425  | 1464  | 1465  | 1578  | 1326  | 1702 | 1219  | 1173    | Plekhg5 |         |
| Plekhg6 | 115  | 85   | 84    | 59   | 39    | 62    | 16    | 38    | 40   | 36    | 23    | 15    | 29    | 20    | 70    | 116  | 75    | 55    | 22    | 32    | 13    | 12    | 59    | 34    | 10    | 19   | 20    | 14      | Plekhg6 |         |
| Plekhh1 | 1747 | 1836 | 2218  | 1874 | 1983  | 1760  | 1607  | 1511  | 1489 | 1537  | 1673  | 2159  | 2190  | 1999  | 1725  | 1732 | 2027  | 1721  | 1946  | 1564  | 1694  | 1527  | 1325  | 1622  | 1706  | 1558 | 2260  | 2261    | Plekhh1 |         |
| Plekhh2 | 2748 | 2249 | 1913  | 1826 | 1787  | 2074  | 1819  | 1209  | 1519 | 1250  | 2181  | 956   | 1327  | 1020  | 2418  | 2848 | 1870  | 1723  | 1623  | 1944  | 1891  | 1076  | 1799  | 1068  | 988   | 972  | 1187  | 1044    | Plekhh2 |         |
| Plekhh3 | 1187 | 1707 | 1418  | 1886 | 1614  | 1514  | 1388  | 458   | 562  | 620   | 586   | 678   | 562   | 513   | 1195  | 1359 | 1859  | 1921  | 1747  | 1315  | 1490  | 695   | 649   | 626   | 628   | 661  | 575   | 540     | Plekhh3 |         |
| Plekjh1 | 1844 | 2217 | 2514  | 2369 | 2095  | 2050  | 2213  | 1887  | 2032 | 2560  | 2280  | 2569  | 2371  | 2849  | 1834  | 1717 | 2381  | 2041  | 2343  | 1906  | 2246  | 2012  | 2126  | 2826  | 2370  | 3026 | 2753  | 2864    | Plekjh1 |         |
| Plekhm1 | 3152 | 4141 | 3828  | 4177 | 3671  | 3501  | 3394  | 1727  | 2130 | 2351  | 2237  | 2488  | 2193  | 2260  | 2875  | 3881 | 4241  | 4357  | 3879  | 2766  | 3503  | 2722  | 1961  | 2161  | 2377  | 2635 | 2151  | 2162    | 2258    | Plekhm1 |
| Plekhm2 | 1415 | 1708 | 2011  | 2049 | 2243  | 1949  | 1672  | 2179  | 2752 | 3018  | 3027  | 2813  | 2758  | 2478  | 1315  | 1749 | 1997  | 1955  | 2202  | 1528  | 1793  | 2968  | 2693  | 3045  | 3052  | 2857 | 2525  | 2553    | Plekhm2 |         |
| Plekhm3 | 1337 | 1533 | 927   | 1376 | 1585  | 1367  | 1363  | 1380  | 1551 | 1514  | 1390  | 1358  | 1606  | 1341  | 1422  | 1520 | 1229  | 1349  | 1322  | 1313  | 1467  | 1569  | 1299  | 1176  | 1546  | 744  | 1386  | 1246    | Plekhm3 |         |
| Plekhn1 | 5591 | 7061 | 5556  | 6874 | 7093  | 6902  | 6472  | 4880  | 5710 | 5952  | 5782  | 5687  | 5304  | 5071  | 5731  | 5863 | 6102  | 7069  | 7203  | 6653  | 6558  | 5701  | 5009  | 5493  | 5775  | 4371 | 5348  | 4774    | Plekhn1 |         |
| Plekho1 | 2074 | 2749 | 2857  | 2632 | 2966  | 2989  | 2546  | 4332  | 4880 | 4614  | 4388  | 5472  | 4613  | 5354  | 2124  | 2213 | 2986  | 2291  | 3439  | 2716  | 2628  | 4614  | 5246  | 5184  | 6149  | 5108 | 5196  | Plekho1 |         |         |
| Plekho2 | 2600 | 3389 | 2805  | 2805 | 1997  | 2245  | 1804  | 865   | 1018 | 921   | 1236  | 1064  | 1089  | 979   | 2575  | 3485 | 2719  | 2861  | 2103  | 1632  | 1886  | 854   | 1202  | 945   | 833   | 1200 | 1117  | 1094    | Plekho2 |         |
| Plekhs1 | 15   | 4    | 5     | 10   | 21    | 3     | 18    | 28    | 36   | 45    | 27    | 11    | 28    | 23    | 12    | 11   | 14    | 7     | 2     | 6     | 18    | 37    | 37    | 37    | 14    | 34   | 23    | 11      | Plekhs1 |         |
| Plet1   | 7    | 15   | 14    | 7    | 12    | 8     | 9     | 12    | 25   | 30    | 29    | 4     | 10    | 6     | 18    | 16   | 2     | 1     | 14    | 5     | 5     | 17    | 13    | 11    | 25    | 9    | 30    | 11      | Plet1   |         |
| Plg     | 6    | 1    | 3     | 2    | 13    | 6     | 3     | 6     | 12   | 0     | 1     | 1     | 8     | 5     | 3     | 6    | 12    | 8     | 4     | 3     | 6     | 5     | 4     | 7     | 12    | 13   | 0     | 4       | Plg     |         |
| Plgrkt  | 2718 | 2556 | 2328  | 2629 | 2375  | 2562  | 2839  | 2677  | 2314 | 2269  | 2094  | 2054  | 2064  | 2279  | 2813  | 2624 | 2396  | 2542  | 2512  | 2925  | 2693  | 2339  | 2184  | 2165  | 2437  | 2218 | 2123  | 2192    | Plgrkt  |         |
| Plin1   | 3    | 3    | 4     | 6    | 9     | 0     | 10    | 5     | 7    | 3     | 2     | 4     | 3     | 4     | 8     | 5    | 0     | 12    | 2     | 6     | 8     | 5     | 4     | 2     | 2     | 7    | 1     | 4       | Plin1   |         |
| Plin2   | 1713 | 1748 | 1764  | 1126 | 1460  | 1374  | 1092  | 2949  | 3200 | 2521  | 2958  | 2824  | 3182  | 2733  | 1759  | 1899 | 1680  | 1126  | 1430  | 1501  | 1070  | 2595  | 3666  | 2673  | 2270  | 3125 | 3483  | 3114    | Plin2   |         |
| Plin3   | 4188 | 4261 | 4138  | 2968 | 2249  | 2693  | 2133  | 2295  | 2739 | 2045  | 2645  | 2165  | 2683  | 2101  | 3791  | 4298 | 3588  | 2826  | 2532  | 2488  | 2164  | 1728  | 3304  | 2025  | 1556  | 2786 | 2230  | 2270    | Plin3   |         |
| Plin4   | 7    | 6    | 14    | 11   | 11    | 10    | 9     | 6     | 15   | 3     | 9     | 5     | 11    | 2     | 7     | 9    | 5     | 14    | 3     | 12    | 10    | 10    | 10    | 8     | 4     | 4    | 7     | 0       | Plin4   |         |
| Plin5   | 6    | 17   | 7     | 23   | 10    | 15    | 13    | 5     | 7    | 8     | 8     | 3     | 2     | 2     | 13    | 14   | 23    | 15    | 6     | 12    | 4     | 12    | 14    | 9     | 13    | 3    | 9     | 1       | Plin5   |         |
| Plk1    | 2561 | 2934 | 3784  | 2712 | 2077  | 2259  | 2172  | 2712  | 3401 | 3410  | 3240  | 5755  | 4572  | 5392  | 2207  | 2630 | 3532  | 2129  | 2867  | 1939  | 2207  | 2705  | 2871  | 4819  | 3583  | 7379 | 5055  | 5620    | Plk1    |         |
| Plk2    | 6921 | 6021 | 4939  | 5978 | 5439  | 5940  | 5041  | 9856  | 9199 | 8720  | 8676  | 7306  | 8453  | 7085  | 7054  | 6891 | 4779  | 6309  | 5041  | 5069  | 5170  | 9608  | 10174 | 8505  | 8180  | 8792 | 6966  | 7575    | Plk2    |         |
| Plk3    | 899  | 1356 | 1454  | 1622 | 1448  | 1260  | 1127  | 768   | 840  | 950   | 821   | 1503  | 1648  | 1292  | 1076  | 1220 | 1568  | 1391  | 1463  | 1199  | 1196  | 956   | 744   | 1046  | 966   | 1325 | 1436  | 1423    | Plk3    |         |
| Plk4    | 603  | 116  | 131   | 170  | 70    | 158   | 108   | 670   | 145  | 106   | 145   | 442   | 176   | 295   | 394   | 202  | 76    | 103   | 122   | 190   | 93    | 162   | 233   | 118   | 167   | 248  | 238   | 529     | Plk4    |         |
| Plk5    | 135  | 103  | 76    | 120  | 79    | 69    | 114   | 34    | 29   | 40    | 20    | 17    | 20    | 20    | 90    | 121  | 103   | 102   | 131   | 86    | 73    | 40    | 35    | 34    | 23    | 20   | 17    | 20      | Plk5    |         |
| Pllp    | 120  | 119  | 99    | 131  | 114   | 74    | 67    | 17    | 21   | 17    | 38    | 26    | 14    | 13    | 105   | 108  | 119   | 146   | 100   | 94    | 96    | 12    | 18    | 35    | 12    |      |       |         |         |         |

|         |       |       |       |       |       |       |       |       |       |       |       |       |       |       |       |       |       |       |       |       |       |       |       |       |       |       |       |        |         |
|---------|-------|-------|-------|-------|-------|-------|-------|-------|-------|-------|-------|-------|-------|-------|-------|-------|-------|-------|-------|-------|-------|-------|-------|-------|-------|-------|-------|--------|---------|
| Plxdc2  | 1975  | 1681  | 1727  | 1232  | 1505  | 1510  | 1149  | 1950  | 2071  | 1837  | 2475  | 1551  | 2251  | 1403  | 1916  | 2069  | 1223  | 1457  | 1036  | 1271  | 1155  | 2035  | 2601  | 1424  | 1527  | 1445  | 1859  | 1767   | Pldxc2  |
| Plxna1  | 17168 | 22874 | 22999 | 28583 | 29355 | 26358 | 25228 | 16291 | 18947 | 23034 | 19508 | 24691 | 21975 | 21435 | 17689 | 22120 | 28763 | 29235 | 30400 | 22132 | 26476 | 26406 | 17547 | 23387 | 24818 | 14431 | 20549 | 21836  | Plxna1  |
| Plxna2  | 10663 | 11391 | 6576  | 13873 | 21042 | 19847 | 22087 | 17167 | 21754 | 23216 | 20406 | 19314 | 13110 | 20398 | 11819 | 10504 | 11143 | 15888 | 18955 | 15949 | 22685 | 19281 | 15360 | 19172 | 27832 | 11733 | 14559 | 13830  | Plxna2  |
| Plxna3  | 15759 | 20645 | 15086 | 22782 | 24209 | 21900 | 22910 | 14004 | 16270 | 18176 | 15013 | 16040 | 14870 | 14738 | 16736 | 17979 | 20296 | 25161 | 24068 | 19484 | 23077 | 20112 | 13740 | 16047 | 19193 | 9135  | 14405 | 13316  | Plxna3  |
| Plxna4  | 3377  | 3677  | 2136  | 5072  | 9624  | 7511  | 8079  | 8281  | 10567 | 11223 | 10199 | 7067  | 6763  | 7370  | 3932  | 3896  | 3177  | 6323  | 6770  | 5547  | 8191  | 10537 | 7538  | 7719  | 13664 | 3634  | 5721  | 5158   | Plxna4  |
| Plxnb1  | 8755  | 11148 | 13978 | 13223 | 14472 | 13554 | 11558 | 17319 | 18871 | 23440 | 18817 | 29170 | 23618 | 24362 | 9058  | 9111  | 14443 | 11809 | 15756 | 11279 | 12571 | 21309 | 16971 | 25908 | 25303 | 18749 | 25913 | 24525  | Plxnb1  |
| Plxnb2  | 24082 | 28273 | 27165 | 26744 | 24234 | 24540 | 21349 | 17723 | 22360 | 23395 | 22701 | 26003 | 24010 | 21910 | 21663 | 27951 | 26963 | 26311 | 26690 | 20292 | 22847 | 23609 | 23060 | 24512 | 22445 | 21891 | 22954 | 23193  | Plxnb2  |
| Plxnb3  | 18    | 14    | 9     | 9     | 41    | 22    | 7     | 40    | 80    | 66    | 151   | 30    | 75    | 21    | 13    | 24    | 2     | 5     | 7     | 13    | 95    | 143   | 37    | 39    | 25    | 20    | 17    | Plxnb3 |         |
| Plknc1  | 2836  | 2725  | 2587  | 3438  | 5141  | 4461  | 5336  | 5268  | 5397  | 5597  | 4746  | 4926  | 3446  | 5247  | 2860  | 2398  | 3283  | 3857  | 4795  | 4389  | 5235  | 7088  | 5084  | 5498  | 6890  | 3729  | 4296  | 4358   | Plknc1  |
| Plknd1  | 5274  | 6994  | 6929  | 7189  | 5383  | 6793  | 6004  | 4258  | 6646  | 6665  | 7367  | 5960  | 6098  | 5131  | 4638  | 7302  | 6662  | 7980  | 7178  | 5402  | 6600  | 5897  | 6117  | 6955  | 6653  | 6474  | 5283  | 4536   | Plknd1  |
| Pm20d1  | 74    | 71    | 121   | 29    | 50    | 32    | 28    | 16    | 37    | 18    | 18    | 52    | 41    | 35    | 65    | 96    | 60    | 37    | 22    | 29    | 20    | 22    | 38    | 25    | 18    | 35    | 48    | 42     | Pm20d1  |
| Pm20d2  | 110   | 74    | 51    | 53    | 109   | 120   | 99    | 156   | 177   | 154   | 148   | 133   | 159   | 107   | 65    | 58    | 34    | 47    | 61    | 74    | 86    | 135   | 197   | 135   | 173   | 72    | 128   | 120    | Pm20d2  |
| Pmaip1  | 1718  | 1193  | 1684  | 884   | 488   | 837   | 548   | 298   | 279   | 258   | 253   | 357   | 278   | 315   | 1325  | 1632  | 1055  | 1019  | 535   | 654   | 505   | 180   | 274   | 287   | 184   | 381   | 351   | 488    | Pmaip1  |
| Pmch    | 51    | 37    | 15    | 115   | 77    | 129   | 192   | 136   | 96    | 60    | 66    | 101   | 12    | 109   | 44    | 31    | 57    | 90    | 117   | 210   | 162   | 137   | 105   | 96    | 114   | 125   | 49    | 66     | Pmch    |
| Pmel    | 194   | 87    | 55    | 17    | 29    | 92    | 11    | 125   | 309   | 124   | 215   | 93    | 124   | 36    | 123   | 164   | 30    | 70    | 30    | 13    | 22    | 69    | 230   | 111   | 64    | 94    | 63    | 50     | Pmel    |
| Pmepa1  | 1250  | 1602  | 2008  | 2222  | 2284  | 2145  | 1857  | 1823  | 2050  | 2631  | 3046  | 2347  | 2211  | 2324  | 1363  | 1757  | 2199  | 2572  | 2192  | 1395  | 2095  | 2717  | 2227  | 2865  | 2884  | 2289  | 2112  | 2309   | Pmepa1  |
| Pmf1    | 1429  | 1620  | 1723  | 1326  | 1006  | 1213  | 1250  | 1652  | 1903  | 1726  | 1877  | 2566  | 2312  | 2743  | 1195  | 1371  | 1392  | 1078  | 1283  | 1233  | 1122  | 1370  | 1650  | 2297  | 2112  | 3265  | 2779  | 2993   | Pmf1    |
| Pmfbp1  | 240   | 385   | 367   | 467   | 645   | 538   | 304   | 606   | 452   | 572   | 476   | 407   | 756   | 364   | 434   | 477   | 498   | 413   | 429   | 544   | 375   | 707   | 411   | 305   | 541   | 122   | 466   | 396    | Pmfbp1  |
| Pmsi2   | 0     | 0     | 0     | 0     | 0     | 0     | 1     | 0     | 0     | 0     | 2     | 0     | 0     | 0     | 0     | 0     | 0     | 0     | 0     | 0     | 0     | 0     | 0     | 0     | 0     | 0     | 0     | 0      | Pmsi2   |
| Pml     | 1644  | 1857  | 2103  | 1606  | 1410  | 1455  | 1301  | 1191  | 1587  | 1512  | 1765  | 1834  | 1768  | 1487  | 1485  | 2053  | 1875  | 1735  | 1820  | 1326  | 1361  | 1293  | 1654  | 1778  | 1401  | 2071  | 1527  | 1593   | Pml     |
| Pmm1    | 2369  | 3098  | 2416  | 2589  | 2431  | 2459  | 2290  | 1288  | 1743  | 1419  | 1382  | 1257  | 1247  | 1284  | 2416  | 2799  | 2533  | 2678  | 2582  | 2642  | 2405  | 1297  | 1618  | 1511  | 1573  | 1512  | 1361  | 1247   | Pmm1    |
| Pmm2    | 1671  | 1615  | 1428  | 1295  | 1527  | 1707  | 1573  | 3094  | 3129  | 3107  | 3088  | 3312  | 3241  | 3338  | 1497  | 1319  | 1350  | 1343  | 1668  | 1660  | 1566  | 2959  | 2990  | 2981  | 3207  | 3069  | 3171  | 3309   | Pmm2    |
| Pmp22   | 1023  | 1079  | 1100  | 553   | 781   | 915   | 419   | 1784  | 2551  | 1707  | 2992  | 1289  | 2207  | 1225  | 1262  | 1314  | 753   | 917   | 554   | 674   | 420   | 2445  | 3105  | 1489  | 1691  | 1269  | 1583  | 1424   | Pmp22   |
| Pmpca   | 9323  | 9377  | 9363  | 8611  | 7907  | 8079  | 8651  | 8774  | 8217  | 9027  | 8406  | 9648  | 8921  | 9520  | 8664  | 8963  | 9028  | 8636  | 8604  | 8019  | 8533  | 9546  | 8389  | 8945  | 8836  | 10072 | 9648  | 9875   | Pmpca   |
| Pmpcb   | 4771  | 4407  | 3973  | 3799  | 3542  | 3664  | 4216  | 5959  | 5011  | 4533  | 4308  | 5454  | 4568  | 5494  | 4638  | 3755  | 4118  | 3762  | 4005  | 4315  | 4123  | 4714  | 5060  | 5105  | 4814  | 5613  | 5176  | 5905   | Pmpcb   |
| Pms1    | 1678  | 1158  | 1335  | 1107  | 1149  | 1211  | 1207  | 1236  | 1220  | 981   | 1081  | 1212  | 1198  | 1261  | 1742  | 1406  | 1285  | 1150  | 1166  | 1386  | 1197  | 993   | 1190  | 1222  | 1107  | 1522  | 1369  | 1297   | Pms1    |
| Pms2    | 3283  | 2989  | 2406  | 2567  | 2303  | 2580  | 2626  | 2209  | 1932  | 1906  | 2008  | 2146  | 1867  | 2136  | 2959  | 2718  | 2432  | 2415  | 2314  | 2564  | 2707  | 1902  | 1963  | 1844  | 2035  | 1843  | 2135  | 2209   | Pms2    |
| Pmrvk   | 2789  | 3694  | 3572  | 3518  | 3149  | 2781  | 2976  | 2249  | 2151  | 2352  | 2256  | 2641  | 2635  | 2479  | 3137  | 2963  | 3946  | 3416  | 3447  | 3502  | 2929  | 2421  | 2175  | 2814  | 2745  | 2825  | 2599  | 2648   | Pmrvk   |
| Pnck    | 1476  | 1851  | 1484  | 2306  | 3203  | 2356  | 2600  | 2047  | 2328  | 2514  | 2159  | 1627  | 1453  | 1646  | 1586  | 1432  | 2126  | 2582  | 2756  | 2755  | 2744  | 2749  | 2289  | 2265  | 2667  | 1530  | 1464  | 1324   | Pnck    |
| Pnlsr   | 16559 | 13924 | 16514 | 17705 | 20058 | 19898 | 20975 | 37530 | 31375 | 32903 | 34540 | 34976 | 33530 | 39960 | 17102 | 14711 | 17329 | 17019 | 19458 | 20930 | 21234 | 34086 | 29914 | 33748 | 34994 | 28040 | 35697 | 35251  | Pnlsr   |
| Pnk4    | 4142  | 5245  | 4877  | 5537  | 5228  | 4461  | 4457  | 2425  | 3148  | 3014  | 3413  | 3272  | 3139  | 3040  | 4064  | 4749  | 5395  | 5560  | 4956  | 3914  | 4475  | 3078  | 2979  | 3179  | 3267  | 3617  | 2788  | 2815   | Pnk4    |
| Pnkp    | 1803  | 2286  | 2301  | 2184  | 1964  | 1959  | 1970  | 1307  | 1534  | 1603  | 1439  | 1730  | 1677  | 1657  | 1783  | 1960  | 2174  | 2125  | 2157  | 1893  | 1958  | 1440  | 1409  | 1664  | 1740  | 1782  | 1790  | 1785   | Pnkp    |
| Pnldc1  | 167   | 191   | 185   | 202   | 242   | 272   | 240   | 258   | 304   | 325   | 241   | 292   | 304   | 309   | 164   | 190   | 217   | 253   | 229   | 192   | 186   | 276   | 201   | 302   | 280   | 279   | 286   | 288    | Pnldc1  |
| Pnlip   | 0     | 0     | 0     | 3     | 1     | 3     | 2     | 5     | 5     | 1     | 10    | 1     | 2     | 1     | 0     | 3     | 0     | 4     | 0     | 2     | 4     | 5     | 11    | 2     | 0     | 1     | 1     | 1      | Pnlip   |
| Pnlipr1 | 1     | 3     | 0     | 5     | 0     | 0     | 3     | 7     | 2     | 0     | 3     | 1     | 2     | 1     | 4     | 3     | 0     | 4     | 2     | 10    | 2     | 12    | 14    | 5     | 4     | 2     | 3     | 9      | Pnlipr1 |
| Pnlipr2 | 1     | 4     | 3     | 7     | 1     | 0     | 7     | 4     | 6     | 10    | 3     | 3     | 5     | 2     | 1     | 1     | 1     | 0     | 1     | 1     | 10    | 2     | 7     | 5     | 2     | 0     | 0     | 2      | Pnlipr2 |
| Pnma1   | 103   | 110   | 124   | 100   | 117   | 90    | 133   | 183   | 161   | 154   | 173   | 182   | 152   | 149   | 87    | 96    | 121   | 107   | 132   | 122   | 110   | 179   | 151   | 189   | 241   | 211   | 141   | 176    | Pnma1   |
| Pnma2   | 3662  | 4301  | 3733  | 4046  | 5021  | 4700  | 4512  | 2142  | 1848  | 1906  | 1668  | 1509  | 1455  | 1563  | 4258  | 3682  | 4422  | 4375  | 4537  | 4993  | 4824  | 2420  | 1733  | 1526  | 2221  | 1258  | 1399  | 1341   | Pnma2   |
| Pnma3   | 381   | 409   | 430   | 509   | 920   | 620   | 639   | 712   | 713   | 931   | 749   | 855   | 659   | 797   | 413   | 353   | 473   | 636   | 631   | 565   | 641   | 1046  | 682   | 818   | 1030  | 693   | 723   | 659    | Pnma3   |
| Pnma5   | 1     | 1     | 2     | 3     | 2     | 4     | 3     | 4     | 2     | 5     | 2     | 2     | 1     | 5     | 0     | 0     | 2     | 12    | 2     | 3     | 3     | 3     | 1     | 3     | 3     | 3     | 2     | 2      | Pnma5   |
| Pnma11  | 2531  | 3092  | 2521  | 3804  | 4414  | 3992  | 4603  | 4437  | 3756  | 3993  | 3007  | 4011  | 2786  | 4093  | 2979  | 2217  | 3228  | 3714  | 4358  | 4440  | 4627  | 4752  | 3832  | 3927  | 4709  | 3384  | 3529  | 3849   | Pnma11  |
| Pnma12  | 6766  | 8940  | 10049 | 16386 | 19388 | 16237 | 16260 | 8674  | 10119 | 14445 | 12708 | 11084 | 8145  | 10710 | 7776  | 7328  | 14368 | 17574 | 18235 | 13610 | 17234 | 15493 | 10172 | 13548 | 16349 | 9779  | 8458  | 8923   | Pnma12  |
| Pnmt    | 5     | 4     | 0     | 0     | 16    | 1     | 2     | 10    | 25    | 14    | 49    | 0     | 12    | 3     | 3     | 2     | 2     | 4     | 4     | 5     | 0     | 17    | 22    | 0     | 4     | 0     | 1     | 0      | Pnmt    |
| Pnn     | 16766 | 15018 | 22670 | 20401 | 18128 | 17915 | 19945 | 20955 | 18276 | 22999 | 21804 | 24977 | 22654 | 29197 | 16763 | 15144 | 20702 | 18358 | 18529 | 18956 | 19164 | 20543 | 17582 | 25713 | 23149 | 27686 | 25330 | 26601  | Pnn     |
| Pno1    | 3816  | 3320  | 3505  | 2827  | 2234  | 2530  | 2809  | 2164  | 1911  | 1618  | 1792  | 2152  | 2062  | 2489  | 3816  | 3248  | 3036  | 2360  | 2365  | 3067  | 2667  | 1724  | 1965  | 1967  | 1807  | 2597  | 2305  | 2656   | Pno1    |
| Pnoc    | 138   | 193   | 189   | 247   | 417   | 345   | 337   | 710   | 597   | 820   | 689   | 983   | 932   | 1021  | 153   | 140   | 250   | 232   | 447   | 385   | 375   | 1068  | 547   | 926   | 1031  | 451   | 1022  | 994    | Pnoc    |
| Pnp     | 847   | 786   | 805   | 596   | 457   | 457   | 628   | 574   | 564   | 431   | 449   | 573   | 516   | 738   | 781   | 694   | 644   | 474   | 472   | 709   | 553   | 419   | 576   | 506   | 420   | 689   | 652   | 794    | Pnp     |
| Pnp2    | 22    | 4     | 35    | 9     | 26    | 15    | 13    | 9     | 12    | 3     | 13    | 5     | 7     | 20    | 14    | 3     | 19    | 14    | 12    | 16    | 15    | 12    | 8     | 10    | 10    | 8     | 11    | Pnp2   |         |
| Pnp1a1  | 6     | 7     | 0     | 14    | 1     | 4</   |       |       |       |       |       |       |       |       |       |       |       |       |       |       |       |       |       |       |       |       |       |        |         |



|          |       |       |       |       |       |       |       |       |       |       |       |       |       |       |       |       |       |       |       |       |       |       |       |       |       |       |       |       |          |        |
|----------|-------|-------|-------|-------|-------|-------|-------|-------|-------|-------|-------|-------|-------|-------|-------|-------|-------|-------|-------|-------|-------|-------|-------|-------|-------|-------|-------|-------|----------|--------|
| Pold3    | 6367  | 6070  | 5974  | 5057  | 5120  | 5419  | 5715  | 6018  | 5674  | 5611  | 5129  | 6972  | 5746  | 6927  | 5734  | 5563  | 5722  | 4927  | 5559  | 5644  | 5580  | 4968  | 5146  | 6279  | 5542  | 7760  | 7045  | 6965  | Pold3    |        |
| Pold4    | 5     | 1     | 1     | 2     | 1     | 2     | 1     | 0     | 2     | 0     | 3     | 0     | 3     | 0     | 3     | 2     | 1     | 3     | 2     | 1     | 2     | 0     | 1     | 0     | 1     | 1     | 5     | 1     | Pold4    |        |
| Poldip2  | 4861  | 5403  | 4775  | 4984  | 5184  | 5418  | 5427  | 5365  | 6139  | 6175  | 6251  | 6191  | 5880  | 6259  | 4659  | 4521  | 5215  | 4824  | 5479  | 5067  | 5400  | 5604  | 5855  | 6024  | 6317  | 6652  | 6143  | 6278  | Poldip2  |        |
| Poldip3  | 7472  | 8542  | 8408  | 8021  | 7696  | 7570  | 7616  | 9106  | 9704  | 9416  | 9279  | 10666 | 9612  | 10149 | 7142  | 7172  | 8565  | 7900  | 8691  | 7730  | 7704  | 9459  | 9569  | 10328 | 9886  | 11149 | 10550 | 11055 | Poldip3  |        |
| Pole     | 8734  | 7665  | 5339  | 5886  | 4521  | 5969  | 6129  | 5327  | 5896  | 4508  | 4917  | 7477  | 6091  | 6866  | 7100  | 6812  | 5275  | 4944  | 5294  | 5975  | 5713  | 3695  | 4946  | 5083  | 4577  | 5576  | 7906  | 7056  | Pole     |        |
| Pole2    | 1256  | 941   | 1192  | 789   | 633   | 715   | 805   | 985   | 887   | 789   | 776   | 1082  | 913   | 1115  | 1187  | 932   | 933   | 767   | 733   | 996   | 785   | 625   | 797   | 959   | 776   | 1285  | 1128  | 1221  | Pole2    |        |
| Pole3    | 8722  | 8815  | 9296  | 8044  | 6446  | 7188  | 7719  | 5412  | 4791  | 4756  | 4691  | 6127  | 5726  | 6392  | 8774  | 7656  | 8056  | 7208  | 7642  | 8587  | 7324  | 4177  | 4654  | 5460  | 5398  | 7159  | 6645  | 6761  | Pole3    |        |
| Pole4    | 1690  | 1422  | 1865  | 1562  | 1807  | 1566  | 1878  | 2969  | 2766  | 2483  | 2497  | 2631  | 2510  | 2900  | 1773  | 1439  | 1676  | 1714  | 1709  | 1740  | 1780  | 2765  | 2764  | 2735  | 2542  | 3127  | 2786  | 2913  | Pole4    |        |
| Polg     | 8420  | 9717  | 8828  | 10245 | 8919  | 9314  | 9523  | 4218  | 4629  | 4821  | 4652  | 5460  | 5071  | 5166  | 8190  | 8737  | 9250  | 10255 | 9973  | 8008  | 9615  | 4674  | 4354  | 5285  | 5169  | 5242  | 4979  | 5122  | Polg     |        |
| Polg2    | 890   | 853   | 776   | 939   | 662   | 726   | 765   | 552   | 583   | 680   | 601   | 596   | 685   | 627   | 787   | 794   | 790   | 919   | 739   | 742   | 703   | 633   | 599   | 584   | 600   | 673   | 589   | 605   | Polg2    |        |
| Polh     | 2722  | 2642  | 2446  | 2299  | 1897  | 2156  | 2170  | 1964  | 1892  | 1830  | 1840  | 1942  | 2028  | 2109  | 2422  | 2739  | 2289  | 2534  | 1936  | 1915  | 2163  | 1546  | 1969  | 2041  | 1794  | 2319  | 2023  | 2095  | Polh     |        |
| Poli     | 890   | 960   | 781   | 946   | 803   | 905   | 1005  | 978   | 999   | 1128  | 949   | 1022  | 1001  | 1018  | 893   | 878   | 980   | 1022  | 931   | 948   | 932   | 971   | 983   | 923   | 986   | 1113  | 1049  | 943   | Poli     |        |
| Polk     | 2561  | 2056  | 1745  | 2184  | 1965  | 2165  | 2036  | 1326  | 1270  | 1066  | 1217  | 1033  | 1169  | 1077  | 2371  | 2412  | 1914  | 2238  | 1744  | 2225  | 2079  | 946   | 1234  | 1055  | 865   | 1021  | 1091  | 1104  | Polk     |        |
| Poll     | 873   | 1084  | 1125  | 807   | 767   | 703   | 745   | 813   | 1002  | 983   | 933   | 1122  | 1123  | 1127  | 818   | 970   | 977   | 726   | 882   | 768   | 760   | 812   | 958   | 1075  | 952   | 1408  | 1135  | 1129  | Poll     |        |
| Polm     | 915   | 1089  | 1136  | 978   | 985   | 999   | 957   | 701   | 897   | 802   | 855   | 1060  | 1044  | 879   | 839   | 1033  | 1131  | 859   | 1027  | 869   | 830   | 862   | 910   | 1017  | 798   | 1050  | 1011  | 980   | Polm     |        |
| Poln     | 326   | 306   | 173   | 237   | 153   | 231   | 254   | 88    | 110   | 49    | 71    | 94    | 101   | 102   | 289   | 323   | 184   | 215   | 156   | 227   | 208   | 84    | 79    | 68    | 73    | 91    | 107   | 68    | Poln     |        |
| Polq     | 3572  | 3078  | 2500  | 1991  | 1669  | 2342  | 2453  | 5286  | 2347  | 1872  | 1721  | 2532  | 2273  | 2763  | 3219  | 3184  | 2015  | 1746  | 1811  | 2852  | 2347  | 1255  | 1964  | 1672  | 2051  | 1774  | 2934  | 2504  | Polq     |        |
| Polr1a   | 6387  | 6664  | 5216  | 5572  | 4935  | 5735  | 5009  | 5299  | 6044  | 5495  | 5752  | 5911  | 6501  | 5797  | 5847  | 6796  | 5172  | 5438  | 5065  | 5142  | 5408  | 4769  | 5612  | 5378  | 5355  | 5725  | 6353  | 6442  | Polr1a   |        |
| Polr1b   | 3516  | 3488  | 3492  | 3665  | 3324  | 3428  | 3441  | 2773  | 3184  | 3130  | 3112  | 3339  | 3309  | 3248  | 3224  | 3306  | 3414  | 3562  | 3525  | 3008  | 3511  | 2901  | 2740  | 3174  | 3336  | 3601  | 3285  | 3405  | Polr1b   |        |
| Polr1c   | 3703  | 4412  | 4447  | 3968  | 3080  | 3172  | 2994  | 3957  | 3911  | 3997  | 3731  | 4325  | 3898  | 4063  | 3440  | 3709  | 4109  | 3627  | 4030  | 3749  | 3423  | 3188  | 4022  | 4092  | 3858  | 5108  | 4685  | 4345  | Polr1c   |        |
| Polr1d   | 4421  | 5819  | 4685  | 4740  | 4088  | 4177  | 4345  | 3046  | 3078  | 3046  | 3062  | 3293  | 3175  | 3211  | 4450  | 5012  | 4962  | 4734  | 4249  | 4941  | 4729  | 2381  | 3496  | 3595  | 3297  | 3622  | 3492  | 3685  | Polr1d   |        |
| Polr1e   | 3479  | 3907  | 2814  | 3250  | 2796  | 2966  | 3099  | 1048  | 1331  | 1293  | 1314  | 1493  | 1465  | 1441  | 3376  | 3382  | 3024  | 3156  | 2893  | 3198  | 3170  | 1138  | 1303  | 1361  | 1293  | 1654  | 1582  | 1663  | Polr1e   |        |
| Polr1f   | 4501  | 3197  | 3905  | 3471  | 2937  | 3281  | 3191  | 3295  | 2646  | 2369  | 2361  | 2702  | 2802  | 2617  | 4395  | 4224  | 3296  | 3241  | 2903  | 3640  | 3083  | 2622  | 2671  | 2613  | 2424  | 3011  | 2994  | 2941  | Polr1f   |        |
| Polr1h   | 1511  | 1792  | 1785  | 1545  | 1293  | 1313  | 1620  | 1432  | 1581  | 1381  | 1527  | 1549  | 1520  | 1831  | 1510  | 1441  | 1677  | 1448  | 1467  | 1694  | 1507  | 1203  | 1509  | 1691  | 1589  | 1853  | 1694  | 1989  | Polr1h   |        |
| Polr1has | 280   | 224   | 354   | 231   | 233   | 224   | 268   | 271   | 251   | 302   | 246   | 369   | 319   | 378   | 319   | 220   | 379   | 237   | 272   | 286   | 213   | 212   | 252   | 359   | 262   | 394   | 302   | 396   | Polr1has |        |
| Polr2a   | 16473 | 17162 | 19020 | 20139 | 17424 | 16795 | 14997 | 17070 | 20341 | 23592 | 21795 | 30981 | 25311 | 25472 | 15241 | 16916 | 19674 | 19425 | 19132 | 12228 | 16392 | 24132 | 18505 | 26652 | 23737 | 23554 | 24283 | 24163 | Polr2a   |        |
| Polr2b   | 25754 | 25093 | 20433 | 19766 | 16877 | 18634 | 21284 | 14889 | 12414 | 10323 | 9515  | 13309 | 11551 | 13137 | 27265 | 23226 | 19736 | 19550 | 18516 | 23353 | 20210 | 11351 | 11976 | 10846 | 11280 | 12876 | 13279 | 13481 | Polr2b   |        |
| Polr2c   | 3402  | 3883  | 3328  | 3231  | 3082  | 2996  | 3087  | 2635  | 3019  | 2763  | 2610  | 3092  | 2912  | 2994  | 3069  | 3283  | 3377  | 3022  | 3332  | 3248  | 3234  | 2572  | 2865  | 3120  | 2971  | 3523  | 3105  | 3114  | Polr2c   |        |
| Polr2d   | 3834  | 3814  | 3779  | 3468  | 2981  | 3253  | 3703  | 3027  | 2660  | 2473  | 2671  | 3407  | 2975  | 3460  | 3956  | 3524  | 3633  | 3309  | 3256  | 3789  | 3299  | 2630  | 2742  | 3068  | 2850  | 3910  | 3403  | 3690  | Polr2d   |        |
| Polr2e   | 4803  | 6499  | 5468  | 5024  | 3426  | 4064  | 3645  | 2815  | 3102  | 2970  | 2842  | 3353  | 3116  | 3160  | 4287  | 5271  | 4875  | 4223  | 4114  | 4663  | 3847  | 2206  | 3177  | 3189  | 2846  | 4152  | 3435  | 3316  | Polr2e   |        |
| Polr2f   | 2450  | 2972  | 2816  | 2913  | 2293  | 2075  | 2506  | 1793  | 1935  | 1853  | 2001  | 2134  | 2017  | 2366  | 2296  | 2266  | 2844  | 2631  | 2513  | 2545  | 2468  | 1705  | 1783  | 2398  | 2060  | 2669  | 2207  | 2370  | Polr2f   |        |
| Polr2g   | 4212  | 4161  | 4009  | 3934  | 3236  | 3366  | 3700  | 3518  | 3091  | 2978  | 2813  | 3284  | 3176  | 3323  | 4183  | 4012  | 4093  | 3682  | 3317  | 4171  | 3497  | 2973  | 3216  | 3331  | 2986  | 3841  | 3435  | 3405  | Polr2g   |        |
| Polr2h   | 2208  | 2456  | 2304  | 2295  | 1871  | 1874  | 2274  | 1801  | 1706  | 1562  | 1550  | 1699  | 1626  | 1756  | 2325  | 2230  | 2356  | 2161  | 2180  | 2762  | 2229  | 1282  | 1660  | 1699  | 1717  | 2079  | 1868  | 1854  | Polr2h   |        |
| Polr2i   | 746   | 988   | 919   | 929   | 778   | 760   | 889   | 1004  | 957   | 995   | 1080  | 1084  | 1111  | 1257  | 682   | 677   | 895   | 842   | 1001  | 1054  | 847   | 749   | 991   | 1192  | 1144  | 1453  | 1254  | 1158  | Polr2i   |        |
| Polr2j   | 3098  | 3497  | 3291  | 3455  | 2556  | 2836  | 3190  | 2231  | 2160  | 2222  | 2257  | 2361  | 2515  | 2916  | 3100  | 2869  | 3216  | 3013  | 2858  | 3444  | 3008  | 1785  | 2091  | 2621  | 2146  | 2595  | 2991  | 2740  | 2807     | Polr2j |
| Polr2k   | 1914  | 1754  | 2039  | 2172  | 1729  | 1491  | 2529  | 1931  | 1424  | 1833  | 1735  | 1847  | 1827  | 2987  | 2012  | 1504  | 2097  | 1631  | 1663  | 2177  | 2557  | 1501  | 1458  | 2303  | 1901  | 1957  | 2062  | 2881  | Polr2k   |        |
| Polr2l   | 2941  | 4100  | 3837  | 3827  | 2938  | 2328  | 3347  | 1622  | 1811  | 2080  | 2228  | 2232  | 2261  | 2389  | 2863  | 2928  | 3883  | 3425  | 2795  | 3142  | 3104  | 1469  | 1723  | 2323  | 2161  | 2453  | 2119  | 2524  | Polr2l   |        |
| Polr2m   | 13276 | 12481 | 15742 | 12382 | 12391 | 12020 | 12218 | 16861 | 17287 | 18868 | 18849 | 22227 | 19831 | 22723 | 12380 | 12069 | 14709 | 12022 | 12957 | 10603 | 12734 | 17044 | 17926 | 21355 | 18740 | 26399 | 22636 | 23644 | Polr2m   |        |
| Polr2n   | 3209  | 3408  | 1794  | 2004  | 2146  | 2793  | 2271  | 3213  | 3292  | 2537  | 2624  | 2603  | 2453  | 2769  | 3047  | 3175  | 1934  | 1955  | 1967  | 2929  | 2767  | 2169  | 2992  | 3067  | 2260  | 2297  | 3082  | 2624  | Polr2n   |        |
| Polr3a   | 2194  | 2251  | 1896  | 1888  | 2023  | 2046  | 1944  | 3467  | 3425  | 3037  | 3132  | 3194  | 3520  | 3543  | 2165  | 2036  | 1851  | 1812  | 2034  | 2104  | 2038  | 3232  | 3313  | 2926  | 3084  | 2844  | 3540  | 3572  | Polr3a   |        |
| Polr3b   | 3026  | 3190  | 2966  | 3072  | 2611  | 2637  | 2948  | 2545  | 2497  | 2814  | 2474  | 3144  | 2941  | 3245  | 2913  | 2713  | 2943  | 2791  | 2978  | 2816  | 2976  | 2465  | 2509  | 3015  | 2885  | 3583  | 3330  | 3493  | Polr3b   |        |
| Polr3d   | 1351  | 1475  | 1870  | 1758  | 1714  | 1598  | 1560  | 1829  | 2120  | 2123  | 2300  | 2147  | 2008  | 2491  | 1345  | 1386  | 1727  | 1701  | 1672  | 1354  | 1641  | 1902  | 2111  | 2351  | 2185  | 2749  | 2052  | 2528  | Polr3d   |        |
| Polr3e   | 3224  | 3335  | 3400  | 3323  | 3214  | 3617  | 3303  | 2932  | 3119  | 3015  | 3289  | 3378  | 3188  | 3393  | 2956  | 3167  | 3081  | 3303  | 3464  | 3102  | 3337  | 2772  | 2834  | 3140  | 3310  | 3335  | 3298  | 3192  | Polr3e   |        |
| Polr3f   | 5696  | 5114  | 4472  | 4696  | 4335  | 4765  | 5420  | 4941  | 4166  | 3800  | 3939  | 4643  | 4476  | 4883  | 5618  | 5202  | 4573  | 4588  | 4531  | 5076  | 5032  | 4116  | 4086  | 4172  | 4148  | 4248  | 4911  | 4641  | Polr3f   |        |
| Polr3g   | 3107  | 2432  | 2657  | 1736  | 1276  | 1497  | 1476  | 970   | 931   | 838   | 884   | 873   | 1077  | 910   | 2846  | 2999  | 2084  | 1888  | 1274  | 1757  | 1343  | 648   | 1061  | 735   | 546   | 1116  | 947   | 1043  | Polr3g   |        |
| Polr3h   | 2708  | 3219  | 4053  | 4612  | 3844  | 3346  | 3766  | 1673  | 1926  | 2324  | 2189  | 2185  | 1975  | 2138  | 2859  | 3045  | 4569  | 4254  | 4190  | 3214  | 3738  | 2169  | 1934  | 2     |       |       |       |       |          |        |

|          |       |       |       |       |       |       |       |       |       |       |       |       |       |       |       |       |       |       |       |       |       |       |       |       |       |       |       |        |          |      |
|----------|-------|-------|-------|-------|-------|-------|-------|-------|-------|-------|-------|-------|-------|-------|-------|-------|-------|-------|-------|-------|-------|-------|-------|-------|-------|-------|-------|--------|----------|------|
| Pou3f2   | 6634  | 6458  | 12746 | 11851 | 10221 | 10731 | 10488 | 9387  | 6077  | 9203  | 6788  | 13944 | 11482 | 14683 | 8097  | 5720  | 12199 | 10281 | 11398 | 8595  | 11264 | 12074 | 5772  | 11121 | 11914 | 10470 | 15421 | 16581  | Pou3f2   |      |
| Pou3f3   | 12033 | 13504 | 14664 | 17354 | 14198 | 15067 | 16748 | 15069 | 13992 | 15481 | 11715 | 20411 | 15729 | 21616 | 12728 | 8682  | 17415 | 15353 | 16921 | 14567 | 16999 | 14170 | 10035 | 19371 | 18858 | 19102 | 18052 | 19355  | Pou3f3   |      |
| Pou3f4   | 3014  | 4265  | 5721  | 4334  | 4191  | 3865  | 3444  | 2522  | 3100  | 2746  | 5307  | 4976  | 5418  | 3782  | 2918  | 5281  | 3651  | 4708  | 4208  | 4249  | 3823  | 2629  | 4196  | 4342  | 3271  | 6735  | 6380  | Pou3f4 |          |      |
| Pou4f1   | 2009  | 2008  | 3673  | 3501  | 4996  | 3367  | 2541  | 3777  | 2042  | 4735  | 4153  | 4881  | 5871  | 5272  | 2855  | 2355  | 3752  | 3505  | 4126  | 3210  | 3959  | 6082  | 3399  | 4585  | 5100  | 542   | 5302  | 5779   | Pou4f1   |      |
| Pou4f2   | 165   | 173   | 215   | 444   | 760   | 445   | 269   | 416   | 287   | 539   | 462   | 380   | 467   | 295   | 266   | 217   | 394   | 436   | 580   | 447   | 557   | 715   | 467   | 469   | 569   | 7     | 323   | 263    | Pou4f2   |      |
| Pou4f3   | 80    | 96    | 27    | 104   | 171   | 92    | 67    | 189   | 152   | 173   | 129   | 90    | 177   | 61    | 145   | 148   | 81    | 184   | 174   | 96    | 166   | 284   | 107   | 132   | 269   | 5     | 70    | 89     | Pou4f3   |      |
| Pou5f1   | 3     | 1     | 11    | 0     | 2     | 0     | 0     | 2     | 1     | 2     | 3     | 0     | 1     | 1     | 1     | 0     | 1     | 0     | 0     | 2     | 0     | 4     | 3     | 0     | 6     | 0     | 0     | 1      | Pou5f1   |      |
| Pou5f2   | 10    | 19    | 75    | 37    | 16    | 11    | 30    | 13    | 18    | 16    | 9     | 18    | 18    | 16    | 13    | 15    | 24    | 13    | 50    | 4     | 30    | 37    | 6     | 24    | 26    | 76    | 24    | 23     | Pou5f2   |      |
| Pou6f1   | 3084  | 3741  | 3808  | 5039  | 6928  | 6084  | 6007  | 6539  | 7210  | 9342  | 7418  | 9052  | 6815  | 8590  | 3302  | 2477  | 5459  | 5382  | 7354  | 4805  | 6374  | 9787  | 5878  | 9010  | 10524 | 6550  | 7587  | 7472   | Pou6f1   |      |
| Pou6f2   | 223   | 213   | 414   | 498   | 646   | 608   | 523   | 717   | 538   | 836   | 627   | 840   | 759   | 827   | 357   | 332   | 495   | 478   | 720   | 562   | 662   | 1054  | 454   | 843   | 889   | 485   | 846   | 758    | Pou6f2   |      |
| Pp2d1    | 1     | 0     | 0     | 0     | 1     | 1     | 1     | 1     | 1     | 0     | 4     | 0     | 2     | 1     | 1     | 0     | 0     | 2     | 2     | 1     | 4     | 0     | 1     | 1     | 4     | 1     | 1     | 1      | Pp2d1    |      |
| Ppa1     | 7729  | 7162  | 8085  | 6933  | 5893  | 6163  | 7510  | 6064  | 5629  | 5833  | 5214  | 6763  | 5697  | 7207  | 7330  | 6622  | 7473  | 6017  | 7221  | 7372  | 6998  | 5098  | 5456  | 6508  | 5928  | 8440  | 7043  | 7825   | Ppa1     |      |
| Ppa2     | 1369  | 1126  | 1346  | 1300  | 1423  | 1352  | 1568  | 1872  | 1804  | 1731  | 1765  | 1960  | 1714  | 2138  | 1383  | 1144  | 1350  | 1187  | 1485  | 1428  | 1387  | 1766  | 1885  | 1810  | 1801  | 2034  | 1972  | 2091   | Ppa2     |      |
| Ppan     | 1869  | 2424  | 2216  | 2352  | 1633  | 1705  | 1631  | 1679  | 2062  | 2076  | 2262  | 2091  | 2058  | 2122  | 1767  | 2009  | 1977  | 1947  | 1840  | 1726  | 1716  | 1803  | 2192  | 2121  | 2002  | 2604  | 2205  | 2162   | Ppan     |      |
| Ppara    | 102   | 128   | 81    | 90    | 140   | 130   | 112   | 62    | 65    | 44    | 62    | 36    | 60    | 26    | 99    | 110   | 131   | 139   | 143   | 104   | 92    | 50    | 61    | 53    | 42    | 10    | 57    | 50     | Ppara    |      |
| Ppard    | 2336  | 3100  | 3547  | 3230  | 2547  | 2526  | 2274  | 951   | 1210  | 1729  | 1649  | 1395  | 1415  | 1239  | 2056  | 3009  | 3526  | 3130  | 2742  | 1955  | 2313  | 1327  | 1316  | 1478  | 1288  | 1593  | 1292  | 1190   | Ppard    |      |
| Pparg    | 32    | 29    | 26    | 61    | 47    | 51    | 56    | 24    | 20    | 13    | 47    | 1     | 10    | 6     | 21    | 30    | 25    | 68    | 51    | 32    | 58    | 17    | 47    | 21    | 11    | 3     | 5     | 6      | Pparg    |      |
| Ppargc1a | 1483  | 1226  | 1027  | 1602  | 1762  | 1604  | 1669  | 1028  | 1102  | 943   | 980   | 830   | 746   | 675   | 1536  | 1274  | 1225  | 1683  | 1569  | 1673  | 1683  | 1193  | 896   | 765   | 981   | 458   | 772   | 618    | Ppargc1a |      |
| Ppargc1b | 213   | 283   | 194   | 274   | 286   | 269   | 225   | 68    | 154   | 108   | 220   | 74    | 105   | 71    | 208   | 269   | 233   | 314   | 276   | 174   | 207   | 82    | 159   | 94    | 88    | 54    | 103   | 74     | Ppargc1b |      |
| Ppat     | 6298  | 5447  | 5544  | 4835  | 3915  | 4401  | 4939  | 3051  | 5292  | 2515  | 2568  | 3153  | 3002  | 3367  | 6186  | 5823  | 4985  | 5073  | 4325  | 2800  | 4618  | 2176  | 2715  | 2845  | 2473  | 4057  | 3961  | 3841   | Ppat     |      |
| Ppbb     | 271   | 195   | 340   | 99    | 54    | 72    | 68    | 162   | 149   | 135   | 155   | 226   | 323   | 153   | 194   | 321   | 130   | 119   | 50    | 146   | 79    | 155   | 146   | 150   | 62    | 324   | 272   | 157    | Ppbb     |      |
| Ppcdc    | 608   | 609   | 548   | 504   | 569   | 563   | 627   | 1071  | 1054  | 988   | 959   | 1068  | 1100  | 1017  | 574   | 566   | 508   | 533   | 620   | 639   | 575   | 907   | 1007  | 1020  | 1050  | 1162  | 963   | 1042   | Ppcdc    |      |
| Ppcs     | 476   | 485   | 461   | 422   | 383   | 433   | 491   | 513   | 547   | 442   | 424   | 466   | 448   | 396   | 563   | 470   | 439   | 437   | 365   | 504   | 377   | 458   | 526   | 507   | 386   | 583   | 497   | 500    | Ppcs     |      |
| Ppdpf    | 3016  | 3588  | 3405  | 3047  | 3391  | 3108  | 3101  | 3930  | 4254  | 4497  | 4132  | 5118  | 4374  | 4708  | 2830  | 2756  | 3571  | 3036  | 3644  | 3453  | 2951  | 3937  | 4122  | 5009  | 4765  | 5987  | 5063  | 4892   | Ppdpf    |      |
| Ppef1    | 33    | 44    | 34    | 30    | 122   | 34    | 31    | 129   | 130   | 79    | 188   | 29    | 64    | 18    | 80    | 53    | 23    | 85    | 26    | 40    | 37    | 201   | 126   | 25    | 78    | 31    | 33    | 31     | Ppef1    |      |
| Ppef2    | 40    | 37    | 37    | 54    | 66    | 30    | 44    | 39    | 35    | 63    | 21    | 13    | 23    | 14    | 29    | 57    | 22    | 45    | 32    | 46    | 33    | 30    | 40    | 15    | 31    | 17    | 29    | 21     | Ppef2    |      |
| Ppfia1   | 8569  | 9208  | 7957  | 8305  | 7856  | 8238  | 8151  | 6577  | 6795  | 6982  | 6850  | 7849  | 7355  | 7586  | 7837  | 8364  | 8055  | 8490  | 8112  | 7108  | 8570  | 6375  | 6387  | 6940  | 7441  | 6918  | 7633  | 7414   | Ppfia1   |      |
| Ppfia2   | 2347  | 2770  | 1822  | 3867  | 5843  | 4728  | 4876  | 5448  | 4623  | 4465  | 3773  | 3119  | 2765  | 3243  | 3563  | 2412  | 2947  | 4151  | 4733  | 5561  | 5137  | 5812  | 4407  | 3434  | 5045  | 1990  | 2805  | 2613   | Ppfia2   |      |
| Ppfia3   | 2705  | 3545  | 4551  | 4595  | 5250  | 4369  | 4217  | 2450  | 2756  | 3586  | 2857  | 2472  | 5202  | 3041  | 2496  | 2742  | 4990  | 4682  | 5658  | 3754  | 4708  | 3816  | 2532  | 3361  | 3905  | 2671  | 2607  | 2766   | Ppfia3   |      |
| Ppfia4   | 1485  | 1822  | 1563  | 2086  | 2891  | 2405  | 1941  | 1180  | 1592  | 1729  | 2544  | 1069  | 1308  | 1013  | 1563  | 2093  | 1874  | 2464  | 2225  | 1891  | 2174  | 1770  | 1825  | 1061  | 1553  | 794   | 1078  | 921    | Ppfia4   |      |
| Ppfbp1   | 9352  | 7747  | 7360  | 5834  | 5106  | 6081  | 5950  | 4443  | 4973  | 3925  | 5533  | 3936  | 4749  | 3949  | 8387  | 9535  | 6195  | 6325  | 5137  | 6066  | 5115  | 3790  | 5465  | 3395  | 3345  | 4104  | 4048  | 4005   | Ppfbp1   |      |
| Ppfbp2   | 656   | 476   | 439   | 268   | 268   | 319   | 232   | 713   | 739   | 663   | 851   | 505   | 955   | 484   | 527   | 695   | 297   | 317   | 203   | 258   | 209   | 515   | 1018  | 539   | 390   | 727   | 523   | 553    | Ppfbp2   |      |
| Ppfln1   | 8068  | 7272  | 8735  | 7443  | 6551  | 7258  | 7349  | 5584  | 5056  | 5228  | 4809  | 6483  | 6022  | 6296  | 8319  | 7739  | 7898  | 6963  | 6841  | 7023  | 6822  | 4774  | 4959  | 5565  | 7380  | 6589  | 6412  | 6763   | Ppfln1   |      |
| Ppia     | 42538 | 55900 | 53621 | 40667 | 38508 | 41217 | 43221 | 57074 | 58536 | 46846 | 51865 | 55542 | 61533 | 60909 | 50401 | 51976 | 45700 | 40132 | 43559 | 54690 | 41499 | 44037 | 59393 | 53363 | 52868 | 70092 | 65545 | 68443  | Ppia     |      |
| Ppib     | 19534 | 14017 | 13099 | 11680 | 10468 | 11284 | 11306 | 11913 | 13238 | 11805 | 13174 | 11994 | 12700 | 12094 | 12802 | 13545 | 12698 | 11580 | 11510 | 11906 | 11129 | 11203 | 14433 | 12669 | 11371 | 13722 | 12757 | 13238  | Ppib     |      |
| Ppic     | 3903  | 3289  | 3914  | 2497  | 1908  | 2543  | 1701  | 3483  | 4158  | 3349  | 4466  | 3268  | 4105  | 3390  | 3699  | 4442  | 2849  | 2773  | 1663  | 1954  | 1490  | 3337  | 5069  | 3618  | 2845  | 4164  | 3390  | 3623   | Ppic     |      |
| Ppid     | 10382 | 8046  | 9746  | 8659  | 8207  | 8616  | 10438 | 9912  | 8996  | 8516  | 8762  | 9142  | 8927  | 10401 | 10606 | 9544  | 8423  | 8340  | 8146  | 10053 | 9089  | 8612  | 9147  | 9367  | 8444  | 10228 | 9086  | 10099  | Ppid     |      |
| Ppie     | 2832  | 2929  | 2974  | 2460  | 2072  | 2266  | 2447  | 2363  | 2476  | 2193  | 2200  | 2735  | 2465  | 2736  | 2694  | 2546  | 2706  | 2225  | 2419  | 2704  | 2284  | 1927  | 2385  | 2478  | 2264  | 3263  | 2791  | 3050   | Ppie     |      |
| Ppif     | 2420  | 2748  | 2824  | 2922  | 2384  | 2466  | 2550  | 1546  | 1845  | 1846  | 1778  | 2066  | 1989  | 2076  | 2231  | 2643  | 2701  | 2872  | 2625  | 2219  | 2505  | 1536  | 1650  | 2015  | 1880  | 2374  | 2088  | 1976   | Ppif     |      |
| Ppig     | 13955 | 10555 | 14487 | 13338 | 11935 | 13053 | 12970 | 12737 | 11038 | 11654 | 11475 | 12181 | 12152 | 13238 | 14151 | 12110 | 13381 | 12123 | 12274 | 13100 | 12570 | 11307 | 10861 | 12527 | 11536 | 12942 | 13160 | 13258  | Ppig     |      |
| Ppih     | 1917  | 1738  | 1602  | 1274  | 1106  | 1435  | 1500  | 1964  | 1749  | 1741  | 1691  | 2166  | 1897  | 2533  | 1768  | 1684  | 1482  | 1088  | 1402  | 1770  | 1274  | 1592  | 1841  | 1839  | 1589  | 2334  | 2479  | 2563   | Ppih     |      |
| Ppi1     | 3464  | 4139  | 3989  | 3646  | 2906  | 3400  | 3328  | 2663  | 2912  | 2931  | 2758  | 3367  | 3158  | 3418  | 3364  | 3252  | 3843  | 2979  | 3636  | 3511  | 3434  | 2398  | 2813  | 3365  | 2949  | 4179  | 3548  | 3898   | Ppi1     |      |
| Ppi2     | 8469  | 8937  | 7648  | 8195  | 7886  | 8118  | 8292  | 6988  | 7234  | 6509  | 6520  | 7072  | 6974  | 6961  | 8148  | 8230  | 8343  | 8311  | 8377  | 8635  | 8176  | 6854  | 7067  | 6856  | 7143  | 7149  | 7382  | 7007   | Ppi2     |      |
| Ppi3     | 1175  | 1015  | 1221  | 1015  | 1049  | 1135  | 1117  | 2081  | 1771  | 1692  | 1758  | 1768  | 1833  | 2054  | 1240  | 1103  | 1021  | 963   | 1098  | 1255  | 1126  | 1643  | 1790  | 1920  | 1700  | 2004  | 2091  | 2231   | Ppi3     |      |
| Ppi4     | 5479  | 4677  | 5417  | 4990  | 4844  | 5004  | 5434  | 6145  | 5066  | 5141  | 5042  | 5533  | 5138  | 5783  | 5624  | 5489  | 5015  | 4858  | 4797  | 5641  | 5023  | 5688  | 5119  | 5548  | 5323  | 5738  | 5678  | 5784   | Ppi4     |      |
| Ppi6     | 323   | 318   | 239   | 351   | 326   | 418   | 419   | 98    | 80    | 116   | 102   | 79    | 87    | 98    | 38    | 324   | 347   | 295   | 377   | 336   | 372   | 367   | 104   | 97    | 82    | 114   | 41    | 62     | 72       | Ppi6 |
| Ppip5k1  | 2045  | 2453  | 2026  | 2354  | 2508  | 2409  | 2395  | 2148  | 2179  | 2347  | 2240  | 1902  | 2032  | 1916  | 2048  | 2305  | 2306  | 2586  | 2400  | 2368  | 2645  | 2433  | 2104  | 2054  | 2330  | 1350  | 1990  | 1826   | Ppip5k1  |      |
| Ppip5k2  | 13532 | 10435 | 9248  | 10666 | 12363 | 13532 | 14443 | 14669 | 12543 | 11085 | 11170 | 11056 | 11281 | 12591 |       |       |       |       |       |       |       |       |       |       |       |       |       |        |          |      |

|          |       |       |       |       |       |       |       |       |       |       |       |       |       |       |       |       |       |       |       |       |       |       |       |       |       |       |       |         |          |         |
|----------|-------|-------|-------|-------|-------|-------|-------|-------|-------|-------|-------|-------|-------|-------|-------|-------|-------|-------|-------|-------|-------|-------|-------|-------|-------|-------|-------|---------|----------|---------|
| Ppp1r15b | 7243  | 7418  | 9060  | 9095  | 7309  | 7305  | 7394  | 6346  | 5927  | 6382  | 6590  | 7974  | 7498  | 7576  | 7106  | 7271  | 8473  | 8439  | 7716  | 6325  | 7537  | 7237  | 6064  | 7147  | 7077  | 8050  | 7941  | 8380    | Ppp1r15b |         |
| Ppp1r16a | 3556  | 4982  | 4382  | 4893  | 4363  | 4210  | 3800  | 2325  | 2860  | 2866  | 2749  | 3171  | 2947  | 2868  | 3626  | 3937  | 4971  | 4418  | 4925  | 3812  | 4002  | 3091  | 2913  | 3245  | 3079  | 2962  | 2915  | 2865    | Ppp1r16a |         |
| Ppp1r16b | 1160  | 1453  | 1277  | 1674  | 1980  | 1781  | 1793  | 629   | 806   | 813   | 797   | 545   | 578   | 606   | 1207  | 1247  | 1511  | 1574  | 1964  | 1639  | 1923  | 872   | 786   | 664   | 1093  | 416   | 643   | 541     | Ppp1r16b |         |
| Ppp1r17  | 632   | 681   | 655   | 423   | 660   | 404   | 289   | 778   | 629   | 647   | 662   | 672   | 1438  | 666   | 1106  | 1121  | 844   | 419   | 335   | 483   | 302   | 909   | 445   | 337   | 568   | 464   | 841   | 796     | Ppp1r17  |         |
| Ppp1r18  | 3722  | 4438  | 6004  | 4882  | 5326  | 4839  | 4171  | 4693  | 4825  | 5418  | 5632  | 5938  | 5763  | 5799  | 3758  | 4114  | 5648  | 4587  | 5408  | 4077  | 4013  | 5153  | 4732  | 5973  | 5947  | 6066  | 5600  | 5885    | Ppp1r18  |         |
| Ppp1r1a  | 1705  | 2285  | 2112  | 2430  | 2509  | 2278  | 2223  | 1368  | 1317  | 1431  | 1228  | 1454  | 1484  | 1428  | 1832  | 1965  | 2274  | 2315  | 2588  | 2708  | 2298  | 1332  | 1373  | 1540  | 1552  | 1234  | 1493  | 1387    | Ppp1r1a  |         |
| Ppp1r1b  | 219   | 314   | 288   | 459   | 641   | 543   | 643   | 127   | 223   | 243   | 151   | 75    | 18    | 88    | 219   | 253   | 341   | 625   | 771   | 520   | 753   | 62    | 98    | 198   | 314   | 74    | 51    | 62      | Ppp1r1b  |         |
| Ppp1r1c  | 293   | 291   | 91    | 47    | 736   | 54    | 28    | 855   | 765   | 515   | 778   | 54    | 976   | 55    | 575   | 636   | 169   | 341   | 52    | 101   | 49    | 1238  | 499   | 47    | 541   | 4     | 56    | 72      | Ppp1r1c  |         |
| Ppp1r2   | 8466  | 6604  | 8770  | 8321  | 9219  | 8168  | 8763  | 8145  | 7299  | 7297  | 8016  | 7607  | 8549  | 8364  | 9306  | 8601  | 8218  | 9027  | 7822  | 7483  | 8319  | 9608  | 7071  | 6966  | 8458  | 8609  | 7740  | 8546    | Ppp1r2   |         |
| Ppp1r21  | 3748  | 4213  | 3755  | 4636  | 5258  | 4953  | 5282  | 3526  | 3729  | 3993  | 3403  | 3633  | 3359  | 3613  | 4221  | 3907  | 4193  | 4796  | 5187  | 4741  | 5507  | 3897  | 3679  | 3630  | 4171  | 3332  | 3398  | 3532    | Ppp1r21  |         |
| Ppp1r26  | 1531  | 1824  | 1953  | 2028  | 2499  | 2053  | 1944  | 2256  | 2616  | 3136  | 2702  | 2646  | 2503  | 2578  | 1561  | 1615  | 2311  | 2187  | 2411  | 1889  | 1990  | 2762  | 2292  | 2808  | 2916  | 2407  | 2467  | 2429    | Ppp1r26  |         |
| Ppp1r27  | 0     | 0     | 0     | 0     | 0     | 0     | 0     | 0     | 0     | 0     | 6     | 0     | 0     | 0     | 0     | 1     | 0     | 0     | 2     | 0     | 2     | 0     | 0     | 0     | 0     | 0     | 0     | 0       | 0        | Ppp1r27 |
| Ppp1r32  | 76    | 102   | 83    | 89    | 111   | 117   | 80    | 66    | 84    | 83    | 61    | 111   | 118   | 73    | 98    | 98    | 139   | 90    | 126   | 96    | 105   | 62    | 87    | 68    | 86    | 84    | 73    | 61      | Ppp1r32  |         |
| Ppp1r35  | 1497  | 1925  | 1982  | 1951  | 1546  | 1490  | 1386  | 915   | 889   | 1054  | 860   | 1123  | 972   | 1031  | 1452  | 1313  | 2031  | 1745  | 1852  | 1642  | 1664  | 749   | 857   | 1129  | 958   | 1332  | 1164  | 1098    | Ppp1r35  |         |
| Ppp1r36  | 70    | 46    | 27    | 21    | 53    | 66    | 32    | 64    | 86    | 95    | 78    | 49    | 59    | 19    | 57    | 96    | 52    | 30    | 37    | 31    | 25    | 69    | 112   | 42    | 33    | 46    | 29    | 39      | Ppp1r36  |         |
| Ppp1r37  | 4602  | 6427  | 6745  | 7628  | 7146  | 6046  | 5768  | 3975  | 4634  | 5330  | 5128  | 4999  | 4461  | 4408  | 4733  | 5308  | 7109  | 7702  | 7602  | 5549  | 6424  | 5075  | 4859  | 5410  | 5410  | 5398  | 4284  | 4349    | Ppp1r37  |         |
| Ppp1r3a  | 1     | 8     | 0     | 6     | 2     | 1     | 10    | 9     | 10    | 3     | 63    | 1     | 12    | 1     | 0     | 5     | 8     | 3     | 0     | 1     | 3     | 2     | 55    | 1     | 8     | 4     | 2     | 4       | Ppp1r3a  |         |
| Ppp1r3b  | 1599  | 1396  | 1395  | 1260  | 959   | 1144  | 672   | 1329  | 2136  | 1856  | 1978  | 989   | 1487  | 847   | 1236  | 1858  | 1270  | 1406  | 676   | 670   | 754   | 1773  | 2034  | 1611  | 1138  | 1458  | 1053  | 808     | Ppp1r3b  |         |
| Ppp1r3c  | 750   | 783   | 619   | 800   | 910   | 814   | 791   | 697   | 801   | 724   | 807   | 295   | 517   | 286   | 1044  | 815   | 687   | 884   | 715   | 821   | 752   | 695   | 1048  | 486   | 476   | 389   | 343   | 256     | Ppp1r3c  |         |
| Ppp1r3d  | 451   | 517   | 412   | 531   | 630   | 450   | 476   | 241   | 232   | 231   | 338   | 102   | 179   | 121   | 491   | 483   | 446   | 551   | 458   | 480   | 550   | 247   | 298   | 178   | 182   | 164   | 84    | 94      | Ppp1r3d  |         |
| Ppp1r3e  | 216   | 217   | 249   | 353   | 422   | 391   | 367   | 325   | 368   | 408   | 413   | 357   | 346   | 361   | 239   | 220   | 308   | 380   | 363   | 332   | 377   | 488   | 361   | 443   | 466   | 460   | 264   | 352     | Ppp1r3e  |         |
| Ppp1r3f  | 129   | 157   | 151   | 160   | 236   | 202   | 127   | 208   | 199   | 263   | 230   | 236   | 197   | 182   | 128   | 136   | 156   | 174   | 225   | 153   | 161   | 236   | 167   | 238   | 242   | 167   | 280   | 140     | Ppp1r3f  |         |
| Ppp1r3g  | 74    | 86    | 95    | 64    | 76    | 70    | 70    | 45    | 47    | 40    | 59    | 52    | 39    | 59    | 98    | 83    | 108   | 63    | 68    | 53    | 71    | 13    | 32    | 45    | 52    | 63    | 34    | 40      | Ppp1r3g  |         |
| Ppp1r42  | 50    | 61    | 122   | 63    | 55    | 48    | 59    | 22    | 21    | 41    | 37    | 30    | 46    | 35    | 45    | 78    | 36    | 66    | 51    | 52    | 62    | 35    | 54    | 29    | 34    | 26    | 19    | 36      | Ppp1r42  |         |
| Ppp1r7   | 8712  | 8021  | 7014  | 7882  | 7313  | 7886  | 8638  | 5823  | 5719  | 6094  | 5717  | 7287  | 6525  | 7687  | 8359  | 7215  | 7496  | 7526  | 7157  | 7944  | 8019  | 5451  | 5407  | 5811  | 6339  | 6863  | 7677  | 7350    | Ppp1r7   |         |
| Ppp1r8   | 5170  | 5470  | 6070  | 5334  | 4942  | 5128  | 5062  | 5930  | 5526  | 5405  | 5107  | 6579  | 5629  | 6403  | 5239  | 4831  | 5859  | 4945  | 5525  | 5854  | 4897  | 5053  | 5273  | 6034  | 5769  | 7706  | 6919  | 7059    | Ppp1r8   |         |
| Ppp1r9a  | 5869  | 5142  | 3504  | 5599  | 7245  | 7775  | 7190  | 12132 | 11963 | 11307 | 12801 | 10936 | 10314 | 11509 | 6080  | 5768  | 4494  | 5442  | 5843  | 6721  | 7504  | 11358 | 10957 | 8644  | 11781 | 6153  | 11302 | 8977    | Ppp1r9a  |         |
| Ppp1r9b  | 11227 | 14382 | 14942 | 18077 | 17232 | 15041 | 14208 | 10331 | 11037 | 13387 | 12642 | 12748 | 10473 | 11636 | 11054 | 11409 | 16560 | 17141 | 18654 | 13730 | 16696 | 12978 | 10958 | 14096 | 14925 | 13623 | 11375 | 12252   | Ppp1r9b  |         |
| Ppp2ca   | 25007 | 22786 | 22935 | 24496 | 25406 | 24918 | 27430 | 33208 | 28035 | 28297 | 25623 | 29393 | 27677 | 30251 | 26710 | 20350 | 23901 | 23942 | 26703 | 25948 | 28236 | 31001 | 28991 | 28077 | 29680 | 30778 | 30781 | 31623   | Ppp2ca   |         |
| Ppp2cb   | 5991  | 5763  | 6236  | 6072  | 5993  | 5519  | 6187  | 6566  | 6311  | 6101  | 5799  | 7076  | 6451  | 6921  | 5917  | 5539  | 6163  | 5721  | 6279  | 5972  | 6243  | 6081  | 6312  | 6457  | 6492  | 7208  | 6880  | 7173    | Ppp2cb   |         |
| Ppp2r1a  | 20251 | 24109 | 21385 | 23361 | 26189 | 24983 | 24061 | 23294 | 28051 | 25558 | 23600 | 20413 | 25753 | 26728 | 20343 | 19612 | 23059 | 22653 | 26974 | 22346 | 25070 | 27268 | 24227 | 25842 | 27209 | 26260 | 27843 | Ppp2r1a |          |         |
| Ppp2r1b  | 10219 | 10040 | 10474 | 9068  | 8235  | 8479  | 9485  | 6023  | 5772  | 5331  | 5451  | 6928  | 6455  | 6929  | 9777  | 9047  | 9603  | 8920  | 9082  | 9310  | 8704  | 4964  | 5348  | 6128  | 6036  | 7691  | 7325  | 7233    | Ppp2r1b  |         |
| Ppp2r2a  | 9127  | 7861  | 10317 | 10388 | 9684  | 8868  | 9666  | 7891  | 7378  | 7951  | 7674  | 9009  | 8181  | 8850  | 8987  | 8330  | 10210 | 10247 | 10006 | 7694  | 10337 | 8980  | 7234  | 8528  | 8393  | 10057 | 8566  | 9280    | Ppp2r2a  |         |
| Ppp2r2b  | 1986  | 2263  | 1670  | 3537  | 5475  | 4681  | 5662  | 4907  | 5607  | 5308  | 4351  | 3432  | 3006  | 3836  | 2643  | 1784  | 2418  | 4296  | 5001  | 5462  | 5517  | 4921  | 4458  | 4863  | 6411  | 3594  | 2489  | 2794    | Ppp2r2b  |         |
| Ppp2r2c  | 509   | 675   | 448   | 1286  | 3046  | 1888  | 2207  | 1993  | 2431  | 2502  | 2530  | 1189  | 951   | 1228  | 761   | 598   | 910   | 1818  | 2097  | 1865  | 2406  | 3008  | 2374  | 1883  | 2925  | 865   | 807   | 800     | Ppp2r2c  |         |
| Ppp2r2d  | 5132  | 4641  | 5018  | 5395  | 5434  | 5455  | 5795  | 5567  | 4940  | 5399  | 5063  | 5615  | 5240  | 5933  | 5160  | 4160  | 5109  | 5103  | 5568  | 4983  | 6047  | 5840  | 5000  | 5147  | 5686  | 5879  | 5616  | 6008    | Ppp2r2d  |         |
| Ppp2r3a  | 6584  | 6082  | 4773  | 6492  | 8715  | 8581  | 8311  | 9623  | 8370  | 8067  | 7575  | 6887  | 7377  | 7078  | 7764  | 5860  | 5964  | 7030  | 7644  | 8899  | 8616  | 8727  | 8348  | 6612  | 7879  | 4620  | 6809  | 6610    | Ppp2r3a  |         |
| Ppp2r3c  | 2309  | 1872  | 2161  | 2089  | 2747  | 2275  | 2731  | 4542  | 3551  | 3571  | 3303  | 3960  | 3881  | 4630  | 2641  | 2008  | 2224  | 2194  | 2420  | 2749  | 2702  | 3648  | 3398  | 3754  | 4049  | 4092  | 4267  | 4138    | Ppp2r3c  |         |
| Ppp2r3d  | 29    | 74    | 27    | 28    | 53    | 17    | 45    | 61    | 54    | 43    | 81    | 90    | 67    | 62    | 128   | 36    | 26    | 34    | 24    | 29    | 107   | 53    | 51    | 87    | 69    | 85    | 63    | Ppp2r3d |          |         |
| Ppp2r5a  | 4410  | 3973  | 4305  | 3955  | 3398  | 3549  | 3727  | 2304  | 2456  | 2219  | 2541  | 2393  | 2369  | 2432  | 3990  | 3992  | 3783  | 3919  | 3626  | 3685  | 3514  | 1967  | 2650  | 2395  | 2083  | 2823  | 2366  | 2379    | Ppp2r5a  |         |
| Ppp2r5b  | 0     | 0     | 0     | 0     | 0     | 0     | 0     | 0     | 0     | 0     | 0     | 0     | 0     | 0     | 0     | 1     | 0     | 0     | 0     | 0     | 1     | 0     | 0     | 0     | 0     | 0     | 0     | 0       | 0        | Ppp2r5b |
| Ppp2r5c  | 10671 | 10718 | 10510 | 10604 | 10324 | 9665  | 10690 | 10119 | 9667  | 9584  | 9276  | 9919  | 9552  | 9973  | 10933 | 10763 | 10798 | 10378 | 10162 | 10561 | 10409 | 9605  | 9785  | 9024  | 9338  | 10071 | 9879  | 10379   | Ppp2r5c  |         |
| Ppp2r5d  | 13998 | 16169 | 14029 | 13945 | 12024 | 12410 | 12201 | 6757  | 7420  | 7525  | 6823  | 8815  | 7917  | 7776  | 13226 | 13544 | 14336 | 13366 | 13986 | 11824 | 13083 | 6839  | 7304  | 7732  | 7154  | 9641  | 8367  | 8410    | Ppp2r5d  |         |
| Ppp2r5e  | 9566  | 7679  | 9342  | 9583  | 9793  | 9758  | 10683 | 9304  | 8201  | 9006  | 8554  | 10788 | 9187  | 10653 | 9430  | 8368  | 9427  | 9671  | 10256 | 8570  | 10523 | 10273 | 7717  | 9559  | 10178 | 9484  | 9718  | 10690   | Ppp2r5e  |         |
| Ppp3ca   | 10656 | 8317  | 10557 | 13211 | 14722 | 14052 | 15940 | 11803 | 10682 | 11878 | 11613 | 10101 | 9840  | 10952 | 10984 | 9037  | 11846 | 14047 | 14611 | 12283 | 16099 | 13926 | 10980 | 11684 | 13067 | 10044 | 9359  | 10611   | Ppp3ca   |         |
| Ppp3cb   | 11648 | 8695  | 10627 | 12190 | 15101 | 14265 | 16542 | 17315 | 15081 | 15672 | 15674 | 15946 | 14610 | 16973 | 12018 | 9780  | 11363 | 13091 | 14214 | 13143 | 16125 | 18842 | 15611 | 15806 | 17917 | 15264 | 15682 | 16667   | Ppp3cb   |         |
| Ppp3cc   | 490   | 403   | 438   | 458   | 491   | 531   | 443   | 663   | 710   | 616   | 553   | 533   | 497   | 543   | 521   | 498   | 480   | 445   | 352   | 456   | 398   | 710   | 700   | 4     |       |       |       |         |          |         |





|         |       |       |       |       |       |       |       |       |       |       |       |       |       |       |       |       |       |       |       |       |       |       |       |       |       |       |       |       |         |        |
|---------|-------|-------|-------|-------|-------|-------|-------|-------|-------|-------|-------|-------|-------|-------|-------|-------|-------|-------|-------|-------|-------|-------|-------|-------|-------|-------|-------|-------|---------|--------|
| Prkrip1 | 2022  | 2374  | 2378  | 2465  | 2203  | 2217  | 2237  | 1901  | 1729  | 1981  | 1585  | 1993  | 1850  | 2009  | 2188  | 2099  | 2559  | 2402  | 2261  | 2376  | 2172  | 1744  | 1685  | 2058  | 1937  | 1834  | 2144  | 2148  | Prkrip1 |        |
| Prkx    | 4516  | 3906  | 4941  | 6050  | 6019  | 5816  | 5830  | 3600  | 3342  | 3957  | 3674  | 3656  | 3623  | 3460  | 4615  | 4565  | 5561  | 6252  | 5834  | 4487  | 6018  | 4692  | 3078  | 3733  | 4417  | 3425  | 3185  | 3456  | Prkx    |        |
| Prl     | 0     | 0     | 0     | 0     | 0     | 0     | 0     | 0     | 0     | 0     | 0     | 0     | 0     | 0     | 0     | 0     | 0     | 0     | 0     | 0     | 0     | 0     | 1     | 0     | 0     | 0     | 0     | 0     | 0       | Prl    |
| Prl2a1  | 0     | 0     | 0     | 0     | 0     | 0     | 0     | 0     | 9     | 0     | 0     | 0     | 0     | 0     | 0     | 0     | 0     | 0     | 0     | 0     | 0     | 0     | 0     | 0     | 0     | 0     | 0     | 0     | 0       | Prl2a1 |
| Prl2b1  | 0     | 0     | 0     | 0     | 0     | 0     | 0     | 0     | 13    | 0     | 0     | 0     | 0     | 0     | 0     | 0     | 0     | 0     | 0     | 0     | 0     | 0     | 6     | 0     | 0     | 0     | 0     | 0     | 0       | Prl2b1 |
| Prl2c2  | 0     | 0     | 0     | 0     | 0     | 0     | 2     | 0     | 3     | 0     | 0     | 0     | 0     | 0     | 0     | 0     | 0     | 0     | 1     | 0     | 0     | 0     | 0     | 0     | 0     | 0     | 0     | 0     | 0       | Prl2c2 |
| Prl2c3  | 0     | 0     | 0     | 0     | 0     | 0     | 0     | 0     | 9     | 0     | 0     | 0     | 0     | 0     | 0     | 0     | 0     | 0     | 0     | 0     | 0     | 0     | 5     | 0     | 0     | 0     | 0     | 0     | 0       | Prl2c3 |
| Prl2c5  | 0     | 0     | 0     | 0     | 0     | 0     | 0     | 0     | 5     | 0     | 0     | 0     | 0     | 0     | 0     | 0     | 0     | 0     | 0     | 0     | 0     | 0     | 0     | 0     | 0     | 0     | 0     | 0     | 0       | Prl2c5 |
| Prl3a1  | 0     | 0     | 0     | 0     | 0     | 0     | 0     | 0     | 2     | 0     | 0     | 0     | 0     | 0     | 0     | 0     | 0     | 0     | 0     | 0     | 0     | 0     | 1     | 0     | 0     | 0     | 0     | 0     | 0       | Prl3a1 |
| Prl3b1  | 0     | 1     | 0     | 0     | 0     | 0     | 0     | 0     | 1     | 35    | 0     | 0     | 4     | 3     | 0     | 0     | 2     | 0     | 0     | 0     | 0     | 0     | 12    | 0     | 0     | 1     | 3     | 2     | 1       | Prl3b1 |
| Prl3c1  | 0     | 0     | 0     | 0     | 0     | 0     | 0     | 0     | 1     | 0     | 0     | 0     | 0     | 0     | 0     | 0     | 0     | 0     | 0     | 0     | 0     | 0     | 0     | 0     | 0     | 0     | 0     | 0     | 0       | Prl3c1 |
| Prl3d1  | 0     | 0     | 0     | 0     | 0     | 0     | 0     | 0     | 0     | 0     | 2     | 0     | 0     | 2     | 1     | 1     | 0     | 0     | 0     | 0     | 0     | 0     | 0     | 0     | 0     | 0     | 0     | 0     | 0       | Prl3d1 |
| Prl3d2  | 0     | 0     | 0     | 0     | 1     | 0     | 0     | 0     | 0     | 2     | 0     | 0     | 0     | 1     | 0     | 3     | 0     | 0     | 0     | 0     | 0     | 0     | 0     | 0     | 0     | 0     | 1     | 0     | 0       | Prl3d2 |
| Prl3d3  | 0     | 0     | 0     | 0     | 0     | 0     | 0     | 0     | 0     | 0     | 0     | 0     | 1     | 0     | 0     | 0     | 0     | 0     | 0     | 0     | 0     | 0     | 0     | 0     | 0     | 0     | 0     | 0     | 0       | Prl3d3 |
| Prl5a1  | 0     | 0     | 0     | 0     | 3     | 0     | 0     | 0     | 0     | 0     | 0     | 0     | 0     | 0     | 0     | 0     | 0     | 0     | 0     | 0     | 0     | 0     | 0     | 0     | 0     | 0     | 0     | 0     | 0       | Prl5a1 |
| Prl6a1  | 1     | 0     | 0     | 0     | 2     | 0     | 0     | 0     | 1     | 0     | 0     | 0     | 0     | 0     | 0     | 0     | 0     | 0     | 0     | 0     | 0     | 0     | 0     | 0     | 0     | 0     | 0     | 0     | 0       | Prl6a1 |
| Prl7a1  | 0     | 0     | 0     | 0     | 0     | 0     | 0     | 0     | 0     | 0     | 0     | 0     | 0     | 0     | 0     | 0     | 0     | 0     | 0     | 0     | 0     | 0     | 2     | 0     | 0     | 0     | 0     | 0     | 0       | Prl7a1 |
| Prl7a2  | 0     | 0     | 0     | 0     | 0     | 0     | 0     | 0     | 13    | 0     | 0     | 0     | 0     | 0     | 0     | 0     | 0     | 0     | 1     | 0     | 0     | 0     | 5     | 0     | 0     | 0     | 0     | 0     | 0       | Prl7a2 |
| Prl7d1  | 0     | 0     | 0     | 0     | 0     | 0     | 0     | 0     | 2     | 0     | 0     | 0     | 0     | 0     | 0     | 0     | 0     | 0     | 0     | 0     | 0     | 0     | 1     | 0     | 0     | 0     | 0     | 0     | 0       | Prl7d1 |
| Prl8a1  | 0     | 0     | 0     | 0     | 0     | 0     | 0     | 0     | 1     | 0     | 0     | 0     | 0     | 0     | 0     | 0     | 0     | 0     | 0     | 0     | 0     | 0     | 0     | 0     | 0     | 0     | 0     | 0     | 0       | Prl8a1 |
| Prl8a2  | 0     | 0     | 0     | 2     | 0     | 0     | 12    | 2     | 8     | 2     | 0     | 0     | 0     | 0     | 0     | 0     | 0     | 2     | 0     | 2     | 0     | 0     | 3     | 0     | 0     | 0     | 0     | 0     | 0       | Prl8a2 |
| Prl8a6  | 0     | 0     | 0     | 0     | 0     | 0     | 0     | 0     | 1     | 0     | 0     | 0     | 0     | 0     | 0     | 0     | 0     | 0     | 0     | 0     | 0     | 0     | 0     | 0     | 0     | 0     | 0     | 0     | 0       | Prl8a6 |
| Prl8a8  | 0     | 0     | 0     | 0     | 0     | 0     | 0     | 1     | 6     | 0     | 0     | 1     | 0     | 0     | 0     | 0     | 0     | 0     | 0     | 0     | 0     | 0     | 6     | 0     | 0     | 0     | 0     | 0     | 0       | Prl8a8 |
| Prl8a9  | 0     | 0     | 0     | 0     | 0     | 0     | 0     | 0     | 30    | 0     | 0     | 0     | 0     | 0     | 0     | 0     | 0     | 0     | 0     | 0     | 0     | 0     | 6     | 0     | 0     | 0     | 0     | 0     | 0       | Prl8a9 |
| Prlh    | 0     | 0     | 0     | 0     | 0     | 0     | 0     | 0     | 0     | 0     | 0     | 0     | 0     | 0     | 2     | 0     | 2     | 0     | 0     | 0     | 0     | 0     | 0     | 0     | 0     | 0     | 0     | 0     | 0       | Prlh   |
| Prlhr   | 29    | 34    | 30    | 51    | 56    | 38    | 42    | 4     | 8     | 9     | 15    | 4     | 3     | 5     | 15    | 29    | 49    | 43    | 57    | 37    | 63    | 7     | 3     | 9     | 1     | 1     | 5     | 4     | Prlhr   |        |
| Prlr    | 51    | 30    | 20    | 35    | 45    | 35    | 47    | 107   | 117   | 95    | 80    | 29    | 35    | 47    | 50    | 44    | 28    | 14    | 18    | 32    | 38    | 77    | 115   | 65    | 53    | 34    | 19    | 34    | Prlr    |        |
| Prm1    | 0     | 0     | 0     | 0     | 0     | 0     | 0     | 0     | 0     | 0     | 0     | 0     | 0     | 0     | 1     | 0     | 0     | 0     | 0     | 0     | 0     | 0     | 1     | 0     | 0     | 0     | 0     | 0     | 0       | Prm1   |
| Prm11   | 16296 | 19935 | 18604 | 17494 | 16154 | 16750 | 15811 | 19848 | 20725 | 20028 | 18108 | 23736 | 21177 | 21923 | 16150 | 16049 | 17980 | 16005 | 19530 | 19103 | 17051 | 17396 | 19527 | 22289 | 21710 | 27901 | 25679 | 24534 | Prm11   |        |
| Prm12   | 3224  | 4582  | 3994  | 5334  | 5821  | 5048  | 4930  | 5970  | 5726  | 7026  | 5804  | 5570  | 4859  | 5367  | 3690  | 3642  | 4949  | 5096  | 5861  | 5425  | 5168  | 6487  | 5768  | 6327  | 7071  | 5066  | 5108  | 5015  | Prm12   |        |
| Prm13   | 1378  | 1455  | 1453  | 1245  | 1176  | 1184  | 1309  | 2298  | 2042  | 1934  | 1956  | 2217  | 2175  | 2226  | 1382  | 1259  | 1350  | 1121  | 1112  | 1315  | 1151  | 1910  | 2048  | 1995  | 1918  | 2075  | 2366  | 2392  | Prm13   |        |
| Prm15   | 10813 | 12442 | 10408 | 10748 | 9186  | 9951  | 10086 | 8304  | 8286  | 7708  | 7037  | 8837  | 8410  | 9439  | 10582 | 10043 | 10337 | 9874  | 11321 | 10221 | 11112 | 7442  | 7972  | 8409  | 8259  | 10163 | 9556  | 10300 | Prm15   |        |
| Prm16   | 1879  | 1551  | 1754  | 1810  | 1701  | 1711  | 1758  | 2210  | 1964  | 1968  | 1930  | 2116  | 2165  | 2054  | 1825  | 1569  | 1622  | 1661  | 1763  | 1821  | 1589  | 2082  | 1973  | 1862  | 2062  | 2172  | 1969  | 2013  | Prm16   |        |
| Prm17   | 3524  | 4180  | 3521  | 3751  | 3451  | 3542  | 3226  | 4020  | 3896  | 3672  | 3621  | 4137  | 4325  | 4007  | 3571  | 3462  | 3593  | 3311  | 3833  | 3684  | 3461  | 3517  | 4105  | 3854  | 4129  | 4627  | 4485  | 4441  | Prm17   |        |
| Prm18   | 837   | 1223  | 1451  | 1552  | 2109  | 1614  | 1398  | 1939  | 1634  | 2355  | 1798  | 2372  | 2938  | 1986  | 1273  | 1124  | 1803  | 1391  | 1944  | 1723  | 1643  | 2585  | 1808  | 1999  | 2493  | 1812  | 2430  | 2262  | Prm18   |        |
| Prm19   | 3075  | 2986  | 2570  | 2786  | 2635  | 2795  | 2777  | 2881  | 2413  | 2047  | 2396  | 2073  | 2082  | 2243  | 3376  | 3205  | 2576  | 2674  | 2501  | 3009  | 2692  | 2309  | 2327  | 2097  | 2209  | 2247  | 2205  | 2148  | Prm19   |        |
| Prn     | 0     | 5     | 0     | 0     | 0     | 1     | 7     | 0     | 1     | 3     | 1     | 0     | 2     | 0     | 1     | 0     | 0     | 1     | 0     | 0     | 0     | 1     | 0     | 0     | 0     | 0     | 0     | 0     | 6       | Prn    |
| Prnd    | 0     | 1     | 0     | 2     | 1     | 5     | 3     | 0     | 3     | 0     | 0     | 0     | 0     | 0     | 0     | 0     | 0     | 0     | 0     | 0     | 1     | 2     | 1     | 0     | 5     | 0     | 0     | 0     | Prnd    |        |
| Prnp    | 5807  | 5566  | 4778  | 6227  | 6332  | 6039  | 6972  | 4515  | 4226  | 4307  | 3977  | 3707  | 3154  | 3693  | 6348  | 5247  | 5679  | 6269  | 6347  | 6595  | 6892  | 4963  | 4412  | 4037  | 4471  | 3770  | 3581  | 3402  | Prnp    |        |
| Probc1  | 1013  | 1315  | 1554  | 1609  | 1374  | 1209  | 1178  | 552   | 547   | 662   | 928   | 677   | 609   | 633   | 1096  | 1206  | 1696  | 1502  | 1404  | 1074  | 1214  | 807   | 641   | 646   | 657   | 649   | 646   | 602   | Probc1  |        |
| Proca   | 1     | 6     | 5     | 0     | 2     | 4     | 0     | 1     | 7     | 12    | 8     | 0     | 6     | 3     | 1     | 3     | 5     | 4     | 0     | 0     | 0     | 3     | 5     | 2     | 5     | 5     | 7     | 7     | Proca   |        |
| Proca1  | 113   | 131   | 129   | 123   | 101   | 108   | 68    | 73    | 91    | 138   | 124   | 96    | 91    | 68    | 90    | 146   | 127   | 108   | 79    | 90    | 72    | 107   | 145   | 83    | 74    | 83    | 86    | 87    | Proca1  |        |
| Prochr  | 85    | 92    | 136   | 95    | 108   | 102   | 72    | 104   | 166   | 171   | 209   | 108   | 180   | 117   | 105   | 121   | 110   | 128   | 83    | 103   | 74    | 162   | 239   | 130   | 151   | 154   | 151   | 114   | Prochr  |        |
| Prodh2  | 0     | 2     | 0     | 0     | 7     | 2     | 2     | 0     | 5     | 0     | 0     | 0     | 0     | 1     | 5     | 2     | 0     | 1     | 1     | 1     | 1     | 0     | 0     | 0     | 0     | 0     | 0     | 0     | 0       | Prodh2 |
| Prok1   | 102   | 104   | 115   | 175   | 150   | 123   | 137   | 48    | 46    | 54    | 47    | 71    | 67    | 71    | 94    | 93    | 95    | 141   | 118   | 84    | 154   | 63    | 28    | 37    | 84    | 31    | 48    | 57    | Prok1   |        |
| Prok2   | 8     | 15    | 11    | 5     | 14    | 13    | 15    | 10    | 13    | 17    | 15    | 16    | 9     | 18    | 7     | 5     | 25    | 20    | 21    | 19    | 16    | 20    | 12    | 20    | 26    | 20    | 7     | 20    | Prok2   |        |
| Prokr1  | 1219  | 1400  | 1091  | 1059  | 1024  | 1088  | 1139  | 572   | 561   | 500   | 870   | 686   | 687   | 824   | 1294  | 1012  | 1161  | 1088  | 1203  | 1298  | 1143  | 383   | 733   | 537   | 615   | 650   | 702   | 748   | Prokr1  |        |
| Prokr2  | 601   | 492   | 454   | 549   | 744   | 756   | 834   | 545   | 425   | 623   | 621   | 404   | 254   | 427   | 600   | 472   | 516   | 647   | 726   | 736   | 849   | 707   | 497   | 554   | 772   | 625   | 443   | 452   | Prokr2  |        |
| Prom1   | 7451  | 7106  | 7482  | 4768  | 4608  | 6102  | 5122  | 8254  | 6411  | 6207  | 5308  | 8987  | 9082  | 8248  | 8461  | 7006  | 5825  | 4799  | 5375  | 6836  | 5284  | 5915  | 5949  | 6409  | 6114  | 9035  | 10191 | 9545  | Prom1   |        |
| Prom2   | 151   | 84    | 58    | 21    | 17    | 61    | 0     | 149   | 220   | 182   | 141   | 101   | 134   | 85    | 95    | 117   | 13    | 68    | 9     | 2     | 0     | 53    | 251   | 141   | 15    | 89    | 71    | 103   | Prom2   |        |
| Prop1   | 5     | 3     | 0     | 0     | 13    | 0     | 0     | 0     | 23    | 0     | 17    | 0     | 0     | 0     | 7     | 1     | 0     | 3     | 0     | 0     | 0     | 48    | 16    | 0     | 0     | 0     | 0     | 0     | Prop1   |        |
| Propr   | 859   | 735   | 818   | 605   | 711   | 628   | 772   | 1180  | 1126  | 984   | 1019  | 1187  | 1187  | 1260  | 807   | 697   | 630   | 632   | 650   | 753   | 702   | 1096  | 1164  | 1204  | 1010  | 1300  | 1320  | 1273  | Propr   |        |
| Prosr1  | 355   | 258   | 403   | 261   | 286   | 231   | 304   | 438   | 441   | 444   | 503   | 471   | 500   | 561   | 390   | 291   | 328   | 251   | 207   | 235   | 229   | 366   | 531   | 469   | 351   | 591   | 526   | 590   | Prosr1  |        |
| Prosr1  | 1631  | 1154  | 1512  | 901   | 1012  | 1226  | 816   | 1768  | 1845  | 1382  | 1964  | 1527  | 1734  | 1518  | 1437  | 1659  | 1163  | 1055  | 819   | 975   | 771   | 1420  | 2128  | 1371  | 1180  | 1624  | 1629  | 1772  | Prosr1  |        |
| Proser1 | 4364  | 4698  | 4944  | 5920  | 5231  | 5136  | 5321  | 3440  | 3845  | 4479  | 4143  | 5558  | 4509  | 4965  | 4072  | 4815  | 5917  | 5993  | 5465  | 4099  | 5402  | 4756  | 340   |       |       |       |       |       |         |        |

|         |       |       |       |       |       |       |       |       |       |       |       |       |       |       |       |       |       |       |       |       |       |       |       |       |       |       |       |       |         |        |
|---------|-------|-------|-------|-------|-------|-------|-------|-------|-------|-------|-------|-------|-------|-------|-------|-------|-------|-------|-------|-------|-------|-------|-------|-------|-------|-------|-------|-------|---------|--------|
| Prpsap2 | 4803  | 4807  | 4767  | 4540  | 4383  | 4490  | 5379  | 4323  | 3932  | 3713  | 3347  | 4594  | 3840  | 4772  | 5230  | 4332  | 5129  | 4138  | 4842  | 5116  | 4980  | 3725  | 3981  | 4183  | 3870  | 4643  | 4516  | 4682  | Prpsap2 |        |
| Prr11   | 3898  | 3527  | 4776  | 3553  | 2750  | 2963  | 3389  | 2873  | 2693  | 2853  | 2724  | 4116  | 3549  | 4268  | 3508  | 3348  | 4259  | 3287  | 3403  | 2673  | 3283  | 2607  | 2480  | 3584  | 3085  | 4736  | 3904  | 4171  | Prr11   |        |
| Prr12   | 4056  | 5472  | 7417  | 7628  | 7918  | 6016  | 5421  | 5561  | 7104  | 9403  | 8539  | 10012 | 8005  | 8754  | 3758  | 4335  | 7990  | 7356  | 8552  | 4526  | 6540  | 9870  | 6245  | 10739 | 10190 | 11333 | 7537  | 7971  | Prr12   |        |
| Prr13   | 1566  | 1897  | 1751  | 1757  | 1808  | 1449  | 1725  | 1834  | 1906  | 1779  | 1643  | 1887  | 2304  | 2229  | 1791  | 1780  | 1920  | 1834  | 1758  | 1774  | 1676  | 1878  | 1862  | 2072  | 2079  | 2040  | 1900  | 2243  | Prr13   |        |
| Prr14   | 3393  | 4063  | 4279  | 3976  | 3677  | 3482  | 3672  | 3385  | 3371  | 4015  | 3241  | 4341  | 3677  | 3992  | 3227  | 3249  | 4235  | 3744  | 4212  | 3462  | 3539  | 3649  | 3016  | 4194  | 3950  | 4312  | 4004  | 4003  | Prr14   |        |
| Prr14L  | 5861  | 5472  | 3413  | 5082  | 5323  | 5673  | 5523  | 5351  | 4646  | 4648  | 4751  | 4743  | 4755  | 4670  | 5677  | 5494  | 4036  | 5116  | 4580  | 5458  | 5661  | 4654  | 4449  | 3824  | 4956  | 2868  | 4864  | 4402  | Prr14L  |        |
| Prr15   | 689   | 639   | 570   | 825   | 578   | 570   | 856   | 253   | 228   | 361   | 214   | 338   | 381   | 468   | 542   | 433   | 657   | 604   | 717   | 723   | 705   | 124   | 245   | 446   | 287   | 673   | 318   | 602   | Prr15   |        |
| Prr15L  | 29    | 6     | 7     | 16    | 8     | 1     | 0     | 37    | 33    | 38    | 20    | 5     | 9     | 3     | 16    | 19    | 0     | 3     | 0     | 0     | 0     | 12    | 39    | 41    | 0     | 30    | 3     | 8     | Prr15L  |        |
| Prr16   | 269   | 131   | 164   | 146   | 148   | 150   | 105   | 385   | 476   | 338   | 484   | 149   | 265   | 178   | 182   | 207   | 139   | 200   | 89    | 135   | 135   | 252   | 434   | 306   | 199   | 186   | 136   | 179   | Prr16   |        |
| Prr18   | 90    | 134   | 149   | 164   | 435   | 252   | 278   | 772   | 855   | 1018  | 731   | 679   | 514   | 698   | 119   | 97    | 192   | 205   | 336   | 238   | 323   | 1125  | 808   | 873   | 1107  | 504   | 483   | 555   | Prr18   |        |
| Prr19   | 55    | 83    | 82    | 78    | 66    | 78    | 35    | 42    | 52    | 52    | 50    | 53    | 44    | 44    | 50    | 65    | 80    | 89    | 79    | 71    | 65    | 40    | 40    | 52    | 51    | 47    | 62    | 39    | Prr19   |        |
| Prr22   | 54    | 63    | 85    | 50    | 60    | 60    | 51    | 62    | 59    | 79    | 60    | 64    | 79    | 96    | 24    | 53    | 53    | 63    | 83    | 62    | 49    | 58    | 54    | 63    | 93    | 84    | 73    | 76    | Prr22   |        |
| Prr23a1 | 6     | 12    | 16    | 8     | 4     | 2     | 2     | 0     | 1     | 3     | 1     | 0     | 3     | 2     | 11    | 12    | 7     | 0     | 5     | 3     | 3     | 5     | 0     | 1     | 1     | 1     | 1     | 2     | Prr23a1 |        |
| Prr23a2 | 0     | 0     | 1     | 0     | 1     | 6     | 0     | 0     | 1     | 0     | 0     | 0     | 0     | 0     | 0     | 1     | 0     | 0     | 0     | 0     | 0     | 0     | 0     | 0     | 0     | 0     | 0     | 0     | Prr23a2 |        |
| Prr23a3 | 7     | 7     | 6     | 1     | 5     | 7     | 3     | 1     | 4     | 1     | 3     | 0     | 1     | 0     | 11    | 5     | 13    | 6     | 2     | 3     | 1     | 0     | 0     | 2     | 0     | 2     | 1     | 1     | Prr23a3 |        |
| Prr29   | 0     | 5     | 1     | 2     | 2     | 0     | 0     | 2     | 1     | 3     | 4     | 1     | 5     | 0     | 7     | 0     | 1     | 4     | 0     | 2     | 1     | 0     | 8     | 2     | 1     | 3     | 6     | 4     | Prr29   |        |
| Prr3    | 2825  | 3473  | 3161  | 3595  | 3045  | 3131  | 3063  | 2256  | 2688  | 2732  | 2675  | 2852  | 2384  | 2535  | 2822  | 3192  | 3369  | 3598  | 3034  | 2893  | 3001  | 2973  | 2445  | 2695  | 2707  | 2864  | 2508  | 2514  | Prr3    |        |
| Prr30   | 0     | 0     | 0     | 0     | 0     | 0     | 0     | 1     | 1     | 0     | 0     | 0     | 0     | 0     | 0     | 0     | 0     | 0     | 0     | 0     | 0     | 2     | 1     | 0     | 0     | 0     | 0     | 0     | Prr30   |        |
| Prr32   | 35    | 41    | 28    | 31    | 70    | 79    | 19    | 114   | 138   | 146   | 623   | 81    | 126   | 26    | 54    | 55    | 5     | 23    | 37    | 39    | 38    | 172   | 401   | 47    | 69    | 15    | 19    | 5     | Prr32   |        |
| Prr33   | 5     | 10    | 17    | 13    | 11    | 15    | 11    | 32    | 36    | 21    | 19    | 20    | 28    | 24    | 25    | 14    | 10    | 10    | 6     | 14    | 20    | 30    | 32    | 21    | 24    | 22    | 29    | 9     | Prr33   |        |
| Prr36   | 2320  | 2993  | 4151  | 4182  | 5429  | 4114  | 4100  | 5580  | 5946  | 8844  | 6499  | 9664  | 6793  | 8316  | 2280  | 2150  | 4795  | 4064  | 5876  | 3412  | 4345  | 10347 | 5377  | 9435  | 9853  | 9277  | 7174  | 7849  | Prr36   |        |
| Prr5    | 977   | 1374  | 1446  | 1181  | 1069  | 1016  | 755   | 355   | 548   | 523   | 703   | 411   | 552   | 383   | 885   | 1286  | 1276  | 1310  | 1070  | 830   | 868   | 556   | 653   | 473   | 471   | 543   | 493   | 436   | Prr5    |        |
| Prr5l   | 536   | 454   | 555   | 281   | 334   | 387   | 289   | 866   | 852   | 763   | 832   | 1089  | 962   | 923   | 426   | 495   | 442   | 349   | 347   | 283   | 317   | 652   | 882   | 916   | 681   | 1240  | 1032  | 1178  | Prr5l   |        |
| Prr7    | 271   | 345   | 344   | 417   | 395   | 344   | 316   | 469   | 558   | 634   | 613   | 726   | 523   | 554   | 264   | 238   | 366   | 414   | 418   | 309   | 366   | 668   | 484   | 721   | 709   | 752   | 636   | 541   | Prr7    |        |
| Prr9    | 0     | 0     | 0     | 0     | 0     | 0     | 0     | 0     | 1     | 0     | 0     | 0     | 0     | 1     | 0     | 1     | 0     | 0     | 0     | 0     | 0     | 0     | 0     | 0     | 0     | 0     | 0     | 0     | Prr9    |        |
| Prrc1   | 5313  | 5021  | 6125  | 6232  | 5677  | 5318  | 5046  | 3643  | 4467  | 4555  | 5489  | 4629  | 5012  | 4348  | 5073  | 5778  | 5873  | 6241  | 5335  | 4254  | 5089  | 4732  | 4608  | 4873  | 4604  | 5007  | 4431  | 4688  | Prrc1   |        |
| Prrc2a  | 31238 | 43086 | 55368 | 54852 | 48195 | 43609 | 36105 | 28992 | 37592 | 48779 | 45099 | 56416 | 44430 | 47345 | 28288 | 36012 | 55963 | 52721 | 52786 | 32394 | 42290 | 45654 | 34354 | 55318 | 50660 | 60098 | 44337 | 44930 | Prrc2a  |        |
| Prrc2b  | 24314 | 27238 | 33334 | 41818 | 46590 | 40005 | 36930 | 32425 | 39113 | 52602 | 47223 | 53333 | 44100 | 46361 | 22826 | 27506 | 39591 | 42619 | 45550 | 29712 | 40712 | 56335 | 35474 | 51591 | 56367 | 32532 | 41946 | 43441 | Prrc2b  |        |
| Prrc2c  | 36440 | 33188 | 33552 | 31373 | 32540 | 37385 | 32962 | 33088 | 35104 | 34342 | 36935 | 36114 | 37426 | 36820 | 34888 | 36409 | 25540 | 30957 | 29346 | 32134 | 35466 | 27795 | 32212 | 27660 | 53826 | 23233 | 38420 | 31991 | Prrc2c  |        |
| Prrg1   | 945   | 538   | 743   | 668   | 726   | 724   | 855   | 1071  | 1124  | 921   | 1176  | 876   | 1016  | 962   | 874   | 783   | 745   | 698   | 680   | 837   | 753   | 1008  | 1209  | 927   | 882   | 1050  | 932   | 964   | Prrg1   |        |
| Prrg2   | 291   | 331   | 256   | 266   | 251   | 273   | 227   | 554   | 625   | 594   | 663   | 603   | 679   | 672   | 280   | 303   | 319   | 298   | 221   | 238   | 234   | 523   | 603   | 661   | 535   | 707   | 651   | 662   | Prrg2   |        |
| Prrg3   | 2402  | 1991  | 2147  | 2176  | 2568  | 2775  | 2221  | 3228  | 3257  | 3279  | 3607  | 2864  | 3107  | 2758  | 2197  | 2252  | 2519  | 2270  | 2327  | 2290  | 2231  | 3768  | 3478  | 2878  | 3088  | 2227  | 2895  | 2737  | Prrg3   |        |
| Prrg4   | 556   | 364   | 268   | 231   | 195   | 221   | 166   | 137   | 153   | 98    | 116   | 85    | 133   | 76    | 411   | 506   | 273   | 229   | 181   | 202   | 220   | 70    | 186   | 95    | 66    | 61    | 64    | 81    | Prrg4   |        |
| Prrt1   | 945   | 1333  | 1650  | 2345  | 2553  | 2124  | 2385  | 1033  | 975   | 1742  | 1109  | 1449  | 976   | 1519  | 1052  | 929   | 2179  | 2539  | 2784  | 1914  | 2665  | 1920  | 992   | 1699  | 1649  | 1107  | 1216  | 1371  | Prrt1   |        |
| Prrt2   | 68    | 75    | 98    | 69    | 51    | 72    | 50    | 56    | 72    | 85    | 100   | 70    | 94    | 85    | 69    | 89    | 66    | 101   | 55    | 48    | 59    | 67    | 99    | 112   | 95    | 75    | 67    | 97    | Prrt2   |        |
| Prrt3   | 293   | 233   | 341   | 335   | 421   | 350   | 315   | 165   | 224   | 291   | 235   | 176   | 215   | 158   | 223   | 303   | 318   | 362   | 383   | 332   | 320   | 277   | 190   | 244   | 340   | 184   | 139   | 179   | Prrt3   |        |
| Prrt4   | 196   | 272   | 316   | 247   | 430   | 313   | 294   | 161   | 251   | 309   | 339   | 191   | 208   | 173   | 207   | 210   | 299   | 288   | 377   | 296   | 269   | 406   | 308   | 275   | 306   | 154   | 181   | 223   | Prrt4   |        |
| Prrx1   | 8126  | 3753  | 4259  | 2574  | 1501  | 4058  | 1821  | 11087 | 16341 | 11759 | 16510 | 7888  | 14376 | 8311  | 5893  | 6192  | 2980  | 2921  | 1831  | 1914  | 1578  | 10111 | 17410 | 10297 | 7553  | 10837 | 8341  | 8799  | Prrx1   |        |
| Prrx2   | 769   | 754   | 592   | 351   | 153   | 400   | 114   | 689   | 897   | 783   | 710   | 510   | 872   | 746   | 614   | 971   | 424   | 375   | 182   | 168   | 105   | 475   | 823   | 717   | 465   | 974   | 685   | 609   | Prrx2   |        |
| Prrx1l  | 209   | 251   | 228   | 163   | 786   | 170   | 59    | 607   | 615   | 657   | 876   | 201   | 1051  | 216   | 407   | 442   | 322   | 326   | 129   | 139   | 96    | 1064  | 539   | 144   | 466   | 40    | 261   | 370   | Prrx1l  |        |
| Prrs11  | 0     | 0     | 0     | 0     | 0     | 0     | 0     | 0     | 1     | 0     | 0     | 0     | 0     | 0     | 0     | 1     | 0     | 0     | 0     | 0     | 0     | 0     | 0     | 0     | 0     | 0     | 0     | 0     | Prrs11  |        |
| Prrs12  | 716   | 607   | 610   | 556   | 726   | 456   | 258   | 824   | 1007  | 750   | 1097  | 414   | 785   | 434   | 653   | 850   | 652   | 639   | 441   | 308   | 297   | 1034  | 995   | 618   | 628   | 351   | 482   | 434   | Prrs12  |        |
| Prrs16  | 220   | 236   | 168   | 219   | 59    | 97    | 112   | 4     | 7     | 6     | 8     | 8     | 6     | 5     | 222   | 308   | 177   | 205   | 102   | 160   | 141   | 3     | 11    | 13    | 8     | 5     | 7     | 9     | Prrs16  |        |
| Prrs21  | 0     | 0     | 0     | 0     | 0     | 0     | 0     | 1     | 0     | 0     | 0     | 0     | 0     | 0     | 0     | 0     | 0     | 0     | 0     | 0     | 0     | 0     | 0     | 0     | 0     | 0     | 0     | 0     | 0       | Prrs21 |
| Prrs22  | 8     | 0     | 0     | 1     | 0     | 1     | 0     | 22    | 34    | 3     | 20    | 4     | 5     | 3     | 4     | 9     | 0     | 3     | 0     | 0     | 0     | 13    | 23    | 23    | 1     | 10    | 3     | 5     | Prrs22  |        |
| Prrs23  | 1358  | 940   | 1569  | 765   | 759   | 765   | 660   | 1586  | 1782  | 1221  | 1540  | 1263  | 1233  | 1148  | 1108  | 1402  | 991   | 968   | 656   | 828   | 592   | 1171  | 1985  | 1544  | 800   | 1858  | 1316  | 1275  | Prrs23  |        |
| Prrs27  | 0     | 0     | 0     | 0     | 0     | 0     | 0     | 1     | 1     | 0     | 0     | 0     | 0     | 2     | 0     | 0     | 0     | 0     | 0     | 0     | 0     | 0     | 1     | 0     | 4     | 0     | 1     | 0     | Prrs27  |        |
| Prrs28  | 0     | 0     | 0     | 0     | 0     | 0     | 0     | 0     | 1     | 0     | 0     | 0     | 0     | 0     | 0     | 0     | 0     | 0     | 0     | 0     | 0     | 0     | 1     | 0     | 0     | 0     | 0     | 0     | Prrs28  |        |
| Prrs3   | 6     | 6     | 4     | 0     | 4     | 0     | 2     | 2     | 2     | 0     | 0     | 0     | 31    | 1     | 9     | 12    | 8     | 14    | 0     | 0     | 0     | 22    | 3     | 2     | 5     | 5     | 6     | 4     | Prrs3   |        |
| Prrs30  | 2     | 0     | 0     | 0     | 0     | 0     | 0     | 0     | 1     | 0     | 0     | 0     | 0     | 0     | 0     | 2     | 0     | 0     | 0     | 0     | 0     | 3     | 1     | 0     | 4     | 0     | 0     | 0     | Prrs30  |        |
| Prrs32  | 1     | 0     | 1     | 4     | 3     | 0     | 1     | 5     | 2     | 0     | 0     | 5     | 1     | 1     | 1     | 0     | 0     | 0     | 0     | 0     | 0     | 0     | 1     | 1     | 1     | 1     | 0     | 1     | Prrs32  |        |
| Prrs33  | 5     | 5     | 2     | 1     | 10    | 0     | 3     | 22    | 21    | 34    | 14    | 8     | 18    | 14    | 3     | 5     | 6     | 1     | 3     | 6     | 2     | 10    | 17    | 15    | 3     | 23    | 15    | 11    | Prrs33  |        |
| Prrs34  | 1     | 0     | 0     | 0     |       |       |       |       |       |       |       |       |       |       |       |       |       |       |       |       |       |       |       |       |       |       |       |       |         |        |

|         |       |       |       |       |       |       |       |       |       |       |       |       |       |       |       |       |       |       |       |       |       |       |       |       |       |       |       |       |         |       |
|---------|-------|-------|-------|-------|-------|-------|-------|-------|-------|-------|-------|-------|-------|-------|-------|-------|-------|-------|-------|-------|-------|-------|-------|-------|-------|-------|-------|-------|---------|-------|
| Pxl2b   | 1159  | 1461  | 1286  | 1261  | 1061  | 1068  | 915   | 657   | 690   | 712   | 690   | 630   | 695   | 575   | 1253  | 1293  | 1301  | 1128  | 1137  | 1253  | 965   | 541   | 691   | 821   | 622   | 691   | 817   | 706   | Pxl2b   |       |
| Pxl2c   | 1739  | 1241  | 1592  | 1417  | 1177  | 1246  | 1290  | 778   | 944   | 866   | 1147  | 771   | 897   | 816   | 1540  | 1646  | 1468  | 1402  | 1103  | 1194  | 1183  | 742   | 1144  | 851   | 764   | 935   | 790   | 888   | Pxl2c   |       |
| Psap    | 20964 | 25738 | 27159 | 26804 | 26575 | 25136 | 23652 | 22577 | 26858 | 28578 | 28428 | 26700 | 26080 | 26951 | 21854 | 24383 | 27527 | 27876 | 27115 | 23706 | 24690 | 27370 | 27829 | 28069 | 29159 | 28520 | 25451 | 26750 | Psap    |       |
| Psap1l  | 0     | 0     | 0     | 0     | 0     | 0     | 0     | 5     | 19    | 12    | 2     | 0     | 2     | 0     | 1     | 0     | 0     | 0     | 0     | 0     | 0     | 0     | 10    | 2     | 0     | 1     | 0     | 7     | Psap1l  |       |
| Psa1    | 19893 | 19759 | 17333 | 22512 | 18384 | 21367 | 20449 | 14957 | 13224 | 14401 | 12691 | 16109 | 14664 | 16211 | 19690 | 16369 | 19705 | 19382 | 22576 | 24629 | 21089 | 11637 | 12784 | 15319 | 16253 | 18533 | 16823 | 16256 | Psa1    |       |
| Pzca    | 0     | 3     | 6     | 4     | 1     | 2     | 1     | 2     | 3     | 2     | 2     | 0     | 0     | 3     | 0     | 0     | 0     | 0     | 0     | 1     | 0     | 0     | 2     | 0     | 5     | 2     | 3     | 2     | Pzca    |       |
| Psd     | 2323  | 3494  | 3163  | 6319  | 8784  | 6528  | 7007  | 4330  | 4932  | 6555  | 5253  | 5125  | 3631  | 4737  | 2764  | 2484  | 5538  | 7255  | 8178  | 6255  | 7773  | 8489  | 4514  | 6227  | 7922  | 3912  | 4138  | 3891  | Psd     |       |
| Psd2    | 2226  | 2915  | 3235  | 4522  | 6289  | 4834  | 4976  | 4537  | 4448  | 6113  | 4565  | 5025  | 4190  | 4790  | 2683  | 2320  | 4201  | 4998  | 5972  | 4660  | 5237  | 7447  | 4346  | 5444  | 6955  | 3828  | 4202  | 4307  | Psd2    |       |
| Psd3    | 7151  | 5485  | 3857  | 4810  | 6046  | 7240  | 6755  | 6974  | 6714  | 5238  | 5895  | 5037  | 5362  | 5422  | 6980  | 6177  | 4049  | 5237  | 5100  | 6778  | 6722  | 4949  | 5883  | 3992  | 5465  | 2902  | 5704  | 4908  | Psd3    |       |
| Psd4    | 55    | 59    | 52    | 43    | 43    | 39    | 26    | 74    | 163   | 124   | 139   | 92    | 105   | 74    | 65    | 83    | 31    | 37    | 21    | 52    | 31    | 74    | 174   | 75    | 71    | 55    | 112   | 89    | Psd4    |       |
| Psen1   | 5787  | 6083  | 5216  | 5528  | 5665  | 5828  | 5686  | 5503  | 5536  | 5874  | 5616  | 5760  | 5625  | 5608  | 5703  | 5476  | 5116  | 5444  | 5767  | 5379  | 6214  | 5820  | 5309  | 5298  | 5950  | 4336  | 5794  | 5861  | Psen1   |       |
| Psen2   | 812   | 1010  | 957   | 1009  | 862   | 949   | 870   | 407   | 448   | 453   | 643   | 452   | 455   | 446   | 837   | 1061  | 948   | 912   | 840   | 832   | 884   | 500   | 530   | 498   | 463   | 468   | 427   | 433   | Psen2   |       |
| Psenen  | 1345  | 1817  | 1836  | 1783  | 1816  | 1690  | 1930  | 1677  | 1929  | 1799  | 1928  | 1988  | 2206  | 2094  | 1391  | 1538  | 1845  | 1679  | 1916  | 2139  | 1737  | 1511  | 1964  | 2085  | 2058  | 2524  | 2427  | 2359  | Psenen  |       |
| Psg16   | 13    | 7     | 29    | 12    | 36    | 17    | 22    | 35    | 54    | 67    | 65    | 13    | 27    | 40    | 8     | 9     | 13    | 25    | 13    | 14    | 35    | 75    | 49    | 27    | 65    | 25    | 17    | 12    | Psg16   |       |
| Psg17   | 32    | 48    | 19    | 42    | 26    | 40    | 26    | 7     | 26    | 8     | 15    | 27    | 24    | 11    | 44    | 44    | 21    | 42    | 26    | 28    | 31    | 23    | 10    | 23    | 13    | 23    | 14    | 11    | Psg17   |       |
| Psg18   | 0     | 0     | 0     | 0     | 0     | 0     | 0     | 0     | 14    | 0     | 0     | 0     | 0     | 0     | 0     | 0     | 0     | 0     | 0     | 0     | 0     | 0     | 5     | 0     | 0     | 0     | 0     | 0     | 0       | Psg18 |
| Psg19   | 12    | 16    | 31    | 28    | 20    | 14    | 7     | 0     | 2     | 0     | 1     | 0     | 7     | 0     | 16    | 10    | 16    | 35    | 12    | 14    | 16    | 0     | 3     | 3     | 0     | 3     | 0     | 4     | Psg19   |       |
| Psg21   | 0     | 0     | 0     | 0     | 0     | 0     | 0     | 0     | 15    | 0     | 0     | 0     | 0     | 0     | 0     | 0     | 0     | 0     | 0     | 0     | 0     | 0     | 12    | 0     | 0     | 0     | 0     | 0     | 0       | Psg21 |
| Psg23   | 0     | 0     | 0     | 0     | 0     | 0     | 1     | 0     | 16    | 0     | 0     | 0     | 0     | 0     | 0     | 0     | 0     | 0     | 0     | 0     | 0     | 0     | 1     | 0     | 0     | 0     | 0     | 0     | 0       | Psg23 |
| Psg25   | 0     | 0     | 0     | 0     | 0     | 0     | 0     | 0     | 7     | 0     | 0     | 0     | 0     | 0     | 0     | 0     | 0     | 0     | 0     | 0     | 0     | 0     | 1     | 1     | 0     | 0     | 0     | 0     | 0       | Psg25 |
| Psg26   | 0     | 0     | 0     | 0     | 0     | 0     | 0     | 0     | 2     | 0     | 0     | 0     | 0     | 0     | 0     | 0     | 0     | 0     | 0     | 0     | 0     | 0     | 0     | 0     | 0     | 0     | 0     | 0     | 0       | Psg26 |
| Psg27   | 0     | 0     | 0     | 0     | 0     | 0     | 0     | 0     | 16    | 0     | 0     | 0     | 0     | 0     | 0     | 0     | 0     | 0     | 0     | 0     | 0     | 0     | 5     | 0     | 0     | 0     | 0     | 0     | 0       | Psg27 |
| Psg28   | 0     | 0     | 0     | 0     | 0     | 0     | 0     | 0     | 4     | 0     | 1     | 0     | 0     | 0     | 0     | 0     | 0     | 2     | 0     | 0     | 0     | 0     | 3     | 0     | 0     | 0     | 0     | 0     | 0       | Psg28 |
| Psg29   | 0     | 0     | 0     | 2     | 13    | 4     | 0     | 0     | 11    | 6     | 6     | 2     | 2     | 0     | 0     | 0     | 0     | 4     | 0     | 4     | 0     | 4     | 3     | 1     | 10    | 0     | 0     | 0     | 1       | Psg29 |
| Psp1    | 47106 | 35685 | 48668 | 46532 | 41419 | 43548 | 47631 | 46868 | 35969 | 42755 | 35445 | 49542 | 45053 | 53124 | 46802 | 38224 | 46648 | 41531 | 43616 | 47115 | 44598 | 39966 | 34886 | 47887 | 44267 | 57260 | 50850 | 52027 | Psp1    |       |
| Pskh1   | 2208  | 2020  | 1968  | 1546  | 1227  | 1576  | 1297  | 1921  | 2618  | 2128  | 2580  | 2241  | 2563  | 1943  | 1838  | 2158  | 1570  | 1503  | 1300  | 1431  | 1148  | 1915  | 2636  | 2228  | 1708  | 2725  | 2181  | 2273  | Pskh1   |       |
| Psm1    | 13008 | 11679 | 12296 | 10496 | 9703  | 10194 | 12288 | 12432 | 10766 | 9682  | 9106  | 11379 | 10798 | 12458 | 13444 | 12161 | 11317 | 10314 | 10622 | 13520 | 11168 | 9560  | 10751 | 10834 | 10536 | 13500 | 12184 | 13079 | Psm1    |       |
| Psm2    | 13220 | 12675 | 12493 | 11456 | 10468 | 10556 | 12859 | 11105 | 9327  | 8378  | 8386  | 9246  | 9048  | 10822 | 14373 | 11982 | 12043 | 11183 | 11137 | 13618 | 12377 | 8988  | 9041  | 9637  | 8913  | 10773 | 10280 | 11450 | Psm2    |       |
| Psm3    | 10555 | 9257  | 9716  | 9446  | 8845  | 8834  | 11061 | 10415 | 8896  | 8576  | 8147  | 8643  | 8612  | 10914 | 11265 | 9004  | 9649  | 8635  | 9084  | 11290 | 10770 | 8477  | 8926  | 9381  | 8541  | 9794  | 9667  | 10801 | Psm3    |       |
| Psm4    | 11918 | 10137 | 9850  | 9337  | 8886  | 8864  | 10706 | 11171 | 9937  | 9024  | 9180  | 9576  | 9607  | 11098 | 12977 | 10720 | 9888  | 9256  | 9273  | 12095 | 10111 | 8961  | 10280 | 9729  | 9434  | 11367 | 10462 | 11427 | Psm4    |       |
| Psm5    | 10364 | 9605  | 10464 | 8620  | 7450  | 7973  | 8996  | 7886  | 7253  | 6498  | 6788  | 7220  | 6999  | 7953  | 10519 | 10023 | 9463  | 8603  | 8648  | 9940  | 8326  | 6241  | 7354  | 7571  | 7091  | 9252  | 8365  | 8600  | Psm5    |       |
| Psm6    | 12442 | 10826 | 11891 | 10191 | 9371  | 9536  | 11373 | 11339 | 9753  | 9397  | 9177  | 10440 | 10703 | 12267 | 12088 | 10742 | 10820 | 9367  | 10431 | 11511 | 10665 | 9513  | 10202 | 10841 | 10325 | 12778 | 11695 | 13218 | Psm6    |       |
| Psm7    | 12333 | 14707 | 14516 | 13525 | 11817 | 12174 | 13634 | 10831 | 11278 | 10426 | 9906  | 11000 | 11657 | 12499 | 12606 | 13398 | 14020 | 12591 | 13419 | 14873 | 13276 | 8886  | 11451 | 12137 | 11452 | 13978 | 12829 | 13630 | Psm7    |       |
| Psm8    | 35    | 34    | 39    | 9     | 20    | 10    | 17    | 39    | 47    | 27    | 47    | 21    | 40    | 24    | 26    | 39    | 19    | 21    | 14    | 18    | 16    | 65    | 38    | 25    | 23    | 17    | 44    | 21    | Psm8    |       |
| Psm11   | 9788  | 10303 | 9980  | 9102  | 8415  | 8395  | 10216 | 8912  | 8882  | 8101  | 7825  | 8586  | 8698  | 9631  | 10011 | 9213  | 9589  | 8850  | 9277  | 10631 | 9598  | 7157  | 8963  | 8828  | 8435  | 10437 | 9597  | 10130 | Psm11   |       |
| Psm10   | 291   | 304   | 315   | 280   | 336   | 354   | 293   | 488   | 495   | 533   | 532   | 430   | 481   | 459   | 286   | 321   | 299   | 330   | 308   | 414   | 315   | 399   | 557   | 477   | 502   | 499   | 482   | 438   | Psm10   |       |
| Psm11   | 5     | 6     | 4     | 4     | 7     | 4     | 1     | 2     | 4     | 3     | 8     | 7     | 7     | 10    | 3     | 4     | 2     | 2     | 1     | 2     | 0     | 15    | 9     | 15    | 2     | 7     | 15    | 7     | Psm11   |       |
| Psm2    | 7131  | 8014  | 6938  | 6182  | 5402  | 5430  | 6831  | 5854  | 5671  | 4399  | 4770  | 5423  | 5641  | 6198  | 7446  | 7333  | 6608  | 5935  | 5668  | 7058  | 5918  | 4736  | 5847  | 5357  | 5375  | 6654  | 6266  | 6417  | Psm2    |       |
| Psm3    | 6120  | 8389  | 7075  | 7307  | 5668  | 6219  | 6162  | 4979  | 5922  | 5104  | 4928  | 5589  | 5480  | 5849  | 6142  | 7159  | 6969  | 6353  | 6807  | 7712  | 6374  | 3825  | 5923  | 5521  | 5366  | 6746  | 6262  | 6297  | Psm3    |       |
| Psm4    | 12560 | 13389 | 12588 | 12785 | 10738 | 11172 | 10841 | 10544 | 9495  | 9590  | 9374  | 10372 | 10181 | 9811  | 12642 | 11347 | 12604 | 11396 | 12506 | 12973 | 10822 | 8729  | 9776  | 10529 | 10262 | 11911 | 10892 | 10596 | Psm4    |       |
| Psm5    | 1993  | 2712  | 2460  | 2292  | 2243  | 2224  | 2263  | 2163  | 2263  | 2623  | 2272  | 2821  | 2569  | 2561  | 2020  | 2078  | 2348  | 2028  | 2465  | 2892  | 2148  | 1893  | 2264  | 2732  | 2488  | 3049  | 2903  | 2800  | Psm5    |       |
| Psm6    | 8957  | 10055 | 8578  | 7900  | 7345  | 7516  | 7778  | 9417  | 9471  | 8444  | 8220  | 9953  | 9628  | 10230 | 8479  | 8423  | 8691  | 7031  | 8456  | 8912  | 7520  | 7722  | 9470  | 9877  | 9109  | 11870 | 11035 | 11083 | Psm6    |       |
| Psm7    | 14627 | 13744 | 14064 | 12206 | 11345 | 10887 | 13437 | 14600 | 11899 | 11169 | 10674 | 13449 | 12598 | 14616 | 15227 | 12548 | 13505 | 11201 | 12109 | 14398 | 12681 | 11418 | 11593 | 13403 | 12304 | 15418 | 14556 | 15875 | Psm7    |       |
| Psm8    | 55    | 70    | 67    | 60    | 75    | 28    | 37    | 40    | 52    | 41    | 64    | 36    | 34    | 49    | 57    | 64    | 57    | 81    | 60    | 50    | 66    | 33    | 45    | 54    | 41    | 49    | 38    | 37    | Psm8    |       |
| Psm9    | 40    | 38    | 46    | 35    | 23    | 38    | 30    | 15    | 28    | 10    | 34    | 14    | 15    | 7     | 41    | 48    | 29    | 30    | 34    | 20    | 22    | 22    | 23    | 22    | 23    | 27    | 27    | 15    | Psm9    |       |
| Psmc1   | 17055 | 16508 | 19123 | 15704 | 13808 | 13892 | 15665 | 13503 | 12218 | 12559 | 11721 | 14133 | 13925 | 15933 | 17840 | 15724 | 17208 | 14295 | 15197 | 17473 | 14019 | 10998 | 11978 | 13451 | 12898 | 17322 | 15743 | 16372 | Psmc1   |       |
| Psmc2   | 10584 | 11014 | 11118 | 9683  | 8492  | 8629  | 9618  | 9434  | 8209  | 7871  | 7788  | 9826  | 9188  | 10143 | 10609 | 9548  | 9970  | 9034  | 8888  | 10554 | 8931  | 7865  | 8143  | 9054  | 8619  | 10957 | 10507 | 10871 | Psmc2   |       |
| Psmc3   | 11608 | 13522 | 13352 | 10970 | 9717  | 10235 | 10014 | 10214 | 11390 | 10132 | 10332 | 11827 | 11031 | 11857 | 11832 | 11811 | 11976 | 10138 | 11321 | 12487 | 10494 | 8228  | 11339 | 11406 | 10519 | 14348 | 13041 | 12823 | Psmc3   |       |
| Psmc3ip | 1096  | 1168  | 1424  | 1081  | 878   | 1012  | 1307  | 982   | 969   | 972   | 857   | 1294  | 1215  | 1540  | 969   | 945   | 1323  | 900   | 1220  | 1400  | 1103  | 628   | 901   | 1356  | 9128  | 1673  | 1477  | 1453  | Psmc3ip |       |
| Psmc4   | 10430 | 12315 | 11792 | 10151 | 8623  | 915   |       |       |       |       |       |       |       |       |       |       |       |       |       |       |       |       |       |       |       |       |       |       |         |       |

|         |       |       |       |       |       |       |       |       |       |       |       |       |       |       |       |       |       |       |       |       |       |       |       |       |       |       |       |       |         |
|---------|-------|-------|-------|-------|-------|-------|-------|-------|-------|-------|-------|-------|-------|-------|-------|-------|-------|-------|-------|-------|-------|-------|-------|-------|-------|-------|-------|-------|---------|
| Psph    | 926   | 1000  | 865   | 1025  | 870   | 859   | 1068  | 1088  | 1033  | 975   | 861   | 1164  | 1151  | 1273  | 869   | 787   | 909   | 906   | 933   | 1004  | 1047  | 882   | 944   | 1244  | 1178  | 1303  | 1278  | 1239  | Psph    |
| Pson    | 3     | 9     | 8     | 15    | 13    | 5     | 7     | 2     | 2     | 0     | 4     | 2     | 0     | 3     | 5     | 6     | 16    | 13    | 14    | 10    | 4     | 3     | 1     | 2     | 2     | 4     | 0     | 9     | Pson    |
| Psrc1   | 3635  | 4047  | 4785  | 3537  | 2743  | 3166  | 3320  | 2579  | 2818  | 2698  | 2447  | 4127  | 3495  | 4106  | 3328  | 3520  | 4232  | 3151  | 3670  | 3300  | 3166  | 1856  | 2416  | 3605  | 2947  | 5104  | 3947  | 4031  | Psrc1   |
| Pstk    | 1127  | 954   | 1013  | 930   | 1050  | 1042  | 1031  | 1198  | 1281  | 1176  | 1299  | 1196  | 1252  | 1292  | 1149  | 938   | 931   | 980   | 1050  | 975   | 1014  | 1128  | 1292  | 1221  | 992   | 1238  | 1297  | 1272  | Pstk    |
| Pstpip1 | 78    | 87    | 97    | 143   | 70    | 116   | 104   | 65    | 62    | 75    | 110   | 64    | 74    | 65    | 69    | 95    | 100   | 145   | 88    | 92    | 96    | 55    | 87    | 47    | 52    | 86    | 64    | 64    | Pstpip1 |
| Pstpip2 | 23    | 10    | 66    | 13    | 34    | 22    | 35    | 29    | 34    | 35    | 70    | 23    | 18    | 19    | 46    | 61    | 124   | 75    | 36    | 66    | 40    | 63    | 54    | 41    | 20    | 4     | 15    | 34    | Pstpip2 |
| Ptafr   | 21    | 27    | 11    | 13    | 34    | 22    | 25    | 54    | 72    | 57    | 131   | 73    | 54    | 56    | 40    | 53    | 34    | 29    | 24    | 62    | 29    | 87    | 120   | 64    | 66    | 73    | 58    | 101   | Ptafr   |
| Ptaf1   | 8792  | 7479  | 7172  | 7813  | 7791  | 8959  | 9169  | 7740  | 6354  | 6079  | 6404  | 7753  | 7656  | 8166  | 8943  | 8205  | 7537  | 7416  | 7608  | 9459  | 8859  | 5730  | 6422  | 6007  | 6543  | 5736  | 8492  | 8270  | Ptaf1   |
| Ptbp1   | 23236 | 24676 | 21303 | 17638 | 13425 | 16011 | 13866 | 17573 | 22795 | 19523 | 20350 | 22504 | 23516 | 20696 | 18676 | 24512 | 18789 | 16404 | 15820 | 16148 | 13921 | 14088 | 21920 | 21083 | 17583 | 29255 | 22907 | 22953 | Ptbp1   |
| Ptbp2   | 20390 | 16243 | 20599 | 19334 | 20868 | 22907 | 23673 | 35473 | 27825 | 26774 | 25056 | 36297 | 31369 | 38114 | 23375 | 17890 | 21049 | 18832 | 21688 | 26306 | 21932 | 32108 | 26177 | 31517 | 34098 | 36778 | 37048 | 38554 | Ptbp2   |
| Ptbp3   | 14090 | 9346  | 9601  | 8749  | 7972  | 9115  | 8581  | 8954  | 8283  | 6225  | 7670  | 6635  | 8263  | 6563  | 13444 | 13237 | 8835  | 8741  | 7388  | 10227 | 8012  | 7183  | 8774  | 6061  | 5937  | 6608  | 6789  | 7187  | Ptbp3   |
| Ptcd1   | 1577  | 2263  | 1677  | 1921  | 1780  | 1719  | 1703  | 1661  | 1975  | 1782  | 1710  | 1748  | 1738  | 1606  | 1713  | 2017  | 1649  | 2040  | 1818  | 1841  | 1724  | 1915  | 1897  | 1696  | 1798  | 1534  | 1743  | 1712  | Ptcd1   |
| Ptcd2   | 1899  | 2146  | 1832  | 1745  | 1657  | 1588  | 1973  | 2168  | 1906  | 1810  | 1663  | 1866  | 1684  | 2006  | 2037  | 1975  | 1785  | 1869  | 1760  | 2102  | 1809  | 1917  | 2008  | 1785  | 1783  | 2030  | 1966  | 2059  | Ptcd2   |
| Ptcd3   | 9943  | 8480  | 7111  | 7143  | 6528  | 7302  | 7907  | 8258  | 6910  | 5633  | 5864  | 7117  | 6914  | 6972  | 10056 | 9256  | 6810  | 6824  | 6643  | 8445  | 7381  | 6136  | 6984  | 5932  | 6047  | 6857  | 7524  | 7122  | Ptcd3   |
| Ptch1   | 7074  | 6579  | 7260  | 7348  | 8085  | 6898  | 7111  | 8716  | 9175  | 8251  | 8706  | 9850  | 7097  | 9008  | 6870  | 6653  | 7562  | 7411  | 6713  | 6080  | 6981  | 9728  | 7970  | 7975  | 7765  | 8240  | 9941  | 9406  | Ptch1   |
| Ptch2   | 1072  | 907   | 1216  | 922   | 1021  | 886   | 860   | 662   | 957   | 830   | 655   | 942   | 569   | 791   | 779   | 896   | 1252  | 1000  | 1019  | 700   | 852   | 799   | 801   | 798   | 726   | 988   | 896   | 781   | Ptch2   |
| Ptchd1  | 172   | 120   | 82    | 158   | 259   | 247   | 165   | 457   | 419   | 361   | 413   | 164   | 243   | 147   | 171   | 142   | 140   | 143   | 191   | 238   | 160   | 530   | 386   | 180   | 432   | 71    | 196   | 170   | Ptchd1  |
| Ptchd3  | 1     | 1     | 0     | 1     | 0     | 1     | 0     | 0     | 2     | 0     | 1     | 2     | 5     | 2     | 0     | 3     | 2     | 0     | 0     | 1     | 0     | 2     | 5     | 0     | 0     | 4     | 1     | 1     | Ptchd3  |
| Ptchd4  | 96    | 137   | 47    | 49    | 69    | 101   | 45    | 164   | 147   | 96    | 105   | 70    | 159   | 100   | 112   | 104   | 57    | 50    | 48    | 123   | 56    | 102   | 230   | 67    | 89    | 71    | 134   | 81    | Ptchd4  |
| Ptcra   | 1     | 10    | 8     | 2     | 3     | 0     | 3     | 0     | 0     | 0     | 4     | 2     | 2     | 1     | 0     | 2     | 9     | 4     | 0     | 4     | 2     | 2     | 2     | 2     | 0     | 8     | 5     | 0     | Ptcra   |
| Ptdss1  | 6567  | 6511  | 5238  | 5523  | 5454  | 5322  | 5491  | 5162  | 4820  | 4231  | 4159  | 3913  | 4153  | 3924  | 6931  | 5921  | 5203  | 5676  | 5543  | 5757  | 5762  | 4739  | 4708  | 4071  | 4187  | 3955  | 3943  | 4035  | Ptdss1  |
| Ptdss2  | 3418  | 3994  | 3484  | 3344  | 3228  | 3197  | 3169  | 3147  | 3367  | 3173  | 3221  | 3163  | 3188  | 3026  | 3398  | 3664  | 3551  | 3394  | 3292  | 3153  | 3099  | 3055  | 3414  | 3352  | 3293  | 3480  | 3270  | 3254  | Ptdss2  |
| Pten    | 14704 | 10610 | 13154 | 16181 | 16450 | 16272 | 17654 | 12313 | 10574 | 11054 | 10851 | 10473 | 10377 | 11284 | 14991 | 12710 | 13580 | 16450 | 14825 | 14875 | 17276 | 12395 | 10572 | 10830 | 12161 | 9390  | 10261 | 11065 | Pten    |
| Pter    | 494   | 383   | 509   | 300   | 319   | 253   | 307   | 302   | 376   | 336   | 417   | 304   | 371   | 301   | 487   | 541   | 334   | 286   | 268   | 349   | 244   | 326   | 482   | 288   | 251   | 343   | 375   | 344   | Pter    |
| Ptf1a   | 8     | 70    | 1     | 23    | 25    | 22    | 15    | 32    | 35    | 26    | 18    | 1     | 58    | 6     | 51    | 62    | 43    | 12    | 13    | 37    | 6     | 35    | 24    | 5     | 19    | 10    | 6     | 1     | Ptf1a   |
| Ptldr   | 15    | 14    | 8     | 13    | 29    | 28    | 19    | 21    | 38    | 39    | 35    | 13    | 19    | 20    | 8     | 13    | 7     | 24    | 16    | 19    | 13    | 32    | 56    | 25    | 39    | 12    | 5     | 9     | Ptldr   |
| Ptgdr2  | 10    | 2     | 3     | 1     | 2     | 0     | 2     | 12    | 7     | 16    | 6     | 12    | 12    | 5     | 0     | 6     | 6     | 3     | 5     | 3     | 2     | 18    | 13    | 11    | 5     | 4     | 9     | 5     | Ptgdr2  |
| Ptges   | 9     | 18    | 11    | 70    | 380   | 164   | 115   | 227   | 525   | 293   | 452   | 43    | 45    | 61    | 25    | 19    | 30    | 257   | 121   | 175   | 194   | 485   | 794   | 234   | 394   | 67    | 44    | 17    | Ptges   |
| Ptger1  | 202   | 322   | 329   | 429   | 296   | 253   | 247   | 84    | 187   | 85    | 80    | 61    | 100   | 214   | 307   | 467   | 480   | 347   | 267   | 290   | 69    | 74    | 162   | 100   | 116   | 79    | 59    | 59    | Ptger1  |
| Ptger2  | 48    | 22    | 25    | 33    | 51    | 56    | 20    | 24    | 42    | 34    | 28    | 9     | 15    | 17    | 29    | 34    | 35    | 33    | 19    | 27    | 19    | 43    | 43    | 25    | 28    | 22    | 15    | 12    | Ptger2  |
| Ptger3  | 239   | 190   | 143   | 161   | 200   | 156   | 120   | 247   | 214   | 173   | 314   | 113   | 132   | 115   | 200   | 312   | 96    | 235   | 121   | 132   | 116   | 202   | 285   | 174   | 138   | 137   | 139   | 98    | Ptger3  |
| Ptger4  | 270   | 241   | 203   | 196   | 137   | 106   | 74    | 70    | 110   | 119   | 147   | 41    | 68    | 51    | 258   | 409   | 148   | 240   | 104   | 95    | 99    | 77    | 91    | 76    | 48    | 89    | 52    | 59    | Ptger4  |
| Ptges5  | 1588  | 1710  | 1313  | 975   | 716   | 936   | 468   | 387   | 468   | 445   | 539   | 318   | 490   | 302   | 1283  | 2235  | 903   | 1186  | 558   | 596   | 474   | 334   | 571   | 416   | 281   | 515   | 334   | 352   | Ptges5  |
| Ptges2  | 1987  | 2364  | 1781  | 2134  | 1912  | 1940  | 1839  | 1452  | 1346  | 1222  | 1076  | 1127  | 1145  | 1009  | 1900  | 1879  | 1910  | 2040  | 2117  | 1927  | 2070  | 1265  | 1306  | 1176  | 1214  | 1151  | 1124  | 1013  | Ptges2  |
| Ptges3  | 15443 | 11050 | 17013 | 14321 | 12413 | 12513 | 15490 | 14734 | 12803 | 12778 | 12865 | 15082 | 15110 | 17110 | 15535 | 13879 | 14746 | 13115 | 13461 | 13718 | 14325 | 13658 | 13356 | 14964 | 13544 | 19192 | 15969 | 17864 | Ptges3  |
| Ptges3l | 47    | 41    | 48    | 27    | 43    | 44    | 45    | 50    | 56    | 64    | 133   | 61    | 68    | 67    | 50    | 68    | 50    | 54    | 30    | 26    | 38    | 38    | 84    | 60    | 53    | 70    | 43    | 49    | Ptges3l |
| Ptgrfr  | 53    | 29    | 46    | 27    | 56    | 37    | 16    | 215   | 247   | 296   | 283   | 156   | 150   | 138   | 37    | 38    | 22    | 40    | 13    | 25    | 21    | 175   | 287   | 267   | 146   | 128   | 107   | 107   | Ptgrfr  |
| Ptgrfn  | 8215  | 7445  | 7996  | 7861  | 7906  | 7666  | 7774  | 6792  | 8834  | 8830  | 9684  | 9275  | 9212  | 8614  | 6624  | 7977  | 7759  | 8501  | 8656  | 7208  | 7887  | 6432  | 8961  | 9682  | 8394  | 9756  | 7775  | 8586  | Ptgrfn  |
| Ptgrj   | 52    | 63    | 30    | 60    | 66    | 30    | 32    | 70    | 92    | 126   | 128   | 63    | 111   | 64    | 69    | 104   | 80    | 61    | 59    | 51    | 33    | 114   | 72    | 46    | 50    | 51    | 70    | 68    | Ptgrj   |
| Ptgrs   | 514   | 642   | 693   | 493   | 365   | 414   | 268   | 487   | 542   | 451   | 856   | 499   | 691   | 491   | 517   | 771   | 523   | 375   | 351   | 364   | 310   | 485   | 825   | 467   | 423   | 790   | 625   | 564   | Ptgrs   |
| Ptgr1   | 1317  | 1206  | 1524  | 644   | 512   | 769   | 439   | 942   | 969   | 788   | 902   | 1068  | 1162  | 1054  | 1319  | 1559  | 951   | 888   | 542   | 728   | 529   | 597   | 1109  | 881   | 617   | 1335  | 1177  | 1195  | Ptgr1   |
| Ptgr2   | 1517  | 1259  | 1603  | 1365  | 1403  | 1379  | 1414  | 1291  | 1307  | 1160  | 1139  | 1407  | 1401  | 1312  | 1580  | 1403  | 1499  | 1325  | 1331  | 1570  | 1348  | 1198  | 1265  | 1260  | 1285  | 1216  | 1334  | 1346  | Ptgr2   |
| Ptgs1   | 386   | 383   | 362   | 270   | 277   | 320   | 201   | 296   | 433   | 407   | 591   | 280   | 403   | 258   | 331   | 406   | 220   | 343   | 224   | 270   | 238   | 389   | 500   | 348   | 293   | 391   | 372   | 280   | Ptgs1   |
| Ptgs2   | 31    | 31    | 23    | 15    | 7     | 14    | 16    | 27    | 28    | 24    | 45    | 21    | 19    | 21    | 24    | 62    | 17    | 19    | 14    | 9     | 5     | 18    | 48    | 29    | 11    | 29    | 8     | 15    | Ptgs2   |
| Pth     | 0     | 0     | 0     | 0     | 0     | 0     | 0     | 0     | 0     | 0     | 57    | 0     | 0     | 0     | 0     | 0     | 0     | 0     | 0     | 0     | 0     | 0     | 57    | 0     | 0     | 0     | 0     | 0     | Pth     |
| Pth1r   | 1456  | 1380  | 1437  | 832   | 797   | 1070  | 526   | 1470  | 2193  | 1643  | 2177  | 1428  | 1913  | 1138  | 1149  | 1547  | 1108  | 1043  | 840   | 652   | 566   | 1186  | 2186  | 1645  | 1032  | 1611  | 1563  | 1474  | Pth1r   |
| Pth2    | 3     | 1     | 0     | 9     | 2     | 3     | 6     | 2     | 1     | 0     | 1     | 1     | 7     | 0     | 2     | 5     | 0     | 5     | 1     | 3     | 2     | 1     | 0     | 5     | 0     | 6     | 5     | 5     | Pth2    |
| Pth2r   | 59    | 70    | 72    | 91    | 73    | 65    | 82    | 53    | 37    | 41    | 75    | 47    | 62    | 48    | 53    | 73    | 81    | 119   | 75    | 64    | 80    | 48    | 56    | 55    | 67    | 77    | 33    | 30    | Pth2r   |
| Pthlh   | 53    | 64    | 54    | 57    | 61    | 52    | 49    | 136   | 142   | 123   | 133   | 97    | 119   | 48    | 53    | 76    | 41    | 52    | 44    | 44    | 44    | 110   | 179   | 42    | 66    | 65    | 62    | 55    | Pthlh   |
| Ptk2    | 10743 | 10034 | 9093  | 8881  | 9180  | 9665  | 9667  | 11000 | 10125 | 10075 | 9499  | 11444 | 10629 | 11632 | 10307 | 9749  | 9056  | 8696  | 9186  | 9434  | 9315  | 9895  | 9800  | 10237 | 10727 | 10558 | 11518 | 11352 | Ptk2    |
| Ptk2b   | 208   | 226   | 150   | 157   | 141   | 113   | 89    | 89    | 113   | 93    | 109   | 47    | 109   | 61    | 170   | 185   |       |       |       |       |       |       |       |       |       |       |       |       |         |



|          |       |       |       |       |       |       |       |       |       |       |       |       |       |       |       |       |       |       |       |       |       |       |       |       |       |       |       |       |          |      |
|----------|-------|-------|-------|-------|-------|-------|-------|-------|-------|-------|-------|-------|-------|-------|-------|-------|-------|-------|-------|-------|-------|-------|-------|-------|-------|-------|-------|-------|----------|------|
| Ptpn9    | 3321  | 2485  | 2831  | 2666  | 3546  | 3206  | 3396  | 5628  | 5569  | 5416  | 5542  | 5663  | 5464  | 5860  | 2732  | 2630  | 2794  | 2790  | 3425  | 3102  | 3322  | 6057  | 5613  | 5447  | 5503  | 5874  | 5075  | 5488  | Ptpn9    |      |
| Ptpra    | 9957  | 10549 | 8819  | 9848  | 9704  | 9509  | 10335 | 9384  | 9372  | 9495  | 8387  | 8612  | 8122  | 8833  | 10337 | 9536  | 9456  | 9843  | 9830  | 10023 | 10629 | 9115  | 9697  | 8762  | 9137  | 9034  | 8116  | 8737  | Ptpra    |      |
| Ptprb    | 728   | 655   | 723   | 724   | 999   | 1104  | 788   | 1000  | 1298  | 1471  | 1884  | 1427  | 1523  | 1496  | 793   | 779   | 571   | 787   | 807   | 777   | 1026  | 1569  | 1607  | 1224  | 1679  | 1078  | 1601  | 1364  | Ptprb    |      |
| Ptprc    | 224   | 191   | 175   | 156   | 210   | 149   | 141   | 222   | 256   | 197   | 331   | 207   | 226   | 193   | 218   | 292   | 134   | 182   | 132   | 256   | 177   | 254   | 366   | 192   | 150   | 223   | 186   | 197   | Ptprc    |      |
| Ptprca   | 3     | 3     | 4     | 2     | 2     | 1     | 2     | 0     | 1     | 0     | 0     | 0     | 0     | 2     | 5     | 4     | 1     | 1     | 2     | 3     | 0     | 0     | 1     | 0     | 4     | 1     | 0     | 0     | Ptprca   |      |
| Ptprd    | 12904 | 10572 | 7470  | 11873 | 14939 | 16348 | 14553 | 17894 | 19275 | 18024 | 21559 | 12892 | 14580 | 14303 | 13854 | 12324 | 9259  | 13424 | 11186 | 13719 | 14630 | 17587 | 20404 | 13862 | 17640 | 8562  | 13382 | 11882 | Ptprd    |      |
| Ptpre    | 276   | 257   | 198   | 422   | 625   | 523   | 552   | 343   | 476   | 502   | 478   | 234   | 332   | 275   | 314   | 343   | 257   | 517   | 519   | 456   | 559   | 568   | 472   | 324   | 512   | 194   | 214   | 239   | Ptpre    |      |
| Ptprf    | 19362 | 25001 | 27941 | 25404 | 24923 | 23126 | 19853 | 18807 | 23265 | 24657 | 21572 | 27141 | 24485 | 22580 | 18250 | 22538 | 28327 | 25457 | 26397 | 18770 | 21519 | 22640 | 21275 | 25376 | 22221 | 21783 | 23050 | 23883 | Ptprf    |      |
| Ptprh    | 9     | 19    | 23    | 49    | 79    | 40    | 27    | 43    | 49    | 77    | 70    | 38    | 45    | 21    | 17    | 27    | 23    | 44    | 50    | 56    | 42    | 47    | 47    | 16    | 67    | 21    | 40    | 24    | Ptprh    |      |
| Ptpri    | 1042  | 973   | 969   | 1038  | 1400  | 1032  | 1012  | 1164  | 1332  | 1431  | 1370  | 925   | 1078  | 940   | 1021  | 1129  | 956   | 1181  | 1183  | 938   | 1064  | 1470  | 1259  | 1052  | 1215  | 818   | 924   | 878   | Ptpri    |      |
| Ptprk    | 5287  | 4520  | 4008  | 4265  | 4511  | 4432  | 4257  | 4395  | 4799  | 4405  | 4531  | 4000  | 4350  | 3800  | 4729  | 4879  | 3949  | 4339  | 4228  | 4597  | 4500  | 4385  | 4770  | 4086  | 3948  | 4007  | 4085  | 4029  | Ptprk    |      |
| Ptprm    | 1311  | 1351  | 1156  | 1467  | 1699  | 1429  | 1165  | 1318  | 1712  | 1806  | 2172  | 1334  | 1520  | 1290  | 1283  | 1487  | 1235  | 1468  | 1284  | 1025  | 1397  | 1823  | 1862  | 1428  | 1657  | 1302  | 1238  | 1168  | Ptprm    |      |
| Ptprn    | 1696  | 2388  | 2815  | 3627  | 4403  | 3144  | 3162  | 1315  | 1395  | 1938  | 1779  | 1592  | 1464  | 1472  | 1900  | 2101  | 3845  | 3532  | 3998  | 3035  | 3315  | 2418  | 1405  | 1622  | 1832  | 1315  | 1617  | 1531  | Ptprn    |      |
| Ptprn2   | 1737  | 2418  | 2165  | 3046  | 3362  | 3075  | 2568  | 2402  | 2380  | 2746  | 2257  | 3274  | 2437  | 2772  | 2108  | 1862  | 2868  | 2915  | 3268  | 2752  | 2732  | 3415  | 2090  | 2630  | 3317  | 2213  | 3022  | 2766  | Ptprn2   |      |
| Ptpro    | 1505  | 1650  | 1336  | 3029  | 4471  | 4080  | 4298  | 5506  | 5318  | 5587  | 4868  | 4581  | 3948  | 4845  | 2073  | 1470  | 2067  | 3386  | 3849  | 3645  | 4694  | 7596  | 4185  | 5034  | 7277  | 2911  | 4155  | 4123  | Ptpro    |      |
| Ptprq    | 53    | 71    | 61    | 42    | 65    | 72    | 51    | 127   | 118   | 103   | 101   | 98    | 96    | 93    | 57    | 54    | 56    | 73    | 41    | 56    | 50    | 165   | 153   | 91    | 139   | 60    | 88    | 100   | Ptprq    |      |
| Ptprs    | 313   | 456   | 265   | 438   | 798   | 443   | 419   | 837   | 794   | 596   | 862   | 278   | 594   | 259   | 492   | 495   | 328   | 569   | 463   | 549   | 458   | 1123  | 625   | 305   | 648   | 514   | 236   | 290   | Ptprs    |      |
| Ptprt    | 31298 | 44273 | 45613 | 55460 | 55275 | 50412 | 48019 | 37002 | 45394 | 56836 | 48556 | 63721 | 48008 | 52134 | 31324 | 35772 | 54814 | 56286 | 61389 | 42437 | 49919 | 55032 | 41066 | 62535 | 64555 | 15157 | 51582 | 48635 | Ptprt    |      |
| Ptprt    | 1252  | 1177  | 526   | 2461  | 5071  | 3841  | 4132  | 3285  | 3340  | 3934  | 3678  | 1546  | 1951  | 1729  | 1743  | 1189  | 1207  | 3171  | 3441  | 3525  | 4829  | 4580  | 3422  | 1964  | 3971  | 623   | 1441  | 1248  | Ptprt    |      |
| Ptpru    | 5392  | 6613  | 6598  | 7277  | 6101  | 6505  | 5920  | 2694  | 4287  | 4388  | 3790  | 5197  | 3737  | 4290  | 4548  | 5722  | 7291  | 7212  | 7466  | 5570  | 6064  | 3355  | 3262  | 5037  | 4452  | 5237  | 4220  | 3826  | Ptpru    |      |
| Ptprz1   | 25185 | 22570 | 14695 | 20426 | 25427 | 26975 | 31894 | 30140 | 26661 | 20410 | 17300 | 28449 | 13659 | 30089 | 27941 | 14530 | 20664 | 22459 | 25076 | 28599 | 30837 | 26065 | 20225 | 21127 | 24132 | 21934 | 26710 | 24426 | Ptprz1   |      |
| Ptprh1   | 354   | 435   | 416   | 493   | 268   | 333   | 344   | 1518  | 198   | 172   | 199   | 163   | 220   | 163   | 357   | 369   | 403   | 412   | 346   | 345   | 268   | 145   | 178   | 195   | 188   | 197   | 206   | 153   | Ptprh1   |      |
| Ptprh2   | 2932  | 2528  | 2721  | 2393  | 2423  | 2339  | 2684  | 3505  | 3207  | 2791  | 2782  | 3552  | 3137  | 3865  | 2896  | 2403  | 2757  | 2308  | 2561  | 3046  | 2633  | 2924  | 3043  | 3483  | 3299  | 4198  | 3755  | 4016  | Ptprh2   |      |
| Ptprhd1  | 148   | 187   | 175   | 161   | 180   | 192   | 178   | 530   | 503   | 543   | 523   | 522   | 531   | 656   | 166   | 150   | 148   | 105   | 188   | 191   | 182   | 413   | 517   | 570   | 592   | 685   | 662   | 629   | Ptprhd1  |      |
| Pts      | 2205  | 1894  | 2366  | 2054  | 2176  | 2260  | 2181  | 3048  | 2678  | 2872  | 2695  | 3170  | 3031  | 3297  | 2411  | 1811  | 2078  | 2057  | 2163  | 2305  | 2179  | 3166  | 2795  | 2997  | 2968  | 2783  | 2981  | 3189  | Pts      |      |
| Pttg1    | 1513  | 1697  | 1782  | 1584  | 1289  | 1281  | 1415  | 764   | 803   | 688   | 744   | 748   | 945   | 889   | 1688  | 1675  | 1613  | 1579  | 1254  | 1393  | 1292  | 632   | 898   | 712   | 593   | 888   | 876   | 869   | Pttg1    |      |
| Pttg1ip  | 6109  | 6480  | 5257  | 5440  | 4865  | 5043  | 4536  | 4205  | 4612  | 3886  | 4573  | 3806  | 4316  | 3632  | 6003  | 6587  | 5027  | 5332  | 4524  | 5316  | 4666  | 4114  | 5063  | 3884  | 4001  | 4487  | 3841  | 3890  | Pttg1ip  |      |
| Pttg1ip2 | 8     | 5     | 1     | 6     | 3     | 7     | 10    | 0     | 0     | 0     | 0     | 5     | 0     | 2     | 5     | 6     | 1     | 8     | 5     | 10    | 6     | 0     | 1     | 2     | 1     | 0     | 2     | 2     | Pttg1ip2 |      |
| Ptx3     | 714   | 687   | 1236  | 503   | 548   | 778   | 537   | 2194  | 2169  | 2116  | 2276  | 2745  | 2544  | 2811  | 918   | 775   | 1027  | 568   | 684   | 687   | 564   | 1724  | 2362  | 3053  | 2037  | 3793  | 2783  | 3089  | Ptx3     |      |
| Ptx4     | 6     | 4     | 3     | 3     | 2     | 3     | 0     | 2     | 3     | 0     | 1     | 3     | 1     | 2     | 7     | 2     | 0     | 14    | 7     | 1     | 3     | 5     | 11    | 0     | 2     | 3     | 3     | 0     | Ptx4     |      |
| Pudp     | 0     | 0     | 0     | 0     | 0     | 0     | 0     | 1     | 0     | 0     | 0     | 0     | 0     | 0     | 0     | 0     | 0     | 0     | 0     | 0     | 0     | 0     | 1     | 0     | 0     | 0     | 0     | 1     | 0        | Pudp |
| Puf60    | 6452  | 7884  | 7794  | 6252  | 5951  | 5961  | 6138  | 9898  | 10698 | 10330 | 9405  | 12202 | 10761 | 12204 | 6047  | 6326  | 7307  | 5709  | 6629  | 6267  | 6201  | 9606  | 10363 | 11679 | 10543 | 12967 | 12377 | 12715 | Puf60    |      |
| Pum1     | 6043  | 5713  | 8255  | 7906  | 7963  | 7429  | 8171  | 7761  | 8143  | 9942  | 9196  | 11448 | 9754  | 11799 | 6046  | 6052  | 8269  | 8282  | 8401  | 5981  | 8110  | 10661 | 7886  | 10806 | 10796 | 11692 | 9829  | 11568 | Pum1     |      |
| Pum2     | 22884 | 17691 | 17583 | 18709 | 21671 | 22517 | 24778 | 34054 | 28071 | 26586 | 25146 | 32104 | 29058 | 33662 | 23389 | 18552 | 19051 | 19226 | 21296 | 23685 | 23628 | 29955 | 26638 | 27710 | 29760 | 27853 | 32097 | 32442 | Pum2     |      |
| Pum3     | 7283  | 6797  | 7274  | 6081  | 5696  | 5829  | 6427  | 6417  | 5799  | 5515  | 5562  | 6114  | 6015  | 6659  | 7138  | 6650  | 6456  | 6023  | 5798  | 6889  | 5979  | 5101  | 5721  | 5884  | 5824  | 6944  | 6568  | 6643  | Pum3     |      |
| Pura     | 2743  | 2116  | 2635  | 2656  | 2485  | 3259  | 3030  | 2409  | 2197  | 1718  | 1932  | 2032  | 2051  | 2043  | 2778  | 2643  | 2427  | 2591  | 2592  | 3064  | 3267  | 1778  | 2249  | 1942  | 2053  | 2170  | 2199  | 1984  | Pura     |      |
| Purb     | 16035 | 10817 | 12464 | 11992 | 11243 | 13321 | 13058 | 11138 | 10542 | 10156 | 13274 | 11104 | 11891 | 11484 | 13969 | 14214 | 11586 | 12420 | 10358 | 10823 | 12682 | 10710 | 11479 | 9617  | 10308 | 9722  | 12035 | 11744 | Purb     |      |
| Purg     | 2569  | 2807  | 3863  | 4095  | 3547  | 3226  | 3627  | 2579  | 2258  | 2882  | 2896  | 2590  | 2447  | 2862  | 2817  | 2815  | 4124  | 3979  | 3897  | 2947  | 3666  | 3200  | 2408  | 3058  | 3046  | 2953  | 2338  | 2803  | Purg     |      |
| Pus1     | 1185  | 1576  | 1671  | 1495  | 1080  | 1171  | 1055  | 1044  | 1107  | 1286  | 1137  | 1263  | 1212  | 1253  | 1052  | 1394  | 1406  | 1271  | 1170  | 1101  | 1029  | 976   | 1178  | 1335  | 1190  | 1623  | 1373  | 1291  | Pus1     |      |
| Pus10    | 5547  | 4431  | 4189  | 4011  | 3447  | 4289  | 4722  | 3767  | 3225  | 2843  | 3242  | 3287  | 3869  | 3754  | 5575  | 5132  | 4403  | 3848  | 3754  | 4639  | 4205  | 2921  | 3383  | 3058  | 3096  | 3508  | 3647  | 4021  | Pus10    |      |
| Pus3     | 994   | 773   | 848   | 771   | 907   | 911   | 997   | 2111  | 1951  | 1497  | 1666  | 1963  | 1932  | 1994  | 1007  | 826   | 819   | 701   | 922   | 1125  | 854   | 1623  | 1847  | 1821  | 1652  | 2064  | 1948  | 2085  | Pus3     |      |
| Pus7     | 4840  | 4491  | 4429  | 4605  | 3741  | 4368  | 4257  | 2348  | 2399  | 2322  | 2615  | 2940  | 2605  | 2362  | 4551  | 4417  | 4152  | 4590  | 3949  | 4175  | 4202  | 2197  | 2367  | 2273  | 2352  | 2782  | 2456  | 2607  | Pus7     |      |
| Pus71    | 670   | 651   | 757   | 646   | 495   | 562   | 645   | 596   | 611   | 633   | 640   | 660   | 692   | 581   | 670   | 682   | 591   | 675   | 540   | 742   | 555   | 486   | 663   | 595   | 520   | 809   | 646   | 662   | Pus71    |      |
| Pus11    | 1673  | 1976  | 1594  | 1844  | 1733  | 1851  | 1742  | 916   | 1060  | 1117  | 1222  | 1206  | 1207  | 1051  | 1493  | 1834  | 1688  | 1984  | 1830  | 1769  | 1734  | 1054  | 1129  | 1118  | 1040  | 1094  | 1095  | 1106  | Pus11    |      |
| Pvalb    | 3     | 20    | 0     | 13    | 92    | 26    | 3     | 122   | 101   | 63    | 55    | 1     | 66    | 3     | 20    | 35    | 15    | 15    | 21    | 32    | 7     | 99    | 102   | 2     | 98    | 0     | 1     | 1     | Pvalb    |      |
| Pvr      | 248   | 208   | 226   | 242   | 422   | 293   | 279   | 636   | 677   | 739   | 842   | 426   | 538   | 462   | 272   | 278   | 217   | 243   | 281   | 273   | 267   | 685   | 679   | 562   | 567   | 539   | 406   | 414   | Pvr      |      |
| Pvrig    | 6     | 3     | 8     | 1     | 1     | 0     | 3     | 10    | 0     | 11    | 5     | 3     | 0     | 6     | 1     | 4     | 0     | 3     | 4     | 7     | 5     | 7     | 1     | 2     | 5     | 0     | 3     | 8     | Pvrig    |      |
| Pwp1     | 5523  | 5689  | 4615  | 4540  | 3953  | 4403  | 4775  | 4728  | 4373  | 3747  | 3663  | 4331  | 3997  | 4326  | 5759  | 5277  | 4509  | 4461  | 4253  | 5359  | 4564  | 3522  | 4198  |       |       |       |       |       |          |      |

|          |       |       |       |       |       |       |       |       |       |       |       |       |       |       |       |       |       |       |       |       |       |       |       |       |       |       |       |       |          |
|----------|-------|-------|-------|-------|-------|-------|-------|-------|-------|-------|-------|-------|-------|-------|-------|-------|-------|-------|-------|-------|-------|-------|-------|-------|-------|-------|-------|-------|----------|
| Qars     | 12975 | 14581 | 11572 | 10753 | 8200  | 9790  | 9708  | 8288  | 8539  | 6677  | 7009  | 8027  | 8002  | 8023  | 12192 | 12534 | 11277 | 10280 | 9870  | 10550 | 9820  | 6510  | 8548  | 7616  | 7159  | 9270  | 8829  | 8992  | Qars     |
| Qdpr     | 6095  | 6176  | 5632  | 5785  | 4351  | 4412  | 4482  | 3563  | 3414  | 3408  | 3441  | 3281  | 3411  | 3240  | 5773  | 5814  | 5463  | 5263  | 4864  | 4921  | 4755  | 3003  | 3420  | 3828  | 2958  | 4448  | 3403  | 3541  | Qdpr     |
| Qk       | 22968 | 16983 | 23637 | 19824 | 20862 | 22054 | 24424 | 35222 | 31159 | 29725 | 31062 | 40815 | 36118 | 42498 | 23169 | 19170 | 22527 | 18946 | 21773 | 20770 | 22591 | 33640 | 29134 | 33694 | 33690 | 39124 | 40983 | 43107 | Qk       |
| Qpct     | 502   | 413   | 477   | 333   | 398   | 362   | 315   | 385   | 367   | 393   | 333   | 297   | 251   | 295   | 584   | 576   | 418   | 362   | 334   | 413   | 328   | 398   | 344   | 315   | 288   | 325   | 373   | 310   | Qpct     |
| Qcctl    | 2095  | 2548  | 2207  | 2277  | 1953  | 2103  | 2228  | 1172  | 1273  | 1289  | 1370  | 1431  | 1415  | 1469  | 2022  | 2305  | 2369  | 2340  | 2119  | 1954  | 2078  | 1460  | 1276  | 1391  | 1295  | 1402  | 1392  | 1409  | Qcctl    |
| Qprt     | 102   | 98    | 163   | 58    | 48    | 37    | 36    | 39    | 62    | 36    | 96    | 103   | 76    | 121   | 71    | 107   | 94    | 35    | 64    | 56    | 28    | 42    | 89    | 52    | 59    | 131   | 162   | 157   | Qprt     |
| Qrpf     | 2     | 1     | 0     | 1     | 2     | 1     | 6     | 2     | 4     | 5     | 7     | 14    | 3     | 4     | 5     | 1     | 7     | 1     | 2     | 8     | 3     | 0     | 5     | 9     | 2     | 1     | 5     | 6     | Qrpf     |
| Qrfr     | 20    | 16    | 2     | 20    | 34    | 41    | 59    | 35    | 55    | 29    | 33    | 42    | 6     | 45    | 24    | 11    | 41    | 24    | 29    | 42    | 31    | 28    | 34    | 40    | 61    | 64    | 26    | 32    | Qrfr     |
| Qrfrp1   | 150   | 100   | 169   | 117   | 115   | 151   | 134   | 167   | 88    | 147   | 104   | 285   | 172   | 280   | 182   | 112   | 155   | 78    | 125   | 168   | 101   | 155   | 99    | 170   | 116   | 354   | 286   | 323   | Qrfrp1   |
| Qrich1   | 6308  | 6234  | 6719  | 6592  | 6433  | 5976  | 6669  | 7736  | 7232  | 7500  | 7076  | 8706  | 7741  | 8814  | 6348  | 5506  | 6895  | 6015  | 6960  | 5909  | 6476  | 8378  | 7349  | 8237  | 8080  | 9315  | 8447  | 8734  | Qrich1   |
| Qrich2   | 8     | 5     | 1     | 16    | 3     | 15    | 6     | 4     | 5     | 8     | 8     | 4     | 3     | 7     | 9     | 9     | 7     | 8     | 7     | 5     | 5     | 7     | 8     | 1     | 10    | 6     | 8     | 2     | Qrich2   |
| Qrsl1    | 603   | 577   | 532   | 524   | 558   | 570   | 587   | 1399  | 1330  | 1165  | 1182  | 1330  | 1304  | 1388  | 618   | 535   | 497   | 493   | 582   | 656   | 618   | 1118  | 1195  | 1109  | 1131  | 1188  | 1406  | 1453  | Qrsl1    |
| Qser1    | 9120  | 7197  | 7298  | 8565  | 9983  | 10974 | 11031 | 12760 | 11712 | 11761 | 11442 | 13274 | 12555 | 13762 | 8799  | 8081  | 7964  | 8282  | 9564  | 9016  | 10852 | 10611 | 10803 | 11213 | 12864 | 10819 | 13754 | 13027 | Qser1    |
| Qsox1    | 3982  | 5252  | 4895  | 4777  | 4679  | 4921  | 4033  | 2259  | 2786  | 2757  | 2854  | 2686  | 3333  | 2275  | 4135  | 5065  | 4869  | 4982  | 4668  | 4024  | 4260  | 2491  | 2964  | 2639  | 2655  | 2674  | 2574  | 2370  | Qsox1    |
| Qsox2    | 2458  | 2837  | 2772  | 2647  | 2135  | 2206  | 2294  | 1467  | 1664  | 1709  | 1723  | 2017  | 1909  | 1801  | 2352  | 2455  | 2675  | 2457  | 2251  | 2268  | 2157  | 1654  | 1681  | 1796  | 1707  | 1977  | 2040  | 1894  | Qsox2    |
| Qtrt1    | 1491  | 2097  | 1925  | 2179  | 1915  | 1671  | 1681  | 1425  | 1612  | 1606  | 1486  | 1681  | 1694  | 1654  | 1535  | 1797  | 2052  | 1931  | 2000  | 1836  | 1737  | 1514  | 1457  | 1761  | 1689  | 1805  | 1821  | 1690  | Qtrt1    |
| Qtrt2    | 3327  | 3165  | 2857  | 3230  | 2848  | 2601  | 3089  | 2947  | 2728  | 2624  | 2867  | 3090  | 2818  | 3100  | 3011  | 3178  | 3030  | 3266  | 2888  | 3050  | 2900  | 2674  | 2596  | 2879  | 2868  | 3408  | 3047  | 3096  | Qtrt2    |
| R3hcc1   | 2893  | 3176  | 3721  | 3327  | 3145  | 3074  | 2863  | 2412  | 2970  | 3082  | 3100  | 3259  | 3485  | 3401  | 2847  | 2974  | 3423  | 2960  | 3258  | 2970  | 3007  | 2473  | 2843  | 3330  | 2897  | 3946  | 3648  | 3787  | R3hcc1   |
| R3hcc11  | 2243  | 2073  | 2283  | 1832  | 1587  | 1512  | 1740  | 2179  | 1920  | 1637  | 1768  | 1951  | 1839  | 1986  | 2025  | 2104  | 2138  | 1754  | 1706  | 2013  | 1757  | 1805  | 1831  | 1975  | 1775  | 2080  | 1962  | 1963  | R3hcc11  |
| R3hdm1   | 13567 | 12463 | 11745 | 13365 | 14221 | 14466 | 15922 | 12064 | 11718 | 12038 | 11192 | 11941 | 11101 | 11980 | 13481 | 13241 | 12793 | 13428 | 13863 | 13546 | 15596 | 12325 | 10580 | 10715 | 15253 | 9910  | 11353 | 11153 | R3hdm1   |
| R3hdm2   | 4180  | 4336  | 4969  | 5784  | 6582  | 5802  | 5393  | 7272  | 8273  | 9776  | 9308  | 9640  | 8024  | 8876  | 4262  | 4113  | 5700  | 5996  | 6236  | 4480  | 5858  | 11067 | 7649  | 9847  | 10136 | 9509  | 7968  | 8200  | R3hdm2   |
| R3hdm4   | 6724  | 7882  | 9373  | 9469  | 8822  | 8027  | 8129  | 6449  | 7507  | 9177  | 8032  | 8543  | 7944  | 8588  | 6215  | 7046  | 9511  | 9093  | 9392  | 7064  | 8533  | 8174  | 6879  | 9491  | 8938  | 9051  | 7977  | 8515  | R3hdm4   |
| R3hdml   | 1     | 3     | 3     | 4     | 0     | 0     | 0     | 0     | 0     | 0     | 3     | 0     | 1     | 3     | 1     | 2     | 0     | 1     | 0     | 0     | 2     | 2     | 1     | 2     | 1     | 8     | 0     | 1     | R3hdml   |
| Rab10    | 18390 | 15825 | 17622 | 20363 | 21804 | 20746 | 23436 | 17862 | 15901 | 17095 | 16447 | 16308 | 15955 | 17476 | 19837 | 16889 | 18935 | 21523 | 20799 | 19444 | 23272 | 19584 | 16368 | 16726 | 18210 | 16138 | 15896 | 17368 | Rab10    |
| Rab11a   | 8771  | 6976  | 7927  | 8369  | 9002  | 8887  | 10547 | 9371  | 7257  | 6916  | 6488  | 6697  | 6595  | 7762  | 10076 | 7562  | 8058  | 8291  | 8398  | 9911  | 10336 | 8204  | 7575  | 6777  | 7504  | 5953  | 6814  | 7503  | Rab11a   |
| Rab11b   | 3989  | 4973  | 4470  | 4907  | 5744  | 5169  | 5174  | 8910  | 10250 | 10624 | 9664  | 11155 | 9844  | 10632 | 4250  | 4196  | 4808  | 4819  | 5618  | 5283  | 5672  | 10322 | 9741  | 10797 | 10984 | 11344 | 10113 | 11015 | Rab11b   |
| Rab11fp1 | 2455  | 2788  | 2598  | 2414  | 1246  | 1547  | 1348  | 418   | 416   | 436   | 427   | 478   | 510   | 458   | 2126  | 3361  | 2154  | 2053  | 1401  | 1363  | 1270  | 369   | 499   | 458   | 278   | 558   | 480   | 504   | Rab11fp1 |
| Rab11fp2 | 2573  | 1744  | 2061  | 2161  | 2832  | 2768  | 3010  | 5600  | 4936  | 4980  | 4802  | 4978  | 5229  | 4996  | 2507  | 1817  | 2117  | 2268  | 2553  | 2606  | 2722  | 5411  | 5106  | 4827  | 5245  | 3793  | 4817  | 4898  | Rab11fp2 |
| Rab11fp3 | 4683  | 5732  | 6365  | 7171  | 7155  | 6328  | 6138  | 5208  | 5955  | 7272  | 6628  | 7452  | 6224  | 7133  | 4381  | 5153  | 6711  | 7508  | 7260  | 5095  | 6529  | 7381  | 5304  | 7555  | 7780  | 6927  | 6306  | 6895  | Rab11fp3 |
| Rab11fp4 | 7387  | 8622  | 10471 | 10697 | 11622 | 10411 | 10098 | 8024  | 8881  | 10267 | 9201  | 9602  | 8850  | 9009  | 8019  | 8105  | 10629 | 10290 | 11433 | 9557  | 10283 | 10719 | 7522  | 9858  | 11866 | 7446  | 8969  | 9043  | Rab11fp4 |
| Rab11fp5 | 3697  | 4424  | 4679  | 4765  | 5428  | 5006  | 4449  | 1893  | 2328  | 2481  | 2623  | 2183  | 2194  | 1915  | 3724  | 4065  | 4949  | 5532  | 5382  | 3793  | 4853  | 2562  | 2515  | 2406  | 2449  | 1826  | 1841  | 1860  | Rab11fp5 |
| Rab12    | 5974  | 5469  | 6320  | 7041  | 6590  | 6419  | 7670  | 4829  | 4416  | 5270  | 4830  | 4936  | 4221  | 5267  | 6116  | 5430  | 6333  | 7000  | 6852  | 5631  | 7616  | 5549  | 4705  | 5374  | 5129  | 4958  | 4309  | 5052  | Rab12    |
| Rab13    | 1232  | 1323  | 1760  | 1253  | 1233  | 1242  | 1148  | 1152  | 1384  | 1400  | 1515  | 1387  | 1617  | 1469  | 1208  | 1435  | 1401  | 1248  | 1216  | 1429  | 1250  | 1233  | 1646  | 1495  | 1317  | 1742  | 1550  | 1486  | Rab13    |
| Rab14    | 15770 | 13006 | 15673 | 16823 | 17916 | 17197 | 19225 | 19825 | 16738 | 17498 | 17717 | 18380 | 17431 | 19015 | 16387 | 14088 | 15947 | 17607 | 17076 | 15789 | 18445 | 20546 | 17103 | 17723 | 18712 | 18425 | 17466 | 18724 | Rab14    |
| Rab15    | 1321  | 1159  | 1199  | 931   | 1550  | 1264  | 931   | 2237  | 2522  | 2438  | 2558  | 1441  | 2076  | 1381  | 1328  | 1328  | 1919  | 1136  | 1169  | 929   | 1014  | 2632  | 2598  | 1952  | 2109  | 1811  | 1392  | 1498  | Rab15    |
| Rab17    | 3     | 1     | 3     | 4     | 2     | 0     | 1     | 9     | 29    | 10    | 13    | 1     | 7     | 6     | 0     | 3     | 2     | 0     | 5     | 0     | 2     | 12    | 19    | 17    | 14    | 6     | 0     | 1     | Rab17    |
| Rab18    | 12491 | 9309  | 11636 | 12000 | 11490 | 10892 | 13118 | 10730 | 8946  | 9251  | 9621  | 9096  | 9029  | 9948  | 12853 | 10394 | 11638 | 11617 | 10676 | 11640 | 12137 | 9600  | 9086  | 9650  | 9788  | 9499  | 9024  | 9963  | Rab18    |
| Rab19    | 6     | 5     | 0     | 0     | 7     | 1     | 6     | 24    | 17    | 25    | 17    | 4     | 18    | 5     | 4     | 5     | 1     | 3     | 1     | 1     | 2     | 17    | 24    | 6     | 8     | 24    | 7     | 2     | Rab19    |
| Rab1a    | 16959 | 14263 | 16302 | 15829 | 15144 | 14400 | 17245 | 17088 | 14496 | 14989 | 14603 | 15458 | 14700 | 16319 | 17766 | 15252 | 16443 | 15512 | 14581 | 15694 | 16367 | 17037 | 15386 | 16473 | 15899 | 17154 | 15466 | 16487 | Rab1a    |
| Rab1b    | 5307  | 6601  | 5478  | 5417  | 5144  | 5363  | 4822  | 7584  | 8740  | 8160  | 7804  | 9052  | 8219  | 8466  | 5126  | 5447  | 5748  | 4801  | 5718  | 5239  | 4989  | 7167  | 8718  | 8244  | 7952  | 9772  | 8667  | 8588  | Rab1b    |
| Rab20    | 242   | 276   | 171   | 233   | 128   | 102   | 126   | 34    | 33    | 33    | 27    | 23    | 29    | 17    | 216   | 291   | 204   | 206   | 139   | 134   | 115   | 25    | 45    | 27    | 24    | 22    | 29    | 15    | Rab20    |
| Rab21    | 5026  | 4368  | 6540  | 6961  | 6335  | 5925  | 6328  | 4058  | 3617  | 4156  | 4375  | 4268  | 4180  | 4398  | 5169  | 5109  | 6315  | 6812  | 6039  | 4854  | 6592  | 5138  | 3867  | 4421  | 4852  | 4201  | 3942  | 4762  | Rab21    |
| Rab22a   | 5526  | 5165  | 5046  | 5565  | 5257  | 5564  | 5563  | 5461  | 5395  | 5681  | 6431  | 5582  | 5619  | 6164  | 5083  | 5382  | 5335  | 5684  | 5249  | 4722  | 5499  | 5880  | 5831  | 5477  | 5991  | 5201  | 5781  | 6020  | Rab22a   |
| Rab22b   | 2192  | 2183  | 2528  | 2724  | 2891  | 2599  | 2825  | 2590  | 2653  | 2948  | 2747  | 3000  | 2860  | 2979  | 2078  | 2230  | 2861  | 2708  | 2805  | 2609  | 2794  | 2819  | 2654  | 2861  | 3034  | 3229  | 2803  | 2972  | Rab22b   |
| Rab24    | 3392  | 3659  | 4252  | 3939  | 3379  | 3292  | 3396  | 3035  | 3015  | 3194  | 3296  | 3611  | 3375  | 3382  | 3175  | 3086  | 4278  | 3735  | 3711  | 3486  | 3304  | 3039  | 2952  | 3867  | 3356  | 4053  | 3183  | 3420  | Rab24    |
| Rab25    | 219   | 134   | 80    | 131   | 47    | 38    | 41    | 117   | 124   | 132   | 63    | 30    | 33    | 34    | 125   | 146   | 63    | 63    | 25    | 39    | 34    | 35    | 175   | 132   | 31    | 110   | 10    | 27    | Rab25    |
| Rab26    | 241   | 293   | 234   | 220   | 232   | 173   | 221   | 21    | 33    | 38    | 22    | 39    | 24    | 19    | 204   | 254   | 170   | 245   | 234   | 211   | 203   | 23    | 34    | 45    | 37    | 51    | 31    | 27</  |          |

|          |       |       |       |       |       |       |       |       |       |       |       |       |       |       |       |       |       |       |       |       |       |       |       |       |       |       |       |       |          |
|----------|-------|-------|-------|-------|-------|-------|-------|-------|-------|-------|-------|-------|-------|-------|-------|-------|-------|-------|-------|-------|-------|-------|-------|-------|-------|-------|-------|-------|----------|
| Rab4b    | 66    | 74    | 110   | 106   | 102   | 115   | 95    | 100   | 109   | 141   | 142   | 101   | 91    | 100   | 71    | 72    | 112   | 111   | 131   | 78    | 127   | 137   | 81    | 180   | 114   | 91    | 87    | 88    | Rab4b    |
| Rab5a    | 6852  | 5515  | 6912  | 6870  | 6932  | 7370  | 7801  | 6393  | 5586  | 6107  | 5774  | 6009  | 5883  | 6239  | 7253  | 6209  | 6685  | 6863  | 7190  | 7314  | 7205  | 6861  | 5828  | 5853  | 6133  | 6472  | 5993  | 6262  | Rab5a    |
| Rab5b    | 9259  | 9200  | 8897  | 8994  | 9485  | 8948  | 9814  | 9673  | 9526  | 8884  | 9075  | 9284  | 9110  | 9239  | 9315  | 8505  | 9188  | 9618  | 9421  | 9384  | 9298  | 10169 | 9607  | 9449  | 9939  | 9594  | 9231  | 9489  | Rab5b    |
| Rab5c    | 8017  | 10131 | 8857  | 9137  | 8977  | 9539  | 8373  | 7928  | 9143  | 8684  | 8450  | 8642  | 8869  | 8168  | 8331  | 8521  | 9441  | 9274  | 9798  | 9946  | 8935  | 7474  | 9230  | 8871  | 8868  | 9728  | 9019  | 8816  | Rab5c    |
| Rab5if   | 6090  | 6288  | 5215  | 5985  | 4437  | 4557  | 5618  | 3626  | 3250  | 3243  | 3050  | 3398  | 3282  | 3440  | 6100  | 5664  | 5465  | 5198  | 5103  | 5560  | 5358  | 3080  | 3393  | 3460  | 3214  | 3797  | 3492  | 3737  | Rab5if   |
| Rab6a    | 18748 | 14156 | 20153 | 21681 | 24094 | 21585 | 24259 | 18055 | 14713 | 17384 | 16927 | 15808 | 15974 | 16467 | 20368 | 16318 | 20234 | 21681 | 22097 | 19669 | 23545 | 20925 | 15165 | 16745 | 18242 | 16218 | 15567 | 17362 | Rab6a    |
| Rab6b    | 7757  | 9820  | 11480 | 14764 | 19312 | 15427 | 15840 | 12267 | 12648 | 16022 | 12685 | 13133 | 14816 | 12977 | 9781  | 9308  | 14263 | 15310 | 17596 | 13353 | 17204 | 19111 | 11582 | 14349 | 17498 | 9984  | 11859 | 12416 | Rab6b    |
| Rab7     | 14783 | 15190 | 14867 | 14839 | 14964 | 13967 | 14733 | 14461 | 13294 | 13740 | 13968 | 13975 | 13191 | 14210 | 15664 | 13749 | 15035 | 14696 | 15172 | 15151 | 14862 | 15665 | 13806 | 13820 | 14429 | 14084 | 13696 | 13887 | Rab7     |
| Rab7a    | 44    | 47    | 28    | 17    | 41    | 41    | 36    | 65    | 93    | 87    | 96    | 47    | 95    | 44    | 21    | 44    | 20    | 30    | 22    | 59    | 39    | 53    | 141   | 78    | 70    | 67    | 52    | 47    | Rab7a    |
| Rab8a    | 7098  | 7819  | 8027  | 7284  | 5818  | 6326  | 6765  | 5200  | 5146  | 4895  | 4978  | 5333  | 5499  | 5885  | 7142  | 6896  | 7460  | 6523  | 6728  | 7058  | 6670  | 4365  | 5414  | 5718  | 5301  | 6620  | 6172  | 6100  | Rab8a    |
| Rab8b    | 8772  | 7476  | 8352  | 8751  | 8191  | 8964  | 9877  | 6867  | 6384  | 5987  | 5803  | 7100  | 6143  | 7074  | 8905  | 7439  | 8536  | 8700  | 8266  | 8727  | 8670  | 6315  | 5887  | 6527  | 6872  | 6931  | 6639  | 6795  | Rab8b    |
| Rab9     | 2963  | 2769  | 2510  | 2688  | 2242  | 2429  | 2900  | 2304  | 1893  | 1966  | 1813  | 2023  | 2155  | 2364  | 3173  | 2798  | 2599  | 2597  | 2365  | 2898  | 2658  | 2015  | 2265  | 1977  | 1933  | 2317  | 1973  | 2309  | Rab9     |
| Rab9b    | 423   | 382   | 577   | 695   | 1006  | 893   | 850   | 1167  | 979   | 1233  | 1033  | 969   | 882   | 889   | 604   | 436   | 679   | 738   | 757   | 803   | 859   | 1669  | 988   | 1072  | 1252  | 644   | 803   | 838   | Rab9b    |
| Rabac1   | 2098  | 3252  | 2613  | 2786  | 2495  | 2294  | 2099  | 1973  | 2169  | 2108  | 2195  | 1717  | 1808  | 1556  | 2458  | 2453  | 2745  | 2567  | 2753  | 2975  | 2247  | 1928  | 2418  | 1813  | 1971  | 1664  | 1779  | 1546  | Rabac1   |
| Rabep1   | 12936 | 11579 | 11579 | 13837 | 15414 | 13965 | 16509 | 12463 | 10144 | 10325 | 9508  | 9404  | 8910  | 10137 | 14600 | 11692 | 12736 | 14990 | 14269 | 15452 | 15639 | 12106 | 9848  | 9905  | 11631 | 8102  | 8793  | 9371  | Rabep1   |
| Rabep2   | 679   | 809   | 852   | 903   | 716   | 774   | 620   | 987   | 1091  | 1034  | 1176  | 1007  | 1090  | 1034  | 637   | 802   | 852   | 671   | 752   | 693   | 633   | 949   | 1131  | 1128  | 1066  | 1233  | 1058  | 967   | Rabep2   |
| Rabepk   | 1527  | 1687  | 1520  | 1301  | 1207  | 1380  | 1258  | 834   | 952   | 830   | 843   | 754   | 858   | 873   | 1543  | 1571  | 1475  | 1396  | 1319  | 1463  | 1252  | 747   | 999   | 755   | 769   | 942   | 848   | 892   | Rabepk   |
| Rabgap1  | 13701 | 12679 | 11050 | 13795 | 13389 | 13732 | 14701 | 12281 | 10556 | 10848 | 9762  | 10548 | 9778  | 11134 | 13967 | 11573 | 12497 | 13629 | 12987 | 14546 | 14754 | 11326 | 10523 | 10572 | 11173 | 9482  | 10584 | 10239 | Rabgap1  |
| Rabgap1f | 3459  | 2533  | 2367  | 3431  | 4912  | 4679  | 4811  | 6072  | 5582  | 5579  | 5129  | 4271  | 4179  | 4332  | 3779  | 3229  | 2768  | 4061  | 4109  | 4751  | 4833  | 6067  | 5620  | 4614  | 6087  | 2665  | 3848  | 3809  | Rabgap1f |
| Rabgef1  | 2103  | 2319  | 2582  | 2768  | 2366  | 2312  | 2598  | 1868  | 1652  | 1881  | 1812  | 1818  | 1944  | 1908  | 2334  | 2319  | 2745  | 2702  | 2603  | 2298  | 2528  | 2214  | 1663  | 1962  | 2091  | 1823  | 1747  | 1982  | Rabgef1  |
| Rabggt1a | 690   | 868   | 810   | 845   | 1068  | 828   | 888   | 1319  | 1494  | 1571  | 1447  | 1481  | 1462  | 1418  | 713   | 731   | 937   | 859   | 982   | 908   | 874   | 1614  | 1522  | 1506  | 1696  | 1584  | 1332  | 1422  | Rabggt1a |
| Rabggtb  | 4005  | 4026  | 4015  | 4862  | 3553  | 3390  | 3713  | 4416  | 3756  | 3131  | 3380  | 3578  | 3509  | 3808  | 4292  | 3979  | 4018  | 4349  | 3581  | 4730  | 3468  | 3405  | 3808  | 3666  | 3388  | 4269  | 3642  | 3788  | Rabggtb  |
| Rabif    | 1488  | 1532  | 1514  | 1479  | 1579  | 1522  | 1467  | 2862  | 2711  | 2568  | 2470  | 2419  | 2473  | 2445  | 1644  | 1467  | 1534  | 1351  | 1536  | 1756  | 1341  | 2948  | 2752  | 2370  | 2681  | 2551  | 2430  | 2540  | Rabif    |
| RabI2    | 3456  | 3747  | 3612  | 3580  | 2971  | 2919  | 3210  | 2257  | 2056  | 2415  | 2137  | 2494  | 2452  | 2597  | 3319  | 3381  | 3577  | 3390  | 3116  | 2860  | 3069  | 2692  | 2241  | 2338  | 2244  | 2504  | 2471  | 2645  | RabI2    |
| RabI3    | 805   | 518   | 856   | 535   | 543   | 660   | 609   | 1625  | 1575  | 1229  | 1320  | 1801  | 1720  | 1924  | 741   | 581   | 673   | 471   | 534   | 720   | 558   | 1494  | 1415  | 1484  | 1324  | 1875  | 2185  | 2090  | RabI3    |
| RabI6    | 5298  | 5665  | 5820  | 5714  | 5578  | 5535  | 5302  | 5821  | 6469  | 7181  | 6828  | 7274  | 6865  | 6680  | 4970  | 5258  | 5691  | 5186  | 5926  | 5080  | 5420  | 6226  | 6388  | 7156  | 6978  | 7253  | 6930  | 6780  | RabI6    |
| Rac1     | 17267 | 15847 | 19663 | 18684 | 17963 | 16884 | 19956 | 16261 | 16523 | 18193 | 17815 | 19616 | 17856 | 19300 | 17256 | 16851 | 20614 | 18575 | 18627 | 15445 | 18795 | 18927 | 17359 | 19090 | 17818 | 21400 | 16854 | 19490 | Rac1     |
| Rac2     | 127   | 189   | 165   | 137   | 113   | 153   | 111   | 149   | 236   | 199   | 207   | 176   | 191   | 153   | 131   | 246   | 145   | 157   | 94    | 155   | 118   | 182   | 335   | 177   | 170   | 219   | 185   | 144   | Rac2     |
| Rac3     | 1640  | 2285  | 1972  | 2846  | 3175  | 2597  | 2144  | 2185  | 2516  | 3005  | 2528  | 1828  | 2006  | 1607  | 1721  | 2093  | 2471  | 2968  | 2849  | 2477  | 2508  | 2749  | 2829  | 2175  | 2777  | 1676  | 1750  | 1489  | Rac3     |
| Rcagap1  | 15052 | 16517 | 18046 | 16372 | 13598 | 14178 | 15825 | 10306 | 9943  | 11716 | 10024 | 16458 | 14239 | 16168 | 14210 | 14559 | 17919 | 15065 | 15438 | 12856 | 14957 | 9107  | 9114  | 13551 | 12744 | 18061 | 16214 | 16955 | Rcagap1  |
| Racg1    | 52176 | 60908 | 47306 | 43422 | 37548 | 40035 | 42021 | 44506 | 50716 | 32939 | 39464 | 42832 | 42325 | 41929 | 50095 | 54193 | 44004 | 41882 | 44926 | 49364 | 41853 | 33632 | 51606 | 46228 | 39157 | 50129 | 46571 | 47895 | Racg1    |
| Rad1     | 1420  | 1372  | 1459  | 1335  | 1160  | 1236  | 1474  | 1280  | 1244  | 1125  | 1111  | 1447  | 1331  | 1345  | 1375  | 1302  | 1462  | 1171  | 1276  | 1247  | 1216  | 1110  | 1167  | 1346  | 1228  | 1567  | 1417  | 1415  | Rad1     |
| Rad17    | 2701  | 2293  | 2216  | 2227  | 2055  | 2008  | 2305  | 2538  | 2227  | 2155  | 2176  | 2160  | 2157  | 2396  | 2447  | 2748  | 2145  | 2140  | 2018  | 2456  | 2170  | 2179  | 2183  | 2218  | 2384  | 2375  | 2428  | 2449  | Rad17    |
| Rad18    | 2045  | 1727  | 1699  | 1414  | 1136  | 1378  | 1593  | 1737  | 1715  | 1448  | 1578  | 2068  | 1992  | 2096  | 2028  | 1680  | 1571  | 1194  | 1202  | 1617  | 1480  | 1155  | 1612  | 1584  | 1511  | 2177  | 2349  | 2122  | Rad18    |
| Rad21    | 22729 | 18745 | 22474 | 19856 | 20174 | 21246 | 23189 | 27909 | 25200 | 24743 | 23748 | 31348 | 27228 | 32843 | 21559 | 19452 | 20825 | 19086 | 21178 | 21386 | 22330 | 24593 | 24461 | 28452 | 26746 | 32912 | 30690 | 32120 | Rad21    |
| Rad21a   | 39    | 42    | 39    | 53    | 79    | 46    | 45    | 10    | 18    | 9     | 12    | 8     | 7     | 14    | 45    | 40    | 44    | 39    | 24    | 55    | 60    | 13    | 19    | 7     | 17    | 7     | 6     | 7     | Rad21a   |
| Rad23a   | 2107  | 2658  | 2403  | 2256  | 2201  | 2088  | 2251  | 2194  | 2717  | 2873  | 2824  | 3379  | 2892  | 3130  | 1925  | 2147  | 2511  | 2284  | 2396  | 2252  | 2167  | 2236  | 2653  | 3128  | 2764  | 3771  | 3066  | 3290  | Rad23a   |
| Rad23b   | 27905 | 24604 | 29075 | 25837 | 24245 | 23718 | 28519 | 27307 | 23483 | 24367 | 23316 | 26881 | 25846 | 32843 | 28060 | 21656 | 27423 | 24126 | 26318 | 26197 | 29232 | 23616 | 23344 | 26986 | 25972 | 30612 | 27520 | 33460 | Rad23b   |
| Rad50    | 3530  | 2839  | 2918  | 2683  | 2673  | 2851  | 3064  | 2899  | 2882  | 2544  | 2671  | 3075  | 2973  | 3290  | 3049  | 2691  | 2545  | 2509  | 3102  | 2807  | 2707  | 2141  | 2970  | 2700  | 2532  | 2879  | 3359  | 2842  | Rad50    |
| Rad51    | 4474  | 3466  | 4235  | 2765  | 2052  | 2509  | 3084  | 3324  | 2960  | 2862  | 2856  | 4469  | 3859  | 4396  | 3705  | 3339  | 3284  | 2371  | 2651  | 3080  | 2503  | 1962  | 2660  | 3646  | 2797  | 5346  | 4875  | 5040  | Rad51    |
| Rad51ap1 | 3220  | 2776  | 2887  | 2234  | 1723  | 2090  | 2709  | 2391  | 2397  | 1933  | 1938  | 2838  | 2402  | 2889  | 3017  | 2745  | 2506  | 2025  | 2162  | 2720  | 2216  | 1484  | 1990  | 2235  | 2175  | 3125  | 2886  | 3013  | Rad51ap1 |
| Rad51ap2 | 63    | 28    | 37    | 32    | 38    | 52    | 49    | 33    | 44    | 32    | 29    | 23    | 42    | 27    | 57    | 48    | 45    | 19    | 38    | 40    | 29    | 32    | 52    | 26    | 13    | 41    | 31    | 33    | Rad51ap2 |
| Rad51c   | 412   | 416   | 316   | 289   | 235   | 293   | 312   | 354   | 310   | 260   | 243   | 352   | 313   | 349   | 359   | 359   | 345   | 273   | 281   | 355   | 273   | 201   | 290   | 335   | 270   | 378   | 407   | 374   | Rad51c   |
| Rad51b   | 781   | 734   | 1032  | 810   | 624   | 688   | 773   | 877   | 906   | 921   | 900   | 1062  | 1036  | 1194  | 728   | 699   | 897   | 717   | 754   | 778   | 717   | 754   | 864   | 1121  | 978   | 1469  | 1217  | 1138  | Rad51b   |
| Rad51d   | 858   | 997   | 876   | 918   | 927   | 1000  | 949   | 851   | 998   | 963   | 889   | 1016  | 1109  | 1084  | 920   | 856   | 972   | 931   | 1069  | 907   | 1013  | 911   | 959   | 1048  | 1026  | 1002  | 1081  | 1105  | Rad51d   |
| Rad52    | 1293  | 1495  | 1544  | 1505  | 1361  | 1343  | 1483  | 1762  | 1464  | 1568  | 1440  | 1471  | 1565  | 1592  | 1431  | 1356  | 1546  | 153   |       |       |       |       |       |       |       |       |       |       |          |

|          |       |       |       |       |       |       |       |       |       |       |       |       |       |       |       |       |       |       |       |       |       |       |       |       |       |       |       |       |          |
|----------|-------|-------|-------|-------|-------|-------|-------|-------|-------|-------|-------|-------|-------|-------|-------|-------|-------|-------|-------|-------|-------|-------|-------|-------|-------|-------|-------|-------|----------|
| Ranbp10  | 5395  | 5825  | 5172  | 5897  | 5212  | 5191  | 5138  | 4693  | 4896  | 5337  | 4893  | 5964  | 6296  | 5945  | 5101  | 5572  | 5648  | 5677  | 5802  | 4911  | 5254  | 5792  | 4853  | 5574  | 5857  | 5410  | 5585  | 6162  | Ranbp10  |
| Ranbp17  | 833   | 802   | 712   | 586   | 785   | 699   | 703   | 1319  | 1043  | 994   | 1009  | 1287  | 1274  | 1221  | 964   | 887   | 654   | 540   | 588   | 846   | 638   | 1091  | 1023  | 868   | 1057  | 975   | 1364  | 1213  | Ranbp17  |
| Ranbp2   | 35317 | 27706 | 18124 | 20183 | 19633 | 25625 | 25245 | 29688 | 24797 | 18083 | 20130 | 21962 | 22679 | 22292 | 35336 | 30448 | 18247 | 19185 | 19216 | 30468 | 24157 | 16533 | 23836 | 15526 | 19015 | 14637 | 25635 | 21801 | Ranbp2   |
| Ranbp3   | 5475  | 6513  | 6289  | 6409  | 5746  | 5805  | 5464  | 5816  | 6692  | 6906  | 6440  | 7995  | 7089  | 7252  | 4809  | 5501  | 6034  | 5668  | 6191  | 5654  | 5597  | 6027  | 6299  | 7508  | 7065  | 8472  | 7627  | 7024  | Ranbp3   |
| Ranbp3l  | 80    | 92    | 92    | 103   | 263   | 261   | 185   | 192   | 328   | 188   | 332   | 213   | 220   | 149   | 120   | 64    | 140   | 149   | 146   | 274   | 239   | 244   | 506   | 166   | 266   | 106   | 205   | 157   | Ranbp3l  |
| Ranbp6   | 5888  | 5650  | 5639  | 5479  | 5280  | 5265  | 5758  | 6879  | 5201  | 4744  | 4480  | 4817  | 4647  | 4734  | 6646  | 6108  | 5140  | 5542  | 5164  | 6535  | 5387  | 6109  | 5168  | 4524  | 5096  | 4294  | 5418  | 4836  | Ranbp6   |
| Ranbp9   | 4768  | 3681  | 5284  | 5210  | 6016  | 5150  | 5849  | 5208  | 4795  | 5681  | 5427  | 5794  | 4944  | 5961  | 4716  | 4433  | 5402  | 5648  | 6046  | 4626  | 5975  | 6605  | 4966  | 5806  | 5808  | 5741  | 5152  | 5612  | Ranbp9   |
| Rangap1  | 18628 | 22646 | 25420 | 24570 | 20535 | 20259 | 20433 | 11909 | 13583 | 14678 | 12989 | 17864 | 15710 | 16677 | 17900 | 20416 | 25297 | 23242 | 24070 | 18815 | 20924 | 12733 | 12463 | 16526 | 15179 | 20034 | 17422 | 17969 | Rangap1  |
| Rangrf   | 1051  | 1490  | 1579  | 1340  | 953   | 1058  | 1326  | 573   | 592   | 641   | 653   | 741   | 727   | 879   | 1088  | 1165  | 1471  | 1154  | 1160  | 1404  | 1125  | 443   | 656   | 755   | 702   | 996   | 867   | 871   | Rangrf   |
| Rap1a    | 5734  | 4215  | 5986  | 5366  | 4726  | 4947  | 5423  | 5004  | 4508  | 3808  | 4462  | 4511  | 4533  | 5250  | 6133  | 5517  | 5100  | 5061  | 4924  | 5539  | 5175  | 4482  | 4731  | 4514  | 4453  | 5105  | 4759  | 5295  | Rap1a    |
| Rap1b    | 13140 | 9446  | 12571 | 11806 | 11383 | 11620 | 11651 | 11466 | 9972  | 9359  | 10691 | 10497 | 10703 | 10529 | 13647 | 12252 | 11487 | 11432 | 11074 | 11153 | 11516 | 11353 | 11189 | 9965  | 10016 | 11655 | 10569 | 11208 | Rap1b    |
| Rap1gap  | 1110  | 1602  | 1490  | 1966  | 2851  | 1808  | 1589  | 1377  | 1762  | 1815  | 1786  | 988   | 1432  | 956   | 1344  | 1808  | 2011  | 2249  | 2196  | 1667  | 1748  | 2356  | 1588  | 1369  | 1677  | 891   | 949   | 853   | Rap1gap  |
| Rap1gap2 | 1024  | 1174  | 1092  | 1469  | 2176  | 1563  | 1550  | 1989  | 2167  | 2464  | 2167  | 1438  | 1791  | 1546  | 1162  | 1136  | 1301  | 1521  | 1622  | 1572  | 1547  | 2468  | 2079  | 2053  | 2261  | 1271  | 1234  | 1392  | Rap1gap2 |
| Rap1gds1 | 6560  | 6457  | 6972  | 7054  | 7791  | 7185  | 7306  | 5929  | 5765  | 6069  | 5846  | 6243  | 6592  | 6298  | 6835  | 6523  | 7092  | 7164  | 7321  | 5947  | 7273  | 7312  | 5752  | 5920  | 6276  | 6256  | 6125  | 6687  | Rap1gds1 |
| Rap2a    | 4803  | 5571  | 5920  | 6481  | 5998  | 5847  | 6107  | 3865  | 3899  | 4358  | 4013  | 4633  | 4122  | 4465  | 5023  | 5399  | 6572  | 6719  | 6458  | 5175  | 6253  | 4649  | 4127  | 4229  | 4979  | 4533  | 4379  | 4740  | Rap2a    |
| Rap2b    | 3667  | 3282  | 4178  | 4222  | 3404  | 3389  | 3737  | 2893  | 2861  | 2981  | 2988  | 3237  | 2952  | 3393  | 3571  | 3168  | 4171  | 3826  | 3375  | 3573  | 3593  | 2734  | 2986  | 3198  | 3157  | 4000  | 3151  | 3429  | Rap2b    |
| Rap2c    | 7998  | 5434  | 6865  | 5963  | 6175  | 6823  | 6873  | 8772  | 7662  | 7748  | 8344  | 8569  | 8308  | 8433  | 7730  | 7058  | 6642  | 6198  | 6311  | 6700  | 6294  | 8674  | 7938  | 7949  | 7925  | 8756  | 8168  | 8733  | Rap2c    |
| Rapgef1  | 7210  | 8041  | 8460  | 9026  | 9680  | 9158  | 8263  | 9850  | 11476 | 13002 | 11918 | 14323 | 11492 | 12728 | 6562  | 7086  | 9184  | 9264  | 10553 | 7006  | 9330  | 13075 | 10409 | 13888 | 13697 | 12636 | 11935 | 12871 | Rapgef1  |
| Rapgef2  | 4124  | 4137  | 3530  | 4706  | 5009  | 5124  | 4719  | 4161  | 4397  | 5032  | 4858  | 4388  | 4454  | 4249  | 4098  | 4348  | 3901  | 4867  | 4858  | 4415  | 4905  | 4654  | 4328  | 4408  | 4865  | 3072  | 3903  | 3841  | Rapgef2  |
| Rapgef3  | 600   | 809   | 966   | 697   | 819   | 874   | 645   | 464   | 615   | 710   | 907   | 679   | 719   | 566   | 592   | 810   | 926   | 796   | 823   | 689   | 689   | 698   | 723   | 671   | 744   | 675   | 651   | 583   | Rapgef3  |
| Rapgef4  | 301   | 299   | 380   | 456   | 745   | 512   | 662   | 766   | 765   | 792   | 703   | 457   | 524   | 527   | 357   | 325   | 311   | 522   | 567   | 617   | 700   | 1089  | 754   | 585   | 866   | 373   | 417   | 477   | Rapgef4  |
| Rapgef5  | 3234  | 3349  | 2470  | 3385  | 6235  | 5109  | 4636  | 8194  | 6770  | 7176  | 5935  | 5243  | 6150  | 5375  | 4212  | 3115  | 3327  | 3919  | 4752  | 5362  | 4916  | 8569  | 7302  | 5269  | 7545  | 3482  | 5577  | 5015  | Rapgef5  |
| Rapgef6  | 7706  | 6489  | 4138  | 5119  | 5240  | 5685  | 5976  | 6222  | 5914  | 4459  | 5230  | 4445  | 5058  | 4669  | 7356  | 7016  | 4658  | 5190  | 4593  | 6225  | 5651  | 4736  | 5499  | 3725  | 4928  | 2893  | 4729  | 4272  | Rapgef6  |
| Rapgef11 | 1937  | 2088  | 2261  | 2439  | 2810  | 2475  | 2272  | 922   | 1200  | 1256  | 1316  | 861   | 998   | 793   | 1667  | 2176  | 2635  | 2682  | 2730  | 1973  | 2486  | 1464  | 1212  | 1073  | 1245  | 707   | 801   | 866   | Rapgef11 |
| Raph1    | 5790  | 4717  | 5171  | 6277  | 8120  | 8204  | 7968  | 7342  | 7591  | 8412  | 9048  | 7761  | 7510  | 8176  | 5781  | 5801  | 5911  | 7202  | 7377  | 6121  | 7881  | 10475 | 7022  | 7174  | 9461  | 5881  | 7184  | 7257  | Raph1    |
| Rara     | 1425  | 2230  | 2107  | 2310  | 1794  | 1484  | 1188  | 1082  | 1585  | 1687  | 1904  | 1196  | 1533  | 965   | 1505  | 2223  | 2099  | 2238  | 1566  | 1263  | 1315  | 1298  | 1731  | 1378  | 1062  | 1626  | 1004  | 1053  | Rara     |
| Rarb     | 1120  | 794   | 737   | 593   | 658   | 416   | 421   | 1362  | 1551  | 1524  | 1769  | 1248  | 1407  | 1057  | 922   | 1133  | 499   | 576   | 396   | 424   | 399   | 1155  | 1796  | 1700  | 935   | 1936  | 1146  | 1180  | Rarb     |
| Rarg     | 1817  | 1716  | 1500  | 1064  | 740   | 1414  | 579   | 2246  | 3498  | 2884  | 3600  | 1620  | 2808  | 1672  | 1356  | 2164  | 1175  | 1345  | 796   | 590   | 569   | 2239  | 3351  | 2842  | 1699  | 3023  | 1930  | 1688  | Rarg     |
| Rarres1  | 20    | 19    | 24    | 24    | 34    | 28    | 20    | 37    | 34    | 15    | 32    | 13    | 18    | 14    | 37    | 19    | 24    | 35    | 19    | 20    | 19    | 20    | 42    | 20    | 8     | 11    | 22    | 15    | Rarres1  |
| Rarres2  | 33    | 27    | 24    | 39    | 49    | 55    | 40    | 60    | 97    | 77    | 164   | 73    | 74    | 73    | 47    | 41    | 29    | 80    | 52    | 48    | 39    | 79    | 185   | 78    | 104   | 80    | 50    | 46    | Rarres2  |
| Rars     | 11682 | 10754 | 11321 | 9018  | 7523  | 8186  | 8880  | 8132  | 7145  | 6527  | 6140  | 7577  | 7293  | 7777  | 12274 | 11135 | 9792  | 8719  | 7564  | 10323 | 8231  | 6266  | 7058  | 6778  | 6417  | 8498  | 7997  | 8434  | Rars     |
| Rars2    | 2832  | 2439  | 2854  | 2509  | 2223  | 2448  | 2809  | 2914  | 2605  | 2348  | 2586  | 2779  | 2660  | 2913  | 2860  | 2696  | 2720  | 2349  | 2422  | 2725  | 2469  | 2633  | 2699  | 2613  | 2508  | 2990  | 3001  | 3049  | Rars2    |
| Rasa1    | 10409 | 8011  | 8974  | 10390 | 10915 | 12171 | 13398 | 12853 | 10910 | 9833  | 10049 | 11463 | 10605 | 12391 | 10849 | 8791  | 9506  | 10343 | 11042 | 11481 | 13034 | 11732 | 10659 | 10109 | 11325 | 10205 | 11250 | 11532 | Rasa1    |
| Rasa2    | 1703  | 1206  | 1418  | 1400  | 1814  | 1860  | 1842  | 3181  | 3016  | 2702  | 3085  | 2700  | 2975  | 2997  | 1681  | 1615  | 1525  | 1282  | 1674  | 1764  | 1735  | 2919  | 2933  | 2517  | 2886  | 2423  | 2779  | 2617  | Rasa2    |
| Rasa3    | 5306  | 5743  | 5291  | 5235  | 5478  | 5528  | 4898  | 3085  | 3056  | 3136  | 3494  | 3039  | 3291  | 5295  | 5425  | 5687  | 5276  | 5335  | 5372  | 4983  | 4946  | 3566  | 3609  | 2918  | 3204  | 3173  | 3192  | 2809  | Rasa3    |
| Rasa4    | 1971  | 2624  | 2397  | 2610  | 2725  | 2424  | 2123  | 932   | 1046  | 998   | 1360  | 846   | 954   | 807   | 2041  | 2324  | 2533  | 2788  | 2591  | 2350  | 2138  | 1415  | 1189  | 930   | 961   | 765   | 968   | 803   | Rasa4    |
| Rasa11   | 14    | 8     | 7     | 17    | 14    | 14    | 31    | 21    | 27    | 6     | 11    | 7     | 0     | 12    | 12    | 9     | 14    | 43    | 34    | 39    | 46    | 30    | 48    | 12    | 24    | 8     | 3     | 7     | Rasa11   |
| Rasa12   | 9131  | 9064  | 6461  | 9335  | 9519  | 10019 | 10410 | 10651 | 9011  | 8867  | 8073  | 8388  | 8610  | 9184  | 9742  | 7843  | 7413  | 8680  | 8845  | 10184 | 10626 | 8662  | 8378  | 6824  | 9987  | 4589  | 9411  | 8402  | Rasa12   |
| Rasa13   | 23    | 22    | 33    | 16    | 23    | 35    | 20    | 34    | 40    | 41    | 63    | 47    | 40    | 28    | 34    | 41    | 25    | 20    | 16    | 18    | 20    | 50    | 54    | 25    | 28    | 25    | 46    | 40    | Rasa13   |
| Rasd1    | 63    | 86    | 86    | 75    | 74    | 63    | 54    | 27    | 31    | 36    | 27    | 37    | 39    | 36    | 63    | 83    | 80    | 39    | 68    | 55    | 34    | 32    | 47    | 44    | 20    | 63    | 43    | 23    | Rasd1    |
| Rasd2    | 204   | 275   | 339   | 462   | 647   | 407   | 383   | 72    | 78    | 74    | 121   | 15    | 56    | 24    | 241   | 319   | 458   | 406   | 526   | 275   | 489   | 115   | 103   | 52    | 102   | 19    | 5     | 24    | Rasd2    |
| Rasef    | 150   | 42    | 6     | 47    | 11    | 17    | 4     | 245   | 219   | 166   | 241   | 38    | 84    | 48    | 95    | 73    | 20    | 13    | 5     | 10    | 10    | 67    | 245   | 187   | 41    | 254   | 41    | 34    | Rasef    |
| Rasgef1a | 87    | 121   | 123   | 247   | 335   | 249   | 292   | 115   | 206   | 203   | 164   | 96    | 91    | 112   | 141   | 123   | 154   | 259   | 259   | 185   | 306   | 226   | 144   | 159   | 213   | 110   | 101   | 68    | Rasgef1a |
| Rasgef1b | 1631  | 1805  | 1479  | 2802  | 3057  | 2717  | 3163  | 3091  | 2973  | 3315  | 2539  | 2821  | 1898  | 3226  | 1880  | 1328  | 1874  | 2951  | 3010  | 2764  | 3503  | 2904  | 2755  | 3390  | 4191  | 2252  | 2404  | 2541  | Rasgef1b |
| Rasgef1c | 53    | 75    | 18    | 91    | 154   | 137   | 108   | 193   | 253   | 207   | 197   | 151   | 142   | 126   | 65    | 77    | 41    | 111   | 127   | 103   | 115   | 274   | 223   | 137   | 256   | 93    | 71    | 78    | Rasgef1c |
| Rasgrf1  | 340   | 447   | 431   | 551   | 928   | 670   | 810   | 183   | 227   | 217   | 217   | 103   | 96    | 101   | 419   | 400   | 447   | 771   | 829   | 708   | 773   | 236   | 182   | 143   | 274   | 47    | 41    | 71    | Rasgrf1  |
| Rasgrf2  | 60    | 60    | 44    | 163   | 384   | 229   | 231   | 244   | 299   | 320   | 279   | 126   | 147   | 133   | 83    | 69    | 101   | 242   | 241   | 201   | 264   | 483   | 270   | 172   | 372   | 53    | 86    | 90    | Rasgrf2  |
| Rasgrf1  | 761   | 706   | 421   | 747   | 828   | 838   | 1043  | 812   |       |       |       |       |       |       |       |       |       |       |       |       |       |       |       |       |       |       |       |       |          |



|         |       |       |       |       |       |       |       |       |       |       |       |       |       |       |       |       |       |       |       |       |       |       |       |       |       |       |       |       |         |
|---------|-------|-------|-------|-------|-------|-------|-------|-------|-------|-------|-------|-------|-------|-------|-------|-------|-------|-------|-------|-------|-------|-------|-------|-------|-------|-------|-------|-------|---------|
| Rbbp9   | 3180  | 2514  | 2857  | 2399  | 2756  | 2629  | 2932  | 4796  | 4211  | 3894  | 4174  | 4304  | 4161  | 4492  | 3095  | 2569  | 2666  | 2446  | 2795  | 3212  | 2694  | 4324  | 4561  | 4170  | 4043  | 4760  | 4424  | 4676  | Rbbp9   |
| Rbc1k   | 4342  | 5549  | 4604  | 5097  | 5018  | 4896  | 4571  | 4575  | 5425  | 5755  | 5264  | 5736  | 5261  | 5283  | 4189  | 4674  | 5307  | 5016  | 5483  | 4495  | 4919  | 5260  | 5066  | 5394  | 5575  | 5292  | 5328  | 5384  | Rbc1k   |
| Rbfa    | 1653  | 2313  | 1861  | 1768  | 1571  | 1534  | 1418  | 828   | 1040  | 1002  | 882   | 943   | 895   | 904   | 1582  | 1808  | 1800  | 1654  | 1671  | 1543  | 1448  | 909   | 1067  | 882   | 948   | 1122  | 948   | 915   | Rbfa    |
| Rbfox1  | 1134  | 1442  | 1297  | 3252  | 5684  | 3837  | 3642  | 3596  | 3333  | 5018  | 4580  | 2427  | 3375  | 2554  | 2168  | 1562  | 2132  | 3713  | 3761  | 3766  | 4182  | 5484  | 3670  | 3153  | 4620  | 1173  | 1911  | 2040  | Rbfox1  |
| Rbfox2  | 20226 | 19547 | 21659 | 28965 | 33815 | 28216 | 27702 | 32110 | 32908 | 37783 | 37647 | 31433 | 30957 | 31124 | 21298 | 21121 | 25919 | 31486 | 30934 | 24983 | 29794 | 42847 | 31595 | 36407 | 42455 | 25442 | 28563 | 28944 | Rbfox2  |
| Rbfox3  | 789   | 1177  | 1219  | 2010  | 3296  | 2100  | 2129  | 1916  | 2202  | 3374  | 2673  | 2322  | 1994  | 2225  | 1069  | 906   | 1804  | 2478  | 2604  | 1846  | 2473  | 3213  | 2186  | 2761  | 3421  | 2125  | 1693  | 1774  | Rbfox3  |
| Rbis    | 5173  | 4016  | 4761  | 4735  | 4061  | 3802  | 6198  | 4731  | 3526  | 3724  | 4060  | 3938  | 4257  | 5478  | 5384  | 4045  | 4517  | 4393  | 4275  | 5160  | 5672  | 3643  | 3587  | 4320  | 4112  | 4515  | 4424  | 5444  | Rbis    |
| Rbks    | 87    | 79    | 68    | 53    | 76    | 45    | 55    | 34    | 40    | 34    | 48    | 58    | 35    | 60    | 45    | 64    | 56    | 56    | 49    | 70    | 55    | 48    | 38    | 40    | 41    | 62    | 38    | 40    | Rbks    |
| Rb1     | 4050  | 3058  | 3864  | 3305  | 2963  | 3442  | 3962  | 4645  | 4213  | 4212  | 3719  | 6115  | 4880  | 6201  | 3704  | 3285  | 3566  | 2962  | 3418  | 3664  | 3323  | 3521  | 3722  | 4688  | 4265  | 5744  | 6099  | 5987  | Rb1     |
| Rb2     | 3624  | 3505  | 3066  | 3470  | 3774  | 4018  | 3888  | 2507  | 2500  | 2534  | 2697  | 2343  | 2326  | 2435  | 3506  | 3335  | 3055  | 3766  | 3685  | 3483  | 3869  | 2699  | 2515  | 2379  | 2543  | 2197  | 2292  | 2134  | Rb2     |
| Rbm10   | 5014  | 6141  | 6250  | 5728  | 5889  | 5582  | 5058  | 7365  | 8374  | 8729  | 8163  | 9520  | 8532  | 9348  | 4805  | 5045  | 6189  | 5223  | 6350  | 5296  | 5328  | 7282  | 7875  | 9559  | 9147  | 9970  | 9883  | 9544  | Rbm10   |
| Rbm11   | 649   | 581   | 628   | 606   | 599   | 645   | 670   | 145   | 136   | 179   | 152   | 92    | 118   | 123   | 775   | 690   | 698   | 610   | 580   | 662   | 642   | 167   | 210   | 154   | 99    | 138   | 105   | 103   | Rbm11   |
| Rbm12   | 3276  | 2033  | 2871  | 2429  | 2486  | 2494  | 2514  | 4493  | 4158  | 3951  | 4023  | 5085  | 4588  | 4966  | 2970  | 2395  | 2611  | 2113  | 2318  | 2667  | 2253  | 4121  | 3952  | 4133  | 4503  | 5534  | 4875  | 4863  | Rbm12   |
| Rbm12b1 | 873   | 802   | 1094  | 971   | 1116  | 990   | 1071  | 1417  | 1230  | 992   | 1114  | 1153  | 1002  | 1242  | 894   | 874   | 1048  | 1053  | 1043  | 1228  | 1192  | 1298  | 1218  | 1057  | 1257  | 1043  | 1109  | 970   | Rbm12b1 |
| Rbm12b2 | 2588  | 2325  | 2977  | 3122  | 2802  | 2840  | 3047  | 3330  | 2477  | 2254  | 2472  | 2358  | 2307  | 2670  | 2745  | 2752  | 3177  | 3043  | 2907  | 3261  | 2944  | 2849  | 2572  | 2583  | 2607  | 2552  | 2496  | 2478  | Rbm12b2 |
| Rbm14   | 3047  | 3505  | 3053  | 3126  | 2923  | 2602  | 2711  | 2815  | 3113  | 3029  | 3095  | 3854  | 3191  | 3861  | 2689  | 2852  | 3329  | 2866  | 3206  | 2655  | 2907  | 2837  | 2816  | 3572  | 3217  | 3346  | 3352  | 3777  | Rbm14   |
| Rbm15   | 2067  | 1894  | 1670  | 1678  | 1348  | 1579  | 1719  | 2191  | 1704  | 1266  | 1382  | 1652  | 1537  | 1662  | 1924  | 2058  | 1628  | 1498  | 1449  | 2007  | 1752  | 1372  | 1712  | 1549  | 1589  | 2100  | 1927  | 1832  | Rbm15   |
| Rbm15b  | 7892  | 8485  | 9432  | 9725  | 8816  | 8456  | 8739  | 9645  | 9412  | 9948  | 9215  | 11415 | 9757  | 10841 | 7559  | 7207  | 9851  | 9359  | 10085 | 7418  | 9199  | 10659 | 8579  | 11628 | 11298 | 12375 | 10901 | 11660 | Rbm15b  |
| Rbm17   | 6692  | 6581  | 7982  | 6881  | 5702  | 5734  | 6395  | 6560  | 6063  | 7179  | 6856  | 7945  | 6922  | 8379  | 6620  | 6022  | 7434  | 6246  | 6067  | 6244  | 6139  | 6261  | 6275  | 7444  | 6852  | 9062  | 7711  | 8416  | Rbm17   |
| Rbm18   | 5996  | 5725  | 5704  | 6286  | 6061  | 6137  | 6886  | 8309  | 6052  | 6558  | 6423  | 7046  | 6117  | 6956  | 6626  | 5855  | 5986  | 5927  | 6316  | 7071  | 6693  | 7635  | 6699  | 6483  | 7233  | 6473  | 6777  | 6972  | Rbm18   |
| Rbm19   | 1464  | 1805  | 1766  | 1416  | 1258  | 1265  | 1226  | 2011  | 2438  | 2372  | 2304  | 2777  | 2790  | 2640  | 1295  | 1477  | 1510  | 1243  | 1524  | 1344  | 1200  | 2025  | 2233  | 2504  | 2534  | 3139  | 2866  | 2867  | Rbm19   |
| Rbm20   | 400   | 389   | 377   | 461   | 521   | 472   | 558   | 615   | 748   | 784   | 777   | 1025  | 906   | 975   | 359   | 401   | 542   | 514   | 557   | 543   | 519   | 505   | 885   | 1064  | 941   | 1061  | 834   | 945   | Rbm20   |
| Rbm22   | 3763  | 3746  | 4605  | 4577  | 4282  | 4053  | 4463  | 4656  | 4849  | 5537  | 5166  | 6701  | 5746  | 6663  | 3520  | 3780  | 4618  | 4296  | 4546  | 3528  | 4341  | 5559  | 4807  | 6147  | 5838  | 7276  | 5861  | 6605  | Rbm22   |
| Rbm24   | 551   | 396   | 756   | 635   | 718   | 606   | 716   | 688   | 608   | 697   | 1352  | 607   | 518   | 634   | 545   | 449   | 773   | 582   | 780   | 652   | 741   | 613   | 875   | 842   | 517   | 859   | 536   | 668   | Rbm24   |
| Rbm25   | 18754 | 14375 | 20180 | 20362 | 20261 | 22401 | 23177 | 27026 | 23865 | 2992  | 27972 | 31225 | 30132 | 34175 | 18948 | 16772 | 19766 | 19243 | 21002 | 19496 | 21905 | 27626 | 23172 | 29072 | 29091 | 2852  | 31164 | 31567 | Rbm25   |
| Rbm26   | 10869 | 8025  | 9585  | 9725  | 9619  | 10651 | 11962 | 11147 | 10280 | 10897 | 11693 | 11947 | 11721 | 12701 | 10370 | 9428  | 9791  | 9803  | 9882  | 9288  | 11227 | 11127 | 9759  | 11012 | 10859 | 10790 | 11998 | 12291 | Rbm26   |
| Rbm27   | 6801  | 5700  | 7197  | 8009  | 6995  | 7617  | 7849  | 6469  | 5492  | 6092  | 6064  | 6711  | 6255  | 7103  | 6870  | 6129  | 7149  | 7770  | 7183  | 6825  | 7542  | 6169  | 5238  | 6254  | 6790  | 6443  | 6678  | 6907  | Rbm27   |
| Rbm28   | 13144 | 13676 | 12726 | 12913 | 11400 | 11306 | 13021 | 9482  | 8778  | 8641  | 8904  | 9650  | 9029  | 10137 | 12955 | 13042 | 12725 | 12844 | 12273 | 11976 | 12541 | 8941  | 8497  | 9311  | 9211  | 8626  | 9616  | 9474  | Rbm28   |
| Rbm3    | 16576 | 14564 | 17013 | 15328 | 13979 | 16532 | 14702 | 21187 | 18926 | 16668 | 19801 | 23159 | 23578 | 26041 | 15672 | 14654 | 14932 | 13649 | 15385 | 19381 | 13761 | 15719 | 16877 | 20905 | 23140 | 28925 | 26503 | 27481 | Rbm3    |
| Rbm33   | 8450  | 8185  | 7396  | 9390  | 10902 | 10128 | 10579 | 13384 | 12756 | 14254 | 13448 | 15550 | 13283 | 14958 | 8410  | 7606  | 9113  | 9684  | 10798 | 9445  | 10793 | 14357 | 11413 | 17409 | 15433 | 9845  | 14214 | 13830 | Rbm33   |
| Rbm34   | 4037  | 3255  | 3810  | 3618  | 3299  | 3615  | 3927  | 2508  | 2252  | 2529  | 2570  | 3079  | 2851  | 3123  | 4054  | 3501  | 3502  | 3629  | 3117  | 3600  | 3540  | 2694  | 2336  | 2479  | 2566  | 3183  | 3029  | 3056  | Rbm34   |
| Rbm38   | 2418  | 3815  | 3467  | 2863  | 2266  | 2236  | 2161  | 1145  | 1388  | 1208  | 1144  | 1388  | 1946  | 1759  | 2314  | 2142  | 3310  | 2904  | 2906  | 2285  | 2091  | 1156  | 1205  | 1765  | 1404  | 2387  | 1796  | 2233  | Rbm38   |
| Rbm39   | 24220 | 18786 | 23040 | 20966 | 21966 | 23091 | 24939 | 49034 | 41837 | 39737 | 40950 | 44789 | 42135 | 45645 | 25440 | 21073 | 22556 | 20819 | 22946 | 26853 | 23324 | 40952 | 41730 | 42002 | 39849 | 44687 | 43985 | 44791 | Rbm39   |
| Rbm4    | 864   | 599   | 460   | 612   | 616   | 701   | 684   | 819   | 702   | 568   | 618   | 620   | 548   | 726   | 781   | 722   | 520   | 523   | 523   | 722   | 712   | 695   | 654   | 516   | 643   | 499   | 771   | 568   | Rbm4    |
| Rbm41   | 1629  | 1170  | 1179  | 1467  | 1582  | 1790  | 1783  | 2446  | 1910  | 1745  | 1840  | 1875  | 1818  | 2011  | 1820  | 1442  | 1356  | 1349  | 1492  | 1876  | 1769  | 1858  | 1860  | 1660  | 1948  | 1217  | 1835  | 1871  | Rbm41   |
| Rbm42   | 9     | 10    | 22    | 11    | 10    | 12    | 12    | 15    | 18    | 14    | 14    | 14    | 2     | 19    | 8     | 11    | 16    | 12    | 19    | 13    | 11    | 17    | 13    | 12    | 17    | 12    | 19    | 11    | Rbm42   |
| Rbm43   | 397   | 263   | 383   | 257   | 317   | 261   | 266   | 463   | 484   | 428   | 473   | 452   | 452   | 437   | 406   | 387   | 346   | 266   | 249   | 284   | 249   | 406   | 566   | 397   | 393   | 590   | 454   | 436   | Rbm43   |
| Rbm44   | 58    | 35    | 65    | 25    | 23    | 30    | 21    | 42    | 50    | 52    | 68    | 66    | 103   | 47    | 46    | 50    | 48    | 31    | 14    | 32    | 21    | 92    | 66    | 33    | 22    | 34    | 44    | 27    | Rbm44   |
| Rbm45   | 4119  | 4237  | 3995  | 4192  | 3863  | 3931  | 4422  | 4241  | 3868  | 3778  | 3646  | 4438  | 4073  | 4453  | 4130  | 4023  | 4174  | 3854  | 4062  | 4441  | 4060  | 3888  | 3854  | 4141  | 3967  | 4408  | 4595  | 4562  | Rbm45   |
| Rbm46   | 503   | 318   | 573   | 405   | 380   | 409   | 323   | 282   | 266   | 267   | 369   | 210   | 342   | 231   | 583   | 600   | 501   | 432   | 313   | 333   | 256   | 289   | 344   | 208   | 161   | 309   | 255   | 214   | Rbm46   |
| Rbm47   | 115   | 74    | 131   | 120   | 122   | 96    | 80    | 234   | 308   | 290   | 262   | 260   | 391   | 221   | 91    | 163   | 122   | 87    | 97    | 112   | 80    | 296   | 461   | 373   | 208   | 329   | 229   | 214   | Rbm47   |
| Rbm48   | 760   | 631   | 749   | 693   | 675   | 701   | 832   | 1044  | 815   | 833   | 835   | 908   | 688   | 956   | 799   | 695   | 727   | 774   | 653   | 724   | 746   | 931   | 778   | 917   | 884   | 1038  | 832   | 946   | Rbm48   |
| Rbm4b   | 3211  | 3094  | 3349  | 3422  | 4449  | 4330  | 4281  | 9254  | 7458  | 7516  | 6701  | 8409  | 7117  | 8507  | 3694  | 2780  | 3845  | 3497  | 4583  | 4568  | 4480  | 8545  | 7351  | 7683  | 8456  | 7288  | 8126  | 8148  | Rbm4b   |
| Rbm5    | 18175 | 15757 | 15293 | 16871 | 18819 | 18445 | 19088 | 33091 | 28716 | 29803 | 30280 | 28030 | 27041 | 29495 | 17922 | 15386 | 15288 | 16789 | 18503 | 19167 | 18628 | 31707 | 27513 | 28517 | 30692 | 22875 | 27935 | 26527 | Rbm5    |
| Rbm6    | 13433 | 12920 | 14570 | 13902 | 13214 | 13722 | 15008 | 15369 | 13261 | 15030 | 14029 | 15727 | 14787 | 16779 | 13863 | 12509 | 14139 | 13522 | 14210 | 14050 | 14220 | 15214 | 12885 | 15812 | 16032 | 15218 | 16154 | 16422 | Rbm6    |
| Rbm7    | 4210  | 3314  | 3833  | 3439  | 3174  | 3628  | 3940  | 5383  | 4214  | 3613  | 3687  | 4525  | 4211  | 4493  | 4278  | 3722  | 3387  | 3148  | 3237  | 4210  | 3504  | 4012  | 4465  | 3970  | 3822  | 4923  | 4485  | 4576  |         |

|         |       |       |       |       |       |       |       |       |       |       |       |       |       |       |       |       |       |       |       |       |       |       |       |       |       |       |       |       |         |
|---------|-------|-------|-------|-------|-------|-------|-------|-------|-------|-------|-------|-------|-------|-------|-------|-------|-------|-------|-------|-------|-------|-------|-------|-------|-------|-------|-------|-------|---------|
| Rchy1   | 2716  | 2365  | 2591  | 2894  | 2757  | 2857  | 3027  | 3845  | 3419  | 3439  | 3492  | 3644  | 3359  | 3711  | 2851  | 2414  | 2621  | 2758  | 2918  | 2636  | 2807  | 3679  | 3529  | 3452  | 3669  | 3805  | 3525  | 3730  | Rchy1   |
| Rc1     | 3110  | 3461  | 2649  | 2656  | 2144  | 2363  | 2392  | 1263  | 1336  | 1077  | 1221  | 1194  | 1369  | 1244  | 2773  | 3255  | 2602  | 2586  | 2439  | 2602  | 2423  | 894   | 1342  | 1199  | 1089  | 1706  | 1332  | 1302  | Rc1     |
| Rcn1    | 12153 | 9810  | 11913 | 8094  | 6785  | 8622  | 7182  | 10574 | 11755 | 10397 | 13096 | 9925  | 11578 | 11099 | 11813 | 11603 | 9574  | 8797  | 6870  | 7495  | 6805  | 9356  | 13217 | 10732 | 9134  | 12907 | 10662 | 12140 | Rcn1    |
| Rcn2    | 8920  | 7917  | 9849  | 7901  | 7265  | 7858  | 8329  | 12125 | 10254 | 9984  | 10326 | 12852 | 11439 | 13921 | 9103  | 7962  | 9084  | 7312  | 7819  | 8103  | 7828  | 10960 | 10415 | 11660 | 10992 | 13513 | 12905 | 14222 | Rcn2    |
| Rcn3    | 4921  | 6226  | 6518  | 4636  | 2996  | 4107  | 2291  | 3940  | 6138  | 5265  | 7262  | 4070  | 5043  | 3873  | 4635  | 6331  | 5444  | 4909  | 3243  | 2935  | 2478  | 4328  | 7306  | 5351  | 4347  | 5340  | 4507  | 4033  | Rcn3    |
| Rcor1   | 5978  | 5516  | 6579  | 6993  | 6766  | 6599  | 6804  | 4811  | 5008  | 5526  | 5711  | 5552  | 5381  | 5501  | 5450  | 5927  | 6655  | 6785  | 6454  | 5020  | 6348  | 5152  | 4941  | 6127  | 5115  | 5671  | 4926  | 5342  | Rcor1   |
| Rcor2   | 6437  | 7705  | 10040 | 8624  | 8593  | 7824  | 7407  | 8101  | 8344  | 10648 | 8290  | 14659 | 10567 | 12134 | 6115  | 5892  | 10718 | 7896  | 10106 | 7261  | 7686  | 8791  | 6890  | 12995 | 11996 | 15579 | 12963 | 12912 | Rcor2   |
| Rcor3   | 573   | 473   | 344   | 459   | 579   | 632   | 564   | 1047  | 1036  | 785   | 922   | 855   | 887   | 827   | 607   | 514   | 392   | 387   | 520   | 656   | 526   | 804   | 924   | 628   | 832   | 601   | 938   | 741   | Rcor3   |
| Rcsd1   | 686   | 638   | 878   | 596   | 646   | 678   | 485   | 937   | 1051  | 1094  | 1540  | 1007  | 1143  | 899   | 682   | 829   | 658   | 727   | 544   | 547   | 534   | 1001  | 1554  | 1112  | 923   | 1133  | 952   | 871   | Rcsd1   |
| Rcvrn   | 3     | 2     | 0     | 0     | 9     | 1     | 10    | 1     | 3     | 10    | 2     | 0     | 0     | 3     | 3     | 3     | 2     | 1     | 2     | 1     | 9     | 5     | 1     | 2     | 12    | 0     | 3     | 0     | Rcvrn   |
| Rd3     | 0     | 0     | 0     | 0     | 11    | 0     | 0     | 4     | 2     | 48    | 9     | 1     | 3     | 1     | 5     | 2     | 0     | 1     | 2     | 0     | 1     | 3     | 4     | 5     | 1     | 5     | 2     | 0     | Rd3     |
| Rd3l    | 2     | 0     | 0     | 0     | 0     | 0     | 0     | 0     | 0     | 1     | 2     | 0     | 0     | 0     | 0     | 0     | 0     | 0     | 0     | 0     | 0     | 0     | 1     | 0     | 0     | 0     | 0     | 0     | Rd3l    |
| Rdh1    | 6     | 10    | 21    | 14    | 24    | 21    | 18    | 7     | 7     | 19    | 16    | 11    | 5     | 21    | 5     | 11    | 22    | 14    | 21    | 3     | 23    | 20    | 10    | 20    | 14    | 8     | 10    | 20    | Rdh1    |
| Rdh10   | 2042  | 1560  | 1825  | 1862  | 1988  | 1746  | 1886  | 1790  | 1949  | 1764  | 2264  | 1612  | 1878  | 1629  | 1861  | 1842  | 1725  | 2094  | 1769  | 1883  | 1857  | 2044  | 2179  | 1785  | 1763  | 1802  | 1576  | 1548  | Rdh10   |
| Rdh11   | 4910  | 4755  | 4390  | 3797  | 3980  | 4143  | 4403  | 3413  | 3143  | 2715  | 2712  | 2998  | 3158  | 3028  | 4809  | 4675  | 3890  | 4209  | 4222  | 4747  | 4350  | 2811  | 3193  | 2929  | 2804  | 3115  | 3077  | 3417  | Rdh11   |
| Rdh12   | 181   | 128   | 124   | 124   | 105   | 108   | 86    | 72    | 105   | 85    | 85    | 99    | 81    | 114   | 166   | 157   | 172   | 139   | 131   | 113   | 77    | 103   | 92    | 68    | 88    | 70    | 70    | Rdh12 |         |
| Rdh13   | 3377  | 3711  | 3250  | 3166  | 2934  | 2797  | 3169  | 2650  | 2385  | 2368  | 2171  | 2337  | 2391  | 2402  | 3218  | 3157  | 3233  | 2870  | 3218  | 3143  | 3109  | 2379  | 2379  | 2257  | 2574  | 2527  | 2566  | 2441  | Rdh13   |
| Rdh14   | 595   | 419   | 458   | 435   | 574   | 554   | 646   | 1084  | 1171  | 862   | 1029  | 921   | 899   | 984   | 564   | 513   | 518   | 489   | 556   | 527   | 559   | 1105  | 1190  | 1060  | 918   | 1033  | 850   | 1011  | Rdh14   |
| Rdh16   | 2     | 3     | 4     | 8     | 6     | 1     | 4     | 1     | 2     | 1     | 0     | 0     | 1     | 0     | 5     | 2     | 6     | 2     | 2     | 9     | 3     | 0     | 1     | 0     | 1     | 3     | 0     | 0     | Rdh16   |
| Rdh16f2 | 1     | 2     | 1     | 1     | 1     | 0     | 2     | 0     | 0     | 1     | 0     | 0     | 0     | 0     | 0     | 5     | 0     | 2     | 0     | 2     | 3     | 0     | 1     | 0     | 0     | 0     | 0     | 0     | Rdh16f2 |
| Rdh19   | 0     | 1     | 0     | 0     | 0     | 0     | 0     | 0     | 0     | 0     | 1     | 0     | 0     | 0     | 0     | 1     | 0     | 0     | 0     | 0     | 1     | 0     | 0     | 0     | 0     | 0     | 0     | 0     | Rdh19   |
| Rdh5    | 204   | 269   | 218   | 215   | 214   | 208   | 189   | 206   | 241   | 271   | 237   | 272   | 242   | 287   | 203   | 242   | 270   | 263   | 292   | 195   | 174   | 286   | 271   | 241   | 262   | 180   | 294   | 258   | Rdh5    |
| Rdh7    | 0     | 0     | 0     | 0     | 0     | 0     | 0     | 0     | 1     | 0     | 0     | 0     | 0     | 0     | 0     | 0     | 0     | 0     | 0     | 0     | 0     | 0     | 0     | 1     | 0     | 0     | 0     | 0     | Rdh7    |
| Rdh9    | 0     | 2     | 0     | 7     | 1     | 2     | 2     | 0     | 2     | 0     | 2     | 2     | 1     | 3     | 5     | 4     | 0     | 3     | 0     | 0     | 0     | 7     | 2     | 2     | 0     | 4     | 0     | 2     | Rdh9    |
| Rdm1    | 850   | 989   | 863   | 877   | 738   | 895   | 965   | 1082  | 1109  | 936   | 964   | 1307  | 1055  | 1331  | 832   | 769   | 936   | 727   | 1023  | 983   | 911   | 812   | 1062  | 1209  | 1162  | 1429  | 1327  | 1283  | Rdm1    |
| Rdx     | 26889 | 21771 | 25457 | 19570 | 19703 | 21806 | 21579 | 27667 | 24199 | 22079 | 22946 | 27147 | 26037 | 27457 | 27174 | 23929 | 22955 | 19513 | 20457 | 24715 | 20900 | 22546 | 24477 | 24201 | 23835 | 26832 | 29650 | 28078 | Rdx     |
| Rec14   | 32    | 52    | 51    | 54    | 34    | 22    | 49    | 18    | 24    | 35    | 27    | 22    | 44    | 42    | 34    | 28    | 53    | 37    | 51    | 28    | 28    | 10    | 19    | 15    | 20    | 35    | 37    | 66    | Rec14   |
| Rec8    | 700   | 936   | 854   | 1018  | 1076  | 966   | 780   | 793   | 642   | 965   | 903   | 685   | 864   | 639   | 948   | 1083  | 979   | 835   | 873   | 863   | 1034  | 1105  | 784   | 666   | 821   | 805   | 650   | 749   | Rec8    |
| Reck    | 4357  | 3959  | 3552  | 3146  | 2743  | 3848  | 2674  | 2768  | 3651  | 3091  | 4275  | 2980  | 3598  | 2922  | 4101  | 5184  | 3263  | 3759  | 2499  | 2587  | 2582  | 3023  | 4254  | 2951  | 2819  | 3010  | 3099  | 2822  | Reck    |
| Recql   | 5091  | 5217  | 4652  | 4729  | 4084  | 4088  | 4909  | 3709  | 3332  | 3144  | 3099  | 3774  | 3358  | 3961  | 4899  | 5042  | 4424  | 4604  | 4229  | 4673  | 4738  | 3110  | 3287  | 3406  | 3547  | 3622  | 4069  | 3961  | Recql   |
| Recql4  | 1653  | 2113  | 1972  | 1708  | 1033  | 1188  | 1258  | 854   | 1063  | 1041  | 944   | 1447  | 1192  | 1302  | 1328  | 1698  | 1593  | 1460  | 1444  | 1275  | 1250  | 668   | 867   | 1280  | 1018  | 1975  | 1432  | 1402  | Recql4  |
| Recql5  | 2985  | 3566  | 3472  | 3675  | 3072  | 3217  | 3309  | 2170  | 2567  | 2750  | 2419  | 3101  | 2821  | 2944  | 2810  | 3044  | 3459  | 3279  | 3518  | 3057  | 3254  | 2580  | 2264  | 2997  | 2906  | 2824  | 3118  | 2947  | Recql5  |
| Recp1   | 6653  | 7219  | 6956  | 9348  | 14250 | 11152 | 11094 | 14247 | 13026 | 14732 | 10843 | 10950 | 11030 | 8751  | 7011  | 8467  | 10740 | 11486 | 11251 | 11970 | 19006 | 12290 | 12026 | 16244 | 8150  | 9836  | 10275 | Recp1 |         |
| Recp2   | 1354  | 1856  | 1809  | 2578  | 3332  | 2534  | 2617  | 2033  | 2336  | 2917  | 2494  | 2573  | 2099  | 2497  | 1592  | 1456  | 2371  | 2716  | 3133  | 2360  | 2921  | 3240  | 2057  | 2596  | 3281  | 2099  | 2036  | 2071  | Recp2   |
| Recp3   | 6158  | 5583  | 6501  | 6145  | 6052  | 6326  | 6338  | 7675  | 6960  | 7589  | 7173  | 8244  | 7984  | 8508  | 6497  | 6386  | 6154  | 6048  | 5976  | 5445  | 6074  | 7461  | 7071  | 7633  | 7383  | 7798  | 7669  | 8444  | Recp3   |
| Recp4   | 1953  | 2477  | 2360  | 1916  | 1407  | 1438  | 1501  | 945   | 1254  | 934   | 1059  | 1372  | 1347  | 1177  | 1693  | 2441  | 2041  | 1994  | 1562  | 1592  | 1388  | 979   | 1218  | 1218  | 938   | 1716  | 1317  | 1304  | Recp4   |
| Recp5   | 7961  | 7784  | 8522  | 8095  | 12389 | 10201 | 9886  | 9785  | 9738  | 10523 | 10809 | 7261  | 8658  | 7296  | 8818  | 8576  | 8031  | 9987  | 9298  | 9975  | 9792  | 11946 | 10336 | 8610  | 10112 | 6698  | 7594  | 7135  | Recp5   |
| Recp6   | 1065  | 1598  | 1286  | 1386  | 796   | 881   | 622   | 153   | 199   | 197   | 158   | 150   | 152   | 121   | 1001  | 1436  | 1290  | 1306  | 938   | 815   | 725   | 117   | 184   | 212   | 120   | 192   | 167   | 171   | Recp6   |
| Reg1    | 0     | 0     | 0     | 0     | 0     | 0     | 0     | 0     | 1     | 0     | 0     | 0     | 0     | 0     | 0     | 0     | 0     | 0     | 0     | 0     | 0     | 0     | 0     | 0     | 0     | 0     | 0     | 0     | Reg1    |
| Reg3a   | 0     | 0     | 0     | 0     | 1     | 0     | 0     | 0     | 1     | 0     | 0     | 0     | 0     | 0     | 0     | 0     | 0     | 0     | 0     | 0     | 0     | 0     | 0     | 0     | 0     | 0     | 0     | 0     | Reg3a   |
| Reg3b   | 0     | 0     | 0     | 2     | 0     | 1     | 0     | 0     | 1     | 1     | 0     | 1     | 1     | 0     | 0     | 0     | 0     | 0     | 4     | 0     | 1     | 2     | 1     | 0     | 3     | 1     | 2     | 0     | Reg3b   |
| Reg3d   | 0     | 0     | 0     | 0     | 0     | 0     | 0     | 0     | 0     | 0     | 0     | 0     | 0     | 0     | 0     | 0     | 0     | 0     | 0     | 0     | 0     | 0     | 0     | 0     | 0     | 1     | 0     | 0     | Reg3d   |
| Reg3g   | 0     | 0     | 0     | 0     | 0     | 0     | 0     | 26    | 14    | 43    | 6     | 0     | 0     | 0     | 0     | 0     | 0     | 0     | 0     | 0     | 0     | 0     | 25    | 21    | 0     | 3     | 0     | 0     | Reg3g   |
| Reg4    | 2     | 0     | 0     | 2     | 0     | 0     | 0     | 1     | 0     | 0     | 0     | 0     | 0     | 4     | 0     | 0     | 0     | 1     | 0     | 0     | 0     | 2     | 0     | 0     | 0     | 0     | 0     | 0     | Reg4    |
| Rel     | 807   | 745   | 568   | 771   | 614   | 756   | 700   | 338   | 297   | 300   | 402   | 216   | 316   | 239   | 742   | 818   | 636   | 811   | 591   | 598   | 652   | 282   | 375   | 279   | 274   | 197   | 234   | 247   | Rel     |
| Rela    | 1307  | 1635  | 1497  | 1621  | 1742  | 1608  | 1332  | 1885  | 2392  | 2426  | 2359  | 2443  | 2288  | 2110  | 1191  | 1556  | 1572  | 1688  | 1687  | 1253  | 1493  | 2234  | 2455  | 2506  | 2399  | 3046  | 2048  | 2331  | Rela    |
| Relb    | 204   | 260   | 265   | 213   | 177   | 199   | 150   | 181   | 217   | 197   | 252   | 157   | 222   | 165   | 182   | 258   | 234   | 239   | 136   | 164   | 171   | 234   | 270   | 186   | 180   | 175   | 158   | 195   | Relb    |
| Relch   | 8395  | 7292  | 5941  | 8175  | 7850  | 8343  | 8719  | 6729  | 5829  | 5018  | 5034  | 5441  | 5229  | 5177  | 9297  | 7742  | 6455  | 7948  | 7406  | 8716  | 8659  | 6413  | 5708  | 4698  | 5610  | 3869  | 5026  | 4932  | Relch   |
| Rel1    | 3785  | 3194  | 3891  | 3364  | 3009  | 2986  | 3371  | 1379  | 1400  | 1378  | 1372  | 1491  | 1420  | 1561  | 3537  | 3605  | 3342  | 3422  | 3172  | 3049  | 3232  | 1161  | 1416  | 1577  | 1206  | 1886  | 1425  | 1495  | Rel1    |
| Rel2    | 843   | 1227  | 1205  | 1654  | 2365  | 1576  | 1724  | 752   | 1008  | 1233  | 1082  | 701   | 729   | 641   | 864   | 896   | 1612  | 1802  | 1852  | 1538  | 1801  | 1245  | 911   | 954   | 1171  | 591   | 560   | 517   | Rel2    |
| Reln    | 8389  | 9115  | 3504  | 12472 | 16397 | 18221 | 19980 | 11731 | 13930 | 12273 | 11441 | 11649 | 7496  | 12072 | 8631  | 6305  | 6968  | 13761 | 16797 | 18515 | 21988 | 10373 | 1138  |       |       |       |       |       |         |

|        |       |      |       |       |       |       |       |       |       |       |       |       |       |       |       |      |       |       |       |       |       |       |      |       |       |       |       |       |        |
|--------|-------|------|-------|-------|-------|-------|-------|-------|-------|-------|-------|-------|-------|-------|-------|------|-------|-------|-------|-------|-------|-------|------|-------|-------|-------|-------|-------|--------|
| Rexo1  | 3420  | 4668 | 5392  | 5078  | 5005  | 4479  | 3769  | 3816  | 4601  | 5585  | 4931  | 6473  | 4947  | 4964  | 3343  | 3911 | 5430  | 4692  | 5311  | 3562  | 4005  | 5417  | 4372 | 5938  | 5509  | 6378  | 5145  | 4841  | Rexo1  |
| Rexo2  | 2359  | 2006 | 2393  | 2359  | 2472  | 2115  | 2518  | 2160  | 2085  | 2164  | 2292  | 2093  | 2141  | 2297  | 2285  | 2089 | 2284  | 2334  | 2476  | 2340  | 2458  | 2087  | 2055 | 2285  | 2261  | 2295  | 2216  | 2427  | Rexo2  |
| Rexo4  | 2978  | 3139 | 2845  | 2943  | 2873  | 2870  | 2696  | 3551  | 3487  | 3492  | 3479  | 3433  | 3486  | 3408  | 2763  | 3054 | 2866  | 3093  | 2869  | 2964  | 2723  | 3182  | 3651 | 3508  | 3404  | 3473  | 3402  | 3344  | Rexo4  |
| Rexo5  | 2040  | 1559 | 1323  | 1218  | 1217  | 1420  | 1340  | 1417  | 1266  | 1095  | 1307  | 1315  | 1305  | 1437  | 1812  | 1775 | 1442  | 1223  | 1150  | 1394  | 1377  | 978   | 1328 | 998   | 991   | 1114  | 1382  | 1258  | Rexo5  |
| Rfc1   | 8868  | 8020 | 7606  | 6358  | 5189  | 6201  | 6139  | 7514  | 7654  | 6129  | 7805  | 7753  | 7475  | 7995  | 8227  | 8157 | 6487  | 6123  | 5715  | 6988  | 5597  | 5217  | 7249 | 6956  | 6023  | 8474  | 8458  | 8167  | Rfc1   |
| Rfc2   | 5585  | 6314 | 6237  | 5372  | 4907  | 5053  | 5226  | 4971  | 5441  | 5328  | 5081  | 6263  | 5691  | 5955  | 4977  | 5534 | 6166  | 5131  | 5834  | 5491  | 5217  | 4401  | 5155 | 5869  | 5599  | 7465  | 6527  | 6407  | Rfc2   |
| Rfc3   | 3162  | 3176 | 3179  | 2551  | 2528  | 2542  | 2963  | 3489  | 3444  | 2813  | 2635  | 3909  | 3225  | 3856  | 3134  | 2631 | 2788  | 2347  | 2894  | 3131  | 2628  | 2764  | 3018 | 3376  | 3032  | 4837  | 4194  | 4037  | Rfc3   |
| Rfc4   | 4149  | 3549 | 3873  | 3087  | 2167  | 2765  | 3205  | 3342  | 2745  | 2372  | 2130  | 3532  | 2975  | 3681  | 4026  | 3457 | 3175  | 2513  | 2856  | 3394  | 2877  | 1977  | 2564 | 2907  | 2642  | 4511  | 3858  | 4119  | Rfc4   |
| Rfc5   | 2344  | 2217 | 2309  | 1846  | 1716  | 1900  | 2149  | 2464  | 2726  | 2623  | 2397  | 3549  | 2862  | 3297  | 1995  | 1901 | 2257  | 1826  | 2109  | 1921  | 1910  | 2020  | 2495 | 3000  | 2549  | 4213  | 3595  | 3820  | Rfc5   |
| Rfesd  | 1065  | 760  | 688   | 806   | 704   | 791   | 935   | 933   | 1044  | 802   | 844   | 967   | 976   | 990   | 1054  | 912  | 740   | 703   | 777   | 973   | 887   | 784   | 1068 | 851   | 865   | 870   | 1149  | 1164  | Rfesd  |
| Rfl    | 2893  | 2843 | 2413  | 2685  | 2095  | 1974  | 2683  | 1241  | 1268  | 1211  | 1110  | 1387  | 1036  | 1579  | 2653  | 2463 | 2415  | 2451  | 2358  | 2253  | 2467  | 1019  | 1046 | 1423  | 1129  | 1767  | 1221  | 1301  | Rfl    |
| Rfk    | 6171  | 5364 | 5931  | 5880  | 5026  | 4967  | 5951  | 3727  | 3338  | 3432  | 3516  | 3707  | 4042  | 4101  | 6291  | 5997 | 5750  | 5172  | 4945  | 5071  | 5218  | 3212  | 3555 | 3754  | 3534  | 4831  | 3698  | 4405  | Rfk    |
| Rflna  | 347   | 503  | 396   | 381   | 321   | 303   | 146   | 375   | 821   | 731   | 1049  | 302   | 490   | 301   | 434   | 632  | 348   | 418   | 224   | 151   | 197   | 633   | 706  | 477   | 367   | 513   | 314   | 313   | Rflna  |
| Rflnb  | 2773  | 2379 | 3599  | 2374  | 2032  | 2046  | 1728  | 1585  | 2065  | 1874  | 2648  | 1542  | 1825  | 1327  | 2509  | 3523 | 2697  | 2348  | 1968  | 1561  | 1524  | 1338  | 2207 | 1948  | 1119  | 1875  | 1338  | 1604  | Rflnb  |
| Rfng   | 1956  | 2626 | 2636  | 3168  | 3416  | 2656  | 2532  | 2350  | 2845  | 3303  | 3040  | 3125  | 2694  | 2845  | 1791  | 2377 | 3065  | 3208  | 3241  | 2365  | 2759  | 3561  | 2728 | 3338  | 3217  | 3018  | 2513  | 2476  | Rfng   |
| Rfpl4  | 0     | 0    | 0     | 0     | 0     | 0     | 0     | 0     | 0     | 0     | 0     | 0     | 0     | 0     | 0     | 0    | 0     | 0     | 0     | 0     | 0     | 0     | 0    | 0     | 1     | 0     | 0     | 0     | Rfpl4  |
| Rfpl4b | 0     | 2    | 0     | 0     | 2     | 4     | 0     | 0     | 1     | 0     | 3     | 0     | 0     | 0     | 2     | 3    | 0     | 0     | 0     | 0     | 0     | 0     | 0    | 0     | 0     | 1     | 1     | 1     | Rfpl4b |
| Rft1   | 644   | 529  | 620   | 481   | 515   | 592   | 483   | 948   | 1129  | 989   | 1100  | 1100  | 1226  | 1006  | 591   | 550  | 552   | 513   | 524   | 542   | 497   | 916   | 1102 | 1064  | 923   | 1257  | 1113  | 1042  | Rft1   |
| Rftn1  | 459   | 568  | 561   | 559   | 781   | 640   | 757   | 537   | 831   | 824   | 790   | 747   | 421   | 689   | 456   | 495  | 699   | 677   | 713   | 601   | 635   | 777   | 768  | 785   | 868   | 810   | 549   | 529   | Rftn1  |
| Rftn2  | 1310  | 1085 | 1012  | 984   | 1002  | 1188  | 977   | 1606  | 1763  | 1713  | 1698  | 1265  | 1349  | 1298  | 1139  | 1192 | 1088  | 1020  | 1128  | 1102  | 1076  | 1432  | 1762 | 1703  | 1345  | 1612  | 1203  | 1220  | Rftn2  |
| Rfwd3  | 10154 | 9538 | 10212 | 8464  | 7614  | 8157  | 9163  | 8365  | 7853  | 7521  | 7124  | 9670  | 9017  | 10195 | 9869  | 9139 | 9251  | 8501  | 8341  | 8364  | 8647  | 6889  | 7167 | 8058  | 7956  | 11269 | 10104 | 10673 | Rfwd3  |
| Rfx1   | 1355  | 1694 | 1795  | 1981  | 2160  | 1778  | 1724  | 2077  | 2492  | 2932  | 2632  | 3049  | 2624  | 2621  | 1233  | 1431 | 2021  | 1902  | 2348  | 1716  | 1852  | 3182  | 2370 | 2957  | 2814  | 2688  | 2586  | 2533  | Rfx1   |
| Rfx2   | 1423  | 1994 | 2046  | 1788  | 1376  | 1395  | 1306  | 515   | 590   | 588   | 522   | 766   | 770   | 652   | 1358  | 1816 | 1924  | 1710  | 1588  | 1297  | 1380  | 610   | 671  | 643   | 636   | 876   | 658   | 679   | Rfx2   |
| Rfx3   | 4481  | 3721 | 3999  | 5071  | 4863  | 5323  | 5451  | 7618  | 6507  | 6597  | 5890  | 7449  | 6683  | 7756  | 4555  | 3709 | 4633  | 4545  | 5062  | 4933  | 5480  | 7209  | 6121 | 6623  | 7678  | 5409  | 7315  | 7316  | Rfx3   |
| Rfx4   | 1493  | 1837 | 2979  | 1653  | 1794  | 1822  | 1195  | 2881  | 2082  | 2577  | 2006  | 3957  | 4840  | 3716  | 2115  | 1924 | 2620  | 1443  | 1746  | 1521  | 1397  | 3065  | 2223 | 2594  | 2607  | 2792  | 4774  | 4685  | Rfx4   |
| Rfx5   | 2263  | 2150 | 2192  | 2355  | 2650  | 2540  | 2607  | 2455  | 2564  | 2451  | 2461  | 2217  | 2252  | 2265  | 2113  | 1970 | 2376  | 2423  | 2707  | 2343  | 2665  | 2496  | 2515 | 2633  | 2280  | 2090  | 2009  | 2185  | Rfx5   |
| Rfx6   | 0     | 1    | 0     | 0     | 0     | 0     | 0     | 1     | 0     | 0     | 6     | 0     | 0     | 0     | 0     | 0    | 0     | 0     | 0     | 0     | 0     | 0     | 1    | 0     | 0     | 0     | 0     | 0     | Rfx6   |
| Rfx7   | 10933 | 9093 | 8712  | 10655 | 11299 | 11899 | 12474 | 12612 | 10561 | 10723 | 10073 | 12530 | 11504 | 12353 | 10671 | 9401 | 9580  | 10441 | 11223 | 11278 | 12364 | 12101 | 9482 | 10003 | 12101 | 8828  | 11472 | 11744 | Rfx7   |
| Rfx8   | 13    | 14   | 13    | 2     | 2     | 3     | 3     | 22    | 86    | 5     | 100   | 20    | 39    | 13    | 20    | 7    | 17    | 14    | 3     | 10    | 4     | 42    | 54   | 8     | 10    | 27    | 31    | 28    | Rfx8   |
| Rfxank | 1407  | 1821 | 2011  | 1872  | 1709  | 1660  | 1561  | 1197  | 1329  | 1465  | 1455  | 1614  | 1514  | 1337  | 1211  | 1537 | 1951  | 1810  | 1907  | 1458  | 1702  | 1325  | 1311 | 1579  | 1436  | 1749  | 1342  | 1423  | Rfxank |
| Rfxap  | 2083  | 2334 | 2339  | 2305  | 2219  | 2046  | 2263  | 1529  | 1370  | 1538  | 1524  | 1560  | 1418  | 1677  | 2090  | 2196 | 2326  | 2560  | 2159  | 2055  | 2239  | 1663  | 1458 | 1617  | 1657  | 1761  | 1367  | 1576  | Rfxap  |
| Rgcc   | 401   | 541  | 313   | 416   | 528   | 365   | 513   | 642   | 639   | 568   | 779   | 609   | 442   | 678   | 487   | 428  | 462   | 526   | 394   | 419   | 424   | 500   | 464  | 708   | 662   | 976   | 452   | 485   | Rgcc   |
| Rgl1   | 3796  | 3832 | 3762  | 4212  | 3953  | 3625  | 3724  | 2235  | 2607  | 2630  | 2865  | 2384  | 2741  | 2282  | 3848  | 4044 | 3881  | 4324  | 3832  | 3249  | 3812  | 2744  | 2979 | 2533  | 2471  | 2995  | 2413  | 2608  | Rgl1   |
| Rgl2   | 4674  | 5904 | 6748  | 6781  | 6802  | 5840  | 5844  | 4573  | 5193  | 5949  | 5478  | 6244  | 5714  | 5910  | 4609  | 5207 | 7325  | 6302  | 7167  | 5362  | 6037  | 5538  | 4832 | 6388  | 5917  | 6373  | 5956  | 5846  | Rgl2   |
| Rgl3   | 630   | 860  | 1097  | 833   | 663   | 662   | 598   | 111   | 103   | 137   | 180   | 202   | 201   | 140   | 679   | 856  | 1071  | 804   | 692   | 554   | 614   | 179   | 154  | 181   | 171   | 221   | 173   | 198   | Rgl3   |
| Rgma   | 3302  | 4842 | 6283  | 6026  | 6590  | 5348  | 4422  | 5159  | 5773  | 7560  | 6706  | 8357  | 7279  | 6741  | 3533  | 3751 | 6660  | 5657  | 6791  | 4033  | 5071  | 7869  | 5521 | 7453  | 7520  | 6475  | 6952  | 6647  | Rgma   |
| Rgmb   | 6276  | 7123 | 9501  | 12995 | 14142 | 11826 | 12034 | 11020 | 9323  | 12769 | 11654 | 12218 | 14049 | 11626 | 7675  | 7186 | 11770 | 13592 | 12654 | 9620  | 12499 | 17771 | 9635 | 11399 | 13240 | 11661 | 11698 | 12740 | Rgmb   |
| Rgn    | 18    | 9    | 14    | 1     | 2     | 4     | 9     | 11    | 19    | 7     | 5     | 11    | 11    | 23    | 21    | 7    | 9     | 4     | 11    | 7     | 8     | 5     | 15   | 16    | 11    | 18    | 15    | 14    | Rgn    |
| Rgp1   | 6377  | 7451 | 8281  | 7394  | 6533  | 6525  | 6490  | 5003  | 5863  | 6636  | 6673  | 7479  | 6939  | 7078  | 6113  | 6988 | 7975  | 7201  | 6830  | 5329  | 6210  | 6335  | 5916 | 7044  | 6771  | 7056  | 6998  | 7334  | Rgp1   |
| Rgr    | 0     | 0    | 0     | 0     | 0     | 0     | 0     | 2     | 2     | 7     | 9     | 0     | 0     | 0     | 0     | 0    | 0     | 0     | 1     | 0     | 0     | 2     | 1    | 4     | 6     | 0     | 0     | 1     | Rgr    |
| Rgs10  | 0     | 0    | 0     | 3     | 2     | 0     | 0     | 2     | 4     | 0     | 0     | 2     | 5     | 0     | 2     | 0    | 0     | 1     | 1     | 0     | 0     | 2     | 4    | 5     | 3     | 2     | 1     | 4     | Rgs10  |
| Rgs11  | 654   | 693  | 627   | 683   | 835   | 534   | 824   | 475   | 434   | 415   | 491   | 257   | 294   | 271   | 630   | 621  | 679   | 691   | 666   | 725   | 802   | 643   | 504  | 356   | 370   | 286   | 315   | 295   | Rgs11  |
| Rgs12  | 422   | 260  | 213   | 347   | 444   | 348   | 163   | 335   | 400   | 507   | 476   | 88    | 193   | 112   | 314   | 404  | 260   | 379   | 284   | 198   | 216   | 297   | 422  | 454   | 169   | 321   | 77    | 81    | Rgs12  |
| Rgs13  | 5041  | 5522 | 6492  | 5903  | 6091  | 6130  | 5541  | 6964  | 8066  | 8616  | 7837  | 10948 | 9482  | 9773  | 4917  | 4961 | 6327  | 5702  | 6563  | 5010  | 5601  | 8442  | 7572 | 9476  | 9978  | 9412  | 10669 | 10116 | Rgs13  |
| Rgs14  | 52    | 46   | 89    | 60    | 51    | 85    | 111   | 198   | 56    | 72    | 65    | 138   | 104   | 212   | 99    | 38   | 67    | 69    | 82    | 118   | 100   | 142   | 121  | 138   | 124   | 188   | 246   | 263   | Rgs14  |
| Rgs15  | 25    | 22   | 16    | 8     | 7     | 38    | 11    | 16    | 30    | 38    | 50    | 10    | 17    | 14    | 11    | 19   | 5     | 13    | 9     | 6     | 17    | 25    | 26   | 13    | 19    | 24    | 9     | 18    | Rgs15  |
| Rgs16  | 2260  | 3316 | 3838  | 3916  | 3060  | 2968  | 3469  | 1757  | 1591  | 1824  | 1984  | 2760  | 1807  | 3057  | 2552  | 2301 | 3816  | 3725  | 3381  | 3169  | 3525  | 1873  | 1952 | 2589  | 2210  | 3178  | 3011  | 3398  | Rgs16  |
| Rgs17  | 1896  | 1469 | 1388  | 2014  | 2741  | 2624  | 2708  | 2105  | 1734  | 1545  | 1583  | 1351  | 1154  | 1401  | 2186  | 1596 | 1866  | 2218  | 2175  | 2638  | 2687  | 2232  | 1614 | 1244  | 1868  | 704   | 1133  | 1117  | Rgs17  |
| Rgs18  | 59    | 18   | 31    | 17    | 21    | 29    | 18    | 71    | 49    | 38    | 20    | 59    | 62    | 47    | 30    | 40   | 12    | 20    | 12    | 28    | 14    |       |      |       |       |       |       |       |        |

|         |       |       |       |       |       |       |       |       |       |       |       |       |       |       |       |       |       |       |       |       |       |       |       |       |       |       |       |       |         |
|---------|-------|-------|-------|-------|-------|-------|-------|-------|-------|-------|-------|-------|-------|-------|-------|-------|-------|-------|-------|-------|-------|-------|-------|-------|-------|-------|-------|-------|---------|
| Rho     | 75    | 120   | 102   | 121   | 160   | 102   | 102   | 88    | 109   | 106   | 109   | 83    | 87    | 65    | 87    | 119   | 97    | 143   | 109   | 124   | 134   | 137   | 83    | 92    | 65    | 72    | 80    | 59    | Rho     |
| Rhoa    | 21940 | 18006 | 20972 | 17942 | 15995 | 16323 | 18759 | 20235 | 18107 | 16985 | 18484 | 18680 | 18621 | 21212 | 21742 | 19086 | 18934 | 18357 | 17206 | 16306 | 18932 | 19231 | 19434 | 18970 | 17638 | 22991 | 19703 | 23188 | Rhoa    |
| Rhob    | 4430  | 5334  | 6444  | 6983  | 6356  | 5689  | 5328  | 5769  | 6171  | 7467  | 7704  | 6438  | 6692  | 6552  | 4592  | 5297  | 6835  | 6985  | 6336  | 4682  | 5449  | 7379  | 7001  | 7442  | 8076  | 7404  | 6214  | 6793  | Rhob    |
| Rhobtb1 | 587   | 574   | 877   | 605   | 753   | 713   | 607   | 1612  | 2017  | 2221  | 2510  | 2159  | 2236  | 2181  | 537   | 674   | 780   | 656   | 707   | 511   | 575   | 1943  | 2215  | 2102  | 1930  | 2333  | 2150  | 2284  | Rhobtb1 |
| Rhobtb2 | 4067  | 4947  | 5927  | 6534  | 6118  | 5329  | 5425  | 4064  | 3646  | 4829  | 4090  | 5099  | 3969  | 5187  | 3986  | 4418  | 6437  | 6415  | 6493  | 4669  | 5613  | 5396  | 3625  | 5194  | 5562  | 4911  | 4683  | 5114  | Rhobtb2 |
| Rhobtb3 | 10071 | 7005  | 8813  | 6590  | 6529  | 7424  | 7000  | 11302 | 9896  | 8975  | 10091 | 11811 | 10525 | 12182 | 9196  | 8082  | 7803  | 6396  | 6914  | 7582  | 6624  | 9160  | 9218  | 10117 | 9881  | 12081 | 12626 | 12617 | Rhobtb3 |
| Rhoc    | 4221  | 4756  | 4453  | 3133  | 2459  | 3076  | 2316  | 2637  | 3652  | 3020  | 3981  | 2555  | 3176  | 2639  | 3988  | 4981  | 3651  | 3288  | 2773  | 2928  | 2277  | 2366  | 4325  | 2952  | 2412  | 3704  | 3013  | 2916  | Rhoc    |
| Rhod    | 661   | 688   | 563   | 381   | 309   | 300   | 208   | 403   | 438   | 331   | 466   | 263   | 323   | 253   | 535   | 832   | 461   | 407   | 291   | 296   | 212   | 252   | 515   | 355   | 203   | 420   | 311   | 323   | Rhod    |
| Rhof    | 667   | 758   | 636   | 648   | 697   | 658   | 552   | 209   | 274   | 323   | 265   | 219   | 205   | 204   | 640   | 749   | 649   | 675   | 642   | 663   | 602   | 306   | 263   | 273   | 278   | 183   | 201   | 166   | Rhof    |
| Rhog    | 935   | 1144  | 993   | 749   | 758   | 740   | 700   | 685   | 869   | 799   | 905   | 827   | 834   | 750   | 886   | 1308  | 933   | 953   | 814   | 694   | 704   | 605   | 1017  | 717   | 662   | 946   | 815   | 839   | Rhog    |
| Rhoj    | 21    | 19    | 11    | 39    | 22    | 31    | 27    | 26    | 40    | 5     | 53    | 20    | 18    | 19    | 22    | 21    | 21    | 25    | 21    | 22    | 30    | 22    | 56    | 20    | 18    | 22    | 27    | 7     | Rhoj    |
| Rhoj    | 649   | 701   | 772   | 530   | 609   | 632   | 514   | 1420  | 1760  | 1459  | 2710  | 1357  | 1783  | 1185  | 728   | 822   | 581   | 577   | 580   | 596   | 510   | 1684  | 2210  | 1438  | 1304  | 1515  | 1313  | 1232  | Rhoj    |
| Rhoq    | 7040  | 4987  | 6629  | 4862  | 4380  | 4590  | 4450  | 4554  | 4541  | 4423  | 6262  | 3897  | 4746  | 4168  | 6012  | 6340  | 5449  | 4789  | 4296  | 3871  | 4291  | 4739  | 5606  | 4340  | 3635  | 4795  | 4307  | 4691  | Rhoq    |
| Rhot1   | 7732  | 7052  | 6791  | 6965  | 6551  | 7171  | 7626  | 6981  | 5938  | 5827  | 5659  | 5820  | 5495  | 6033  | 7936  | 7179  | 6431  | 7203  | 6785  | 7618  | 7371  | 6333  | 6018  | 5816  | 6097  | 5976  | 5886  | 6090  | Rhot1   |
| Rhot2   | 1811  | 2023  | 2297  | 2335  | 1677  | 1646  | 1935  | 1115  | 1096  | 1504  | 1282  | 1578  | 1236  | 1700  | 1486  | 1755  | 2321  | 2137  | 1810  | 1494  | 1949  | 1293  | 1125  | 1682  | 1360  | 1657  | 1453  | 1613  | Rhot2   |
| Rhou    | 1983  | 1565  | 2461  | 1885  | 2898  | 2339  | 2215  | 3087  | 3004  | 3492  | 3442  | 3086  | 3402  | 3174  | 1998  | 2000  | 2270  | 2073  | 2385  | 1737  | 2193  | 4047  | 3018  | 3362  | 3668  | 3221  | 3101  | 3443  | Rhou    |
| Rhov    | 142   | 174   | 107   | 178   | 328   | 246   | 225   | 217   | 302   | 323   | 276   | 166   | 125   | 160   | 121   | 151   | 162   | 183   | 286   | 231   | 243   | 249   | 313   | 244   | 237   | 119   | 124   | 131   | Rhov    |
| Rhov    | 0     | 0     | 0     | 0     | 0     | 0     | 0     | 0     | 0     | 0     | 0     | 0     | 0     | 0     | 0     | 0     | 2     | 0     | 0     | 0     | 0     | 0     | 0     | 0     | 0     | 0     | 0     | 0     | Rhov    |
| Rhov12  | 0     | 0     | 0     | 3     | 0     | 5     | 0     | 0     | 1     | 0     | 0     | 0     | 0     | 0     | 0     | 2     | 0     | 0     | 1     | 0     | 0     | 0     | 2     | 0     | 0     | 0     | 0     | 0     | Rhov12  |
| Rhox2a  | 1     | 5     | 1     | 0     | 2     | 0     | 0     | 0     | 1     | 10    | 1     | 3     | 1     | 6     | 1     | 10    | 0     | 0     | 0     | 0     | 0     | 0     | 1     | 0     | 0     | 6     | 2     | 7     | Rhox2a  |
| Rhox2b  | 2     | 8     | 7     | 3     | 0     | 4     | 1     | 4     | 4     | 0     | 0     | 3     | 3     | 2     | 4     | 4     | 2     | 0     | 0     | 0     | 0     | 2     | 2     | 1     | 0     | 6     | 5     | 5     | Rhox2b  |
| Rhox2c  | 16    | 35    | 5     | 6     | 4     | 11    | 0     | 20    | 18    | 8     | 4     | 11    | 64    | 16    | 16    | 30    | 15    | 12    | 2     | 0     | 0     | 30    | 10    | 2     | 21    | 15    | 45    | 37    | Rhox2c  |
| Rhox2d  | 2     | 4     | 2     | 0     | 0     | 0     | 0     | 1     | 2     | 0     | 2     | 5     | 10    | 4     | 3     | 4     | 3     | 1     | 0     | 0     | 0     | 5     | 1     | 0     | 0     | 11    | 5     | 5     | Rhox2d  |
| Rhox2e  | 0     | 1     | 0     | 0     | 0     | 0     | 0     | 0     | 1     | 1     | 0     | 0     | 0     | 0     | 0     | 0     | 0     | 0     | 0     | 0     | 0     | 0     | 0     | 2     | 0     | 0     | 0     | 0     | Rhox2e  |
| Rhox2f  | 1     | 2     | 3     | 0     | 0     | 0     | 0     | 0     | 2     | 0     | 1     | 1     | 15    | 5     | 3     | 2     | 0     | 1     | 0     | 0     | 0     | 5     | 1     | 2     | 0     | 8     | 5     | 8     | Rhox2f  |
| Rhox2g  | 0     | 0     | 0     | 0     | 0     | 0     | 0     | 0     | 0     | 0     | 1     | 1     | 0     | 0     | 0     | 0     | 0     | 0     | 2     | 0     | 0     | 0     | 0     | 0     | 0     | 0     | 0     | 0     | Rhox2g  |
| Rhox2h  | 0     | 0     | 0     | 0     | 0     | 0     | 0     | 0     | 1     | 0     | 0     | 0     | 0     | 0     | 0     | 0     | 0     | 0     | 0     | 0     | 0     | 0     | 0     | 0     | 0     | 0     | 0     | 0     | Rhox2h  |
| Rhox3c  | 0     | 0     | 0     | 0     | 0     | 0     | 0     | 0     | 0     | 0     | 0     | 0     | 1     | 0     | 0     | 0     | 0     | 0     | 0     | 0     | 0     | 0     | 0     | 0     | 0     | 0     | 0     | 0     | Rhox3c  |
| Rhox3f  | 0     | 0     | 0     | 0     | 0     | 0     | 0     | 0     | 0     | 0     | 3     | 0     | 0     | 0     | 0     | 0     | 0     | 0     | 0     | 0     | 0     | 0     | 0     | 0     | 0     | 0     | 0     | 0     | Rhox3f  |
| Rhox3g  | 0     | 0     | 0     | 0     | 0     | 0     | 0     | 2     | 0     | 0     | 0     | 0     | 0     | 0     | 0     | 0     | 0     | 0     | 0     | 0     | 0     | 0     | 0     | 0     | 0     | 0     | 1     | 0     | Rhox3g  |
| Rhox4a  | 0     | 0     | 0     | 0     | 1     | 0     | 0     | 0     | 0     | 0     | 0     | 0     | 3     | 0     | 0     | 0     | 0     | 0     | 0     | 0     | 0     | 0     | 1     | 0     | 0     | 0     | 0     | 0     | Rhox4a  |
| Rhox4a2 | 1     | 1     | 0     | 0     | 0     | 0     | 0     | 1     | 2     | 0     | 0     | 0     | 1     | 0     | 1     | 4     | 0     | 0     | 0     | 0     | 0     | 0     | 1     | 0     | 0     | 0     | 0     | 0     | Rhox4a2 |
| Rhox4b  | 7     | 4     | 0     | 0     | 0     | 4     | 0     | 1     | 2     | 3     | 2     | 3     | 8     | 1     | 12    | 2     | 0     | 2     | 0     | 0     | 0     | 3     | 3     | 1     | 6     | 1     | 2     | 8     | Rhox4b  |
| Rhox4c  | 0     | 0     | 0     | 0     | 0     | 0     | 0     | 0     | 0     | 0     | 0     | 0     | 0     | 0     | 0     | 0     | 0     | 0     | 0     | 0     | 0     | 0     | 0     | 0     | 0     | 0     | 2     | 0     | Rhox4c  |
| Rhox4d  | 1     | 1     | 1     | 0     | 0     | 0     | 0     | 1     | 3     | 0     | 0     | 1     | 3     | 0     | 7     | 2     | 0     | 0     | 0     | 0     | 0     | 0     | 0     | 0     | 0     | 0     | 0     | 0     | Rhox4d  |
| Rhox4e  | 0     | 2     | 0     | 0     | 0     | 0     | 0     | 0     | 2     | 0     | 0     | 0     | 1     | 0     | 1     | 0     | 0     | 0     | 0     | 0     | 0     | 2     | 1     | 0     | 0     | 0     | 0     | 0     | Rhox4e  |
| Rhox4f  | 0     | 0     | 2     | 0     | 0     | 0     | 0     | 0     | 0     | 4     | 0     | 0     | 0     | 0     | 0     | 1     | 0     | 0     | 0     | 0     | 0     | 2     | 1     | 0     | 0     | 0     | 0     | 0     | Rhox4f  |
| Rhox4g  | 0     | 0     | 0     | 0     | 0     | 0     | 0     | 0     | 0     | 0     | 0     | 0     | 1     | 1     | 0     | 0     | 0     | 0     | 0     | 0     | 0     | 2     | 0     | 1     | 0     | 0     | 0     | 0     | Rhox4g  |
| Rhpn1   | 2323  | 3709  | 3460  | 3427  | 2506  | 2440  | 2341  | 927   | 989   | 1032  | 893   | 1173  | 1097  | 1069  | 2380  | 3048  | 3493  | 3121  | 2813  | 2648  | 2264  | 1115  | 1018  | 1147  | 987   | 1286  | 1159  | 1098  | Rhpn1   |
| Rhpn2   | 1764  | 1811  | 1775  | 1657  | 1487  | 1499  | 1467  | 266   | 283   | 291   | 292   | 163   | 238   | 182   | 1528  | 1850  | 1699  | 1559  | 1475  | 1330  | 1422  | 147   | 344   | 257   | 165   | 219   | 179   | 171   | Rhpn2   |
| Ribc1   | 208   | 230   | 255   | 209   | 153   | 150   | 234   | 131   | 112   | 138   | 119   | 144   | 138   | 205   | 237   | 167   | 255   | 136   | 198   | 192   | 160   | 104   | 107   | 191   | 106   | 234   | 148   | 171   | Ribc1   |
| Ribc2   | 149   | 185   | 125   | 131   | 92    | 106   | 142   | 24    | 29    | 41    | 54    | 59    | 78    | 39    | 182   | 196   | 143   | 157   | 100   | 143   | 155   | 27    | 63    | 44    | 36    | 29    | 41    | 56    | Ribc2   |
| Ric1    | 11911 | 9572  | 7452  | 9540  | 9737  | 10790 | 10296 | 7867  | 7514  | 5997  | 7409  | 5767  | 6659  | 5716  | 10498 | 11062 | 8029  | 10258 | 9139  | 9539  | 10805 | 6458  | 7307  | 5604  | 6255  | 4562  | 5705  | 5720  | Ric1    |
| Ric3    | 4242  | 3844  | 3523  | 4079  | 3832  | 4206  | 4697  | 3761  | 3054  | 3473  | 3875  | 3266  | 3978  | 4547  | 3396  | 3978  | 3810  | 4218  | 4278  | 4757  | 4012  | 2967  | 3558  | 3588  | 2935  | 3866  | 3686  | Ric3  |         |
| Ric8a   | 4270  | 5333  | 3840  | 4665  | 4563  | 4581  | 4200  | 3938  | 4431  | 3870  | 3811  | 4121  | 4061  | 3773  | 4466  | 4625  | 4202  | 4292  | 4606  | 4387  | 4434  | 4278  | 4310  | 4001  | 4016  | 3709  | 3987  | 3719  | Ric8a   |
| Ric8b   | 4427  | 4586  | 4535  | 4449  | 4218  | 4122  | 4395  | 4673  | 4112  | 4175  | 4170  | 4041  | 3678  | 3954  | 4477  | 4443  | 4242  | 4215  | 4460  | 4541  | 4536  | 4639  | 4135  | 3798  | 4259  | 3722  | 3932  | 3896  | Ric8b   |
| Rictor  | 9393  | 8098  | 5174  | 7057  | 7606  | 8806  | 8789  | 10119 | 8549  | 7098  | 7755  | 7783  | 8140  | 8286  | 9506  | 8558  | 5460  | 7032  | 6798  | 9134  | 8690  | 7217  | 8404  | 6057  | 7928  | 4755  | 8535  | 7425  | Rictor  |
| Rida    | 972   | 764   | 1162  | 933   | 701   | 706   | 815   | 846   | 742   | 777   | 803   | 955   | 1001  | 979   | 931   | 953   | 973   | 737   | 740   | 1027  | 761   | 675   | 812   | 1008  | 771   | 1239  | 1054  | 1093  | Rida    |
| Rif1    | 14634 | 11258 | 8550  | 10569 | 10356 | 12618 | 12511 | 14035 | 11543 | 9340  | 9508  | 11652 | 11510 | 12347 | 14227 | 12987 | 9177  | 10329 | 10601 | 14475 | 12543 | 8173  | 10795 | 8934  | 9817  | 8225  | 13316 | 11248 | Rif1    |
| Riiaad1 | 413   | 455   | 501   | 633   | 533   | 506   | 706   | 304   | 214   | 258   | 234   | 282   | 319   | 339   | 469   | 400   | 560   | 579   | 476   | 482   | 618   | 262   | 194   | 289   | 224   | 286   | 306   | 293   | Riiaad1 |
| Riip    | 42    | 49    | 40    | 84    | 82    | 76    | 60    | 76    | 66    | 60    | 66    | 74    | 67    | 56    | 22    | 65    | 64    | 76    | 55    | 43    | 64    | 97    | 80    | 60    | 59    | 50    | 63    | 64    | Riip    |
| Riip1   | 2174  | 2678  | 2809  | 2487  | 2112  | 1950  | 1907  | 890   | 1067  | 1017  | 1324  | 1060  | 1058  | 1080  | 2099  | 2519  | 2719  | 2176  | 2349  | 1985  | 1943  | 899   | 1100  | 1155  | 1018  | 1392  | 1029  | 1108  | Riip1   |
| Riip2   | 1696  | 1939  | 1647  | 1736  | 1311  | 1278  | 1427  | 673   | 790   | 608   | 693   | 627   | 621   | 587   | 1549  | 1766  | 1662  | 1611  | 1501  | 1485  | 1360  | 570   | 818   | 662   | 593   | 810   | 642   | 718   | Riip2   |
| Rimbp2  | 426   |       |       |       |       |       |       |       |       |       |       |       |       |       |       |       |       |       |       |       |       |       |       |       |       |       |       |       |         |



|          |       |       |       |       |       |       |       |       |       |       |       |       |       |       |       |       |       |       |       |       |       |       |       |       |       |       |       |       |          |         |
|----------|-------|-------|-------|-------|-------|-------|-------|-------|-------|-------|-------|-------|-------|-------|-------|-------|-------|-------|-------|-------|-------|-------|-------|-------|-------|-------|-------|-------|----------|---------|
| Ripply1  | 15    | 10    | 12    | 6     | 6     | 6     | 4     | 17    | 12    | 8     | 58    | 38    | 37    | 26    | 7     | 7     | 7     | 2     | 4     | 12    | 4     | 17    | 49    | 19    | 17    | 8     | 57    | 28    | Ripply1  |         |
| Ripply2  | 7     | 10    | 14    | 17    | 21    | 11    | 16    | 22    | 33    | 31    | 22    | 31    | 8     | 24    | 11    | 8     | 12    | 10    | 16    | 19    | 13    | 38    | 31    | 23    | 35    | 8     | 24    | 15    | Ripply2  |         |
| Ripply3  | 220   | 141   | 247   | 142   | 85    | 121   | 96    | 98    | 102   | 92    | 66    | 98    | 154   | 135   | 150   | 153   | 183   | 147   | 147   | 139   | 99    | 104   | 118   | 92    | 89    | 182   | 157   | 135   | Ripply3  |         |
| Rit1     | 2679  | 3207  | 2706  | 3142  | 2876  | 2839  | 3066  | 1984  | 1912  | 1613  | 1785  | 1682  | 1841  | 1758  | 2835  | 2671  | 2954  | 3106  | 3292  | 3076  | 3260  | 1975  | 2055  | 1754  | 1737  | 1868  | 1991  | 1844  | Rit1     |         |
| Rit2     | 209   | 246   | 283   | 445   | 1046  | 702   | 915   | 670   | 593   | 644   | 656   | 352   | 330   | 397   | 347   | 230   | 352   | 684   | 764   | 785   | 935   | 1024  | 715   | 545   | 790   | 263   | 363   | 310   | Rit2     |         |
| Rita1    | 1551  | 2338  | 1588  | 2159  | 1679  | 1589  | 1627  | 739   | 749   | 773   | 666   | 686   | 689   | 551   | 1559  | 2003  | 1773  | 1995  | 1817  | 1817  | 1781  | 703   | 750   | 747   | 738   | 695   | 652   | 552   | Rita1    |         |
| Ribp1    | 257   | 291   | 110   | 454   | 759   | 720   | 948   | 1120  | 1406  | 1132  | 954   | 849   | 573   | 996   | 294   | 103   | 298   | 603   | 790   | 858   | 861   | 820   | 960   | 1219  | 1387  | 843   | 593   | 553   | Ribp1    |         |
| Rif      | 8975  | 7753  | 6018  | 7194  | 6864  | 7751  | 7568  | 9123  | 7516  | 7249  | 6649  | 6692  | 6688  | 6871  | 9108  | 7957  | 6585  | 6710  | 6685  | 8424  | 7025  | 6928  | 7746  | 6034  | 6432  | 5120  | 6527  | 6319  | Rif      |         |
| Rlim     | 8712  | 6488  | 7438  | 7497  | 7161  | 7645  | 7393  | 10135 | 8345  | 7719  | 8649  | 8263  | 8245  | 8315  | 8708  | 7802  | 7134  | 7258  | 6923  | 8261  | 7409  | 8604  | 8688  | 7817  | 8137  | 7531  | 8529  | 8476  | Rlim     |         |
| Rln1     | 29    | 30    | 17    | 45    | 37    | 30    | 46    | 29    | 25    | 33    | 24    | 21    | 16    | 14    | 42    | 28    | 15    | 42    | 39    | 30    | 40    | 13    | 30    | 20    | 27    | 11    | 28    | 17    | Rln1     |         |
| Rln3     | 1     | 1     | 4     | 0     | 0     | 1     | 0     | 0     | 0     | 0     | 1     | 0     | 0     | 0     | 0     | 1     | 0     | 1     | 3     | 2     | 0     | 3     | 0     | 0     | 0     | 1     | 0     | 0     | 0        | Rln3    |
| Rmc1     | 3787  | 4219  | 2996  | 4114  | 3887  | 3957  | 4140  | 1915  | 2168  | 1744  | 1873  | 1703  | 2058  | 1641  | 3831  | 3562  | 3343  | 4044  | 4033  | 4373  | 4306  | 2095  | 2063  | 1745  | 1771  | 1498  | 1636  | 1712  | Rmc1     |         |
| Rmdn1    | 677   | 460   | 459   | 555   | 622   | 675   | 733   | 924   | 812   | 732   | 799   | 795   | 747   | 778   | 593   | 550   | 451   | 593   | 655   | 704   | 646   | 744   | 832   | 717   | 817   | 586   | 724   | 726   | Rmdn1    |         |
| Rmdn2    | 67    | 50    | 49    | 62    | 60    | 81    | 53    | 418   | 419   | 295   | 423   | 336   | 414   | 368   | 57    | 51    | 44    | 53    | 38    | 60    | 54    | 406   | 493   | 357   | 267   | 398   | 386   | 355   | Rmdn2    |         |
| Rmdn3    | 2880  | 3131  | 3477  | 3258  | 2754  | 2741  | 2951  | 2219  | 2099  | 2296  | 2263  | 2381  | 2402  | 2415  | 2842  | 2923  | 3170  | 3045  | 3200  | 2901  | 2949  | 2423  | 2080  | 2308  | 2387  | 2557  | 2269  | 2499  | Rmdn3    |         |
| Rmi1     | 1617  | 1316  | 1589  | 1423  | 1430  | 1451  | 1685  | 2172  | 1993  | 1898  | 2091  | 2305  | 2154  | 2173  | 1458  | 1435  | 1541  | 1472  | 1520  | 1565  | 1482  | 2156  | 1986  | 2185  | 2045  | 2251  | 2553  | 2369  | Rmi1     |         |
| Rmi2     | 423   | 402   | 609   | 513   | 295   | 374   | 455   | 457   | 439   | 489   | 559   | 792   | 589   | 705   | 365   | 435   | 618   | 401   | 460   | 319   | 430   | 349   | 396   | 579   | 507   | 947   | 744   | 767   | Rmi2     |         |
| Rmnd1    | 2261  | 2162  | 2204  | 2314  | 2201  | 2171  | 2456  | 2694  | 2558  | 2696  | 2604  | 2425  | 2325  | 2521  | 2379  | 2110  | 2278  | 2245  | 2276  | 2366  | 2315  | 2635  | 2782  | 2623  | 2564  | 2258  | 2523  | 2370  | Rmnd1    |         |
| Rmnd5a   | 13883 | 11354 | 12289 | 12675 | 11307 | 11910 | 12671 | 8447  | 7462  | 7649  | 8162  | 8040  | 8350  | 8287  | 12982 | 13441 | 11499 | 12904 | 11228 | 10874 | 12293 | 8091  | 7939  | 7888  | 7757  | 7294  | 8534  | 8445  | Rmnd5a   |         |
| Rmnd5b   | 2495  | 3064  | 2341  | 2694  | 2412  | 2444  | 2272  | 1822  | 1912  | 1903  | 1873  | 2016  | 1907  | 1656  | 2430  | 2608  | 2415  | 2650  | 2566  | 2379  | 2394  | 1998  | 2010  | 1815  | 2131  | 1887  | 1667  | 1671  | Rmnd5b   |         |
| Rnase1   | 5     | 0     | 9     | 0     | 0     | 4     | 0     | 2     | 2     | 0     | 7     | 0     | 0     | 2     | 0     | 0     | 1     | 2     | 0     | 4     | 0     | 2     | 3     | 2     | 0     | 0     | 2     | 2     | Rnase1   |         |
| Rnase10  | 1     | 0     | 0     | 0     | 0     | 0     | 0     | 1     | 5     | 0     | 6     | 2     | 0     | 0     | 0     | 0     | 0     | 0     | 0     | 0     | 0     | 0     | 4     | 0     | 0     | 0     | 1     | 1     | 0        | Rnase10 |
| Rnase11  | 0     | 0     | 0     | 0     | 0     | 0     | 0     | 0     | 0     | 0     | 0     | 0     | 0     | 0     | 0     | 1     | 0     | 0     | 0     | 1     | 0     | 0     | 0     | 0     | 0     | 0     | 0     | 0     | 0        | Rnase11 |
| Rnase12  | 1     | 0     | 0     | 0     | 5     | 0     | 1     | 1     | 2     | 1     | 3     | 1     | 0     | 2     | 0     | 2     | 0     | 2     | 0     | 0     | 2     | 2     | 3     | 3     | 1     | 0     | 2     | 5     | Rnase12  |         |
| Rnase4   | 1025  | 841   | 783   | 553   | 579   | 697   | 451   | 596   | 721   | 554   | 839   | 559   | 718   | 504   | 1029  | 1104  | 630   | 704   | 544   | 664   | 398   | 707   | 1107  | 550   | 526   | 570   | 495   | 515   | Rnase4   |         |
| Rnase6   | 8     | 7     | 4     | 3     | 11    | 9     | 6     | 7     | 12    | 13    | 13    | 5     | 12    | 7     | 7     | 2     | 5     | 0     | 5     | 18    | 4     | 8     | 12    | 13    | 5     | 6     | 7     | 6     | Rnase6   |         |
| Rnaseh1  | 1195  | 1355  | 1396  | 1517  | 1150  | 1335  | 1205  | 1211  | 1258  | 1438  | 1378  | 1501  | 1441  | 1367  | 1179  | 1214  | 1292  | 1366  | 1252  | 1261  | 1193  | 1135  | 1171  | 1439  | 1469  | 1552  | 1483  | 1445  | Rnaseh1  |         |
| Rnaseh2a | 3478  | 3831  | 3867  | 3693  | 2790  | 3129  | 3163  | 1299  | 1725  | 1653  | 1541  | 2269  | 1948  | 2188  | 3378  | 3391  | 3517  | 3373  | 3521  | 3570  | 3208  | 1268  | 1630  | 2029  | 1867  | 2795  | 2464  | 2262  | Rnaseh2a |         |
| Rnaseh2b | 1306  | 1193  | 1171  | 985   | 930   | 1004  | 1398  | 2507  | 2176  | 1802  | 1750  | 2536  | 1949  | 2917  | 1412  | 984   | 1060  | 934   | 1057  | 1323  | 1093  | 1648  | 1849  | 2194  | 2206  | 2948  | 2430  | 2667  | Rnaseh2b |         |
| Rnaseh2c | 2268  | 2985  | 3022  | 2835  | 1928  | 2205  | 2177  | 1546  | 1453  | 1779  | 1566  | 2156  | 1852  | 2273  | 2234  | 2165  | 2951  | 2245  | 2615  | 2563  | 2212  | 1088  | 1398  | 2078  | 1859  | 2395  | 2170  | 2307  | Rnaseh2c |         |
| Rnasek   | 13    | 41    | 36    | 39    | 29    | 24    | 38    | 11    | 16    | 22    | 19    | 10    | 22    | 18    | 20    | 26    | 28    | 20    | 34    | 32    | 28    | 17    | 21    | 16    | 22    | 15    | 23    | 14    | Rnasek   |         |
| Rnaset   | 2228  | 2386  | 2028  | 2843  | 3689  | 3692  | 3253  | 8327  | 6873  | 7839  | 7280  | 8585  | 8568  | 9168  | 3059  | 2206  | 2720  | 2681  | 3257  | 3423  | 3463  | 9299  | 6910  | 7669  | 8874  | 5790  | 8989  | 8278  | Rnaset   |         |
| Rnaset2a | 61    | 68    | 48    | 71    | 43    | 32    | 74    | 31    | 21    | 21    | 19    | 29    | 22    | 40    | 74    | 79    | 29    | 61    | 55    | 72    | 41    | 28    | 29    | 17    | 21    | 51    | 19    | 39    | Rnaset2a |         |
| Rnaset2b | 121   | 107   | 113   | 90    | 115   | 118   | 106   | 66    | 49    | 60    | 51    | 56    | 59    | 54    | 138   | 129   | 137   | 90    | 95    | 119   | 120   | 69    | 58    | 42    | 52    | 63    | 59    | 68    | Rnaset2b |         |
| Rnd1     | 1025  | 2031  | 1660  | 1913  | 1473  | 1587  | 1370  | 460   | 408   | 502   | 368   | 555   | 603   | 657   | 1238  | 1338  | 1778  | 1795  | 1510  | 1644  | 1605  | 488   | 469   | 554   | 543   | 510   | 601   | 673   | Rnd1     |         |
| Rnd2     | 5292  | 7479  | 7717  | 10215 | 9516  | 9514  | 9181  | 6167  | 5824  | 9028  | 6014  | 8413  | 8300  | 7826  | 6910  | 5580  | 10758 | 8779  | 10840 | 8884  | 9288  | 5008  | 4629  | 9422  | 9176  | 8211  | 8351  | 8098  | Rnd2     |         |
| Rnd3     | 12172 | 12130 | 14833 | 14689 | 14415 | 14426 | 13124 | 24389 | 16401 | 19793 | 15997 | 21062 | 23441 | 21865 | 15389 | 12506 | 16111 | 13511 | 14249 | 15228 | 13113 | 22877 | 16764 | 18658 | 20697 | 18274 | 24499 | 22536 | Rnd3     |         |
| Rnf10    | 21516 | 24770 | 27457 | 27544 | 24662 | 22635 | 23703 | 16957 | 18118 | 21084 | 18881 | 21645 | 20026 | 20616 | 20816 | 21246 | 28036 | 26599 | 27419 | 20427 | 25399 | 19905 | 17395 | 21785 | 21167 | 23314 | 19360 | 21430 | Rnf10    |         |
| Rnf103   | 2754  | 2118  | 2332  | 2712  | 2972  | 2826  | 2986  | 3389  | 2804  | 2840  | 2842  | 2742  | 2825  | 2707  | 2702  | 2364  | 2473  | 2834  | 2725  | 2880  | 2921  | 3309  | 2875  | 3105  | 3357  | 2915  | 2840  | 2928  | Rnf103   |         |
| Rnf11    | 6976  | 5244  | 6740  | 7681  | 8809  | 8256  | 9412  | 8819  | 7227  | 7224  | 7836  | 7494  | 7177  | 8298  | 7359  | 5807  | 7063  | 8313  | 8610  | 7600  | 9705  | 9663  | 7991  | 7767  | 8608  | 7372  | 6897  | 7806  | Rnf11    |         |
| Rnf111   | 4280  | 3778  | 5392  | 5590  | 6033  | 5236  | 5643  | 5655  | 4974  | 6105  | 5822  | 6783  | 6102  | 6971  | 4178  | 4292  | 5456  | 5503  | 5837  | 4560  | 6709  | 7377  | 5025  | 6638  | 6993  | 6263  | 5977  | 6950  | Rnf111   |         |
| Rnf112   | 630   | 761   | 602   | 1536  | 2060  | 1587  | 1772  | 1702  | 1751  | 2263  | 1691  | 1577  | 1038  | 1675  | 721   | 586   | 1161  | 1576  | 1923  | 1565  | 2041  | 2485  | 1555  | 2281  | 2454  | 1616  | 1223  | 1205  | Rnf112   |         |
| Rnf113a1 | 351   | 455   | 449   | 367   | 378   | 395   | 389   | 333   | 339   | 317   | 324   | 371   | 413   | 429   | 386   | 326   | 403   | 353   | 413   | 449   | 386   | 306   | 343   | 368   | 311   | 344   | 381   | 396   | Rnf113a1 |         |
| Rnf113a2 | 1175  | 1279  | 1338  | 1268  | 1088  | 1133  | 1195  | 867   | 873   | 866   | 880   | 892   | 1010  | 997   | 1216  | 1093  | 1227  | 1059  | 1288  | 1329  | 1135  | 710   | 791   | 1075  | 846   | 1102  | 1010  | 1005  | Rnf113a2 |         |
| Rnf114   | 6371  | 7855  | 6757  | 6906  | 6157  | 6402  | 5773  | 7113  | 6570  | 5987  | 5783  | 6977  | 6508  | 6526  | 6662  | 6310  | 6954  | 6444  | 6699  | 7039  | 5956  | 6453  | 6435  | 6819  | 6971  | 7571  | 7224  | 7008  | Rnf114   |         |
| Rnf115   | 6690  | 5605  | 6275  | 6011  | 5618  | 6173  | 7019  | 4631  | 3851  | 4390  | 3784  | 4549  | 4449  | 5132  | 6634  | 5796  | 6282  | 5558  | 6209  | 6325  | 6610  | 4475  | 3916  | 4355  | 4275  | 5077  | 4779  | 5345  | Rnf115   |         |
| Rnf121   | 3500  | 3438  | 3091  | 2936  | 3041  | 3111  | 2833  | 3366  | 3079  | 2785  | 2862  | 3030  | 2916  | 2715  | 3432  | 3283  | 2945  | 2849  | 3006  | 3234  | 2940  | 3029  | 2974  | 2718  | 3184  | 2913  | 3025  | 2856  | Rnf121   |         |
| Rnf122   | 2900  | 3280  | 2932  | 2697  | 3100  | 3052  | 2833  | 3639  | 3389  | 3492  | 3152  | 4044  | 3877  | 3778  | 2854  | 2684  | 3014  | 2664  | 3206  | 2952  | 2853  | 3395  | 3447  | 3628  | 3739  | 3937  | 4299  | 4319  | Rnf122   |         |
| Rnf123   | 3279  | 3978  | 3826  | 4256  | 4529  | 4194  | 3900  | 3591  | 4248  | 4494  | 4133  | 4502  | 4283  | 3901  | 3236  | 3731  | 4140  | 4199  | 4642  | 3534  | 4106  | 4430  | 4001  | 4327  | 4903  | 3483  |       |       |          |         |

|         |       |       |       |       |       |       |       |       |       |       |       |       |       |       |       |       |       |       |       |       |       |       |       |       |       |       |       |       |         |      |
|---------|-------|-------|-------|-------|-------|-------|-------|-------|-------|-------|-------|-------|-------|-------|-------|-------|-------|-------|-------|-------|-------|-------|-------|-------|-------|-------|-------|-------|---------|------|
| Rnf181  | 263   | 622   | 171   | 195   | 153   | 239   | 394   | 158   | 107   | 104   | 103   | 91    | 237   | 81    | 415   | 206   | 184   | 227   | 196   | 350   | 170   | 755   | 90    | 107   | 128   | 109   | 108   | 112   | Rnf181  |      |
| Rnf182  | 1926  | 1851  | 2111  | 2788  | 3487  | 2714  | 3103  | 1958  | 1920  | 2407  | 1937  | 1601  | 1538  | 1702  | 2116  | 1819  | 2699  | 2853  | 3188  | 2867  | 3275  | 2162  | 1978  | 2278  | 2238  | 2151  | 1445  | 1563  | Rnf182  |      |
| Rnf183  | 7     | 10    | 20    | 28    | 7     | 19    | 28    | 1     | 2     | 8     | 13    | 1     | 5     | 4     | 16    | 9     | 30    | 26    | 33    | 17    | 23    | 8     | 6     | 1     | 11    | 7     | 0     | 8     | Rnf183  |      |
| Rnf185  | 6133  | 6449  | 5750  | 5410  | 4912  | 4795  | 5209  | 3599  | 3215  | 3367  | 3142  | 3704  | 3339  | 3505  | 6298  | 5668  | 5730  | 5269  | 5401  | 5541  | 5232  | 3559  | 3198  | 3380  | 3486  | 3812  | 3785  | 3786  | Rnf185  |      |
| Rnf186  | 0     | 0     | 0     | 0     | 0     | 0     | 0     | 0     | 1     | 0     | 0     | 0     | 0     | 0     | 0     | 0     | 0     | 0     | 0     | 0     | 0     | 0     | 0     | 0     | 0     | 0     | 0     | 0     | Rnf186  |      |
| Rnf187  | 16368 | 20823 | 20077 | 22187 | 21692 | 19315 | 18859 | 13516 | 14991 | 16629 | 15072 | 16588 | 14550 | 14835 | 16429 | 18264 | 22489 | 21828 | 22285 | 18902 | 19842 | 16066 | 14904 | 17051 | 16866 | 17706 | 14476 | 15302 | Rnf187  |      |
| Rnf19a  | 5702  | 5119  | 4787  | 5421  | 5710  | 5629  | 5921  | 6067  | 5184  | 4612  | 4617  | 4554  | 4736  | 4764  | 5988  | 5233  | 4816  | 5385  | 5391  | 5915  | 5834  | 5384  | 5207  | 4411  | 5019  | 4960  | 4903  | 4631  | Rnf19a  |      |
| Rnf19b  | 2623  | 2892  | 2463  | 3663  | 3700  | 3303  | 3398  | 2332  | 2244  | 2640  | 2281  | 2252  | 1970  | 2228  | 2595  | 2795  | 2946  | 3583  | 3732  | 3228  | 3653  | 2891  | 2460  | 2465  | 2939  | 2132  | 1901  | 2260  | Rnf19b  |      |
| Rnf2    | 11470 | 8618  | 10148 | 9814  | 10429 | 10624 | 11534 | 13991 | 10874 | 9653  | 9949  | 11271 | 10947 | 12013 | 12129 | 10520 | 9677  | 10311 | 10493 | 11937 | 10765 | 11824 | 11250 | 10034 | 10429 | 12131 | 12112 | 12277 | Rnf2    |      |
| Rnf20   | 17786 | 16639 | 15314 | 15921 | 14838 | 15447 | 17497 | 15748 | 13277 | 12822 | 12856 | 13261 | 13477 | 15539 | 18315 | 15923 | 15316 | 16105 | 14284 | 16691 | 16615 | 13095 | 12605 | 13538 | 13479 | 12779 | 14911 | 14116 | Rnf20   |      |
| Rnf207  | 111   | 118   | 133   | 120   | 204   | 126   | 116   | 160   | 166   | 213   | 148   | 179   | 198   | 150   | 128   | 131   | 130   | 124   | 121   | 126   | 111   | 234   | 128   | 145   | 172   | 104   | 167   | 180   | Rnf207  |      |
| Rnf208  | 745   | 1014  | 1227  | 1289  | 1496  | 1278  | 1082  | 680   | 849   | 1122  | 895   | 838   | 655   | 617   | 740   | 745   | 1314  | 1197  | 1574  | 1073  | 1218  | 1186  | 809   | 929   | 1108  | 740   | 632   | 600   | Rnf208  |      |
| Rnf212  | 0     | 5     | 9     | 0     | 2     | 0     | 0     | 0     | 0     | 1     | 1     | 3     | 11    | 11    | 1     | 6     | 0     | 0     | 2     | 1     | 2     | 2     | 1     | 2     | 0     | 3     | 6     | 24    | Rnf212  |      |
| Rnf212b | 0     | 0     | 0     | 0     | 0     | 0     | 0     | 0     | 2     | 0     | 0     | 2     | 0     | 4     | 0     | 0     | 0     | 0     | 0     | 0     | 1     | 0     | 1     | 0     | 2     | 0     | 1     | 1     | Rnf212b |      |
| Rnf213  | 1751  | 1564  | 710   | 868   | 926   | 1332  | 856   | 1011  | 1147  | 822   | 1390  | 742   | 832   | 765   | 1456  | 1920  | 673   | 841   | 778   | 1972  | 1281  | 770   | 1315  | 720   | 719   | 615   | 1219  | 825   | Rnf213  |      |
| Rnf214  | 5344  | 5216  | 3704  | 5333  | 5929  | 6362  | 5840  | 6324  | 6323  | 7245  | 6612  | 6614  | 6489  | 6538  | 5619  | 5276  | 4497  | 5118  | 5620  | 5475  | 6595  | 6391  | 5848  | 5215  | 7421  | 3968  | 6744  | 6054  | Rnf214  |      |
| Rnf215  | 1458  | 1646  | 1481  | 1815  | 2050  | 1869  | 1590  | 2357  | 2604  | 2836  | 2578  | 2629  | 2409  | 2427  | 1429  | 1407  | 1668  | 1687  | 1922  | 1745  | 1752  | 2720  | 2563  | 2645  | 2894  | 2326  | 2435  | 2280  | Rnf215  |      |
| Rnf216  | 4470  | 4717  | 5395  | 5399  | 5483  | 4952  | 5418  | 3940  | 4435  | 4652  | 4569  | 5296  | 4791  | 5151  | 4261  | 4753  | 5562  | 5547  | 6194  | 4365  | 5365  | 4737  | 4516  | 4968  | 4837  | 5678  | 4700  | 5158  | Rnf216  |      |
| Rnf217  | 1226  | 928   | 984   | 1164  | 1730  | 1691  | 1734  | 2243  | 2312  | 1799  | 2488  | 1782  | 1858  | 1947  | 1275  | 1203  | 949   | 1129  | 1473  | 1735  | 1691  | 2077  | 2346  | 1586  | 1962  | 1469  | 1722  | 1799  | Rnf217  |      |
| Rnf220  | 4875  | 5860  | 6483  | 6148  | 6789  | 6425  | 6259  | 5671  | 6058  | 7554  | 6492  | 7818  | 6676  | 7207  | 5211  | 5206  | 6700  | 6554  | 7379  | 5864  | 6349  | 7319  | 6093  | 7786  | 7879  | 8305  | 6940  | 7175  | Rnf220  |      |
| Rnf222  | 3     | 4     | 15    | 8     | 4     | 8     | 6     | 9     | 12    | 11    | 11    | 9     | 11    | 4     | 5     | 4     | 13    | 11    | 11    | 3     | 11    | 12    | 10    | 2     | 4     | 10    | 6     | 6     | Rnf222  |      |
| Rnf223  | 276   | 491   | 440   | 462   | 405   | 331   | 412   | 96    | 165   | 142   | 144   | 159   | 150   | 159   | 305   | 393   | 593   | 432   | 465   | 367   | 374   | 165   | 117   | 169   | 170   | 189   | 173   | 140   | Rnf223  |      |
| Rnf224  | 0     | 0     | 0     | 0     | 1     | 0     | 0     | 0     | 0     | 0     | 0     | 0     | 0     | 0     | 1     | 0     | 0     | 0     | 0     | 0     | 0     | 2     | 0     | 0     | 3     | 0     | 0     | 0     | Rnf224  |      |
| Rnf225  | 218   | 286   | 240   | 303   | 229   | 214   | 248   | 131   | 127   | 125   | 134   | 189   | 135   | 162   | 195   | 259   | 270   | 269   | 205   | 203   | 220   | 124   | 126   | 150   | 143   | 126   | 162   | 186   | Rnf225  |      |
| Rnf227  | 3794  | 3506  | 3543  | 5728  | 6671  | 5896  | 7213  | 4857  | 3670  | 4085  | 3743  | 3079  | 2484  | 3319  | 4858  | 3377  | 4832  | 6217  | 6263  | 6982  | 7230  | 5125  | 3796  | 3651  | 4740  | 2708  | 2905  | 2890  | Rnf227  |      |
| Rnf24   | 6141  | 5244  | 4728  | 5303  | 6390  | 6261  | 6566  | 6293  | 5580  | 6084  | 5419  | 5691  | 5164  | 6019  | 5792  | 5154  | 5190  | 5708  | 6096  | 5494  | 6574  | 7210  | 5196  | 5431  | 6824  | 4488  | 5444  | 5749  | Rnf24   |      |
| Rnf25   | 2496  | 2804  | 2653  | 2614  | 2420  | 2517  | 2287  | 2684  | 2725  | 2892  | 2798  | 2755  | 2572  | 2528  | 2483  | 2625  | 2685  | 2545  | 2423  | 2500  | 2224  | 2939  | 2657  | 2719  | 2762  | 3022  | 2882  | 2676  | Rnf25   |      |
| Rnf26   | 711   | 714   | 785   | 638   | 536   | 579   | 788   | 525   | 536   | 519   | 748   | 670   | 722   | 1012  | 650   | 628   | 702   | 748   | 614   | 547   | 651   | 540   | 537   | 812   | 711   | 984   | 739   | 994   | Rnf26   |      |
| Rnf31   | 2208  | 2826  | 2086  | 2981  | 2644  | 2571  | 2361  | 1602  | 1939  | 2133  | 2118  | 2192  | 1965  | 2072  | 2051  | 2653  | 2549  | 2938  | 2086  | 2661  | 2222  | 1935  | 2031  | 2228  | 1635  | 2055  | 1912  | Rnf31 |         |      |
| Rnf32   | 702   | 708   | 606   | 653   | 668   | 602   | 797   | 666   | 715   | 642   | 538   | 531   | 472   | 583   | 793   | 713   | 667   | 768   | 704   | 859   | 802   | 719   | 654   | 480   | 701   | 466   | 492   | 533   | Rnf32   |      |
| Rnf34   | 5901  | 6205  | 5479  | 5809  | 4626  | 4809  | 5256  | 4350  | 3700  | 3440  | 3089  | 3594  | 3612  | 3797  | 6045  | 5879  | 5289  | 5644  | 5003  | 5759  | 5365  | 3506  | 3576  | 3507  | 3657  | 4058  | 3850  | 4041  | Rnf34   |      |
| Rnf38   | 14378 | 11945 | 14272 | 16846 | 18202 | 18146 | 18423 | 18208 | 15947 | 18242 | 16938 | 20770 | 18978 | 20530 | 14654 | 13458 | 16545 | 17357 | 17147 | 15516 | 18457 | 21534 | 14533 | 18396 | 21057 | 17263 | 19414 | 19534 | Rnf38   |      |
| Rnf39   | 16    | 6     | 15    | 4     | 10    | 8     | 12    | 6     | 1     | 9     | 0     | 3     | 2     | 9     | 19    | 3     | 13    | 7     | 9     | 6     | 3     | 13    | 2     | 4     | 2     | 2     | 2     | 0     | Rnf39   |      |
| Rnf4    | 13976 | 13319 | 11755 | 10826 | 10533 | 10915 | 12178 | 12044 | 10654 | 8921  | 9447  | 10725 | 10440 | 11196 | 13776 | 12579 | 11456 | 10726 | 11287 | 12751 | 11689 | 9919  | 10738 | 9568  | 9596  | 11975 | 11211 | 11910 | Rnf4    |      |
| Rnf40   | 6895  | 8202  | 8561  | 9372  | 7647  | 7633  | 7785  | 5835  | 6756  | 7336  | 7252  | 8012  | 7223  | 8174  | 6163  | 7199  | 9041  | 8655  | 8567  | 6476  | 8234  | 6684  | 6314  | 8103  | 7914  | 8163  | 7710  | 8262  | Rnf40   |      |
| Rnf41   | 4601  | 5725  | 4186  | 5562  | 5632  | 5398  | 5237  | 4621  | 4647  | 4635  | 4173  | 4375  | 4075  | 4427  | 4632  | 4455  | 4919  | 5304  | 5710  | 5480  | 5641  | 4436  | 4577  | 4476  | 5007  | 4262  | 4328  | 4227  | Rnf41   |      |
| Rnf43   | 446   | 277   | 353   | 288   | 227   | 285   | 261   | 275   | 407   | 341   | 300   | 184   | 296   | 225   | 285   | 474   | 269   | 397   | 255   | 225   | 244   | 154   | 499   | 377   | 139   | 310   | 184   | 210   | Rnf43   |      |
| Rnf44   | 6290  | 8137  | 10694 | 9358  | 8695  | 7478  | 7614  | 7507  | 8319  | 10760 | 9431  | 12841 | 10061 | 12125 | 6057  | 7058  | 10948 | 8920  | 9432  | 6322  | 7603  | 10606 | 7804  | 12243 | 11416 | 13974 | 10758 | 12132 | Rnf44   |      |
| Rnf5    | 4254  | 5823  | 6029  | 5497  | 5067  | 4338  | 5330  | 3980  | 3798  | 4423  | 3665  | 4574  | 4045  | 4801  | 4683  | 4329  | 6508  | 5251  | 5669  | 5525  | 4873  | 3930  | 3550  | 5058  | 4770  | 5366  | 4811  | 4677  | Rnf5    |      |
| Rnf6    | 2150  | 2141  | 2139  | 2012  | 1742  | 1743  | 1989  | 1752  | 1646  | 1753  | 1909  | 1720  | 1606  | 1816  | 2089  | 2169  | 1986  | 2174  | 1695  | 2080  | 1992  | 1581  | 1918  | 1976  | 1772  | 1949  | 1726  | 1877  | Rnf6    |      |
| Rnf7    | 6100  | 5551  | 5977  | 5039  | 4974  | 4811  | 5510  | 6603  | 5876  | 5664  | 5677  | 6380  | 6301  | 6951  | 6132  | 5806  | 5460  | 4724  | 4999  | 5655  | 4932  | 5691  | 6325  | 6194  | 5536  | 7275  | 7032  | 7358  | Rnf7    |      |
| Rnf8    | 769   | 742   | 890   | 803   | 781   | 824   | 991   | 750   | 645   | 770   | 719   | 775   | 799   | 902   | 655   | 664   | 809   | 847   | 884   | 816   | 894   | 735   | 594   | 852   | 865   | 807   | 760   | 945   | Rnf8    |      |
| Rnf1    | 2675  | 1792  | 2260  | 1816  | 1822  | 1753  | 1744  | 1657  | 1593  | 1444  | 1817  | 1421  | 1630  | 1535  | 2411  | 2238  | 1949  | 2016  | 1699  | 2136  | 1640  | 1638  | 1836  | 1482  | 1429  | 1666  | 1461  | 1557  | Rnf1    |      |
| Rnf2    | 4180  | 5173  | 4315  | 5769  | 6200  | 5887  | 5830  | 4257  | 4361  | 4506  | 4366  | 4286  | 4366  | 4302  | 4406  | 4268  | 5233  | 5862  | 6248  | 5301  | 6249  | 5446  | 4124  | 4417  | 5312  | 3561  | 4363  | 4098  | Rnf2    |      |
| Rngtt   | 7191  | 6424  | 6275  | 6304  | 5704  | 6192  | 7185  | 4407  | 3490  | 3448  | 3054  | 3700  | 3392  | 3772  | 7721  | 6738  | 6283  | 6103  | 5877  | 7060  | 6579  | 3603  | 3490  | 3352  | 3383  | 3460  | 3711  | 3790  | Rngtt   |      |
| Rnh1    | 1752  | 1751  | 1425  | 1138  | 1132  | 1348  | 995   | 2549  | 3148  | 2431  | 2630  | 2508  | 1510  | 1132  | 2305  | 1590  | 1664  | 1465  | 1209  | 1276  | 1224  | 1121  | 2291  | 3451  | 2522  | 2280  | 3126  | 2636  | 2580    | Rnh1 |
| Rnmt    | 10416 | 9540  | 8659  | 9439  | 9326  | 9596  | 11203 | 8310  | 6817  | 6490  | 5904  | 7274  | 6346  | 7562  | 11234 | 9766  | 9128  | 9584  | 9168  | 11159 | 10621 | 7070  | 6490  | 6784  | 7496  | 5989  | 7275  | 7074  | Rnmt    |      |
| Rnpc3   | 2050  | 1715  | 1632  | 2014  | 2408  | 2311  | 2465  | 4169  | 3344  | 3167  | 2928  | 3241  | 3064  | 3232  | 2421  | 1912  | 1     |       |       |       |       |       |       |       |       |       |       |       |         |      |

|           |       |       |       |       |       |       |       |       |       |       |       |       |       |       |       |       |       |       |       |       |       |       |       |       |       |       |       |        |           |       |
|-----------|-------|-------|-------|-------|-------|-------|-------|-------|-------|-------|-------|-------|-------|-------|-------|-------|-------|-------|-------|-------|-------|-------|-------|-------|-------|-------|-------|--------|-----------|-------|
| Rpap3     | 3032  | 2747  | 3541  | 2990  | 2969  | 3047  | 3391  | 2431  | 2573  | 2599  | 2347  | 2964  | 2879  | 3279  | 2918  | 2886  | 3038  | 2771  | 2694  | 3081  | 3028  | 2403  | 2577  | 2770  | 2760  | 3101  | 3072  | 3321   | Rpap3     |       |
| Rpe       | 4315  | 3653  | 4130  | 3437  | 3220  | 3225  | 3766  | 3638  | 3109  | 2679  | 2685  | 3266  | 2836  | 3235  | 4820  | 4059  | 3907  | 3358  | 3383  | 4238  | 3506  | 2789  | 3177  | 3030  | 2650  | 3427  | 3287  | 3457   | Rpe       |       |
| Rpe65     | 1     | 1     | 0     | 0     | 0     | 0     | 0     | 0     | 0     | 2     | 0     | 4     | 0     | 0     | 0     | 0     | 0     | 0     | 0     | 0     | 0     | 0     | 3     | 0     | 0     | 0     | 0     | 0      | 0         | Rpe65 |
| Rpf1      | 1916  | 1811  | 2035  | 1745  | 1705  | 1724  | 1991  | 2964  | 2391  | 2513  | 2119  | 3032  | 2581  | 3147  | 2107  | 1636  | 2021  | 1636  | 1944  | 2005  | 1818  | 2378  | 2291  | 2800  | 2665  | 3436  | 3168  | 3069   | Rpf1      |       |
| Rpf2      | 2288  | 1921  | 2375  | 2322  | 2098  | 2029  | 2529  | 2772  | 2338  | 2140  | 2114  | 2409  | 2359  | 2900  | 2571  | 2185  | 2106  | 1975  | 2207  | 2749  | 2373  | 2379  | 2256  | 2473  | 2528  | 3002  | 2828  | 3072   | Rpf2      |       |
| Rppr      | 4194  | 3649  | 4016  | 3810  | 4047  | 4285  | 4507  | 5737  | 4341  | 4222  | 4095  | 4896  | 4841  | 5314  | 4619  | 3959  | 4015  | 3559  | 3926  | 5074  | 4286  | 4809  | 4471  | 4155  | 5012  | 4389  | 5112  | 4847   | Rppr      |       |
| Rpprip1   | 66    | 60    | 45    | 65    | 100   | 92    | 85    | 154   | 144   | 167   | 130   | 106   | 108   | 90    | 74    | 68    | 90    | 87    | 110   | 73    | 73    | 112   | 121   | 122   | 137   | 88    | 113   | 104    | Rpprip1   |       |
| Rpprip1l  | 5864  | 5109  | 4090  | 4093  | 3353  | 4010  | 4123  | 3596  | 3250  | 2659  | 2709  | 2944  | 2944  | 2809  | 5889  | 5304  | 4335  | 3832  | 3557  | 4551  | 4160  | 2642  | 3210  | 2570  | 2591  | 2063  | 2975  | 2813   | Rpprip1l  |       |
| Rph3a     | 283   | 442   | 488   | 1067  | 1861  | 1148  | 1179  | 1161  | 1463  | 1795  | 1472  | 1019  | 949   | 1098  | 504   | 396   | 851   | 1157  | 1442  | 986   | 1344  | 2374  | 1135  | 1409  | 2037  | 1048  | 681   | 879    | Rph3a     |       |
| Rph3al    | 174   | 244   | 195   | 152   | 176   | 167   | 161   | 151   | 171   | 222   | 161   | 118   | 159   | 114   | 183   | 224   | 220   | 142   | 215   | 167   | 151   | 139   | 211   | 152   | 152   | 181   | 95    | 125    | Rph3al    |       |
| Rpia      | 2112  | 2168  | 2746  | 2793  | 2329  | 2275  | 2367  | 1788  | 1826  | 1914  | 1914  | 2149  | 1944  | 2190  | 2181  | 2121  | 2600  | 2651  | 2388  | 2261  | 2330  | 1963  | 1759  | 2090  | 2146  | 2842  | 2122  | 2213   | Rpia      |       |
| Rpl10     | 23626 | 27775 | 25466 | 23865 | 21350 | 25511 | 23902 | 22517 | 27480 | 21501 | 25401 | 24083 | 26045 | 24621 | 24266 | 28241 | 23364 | 24223 | 25323 | 30561 | 23164 | 18229 | 28293 | 23430 | 23713 | 29486 | 27798 | 26320  | Rpl10     |       |
| Rpl10a    | 21527 | 25952 | 21855 | 19916 | 15843 | 17096 | 17734 | 17857 | 22279 | 19407 | 20305 | 19891 | 20373 | 22009 | 19694 | 21387 | 19943 | 18127 | 18773 | 21111 | 18603 | 14641 | 22895 | 20958 | 18343 | 25623 | 21875 | 23292  | Rpl10a    |       |
| Rpl10-ps3 | 130   | 82    | 68    | 70    | 62    | 90    | 106   | 1308  | 73    | 61    | 75    | 91    | 83    | 83    | 125   | 87    | 56    | 87    | 83    | 115   | 99    | 112   | 72    | 86    | 100   | 82    | 100   | 97     | Rpl10-ps3 |       |
| Rpl11     | 21713 | 24396 | 24113 | 21838 | 17970 | 17949 | 22302 | 20508 | 21656 | 23245 | 22429 | 22637 | 22622 | 27746 | 21378 | 20718 | 22855 | 19805 | 19625 | 25044 | 21588 | 15649 | 22269 | 25522 | 21652 | 27143 | 24970 | 28656  | Rpl11     |       |
| Rpl12     | 17108 | 25543 | 24578 | 20787 | 16868 | 18189 | 17879 | 18523 | 21971 | 19618 | 22154 | 20751 | 22403 | 21401 | 19885 | 22338 | 21850 | 19558 | 19546 | 23891 | 17464 | 13341 | 22440 | 22452 | 19332 | 27272 | 23800 | 24141  | Rpl12     |       |
| Rpl13     | 29314 | 34138 | 28362 | 27167 | 23626 | 24388 | 24896 | 27645 | 30920 | 27916 | 29919 | 27620 | 29430 | 30352 | 27667 | 28100 | 28267 | 25543 | 26881 | 29618 | 24439 | 21031 | 31065 | 31016 | 26700 | 34427 | 30811 | 32554  | Rpl13     |       |
| Rpl13a    | 1341  | 1355  | 1292  | 1301  | 1021  | 1028  | 1549  | 1630  | 1187  | 1174  | 1379  | 1556  | 1260  | 2225  | 1246  | 833   | 1245  | 1096  | 1170  | 1174  | 1699  | 1242  | 1284  | 1919  | 1424  | 1506  | 1521  | 2127   | Rpl13a    |       |
| Rpl14     | 24112 | 27153 | 29041 | 23284 | 19302 | 20245 | 22911 | 21550 | 23529 | 24299 | 25224 | 24484 | 25382 | 27940 | 23114 | 25221 | 25190 | 21206 | 20440 | 25854 | 21036 | 16177 | 24419 | 25691 | 23119 | 32308 | 27632 | 30725  | Rpl14     |       |
| Rpl15     | 29389 | 30803 | 29155 | 29338 | 26867 | 28763 | 29513 | 28955 | 30635 | 26066 | 27772 | 27002 | 28233 | 28237 | 29590 | 29718 | 28292 | 28630 | 29862 | 33413 | 29387 | 22583 | 32668 | 27356 | 27852 | 33390 | 3041  | 30617  | Rpl15     |       |
| Rpl17     | 7474  | 14715 | 17778 | 13422 | 13864 | 11032 | 16553 | 9558  | 14559 | 15419 | 13564 | 15393 | 11637 | 17492 | 8831  | 14039 | 12381 | 12319 | 16096 | 16994 | 15128 | 3603  | 17713 | 12828 | 9405  | 16459 | 18091 | 16720  | Rpl17     |       |
| Rpl18     | 22300 | 28998 | 25134 | 25414 | 19467 | 21080 | 20533 | 18890 | 21197 | 21519 | 22323 | 21721 | 22160 | 23263 | 21415 | 21855 | 24886 | 22148 | 24758 | 26720 | 22739 | 14352 | 23127 | 24114 | 21644 | 27777 | 25356 | 24932  | Rpl18     |       |
| Rpl18a    | 16278 | 21255 | 18175 | 18642 | 15633 | 18064 | 15008 | 15819 | 19298 | 16223 | 17823 | 17107 | 19781 | 16179 | 16561 | 19013 | 17700 | 16549 | 19671 | 23549 | 16087 | 12216 | 19926 | 20149 | 17497 | 21456 | 21835 | 18838  | Rpl18a    |       |
| Rpl19     | 6534  | 8016  | 5581  | 6636  | 5267  | 5704  | 7366  | 5992  | 6096  | 7172  | 6452  | 6047  | 6273  | 10128 | 6297  | 5913  | 6551  | 5434  | 5422  | 6948  | 8150  | 4878  | 6313  | 7678  | 5886  | 6864  | 6722  | 9433   | Rpl19     |       |
| Rpl21     | 6730  | 8260  | 8293  | 7422  | 7521  | 6348  | 7266  | 7477  | 6625  | 7774  | 8566  | 6720  | 6397  | 10651 | 6600  | 5245  | 5891  | 5683  | 5338  | 6392  | 9013  | 5096  | 7680  | 9370  | 7181  | 8282  | 6120  | 10219  | Rpl21     |       |
| Rpl22     | 23822 | 22110 | 23922 | 22720 | 19067 | 19583 | 22338 | 20421 | 20338 | 19174 | 20378 | 19345 | 20610 | 22288 | 23004 | 21461 | 22051 | 20393 | 19830 | 24092 | 21194 | 15884 | 20895 | 22043 | 19502 | 24086 | 21367 | 23799  | Rpl22     |       |
| Rpl221    | 8397  | 5713  | 8414  | 8736  | 6774  | 7444  | 9888  | 8361  | 7150  | 8560  | 8636  | 8571  | 9365  | 9582  | 8043  | 6694  | 7715  | 6927  | 7449  | 9357  | 8438  | 5890  | 7534  | 9580  | 7854  | 10266 | 9577  | 11097  | Rpl221    |       |
| Rpl23     | 24322 | 23500 | 28466 | 25320 | 20211 | 18565 | 27306 | 23132 | 20689 | 24451 | 25406 | 22803 | 23853 | 34187 | 24005 | 20422 | 26445 | 22740 | 20578 | 25216 | 25855 | 17741 | 21557 | 27307 | 23775 | 29189 | 24474 | 32739  | Rpl23     |       |
| Rpl23a    | 20882 | 28179 | 24492 | 19411 | 19726 | 19133 | 18439 | 20458 | 23282 | 24712 | 23057 | 22134 | 21349 | 23839 | 21096 | 20414 | 23526 | 20657 | 22158 | 23769 | 21475 | 15401 | 25023 | 24905 | 22021 | 26461 | 23095 | 23629  | Rpl23a    |       |
| Rpl24     | 60    | 56    | 60    | 95    | 61    | 22    | 56    | 88    | 74    | 82    | 66    | 72    | 64    | 78    | 54    | 69    | 56    | 85    | 51    | 74    | 66    | 70    | 73    | 60    | 60    | 90    | 63    | 89     | Rpl24     |       |
| Rpl26     | 31881 | 31682 | 28706 | 29163 | 25570 | 28086 | 29433 | 29264 | 30814 | 28070 | 29292 | 28176 | 31547 | 29793 | 32762 | 30799 | 27787 | 26798 | 29914 | 37319 | 28213 | 23983 | 31924 | 28945 | 27057 | 34859 | 32913 | 32149  | Rpl26     |       |
| Rpl27     | 16957 | 18527 | 20750 | 20742 | 17019 | 15841 | 20128 | 16452 | 17623 | 17695 | 20712 | 19318 | 21361 | 23918 | 15654 | 15351 | 19966 | 18153 | 19830 | 21134 | 18943 | 12747 | 17374 | 21596 | 20650 | 25222 | 23353 | 24954  | Rpl27     |       |
| Rpl27a    | 22912 | 25461 | 22601 | 22275 | 18023 | 19560 | 22009 | 21498 | 21156 | 22158 | 23516 | 20680 | 22857 | 27438 | 22598 | 19501 | 21983 | 20329 | 21362 | 25001 | 22322 | 15422 | 22605 | 20731 | 26251 | 24264 | 27108 | Rpl27a |           |       |
| Rpl28     | 18403 | 25409 | 24832 | 23510 | 18072 | 17668 | 18728 | 16472 | 20294 | 22944 | 23373 | 21027 | 22363 | 24911 | 16361 | 17550 | 24278 | 21053 | 20851 | 20246 | 21077 | 14375 | 20463 | 25918 | 21272 | 28532 | 24539 | 26119  | Rpl28     |       |
| Rpl29     | 9840  | 13003 | 9812  | 10712 | 8784  | 8585  | 9400  | 9191  | 16136 | 11123 | 10267 | 10465 | 11387 | 11302 | 15177 | 19186 | 10209 | 9044  | 13651 | 12068 | 8888  | 10164 | 14417 | 10968 | 11004 | 12512 | 12117 | 11325  | Rpl29     |       |
| Rpl30     | 61554 | 67617 | 58550 | 52412 | 45236 | 49139 | 52346 | 52567 | 56729 | 45472 | 50845 | 51692 | 51877 | 54073 | 60488 | 60820 | 53340 | 50815 | 49984 | 57322 | 51859 | 40200 | 58016 | 51569 | 46946 | 61327 | 56428 | 60392  | Rpl30     |       |
| Rpl30     | 18120 | 14737 | 19567 | 17480 | 14840 | 14035 | 20031 | 17061 | 16855 | 18401 | 16194 | 9670  | 16299 | 18337 | 17571 | 14163 | 12645 | 14635 | 14145 | 15405 | 17493 | 7484  | 14185 | 14477 | 18395 | 12968 | 18441 | 27442  | Rpl30     |       |
| Rpl31     | 27299 | 26631 | 24165 | 24093 | 19150 | 17677 | 28861 | 26203 | 23521 | 22394 | 23301 | 20631 | 22311 | 31482 | 27051 | 20510 | 23995 | 21200 | 20979 | 24976 | 28047 | 19460 | 23761 | 26041 | 22479 | 25567 | 23928 | 33276  | Rpl31     |       |
| Rpl32     | 26550 | 28982 | 25274 | 24908 | 21018 | 22347 | 26759 | 24483 | 24478 | 24641 | 25946 | 23836 | 26863 | 31173 | 25897 | 22786 | 25095 | 22850 | 24199 | 28096 | 25732 | 18615 | 25009 | 27729 | 24398 | 29459 | 27778 | 32257  | Rpl32     |       |
| Rpl34     | 17684 | 20636 | 20366 | 22406 | 18924 | 18770 | 23608 | 17591 | 19770 | 20373 | 23921 | 19655 | 21647 | 23570 | 16656 | 15767 | 21205 | 19893 | 20775 | 23635 | 21731 | 12582 | 19575 | 23234 | 22258 | 23497 | 21454 | 25047  | Rpl34     |       |
| Rpl35     | 17085 | 23678 | 22352 | 24297 | 19136 | 18922 | 22819 | 16455 | 20106 | 21881 | 22220 | 20588 | 22712 | 25679 | 17609 | 18408 | 22425 | 20966 | 22093 | 26240 | 24036 | 12053 | 21347 | 24315 | 22733 | 25236 | 23850 | 26915  | Rpl35     |       |
| Rpl35a    | 15541 | 15075 | 16767 | 16769 | 12870 | 10949 | 18508 | 15376 | 13038 | 15595 | 17111 | 14124 | 14848 | 22435 | 14919 | 16026 | 16901 | 14732 | 14468 | 15569 | 17205 | 10758 | 13337 | 16779 | 15900 | 18288 | 16114 | 22483  | Rpl35a    |       |
| Rpl36     | 9103  | 11882 | 10014 | 11721 | 8876  | 7940  | 10910 | 8495  | 9357  | 11104 | 12351 | 9616  | 10951 | 12334 | 8156  | 6774  | 10776 | 9215  | 10173 | 10314 | 11138 | 6288  | 9346  | 12300 | 11332 | 11991 | 10851 | 12936  | Rpl36     |       |
| Rpl36a    | 16932 | 14559 | 15760 | 16500 | 12715 | 11718 | 19144 | 16442 | 14450 | 15272 | 19011 | 14393 | 16667 | 24244 | 16250 | 11461 |       |       |       |       |       |       |       |       |       |       |       |        |           |       |



|           |       |       |       |       |       |       |       |       |       |       |       |       |       |       |       |       |       |       |       |       |       |       |       |       |       |       |       |       |           |
|-----------|-------|-------|-------|-------|-------|-------|-------|-------|-------|-------|-------|-------|-------|-------|-------|-------|-------|-------|-------|-------|-------|-------|-------|-------|-------|-------|-------|-------|-----------|
| Rps10     | 478   | 669   | 574   | 692   | 412   | 477   | 448   | 519   | 492   | 448   | 469   | 527   | 449   | 466   | 423   | 629   | 627   | 605   | 569   | 482   | 450   | 451   | 484   | 502   | 456   | 624   | 568   | 530   | Rps10     |
| Rps11     | 38514 | 35922 | 35273 | 32333 | 26160 | 28359 | 32918 | 34899 | 30268 | 29312 | 30992 | 31997 | 34429 | 41616 | 35311 | 28561 | 32969 | 29101 | 31789 | 31325 | 33213 | 29698 | 31725 | 35678 | 32213 | 41414 | 39252 | 43155 | Rps11     |
| Rps12     | 14731 | 17624 | 17125 | 14745 | 15227 | 11001 | 16479 | 13496 | 16586 | 13776 | 17628 | 12706 | 11904 | 17113 | 17198 | 14895 | 19316 | 13337 | 13989 | 13876 | 14370 | 8540  | 17662 | 20251 | 16724 | 19692 | 17572 | 16714 | Rps12     |
| Rps13     | 17985 | 23177 | 20216 | 19025 | 17566 | 17184 | 21596 | 17307 | 18634 | 18272 | 20347 | 20546 | 22651 | 24141 | 16664 | 17803 | 19607 | 17398 | 19417 | 20626 | 20142 | 14437 | 18797 | 22197 | 19914 | 25496 | 23692 | 26985 | Rps13     |
| Rps14     | 45065 | 45863 | 58688 | 57600 | 44368 | 48747 | 43914 | 43840 | 46669 | 46649 | 51190 | 49546 | 52031 | 50497 | 42617 | 45011 | 51282 | 50741 | 57578 | 57117 | 48088 | 30901 | 49624 | 53453 | 50115 | 62819 | 57632 | 56048 | Rps14     |
| Rps15     | 25745 | 34127 | 30387 | 30535 | 23401 | 25549 | 25533 | 22304 | 26679 | 27731 | 28055 | 27381 | 29374 | 29890 | 24204 | 24857 | 30553 | 27533 | 29379 | 31713 | 27726 | 17985 | 27023 | 29786 | 27745 | 35524 | 32681 | 31506 | Rps15     |
| Rps15a    | 37171 | 33778 | 31452 | 33993 | 30202 | 29140 | 42390 | 36777 | 31045 | 32034 | 36304 | 31023 | 33318 | 42094 | 36646 | 27392 | 32321 | 33598 | 32289 | 37709 | 41830 | 26859 | 31051 | 34455 | 34799 | 37032 | 34443 | 45258 | Rps15a    |
| Rps16     | 28085 | 28149 | 24581 | 23323 | 17784 | 18194 | 20911 | 17456 | 19249 | 19488 | 20022 | 18750 | 19995 | 24126 | 19093 | 20508 | 24118 | 19788 | 20123 | 24238 | 21805 | 12472 | 19944 | 22248 | 18616 | 24978 | 22585 | 26107 | Rps16     |
| Rps17     | 28108 | 31881 | 31078 | 28321 | 23247 | 23357 | 29356 | 25415 | 26412 | 26102 | 28367 | 26561 | 29995 | 34496 | 27187 | 24585 | 29191 | 25222 | 27408 | 31753 | 28946 | 19519 | 26168 | 30000 | 26840 | 34748 | 32450 | 36844 | Rps17     |
| Rps18     | 29784 | 42057 | 35133 | 33188 | 27754 | 30348 | 30900 | 26848 | 32614 | 28947 | 32648 | 31805 | 34329 | 34285 | 28963 | 32083 | 33559 | 30422 | 34233 | 37987 | 30146 | 19954 | 33207 | 33508 | 30128 | 38414 | 37379 | 37244 | Rps18     |
| Rps18-ps5 | 899   | 1513  | 658   | 740   | 542   | 699   | 619   | 788   | 644   | 688   | 700   | 737   | 785   | 751   | 790   | 688   | 995   | 632   | 933   | 1009  | 628   | 480   | 673   | 811   | 687   | 784   | 831   | 802   | Rps18-ps5 |
| Rps18-ps6 | 100   | 207   | 70    | 62    | 41    | 32    | 69    | 90    | 58    | 84    | 73    | 66    | 48    | 80    | 102   | 58    | 108   | 53    | 79    | 60    | 71    | 52    | 53    | 87    | 70    | 61    | 66    | 77    | Rps18-ps6 |
| Rps19     | 20336 | 26184 | 25156 | 22626 | 19046 | 19138 | 23062 | 17778 | 21161 | 20046 | 22758 | 22573 | 23498 | 23504 | 19316 | 21016 | 23142 | 20854 | 22337 | 25310 | 21318 | 13207 | 21407 | 24657 | 21356 | 27541 | 25421 | 26608 | Rps19     |
| Rps19bp1  | 1385  | 1631  | 1457  | 1653  | 1330  | 1273  | 1458  | 1128  | 1077  | 1220  | 1158  | 1133  | 1134  | 1327  | 1305  | 1343  | 1542  | 1413  | 1457  | 1618  | 1465  | 1023  | 1088  | 1393  | 1259  | 1258  | 1237  | 1239  | Rps19bp1  |
| Rps2      | 49397 | 60245 | 63551 | 52179 | 41025 | 42484 | 40400 | 33273 | 40611 | 37467 | 40314 | 46879 | 46962 | 40272 | 45254 | 54247 | 53164 | 46992 | 48985 | 48514 | 40307 | 29245 | 41547 | 43968 | 38987 | 57900 | 51309 | 48184 | Rps2      |
| Rps20     | 17656 | 19955 | 16179 | 15885 | 13114 | 12882 | 18521 | 16745 | 16548 | 17701 | 17182 | 17958 | 22156 | 16663 | 15127 | 16312 | 14069 | 14394 | 17480 | 17757 | 12123 | 17037 | 18767 | 15484 | 19653 | 17903 | 23715 | Rps20 |           |
| Rps21     | 9781  | 11976 | 11640 | 13664 | 9757  | 7395  | 17442 | 9972  | 9052  | 14524 | 14067 | 10691 | 11513 | 12977 | 8645  | 6622  | 13196 | 9960  | 9854  | 11430 | 16421 | 6410  | 9148  | 16284 | 12660 | 13086 | 11329 | 21065 | Rps21     |
| Rps23     | 29899 | 31343 | 32308 | 30477 | 25089 | 22646 | 32964 | 28256 | 27779 | 31110 | 31064 | 30561 | 30874 | 22070 | 28393 | 25211 | 31076 | 26646 | 27562 | 33017 | 31840 | 21246 | 27594 | 34496 | 29182 | 37688 | 33128 | 43110 | Rps23     |
| Rps23r21  | 63    | 89    | 99    | 61    | 25    | 40    | 41    | 49    | 47    | 55    | 35    | 70    | 84    | 82    | 70    | 48    | 68    | 30    | 26    | 46    | 35    | 33    | 57    | 69    | 50    | 124   | 105   | 138   | Rps23r21  |
| Rps24     | 59158 | 55543 | 57866 | 54853 | 47463 | 50716 | 58069 | 54986 | 53359 | 50105 | 56926 | 53916 | 58857 | 61920 | 62122 | 54089 | 53850 | 51000 | 53220 | 67233 | 54357 | 44264 | 54298 | 55958 | 51851 | 64862 | 60022 | 65124 | Rps24     |
| Rps25     | 26366 | 26479 | 24209 | 23765 | 20215 | 20462 | 28052 | 25959 | 23550 | 21945 | 26876 | 22995 | 24891 | 29005 | 25581 | 20747 | 23720 | 21754 | 26315 | 27948 | 25707 | 19136 | 23746 | 27682 | 23981 | 28930 | 27380 | 32465 | Rps25     |
| Rps26     | 23458 | 27655 | 29689 | 29520 | 23078 | 22518 | 27028 | 21989 | 24401 | 27011 | 32182 | 25998 | 29423 | 31645 | 23194 | 21592 | 27954 | 26803 | 26239 | 29459 | 25674 | 17146 | 23934 | 30777 | 28657 | 33784 | 29440 | 32426 | Rps26     |
| Rps27     | 22780 | 22193 | 16670 | 19317 | 16393 | 12313 | 31021 | 23798 | 15769 | 21303 | 23067 | 16988 | 18604 | 39980 | 20367 | 7375  | 19087 | 16218 | 16364 | 18035 | 30775 | 12935 | 16905 | 25656 | 20996 | 19059 | 18095 | 36191 | Rps27     |
| Rps27a    | 27609 | 25287 | 26609 | 27126 | 21525 | 15258 | 30350 | 25203 | 26954 | 28126 | 27647 | 28759 | 25362 | 34098 | 22105 | 24680 | 26052 | 16088 | 23148 | 30010 | 27995 | 18698 | 28420 | 24997 | 17568 | 31891 | 12401 | 35318 | Rps27a    |
| Rps27f    | 5039  | 4274  | 5413  | 4843  | 3306  | 3258  | 5559  | 3938  | 3269  | 3530  | 3578  | 3791  | 3924  | 5459  | 4803  | 3544  | 4780  | 3856  | 3906  | 4509  | 5160  | 2526  | 3239  | 4572  | 3547  | 4632  | 4069  | 6041  | Rps27f    |
| Rps27r1   | 7199  | 6164  | 5694  | 8620  | 3887  | 3776  | 9386  | 6891  | 6663  | 5440  | 6438  | 4361  | 4373  | 8790  | 7483  | 7124  | 6951  | 4221  | 4173  | 4271  | 7117  | 7782  | 4907  | 6966  | 5218  | 4969  | 5269  | 10186 | Rps27r1   |
| Rps28     | 8611  | 11630 | 10991 | 11860 | 8527  | 6303  | 15003 | 8613  | 7743  | 12651 | 11294 | 9242  | 9260  | 27248 | 7949  | 5379  | 12100 | 8220  | 8364  | 9335  | 15985 | 6462  | 7833  | 15624 | 10663 | 11419 | 10565 | 20181 | Rps28     |
| Rps29     | 8154  | 11548 | 9610  | 12473 | 8885  | 6648  | 16290 | 9417  | 8740  | 14087 | 12647 | 11035 | 10739 | 27270 | 7618  | 5237  | 12227 | 8755  | 7833  | 10660 | 17088 | 6015  | 8770  | 18275 | 11989 | 12492 | 11488 | 23425 | Rps29     |
| Rps3      | 54612 | 56571 | 59402 | 53866 | 44705 | 46218 | 45590 | 49906 | 50355 | 47622 | 50776 | 51622 | 51058 | 51168 | 52830 | 54114 | 54647 | 49280 | 51176 | 58155 | 46586 | 35906 | 53942 | 54039 | 47310 | 63154 | 56128 | 56185 | Rps3      |
| Rps3a1    | 51938 | 47811 | 50512 | 42128 | 35664 | 37474 | 45587 | 48147 | 46854 | 42240 | 44765 | 44309 | 46560 | 50298 | 52878 | 50478 | 44086 | 40292 | 39894 | 51429 | 41493 | 36741 | 50375 | 45653 | 40990 | 55372 | 44758 | 55796 | Rps3a1    |
| Rps3a     | 74790 | 65361 | 63122 | 54240 | 46383 | 52020 | 58967 | 71938 | 66993 | 52310 | 56660 | 62562 | 60087 | 64894 | 75707 | 67574 | 55332 | 53764 | 53296 | 67100 | 55075 | 54719 | 66579 | 59954 | 54184 | 74960 | 64944 | 73076 | Rps3a     |
| Rps5      | 30847 | 39311 | 29445 | 28952 | 24826 | 26121 | 26703 | 27523 | 32646 | 28665 | 28691 | 28278 | 28791 | 27130 | 29727 | 32774 | 28828 | 26510 | 29562 | 33127 | 27694 | 21363 | 34070 | 29170 | 26901 | 33240 | 31502 | 31138 | Rps5      |
| Rps6      | 46822 | 46336 | 44693 | 38326 | 33552 | 35590 | 39409 | 44711 | 41154 | 35791 | 41566 | 40456 | 42200 | 44446 | 46252 | 42328 | 40387 | 35365 | 38143 | 42774 | 37533 | 34968 | 43610 | 40693 | 39280 | 48881 | 45198 | 49293 | Rps6      |
| Rps6ka1   | 3959  | 4574  | 5063  | 4656  | 3908  | 3672  | 3429  | 1156  | 1505  | 1496  | 1537  | 1643  | 1669  | 1288  | 3516  | 5302  | 4671  | 4614  | 4383  | 2993  | 3689  | 1430  | 1665  | 1653  | 1462  | 1940  | 1479  | 1584  | Rps6ka1   |
| Rps6ka2   | 6111  | 7070  | 6543  | 7341  | 7340  | 6842  | 6739  | 2938  | 3687  | 3537  | 3840  | 4564  | 4148  | 3949  | 6099  | 7345  | 7227  | 7507  | 7294  | 5240  | 6821  | 4214  | 3226  | 3524  | 4088  | 3566  | 3970  | 4047  | Rps6ka2   |
| Rps6ka3   | 15160 | 11365 | 11172 | 10989 | 12692 | 13594 | 13800 | 11162 | 10305 | 9189  | 10668 | 10252 | 11499 | 10580 | 14876 | 13921 | 10974 | 11700 | 11252 | 12817 | 13337 | 10066 | 9963  | 9050  | 9842  | 8159  | 10884 | 10681 | Rps6ka3   |
| Rps6ka5   | 2533  | 2219  | 1972  | 3023  | 3240  | 3320  | 3807  | 2159  | 2181  | 1911  | 1761  | 1729  | 1543  | 1864  | 2685  | 2245  | 2217  | 3168  | 3015  | 3180  | 3749  | 2177  | 1952  | 1705  | 2035  | 1379  | 1547  | 1613  | Rps6ka5   |
| Rps6ka6   | 2     | 2     | 1     | 0     | 4     | 2     | 2     | 1     | 1     | 0     | 2     | 7     | 2     | 1     | 1     | 0     | 1     | 2     | 3     | 1     | 3     | 2     | 0     | 1     | 0     | 9     | 1     | 1     | Rps6ka6   |
| Rps6kb1   | 8530  | 6155  | 6907  | 7282  | 6532  | 7343  | 7987  | 8606  | 7782  | 7588  | 8124  | 8200  | 8053  | 9008  | 8132  | 7691  | 6624  | 7162  | 6543  | 7313  | 7209  | 8006  | 7425  | 7691  | 8041  | 7993  | 8230  | 8737  | Rps6kb1   |
| Rps6kb2   | 370   | 543   | 112   | 1036  | 646   | 135   | 405   | 442   | 681   | 667   | 503   | 328   | 877   | 934   | 204   | 296   | 269   | 321   | 1005  | 386   | 139   | 413   | 214   | 581   | 466   | 332   | 593   | 240   | Rps6kb2   |
| Rps6kc1   | 2871  | 3252  | 2968  | 3384  | 3475  | 3146  | 3143  | 3132  | 3227  | 3216  | 3351  | 3115  | 3009  | 3371  | 2981  | 2897  | 3124  | 3235  | 3402  | 3249  | 3356  | 3240  | 3118  | 3454  | 3479  | 3022  | 3337  | 3269  | Rps6kc1   |
| Rps6kl1   | 490   | 741   | 559   | 922   | 1305  | 901   | 920   | 573   | 734   | 796   | 818   | 514   | 522   | 473   | 644   | 681   | 866   | 1115  | 1127  | 931   | 982   | 962   | 766   | 589   | 848   | 471   | 476   | 387   | Rps6kl1   |
| Rps7      | 27639 | 28175 | 25979 | 27623 | 23800 | 24726 | 29188 | 28325 | 30105 | 26158 | 27250 | 25328 | 27877 | 29668 | 27662 | 27024 | 27817 | 23830 | 27343 | 33871 | 29238 | 21345 | 31719 | 28417 | 26153 | 30799 | 28145 | 32287 | Rps7      |
| Rps8      | 35234 | 42732 | 41361 | 39470 | 33606 | 36545 | 37386 | 33904 | 38418 | 36630 | 41189 | 37366 | 4     |       |       |       |       |       |       |       |       |       |       |       |       |       |       |       |           |



|          |       |       |       |       |       |       |       |       |       |       |       |       |       |       |       |       |       |       |       |       |       |       |       |       |       |       |       |        |          |      |
|----------|-------|-------|-------|-------|-------|-------|-------|-------|-------|-------|-------|-------|-------|-------|-------|-------|-------|-------|-------|-------|-------|-------|-------|-------|-------|-------|-------|--------|----------|------|
| Rsbm11   | 3925  | 2844  | 3775  | 3980  | 4078  | 4036  | 4298  | 3729  | 2978  | 3429  | 3344  | 3737  | 3570  | 3698  | 3915  | 3234  | 3672  | 3927  | 3961  | 4093  | 4307  | 3456  | 2979  | 3349  | 3619  | 3297  | 3790  | 3827   | Rsbm11   |      |
| Rsf1     | 7251  | 6037  | 5821  | 6610  | 7571  | 8689  | 8472  | 11986 | 10064 | 9410  | 9615  | 9941  | 9639  | 10784 | 7615  | 6592  | 6167  | 6444  | 7376  | 9022  | 8476  | 9078  | 9616  | 8652  | 10517 | 8099  | 10161 | 9486   | Rsf1     |      |
| Rskr     | 159   | 162   | 151   | 141   | 130   | 130   | 153   | 71    | 58    | 59    | 67    | 63    | 75    | 72    | 125   | 103   | 177   | 168   | 178   | 161   | 155   | 65    | 56    | 69    | 51    | 79    | 65    | Rskr   |          |      |
| Rsl1     | 713   | 539   | 627   | 512   | 685   | 577   | 678   | 767   | 681   | 558   | 653   | 544   | 510   | 548   | 691   | 536   | 598   | 572   | 604   | 669   | 581   | 648   | 747   | 547   | 599   | 639   | 560   | 568    | Rsl1     |      |
| Rsl1d1   | 11219 | 9386  | 11043 | 8659  | 8242  | 9268  | 9947  | 11088 | 9579  | 9098  | 8808  | 11067 | 10584 | 10869 | 11418 | 10125 | 9707  | 8440  | 8935  | 11906 | 8888  | 8809  | 9586  | 9520  | 9610  | 12656 | 11441 | 11515  | Rsl1d1   |      |
| Rsl24d1  | 4099  | 3795  | 4313  | 3641  | 2734  | 2837  | 3399  | 2958  | 2683  | 2724  | 2636  | 3177  | 2914  | 3156  | 3870  | 3653  | 4018  | 3416  | 3156  | 3403  | 3088  | 2550  | 2733  | 3103  | 2879  | 3840  | 3029  | 3519   | Rsl24d1  |      |
| Rslcan18 | 32    | 17    | 24    | 18    | 19    | 21    | 25    | 27    | 25    | 34    | 22    | 30    | 31    | 19    | 21    | 31    | 23    | 11    | 30    | 16    | 21    | 12    | 11    | 13    | 26    | 20    | 48    | 23     | Rslcan18 |      |
| RspH1    | 128   | 229   | 162   | 240   | 229   | 232   | 196   | 133   | 128   | 131   | 139   | 153   | 192   | 118   | 240   | 219   | 242   | 196   | 171   | 224   | 181   | 135   | 224   | 112   | 111   | 122   | 121   | 131    | RspH1    |      |
| RspH10b  | 657   | 738   | 458   | 921   | 791   | 736   | 816   | 364   | 367   | 441   | 418   | 294   | 382   | 254   | 781   | 682   | 680   | 1007  | 774   | 732   | 853   | 461   | 414   | 266   | 336   | 186   | 230   | 193    | RspH10b  |      |
| RspH14   | 20    | 28    | 11    | 21    | 14    | 25    | 6     | 15    | 21    | 12    | 10    | 13    | 12    | 12    | 17    | 30    | 8     | 13    | 12    | 25    | 14    | 18    | 23    | 11    | 12    | 1     | 7     | RspH14 |          |      |
| RspH3a   | 1181  | 1302  | 1318  | 1297  | 1105  | 1077  | 1341  | 1174  | 988   | 1056  | 999   | 1099  | 1132  | 1345  | 1350  | 1079  | 1304  | 1179  | 1274  | 1168  | 1248  | 1168  | 1102  | 1147  | 1190  | 1135  | 1097  | 1137   | RspH3a   |      |
| RspH3b   | 813   | 829   | 885   | 819   | 691   | 757   | 767   | 670   | 629   | 647   | 603   | 651   | 567   | 643   | 803   | 693   | 812   | 728   | 859   | 727   | 780   | 725   | 725   | 647   | 609   | 707   | 703   | 694    | RspH3b   |      |
| RspH4a   | 262   | 304   | 211   | 227   | 319   | 282   | 315   | 151   | 182   | 156   | 123   | 220   | 237   | 144   | 303   | 327   | 236   | 326   | 291   | 337   | 323   | 237   | 382   | 151   | 110   | 103   | 91    | 116    | RspH4a   |      |
| RspH6a   | 2     | 13    | 12    | 16    | 4     | 15    | 7     | 2     | 0     | 0     | 1     | 1     | 2     | 8     | 9     | 6     | 13    | 4     | 2     | 8     | 2     | 0     | 1     | 2     | 3     | 3     | 1     | 1      | RspH6a   |      |
| RspH9    | 618   | 770   | 494   | 614   | 711   | 619   | 640   | 479   | 554   | 416   | 455   | 413   | 481   | 392   | 696   | 672   | 570   | 651   | 704   | 819   | 671   | 471   | 581   | 443   | 439   | 371   | 467   | 419    | RspH9    |      |
| Rspo1    | 820   | 1016  | 1320  | 765   | 402   | 554   | 469   | 634   | 545   | 702   | 548   | 1263  | 1254  | 1093  | 793   | 976   | 877   | 646   | 478   | 482   | 624   | 433   | 846   | 959   | 622   | 1748  | 1332  | 1659   | Rspo1    |      |
| Rspo2    | 1247  | 749   | 1436  | 788   | 657   | 637   | 906   | 1707  | 966   | 1128  | 1293  | 1882  | 1670  | 1949  | 895   | 1141  | 934   | 629   | 841   | 943   | 769   | 957   | 1675  | 1580  | 1177  | 3165  | 1978  | 2541   | Rspo2    |      |
| Rspo3    | 1562  | 970   | 1720  | 965   | 1078  | 1190  | 1368  | 2141  | 1636  | 1659  | 1568  | 2732  | 1989  | 2800  | 1571  | 1179  | 1307  | 866   | 1269  | 1695  | 1267  | 1900  | 2585  | 2146  | 2131  | 3603  | 2659  | 3420   | Rspo3    |      |
| Rspo4    | 21    | 29    | 11    | 18    | 21    | 26    | 11    | 12    | 16    | 21    | 16    | 2     | 17    | 4     | 26    | 36    | 14    | 8     | 16    | 12    | 11    | 10    | 25    | 10    | 5     | 3     | 1     | 7      | Rspo4    |      |
| Rspry1   | 6373  | 5511  | 5479  | 5484  | 5004  | 5425  | 5747  | 5464  | 4519  | 4249  | 4299  | 4552  | 4493  | 4808  | 6551  | 5558  | 5533  | 5382  | 5223  | 6190  | 5631  | 4720  | 4625  | 4350  | 4423  | 4828  | 4997  | 4723   | Rspry1   |      |
| Rsrc1    | 4870  | 4380  | 5164  | 3794  | 3826  | 4107  | 3967  | 5688  | 4490  | 4500  | 4300  | 5131  | 5050  | 5581  | 5004  | 4060  | 4244  | 3812  | 3743  | 4447  | 4073  | 4719  | 4815  | 4931  | 4752  | 5317  | 5875  | 5685   | Rsrc1    |      |
| Rsrc2    | 8433  | 7077  | 9623  | 9215  | 9291  | 8960  | 9544  | 16552 | 13303 | 14401 | 14559 | 14928 | 14705 | 16322 | 9655  | 7904  | 9635  | 8715  | 8956  | 10947 | 9298  | 14681 | 13570 | 15044 | 14923 | 15512 | 15931 | 15918  | Rsrc2    |      |
| Rsrp1    | 30910 | 24593 | 28735 | 35133 | 33490 | 32184 | 35119 | 30382 | 27811 | 32414 | 33267 | 31460 | 30670 | 32896 | 31275 | 26066 | 31081 | 33826 | 31392 | 30299 | 34520 | 36054 | 28657 | 32539 | 33920 | 31079 | 29530 | 30505  | Rsrp1    |      |
| Rsu1     | 3187  | 2856  | 2682  | 2043  | 1874  | 1988  | 1849  | 2380  | 2585  | 1929  | 2501  | 1808  | 2515  | 1993  | 3196  | 3041  | 2179  | 2178  | 1787  | 2238  | 1793  | 2194  | 2957  | 1947  | 1587  | 2359  | 2064  | 2117   | Rsu1     |      |
| Rtbdn    | 108   | 136   | 169   | 215   | 287   | 246   | 276   | 109   | 108   | 169   | 107   | 126   | 115   | 82    | 160   | 107   | 203   | 272   | 270   | 230   | 284   | 189   | 80    | 117   | 140   | 83    | 126   | 90     | Rtbdn    |      |
| Rtca     | 4693  | 4944  | 4548  | 4485  | 3933  | 4242  | 4832  | 3676  | 3227  | 3277  | 3012  | 3686  | 3405  | 3931  | 4975  | 4364  | 4339  | 4199  | 4191  | 4604  | 4379  | 3347  | 3103  | 3416  | 3233  | 4042  | 3858  | 4132   | Rtca     |      |
| Rtcb     | 15755 | 16825 | 15986 | 14546 | 13044 | 14286 | 13266 | 12511 | 12525 | 11318 | 11674 | 12488 | 12488 | 12191 | 11990 | 16105 | 15747 | 14732 | 13885 | 14114 | 15612 | 13174 | 10410 | 12508 | 12028 | 11714 | 14383 | 13675  | 12803    | Rtcb |
| Rtel1    | 3963  | 4282  | 3569  | 3420  | 3085  | 3527  | 3283  | 4593  | 4837  | 4376  | 4394  | 5447  | 5074  | 5079  | 3898  | 3777  | 3423  | 3055  | 3243  | 3523  | 3299  | 4380  | 4330  | 4537  | 4640  | 4820  | 5573  | 5385   | Rtel1    |      |
| Rtf1     | 14492 | 13303 | 15446 | 15653 | 14135 | 14642 | 15346 | 10386 | 9799  | 11219 | 10133 | 11957 | 10679 | 12005 | 13901 | 13537 | 14676 | 15113 | 14504 | 14327 | 14844 | 11375 | 9277  | 11551 | 11692 | 12328 | 11670 | 11765  | Rtf1     |      |
| Rtf2     | 5657  | 7329  | 5910  | 5934  | 4925  | 5251  | 5508  | 4239  | 4727  | 4414  | 4158  | 4901  | 4511  | 4706  | 5726  | 5808  | 5891  | 5748  | 5806  | 5843  | 5371  | 4162  | 4500  | 4689  | 4819  | 5271  | 5097  | 5088   | Rtf2     |      |
| Rtkn     | 1164  | 1472  | 1650  | 1032  | 891   | 1020  | 664   | 1630  | 2371  | 2115  | 2696  | 2323  | 2768  | 1967  | 1087  | 1408  | 1417  | 935   | 1001  | 812   | 744   | 2084  | 2233  | 2134  | 1652  | 2588  | 2568  | 2238   | Rtkn     |      |
| Rtkn2    | 1418  | 1446  | 1712  | 1349  | 954   | 1201  | 1338  | 1006  | 1010  | 1097  | 871   | 1840  | 1284  | 1905  | 1324  | 1209  | 1511  | 1155  | 1265  | 1191  | 1265  | 919   | 877   | 1346  | 1336  | 2010  | 1878  | 1811   | Rtkn2    |      |
| Rtl10    | 172   | 224   | 277   | 194   | 199   | 174   | 144   | 159   | 211   | 230   | 229   | 241   | 206   | 187   | 206   | 261   | 202   | 176   | 161   | 175   | 192   | 266   | 185   | 218   | 207   | 241   | 198   | 223    | Rtl10    |      |
| Rtl3     | 389   | 339   | 225   | 269   | 151   | 246   | 64    | 920   | 1444  | 1239  | 3322  | 539   | 638   | 576   | 385   | 460   | 309   | 377   | 72    | 69    | 48    | 1285  | 2402  | 1191  | 810   | 773   | 803   | 433    | Rtl3     |      |
| Rtl4     | 24    | 16    | 24    | 11    | 45    | 32    | 28    | 64    | 72    | 60    | 108   | 38    | 40    | 42    | 22    | 31    | 23    | 41    | 34    | 23    | 35    | 94    | 74    | 34    | 37    | 21    | 41    | 20     | Rtl4     |      |
| Rtl5     | 5019  | 5999  | 5093  | 6891  | 7263  | 7040  | 8136  | 6439  | 6054  | 6998  | 5762  | 8048  | 5532  | 8548  | 5090  | 4404  | 6960  | 6628  | 7874  | 7454  | 7977  | 7790  | 5352  | 7715  | 8650  | 8534  | 7631  | 7695   | Rtl5     |      |
| Rtl6     | 2806  | 3234  | 3623  | 4167  | 4643  | 4291  | 4005  | 4406  | 5572  | 6536  | 5649  | 6387  | 5525  | 5793  | 2901  | 2999  | 4215  | 4031  | 5075  | 3313  | 4195  | 6662  | 4989  | 6589  | 6817  | 6086  | 5617  | 5524   | Rtl6     |      |
| Rtl8a    | 0     | 1     | 0     | 0     | 0     | 0     | 2     | 2     | 0     | 0     | 1     | 0     | 0     | 0     | 0     | 2     | 1     | 0     | 0     | 0     | 0     | 0     | 3     | 0     | 1     | 0     | 0     | 0      | Rtl8a    |      |
| Rtl8b    | 6     | 1     | 0     | 2     | 2     | 3     | 1     | 4     | 2     | 2     | 4     | 1     | 1     | 0     | 0     | 1     | 1     | 3     | 1     | 0     | 4     | 0     | 6     | 2     | 3     | 1     | 5     | 0      | Rtl8b    |      |
| Rtl9     | 175   | 166   | 83    | 185   | 120   | 141   | 166   | 117   | 193   | 156   | 209   | 102   | 126   | 106   | 173   | 146   | 98    | 150   | 168   | 141   | 150   | 140   | 173   | 109   | 119   | 88    | 128   | 70     | Rtl9     |      |
| Rtn1     | 8543  | 10000 | 9009  | 17663 | 28079 | 20039 | 23373 | 22674 | 22352 | 30624 | 24011 | 21403 | 20882 | 23274 | 12262 | 8816  | 14776 | 19876 | 22040 | 19653 | 24908 | 16270 | 21892 | 25396 | 31032 | 16977 | 16747 | 19939  | Rtn1     |      |
| Rtn2     | 2481  | 3669  | 3699  | 4255  | 4320  | 3698  | 3831  | 2961  | 3188  | 3912  | 3040  | 3801  | 2959  | 3362  | 2633  | 2626  | 4146  | 3996  | 4826  | 3322  | 4191  | 4288  | 3010  | 3679  | 4312  | 3504  | 3447  | 3211   | Rtn2     |      |
| Rtn3     | 38738 | 38852 | 39904 | 44850 | 48201 | 43468 | 51561 | 47887 | 37388 | 41535 | 37439 | 44778 | 43095 | 48103 | 44978 | 32909 | 42789 | 44636 | 46014 | 48825 | 48826 | 51521 | 35819 | 43285 | 47361 | 41539 | 47109 | 47680  | Rtn3     |      |
| Rtn4     | 19954 | 16028 | 22528 | 22437 | 27747 | 23974 | 25999 | 39796 | 33765 | 38265 | 36906 | 38282 | 34607 | 40669 | 21592 | 17728 | 22265 | 22742 | 24476 | 21145 | 26118 | 45761 | 33456 | 38227 | 42186 | 36083 | 36660 | 37855  | Rtn4     |      |
| Rtn4ip1  | 929   | 919   | 1033  | 920   | 917   | 869   | 934   | 985   | 1103  | 956   | 976   | 1168  | 1038  | 1064  | 1000  | 917   | 944   | 916   | 959   | 894   | 926   | 946   | 977   | 996   | 1127  | 1148  | 1109  | 1081   | Rtn4ip1  |      |
| Rtn4r1   | 496   | 523   | 568   | 572   | 867   | 626   | 529   | 479   | 549   | 597   | 578   | 412   | 519   | 433   | 430   | 601   | 654   | 672   | 754   | 504   | 641   | 777   | 603   | 550   | 689   | 172   | 397   | 450    | Rtn4r1   |      |
| Rtn4r2   | 454   | 691   | 646   | 778   | 715   | 615   | 477   | 299   | 337   | 339   | 369   | 289   | 270   | 243   | 442   | 529   | 765   | 694   | 839   | 596   | 561   | 326   | 287   | 413   | 414   | 334   | 222   | 198    | Rtn4r2   |      |
| Rtp1     | 36    | 16    | 8     | 25    | 8     | 12    | 8     | 143   | 75    | 182   | 77    | 28    | 50    | 29    | 22    | 22    | 10    | 1     | 6     | 5     | 9     | 3     | 138   | 212   | 15    | 155   | 2     | 23     | Rtp1     |      |
| Rtp2     | 24    | 12    | 0     | 31    | 2     | 0     | 2     | 57    | 60    |       |       |       |       |       |       |       |       |       |       |       |       |       |       |       |       |       |       |        |          |      |



|        |       |       |       |       |       |       |       |       |       |       |       |       |       |       |       |       |       |       |       |       |       |       |       |       |       |       |       |       |        |
|--------|-------|-------|-------|-------|-------|-------|-------|-------|-------|-------|-------|-------|-------|-------|-------|-------|-------|-------|-------|-------|-------|-------|-------|-------|-------|-------|-------|-------|--------|
| Sarm1  | 2015  | 2855  | 2521  | 3493  | 4606  | 3471  | 3850  | 2466  | 2738  | 3374  | 2592  | 3051  | 2595  | 3003  | 2441  | 2156  | 3639  | 3672  | 4547  | 3393  | 4060  | 4157  | 2407  | 3231  | 3979  | 2219  | 2537  | 2830  | Sarm1  |
| Sarnp  | 3245  | 2833  | 4213  | 3891  | 2872  | 2936  | 2663  | 2958  | 3066  | 3318  | 1556  | 2952  | 3480  | 3722  | 3343  | 3105  | 1826  | 2810  | 3451  | 3452  | 3558  | 2637  | 3133  | 4117  | 3325  | 4567  | 4106  | 3421  | Sarnp  |
| Sars   | 13654 | 16164 | 15005 | 15710 | 14470 | 14663 | 14081 | 11554 | 11399 | 11911 | 10862 | 12620 | 12177 | 13123 | 14186 | 12993 | 15137 | 13764 | 16346 | 15648 | 15731 | 11317 | 11596 | 12421 | 13248 | 13828 | 13529 | 13624 | Sars   |
| Sars2  | 403   | 548   | 598   | 429   | 434   | 446   | 327   | 850   | 1103  | 1078  | 1085  | 1361  | 1311  | 1277  | 385   | 478   | 531   | 403   | 497   | 460   | 392   | 969   | 1002  | 1198  | 1013  | 1603  | 1261  | 1265  | Sars2  |
| Sart1  | 505   | 7335  | 10419 | 9216  | 7340  | 6976  | 7354  | 5003  | 5904  | 7509  | 6904  | 8592  | 7042  | 8291  | 5752  | 6548  | 10102 | 8176  | 8458  | 6127  | 7438  | 6395  | 5559  | 8539  | 7583  | 9468  | 7453  | 8326  | Sart1  |
| Sart3  | 6392  | 7413  | 8668  | 8471  | 7321  | 7044  | 6778  | 6173  | 6757  | 7827  | 7130  | 9385  | 7837  | 8185  | 5827  | 6695  | 8568  | 7844  | 8344  | 6160  | 7097  | 6998  | 6273  | 8983  | 8311  | 9695  | 8459  | 8624  | Sart3  |
| Sash1  | 3970  | 4000  | 4721  | 4753  | 4021  | 4255  | 3750  | 3127  | 3408  | 3653  | 4434  | 3638  | 3976  | 3406  | 3686  | 4674  | 4430  | 4590  | 4105  | 3162  | 3956  | 3584  | 4011  | 3543  | 3476  | 2682  | 3403  | 3482  | Sash1  |
| Sash3  | 66    | 54    | 64    | 29    | 37    | 37    | 20    | 83    | 101   | 63    | 88    | 80    | 75    | 50    | 38    | 51    | 35    | 28    | 25    | 40    | 34    | 77    | 170   | 61    | 75    | 96    | 74    | 69    | Sash3  |
| Sass6  | 2978  | 2494  | 2710  | 2622  | 2756  | 2843  | 3076  | 2880  | 2553  | 2536  | 2482  | 3330  | 3244  | 3450  | 3032  | 2611  | 2738  | 2487  | 2734  | 3024  | 3023  | 2398  | 2258  | 2803  | 2677  | 3227  | 3477  | 3588  | Sass6  |
| Sat1   | 2639  | 2483  | 2808  | 2408  | 2401  | 2408  | 2286  | 2240  | 1965  | 1918  | 2059  | 1789  | 1814  | 1887  | 3022  | 2850  | 2296  | 2340  | 2374  | 2951  | 2246  | 1736  | 2283  | 1914  | 1668  | 2199  | 1840  | 2000  | Sat1   |
| Sat2   | 842   | 872   | 823   | 764   | 641   | 868   | 771   | 554   | 547   | 582   | 559   | 565   | 599   | 569   | 997   | 835   | 743   | 748   | 714   | 824   | 780   | 541   | 555   | 540   | 581   | 561   | 623   | 592   | Sat2   |
| Satb1  | 4848  | 3949  | 5517  | 5491  | 6275  | 5759  | 6473  | 5084  | 4777  | 5735  | 5284  | 6642  | 5664  | 7017  | 4847  | 4231  | 6204  | 5468  | 5999  | 4890  | 6134  | 6417  | 4493  | 6508  | 6420  | 5846  | 5705  | 6497  | Satb1  |
| Satb2  | 660   | 580   | 807   | 1029  | 956   | 882   | 1040  | 972   | 1065  | 1103  | 966   | 716   | 677   | 784   | 518   | 567   | 773   | 976   | 1029  | 667   | 1032  | 745   | 749   | 1183  | 1345  | 679   | 669   | 725   | Satb2  |
| Sav1   | 5723  | 4687  | 5947  | 5652  | 4930  | 5082  | 5331  | 3990  | 3687  | 4130  | 4626  | 4567  | 4350  | 4699  | 5180  | 4904  | 5686  | 5504  | 4934  | 4261  | 5482  | 4131  | 3961  | 4485  | 4228  | 5224  | 4124  | 5110  | Sav1   |
| Saxo1  | 1     | 3     | 0     | 0     | 0     | 0     | 0     | 0     | 2     | 0     | 6     | 8     | 1     | 0     | 1     | 0     | 0     | 0     | 0     | 2     | 0     | 0     | 4     | 0     | 0     | 2     | 0     | 0     | Saxo1  |
| Saxo2  | 404   | 304   | 321   | 326   | 332   | 353   | 361   | 335   | 283   | 301   | 206   | 251   | 265   | 191   | 398   | 452   | 279   | 305   | 252   | 325   | 368   | 314   | 354   | 173   | 230   | 217   | 167   | 211   | Saxo2  |
| Saysd1 | 221   | 283   | 238   | 297   | 320   | 307   | 322   | 473   | 475   | 437   | 490   | 420   | 418   | 441   | 222   | 207   | 279   | 264   | 335   | 312   | 298   | 481   | 417   | 489   | 473   | 487   | 406   | 434   | Saysd1 |
| Sbds   | 2699  | 3196  | 3237  | 3008  | 2703  | 2701  | 2737  | 2347  | 2405  | 2340  | 2227  | 2593  | 2376  | 2653  | 2794  | 2787  | 3115  | 2775  | 2858  | 3088  | 2573  | 2112  | 2272  | 2415  | 2344  | 2871  | 2561  | 2861  | Sbds   |
| Sbf1   | 11246 | 15073 | 15030 | 18086 | 16400 | 15395 | 14267 | 7651  | 9279  | 10155 | 9860  | 11387 | 9403  | 9517  | 10952 | 12996 | 16766 | 17601 | 18223 | 12162 | 15427 | 10444 | 8424  | 10242 | 11189 | 9070  | 9735  | 9113  | Sbf1   |
| Sbf2   | 11851 | 12126 | 7423  | 9700  | 11739 | 12496 | 12409 | 15428 | 13960 | 12683 | 11456 | 13134 | 11668 | 12739 | 11892 | 10140 | 9090  | 10462 | 10925 | 13262 | 12735 | 12521 | 12747 | 11074 | 13901 | 7669  | 12740 | 11521 | Sbf2   |
| Sbk1   | 24410 | 29400 | 30769 | 39757 | 46327 | 38837 | 36998 | 36395 | 39391 | 50041 | 39994 | 49822 | 38865 | 44446 | 25669 | 23883 | 38683 | 39741 | 46791 | 35847 | 40632 | 52119 | 34429 | 50617 | 55381 | 45913 | 38652 | 41425 | Sbk1   |
| Sbk2   | 9     | 2     | 0     | 3     | 2     | 2     | 3     | 9     | 7     | 8     | 11    | 1     | 6     | 2     | 4     | 3     | 3     | 2     | 5     | 5     | 4     | 2     | 7     | 1     | 6     | 0     | 1     | 0     | Sbk2   |
| Sbk3   | 80    | 117   | 84    | 220   | 242   | 236   | 256   | 53    | 49    | 93    | 70    | 54    | 35    | 65    | 83    | 73    | 180   | 265   | 250   | 180   | 216   | 97    | 60    | 59    | 74    | 39    | 24    | 47    | Sbk3   |
| Sbno1  | 17901 | 16857 | 13270 | 16414 | 15037 | 16297 | 17429 | 17520 | 15087 | 14546 | 15341 | 15865 | 15517 | 16639 | 17762 | 16454 | 14655 | 16403 | 14825 | 17237 | 17503 | 15695 | 14688 | 13992 | 16392 | 11800 | 16823 | 15875 | Sbno1  |
| Sbno2  | 933   | 911   | 1123  | 925   | 1183  | 962   | 808   | 1608  | 2148  | 2200  | 1964  | 2404  | 2206  | 1865  | 749   | 918   | 1099  | 913   | 1165  | 812   | 809   | 2246  | 1980  | 2194  | 2269  | 2094  | 1897  | 1969  | Sbno2  |
| Sbp    | 0     | 0     | 0     | 0     | 2     | 0     | 0     | 0     | 0     | 0     | 0     | 0     | 0     | 0     | 0     | 0     | 0     | 0     | 2     | 0     | 0     | 0     | 0     | 0     | 0     | 0     | 0     | 1     | Sbp    |
| Sbpl   | 0     | 0     | 0     | 0     | 0     | 0     | 0     | 0     | 0     | 0     | 3     | 0     | 0     | 0     | 0     | 0     | 0     | 0     | 0     | 0     | 0     | 0     | 0     | 0     | 0     | 0     | 0     | 0     | Sbpl   |
| Sbsn   | 600   | 667   | 972   | 1017  | 1019  | 864   | 948   | 600   | 637   | 758   | 825   | 740   | 759   | 937   | 611   | 553   | 1132  | 1011  | 1057  | 758   | 961   | 822   | 601   | 914   | 949   | 710   | 757   | 845   | Sbsn   |
| Sbspon | 37    | 43    | 6     | 27    | 14    | 68    | 8     | 73    | 148   | 76    | 105   | 34    | 64    | 40    | 47    | 33    | 32    | 37    | 9     | 3     | 12    | 55    | 126   | 57    | 37    | 29    | 46    | 43    | Sbspon |
| Sc5d   | 9356  | 9042  | 9355  | 9327  | 8512  | 9217  | 9836  | 5763  | 5019  | 5150  | 5023  | 5564  | 5853  | 6499  | 9703  | 9658  | 8776  | 9421  | 8506  | 9511  | 9297  | 5574  | 4925  | 5167  | 5704  | 5204  | 6316  | 6258  | Sc5d   |
| Scaf1  | 7794  | 9628  | 12141 | 11897 | 11817 | 10119 | 8532  | 8521  | 10363 | 12992 | 11896 | 13700 | 11543 | 11249 | 7059  | 8469  | 12419 | 11253 | 12908 | 8143  | 9719  | 12355 | 9862  | 13512 | 12847 | 14454 | 11755 | 10773 | Scaf1  |
| Scaf11 | 12480 | 10464 | 10707 | 10873 | 11427 | 11895 | 11887 | 12058 | 11707 | 11661 | 12355 | 13768 | 13086 | 13689 | 12144 | 11249 | 11012 | 10633 | 10852 | 10895 | 11652 | 10243 | 11507 | 11782 | 11275 | 11854 | 13909 | 13494 | Scaf11 |
| Scaf4  | 5496  | 6272  | 6913  | 7443  | 6958  | 6567  | 6773  | 4267  | 4341  | 5052  | 4813  | 6236  | 5051  | 5934  | 5359  | 5979  | 7380  | 7231  | 7310  | 5722  | 7057  | 5073  | 3897  | 5519  | 5463  | 5477  | 5497  | 5503  | Scaf4  |
| Scaf8  | 4855  | 4106  | 4658  | 4665  | 5174  | 4835  | 5411  | 6979  | 6714  | 6754  | 6314  | 7169  | 6473  | 7421  | 4644  | 4277  | 4655  | 4540  | 5097  | 4194  | 5242  | 7033  | 6214  | 6758  | 6728  | 6251  | 6396  | 7392  | Scaf8  |
| Scal   | 8742  | 5827  | 4500  | 7268  | 7824  | 9682  | 9484  | 12658 | 10760 | 8080  | 10359 | 8566  | 8997  | 9290  | 8672  | 7906  | 5442  | 7211  | 5996  | 9488  | 9801  | 9207  | 10409 | 7702  | 9768  | 5907  | 9081  | 8109  | Scal   |
| Scamp1 | 8418  | 7021  | 8337  | 9875  | 11581 | 10294 | 11061 | 8683  | 7442  | 8090  | 7455  | 6657  | 6867  | 6710  | 9079  | 8011  | 8902  | 10329 | 10459 | 10684 | 10596 | 10225 | 7547  | 7883  | 8743  | 5761  | 5999  | 6057  | Scamp1 |
| Scamp2 | 2237  | 2526  | 2321  | 2131  | 2055  | 2244  | 2077  | 2805  | 2951  | 2916  | 3058  | 3137  | 3221  | 3115  | 2184  | 2334  | 2286  | 2100  | 2138  | 2074  | 2074  | 3018  | 3125  | 2850  | 3033  | 3086  | 3248  | 3237  | Scamp2 |
| Scamp3 | 2308  | 2852  | 2854  | 2778  | 2774  | 2652  | 2459  | 1984  | 2631  | 2644  | 2723  | 2807  | 2789  | 2401  | 2279  | 2424  | 2958  | 2849  | 2858  | 2596  | 2479  | 2633  | 2557  | 2806  | 2757  | 2858  | 2676  | 2409  | Scamp3 |
| Scamp4 | 24    | 12    | 16    | 32    | 17    | 14    | 17    | 17    | 19    | 16    | 13    | 22    | 20    | 27    | 17    | 17    | 35    | 22    | 27    | 24    | 31    | 25    | 20    | 26    | 26    | 26    | 13    | 32    | Scamp4 |
| Scamp5 | 4798  | 5537  | 5245  | 6881  | 8587  | 8057  | 7582  | 6185  | 6292  | 6777  | 5848  | 6417  | 5610  | 5880  | 5248  | 4628  | 6224  | 7379  | 8171  | 7018  | 7797  | 8380  | 5722  | 6357  | 7845  | 4692  | 5858  | 5592  | Scamp5 |
| Scand1 | 989   | 1219  | 1066  | 1228  | 1249  | 1207  | 835   | 1421  | 1340  | 1562  | 1473  | 1496  | 1523  | 1140  | 886   | 846   | 1307  | 1095  | 1474  | 1187  | 903   | 1496  | 1367  | 1695  | 1574  | 1277  | 1519  | 1201  | Scand1 |
| Scap   | 4382  | 5624  | 5338  | 6093  | 5447  | 5036  | 4892  | 3535  | 4394  | 4588  | 4481  | 4596  | 4090  | 3965  | 4122  | 4998  | 5530  | 6124  | 5726  | 4575  | 5068  | 4436  | 4297  | 4689  | 4636  | 4886  | 4105  | 4044  | Scap   |
| Scaper | 2616  | 2425  | 1839  | 2724  | 3708  | 3754  | 3771  | 6135  | 5337  | 5176  | 4899  | 4119  | 4273  | 4528  | 3385  | 2547  | 2186  | 3108  | 3223  | 4048  | 3812  | 6311  | 5465  | 4456  | 5733  | 3179  | 4195  | 3925  | Scaper |
| Scara3 | 647   | 441   | 476   | 405   | 418   | 555   | 337   | 1282  | 1870  | 1432  | 1937  | 1127  | 1229  | 1018  | 537   | 604   | 433   | 532   | 337   | 306   | 279   | 1145  | 2124  | 1381  | 1030  | 1710  | 1166  | 1057  | Scara3 |
| Scara5 | 286   | 304   | 449   | 269   | 115   | 277   | 79    | 404   | 557   | 578   | 1180  | 470   | 545   | 493   | 310   | 369   | 282   | 296   | 67    | 126   | 94    | 439   | 1450  | 506   | 370   | 537   | 562   | 453   | Scara5 |
| Scarb1 | 4309  | 5147  | 5109  | 4988  | 3776  | 4166  | 3765  | 1375  | 1790  | 1762  | 1940  | 1836  | 1850  | 1678  | 3907  | 5116  | 4880  | 5218  | 4382  | 3248  | 3949  | 1836  | 1927  | 1929  | 1758  | 2277  | 1858  | 1849  | Scarb1 |
| Scarb2 | 9069  | 8096  | 8378  | 10126 | 12183 | 11268 | 11990 | 13953 | 11966 | 12831 | 12246 | 12217 | 11005 | 12997 | 9932  | 7763  | 9093  | 10106 | 11217 | 11828 | 12020 | 13851 | 11343 | 12530 | 14245 | 11039 | 11824 | 12182 | Scarb2 |
| Scarf1 | 218   | 339   | 262   | 276   | 287   | 230   | 204   | 275   | 329   | 353   | 368   | 404   |       |       |       |       |       |       |       |       |       |       |       |       |       |       |       |       |        |

|        |       |       |       |       |       |       |       |       |       |       |       |       |       |       |       |       |       |       |       |       |       |       |       |       |       |       |       |       |        |        |
|--------|-------|-------|-------|-------|-------|-------|-------|-------|-------|-------|-------|-------|-------|-------|-------|-------|-------|-------|-------|-------|-------|-------|-------|-------|-------|-------|-------|-------|--------|--------|
| Scn2a  | 1404  | 1475  | 1006  | 1919  | 3634  | 3112  | 3046  | 4030  | 3302  | 3466  | 3079  | 1975  | 2311  | 2358  | 2259  | 1388  | 1590  | 2243  | 2553  | 3294  | 3195  | 3853  | 3166  | 2228  | 3452  | 1007  | 2119  | 1928  | Scn2a  |        |
| Scn2b  | 458   | 518   | 933   | 718   | 939   | 620   | 695   | 843   | 852   | 1122  | 1213  | 760   | 982   | 885   | 455   | 563   | 927   | 768   | 802   | 656   | 816   | 1183  | 948   | 996   | 1092  | 804   | 868   | 908   | Scn2b  |        |
| Scn3a  | 4567  | 4424  | 2743  | 5136  | 7983  | 7811  | 7483  | 15404 | 11873 | 10711 | 10379 | 10554 | 10552 | 11034 | 6360  | 4102  | 3950  | 5379  | 6502  | 8740  | 7918  | 13540 | 10897 | 8641  | 13051 | 4981  | 11089 | 9770  | Scn3a  |        |
| Scn3b  | 5121  | 5823  | 3896  | 8271  | 13920 | 11058 | 11931 | 9166  | 8029  | 8413  | 7757  | 5009  | 5214  | 5247  | 7697  | 4647  | 6181  | 9698  | 10880 | 12072 | 12399 | 11643 | 7695  | 5678  | 8575  | 3168  | 4272  | 4377  | Scn3b  |        |
| Scn4a  | 32    | 34    | 36    | 37    | 12    | 3     | 20    | 16    | 18    | 7     | 115   | 10    | 15    | 15    | 17    | 30    | 37    | 56    | 16    | 6     | 22    | 20    | 75    | 7     | 19    | 13    | 20    | 15    | Scn4a  |        |
| Scn4b  | 83    | 73    | 64    | 46    | 52    | 42    | 42    | 51    | 38    | 63    | 50    | 80    | 78    | 76    | 57    | 72    | 50    | 33    | 48    | 55    | 58    | 37    | 66    | 83    | 58    | 92    | 83    | 75    | Scn4b  |        |
| Scn5a  | 1488  | 1541  | 1425  | 1911  | 1440  | 1264  | 1713  | 509   | 663   | 625   | 585   | 911   | 797   | 827   | 1098  | 1233  | 1737  | 1585  | 1721  | 1414  | 1348  | 485   | 360   | 789   | 607   | 932   | 608   | 769   | Scn5a  |        |
| Scn7a  | 165   | 157   | 55    | 30    | 555   | 55    | 18    | 607   | 676   | 381   | 721   | 60    | 344   | 35    | 413   | 364   | 86    | 237   | 53    | 63    | 37    | 830   | 484   | 30    | 340   | 7     | 71    | 34    | Scn7a  |        |
| Scn8a  | 3715  | 4263  | 3457  | 5256  | 6631  | 6182  | 5880  | 4352  | 4388  | 5604  | 4606  | 5217  | 4614  | 5174  | 4025  | 3937  | 4692  | 5410  | 6007  | 4927  | 6408  | 5464  | 3671  | 4767  | 6068  | 3098  | 5340  | 4675  | Scn8a  |        |
| Scn9a  | 1610  | 1378  | 450   | 836   | 2993  | 1220  | 983   | 4885  | 4624  | 2957  | 3930  | 944   | 3256  | 989   | 2533  | 2867  | 830   | 1459  | 890   | 1273  | 1090  | 4737  | 2955  | 1107  | 2729  | 656   | 1110  | 794   | Scn9a  |        |
| Scnm1  | 1908  | 1973  | 2369  | 2165  | 1813  | 2014  | 1929  | 2676  | 2447  | 2979  | 2520  | 2877  | 2583  | 3078  | 1960  | 1709  | 2453  | 1929  | 2276  | 2393  | 2036  | 2336  | 2513  | 3000  | 2779  | 3129  | 2988  | 3067  | Scnm1  |        |
| Scnn1a | 60    | 42    | 39    | 49    | 31    | 38    | 19    | 71    | 105   | 83    | 86    | 51    | 66    | 49    | 47    | 51    | 58    | 37    | 33    | 26    | 37    | 97    | 83    | 80    | 54    | 80    | 65    | 62    | Scnn1a |        |
| Scnn1b | 14    | 15    | 2     | 2     | 3     | 4     | 2     | 5     | 7     | 5     | 5     | 0     | 0     | 10    | 1     | 9     | 7     | 1     | 6     | 1     | 1     | 12    | 11    | 6     | 8     | 13    | 0     | 2     | Scnn1b |        |
| Scnn1g | 28    | 14    | 3     | 0     | 2     | 0     | 0     | 9     | 26    | 2     | 2     | 2     | 7     | 4     | 12    | 24    | 1     | 6     | 0     | 0     | 3     | 2     | 18    | 6     | 2     | 4     | 2     | 2     | Scnn1g |        |
| Sco1   | 1563  | 1515  | 1596  | 1507  | 1235  | 1495  | 1484  | 1254  | 1155  | 1075  | 1269  | 1313  | 1195  | 1315  | 1622  | 1561  | 1435  | 1456  | 1396  | 1413  | 1354  | 1190  | 1184  | 1178  | 1118  | 1418  | 1455  | 1466  | Sco1   |        |
| Sco2   | 13    | 10    | 12    | 24    | 11    | 3     | 7     | 34    | 23    | 44    | 35    | 26    | 24    | 29    | 9     | 2     | 14    | 8     | 9     | 14    | 12    | 38    | 28    | 42    | 18    | 29    | 30    | 47    | Sco2   |        |
| Scoc   | 6987  | 5897  | 7087  | 7118  | 6870  | 6881  | 8375  | 7731  | 6512  | 5818  | 6195  | 6414  | 6910  | 7550  | 8004  | 7185  | 6614  | 7273  | 6936  | 7941  | 7381  | 7123  | 6138  | 6286  | 6557  | 6656  | 6994  | 7190  | Scoc   |        |
| Scp2   | 6216  | 5532  | 6710  | 5615  | 5193  | 5175  | 6478  | 6483  | 5529  | 4724  | 4986  | 5779  | 5593  | 6278  | 7259  | 5910  | 6182  | 5407  | 5644  | 7007  | 5778  | 5243  | 5721  | 5503  | 5304  | 6609  | 6352  | 6687  | Scp2   |        |
| Scp2d1 | 0     | 0     | 0     | 0     | 0     | 0     | 0     | 0     | 0     | 0     | 0     | 0     | 0     | 0     | 0     | 0     | 0     | 0     | 4     | 0     | 0     | 0     | 0     | 0     | 0     | 0     | 0     | 0     | 0      | Scp2d1 |
| Scpep1 | 4148  | 3924  | 4459  | 3244  | 2826  | 2953  | 2775  | 2378  | 2518  | 2198  | 2573  | 2566  | 2782  | 2533  | 3787  | 4166  | 4016  | 3342  | 3068  | 3138  | 2670  | 2186  | 2725  | 2530  | 2183  | 3457  | 3091  | 2686  | Scpep1 |        |
| Scrg1  | 13    | 5     | 7     | 13    | 11    | 12    | 15    | 33    | 39    | 35    | 63    | 9     | 14    | 7     | 18    | 14    | 6     | 12    | 9     | 25    | 32    | 63    | 34    | 35    | 29    | 32    | 15    | 1     | Scrg1  |        |
| Scrb   | 9325  | 13381 | 15721 | 15095 | 13192 | 12263 | 10934 | 7838  | 9322  | 10616 | 10057 | 13579 | 10917 | 11934 | 9274  | 11894 | 15574 | 14224 | 14767 | 10203 | 11995 | 10532 | 8398  | 12410 | 11434 | 13097 | 11884 | 12269 | Scrb   |        |
| Scrn1  | 13399 | 14692 | 11195 | 15361 | 17117 | 16624 | 18633 | 13319 | 13659 | 13573 | 10510 | 15083 | 11742 | 15616 | 14569 | 11210 | 14465 | 15449 | 18466 | 16645 | 19050 | 13067 | 10120 | 13571 | 16088 | 13303 | 13466 | 13795 | Scrn1  |        |
| Scrn2  | 599   | 660   | 717   | 496   | 442   | 489   | 403   | 744   | 818   | 785   | 786   | 1060  | 1016  | 885   | 513   | 595   | 644   | 490   | 605   | 536   | 390   | 570   | 838   | 865   | 829   | 1183  | 1191  | 990   | Scrn2  |        |
| Scrn3  | 443   | 371   | 421   | 425   | 387   | 438   | 553   | 950   | 841   | 760   | 836   | 873   | 845   | 930   | 504   | 396   | 411   | 430   | 391   | 487   | 433   | 765   | 950   | 840   | 670   | 1001  | 869   | 890   | Scrn3  |        |
| Scrt1  | 1197  | 1933  | 2424  | 3113  | 4060  | 2913  | 2516  | 3722  | 3642  | 6315  | 4887  | 6204  | 5801  | 6066  | 1539  | 1284  | 3296  | 2950  | 4058  | 2346  | 3083  | 7113  | 3379  | 6129  | 7023  | 4990  | 5054  | 5237  | Scrt1  |        |
| Scrt2  | 915   | 1438  | 1667  | 2045  | 3584  | 2230  | 2000  | 4280  | 4384  | 6483  | 5078  | 6156  | 6338  | 6075  | 1625  | 1250  | 2516  | 2020  | 2853  | 1735  | 2246  | 6691  | 3726  | 6338  | 6896  | 5135  | 4637  | 5479  | Scrt2  |        |
| Sct    | 12    | 19    | 17    | 18    | 16    | 11    | 8     | 6     | 15    | 8     | 20    | 11    | 18    | 9     | 12    | 19    | 8     | 10    | 9     | 9     | 8     | 10    | 20    | 15    | 3     | 17    | 1     | 9     | Sct    |        |
| Sctr   | 46    | 75    | 58    | 33    | 87    | 65    | 63    | 61    | 65    | 57    | 90    | 97    | 125   | 81    | 53    | 67    | 37    | 53    | 89    | 65    | 62    | 90    | 97    | 74    | 88    | 70    | 92    | 70    | Sctr   |        |
| Scube1 | 5832  | 6855  | 6951  | 6329  | 6115  | 5356  | 4452  | 2947  | 3583  | 4339  | 4864  | 4312  | 4998  | 3683  | 4909  | 7870  | 6313  | 5744  | 5797  | 4480  | 4480  | 3982  | 3100  | 4181  | 3650  | 3714  | 4266  | 3763  | Scube1 |        |
| Scube2 | 151   | 238   | 238   | 129   | 135   | 225   | 134   | 231   | 238   | 156   | 368   | 226   | 263   | 200   | 216   | 241   | 210   | 207   | 218   | 185   | 154   | 212   | 279   | 212   | 218   | 148   | 244   | 280   | Scube2 |        |
| Scube3 | 4395  | 5461  | 7414  | 4093  | 3738  | 4464  | 2847  | 5083  | 5924  | 7184  | 6786  | 7688  | 8043  | 7259  | 4378  | 5772  | 5704  | 4278  | 3785  | 3209  | 3080  | 7600  | 5447  | 7709  | 6546  | 6989  | 7587  | 8088  | Scube3 |        |
| Scx    | 59    | 59    | 34    | 45    | 45    | 28    | 27    | 154   | 235   | 211   | 434   | 79    | 175   | 55    | 63    | 65    | 63    | 36    | 39    | 15    | 22    | 177   | 287   | 122   | 107   | 221   | 88    | 76    | Scx    |        |
| Scyl1  | 3915  | 5054  | 4471  | 5016  | 4553  | 4373  | 4142  | 3214  | 4228  | 4325  | 4086  | 4117  | 3876  | 3618  | 3866  | 4781  | 4889  | 4676  | 4720  | 4323  | 4307  | 3820  | 4323  | 4092  | 4250  | 5457  | 3694  | 3801  | Scyl1  |        |
| Scyl2  | 9945  | 9388  | 8325  | 9059  | 8825  | 9043  | 9624  | 8156  | 6805  | 6301  | 6100  | 6799  | 6634  | 6779  | 10485 | 9493  | 8393  | 9084  | 8762  | 9904  | 9937  | 7072  | 6697  | 6037  | 6727  | 6043  | 6838  | 6699  | Scyl2  |        |
| Scyl3  | 3028  | 2538  | 2340  | 2533  | 2437  | 2684  | 2635  | 2593  | 2427  | 2305  | 2260  | 2499  | 2463  | 2511  | 2879  | 2805  | 2351  | 2292  | 2403  | 2402  | 2637  | 2593  | 2398  | 2291  | 2386  | 2242  | 2474  | 2365  | Scyl3  |        |
| Sdai1  | 6802  | 6522  | 6329  | 6500  | 5276  | 5884  | 5322  | 5648  | 5466  | 4914  | 5430  | 5622  | 5704  | 5847  | 6493  | 6269  | 5791  | 5296  | 5390  | 5944  | 5318  | 4725  | 5011  | 5100  | 5441  | 5208  | 6213  | 6092  | Sdai1  |        |
| Sdc1   | 6472  | 6360  | 6392  | 4390  | 3549  | 4595  | 2954  | 4004  | 5138  | 3888  | 4517  | 4157  | 4659  | 3777  | 5196  | 6867  | 4620  | 4429  | 3772  | 3761  | 3231  | 2884  | 5187  | 4106  | 3146  | 5411  | 4742  | 4353  | Sdc1   |        |
| Sdc2   | 3603  | 2753  | 3282  | 1555  | 1717  | 2134  | 1206  | 3519  | 4118  | 2994  | 3946  | 2879  | 4092  | 3190  | 3535  | 4213  | 2213  | 2177  | 1282  | 1440  | 1221  | 3270  | 4610  | 3034  | 2606  | 3367  | 3550  | 3514  | Sdc2   |        |
| Sdc3   | 6251  | 7510  | 7237  | 9783  | 13875 | 11760 | 9821  | 12379 | 15565 | 17418 | 16998 | 12950 | 11595 | 11638 | 6769  | 7387  | 8441  | 11392 | 12432 | 9728  | 11424 | 19590 | 14912 | 15475 | 18917 | 12490 | 11240 | 10423 | Sdc3   |        |
| Sdc4   | 1562  | 1107  | 1545  | 1199  | 815   | 982   | 760   | 799   | 1144  | 1056  | 1265  | 648   | 780   | 599   | 1298  | 1469  | 1239  | 1093  | 787   | 800   | 734   | 693   | 1193  | 944   | 603   | 1051  | 754   | 705   | Sdc4   |        |
| Sdcbp  | 23028 | 20064 | 18290 | 18836 | 16134 | 17350 | 19330 | 15242 | 12883 | 10536 | 10777 | 12086 | 12809 | 12509 | 25939 | 22332 | 19262 | 18358 | 17256 | 21638 | 18206 | 12482 | 14215 | 10793 | 10758 | 13283 | 12478 | 13602 | Sdcbp  |        |
| Sdcbp2 | 42    | 45    | 26    | 61    | 38    | 29    | 54    | 40    | 47    | 52    | 42    | 58    | 32    | 43    | 46    | 66    | 38    | 56    | 58    | 38    | 51    | 32    | 40    | 30    | 21    | 34    | 29    | 23    | Sdcbp2 |        |
| Sdccb2 | 1653  | 1831  | 1783  | 1857  | 1687  | 1565  | 1767  | 1211  | 1091  | 1253  | 1075  | 1083  | 1191  | 1160  | 1775  | 1586  | 1866  | 1746  | 1753  | 1768  | 1774  | 1041  | 1033  | 1113  | 1180  | 995   | 1104  | 1105  | Sdccb2 |        |
| Sde2   | 3748  | 3834  | 3805  | 3711  | 3088  | 3153  | 3016  | 2895  | 2766  | 2864  | 3065  | 3041  | 2854  | 2968  | 3422  | 3487  | 3413  | 3630  | 3274  | 3372  | 3144  | 2744  | 2823  | 2957  | 3101  | 3265  | 3098  | 2995  | Sde2   |        |
| Sdf2   | 2272  | 2590  | 2569  | 2382  | 2074  | 1834  | 1896  | 3174  | 3026  | 2963  | 2753  | 2712  | 2749  | 2736  | 2425  | 2437  | 2243  | 2271  | 2222  | 2478  | 1995  | 2991  | 3330  | 2951  | 2893  | 2943  | 2924  | 2789  | Sdf2   |        |
| Sdf2l1 | 1589  | 1918  | 2351  | 2017  | 1289  | 1309  | 1326  | 880   | 751   | 935   | 867   | 905   | 806   | 807   | 1659  | 1695  | 2255  | 1617  | 1659  | 1308  | 1365  | 668   | 805   | 1154  | 785   | 1143  | 895   | 991   | Sdf2l1 |        |
| Sdf4   | 6427  | 6071  | 6034  | 5582  | 5465  | 5606  | 5493  | 7978  | 7687  | 7450  | 7620  | 7910  | 7578  | 8062  | 6692  | 6069  | 5781  | 5399  | 5699  | 5555  | 5512  | 8079  | 8106  | 7906  | 6557  | 8734  | 8112  | 8472  | Sdf4   |        |
| Sdha   | 15428 | 16381 | 16064 | 14080 | 13506 | 13720 |       |       |       |       |       |       |       |       |       |       |       |       |       |       |       |       |       |       |       |       |       |       |        |        |



|           |       |       |       |       |       |       |       |       |       |       |       |       |       |       |       |       |       |       |       |       |       |       |       |       |       |       |       |       |           |
|-----------|-------|-------|-------|-------|-------|-------|-------|-------|-------|-------|-------|-------|-------|-------|-------|-------|-------|-------|-------|-------|-------|-------|-------|-------|-------|-------|-------|-------|-----------|
| Sec22c    | 4336  | 4710  | 5220  | 6595  | 6199  | 5948  | 6257  | 3621  | 3795  | 4432  | 4022  | 4760  | 4234  | 4644  | 4311  | 4463  | 5880  | 6498  | 6225  | 4958  | 6289  | 5083  | 3357  | 4747  | 4912  | 4274  | 4428  | 4799  | Sec22c    |
| Sec23a    | 15174 | 13646 | 12687 | 13380 | 13404 | 14263 | 14357 | 13081 | 11912 | 10011 | 11395 | 10432 | 10470 | 10587 | 16264 | 14018 | 13059 | 13760 | 13108 | 15921 | 14299 | 12373 | 12095 | 10239 | 11168 | 9366  | 10466 | 10372 | Sec23a    |
| Sec23b    | 9529  | 10271 | 8557  | 7919  | 6788  | 7203  | 7588  | 6433  | 5622  | 4878  | 4887  | 5973  | 5725  | 5995  | 9690  | 8416  | 8270  | 7259  | 7646  | 8375  | 8030  | 4705  | 5726  | 5434  | 5066  | 6518  | 6566  | 6710  | Sec23b    |
| Sec23ip   | 8502  | 9016  | 8602  | 8490  | 7780  | 7753  | 8492  | 6685  | 6620  | 6769  | 6666  | 7580  | 7106  | 8095  | 8558  | 8491  | 8613  | 8386  | 7528  | 7805  | 8179  | 7046  | 6308  | 6683  | 6897  | 7558  | 7673  | 7805  | Sec23ip   |
| Sec24a    | 3509  | 3052  | 3899  | 4163  | 4118  | 4213  | 4842  | 2761  | 2763  | 2893  | 3461  | 3254  | 3151  | 3228  | 3493  | 3529  | 3888  | 4242  | 3933  | 3313  | 4543  | 3419  | 2733  | 2862  | 3107  | 2676  | 2876  | 3071  | Sec24a    |
| Sec24b    | 5037  | 5151  | 5802  | 5832  | 6656  | 5941  | 6265  | 5923  | 6292  | 7263  | 6785  | 7274  | 6632  | 7119  | 4894  | 5155  | 5837  | 5841  | 6399  | 4764  | 6262  | 7417  | 6104  | 6910  | 6996  | 6592  | 6177  | 7115  | Sec24b    |
| Sec24c    | 15379 | 15633 | 17486 | 16740 | 15185 | 14632 | 15024 | 12169 | 12561 | 12937 | 12894 | 13599 | 13116 | 13531 | 14747 | 15283 | 17398 | 16314 | 16184 | 13167 | 15272 | 14292 | 11829 | 13411 | 13001 | 14232 | 12753 | 13205 | Sec24c    |
| Sec24d    | 3718  | 3141  | 2879  | 2425  | 2265  | 2515  | 2050  | 1899  | 3014  | 2111  | 3619  | 1664  | 2315  | 1542  | 3137  | 3847  | 2577  | 2839  | 2123  | 1953  | 2043  | 2044  | 3632  | 1982  | 1801  | 1969  | 1868  | 1634  | Sec24d    |
| Sec31a    | 13055 | 13054 | 12057 | 11555 | 10292 | 10902 | 10800 | 10086 | 12021 | 11812 | 12821 | 11291 | 11247 | 10666 | 11170 | 12878 | 11652 | 12025 | 10977 | 9662  | 10617 | 11956 | 12485 | 11140 | 11001 | 10849 | 10528 | 10948 | Sec31a    |
| Sec31b    | 130   | 155   | 157   | 162   | 129   | 58    | 83    | 42    | 65    | 35    | 78    | 61    | 66    | 45    | 105   | 186   | 154   | 108   | 132   | 95    | 50    | 49    | 50    | 42    | 44    | 86    | 58    | 58    | Sec31b    |
| Sec61a1   | 14245 | 16565 | 14085 | 13364 | 12130 | 12784 | 11833 | 10408 | 12428 | 11026 | 12349 | 11429 | 12038 | 10380 | 13843 | 15704 | 13282 | 13617 | 12970 | 12645 | 11754 | 10901 | 12442 | 11265 | 11376 | 12405 | 11898 | 10964 | Sec61a1   |
| Sec61a2   | 7982  | 6398  | 5846  | 5926  | 6658  | 7860  | 7096  | 6831  | 6555  | 6094  | 6910  | 6151  | 6454  | 6049  | 7512  | 7372  | 5676  | 6236  | 6265  | 7750  | 7132  | 6152  | 6356  | 5695  | 6131  | 5509  | 6148  | 5821  | Sec61a2   |
| Sec61b    | 2887  | 3534  | 3295  | 3038  | 2447  | 2341  | 2813  | 2405  | 2459  | 2418  | 2727  | 2487  | 2755  | 3034  | 2832  | 2794  | 3330  | 2860  | 2603  | 2979  | 2707  | 1801  | 2504  | 2938  | 2503  | 3175  | 2743  | 3252  | Sec61b    |
| Sec61g    | 4176  | 4000  | 3770  | 4120  | 3268  | 2848  | 5374  | 4092  | 3269  | 4123  | 4362  | 3587  | 3768  | 5916  | 3967  | 2759  | 4194  | 3207  | 3317  | 3814  | 5028  | 3208  | 3486  | 4534  | 3906  | 4204  | 3810  | 6044  | Sec61g    |
| Sec62     | 8397  | 6996  | 8657  | 7819  | 7829  | 7859  | 8487  | 11615 | 9648  | 9610  | 10044 | 9677  | 9668  | 9807  | 9175  | 8308  | 7789  | 7704  | 7678  | 9200  | 8026  | 10870 | 10508 | 9671  | 9613  | 10368 | 9874  | 10007 | Sec62     |
| Sec63     | 14762 | 11231 | 13845 | 14516 | 13215 | 14321 | 15525 | 13283 | 11284 | 12339 | 12540 | 14207 | 12703 | 15128 | 14277 | 13030 | 13969 | 13777 | 13344 | 12378 | 14430 | 13272 | 11086 | 13473 | 13101 | 13761 | 13763 | 14938 | Sec63     |
| Secisbp2  | 781   | 935   | 982   | 961   | 1109  | 993   | 977   | 1970  | 2115  | 2172  | 2147  | 2497  | 2384  | 2258  | 901   | 769   | 950   | 851   | 1160  | 1031  | 869   | 2107  | 2137  | 2344  | 2304  | 2432  | 2501  | 2409  | Secisbp2  |
| Secisbp2l | 10010 | 8935  | 8898  | 10920 | 11126 | 11903 | 12240 | 9116  | 8680  | 9055  | 9712  | 9479  | 9615  | 9961  | 10626 | 9583  | 9826  | 11157 | 10649 | 11107 | 11614 | 9804  | 8376  | 8936  | 10351 | 7153  | 9635  | 9327  | Secisbp2l |
| Sectm1a   | 1     | 0     | 0     | 0     | 1     | 2     | 0     | 0     | 5     | 0     | 2     | 4     | 0     | 0     | 0     | 0     | 0     | 0     | 0     | 0     | 0     | 0     | 9     | 0     | 0     | 1     | 2     | 2     | Sectm1a   |
| Sectm1b   | 0     | 0     | 0     | 0     | 0     | 0     | 0     | 1     | 2     | 0     | 1     | 0     | 0     | 0     | 0     | 0     | 0     | 0     | 0     | 0     | 0     | 2     | 5     | 0     | 0     | 0     | 0     | 0     | Sectm1b   |
| Sel11     | 3775  | 2641  | 3038  | 2618  | 2828  | 2952  | 3222  | 7646  | 7011  | 6235  | 6641  | 7281  | 7193  | 7794  | 3456  | 2868  | 2960  | 2735  | 2929  | 3187  | 2784  | 6005  | 6829  | 6848  | 6347  | 8347  | 7645  | 7734  | Sel11     |
| Sel11l    | 14671 | 14463 | 11551 | 14198 | 13113 | 13686 | 14250 | 10220 | 10385 | 11198 | 11601 | 10547 | 10553 | 10666 | 14004 | 14932 | 12217 | 15153 | 13167 | 11876 | 14885 | 11575 | 10049 | 10508 | 11524 | 8052  | 10197 | 10361 | Sel11l    |
| Sel112    | 0     | 2     | 5     | 0     | 0     | 0     | 1     | 0     | 0     | 1     | 3     | 1     | 1     | 0     | 0     | 2     | 0     | 2     | 0     | 2     | 0     | 1     | 0     | 0     | 2     | 0     | 1     | 1     | Sel112    |
| Sel113    | 975   | 1020  | 880   | 1133  | 1680  | 1458  | 1785  | 1762  | 2105  | 1944  | 1842  | 2175  | 1413  | 2208  | 1093  | 806   | 1191  | 1385  | 1707  | 1441  | 1630  | 1913  | 1733  | 2075  | 2394  | 2126  | 1514  | 1762  | Sel113    |
| Sele      | 0     | 0     | 0     | 0     | 3     | 0     | 0     | 1     | 0     | 0     | 7     | 0     | 0     | 0     | 1     | 2     | 1     | 1     | 0     | 0     | 1     | 0     | 4     | 2     | 0     | 0     | 0     | 0     | Sele      |
| Selenbp1  | 268   | 313   | 240   | 322   | 353   | 237   | 240   | 396   | 560   | 462   | 548   | 275   | 314   | 219   | 247   | 350   | 251   | 318   | 300   | 270   | 292   | 364   | 632   | 380   | 358   | 288   | 238   | 274   | Selenbp1  |
| Selenbp2  | 2     | 0     | 0     | 0     | 1     | 1     | 1     | 5     | 3     | 2     | 5     | 0     | 1     | 0     | 1     | 4     | 0     | 0     | 0     | 1     | 0     | 0     | 5     | 5     | 2     | 0     | 0     | 0     | Selenbp2  |
| Selenof   | 16237 | 14299 | 14539 | 15097 | 12773 | 14260 | 15535 | 14493 | 13984 | 11930 | 12192 | 11905 | 11953 | 13050 | 17664 | 15888 | 14764 | 13874 | 14251 | 18052 | 15689 | 11150 | 14956 | 12463 | 11712 | 13432 | 12604 | 13992 | Selenof   |
| Selenoh   | 5341  | 6338  | 6252  | 5870  | 4610  | 5182  | 5599  | 4493  | 4641  | 4637  | 4533  | 6348  | 5787  | 6242  | 5070  | 4996  | 6189  | 5039  | 5675  | 6778  | 5168  | 3205  | 4154  | 6104  | 5335  | 8055  | 7089  | 6754  | Selenoh   |
| Selenoi   | 8035  | 7603  | 6133  | 7995  | 8080  | 8393  | 7577  | 7697  | 6481  | 6033  | 6155  | 6206  | 6009  | 6067  | 8327  | 7718  | 7010  | 7998  | 7534  | 9123  | 7576  | 6706  | 6260  | 5600  | 7128  | 5180  | 6359  | 5891  | Selenoi   |
| Selenok   | 5995  | 5918  | 6159  | 5753  | 5470  | 5006  | 6604  | 6699  | 5353  | 5466  | 5160  | 5015  | 5235  | 5642  | 6558  | 5122  | 5817  | 5477  | 5834  | 6368  | 6520  | 5857  | 5353  | 5726  | 5693  | 5687  | 5510  | 6342  | Selenok   |
| Selenom   | 1171  | 1456  | 1484  | 1407  | 981   | 1121  | 746   | 729   | 1089  | 921   | 1339  | 765   | 816   | 707   | 1261  | 1555  | 1327  | 1173  | 1050  | 959   | 827   | 722   | 1208  | 1028  | 666   | 1108  | 798   | 705   | Selenom   |
| Selenon   | 3160  | 4016  | 3982  | 3101  | 3193  | 3479  | 2686  | 4835  | 6298  | 6612  | 6825  | 7292  | 6688  | 6363  | 3210  | 4220  | 3845  | 3536  | 3497  | 2486  | 2747  | 6704  | 6354  | 7019  | 6259  | 7259  | 6251  | 6810  | Selenon   |
| Selenoo   | 1914  | 2088  | 1882  | 1904  | 1703  | 1947  | 1986  | 1881  | 1885  | 1930  | 1715  | 2044  | 1759  | 1845  | 1928  | 1767  | 1732  | 1837  | 2041  | 1966  | 1889  | 1765  | 1784  | 1940  | 1981  | 1950  | 1973  | 1850  | Selenoo   |
| Selenop   | 4984  | 4665  | 4944  | 4344  | 5458  | 5106  | 4399  | 5796  | 6208  | 5313  | 7379  | 4805  | 5706  | 4600  | 5806  | 6232  | 3975  | 5522  | 3921  | 5867  | 4690  | 6515  | 9552  | 4943  | 4928  | 5127  | 4998  | 4250  | Selenop   |
| Selenos   | 2291  | 2488  | 2212  | 2374  | 2068  | 2196  | 2304  | 1960  | 2115  | 1940  | 2253  | 1756  | 1927  | 1884  | 2443  | 2407  | 2187  | 2474  | 1894  | 2309  | 2081  | 1928  | 2238  | 2006  | 1843  | 2068  | 1740  | 1978  | Selenos   |
| Selenot   | 9357  | 7431  | 10652 | 9739  | 10690 | 9852  | 10966 | 12270 | 9619  | 9387  | 10357 | 10943 | 11186 | 11968 | 10259 | 8420  | 10009 | 9021  | 9933  | 10343 | 10372 | 12156 | 10372 | 10743 | 11491 | 12034 | 11685 | 12256 | Selenot   |
| Selenov   | 50    | 76    | 79    | 66    | 79    | 91    | 55    | 53    | 40    | 27    | 52    | 72    | 101   | 62    | 57    | 72    | 66    | 85    | 64    | 64    | 65    | 47    | 45    | 43    | 49    | 20    | 60    | 94    | Selenov   |
| Selenow   | 12222 | 15967 | 15507 | 16822 | 17855 | 14255 | 17511 | 12688 | 13648 | 14774 | 14345 | 14459 | 13888 | 18825 | 11772 | 11506 | 16474 | 15835 | 16476 | 14395 | 18283 | 11814 | 13215 | 17115 | 15831 | 16337 | 14367 | 18176 | Selenow   |
| Sell      | 2     | 0     | 2     | 3     | 1     | 5     | 0     | 4     | 2     | 2     | 9     | 3     | 5     | 2     | 3     | 2     | 7     | 7     | 0     | 2     | 0     | 8     | 8     | 3     | 0     | 1     | 2     | 2     | Sell      |
| Selp      | 0     | 6     | 0     | 1     | 2     | 0     | 1     | 1     | 2     | 1     | 8     | 0     | 0     | 0     | 0     | 0     | 0     | 3     | 0     | 1     | 0     | 2     | 1     | 3     | 2     | 2     | 1     | 1     | Selp      |
| Selplg    | 33    | 54    | 65    | 44    | 37    | 42    | 22    | 22    | 63    | 53    | 59    | 35    | 40    | 28    | 34    | 51    | 58    | 58    | 41    | 41    | 29    | 50    | 57    | 43    | 36    | 34    | 35    | 34    | Selplg    |
| Sem1      | 5638  | 6154  | 6743  | 6227  | 4914  | 3923  | 7469  | 5410  | 4759  | 6260  | 5596  | 5954  | 5408  | 8812  | 5354  | 3817  | 6934  | 5072  | 5134  | 5861  | 7073  | 3778  | 4653  | 7750  | 5864  | 7338  | 6327  | 8812  | Sem1      |
| Sema3a    | 3037  | 1948  | 1341  | 1410  | 1565  | 1978  | 1431  | 4735  | 5090  | 4221  | 4868  | 3028  | 3672  | 2796  | 2666  | 2970  | 1284  | 1577  | 1471  | 1633  | 1346  | 2912  | 5176  | 3395  | 2844  | 3587  | 2468  | 2514  | Sema3a    |
| Sema3b    | 181   | 212   | 173   | 153   | 239   | 186   | 129   | 206   | 311   | 263   | 435   | 231   | 289   | 182   | 212   | 234   | 149   | 180   | 120   | 157   | 128   | 309   | 407   | 232   | 212   | 239   | 225   | 177   | Sema3b    |
| Sema3c    | 2490  | 2109  | 2232  | 2062  | 1992  | 3371  | 2110  | 3980  | 4529  | 4157  | 6092  | 3968  | 3601  | 4292  | 3066  | 3066  | 1856  | 3061  | 1731  | 2041  | 1896  | 4306  | 6490  | 4166  | 4632  | 2678  | 3871  | 3967  | Sema3c    |
| Sema3d    | 1096  | 586   | 414   | 386   | 305   | 780   | 249   | 1871  | 2261  | 1584  | 2054  | 674   | 963   | 653   | 919   | 1044  | 407   | 611   | 275   | 304   | 251   | 1111  | 2487  | 1144  | 837   | 581   | 525   | 582   | Sema3d    |
| Sema3e    | 576   | 595   | 629   | 479   | 797   | 588   | 523   | 644   | 873   | 901   | 83    |       |       |       |       |       |       |       |       |       |       |       |       |       |       |       |       |       |           |



|        |       |       |       |       |       |       |       |       |       |       |       |       |       |       |       |       |       |       |       |       |       |       |       |       |       |       |       |       |        |        |
|--------|-------|-------|-------|-------|-------|-------|-------|-------|-------|-------|-------|-------|-------|-------|-------|-------|-------|-------|-------|-------|-------|-------|-------|-------|-------|-------|-------|-------|--------|--------|
| Sestd1 | 9840  | 8189  | 7415  | 10131 | 13704 | 12875 | 12850 | 17434 | 15227 | 15919 | 15199 | 14389 | 13454 | 14391 | 10646 | 8627  | 9021  | 11047 | 12016 | 12416 | 12919 | 18290 | 13279 | 13557 | 17890 | 10404 | 14451 | 13046 | Sestd1 |        |
| Set    | 36369 | 29575 | 44484 | 33040 | 30309 | 30702 | 37793 | 46132 | 39035 | 43859 | 41029 | 55940 | 51030 | 63406 | 34305 | 29897 | 38374 | 30261 | 32805 | 33780 | 34230 | 39746 | 38200 | 52567 | 47755 | 67812 | 57711 | 66669 | Set    |        |
| Setbp1 | 3704  | 3346  | 3149  | 4401  | 5161  | 5268  | 5460  | 11852 | 12060 | 14436 | 13014 | 17389 | 14111 | 17098 | 3703  | 3204  | 4020  | 4420  | 5331  | 4354  | 5435  | 14302 | 10395 | 14243 | 16939 | 10326 | 16269 | 15721 | Setbp1 |        |
| Setd1a | 1819  | 2154  | 2627  | 2350  | 2302  | 2212  | 2239  | 1785  | 2230  | 2557  | 2698  | 2986  | 2635  | 2804  | 1652  | 1912  | 2624  | 2431  | 2514  | 2012  | 2239  | 2361  | 2057  | 3097  | 2551  | 2973  | 2774  | 2619  | Setd1a |        |
| Setd1b | 1724  | 2150  | 3272  | 2918  | 3664  | 2668  | 2448  | 3947  | 4458  | 6273  | 5853  | 7022  | 5082  | 5814  | 1590  | 1738  | 3591  | 2794  | 3609  | 1978  | 2893  | 6545  | 3996  | 7017  | 6708  | 6234  | 5217  | 5744  | Setd1b |        |
| Setd2  | 15031 | 12883 | 9339  | 13109 | 14496 | 16185 | 15901 | 17982 | 16776 | 15362 | 15991 | 16634 | 16314 | 17479 | 14869 | 13671 | 11249 | 12679 | 13450 | 14743 | 16098 | 15303 | 16106 | 12964 | 16413 | 9985  | 16712 | 15151 | Setd2  |        |
| Setd3  | 12076 | 11990 | 11999 | 12256 | 11730 | 12078 | 12971 | 8394  | 7765  | 8428  | 8598  | 8409  | 8475  | 9350  | 12096 | 11467 | 12012 | 12108 | 12126 | 12444 | 12783 | 8051  | 7882  | 8404  | 8932  | 8317  | 8450  | 8897  | Setd3  |        |
| Setd4  | 371   | 416   | 508   | 543   | 591   | 441   | 505   | 806   | 859   | 975   | 916   | 917   | 957   | 806   | 400   | 393   | 505   | 519   | 548   | 427   | 493   | 864   | 896   | 1054  | 896   | 852   | 858   | 888   | Setd4  |        |
| Setd5  | 19775 | 17089 | 18002 | 19948 | 20478 | 20751 | 19636 | 19274 | 19051 | 20740 | 21724 | 22503 | 21524 | 20921 | 18770 | 18397 | 19782 | 19648 | 19913 | 17204 | 20154 | 20386 | 18478 | 19775 | 20421 | 17547 | 21792 | 20689 | Setd5  |        |
| Setd6  | 997   | 927   | 1186  | 1055  | 991   | 916   | 1124  | 1067  | 920   | 989   | 950   | 1138  | 1038  | 1237  | 949   | 793   | 1029  | 1086  | 1047  | 1065  | 1047  | 2078  | 18478 | 19775 | 20421 | 17547 | 21792 | 20689 | Setd6  |        |
| Setd7  | 3060  | 2630  | 3363  | 3192  | 3733  | 3684  | 3651  | 4553  | 4853  | 4944  | 5594  | 5214  | 5163  | 5268  | 2917  | 2753  | 3522  | 3275  | 3876  | 3247  | 3533  | 4841  | 4576  | 5323  | 5284  | 4802  | 5218  | 5188  | Setd7  |        |
| Setdb1 | 12762 | 12524 | 12217 | 12128 | 11713 | 11942 | 13198 | 12190 | 11993 | 11821 | 11271 | 12917 | 12027 | 13029 | 12595 | 11830 | 12318 | 12034 | 12564 | 11432 | 12690 | 12248 | 11001 | 12151 | 11933 | 12637 | 12265 | 13021 | Setdb1 |        |
| Setdb2 | 1940  | 1446  | 1208  | 1315  | 1183  | 1401  | 1422  | 1010  | 861   | 824   | 903   | 910   | 846   | 990   | 1911  | 1599  | 1074  | 1199  | 1160  | 1414  | 1275  | 732   | 916   | 806   | 770   | 916   | 902   | 850   | Setdb2 |        |
| Setmar | 183   | 267   | 273   | 209   | 218   | 161   | 209   | 460   | 400   | 450   | 372   | 403   | 502   | 431   | 248   | 242   | 254   | 199   | 234   | 276   | 200   | 428   | 463   | 422   | 340   | 506   | 518   | 412   | Setmar |        |
| Setx   | 19484 | 16819 | 11627 | 14977 | 16312 | 19644 | 19608 | 18437 | 15568 | 13467 | 14153 | 14606 | 14832 | 15742 | 19711 | 16897 | 12356 | 14714 | 14816 | 19897 | 19612 | 12121 | 14593 | 11281 | 15901 | 9862  | 16418 | 14012 | Setx   |        |
| Sez6   | 3700  | 6000  | 4451  | 12177 | 14484 | 12154 | 13689 | 5991  | 8161  | 10765 | 7765  | 8309  | 5139  | 7289  | 4415  | 3678  | 9425  | 13774 | 15264 | 9745  | 14692 | 10866 | 6835  | 10914 | 13557 | 6500  | 5007  | 5234  | Sez6   |        |
| Sez6l  | 1978  | 2664  | 2962  | 5954  | 9236  | 7172  | 7816  | 4455  | 5444  | 8213  | 6044  | 6289  | 4657  | 6179  | 2567  | 2361  | 4888  | 7087  | 8486  | 6395  | 8449  | 9987  | 5255  | 7755  | 10077 | 3914  | 4444  | 4742  | Sez6l  |        |
| Sez6i2 | 1512  | 2262  | 2183  | 3897  | 5634  | 4095  | 3870  | 3055  | 3620  | 4817  | 3658  | 3709  | 3122  | 3415  | 1850  | 1846  | 3560  | 4471  | 5062  | 3387  | 4649  | 5601  | 3155  | 4139  | 5093  | 2828  | 2907  | 3082  | Sez6i2 |        |
| Sf1    | 0     | 3     | 0     | 0     | 0     | 0     | 1     | 1     | 0     | 1     | 2     | 0     | 0     | 1     | 0     | 0     | 0     | 0     | 0     | 0     | 0     | 0     | 1     | 0     | 1     | 0     | 1     | 0     | Sf1    |        |
| Sf3a1  | 8053  | 8120  | 10865 | 9908  | 8665  | 7872  | 7630  | 9964  | 10540 | 11735 | 11207 | 15287 | 12105 | 14094 | 7251  | 8213  | 10699 | 9425  | 9913  | 6205  | 8418  | 13369 | 9655  | 14212 | 13414 | 16678 | 12187 | 14551 | Sf3a1  |        |
| Sf3a2  | 2323  | 3144  | 4388  | 3628  | 3306  | 2778  | 2509  | 2762  | 3438  | 4016  | 4082  | 4835  | 3868  | 4558  | 1975  | 2520  | 4219  | 3334  | 3862  | 2258  | 2831  | 3867  | 3161  | 5176  | 4245  | 6277  | 3998  | 4434  | Sf3a2  |        |
| Sf3a3  | 7530  | 7284  | 8651  | 6149  | 5301  | 5743  | 6566  | 7465  | 6815  | 6672  | 6667  | 8258  | 7508  | 9470  | 7030  | 6724  | 7066  | 5281  | 6169  | 6688  | 6024  | 5863  | 6627  | 7992  | 7178  | 9973  | 9230  | 9538  | Sf3a3  |        |
| Sf3b1  | 49876 | 42618 | 36702 | 38893 | 41889 | 43975 | 48137 | 62008 | 53446 | 44168 | 46339 | 51640 | 48036 | 52021 | 52339 | 44176 | 38199 | 39748 | 40816 | 50475 | 44564 | 49501 | 50910 | 46193 | 47712 | 43670 | 50465 | 49039 | Sf3b1  |        |
| Sf3b2  | 24264 | 27459 | 29081 | 26549 | 23940 | 23601 | 25652 | 23709 | 25938 | 27933 | 24581 | 32525 | 28161 | 32692 | 23165 | 24179 | 29071 | 24883 | 26633 | 23239 | 25816 | 24645 | 24388 | 29426 | 28222 | 34309 | 30303 | 33831 | Sf3b2  |        |
| Sf3b3  | 27358 | 27750 | 22485 | 19963 | 18119 | 20338 | 20240 | 25442 | 22612 | 19624 | 19445 | 25237 | 22999 | 23044 | 25288 | 23576 | 21606 | 19459 | 20374 | 21581 | 20653 | 20296 | 21904 | 21363 | 21270 | 25423 | 26097 | 24930 | Sf3b3  |        |
| Sf3b4  | 4083  | 4983  | 5998  | 4953  | 4498  | 4087  | 4123  | 3303  | 3938  | 3922  | 3984  | 4642  | 4052  | 4743  | 3835  | 4519  | 5514  | 4644  | 4894  | 3605  | 4278  | 3900  | 3751  | 4658  | 4218  | 5981  | 4242  | 4558  | Sf3b4  |        |
| Sf3b5  | 2382  | 3162  | 2514  | 2401  | 1675  | 1828  | 1872  | 1500  | 1557  | 1418  | 1552  | 1590  | 1602  | 1490  | 2292  | 2190  | 2393  | 2041  | 2067  | 2295  | 1854  | 1158  | 1582  | 1763  | 1494  | 2026  | 1741  | 1645  | Sf3b5  |        |
| Sf3b6  | 7125  | 6889  | 6938  | 7148  | 6089  | 6536  | 8152  | 5951  | 5160  | 4845  | 4458  | 5402  | 5251  | 6444  | 7800  | 6851  | 6661  | 6392  | 6756  | 8553  | 7554  | 4370  | 4974  | 5289  | 5060  | 5920  | 5742  | 6419  | Sf3b6  |        |
| Sf1i   | 1088  | 1242  | 1291  | 1220  | 1173  | 1028  | 1130  | 1738  | 1945  | 1796  | 1827  | 1454  | 2038  | 1611  | 1048  | 1168  | 1102  | 1276  | 1156  | 935   | 1137  | 1683  | 1685  | 1630  | 1389  | 1614  | 1991  | 1720  | Sf1i   |        |
| Sfmbt1 | 3564  | 2963  | 3362  | 3942  | 4309  | 4268  | 4635  | 4197  | 3976  | 3936  | 3806  | 4544  | 3677  | 4710  | 3527  | 2951  | 3685  | 3688  | 4274  | 4116  | 4395  | 4075  | 3634  | 4250  | 4760  | 4427  | 4491  | 4488  | Sfmbt1 |        |
| Sfmbt2 | 901   | 696   | 668   | 799   | 988   | 921   | 822   | 485   | 567   | 493   | 552   | 380   | 411   | 364   | 824   | 769   | 847   | 785   | 771   | 899   | 821   | 535   | 608   | 331   | 448   | 298   | 408   | 325   | Sfmbt2 |        |
| Sfn    | 667   | 561   | 438   | 265   | 323   | 412   | 212   | 688   | 1208  | 651   | 634   | 459   | 608   | 396   | 448   | 513   | 319   | 428   | 316   | 208   | 224   | 177   | 1247  | 651   | 208   | 343   | 389   | 504   | Sfn    |        |
| Sfq    | 39362 | 31848 | 40389 | 36670 | 35727 | 36170 | 40208 | 59501 | 53093 | 55310 | 55148 | 62301 | 55801 | 71514 | 35102 | 33272 | 38348 | 32981 | 38559 | 35005 | 41834 | 51210 | 47945 | 57266 | 60310 | 58196 | 62046 | 64938 | Sfq    |        |
| Sfr1   | 11242 | 10324 | 12540 | 10361 | 9464  | 9684  | 10891 | 11707 | 10458 | 10413 | 10723 | 11907 | 11575 | 13378 | 11747 | 10051 | 11807 | 10002 | 10203 | 12041 | 10200 | 9648  | 10764 | 12217 | 11059 | 14460 | 12658 | 13848 | Sfr1   |        |
| Sfrp1  | 24480 | 23844 | 22281 | 22007 | 16248 | 18292 | 22148 | 12482 | 13228 | 12836 | 12877 | 17267 | 16097 | 18138 | 22362 | 22260 | 20965 | 19860 | 19002 | 17938 | 18940 | 8637  | 10008 | 15586 | 13052 | 22643 | 15150 | 17757 | Sfrp1  |        |
| Sfrp2  | 3842  | 3286  | 4192  | 2933  | 2655  | 3563  | 2481  | 5144  | 9321  | 6024  | 10520 | 3227  | 3593  | 3374  | 3467  | 3836  | 3741  | 3673  | 2865  | 2160  | 2364  | 6829  | 11691 | 4826  | 4239  | 4529  | 3127  | 3489  | Sfrp2  |        |
| Sfrp4  | 358   | 314   | 377   | 345   | 390   | 284   | 437   | 194   | 194   | 190   | 183   | 171   | 156   | 178   | 343   | 264   | 351   | 320   | 325   | 364   | 382   | 180   | 177   | 168   | 187   | 186   | 230   | 151   | Sfrp4  |        |
| Sfrp5  | 21    | 32    | 3     | 18    | 116   | 3     | 2     | 106   | 166   | 130   | 222   | 11    | 79    | 9     | 12    | 37    | 22    | 64    | 2     | 1     | 7     | 206   | 155   | 16    | 91    | 19    | 5     | 9     | Sfrp5  |        |
| Sfswap | 8711  | 8612  | 7862  | 8988  | 9803  | 9838  | 9131  | 9729  | 9798  | 10837 | 10180 | 10407 | 9611  | 10159 | 8500  | 8175  | 8324  | 8921  | 9604  | 8859  | 9578  | 9984  | 9007  | 9842  | 10460 | 8956  | 10072 | 9258  | Sfswap |        |
| Sft2d1 | 2646  | 2587  | 2504  | 2886  | 2990  | 2875  | 3136  | 2633  | 2386  | 2267  | 2461  | 2456  | 2445  | 2596  | 2596  | 2721  | 2787  | 3101  | 2793  | 2719  | 3044  | 2841  | 2232  | 2295  | 2633  | 2043  | 2219  | 2300  | Sft2d1 |        |
| Sft2d2 | 5338  | 4436  | 3714  | 3631  | 2891  | 3457  | 3129  | 2232  | 2564  | 2153  | 2751  | 2335  | 2698  | 2245  | 4149  | 5162  | 3186  | 3882  | 3158  | 2932  | 3035  | 2229  | 2834  | 2350  | 2056  | 2517  | 2392  | 2404  | Sft2d2 |        |
| Sft2d3 | 621   | 447   | 565   | 463   | 483   | 462   | 518   | 691   | 656   | 670   | 631   | 704   | 722   | 715   | 564   | 466   | 518   | 449   | 514   | 551   | 520   | 685   | 704   | 605   | 629   | 642   | 830   | 806   | Sft2d3 |        |
| Sfta2  | 2     | 2     | 0     | 0     | 0     | 0     | 1     | 1     | 1     | 3     | 1     | 7     | 1     | 4     | 0     | 0     | 0     | 0     | 0     | 0     | 0     | 6     | 2     | 1     | 2     | 0     | 2     | 0     | 0      | Sfta2  |
| Sftpa1 | 0     | 0     | 0     | 0     | 0     | 0     | 0     | 0     | 0     | 0     | 0     | 0     | 0     | 0     | 0     | 0     | 0     | 1     | 0     | 0     | 1     | 2     | 1     | 0     | 2     | 0     | 0     | 0     | 0      | Sftpa1 |
| Sftpb  | 0     | 0     | 0     | 0     | 0     | 0     | 0     | 0     | 0     | 0     | 0     | 0     | 0     | 0     | 0     | 0     | 0     | 0     | 0     | 2     | 0     | 0     | 0     | 0     | 0     | 0     | 0     | 0     | 0      | Sftpb  |
| Sftpc  | 0     | 0     | 0     | 0     | 0     | 0     | 0     | 0     | 1     | 3     | 0     | 1     | 0     | 0     | 0     | 1     | 0     | 0     | 1     | 0     | 0     | 0     | 0     | 0     | 0     | 0     | 4     | 0     | 0      | Sftpc  |
| Sftpd  | 0     | 0     | 0     |       |       |       |       |       |       |       |       |       |       |       |       |       |       |       |       |       |       |       |       |       |       |       |       |       |        |        |

|          |       |       |       |       |       |       |       |       |       |       |       |       |       |       |       |       |       |       |       |       |       |       |       |       |       |       |       |        |          |
|----------|-------|-------|-------|-------|-------|-------|-------|-------|-------|-------|-------|-------|-------|-------|-------|-------|-------|-------|-------|-------|-------|-------|-------|-------|-------|-------|-------|--------|----------|
| Sh2b3    | 3151  | 3498  | 3360  | 2975  | 2472  | 2431  | 2261  | 977   | 1255  | 1235  | 1603  | 1246  | 1418  | 1174  | 2939  | 3572  | 3243  | 2969  | 2323  | 2117  | 2356  | 1360  | 1381  | 1373  | 1163  | 1573  | 1367  | 1277   | Sh2b3    |
| Sh2d1a   | 2     | 0     | 3     | 11    | 2     | 4     | 8     | 5     | 5     | 2     | 3     | 4     | 2     | 2     | 3     | 1     | 2     | 6     | 3     | 1     | 3     | 3     | 4     | 10    | 3     | 7     | 9     | 2      | Sh2d1a   |
| Sh2d1b1  | 0     | 4     | 0     | 1     | 0     | 3     | 0     | 5     | 2     | 0     | 9     | 1     | 5     | 2     | 3     | 4     | 3     | 2     | 2     | 2     | 5     | 0     | 7     | 2     | 7     | 7     | 5     | 1      | Sh2d1b1  |
| Sh2d1b2  | 0     | 0     | 0     | 0     | 0     | 0     | 0     | 0     | 0     | 0     | 0     | 0     | 0     | 0     | 0     | 0     | 0     | 0     | 0     | 0     | 0     | 0     | 1     | 0     | 1     | 0     | 0     | 0      | Sh2d1b2  |
| Sh2d2a   | 5     | 0     | 1     | 5     | 1     | 0     | 0     | 0     | 1     | 0     | 0     | 1     | 2     | 3     | 5     | 2     | 1     | 0     | 0     | 1     | 0     | 0     | 2     | 1     | 0     | 2     | 3     | 0      | Sh2d2a   |
| Sh2d3c   | 1373  | 2027  | 1726  | 1871  | 1685  | 1419  | 1264  | 1045  | 1261  | 1464  | 1439  | 1502  | 1479  | 1196  | 1350  | 1759  | 1913  | 1631  | 1645  | 1250  | 1375  | 1340  | 1308  | 1452  | 1349  | 1805  | 1413  | 1314   | Sh2d3c   |
| Sh2d4a   | 17    | 25    | 8     | 1     | 17    | 2     | 6     | 72    | 81    | 53    | 56    | 18    | 58    | 22    | 18    | 25    | 5     | 26    | 15    | 9     | 4     | 37    | 71    | 17    | 22    | 4     | 35    | 36     | Sh2d4a   |
| Sh2d4b   | 1177  | 1246  | 1161  | 2076  | 1975  | 1795  | 2331  | 504   | 456   | 649   | 583   | 539   | 468   | 583   | 1178  | 1173  | 1688  | 2368  | 2031  | 1458  | 2217  | 720   | 392   | 613   | 713   | 397   | 409   | 415    | Sh2d4b   |
| Sh2d5    | 989   | 1302  | 1184  | 1372  | 1763  | 1472  | 1386  | 542   | 591   | 693   | 643   | 470   | 607   | 492   | 976   | 1280  | 1423  | 1620  | 1644  | 1429  | 1446  | 864   | 579   | 554   | 670   | 347   | 437   | 356    | Sh2d5    |
| Sh2d6    | 46    | 78    | 68    | 81    | 93    | 101   | 60    | 94    | 66    | 67    | 76    | 101   | 101   | 122   | 78    | 61    | 70    | 63    | 73    | 61    | 80    | 95    | 65    | 78    | 84    | 76    | 93    | 90     | Sh2d6    |
| Sh2d7    | 2     | 1     | 2     | 1     | 15    | 11    | 8     | 4     | 20    | 5     | 4     | 8     | 5     | 13    | 3     | 2     | 5     | 13    | 9     | 5     | 12    | 2     | 3     | 7     | 11    | 11    | 3     | 5      | Sh2d7    |
| Sh3bgr   | 175   | 137   | 239   | 193   | 170   | 152   | 177   | 73    | 65    | 80    | 282   | 66    | 79    | 66    | 182   | 169   | 161   | 173   | 179   | 152   | 193   | 90    | 187   | 73    | 63    | 70    | 60    | 68     | Sh3bgr   |
| Sh3bgrl  | 25262 | 17157 | 24805 | 22289 | 22309 | 23836 | 27178 | 28234 | 23238 | 20196 | 20783 | 26183 | 24188 | 27737 | 27677 | 22181 | 22477 | 21709 | 22551 | 27786 | 24769 | 24105 | 23295 | 23808 | 24234 | 29372 | 27021 | 28147  | Sh3bgrl  |
| Sh3bgrl2 | 3547  | 3308  | 2939  | 2786  | 2918  | 2812  | 3093  | 1429  | 1412  | 1289  | 1134  | 1156  | 1107  | 1092  | 3654  | 3324  | 2875  | 3266  | 2929  | 3372  | 3235  | 1135  | 1460  | 1167  | 1309  | 1186  | 1040  | 1061   | Sh3bgrl2 |
| Sh3bgrl3 | 2393  | 3104  | 2447  | 2161  | 2102  | 2134  | 1872  | 1923  | 2372  | 2367  | 2401  | 2155  | 2489  | 2151  | 2293  | 2655  | 2365  | 2128  | 2099  | 2192  | 2107  | 2024  | 2537  | 2199  | 2166  | 2574  | 2166  | 2303   | Sh3bgrl3 |
| Sh3bp1   | 354   | 346   | 407   | 296   | 169   | 247   | 173   | 160   | 205   | 210   | 287   | 126   | 164   | 128   | 208   | 421   | 290   | 283   | 192   | 167   | 151   | 137   | 242   | 185   | 82    | 259   | 114   | 146    | Sh3bp1   |
| Sh3bp2   | 845   | 869   | 1209  | 1208  | 1713  | 1380  | 1281  | 2078  | 2464  | 2669  | 2201  | 2588  | 2209  | 2245  | 771   | 863   | 1169  | 1213  | 1633  | 1216  | 1314  | 2767  | 2481  | 2633  | 2962  | 2585  | 2294  | 2293   | Sh3bp2   |
| Sh3bp4   | 4523  | 4964  | 4196  | 4259  | 4105  | 4140  | 3718  | 2282  | 3002  | 2506  | 2698  | 2754  | 2784  | 2447  | 4236  | 4889  | 4580  | 4185  | 4390  | 3632  | 3706  | 2237  | 3128  | 2364  | 2508  | 2923  | 2769  | 2623   | Sh3bp4   |
| Sh3bp5   | 2407  | 2208  | 2669  | 3023  | 4997  | 3881  | 3774  | 6149  | 6363  | 7592  | 7241  | 5702  | 5818  | 6208  | 2767  | 2657  | 2814  | 3728  | 3820  | 3142  | 4058  | 8734  | 6524  | 6959  | 8508  | 5401  | 5069  | 5478   | Sh3bp5   |
| Sh3bpb5l | 3862  | 5038  | 4400  | 4787  | 4430  | 4112  | 3999  | 3284  | 3425  | 3713  | 3529  | 3995  | 3705  | 3723  | 3703  | 3953  | 4485  | 4642  | 4446  | 4269  | 4236  | 3436  | 3289  | 3892  | 4124  | 4201  | 3995  | 3881   | Sh3bpb5l |
| Sh3d19   | 1911  | 1625  | 1757  | 1329  | 1633  | 1627  | 1038  | 2093  | 2352  | 2471  | 2788  | 1900  | 2299  | 1909  | 1673  | 2293  | 1387  | 1699  | 1216  | 1075  | 1045  | 2378  | 2807  | 2097  | 2037  | 2128  | 1869  | 1790   | Sh3d19   |
| Sh3d21   | 212   | 188   | 118   | 167   | 65    | 111   | 58    | 173   | 265   | 171   | 342   | 148   | 308   | 137   | 160   | 211   | 108   | 158   | 86    | 69    | 66    | 162   | 271   | 204   | 143   | 210   | 159   | 139    | Sh3d21   |
| Sh3gl1   | 4452  | 5732  | 5374  | 4879  | 4217  | 4335  | 3867  | 3322  | 4226  | 3943  | 4227  | 4289  | 4038  | 3841  | 4146  | 5196  | 5060  | 4796  | 4545  | 3891  | 3816  | 3549  | 4361  | 4193  | 3870  | 4974  | 3812  | 3986   | Sh3gl1   |
| Sh3gl2   | 1034  | 1091  | 806   | 1439  | 2645  | 1825  | 2018  | 2287  | 2340  | 2315  | 1961  | 1466  | 1496  | 1560  | 1396  | 1026  | 1342  | 1808  | 1948  | 2125  | 2197  | 2525  | 2256  | 1839  | 2410  | 1227  | 1335  | 1318   | Sh3gl2   |
| Sh3gl3   | 1381  | 1131  | 906   | 1211  | 1501  | 1378  | 1560  | 1414  | 1207  | 1124  | 1160  | 925   | 944   | 1027  | 1447  | 1379  | 1301  | 1324  | 1326  | 1524  | 1541  | 1343  | 1170  | 1078  | 1198  | 925   | 797   | 882    | Sh3gl3   |
| Sh3glb1  | 13093 | 11410 | 12355 | 15932 | 18722 | 17131 | 18710 | 15478 | 14294 | 16316 | 16663 | 14672 | 14666 | 15081 | 14126 | 12025 | 14442 | 17164 | 16818 | 14815 | 19006 | 18870 | 15305 | 14309 | 16865 | 12292 | 13716 | 14658  | Sh3glb1  |
| Sh3glb2  | 4231  | 6020  | 5184  | 6745  | 6985  | 6250  | 6050  | 4123  | 4969  | 5159  | 4832  | 5184  | 4622  | 4515  | 4456  | 5337  | 6519  | 7141  | 7335  | 6299  | 5881  | 5150  | 4699  | 4905  | 5643  | 4629  | 4468  | 3925   | Sh3glb2  |
| Sh3kbp1  | 2426  | 2233  | 2429  | 2585  | 3427  | 2662  | 2842  | 3396  | 3170  | 3591  | 3300  | 2910  | 3002  | 2823  | 2633  | 2414  | 2687  | 2630  | 2840  | 3050  | 2796  | 3703  | 3510  | 3151  | 3386  | 2658  | 2683  | 2747   | Sh3kbp1  |
| Sh3pdx2a | 7623  | 7924  | 8451  | 9138  | 8571  | 9081  | 7287  | 8197  | 11385 | 12222 | 11078 | 11511 | 11578 | 10097 | 6674  | 10008 | 8413  | 10124 | 8507  | 6111  | 7513  | 13008 | 12951 | 12936 | 11177 | 8199  | 9646  | 9378   | Sh3pdx2a |
| Sh3pdx2b | 4710  | 5357  | 6702  | 5958  | 7333  | 6500  | 5392  | 7910  | 9264  | 10819 | 11479 | 11519 | 10929 | 10522 | 4627  | 5629  | 6983  | 6714  | 7174  | 4716  | 5870  | 11939 | 9499  | 11122 | 11163 | 8890  | 10696 | 11065  | Sh3pdx2b |
| Sh3rf1   | 3291  | 3455  | 3797  | 5103  | 6233  | 6500  | 5556  | 4914  | 5447  | 5437  | 4300  | 5395  | 4101  | 5151  | 3339  | 3026  | 4653  | 5418  | 5947  | 4815  | 5596  | 5746  | 3955  | 5489  | 6030  | 5153  | 4120  | 4923   | Sh3rf1   |
| Sh3rf2   | 45    | 28    | 15    | 7     | 9     | 41    | 4     | 73    | 143   | 86    | 114   | 30    | 70    | 44    | 32    | 37    | 12    | 14    | 0     | 8     | 7     | 23    | 142   | 38    | 42    | 44    | 37    | 36     | Sh3rf2   |
| Sh3rf3   | 497   | 572   | 289   | 883   | 1267  | 955   | 1207  | 979   | 1226  | 1427  | 1222  | 1147  | 494   | 1060  | 514   | 431   | 680   | 1059  | 1216  | 864   | 1271  | 1414  | 888   | 1477  | 1677  | 918   | 608   | 606    | Sh3rf3   |
| Sh3tc1   | 216   | 240   | 256   | 199   | 236   | 221   | 148   | 212   | 204   | 337   | 362   | 339   | 373   | 270   | 190   | 283   | 220   | 250   | 246   | 179   | 190   | 314   | 381   | 310   | 242   | 324   | 352   | 255    | Sh3tc1   |
| Sh3tc2   | 113   | 109   | 86    | 50    | 83    | 97    | 50    | 222   | 290   | 263   | 265   | 176   | 344   | 223   | 100   | 159   | 82    | 51    | 56    | 61    | 50    | 212   | 306   | 190   | 199   | 203   | 215   | 271    | Sh3tc2   |
| Sh3yl1   | 1257  | 1292  | 1543  | 1713  | 1938  | 1572  | 1797  | 1040  | 1004  | 1277  | 1023  | 979   | 1083  | 1119  | 1275  | 1257  | 1664  | 1573  | 1869  | 1663  | 1820  | 1245  | 1022  | 1074  | 1232  | 992   | 883   | 1102   | Sh3yl1   |
| Shank1   | 3693  | 5061  | 5452  | 9236  | 12842 | 9150  | 9524  | 7013  | 8700  | 12888 | 9735  | 8246  | 7091  | 7619  | 3885  | 3991  | 7967  | 10385 | 11727 | 7752  | 10652 | 14775 | 7130  | 11003 | 12670 | 5988  | 6394  | 6421   | Shank1   |
| Shank2   | 676   | 707   | 941   | 1386  | 2099  | 1466  | 1558  | 2394  | 2478  | 3807  | 2830  | 2860  | 2134  | 2701  | 674   | 673   | 1218  | 1473  | 1838  | 1323  | 1725  | 4423  | 2454  | 3210  | 4175  | 1924  | 2244  | 2312   | Shank2   |
| Shank3   | 1768  | 2421  | 3154  | 2932  | 3379  | 2521  | 2359  | 1921  | 2491  | 3022  | 3066  | 2482  | 2383  | 2118  | 1614  | 2192  | 3203  | 3006  | 3173  | 2007  | 2450  | 3472  | 2431  | 2247  | 2744  | 2296  | 2009  | Shank3 |          |
| Sharpin  | 1880  | 2323  | 2526  | 2823  | 2491  | 2216  | 2414  | 1801  | 1865  | 2127  | 2018  | 2196  | 1966  | 2084  | 1876  | 1964  | 2619  | 2597  | 2627  | 2294  | 2578  | 2146  | 1781  | 2247  | 2282  | 2099  | 2050  | 1958   | Sharpin  |
| Shb      | 1510  | 2031  | 1728  | 2820  | 2548  | 2159  | 2405  | 1051  | 1328  | 1569  | 1256  | 1452  | 687   | 1537  | 1542  | 1455  | 2421  | 2649  | 2544  | 1927  | 2716  | 1399  | 1041  | 1776  | 1788  | 1791  | 938   | 1138   | Shb      |
| Shbg     | 3     | 1     | 3     | 6     | 0     | 2     | 0     | 0     | 0     | 0     | 0     | 0     | 1     | 3     | 0     | 2     | 0     | 6     | 3     | 0     | 0     | 2     | 0     | 0     | 0     | 0     | 0     | 0      | Shbg     |
| Shc1     | 5980  | 5596  | 6008  | 4419  | 3533  | 3638  | 2653  | 3604  | 4631  | 4279  | 5851  | 3447  | 4547  | 3299  | 5003  | 7208  | 4845  | 4735  | 3098  | 2917  | 2767  | 3887  | 5310  | 4102  | 3404  | 4742  | 3799  | 3646   | Shc1     |
| Shc2     | 1715  | 1709  | 2324  | 2050  | 2714  | 2092  | 1771  | 2843  | 2974  | 3150  | 3219  | 2620  | 3357  | 2285  | 1809  | 2152  | 2283  | 2155  | 2155  | 1789  | 1860  | 3758  | 2731  | 2582  | 3089  | 2419  | 2791  | 2667   | Shc2     |
| Shc3     | 606   | 551   | 214   | 563   | 552   | 658   | 518   | 640   | 798   | 647   | 523   | 683   | 584   | 713   | 454   | 483   | 338   | 536   | 496   | 554   | 689   | 476   | 627   | 382   | 786   | 288   | 790   | 623    | Shc3     |
| Shc4     | 235   | 228   | 230   | 236   | 373   | 212   | 216   | 424   | 430   | 480   | 460   | 283   | 480   | 364   | 285   | 253   | 287   | 233   | 279   | 217   | 224   | 617   | 389   | 340   | 448   | 328   | 274   | 278    | Shc4     |
| Shcbp1   | 4035  | 2612  | 4015  | 2396  | 1999  | 2720  | 2990  | 3197  | 2946  | 2403  | 2346  | 3894  | 3521  | 4173  | 3520  | 3280  | 3082  | 2310  | 2549  | 3404  | 2540  | 2090  | 2573  | 3290  | 2744  | 5168  | 4136  | 4139   | Shcbp1   |
| Shcbp1l  | 60    | 74    | 51    | 40    | 84    | 45    | 56    | 39    | 37    | 41    | 44    | 25    | 24    | 28    | 62    | 66    | 44    | 63    | 33    | 58    | 45    | 22    | 33    | 29    | 43    | 20    | 17    | 19     | Shcbp1l  |
| Shd      | 1692  | 2507  | 2495  | 2207  | 2934  | 270   |       |       |       |       |       |       |       |       |       |       |       |       |       |       |       |       |       |       |       |       |       |        |          |



|         |       |       |       |       |       |       |       |      |      |      |      |       |      |       |       |       |       |       |       |       |       |      |      |      |      |       |       |         |         |
|---------|-------|-------|-------|-------|-------|-------|-------|------|------|------|------|-------|------|-------|-------|-------|-------|-------|-------|-------|-------|------|------|------|------|-------|-------|---------|---------|
| Shroom4 | 2456  | 1887  | 1674  | 1655  | 1433  | 1912  | 1330  | 2225 | 2426 | 2311 | 2553 | 2135  | 2827 | 2055  | 1904  | 2303  | 1499  | 1647  | 1399  | 1255  | 1364  | 1793 | 2346 | 1985 | 1870 | 1729  | 2396  | 2181    | Shroom4 |
| Shtn1   | 1983  | 1915  | 912   | 3140  | 4943  | 3285  | 4883  | 4076 | 4384 | 4463 | 3680 | 2250  | 1482 | 2397  | 2289  | 1548  | 2589  | 4043  | 4012  | 3506  | 4720  | 5185 | 3579 | 3888 | 5012 | 2986  | 1548  | 1608    | Shtn1   |
| Siae    | 1608  | 1832  | 1410  | 1511  | 1363  | 1537  | 1552  | 1299 | 1247 | 1191 | 1162 | 1057  | 1052 | 1053  | 1991  | 1691  | 1358  | 1588  | 1361  | 1618  | 1491  | 1201 | 1350 | 888  | 939  | 969   | 1065  | 1013    | Siae    |
| Siah1a  | 1675  | 1409  | 1993  | 1962  | 2140  | 1851  | 2138  | 3226 | 2669 | 3198 | 2846 | 3331  | 2986 | 3397  | 1767  | 1477  | 1865  | 1763  | 2193  | 1855  | 1974  | 3507 | 2895 | 3244 | 3432 | 3476  | 3323  | 3404    | Siah1a  |
| Siah1b  | 942   | 907   | 1056  | 686   | 504   | 536   | 745   | 953  | 866  | 866  | 837  | 1227  | 1090 | 1253  | 831   | 769   | 858   | 527   | 657   | 784   | 632   | 750  | 822  | 1058 | 909  | 1476  | 1238  | 1266    | Siah1b  |
| Siah2   | 935   | 1094  | 913   | 1107  | 981   | 923   | 974   | 540  | 539  | 637  | 569  | 512   | 538  | 529   | 961   | 977   | 1046  | 1124  | 1100  | 815   | 1014  | 590  | 550  | 545  | 572  | 712   | 488   | 522     | Siah2   |
| Siah3   | 1031  | 1159  | 859   | 1461  | 1856  | 1831  | 1901  | 1633 | 1769 | 1914 | 1538 | 2149  | 1589 | 2121  | 1229  | 827   | 1291  | 1955  | 1931  | 1906  | 1671  | 1480 | 2232 | 2390 | 1968 | 1578  | 1805  | Siah3   |         |
| Sidt1   | 40    | 41    | 34    | 61    | 155   | 105   | 91    | 147  | 201  | 219  | 208  | 84    | 99   | 98    | 58    | 57    | 60    | 94    | 106   | 157   | 140   | 227  | 324  | 100  | 151  | 75    | 51    | 55      | Sidt1   |
| Sidt2   | 5785  | 6681  | 6586  | 6902  | 6551  | 6400  | 6053  | 4158 | 5321 | 5163 | 5822 | 4780  | 5172 | 4251  | 5483  | 6418  | 6291  | 7287  | 6710  | 5216  | 5999  | 5668 | 5422 | 5082 | 4900 | 4503  | 4443  | 4330    | Sidt2   |
| Sigirr  | 46    | 48    | 46    | 39    | 39    | 28    | 42    | 74   | 89   | 98   | 105  | 70    | 94   | 90    | 37    | 51    | 52    | 51    | 61    | 39    | 42    | 79   | 129  | 123  | 74   | 125   | 85    | 70      | Sigirr  |
| Siglec1 | 27    | 52    | 40    | 81    | 65    | 42    | 49    | 23   | 58   | 56   | 116  | 78    | 61   | 63    | 42    | 61    | 38    | 96    | 30    | 62    | 84    | 77   | 113  | 96   | 107  | 31    | 65    | 58      | Siglec1 |
| Siglece | 13    | 10    | 2     | 7     | 7     | 9     | 8     | 17   | 26   | 9    | 22   | 13    | 19   | 16    | 17    | 9     | 5     | 19    | 2     | 13    | 13    | 15   | 30   | 27   | 6    | 23    | 23    | 14      | Siglece |
| Siglecj | 6     | 3     | 9     | 2     | 1     | 1     | 1     | 9    | 8    | 6    | 13   | 7     | 19   | 6     | 4     | 7     | 1     | 7     | 0     | 5     | 0     | 12   | 7    | 11   | 6    | 8     | 14    | 12      | Siglecj |
| Siglecg | 1     | 1     | 2     | 0     | 2     | 1     | 0     | 1    | 7    | 1    | 16   | 1     | 9    | 10    | 0     | 2     | 3     | 1     | 1     | 5     | 4     | 3    | 6    | 7    | 0    | 4     | 6     | 0       | Siglecg |
| Siglech | 50    | 68    | 50    | 38    | 64    | 64    | 61    | 87   | 85   | 67   | 86   | 60    | 93   | 62    | 59    | 45    | 28    | 88    | 75    | 93    | 60    | 74   | 80   | 85   | 58   | 82    | 84    | 77      | Siglech |
| Sigmar1 | 3051  | 3806  | 3639  | 3243  | 2531  | 2861  | 2437  | 1716 | 2075 | 1966 | 2143 | 2038  | 2175 | 1943  | 2736  | 3502  | 3271  | 2941  | 2632  | 2444  | 2399  | 1813 | 2155 | 2136 | 1728 | 2666  | 2148  | 2308    | Sigmar1 |
| Sik1    | 2225  | 2977  | 3121  | 3627  | 3257  | 3025  | 2607  | 1878 | 2251 | 2611 | 2877 | 2501  | 2282 | 2270  | 2230  | 2854  | 3497  | 3807  | 3277  | 2547  | 2829  | 2451 | 2267 | 2526 | 2643 | 2545  | 2116  | 2140    | Sik1    |
| Sik2    | 3047  | 3128  | 2261  | 3277  | 3342  | 3294  | 3344  | 1839 | 2230 | 1863 | 1910 | 1861  | 1761 | 1836  | 2852  | 3141  | 2680  | 3122  | 2999  | 2769  | 3382  | 1803 | 1946 | 1766 | 2044 | 948   | 1654  | 1717    | Sik2    |
| Sik3    | 4008  | 4647  | 4983  | 5546  | 5610  | 5199  | 4952  | 3153 | 3834 | 4489 | 4488 | 4553  | 4155 | 4254  | 3699  | 4588  | 5481  | 5355  | 5813  | 4161  | 5220  | 4647 | 3823 | 4434 | 4486 | 4054  | 4140  | 4315    | Sik3    |
| Sike1   | 9812  | 9316  | 8864  | 9861  | 9745  | 10066 | 10445 | 8626 | 7633 | 8269 | 7685 | 9121  | 8930 | 9394  | 9948  | 9002  | 9471  | 9255  | 9369  | 9396  | 10467 | 9337 | 7642 | 7951 | 8899 | 7165  | 9581  | 8837    | Sike1   |
| Sil1    | 592   | 657   | 592   | 526   | 620   | 574   | 550   | 761  | 824  | 762  | 792  | 875   | 917  | 806   | 580   | 581   | 546   | 585   | 614   | 588   | 588   | 772  | 882  | 829  | 798  | 902   | 891   | 849     | Sil1    |
| Sim1    | 1225  | 824   | 1159  | 1040  | 804   | 1175  | 1509  | 1366 | 1220 | 941  | 933  | 1715  | 629  | 1566  | 1092  | 537   | 1133  | 989   | 967   | 1404  | 1127  | 1322 | 1157 | 1396 | 1327 | 1387  | 1883  | 1772    | Sim1    |
| Sim2    | 160   | 141   | 351   | 85    | 90    | 66    | 135   | 245  | 406  | 186  | 620  | 307   | 67   | 283   | 80    | 188   | 236   | 107   | 120   | 133   | 92    | 346  | 339  | 220  | 137  | 397   | 421   | 313     | Sim2    |
| Simc1   | 2933  | 2845  | 2182  | 2143  | 2875  | 3025  | 2789  | 3388 | 3172 | 2784 | 2722 | 2725  | 2608 | 2612  | 2956  | 2517  | 2356  | 2486  | 2707  | 3046  | 2958  | 3253 | 2862 | 2659 | 2899 | 2390  | 2521  | 2359    | Simc1   |
| Sin3a   | 17935 | 18382 | 15795 | 16437 | 14162 | 15435 | 16355 | 9774 | 9014 | 9062 | 8358 | 10766 | 9816 | 10851 | 16870 | 16333 | 15302 | 15418 | 15007 | 15984 | 16562 | 9214 | 8617 | 9446 | 9401 | 10570 | 11023 | 10710   | Sin3a   |
| Sin3b   | 6339  | 8033  | 6976  | 7557  | 7189  | 6877  | 6281  | 6662 | 7097 | 6823 | 7012 | 6982  | 6690 | 6780  | 5880  | 6779  | 7249  | 7613  | 7366  | 7104  | 6606  | 7167 | 6894 | 7209 | 7809 | 6680  | 6839  | 6694    | Sin3b   |
| Sinhcaf | 6521  | 6049  | 7592  | 5850  | 5558  | 5894  | 5729  | 8120 | 6367 | 5699 | 5566 | 9517  | 8536 | 9787  | 6727  | 5830  | 6920  | 5351  | 6081  | 6963  | 5647  | 6137 | 5854 | 7547 | 7165 | 10617 | 10379 | 10237   | Sinhcaf |
| Sipa1   | 2708  | 3302  | 3649  | 3169  | 2450  | 2391  | 2125  | 1588 | 1949 | 2245 | 2877 | 2310  | 2469 | 1901  | 2211  | 3338  | 3320  | 3007  | 2689  | 1981  | 2047  | 2343 | 2421 | 2408 | 2141 | 2715  | 2255  | 1830    | Sipa1   |
| Sipa1l1 | 6384  | 6713  | 6323  | 6058  | 6229  | 6025  | 6697  | 5428 | 6337 | 6215 | 5919 | 7352  | 6734 | 7055  | 5672  | 6300  | 6451  | 6343  | 6770  | 5822  | 6157  | 5374 | 5829 | 6452 | 6107 | 5748  | 7044  | 7085    | Sipa1l1 |
| Sipa1l2 | 9231  | 11487 | 10907 | 14030 | 12931 | 12160 | 11863 | 6278 | 6680 | 8174 | 6958 | 8233  | 6923 | 7960  | 9415  | 10618 | 12429 | 13861 | 13683 | 10262 | 13030 | 7554 | 6539 | 8067 | 8631 | 5630  | 7160  | 7554    | Sipa1l2 |
| Sipa1l3 | 3516  | 4755  | 5395  | 5813  | 5657  | 4436  | 4024  | 2010 | 2632 | 3228 | 2862 | 2485  | 2353 | 3231  | 4245  | 5867  | 5753  | 5452  | 3628  | 4618  | 3081  | 3081 | 2598 | 3310 | 2685 | 2183  | 2204  | Sipa1l3 |         |
| Sirpa   | 1504  | 1568  | 1921  | 1929  | 2557  | 2325  | 2399  | 2464 | 3174 | 3303 | 3507 | 3058  | 2954 | 2748  | 1535  | 1673  | 1950  | 1946  | 2596  | 2106  | 2323  | 3444 | 3124 | 3392 | 3263 | 3248  | 2666  | 2582    | Sirpa   |
| Sirpb1b | 0     | 0     | 0     | 0     | 0     | 0     | 0     | 0    | 0    | 0    | 2    | 0     | 0    | 0     | 0     | 0     | 0     | 0     | 0     | 0     | 0     | 2    | 0    | 0    | 0    | 0     | 0     | 0       | Sirpb1b |
| Sirpb1c | 0     | 0     | 0     | 0     | 0     | 0     | 0     | 0    | 0    | 0    | 0    | 0     | 0    | 0     | 0     | 0     | 0     | 0     | 0     | 0     | 0     | 0    | 0    | 0    | 0    | 0     | 0     | 0       | Sirpb1c |
| Sirt1   | 2873  | 2198  | 2962  | 2564  | 2525  | 2869  | 2887  | 4412 | 3704 | 3462 | 3693 | 4367  | 4187 | 4221  | 2927  | 2700  | 2641  | 2732  | 2608  | 2674  | 2806  | 4304 | 3624 | 3645 | 3872 | 4107  | 4495  | 4196    | Sirt1   |
| Sirt2   | 5936  | 7862  | 6613  | 7190  | 6814  | 7277  | 6643  | 4593 | 5059 | 5227 | 5134 | 4993  | 4788 | 4980  | 6306  | 6655  | 6942  | 6888  | 7355  | 6980  | 7234  | 5041 | 4994 | 5212 | 5283 | 4613  | 4822  | 4755    | Sirt2   |
| Sirt3   | 1249  | 1284  | 1127  | 1194  | 1244  | 1359  | 1158  | 1373 | 1230 | 1264 | 1264 | 1266  | 1438 | 1297  | 1212  | 1156  | 1218  | 1140  | 1281  | 1289  | 1181  | 1190 | 1357 | 1174 | 1342 | 1135  | 1463  | 1246    | Sirt3   |
| Sirt4   | 839   | 1122  | 1487  | 1507  | 1334  | 1345  | 1347  | 839  | 910  | 1204 | 1229 | 1044  | 1112 | 1111  | 931   | 1057  | 1610  | 1595  | 1542  | 1158  | 1366  | 1091 | 975  | 1334 | 1169 | 1187  | 1091  | 1072    | Sirt4   |
| Sirt5   | 511   | 416   | 363   | 407   | 549   | 567   | 489   | 906  | 1021 | 930  | 939  | 919   | 903  | 930   | 463   | 505   | 459   | 427   | 510   | 567   | 514   | 759  | 872  | 901  | 822  | 879   | 904   | 889     | Sirt5   |
| Sirt6   | 1359  | 1591  | 2078  | 1905  | 2002  | 1684  | 1673  | 2049 | 2385 | 2765 | 2789 | 3125  | 2874 | 2948  | 1280  | 1357  | 2089  | 1747  | 2253  | 1543  | 1646  | 2677 | 2244 | 3331 | 3060 | 3520  | 2960  | 2887    | Sirt6   |
| Sirt7   | 2996  | 3777  | 3420  | 4141  | 3242  | 3192  | 3431  | 1944 | 2140 | 2326 | 2021 | 2387  | 2241 | 2224  | 3029  | 3421  | 3658  | 3760  | 3478  | 3001  | 3204  | 2288 | 2005 | 2355 | 2543 | 2193  | 2272  | 2301    | Sirt7   |
| Sis     | 1     | 0     | 0     | 0     | 2     | 3     | 0     | 5    | 2    | 1    | 0    | 0     | 0    | 0     | 0     | 1     | 1     | 0     | 0     | 0     | 2     | 0    | 0    | 0    | 0    | 1     | 1     | 2       | Sis     |
| Sit1    | 0     | 2     | 0     | 0     | 0     | 0     | 0     | 0    | 0    | 0    | 1    | 0     | 0    | 0     | 0     | 1     | 1     | 0     | 0     | 0     | 0     | 0    | 0    | 0    | 0    | 0     | 0     | 0       | Sit1    |
| Siva1   | 3089  | 3860  | 3251  | 2835  | 2046  | 2408  | 2475  | 1684 | 1903 | 1628 | 1668 | 2130  | 1997 | 1984  | 2745  | 3291  | 2971  | 2752  | 2586  | 3148  | 2308  | 1158 | 1774 | 1959 | 1610 | 2657  | 2273  | 2249    | Siva1   |
| Six1    | 1937  | 1147  | 1043  | 922   | 552   | 456   | 54    | 2127 | 2160 | 2145 | 3188 | 1018  | 2176 | 1117  | 1561  | 2172  | 822   | 800   | 104   | 73    | 63    | 2251 | 2476 | 2032 | 1154 | 2634  | 1328  | 1232    | Six1    |
| Six2    | 2992  | 2443  | 1858  | 1428  | 352   | 673   | 156   | 2032 | 2364 | 2408 | 2435 | 1757  | 2663 | 1675  | 1907  | 3702  | 1417  | 1100  | 129   | 94    | 116   | 1726 | 1865 | 2947 | 1181 | 5216  | 1857  | 2114    | Six2    |
| Six3    | 1761  | 1597  | 2198  | 2412  | 1829  | 1583  | 2265  | 1578 | 1429 | 2023 | 1216 | 2560  | 933  | 2684  | 1229  | 849   | 2484  | 2133  | 2381  | 1480  | 2428  | 2191 | 967  | 2764 | 2281 | 3152  | 2133  | 2467    | Six3    |
| Six4    | 1707  | 1230  | 1337  | 1215  | 1019  | 1050  | 883   | 1034 | 959  | 925  | 1316 | 573   | 1014 | 669   | 1389  | 1840  | 1320  | 1140  | 844   | 770   | 826   | 834  | 1060 | 908  | 494  | 1089  | 636   | 673     | Six4    |
| Six5    | 1034  | 1236  | 1432  | 1065  | 791   | 936   | 826   | 1638 | 2150 | 1873 | 2011 | 1894  | 2033 | 1787  | 902   | 1061  | 1373  | 1029  | 1012  | 801   | 810   | 1602 | 2050 | 2005 | 1461 | 2     |       |         |         |

|            |       |      |      |      |      |      |      |      |      |      |      |      |      |      |       |       |      |      |      |      |      |       |      |      |      |      |      |      |            |         |
|------------|-------|------|------|------|------|------|------|------|------|------|------|------|------|------|-------|-------|------|------|------|------|------|-------|------|------|------|------|------|------|------------|---------|
| Slc10a4-ps | 74    | 71   | 129  | 92   | 104  | 70   | 92   | 106  | 72   | 66   | 102  | 99   | 90   | 74   | 87    | 86    | 97   | 76   | 79   | 101  | 80   | 135   | 72   | 84   | 68   | 95   | 127  | 91   | Slc10a4-ps |         |
| Slc10a5    | 1     | 9    | 0    | 7    | 4    | 10   | 4    | 10   | 2    | 3    | 1    | 0    | 0    | 3    | 8     | 6     | 6    | 8    | 1    | 4    | 3    | 0     | 6    | 5    | 0    | 0    | 3    | 0    | Slc10a5    |         |
| Slc10a6    | 6     | 3    | 0    | 1    | 7    | 5    | 3    | 7    | 9    | 14   | 20   | 3    | 8    | 2    | 16    | 9     | 2    | 12   | 5    | 6    | 3    | 12    | 21   | 1    | 3    | 7    | 6    | 1    | Slc10a6    |         |
| Slc10a7    | 2145  | 1896 | 1939 | 1792 | 1685 | 1674 | 1507 | 1688 | 1740 | 1510 | 1840 | 1377 | 1564 | 1497 | 2077  | 2051  | 1802 | 1843 | 1585 | 1734 | 1483 | 1542  | 1726 | 1638 | 1494 | 1491 | 1597 | 1475 | Slc10a7    |         |
| Slc11a1    | 63    | 97   | 46   | 66   | 92   | 66   | 66   | 81   | 110  | 74   | 111  | 85   | 64   | 69   | 66    | 90    | 93   | 91   | 44   | 101  | 63   | 100   | 151  | 89   | 96   | 88   | 113  | 82   | Slc11a1    |         |
| Slc11a2    | 4805  | 6025 | 4557 | 4944 | 5044 | 5071 | 4671 | 2950 | 3063 | 2901 | 2959 | 3104 | 3269 | 2938 | 5021  | 5462  | 4717 | 4845 | 4763 | 4958 | 4975 | 3014  | 2708 | 2799 | 3224 | 2812 | 3205 | 2890 | Slc11a2    |         |
| Slc12a1    | 5     | 4    | 1    | 1    | 18   | 7    | 6    | 6    | 16   | 16   | 12   | 3    | 8    | 1    | 5     | 3     | 1    | 4    | 4    | 4    | 10   | 7     | 9    | 3    | 11   | 1    | 8    | 2    | Slc12a1    |         |
| Slc12a2    | 11557 | 8524 | 8296 | 8955 | 8500 | 9684 | 8948 | 9297 | 9245 | 7680 | 8783 | 8525 | 9069 | 8520 | 10925 | 11009 | 7946 | 9575 | 7733 | 8448 | 8896 | 8199  | 8862 | 7817 | 7435 | 7558 | 8498 | 7937 | Slc12a2    |         |
| Slc12a3    | 115   | 193  | 75   | 208  | 174  | 161  | 152  | 31   | 28   | 34   | 36   | 26   | 36   | 20   | 187   | 206   | 170  | 177  | 140  | 117  | 160  | 57    | 20   | 16   | 24   | 17   | 20   | 20   | Slc12a3    |         |
| Slc12a4    | 1661  | 1542 | 1415 | 1135 | 1013 | 1144 | 763  | 1376 | 2097 | 1865 | 2486 | 1372 | 1579 | 1041 | 1185  | 1981  | 1217 | 1330 | 990  | 643  | 761  | 1432  | 2235 | 1615 | 1159 | 1467 | 1226 | 1182 | Slc12a4    |         |
| Slc12a5    | 1393  | 2075 | 2259 | 3925 | 5960 | 4277 | 4242 | 2998 | 3040 | 4516 | 3572 | 2628 | 2584 | 2683 | 1731  | 1688  | 3406 | 4725 | 5260 | 3777 | 4837 | 5650  | 2703 | 3604 | 4794 | 1594 | 2277 | 2099 | Slc12a5    |         |
| Slc12a6    | 3593  | 3207 | 3174 | 3717 | 4115 | 3943 | 4580 | 3559 | 3261 | 3520 | 3592 | 3338 | 3590 | 3750 | 3659  | 3343  | 3415 | 3970 | 3634 | 3807 | 4552 | 4231  | 3219 | 3326 | 3803 | 3127 | 3141 | 3475 | Slc12a6    |         |
| Slc12a7    | 7636  | 8082 | 7037 | 6646 | 6513 | 6487 | 5761 | 4284 | 4879 | 4690 | 4309 | 6402 | 6179 | 5756 | 6672  | 8273  | 6769 | 6091 | 6694 | 5665 | 5909 | 4050  | 4104 | 4814 | 4623 | 5720 | 6316 | 5658 | Slc12a7    |         |
| Slc12a8    | 66    | 52   | 53   | 43   | 43   | 37   | 58   | 57   | 68   | 61   | 48   | 54   | 71   | 63   | 34    | 47    | 57   | 76   | 48   | 49   | 44   | 37    | 65   | 58   | 39   | 89   | 89   | 69   | Slc12a8    |         |
| Slc12a9    | 2555  | 3770 | 3677 | 4320 | 3744 | 3428 | 3023 | 1492 | 1859 | 1949 | 1968 | 1956 | 2056 | 1735 | 2623  | 3422  | 4035 | 4043 | 3963 | 2989 | 3128 | 2151  | 1689 | 2025 | 2143 | 1785 | 2007 | 1626 | Slc12a9    |         |
| Slc13a1    | 0     | 0    | 0    | 2    | 0    | 0    | 0    | 2    | 3    | 0    | 1    | 1    | 0    | 0    | 1     | 0     | 0    | 1    | 0    | 1    | 0    | 2     | 1    | 0    | 0    | 0    | 0    | 0    | 0          | Slc13a1 |
| Slc13a2    | 1     | 0    | 0    | 0    | 0    | 0    | 0    | 0    | 1    | 0    | 0    | 0    | 1    | 0    | 0     | 0     | 0    | 3    | 0    | 1    | 0    | 5     | 1    | 1    | 0    | 1    | 1    | 4    | Slc13a2    |         |
| Slc13a3    | 59    | 97   | 60   | 90   | 159  | 100  | 106  | 118  | 131  | 144  | 133  | 112  | 67   | 121  | 59    | 65    | 107  | 120  | 129  | 110  | 108  | 132   | 159  | 133  | 143  | 119  | 121  | 119  | Slc13a3    |         |
| Slc13a4    | 20    | 71   | 51   | 54   | 204  | 112  | 69   | 103  | 171  | 106  | 226  | 64   | 78   | 20   | 58    | 65    | 51   | 123  | 72   | 119  | 120  | 184   | 290  | 83   | 144  | 27   | 21   | 37   | Slc13a4    |         |
| Slc13a5    | 135   | 156  | 168  | 108  | 151  | 204  | 152  | 56   | 80   | 89   | 105  | 62   | 75   | 29   | 142   | 164   | 149  | 131  | 155  | 182  | 135  | 105   | 69   | 62   | 96   | 24   | 48   | 39   | Slc13a5    |         |
| Slc14a1    | 12    | 7    | 8    | 3    | 11   | 8    | 4    | 4    | 10   | 1    | 18   | 5    | 18   | 13   | 21    | 13    | 9    | 8    | 7    | 14   | 13   | 3     | 78   | 12   | 6    | 19   | 20   | 11   | Slc14a1    |         |
| Slc14a2    | 66    | 85   | 44   | 83   | 90   | 78   | 95   | 123  | 161  | 135  | 110  | 164  | 129  | 161  | 55    | 63    | 49   | 97   | 91   | 106  | 99   | 132   | 179  | 186  | 187  | 180  | 121  | 123  | Slc14a2    |         |
| Slc15a1    | 3     | 5    | 4    | 4    | 2    | 2    | 1    | 5    | 4    | 1    | 5    | 5    | 5    | 2    | 5     | 2     | 0    | 0    | 4    | 4    | 1    | 10    | 5    | 0    | 5    | 8    | 1    | 4    | Slc15a1    |         |
| Slc15a2    | 1037  | 1679 | 1092 | 713  | 1359 | 2569 | 2954 | 2794 | 784  | 1798 | 2091 | 807  | 1812 | 1044 | 849   | 1467  | 1873 | 438  | 388  | 1622 | 1459 | 1103  | 1139 | 1800 | 1154 | 1214 | 178  | 695  | Slc15a2    |         |
| Slc15a3    | 50    | 34   | 41   | 47   | 30   | 37   | 32   | 64   | 78   | 93   | 105  | 67   | 77   | 77   | 46    | 58    | 29   | 36   | 40   | 37   | 38   | 48    | 124  | 70   | 63   | 68   | 58   | 47   | Slc15a3    |         |
| Slc15a4    | 1444  | 2050 | 1783 | 1801 | 1654 | 1557 | 1519 | 1470 | 1291 | 1193 | 1239 | 1322 | 1313 | 1192 | 1410  | 1769  | 1833 | 1753 | 1771 | 1718 | 1660 | 1337  | 1233 | 1277 | 1434 | 1199 | 1325 | 1267 | Slc15a4    |         |
| Slc15a5    | 1     | 1    | 0    | 0    | 0    | 0    | 0    | 6    | 2    | 6    | 0    | 0    | 1    | 0    | 4     | 2     | 0    | 0    | 1    | 0    | 0    | 2     | 3    | 1    | 0    | 4    | 0    | 0    | Slc15a5    |         |
| Slc16a1    | 4866  | 4367 | 4627 | 3552 | 2408 | 3040 | 2911 | 2209 | 2656 | 1949 | 2165 | 2558 | 2808 | 2456 | 4457  | 4812  | 3576 | 3452 | 2652 | 3266 | 2601 | 1686  | 2558 | 2451 | 1924 | 3297 | 2721 | 2784 | Slc16a1    |         |
| Slc16a10   | 1208  | 1063 | 1146 | 965  | 1249 | 1006 | 893  | 686  | 1026 | 892  | 795  | 953  | 1284 | 581  | 1200  | 1524  | 941  | 1077 | 922  | 882  | 1041 | 917   | 1407 | 510  | 529  | 609  | 535  | 726  | Slc16a10   |         |
| Slc16a11   | 29    | 16   | 16   | 16   | 25   | 15   | 12   | 18   | 33   | 21   | 22   | 16   | 8    | 7    | 24    | 33    | 19   | 24   | 17   | 18   | 14   | 35    | 43   | 38   | 18   | 18   | 10   | 5    | Slc16a11   |         |
| Slc16a12   | 83    | 95   | 105  | 81   | 160  | 135  | 105  | 291  | 280  | 270  | 290  | 343  | 356  | 286  | 136   | 150   | 78   | 118  | 107  | 116  | 113  | 304   | 419  | 274  | 248  | 255  | 274  | 246  | Slc16a12   |         |
| Slc16a13   | 807   | 983  | 1044 | 878  | 919  | 918  | 837  | 927  | 1011 | 889  | 907  | 1139 | 1212 | 1117 | 938   | 822   | 963  | 828  | 934  | 898  | 766  | 994   | 971  | 1072 | 1004 | 1143 | 1191 | 1186 | Slc16a13   |         |
| Slc16a14   | 313   | 301  | 343  | 364  | 512  | 566  | 539  | 944  | 898  | 987  | 791  | 1093 | 1016 | 1155 | 364   | 227   | 298  | 340  | 522  | 457  | 466  | 1044  | 721  | 895  | 1107 | 512  | 1204 | 1057 | Slc16a14   |         |
| Slc16a2    | 3267  | 3155 | 3455 | 3590 | 4981 | 4177 | 4302 | 2906 | 3564 | 3576 | 3841 | 3211 | 3130 | 2949 | 3220  | 3457  | 3603 | 4006 | 4550 | 3761 | 4543 | 4032  | 4442 | 3201 | 3757 | 2898 | 2682 | 2995 | Slc16a2    |         |
| Slc16a3    | 2638  | 2853 | 2888 | 1847 | 1289 | 1735 | 1095 | 729  | 1065 | 961  | 1261 | 806  | 1041 | 873  | 2298  | 2896  | 2575 | 1864 | 1472 | 1464 | 1140 | 662   | 1211 | 1016 | 776  | 1251 | 997  | 1015 | Slc16a3    |         |
| Slc16a4    | 62    | 56   | 65   | 95   | 82   | 109  | 82   | 151  | 246  | 164  | 382  | 126  | 172  | 106  | 99    | 85    | 58   | 117  | 65   | 97   | 64   | 224   | 382  | 104  | 150  | 110  | 114  | 94   | Slc16a4    |         |
| Slc16a5    | 1     | 1    | 0    | 3    | 0    | 0    | 2    | 5    | 2    | 14   | 6    | 0    | 1    | 0    | 0     | 0     | 0    | 0    | 0    | 0    | 0    | 3     | 1    | 1    | 0    | 19   | 0    | 0    | Slc16a5    |         |
| Slc16a6    | 907   | 867  | 1078 | 1011 | 854  | 901  | 813  | 689  | 740  | 823  | 878  | 947  | 1022 | 909  | 935   | 872   | 956  | 965  | 733  | 873  | 702  | 657   | 885  | 852  | 844  | 913  | 900  | 907  | Slc16a6    |         |
| Slc16a7    | 1043  | 921  | 888  | 1013 | 1150 | 1214 | 1116 | 1274 | 1242 | 1032 | 1311 | 723  | 1060 | 815  | 1224  | 1113  | 793  | 1034 | 964  | 1308 | 1090 | 1237  | 1310 | 716  | 980  | 565  | 779  | 781  | Slc16a7    |         |
| Slc16a8    | 0     | 4    | 3    | 7    | 5    | 6    | 0    | 6    | 7    | 1    | 6    | 1    | 3    | 2    | 1     | 2     | 3    | 0    | 3    | 3    | 3    | 8     | 15   | 3    | 1    | 0    | 0    | 0    | Slc16a8    |         |
| Slc16a9    | 131   | 133  | 199  | 155  | 189  | 168  | 115  | 285  | 308  | 209  | 412  | 143  | 276  | 212  | 185   | 168   | 160  | 185  | 93   | 106  | 118  | 463   | 440  | 267  | 343  | 145  | 200  | 189  | Slc16a9    |         |
| Slc17a1    | 0     | 0    | 26   | 8    | 1    | 2    | 4    | 4    | 2    | 0    | 3    | 1    | 6    | 6    | 1     | 0     | 8    | 6    | 5    | 6    | 1    | 5     | 4    | 11   | 8    | 0    | 0    | 17   | Slc17a1    |         |
| Slc17a2    | 3     | 1    | 3    | 6    | 0    | 1    | 6    | 0    | 2    | 1    | 0    | 0    | 2    | 0    | 8     | 5     | 0    | 2    | 0    | 2    | 2    | 0     | 1    | 0    | 2    | 0    | 0    | 0    | Slc17a2    |         |
| Slc17a3    | 1     | 0    | 0    | 0    | 0    | 0    | 0    | 0    | 0    | 0    | 0    | 0    | 0    | 2    | 0     | 3     | 0    | 0    | 0    | 0    | 0    | 2     | 0    | 2    | 0    | 1    | 2    | 0    | 0          | Slc17a3 |
| Slc17a4    | 0     | 0    | 0    | 0    | 1    | 0    | 0    | 0    | 0    | 0    | 2    | 0    | 0    | 0    | 0     | 1     | 0    | 0    | 0    | 0    | 0    | 0     | 0    | 0    | 0    | 0    | 0    | 0    | 2          | Slc17a4 |
| Slc17a5    | 1527  | 1458 | 1318 | 1628 | 1652 | 1749 | 1571 | 1202 | 1243 | 1278 | 1313 | 1170 | 1193 | 1130 | 1495  | 1505  | 1277 | 1618 | 1559 | 1595 | 1582 | 1203  | 1339 | 1218 | 1309 | 1097 | 1169 | 1065 | Slc17a5    |         |
| Slc17a6    | 2249  | 1989 | 2727 | 2757 | 5107 | 4310 | 4605 | 9835 | 6814 | 8282 | 7106 | 8660 | 7571 | 9015 | 3175  | 1674  | 3271 | 2838 | 4886 | 4532 | 4292 | 10418 | 7723 | 7951 | 9448 | 6210 | 8725 | 9322 | Slc17a6    |         |
| Slc17a7    | 656   | 791  | 614  | 1063 | 1206 | 1129 | 1428 | 595  | 829  | 669  | 500  | 686  | 371  | 587  | 609   | 614   | 824  | 1412 | 1565 | 1235 | 1534 | 446   | 546  | 1054 | 1108 | 729  | 440  | 464  | Slc17a7    |         |
| Slc17a8    | 181   | 244  | 363  | 297  | 430  | 381  | 283  | 684  | 406  | 482  | 433  | 388  | 972  | 391  | 390   | 313   | 351  | 303  | 276  | 308  | 266  | 719   | 423  | 265  | 531  | 292  | 493  | 444  | Slc17a8    |         |
| Slc17a9    | 290   | 389  | 319  | 562  | 295  | 328  | 409  | 51   | 45   | 45   | 76   | 66   | 76   | 83   | 268   | 371   | 431  | 544  | 408  | 309  | 410  | 45    | 45   | 96   | 38   | 44   | 70   | 68   | Slc17a9    |         |
| Slc18a1    | 22    | 10   | 15   | 11   | 22   | 18   | 13   | 32   | 25   | 20   | 23   | 33   | 28   | 9    | 5     | 16    | 24   | 9    | 21   | 35   | 13   | 10    | 49   | 18   | 23   | 18   | 21   | 19   | Slc18a1    |         |
| Slc18a2    | 2180  | 2257 | 2100 | 2751 | 29   |      |      |      |      |      |      |      |      |      |       |       |      |      |      |      |      |       |      |      |      |      |      |      |            |         |



|          |       |       |       |       |       |       |       |       |      |      |      |      |      |      |       |       |       |       |       |       |       |      |      |      |      |      |      |         |          |         |
|----------|-------|-------|-------|-------|-------|-------|-------|-------|------|------|------|------|------|------|-------|-------|-------|-------|-------|-------|-------|------|------|------|------|------|------|---------|----------|---------|
| Sic27a3  | 618   | 796   | 801   | 841   | 838   | 764   | 599   | 1354  | 1801 | 1810 | 1939 | 1405 | 1666 | 1208 | 686   | 872   | 827   | 854   | 863   | 576   | 594   | 1760 | 1726 | 1534 | 1731 | 1523 | 1389 | 1203    | Sic27a3  |         |
| Sic27a4  | 3099  | 3972  | 4004  | 4273  | 4289  | 3954  | 3452  | 3313  | 3861 | 4093 | 3723 | 3738 | 3825 | 3398 | 3343  | 3727  | 4159  | 4160  | 4523  | 3548  | 4047  | 4553 | 3809 | 4015 | 4078 | 3418 | 3519 | 3438    | Sic27a4  |         |
| Sic27a5  | 20    | 17    | 18    | 39    | 49    | 53    | 32    | 26    | 35   | 32   | 34   | 22   | 16   | 29   | 24    | 26    | 72    | 48    | 49    | 17    | 32    | 23   | 17   | 37   | 23   | 39   | 17   | 14      | Sic27a5  |         |
| Sic27a6  | 247   | 199   | 264   | 139   | 99    | 155   | 60    | 175   | 255  | 260  | 330  | 197  | 274  | 206  | 204   | 301   | 153   | 142   | 81    | 76    | 63    | 192  | 278  | 202  | 233  | 260  | 187  | 215     | Sic27a6  |         |
| Sic28a1  | 1     | 5     | 0     | 10    | 2     | 4     | 6     | 0     | 1    | 2    | 5    | 0    | 12   | 2    | 1     | 9     | 6     | 6     | 5     | 2     | 7     | 0    | 13   | 1    | 9    | 0    | 1    | 12      | Sic28a1  |         |
| Sic28a2  | 7     | 4     | 4     | 0     | 1     | 5     | 1     | 4     | 5    | 2    | 49   | 0    | 10   | 1    | 3     | 2     | 1     | 1     | 5     | 1     | 4     | 0    | 21   | 7    | 3    | 6    | 8    | 2       | Sic28a2  |         |
| Sic28a2b | 0     | 0     | 0     | 0     | 0     | 0     | 0     | 0     | 0    | 0    | 1    | 0    | 0    | 0    | 0     | 0     | 0     | 1     | 0     | 1     | 1     | 0    | 0    | 0    | 0    | 0    | 0    | 0       | Sic28a2b |         |
| Sic28a3  | 22    | 10    | 3     | 5     | 11    | 9     | 3     | 15    | 16   | 14   | 16   | 0    | 5    | 5    | 12    | 13    | 10    | 4     | 2     | 6     | 2     | 7    | 17   | 15   | 1    | 4    | 1    | 1       | Sic28a3  |         |
| Sic29a1  | 3002  | 3338  | 3233  | 2667  | 2554  | 2700  | 2626  | 1243  | 1714 | 1422 | 1750 | 1560 | 1471 | 1428 | 2661  | 3271  | 2986  | 2886  | 2870  | 2837  | 2522  | 1333 | 1779 | 1679 | 1471 | 1855 | 1618 | 1671    | Sic29a1  |         |
| Sic29a2  | 518   | 694   | 552   | 512   | 718   | 580   | 580   | 673   | 752  | 711  | 700  | 752  | 676  | 696  | 508   | 638   | 672   | 536   | 663   | 611   | 562   | 755  | 662  | 728  | 833  | 742  | 758  | 685     | Sic29a2  |         |
| Sic29a3  | 1434  | 1570  | 1459  | 1289  | 1603  | 1511  | 1569  | 1796  | 2217 | 1968 | 2025 | 2153 | 2046 | 1957 | 1618  | 1413  | 1574  | 1400  | 1570  | 1302  | 1487  | 2094 | 2016 | 1785 | 1862 | 1826 | 2087 | 2077    | Sic29a3  |         |
| Sic29a4  | 3069  | 4266  | 3972  | 5056  | 5471  | 4619  | 4235  | 2419  | 2880 | 3320 | 2651 | 3184 | 2625 | 2681 | 3252  | 3407  | 4789  | 5160  | 5911  | 3984  | 4830  | 3711 | 2483 | 3076 | 3564 | 2660 | 2463 | 2421    | Sic29a4  |         |
| Sic2a1   | 6373  | 7979  | 7936  | 6561  | 5763  | 6176  | 5463  | 5356  | 6517 | 7072 | 5976 | 7335 | 7185 | 6818 | 6091  | 6926  | 6839  | 6440  | 6544  | 5832  | 5883  | 5180 | 6543 | 7409 | 6259 | 7780 | 7160 | 7524    | Sic2a1   |         |
| Sic2a10  | 309   | 282   | 291   | 225   | 194   | 280   | 178   | 502   | 557  | 430  | 528  | 431  | 474  | 420  | 315   | 315   | 272   | 323   | 185   | 170   | 147   | 500  | 530  | 493  | 365  | 520  | 401  | 389     | Sic2a10  |         |
| Sic2a12  | 379   | 363   | 303   | 277   | 340   | 329   | 189   | 482   | 553  | 447  | 453  | 556  | 586  | 352  | 367   | 461   | 234   | 285   | 300   | 313   | 280   | 471  | 794  | 395  | 383  | 350  | 439  | 394     | Sic2a12  |         |
| Sic2a13  | 2074  | 1793  | 1388  | 2020  | 2287  | 2168  | 2331  | 1323  | 1402 | 1275 | 1394 | 1020 | 1145 | 1031 | 2234  | 2069  | 1570  | 2334  | 1988  | 2358  | 2260  | 1479 | 1500 | 979  | 1220 | 772  | 1015 | 960     | Sic2a13  |         |
| Sic2a2   | 21    | 16    | 10    | 19    | 29    | 49    | 38    | 5     | 2    | 2    | 6    | 1    | 2    | 1    | 13    | 13    | 15    | 40    | 21    | 25    | 55    | 7    | 8    | 0    | 1    | 8    | 2    | 0       | Sic2a2   |         |
| Sic2a3   | 8889  | 9566  | 9784  | 7238  | 6973  | 8296  | 6569  | 3326  | 4247 | 2798 | 3198 | 3292 | 4024 | 3124 | 8890  | 8517  | 7130  | 7933  | 6566  | 7590  | 6371  | 2075 | 4448 | 3134 | 2221 | 1987 | 3339 | 3682    | Sic2a3   |         |
| Sic2a4   | 1637  | 1790  | 1614  | 1526  | 1168  | 1458  | 1543  | 630   | 902  | 727  | 709  | 840  | 819  | 826  | 1416  | 1600  | 1545  | 1467  | 1340  | 1380  | 1341  | 498  | 731  | 736  | 576  | 1179 | 811  | 846     | Sic2a4   |         |
| Sic2a5   | 138   | 233   | 187   | 132   | 187   | 131   | 163   | 138   | 124  | 109  | 156  | 106  | 162  | 123  | 164   | 210   | 260   | 191   | 227   | 154   | 211   | 164  | 146  | 119  | 101  | 215  | 159  | 176     | Sic2a5   |         |
| Sic2a6   | 235   | 351   | 246   | 230   | 345   | 270   | 277   | 95    | 164  | 146  | 123  | 105  | 144  | 114  | 294   | 346   | 273   | 265   | 243   | 316   | 293   | 179  | 137  | 115  | 127  | 106  | 129  | 108     | Sic2a6   |         |
| Sic2a7   | 0     | 0     | 1     | 0     | 0     | 3     | 0     | 0     | 0    | 0    | 0    | 0    | 0    | 0    | 0     | 5     | 3     | 3     | 0     | 0     | 0     | 0    | 1    | 0    | 0    | 0    | 0    | 0       | 0        | Sic2a7  |
| Sic2a8   | 1553  | 2046  | 1769  | 1991  | 1735  | 1795  | 1605  | 597   | 764  | 776  | 720  | 762  | 739  | 577  | 1381  | 1881  | 1856  | 2107  | 1732  | 1556  | 1579  | 652  | 734  | 690  | 687  | 757  | 767  | 627     | Sic2a8   |         |
| Sic2a9   | 53    | 51    | 40    | 29    | 42    | 39    | 39    | 57    | 98   | 43   | 93   | 74   | 76   | 40   | 57    | 61    | 38    | 31    | 49    | 40    | 37    | 47   | 79   | 50   | 59   | 86   | 53   | 53      | Sic2a9   |         |
| Sic30a1  | 77    | 34    | 48    | 72    | 71    | 62    | 70    | 72    | 51   | 46   | 43   | 53   | 60   | 36   | 76    | 64    | 74    | 70    | 64    | 79    | 50    | 52   | 65   | 61   | 54   | 57   | 40   | 50      | Sic30a1  |         |
| Sic30a10 | 918   | 739   | 820   | 1463  | 2736  | 2490  | 3242  | 2142  | 2588 | 2953 | 2171 | 2326 | 1828 | 2397 | 920   | 780   | 969   | 1750  | 2734  | 2386  | 3125  | 1743 | 2214 | 2917 | 3589 | 1730 | 1558 | 2013    | Sic30a10 |         |
| Sic30a2  | 17    | 16    | 13    | 12    | 11    | 4     | 7     | 1     | 4    | 1    | 6    | 1    | 2    | 17   | 14    | 6     | 12    | 3     | 6     | 9     | 5     | 14   | 2    | 0    | 7    | 2    | 6    | 6       | Sic30a2  |         |
| Sic30a3  | 346   | 695   | 686   | 705   | 862   | 752   | 432   | 557   | 469  | 791  | 541  | 569  | 950  | 392  | 525   | 536   | 765   | 691   | 786   | 605   | 510   | 847  | 373  | 365  | 523  | 131  | 602  | 471     | Sic30a3  |         |
| Sic30a5  | 6719  | 5951  | 5801  | 5784  | 4940  | 5723  | 5760  | 4419  | 4186 | 3749 | 4201 | 4135 | 3828 | 3972 | 6794  | 6284  | 5373  | 5869  | 5035  | 5628  | 5399  | 4096 | 4159 | 4236 | 4053 | 474  | 3883 | 4306    | Sic30a5  |         |
| Sic30a6  | 1136  | 958   | 1066  | 1013  | 896   | 959   | 927   | 1160  | 1196 | 1085 | 1098 | 1137 | 1232 | 1230 | 1039  | 994   | 997   | 957   | 921   | 1010  | 1023  | 1093 | 1267 | 1173 | 1117 | 1340 | 1141 | 1132    | Sic30a6  |         |
| Sic30a7  | 6345  | 5974  | 4059  | 5029  | 4970  | 5442  | 5547  | 4686  | 4331 | 3921 | 4199 | 3876 | 3997 | 3965 | 6257  | 6212  | 4392  | 5620  | 4615  | 5564  | 5669  | 3967 | 4438 | 3367 | 3878 | 3088 | 4085 | 3900    | Sic30a7  |         |
| Sic30a8  | 6     | 3     | 8     | 0     | 5     | 1     | 8     | 2     | 1    | 6    | 2    | 0    | 2    | 0    | 1     | 3     | 0     | 7     | 5     | 3     | 2     | 12   | 1    | 3    | 2    | 0    | 2    | 0       | 1        | Sic30a8 |
| Sic30a9  | 12854 | 12156 | 11353 | 12354 | 11737 | 11942 | 13009 | 10014 | 8540 | 8688 | 8054 | 8788 | 8197 | 8685 | 13829 | 12206 | 12290 | 12532 | 11628 | 12820 | 12366 | 9580 | 8442 | 8237 | 9090 | 7900 | 8686 | 8529    | Sic30a9  |         |
| Sic31a1  | 11477 | 10595 | 9615  | 9253  | 8494  | 8995  | 10013 | 5961  | 5217 | 4865 | 4987 | 5428 | 5384 | 5354 | 11814 | 10668 | 9396  | 9480  | 8611  | 9946  | 9355  | 4988 | 5825 | 4872 | 4866 | 5697 | 5527 | 5880    | Sic31a1  |         |
| Sic31a2  | 976   | 1050  | 1092  | 1040  | 1166  | 1142  | 954   | 564   | 597  | 584  | 766  | 518  | 668  | 549  | 936   | 1116  | 1065  | 1165  | 1089  | 1055  | 991   | 764  | 603  | 607  | 575  | 557  | 508  | Sic31a2 |          |         |
| Sic32a1  | 514   | 685   | 649   | 1451  | 1926  | 1382  | 1396  | 1310  | 1439 | 2118 | 1637 | 1749 | 1349 | 1792 | 508   | 352   | 1433  | 1524  | 1908  | 1069  | 1749  | 2197 | 1111 | 2024 | 2229 | 1591 | 1416 | 1498    | Sic32a1  |         |
| Sic33a1  | 3295  | 2811  | 2607  | 2869  | 2615  | 2430  | 2928  | 2014  | 1808 | 1734 | 1789 | 1632 | 1690 | 1666 | 3345  | 3018  | 2605  | 2969  | 2681  | 2867  | 2649  | 1988 | 1923 | 1798 | 1889 | 1783 | 1683 | 1688    | Sic33a1  |         |
| Sic34a1  | 0     | 3     | 0     | 0     | 3     | 0     | 0     | 1     | 2    | 0    | 1    | 0    | 7    | 1    | 4     | 0     | 1     | 1     | 2     | 1     | 3     | 0    | 1    | 0    | 0    | 1    | 1    | 1       | Sic34a1  |         |
| Sic34a2  | 1     | 0     | 0     | 0     | 0     | 0     | 0     | 7     | 13   | 8    | 3    | 0    | 3    | 0    | 1     | 1     | 2     | 0     | 2     | 1     | 1     | 0    | 8    | 3    | 0    | 2    | 0    | 0       | Sic34a2  |         |
| Sic34a3  | 1     | 1     | 0     | 0     | 0     | 3     | 0     | 0     | 0    | 0    | 0    | 0    | 0    | 0    | 0     | 0     | 0     | 0     | 0     | 0     | 0     | 0    | 0    | 0    | 0    | 0    | 1    | 0       | Sic34a3  |         |
| Sic35a1  | 1413  | 1234  | 1766  | 1332  | 1585  | 1656  | 1592  | 2864  | 2429 | 2649 | 2607 | 3098 | 3005 | 3047 | 1598  | 1457  | 1654  | 1360  | 1697  | 1571  | 1576  | 2887 | 2590 | 2812 | 2571 | 3023 | 3060 | 3021    | Sic35a1  |         |
| Sic35a2  | 2170  | 2553  | 2318  | 2405  | 2015  | 1856  | 1980  | 1304  | 1495 | 1544 | 1765 | 1642 | 1556 | 1442 | 1921  | 2231  | 2431  | 2308  | 2067  | 1990  | 1948  | 1634 | 1539 | 1640 | 1622 | 1616 | 1539 | 1556    | Sic35a2  |         |
| Sic35a3  | 2189  | 1482  | 2028  | 1872  | 1932  | 1749  | 1884  | 2076  | 1892 | 1663 | 2079 | 1807 | 2165 | 2023 | 2217  | 2091  | 1895  | 1716  | 1739  | 1806  | 1747  | 1880 | 1985 | 1789 | 1671 | 1813 | 1843 | 1982    | Sic35a3  |         |
| Sic35a4  | 4083  | 4323  | 4192  | 3387  | 3071  | 3234  | 3099  | 4136  | 4944 | 4480 | 4784 | 5210 | 5328 | 4847 | 3579  | 4056  | 3633  | 3327  | 3358  | 3181  | 2979  | 4044 | 4603 | 4569 | 4603 | 6032 | 5189 | 5352    | Sic35a4  |         |
| Sic35a5  | 1884  | 1534  | 1665  | 1655  | 2076  | 2054  | 2168  | 3021  | 2438 | 2166 | 2210 | 2083 | 2167 | 2198 | 2126  | 1583  | 1698  | 1709  | 2090  | 2408  | 2071  | 2717 | 2396 | 2107 | 2424 | 1778 | 2073 | 2105    | Sic35a5  |         |
| Sic35b1  | 4347  | 4369  | 4039  | 3587  | 3449  | 3478  | 4034  | 4991  | 4302 | 3890 | 4100 | 4243 | 4072 | 4426 | 4404  | 3793  | 3892  | 3524  | 3907  | 4172  | 3908  | 4380 | 4422 | 4265 | 4414 | 4518 | 4398 | 4711    | Sic35b1  |         |
| Sic35b2  | 3930  | 4736  | 4134  | 4335  | 3515  | 4196  | 3552  | 3154  | 3441 | 3082 | 3068 | 3344 | 3539 | 3042 | 3957  | 4205  | 4073  | 4059  | 4060  | 4097  | 3604  | 2583 | 3601 | 3171 | 3170 | 3723 | 3737 | 3205    | Sic35b2  |         |
| Sic35b3  | 2081  | 1602  | 1522  | 1704  | 1716  | 1817  | 1840  | 1779  | 1734 | 1700 | 1691 | 1781 | 1669 | 1687 | 2070  | 1833  | 1649  | 1650  | 1608  | 1795  | 1633  | 1825 | 1743 | 1604 | 1573 | 1625 | 1643 | 1565    | Sic35b3  |         |
| Sic35b4  | 4684  | 4531  | 3939  | 3843  | 3810  | 3918  | 3956  | 4042  | 4102 | 3866 | 4049 | 4107 | 3799 | 3716 | 4272  | 4498  | 3876  | 4292  | 3359  | 3886  | 3959  | 4390 | 3960 | 3833 | 3771 | 3630 | 4095 | 4095    | Sic35b4  |         |
| Sic35c1  | 1059  | 1468  | 1447  | 1386  | 1172  | 1236  | 1163  | 581   | 723  | 77   |      |      |      |      |       |       |       |       |       |       |       |      |      |      |      |      |      |         |          |         |



|          |       |       |       |       |       |       |       |       |       |       |       |       |       |       |       |       |       |       |       |       |       |       |       |       |       |       |       |         |          |
|----------|-------|-------|-------|-------|-------|-------|-------|-------|-------|-------|-------|-------|-------|-------|-------|-------|-------|-------|-------|-------|-------|-------|-------|-------|-------|-------|-------|---------|----------|
| Slc38a3  | 1772  | 2363  | 2357  | 2160  | 2488  | 2096  | 2010  | 1259  | 1554  | 1672  | 1458  | 1438  | 1555  | 1343  | 1843  | 2176  | 2216  | 2590  | 2299  | 2333  | 2275  | 1711  | 1814  | 1571  | 1731  | 1242  | 1327  | 1197    | Slc38a3  |
| Slc38a4  | 4750  | 3195  | 3529  | 1633  | 996   | 1804  | 771   | 1844  | 2547  | 1904  | 3818  | 1486  | 2783  | 1517  | 4200  | 5108  | 2005  | 2037  | 923   | 1172  | 788   | 1866  | 3787  | 1789  | 1341  | 1891  | 1941  | 1851    | Slc38a4  |
| Slc38a5  | 113   | 209   | 133   | 269   | 533   | 477   | 475   | 455   | 452   | 497   | 450   | 355   | 289   | 296   | 170   | 131   | 163   | 329   | 468   | 437   | 502   | 592   | 469   | 431   | 574   | 203   | 242   | 301     | Slc38a5  |
| Slc38a6  | 1754  | 1508  | 1626  | 1656  | 1393  | 1631  | 1275  | 1606  | 1600  | 1891  | 2328  | 1534  | 1774  | 1663  | 1513  | 2042  | 1586  | 1563  | 1122  | 1245  | 1259  | 1865  | 1779  | 1557  | 1664  | 1455  | 1682  | 1413    | Slc38a6  |
| Slc38a7  | 2568  | 3325  | 2947  | 3453  | 2806  | 2786  | 3142  | 1773  | 2109  | 2306  | 1924  | 2068  | 2038  | 1928  | 2403  | 2919  | 3160  | 3593  | 3412  | 3120  | 3258  | 2366  | 2021  | 2062  | 2464  | 2176  | 2192  | 2182    | Slc38a7  |
| Slc38a8  | 13    | 8     | 3     | 3     | 4     | 5     | 0     | 5     | 7     | 2     | 13    | 39    | 2     | 10    | 4     | 2     | 6     | 3     | 11    | 6     | 5     | 15    | 8     | 2     | 4     | 7     | 7     | 7       | Slc38a8  |
| Slc38a9  | 5037  | 4849  | 4226  | 5263  | 5021  | 5341  | 5330  | 3163  | 2789  | 2825  | 2759  | 2925  | 2931  | 3047  | 5083  | 4818  | 4847  | 5304  | 4821  | 5184  | 5570  | 2944  | 2717  | 2750  | 3037  | 2201  | 3067  | 2991    | Slc38a9  |
| Slc39a1  | 5191  | 5286  | 5081  | 4529  | 3741  | 4009  | 4140  | 4096  | 4128  | 3711  | 4092  | 3930  | 4500  | 4173  | 4750  | 4986  | 4475  | 4092  | 4090  | 4012  | 4034  | 3725  | 4442  | 3970  | 3756  | 4909  | 4541  | 4867    | Slc39a1  |
| Slc39a10 | 9748  | 8299  | 8010  | 7524  | 8818  | 8596  | 9180  | 16153 | 13509 | 11986 | 11307 | 12898 | 13051 | 12902 | 10158 | 8568  | 7935  | 7814  | 8827  | 10588 | 8873  | 13485 | 14012 | 11946 | 12512 | 11474 | 13763 | 13377   | Slc39a10 |
| Slc39a11 | 1100  | 1274  | 979   | 1224  | 1275  | 1431  | 1225  | 1249  | 1301  | 1359  | 1238  | 1228  | 1328  | 1226  | 1205  | 1166  | 1210  | 1420  | 1330  | 1225  | 1242  | 1228  | 1381  | 1338  | 1386  | 1287  | 1141  | 1262    | Slc39a11 |
| Slc39a12 | 47    | 67    | 58    | 29    | 102   | 65    | 42    | 165   | 150   | 146   | 88    | 125   | 186   | 118   | 88    | 65    | 66    | 51    | 51    | 77    | 65    | 165   | 219   | 84    | 104   | 76    | 144   | 132     | Slc39a12 |
| Slc39a13 | 1421  | 1744  | 1643  | 1503  | 1528  | 1506  | 1255  | 1280  | 1649  | 1570  | 1906  | 1397  | 1498  | 1278  | 1407  | 1643  | 1705  | 1595  | 1481  | 1393  | 1269  | 1537  | 1744  | 1487  | 1500  | 1317  | 1384  | 1240    | Slc39a13 |
| Slc39a14 | 3095  | 2845  | 2671  | 2836  | 2608  | 2818  | 2773  | 1668  | 2155  | 2063  | 2377  | 1856  | 2194  | 1855  | 2469  | 3071  | 2892  | 2726  | 2614  | 2639  | 2783  | 1960  | 1901  | 1849  | 2085  | 1557  | 1866  | 1860    | Slc39a14 |
| Slc39a2  | 727   | 962   | 801   | 1363  | 1330  | 1173  | 1293  | 691   | 692   | 768   | 729   | 609   | 551   | 698   | 744   | 738   | 1073  | 1460  | 1305  | 1018  | 1339  | 889   | 621   | 854   | 837   | 535   | 562   | 657     | Slc39a2  |
| Slc39a3  | 1343  | 1887  | 1702  | 2294  | 2648  | 2145  | 2091  | 2717  | 3213  | 3743  | 3148  | 3085  | 2948  | 2962  | 1476  | 1488  | 2104  | 2395  | 2708  | 2064  | 2233  | 3626  | 2959  | 3639  | 3823  | 3417  | 3221  | 2885    | Slc39a3  |
| Slc39a4  | 12    | 17    | 4     | 22    | 13    | 12    | 16    | 13    | 21    | 21    | 17    | 5     | 19    | 11    | 16    | 29    | 5     | 17    | 13    | 18    | 17    | 23    | 18    | 7     | 22    | 9     | 12    | 0       | Slc39a4  |
| Slc39a5  | 10    | 18    | 14    | 5     | 16    | 10    | 10    | 5     | 8     | 7     | 9     | 3     | 7     | 1     | 16    | 10    | 8     | 21    | 5     | 2     | 4     | 5     | 8     | 0     | 4     | 5     | 2     | 5       | Slc39a5  |
| Slc39a6  | 10864 | 10023 | 10321 | 11923 | 13863 | 13007 | 12952 | 11223 | 10590 | 11423 | 11353 | 11317 | 10713 | 11034 | 11381 | 9668  | 11780 | 12378 | 13054 | 13317 | 13297 | 12074 | 10333 | 10939 | 11785 | 11591 | 10689 | 10872   | Slc39a6  |
| Slc39a7  | 120   | 168   | 127   | 162   | 106   | 56    | 141   | 73    | 78    | 131   | 113   | 108   | 76    | 188   | 94    | 50    | 188   | 92    | 66    | 76    | 189   | 65    | 81    | 200   | 104   | 113   | 95    | 169     | Slc39a7  |
| Slc39a8  | 1225  | 1134  | 1480  | 988   | 1022  | 996   | 1040  | 1351  | 1161  | 1203  | 1128  | 1513  | 1799  | 1658  | 1374  | 1320  | 1052  | 966   | 999   | 1085  | 1037  | 1196  | 1278  | 1304  | 1187  | 1503  | 1655  | 2039    | Slc39a8  |
| Slc39a9  | 6993  | 6791  | 5456  | 5783  | 5361  | 5797  | 5910  | 5417  | 5018  | 4612  | 4746  | 5097  | 5029  | 4966  | 6637  | 6138  | 5266  | 5773  | 5471  | 5963  | 6266  | 5036  | 5136  | 4619  | 4844  | 4170  | 5106  | 5277    | Slc39a9  |
| Slc3a1   | 554   | 640   | 549   | 1089  | 779   | 721   | 982   | 142   | 119   | 154   | 102   | 166   | 230   | 166   | 505   | 648   | 744   | 1039  | 893   | 557   | 950   | 192   | 115   | 144   | 183   | 122   | 192   | 189     | Slc3a1   |
| Slc3a2   | 3986  | 4426  | 4617  | 4511  | 4602  | 4326  | 4183  | 4090  | 4376  | 4838  | 4407  | 5095  | 4750  | 5447  | 3935  | 3953  | 4263  | 4582  | 4744  | 3949  | 4626  | 4585  | 4585  | 5090  | 4723  | 5578  | 4967  | 5394    | Slc3a2   |
| Slc40a1  | 1807  | 1635  | 1832  | 1476  | 1321  | 1511  | 1358  | 1607  | 1596  | 1329  | 1725  | 1599  | 1746  | 1718  | 1847  | 2108  | 1341  | 1732  | 1015  | 1415  | 1503  | 1858  | 2148  | 1470  | 1676  | 1612  | 1547  | 1564    | Slc40a1  |
| Slc41a1  | 2633  | 3295  | 3400  | 3295  | 3199  | 2960  | 3076  | 2242  | 2758  | 2472  | 2866  | 2580  | 2548  | 2516  | 2604  | 2991  | 3204  | 3318  | 3435  | 2948  | 3182  | 2697  | 3141  | 2880  | 2775  | 2601  | 2600  | 2467    | Slc41a1  |
| Slc41a2  | 114   | 79    | 82    | 108   | 237   | 154   | 168   | 326   | 391   | 434   | 471   | 227   | 271   | 248   | 131   | 108   | 110   | 167   | 131   | 131   | 146   | 456   | 379   | 324   | 392   | 163   | 231   | 210     | Slc41a2  |
| Slc41a3  | 280   | 324   | 269   | 286   | 271   | 277   | 193   | 115   | 174   | 177   | 188   | 184   | 237   | 158   | 290   | 341   | 315   | 250   | 262   | 219   | 218   | 172   | 212   | 154   | 117   | 155   | 202   | 183     | Slc41a3  |
| Slc43a1  | 991   | 790   | 934   | 592   | 545   | 644   | 572   | 697   | 791   | 796   | 872   | 966   | 976   | 954   | 825   | 900   | 801   | 560   | 627   | 582   | 521   | 503   | 750   | 917   | 628   | 1317  | 1022  | 1042    | Slc43a1  |
| Slc43a2  | 1036  | 1188  | 1411  | 1675  | 2695  | 1955  | 1804  | 2558  | 2806  | 3740  | 3465  | 3108  | 3255  | 2880  | 1229  | 1195  | 1708  | 1991  | 2268  | 1709  | 2022  | 4204  | 2597  | 3399  | 3993  | 2114  | 2804  | 2625    | Slc43a2  |
| Slc43a3  | 1618  | 1252  | 1196  | 742   | 713   | 773   | 574   | 1049  | 1174  | 1053  | 1420  | 1103  | 1422  | 941   | 1358  | 1763  | 866   | 913   | 572   | 611   | 506   | 996   | 1367  | 1058  | 722   | 1343  | 1080  | 1140    | Slc43a3  |
| Slc44a1  | 5233  | 3591  | 4076  | 3760  | 3386  | 3976  | 3676  | 3820  | 3903  | 3444  | 4101  | 2746  | 3109  | 2922  | 4742  | 4836  | 3526  | 4039  | 3398  | 3467  | 3564  | 3389  | 4419  | 3277  | 3022  | 3391  | 2836  | 2922    | Slc44a1  |
| Slc44a2  | 11147 | 11083 | 9775  | 10599 | 9456  | 9898  | 9354  | 5213  | 6160  | 6090  | 6571  | 5332  | 5761  | 5266  | 10052 | 10856 | 10182 | 10513 | 9690  | 8707  | 9285  | 5681  | 6088  | 5828  | 5210  | 5793  | 5165  | 5142    | Slc44a2  |
| Slc44a3  | 75    | 31    | 18    | 15    | 12    | 21    | 10    | 57    | 55    | 52    | 64    | 26    | 20    | 11    | 36    | 40    | 15    | 13    | 28    | 22    | 24    | 32    | 71    | 48    | 9     | 48    | 14    | 8       | Slc44a3  |
| Slc44a4  | 8     | 9     | 6     | 11    | 3     | 3     | 2     | 4     | 7     | 9     | 11    | 5     | 7     | 4     | 11    | 10    | 6     | 4     | 2     | 1     | 2     | 8     | 11    | 10    | 7     | 7     | 0     | 1       | Slc44a4  |
| Slc44a5  | 857   | 942   | 567   | 1100  | 1559  | 1485  | 1385  | 2209  | 1898  | 1654  | 1498  | 1488  | 1698  | 1478  | 1083  | 1231  | 934   | 1147  | 1338  | 1894  | 1632  | 1978  | 1885  | 1427  | 2232  | 765   | 1425  | 1260    | Slc44a5  |
| Slc45a1  | 442   | 678   | 628   | 957   | 1314  | 1029  | 914   | 784   | 906   | 1061  | 880   | 857   | 831   | 793   | 618   | 575   | 899   | 990   | 1146  | 932   | 975   | 1186  | 789   | 939   | 1180  | 723   | 685   | 656     | Slc45a1  |
| Slc45a2  | 17    | 15    | 13    | 2     | 2     | 13    | 1     | 13    | 40    | 21    | 21    | 18    | 20    | 10    | 9     | 8     | 6     | 4     | 2     | 1     | 1     | 5     | 34    | 15    | 5     | 5     | 8     | 6       | Slc45a2  |
| Slc45a3  | 919   | 1271  | 1438  | 1004  | 742   | 772   | 725   | 423   | 326   | 416   | 371   | 631   | 667   | 653   | 913   | 945   | 1160  | 861   | 891   | 808   | 871   | 490   | 456   | 445   | 458   | 378   | 872   | 917     | Slc45a3  |
| Slc45a4  | 3698  | 4285  | 3875  | 4822  | 4502  | 4264  | 4155  | 1713  | 2085  | 2228  | 2299  | 2342  | 2223  | 2238  | 3562  | 4189  | 4428  | 4791  | 4361  | 3388  | 4253  | 2374  | 2038  | 2300  | 2165  | 2077  | 2268  | Slc45a4 |          |
| Slc46a1  | 299   | 342   | 313   | 296   | 335   | 270   | 256   | 396   | 431   | 357   | 398   | 384   | 483   | 403   | 261   | 252   | 360   | 278   | 346   | 342   | 302   | 431   | 452   | 421   | 405   | 499   | 463   | 476     | Slc46a1  |
| Slc46a2  | 0     | 2     | 0     | 0     | 0     | 7     | 0     | 1     | 2     | 3     | 0     | 0     | 0     | 0     | 0     | 0     | 0     | 1     | 2     | 1     | 0     | 3     | 1     | 1     | 1     | 0     | 0     | 0       | Slc46a2  |
| Slc46a3  | 675   | 645   | 668   | 551   | 596   | 556   | 568   | 171   | 152   | 178   | 152   | 129   | 195   | 180   | 638   | 646   | 688   | 518   | 541   | 567   | 516   | 169   | 233   | 184   | 130   | 152   | 171   | 191     | Slc46a3  |
| Slc47a1  | 8     | 10    | 0     | 1     | 6     | 5     | 1     | 10    | 19    | 29    | 14    | 1     | 8     | 14    | 8     | 9     | 1     | 4     | 1     | 5     | 8     | 5     | 9     | 11    | 6     | 0     | 0     | 7       | Slc47a1  |
| Slc47a2  | 5     | 3     | 4     | 0     | 6     | 1     | 0     | 1     | 6     | 3     | 4     | 0     | 0     | 1     | 3     | 6     | 5     | 0     | 1     | 2     | 4     | 3     | 3     | 0     | 0     | 1     | 6     | 0       | Slc47a2  |
| Slc48a1  | 2098  | 2472  | 2247  | 2065  | 2169  | 2211  | 2220  | 1903  | 2208  | 1871  | 1926  | 1988  | 2004  | 1932  | 2127  | 2291  | 2220  | 2222  | 2268  | 2419  | 2079  | 2000  | 2250  | 1941  | 2087  | 2024  | 2049  | 2028    | Slc48a1  |
| Slc49a1  | 2390  | 2505  | 2231  | 2663  | 3547  | 3408  | 3074  | 3425  | 3200  | 3309  | 3061  | 2276  | 2725  | 2544  | 2868  | 2311  | 2519  | 2902  | 3293  | 3232  | 3379  | 3471  | 3087  | 2928  | 3508  | 2590  | 2410  | 2470    | Slc49a1  |
| Slc4a1   | 2245  | 3981  | 3623  | 1282  | 451   | 1022  | 933   | 1231  | 2048  | 1404  | 1083  | 2628  | 8894  | 4415  | 2487  | 3340  | 2017  | 876   | 908   | 1480  | 661   | 1888  | 1935  | 1151  | 1031  | 3223  | 4212  | 9863    | Slc4a1   |
| Slc4a10  | 580   | 640   | 323   | 747   | 1618  | 1392  | 1187  | 1542  | 1619  | 1430  | 1215  | 903   | 1110  | 610   | 707   | 792   | 501   | 961   | 1069  | 1227  | 1327  | 1192  | 2040  | 820   | 1326  |       |       |         |          |



|          |       |       |       |       |       |       |       |       |       |       |       |       |       |       |       |       |       |       |       |       |       |       |       |       |       |       |          |         |          |        |
|----------|-------|-------|-------|-------|-------|-------|-------|-------|-------|-------|-------|-------|-------|-------|-------|-------|-------|-------|-------|-------|-------|-------|-------|-------|-------|-------|----------|---------|----------|--------|
| Slitrk3  | 787   | 953   | 859   | 1242  | 2082  | 1658  | 1675  | 1722  | 1567  | 1814  | 1670  | 1071  | 1102  | 1074  | 1014  | 785   | 1355  | 1347  | 1820  | 1567  | 1814  | 2411  | 1423  | 1248  | 1747  | 717   | 903      | 952     | Slitrk3  |        |
| Slitrk4  | 1453  | 1018  | 883   | 1336  | 1656  | 1688  | 1753  | 1122  | 1009  | 835   | 820   | 770   | 695   | 794   | 1457  | 1228  | 1114  | 1250  | 1487  | 1716  | 1755  | 1123  | 887   | 732   | 933   | 587   | 769      | 801     | Slitrk4  |        |
| Slitrk5  | 1431  | 1435  | 1564  | 1456  | 2087  | 1839  | 1966  | 2832  | 2482  | 2858  | 2368  | 2523  | 2531  | 2803  | 1569  | 1319  | 1854  | 1587  | 1948  | 1800  | 1866  | 3298  | 2233  | 2549  | 3074  | 2295  | 2786     | 2776    | Slitrk5  |        |
| Slitrk6  | 760   | 352   | 216   | 256   | 367   | 311   | 185   | 1677  | 1456  | 894   | 945   | 419   | 803   | 247   | 475   | 668   | 272   | 296   | 256   | 400   | 196   | 740   | 1437  | 588   | 372   | 576   | 296      | 298     | Slitrk6  |        |
| Slk      | 14798 | 12024 | 10694 | 11914 | 11475 | 12409 | 11996 | 8934  | 8485  | 7348  | 8382  | 8228  | 8028  | 8413  | 13111 | 13395 | 10790 | 11813 | 10880 | 12861 | 11851 | 7082  | 8413  | 7570  | 7824  | 6478  | 8176     | 7889    | Slk      |        |
| Slmap    | 9135  | 6942  | 7920  | 8007  | 8106  | 8511  | 8634  | 6000  | 5537  | 5725  | 5915  | 5965  | 5987  | 6123  | 8375  | 8060  | 7995  | 8010  | 7443  | 7772  | 8147  | 5919  | 5678  | 5632  | 5939  | 5581  | 6211     | 5916    | Slmap    |        |
| Slh      | 18    | 1     | 0     | 7     | 1     | 5     | 4     | 31    | 82    | 11    | 454   | 1     | 16    | 2     | 4     | 13    | 0     | 10    | 12    | 5     | 9     | 48    | 345   | 12    | 18    | 13    | 0        | 2       | Slh      |        |
| Slpi     | 8     | 10    | 6     | 24    | 15    | 44    | 1     | 26    | 89    | 139   | 225   | 31    | 39    | 17    | 13    | 16    | 3     | 55    | 12    | 0     | 0     | 202   | 62    | 76    | 117   | 24    | 22       | 24      | Slpi     |        |
| Sltm     | 8002  | 6928  | 8977  | 8449  | 8991  | 8536  | 9295  | 13015 | 10706 | 12158 | 11354 | 12965 | 12247 | 13773 | 8310  | 7303  | 8712  | 7985  | 8893  | 9024  | 8821  | 12524 | 10403 | 12357 | 13006 | 12352 | 12925    | 13556   | Sltm     |        |
| Slu7     | 5457  | 5702  | 5359  | 5118  | 4671  | 4596  | 5039  | 5768  | 5037  | 5030  | 4672  | 5154  | 4712  | 5563  | 5803  | 5501  | 5215  | 4905  | 4828  | 5311  | 5011  | 5178  | 5009  | 5259  | 5164  | 5214  | 5096     | 5556    | Slu7     |        |
| Slurp1   | 1     | 0     | 0     | 0     | 0     | 0     | 0     | 2     | 2     | 1     | 3     | 0     | 0     | 0     | 0     | 0     | 0     | 0     | 0     | 0     | 0     | 0     | 4     | 1     | 0     | 0     | 0        | 0       | 0        | Slurp1 |
| Slurp2   | 0     | 1     | 0     | 0     | 0     | 0     | 0     | 0     | 0     | 0     | 0     | 0     | 0     | 0     | 0     | 1     | 0     | 0     | 0     | 0     | 2     | 0     | 0     | 0     | 0     | 0     | 0        | 0       | 0        | Slurp2 |
| Slx1b    | 1426  | 1553  | 1761  | 2139  | 2077  | 1924  | 2166  | 1336  | 1293  | 1512  | 1409  | 1565  | 1414  | 1637  | 1573  | 1341  | 2181  | 2010  | 2254  | 2045  | 2194  | 1477  | 1205  | 1622  | 1583  | 1709  | 1587     | 1593    | Slx1b    |        |
| Slx4     | 3400  | 3994  | 3492  | 4388  | 4277  | 4093  | 3761  | 3331  | 3971  | 4144  | 4114  | 4147  | 3992  | 4055  | 3248  | 3894  | 3772  | 4360  | 4020  | 3463  | 3850  | 4124  | 3673  | 3962  | 4283  | 2795  | 3926     | 3711    | Slx4     |        |
| Slx4ip   | 1876  | 1742  | 2019  | 1758  | 2030  | 1753  | 1871  | 3574  | 2955  | 2952  | 2884  | 2804  | 2851  | 3298  | 2032  | 1750  | 1885  | 1586  | 1858  | 1950  | 1874  | 3322  | 2930  | 2897  | 2900  | 2417  | 3140     | 3067    | Slx4ip   |        |
| Smad1    | 2773  | 2541  | 2968  | 3497  | 3809  | 3425  | 3302  | 4267  | 3974  | 4445  | 4331  | 4511  | 4228  | 4313  | 2763  | 2565  | 3312  | 3218  | 3782  | 2903  | 3408  | 4906  | 4060  | 4339  | 4646  | 4491  | 3934     | 4186    | Smad1    |        |
| Smad2    | 8329  | 7463  | 6730  | 7634  | 8629  | 8718  | 8460  | 11323 | 9787  | 8955  | 9006  | 9482  | 9394  | 10033 | 9133  | 7231  | 7258  | 7561  | 8207  | 8884  | 8706  | 10101 | 9227  | 8307  | 10208 | 7825  | 10387    | 9376    | Smad2    |        |
| Smad3    | 4547  | 4201  | 4673  | 3636  | 3827  | 4231  | 2872  | 5796  | 5890  | 5824  | 6558  | 7513  | 7622  | 6640  | 4205  | 4683  | 4155  | 3854  | 3691  | 3193  | 3039  | 5150  | 6242  | 6290  | 5223  | 7920  | 7709     | 7738    | Smad3    |        |
| Smad4    | 8981  | 8013  | 7453  | 8146  | 8579  | 9098  | 8805  | 8764  | 8725  | 8362  | 8313  | 10051 | 9305  | 9326  | 8280  | 7953  | 7787  | 8067  | 9143  | 8216  | 9096  | 7419  | 8598  | 8884  | 9083  | 8120  | 9892     | 9725    | Smad4    |        |
| Smad5    | 14819 | 11849 | 11756 | 12413 | 13358 | 13860 | 13974 | 20316 | 19029 | 17201 | 18276 | 19881 | 19426 | 19055 | 13705 | 12639 | 12169 | 12769 | 13403 | 12750 | 13633 | 18092 | 17301 | 18393 | 19383 | 16808 | 19901    | 19200   | Smad5    |        |
| Smad6    | 657   | 650   | 622   | 531   | 371   | 445   | 270   | 455   | 512   | 423   | 538   | 404   | 519   | 360   | 514   | 650   | 537   | 561   | 345   | 438   | 302   | 356   | 605   | 522   | 332   | 687   | 465      | 446     | Smad6    |        |
| Smad7    | 746   | 684   | 951   | 845   | 757   | 656   | 561   | 852   | 820   | 887   | 857   | 837   | 906   | 765   | 592   | 734   | 847   | 763   | 736   | 561   | 638   | 897   | 935   | 1004  | 758   | 1055  | 683      | 730     | Smad7    |        |
| Smad9    | 499   | 384   | 378   | 344   | 407   | 448   | 296   | 376   | 450   | 405   | 518   | 163   | 293   | 161   | 394   | 526   | 415   | 442   | 362   | 346   | 348   | 376   | 487   | 261   | 284   | 241   | 179      | 170     | Smad9    |        |
| Smapg    | 170   | 186   | 194   | 134   | 133   | 106   | 107   | 93    | 100   | 121   | 122   | 92    | 119   | 78    | 161   | 225   | 143   | 176   | 104   | 115   | 107   | 80    | 161   | 106   | 80    | 100   | 96       | 76      | Smapg    |        |
| Smap1    | 6910  | 6731  | 7918  | 7683  | 7878  | 7513  | 7911  | 6295  | 6309  | 6484  | 6014  | 6480  | 6430  | 6601  | 7346  | 6946  | 7313  | 7990  | 8002  | 6916  | 8034  | 7006  | 6261  | 6457  | 6604  | 6804  | 6111     | 6802    | Smap1    |        |
| Smap2    | 5538  | 5932  | 6161  | 8042  | 8799  | 7747  | 8427  | 4633  | 4884  | 5820  | 4924  | 4820  | 4280  | 4974  | 5968  | 5563  | 7266  | 8335  | 8074  | 6446  | 8685  | 6061  | 4678  | 5506  | 5479  | 4568  | 4166     | 4575    | Smap2    |        |
| Smarca1  | 6034  | 4267  | 4920  | 4425  | 4874  | 5539  | 4967  | 7805  | 7458  | 6026  | 6563  | 6520  | 6293  | 5813  | 6244  | 5667  | 4538  | 4518  | 4701  | 5601  | 4816  | 7386  | 7512  | 5460  | 5904  | 4988  | 5621     | 5543    | Smarca1  |        |
| Smarca2  | 10532 | 9489  | 10925 | 13399 | 13909 | 13135 | 14079 | 9238  | 10995 | 11468 | 12255 | 7926  | 7928  | 8306  | 10320 | 10324 | 11454 | 13937 | 13801 | 11877 | 13874 | 11159 | 11830 | 10891 | 10780 | 8134  | 6962     | 7162    | Smarca2  |        |
| Smarca4  | 16070 | 19606 | 24498 | 25232 | 25939 | 23883 | 22753 | 25753 | 29552 | 39151 | 33474 | 45869 | 36067 | 40399 | 16613 | 17988 | 24662 | 28554 | 18940 | 24895 | 37224 | 27911 | 42331 | 41949 | 41512 | 35404 | 40075    | Smarca4 |          |        |
| Smarca5  | 19750 | 14982 | 20917 | 18120 | 15884 | 17499 | 19501 | 20855 | 15830 | 16915 | 16123 | 22993 | 20729 | 24297 | 19568 | 16733 | 18756 | 16423 | 17259 | 17886 | 18093 | 16967 | 15865 | 19938 | 18329 | 24478 | 23575    | 24696   | Smarca5  |        |
| Smarcad1 | 7344  | 5843  | 7313  | 6817  | 7715  | 7395  | 8356  | 15875 | 12319 | 12046 | 11276 | 15495 | 7705  | 6500  | 7249  | 6376  | 7652  | 8239  | 7700  | 10432 | 12063 | 12841 | 13335 | 13226 | 15077 | 15424 | Smarcad1 |         |          |        |
| Smarcal1 | 2536  | 3136  | 2262  | 2422  | 2647  | 2614  | 2576  | 4190  | 4439  | 3734  | 3874  | 4137  | 3895  | 4178  | 2774  | 2490  | 2371  | 2360  | 2697  | 2916  | 2782  | 3741  | 4198  | 3804  | 3879  | 3914  | 4335     | 4004    | Smarcal1 |        |
| Smarcb1  | 4508  | 4984  | 5972  | 5600  | 5820  | 5413  | 5099  | 7021  | 8251  | 9085  | 8245  | 10110 | 8917  | 9799  | 4538  | 4789  | 6417  | 5547  | 6530  | 4684  | 5440  | 9082  | 7733  | 10014 | 9691  | 11490 | 9002     | 9927    | Smarcb1  |        |
| Smarcc1  | 18919 | 16605 | 20419 | 17617 | 17220 | 17715 | 17820 | 23146 | 26262 | 24524 | 22427 | 29501 | 25952 | 27815 | 17962 | 17485 | 19543 | 17388 | 18453 | 15320 | 17325 | 24249 | 20942 | 26921 | 24462 | 28680 | 26427    | 28603   | Smarcc1  |        |
| Smarcc2  | 17144 | 17877 | 19869 | 22497 | 25825 | 23797 | 22847 | 30003 | 30986 | 37498 | 31425 | 37019 | 30379 | 35573 | 17677 | 16488 | 22059 | 22877 | 26338 | 20973 | 24298 | 38160 | 28508 | 39119 | 39969 | 34623 | 31777    | 33272   | Smarcc2  |        |
| Smarcd2  | 4915  | 6004  | 8104  | 7776  | 8229  | 6932  | 7152  | 9213  | 10869 | 13338 | 11340 | 16553 | 12740 | 14512 | 4999  | 5103  | 8508  | 7201  | 9080  | 6010  | 7519  | 14484 | 9708  | 14942 | 15078 | 17137 | 13109    | 14656   | Smarcd2  |        |
| Smarcd3  | 2686  | 2762  | 2668  | 2545  | 2307  | 2200  | 2059  | 2264  | 2871  | 2939  | 3166  | 2065  | 2428  | 2096  | 2498  | 2903  | 2602  | 2561  | 2237  | 1912  | 2073  | 1882  | 3374  | 2992  | 1888  | 3225  | 2107     | 2085    | Smarcd3  |        |
| Smarcd3  | 3353  | 3874  | 4074  | 4958  | 5462  | 4993  | 5259  | 4207  | 4788  | 5820  | 5277  | 6070  | 4111  | 6054  | 3112  | 2865  | 4614  | 4762  | 6108  | 4707  | 5506  | 5761  | 4891  | 6681  | 6360  | 6557  | 5586     | 5777    | Smarcd3  |        |
| Smarce1  | 18345 | 16453 | 19894 | 17811 | 17874 | 17874 | 20202 | 29441 | 24973 | 27099 | 24956 | 29713 | 27024 | 34287 | 18846 | 14943 | 19028 | 17139 | 19251 | 19818 | 20148 | 26759 | 24118 | 29996 | 29855 | 33762 | 30976    | 34505   | Smarce1  |        |
| Smbd1    | 0     | 3     | 0     | 0     | 0     | 5     | 0     | 0     | 2     | 6     | 0     | 0     | 0     | 0     | 0     | 0     | 0     | 0     | 0     | 0     | 0     | 2     | 1     | 0     | 0     | 0     | 0        | 1       | Smbd1    |        |
| Smc1a    | 18010 | 16123 | 16674 | 13909 | 13360 | 14768 | 15812 | 23526 | 21021 | 19078 | 18086 | 22778 | 19764 | 24566 | 18155 | 15123 | 15323 | 13008 | 14121 | 18015 | 14931 | 18449 | 19318 | 21038 | 19575 | 23914 | 23937    | 23010   | Smc1a    |        |
| Smc1b    | 31    | 22    | 34    | 30    | 26    | 54    | 28    | 51    | 38    | 30    | 51    | 50    | 50    | 35    | 36    | 71    | 39    | 8     | 24    | 38    | 28    | 50    | 50    | 29    | 32    | 57    | 55       | 47      | Smc1b    |        |
| Smc2     | 21679 | 16431 | 15349 | 12901 | 10856 | 13830 | 14972 | 16254 | 13798 | 10628 | 11005 | 17010 | 14410 | 17214 | 20653 | 18143 | 14443 | 12215 | 12494 | 17468 | 13325 | 9586  | 12505 | 12702 | 11778 | 15076 | 18169    | 16962   | Smc2     |        |
| Smc3     | 26180 | 22562 | 26115 | 24412 | 20728 | 22756 | 26232 | 21162 | 18262 | 18158 | 17065 | 21214 | 19165 | 22872 | 27576 | 24898 | 24809 | 23473 | 21655 | 24889 | 23788 | 18095 | 17133 | 20042 | 24892 | 24344 | 21847    | 21614   | Smc3     |        |
| Smc4     | 25806 | 18467 | 24783 | 19220 | 15234 | 18993 | 20798 | 21901 | 18821 | 17745 | 15966 | 26714 | 22745 | 25982 | 25996 | 21865 | 21554 | 17926 | 19253 | 23537 | 18790 | 14776 | 16973 | 21572 | 19006 | 29894 | 28081    | 27023   | Smc4     |        |
| Smc5     | 16318 | 12660 | 13034 | 14104 | 13363 | 14959 | 16652 | 12810 | 10899 | 8392  | 10549 | 11712 | 11313 | 12344 | 16793 | 14612 | 13070 | 13431 | 13493 | 15797 | 15359 | 10444 | 10012 | 10105 | 10204 | 9443  | 12699    | 12294   | Smc5     |        |
| Smc6     | 16948 | 12748 | 14883 |       |       |       |       |       |       |       |       |       |       |       |       |       |       |       |       |       |       |       |       |       |       |       |          |         |          |        |

|          |       |       |      |      |       |      |       |      |      |      |      |       |       |      |       |       |      |      |       |       |       |       |      |      |      |       |       |       |          |
|----------|-------|-------|------|------|-------|------|-------|------|------|------|------|-------|-------|------|-------|-------|------|------|-------|-------|-------|-------|------|------|------|-------|-------|-------|----------|
| Smm38    | 60    | 75    | 97   | 76   | 72    | 74   | 41    | 39   | 49   | 52   | 55   | 56    | 75    | 29   | 41    | 95    | 105  | 95   | 57    | 35    | 60    | 52    | 28   | 51   | 43   | 47    | 45    | 43    | Smm38    |
| Smm4     | 582   | 653   | 601  | 680  | 651   | 548  | 807   | 394  | 335  | 412  | 307  | 382   | 408   | 557  | 485   | 488   | 664  | 625  | 651   | 799   | 830   | 247   | 313  | 494  | 390  | 410   | 407   | 484   | Smm4     |
| Smm40    | 20    | 14    | 7    | 20   | 15    | 21   | 18    | 1    | 3    | 6    | 6    | 3     | 9     | 5    | 8     | 15    | 21   | 17   | 22    | 20    | 23    | 8     | 5    | 6    | 3    | 0     | 6     | Smm40 |          |
| Smm40-ps | 8     | 3     | 2    | 1    | 2     | 4    | 3     | 2    | 1    | 2    | 0    | 0     | 0     | 0    | 1     | 3     | 0    | 0    | 5     | 3     | 4     | 0     | 0    | 1    | 1    | 0     | 5     | 1     | Smm40-ps |
| Smm41    | 15    | 42    | 17   | 33   | 19    | 30   | 28    | 10   | 8    | 14   | 13   | 5     | 10    | 11   | 26    | 15    | 35   | 28   | 17    | 13    | 27    | 25    | 12   | 3    | 12   | 0     | 2     | 11    | Smm41    |
| Smm43    | 69    | 60    | 83   | 46   | 63    | 50   | 91    | 83   | 63   | 46   | 69   | 102   | 46    | 109  | 79    | 37    | 90   | 48   | 73    | 70    | 52    | 99    | 60   | 55   | 63   | 117   | 156   | 145   | Smm43    |
| Smm5     | 9     | 11    | 5    | 8    | 13    | 12   | 6     | 20   | 36   | 30   | 69   | 26    | 35    | 13   | 8     | 19    | 10   | 4    | 4     | 12    | 5     | 27    | 74   | 11   | 8    | 22    | 14    | 12    | Smm5     |
| Smm6     | 1     | 3     | 0    | 0    | 2     | 1    | 1     | 2    | 1    | 0    | 6    | 0     | 1     | 0    | 4     | 3     | 0    | 0    | 0     | 1     | 4     | 2     | 5    | 2    | 1    | 2     | 2     | 4     | Smm6     |
| Smm7     | 6361  | 5993  | 5609 | 5753 | 5545  | 5936 | 6251  | 7990 | 7166 | 6507 | 6649 | 7073  | 6628  | 6993 | 6727  | 5175  | 5836 | 5498 | 5892  | 6484  | 6067  | 7220  | 7345 | 6622 | 6918 | 7625  | 7254  | 7428  | Smm7     |
| Smm8     | 621   | 466   | 580  | 642  | 637   | 670  | 809   | 918  | 828  | 939  | 760  | 941   | 953   | 1060 | 764   | 491   | 679  | 555  | 605   | 804   | 723   | 866   | 889  | 929  | 936  | 1032  | 1047  | 993   | Smm8     |
| Smm9     | 3     | 2     | 13   | 8    | 0     | 3    | 3     | 7    | 6    | 14   | 3    | 4     | 9     | 10   | 8     | 5     | 0    | 2    | 5     | 6     | 3     | 5     | 4    | 1    | 5    | 3     | 12    | 4     | Smm9     |
| Smr1     | 2     | 1     | 2    | 0    | 4     | 1    | 2     | 0    | 2    | 1    | 1    | 3     | 3     | 0    | 1     | 4     | 0    | 0    | 12    | 3     | 6     | 0     | 4    | 0    | 5    | 1     | 1     | 1     | Smr1     |
| Smn1     | 2332  | 2580  | 3004 | 2508 | 1826  | 1849 | 2191  | 1871 | 1776 | 2139 | 1891 | 2494  | 2287  | 2554 | 2190  | 2315  | 2625 | 2030 | 2118  | 1936  | 2193  | 2114  | 1733 | 2222 | 2117 | 2747  | 2377  | 2707  | Smn1     |
| Snmcd1   | 4327  | 3217  | 4873 | 4365 | 3830  | 3960 | 4470  | 4495 | 3760 | 4476 | 4070 | 5364  | 4601  | 5510 | 4133  | 3414  | 4328 | 4022 | 4278  | 3578  | 4346  | 4720  | 3775 | 4815 | 4622 | 5956  | 4993  | 5842  | Snmcd1   |
| Smo      | 6180  | 6789  | 7069 | 4809 | 4228  | 5195 | 4282  | 7603 | 8691 | 7847 | 8487 | 10098 | 10258 | 9338 | 5571  | 6252  | 6258 | 4664 | 5205  | 4239  | 4120  | 7264  | 8967 | 9143 | 7426 | 12395 | 10669 | 10456 | Smo      |
| Smoc1    | 3324  | 3556  | 4607 | 3949 | 3841  | 3486 | 2196  | 2321 | 2595 | 2741 | 2709 | 2607  | 3725  | 2475 | 3282  | 4628  | 4792 | 3642 | 3377  | 2304  | 4820  | 3439  | 2753 | 2516 | 2582 | 2043  | 2920  | 2767  | Smoc1    |
| Smoc2    | 1940  | 1419  | 978  | 826  | 209   | 1027 | 75    | 1575 | 3494 | 2128 | 4493 | 1084  | 2256  | 961  | 1626  | 1977  | 869  | 1268 | 198   | 118   | 65    | 2022  | 4040 | 1871 | 1259 | 1117  | 1275  | 1027  | Smoc2    |
| Smox     | 1775  | 1875  | 1947 | 2036 | 2269  | 2043 | 1840  | 1939 | 2344 | 2559 | 2412 | 2573  | 2363  | 2208 | 1534  | 1905  | 2070 | 2030 | 2367  | 1726  | 1918  | 2249  | 2214 | 2589 | 2633 | 2888  | 2432  | 2059  | Smox     |
| Smpd1    | 2763  | 3284  | 2531 | 2966 | 3363  | 3504 | 2883  | 2651 | 2932 | 3131 | 2651 | 2723  | 2603  | 2365 | 2771  | 2995  | 2855 | 3142 | 3249  | 3257  | 3061  | 2625  | 3070 | 2618 | 2729 | 2586  | 2642  | 2497  | Smpd1    |
| Smpd2    | 2460  | 2867  | 2535 | 2407 | 2014  | 2101 | 2130  | 1540 | 1654 | 1607 | 1381 | 1690  | 1504  | 1619 | 2133  | 2313  | 2192 | 2366 | 2268  | 2331  | 2067  | 1422  | 1658 | 1616 | 1410 | 2115  | 1705  | 1716  | Smpd2    |
| Smpd3    | 3310  | 4781  | 4881 | 6175 | 7257  | 5718 | 6166  | 3894 | 4361 | 5501 | 4342 | 4540  | 3567  | 4413 | 4017  | 3740  | 6391 | 6504 | 7130  | 5383  | 6697  | 6059  | 3763 | 5082 | 6201 | 3561  | 3583  | 3942  | Smpd3    |
| Smpd4    | 5736  | 5857  | 5008 | 4596 | 4279  | 4411 | 4856  | 5528 | 5890 | 5533 | 5283 | 6311  | 5999  | 6247 | 4952  | 5373  | 4813 | 4217 | 4788  | 4942  | 4602  | 5297  | 5333 | 6030 | 5893 | 7358  | 6328  | 6534  | Smpd4    |
| Smpd5    | 45    | 35    | 28   | 30   | 37    | 44   | 21    | 46   | 100  | 71   | 65   | 65    | 62    | 48   | 32    | 61    | 34   | 21   | 30    | 33    | 20    | 70    | 80   | 61   | 68   | 89    | 51    | 40    | Smpd5    |
| Smpdi3a  | 573   | 610   | 483  | 468  | 702   | 526  | 513   | 949  | 929  | 726  | 718  | 634   | 849   | 575  | 789   | 674   | 538  | 530  | 526   | 621   | 552   | 846   | 954  | 598  | 684  | 634   | 662   | 634   | Smpdi3a  |
| Smpdi3b  | 48    | 33    | 53   | 21   | 15    | 55   | 32    | 129  | 130  | 113  | 126  | 113   | 116   | 132  | 32    | 42    | 27   | 46   | 38    | 51    | 25    | 80    | 151  | 148  | 144  | 190   | 122   | 153   | Smpdi3b  |
| Smpx     | 7     | 0     | 0    | 0    | 2     | 3    | 0     | 20   | 28   | 1    | 261  | 0     | 0     | 3    | 5     | 3     | 0    | 3    | 0     | 5     | 0     | 23    | 229  | 2    | 5    | 0     | 0     | 2     | Smpx     |
| Smr2l    | 0     | 0     | 0    | 0    | 0     | 0    | 0     | 0    | 0    | 0    | 0    | 0     | 0     | 0    | 0     | 0     | 0    | 0    | 0     | 0     | 0     | 0     | 0    | 0    | 0    | 0     | 0     | 0     | Smr2l    |
| Sms      | 7309  | 6031  | 7495 | 7357 | 8668  | 8021 | 9284  | 9607 | 8179 | 8949 | 7905 | 9204  | 8763  | 9958 | 7752  | 6809  | 7616 | 7542 | 8228  | 9052  | 8671  | 10176 | 8352 | 9034 | 9706 | 9211  | 8951  | 9956  | Sms      |
| Smnt     | 2644  | 3697  | 3537 | 3146 | 2389  | 2552 | 1881  | 1469 | 2025 | 2116 | 2790 | 2552  | 2389  | 2150 | 2574  | 3780  | 3327 | 3067 | 2582  | 1830  | 2041  | 1917  | 2377 | 2353 | 2011 | 2619  | 2398  | 2239  | Smnt     |
| Smtnl1   | 1     | 4     | 2    | 3    | 3     | 0    | 2     | 5    | 2    | 2    | 1    | 0     | 1     | 3    | 0     | 0     | 0    | 0    | 0     | 0     | 1     | 3     | 6    | 3    | 0    | 1     | 0     | 5     | Smtnl1   |
| Smtnl2   | 852   | 888   | 1014 | 771  | 507   | 589  | 455   | 249  | 426  | 386  | 612  | 179   | 271   | 193  | 702   | 1112  | 870  | 778  | 503   | 386   | 400   | 322   | 590  | 325  | 167  | 349   | 156   | 172   | Smtnl2   |
| Smu1     | 11480 | 10351 | 9849 | 8413 | 7264  | 7992 | 8861  | 9624 | 8050 | 6775 | 6806 | 8662  | 7791  | 8441 | 11151 | 10064 | 9378 | 8207 | 8429  | 10332 | 8415  | 7085  | 7991 | 7533 | 7473 | 9310  | 8914  | 8945  | Smu1     |
| Smu2     | 1607  | 1587  | 1615 | 1585 | 2254  | 1732 | 1747  | 2483 | 2455 | 2696 | 3413 | 2599  | 2381  | 2618 | 1770  | 1368  | 1860 | 1562 | 1839  | 1757  | 1770  | 2578  | 2856 | 2519 | 2693 | 2528  | 2509  | 2749  | Smu2     |
| Smurf1   | 3899  | 4285  | 5137 | 5706 | 6943  | 6134 | 5688  | 4632 | 5404 | 6176 | 6053 | 6090  | 5608  | 5519 | 3745  | 3825  | 5565 | 5939 | 7065  | 4829  | 6071  | 6909  | 5290 | 5954 | 6928 | 4933  | 5531  | 5533  | Smurf1   |
| Smurf2   | 8483  | 7508  | 6887 | 7300 | 7185  | 7454 | 7345  | 9813 | 8566 | 7731 | 7816 | 8039  | 8094  | 8527 | 8296  | 7794  | 6581 | 7436 | 7102  | 8179  | 7832  | 8071  | 8564 | 7480 | 8324 | 6979  | 8311  | 8420  | Smurf2   |
| Smyd1    | 181   | 119   | 93   | 252  | 153   | 87   | 169   | 143  | 340  | 92   | 1946 | 50    | 161   | 57   | 181   | 138   | 146  | 164  | 139   | 105   | 175   | 241   | 1145 | 79   | 75   | 44    | 51    | 50    | Smyd1    |
| Smyd2    | 1899  | 1841  | 1651 | 1592 | 1762  | 1610 | 1422  | 2070 | 2484 | 2096 | 2323 | 1877  | 1988  | 1749 | 1601  | 1822  | 1702 | 1652 | 1605  | 1493  | 1473  | 1968  | 2419 | 2064 | 2050 | 2226  | 1835  | 1918  | Smyd2    |
| Smyd3    | 1732  | 1534  | 1542 | 1713 | 1868  | 1453 | 1542  | 1136 | 1130 | 1074 | 1069 | 818   | 979   | 915  | 1506  | 1520  | 1461 | 1809 | 1588  | 1395  | 1516  | 1131  | 1126 | 1052 | 1148 | 962   | 908   | 900   | Smyd3    |
| Smyd4    | 839   | 917   | 691  | 715  | 734   | 906  | 849   | 1055 | 999  | 962  | 979  | 1069  | 862   | 1042 | 756   | 850   | 721  | 809  | 760   | 817   | 830   | 849   | 966  | 994  | 951  | 1089  | 1099  | 1066  | Smyd4    |
| Smyd5    | 1961  | 2068  | 2097 | 1819 | 1861  | 1942 | 1677  | 2452 | 2698 | 2612 | 2795 | 2870  | 2999  | 2689 | 1905  | 1959  | 1833 | 1723 | 1923  | 1722  | 1783  | 2789  | 2861 | 2638 | 2790 | 3007  | 2788  | 3026  | Smyd5    |
| Sna1     | 723   | 958   | 701  | 596  | 275   | 471  | 154   | 622  | 779  | 738  | 724  | 416   | 559   | 341  | 542   | 1329  | 560  | 476  | 224   | 167   | 135   | 518   | 907  | 755  | 334  | 777   | 459   | 412   | Sna1     |
| Sna2     | 1225  | 745   | 928  | 454  | 206   | 453  | 151   | 992  | 1384 | 945  | 1275 | 737   | 1081  | 722  | 865   | 1206  | 495  | 540  | 178   | 207   | 137   | 700   | 1450 | 888  | 501  | 941   | 726   | 744   | Sna2     |
| Sna3     | 25    | 10    | 0    | 3    | 6     | 1    | 1     | 4    | 9    | 9    | 17   | 0     | 5     | 0    | 7     | 3     | 0    | 2    | 8     | 0     | 7     | 25    | 6    | 0    | 8    | 0     | 1     | Sna3  |          |
| Snap23   | 7328  | 5719  | 7537 | 5749 | 4160  | 5040 | 4944  | 3990 | 3681 | 3628 | 4408 | 4009  | 4671  | 4343 | 6451  | 6748  | 5872 | 5426 | 4597  | 4774  | 4653  | 3663  | 4088 | 4010 | 3549 | 4998  | 4302  | 4697  | Snap23   |
| Snap25   | 5568  | 5403  | 5521 | 8183 | 10611 | 8521 | 10047 | 5283 | 4748 | 5301 | 4691 | 4116  | 4238  | 4457 | 7391  | 5966  | 7136 | 8648 | 8704  | 8372  | 9896  | 7235  | 4739 | 4527 | 5952 | 3215  | 3771  | 3839  | Snap25   |
| Snap29   | 5887  | 5826  | 5070 | 5812 | 5477  | 5627 | 6106  | 4749 | 4116 | 4105 | 3974 | 3719  | 3780  | 3852 | 6265  | 5430  | 5515 | 5965 | 5577  | 5508  | 6113  | 4809  | 4094 | 3957 | 4260 | 3670  | 3699  | 4012  | Snap29   |
| Snap47   | 5842  | 6758  | 4613 | 5951 | 8468  | 7123 | 7787  | 9297 | 8829 | 8163 | 7639 | 6213  | 6408  | 6502 | 6589  | 5912  | 5903 | 7039 | 7904  | 8485  | 8194  | 9245  | 8958 | 7297 | 8159 | 6293  | 6198  | 6086  | Snap47   |
| Snap91   | 4702  | 5256  | 4602 | 8416 | 12579 | 9595 | 10561 | 7984 | 7185 | 8070 | 7353 | 5857  | 5736  | 5588 | 6129  | 4939  | 6397 | 9865 | 10015 | 9650  | 11296 | 10574 | 6717 | 6620 | 9125 | 3843  | 4775  | 4927  | Snap91   |
| Snapc1   | 4894  | 4462  | 4160 | 5486 | 5219  | 5352 | 5766  | 3623 | 3242 | 3098 | 2971 | 3247  | 2887  | 3385 | 5451  | 4739  | 4715 | 5646 | 4913  | 5588  | 5815  | 3811  | 3114 | 3130 | 3420 | 2635  | 3155  | 3090  | Snapc1   |
| Snapc2   | 1807  | 2108  | 2196 | 2040 | 1775  | 1990 | 1998  | 1508 | 1727 | 1676 | 1590 | 1857  | 1762  | 1828 | 1664  | 1899  | 2065 | 1935 | 2223  | 1713  | 1943  | 1771  | 1693 | 1763 | 1807 | 2008  | 1812  | 1907  | Snapc2   |
| Snapc3   | 463   |       |      |      |       |      |       |      |      |      |      |       |       |      |       |       |      |      |       |       |       |       |      |      |      |       |       |       |          |



|        |       |       |       |       |       |       |       |       |       |       |       |       |       |       |       |       |       |       |       |       |       |       |       |       |       |       |       |       |        |       |
|--------|-------|-------|-------|-------|-------|-------|-------|-------|-------|-------|-------|-------|-------|-------|-------|-------|-------|-------|-------|-------|-------|-------|-------|-------|-------|-------|-------|-------|--------|-------|
| Snrpc  | 4127  | 5263  | 5452  | 4917  | 3791  | 4224  | 4465  | 3505  | 3930  | 3645  | 3861  | 4443  | 4347  | 5667  | 4001  | 4412  | 5107  | 4123  | 4690  | 4307  | 4511  | 3285  | 3916  | 4873  | 4205  | 5841  | 4708  | 5110  | Snrpc  |       |
| Snrpd1 | 7999  | 7039  | 9513  | 8288  | 7018  | 8016  | 9065  | 9017  | 8190  | 8547  | 8692  | 9797  | 9799  | 12683 | 8301  | 6775  | 8671  | 7013  | 8184  | 9785  | 8316  | 7265  | 7787  | 10366 | 9889  | 13076 | 11353 | 12957 | Snrpd1 |       |
| Snrpd2 | 8143  | 9686  | 9188  | 9333  | 7381  | 8120  | 8371  | 6328  | 6645  | 6639  | 7178  | 7172  | 8402  | 8747  | 7721  | 7299  | 9114  | 8107  | 9097  | 9917  | 8796  | 4782  | 6616  | 8228  | 7554  | 9055  | 9397  | 9375  | Snrpd2 |       |
| Snrpd3 | 12157 | 11688 | 14688 | 13147 | 10441 | 10843 | 12436 | 9701  | 8592  | 8586  | 9138  | 10489 | 10204 | 12043 | 12511 | 10244 | 13486 | 11820 | 11988 | 13095 | 11963 | 8134  | 8341  | 11083 | 10426 | 13765 | 12119 | 12721 | Snrpd3 |       |
| Snrpe  | 6262  | 5319  | 6739  | 6137  | 5342  | 5199  | 8417  | 6836  | 5249  | 6576  | 6144  | 7239  | 7431  | 10043 | 6254  | 4911  | 6399  | 5187  | 5863  | 7113  | 7454  | 4662  | 5503  | 8087  | 6969  | 9111  | 8165  | 10792 | Snrpe  |       |
| Snrpf  | 3073  | 3327  | 4277  | 3626  | 2482  | 2337  | 3548  | 2876  | 2378  | 3054  | 2985  | 3338  | 3178  | 4959  | 2880  | 2146  | 3881  | 2999  | 2831  | 3118  | 3317  | 2201  | 2153  | 4264  | 3334  | 4227  | 3568  | 4603  | Snrpf  |       |
| Snrpg  | 6147  | 6208  | 6987  | 6721  | 4675  | 3986  | 8451  | 5401  | 4294  | 5714  | 5533  | 5787  | 5530  | 9452  | 5848  | 3831  | 6694  | 5093  | 5181  | 6491  | 7043  | 3688  | 3998  | 7302  | 5717  | 7321  | 6401  | 9600  | Snrpg  |       |
| Snrpn  | 2705  | 2917  | 2672  | 3598  | 4023  | 2755  | 4613  | 3894  | 2873  | 3224  | 2867  | 3295  | 2339  | 4203  | 3104  | 1689  | 3472  | 3350  | 3548  | 3078  | 5243  | 4428  | 2738  | 3536  | 3987  | 2544  | 2607  | 3540  | Snrpn  |       |
| Snta1  | 1009  | 1275  | 1198  | 1137  | 1003  | 874   | 931   | 366   | 431   | 388   | 446   | 333   | 414   | 329   | 881   | 1174  | 1166  | 1088  | 990   | 936   | 949   | 433   | 526   | 427   | 418   | 433   | 375   | 407   | Snta1  |       |
| Sntb1  | 268   | 163   | 183   | 160   | 182   | 168   | 66    | 401   | 456   | 385   | 790   | 292   | 481   | 253   | 174   | 273   | 130   | 169   | 104   | 111   | 104   | 386   | 680   | 284   | 227   | 368   | 266   | 304   | Sntb1  |       |
| Sntb2  | 3680  | 3050  | 2539  | 3098  | 2677  | 3206  | 2552  | 2174  | 2403  | 2162  | 3106  | 2085  | 2237  | 2328  | 3150  | 3472  | 2481  | 2947  | 2346  | 2480  | 2736  | 2281  | 2602  | 1890  | 2107  | 1656  | 2229  | 2108  | Sntb2  |       |
| Sntg1  | 235   | 242   | 173   | 326   | 439   | 404   | 501   | 434   | 421   | 335   | 304   | 275   | 194   | 318   | 327   | 145   | 256   | 285   | 408   | 476   | 497   | 475   | 284   | 265   | 437   | 235   | 259   | 298   | Sntg1  |       |
| Sntg2  | 35    | 38    | 27    | 57    | 64    | 70    | 64    | 78    | 54    | 49    | 52    | 50    | 44    | 33    | 42    | 37    | 60    | 59    | 64    | 70    | 59    | 58    | 65    | 40    | 41    | 21    | 55    | 40    | Sntg2  |       |
| Sntn   | 0     | 0     | 0     | 0     | 0     | 0     | 0     | 0     | 0     | 0     | 0     | 0     | 0     | 0     | 0     | 0     | 0     | 0     | 0     | 0     | 1     | 0     | 0     | 0     | 0     | 0     | 0     | 1     | Sntn   |       |
| Snu13  | 9823  | 9694  | 8176  | 8060  | 6908  | 7660  | 8888  | 7320  | 7479  | 5712  | 6022  | 6460  | 6370  | 7241  | 9542  | 9271  | 8066  | 7823  | 7904  | 9859  | 8590  | 6010  | 7253  | 6347  | 6172  | 7950  | 7232  | 7735  | Snu13  |       |
| Snu14  | 1403  | 1534  | 1608  | 1572  | 1291  | 1345  | 1483  | 1058  | 987   | 966   | 1038  | 1100  | 1002  | 1103  | 1419  | 1445  | 1523  | 1426  | 1431  | 1507  | 1496  | 967   | 959   | 1057  | 1129  | 1081  | 1026  | 1143  | Snu14  |       |
| Snu17  | 7413  | 6764  | 7830  | 6492  | 6098  | 6539  | 7097  | 11685 | 9713  | 9798  | 9071  | 10896 | 10054 | 11804 | 7763  | 6525  | 6868  | 5790  | 6422  | 7492  | 6513  | 9075  | 9565  | 10581 | 9645  | 12526 | 11273 | 12129 | Snu17  |       |
| Snx1   | 8008  | 8593  | 8045  | 6933  | 5967  | 6439  | 6617  | 6789  | 6386  | 5799  | 5980  | 6204  | 6062  | 6234  | 8178  | 7671  | 7426  | 6691  | 6996  | 7610  | 6678  | 5559  | 6669  | 6098  | 5869  | 6820  | 6740  | 6527  | Snx1   |       |
| Snx10  | 2413  | 2136  | 2925  | 2565  | 3256  | 2956  | 3155  | 2739  | 2115  | 2366  | 2203  | 2301  | 2312  | 2674  | 2894  | 2479  | 2896  | 2678  | 2985  | 3120  | 3101  | 2642  | 2179  | 2430  | 2689  | 2393  | 2730  | 2811  | Snx10  |       |
| Snx11  | 4207  | 5033  | 4695  | 5795  | 5343  | 5028  | 4568  | 2958  | 2985  | 3795  | 3682  | 3625  | 3327  | 3351  | 4038  | 4212  | 5375  | 5317  | 5195  | 4443  | 4729  | 3412  | 3009  | 3482  | 3762  | 3340  | 3479  | 3279  | Snx11  |       |
| Snx12  | 3982  | 3863  | 4481  | 3917  | 3969  | 4166  | 4222  | 4644  | 4200  | 4504  | 4477  | 5447  | 5094  | 5362  | 3993  | 3351  | 4244  | 3634  | 4392  | 4089  | 4195  | 4602  | 4264  | 5114  | 5375  | 5723  | 5953  | 5892  | Snx12  |       |
| Snx13  | 3516  | 2803  | 2454  | 2871  | 3521  | 3431  | 3711  | 4555  | 4112  | 3761  | 3797  | 3590  | 3483  | 3696  | 3820  | 3008  | 2675  | 3060  | 2907  | 3684  | 3249  | 4152  | 4215  | 3404  | 3620  | 2812  | 3499  | 3523  | Snx13  |       |
| Snx14  | 4340  | 3891  | 3841  | 4186  | 4153  | 4144  | 4803  | 2545  | 2338  | 2364  | 2534  | 2393  | 2415  | 2364  | 4366  | 4092  | 3851  | 4391  | 3970  | 4200  | 4343  | 2638  | 2432  | 2159  | 2245  | 2117  | 2352  | 2239  | Snx14  |       |
| Snx15  | 559   | 730   | 769   | 656   | 893   | 824   | 730   | 1042  | 1255  | 1545  | 1330  | 1149  | 1148  | 1197  | 568   | 634   | 858   | 772   | 874   | 676   | 768   | 1206  | 1260  | 1258  | 1359  | 1159  | 1139  | 1127  | Snx15  |       |
| Snx16  | 1813  | 1706  | 1775  | 2080  | 2493  | 2210  | 2620  | 2417  | 2054  | 1799  | 1945  | 1403  | 1359  | 1560  | 2134  | 1851  | 2015  | 2517  | 2266  | 2657  | 2575  | 2433  | 2152  | 1684  | 2032  | 1355  | 1385  | 1428  | Snx16  |       |
| Snx17  | 5980  | 6989  | 6549  | 5862  | 5347  | 5549  | 5540  | 5801  | 6096  | 5478  | 5621  | 6826  | 5909  | 6076  | 5847  | 5670  | 6408  | 5431  | 6287  | 5531  | 5673  | 5681  | 6183  | 6196  | 6098  | 7166  | 6958  | 6750  | Snx17  |       |
| Snx18  | 4557  | 4576  | 4572  | 4360  | 3748  | 3683  | 3465  | 3059  | 3395  | 3249  | 3750  | 2765  | 3295  | 2746  | 4412  | 5314  | 4397  | 4653  | 3504  | 3180  | 3640  | 3153  | 3546  | 3099  | 2839  | 3491  | 2912  | 3052  | Snx18  |       |
| Snx19  | 4146  | 3984  | 3838  | 3648  | 3892  | 3733  | 3536  | 4586  | 4835  | 4988  | 4782  | 5399  | 5125  | 4928  | 4162  | 3998  | 3833  | 3895  | 3711  | 3423  | 3686  | 5081  | 4746  | 4725  | 4982  | 4687  | 5367  | 5298  | Snx19  |       |
| Snx2   | 10567 | 8601  | 9454  | 8105  | 6686  | 7780  | 7844  | 7364  | 7032  | 5667  | 6720  | 6450  | 7021  | 6856  | 10439 | 9899  | 8187  | 8502  | 6697  | 8377  | 7274  | 6834  | 7855  | 6033  | 9895  | 7383  | 7008  | 6977  | Snx2   |       |
| Snx20  | 44    | 54    | 27    | 42    | 36    | 37    | 29    | 43    | 36    | 34    | 50    | 23    | 57    | 20    | 37    | 39    | 39    | 39    | 34    | 37    | 50    | 33    | 47    | 72    | 56    | 24    | 31    | 28    | 42     | Snx20 |
| Snx21  | 1007  | 1143  | 1014  | 957   | 1015  | 893   | 873   | 552   | 693   | 642   | 700   | 505   | 516   | 517   | 901   | 1045  | 941   | 978   | 909   | 949   | 902   | 645   | 776   | 590   | 573   | 575   | 533   | 479   | Snx21  |       |
| Snx22  | 696   | 828   | 774   | 715   | 668   | 641   | 610   | 201   | 264   | 282   | 298   | 186   | 229   | 138   | 698   | 873   | 700   | 634   | 711   | 669   | 566   | 216   | 257   | 243   | 232   | 244   | 178   | 147   | Snx22  |       |
| Snx24  | 945   | 767   | 1081  | 587   | 551   | 619   | 470   | 1082  | 1018  | 961   | 986   | 1133  | 1279  | 1139  | 945   | 963   | 788   | 599   | 512   | 529   | 432   | 956   | 1061  | 1008  | 962   | 1319  | 1223  | 1215  | Snx24  |       |
| Snx25  | 4000  | 3672  | 4032  | 3675  | 3542  | 3550  | 3898  | 1961  | 1746  | 1851  | 2005  | 1686  | 1715  | 1589  | 3960  | 3727  | 3590  | 3895  | 3677  | 3922  | 3873  | 2005  | 1874  | 1694  | 1747  | 1692  | 1603  | 1620  | Snx25  |       |
| Snx27  | 11340 | 10751 | 10275 | 11669 | 13237 | 12590 | 13685 | 10903 | 9718  | 10566 | 10160 | 10892 | 9652  | 10818 | 11298 | 9963  | 11296 | 12569 | 12651 | 11730 | 13846 | 11718 | 9578  | 10598 | 11753 | 8425  | 10382 | 10913 | Snx27  |       |
| Snx29  | 1271  | 1495  | 1015  | 1495  | 1586  | 1513  | 1418  | 1229  | 1278  | 1270  | 1237  | 1175  | 1192  | 1215  | 1237  | 1293  | 1431  | 1510  | 1634  | 1463  | 1564  | 1312  | 1235  | 1028  | 1528  | 528   | 1292  | 1061  | Snx29  |       |
| Snx3   | 5523  | 5722  | 6069  | 5607  | 5132  | 5042  | 6360  | 4281  | 4610  | 4803  | 5019  | 4700  | 4571  | 5006  | 5304  | 5102  | 6154  | 5498  | 5631  | 5220  | 5958  | 4761  | 4970  | 5331  | 4545  | 5779  | 4522  | 5328  | Snx3   |       |
| Snx30  | 6990  | 7074  | 6574  | 8187  | 8691  | 8967  | 8142  | 3959  | 3643  | 4056  | 4099  | 3808  | 4065  | 3942  | 7212  | 7259  | 7609  | 8348  | 8136  | 7638  | 8594  | 4381  | 3811  | 3493  | 4328  | 2755  | 3747  | 3768  | Snx30  |       |
| Snx31  | 98    | 75    | 123   | 41    | 28    | 67    | 22    | 57    | 80    | 49    | 36    | 26    | 45    | 26    | 128   | 129   | 57    | 77    | 27    | 30    | 12    | 17    | 86    | 42    | 11    | 9     | 26    | 38    | Snx31  |       |
| Snx32  | 2077  | 3080  | 2719  | 3408  | 3925  | 3403  | 3628  | 2450  | 2359  | 2792  | 2331  | 2157  | 1990  | 2367  | 2600  | 2451  | 3412  | 3880  | 3822  | 3554  | 3795  | 3145  | 2249  | 2522  | 3005  | 1961  | 1885  | 2008  | Snx32  |       |
| Snx33  | 686   | 652   | 814   | 660   | 796   | 684   | 531   | 815   | 985   | 866   | 1213  | 973   | 1144  | 845   | 614   | 713   | 729   | 643   | 734   | 537   | 567   | 725   | 1132  | 1099  | 866   | 1258  | 1077  | 991   | Snx33  |       |
| Snx4   | 6598  | 5399  | 5557  | 5068  | 5114  | 5480  | 5816  | 6177  | 5603  | 5056  | 5056  | 5245  | 5420  | 5237  | 6956  | 5731  | 5628  | 5382  | 4987  | 6409  | 5519  | 5695  | 5829  | 5037  | 4890  | 5537  | 5318  | 5423  | Snx4   |       |
| Snx5   | 11605 | 8727  | 10598 | 8840  | 7211  | 7800  | 8525  | 11267 | 10852 | 9366  | 10690 | 11041 | 11252 | 11225 | 11236 | 10260 | 8773  | 8098  | 7793  | 8117  | 7633  | 9752  | 11698 | 10243 | 9193  | 13339 | 11196 | 11605 | Snx5   |       |
| Snx6   | 10716 | 9482  | 10401 | 8281  | 8613  | 8239  | 10029 | 10796 | 9816  | 8731  | 8742  | 9102  | 9095  | 10429 | 11314 | 9953  | 9352  | 8782  | 8299  | 10052 | 9062  | 9067  | 10078 | 9047  | 8878  | 10605 | 10091 | 10633 | Snx6   |       |
| Snx7   | 450   | 459   | 589   | 413   | 483   | 408   | 383   | 517   | 592   | 445   | 643   | 495   | 523   | 445   | 567   | 589   | 428   | 495   | 353   | 392   | 328   | 523   | 706   | 473   | 447   | 543   | 502   | 489   | Snx7   |       |
| Snx8   | 2569  | 3657  | 3268  | 3646  | 3152  | 3018  | 2762  | 1481  | 1767  | 1708  | 2023  | 1883  | 1862  | 1788  | 2772  | 3154  | 3246  | 3430  | 3314  | 2719  | 2926  | 1810  | 1911  | 1770  | 1887  | 1980  | 1973  | 1832  | Snx8   |       |
| Snx9   | 856   | 803   | 944   | 597   | 656   | 696   | 422   | 1621  | 2157  | 1909  | 2420  | 1685  | 2003  | 1827  | 774   | 1044  | 644   | 679   | 521   | 501   | 456   |       |       |       |       |       |       |       |        |       |

|         |       |       |       |       |       |       |       |       |       |       |       |       |       |       |       |       |       |       |       |       |       |       |       |       |       |        |       |       |        |         |
|---------|-------|-------|-------|-------|-------|-------|-------|-------|-------|-------|-------|-------|-------|-------|-------|-------|-------|-------|-------|-------|-------|-------|-------|-------|-------|--------|-------|-------|--------|---------|
| Sowahb  | 88    | 92    | 10    | 45    | 25    | 22    | 21    | 38    | 36    | 32    | 28    | 5     | 31    | 11    | 57    | 83    | 24    | 55    | 23    | 10    | 23    | 3     | 32    | 34    | 1     | 43     | 9     | 9     | Sowahb |         |
| Sowahc  | 3186  | 3162  | 3005  | 3653  | 3016  | 3206  | 3416  | 1958  | 1931  | 1872  | 1848  | 1948  | 2031  | 2049  | 3277  | 3293  | 3176  | 3711  | 3090  | 3164  | 3407  | 2037  | 2051  | 1860  | 1926  | 1981   | 2027  | 2098  | Sowahc |         |
| Sowahd  | 1     | 2     | 3     | 6     | 8     | 2     | 0     | 2     | 0     | 1     | 0     | 0     | 0     | 4     | 0     | 1     | 2     | 4     | 7     | 3     | 0     | 1     | 1     | 0     | 0     | 0      | 0     | 0     | Sowahd |         |
| Sox1    | 2957  | 2973  | 4750  | 4808  | 4204  | 3569  | 5015  | 3662  | 3267  | 4311  | 3144  | 6859  | 3382  | 7107  | 3000  | 1812  | 5517  | 4163  | 5284  | 3092  | 5265  | 4831  | 2172  | 6310  | 5431  | 8049   | 5391  | 6378  | Sox1   |         |
| Sox10   | 305   | 351   | 119   | 128   | 513   | 58    | 21    | 540   | 801   | 680   | 1078  | 135   | 667   | 105   | 384   | 614   | 256   | 199   | 53    | 22    | 39    | 792   | 645   | 394   | 340   | 390    | 129   | 106   | Sox10  |         |
| Sox11   | 35722 | 30233 | 60570 | 66277 | 61057 | 54869 | 65269 | 61505 | 52012 | 72934 | 54355 | 81508 | 62723 | 84813 | 38469 | 32062 | 67554 | 63345 | 65876 | 47252 | 63768 | 84288 | 44575 | 91089 | 90399 | 112676 | 72235 | 84591 | Sox11  |         |
| Sox12   | 6256  | 7663  | 8174  | 7787  | 8632  | 8204  | 7717  | 10050 | 11002 | 13432 | 11054 | 14010 | 11908 | 12434 | 6117  | 6463  | 9071  | 7657  | 9521  | 7348  | 8190  | 12389 | 10002 | 13460 | 13099 | 14797  | 11950 | 12248 | Sox12  |         |
| Sox13   | 1694  | 2249  | 3465  | 2252  | 2093  | 1776  | 1330  | 1737  | 1730  | 2140  | 11861 | 2948  | 2969  | 2597  | 1534  | 2223  | 2928  | 1800  | 2183  | 1556  | 1600  | 2146  | 1684  | 2484  | 2112  | 2613   | 3039  | 3183  | Sox13  |         |
| Sox14   | 280   | 289   | 433   | 682   | 808   | 679   | 494   | 766   | 470   | 1033  | 655   | 819   | 982   | 686   | 332   | 248   | 585   | 588   | 886   | 699   | 748   | 1288  | 595   | 954   | 1155  | 205    | 734   | 662   | Sox14  |         |
| Sox15   | 9     | 10    | 0     | 3     | 8     | 10    | 7     | 4     | 3     | 11    | 6     | 11    | 3     | 3     | 1     | 9     | 9     | 8     | 9     | 10    | 8     | 3     | 4     | 5     | 10    | 11     | 14    | 6     | Sox15  |         |
| Sox17   | 195   | 189   | 345   | 289   | 345   | 285   | 264   | 325   | 362   | 396   | 455   | 434   | 505   | 458   | 212   | 232   | 273   | 294   | 309   | 235   | 307   | 394   | 403   | 462   | 568   | 537    | 493   | 398   | Sox17  |         |
| Sox18   | 393   | 339   | 346   | 232   | 267   | 232   | 179   | 493   | 696   | 504   | 696   | 452   | 627   | 375   | 284   | 372   | 290   | 249   | 283   | 173   | 149   | 510   | 832   | 558   | 445   | 624    | 459   | 395   | Sox18  |         |
| Sox2    | 6620  | 5943  | 11009 | 9976  | 8716  | 7968  | 10810 | 8802  | 6671  | 9978  | 7611  | 14846 | 9050  | 16602 | 6618  | 4123  | 11470 | 8694  | 10382 | 7588  | 10513 | 9825  | 6313  | 14267 | 11741 | 18945  | 12487 | 15497 | Sox2   |         |
| Sox21   | 2558  | 2407  | 4261  | 3488  | 3309  | 2987  | 3341  | 3217  | 2590  | 3229  | 2300  | 5130  | 3751  | 4791  | 2401  | 1878  | 4086  | 3133  | 3985  | 2887  | 3513  | 3283  | 2025  | 4569  | 3780  | 4430   | 4213  | 4736  | Sox21  |         |
| Sox3    | 1939  | 2847  | 3738  | 3640  | 2189  | 2205  | 2167  | 1269  | 1271  | 1767  | 1395  | 3448  | 2113  | 2920  | 1548  | 1550  | 3897  | 2999  | 3115  | 2131  | 2417  | 1384  | 1011  | 2839  | 2245  | 3946   | 2621  | 2804  | Sox3   |         |
| Sox30   | 68    | 75    | 76    | 80    | 82    | 65    | 66    | 37    | 43    | 74    | 36    | 70    | 54    | 46    | 71    | 79    | 71    | 63    | 79    | 53    | 68    | 48    | 45    | 38    | 44    | 59     | 46    | 40    | Sox30  |         |
| Sox4    | 31847 | 30130 | 38130 | 49572 | 49361 | 45613 | 56331 | 55371 | 49326 | 57233 | 51480 | 60183 | 45012 | 67249 | 34862 | 26810 | 42559 | 49489 | 51670 | 44408 | 58400 | 64280 | 47012 | 66573 | 69997 | 59624  | 54522 | 63146 | Sox4   |         |
| Sox5    | 4735  | 4270  | 3423  | 4996  | 5368  | 5921  | 6822  | 5650  | 6575  | 6476  | 5638  | 5555  | 3695  | 5984  | 4983  | 3626  | 4422  | 4855  | 5719  | 5712  | 6557  | 5690  | 4700  | 6511  | 8461  | 4972   | 4991  | 4651  | Sox5   |         |
| Sox6    | 4593  | 4323  | 3486  | 4302  | 4554  | 6506  | 6642  | 5217  | 6366  | 6217  | 5964  | 7811  | 5082  | 7772  | 4549  | 3326  | 4238  | 4343  | 5315  | 5723  | 6125  | 5673  | 5114  | 6462  | 7484  | 5784   | 7229  | 6524  | Sox6   |         |
| Sox7    | 270   | 286   | 420   | 293   | 353   | 276   | 285   | 482   | 470   | 583   | 662   | 485   | 627   | 501   | 291   | 326   | 293   | 328   | 305   | 234   | 291   | 643   | 544   | 580   | 531   | 651    | 492   | 476   | Sox7   |         |
| Sox8    | 761   | 926   | 650   | 1147  | 1010  | 905   | 923   | 793   | 850   | 937   | 967   | 754   | 413   | 698   | 737   | 879   | 983   | 1219  | 1079  | 747   | 1047  | 872   | 741   | 920   | 913   | 746    | 493   | 438   | Sox8   |         |
| Sox9    | 3066  | 3409  | 5615  | 5002  | 3573  | 3818  | 3605  | 4628  | 4949  | 6986  | 6782  | 7363  | 6775  | 6811  | 3276  | 3766  | 5227  | 4429  | 4235  | 2654  | 3484  | 6460  | 4285  | 7895  | 6177  | 10109  | 6186  | 7252  | Sox9   |         |
| Sp1     | 9047  | 7184  | 7351  | 7391  | 7261  | 7755  | 8077  | 10481 | 10352 | 8365  | 9522  | 9562  | 9871  | 9720  | 8408  | 7663  | 7609  | 7287  | 7381  | 7886  | 7956  | 8478  | 9828  | 8648  | 8996  | 8572   | 10599 | 10003 | Sp1    |         |
| Sp100   | 35    | 22    | 11    | 22    | 21    | 17    | 11    | 27    | 40    | 49    | 92    | 38    | 29    | 33    | 26    | 39    | 13    | 25    | 10    | 36    | 24    | 65    | 49    | 42    | 27    | 61     | 71    | 57    | Sp100  |         |
| Sp110   | 29    | 26    | 32    | 27    | 35    | 32    | 27    | 51    | 32    | 44    | 73    | 48    | 62    | 34    | 54    | 44    | 22    | 34    | 17    | 44    | 36    | 58    | 67    | 30    | 61    | 67     | 52    | 51    | Sp110  |         |
| Sp140   | 46    | 46    | 27    | 46    | 21    | 36    | 20    | 42    | 53    | 15    | 57    | 56    | 36    | 45    | 44    | 79    | 22    | 28    | 28    | 31    | 31    | 43    | 104   | 38    | 36    | 55     | 28    | 38    | Sp140  |         |
| Sp2     | 787   | 985   | 1475  | 1081  | 977   | 838   | 808   | 1028  | 1299  | 1551  | 1374  | 1921  | 1469  | 1726  | 749   | 847   | 1424  | 987   | 1232  | 638   | 884   | 1390  | 1071  | 1748  | 1561  | 2082   | 1548  | 1634  | Sp2    |         |
| Sp3     | 8987  | 6608  | 7404  | 6939  | 7502  | 7799  | 8838  | 14084 | 11905 | 9712  | 10081 | 11904 | 10875 | 12829 | 8918  | 7258  | 7290  | 6937  | 7811  | 8599  | 8254  | 11282 | 11174 | 10918 | 11069 | 12759  | 12386 | 12716 | Sp3    |         |
| Sp4     | 5819  | 4997  | 3830  | 5363  | 5332  | 6046  | 6574  | 7339  | 5760  | 6953  | 4557  | 5681  | 4813  | 5731  | 5992  | 4687  | 4757  | 5378  | 5440  | 6602  | 6316  | 5825  | 5240  | 4712  | 5924  | 3983   | 5898  | 5268  | Sp4    |         |
| Sp5     | 497   | 521   | 903   | 573   | 443   | 566   | 363   | 289   | 278   | 282   | 228   | 450   | 348   | 379   | 426   | 368   | 552   | 482   | 689   | 495   | 495   | 292   | 328   | 423   | 362   | 419    | 407   | 485   | Sp5    |         |
| Sp6     | 152   | 110   | 133   | 93    | 78    | 98    | 68    | 100   | 98    | 86    | 62    | 133   | 67    | 86    | 53    | 98    | 125   | 86    | 84    | 61    | 67    | 60    | 37    | 136   | 65    | 41     | 62    | 49    | 82     | Sp6     |
| Sp7     | 130   | 79    | 58    | 107   | 70    | 97    | 29    | 307   | 276   | 425   | 347   | 88    | 129   | 92    | 84    | 125   | 53    | 138   | 42    | 29    | 34    | 378   | 316   | 392   | 360   | 65     | 71    | 63    | Sp7    |         |
| Sp8     | 1275  | 794   | 1360  | 1480  | 990   | 1075  | 1639  | 1542  | 1235  | 1325  | 987   | 1937  | 1378  | 2279  | 1051  | 858   | 1447  | 917   | 1413  | 906   | 1412  | 976   | 773   | 2062  | 1362  | 3055   | 1554  | 2129  | Sp8    |         |
| Sp9     | 911   | 921   | 918   | 1738  | 1422  | 1453  | 2016  | 1143  | 982   | 1474  | 1024  | 1870  | 327   | 1920  | 828   | 306   | 1583  | 1786  | 1956  | 1090  | 2036  | 1785  | 702   | 2145  | 1849  | 2227   | 1239  | 1316  | Sp9    |         |
| Spa17   | 335   | 436   | 413   | 475   | 362   | 372   | 447   | 437   | 328   | 382   | 378   | 487   | 538   | 624   | 404   | 353   | 436   | 355   | 399   | 459   | 435   | 322   | 323   | 470   | 424   | 534    | 459   | 529   | Spa17  |         |
| Spaar   | 3     | 4     | 0     | 0     | 2     | 5     | 0     | 11    | 6     | 8     | 22    | 0     | 2     | 3     | 0     | 9     | 6     | 10    | 2     | 0     | 4     | 5     | 15    | 6     | 0     | 5      | 6     | 7     | Spaar  |         |
| Spaca1  | 85    | 62    | 72    | 46    | 62    | 60    | 48    | 43    | 66    | 56    | 114   | 62    | 99    | 51    | 51    | 73    | 37    | 31    | 46    | 38    | 27    | 35    | 82    | 44    | 52    | 38     | 73    | 47    | Spaca1 |         |
| Spaca3  | 0     | 0     | 0     | 0     | 1     | 0     | 0     | 0     | 1     | 1     | 0     | 0     | 0     | 0     | 0     | 3     | 0     | 0     | 0     | 1     | 1     | 0     | 0     | 0     | 0     | 3      | 0     | 5     | 4      | Spaca3  |
| Spaca5  | 3     | 0     | 1     | 0     | 1     | 0     | 3     | 0     | 0     | 4     | 0     | 1     | 0     | 1     | 0     | 2     | 1     | 0     | 0     | 0     | 3     | 0     | 0     | 6     | 1     | 0      | 0     | 0     | 0      | Spaca5  |
| Spaca6  | 2475  | 1960  | 2318  | 2158  | 2583  | 2761  | 2368  | 7618  | 7044  | 8517  | 9444  | 9155  | 10270 | 10086 | 2203  | 2084  | 2015  | 1924  | 2258  | 2268  | 2330  | 8256  | 6434  | 7956  | 8533  | 5313   | 9783  | 9032  | Spaca6 |         |
| Spaca7  | 0     | 2     | 2     | 1     | 1     | 0     | 0     | 0     | 1     | 2     | 3     | 0     | 2     | 0     | 1     | 1     | 0     | 1     | 0     | 0     | 1     | 0     | 1     | 1     | 0     | 4      | 0     | 1     | 0      | Spaca7  |
| Spaca9  | 21    | 40    | 11    | 32    | 32    | 25    | 22    | 37    | 36    | 21    | 24    | 45    | 39    | 19    | 26    | 48    | 21    | 18    | 26    | 21    | 16    | 27    | 32    | 15    | 32    | 18     | 27    | 14    | Spaca9 |         |
| Spag1   | 1389  | 1565  | 1232  | 1570  | 1436  | 1498  | 1581  | 1430  | 1177  | 1324  | 1160  | 1143  | 1209  | 1191  | 1402  | 1410  | 1426  | 1508  | 1541  | 1528  | 1609  | 1457  | 1181  | 1261  | 1358  | 1119   | 1252  | 1104  | Spag1  |         |
| Spag11a | 0     | 0     | 0     | 0     | 0     | 0     | 0     | 0     | 0     | 0     | 0     | 0     | 0     | 0     | 0     | 0     | 0     | 0     | 0     | 1     | 0     | 0     | 0     | 0     | 0     | 0      | 0     | 0     | 0      | Spag11a |
| Spag11b | 0     | 0     | 0     | 0     | 0     | 3     | 0     | 0     | 1     | 0     | 0     | 0     | 3     | 0     | 0     | 0     | 0     | 0     | 0     | 0     | 1     | 0     | 0     | 0     | 0     | 0      | 0     | 0     | 0      | Spag11b |
| Spag16  | 226   | 190   | 263   | 149   | 175   | 189   | 173   | 177   | 164   | 124   | 128   | 238   | 296   | 212   | 223   | 235   | 165   | 118   | 146   | 182   | 171   | 179   | 174   | 122   | 184   | 127    | 200   | 179   | Spag16 |         |
| Spag17  | 80    | 68    | 27    | 42    | 92    | 75    | 40    | 85    | 147   | 90    | 80    | 80    | 125   | 54    | 80    | 123   | 24    | 36    | 45    | 48    | 44    | 90    | 211   | 60    | 41    | 26     | 56    | 63    | Spag17 |         |
| Spag4   | 573   | 650   | 797   | 733   | 828   | 666   | 645   | 375   | 410   | 423   | 439   | 533   | 468   | 446   | 510   | 537   | 808   | 701   | 884   | 704   | 717   | 485   | 365   | 471   | 486   | 586    | 501   | 492   | Spag4  |         |
| Spag5   | 9085  | 8859  | 8350  | 7529  | 5195  | 6167  | 7445  | 6826  | 6227  | 5482  | 5169  | 8922  | 7073  | 8825  | 8090  | 7393  | 7276  | 6345  | 6713  | 7193  | 6637  | 4466  | 5262  | 7074  | 6366  | 9249   | 8851  | 8641  | Spag5  |         |
| Spag6   | 18    | 25    | 34    | 13    | 7     | 24    | 8     | 23    | 6     | 19    | 17    | 16    | 18    | 18    | 28    | 13    | 16    | 10    | 8     | 13    | 11    | 3     | 6     | 6     | 19    | 8      | 15    | 21    | Spag6  |         |
| Spag6l  | 444   | 503   | 324   | 490   | 668   | 663   | 685   | 364   | 314   | 414   | 293   | 257   | 329   | 231   | 579   | 530   |       |       |       |       |       |       |       |       |       |        |       |       |        |         |



|         |       |       |       |       |       |       |       |       |       |       |       |       |       |       |       |       |       |       |       |       |       |       |       |       |       |       |       |       |
|---------|-------|-------|-------|-------|-------|-------|-------|-------|-------|-------|-------|-------|-------|-------|-------|-------|-------|-------|-------|-------|-------|-------|-------|-------|-------|-------|-------|-------|
| Spock2  | 2902  | 3528  | 4144  | 6162  | 10494 | 7325  | 6729  | 8005  | 9110  | 11742 | 10708 | 7609  | 8589  | 6714  | 3700  | 3619  | 5336  | 7483  | 8339  | 6419  | 7973  | 14567 | 8569  | 8759  | 12482 | 5469  | 6458  | 6427  |
| Spock3  | 1275  | 994   | 912   | 1360  | 2167  | 1888  | 1333  | 2654  | 2274  | 1846  | 2385  | 1316  | 1970  | 1447  | 1925  | 1547  | 1050  | 1684  | 1372  | 1731  | 1481  | 3068  | 2760  | 1251  | 2061  | 931   | 1249  | 1310  |
| Spon1   | 3160  | 5179  | 4499  | 3832  | 5974  | 4292  | 2718  | 6843  | 5919  | 5926  | 5924  | 3666  | 9000  | 3076  | 7474  | 7064  | 4642  | 4165  | 3223  | 3716  | 3006  | 7147  | 5391  | 2915  | 4273  | 2435  | 4780  | 3542  |
| Spon2   | 48    | 104   | 66    | 54    | 74    | 100   | 49    | 131   | 199   | 125   | 216   | 135   | 139   | 122   | 61    | 76    | 52    | 80    | 58    | 42    | 63    | 139   | 315   | 155   | 138   | 135   | 158   | 131   |
| Spop    | 9596  | 9411  | 13811 | 11814 | 11131 | 10020 | 11448 | 8636  | 7978  | 9744  | 8699  | 10085 | 9539  | 10338 | 9792  | 9800  | 13236 | 11348 | 11130 | 10517 | 10701 | 9678  | 8403  | 10156 | 10051 | 10975 | 10258 | 10452 |
| Spopfm3 | 0     | 0     | 0     | 0     | 0     | 0     | 0     | 0     | 0     | 0     | 0     | 0     | 0     | 0     | 0     | 0     | 0     | 0     | 0     | 0     | 0     | 0     | 0     | 1     | 0     | 0     | 0     | 0     |
| Spopl   | 1970  | 1484  | 1905  | 2182  | 2312  | 2425  | 2591  | 2866  | 2548  | 2618  | 3072  | 3067  | 3234  | 3185  | 1923  | 1987  | 1947  | 2046  | 2159  | 2208  | 2284  | 2976  | 2695  | 2711  | 2928  | 2382  | 2823  | 3163  |
| Spout1  | 3245  | 4059  | 4683  | 4769  | 3465  | 3576  | 3351  | 2097  | 2736  | 3181  | 2928  | 2959  | 2994  | 2822  | 3086  | 3738  | 4475  | 3998  | 4168  | 3392  | 3529  | 2321  | 2745  | 3163  | 2830  | 3842  | 3018  | 3026  |
| Spp1    | 331   | 317   | 212   | 207   | 155   | 219   | 102   | 122   | 288   | 153   | 255   | 113   | 314   | 146   | 446   | 438   | 169   | 219   | 142   | 106   | 117   | 328   | 403   | 137   | 177   | 79    | 152   | 150   |
| Spp2    | 1     | 2     | 0     | 0     | 6     | 3     | 1     | 2     | 14    | 2     | 0     | 3     | 1     | 4     | 0     | 3     | 0     | 2     | 3     | 3     | 4     | 3     | 9     | 2     | 8     | 1     | 2     | 2     |
| Sppl2a  | 5206  | 3845  | 4051  | 4146  | 4165  | 4589  | 4712  | 7598  | 6809  | 5917  | 6380  | 6364  | 6398  | 6849  | 5036  | 4432  | 3940  | 4377  | 4347  | 5150  | 4455  | 6403  | 6965  | 6378  | 6592  | 5987  | 6746  | 6724  |
| Sppl2b  | 3092  | 4377  | 3831  | 4030  | 3619  | 3422  | 3067  | 2152  | 2779  | 2667  | 2809  | 2613  | 2552  | 2132  | 2995  | 3812  | 3834  | 3661  | 3746  | 3273  | 3006  | 2642  | 2718  | 2638  | 2724  | 2773  | 2307  | 2279  |
| Sppl2c  | 0     | 0     | 0     | 0     | 0     | 0     | 0     | 0     | 1     | 0     | 0     | 0     | 2     | 0     | 0     | 1     | 0     | 0     | 0     | 2     | 2     | 2     | 0     | 0     | 0     | 0     | 0     | 0     |
| Sppl3   | 4295  | 4366  | 5159  | 5017  | 5093  | 4568  | 4757  | 5013  | 5197  | 5362  | 5555  | 5887  | 5350  | 5443  | 3767  | 4396  | 5029  | 5016  | 5026  | 3985  | 4664  | 5989  | 5095  | 5727  | 5760  | 6312  | 5285  | 5633  |
| Spr     | 890   | 997   | 1299  | 822   | 818   | 953   | 811   | 1094  | 1326  | 1099  | 1155  | 1338  | 1436  | 1196  | 815   | 917   | 958   | 842   | 958   | 1004  | 783   | 866   | 1327  | 1289  | 1247  | 1866  | 1505  | 1443  |
| Spred1  | 8691  | 5608  | 7367  | 7576  | 7670  | 7747  | 7965  | 9408  | 8763  | 8117  | 9001  | 8687  | 8962  | 8718  | 7713  | 7466  | 7435  | 7878  | 7279  | 6764  | 7543  | 8863  | 8375  | 8336  | 8589  | 8602  | 8488  | 8799  |
| Spred2  | 2030  | 1688  | 2579  | 2402  | 2676  | 2211  | 2345  | 2047  | 2580  | 2710  | 2861  | 2837  | 2388  | 2903  | 1792  | 1855  | 2343  | 2156  | 2530  | 1741  | 2314  | 2689  | 2256  | 2857  | 2577  | 3429  | 2293  | 2730  |
| Spred3  | 3142  | 2820  | 3005  | 3717  | 3881  | 3457  | 3504  | 3446  | 3294  | 3952  | 3619  | 3698  | 3531  | 3858  | 2686  | 2718  | 3570  | 3423  | 3599  | 3073  | 3646  | 4455  | 2998  | 3805  | 4237  | 3577  | 2612  | 3368  |
| Spring1 | 5580  | 6043  | 5276  | 6961  | 6485  | 6121  | 5955  | 3219  | 3289  | 3507  | 3425  | 3675  | 3333  | 3297  | 5629  | 5527  | 5926  | 6722  | 6652  | 6305  | 6462  | 3325  | 3042  | 3577  | 3876  | 3103  | 3245  | 3241  |
| Sprn    | 90    | 116   | 76    | 96    | 322   | 196   | 168   | 547   | 611   | 591   | 488   | 310   | 341   | 310   | 133   | 87    | 104   | 144   | 156   | 167   | 190   | 744   | 575   | 424   | 487   | 263   | 308   | 214   |
| Sprr1a  | 2     | 1     | 0     | 0     | 0     | 0     | 0     | 27    | 34    | 34    | 3     | 0     | 0     | 0     | 0     | 0     | 0     | 0     | 0     | 1     | 0     | 0     | 29    | 9     | 0     | 0     | 0     | 0     |
| Sprr1b  | 0     | 0     | 0     | 0     | 0     | 0     | 0     | 2     | 2     | 0     | 0     | 0     | 0     | 0     | 0     | 0     | 0     | 0     | 0     | 0     | 0     | 0     | 5     | 0     | 0     | 0     | 0     | 0     |
| Sprr2a1 | 0     | 0     | 0     | 0     | 0     | 0     | 0     | 0     | 0     | 0     | 1     | 0     | 0     | 0     | 0     | 0     | 0     | 0     | 0     | 0     | 0     | 0     | 1     | 2     | 0     | 0     | 0     | 0     |
| Sprr2a3 | 0     | 0     | 0     | 0     | 0     | 0     | 0     | 0     | 0     | 0     | 0     | 0     | 0     | 0     | 0     | 0     | 0     | 0     | 0     | 0     | 0     | 0     | 3     | 0     | 0     | 0     | 0     | 0     |
| Sprr2b  | 0     | 1     | 5     | 0     | 0     | 0     | 0     | 0     | 2     | 0     | 0     | 0     | 10    | 0     | 0     | 2     | 0     | 0     | 0     | 0     | 0     | 0     | 1     | 0     | 0     | 0     | 0     | 0     |
| Sprr2f  | 0     | 0     | 0     | 0     | 0     | 0     | 0     | 0     | 1     | 0     | 0     | 0     | 0     | 0     | 0     | 0     | 0     | 0     | 0     | 0     | 0     | 0     | 0     | 0     | 0     | 0     | 0     | 0     |
| Sprr2h  | 0     | 0     | 0     | 0     | 0     | 0     | 0     | 0     | 0     | 0     | 0     | 0     | 0     | 0     | 0     | 0     | 0     | 0     | 0     | 0     | 0     | 0     | 0     | 0     | 0     | 0     | 0     | 0     |
| Sprr2k  | 0     | 0     | 0     | 0     | 0     | 0     | 0     | 0     | 0     | 0     | 0     | 0     | 0     | 0     | 0     | 0     | 0     | 0     | 0     | 0     | 0     | 0     | 1     | 0     | 0     | 0     | 0     | 0     |
| Sprr3   | 0     | 0     | 0     | 0     | 0     | 0     | 0     | 0     | 0     | 5     | 0     | 0     | 0     | 0     | 0     | 0     | 0     | 0     | 0     | 0     | 0     | 0     | 1     | 0     | 0     | 0     | 0     | 0     |
| Sprr4   | 0     | 0     | 0     | 0     | 0     | 0     | 0     | 0     | 1     | 0     | 0     | 0     | 0     | 0     | 0     | 0     | 0     | 0     | 0     | 0     | 0     | 0     | 0     | 0     | 0     | 0     | 0     | 0     |
| Sprtn   | 3926  | 4173  | 4475  | 4618  | 3593  | 3911  | 3764  | 2811  | 2812  | 2933  | 3017  | 3272  | 3138  | 3239  | 3700  | 4012  | 4305  | 4479  | 3884  | 3294  | 3978  | 3150  | 2762  | 3057  | 3366  | 3214  | 3391  | 3379  |
| Spry1   | 1069  | 948   | 1358  | 1047  | 992   | 860   | 907   | 1154  | 1311  | 1163  | 1390  | 1754  | 1574  | 1600  | 820   | 905   | 1172  | 906   | 1054  | 821   | 872   | 1099  | 1223  | 1457  | 1115  | 2109  | 1427  | 1683  |
| Spry2   | 1053  | 1020  | 1436  | 1267  | 1368  | 1130  | 1006  | 1239  | 1196  | 1135  | 2048  | 1219  | 1415  | 1211  | 972   | 1043  | 1334  | 1147  | 1240  | 926   | 1020  | 1521  | 1505  | 1319  | 1225  | 1427  | 1130  | 1169  |
| Spry4   | 649   | 446   | 459   | 461   | 517   | 387   | 353   | 462   | 538   | 611   | 916   | 340   | 439   | 359   | 392   | 571   | 452   | 436   | 390   | 291   | 363   | 588   | 646   | 480   | 409   | 541   | 322   | 329   |
| Spryd3  | 1220  | 1411  | 1632  | 1969  | 2351  | 2066  | 1667  | 1544  | 1930  | 2228  | 2228  | 1647  | 1826  | 1469  | 1258  | 1492  | 1938  | 2088  | 2180  | 1870  | 1834  | 2181  | 2136  | 1869  | 2276  | 1732  | 1626  | 1518  |
| Spryd4  | 1035  | 1114  | 929   | 836   | 785   | 758   | 700   | 747   | 819   | 731   | 737   | 792   | 836   | 726   | 945   | 1064  | 844   | 807   | 705   | 845   | 709   | 637   | 849   | 686   | 734   | 945   | 888   | 794   |
| Spryd7  | 1991  | 1553  | 1632  | 1983  | 2274  | 1876  | 2562  | 1749  | 1469  | 1395  | 1391  | 1260  | 1105  | 1377  | 2392  | 1726  | 1885  | 2210  | 2097  | 2682  | 2389  | 1778  | 1515  | 1362  | 1548  | 1288  | 1316  | 1269  |
| Spsb1   | 837   | 1002  | 727   | 660   | 692   | 634   | 560   | 470   | 548   | 506   | 738   | 464   | 717   | 441   | 791   | 1114  | 882   | 737   | 677   | 636   | 547   | 496   | 614   | 501   | 414   | 658   | 579   | 555   |
| Spsb2   | 397   | 588   | 603   | 658   | 525   | 468   | 387   | 136   | 220   | 168   | 247   | 227   | 222   | 205   | 485   | 505   | 633   | 587   | 516   | 528   | 443   | 184   | 260   | 226   | 205   | 229   | 217   | 212   |
| Spsb3   | 2241  | 2931  | 2498  | 2986  | 2491  | 2685  | 2318  | 1748  | 2141  | 2023  | 1801  | 1990  | 1919  | 1862  | 2197  | 2565  | 2497  | 2818  | 2872  | 2420  | 2455  | 1937  | 2049  | 1970  | 2091  | 2260  | 2023  | 1778  |
| Spsb4   | 1401  | 1707  | 2413  | 1529  | 1413  | 1533  | 1252  | 1867  | 1811  | 2054  | 1787  | 3293  | 3046  | 3017  | 1557  | 1438  | 2052  | 1161  | 1643  | 1410  | 1298  | 2214  | 1566  | 2272  | 2380  | 3330  | 3541  | 3501  |
| Spta1   | 323   | 416   | 391   | 124   | 55    | 127   | 133   | 208   | 238   | 150   | 142   | 371   | 1082  | 613   | 406   | 539   | 198   | 100   | 115   | 192   | 83    | 110   | 270   | 105   | 128   | 310   | 528   | 1239  |
| Sptan1  | 72472 | 86660 | 44349 | 75196 | 87123 | 86731 | 87900 | 71836 | 72120 | 66091 | 64168 | 55362 | 55318 | 56395 | 80665 | 73364 | 57515 | 81081 | 80734 | 87628 | 98257 | 63634 | 67966 | 52487 | 73828 | 30693 | 55035 | 49623 |
| Sptb    | 1015  | 1504  | 1561  | 1138  | 2280  | 1298  | 1150  | 513   | 1090  | 1264  | 1254  | 811   | 1894  | 1159  | 1108  | 1657  | 1359  | 1395  | 1541  | 1133  | 1373  | 1414  | 1419  | 1097  | 584   | 1031  | 2346  |       |
| Sptbn1  | 33299 | 33777 | 25791 | 31168 | 40168 | 38419 | 33339 | 39782 | 42243 | 41167 | 46752 | 34387 | 38425 | 34125 | 34502 | 35367 | 28240 | 35315 | 32083 | 33181 | 36560 | 42509 | 43019 | 31663 | 42418 | 20450 | 35895 | 30807 |
| Sptbn2  | 5201  | 6931  | 7963  | 10566 | 14942 | 12408 | 10151 | 13431 | 15783 | 20463 | 16068 | 19728 | 16887 | 17495 | 6444  | 5923  | 10608 | 10439 | 14024 | 9578  | 12236 | 20986 | 13198 | 18065 | 23413 | 10499 | 15416 | 16822 |
| Sptbn4  | 920   | 1376  | 1420  | 2601  | 3637  | 2496  | 2495  | 1000  | 1309  | 1892  | 1555  | 828   | 771   | 744   | 1151  | 1168  | 2057  | 3168  | 3049  | 2001  | 2712  | 2002  | 1052  | 1267  | 1768  | 440   | 551   | 545   |
| Sptbn5  | 99    | 92    | 106   | 111   | 122   | 96    | 91    | 54    | 74    | 56    | 81    | 70    | 71    | 116   | 76    | 87    | 125   | 79    | 94    | 83    | 83    | 91    | 55    | 74    | 45    | 75    | 99    | 76    |
| Sptlc1  | 4513  | 3886  | 3769  | 3569  | 2673  | 3045  | 2958  | 3147  | 2785  | 2895  | 2770  | 2847  | 2935  | 2846  | 4065  | 4159  | 3167  | 3280  | 2745  | 3674  | 2913  | 2548  | 2972  | 2743  | 2743  | 2884  | 2923  | 2841  |
| Sptlc2  | 12716 | 11496 | 9293  | 9903  | 9895  | 10961 | 10760 | 6259  | 5558  | 5104  | 5281  | 5194  | 5474  | 5393  | 12765 | 12289 | 9243  | 10618 | 8765  | 11115 | 10435 | 6124  | 5443  | 4500  | 5438  | 6163  | 5022  | 4939  |
| Sptlc3  | 22    | 3     | 3     | 0     | 1     | 2     | 1     | 44    | 47    | 25    | 12    | 11    | 5     | 9     | 18    | 9     | 1     | 0     | 4     | 1     | 0     | 7     | 48    | 13    | 8     | 24    | 6     | 5     |
| Sptssa  | 3430  | 2760  | 3589  | 2962  | 2921  | 2776  | 3467  | 3612  | 3010  | 2800  | 2742  | 2937  | 2892  | 3629  | 3562  | 3001  | 3381  | 2846  | 2886  | 3562  | 3313  | 2854  | 3043  |       |       |       |       |       |



|        |       |       |       |       |       |       |       |       |       |       |       |       |       |       |       |       |       |       |       |       |       |       |       |       |       |       |       |       |        |
|--------|-------|-------|-------|-------|-------|-------|-------|-------|-------|-------|-------|-------|-------|-------|-------|-------|-------|-------|-------|-------|-------|-------|-------|-------|-------|-------|-------|-------|--------|
| Srm    | 2158  | 2883  | 2607  | 2441  | 2114  | 2046  | 2034  | 2102  | 2718  | 2368  | 2752  | 2531  | 2261  | 2370  | 2152  | 2481  | 2525  | 2315  | 2243  | 1980  | 2195  | 2326  | 2653  | 2650  | 2556  | 3246  | 2556  | 2480  | Srm    |
| Srms   | 10    | 20    | 16    | 26    | 20    | 21    | 10    | 4     | 11    | 10    | 13    | 7     | 20    | 14    | 8     | 12    | 10    | 24    | 18    | 5     | 13    | 17    | 14    | 4     | 11    | 4     | 13    | 8     | Srms   |
| Srp14  | 4941  | 5717  | 5407  | 5953  | 5133  | 4679  | 5747  | 4805  | 4402  | 4394  | 4127  | 4595  | 4427  | 4965  | 5563  | 5041  | 5381  | 5239  | 5275  | 6199  | 5706  | 3898  | 4469  | 4555  | 4628  | 4795  | 4527  | 4747  | Srp14  |
| Srp19  | 3199  | 2582  | 2988  | 2869  | 2386  | 2256  | 2929  | 3096  | 2673  | 2672  | 2824  | 2916  | 2971  | 3493  | 3033  | 2678  | 2948  | 2507  | 2568  | 2720  | 2702  | 2779  | 2879  | 3221  | 2665  | 3251  | 2874  | 3430  | Srp19  |
| Srp54a | 315   | 392   | 456   | 379   | 245   | 181   | 375   | 366   | 281   | 347   | 138   | 360   | 314   | 328   | 288   | 198   | 492   | 271   | 119   | 246   | 214   | 251   | 293   | 458   | 366   | 364   | 295   | 453   | Srp54a |
| Srp54b | 510   | 315   | 401   | 219   | 295   | 343   | 310   | 530   | 312   | 217   | 220   | 294   | 243   | 441   | 493   | 308   | 548   | 503   | 330   | 340   | 283   | 463   | 239   | 236   | 330   | 317   | 336   | 349   | Srp54b |
| Srp54c | 1791  | 1253  | 1362  | 1307  | 1277  | 1288  | 1458  | 1631  | 1486  | 1313  | 1585  | 1434  | 1210  | 1518  | 1957  | 1581  | 1516  | 1557  | 1323  | 1655  | 1146  | 1765  | 1540  | 1347  | 1391  | 1426  | 1386  | 1272  | Srp54c |
| Srp68  | 6053  | 7051  | 6492  | 5723  | 5101  | 5555  | 5203  | 5954  | 6632  | 6463  | 6626  | 6857  | 6753  | 6613  | 5854  | 6256  | 6050  | 5569  | 5679  | 5293  | 5097  | 5661  | 6669  | 6950  | 6458  | 7972  | 7304  | 6844  | Srp68  |
| Srp72  | 14893 | 13807 | 12744 | 12137 | 11838 | 12209 | 13116 | 13411 | 12724 | 12325 | 12093 | 11574 | 12187 | 12092 | 14711 | 12934 | 11973 | 12485 | 12080 | 12682 | 13117 | 12148 | 12803 | 12031 | 12206 | 12473 | 12342 | 12723 | Srp72  |
| Srp9   | 4778  | 4299  | 4493  | 4357  | 3612  | 4468  |       | 4279  | 3851  | 3312  | 3491  | 3671  | 3655  | 4176  | 5056  | 4202  | 4472  | 3916  | 3960  | 4587  | 4233  | 3437  | 3988  | 3818  | 3640  | 4316  | 3834  | 4297  | Srp9   |
| SrpK1  | 11704 | 11931 | 12044 | 12355 | 12080 | 11357 | 12699 | 12073 | 10971 | 11227 | 10439 | 13039 | 12107 | 13552 | 11512 | 11080 | 11991 | 11955 | 12931 | 12313 | 12518 | 11416 | 10125 | 12055 | 12088 | 12538 | 13054 | 13200 | SrpK1  |
| SrpK2  | 13779 | 11489 | 12986 | 14062 | 16643 | 15242 | 17926 | 13432 | 11762 | 12627 | 12387 | 12339 | 11578 | 13461 | 14388 | 12242 | 14484 | 15172 | 15647 | 15184 | 17531 | 14018 | 11914 | 12490 | 13651 | 10939 | 12311 | 12741 | SrpK2  |
| SrpK3  | 13    | 7     | 8     | 0     | 20    | 13    | 2     | 40    | 78    | 13    | 491   | 3     | 24    | 4     | 16    | 18    | 0     | 7     | 0     | 2     | 3     | 75    | 314   | 12    | 15    | 12    | 2     | 8     | SrpK3  |
| Srpr   | 6211  | 6163  | 6118  | 5206  | 4268  | 4722  | 4456  | 5757  | 6081  | 5651  | 6754  | 5763  | 6212  | 5519  | 6173  | 5226  | 4870  | 4486  | 4413  | 4427  | 5763  | 6581  | 5534  | 5325  | 6317  | 6342  | 6092  |       | Srpr   |
| Srprb  | 4809  | 5850  | 5321  | 5065  | 4665  | 4877  | 4539  | 3635  | 4097  | 3881  | 4170  | 3936  | 4082  | 3800  | 4701  | 5254  | 5381  | 5335  | 5199  | 4599  | 4816  | 3908  | 4168  | 4069  | 3964  | 4637  | 4283  | 4290  | Srprb  |
| Srpx   | 343   | 356   | 305   | 334   | 166   | 404   | 166   | 568   | 925   | 673   | 878   | 387   | 617   | 440   | 386   | 389   | 327   | 441   | 158   | 158   | 161   | 603   | 1010  | 608   | 540   | 455   | 430   | 407   | Srpx   |
| Srpx2  | 98    | 75    | 126   | 43    | 62    | 80    | 53    | 85    | 96    | 96    | 172   | 93    | 127   | 101   | 108   | 125   | 70    | 77    | 39    | 75    | 60    | 62    | 177   | 77    | 115   | 79    | 84    | 100   | Srpx2  |
| Srr    | 5622  | 5503  | 3930  | 5315  | 5479  | 5835  | 5801  | 4252  | 4246  | 3788  | 3838  | 3644  | 3303  | 3343  | 6010  | 4854  | 4862  | 5470  | 5280  | 6053  | 5869  | 4488  | 4194  | 3268  | 3952  | 2767  | 3446  | 3129  | Srr    |
| Srrd   | 899   | 1070  | 1073  | 1033  | 849   | 791   | 875   | 629   | 729   | 711   | 767   | 1021  | 787   | 941   | 779   | 1014  | 1075  | 902   | 982   | 706   | 972   | 745   | 763   | 953   | 769   | 990   | 798   | 860   | Srrd   |
| Srrm1  | 18521 | 16260 | 20772 | 20383 | 19895 | 19916 | 18704 | 17702 | 18771 | 21284 | 22460 | 23750 | 21643 | 22713 | 17023 | 17522 | 20683 | 19775 | 20455 | 16459 | 19085 | 21631 | 17516 | 22107 | 21597 | 22987 | 21291 | 21600 | Srrm1  |
| Srrm2  | 65227 | 70315 | 56736 | 80342 | 86051 | 83648 | 83230 | 78704 | 78293 | 92129 | 83070 | 99914 | 90679 | 92769 | 63241 | 65236 | 73268 | 82812 | 86547 | 70884 | 86071 | 98012 | 70910 | 85485 | 95617 | 48495 | 92625 | 86783 | Srrm2  |
| Srrm3  | 1350  | 2162  | 2554  | 3030  | 4066  | 3017  | 2919  | 2633  | 2383  | 3883  | 3155  | 3479  | 3483  | 3407  | 1851  | 1474  | 3234  | 3341  | 3794  | 2661  | 3863  | 4700  | 2350  | 3384  | 4801  | 1967  | 3238  | 3186  | Srrm3  |
| Srrm4  | 3674  | 4688  | 5953  | 7963  | 10582 | 8584  | 9096  | 6530  | 6565  | 8756  | 6946  | 10272 | 7595  | 9648  | 4751  | 4055  | 7701  | 8460  | 9729  | 6843  | 9601  | 10639 | 5520  | 9655  | 10631 | 6811  | 7704  | 8959  | Srrm4  |
| Srrt   | 11505 | 13352 | 17002 | 15137 | 13476 | 13220 | 13961 | 12698 | 14346 | 16948 | 15753 | 19625 | 16771 | 19591 | 10512 | 11921 | 16143 | 13620 | 15252 | 11892 | 13766 | 14781 | 12943 | 19614 | 17378 | 21505 | 17920 | 19673 | Srrt   |
| Srsf1  | 1925  | 1089  | 1487  | 1238  | 1064  | 1379  | 1045  | 2447  | 1711  | 1356  | 1465  | 1957  | 1761  | 1838  | 1869  | 1315  | 1267  | 1108  | 1446  | 1424  | 1067  | 2151  | 1393  | 1669  | 1781  | 1902  | 1943  | 1756  | Srsf1  |
| Srsf10 | 27413 | 18939 | 28818 | 26487 | 24164 | 24544 | 28547 | 30884 | 23690 | 24117 | 25015 | 28758 | 27481 | 32107 | 27170 | 23241 | 25902 | 25632 | 25955 | 28505 | 26002 | 25011 | 22557 | 28398 | 27793 | 31323 | 30351 | 31468 | Srsf10 |
| Srsf11 | 34538 | 28055 | 28214 | 30316 | 28769 | 31390 | 33275 | 31382 | 27928 | 28756 | 30925 | 30499 | 29877 | 31481 | 36766 | 29321 | 28246 | 29719 | 29725 | 31162 | 31251 | 30393 | 27082 | 30687 | 29954 | 27871 | 30204 | 30674 | Srsf11 |
| Srsf12 | 839   | 757   | 1099  | 1080  | 1514  | 1268  | 1263  | 1225  | 1243  | 1502  | 1371  | 882   | 993   | 991   | 982   | 943   | 1139  | 1246  | 1223  | 1170  | 1230  | 1656  | 1272  | 1114  | 1481  | 697   | 793   | 915   | Srsf12 |
| Srsf2  | 30428 | 25701 | 30739 | 29288 | 25873 | 25344 | 31687 | 28355 | 25857 | 27759 | 27463 | 34206 | 30758 | 36961 | 29376 | 25709 | 29501 | 27436 | 27198 | 25698 | 29408 | 28289 | 24840 | 32683 | 29663 | 40248 | 32722 | 38352 | Srsf2  |
| Srsf3  | 45548 | 37719 | 45972 | 41806 | 35304 | 36951 | 41642 | 57268 | 49767 | 47657 | 46001 | 56870 | 53518 | 58426 | 46649 | 42563 | 42490 | 38874 | 39937 | 47334 | 37694 | 45308 | 46768 | 53749 | 49534 | 65827 | 59420 | 59267 | Srsf3  |
| Srsf4  | 5343  | 6093  | 7047  | 6166  | 6544  | 6037  | 6192  | 6705  | 4746  | 8732  | 7755  | 10525 | 10667 | 5042  | 5074  | 7262  | 6315  | 7356  | 5620  | 6509  | 7551  | 6620  | 9785  | 8780  | 11652 | 9103  | 9463  |       | Srsf4  |
| Srsf5  | 29103 | 26042 | 37566 | 33283 | 29720 | 28439 | 31161 | 39438 | 33395 | 36569 | 39208 | 41592 | 40580 | 44915 | 30241 | 26664 | 33378 | 30681 | 31179 | 33801 | 29662 | 36330 | 33479 | 42904 | 39944 | 47391 | 43776 | 43518 | Srsf5  |
| Srsf6  | 22945 | 17431 | 25726 | 22148 | 22189 | 23322 | 23752 | 45143 | 39218 | 42692 | 43014 | 50703 | 47035 | 51955 | 21402 | 17900 | 23779 | 20251 | 24908 | 21581 | 23290 | 46486 | 37971 | 47625 | 46373 | 51702 | 53128 |       | Srsf6  |
| Srsf7  | 21659 | 18135 | 22186 | 20706 | 19041 | 19325 | 22481 | 34397 | 28702 | 27977 | 27022 | 32136 | 29120 | 33029 | 21593 | 18914 | 21598 | 19553 | 21655 | 24315 | 21177 | 26964 | 27544 | 31814 | 29179 | 36612 | 32669 | 34458 | Srsf7  |
| Srsf9  | 4077  | 4460  | 6213  | 5392  | 4725  | 4166  | 4527  | 2851  | 3040  | 3631  | 3793  | 4371  | 3915  | 4059  | 3676  | 4072  | 5988  | 5010  | 4861  | 4150  | 4718  | 2839  | 3058  | 4511  | 3870  | 5195  | 4348  | 4542  | Srsf9  |
| Srxn1  | 1698  | 1957  | 2097  | 1578  | 1600  | 1438  | 1500  | 904   | 901   | 805   | 888   | 936   | 995   | 914   | 1973  | 1725  | 1961  | 1503  | 1607  | 1408  | 1415  | 973   | 862   | 838   | 879   | 1147  | 1035  | 1067  | Srxn1  |
| Sx18   | 9535  | 9103  | 9535  | 8845  | 7837  | 8135  | 8233  | 7519  | 7266  | 6653  | 7479  | 7061  | 7668  | 7274  | 9700  | 10033 | 8809  | 8632  | 7920  | 8766  | 7853  | 6609  | 7431  | 7147  | 6735  | 8047  | 7071  | 7568  | Sx18   |
| Sx18l1 | 4012  | 4296  | 3807  | 6191  | 6931  | 6381  | 6220  | 5746  | 5299  | 6147  | 5095  | 5484  | 4603  | 5240  | 4478  | 3881  | 5040  | 6840  | 6457  | 6006  | 6598  | 8081  | 4948  | 6030  | 7271  | 4432  | 4860  | 4736  | Sx18l1 |
| Sx18l2 | 1555  | 1526  | 1415  | 1771  | 1308  | 1347  | 1848  | 1109  | 886   | 1064  | 1052  | 901   | 950   | 1199  | 1751  | 1319  | 1605  | 1482  | 1340  | 1658  | 1740  | 1021  | 926   | 1088  | 1018  | 935   | 931   | 1047  | Sx18l2 |
| Ssb    | 30993 | 24390 | 33784 | 28749 | 24971 | 26298 | 30961 | 26843 | 21864 | 22490 | 21448 | 26999 | 24900 | 29527 | 34309 | 28243 | 30525 | 26290 | 27115 | 33468 | 28323 | 23039 | 22162 | 26118 | 23726 | 31380 | 28143 | 30835 | Ssb    |
| Ssbp1  | 3952  | 3531  | 3957  | 3766  | 3198  | 3600  | 4130  | 4754  | 3812  | 3926  | 3805  | 4992  | 4609  | 5064  | 4146  | 3444  | 3902  | 3360  | 3646  | 4369  | 3594  | 3534  | 3861  | 4762  | 4172  | 5320  | 5244  | 5389  | Ssbp1  |
| Ssbp2  | 9931  | 9868  | 7384  | 10037 | 10106 | 10336 | 11732 | 7460  | 7287  | 6612  | 6147  | 6283  | 5725  | 6643  | 10439 | 8506  | 9156  | 9881  | 10695 | 11962 | 11299 | 6647  | 6853  | 6472  | 6475  | 6068  | 6209  | 6508  | Ssbp2  |
| Ssbp3  | 18692 | 21199 | 26215 | 26876 | 25444 | 22898 | 22952 | 18371 | 19343 | 25360 | 22450 | 25628 | 24057 | 26066 | 18977 | 20108 | 28439 | 25974 | 26684 | 19636 | 24897 | 24179 | 18848 | 26720 | 25843 | 27345 | 24145 | 25481 | Ssbp3  |
| Ssbp4  | 2909  | 4095  | 3031  | 3838  | 3505  | 3236  | 2721  | 2201  | 2437  | 2416  | 2231  | 2380  | 2391  | 2023  | 2879  | 3348  | 3644  | 3531  | 3697  | 3164  | 2769  | 2669  | 2354  | 2317  | 2292  | 2611  | 2177  | 1883  | Ssbp4  |
| Ssc4d  | 113   | 106   | 80    | 64    | 53    | 78    | 27    | 123   | 190   | 172   | 167   | 70    | 103   | 94    | 113   | 171   | 48    | 64    | 21    | 33    | 33    | 135   | 164   | 150   | 82    | 199   | 83    | 97    | Ssc4d  |
| S      |       |       |       |       |       |       |       |       |       |       |       |       |       |       |       |       |       |       |       |       |       |       |       |       |       |       |       |       |        |



|        |       |       |       |       |       |       |       |       |       |       |       |       |       |       |       |       |       |       |       |       |       |       |       |       |       |       |       |       |        |       |
|--------|-------|-------|-------|-------|-------|-------|-------|-------|-------|-------|-------|-------|-------|-------|-------|-------|-------|-------|-------|-------|-------|-------|-------|-------|-------|-------|-------|-------|--------|-------|
| Stk32a | 255   | 170   | 208   | 252   | 229   | 177   | 184   | 324   | 275   | 381   | 439   | 215   | 172   | 170   | 218   | 208   | 187   | 182   | 187   | 211   | 190   | 267   | 344   | 374   | 202   | 284   | 198   | 199   | Stk32a |       |
| Stk32b | 1240  | 1145  | 952   | 1745  | 2676  | 2322  | 2213  | 2387  | 2859  | 3043  | 2612  | 1950  | 1844  | 1876  | 1262  | 1144  | 1428  | 2196  | 2327  | 2067  | 2596  | 3537  | 2473  | 2437  | 3034  | 1380  | 1518  | 1615  | Stk32b |       |
| Stk32c | 28    | 173   | 39    | 65    | 451   | 262   | 27    | 171   | 30    | 348   | 61    | 26    | 48    | 144   | 26    | 84    | 35    | 213   | 108   | 107   | 31    | 38    | 28    | 63    | 366   | 16    | 86    | 14    | Stk32c |       |
| Stk33  | 584   | 614   | 840   | 490   | 483   | 568   | 506   | 699   | 517   | 616   | 484   | 937   | 779   | 949   | 666   | 523   | 689   | 457   | 600   | 555   | 535   | 682   | 522   | 705   | 653   | 682   | 1181  | 1044  | Stk33  |       |
| Stk35  | 2791  | 2597  | 3218  | 3083  | 2995  | 2758  | 3006  | 2876  | 3179  | 3117  | 3354  | 4058  | 3393  | 3781  | 2378  | 2494  | 3246  | 2860  | 3102  | 2381  | 3063  | 3285  | 2977  | 3742  | 3544  | 4037  | 3625  | 3961  | Stk35  |       |
| Stk36  | 2749  | 3472  | 3020  | 3228  | 3335  | 2926  | 3358  | 2650  | 2675  | 2847  | 2539  | 3009  | 2791  | 2797  | 2732  | 3079  | 3490  | 3214  | 3458  | 3025  | 3267  | 2976  | 2646  | 2780  | 3124  | 2551  | 2932  | 2887  | Stk36  |       |
| Stk38  | 15326 | 14195 | 15018 | 15215 | 14604 | 15020 | 16108 | 11054 | 10257 | 11390 | 10947 | 13002 | 11922 | 13028 | 15054 | 14029 | 15223 | 14681 | 14855 | 13849 | 15309 | 11774 | 10023 | 11718 | 12425 | 12163 | 12731 | 12955 | Stk38  |       |
| Stk38l | 3992  | 3664  | 3762  | 3710  | 2928  | 3234  | 3260  | 2065  | 1788  | 1583  | 1776  | 1777  | 1941  | 1716  | 4187  | 3788  | 3351  | 3516  | 2946  | 3578  | 3097  | 1654  | 1861  | 1567  | 1687  | 1824  | 1755  | 1841  | Stk38l |       |
| Stk39  | 4842  | 4614  | 5673  | 4467  | 4909  | 4767  | 4662  | 5539  | 5308  | 5077  | 4927  | 6146  | 6643  | 6263  | 5182  | 4721  | 5032  | 4381  | 4597  | 4388  | 4331  | 5750  | 5143  | 5033  | 5136  | 6255  | 6199  | 6487  | Stk39  |       |
| Stk4   | 11929 | 11474 | 9352  | 10066 | 8693  | 9563  | 10156 | 7238  | 6306  | 6165  | 5775  | 7290  | 6480  | 7118  | 11639 | 10168 | 9778  | 9859  | 9277  | 10417 | 10196 | 6385  | 6008  | 6612  | 7017  | 6353  | 7241  | 7390  | Stk4   |       |
| Stk40  | 6316  | 8155  | 8053  | 7347  | 5929  | 5949  | 5515  | 3251  | 3700  | 3858  | 4002  | 4288  | 4179  | 4081  | 6005  | 7615  | 7743  | 6848  | 6361  | 5422  | 5936  | 3673  | 3638  | 4199  | 3805  | 4468  | 3685  | 4307  | Stk40  |       |
| Stkld1 | 3     | 5     | 1     | 7     | 8     | 10    | 11    | 13    | 12    | 15    | 23    | 29    | 14    | 11    | 9     | 8     | 2     | 11    | 5     | 9     | 11    | 17    | 19    | 16    | 16    | 17    | 28    | 8     | Stkld1 |       |
| Stmn1  | 51365 | 54771 | 55053 | 66577 | 70268 | 62750 | 78360 | 74802 | 66954 | 78128 | 64103 | 76815 | 64753 | 80736 | 58587 | 45196 | 62066 | 66966 | 73300 | 70596 | 80837 | 80021 | 62174 | 81896 | 84579 | 75138 | 69301 | 78782 | Stmn1  |       |
| Stmn2  | 18204 | 21475 | 17093 | 24723 | 36387 | 29012 | 32407 | 45878 | 36359 | 37142 | 32402 | 28979 | 33962 | 31902 | 26570 | 19195 | 22393 | 28051 | 30276 | 35052 | 32470 | 47912 | 35481 | 32141 | 40744 | 23180 | 29141 | 30524 | Stmn2  |       |
| Stmn3  | 5376  | 8037  | 5971  | 9613  | 12378 | 9565  | 11644 | 12234 | 11830 | 11967 | 9507  | 9407  | 8788  | 10182 | 7923  | 5691  | 8633  | 9613  | 11752 | 12394 | 12949 | 12325 | 11585 | 10161 | 12945 | 8424  | 9549  | 9597  | Stmn3  |       |
| Stmn4  | 5424  | 7266  | 6675  | 9594  | 11146 | 8749  | 10920 | 8243  | 7674  | 9064  | 7328  | 6495  | 5338  | 7914  | 7713  | 5321  | 9013  | 9516  | 10776 | 10612 | 11608 | 10169 | 7519  | 8219  | 9335  | 6508  | 6723  | 7155  | Stmn4  |       |
| Stmnd1 | 0     | 3     | 8     | 4     | 0     | 0     | 0     | 0     | 9     | 7     | 17    | 1     | 1     | 0     | 4     | 3     | 1     | 0     | 2     | 1     | 0     | 3     | 5     | 0     | 7     | 0     | 3     | 2     | Stmnd1 |       |
| Strn1  | 1510  | 1480  | 1529  | 1069  | 1204  | 1345  | 1150  | 2045  | 2118  | 1986  | 2100  | 2207  | 2301  | 2056  | 1298  | 1438  | 1314  | 1197  | 1248  | 1247  | 1147  | 1761  | 2034  | 1874  | 1847  | 2520  | 2393  | 2200  | Strn1  |       |
| Stom   | 3606  | 3314  | 3111  | 2779  | 2553  | 2623  | 2452  | 1072  | 1198  | 963   | 1215  | 813   | 1012  | 802   | 3413  | 3593  | 3011  | 2747  | 2177  | 2458  | 2348  | 1053  | 1552  | 993   | 897   | 1100  | 894   | 989   | Stom   |       |
| Stoml1 | 2591  | 3174  | 2429  | 3618  | 3512  | 3339  | 3125  | 2623  | 2927  | 2638  | 2493  | 2624  | 2459  | 2371  | 2860  | 2759  | 3006  | 3356  | 3642  | 3438  | 3158  | 3146  | 2849  | 2709  | 3065  | 2360  | 2486  | 2281  | Stoml1 |       |
| Stoml2 | 4738  | 5399  | 5118  | 4341  | 3607  | 4095  | 4099  | 4612  | 4769  | 4210  | 4343  | 5099  | 4884  | 5191  | 4555  | 4529  | 4527  | 3779  | 4387  | 5074  | 3954  | 3684  | 4709  | 4878  | 4518  | 6200  | 5833  | 5749  | Stoml2 |       |
| Stoml3 | 24    | 20    | 24    | 41    | 15    | 26    | 44    | 9     | 3     | 5     | 8     | 8     | 3     | 6     | 17    | 29    | 31    | 50    | 32    | 17    | 39    | 3     | 6     | 2     | 1     | 6     | 8     | 1     | Stoml3 |       |
| Ston1  | 1316  | 1373  | 1383  | 1079  | 1163  | 1280  | 1093  | 923   | 1364  | 1012  | 1403  | 1086  | 1280  | 928   | 1234  | 1515  | 1365  | 1274  | 1256  | 979   | 1066  | 886   | 1399  | 1126  | 902   | 931   | 1010  | 943   | Ston1  |       |
| Ston2  | 4331  | 4399  | 4435  | 6119  | 5375  | 4855  | 6301  | 2500  | 2823  | 2823  | 2712  | 3810  | 3679  | 3830  | 4178  | 4339  | 5212  | 5885  | 5488  | 4809  | 5854  | 2102  | 2666  | 3287  | 3096  | 2926  | 3517  | 3819  | Ston2  |       |
| Stox1  | 294   | 276   | 262   | 247   | 192   | 212   | 235   | 211   | 180   | 251   | 175   | 204   | 193   | 213   | 274   | 313   | 221   | 223   | 232   | 180   | 212   | 172   | 211   | 239   | 244   | 207   | 155   | 179   | Stox1  |       |
| Stox2  | 15606 | 14194 | 15091 | 19422 | 21315 | 20907 | 21131 | 19723 | 18488 | 22387 | 19216 | 25046 | 21368 | 25990 | 15329 | 13738 | 17616 | 17865 | 21378 | 17901 | 21337 | 22363 | 16204 | 20212 | 25970 | 13749 | 24205 | 24143 | Stox2  |       |
| Stpg1  | 8     | 17    | 25    | 15    | 20    | 24    | 15    | 39    | 26    | 38    | 35    | 63    | 82    | 43    | 22    | 27    | 30    | 26    | 16    | 19    | 21    | 38    | 47    | 28    | 45    | 40    | 55    | 61    | Stpg1  |       |
| Stpg2  | 5     | 4     | 2     | 4     | 10    | 8     | 8     | 5     | 7     | 1     | 1     | 8     | 6     | 3     | 4     | 3     | 6     | 0     | 4     | 3     | 4     | 5     | 8     | 12    | 3     | 5     | 3     | 7     | Stpg2  |       |
| Stpg3  | 1     | 2     | 0     | 1     | 2     | 1     | 0     | 0     | 1     | 1     | 4     | 0     | 0     | 0     | 0     | 1     | 0     | 1     | 2     | 1     | 6     | 0     | 0     | 2     | 3     | 4     | 2     | 0     | Stpg3  |       |
| Stpg4  | 0     | 3     | 0     | 7     | 1     | 15    | 9     | 1     | 13    | 5     | 6     | 2     | 2     | 1     | 3     | 2     | 9     | 7     | 5     | 10    | 9     | 8     | 5     | 0     | 4     | 7     | 8     | 2     | Stpg4  |       |
| Stra6  | 713   | 590   | 642   | 469   | 894   | 488   | 523   | 1084  | 1266  | 1255  | 1646  | 948   | 1318  | 932   | 564   | 769   | 564   | 668   | 571   | 511   | 549   | 1447  | 1450  | 1334  | 994   | 1929  | 810   | 954   | Stra6  |       |
| Stra6l | 178   | 154   | 122   | 212   | 268   | 335   | 272   | 267   | 253   | 355   | 309   | 275   | 180   | 287   | 171   | 114   | 163   | 216   | 253   | 302   | 358   | 289   | 210   | 261   | 409   | 152   | 227   | 173   | Stra6l |       |
| Stra8  | 0     | 0     | 0     | 0     | 0     | 0     | 0     | 0     | 0     | 0     | 0     | 0     | 0     | 0     | 0     | 2     | 0     | 0     | 0     | 0     | 0     | 0     | 0     | 0     | 0     | 0     | 2     | 0     | 0      | Stra8 |
| Strada | 2388  | 2642  | 2353  | 2284  | 2144  | 2590  | 2129  | 2386  | 2584  | 2359  | 2511  | 2599  | 2583  | 2705  | 2441  | 2533  | 2195  | 2165  | 2240  | 2602  | 2333  | 2159  | 2530  | 2434  | 2580  | 2728  | 2907  | 2632  | Strada |       |
| Stradb | 2844  | 2744  | 2460  | 3111  | 3704  | 3411  | 3850  | 3384  | 3198  | 2915  | 2927  | 2615  | 2633  | 2775  | 3041  | 2602  | 2968  | 3288  | 3420  | 3812  | 4031  | 3457  | 3176  | 2857  | 3059  | 2244  | 2575  | 2676  | Stradb |       |
| Strap  | 22885 | 18489 | 21866 | 18552 | 17487 | 17819 | 20046 | 17653 | 14576 | 14367 | 13381 | 17582 | 16023 | 17403 | 22971 | 19767 | 19288 | 17539 | 18227 | 20449 | 18628 | 14800 | 14863 | 15561 | 15261 | 19665 | 18204 | 18823 | Strap  |       |
| Strbp  | 15252 | 12552 | 15693 | 17058 | 18547 | 17611 | 19703 | 16838 | 13292 | 16146 | 14403 | 16728 | 15492 | 17958 | 15587 | 12920 | 16465 | 17146 | 18651 | 16344 | 19104 | 19231 | 13345 | 17074 | 18685 | 16157 | 16066 | 17751 | Strbp  |       |
| Strc   | 2     | 3     | 0     | 8     | 8     | 6     | 2     | 5     | 6     | 0     | 5     | 3     | 8     | 5     | 0     | 2     | 10    | 12    | 11    | 3     | 4     | 7     | 5     | 11    | 1     | 8     | 9     | 4     | Strc   |       |
| Strip1 | 9388  | 10549 | 8445  | 10216 | 10738 | 10355 | 10860 | 11093 | 11277 | 11155 | 9848  | 11714 | 10237 | 11324 | 9393  | 8828  | 9655  | 10294 | 11036 | 10441 | 11021 | 12333 | 10550 | 11438 | 12246 | 10377 | 11068 | 11160 | Strip1 |       |
| Strip2 | 1187  | 1074  | 879   | 1066  | 1235  | 1088  | 1158  | 275   | 313   | 282   | 251   | 188   | 278   | 173   | 1187  | 1323  | 1035  | 1158  | 944   | 1136  | 1111  | 309   | 351   | 181   | 270   | 147   | 213   | 184   | Strip2 |       |
| Strt1  | 0     | 0     | 0     | 0     | 0     | 0     | 0     | 0     | 0     | 0     | 0     | 0     | 0     | 0     | 0     | 1     | 0     | 0     | 0     | 0     | 0     | 0     | 0     | 0     | 0     | 0     | 0     | 0     | 0      | Strt1 |
| Strn   | 5494  | 4620  | 4550  | 5444  | 5605  | 5821  | 5612  | 4714  | 4473  | 4050  | 4580  | 4964  | 4797  | 4802  | 5474  | 5400  | 4933  | 5416  | 5156  | 5073  | 5745  | 4610  | 4409  | 3940  | 4792  | 3782  | 5054  | 4379  | Strn   |       |
| Strn3  | 6158  | 4358  | 5312  | 5192  | 6251  | 6358  | 6519  | 9738  | 8721  | 7947  | 8557  | 9634  | 8946  | 9640  | 6626  | 5288  | 5817  | 5576  | 6273  | 6287  | 6229  | 9354  | 8708  | 8272  | 8750  | 8775  | 9860  | 9630  | Strn3  |       |
| Strn4  | 6717  | 8352  | 7688  | 8785  | 9970  | 9108  | 9733  | 10345 | 11555 | 12541 | 11413 | 13203 | 11378 | 12232 | 6711  | 6818  | 9049  | 9134  | 10715 | 8682  | 6228  | 12879 | 11110 | 12879 | 13359 | 12135 | 12821 | 11714 | Strn4  |       |
| Stt3a  | 12423 | 10568 | 10335 | 8274  | 7050  | 7666  | 7383  | 9649  | 8708  | 8077  | 9610  | 8220  | 8811  | 7989  | 11501 | 11612 | 8764  | 8905  | 7314  | 8225  | 7200  | 8900  | 9563  | 8193  | 7289  | 9298  | 8407  | 8594  | Stt3a  |       |
| Stt3b  | 14935 | 14068 | 14991 | 14601 | 13812 | 13602 | 14152 | 14067 | 13188 | 12541 | 13605 | 12784 | 13113 | 12962 | 15140 | 15217 | 13906 | 13970 | 13764 | 13342 | 14580 | 13966 | 13502 | 12258 | 12750 | 12947 | 12831 | 13604 | Stt3b  |       |
| Stub1  | 5022  | 6374  | 5680  | 5793  | 5139  | 5185  | 5243  | 3423  | 4418  | 4549  | 4870  | 4718  | 4581  | 4531  | 4812  | 5274  | 6135  | 5302  | 5598  | 4884  | 5371  | 3873  | 4326  | 4790  | 4521  | 5360  | 4596  | 4778  | Stub1  |       |
| Stum   | 662   | 749   | 570   | 737   | 1209  | 775   | 761   | 307   | 417   | 468   | 683   | 173   | 251   | 148   | 758   | 889   | 671   | 754   | 862   | 551   | 498   | 275   | 366   | 21    |       |       |       |       |        |       |

|         |       |       |       |       |       |       |       |       |       |       |       |       |       |       |       |       |       |       |       |       |       |       |       |       |       |       |       |        |         |
|---------|-------|-------|-------|-------|-------|-------|-------|-------|-------|-------|-------|-------|-------|-------|-------|-------|-------|-------|-------|-------|-------|-------|-------|-------|-------|-------|-------|--------|---------|
| Suds3   | 12389 | 13499 | 13483 | 14418 | 12401 | 12273 | 13020 | 7860  | 7725  | 8567  | 7622  | 8432  | 7896  | 9038  | 11859 | 11335 | 13935 | 13537 | 14294 | 12385 | 13932 | 7626  | 7382  | 8646  | 8694  | 8690  | 8621  | 9053   | Suds3   |
| Sufu    | 4531  | 5340  | 5657  | 5723  | 4971  | 4905  | 4562  | 3274  | 3904  | 4081  | 4029  | 4766  | 4257  | 4567  | 4032  | 5134  | 5490  | 5604  | 5297  | 3925  | 5072  | 3745  | 3816  | 4560  | 4193  | 5047  | 4227  | 4580   | Sufu    |
| Sugct   | 70    | 41    | 95    | 77    | 52    | 75    | 58    | 61    | 76    | 93    | 69    | 77    | 62    | 66    | 76    | 79    | 71    | 57    | 55    | 56    | 59    | 90    | 90    | 56    | 60    | 66    | 49    | 72     | Sugct   |
| Sup1    | 3873  | 4112  | 4004  | 4678  | 4269  | 4349  | 4081  | 3530  | 4163  | 4169  | 4255  | 4593  | 4341  | 4591  | 4030  | 3717  | 4406  | 4394  | 4495  | 3638  | 4129  | 4181  | 3878  | 4335  | 4719  | 4419  | 4190  | 4314   | Sup1    |
| Sup2    | 8450  | 9993  | 8809  | 11578 | 11454 | 10797 | 11688 | 8999  | 8912  | 10319 | 9553  | 10713 | 9486  | 10375 | 8665  | 8508  | 10262 | 11274 | 11956 | 9976  | 11709 | 11214 | 8016  | 10377 | 11875 | 8250  | 9935  | 9975   | Sup2    |
| Sugt1   | 10589 | 9005  | 8697  | 8340  | 8049  | 8646  | 9637  | 8767  | 7429  | 6824  | 6464  | 7910  | 7204  | 8008  | 10941 | 9693  | 8981  | 8419  | 8352  | 9977  | 9332  | 7406  | 7671  | 7258  | 7120  | 7993  | 8229  | 8254   | Sugt1   |
| Sulf1   | 10823 | 10718 | 10188 | 6420  | 7643  | 8130  | 5111  | 15299 | 14954 | 11487 | 13444 | 9906  | 17361 | 8989  | 14213 | 15457 | 8641  | 7410  | 5761  | 7660  | 5749  | 11887 | 15800 | 8368  | 8464  | 9106  | 11223 | 10383  | Sulf1   |
| Sulf2   | 11066 | 12938 | 13660 | 9971  | 9810  | 10167 | 5655  | 12146 | 15177 | 15278 | 19655 | 14220 | 20181 | 12312 | 11424 | 16957 | 11444 | 11197 | 7614  | 5757  | 6142  | 16883 | 16717 | 13872 | 12803 | 16619 | 14645 | 14512  | Sulf2   |
| Sult1a1 | 31    | 30    | 45    | 46    | 60    | 35    | 57    | 35    | 80    | 69    | 123   | 27    | 23    | 23    | 32    | 30    | 42    | 62    | 62    | 50    | 75    | 84    | 135   | 56    | 62    | 11    | 17    | 15     | Sult1a1 |
| Sult1b1 | 12    | 3     | 0     | 4     | 0     | 0     | 0     | 6     | 7     | 14    | 2     | 0     | 0     | 1     | 5     | 2     | 2     | 0     | 0     | 1     | 0     | 0     | 16    | 11    | 0     | 26    | 0     | 0      | Sult1b1 |
| Sult1c1 | 3     | 0     | 0     | 2     | 0     | 0     | 0     | 5     | 12    | 21    | 7     | 0     | 0     | 0     | 3     | 1     | 0     | 0     | 0     | 0     | 1     | 0     | 20    | 16    | 1     | 6     | 0     | 0      | Sult1c1 |
| Sult1d1 | 9     | 1     | 0     | 4     | 0     | 0     | 0     | 16    | 23    | 21    | 14    | 0     | 2     | 1     | 4     | 1     | 0     | 0     | 0     | 0     | 0     | 0     | 40    | 54    | 0     | 35    | 0     | 0      | Sult1d1 |
| Sult1e1 | 143   | 41    | 0     | 139   | 0     | 1     | 1     | 276   | 124   | 177   | 137   | 0     | 61    | 29    | 70    | 82    | 8     | 0     | 0     | 1     | 0     | 2     | 215   | 440   | 0     | 489   | 2     | 0      | Sult1e1 |
| Sult2a7 | 0     | 0     | 0     | 0     | 0     | 1     | 0     | 0     | 0     | 0     | 0     | 0     | 0     | 0     | 1     | 1     | 0     | 3     | 0     | 0     | 0     | 0     | 0     | 0     | 0     | 0     | 0     | 0      | Sult2a7 |
| Sult2a8 | 0     | 0     | 0     | 0     | 0     | 0     | 1     | 0     | 0     | 1     | 0     | 0     | 0     | 0     | 0     | 0     | 0     | 0     | 0     | 0     | 3     | 0     | 0     | 0     | 0     | 0     | 0     | 0      | Sult2a8 |
| Sult2b1 | 75    | 84    | 78    | 80    | 67    | 61    | 75    | 88    | 82    | 117   | 68    | 72    | 59    | 53    | 69    | 57    | 58    | 56    | 56    | 62    | 55    | 89    | 81    | 84    | 76    | 74    | 37    | 53     | Sult2b1 |
| Sult3a1 | 0     | 0     | 0     | 0     | 0     | 0     | 0     | 1     | 0     | 0     | 0     | 0     | 1     | 0     | 0     | 0     | 0     | 0     | 0     | 0     | 0     | 0     | 0     | 0     | 0     | 0     | 0     | 0      | Sult3a1 |
| Sult4a1 | 1825  | 2366  | 2297  | 3101  | 3915  | 2893  | 2997  | 1981  | 2480  | 2889  | 2334  | 1657  | 1505  | 1709  | 2020  | 2126  | 2656  | 3220  | 3597  | 2900  | 3253  | 2916  | 2331  | 2454  | 2826  | 1756  | 1462  | 1269   | Sult4a1 |
| Sult5a1 | 163   | 154   | 84    | 63    | 44    | 89    | 35    | 181   | 315   | 198   | 326   | 101   | 195   | 95    | 129   | 180   | 87    | 134   | 30    | 17    | 13    | 160   | 368   | 136   | 101   | 136   | 170   | 158    | Sult5a1 |
| Sult6b1 | 5     | 7     | 2     | 1     | 11    | 4     | 8     | 7     | 15    | 5     | 12    | 0     | 0     | 3     | 11    | 9     | 2     | 19    | 7     | 4     | 4     | 2     | 14    | 14    | 8     | 10    | 1     | 6      | Sult6b1 |
| Sult6b2 | 23    | 22    | 19    | 33    | 31    | 36    | 38    | 11    | 11    | 8     | 14    | 7     | 10    | 6     | 13    | 21    | 24    | 39    | 39    | 22    | 30    | 20    | 16    | 10    | 13    | 8     | 16    | 9      | Sult6b2 |
| Sumf1   | 916   | 942   | 1241  | 866   | 776   | 865   | 830   | 1142  | 1219  | 1117  | 1251  | 1267  | 1338  | 1315  | 1017  | 1075  | 956   | 887   | 844   | 816   | 739   | 1153  | 1379  | 1260  | 1095  | 1661  | 1350  | 1256   | Sumf1   |
| Sumf2   | 1438  | 1633  | 1458  | 1299  | 1192  | 1322  | 1095  | 1570  | 1870  | 1520  | 1855  | 1565  | 1758  | 1541  | 1483  | 1574  | 1360  | 1315  | 1137  | 1260  | 1137  | 1375  | 1999  | 1609  | 1529  | 1742  | 1720  | 1640   | Sumf2   |
| Sumo1   | 12689 | 9963  | 13049 | 11239 | 9973  | 10653 | 13748 | 11655 | 9800  | 9169  | 9076  | 11354 | 10651 | 12469 | 13710 | 11883 | 11704 | 10517 | 11475 | 14598 | 12261 | 9272  | 9956  | 10325 | 10333 | 13684 | 11221 | 13659  | Sumo1   |
| Sumo2   | 11900 | 11410 | 5823  | 11432 | 10222 | 10495 | 7077  | 13824 | 10518 | 12540 | 11997 | 14984 | 10669 | 17055 | 8834  | 11810 | 12430 | 9530  | 12064 | 15120 | 12238 | 8813  | 11361 | 13594 | 14374 | 10443 | 16636 | 18278  | Sumo2   |
| Sumo3   | 6108  | 4998  | 5882  | 5292  | 4718  | 5289  | 5306  | 8013  | 7182  | 6967  | 6850  | 7827  | 7419  | 8102  | 5919  | 4727  | 5146  | 4602  | 5403  | 5460  | 5547  | 6727  | 7228  | 7644  | 7102  | 9407  | 8320  | 8967   | Sumo3   |
| Sun1    | 10338 | 11625 | 8456  | 9592  | 8922  | 10257 | 9189  | 5887  | 6061  | 5352  | 5822  | 6019  | 5854  | 5651  | 10255 | 10191 | 8867  | 9866  | 9158  | 10058 | 9663  | 5544  | 5763  | 5578  | 6142  | 5111  | 6255  | 5553   | Sun1    |
| Sun2    | 5231  | 6386  | 7359  | 9884  | 7721  | 7101  | 7415  | 4593  | 4993  | 6295  | 5749  | 5963  | 5581  | 5978  | 5124  | 5549  | 7631  | 7949  | 8613  | 5902  | 7507  | 5720  | 4768  | 6474  | 6958  | 5934  | 5262  | 5917   | Sun2    |
| Sun3    | 1     | 2     | 3     | 7     | 8     | 2     | 3     | 0     | 2     | 1     | 4     | 3     | 1     | 5     | 8     | 3     | 5     | 12    | 2     | 3     | 4     | 3     | 7     | 2     | 2     | 3     | 1     | 6      | Sun3    |
| Sun5    | 0     | 0     | 0     | 0     | 0     | 0     | 0     | 0     | 1     | 0     | 0     | 0     | 0     | 0     | 0     | 0     | 0     | 0     | 0     | 0     | 0     | 0     | 0     | 0     | 0     | 0     | 0     | 0      | Sun5    |
| Suox    | 2073  | 2357  | 2081  | 1896  | 1601  | 1739  | 1496  | 957   | 950   | 848   | 907   | 778   | 852   | 776   | 2016  | 2302  | 1804  | 1776  | 1625  | 1690  | 1611  | 817   | 1069  | 809   | 770   | 929   | 897   | 877    | Suox    |
| Supt16  | 25452 | 22702 | 24690 | 21375 | 18780 | 21755 | 22787 | 23243 | 20372 | 18819 | 18145 | 22885 | 25833 | 25358 | 22535 | 23114 | 19992 | 20620 | 24429 | 21249 | 17296 | 19045 | 21199 | 20783 | 25589 | 26935 | 25488 | Supt16 |         |
| Supt20  | 10304 | 9487  | 9359  | 9294  | 9270  | 9194  | 10073 | 9589  | 9199  | 8790  | 9635  | 9200  | 9892  | 10147 | 9703  | 9108  | 9089  | 9308  | 10188 | 9909  | 9155  | 8842  | 9211  | 8679  | 9073  | 9094  | 8795  | Supt20 |         |
| Supt3   | 728   | 685   | 723   | 582   | 512   | 473   | 510   | 832   | 908   | 849   | 907   | 849   | 963   | 1018  | 593   | 699   | 628   | 512   | 559   | 452   | 600   | 904   | 908   | 764   | 853   | 1056  | 919   | 1025   | Supt3   |
| Supt4a  | 2451  | 2806  | 2713  | 2704  | 2401  | 2188  | 2544  | 2282  | 2437  | 2140  | 2500  | 2526  | 2592  | 2611  | 2673  | 2607  | 2560  | 2335  | 2453  | 2880  | 2507  | 2022  | 2383  | 2469  | 2308  | 2793  | 2672  | 2766   | Supt4a  |
| Supt5   | 17710 | 20352 | 20115 | 20794 | 18185 | 18151 | 17404 | 11930 | 13282 | 13634 | 12868 | 14685 | 13151 | 13599 | 16742 | 18405 | 19751 | 19430 | 20011 | 16811 | 17889 | 12995 | 12479 | 14566 | 14031 | 14820 | 13959 | 13991  | Supt5   |
| Supt6   | 19474 | 20609 | 17055 | 19115 | 16878 | 17654 | 18105 | 12974 | 13867 | 14803 | 14274 | 14668 | 14274 | 14953 | 18670 | 19613 | 17649 | 18652 | 16858 | 15680 | 18164 | 14509 | 13093 | 14060 | 15381 | 11222 | 14164 | 14089  | Supt6   |
| Supt7   | 1247  | 1307  | 1408  | 1218  | 1355  | 1266  | 1309  | 2038  | 2078  | 2097  | 2046  | 2629  | 2335  | 2424  | 1313  | 1205  | 1409  | 1136  | 1384  | 1317  | 1261  | 2054  | 2084  | 2435  | 2219  | 2697  | 2480  | 2627   | Supt7   |
| Supv311 | 1955  | 1886  | 1905  | 1557  | 1489  | 1775  | 1789  | 2127  | 2122  | 1979  | 1935  | 2401  | 2240  | 2392  | 1789  | 1651  | 1743  | 1533  | 1683  | 1693  | 1764  | 2057  | 2030  | 2048  | 2204  | 2320  | 2219  | 2397   | Supv311 |
| Surf1   | 1301  | 1511  | 1437  | 1308  | 1307  | 1341  | 1402  | 1419  | 1523  | 1459  | 1486  | 1509  | 1529  | 1510  | 1366  | 1301  | 1304  | 1356  | 1389  | 1521  | 1377  | 1457  | 1542  | 1532  | 1512  | 1642  | 1557  | 1477   | Surf1   |
| Surf2   | 2194  | 2824  | 2602  | 2852  | 2408  | 2498  | 2256  | 2566  | 2190  | 2452  | 2210  | 2518  | 2439  | 2544  | 2487  | 2414  | 2593  | 2632  | 2524  | 2775  | 2376  | 2453  | 2084  | 2506  | 2483  | 2637  | 2625  | 2356   | Surf2   |
| Surf4   | 12537 | 12487 | 12537 | 9765  | 8715  | 9611  | 8410  | 10538 | 11848 | 10203 | 12487 | 10622 | 11616 | 9981  | 11339 | 12699 | 11276 | 9598  | 9470  | 8730  | 8557  | 10860 | 13041 | 10783 | 9865  | 12747 | 11391 | 11190  | Surf4   |
| Surf6   | 2374  | 2870  | 2692  | 2819  | 2549  | 2594  | 2277  | 2503  | 2791  | 2829  | 2805  | 2815  | 2833  | 2937  | 2236  | 2502  | 2904  | 2737  | 2583  | 2548  | 2425  | 2506  | 2603  | 2907  | 2920  | 3106  | 3217  | 2962   | Surf6   |
| Susd1   | 239   | 187   | 207   | 151   | 141   | 174   | 103   | 249   | 293   | 256   | 285   | 222   | 280   | 220   | 227   | 225   | 108   | 177   | 119   | 143   | 110   | 229   | 322   | 239   | 209   | 284   | 224   | 195    | Susd1   |
| Susd2   | 258   | 447   | 335   | 404   | 342   | 305   | 304   | 216   | 229   | 273   | 321   | 260   | 243   | 235   | 311   | 396   | 387   | 491   | 364   | 270   | 349   | 296   | 311   | 252   | 249   | 300   | 238   | 256    | Susd2   |
| Susd3   | 116   | 96    | 68    | 90    | 62    | 66    | 30    | 20    | 20    | 18    | 23    | 26    | 22    | 15    | 78    | 143   | 61    | 76    | 48    | 51    | 44    | 12    | 27    | 18    | 34    | 37    | 16    | 18     | Susd3   |
| Susd4   | 1700  | 1759  | 2130  | 2443  | 2964  | 2185  | 2302  | 2052  | 2178  | 2532  | 2073  | 2033  | 2108  | 1881  | 1873  | 1861  | 2377  | 2363  | 2713  | 2227  | 2490  | 3083  | 2084  | 2147  | 2496  | 1734  | 1888  | 1812   | Susd4   |
| Susd5   | 59    | 59    | 17    | 82    | 44    | 187   | 7     | 396   | 817   | 1098  | 1891  | 71    | 141   | 67    | 58    | 76    | 30    | 114   | 83    | 6     | 6     | 819   | 548   | 794   | 388   | 197   | 72    | 56     | Susd5   |
| Susd6   | 3658  | 3548  | 4027  | 4090  | 3671  | 3483  | 3818  | 2584  | 2604  | 2713  | 2936  | 2954  | 2869  | 2844  | 3563  | 3712  | 3986  | 4002  | 3811  | 3043  | 3542  | 3038  | 2774  | 2739  | 2994  | 2791  | 2895  | 3113   | Susd6   |
| Suv39h1 | 5371  | 5268  |       |       |       |       |       |       |       |       |       |       |       |       |       |       |       |       |       |       |       |       |       |       |       |       |       |        |         |



|          |       |       |       |       |       |       |       |       |       |       |       |       |       |       |       |       |       |       |       |       |       |       |       |       |       |       |       |       |          |
|----------|-------|-------|-------|-------|-------|-------|-------|-------|-------|-------|-------|-------|-------|-------|-------|-------|-------|-------|-------|-------|-------|-------|-------|-------|-------|-------|-------|-------|----------|
| Syde1    | 1638  | 1690  | 1765  | 1112  | 964   | 1365  | 977   | 1730  | 2198  | 1852  | 2269  | 1927  | 2239  | 1742  | 1444  | 1643  | 1352  | 1116  | 1079  | 1003  | 905   | 1512  | 2139  | 1904  | 1517  | 2423  | 2019  | 1798  | Syde1    |
| Syde2    | 1283  | 1105  | 1096  | 1166  | 1145  | 1160  | 1048  | 670   | 778   | 636   | 744   | 683   | 684   | 666   | 1092  | 1293  | 1117  | 1148  | 1113  | 929   | 977   | 587   | 680   | 664   | 545   | 624   | 589   | 625   | Syde2    |
| Syf2     | 2957  | 3240  | 3168  | 2853  | 2598  | 2513  | 3007  | 2988  | 2814  | 2621  | 2649  | 2657  | 2530  | 3476  | 3247  | 2897  | 3038  | 2914  | 2692  | 3294  | 3155  | 2575  | 2798  | 3023  | 2900  | 3333  | 2790  | 3252  | Syf2     |
| Syk      | 539   | 644   | 584   | 497   | 466   | 535   | 313   | 519   | 714   | 629   | 716   | 622   | 848   | 498   | 547   | 843   | 619   | 467   | 452   | 476   | 318   | 623   | 827   | 538   | 652   | 659   | 600   | 567   | Syk      |
| Sympk    | 12923 | 15938 | 18021 | 16407 | 14369 | 13828 | 13058 | 9550  | 11281 | 13230 | 11873 | 15010 | 12303 | 12825 | 11755 | 14590 | 17206 | 16002 | 16747 | 11037 | 14226 | 12109 | 10978 | 13866 | 12965 | 15624 | 12280 | 13091 | Sympk    |
| Syn1     | 2121  | 2685  | 3299  | 4753  | 6119  | 4269  | 4400  | 2489  | 2763  | 3905  | 3145  | 3040  | 2079  | 2508  | 2461  | 2188  | 4298  | 5229  | 5644  | 3301  | 5210  | 5569  | 2452  | 3224  | 3928  | 2503  | 1833  | 2191  | Syn1     |
| Syn2     | 1186  | 1495  | 1074  | 2319  | 3881  | 2673  | 2739  | 1461  | 1773  | 1806  | 1672  | 937   | 904   | 901   | 1483  | 1399  | 2045  | 2795  | 2905  | 2485  | 3174  | 2336  | 1457  | 1289  | 2056  | 652   | 687   | 686   | Syn2     |
| Syn3     | 346   | 504   | 166   | 625   | 1027  | 841   | 781   | 747   | 926   | 827   | 776   | 695   | 650   | 619   | 458   | 422   | 284   | 603   | 667   | 729   | 840   | 984   | 855   | 532   | 947   | 83    | 712   | 431   | Syn3     |
| Syna     | 2     | 0     | 0     | 0     | 2     | 1     | 0     | 1     | 1     | 0     | 1     | 1     | 0     | 0     | 1     | 0     | 0     | 2     | 2     | 2     | 0     | 0     | 3     | 2     | 0     | 6     | 0     | 0     | Syna     |
| Sync     | 104   | 144   | 130   | 111   | 121   | 114   | 86    | 81    | 104   | 67    | 348   | 59    | 117   | 48    | 88    | 134   | 94    | 138   | 82    | 118   | 83    | 112   | 236   | 51    | 49    | 65    | 38    | 49    | Sync     |
| Syncrip  | 20556 | 13761 | 17193 | 16515 | 16436 | 18550 | 20749 | 29775 | 25092 | 22901 | 23699 | 27094 | 25203 | 29715 | 19852 | 15949 | 15733 | 15738 | 17478 | 19215 | 19349 | 24371 | 24203 | 25279 | 26743 | 28406 | 28416 | 29374 | Syncrip  |
| Syndig1  | 279   | 327   | 315   | 253   | 319   | 330   | 244   | 355   | 410   | 445   | 479   | 386   | 425   | 336   | 309   | 340   | 321   | 296   | 287   | 242   | 216   | 394   | 494   | 382   | 355   | 333   | 365   | 439   | Syndig1  |
| Syndig11 | 25    | 35    | 73    | 71    | 230   | 102   | 96    | 169   | 156   | 208   | 160   | 83    | 125   | 85    | 62    | 51    | 66    | 98    | 120   | 106   | 114   | 267   | 189   | 144   | 215   | 59    | 62    | 66    | Syndig11 |
| Syne1    | 2262  | 1854  | 825   | 1161  | 2157  | 1996  | 1409  | 3488  | 4372  | 2728  | 3439  | 1679  | 2452  | 1614  | 1913  | 2523  | 907   | 1451  | 1279  | 2150  | 1732  | 2542  | 3981  | 1494  | 2460  | 830   | 2091  | 1463  | Syne1    |
| Syne2    | 19904 | 19963 | 9509  | 12832 | 14850 | 18151 | 17585 | 20395 | 22645 | 15029 | 14808 | 18595 | 15631 | 19129 | 18592 | 18801 | 11550 | 13372 | 15256 | 22296 | 19443 | 10709 | 17642 | 14278 | 18134 | 11706 | 21104 | 15829 | Syne2    |
| Syne3    | 602   | 636   | 316   | 594   | 428   | 496   | 379   | 184   | 203   | 179   | 405   | 88    | 104   | 84    | 513   | 652   | 379   | 533   | 411   | 372   | 381   | 117   | 311   | 167   | 116   | 64    | 71    | 68    | Syne3    |
| Syne4    | 1149  | 1280  | 1071  | 1295  | 1049  | 859   | 926   | 644   | 798   | 847   | 1082  | 530   | 706   | 568   | 959   | 1393  | 1136  | 1379  | 938   | 841   | 885   | 683   | 796   | 738   | 541   | 869   | 526   | 478   | Syne4    |
| Syngap4  | 7656  | 9519  | 11648 | 13814 | 14138 | 11558 | 12695 | 8234  | 9676  | 12659 | 11378 | 12004 | 10680 | 11673 | 7035  | 7992  | 13924 | 13569 | 15084 | 10255 | 13522 | 13525 | 8834  | 13782 | 14395 | 10985 | 10443 | 10964 | Syngap4  |
| SyngR1   | 2076  | 2631  | 2528  | 4035  | 5420  | 4122  | 4161  | 1441  | 1802  | 2308  | 1711  | 1287  | 1112  | 1226  | 2238  | 2174  | 3490  | 4768  | 5088  | 3869  | 4670  | 2293  | 1674  | 1863  | 2449  | 1014  | 1082  | 1056  | SyngR1   |
| SyngR2   | 1405  | 1695  | 1376  | 1083  | 835   | 1000  | 875   | 1451  | 570   | 458   | 554   | 481   | 589   | 483   | 1225  | 1554  | 1128  | 936   | 960   | 1018  | 897   | 429   | 724   | 449   | 444   | 549   | 474   | 564   | SyngR2   |
| SyngR3   | 925   | 1183  | 1264  | 1411  | 1669  | 1311  | 1436  | 1185  | 1267  | 1562  | 1362  | 1023  | 780   | 894   | 914   | 955   | 1348  | 1293  | 1633  | 1330  | 1575  | 2017  | 1339  | 1379  | 1626  | 908   | 837   | 866   | SyngR3   |
| SyngR4   | 16    | 15    | 9     | 14    | 16    | 7     | 16    | 12    | 10    | 9     | 8     | 21    | 22    | 17    | 16    | 15    | 16    | 10    | 8     | 8     | 11    | 13    | 22    | 10    | 12    | 11    | 14    | 19    | SyngR4   |
| Synj1    | 9004  | 8811  | 7875  | 12118 | 14037 | 13604 | 14148 | 8054  | 7700  | 8733  | 7616  | 7481  | 7235  | 7685  | 10108 | 8463  | 10349 | 12810 | 12295 | 12036 | 14332 | 9787  | 6942  | 7124  | 9804  | 4359  | 7140  | 7136  | Synj1    |
| Synj2    | 320   | 326   | 300   | 380   | 191   | 200   | 111   | 388   | 426   | 329   | 638   | 294   | 545   | 329   | 314   | 471   | 203   | 175   | 126   | 101   | 107   | 366   | 562   | 361   | 293   | 365   | 373   | 290   | Synj2    |
| Synj2bp  | 5046  | 3820  | 4583  | 4431  | 3926  | 4033  | 4464  | 3714  | 2856  | 2787  | 3106  | 3107  | 2924  | 3303  | 4845  | 4452  | 4493  | 4307  | 4011  | 4323  | 4521  | 3145  | 2991  | 2831  | 3217  | 2680  | 3176  | 3513  | Synj2bp  |
| Synn     | 1016  | 1144  | 795   | 1321  | 2386  | 1253  | 1288  | 1238  | 1396  | 1193  | 1622  | 558   | 1428  | 509   | 1473  | 1596  | 1067  | 1837  | 1180  | 1156  | 1298  | 1900  | 1074  | 596   | 1407  | 366   | 479   | 436   | Synn     |
| Synpo    | 2775  | 3026  | 2929  | 1851  | 1027  | 1762  | 622   | 2986  | 4192  | 4497  | 5905  | 2799  | 5325  | 2513  | 2494  | 4421  | 2188  | 1979  | 934   | 663   | 677   | 3706  | 3861  | 4001  | 2335  | 4884  | 3373  | 3297  | Synpo    |
| Synpo2   | 2768  | 2002  | 2096  | 1216  | 936   | 1153  | 768   | 883   | 1144  | 860   | 1671  | 948   | 1507  | 897   | 2302  | 3288  | 1388  | 1445  | 733   | 855   | 717   | 740   | 1474  | 891   | 620   | 1034  | 1340  | 951   | Synpo2   |
| Synpo2l  | 45    | 16    | 6     | 18    | 21    | 13    | 7     | 95    | 247   | 67    | 1720  | 45    | 81    | 36    | 20    | 40    | 25    | 21    | 9     | 19    | 12    | 221   | 847   | 39    | 53    | 39    | 43    | 15    | Synpo2l  |
| Synpr    | 484   | 394   | 420   | 563   | 977   | 800   | 822   | 1194  | 1018  | 921   | 866   | 659   | 857   | 788   | 841   | 581   | 458   | 700   | 695   | 941   | 825   | 1295  | 1236  | 598   | 868   | 706   | 762   | 750   | Synpr    |
| Synrg    | 5072  | 5193  | 4795  | 6539  | 7051  | 6589  | 6885  | 7669  | 7272  | 8450  | 7649  | 8895  | 7665  | 8463  | 5089  | 4594  | 5950  | 6373  | 7024  | 5674  | 7209  | 8961  | 6866  | 8051  | 9543  | 5964  | 8287  | 8018  | Synrg    |
| Syp      | 4986  | 6304  | 6636  | 9621  | 11072 | 8741  | 9164  | 6920  | 6590  | 8424  | 7068  | 5977  | 5404  | 6328  | 6078  | 4656  | 8492  | 9741  | 10328 | 8533  | 10413 | 8651  | 6066  | 7156  | 9270  | 5326  | 5345  | 5647  | Syp      |
| Sypl     | 6003  | 4418  | 4856  | 4706  | 4062  | 4467  | 4811  | 4354  | 4057  | 3274  | 4078  | 3748  | 4241  | 3786  | 5501  | 5751  | 4107  | 4576  | 3981  | 4692  | 4177  | 3735  | 4431  | 3622  | 3748  | 4189  | 3769  | 4085  | Sypl     |
| Sypl2    | 280   | 257   | 200   | 242   | 357   | 264   | 354   | 167   | 236   | 254   | 336   | 330   | 204   | 375   | 200   | 199   | 341   | 337   | 427   | 314   | 424   | 185   | 247   | 363   | 374   | 234   | 274   | 268   | Sypl2    |
| Sys1     | 978   | 999   | 919   | 861   | 901   | 833   | 952   | 1125  | 1112  | 1180  | 1109  | 1058  | 1072  | 1308  | 988   | 826   | 902   | 800   | 881   | 911   | 1028  | 1003  | 1039  | 1057  | 1177  | 987   | 1069  | 1256  | Sys1     |
| Syt1     | 4827  | 5393  | 3937  | 7693  | 10858 | 8599  | 10387 | 8707  | 8017  | 8236  | 7191  | 6306  | 5162  | 6383  | 6344  | 4187  | 6318  | 8444  | 9173  | 9572  | 10408 | 10926 | 7419  | 7111  | 9748  | 4492  | 5783  | 5459  | Syt1     |
| Syt10    | 18    | 35    | 7     | 22    | 48    | 25    | 31    | 24    | 22    | 27    | 34    | 30    | 10    | 6     | 30    | 29    | 16    | 31    | 25    | 43    | 32    | 22    | 27    | 21    | 13    | 5     | 21    | 8     | Syt10    |
| Syt11    | 13275 | 15558 | 16154 | 16484 | 17766 | 16415 | 17824 | 20019 | 19816 | 21250 | 17834 | 25456 | 20593 | 24515 | 15202 | 11992 | 16607 | 15964 | 18798 | 17348 | 17956 | 21383 | 17962 | 22323 | 24421 | 23308 | 24889 | 24744 | Syt11    |
| Syt12    | 108   | 160   | 158   | 141   | 165   | 111   | 101   | 98    | 136   | 204   | 182   | 152   | 174   | 166   | 128   | 186   | 126   | 144   | 139   | 140   | 122   | 147   | 168   | 188   | 166   | 255   | 158   | 163   | Syt12    |
| Syt13    | 2122  | 2743  | 2831  | 4087  | 5178  | 4486  | 4986  | 2845  | 2128  | 4350  | 3683  | 3180  | 2699  | 2896  | 2782  | 2858  | 3607  | 4667  | 5824  | 3771  | 5967  | 6119  | 3194  | 4339  | 5331  | 2255  | 2780  | 2682  | Syt13    |
| Syt14    | 5905  | 5402  | 3716  | 5154  | 5849  | 6142  | 6129  | 4929  | 4124  | 3604  | 3362  | 4119  | 3814  | 4338  | 5916  | 5448  | 4568  | 5252  | 5347  | 6041  | 6114  | 4274  | 3646  | 3299  | 4160  | 2765  | 4373  | 3836  | Syt14    |
| Syt15    | 17    | 15    | 10    | 24    | 29    | 31    | 16    | 40    | 53    | 62    | 75    | 55    | 62    | 63    | 15    | 5     | 21    | 21    | 28    | 16    | 20    | 72    | 69    | 67    | 45    | 85    | 56    | 56    | Syt15    |
| Syt16    | 856   | 783   | 521   | 1204  | 2287  | 1781  | 2064  | 2626  | 2532  | 2563  | 2061  | 1582  | 1380  | 1632  | 1027  | 717   | 778   | 1654  | 1592  | 1914  | 2063  | 3180  | 2279  | 1915  | 2846  | 1235  | 1409  | 1196  | Syt16    |
| Syt17    | 288   | 272   | 396   | 289   | 403   | 262   | 270   | 242   | 277   | 261   | 293   | 205   | 218   | 263   | 264   | 246   | 327   | 316   | 303   | 258   | 322   | 269   | 223   | 253   | 212   | 225   | 203   | 203   | Syt17    |
| Syt2     | 375   | 423   | 606   | 370   | 961   | 455   | 316   | 488   | 510   | 566   | 776   | 463   | 684   | 426   | 517   | 583   | 538   | 534   | 463   | 363   | 390   | 737   | 419   | 345   | 530   | 299   | 479   | 522   | Syt2     |
| Syt3     | 261   | 394   | 471   | 499   | 862   | 631   | 563   | 390   | 569   | 655   | 569   | 375   | 394   | 344   | 302   | 317   | 416   | 486   | 803   | 583   | 650   | 682   | 463   | 532   | 628   | 323   | 315   | 314   | Syt3     |
| Syt4     | 4845  | 5255  | 4718  | 8576  | 14753 | 11362 | 12367 | 13606 | 11471 | 11094 | 10182 | 6903  | 7912  | 7202  | 8433  | 5297  | 6843  | 9927  | 11386 | 14105 | 12641 | 14365 | 11631 | 8661  | 12177 | 3913  | 6974  | 6560  | Syt4     |
| Syt5     | 547   | 709   | 506   | 878   | 1248  | 1131  | 995   | 1567  | 1684  | 1894  | 1566  | 1474  | 1216  | 1468  | 559   | 447   | 691   | 866   | 1076  | 985   | 1104  | 2237  | 1614  | 1708  | 2020  |       |       |       |          |

|         |       |       |       |       |       |       |       |       |       |       |       |       |       |       |       |       |       |       |       |       |       |       |       |       |       |       |       |       |         |        |
|---------|-------|-------|-------|-------|-------|-------|-------|-------|-------|-------|-------|-------|-------|-------|-------|-------|-------|-------|-------|-------|-------|-------|-------|-------|-------|-------|-------|-------|---------|--------|
| Tacc1   | 4778  | 5429  | 6027  | 5994  | 6196  | 5860  | 6118  | 4610  | 4467  | 5101  | 4997  | 6117  | 5584  | 6363  | 4507  | 4689  | 6127  | 5939  | 6063  | 5134  | 6419  | 5138  | 4222  | 5395  | 5858  | 4712  | 6362  | 6357  | Tacc1   |        |
| Tacc2   | 4368  | 4480  | 5860  | 6252  | 7184  | 6344  | 5546  | 7017  | 7989  | 9493  | 8536  | 9437  | 8658  | 8733  | 4387  | 4359  | 6044  | 5909  | 7554  | 5089  | 6186  | 9605  | 7080  | 9059  | 9595  | 7685  | 8326  | 8699  | Tacc2   |        |
| Tacc3   | 11136 | 10718 | 11553 | 8553  | 5655  | 7263  | 8557  | 6611  | 6000  | 5543  | 5414  | 9181  | 7968  | 9553  | 9699  | 9656  | 9852  | 7408  | 7847  | 7426  | 7321  | 4664  | 5380  | 7491  | 6208  | 11609 | 9284  | 10090 | Tacc3   |        |
| Taco1   | 965   | 1093  | 1134  | 831   | 860   | 854   | 748   | 920   | 946   | 829   | 863   | 1024  | 1066  | 1030  | 963   | 945   | 1090  | 821   | 965   | 1023  | 775   | 750   | 916   | 972   | 906   | 1129  | 1063  | 1009  | Taco1   |        |
| Tacr1   | 123   | 211   | 143   | 222   | 498   | 327   | 259   | 412   | 390   | 469   | 442   | 288   | 406   | 327   | 224   | 157   | 218   | 261   | 283   | 197   | 314   | 560   | 350   | 270   | 355   | 122   | 321   | 287   | Tacr1   |        |
| Tacr2   | 0     | 0     | 3     | 0     | 0     | 0     | 0     | 2     | 0     | 0     | 1     | 0     | 1     | 0     | 0     | 3     | 2     | 1     | 0     | 0     | 0     | 0     | 1     | 0     | 0     | 0     | 0     | 0     | 0       | Tacr2  |
| Tacr3   | 158   | 151   | 144   | 149   | 311   | 183   | 226   | 250   | 204   | 254   | 203   | 147   | 192   | 110   | 185   | 145   | 158   | 227   | 263   | 279   | 190   | 246   | 189   | 139   | 162   | 97    | 92    | 154   | Tacr3   |        |
| Tacstd2 | 148   | 126   | 103   | 14    | 5     | 81    | 6     | 220   | 405   | 183   | 172   | 125   | 194   | 145   | 148   | 121   | 17    | 37    | 18    | 10    | 3     | 20    | 450   | 174   | 37    | 68    | 132   | 195   | Tacstd2 |        |
| Tada1   | 2299  | 2103  | 2149  | 2302  | 2774  | 2512  | 2773  | 4153  | 3947  | 3586  | 3350  | 3924  | 3494  | 3724  | 2363  | 2122  | 2329  | 2354  | 2915  | 2997  | 2854  | 3948  | 3897  | 3822  | 4142  | 3654  | 3794  | 3757  | Tada1   |        |
| Tada2a  | 3041  | 2634  | 3368  | 3356  | 2941  | 2817  | 3693  | 2585  | 2497  | 2166  | 2886  | 2892  | 3104  | 3409  | 2889  | 2707  | 3072  | 3356  | 2915  | 2908  | 3098  | 2660  | 2471  | 3201  | 2897  | 3467  | 2833  | 3337  | Tada2a  |        |
| Tada2b  | 2222  | 2262  | 2735  | 3027  | 3091  | 2850  | 3063  | 1992  | 1767  | 2286  | 2108  | 2533  | 2240  | 2636  | 2136  | 2179  | 2770  | 3167  | 2918  | 2207  | 3113  | 2628  | 1945  | 2350  | 2431  | 2499  | 2271  | 2713  | Tada2b  |        |
| Tada3   | 955   | 1330  | 1662  | 1480  | 1552  | 1261  | 1269  | 2004  | 2619  | 3029  | 2831  | 3178  | 2715  | 2826  | 882   | 1048  | 1501  | 1314  | 1651  | 1146  | 1306  | 2578  | 2524  | 3253  | 2963  | 3521  | 2504  | 2878  | Tada3   |        |
| Taf1    | 15610 | 13643 | 10556 | 12726 | 12265 | 14085 | 15179 | 11681 | 10224 | 9710  | 9724  | 11373 | 9928  | 12137 | 14927 | 13238 | 12077 | 12400 | 12239 | 14496 | 14629 | 9371  | 9864  | 9310  | 10593 | 8196  | 11237 | 10723 | Taf1    |        |
| Taf10   | 5166  | 5927  | 4936  | 5807  | 4839  | 4813  | 6182  | 3226  | 2872  | 2997  | 2927  | 3337  | 3053  | 3959  | 5169  | 4218  | 5451  | 5369  | 5337  | 4858  | 5997  | 2924  | 2826  | 3348  | 3304  | 3712  | 3477  | 3821  | Taf10   |        |
| Taf11   | 3690  | 3970  | 4413  | 3685  | 3224  | 3163  | 3962  | 3675  | 3544  | 3894  | 3545  | 4419  | 4224  | 4711  | 3640  | 3653  | 3892  | 3582  | 3387  | 3783  | 3485  | 3529  | 3404  | 4270  | 4165  | 4544  | 4584  | 4883  | Taf11   |        |
| Taf12   | 2924  | 2934  | 3203  | 2790  | 2387  | 2568  | 2746  | 1873  | 1753  | 1867  | 1597  | 2181  | 1975  | 2297  | 2740  | 2595  | 3079  | 2494  | 2527  | 2703  | 2599  | 1731  | 1808  | 2038  | 1935  | 2418  | 2135  | 2339  | Taf12   |        |
| Taf13   | 6454  | 6510  | 8553  | 7627  | 5551  | 5938  | 5955  | 4209  | 3206  | 3261  | 3308  | 4122  | 4288  | 4377  | 8231  | 7284  | 7650  | 6691  | 5866  | 7447  | 5813  | 3571  | 3082  | 4073  | 3918  | 4634  | 4647  | 4949  | Taf13   |        |
| Taf15   | 11993 | 12029 | 20764 | 18713 | 14267 | 13860 | 14657 | 12312 | 12706 | 17775 | 16513 | 20783 | 18250 | 21054 | 11257 | 11657 | 19600 | 14915 | 15952 | 13271 | 13659 | 13525 | 12312 | 21467 | 18283 | 26238 | 21264 | 19651 | Taf15   |        |
| Taf1a   | 1835  | 1982  | 1467  | 1977  | 1753  | 1868  | 1847  | 1701  | 1667  | 1586  | 1821  | 1780  | 1814  | 1934  | 1940  | 2038  | 1452  | 1743  | 1612  | 1776  | 1809  | 1678  | 1658  | 1711  | 1801  | 1520  | 1771  | 1701  | Taf1a   |        |
| Taf1b   | 1944  | 1694  | 1723  | 1784  | 1629  | 1797  | 1893  | 2457  | 2169  | 2110  | 1989  | 1967  | 1923  | 2193  | 1884  | 1477  | 1635  | 1521  | 1621  | 2060  | 1905  | 2134  | 2073  | 1964  | 2212  | 2038  | 2131  | 2083  | Taf1b   |        |
| Taf1c   | 1100  | 1589  | 1556  | 1586  | 1389  | 1211  | 1184  | 1138  | 1380  | 1386  | 1197  | 1505  | 1300  | 1428  | 982   | 1431  | 1539  | 1315  | 1581  | 1154  | 1162  | 1268  | 1137  | 1422  | 1414  | 1663  | 1325  | 1307  | Taf1c   |        |
| Taf1d   | 5696  | 4694  | 5434  | 6227  | 4595  | 4712  | 5195  | 5472  | 4636  | 4521  | 5086  | 5226  | 5161  | 6157  | 5654  | 5308  | 5572  | 5461  | 4611  | 5279  | 5190  | 4520  | 4682  | 5305  | 4921  | 5481  | 5535  | 6083  | Taf1d   |        |
| Taf2    | 10049 | 8972  | 8245  | 8415  | 7834  | 8782  | 9036  | 8436  | 7594  | 7238  | 7086  | 8832  | 8122  | 8673  | 9738  | 8874  | 7890  | 8433  | 7667  | 8205  | 8527  | 7439  | 7221  | 7354  | 7593  | 7370  | 8764  | 8624  | Taf2    |        |
| Taf3    | 2618  | 2825  | 3055  | 3414  | 2678  | 2835  | 2759  | 1627  | 1781  | 1984  | 1743  | 2259  | 2017  | 2255  | 2681  | 2755  | 3094  | 2990  | 2915  | 2545  | 2872  | 1878  | 1532  | 2021  | 2029  | 2294  | 2170  | 2277  | Taf3    |        |
| Taf4    | 3524  | 3889  | 4466  | 5113  | 4599  | 4310  | 4812  | 2762  | 2463  | 3431  | 3175  | 3797  | 3062  | 3737  | 3233  | 3678  | 4921  | 4908  | 4599  | 3714  | 4759  | 3367  | 2309  | 3445  | 3565  | 3796  | 3367  | 3533  | Taf4    |        |
| Taf4b   | 873   | 720   | 706   | 549   | 456   | 487   | 510   | 252   | 246   | 212   | 261   | 216   | 340   | 217   | 878   | 910   | 539   | 479   | 404   | 517   | 383   | 307   | 320   | 163   | 195   | 195   | 223   | 233   | Taf4b   |        |
| Taf5    | 2709  | 2299  | 2396  | 2472  | 2225  | 2375  | 2743  | 2268  | 1762  | 1784  | 1759  | 2070  | 1838  | 2286  | 2527  | 2248  | 2449  | 2409  | 2427  | 2408  | 2551  | 2134  | 1735  | 1849  | 2204  | 2234  | 2030  | 2214  | Taf5    |        |
| Taf5l   | 1390  | 1280  | 1113  | 1092  | 991   | 1168  | 976   | 2089  | 2052  | 1838  | 2066  | 2215  | 2118  | 2159  | 1043  | 1146  | 1110  | 1093  | 1107  | 1055  | 1017  | 1724  | 2133  | 2134  | 1862  | 2591  | 2358  | 2222  | Taf5l   |        |
| Taf6    | 6264  | 7573  | 7030  | 6303  | 5118  | 5433  | 5741  | 4584  | 4856  | 4606  | 4321  | 5576  | 4857  | 5286  | 6001  | 6390  | 6672  | 5659  | 6071  | 5873  | 5655  | 4406  | 4552  | 5321  | 4831  | 5843  | 5406  | 5587  | Taf6    |        |
| Taf6l   | 1990  | 2616  | 2329  | 2481  | 1936  | 1989  | 1782  | 1180  | 1341  | 1218  | 1314  | 1460  | 1382  | 1296  | 1925  | 2102  | 2355  | 2360  | 2233  | 1829  | 1821  | 1215  | 1311  | 1331  | 1261  | 1599  | 1443  | 1356  | Taf6l   |        |
| Taf7    | 3652  | 3238  | 3549  | 3383  | 2723  | 2852  | 3375  | 3040  | 2637  | 2360  | 2489  | 3128  | 2578  | 2982  | 3957  | 3537  | 3321  | 3204  | 2840  | 3566  | 2878  | 2369  | 2557  | 2606  | 2492  | 3102  | 2919  | 2893  | Taf7    |        |
| Taf7l   | 14    | 15    | 16    | 15    | 18    | 4     | 4     | 4     | 6     | 9     | 11    | 11    | 2     | 4     | 15    | 18    | 14    | 21    | 5     | 2     | 6     | 10    | 11    | 1     | 4     | 5     | 10    | 1     | Taf7l   |        |
| Taf7l2  | 0     | 0     | 0     | 0     | 0     | 0     | 0     | 0     | 0     | 0     | 0     | 0     | 0     | 0     | 0     | 0     | 1     | 1     | 0     | 3     | 0     | 0     | 2     | 0     | 0     | 0     | 0     | 0     | 2       | Taf7l2 |
| Taf8    | 2052  | 2437  | 2032  | 1985  | 1687  | 1742  | 1619  | 2086  | 2347  | 2223  | 2159  | 2533  | 2435  | 2477  | 1742  | 2008  | 2006  | 1892  | 1842  | 1701  | 1639  | 2117  | 2163  | 2517  | 2084  | 2732  | 2506  | 2453  | Taf8    |        |
| Taf9    | 28    | 10    | 42    | 49    | 17    | 19    | 7     | 10    | 11    | 16    | 13    | 11    | 10    | 29    | 21    | 18    | 28    | 18    | 23    | 38    | 19    | 20    | 12    | 22    | 21    | 16    | 19    | 13    | Taf9    |        |
| Taf9b   | 194   | 160   | 187   | 144   | 241   | 163   | 202   | 926   | 858   | 786   | 843   | 879   | 780   | 861   | 228   | 176   | 162   | 152   | 203   | 214   | 139   | 966   | 858   | 791   | 819   | 1021  | 873   | 985   | Taf9b   |        |
| Taf1a   | 59    | 40    | 77    | 154   | 323   | 185   | 270   | 204   | 248   | 212   | 255   | 61    | 85    | 95    | 83    | 48    | 93    | 210   | 196   | 268   | 337   | 281   | 295   | 129   | 218   | 46    | 83    | 46    | Taf1a   |        |
| Taf2a   | 732   | 760   | 568   | 1096  | 2104  | 1415  | 1512  | 1991  | 1998  | 1985  | 2004  | 1130  | 1370  | 1112  | 1207  | 889   | 1087  | 1473  | 1370  | 1493  | 1639  | 3006  | 2061  | 1410  | 2335  | 930   | 974   | 943   | Taf2a   |        |
| Taf3a   | 24    | 18    | 14    | 13    | 11    | 5     | 7     | 16    | 30    | 17    | 35    | 5     | 18    | 16    | 28    | 17    | 17    | 15    | 10    | 8     | 4     | 20    | 27    | 21    | 20    | 13    | 7     | 9     | Taf3a   |        |
| Taf4a   | 369   | 575   | 604   | 487   | 348   | 368   | 232   | 208   | 124   | 144   | 121   | 167   | 239   | 184   | 563   | 596   | 555   | 393   | 426   | 466   | 369   | 182   | 194   | 156   | 171   | 62    | 248   | 221   | Taf4a   |        |
| Taf5a   | 828   | 1035  | 990   | 1438  | 1924  | 1514  | 1381  | 1706  | 1717  | 2394  | 1719  | 1654  | 1429  | 1525  | 974   | 715   | 1467  | 1376  | 1601  | 1315  | 1532  | 2065  | 1629  | 1815  | 2064  | 1595  | 1304  | 1386  | Taf5a   |        |
| Tagap   | 35    | 29    | 17    | 26    | 21    | 16    | 13    | 53    | 39    | 42    | 40    | 37    | 40    | 28    | 28    | 37    | 31    | 20    | 18    | 20    | 13    | 37    | 52    | 40    | 19    | 35    | 40    | 25    | Tagap   |        |
| Tagap1  | 2158  | 1900  | 1931  | 2006  | 2077  | 2108  | 2095  | 2595  | 2538  | 2375  | 2596  | 2878  | 2637  | 2498  | 2101  | 1729  | 1855  | 1986  | 2220  | 2204  | 1960  | 2508  | 2454  | 2659  | 2574  | 3073  | 2841  | 2611  | Tagap1  |        |
| Tagln   | 1535  | 2219  | 1735  | 744   | 311   | 1008  | 248   | 891   | 1336  | 822   | 1592  | 1851  | 2522  | 1904  | 2097  | 2308  | 1540  | 1102  | 302   | 304   | 247   | 617   | 1783  | 1278  | 870   | 1361  | 2662  | 2294  | Tagln   |        |
| Tagln2  | 2944  | 3234  | 3207  | 2682  | 2610  | 2491  | 2433  | 1898  | 2688  | 2246  | 2942  | 1805  | 2222  | 1727  | 2480  | 3633  | 2636  | 2785  | 2575  | 2721  | 2503  | 1820  | 2855  | 2192  | 2185  | 2372  | 1839  | 1848  | Tagln2  |        |
| Tagln3  | 3300  | 4866  | 3904  | 5221  | 6941  | 6050  | 5972  | 10097 | 9152  | 10053 | 8638  | 10465 | 10075 | 11215 | 4909  | 3674  | 4997  | 5014  | 6524  | 6102  | 6637  | 9434  | 8685  | 10193 | 11471 | 8784  | 10982 | 11163 | Tagln3  |        |
| Tal1    | 843   | 967   | 1943  | 1447  | 1694  | 1580  | 1111  | 2922  | 1790  | 2776  | 2215  | 3347  | 4846  | 3428  | 974   | 805   | 1539  | 1265  | 1819  | 1261  | 1499  | 3763  | 1848  | 2891  | 3320  | 890   | 4195  | 4481  | Tal1    |        |
| Tal2    | 1683  | 1429  | 4001  | 1652  | 1727  | 2020  | 1178  | 4742  | 1795  | 3186  | 2275  | 6680  | 6907  | 7526  | 1762  | 1012  | 2723  | 126   |       |       |       |       |       |       |       |       |       |       |         |        |

|          |       |       |       |       |       |       |       |       |       |       |       |       |       |       |       |       |       |       |       |       |       |       |       |       |       |       |       |       |          |         |
|----------|-------|-------|-------|-------|-------|-------|-------|-------|-------|-------|-------|-------|-------|-------|-------|-------|-------|-------|-------|-------|-------|-------|-------|-------|-------|-------|-------|-------|----------|---------|
| Tas2r143 | 3     | 3     | 1     | 3     | 7     | 6     | 0     | 0     | 1     | 2     | 1     | 3     | 1     | 2     | 7     | 5     | 0     | 0     | 9     | 2     | 4     | 0     | 2     | 1     | 2     | 3     | 0     | 1     | Tas2r143 |         |
| Tasl     | 5     | 6     | 8     | 6     | 3     | 1     | 3     | 1     | 9     | 8     | 8     | 4     | 14    | 9     | 5     | 3     | 1     | 3     | 5     | 4     | 4     | 10    | 16    | 8     | 7     | 4     | 3     | 6     | Tasl     |         |
| Tasor    | 4609  | 3302  | 4669  | 5296  | 5831  | 5964  | 6140  | 8209  | 7047  | 7606  | 8262  | 7580  | 7646  | 7679  | 4759  | 4272  | 4902  | 5290  | 5592  | 5021  | 5695  | 9157  | 7075  | 7549  | 8022  | 5805  | 7649  | 7344  | Tasor    |         |
| Tasor2   | 18453 | 15308 | 10311 | 14130 | 14590 | 17614 | 18338 | 15599 | 13560 | 11513 | 12249 | 12527 | 11911 | 12010 | 18697 | 16787 | 12293 | 14978 | 14018 | 18026 | 16925 | 11817 | 12873 | 10145 | 12104 | 7787  | 13335 | 11689 | Tasor2   |         |
| Tasp1    | 979   | 807   | 794   | 782   | 786   | 694   | 886   | 863   | 768   | 819   | 761   | 755   | 838   | 880   | 794   | 831   | 828   | 758   | 784   | 826   | 678   | 812   | 766   | 722   | 928   | 755   | 871   | Tasp1 |          |         |
| Tat      | 0     | 0     | 0     | 7     | 2     | 0     | 0     | 0     | 2     | 0     | 0     | 0     | 0     | 0     | 0     | 1     | 2     | 0     | 2     | 0     | 0     | 0     | 1     | 1     | 0     | 0     | 0     | 2     | Tat      |         |
| Tatdn1   | 1779  | 1534  | 1644  | 1792  | 1674  | 1654  | 2131  | 1672  | 1497  | 1395  | 1523  | 1628  | 1623  | 1697  | 1937  | 1742  | 1741  | 1690  | 1571  | 1906  | 1805  | 1724  | 1532  | 1602  | 1535  | 1627  | 1617  | 1768  | Tatdn1   |         |
| Tatdn2   | 5236  | 5508  | 3928  | 4677  | 3814  | 4359  | 4217  | 3158  | 2909  | 2670  | 2537  | 2721  | 2578  | 2721  | 5246  | 4625  | 4132  | 4240  | 4328  | 4195  | 4631  | 2811  | 2685  | 2569  | 2678  | 2656  | 2811  | 2940  | Tatdn2   |         |
| Tatdn3   | 444   | 413   | 356   | 395   | 472   | 510   | 352   | 1037  | 952   | 845   | 1085  | 858   | 961   | 879   | 414   | 402   | 340   | 419   | 394   | 481   | 458   | 979   | 970   | 803   | 1029  | 687   | 880   | 853   | Tatdn3   |         |
| Tax1bp1  | 16290 | 14470 | 14844 | 13886 | 13703 | 13911 | 15294 | 14477 | 12660 | 11380 | 11255 | 12643 | 12327 | 12956 | 15208 | 14832 | 13936 | 13868 | 16746 | 14425 | 12616 | 12908 | 12060 | 12091 | 12827 | 12727 | 12938 | 13144 | Tax1bp1  |         |
| Tax1bp3  | 1459  | 1799  | 1770  | 1606  | 1671  | 1787  | 1585  | 2049  | 2267  | 2139  | 2413  | 2284  | 2519  | 2303  | 1454  | 1734  | 1603  | 1629  | 1778  | 1797  | 1591  | 1868  | 2450  | 2355  | 2254  | 2677  | 2508  | 2417  | Tax1bp3  |         |
| Taz      | 3892  | 3915  | 3564  | 3828  | 3557  | 3767  | 3813  | 4154  | 3806  | 3925  | 3958  | 4005  | 3952  | 4043  | 3982  | 3599  | 3783  | 3789  | 3776  | 3774  | 3797  | 4218  | 3959  | 3733  | 4080  | 3522  | 4091  | 3881  | Taz      |         |
| Tbata    | 0     | 1     | 0     | 3     | 9     | 2     | 11    | 6     | 16    | 17    | 16    | 2     | 14    | 13    | 1     | 2     | 1     | 10    | 3     | 8     | 11    | 13    | 10    | 14    | 23    | 9     | 10    | 13    | Tbata    |         |
| Tbcd1    | 6000  | 5789  | 5272  | 5617  | 4928  | 5043  | 4969  | 3156  | 3361  | 3564  | 3681  | 3919  | 3746  | 3755  | 5611  | 6090  | 5366  | 5604  | 5163  | 4580  | 4805  | 3096  | 3245  | 3609  | 3326  | 3998  | 3595  | 3529  | Tbcd1    |         |
| Tbcd10a  | 1105  | 1478  | 1355  | 1409  | 1259  | 1167  | 1029  | 819   | 1094  | 1022  | 1039  | 1014  | 965   | 793   | 1129  | 1347  | 1325  | 1381  | 1374  | 1154  | 1045  | 830   | 1150  | 1008  | 1063  | 1019  | 919   | 840   | Tbcd10a  |         |
| Tbcd10b  | 5530  | 7024  | 7276  | 8748  | 7617  | 7046  | 6968  | 4095  | 4547  | 5381  | 5094  | 5517  | 4787  | 5476  | 5414  | 6135  | 7838  | 8871  | 8489  | 6235  | 7676  | 5287  | 4339  | 5658  | 5475  | 6025  | 4815  | 5305  | Tbcd10b  |         |
| Tbcd10c  | 0     | 0     | 0     | 1     | 0     | 1     | 0     | 0     | 1     | 0     | 2     | 2     | 2     | 0     | 0     | 0     | 0     | 0     | 0     | 0     | 0     | 0     | 0     | 0     | 0     | 0     | 1     | 1     | 1        | Tbcd10c |
| Tbcd12   | 2795  | 2215  | 2564  | 2589  | 3354  | 3122  | 3188  | 2444  | 2176  | 1898  | 1999  | 1837  | 1998  | 1934  | 3187  | 2534  | 2568  | 2861  | 2904  | 3351  | 3135  | 2298  | 2146  | 1751  | 2080  | 1672  | 1771  | 1849  | Tbcd12   |         |
| Tbcd13   | 5900  | 6406  | 5754  | 5968  | 5771  | 5836  | 5863  | 5978  | 6105  | 5936  | 5936  | 6160  | 6036  | 5912  | 5658  | 5217  | 6023  | 5982  | 6420  | 5845  | 5975  | 6589  | 5972  | 6347  | 6132  | 6182  | 6337  | 6051  | Tbcd13   |         |
| Tbcd14   | 8263  | 7713  | 6555  | 8019  | 9102  | 8833  | 9221  | 9056  | 8983  | 8382  | 8105  | 7924  | 7343  | 8202  | 8100  | 6995  | 6719  | 8225  | 8779  | 9256  | 9350  | 8824  | 8385  | 8072  | 9127  | 7349  | 7426  | 7595  | Tbcd14   |         |
| Tbcd15   | 6356  | 4852  | 4726  | 4826  | 3972  | 4717  | 4683  | 4502  | 4036  | 3492  | 4074  | 4001  | 3977  | 4183  | 6215  | 5755  | 4330  | 4940  | 3956  | 5034  | 4450  | 3547  | 4245  | 3684  | 3680  | 4027  | 3979  | 4262  | Tbcd15   |         |
| Tbcd16   | 20612 | 26145 | 30707 | 34002 | 34218 | 30195 | 30412 | 16601 | 18782 | 23600 | 21914 | 23020 | 21175 | 21999 | 20836 | 23294 | 32705 | 34807 | 35714 | 24892 | 33553 | 23277 | 17744 | 20200 | 26902 | 17953 | 20944 | 21981 | Tbcd16   |         |
| Tbcd17   | 2643  | 3530  | 3313  | 4039  | 3729  | 3406  | 3393  | 2201  | 2885  | 2863  | 3084  | 3003  | 2897  | 2700  | 2557  | 3171  | 3592  | 4039  | 4163  | 2749  | 3538  | 3115  | 2847  | 3223  | 3229  | 3016  | 2759  | 2664  | Tbcd17   |         |
| Tbcd19   | 3275  | 3340  | 2685  | 2960  | 3104  | 3275  | 3461  | 4272  | 3569  | 3106  | 3232  | 3249  | 3188  | 3427  | 3705  | 3162  | 2916  | 2801  | 2909  | 3541  | 3416  | 3676  | 3527  | 2945  | 3172  | 2794  | 3402  | 3375  | Tbcd19   |         |
| Tbcd12   | 381   | 496   | 364   | 389   | 380   | 340   | 316   | 133   | 147   | 151   | 150   | 93    | 128   | 99    | 364   | 530   | 385   | 363   | 430   | 300   | 314   | 105   | 186   | 128   | 96    | 103   | 110   | 93    | Tbcd12   |         |
| Tbcd20   | 5944  | 6701  | 5504  | 6187  | 5061  | 5572  | 5633  | 4317  | 4218  | 4065  | 4265  | 3964  | 3961  | 4012  | 5657  | 6245  | 5452  | 5951  | 5220  | 5095  | 5585  | 4286  | 4750  | 4082  | 4128  | 4380  | 4013  | 4321  | Tbcd20   |         |
| Tbcd21   | 0     | 0     | 0     | 0     | 0     | 0     | 0     | 0     | 0     | 0     | 0     | 0     | 0     | 0     | 0     | 1     | 0     | 0     | 0     | 0     | 0     | 0     | 1     | 0     | 0     | 0     | 0     | 0     | 0        | Tbcd21  |
| Tbcd22a  | 806   | 938   | 795   | 858   | 793   | 791   | 628   | 1138  | 1288  | 1051  | 1116  | 1162  | 1165  | 1129  | 839   | 917   | 794   | 866   | 829   | 803   | 707   | 1096  | 1232  | 1015  | 1236  | 1175  | 1168  | 1137  | Tbcd22a  |         |
| Tbcd22b  | 2827  | 3468  | 3829  | 3841  | 3854  | 3362  | 3160  | 2174  | 2589  | 3099  | 2706  | 3182  | 2617  | 2952  | 2672  | 2972  | 3865  | 3787  | 3899  | 2768  | 3578  | 3034  | 2392  | 3101  | 3171  | 3090  | 2658  | 2886  | Tbcd22b  |         |
| Tbcd23   | 6218  | 4992  | 4524  | 4742  | 5036  | 5337  | 5623  | 5577  | 4957  | 4371  | 4784  | 4380  | 4403  | 4738  | 6070  | 5540  | 4266  | 5040  | 4651  | 5605  | 5582  | 4588  | 5071  | 4088  | 4651  | 3879  | 4381  | 4281  | Tbcd23   |         |
| Tbcd24   | 10830 | 11440 | 9024  | 14252 | 14424 | 14087 | 14441 | 6629  | 6409  | 7201  | 6767  | 9028  | 5857  | 5761  | 11646 | 11116 | 11449 | 15436 | 14110 | 12592 | 14949 | 8577  | 6379  | 6154  | 5767  | 3642  | 5449  | 5482  | Tbcd24   |         |
| Tbcd25   | 909   | 1004  | 876   | 1064  | 1050  | 961   | 1027  | 912   | 986   | 966   | 868   | 890   | 822   | 825   | 799   | 950   | 986   | 957   | 1054  | 934   | 1044  | 962   | 903   | 856   | 916   | 824   | 702   | 718   | Tbcd25   |         |
| Tbcd2b   | 6647  | 7014  | 6306  | 5612  | 4604  | 5774  | 4443  | 2926  | 3518  | 3306  | 3856  | 3205  | 3810  | 3014  | 6098  | 7374  | 5295  | 6020  | 4563  | 4054  | 4376  | 2695  | 3860  | 3233  | 2797  | 2921  | 2932  | 3082  | Tbcd2b   |         |
| Tbcd30   | 1328  | 1410  | 1423  | 1957  | 3021  | 2094  | 2501  | 2484  | 2493  | 3082  | 2417  | 1934  | 1836  | 1987  | 1522  | 1312  | 2130  | 2088  | 2490  | 2013  | 2461  | 3425  | 2353  | 2283  | 3030  | 1797  | 1763  | 1641  | Tbcd30   |         |
| Tbcd31   | 6623  | 6284  | 4745  | 5429  | 4147  | 5009  | 5518  | 2550  | 2280  | 1977  | 2208  | 2343  | 2205  | 2503  | 6142  | 5944  | 4675  | 5129  | 4447  | 5593  | 5403  | 1795  | 2174  | 2132  | 2197  | 2252  | 2645  | 2347  | Tbcd31   |         |
| Tbcd32   | 1204  | 940   | 726   | 880   | 884   | 984   | 971   | 1561  | 1561  | 1369  | 1379  | 1357  | 1384  | 1434  | 1142  | 1142  | 812   | 813   | 838   | 950   | 978   | 1414  | 1517  | 1252  | 1295  | 1228  | 1508  | 1308  | Tbcd32   |         |
| Tbcd14   | 1247  | 1087  | 1001  | 1139  | 1546  | 1383  | 1326  | 1617  | 1714  | 1846  | 2113  | 1574  | 1681  | 1421  | 1391  | 1272  | 982   | 1302  | 1336  | 1169  | 1323  | 1703  | 1977  | 1767  | 1779  | 1435  | 1432  | 1335  | Tbcd14   |         |
| Tbcd15   | 1294  | 1221  | 1097  | 1077  | 1193  | 1281  | 1095  | 1758  | 1917  | 1817  | 1944  | 2006  | 1956  | 1807  | 1244  | 1295  | 1099  | 1110  | 1068  | 1054  | 1155  | 1724  | 1827  | 1682  | 1699  | 1741  | 2059  | 2031  | Tbcd15   |         |
| Tbcd17   | 773   | 715   | 652   | 599   | 697   | 703   | 724   | 1569  | 1455  | 1365  | 1297  | 1436  | 1431  | 1450  | 750   | 679   | 659   | 679   | 690   | 871   | 816   | 1482  | 1480  | 1414  | 1590  | 1552  | 1484  | 1654  | Tbcd17   |         |
| Tbcd18   | 1306  | 1544  | 1367  | 1751  | 2214  | 1766  | 1842  | 849   | 1093  | 998   | 1280  | 933   | 845   | 791   | 1395  | 1560  | 1459  | 1999  | 1784  | 1579  | 1977  | 1205  | 1134  | 873   | 1106  | 869   | 830   | 833   | Tbcd18   |         |
| Tbcd8b   | 1878  | 1338  | 1508  | 1282  | 1235  | 1454  | 1431  | 1263  | 1387  | 1062  | 1342  | 1075  | 1086  | 1099  | 1692  | 1518  | 1385  | 1393  | 1381  | 1549  | 1353  | 981   | 1441  | 1064  | 960   | 954   | 1097  | 992   | Tbcd8b   |         |
| Tbcd9    | 4057  | 4317  | 5100  | 5818  | 9247  | 6567  | 7005  | 7624  | 7510  | 9449  | 8133  | 9382  | 8984  | 8818  | 4985  | 4417  | 5935  | 6540  | 7635  | 6314  | 7355  | 10840 | 7809  | 8381  | 10316 | 6738  | 8228  | 8956  | Tbcd9    |         |
| Tbcd9b   | 2623  | 3233  | 3036  | 2854  | 3193  | 3078  | 2553  | 4659  | 5700  | 5729  | 5394  | 5345  | 5393  | 4667  | 2856  | 3293  | 2826  | 2952  | 3120  | 2651  | 2773  | 5521  | 5891  | 5101  | 5223  | 4980  | 4966  | 4616  | Tbcd9b   |         |
| Tbca     | 6834  | 5844  | 6564  | 7009  | 6030  | 5523  | 7774  | 6758  | 5474  | 6715  | 6317  | 5968  | 5460  | 7810  | 7090  | 5050  | 6916  | 6216  | 6216  | 7418  | 7813  | 5419  | 5728  | 6965  | 6427  | 7369  | 6008  | 7725  | Tbca     |         |
| Tbcb     | 4555  | 6357  | 6037  | 6494  | 5999  | 5984  | 5555  | 4205  | 4699  | 5304  | 4837  | 5247  | 5044  | 4983  | 4717  | 5013  | 6186  | 5889  | 6670  | 6600  | 5759  | 4348  | 4691  | 5449  | 5403  | 5689  | 5162  | 5198  | Tbcb     |         |
| Tbcc     | 1237  | 1487  | 1362  | 1440  | 1070  | 1115  | 1155  | 1050  | 1023  | 1143  | 1090  | 1194  | 1127  | 1152  | 1253  | 1209  | 1440  | 1338  | 1308  | 1213  | 1113  | 974   | 1004  | 1192  | 1102  | 1342  | 1260  | 1203  | Tbcc     |         |
| Tbccd1   | 2203  | 2428  | 2010  | 1701  | 1672  | 1776  | 1799  | 1762  | 1771  | 1577  | 1479  | 1674  | 1651  | 1680  | 2201  | 2084  | 1803  | 1931  | 1683  | 2057  | 1776  | 1462  | 1726  | 1576  | 1479  | 1738  | 1713  | 1834  | Tbccd1   |         |
| Tbcd     | 8371  | 8715  | 6707  | 7497  | 7456  | 7910  | 6955  | 5908  |       |       |       |       |       |       |       |       |       |       |       |       |       |       |       |       |       |       |       |       |          |         |

|         |       |       |       |       |       |       |       |       |       |       |       |       |       |       |       |       |       |       |       |       |       |       |       |       |       |       |       |       |
|---------|-------|-------|-------|-------|-------|-------|-------|-------|-------|-------|-------|-------|-------|-------|-------|-------|-------|-------|-------|-------|-------|-------|-------|-------|-------|-------|-------|-------|
| Tcaf2   | 2070  | 2049  | 2034  | 1381  | 1238  | 1381  | 1196  | 666   | 658   | 563   | 864   | 838   | 1009  | 709   | 1994  | 2216  | 1548  | 1301  | 1230  | 1234  | 1113  | 551   | 743   | 533   | 533   | 768   | 897   | 741   |
| Tcaf3   | 0     | 0     | 0     | 0     | 0     | 0     | 0     | 0     | 1     | 0     | 0     | 0     | 0     | 0     | 3     | 0     | 0     | 0     | 0     | 1     | 0     | 0     | 0     | 3     | 0     | 0     | 1     | 0     |
| Tcaim   | 601   | 580   | 659   | 642   | 667   | 666   | 746   | 793   | 754   | 774   | 787   | 744   | 799   | 753   | 597   | 584   | 703   | 648   | 576   | 628   | 700   | 735   | 805   | 816   | 702   | 801   | 794   | 756   |
| Tcam1   | 29    | 23    | 34    | 34    | 16    | 22    | 26    | 40    | 41    | 30    | 41    | 41    | 39    | 20    | 32    | 32    | 27    | 30    | 21    | 23    | 21    | 22    | 23    | 30    | 20    | 38    | 20    | 18    |
| Tcap    | 17    | 35    | 36    | 38    | 28    | 21    | 36    | 18    | 18    | 32    | 78    | 14    | 26    | 23    | 22    | 22    | 46    | 41    | 20    | 20    | 27    | 33    | 67    | 15    | 13    | 24    | 16    | 12    |
| Tcea1   | 8310  | 6125  | 7721  | 7018  | 6686  | 7429  | 8320  | 8485  | 7214  | 7023  | 7025  | 7771  | 7473  | 8010  | 8636  | 7784  | 6934  | 7049  | 7109  | 8113  | 7691  | 7005  | 7767  | 7241  | 7289  | 8540  | 7778  | 8119  |
| Tcea2   | 759   | 733   | 739   | 792   | 1091  | 921   | 999   | 1226  | 1284  | 1215  | 1206  | 1279  | 1156  | 1219  | 762   | 703   | 765   | 813   | 1116  | 955   | 932   | 1450  | 1243  | 1340  | 1440  | 1205  | 1121  | 1099  |
| Tcea3   | 239   | 268   | 285   | 203   | 152   | 176   | 91    | 83    | 157   | 120   | 208   | 108   | 163   | 100   | 290   | 361   | 248   | 212   | 126   | 126   | 88    | 145   | 231   | 120   | 117   | 114   | 98    | 115   |
| Tceal1  | 693   | 574   | 649   | 516   | 818   | 711   | 876   | 1503  | 1228  | 1163  | 1179  | 1239  | 1196  | 1296  | 748   | 570   | 692   | 602   | 868   | 983   | 894   | 1312  | 1290  | 1232  | 1195  | 1239  | 1247  | 1365  |
| Tceal3  | 1419  | 1876  | 2212  | 2097  | 2215  | 1938  | 2219  | 1269  | 1386  | 1647  | 1729  | 1351  | 1430  | 1652  | 1662  | 1494  | 2285  | 2071  | 2282  | 2035  | 2110  | 1519  | 1431  | 1597  | 1794  | 1373  | 1293  | 1335  |
| Tceal5  | 1113  | 1321  | 1513  | 1862  | 1699  | 1538  | 1867  | 613   | 658   | 1079  | 984   | 647   | 652   | 805   | 1222  | 1186  | 1563  | 1655  | 1592  | 1573  | 1818  | 697   | 795   | 868   | 918   | 694   | 558   | 689   |
| Tceal6  | 886   | 1053  | 1096  | 1346  | 1412  | 1238  | 1544  | 498   | 579   | 811   | 808   | 414   | 445   | 554   | 886   | 738   | 1358  | 1368  | 1288  | 1271  | 1581  | 585   | 649   | 668   | 720   | 366   | 413   | 415   |
| Tceal7  | 27    | 10    | 23    | 9     | 35    | 23    | 23    | 101   | 122   | 47    | 1268  | 51    | 36    | 50    | 33    | 29    | 28    | 22    | 24    | 25    | 24    | 104   | 733   | 43    | 45    | 30    | 19    | 42    |
| Tceal8  | 4403  | 3472  | 4170  | 3491  | 3713  | 3680  | 4139  | 6589  | 5835  | 5158  | 6019  | 5474  | 6090  | 6346  | 4894  | 3874  | 3992  | 3323  | 3960  | 5049  | 3770  | 5419  | 6226  | 5709  | 5100  | 6606  | 6272  | 6572  |
| Tceal9  | 14497 | 11317 | 14138 | 11832 | 10604 | 11409 | 13914 | 14566 | 13185 | 11344 | 13029 | 13159 | 15833 | 14944 | 12428 | 13201 | 11244 | 11561 | 15019 | 12684 | 11165 | 13925 | 14461 | 12069 | 16282 | 13476 | 15974 | 15974 |
| Tceanc  | 871   | 615   | 826   | 674   | 622   | 660   | 715   | 938   | 817   | 829   | 910   | 1111  | 976   | 1018  | 874   | 727   | 862   | 627   | 616   | 694   | 651   | 856   | 858   | 924   | 918   | 1187  | 1044  | 1067  |
| Tceanc2 | 1765  | 1831  | 1728  | 2073  | 2125  | 1818  | 2239  | 2417  | 2402  | 2488  | 2540  | 2168  | 2189  | 2330  | 1679  | 1712  | 1852  | 2035  | 2144  | 1950  | 2195  | 2237  | 2178  | 2397  | 2533  | 2062  | 2214  | 2281  |
| Tcearg1 | 13027 | 10146 | 13370 | 12776 | 13543 | 13858 | 15051 | 13982 | 13273 | 14521 | 14011 | 17040 | 15957 | 18023 | 12575 | 10970 | 12918 | 12367 | 13869 | 12157 | 14174 | 14616 | 12096 | 15547 | 15527 | 17105 | 16819 | 17912 |
| Tcearg2 | 178   | 244   | 336   | 369   | 721   | 352   | 374   | 453   | 470   | 689   | 825   | 381   | 475   | 386   | 287   | 301   | 381   | 390   | 447   | 361   | 446   | 872   | 559   | 507   | 620   | 260   | 285   | 385   |
| Tcf11   | 28575 | 26325 | 24878 | 20777 | 19811 | 22318 | 19263 | 30283 | 26097 | 23840 | 23890 | 27953 | 30620 | 27939 | 29700 | 27452 | 22907 | 19201 | 19387 | 22922 | 19477 | 23788 | 26240 | 23556 | 22389 | 25059 | 31403 | 30495 |
| Tcf15   | 209   | 214   | 189   | 229   | 114   | 126   | 142   | 37    | 44    | 67    | 70    | 48    | 90    | 48    | 179   | 220   | 209   | 149   | 141   | 104   | 121   | 53    | 54    | 54    | 66    | 82    | 45    | 46    |
| Tcf19   | 5182  | 6030  | 4943  | 4629  | 3229  | 3839  | 4377  | 1713  | 1991  | 1466  | 1678  | 2284  | 1810  | 2255  | 4725  | 5060  | 4792  | 4566  | 3939  | 4370  | 3970  | 1145  | 1769  | 1926  | 1761  | 2671  | 2264  | 2273  |
| Tcf20   | 13321 | 12781 | 10414 | 13185 | 12724 | 13630 | 14142 | 10723 | 10645 | 11197 | 10454 | 10812 | 9965  | 11364 | 12443 | 11597 | 11906 | 13193 | 12669 | 12753 | 14178 | 10301 | 9655  | 10979 | 12286 | 7818  | 10537 | 10567 |
| Tcf21   | 8     | 7     | 3     | 6     | 11    | 0     | 0     | 5     | 7     | 7     | 44    | 2     | 9     | 2     | 1     | 9     | 0     | 7     | 0     | 2     | 2     | 17    | 17    | 1     | 4     | 8     | 0     | 0     |
| Tcf23   | 0     | 4     | 0     | 4     | 2     | 1     | 0     | 0     | 0     | 2     | 5     | 1     | 1     | 0     | 0     | 0     | 0     | 4     | 2     | 0     | 3     | 2     | 0     | 0     | 0     | 0     | 0     | 0     |
| Tcf24   | 120   | 234   | 148   | 186   | 236   | 225   | 105   | 221   | 142   | 144   | 430   | 18    | 269   | 21    | 303   | 360   | 181   | 205   | 104   | 83    | 103   | 227   | 271   | 25    | 120   | 39    | 22    | 15    |
| Tcf25   | 14391 | 16795 | 14365 | 15778 | 18216 | 16427 | 17273 | 16972 | 18280 | 17497 | 17162 | 16944 | 16827 | 16842 | 15008 | 14239 | 15811 | 16143 | 17585 | 16626 | 17451 | 18489 | 17968 | 17441 | 18613 | 16229 | 16719 | 16770 |
| Tcf3    | 7934  | 9400  | 10400 | 8454  | 7668  | 7441  | 6436  | 9377  | 11533 | 11559 | 11093 | 15140 | 12919 | 12888 | 6782  | 8073  | 9895  | 7535  | 8757  | 6782  | 6693  | 9301  | 10459 | 13776 | 13335 | 18115 | 13672 | 13283 |
| Tcf4    | 17553 | 12847 | 14955 | 19851 | 21122 | 22565 | 24913 | 28953 | 31087 | 30492 | 29468 | 28932 | 28210 | 30087 | 16905 | 15400 | 16886 | 19070 | 21990 | 22118 | 23455 | 23688 | 29627 | 32766 | 34447 | 27984 | 26005 | 26366 |
| Tcf7    | 2102  | 2128  | 3259  | 2144  | 1773  | 1788  | 1630  | 651   | 601   | 710   | 727   | 841   | 773   | 692   | 1787  | 2408  | 2367  | 2053  | 1974  | 1570  | 1763  | 708   | 727   | 748   | 701   | 819   | 737   | 806   |
| Tcf711  | 2482  | 2932  | 3220  | 2770  | 1906  | 2087  | 1635  | 1914  | 2634  | 2477  | 2767  | 2842  | 2460  | 2374  | 2076  | 2927  | 3011  | 2617  | 2360  | 1591  | 1738  | 1875  | 2448  | 3236  | 1938  | 4056  | 2331  | 2315  |
| Tcf712  | 3405  | 3312  | 8814  | 6638  | 7130  | 6601  | 9598  | 8802  | 4296  | 12508 | 9460  | 16989 | 8873  | 17954 | 3700  | 2446  | 7225  | 7009  | 9593  | 5689  | 9472  | 18098 | 6551  | 18460 | 17305 | 14981 | 16426 | 19504 |
| Tcf15   | 431   | 429   | 447   | 351   | 365   | 334   | 349   | 85    | 115   | 85    | 121   | 68    | 88    | 49    | 373   | 469   | 323   | 385   | 289   | 365   | 300   | 104   | 102   | 67    | 87    | 60    | 63    | 62    |
| Tchh    | 399   | 328   | 545   | 443   | 402   | 495   | 450   | 81    | 122   | 125   | 157   | 114   | 178   | 132   | 386   | 353   | 518   | 385   | 422   | 422   | 448   | 109   | 141   | 146   | 131   | 92    | 145   | 171   |
| Tchp    | 2952  | 3871  | 3885  | 4385  | 3361  | 3443  | 3481  | 1697  | 1832  | 2315  | 2113  | 2467  | 2346  | 2683  | 2946  | 3530  | 4062  | 4127  | 3519  | 2971  | 3544  | 2050  | 1672  | 2512  | 2284  | 2631  | 2694  | 2595  |
| Tcim    | 1111  | 821   | 819   | 699   | 671   | 617   | 684   | 749   | 852   | 762   | 891   | 501   | 643   | 531   | 804   | 1101  | 687   | 643   | 506   | 638   | 628   | 565   | 995   | 769   | 560   | 886   | 435   | 441   |
| Tcigr1  | 2531  | 2707  | 2321  | 1790  | 1666  | 1728  | 1300  | 1130  | 1498  | 1358  | 1768  | 1152  | 1410  | 979   | 1928  | 3232  | 2079  | 2250  | 1528  | 1455  | 1348  | 1258  | 1630  | 1316  | 1088  | 1349  | 1074  | 1021  |
| Tcl1    | 0     | 0     | 0     | 0     | 0     | 0     | 0     | 0     | 0     | 0     | 0     | 0     | 1     | 0     | 0     | 0     | 0     | 0     | 0     | 0     | 0     | 0     | 0     | 0     | 0     | 0     | 0     | 0     |
| Tcl1b1  | 0     | 2     | 0     | 14    | 0     | 1     | 4     | 0     | 0     | 0     | 0     | 4     | 1     | 0     | 1     | 3     | 0     | 2     | 1     | 4     | 4     | 2     | 0     | 0     | 1     | 0     | 5     | 0     |
| Tcl1b2  | 10    | 9     | 1     | 2     | 3     | 1     | 7     | 1     | 2     | 0     | 0     | 1     | 2     | 0     | 4     | 5     | 5     | 7     | 0     | 6     | 8     | 0     | 1     | 1     | 1     | 4     | 2     | 0     |
| Tcl1b3  | 0     | 0     | 0     | 0     | 0     | 0     | 0     | 0     | 0     | 0     | 0     | 0     | 0     | 0     | 0     | 0     | 0     | 0     | 0     | 0     | 0     | 0     | 0     | 0     | 0     | 0     | 0     | 0     |
| Tcl1b5  | 0     | 0     | 0     | 1     | 0     | 0     | 0     | 0     | 0     | 0     | 0     | 0     | 0     | 0     | 0     | 0     | 0     | 0     | 0     | 0     | 0     | 0     | 0     | 0     | 0     | 0     | 0     | 0     |
| Tcn2    | 2204  | 2663  | 2211  | 1862  | 1777  | 1941  | 1551  | 1342  | 1789  | 1461  | 1654  | 1437  | 1906  | 1408  | 2167  | 2774  | 1895  | 1951  | 1764  | 1842  | 1522  | 1489  | 2047  | 1325  | 1208  | 1526  | 1590  | 1542  |
| Tcof1   | 4142  | 5325  | 7039  | 5644  | 4403  | 4466  | 3932  | 3315  | 4649  | 5358  | 4999  | 6347  | 5096  | 5590  | 3861  | 5101  | 6522  | 5519  | 5374  | 3699  | 4104  | 4299  | 4434  | 5859  | 4781  | 7451  | 5252  | 5447  |
| Tcp     | 37272 | 34007 | 32226 | 28508 | 26716 | 28261 | 32551 | 38085 | 32180 | 28350 | 27948 | 34132 | 32241 | 34327 | 39146 | 33370 | 31283 | 27927 | 29828 | 34672 | 30789 | 30338 | 31844 | 30841 | 29552 | 39281 | 35705 | 37676 |
| Tcp10a  | 30    | 33    | 22    | 40    | 32    | 54    | 61    | 0     | 5     | 1     | 3     | 1     | 1     | 34    | 30    | 27    | 55    | 40    | 27    | 47    | 2     | 5     | 1     | 8     | 0     | 2     | 0     | 0     |
| Tcp10b  | 53    | 47    | 60    | 90    | 51    | 47    | 66    | 5     | 6     | 10    | 19    | 3     | 14    | 1     | 57    | 41    | 61    | 62    | 38    | 30    | 59    | 22    | 10    | 4     | 8     | 8     | 7     | 2     |
| Tcp10c  | 2     | 2     | 0     | 2     | 2     | 0     | 2     | 5     | 7     | 3     | 0     | 0     | 0     | 0     | 4     | 2     | 1     | 4     | 1     | 2     | 1     | 0     | 1     | 0     | 5     | 0     | 0     | 1     |
| Tcp11   | 315   | 400   | 476   | 458   | 424   | 374   | 336   | 93    | 85    | 125   | 111   | 121   | 126   | 114   | 306   | 423   | 438   | 478   | 450   | 331   | 384   | 95    | 117   | 127   | 109   | 112   | 95    | 107   |
| Tcp111  | 1651  | 1676  | 846   | 1014  | 1327  | 1784  | 1306  | 2245  | 2217  | 1769  | 1966  | 1565  | 1616  | 1722  | 1577  | 1561  | 1041  | 1136  | 1082  | 1615  | 1595  | 1424  | 1906  | 1369  | 1875  | 1070  | 1809  | 1575  |
| Tcp112  | 3156  | 3632  | 2636  | 3425  | 3131  | 2914  | 3390  | 1171  | 1151  | 1066  | 1187  | 783   | 1275  | 907   | 3239  | 3119  | 3023  | 3451  | 3003  | 3079  | 3394  | 1260  | 1257  | 986   | 1030  | 750   | 918   | 964   |
| Tcp11x2 | 0     | 0     | 0     | 0     | 0     | 2     | 0     | 0     | 0     | 1     | 0     |       |       |       |       |       |       |       |       |       |       |       |       |       |       |       |       |       |



|         |       |       |       |       |       |       |       |       |       |       |       |       |       |       |       |       |       |       |       |       |       |       |       |       |       |       |       |       |         |
|---------|-------|-------|-------|-------|-------|-------|-------|-------|-------|-------|-------|-------|-------|-------|-------|-------|-------|-------|-------|-------|-------|-------|-------|-------|-------|-------|-------|-------|---------|
| Tecr    | 13025 | 18307 | 15543 | 16112 | 15234 | 13535 | 15292 | 12863 | 13621 | 13725 | 11988 | 13059 | 13041 | 13917 | 13872 | 14109 | 16048 | 15311 | 16506 | 15234 | 16100 | 13164 | 13470 | 13255 | 13212 | 14246 | 13132 | 14310 | Tecr    |
| Tecrl   | 5     | 2     | 0     | 4     | 4     | 8     | 3     | 13    | 41    | 16    | 129   | 16    | 17    | 11    | 8     | 5     | 0     | 2     | 2     | 3     | 0     | 47    | 97    | 11    | 11    | 18    | 23    | 23    | Tecrl   |
| Tecta   | 91    | 124   | 62    | 149   | 99    | 100   | 73    | 125   | 198   | 283   | 423   | 99    | 206   | 56    | 105   | 160   | 70    | 119   | 69    | 90    | 86    | 222   | 189   | 87    | 101   | 82    | 113   | 74    | Tecta   |
| Tectb   | 5     | 18    | 6     | 11    | 2     | 6     | 7     | 13    | 14    | 55    | 94    | 18    | 14    | 9     | 13    | 4     | 12    | 12    | 2     | 15    | 5     | 48    | 16    | 19    | 20    | 12    | 8     | 20    | Tectb   |
| Tedc1   | 3742  | 4504  | 4135  | 3940  | 2960  | 3014  | 3152  | 1500  | 1767  | 1617  | 1765  | 2414  | 2265  | 2107  | 3228  | 4034  | 3712  | 3593  | 3325  | 2810  | 3047  | 1377  | 1596  | 2175  | 1678  | 3073  | 2401  | 2500  | Tedc1   |
| Tedc2   | 2119  | 2560  | 2314  | 2166  | 1624  | 1742  | 1831  | 1235  | 1367  | 1349  | 1390  | 1603  | 1505  | 1653  | 1982  | 2263  | 2314  | 2093  | 1852  | 1991  | 1834  | 1176  | 1286  | 1555  | 1370  | 1882  | 1693  | 1823  | Tedc2   |
| Teddm1b | 0     | 0     | 0     | 0     | 0     | 0     | 0     | 0     | 1     | 0     | 0     | 0     | 1     | 0     | 0     | 0     | 0     | 3     | 0     | 0     | 0     | 0     | 2     | 0     | 2     | 0     | 0     | 0     | Teddm1b |
| Teddm2  | 36    | 22    | 20    | 27    | 38    | 29    | 42    | 48    | 66    | 94    | 50    | 56    | 49    | 63    | 29    | 23    | 48    | 35    | 48    | 41    | 47    | 57    | 78    | 77    | 78    | 60    | 41    | 45    | Teddm2  |
| Teddm3  | 0     | 0     | 0     | 0     | 0     | 0     | 0     | 0     | 0     | 0     | 0     | 0     | 0     | 0     | 0     | 0     | 0     | 0     | 0     | 0     | 0     | 0     | 1     | 0     | 0     | 0     | 0     | 0     | Teddm3  |
| Tef     | 6023  | 5810  | 4563  | 6341  | 5221  | 6099  | 5850  | 3998  | 4395  | 4217  | 4605  | 4167  | 4011  | 4148  | 5641  | 5689  | 5278  | 6214  | 5612  | 5264  | 5784  | 4406  | 4526  | 4108  | 4536  | 3522  | 4043  | 3993  | Tef     |
| Tefm    | 486   | 434   | 639   | 476   | 461   | 377   | 497   | 742   | 819   | 612   | 688   | 836   | 765   | 749   | 522   | 470   | 502   | 437   | 444   | 577   | 467   | 638   | 805   | 748   | 689   | 911   | 754   | 932   | Tefm    |
| Tek     | 1129  | 1064  | 1195  | 1036  | 1190  | 1166  | 1184  | 1594  | 1641  | 1719  | 1975  | 1611  | 1930  | 1761  | 1222  | 1283  | 962   | 1143  | 959   | 1271  | 1097  | 1800  | 2276  | 1678  | 1731  | 1710  | 1683  | 1622  | Tek     |
| Tekt1   | 437   | 458   | 268   | 382   | 384   | 361   | 449   | 341   | 306   | 267   | 275   | 320   | 306   | 274   | 439   | 460   | 438   | 388   | 407   | 448   | 421   | 274   | 328   | 260   | 269   | 292   | 223   | 205   | Tekt1   |
| Tekt2   | 298   | 353   | 287   | 428   | 366   | 365   | 346   | 394   | 551   | 559   | 591   | 437   | 485   | 386   | 276   | 365   | 364   | 484   | 330   | 270   | 340   | 398   | 539   | 589   | 444   | 565   | 363   | 418   | Tekt2   |
| Tekt3   | 2     | 0     | 6     | 3     | 0     | 1     | 0     | 0     | 2     | 0     | 0     | 0     | 1     | 0     | 0     | 9     | 1     | 0     | 0     | 0     | 1     | 2     | 0     | 0     | 0     | 0     | 0     | 0     | Tekt3   |
| Tekt4   | 8     | 22    | 15    | 22    | 29    | 28    | 18    | 37    | 40    | 22    | 33    | 56    | 49    | 21    | 18    | 31    | 17    | 11    | 16    | 28    | 22    | 42    | 52    | 21    | 26    | 25    | 23    | 20    | Tekt4   |
| Tekt5   | 7     | 16    | 13    | 6     | 24    | 13    | 20    | 31    | 41    | 63    | 38    | 9     | 17    | 15    | 17    | 9     | 19    | 23    | 19    | 21    | 18    | 67    | 48    | 26    | 33    | 24    | 10    | 14    | Tekt5   |
| Telo2   | 2310  | 2746  | 2488  | 2743  | 2787  | 2739  | 2584  | 2809  | 3234  | 3347  | 3304  | 3522  | 3185  | 3179  | 2041  | 2459  | 2787  | 2894  | 2899  | 2436  | 2634  | 3228  | 2995  | 3402  | 3521  | 3243  | 3550  | 3275  | Telo2   |
| Ten1    | 475   | 614   | 551   | 479   | 605   | 567   | 592   | 1005  | 1116  | 1084  | 1088  | 1132  | 1144  | 1108  | 553   | 477   | 525   | 591   | 634   | 605   | 588   | 973   | 1149  | 1184  | 1212  | 1191  | 1120  | 1175  | Ten1    |
| Tenm1   | 1412  | 1228  | 581   | 1682  | 2557  | 2751  | 2794  | 3116  | 2740  | 2249  | 2068  | 1798  | 1280  | 1521  | 1578  | 1002  | 1088  | 1797  | 1960  | 3276  | 3013  | 2438  | 2163  | 1336  | 2516  | 594   | 1386  | 1210  | Tenm1   |
| Tenm2   | 2647  | 3514  | 3768  | 7121  | 9259  | 7780  | 7164  | 4601  | 5080  | 7712  | 5600  | 5311  | 5914  | 5006  | 3737  | 3527  | 5080  | 7980  | 8391  | 6156  | 8693  | 8338  | 5299  | 5927  | 8688  | 2361  | 4883  | 4663  | Tenm2   |
| Tenm3   | 15282 | 17467 | 11451 | 13880 | 14857 | 17426 | 12855 | 14309 | 15489 | 17167 | 19147 | 17217 | 20248 | 16274 | 16192 | 19260 | 12173 | 15610 | 13560 | 12294 | 14589 | 14472 | 16333 | 13643 | 16067 | 8548  | 19496 | 16738 | Tenm3   |
| Tenm4   | 12064 | 11961 | 10591 | 14949 | 15652 | 15570 | 16025 | 10147 | 12344 | 14049 | 13142 | 15363 | 14914 | 13640 | 10578 | 14545 | 12222 | 15940 | 16988 | 13670 | 16938 | 11645 | 10861 | 12814 | 15939 | 10387 | 13364 | 13766 | Tenm4   |
| Tent2   | 5356  | 3835  | 4671  | 3935  | 4033  | 4826  | 4914  | 5159  | 4820  | 4193  | 4597  | 5182  | 5042  | 5095  | 5325  | 4467  | 4040  | 3925  | 4215  | 4507  | 4631  | 4933  | 5082  | 4579  | 4389  | 5401  | 5254  | 5312  | Tent2   |
| Tent4a  | 3182  | 3763  | 4067  | 4376  | 4193  | 3967  | 3803  | 2933  | 3266  | 3715  | 3418  | 3807  | 3442  | 3601  | 3082  | 3592  | 4153  | 4417  | 4443  | 3462  | 4019  | 3688  | 2974  | 3558  | 3833  | 3836  | 3270  | 3715  | Tent4a  |
| Tent4b  | 8778  | 8073  | 9300  | 11103 | 9986  | 10133 | 11001 | 5307  | 4433  | 5115  | 5180  | 5397  | 5180  | 5364  | 9634  | 8792  | 10013 | 11101 | 10369 | 9605  | 11113 | 5706  | 4457  | 5202  | 5472  | 5213  | 5417  | 5458  | Tent4b  |
| Tent5a  | 1509  | 1422  | 1577  | 1435  | 1317  | 1395  | 1172  | 1489  | 1611  | 1598  | 2480  | 1506  | 1878  | 1483  | 1585  | 1653  | 1487  | 1578  | 1084  | 1151  | 1182  | 2134  | 2232  | 1540  | 1595  | 1184  | 1945  | 1742  | Tent5a  |
| Tent5b  | 286   | 374   | 357   | 301   | 155   | 215   | 121   | 24    | 38    | 41    | 35    | 25    | 31    | 27    | 268   | 434   | 262   | 229   | 175   | 131   | 118   | 32    | 67    | 32    | 19    | 41    | 31    | 27    | Tent5b  |
| Tent5c  | 2224  | 2515  | 2134  | 1842  | 1136  | 1330  | 1330  | 879   | 1190  | 936   | 783   | 1245  | 3472  | 1444  | 2483  | 2337  | 1863  | 1615  | 1455  | 1724  | 1318  | 702   | 1348  | 873   | 856   | 1143  | 1589  | 2410  | Tent5c  |
| Tent5d  | 37    | 9     | 3     | 2     | 7     | 3     | 4     | 12    | 11    | 9     | 1     | 9     | 8     | 6     | 13    | 16    | 5     | 11    | 0     | 13    | 2     | 3     | 10    | 11    | 1     | 5     | 3     | 5     | Tent5d  |
| Tep1    | 596   | 693   | 637   | 620   | 565   | 629   | 390   | 902   | 1093  | 1101  | 1182  | 1206  | 1322  | 1103  | 585   | 819   | 537   | 519   | 535   | 436   | 497   | 983   | 1191  | 913   | 921   | 729   | 1185  | 1060  | Tep1    |
| Tepp    | 30    | 48    | 39    | 39    | 51    | 42    | 44    | 15    | 21    | 38    | 24    | 10    | 23    | 14    | 49    | 39    | 32    | 24    | 41    | 29    | 35    | 32    | 39    | 22    | 13    | 14    | 9     | 18    | Tepp    |
| Tepsin  | 1617  | 2419  | 2204  | 2193  | 1991  | 1873  | 1939  | 1165  | 1439  | 1406  | 1481  | 1574  | 1378  | 1503  | 1478  | 1998  | 2342  | 2114  | 2205  | 1736  | 1762  | 1335  | 1364  | 1581  | 1498  | 1736  | 1539  | 1351  | Tepsin  |
| Terb1   | 76    | 67    | 79    | 104   | 133   | 114   | 96    | 67    | 55    | 41    | 57    | 21    | 69    | 27    | 107   | 107   | 101   | 109   | 111   | 110   | 103   | 42    | 52    | 38    | 58    | 31    | 29    | 44    | Terb1   |
| Terb2   | 0     | 0     | 0     | 0     | 0     | 0     | 0     | 0     | 0     | 0     | 0     | 0     | 0     | 0     | 0     | 0     | 0     | 0     | 0     | 0     | 0     | 0     | 2     | 0     | 0     | 0     | 0     | 1     | Terb2   |
| Terf1   | 1709  | 1370  | 1851  | 1591  | 1256  | 1332  | 1429  | 1892  | 1589  | 1731  | 1658  | 2056  | 1827  | 2207  | 1673  | 1453  | 1700  | 1330  | 1503  | 1531  | 1376  | 1445  | 1573  | 2019  | 1586  | 2508  | 2049  | 2134  | Terf1   |
| Terf2   | 3999  | 4242  | 5297  | 5181  | 4978  | 4513  | 5161  | 4368  | 4581  | 5243  | 4716  | 5279  | 4698  | 5565  | 4155  | 4218  | 5159  | 5229  | 5381  | 4444  | 5244  | 5307  | 4390  | 5426  | 5323  | 5560  | 4706  | 5212  | Terf2   |
| Terf2ip | 4736  | 5135  | 5320  | 6244  | 5546  | 5229  | 5850  | 3330  | 3185  | 3596  | 3237  | 3697  | 3598  | 3758  | 4845  | 4937  | 5650  | 6029  | 5670  | 5175  | 6042  | 4017  | 3124  | 3880  | 3848  | 3825  | 3335  | 3760  | Terf2ip |
| Tert    | 976   | 1052  | 800   | 906   | 1024  | 892   | 836   | 1662  | 1740  | 1690  | 1373  | 1606  | 1673  | 1553  | 742   | 1016  | 841   | 863   | 934   | 824   | 745   | 1733  | 1608  | 1685  | 1644  | 1128  | 1692  | 1444  | Tert    |
| Tes     | 5913  | 4374  | 4045  | 3266  | 3121  | 3023  | 2407  | 3449  | 3503  | 2840  | 3174  | 2028  | 3114  | 2134  | 5069  | 6124  | 3365  | 3252  | 2493  | 2991  | 2498  | 2672  | 3728  | 2524  | 2162  | 2608  | 2120  | 2302  | Tes     |
| Tes3-ps | 180   | 82    | 95    | 155   | 155   | 144   | 152   | 188   | 93    | 109   | 90    | 99    | 117   | 104   | 195   | 125   | 148   | 179   | 142   | 159   | 135   | 155   | 106   | 95    | 97    | 120   | 116   | 129   | Tes3-ps |
| Tesc    | 203   | 263   | 175   | 293   | 281   | 202   | 259   | 103   | 69    | 180   | 77    | 50    | 66    | 31    | 183   | 199   | 249   | 262   | 288   | 225   | 277   | 40    | 150   | 154   | 48    | 166   | 19    | 32    | Tesc    |
| Tesc1   | 1     | 2     | 0     | 0     | 2     | 2     | 0     | 1     | 1     | 0     | 0     | 0     | 0     | 1     | 4     | 1     | 7     | 1     | 0     | 0     | 4     | 2     | 3     | 2     | 1     | 3     | 0     | 0     | Tesc1   |
| Tesk1   | 2625  | 3302  | 2865  | 3438  | 3697  | 3084  | 2996  | 3284  | 3810  | 4260  | 3730  | 3913  | 3212  | 3384  | 2288  | 2763  | 3574  | 3358  | 3890  | 2809  | 3202  | 4293  | 3545  | 4244  | 4280  | 4135  | 3263  | 3292  | Tesk1   |
| Tesk2   | 1538  | 1373  | 1419  | 1386  | 976   | 1083  | 1217  | 455   | 420   | 449   | 451   | 513   | 442   | 498   | 1415  | 1376  | 1358  | 1302  | 1066  | 1110  | 1172  | 428   | 462   | 534   | 379   | 546   | 488   | 520   | Tesk2   |
| Tesl1   | 0     | 1     | 0     | 0     | 0     | 0     | 2     | 0     | 0     | 0     | 2     | 0     | 1     | 1     | 1     | 1     | 0     | 0     | 0     | 0     | 0     | 0     | 2     | 2     | 4     | 0     | 3     | 0     | Tesl1   |
| Tesmin  | 16    | 25    | 30    | 39    | 22    | 26    | 13    | 27    | 29    | 38    | 36    | 16    | 26    | 32    | 20    | 37    | 22    | 44    | 42    | 21    | 27    | 35    | 30    | 19    | 23    | 23    | 28    | 26    | Tesmin  |
| Tespa1  | 13    | 6     | 2     | 3     | 2     | 3     | 0     | 5     | 8     | 8     | 14    | 3     | 17    | 4     | 7     | 7     | 8     | 2     | 2     | 5     | 4     | 2     | 16    | 4     | 0     | 9     | 8     | 4     | Tespa1  |
| Tet1    | 4525  | 4164  | 3375  | 3561  | 3117  | 4697  | 4123  | 4956  | 4666  | 3947  | 4017  | 3908  | 3901  | 4202  | 4560  | 4464  | 3311  | 3382  | 3529  | 4546  | 4333  | 3801  | 4295  | 3341  | 4348  | 3201  | 4172  | 3622  | Tet1    |
| Tet2    | 5855  | 4776  | 3862  | 4942  | 5926  | 6579  | 5832  | 8267  | 7212  | 6842  | 7504  | 7848  | 7606  | 7960  | 5687  | 4625  | 4244  | 4840  | 5438  | 6056  | 6197  | 7060  | 6724  | 6595  | 7873  | 4799  | 8020  | 7168  | Tet2    |
| Tet3    | 6785  | 6985  | 9174  | 10701 | 11343 | 9910  | 9865  | 9677  | 10877 | 13495 |       |       |       |       |       |       |       |       |       |       |       |       |       |       |       |       |       |       |         |

|         |       |       |       |       |       |       |       |       |       |       |       |       |       |       |        |       |       |       |       |       |       |       |       |       |       |       |       |       |         |
|---------|-------|-------|-------|-------|-------|-------|-------|-------|-------|-------|-------|-------|-------|-------|--------|-------|-------|-------|-------|-------|-------|-------|-------|-------|-------|-------|-------|-------|---------|
| Tex45   | 42    | 59    | 28    | 73    | 44    | 60    | 34    | 9     | 5     | 14    | 10    | 8     | 7     | 6     | 46     | 44    | 59    | 61    | 55    | 41    | 46    | 12    | 6     | 8     | 5     | 11    | 3     | 12    | Tex45   |
| Tex46   | 0     | 0     | 0     | 0     | 0     | 0     | 0     | 0     | 0     | 0     | 1     | 0     | 0     | 1     | 0      | 0     | 0     | 2     | 0     | 0     | 0     | 0     | 1     | 0     | 0     | 0     | 0     | 0     | Tex46   |
| Tex48   | 0     | 0     | 0     | 0     | 0     | 0     | 0     | 1     | 0     | 0     | 0     | 0     | 0     | 4     | 0      | 0     | 0     | 0     | 0     | 1     | 0     | 0     | 0     | 0     | 0     | 0     | 0     | 0     | Tex48   |
| Tex49   | 6     | 7     | 0     | 1     | 6     | 0     | 1     | 5     | 0     | 3     | 2     | 4     | 2     | 1     | 1      | 2     | 0     | 0     | 0     | 5     | 3     | 0     | 2     | 3     | 2     | 6     | 0     | 4     | Tex49   |
| Tex50   | 3     | 11    | 2     | 8     | 6     | 4     | 13    | 1     | 2     | 3     | 0     | 0     | 1     | 0     | 5      | 5     | 16    | 11    | 11    | 0     | 11    | 2     | 1     | 0     | 0     | 2     | 1     | Tex50 |         |
| Tex52   | 130   | 156   | 108   | 129   | 80    | 90    | 135   | 116   | 111   | 109   | 78    | 104   | 91    | 100   | 96     | 129   | 132   | 110   | 136   | 103   | 115   | 79    | 68    | 160   | 99    | 114   | 122   | 90    | Tex52   |
| Tex55   | 0     | 0     | 0     | 0     | 0     | 0     | 0     | 0     | 0     | 0     | 0     | 0     | 0     | 0     | 0      | 0     | 0     | 0     | 0     | 0     | 0     | 0     | 1     | 0     | 0     | 0     | 0     | 0     | Tex55   |
| Tex9    | 7448  | 6081  | 6146  | 6314  | 5863  | 6635  | 7004  | 4098  | 3699  | 3993  | 3485  | 4964  | 4765  | 5373  | 7481   | 6143  | 6205  | 5832  | 6022  | 7203  | 6786  | 3618  | 3452  | 4022  | 4091  | 4400  | 5194  | 5001  | Tex9    |
| Tfam    | 4832  | 4251  | 4589  | 4496  | 4015  | 4062  | 4578  | 4588  | 4177  | 4053  | 4000  | 4759  | 4465  | 4776  | 4963   | 4575  | 4524  | 4182  | 4274  | 4708  | 4137  | 3957  | 4073  | 4474  | 4355  | 5560  | 4944  | 5122  | Tfam    |
| Tfap2a  | 529   | 496   | 642   | 845   | 1240  | 945   | 305   | 1287  | 1358  | 1837  | 1385  | 745   | 1892  | 761   | 637    | 734   | 816   | 840   | 662   | 506   | 400   | 1910  | 1440  | 1031  | 1297  | 671   | 648   | 858   | Tfap2a  |
| Tfap2b  | 2353  | 2185  | 2821  | 4362  | 6442  | 5448  | 3831  | 9685  | 7237  | 13113 | 9693  | 9827  | 16491 | 11018 | 2843   | 2923  | 4341  | 4092  | 6072  | 4194  | 5228  | 15014 | 8166  | 13196 | 12972 | 4657  | 9298  | 11364 | Tfap2b  |
| Tfap2c  | 1209  | 1142  | 1251  | 1296  | 1064  | 1170  | 1580  | 1097  | 1270  | 1237  | 795   | 1731  | 925   | 1705  | 811    | 756   | 1257  | 1214  | 1570  | 1434  | 1404  | 451   | 916   | 1668  | 1622  | 2142  | 4119  | 1459  | Tfap2c  |
| Tfap2d  | 145   | 155   | 368   | 180   | 357   | 316   | 260   | 909   | 487   | 919   | 544   | 1085  | 1000  | 1107  | 178    | 101   | 305   | 222   | 493   | 382   | 434   | 1118  | 674   | 1142  | 1091  | 237   | 1275  | 1291  | Tfap2d  |
| Tfap2e  | 60    | 67    | 207   | 167   | 177   | 122   | 152   | 106   | 106   | 157   | 110   | 323   | 277   | 221   | 88     | 59    | 189   | 140   | 199   | 139   | 140   | 137   | 110   | 279   | 189   | 116   | 198   | 272   | Tfap2e  |
| Tfap4   | 514   | 470   | 800   | 607   | 628   | 524   | 620   | 744   | 911   | 1024  | 955   | 1207  | 956   | 1231  | 423    | 500   | 721   | 534   | 637   | 481   | 535   | 566   | 852   | 1213  | 1044  | 1530  | 940   | 1240  | Tfap4   |
| Tfb1m   | 827   | 808   | 794   | 679   | 519   | 529   | 659   | 894   | 818   | 745   | 782   | 809   | 809   | 850   | 881    | 777   | 713   | 615   | 582   | 630   | 622   | 668   | 827   | 733   | 701   | 902   | 891   | 930   | Tfb1m   |
| Tfb2m   | 2135  | 1836  | 1711  | 1874  | 1706  | 1748  | 1925  | 1906  | 1702  | 1532  | 1593  | 1693  | 1616  | 1609  | 2194   | 2125  | 1662  | 1935  | 1760  | 2067  | 1913  | 1589  | 1753  | 1521  | 1622  | 1755  | 1723  | 1640  | Tfb2m   |
| Tfcp2   | 3886  | 4050  | 4287  | 4894  | 4574  | 4320  | 4727  | 3406  | 3216  | 3870  | 3680  | 3696  | 3745  | 3859  | 3909   | 3971  | 4749  | 4529  | 4275  | 4083  | 4589  | 3811  | 3122  | 3676  | 3672  | 3477  | 3941  | 3919  | Tfcp2   |
| Tfcp2l1 | 811   | 733   | 559   | 618   | 531   | 539   | 532   | 114   | 153   | 102   | 155   | 100   | 102   | 67    | 723    | 797   | 547   | 600   | 473   | 530   | 533   | 102   | 159   | 86    | 114   | 52    | 84    | 62    | Tfcp2l1 |
| Tfcp2l1 | 11197 | 11576 | 12381 | 11195 | 10286 | 10544 | 12421 | 7608  | 9860  | 9263  | 9448  | 11898 | 10468 | 12610 | 10941  | 10609 | 12393 | 10939 | 11274 | 11148 | 11540 | 8482  | 9453  | 11324 | 10497 | 13964 | 12163 | 13118 | Tfcp2l1 |
| Tfcp2l2 | 11114 | 9772  | 9268  | 8816  | 8746  | 9595  | 9934  | 8172  | 6336  | 6225  | 5720  | 9533  | 9349  | 9488  | 10572  | 9851  | 9010  | 8389  | 9199  | 9669  | 9904  | 6644  | 6357  | 6853  | 7295  | 6124  | 11579 | 10551 | Tfcp2l2 |
| Tfcp2l3 | 4601  | 5228  | 5139  | 5627  | 4971  | 4826  | 4863  | 2258  | 2275  | 2718  | 2553  | 2986  | 2819  | 2997  | 4356   | 4555  | 5284  | 5213  | 5183  | 3869  | 4970  | 2682  | 2375  | 2796  | 2639  | 2864  | 2829  | 3012  | Tfcp2l3 |
| Tfeb    | 621   | 837   | 785   | 746   | 547   | 663   | 476   | 123   | 200   | 149   | 199   | 108   | 163   | 94    | 541    | 787   | 871   | 723   | 628   | 455   | 507   | 127   | 190   | 152   | 154   | 185   | 132   | 104   | Tfeb    |
| Tfec    | 23    | 14    | 36    | 8     | 16    | 23    | 11    | 48    | 54    | 42    | 69    | 62    | 66    | 60    | 25     | 23    | 20    | 13    | 12    | 16    | 15    | 45    | 90    | 39    | 54    | 72    | 60    | 61    | Tfec    |
| Tff2    | 0     | 0     | 0     | 0     | 0     | 0     | 0     | 0     | 0     | 3     | 0     | 0     | 0     | 1     | 0      | 1     | 0     | 0     | 0     | 0     | 0     | 0     | 0     | 0     | 0     | 0     | 0     | 0     | Tff2    |
| Tff3    | 3     | 4     | 5     | 9     | 12    | 5     | 2     | 9     | 0     | 14    | 8     | 13    | 7     | 10    | 3      | 0     | 0     | 4     | 9     | 1     | 3     | 2     | 11    | 2     | 1     | 19    | 9     | 13    | Tff3    |
| Tfg     | 6867  | 7042  | 7396  | 6428  | 6677  | 6377  | 7012  | 7590  | 6637  | 6668  | 6621  | 7875  | 7334  | 8193  | 7681   | 6390  | 6886  | 6325  | 6773  | 7084  | 6660  | 7132  | 6829  | 7302  | 7175  | 8444  | 8007  | 8572  | Tfg     |
| Tfip11  | 4197  | 5288  | 5231  | 4991  | 4044  | 4198  | 3952  | 2743  | 3783  | 3920  | 3683  | 4452  | 4115  | 3989  | 3779   | 4825  | 5131  | 4593  | 4381  | 3604  | 3936  | 3638  | 3397  | 4149  | 4245  | 4851  | 4188  | 4206  | Tfip11  |
| Tfip1   | 1751  | 1327  | 1764  | 1250  | 1279  | 1596  | 1124  | 1407  | 1807  | 1485  | 2348  | 1312  | 1712  | 1421  | 1871   | 2088  | 1311  | 1630  | 992   | 1475  | 1182  | 1753  | 2539  | 1448  | 1454  | 1527  | 1648  | 1524  | Tfip1   |
| Tfip2   | 35    | 14    | 27    | 17    | 12    | 31    | 10    | 39    | 36    | 22    | 54    | 36    | 19    | 33    | 40     | 19    | 13    | 20    | 9     | 9     | 13    | 28    | 55    | 20    | 18    | 46    | 23    | 39    | Tfip2   |
| Tfip2   | 1082  | 1158  | 1201  | 1181  | 1208  | 1194  | 1095  | 912   | 928   | 1142  | 1170  | 1152  | 1173  | 1327  | 994    | 935   | 1239  | 1069  | 1153  | 1169  | 1168  | 961   | 1024  | 1273  | 1156  | 1295  | 1120  | 1270  | Tfip2   |
| Tfip2   | 401   | 650   | 464   | 987   | 989   | 875   | 726   | 178   | 220   | 267   | 181   | 252   | 271   | 244   | 468    | 529   | 863   | 1073  | 994   | 754   | 861   | 302   | 175   | 207   | 286   | 112   | 205   | 190   | Tfip2   |
| Tfip2   | 18089 | 13757 | 12261 | 12806 | 13044 | 16524 | 16568 | 14691 | 11491 | 8986  | 9964  | 12527 | 11989 | 13529 | 19043  | 15535 | 11148 | 12834 | 13150 | 20750 | 15579 | 12089 | 11437 | 9105  | 13340 | 10665 | 13619 | 13011 | Tfip2   |
| Tg      | 21    | 15    | 13    | 18    | 18    | 22    | 10    | 26    | 47    | 31    | 52    | 24    | 56    | 30    | 37     | 47    | 19    | 32    | 15    | 12    | 13    | 47    | 59    | 16    | 33    | 8     | 69    | 32    | Tg      |
| Tgds    | 2287  | 2252  | 2207  | 2059  | 1610  | 1932  | 1863  | 1895  | 1886  | 1494  | 1921  | 1782  | 1723  | 1645  | 2232   | 2411  | 2051  | 1976  | 1748  | 2073  | 1769  | 1564  | 1855  | 1690  | 1581  | 1896  | 1807  | 1726  | Tgds    |
| Tgfa    | 589   | 428   | 493   | 583   | 1114  | 806   | 838   | 539   | 743   | 991   | 925   | 461   | 371   | 487   | 514    | 502   | 657   | 738   | 786   | 678   | 770   | 847   | 628   | 695   | 783   | 518   | 342   | 395   | Tgfa    |
| Tgfb1   | 340   | 445   | 464   | 385   | 343   | 371   | 241   | 348   | 462   | 461   | 511   | 405   | 526   | 353   | 342    | 440   | 396   | 452   | 340   | 229   | 294   | 436   | 514   | 436   | 385   | 561   | 370   | 310   | Tgfb1   |
| Tgfb1l1 | 570   | 817   | 764   | 372   | 405   | 597   | 274   | 1083  | 1502  | 1407  | 1870  | 1643  | 2124  | 1496  | 604    | 904   | 508   | 529   | 367   | 297   | 296   | 1365  | 1935  | 1481  | 1332  | 1774  | 1811  | 1697  | Tgfb1l1 |
| Tgfb2   | 1558  | 1194  | 1541  | 1370  | 1109  | 1382  | 1065  | 2898  | 3165  | 3650  | 5032  | 2295  | 4017  | 2376  | 1547   | 1760  | 1256  | 1335  | 1002  | 942   | 1079  | 2837  | 3834  | 3470  | 2025  | 3909  | 2377  | 2433  | Tgfb2   |
| Tgfb3   | 947   | 824   | 940   | 773   | 595   | 819   | 447   | 1111  | 1809  | 1691  | 2841  | 1037  | 1354  | 1007  | 845    | 1144  | 876   | 884   | 563   | 346   | 420   | 1611  | 2264  | 1443  | 1193  | 1338  | 1159  | 927   | Tgfb3   |
| Tgfb3   | 3876  | 3736  | 3263  | 1955  | 1140  | 1662  | 650   | 2354  | 3539  | 3099  | 6445  | 2368  | 4338  | 2239  | 3349   | 6011  | 2114  | 2113  | 719   | 557   | 571   | 3278  | 4125  | 3027  | 2046  | 5048  | 2651  | 2549  | Tgfb3   |
| Tgfb3   | 24646 | 18749 | 20308 | 19951 | 17692 | 19618 | 20227 | 19974 | 15045 | 14563 | 14737 | 19788 | 19415 | 19674 | 25293  | 22171 | 20065 | 18899 | 17809 | 20050 | 19420 | 16688 | 14922 | 16175 | 15702 | 18139 | 21783 | 20939 | Tgfb3   |
| Tgfb3   | 1374  | 1195  | 1307  | 976   | 970   | 1304  | 732   | 2177  | 3301  | 2792  | 4062  | 2263  | 2724  | 1976  | 1294   | 1487  | 1101  | 1267  | 908   | 842   | 756   | 2811  | 4237  | 2555  | 2429  | 2389  | 2404  | 1968  | Tgfb3   |
| Tgfb3   | 1460  | 1188  | 1493  | 737   | 832   | 920   | 503   | 953   | 1609  | 1084  | 1761  | 1008  | 1372  | 858   | 1234   | 1748  | 973   | 1040  | 550   | 533   | 608   | 1089  | 1906  | 999   | 812   | 830   | 973   | 1002  | Tgfb3   |
| Tgfb3l1 | 235   | 228   | 317   | 355   | 421   | 380   | 387   | 413   | 432   | 534   | 491   | 506   | 438   | 554   | 273    | 219   | 319   | 392   | 341   | 304   | 323   | 528   | 397   | 575   | 524   | 549   | 533   | 492   | Tgfb3l1 |
| Tgfb3l1 | 3329  | 3778  | 3080  | 4196  | 4427  | 4267  | 4124  | 3705  | 3920  | 4608  | 4475  | 4550  | 4230  | 4445  | 3672   | 3547  | 4020  | 4422  | 4383  | 3917  | 4338  | 4250  | 3836  | 4359  | 4672  | 3487  | 4091  | 4186  | Tgfb3l1 |
| Tgfi1   | 2360  | 2116  | 2798  | 1847  | 1540  | 1517  | 1574  | 1951  | 1788  | 1756  | 1923  | 1947  | 2682  | 2068  | 2193   | 2493  | 2428  | 1687  | 1630  | 1534  | 1589  | 1442  | 2186  | 2082  | 1391  | 2644  | 2198  | 2451  | Tgfi1   |
| Tgfi2   | 3931  | 4563  | 4896  | 4352  | 3385  | 3644  | 3695  | 4364  | 4478  | 4430  | 4418  | 6006  | 5148  | 5426  | 3603   | 4253  | 4580  | 4101  | 4195  | 3290  | 3751  | 3728  | 4335  | 5352  | 4816  | 7177  | 5675  | 5770  | Tgfi2   |
| Tgm1    | 58    | 57    | 25    | 27    | 34    | 58    | 28    | 85    | 130   | 36    | 63    | 47    | 67    | 42    | 49     | 83    | 35    | 54    | 26    | 30    | 35    | 32    | 135   | 38    | 23    | 28    | 51    | 74    | Tgm1    |
| Tgm2    | 963   | 1234  | 1256  | 1021  | 1168  | 1205  | 673   | 1158  | 1729  | 1598  | 1834  | 1224  | 1419  | 1017  | 1069</ |       |       |       |       |       |       |       |       |       |       |       |       |       |         |



|         |       |       |       |       |       |       |       |       |       |       |       |       |       |       |       |       |       |       |       |       |       |       |       |       |       |       |       |       |         |
|---------|-------|-------|-------|-------|-------|-------|-------|-------|-------|-------|-------|-------|-------|-------|-------|-------|-------|-------|-------|-------|-------|-------|-------|-------|-------|-------|-------|-------|---------|
| Tjp3    | 397   | 417   | 471   | 475   | 356   | 287   | 337   | 299   | 362   | 455   | 291   | 354   | 263   | 321   | 326   | 296   | 466   | 375   | 441   | 345   | 345   | 251   | 358   | 564   | 317   | 546   | 298   | 314   | Tjp3    |
| Tk1     | 1390  | 1399  | 1422  | 1142  | 961   | 1207  | 1161  | 2241  | 2843  | 2318  | 2447  | 3780  | 3103  | 3382  | 1160  | 1079  | 1285  | 991   | 1287  | 1350  | 1063  | 1465  | 2420  | 3202  | 2633  | 4048  | 3690  | 3408  | Tk1     |
| Tk2     | 2649  | 2930  | 2827  | 3213  | 2860  | 2882  | 3062  | 1754  | 1949  | 2080  | 1867  | 2112  | 1977  | 2291  | 2720  | 2021  | 3057  | 2978  | 2950  | 2573  | 3194  | 2008  | 1838  | 2002  | 2325  | 2130  | 2022  | 2277  | Tk2     |
| Tkfc    | 1538  | 1838  | 1840  | 1670  | 1724  | 1680  | 1665  | 1787  | 2181  | 2049  | 2351  | 2640  | 2232  | 2698  | 1458  | 1543  | 1877  | 1728  | 2001  | 1647  | 1791  | 2152  | 1952  | 2498  | 2322  | 2950  | 2454  | 2608  | Tkfc    |
| Tkt     | 12204 | 15426 | 12625 | 12582 | 11608 | 12540 | 11500 | 9594  | 12397 | 11702 | 10345 | 12640 | 11644 | 11481 | 10843 | 15279 | 12974 | 11793 | 14138 | 12332 | 12289 | 8995  | 11941 | 12636 | 11883 | 12525 | 12477 | 12708 | Tkt     |
| Tkt1    | 1     | 0     | 1     | 2     | 0     | 0     | 1     | 2     | 0     | 3     | 0     | 1     | 0     | 0     | 0     | 1     | 0     | 0     | 0     | 2     | 0     | 0     | 0     | 0     | 0     | 0     | 3     | 0     | Tkt1    |
| Tkt2    | 1     | 6     | 8     | 8     | 7     | 31    | 12    | 1     | 4     | 5     | 3     | 0     | 3     | 1     | 5     | 1     | 5     | 4     | 6     | 2     | 4     | 3     | 3     | 2     | 2     | 0     | 1     | 0     | Tkt2    |
| Tlcd1   | 1017  | 983   | 963   | 1080  | 780   | 844   | 872   | 427   | 430   | 434   | 487   | 479   | 378   | 565   | 919   | 931   | 1140  | 968   | 837   | 781   | 924   | 416   | 515   | 429   | 361   | 550   | 438   | 418   | Tlcd1   |
| Tlcd2   | 180   | 124   | 180   | 92    | 61    | 115   | 61    | 203   | 294   | 232   | 264   | 210   | 235   | 152   | 104   | 172   | 97    | 103   | 70    | 54    | 61    | 159   | 323   | 213   | 131   | 290   | 188   | 163   | Tlcd2   |
| Tlcd3a  | 2261  | 2243  | 2229  | 1914  | 1962  | 1979  | 1901  | 1542  | 1504  | 1612  | 1523  | 1549  | 1614  | 1569  | 2178  | 2284  | 2103  | 1952  | 2060  | 1950  | 1966  | 1734  | 1504  | 1430  | 1669  | 1688  | 1608  | 1717  | Tlcd3a  |
| Tlcd3b  | 2187  | 3446  | 3502  | 5534  | 7113  | 5403  | 5634  | 4395  | 4869  | 6397  | 5259  | 5143  | 4583  | 5317  | 2652  | 2401  | 4985  | 5690  | 7097  | 4673  | 6347  | 7595  | 4281  | 6136  | 6988  | 4539  | 4465  | 4719  | Tlcd3b  |
| Tlcd4   | 738   | 500   | 511   | 623   | 696   | 728   | 808   | 655   | 590   | 489   | 561   | 556   | 284   | 524   | 804   | 501   | 627   | 638   | 809   | 923   | 832   | 466   | 482   | 499   | 616   | 416   | 413   | 519   | Tlcd4   |
| Tlcd5   | 3096  | 2794  | 3301  | 3136  | 2908  | 3032  | 3245  | 2032  | 1902  | 2012  | 1963  | 2268  | 2189  | 2518  | 3154  | 2805  | 3060  | 3042  | 2862  | 2847  | 3136  | 2386  | 1869  | 2080  | 2256  | 2147  | 2187  | 2244  | Tlcd5   |
| Tlde2   | 7     | 10    | 17    | 5     | 4     | 0     | 6     | 7     | 3     | 9     | 3     | 5     | 8     | 12    | 7     | 4     | 8     | 14    | 19    | 5     | 5     | 3     | 2     | 4     | 10    | 8     | 3     | 4     | Tlde2   |
| Tle1    | 4854  | 5275  | 5413  | 5770  | 5900  | 5222  | 5273  | 7132  | 6757  | 7069  | 6463  | 7557  | 6361  | 7244  | 5118  | 4925  | 5769  | 5668  | 6010  | 5376  | 5253  | 7424  | 6590  | 7170  | 7489  | 8031  | 6563  | 7153  | Tle1    |
| Tle2    | 1835  | 1942  | 2083  | 2411  | 2388  | 2145  | 1743  | 1789  | 2581  | 3014  | 3375  | 2002  | 2301  | 1570  | 1538  | 2100  | 2344  | 2663  | 2233  | 1671  | 2087  | 2861  | 2363  | 2761  | 2450  | 1975  | 1897  | 1587  | Tle2    |
| Tle3    | 5914  | 7882  | 10194 | 9742  | 7706  | 6542  | 6450  | 7461  | 8361  | 9967  | 8984  | 11773 | 10210 | 11106 | 5636  | 7026  | 10004 | 8776  | 8259  | 5516  | 7363  | 8863  | 7274  | 12223 | 10165 | 11065 | 11168 | 11330 | Tle3    |
| Tle4    | 6729  | 6536  | 6906  | 7850  | 8102  | 7016  | 8113  | 7493  | 7016  | 7008  | 6616  | 8569  | 7165  | 8307  | 6752  | 6631  | 7463  | 7674  | 7850  | 7077  | 7822  | 8858  | 6064  | 7546  | 8045  | 7671  | 7527  | 8441  | Tle4    |
| Tle5    | 9926  | 12228 | 11979 | 11825 | 11512 | 10789 | 9686  | 10864 | 12349 | 14323 | 13246 | 13786 | 12513 | 13091 | 9432  | 9189  | 12266 | 11548 | 12320 | 10366 | 10135 | 12078 | 12124 | 14978 | 13732 | 15430 | 13269 | 12914 | Tle5    |
| Tle6    | 178   | 202   | 178   | 192   | 151   | 171   | 93    | 134   | 190   | 147   | 218   | 117   | 161   | 88    | 146   | 236   | 212   | 172   | 150   | 132   | 107   | 160   | 200   | 159   | 155   | 162   | 137   | 127   | Tle6    |
| Tle7    | 0     | 0     | 3     | 0     | 1     | 0     | 0     | 0     | 0     | 0     | 0     | 0     | 1     | 0     | 0     | 2     | 1     | 0     | 0     | 1     | 2     | 0     | 0     | 0     | 0     | 0     | 0     | 0     | Tle7    |
| Tlk1    | 6226  | 4722  | 6049  | 5861  | 7081  | 6574  | 7315  | 8816  | 8062  | 8342  | 8397  | 10207 | 9554  | 10099 | 6179  | 5156  | 6302  | 5815  | 6894  | 6341  | 6902  | 9225  | 7627  | 8673  | 8881  | 10025 | 9862  | 10118 | Tlk1    |
| Tlk2    | 5171  | 4706  | 5343  | 4766  | 5146  | 4974  | 5291  | 8074  | 6913  | 6465  | 6535  | 7300  | 7017  | 7828  | 5596  | 4394  | 5217  | 4525  | 5336  | 5281  | 5138  | 7195  | 6528  | 6981  | 6981  | 7687  | 7649  | 7988  | Tlk2    |
| Tll1    | 248   | 174   | 209   | 203   | 281   | 278   | 255   | 468   | 442   | 489   | 632   | 307   | 327   | 307   | 202   | 212   | 233   | 210   | 233   | 244   | 229   | 543   | 637   | 356   | 446   | 258   | 321   | 253   | Tll1    |
| Tll2    | 193   | 298   | 243   | 281   | 347   | 271   | 292   | 200   | 225   | 205   | 270   | 238   | 212   | 196   | 255   | 262   | 258   | 398   | 334   | 242   | 378   | 307   | 263   | 250   | 311   | 133   | 255   | 171   | Tll2    |
| Tln1    | 11674 | 12610 | 9963  | 8924  | 7198  | 8692  | 5530  | 8679  | 12216 | 11054 | 12839 | 10396 | 12875 | 9449  | 10028 | 15193 | 8869  | 9453  | 7143  | 5825  | 6325  | 9431  | 13221 | 10811 | 9265  | 8143  | 11073 | 9808  | Tln1    |
| Tln2    | 6508  | 6532  | 4517  | 4825  | 5221  | 5145  | 4072  | 4557  | 6039  | 5130  | 6854  | 4535  | 5988  | 4146  | 5879  | 7547  | 4177  | 5478  | 4163  | 3937  | 4514  | 4924  | 6376  | 3839  | 4765  | 3212  | 5348  | 4311  | Tln2    |
| Tlnrd1  | 2222  | 2167  | 2118  | 1847  | 1969  | 1813  | 1455  | 1936  | 2063  | 1997  | 2307  | 2066  | 2303  | 1861  | 1792  | 2230  | 2110  | 1784  | 1969  | 1558  | 1661  | 2097  | 2054  | 2074  | 1824  | 2433  | 1981  | 1880  | Tlnrd1  |
| Tlr1    | 17    | 16    | 15    | 3     | 21    | 13    | 20    | 56    | 57    | 67    | 85    | 73    | 40    | 48    | 17    | 16    | 13    | 15    | 12    | 22    | 16    | 75    | 81    | 62    | 57    | 69    | 64    | 47    | Tlr1    |
| Tlr11   | 0     | 0     | 0     | 0     | 0     | 0     | 0     | 0     | 0     | 2     | 1     | 0     | 0     | 0     | 0     | 0     | 0     | 0     | 0     | 0     | 0     | 0     | 2     | 3     | 0     | 0     | 0     | 0     | Tlr11   |
| Tlr12   | 44    | 65    | 83    | 71    | 100   | 71    | 99    | 99    | 91    | 176   | 124   | 151   | 110   | 136   | 51    | 54    | 109   | 90    | 129   | 70    | 109   | 152   | 108   | 172   | 159   | 169   | 89    | 97    | Tlr12   |
| Tlr13   | 25    | 34    | 22    | 16    | 24    | 25    | 21    | 64    | 99    | 49    | 87    | 60    | 65    | 52    | 32    | 32    | 9     | 42    | 30    | 31    | 24    | 58    | 102   | 68    | 48    | 59    | 43    | 59    | Tlr13   |
| Tlr2    | 316   | 218   | 262   | 164   | 160   | 208   | 139   | 192   | 199   | 189   | 234   | 74    | 147   | 80    | 231   | 292   | 166   | 200   | 159   | 141   | 137   | 132   | 230   | 113   | 124   | 125   | 126   | 81    | Tlr2    |
| Tlr3    | 149   | 100   | 119   | 80    | 149   | 122   | 129   | 212   | 208   | 225   | 200   | 229   | 188   | 219   | 104   | 101   | 109   | 106   | 118   | 131   | 121   | 289   | 217   | 224   | 185   | 211   | 241   | 179   | Tlr3    |
| Tlr4    | 165   | 103   | 89    | 81    | 126   | 115   | 82    | 156   | 158   | 145   | 189   | 131   | 161   | 134   | 141   | 199   | 85    | 87    | 84    | 143   | 107   | 165   | 225   | 104   | 151   | 113   | 143   | 103   | Tlr4    |
| Tlr5    | 205   | 212   | 121   | 129   | 118   | 166   | 101   | 83    | 148   | 117   | 148   | 98    | 166   | 87    | 239   | 247   | 105   | 171   | 85    | 95    | 86    | 134   | 199   | 80    | 88    | 57    | 110   | 103   | Tlr5    |
| Tlr6    | 47    | 42    | 73    | 41    | 20    | 33    | 11    | 38    | 91    | 60    | 104   | 76    | 109   | 86    | 44    | 80    | 37    | 34    | 31    | 30    | 11    | 62    | 114   | 80    | 78    | 71    | 81    | 69    | Tlr6    |
| Tlr7    | 30    | 25    | 39    | 17    | 30    | 35    | 35    | 116   | 104   | 117   | 166   | 108   | 94    | 103   | 49    | 52    | 44    | 29    | 24    | 50    | 31    | 127   | 175   | 115   | 83    | 91    | 130   | 115   | Tlr7    |
| Tlr8    | 9     | 9     | 9     | 6     | 7     | 17    | 7     | 31    | 41    | 29    | 45    | 18    | 22    | 21    | 22    | 15    | 9     | 14    | 12    | 25    | 10    | 45    | 59    | 17    | 20    | 30    | 17    | 21    | Tlr8    |
| Tlr9    | 6     | 8     | 5     | 4     | 11    | 16    | 2     | 15    | 26    | 19    | 43    | 22    | 19    | 26    | 11    | 11    | 8     | 14    | 3     | 9     | 12    | 23    | 34    | 20    | 28    | 12    | 21    | 19    | Tlr9    |
| Tlx1    | 23    | 96    | 15    | 23    | 100   | 65    | 1     | 137   | 133   | 137   | 138   | 17    | 356   | 18    | 165   | 147   | 44    | 77    | 6     | 4     | 4     | 177   | 118   | 9     | 50    | 4     | 17    | 11    | Tlx1    |
| Tlx2    | 37    | 60    | 6     | 1     | 74    | 4     | 0     | 110   | 89    | 56    | 88    | 0     | 110   | 2     | 59    | 83    | 19    | 33    | 0     | 1     | 1     | 105   | 66    | 2     | 37    | 4     | 0     | 0     | Tlx2    |
| Tlx3    | 52    | 117   | 89    | 75    | 249   | 73    | 34    | 134   | 132   | 205   | 297   | 26    | 244   | 26    | 107   | 147   | 138   | 92    | 68    | 65    | 27    | 184   | 189   | 23    | 98    | 1     | 27    | 19    | Tlx3    |
| Tm2d1   | 950   | 660   | 963   | 948   | 1161  | 1038  | 1161  | 1773  | 1431  | 1413  | 1459  | 1478  | 1505  | 1757  | 998   | 854   | 931   | 921   | 1086  | 1218  | 1170  | 1644  | 1592  | 1584  | 1555  | 1552  | 1599  | 1546  | Tm2d1   |
| Tm2d2   | 3623  | 4251  | 2976  | 3442  | 3066  | 3181  | 3264  | 2595  | 2377  | 1979  | 2083  | 2178  | 2359  | 2299  | 3574  | 3556  | 3191  | 3601  | 3324  | 3754  | 3363  | 2187  | 2330  | 2250  | 2210  | 2400  | 2264  | 2275  | Tm2d2   |
| Tm2d3   | 1019  | 1373  | 1130  | 1186  | 1078  | 1172  | 1117  | 1205  | 1279  | 1111  | 1128  | 1234  | 1085  | 1083  | 1106  | 1234  | 1138  | 1106  | 1133  | 1284  | 1020  | 1155  | 1303  | 1172  | 1239  | 1265  | 1220  | 1095  | Tm2d3   |
| Tm4sf1  | 300   | 215   | 302   | 194   | 300   | 321   | 187   | 592   | 723   | 568   | 760   | 487   | 807   | 378   | 355   | 323   | 286   | 305   | 241   | 301   | 228   | 643   | 1042  | 554   | 599   | 502   | 773   | 528   | Tm4sf1  |
| Tm4sf19 | 7     | 8     | 8     | 12    | 12    | 18    | 15    | 11    | 14    | 6     | 4     | 8     | 9     | 7     | 13    | 15    | 5     | 14    | 12    | 14    | 11    | 10    | 3     | 2     | 9     | 7     | 8     | 5     | Tm4sf19 |
| Tm4sf20 | 0     | 0     | 0     | 0     | 1     | 0     | 0     | 0     | 0     | 0     | 0     | 0     | 0     | 0     | 0     | 0     | 0     | 0     | 0     | 0     | 0     | 0     | 0     | 0     | 0     | 0     | 0     | 0     | Tm4sf20 |
| Tm4sf4  | 0     | 1     | 0     | 0     | 3     | 0     | 1     | 1     | 4     | 3     | 5     | 2     | 0     | 0     | 1     | 1     | 7     | 0     | 4     | 0     | 3     | 2     | 3     | 5     | 1     | 0     | 0     | 1     | Tm4sf4  |
| Tm4sf5  | 7     | 5     | 0     | 2     | 10    | 10    | 6     | 2     | 7     | 2     | 3     | 5     | 15    | 3     | 4     | 3     | 6     | 4     | 4     | 5     | 4     | 13    | 8     | 5     | 6     | 8     | 16    | 5     | Tm4sf5  |
| Tm6sf1  | 797   | 732   | 765   |       |       |       |       |       |       |       |       |       |       |       |       |       |       |       |       |       |       |       |       |       |       |       |       |       |         |



|          |       |       |       |       |       |       |       |       |       |       |       |       |       |       |       |       |       |       |       |       |       |       |       |       |       |       |       |          |          |        |
|----------|-------|-------|-------|-------|-------|-------|-------|-------|-------|-------|-------|-------|-------|-------|-------|-------|-------|-------|-------|-------|-------|-------|-------|-------|-------|-------|-------|----------|----------|--------|
| Tmco3    | 2586  | 2962  | 2424  | 2662  | 2980  | 3004  | 2751  | 2732  | 2792  | 2592  | 2814  | 2357  | 2719  | 2551  | 2651  | 2962  | 2468  | 2732  | 2890  | 2758  | 2888  | 2592  | 2896  | 2592  | 2575  | 2355  | 2613  | 2591     | Tmco3    |        |
| Tmco4    | 46    | 45    | 59    | 53    | 55    | 43    | 18    | 93    | 127   | 132   | 125   | 108   | 129   | 96    | 47    | 82    | 52    | 36    | 48    | 30    | 33    | 95    | 182   | 112   | 81    | 154   | 115   | 96       | Tmco4    |        |
| Tmco5    | 0     | 0     | 0     | 0     | 1     | 0     | 0     | 1     | 0     | 0     | 0     | 0     | 0     | 0     | 0     | 0     | 0     | 0     | 0     | 0     | 0     | 0     | 0     | 0     | 0     | 0     | 0     | 0        | 1        | Tmco5  |
| Tmco5b   | 0     | 0     | 0     | 0     | 1     | 0     | 0     | 0     | 0     | 0     | 0     | 2     | 0     | 0     | 2     | 0     | 1     | 3     | 0     | 4     | 0     | 0     | 1     | 1     | 5     | 2     | 0     | 0        | 1        | Tmco5b |
| Tmco6    | 837   | 980   | 1140  | 1056  | 810   | 859   | 778   | 1072  | 1070  | 1138  | 1047  | 1313  | 1128  | 1195  | 785   | 823   | 1053  | 875   | 960   | 832   | 789   | 1041  | 1052  | 1200  | 1202  | 1236  | 1303  | 1280     | Tmco6    |        |
| Tmdd1    | 0     | 3     | 2     | 0     | 1     | 0     | 1     | 0     | 1     | 0     | 3     | 0     | 5     | 0     | 4     | 1     | 5     | 4     | 1     | 0     | 0     | 0     | 1     | 2     | 0     | 0     | 1     | 0        | Tmdd1    |        |
| Tmed1    | 487   | 536   | 627   | 366   | 375   | 430   | 389   | 1257  | 1482  | 1242  | 1351  | 1539  | 1492  | 1379  | 516   | 558   | 479   | 372   | 443   | 511   | 352   | 1163  | 1501  | 1301  | 1154  | 1661  | 1490  | 1432     | Tmed1    |        |
| Tmed10   | 12140 | 10509 | 12531 | 11485 | 11407 | 11487 | 12222 | 11883 | 11852 | 11929 | 12122 | 11918 | 11969 | 12366 | 12493 | 11566 | 12397 | 11731 | 11337 | 11709 | 11720 | 12457 | 12258 | 11978 | 11570 | 13247 | 12121 | 12819    | Tmed10   |        |
| Tmed2    | 11506 | 9509  | 10606 | 9186  | 8107  | 8663  | 9021  | 7795  | 7187  | 6642  | 7732  | 6959  | 7499  | 6942  | 11190 | 10581 | 9068  | 9157  | 8641  | 9088  | 8262  | 6985  | 8148  | 6840  | 6936  | 8451  | 7592  | 7346     | Tmed2    |        |
| Tmed3    | 828   | 873   | 730   | 696   | 722   | 749   | 639   | 1364  | 1753  | 1388  | 1720  | 1288  | 1319  | 1221  | 916   | 811   | 712   | 864   | 629   | 696   | 690   | 1422  | 1889  | 1468  | 1228  | 1370  | 1235  | 1212     | Tmed3    |        |
| Tmed4    | 5088  | 5637  | 5223  | 5122  | 4912  | 4665  | 5002  | 5041  | 4682  | 4642  | 4391  | 5044  | 4801  | 5434  | 5124  | 5122  | 5201  | 5036  | 5108  | 5133  | 5034  | 4809  | 4809  | 5203  | 5065  | 5629  | 5363  | 5474     | Tmed4    |        |
| Tmed5    | 5755  | 3803  | 5651  | 4898  | 3835  | 4919  | 4975  | 3047  | 2712  | 2151  | 2880  | 2833  | 3138  | 3421  | 5836  | 5495  | 4836  | 4307  | 4161  | 4813  | 4748  | 2665  | 3008  | 2683  | 2661  | 3411  | 3166  | 3440     | Tmed5    |        |
| Tmed6    | 0     | 0     | 1     | 3     | 1     | 0     | 4     | 1     | 1     | 0     | 0     | 0     | 0     | 0     | 0     | 0     | 0     | 1     | 0     | 1     | 2     | 2     | 0     | 2     | 0     | 0     | 2     | 0        | Tmed6    |        |
| Tmed7    | 15546 | 11619 | 13032 | 12586 | 11005 | 12525 | 13144 | 12770 | 11226 | 9728  | 10517 | 10465 | 10461 | 10792 | 15647 | 13676 | 12232 | 12279 | 11603 | 12866 | 12962 | 11262 | 11678 | 10253 | 10365 | 11099 | 10871 | 11444    | Tmed7    |        |
| Tmed8    | 5493  | 5204  | 4177  | 4821  | 5570  | 5578  | 5385  | 3609  | 3227  | 3113  | 3038  | 2936  | 3269  | 3035  | 5612  | 5534  | 4704  | 5185  | 5005  | 5431  | 5684  | 3494  | 3018  | 2521  | 3228  | 2115  | 3212  | 2940     | Tmed8    |        |
| Tmed9    | 7046  | 7936  | 8754  | 7939  | 6075  | 6568  | 6297  | 6655  | 6746  | 7503  | 7866  | 7008  | 7473  | 7272  | 6587  | 6848  | 8234  | 6884  | 6958  | 7133  | 6230  | 5720  | 7191  | 8590  | 7026  | 8714  | 7951  | 7980     | Tmed9    |        |
| Tmef1    | 11885 | 10432 | 13206 | 14399 | 17412 | 15651 | 16084 | 21943 | 15678 | 18956 | 16566 | 18058 | 18850 | 19346 | 14867 | 11275 | 14286 | 14997 | 15746 | 16491 | 15740 | 21973 | 15952 | 18431 | 20646 | 15523 | 18792 | 19365    | Tmef1    |        |
| Tmef2    | 1505  | 1460  | 1065  | 2156  | 3492  | 2346  | 2362  | 1603  | 1705  | 1608  | 2020  | 812   | 1236  | 819   | 2049  | 1609  | 1803  | 2556  | 2472  | 2457  | 2508  | 2425  | 1865  | 987   | 1551  | 711   | 746   | 767      | Tmef2    |        |
| Tmem100  | 701   | 447   | 514   | 419   | 434   | 467   | 364   | 414   | 588   | 460   | 644   | 276   | 408   | 346   | 543   | 576   | 435   | 413   | 369   | 449   | 384   | 393   | 727   | 410   | 386   | 472   | 346   | 298      | Tmem100  |        |
| Tmem101  | 1305  | 1455  | 1542  | 1348  | 1311  | 1299  | 1188  | 1294  | 1467  | 1565  | 1565  | 1676  | 1562  | 1471  | 1170  | 1181  | 1647  | 1295  | 1523  | 1435  | 1256  | 1362  | 1450  | 1844  | 1497  | 1777  | 1873  | 1716     | Tmem101  |        |
| Tmem102  | 104   | 75    | 39    | 61    | 69    | 28    | 35    | 35    | 35    | 35    | 27    | 12    | 20    | 7     | 90    | 86    | 35    | 63    | 27    | 28    | 42    | 8     | 46    | 24    | 8     | 30    | 7     | 4        | Tmem102  |        |
| Tmem104  | 929   | 1278  | 1161  | 1214  | 1013  | 970   | 935   | 586   | 732   | 820   | 818   | 665   | 710   | 582   | 886   | 1248  | 1144  | 1197  | 987   | 820   | 970   | 739   | 711   | 795   | 759   | 776   | 630   | 637      | Tmem104  |        |
| Tmem106a | 98    | 107   | 83    | 98    | 125   | 113   | 84    | 109   | 160   | 141   | 170   | 126   | 180   | 132   | 142   | 150   | 124   | 108   | 104   | 113   | 105   | 147   | 230   | 144   | 150   | 151   | 151   | 167      | Tmem106a |        |
| Tmem106b | 6234  | 5182  | 4453  | 5219  | 5579  | 5699  | 5541  | 8272  | 7459  | 6084  | 6970  | 6130  | 6377  | 5957  | 6924  | 5941  | 4668  | 5334  | 4749  | 6261  | 5689  | 7304  | 8150  | 5641  | 6442  | 5033  | 6091  | 6073     | Tmem106b |        |
| Tmem106c | 1441  | 1822  | 2008  | 1830  | 1648  | 1667  | 1681  | 1653  | 1648  | 1708  | 1526  | 1715  | 1601  | 1604  | 1636  | 1655  | 1905  | 1716  | 1750  | 1646  | 1642  | 1750  | 1777  | 1763  | 1805  | 1946  | 1806  | 1758     | Tmem106c |        |
| Tmem107  | 790   | 1063  | 1020  | 913   | 695   | 726   | 968   | 481   | 550   | 532   | 534   | 534   | 629   | 598   | 749   | 811   | 1044  | 905   | 887   | 855   | 880   | 465   | 576   | 565   | 517   | 802   | 558   | 631      | Tmem107  |        |
| Tmem108  | 1162  | 1221  | 1374  | 1836  | 1733  | 1379  | 1549  | 740   | 935   | 1086  | 910   | 1057  | 846   | 1107  | 1135  | 1276  | 1531  | 1729  | 1718  | 1128  | 1520  | 1108  | 927   | 1140  | 1207  | 1161  | 868   | 822      | Tmem108  |        |
| Tmem109  | 1488  | 1702  | 1694  | 1354  | 1340  | 1322  | 1148  | 1780  | 2267  | 1965  | 2369  | 1744  | 1949  | 1674  | 1302  | 1677  | 1277  | 1403  | 1245  | 1214  | 1079  | 1776  | 2421  | 2017  | 1743  | 2114  | 1806  | 1836     | Tmem109  |        |
| Tmem111  | 1503  | 1681  | 1813  | 1673  | 1467  | 1417  | 1473  | 1421  | 1522  | 1558  | 1635  | 1754  | 1640  | 1839  | 1435  | 1426  | 1681  | 1333  | 1673  | 1400  | 1532  | 1330  | 1586  | 1830  | 1638  | 2203  | 1808  | 2015     | Tmem111  |        |
| Tmem114  | 5     | 7     | 4     | 4     | 4     | 1     | 3     | 0     | 4     | 4     | 1     | 5     | 0     | 2     | 11    | 5     | 2     | 2     | 4     | 4     | 2     | 7     | 3     | 2     | 3     | 5     | 1     | 1        | Tmem114  |        |
| Tmem115  | 2467  | 3537  | 2662  | 2705  | 2177  | 2492  | 2057  | 1568  | 1780  | 1689  | 1611  | 1569  | 1583  | 1525  | 2469  | 2929  | 2750  | 2633  | 2441  | 2367  | 2418  | 1606  | 1763  | 1568  | 1612  | 1758  | 1641  | 1626     | Tmem115  |        |
| Tmem116  | 35    | 42    | 37    | 34    | 52    | 45    | 27    | 46    | 41    | 45    | 58    | 35    | 43    | 34    | 25    | 36    | 25    | 33    | 39    | 36    | 21    | 43    | 40    | 41    | 41    | 36    | 55    | 43       | Tmem116  |        |
| Tmem117  | 51    | 48    | 42    | 28    | 90    | 57    | 51    | 159   | 149   | 137   | 164   | 67    | 107   | 76    | 87    | 79    | 71    | 63    | 60    | 70    | 70    | 137   | 164   | 95    | 124   | 118   | 77    | 77       | Tmem117  |        |
| Tmem119  | 924   | 835   | 630   | 475   | 250   | 492   | 107   | 1053  | 1505  | 1073  | 1768  | 899   | 1412  | 843   | 662   | 1262  | 516   | 627   | 202   | 156   | 109   | 1029  | 1843  | 1160  | 898   | 1443  | 1082  | 961      | Tmem119  |        |
| Tmem120a | 2684  | 3569  | 2651  | 2829  | 2532  | 2729  | 2675  | 1303  | 1346  | 1303  | 1258  | 1178  | 1142  | 1212  | 2571  | 2811  | 2726  | 2905  | 3101  | 2997  | 2953  | 1439  | 1202  | 1345  | 1245  | 1267  | 1244  | Tmem120a |          |        |
| Tmem120b | 937   | 1272  | 1059  | 1389  | 1141  | 1101  | 1103  | 382   | 517   | 494   | 577   | 497   | 439   | 441   | 1023  | 1201  | 1203  | 1347  | 1170  | 1073  | 1249  | 570   | 540   | 503   | 466   | 385   | 381   | 408      | Tmem120b |        |
| Tmem121  | 1343  | 1774  | 1295  | 1380  | 1239  | 1388  | 1003  | 520   | 609   | 521   | 463   | 682   | 616   | 462   | 1352  | 1379  | 1493  | 1265  | 1479  | 1329  | 1126  | 566   | 595   | 550   | 622   | 668   | 733   | 522      | Tmem121  |        |
| Tmem121b | 1339  | 1545  | 1653  | 2128  | 2657  | 2170  | 2257  | 1292  | 1431  | 1949  | 1455  | 1634  | 1540  | 1554  | 1416  | 1247  | 2108  | 2256  | 2439  | 2109  | 2407  | 1978  | 1236  | 1573  | 1930  | 1395  | 1330  | 1405     | Tmem121b |        |
| Tmem123  | 13024 | 10233 | 12665 | 6322  | 7858  | 7825  | 7825  | 6594  | 5369  | 4484  | 5274  | 6865  | 7030  | 7152  | 13217 | 12370 | 9897  | 7962  | 6700  | 8140  | 7074  | 4517  | 5978  | 5586  | 4514  | 7479  | 8022  | 8158     | Tmem123  |        |
| Tmem125  | 31    | 14    | 9     | 4     | 6     | 9     | 3     | 16    | 30    | 10    | 30    | 4     | 25    | 13    | 9     | 17    | 6     | 9     | 5     | 2     | 4     | 10    | 38    | 17    | 2     | 26    | 10    | 8        | Tmem125  |        |
| Tmem126a | 1339  | 1130  | 1337  | 1127  | 1291  | 1217  | 1486  | 1711  | 1393  | 1646  | 1486  | 1572  | 1758  | 1923  | 1313  | 1210  | 1385  | 1179  | 1076  | 1373  | 1361  | 1626  | 1407  | 1780  | 1479  | 1931  | 1947  | 1832     | Tmem126a |        |
| Tmem126b | 2418  | 2267  | 2683  | 2201  | 2182  | 2211  | 2315  | 2800  | 2392  | 2427  | 2533  | 2565  | 2561  | 2618  | 2542  | 2560  | 2337  | 2202  | 2200  | 2787  | 2380  | 2575  | 2665  | 2525  | 2347  | 2701  | 2626  | 2854     | Tmem126b |        |
| Tmem127  | 6717  | 6669  | 6838  | 7565  | 7533  | 7154  | 7197  | 6510  | 6328  | 6353  | 6576  | 6402  | 6148  | 6521  | 6451  | 5998  | 7248  | 7440  | 7362  | 6649  | 7567  | 7610  | 6394  | 6392  | 7131  | 6129  | 6255  | 6408     | Tmem127  |        |
| Tmem128  | 2072  | 2094  | 2224  | 1914  | 1838  | 1863  | 2183  | 2972  | 2446  | 2344  | 2189  | 2676  | 2618  | 2893  | 2446  | 2059  | 2107  | 1791  | 2005  | 2507  | 1868  | 2538  | 2527  | 2579  | 2658  | 2821  | 2867  | 2985     | Tmem128  |        |
| Tmem129  | 2605  | 3017  | 2440  | 2375  | 1696  | 2102  | 1980  | 1530  | 1575  | 1309  | 1395  | 1442  | 1556  | 1440  | 2521  | 2578  | 2406  | 2168  | 2217  | 2351  | 2099  | 1399  | 1586  | 1408  | 1355  | 1763  | 1533  | 1480     | Tmem129  |        |
| Tmem130  | 2663  | 3708  | 2540  | 6313  | 9366  | 7590  | 7990  | 6599  | 6602  | 8364  | 6257  | 4979  | 3935  | 4880  | 3647  | 2461  | 4833  | 7304  | 8468  | 7843  | 9104  | 10181 | 5898  | 6561  | 8320  | 3831  | 4134  | 4264     | Tmem130  |        |
| Tmem131  | 11683 | 10490 | 10527 | 12023 | 12546 | 12282 | 12506 | 8576  | 9923  | 10721 | 10729 | 11668 | 10290 | 10377 | 10440 | 12080 | 11783 | 11833 | 12101 | 10115 | 12410 | 10317 | 9040  | 9889  | 10609 | 8306  | 9912  | 9670     | Tmem131  |        |
| Tmem131b | 10156 | 9744  | 6914  | 9705  | 10942 | 11220 | 12196 | 12461 | 13357 | 13230 | 11629 | 14897 | 11174 | 15070 | 9581  | 8774  | 9036  | 10059 | 11288 | 10085 | 11845 | 12860 | 10310 | 13855 |       |       |       |          |          |        |

|          |       |       |       |       |       |       |       |       |       |      |       |       |       |       |       |       |       |       |       |       |       |      |       |      |       |       |       |       |          |
|----------|-------|-------|-------|-------|-------|-------|-------|-------|-------|------|-------|-------|-------|-------|-------|-------|-------|-------|-------|-------|-------|------|-------|------|-------|-------|-------|-------|----------|
| Tmem165  | 7728  | 5793  | 6224  | 5882  | 5353  | 5951  | 5893  | 6099  | 5572  | 4966 | 5697  | 5517  | 5838  | 6168  | 7402  | 7136  | 5617  | 6077  | 5241  | 5911  | 5683  | 5274 | 6082  | 5462 | 4796  | 6575  | 5932  | 6502  | Tmem165  |
| Tmem167  | 14587 | 10551 | 9153  | 9181  | 9079  | 11163 | 12046 | 13945 | 11942 | 9492 | 10497 | 10974 | 11077 | 11830 | 14493 | 12278 | 9087  | 9180  | 9164  | 14023 | 11382 | 9981 | 12033 | 9674 | 10224 | 10647 | 11941 | 11769 | Tmem167  |
| Tmem167b | 7495  | 6801  | 6681  | 6739  | 5977  | 6599  | 7016  | 6787  | 5515  | 5460 | 5377  | 5876  | 5313  | 6122  | 7907  | 6741  | 6906  | 6897  | 6385  | 6919  | 6902  | 6355 | 5941  | 5784 | 6051  | 6098  | 6009  | 6048  | Tmem167b |
| Tmem168  | 2435  | 1729  | 1959  | 1782  | 1924  | 1841  | 2002  | 3566  | 3399  | 2617 | 3013  | 2981  | 3154  | 2991  | 2397  | 2009  | 1692  | 1794  | 1809  | 2111  | 1771  | 2769 | 3521  | 2836 | 2724  | 3128  | 3163  | 3203  | Tmem168  |
| Tmem169  | 2110  | 2128  | 2238  | 2658  | 3202  | 2907  | 3273  | 2341  | 1933  | 2310 | 2174  | 2177  | 2036  | 2322  | 2776  | 2008  | 2744  | 2746  | 2741  | 2855  | 3069  | 2884 | 1966  | 2194 | 2280  | 1807  | 1958  | 2194  | Tmem169  |
| Tmem17   | 105   | 107   | 151   | 97    | 185   | 121   | 123   | 530   | 477   | 374  | 399   | 451   | 431   | 431   | 169   | 98    | 104   | 100   | 168   | 179   | 154   | 436  | 504   | 394  | 458   | 473   | 463   | 458   | Tmem17   |
| Tmem170  | 1678  | 1689  | 1952  | 1833  | 1305  | 1373  | 1698  | 1072  | 943   | 936  | 1007  | 1063  | 1175  | 1100  | 1513  | 1734  | 1823  | 1621  | 1526  | 1303  | 1500  | 954  | 970   | 1042 | 937   | 1239  | 1061  | 1219  | Tmem170  |
| Tmem170b | 5447  | 3854  | 4914  | 6475  | 7131  | 7006  | 7771  | 5174  | 4268  | 5286 | 4736  | 4560  | 4433  | 4952  | 5583  | 4555  | 5552  | 6864  | 6749  | 6512  | 7579  | 6269 | 4119  | 4886 | 6056  | 3548  | 4645  | 4584  | Tmem170b |
| Tmem171  | 0     | 0     | 0     | 0     | 0     | 0     | 2     | 0     | 2     | 0    | 0     | 0     | 1     | 2     | 1     | 2     | 2     | 0     | 0     | 2     | 0     | 3    | 4     | 2    | 1     | 0     | 0     | 0     | Tmem171  |
| Tmem174  | 0     | 0     | 0     | 0     | 0     | 0     | 2     | 0     | 0     | 0    | 0     | 0     | 0     | 0     | 1     | 0     | 0     | 4     | 0     | 0     | 0     | 0    | 0     | 0    | 0     | 0     | 0     | 0     | Tmem174  |
| Tmem175  | 858   | 877   | 825   | 821   | 870   | 935   | 976   | 1566  | 1795  | 1402 | 1548  | 1458  | 1431  | 1284  | 944   | 864   | 875   | 819   | 876   | 886   | 855   | 1606 | 1722  | 1374 | 1536  | 1317  | 1489  | 1225  | Tmem175  |
| Tmem176a | 1240  | 1095  | 1103  | 991   | 928   | 977   | 855   | 1167  | 1384  | 1093 | 1383  | 972   | 1281  | 930   | 1126  | 1368  | 931   | 1093  | 765   | 890   | 776   | 1213 | 1442  | 1164 | 910   | 1398  | 1110  | 1048  | Tmem176a |
| Tmem176b | 2178  | 2300  | 1831  | 1951  | 2351  | 2321  | 2240  | 3173  | 3648  | 3038 | 3565  | 2552  | 3142  | 2462  | 2167  | 2389  | 2079  | 2246  | 2275  | 2441  | 2035  | 3177 | 3864  | 3210 | 2824  | 3182  | 2709  | 2617  | Tmem176b |
| Tmem177  | 1216  | 1488  | 1225  | 1282  | 1346  | 1425  | 1427  | 1279  | 1275  | 1184 | 1062  | 1215  | 1200  | 1089  | 1353  | 1134  | 1315  | 1206  | 1508  | 1665  | 1536  | 939  | 1192  | 1149 | 1228  | 1332  | 1148  | 1216  | Tmem177  |
| Tmem178  | 457   | 359   | 404   | 641   | 1072  | 774   | 916   | 1261  | 1210  | 1341 | 1079  | 1165  | 961   | 1249  | 487   | 326   | 549   | 613   | 1002  | 730   | 936   | 1303 | 1059  | 1432 | 1403  | 1027  | 980   | 1003  | Tmem178  |
| Tmem178b | 3939  | 4590  | 3685  | 7308  | 9727  | 8793  | 9281  | 7238  | 6779  | 8051 | 7128  | 6147  | 6467  | 6723  | 5283  | 4125  | 5409  | 7772  | 8011  | 7775  | 9819  | 9660 | 6036  | 5838 | 9264  | 3426  | 6104  | 5814  | Tmem178b |
| Tmem179  | 419   | 542   | 357   | 779   | 1201  | 850   | 882   | 771   | 938   | 1136 | 946   | 727   | 628   | 653   | 566   | 463   | 776   | 792   | 1068  | 886   | 918   | 1255 | 867   | 941  | 1283  | 614   | 550   | 527   | Tmem179  |
| Tmem179b | 591   | 592   | 519   | 475   | 392   | 439   | 574   | 576   | 494   | 511  | 577   | 466   | 590   | 496   | 526   | 510   | 594   | 524   | 479   | 486   | 501   | 521  | 608   | 580  | 515   | 689   | 559   | 579   | Tmem179b |
| Tmem18   | 3403  | 3001  | 3195  | 2981  | 2751  | 2890  | 2777  | 2699  | 2539  | 2383 | 2437  | 2364  | 2575  | 2382  | 3516  | 3382  | 3012  | 2821  | 2764  | 3172  | 2673  | 2199 | 2584  | 2327 | 2257  | 2571  | 2778  | 2585  | Tmem18   |
| Tmem181a | 4344  | 4016  | 4354  | 4513  | 4716  | 4662  | 4611  | 3171  | 3297  | 3128 | 3429  | 3114  | 3275  | 3270  | 4634  | 4428  | 4077  | 4848  | 4257  | 4508  | 4259  | 3574 | 3004  | 2837 | 3275  | 3003  | 2728  | 3151  | Tmem181a |
| Tmem182  | 2     | 1     | 0     | 2     | 1     | 4     | 4     | 13    | 16    | 15   | 122   | 1     | 12    | 7     | 3     | 5     | 7     | 0     | 5     | 0     | 2     | 27   | 117   | 8    | 12    | 7     | 2     | 6     | Tmem182  |
| Tmem183a | 12314 | 11811 | 10508 | 11787 | 11189 | 11072 | 12592 | 10603 | 8786  | 9331 | 8016  | 9750  | 8848  | 9202  | 12897 | 10999 | 11239 | 11283 | 11992 | 12990 | 12284 | 9523 | 9132  | 9156 | 9534  | 10143 | 9941  | 9443  | Tmem183a |
| Tmem184a | 47    | 38    | 38    | 53    | 36    | 16    | 27    | 45    | 48    | 78   | 83    | 16    | 41    | 21    | 29    | 45    | 28    | 33    | 35    | 32    | 24    | 30   | 91    | 96   | 10    | 84    | 6     | 25    | Tmem184a |
| Tmem184b | 4746  | 6100  | 6115  | 5496  | 4506  | 4580  | 4178  | 2659  | 3330  | 3330 | 3903  | 3526  | 3457  | 3269  | 4233  | 5987  | 5935  | 5285  | 4747  | 3668  | 4337  | 3096 | 3278  | 3387 | 3247  | 3916  | 3022  | 3185  | Tmem184b |
| Tmem184c | 7158  | 6745  | 5983  | 6192  | 6507  | 6274  | 6835  | 4708  | 4124  | 4220 | 4021  | 3999  | 3917  | 4204  | 7102  | 6656  | 6465  | 6730  | 6519  | 6413  | 6885  | 4654 | 3840  | 4006 | 4135  | 4043  | 3969  | 3884  | Tmem184c |
| Tmem185a | 3061  | 2959  | 2860  | 2791  | 2906  | 2715  | 2680  | 2611  | 2422  | 2072 | 2098  | 2533  | 2361  | 2217  | 3033  | 2618  | 2913  | 2732  | 2851  | 3175  | 2735  | 2557 | 2372  | 2374 | 2385  | 2619  | 2350  | 2436  | Tmem185a |
| Tmem185b | 632   | 631   | 804   | 562   | 621   | 668   | 594   | 1211  | 1195  | 1194 | 1135  | 1194  | 1312  | 1152  | 673   | 639   | 598   | 558   | 655   | 690   | 603   | 1173 | 1206  | 1124 | 1118  | 1292  | 1364  | 1224  | Tmem185b |
| Tmem186  | 1857  | 1823  | 2133  | 1678  | 1856  | 1689  | 1792  | 2660  | 2555  | 2599 | 2453  | 2839  | 2573  | 2776  | 1863  | 1652  | 1906  | 1590  | 1896  | 1962  | 1826  | 2361 | 2362  | 2796 | 2627  | 2924  | 2931  | 2905  | Tmem186  |
| Tmem189  | 2331  | 2653  | 2542  | 2598  | 2267  | 2249  | 2039  | 912   | 1061  | 1110 | 1102  | 1004  | 1083  | 1070  | 2300  | 2587  | 2520  | 2459  | 2222  | 2004  | 2229  | 954  | 997   | 989  | 1021  | 1170  | 998   | 1027  | Tmem189  |
| Tmem19   | 3224  | 3249  | 3213  | 3547  | 3120  | 3240  | 3503  | 2157  | 2181  | 2321 | 2181  | 2295  | 2311  | 2368  | 3221  | 3419  | 3457  | 3418  | 3162  | 2919  | 3355  | 2341 | 2273  | 2344 | 2435  | 2426  | 2284  | 2528  | Tmem19   |
| Tmem190  | 0     | 1     | 0     | 0     | 0     | 0     | 0     | 2     | 1     | 1    | 0     | 0     | 0     | 0     | 0     | 0     | 0     | 1     | 0     | 0     | 0     | 0    | 0     | 0    | 0     | 1     | 1     | 0     | Tmem190  |
| Tmem191c | 450   | 621   | 683   | 862   | 883   | 735   | 701   | 358   | 489   | 727  | 572   | 605   | 548   | 585   | 422   | 555   | 788   | 843   | 846   | 691   | 752   | 650  | 375   | 631  | 641   | 588   | 569   | 553   | Tmem191c |
| Tmem192  | 776   | 745   | 498   | 652   | 476   | 581   | 559   | 381   | 413   | 322  | 443   | 357   | 379   | 338   | 683   | 660   | 559   | 631   | 575   | 591   | 571   | 348  | 438   | 356  | 372   | 339   | 352   | 329   | Tmem192  |
| Tmem196  | 131   | 100   | 156   | 162   | 396   | 305   | 346   | 304   | 306   | 349  | 299   | 285   | 271   | 303   | 175   | 91    | 207   | 216   | 295   | 269   | 331   | 433  | 318   | 256  | 329   | 234   | 307   | 325   | Tmem196  |
| Tmem198  | 1028  | 1685  | 1378  | 2005  | 1907  | 1681  | 1491  | 805   | 879   | 998  | 728   | 936   | 761   | 796   | 1188  | 1239  | 1898  | 2054  | 2182  | 1522  | 1767  | 1223 | 818   | 1010 | 1101  | 799   | 882   | 726   | Tmem198  |
| Tmem198b | 2344  | 2496  | 2562  | 2105  | 2060  | 1859  | 2084  | 1685  | 1765  | 1745 | 1898  | 1981  | 2132  | 1973  | 2196  | 2155  | 2467  | 2108  | 2144  | 1937  | 1970  | 1741 | 1880  | 1879 | 1728  | 2268  | 2034  | 2104  | Tmem198b |
| Tmem199  | 1954  | 1970  | 2145  | 2110  | 1969  | 1777  | 2066  | 2348  | 1877  | 1907 | 1774  | 2334  | 2073  | 2439  | 2097  | 1688  | 2150  | 1887  | 2113  | 2393  | 1994  | 2102 | 1985  | 2177 | 2116  | 2337  | 2346  | 2540  | Tmem199  |
| Tmem200a | 720   | 633   | 956   | 771   | 1148  | 988   | 1005  | 2043  | 1905  | 2306 | 2077  | 2055  | 1701  | 1950  | 808   | 544   | 983   | 795   | 1022  | 947   | 976   | 2648 | 1995  | 2187 | 2196  | 1854  | 1864  | 1984  | Tmem200a |
| Tmem200b | 85    | 68    | 85    | 60    | 32    | 50    | 21    | 147   | 213   | 165  | 239   | 94    | 126   | 65    | 75    | 87    | 61    | 80    | 33    | 16    | 18    | 134  | 223   | 188  | 95    | 123   | 83    | 84    | Tmem200b |
| Tmem200c | 281   | 290   | 366   | 349   | 422   | 406   | 348   | 226   | 227   | 299  | 264   | 321   | 243   | 256   | 301   | 252   | 436   | 275   | 401   | 337   | 341   | 204  | 269   | 331  | 256   | 323   | 286   | 258   | Tmem200c |
| Tmem201  | 4409  | 6040  | 6482  | 7248  | 6352  | 5777  | 5425  | 3477  | 4260  | 4958 | 5294  | 5325  | 4826  | 4758  | 4005  | 5354  | 6919  | 7628  | 6223  | 4753  | 5759  | 5238 | 4047  | 5277 | 5323  | 5329  | 4733  | 4837  | Tmem201  |
| Tmem202  | 1     | 2     | 1     | 3     | 4     | 2     | 2     | 1     | 3     | 6    | 8     | 2     | 2     | 3     | 3     | 2     | 0     | 0     | 5     | 4     | 5     | 2    | 10    | 2    | 11    | 3     | 7     | 0     | Tmem202  |
| Tmem203  | 562   | 613   | 590   | 518   | 506   | 486   | 540   | 405   | 517   | 405  | 518   | 543   | 533   | 513   | 585   | 485   | 560   | 610   | 520   | 533   | 452   | 453  | 560   | 505  | 493   | 532   | 550   | 457   | Tmem203  |
| Tmem204  | 271   | 316   | 354   | 300   | 283   | 303   | 258   | 271   | 320   | 289  | 353   | 263   | 346   | 296   | 290   | 288   | 299   | 246   | 304   | 350   | 236   | 287  | 444   | 270  | 302   | 381   | 320   | 273   | Tmem204  |
| Tmem205  | 707   | 785   | 688   | 815   | 652   | 706   | 689   | 622   | 623   | 563  | 637   | 563   | 545   | 585   | 644   | 713   | 677   | 763   | 683   | 840   | 755   | 523  | 693   | 574  | 591   | 557   | 664   | 563   | Tmem205  |
| Tmem207  | 3     | 5     | 0     | 7     | 2     | 2     | 6     | 9     | 9     | 4    | 1     | 15    | 9     | 10    | 0     | 5     | 10    | 3     | 0     | 1     | 4     | 2    | 3     | 7    | 11    | 8     | 3     | 9     | Tmem207  |
| Tmem208  | 1168  | 1481  | 1495  | 1470  | 1453  | 1480  | 1606  | 1363  | 1563  | 1213 | 1422  | 1320  | 1477  | 1327  | 1360  | 1473  | 1425  | 1544  | 1632  | 1796  | 1397  | 1273 | 1528  | 1396 | 1477  | 1495  | 1428  | 1428  | Tmem208  |
| Tmem209  | 3127  | 2710  | 2458  | 2506  | 2647  | 2584  | 3176  | 4822  | 4317  | 4004 | 3528  | 5132  | 4267  | 4988  | 3281  | 2511  | 2666  | 2517  | 2687  | 3030  | 2927  | 4204 | 4187  | 4140 | 4276  | 5000  | 4937  | 4829  | Tmem209  |
| Tmem210  | 1     | 0     | 3     | 0     |       |       |       |       |       |      |       |       |       |       |       |       |       |       |       |       |       |      |       |      |       |       |       |       |          |

|            |       |       |       |       |       |       |       |       |       |       |       |       |       |       |       |       |       |       |       |       |       |       |       |       |       |       |       |         |            |         |
|------------|-------|-------|-------|-------|-------|-------|-------|-------|-------|-------|-------|-------|-------|-------|-------|-------|-------|-------|-------|-------|-------|-------|-------|-------|-------|-------|-------|---------|------------|---------|
| Tmem248    | 3878  | 3485  | 4294  | 3697  | 3523  | 3308  | 3247  | 2989  | 3244  | 3203  | 3591  | 3753  | 3770  | 3600  | 3551  | 3993  | 3844  | 3393  | 3448  | 3071  | 3344  | 3715  | 3243  | 3507  | 3473  | 4429  | 3689  | 3909    | Tmem248    |         |
| Tmem249    | 21    | 32    | 37    | 39    | 25    | 23    | 29    | 11    | 21    | 1     | 6     | 21    | 7     | 11    | 30    | 16    | 34    | 28    | 43    | 27    | 20    | 13    | 9     | 9     | 15    | 8     | 14    | 11      | Tmem249    |         |
| Tmem25     | 490   | 575   | 521   | 631   | 746   | 565   | 567   | 325   | 451   | 462   | 542   | 462   | 477   | 357   | 502   | 469   | 643   | 536   | 694   | 588   | 592   | 553   | 409   | 360   | 471   | 372   | 384   | 354     | Tmem25     |         |
| Tmem250-ps | 934   | 1001  | 1181  | 882   | 905   | 895   | 919   | 1445  | 1873  | 1712  | 1972  | 2016  | 1827  | 1741  | 884   | 900   | 959   | 988   | 1072  | 852   | 928   | 1641  | 1942  | 2004  | 1708  | 2373  | 1864  | 1974    | Tmem250-ps |         |
| Tmem251    | 1335  | 1259  | 1112  | 1150  | 937   | 1061  | 1215  | 1137  | 943   | 818   | 880   | 1084  | 905   | 1104  | 1338  | 1234  | 1165  | 1137  | 969   | 1340  | 1011  | 961   | 924   | 977   | 905   | 1197  | 1106  | 1129    | Tmem251    |         |
| Tmem252    | 17    | 16    | 15    | 22    | 24    | 32    | 28    | 55    | 60    | 75    | 110   | 59    | 60    | 61    | 33    | 10    | 17    | 22    | 35    | 28    | 36    | 62    | 73    | 88    | 86    | 76    | 73    | 61      | Tmem252    |         |
| Tmem253    | 50    | 34    | 48    | 58    | 47    | 72    | 55    | 51    | 63    | 64    | 67    | 67    | 45    | 82    | 38    | 32    | 64    | 63    | 96    | 48    | 57    | 47    | 47    | 58    | 49    | 59    | 67    | 74      | Tmem253    |         |
| Tmem254a   | 0     | 0     | 0     | 0     | 0     | 0     | 1     | 0     | 0     | 0     | 0     | 0     | 0     | 0     | 0     | 0     | 0     | 0     | 0     | 0     | 0     | 2     | 0     | 0     | 0     | 0     | 0     | 0       | Tmem254a   |         |
| Tmem255a   | 1746  | 1392  | 1174  | 1409  | 2011  | 1664  | 1697  | 1796  | 1863  | 1397  | 2004  | 907   | 1111  | 941   | 1614  | 1537  | 1363  | 1508  | 1418  | 1977  | 1531  | 1813  | 2253  | 1176  | 1291  | 1300  | 955   | 1049    | Tmem255a   |         |
| Tmem255b   | 3     | 2     | 2     | 9     | 2     | 4     | 2     | 10    | 16    | 3     | 18    | 0     | 6     | 4     | 7     | 5     | 1     | 0     | 5     | 10    | 0     | 8     | 9     | 2     | 7     | 8     | 1     | 5       | Tmem255b   |         |
| Tmem256    | 2685  | 3255  | 3089  | 3179  | 2670  | 2524  | 3585  | 2082  | 1926  | 2149  | 2479  | 2186  | 2361  | 2860  | 2652  | 2103  | 3155  | 2993  | 2967  | 3181  | 3412  | 1519  | 1988  | 2586  | 2265  | 2648  | 2287  | 2712    | Tmem256    |         |
| Tmem258    | 2438  | 2308  | 2657  | 2588  | 2074  | 1794  | 2702  | 2789  | 2394  | 2619  | 2686  | 2656  | 2459  | 3882  | 2463  | 1502  | 2557  | 2089  | 2035  | 2309  | 2723  | 2090  | 2370  | 2974  | 2795  | 2901  | 2566  | 3537    | Tmem258    |         |
| Tmem259    | 4907  | 6430  | 6465  | 6409  | 5859  | 5156  | 5120  | 3932  | 4559  | 4994  | 4745  | 4975  | 4574  | 4535  | 4553  | 5243  | 6792  | 6146  | 6512  | 5043  | 5442  | 4714  | 4404  | 5227  | 4866  | 5267  | 4618  | 4309    | Tmem259    |         |
| Tmem26     | 3049  | 1620  | 1308  | 945   | 822   | 1448  | 534   | 3645  | 3044  | 2133  | 2537  | 1299  | 2161  | 1180  | 2028  | 2314  | 1192  | 1317  | 683   | 743   | 573   | 1415  | 3475  | 1560  | 1050  | 1747  | 1332  | 1441    | Tmem26     |         |
| Tmem260    | 4622  | 4050  | 3846  | 3609  | 3170  | 3343  | 3274  | 3794  | 3673  | 3545  | 3714  | 3384  | 3751  | 3335  | 4392  | 3977  | 3668  | 3617  | 3145  | 3551  | 3292  | 3527  | 3731  | 3325  | 3164  | 2993  | 3557  | 3401    | Tmem260    |         |
| Tmem262    | 2     | 4     | 2     | 2     | 5     | 4     | 6     | 5     | 6     | 5     | 8     | 5     | 12    | 22    | 13    | 5     | 2     | 0     | 2     | 2     | 4     | 18    | 9     | 8     | 15    | 19    | 27    | 8       | Tmem262    |         |
| Tmem263    | 7897  | 5581  | 7756  | 7670  | 6441  | 7311  | 7906  | 4756  | 4433  | 4096  | 5473  | 4427  | 4831  | 4835  | 7441  | 7504  | 7008  | 7697  | 6356  | 6357  | 7430  | 4896  | 4724  | 4782  | 4615  | 5009  | 4338  | 4866    | Tmem263    |         |
| Tmem266    | 295   | 448   | 452   | 517   | 585   | 439   | 426   | 232   | 234   | 289   | 225   | 224   | 249   | 195   | 360   | 404   | 414   | 424   | 437   | 514   | 428   | 508   | 282   | 277   | 244   | 359   | 163   | 194     | 209        | Tmem266 |
| Tmem267    | 619   | 470   | 928   | 799   | 882   | 1024  | 980   | 528   | 470   | 714   | 599   | 716   | 610   | 683   | 764   | 528   | 936   | 571   | 657   | 687   | 1218  | 907   | 733   | 793   | 739   | 628   | 860   | 656     | Tmem267    |         |
| Tmem268    | 516   | 454   | 656   | 495   | 430   | 457   | 418   | 470   | 583   | 569   | 500   | 533   | 497   | 530   | 407   | 461   | 575   | 453   | 500   | 394   | 410   | 399   | 511   | 548   | 493   | 680   | 450   | 570     | Tmem268    |         |
| Tmem269    | 157   | 245   | 180   | 334   | 240   | 249   | 249   | 56    | 68    | 51    | 36    | 59    | 90    | 72    | 195   | 209   | 233   | 337   | 259   | 232   | 242   | 52    | 40    | 56    | 71    | 50    | 72    | 44      | Tmem269    |         |
| Tmem270    | 0     | 0     | 0     | 0     | 0     | 0     | 0     | 0     | 0     | 1     | 2     | 0     | 0     | 0     | 0     | 0     | 0     | 0     | 0     | 0     | 2     | 0     | 0     | 0     | 0     | 0     | 0     | 0       | 0          | Tmem270 |
| Tmem273    | 9     | 6     | 11    | 17    | 9     | 8     | 4     | 12    | 24    | 19    | 21    | 16    | 18    | 6     | 13    | 12    | 8     | 15    | 10    | 10    | 14    | 18    | 29    | 26    | 10    | 23    | 21    | 8       | Tmem273    |         |
| Tmem274    | 0     | 0     | 0     | 0     | 0     | 0     | 0     | 2     | 0     | 0     | 0     | 0     | 0     | 0     | 0     | 0     | 0     | 0     | 0     | 0     | 1     | 0     | 0     | 0     | 0     | 0     | 0     | 0       | 0          | Tmem274 |
| Tmem28     | 938   | 1228  | 1291  | 1562  | 1717  | 1567  | 1472  | 608   | 644   | 715   | 641   | 772   | 662   | 661   | 910   | 886   | 1467  | 1530  | 1831  | 1250  | 1656  | 735   | 593   | 770   | 835   | 773   | 750   | 707     | Tmem28     |         |
| Tmem29     | 1283  | 1153  | 851   | 1095  | 1191  | 1401  | 1402  | 2807  | 2176  | 1840  | 1940  | 1984  | 1955  | 2104  | 1502  | 1188  | 995   | 1117  | 1232  | 1629  | 1384  | 2134  | 2313  | 1833  | 2199  | 1733  | 2100  | 1918    | Tmem29     |         |
| Tmem30a    | 16125 | 12407 | 14095 | 15550 | 14574 | 15780 | 17639 | 14476 | 11618 | 10088 | 10755 | 11533 | 11523 | 12554 | 18753 | 16331 | 13844 | 15367 | 14371 | 17062 | 16830 | 13785 | 12301 | 11000 | 11784 | 10542 | 11577 | 12349   | Tmem30a    |         |
| Tmem30b    | 960   | 520   | 384   | 318   | 129   | 195   | 29    | 390   | 386   | 438   | 390   | 157   | 268   | 138   | 616   | 879   | 312   | 306   | 30    | 21    | 24    | 317   | 405   | 396   | 145   | 469   | 166   | 126     | Tmem30b    |         |
| Tmem30c    | 61    | 56    | 82    | 95    | 111   | 89    | 94    | 62    | 43    | 32    | 63    | 50    | 56    | 77    | 54    | 72    | 51    | 87    | 97    | 52    | 130   | 79    | 49    | 65    | 55    | 66    | 64    | 52      | Tmem30c    |         |
| Tmem33     | 11749 | 9430  | 10253 | 10654 | 11972 | 12150 | 13019 | 14161 | 11006 | 10251 | 10200 | 11116 | 11027 | 11563 | 13181 | 10647 | 11049 | 10382 | 11330 | 13613 | 12042 | 12183 | 11248 | 10335 | 11537 | 9678  | 11577 | 11487   | Tmem33     |         |
| Tmem35a    | 3283  | 3377  | 3043  | 3865  | 5182  | 4498  | 5310  | 5140  | 4191  | 4209  | 3859  | 4066  | 2904  | 4078  | 3969  | 2597  | 9791  | 4147  | 5160  | 5537  | 5169  | 5691  | 4337  | 4279  | 5011  | 3695  | 3841  | 3507    | Tmem35a    |         |
| Tmem35b    | 523   | 515   | 508   | 516   | 591   | 582   | 577   | 493   | 489   | 572   | 566   | 571   | 565   | 480   | 467   | 475   | 535   | 578   | 581   | 544   | 550   | 585   | 491   | 472   | 489   | 536   | 503   | 511     | Tmem35b    |         |
| Tmem37     | 223   | 327   | 245   | 170   | 123   | 158   | 110   | 99    | 140   | 102   | 125   | 85    | 137   | 139   | 220   | 338   | 210   | 155   | 125   | 154   | 110   | 90    | 209   | 104   | 88    | 165   | 122   | 106     | Tmem37     |         |
| Tmem38a    | 1722  | 1902  | 1771  | 2186  | 2140  | 2105  | 1887  | 1066  | 1200  | 1166  | 1679  | 1049  | 1059  | 971   | 1619  | 1749  | 2067  | 2165  | 2367  | 1738  | 2078  | 1165  | 1514  | 1225  | 1091  | 1078  | 1046  | 1055    | Tmem38a    |         |
| Tmem38b    | 1533  | 1561  | 1901  | 1605  | 1283  | 1333  | 1501  | 833   | 695   | 699   | 791   | 897   | 805   | 942   | 1510  | 1373  | 1717  | 1556  | 1449  | 1439  | 1478  | 750   | 730   | 786   | 820   | 1078  | 1044  | Tmem38b |            |         |
| Tmem39a    | 2468  | 2344  | 2201  | 1888  | 1676  | 1878  | 1824  | 2468  | 3134  | 2842  | 3551  | 2558  | 2971  | 2639  | 2111  | 2280  | 2126  | 2104  | 1884  | 2005  | 1680  | 2916  | 3214  | 2786  | 2461  | 2780  | 2787  | 2716    | Tmem39a    |         |
| Tmem39b    | 655   | 923   | 859   | 846   | 741   | 752   | 697   | 1828  | 1543  | 1549  | 1456  | 1804  | 1574  | 1821  | 655   | 665   | 822   | 810   | 859   | 744   | 799   | 1549  | 1423  | 1678  | 1710  | 1984  | 1865  | 1896    | Tmem39b    |         |
| Tmem40     | 25    | 28    | 30    | 5     | 17    | 6     | 18    | 32    | 54    | 28    | 52    | 64    | 70    | 35    | 24    | 48    | 24    | 21    | 12    | 23    | 18    | 45    | 56    | 41    | 51    | 91    | 53    | 42      | Tmem40     |         |
| Tmem41a    | 1444  | 1609  | 1653  | 1600  | 1559  | 1477  | 1481  | 763   | 789   | 681   | 856   | 710   | 838   | 660   | 1494  | 1444  | 1519  | 1379  | 1612  | 1555  | 1389  | 705   | 752   | 670   | 707   | 720   | 759   | 727     | Tmem41a    |         |
| Tmem41b    | 5396  | 4797  | 4234  | 4643  | 4024  | 4518  | 4866  | 3938  | 3403  | 2783  | 3134  | 3207  | 3244  | 3283  | 5773  | 5531  | 4204  | 4549  | 3832  | 5101  | 4627  | 3432  | 3451  | 2869  | 3254  | 3206  | 3407  | 3204    | Tmem41b    |         |
| Tmem42     | 37    | 60    | 40    | 50    | 70    | 51    | 75    | 189   | 205   | 201   | 214   | 188   | 144   | 203   | 49    | 55    | 41    | 26    | 45    | 58    | 58    | 202   | 195   | 187   | 190   | 198   | 181   | 249     | Tmem42     |         |
| Tmem43     | 5283  | 6452  | 5310  | 5209  | 4637  | 5422  | 4898  | 3896  | 4397  | 3949  | 3966  | 4766  | 4332  | 4242  | 5210  | 5436  | 5202  | 5270  | 4960  | 5093  | 4937  | 3910  | 4344  | 4074  | 4396  | 4851  | 4955  | 4658    | Tmem43     |         |
| Tmem44     | 2212  | 2352  | 2486  | 3528  | 5490  | 4395  | 4402  | 7010  | 7636  | 9466  | 8481  | 8145  | 7564  | 7990  | 2661  | 2225  | 3362  | 3915  | 5160  | 3668  | 4922  | 9909  | 6803  | 8509  | 10226 | 6058  | 7626  | 7243    | Tmem44     |         |
| Tmem45a    | 340   | 241   | 268   | 200   | 163   | 292   | 134   | 4610  | 2602  | 437   | 719   | 257   | 415   | 265   | 257   | 392   | 232   | 318   | 139   | 168   | 113   | 433   | 748   | 324   | 324   | 373   | 281   | 316     | Tmem45a    |         |
| Tmem45a2   | 0     | 0     | 0     | 0     | 0     | 1     | 0     | 1     | 3     | 10    | 2     | 0     | 2     | 0     | 2     | 0     | 2     | 0     | 2     | 0     | 0     | 3     | 0     | 3     | 1     | 4     | 8     | 1       | Tmem45a2   |         |
| Tmem45b    | 1     | 0     | 0     | 1     | 1     | 0     | 0     | 6     | 3     | 0     | 5     | 2     | 1     | 2     | 1     | 0     | 1     | 0     | 0     | 4     | 0     | 1     | 0     | 9     | 2     | 0     | 4     | 0       | 1          | Tmem45b |
| Tmem47     | 6680  | 4847  | 6993  | 5579  | 5416  | 5793  | 6093  | 6282  | 4700  | 4267  | 4651  | 6298  | 5425  | 6322  | 6881  | 6118  | 6131  | 5497  | 5557  | 6222  | 5603  | 6696  | 5807  | 5394  | 5211  | 7139  | 6875  | 6984    | Tmem47     |         |
| Tmem50a    | 4086  | 4741  | 5063  | 4952  | 4538  | 4454  | 4626  | 3213  | 3449  | 3399  | 3544  | 3414  | 3539  | 3534  | 4195  | 4611  | 5010  | 4782  | 4815  | 5041  | 4782  | 3283  | 3840  | 3809  | 3598  | 3720  | 3626  | 3564    | Tmem50a    |         |
| Tmem50b    | 6030  | 6736  | 6404  | 6957  | 6725  | 6238  | 7110  | 2485  | 2329  | 2458  | 2195  | 2046  | 2225  | 2039  | 6552  | 6295  | 6519  | 7001  | 6819  | 7305  | 7058  | 2478  | 2293  | 2292  | 2400  | 2016  | 2323  | 2156    | Tmem50b    |         |
| Tmem51     | 8     | 3     | 9     | 1     | 4     | 0     | 9     | 5     | 7     | 2     | 5     | 3     | 2     | 2     | 1     | 2     | 8     | 2     | 2     | 0     | 1     |       |       |       |       |       |       |         |            |         |

|           |       |       |       |       |       |       |       |       |       |       |       |       |       |       |       |       |       |       |       |       |       |       |       |       |       |       |       |       |           |          |
|-----------|-------|-------|-------|-------|-------|-------|-------|-------|-------|-------|-------|-------|-------|-------|-------|-------|-------|-------|-------|-------|-------|-------|-------|-------|-------|-------|-------|-------|-----------|----------|
| Tmem87a   | 3504  | 2688  | 3247  | 3152  | 3112  | 3184  | 3505  | 3968  | 3691  | 3619  | 3700  | 3747  | 3790  | 3821  | 3516  | 3115  | 3226  | 3201  | 3264  | 3461  | 3048  | 3801  | 3693  | 3507  | 3722  | 3745  | 3691  | 3763  | Tmem87a   |          |
| Tmem87b   | 4715  | 3945  | 3981  | 4038  | 3976  | 4388  | 4256  | 4860  | 3962  | 4034  | 4359  | 4138  | 4276  | 4258  | 4739  | 4609  | 3928  | 3782  | 3940  | 4440  | 4295  | 4426  | 4288  | 3694  | 4110  | 3400  | 4269  | 3972  | Tmem87b   |          |
| Tmem88    | 248   | 348   | 328   | 164   | 177   | 214   | 155   | 162   | 187   | 181   | 217   | 215   | 225   | 243   | 211   | 336   | 264   | 186   | 182   | 169   | 163   | 180   | 244   | 202   | 160   | 284   | 215   | 266   | Tmem88    |          |
| Tmem88b   | 20    | 22    | 20    | 25    | 52    | 52    | 28    | 87    | 80    | 104   | 154   | 58    | 74    | 57    | 28    | 18    | 20    | 28    | 34    | 17    | 27    | 107   | 115   | 77    | 81    | 55    | 48    | 47    | Tmem88b   |          |
| Tmem89    | 0     | 0     | 2     | 0     | 0     | 1     | 0     | 0     | 0     | 0     | 0     | 0     | 0     | 0     | 0     | 1     | 0     | 0     | 0     | 0     | 0     | 0     | 0     | 1     | 0     | 0     | 0     | 0     | Tmem89    |          |
| Tmem8b    | 4061  | 4545  | 4801  | 6135  | 6948  | 5845  | 5870  | 3983  | 4146  | 5166  | 4427  | 4868  | 4433  | 4497  | 4237  | 4192  | 6005  | 6272  | 7049  | 5071  | 6266  | 5710  | 3703  | 4877  | 5414  | 4335  | 4284  | 4371  | Tmem8b    |          |
| Tmem9     | 4426  | 5029  | 4987  | 4175  | 3939  | 4046  | 3758  | 4084  | 4700  | 4081  | 4546  | 4188  | 4552  | 4278  | 4212  | 4611  | 4544  | 3940  | 4338  | 4285  | 3830  | 3811  | 5121  | 4237  | 4049  | 4886  | 4579  | 4446  | Tmem9     |          |
| Tmem91    | 46    | 45    | 40    | 68    | 133   | 117   | 46    | 62    | 61    | 56    | 79    | 35    | 17    | 40    | 28    | 76    | 44    | 64    | 94    | 85    | 68    | 62    | 51    | 60    | 57    | 39    | 20    | 39    | Tmem91    |          |
| Tmem94    | 2127  | 2752  | 3355  | 2962  | 3190  | 2714  | 2366  | 3675  | 4790  | 5350  | 4984  | 6097  | 5058  | 5204  | 2097  | 2602  | 3405  | 2796  | 3128  | 2215  | 2579  | 5259  | 4279  | 5708  | 5268  | 5916  | 4779  | 5385  | Tmem94    |          |
| Tmem95    | 74    | 65    | 80    | 57    | 46    | 34    | 31    | 16    | 25    | 29    | 46    | 28    | 20    | 22    | 62    | 67    | 46    | 75    | 29    | 45    | 49    | 30    | 27    | 34    | 23    | 19    | 19    | 18    | Tmem95    |          |
| Tmem97    | 1503  | 1782  | 1566  | 1309  | 911   | 1154  | 1060  | 1304  | 1331  | 1306  | 1311  | 1341  | 1429  | 1498  | 1423  | 1509  | 1348  | 1110  | 1124  | 1393  | 1077  | 1029  | 1504  | 1258  | 1229  | 1694  | 1622  | 1639  | Tmem97    |          |
| Tmem98    | 1005  | 967   | 1263  | 732   | 713   | 721   | 736   | 1751  | 1957  | 1697  | 1674  | 2213  | 2146  | 2080  | 960   | 1101  | 1060  | 673   | 814   | 657   | 668   | 1469  | 1723  | 2047  | 1662  | 2951  | 2246  | 2410  | Tmem98    |          |
| Tmem9b    | 1937  | 1937  | 1692  | 1850  | 2121  | 1863  | 2024  | 2207  | 1920  | 1809  | 1787  | 1483  | 1655  | 1638  | 2259  | 1784  | 1854  | 1847  | 1776  | 2215  | 2074  | 2095  | 2076  | 1620  | 1772  | 1554  | 1569  | 1647  | Tmem9b    |          |
| Tmf1      | 5463  | 4444  | 4953  | 5429  | 4947  | 5253  | 5559  | 4752  | 3996  | 4811  | 4220  | 4305  | 4397  | 4708  | 5304  | 4684  | 5076  | 5133  | 4930  | 5279  | 5524  | 4477  | 4122  | 4220  | 4628  | 3864  | 4291  | 4609  | Tmf1      |          |
| Tmie      | 44    | 52    | 68    | 39    | 53    | 23    | 42    | 51    | 64    | 80    | 66    | 26    | 56    | 16    | 58    | 53    | 32    | 37    | 40    | 44    | 47    | 58    | 67    | 38    | 42    | 34    | 13    | 20    | Tmie      |          |
| Tmidg1    | 1     | 0     | 0     | 1     | 1     | 1     | 0     | 0     | 0     | 2     | 5     | 0     | 0     | 0     | 1     | 0     | 2     | 0     | 0     | 0     | 0     | 0     | 2     | 1     | 2     | 0     | 0     | 0     | Tmidg1    |          |
| Tmidg3    | 0     | 2     | 0     | 0     | 0     | 0     | 0     | 0     | 0     | 0     | 0     | 0     | 5     | 0     | 0     | 2     | 0     | 0     | 0     | 1     | 0     | 0     | 0     | 0     | 0     | 0     | 0     | 0     | Tmidg3    |          |
| Tmod1     | 216   | 249   | 182   | 236   | 187   | 170   | 179   | 92    | 152   | 93    | 460   | 84    | 200   | 109   | 191   | 293   | 166   | 220   | 151   | 154   | 147   | 139   | 392   | 74    | 60    | 101   | 98    | 171   | Tmod1     |          |
| Tmod2     | 14715 | 13731 | 9733  | 15124 | 20742 | 20695 | 21425 | 20914 | 17445 | 16837 | 16592 | 15209 | 13397 | 16550 | 16391 | 12950 | 11957 | 16126 | 17309 | 22034 | 21510 | 19524 | 16071 | 13657 | 21117 | 9312  | 15254 | 13897 | Tmod2     |          |
| Tmod3     | 16533 | 13824 | 13750 | 13863 | 12887 | 13528 | 14967 | 9432  | 8496  | 7137  | 7927  | 8443  | 8450  | 8816  | 16719 | 15432 | 13603 | 14270 | 12961 | 15033 | 14220 | 7518  | 8744  | 8037  | 7604  | 8989  | 8606  | 9143  | Tmod3     |          |
| Tmod4     | 107   | 112   | 140   | 120   | 103   | 108   | 127   | 82    | 82    | 96    | 114   | 89    | 87    | 97    | 78    | 98    | 141   | 130   | 146   | 79    | 109   | 104   | 95    | 98    | 100   | 113   | 94    | 95    | Tmod4     |          |
| Tmpo      | 30496 | 22560 | 29175 | 23944 | 24044 | 25989 | 29033 | 40819 | 35446 | 33119 | 36497 | 45970 | 39531 | 47264 | 28397 | 24157 | 27194 | 23022 | 27274 | 27480 | 26815 | 32042 | 33048 | 39648 | 36707 | 49314 | 47236 | 49100 | Tmpo      |          |
| Tmppe     | 479   | 643   | 702   | 667   | 670   | 631   | 502   | 343   | 418   | 425   | 496   | 461   | 476   | 388   | 418   | 588   | 658   | 657   | 628   | 468   | 576   | 444   | 423   | 417   | 450   | 238   | 429   | 412   | Tmppe     |          |
| Tmprss11a | 6     | 0     | 3     | 0     | 0     | 0     | 0     | 9     | 25    | 4     | 10    | 2     | 1     | 0     | 0     | 7     | 0     | 2     | 0     | 0     | 0     | 3     | 28    | 1     | 9     | 0     | 0     | 0     | Tmprss11a |          |
| Tmprss11b | 7     | 0     | 0     | 0     | 2     | 0     | 0     | 24    | 51    | 22    | 66    | 3     | 0     | 2     | 4     | 2     | 0     | 0     | 0     | 0     | 0     | 2     | 61    | 15    | 6     | 2     | 0     | 0     | Tmprss11b |          |
| Tmprss11d | 6     | 2     | 3     | 2     | 0     | 2     | 4     | 5     | 8     | 0     | 1     | 1     | 0     | 3     | 5     | 1     | 0     | 6     | 2     | 4     | 4     | 2     | 5     | 4     | 0     | 1     | 2     | 2     | Tmprss11d |          |
| Tmprss11e | 0     | 0     | 0     | 0     | 0     | 0     | 0     | 1     | 6     | 1     | 2     | 0     | 7     | 0     | 3     | 0     | 2     | 1     | 2     | 0     | 0     | 2     | 4     | 2     | 0     | 3     | 0     | 0     | Tmprss11e |          |
| Tmprss11f | 7     | 1     | 0     | 0     | 0     | 0     | 0     | 1     | 0     | 0     | 5     | 2     | 1     | 2     | 1     | 0     | 0     | 3     | 0     | 0     | 0     | 0     | 1     | 0     | 0     | 0     | 0     | 0     | Tmprss11f |          |
| Tmprss11g | 0     | 0     | 0     | 0     | 0     | 0     | 0     | 0     | 2     | 0     | 2     | 0     | 0     | 0     | 0     | 0     | 0     | 0     | 0     | 1     | 0     | 3     | 1     | 0     | 0     | 0     | 0     | 0     | Tmprss11g |          |
| Tmprss12  | 0     | 0     | 0     | 0     | 0     | 0     | 1     | 1     | 0     | 0     | 0     | 0     | 0     | 0     | 1     | 0     | 3     | 0     | 0     | 0     | 0     | 0     | 2     | 3     | 0     | 1     | 0     | 0     | Tmprss12  |          |
| Tmprss13  | 18    | 10    | 8     | 1     | 0     | 1     | 0     | 40    | 81    | 37    | 16    | 16    | 24    | 6     | 12    | 9     | 5     | 3     | 7     | 0     | 0     | 2     | 2     | 83    | 35    | 2     | 13    | 10    | 7         | Tmprss13 |
| Tmprss15  | 1     | 3     | 0     | 1     | 5     | 2     | 0     | 6     | 2     | 0     | 0     | 0     | 1     | 4     | 5     | 1     | 2     | 2     | 1     | 1     | 0     | 0     | 1     | 3     | 1     | 4     | 8     | 0     | Tmprss15  |          |
| Tmprss2   | 58    | 56    | 47    | 21    | 11    | 38    | 0     | 116   | 138   | 99    | 112   | 48    | 69    | 42    | 90    | 68    | 30    | 41    | 8     | 4     | 4     | 12    | 142   | 118   | 12    | 44    | 38    | 42    | Tmprss2   |          |
| Tmprss3   | 2     | 0     | 0     | 0     | 0     | 0     | 1     | 5     | 7     | 3     | 2     | 0     | 3     | 2     | 1     | 2     | 0     | 0     | 0     | 0     | 1     | 5     | 5     | 2     | 0     | 0     | 1     | 1     | Tmprss3   |          |
| Tmprss4   | 12    | 3     | 0     | 8     | 2     | 3     | 0     | 40    | 26    | 37    | 44    | 1     | 11    | 2     | 7     | 3     | 1     | 2     | 5     | 0     | 1     | 2     | 52    | 77    | 0     | 33    | 0     | 1     | Tmprss4   |          |
| Tmprss5   | 84    | 80    | 73    | 69    | 81    | 88    | 67    | 115   | 129   | 131   | 177   | 163   | 176   | 161   | 76    | 72    | 105   | 87    | 97    | 84    | 54    | 149   | 135   | 140   | 181   | 154   | 164   | 140   | Tmprss5   |          |
| Tmprss6   | 44    | 16    | 0     | 40    | 7     | 4     | 1     | 89    | 63    | 153   | 92    | 5     | 45    | 13    | 26    | 14    | 7     | 1     | 2     | 0     | 3     | 7     | 107   | 161   | 16    | 158   | 3     | 7     | Tmprss6   |          |
| Tmprss7   | 127   | 139   | 106   | 140   | 179   | 167   | 166   | 101   | 105   | 95    | 89    | 166   | 92    | 126   | 131   | 127   | 167   | 213   | 172   | 154   | 176   | 100   | 87    | 113   | 124   | 80    | 148   | 120   | Tmprss7   |          |
| Tmprss9   | 55    | 76    | 58    | 138   | 103   | 74    | 70    | 13    | 15    | 23    | 19    | 16    | 26    | 16    | 51    | 69    | 114   | 180   | 81    | 44    | 75    | 47    | 23    | 23    | 28    | 10    | 12    | 27    | Tmprss9   |          |
| Tmsb10    | 37527 | 50555 | 51037 | 58091 | 56819 | 48096 | 41604 | 46137 | 50696 | 66703 | 59182 | 51879 | 54191 | 52016 | 40788 | 36633 | 55784 | 56126 | 56676 | 49444 | 50860 | 52472 | 53369 | 63992 | 65101 | 59167 | 53843 | 50717 | Tmsb10    |          |
| Tmsb15a   | 0     | 0     | 0     | 0     | 0     | 0     | 0     | 2     | 0     | 1     | 6     | 1     | 5     | 1     | 0     | 0     | 1     | 0     | 1     | 0     | 2     | 2     | 4     | 6     | 3     | 0     | 0     | 5     | Tmsb15a   |          |
| Tmsb15b1  | 30    | 29    | 15    | 12    | 20    | 12    | 47    | 22    | 20    | 10    | 18    | 2     | 14    | 27    | 36    | 16    | 9     | 9     | 16    | 25    | 22    | 18    | 13    | 18    | 16    | 19    | 13    | 15    | Tmsb15b1  |          |
| Tmsb15b2  | 9     | 8     | 13    | 26    | 7     | 11    | 9     | 6     | 7     | 8     | 4     | 4     | 5     | 3     | 8     | 3     | 12    | 7     | 12    | 18    | 16    | 5     | 10    | 20    | 9     | 3     | 8     | 0     | Tmsb15b2  |          |
| Tmsb15l   | 9     | 10    | 2     | 21    | 15    | 12    | 20    | 17    | 4     | 3     | 1     | 7     | 9     | 9     | 12    | 10    | 14    | 14    | 10    | 23    | 18    | 5     | 5     | 15    | 5     | 2     | 2     | 11    | Tmsb15l   |          |
| Tmsb4x    | 59926 | 63017 | 62632 | 66837 | 69494 | 69471 | 83356 | 80156 | 69613 | 71153 | 66584 | 76983 | 78831 | 89593 | 73984 | 61707 | 66329 | 62714 | 71729 | 95876 | 78287 | 65993 | 72247 | 78131 | 79505 | 83481 | 87088 | 90956 | Tmsb4x    |          |
| Tmtc1     | 1351  | 1256  | 961   | 1213  | 1906  | 1533  | 1182  | 1570  | 2015  | 1788  | 2249  | 1339  | 1786  | 1192  | 1439  | 1650  | 1010  | 1569  | 1027  | 1246  | 1296  | 2430  | 2151  | 1268  | 1733  | 757   | 1333  | 1078  | Tmtc1     |          |
| Tmtc2     | 3244  | 2745  | 2766  | 2984  | 2918  | 2726  | 2940  | 3761  | 3648  | 3505  | 3705  | 2727  | 3393  | 2766  | 3389  | 3066  | 3072  | 2793  | 2582  | 2376  | 2691  | 4027  | 3224  | 3120  | 3067  | 2953  | 2722  | 2636  | Tmtc2     |          |
| Tmtc3     | 6737  | 4801  | 4538  | 4770  | 4139  | 5118  | 5127  | 4338  | 4021  | 3557  | 4064  | 4057  | 4238  | 4355  | 6045  | 6214  | 4183  | 4952  | 4036  | 4820  | 4766  | 4263  | 4133  | 3428  | 3419  | 3653  | 4154  | 4144  | Tmtc3     |          |
| Tmtc4     | 3767  | 3380  | 3384  | 3471  | 3850  | 3571  | 3798  | 4209  | 3876  | 3841  | 3661  | 3641  | 3731  | 3662  | 4180  | 3453  | 3610  | 3646  | 3590  | 4012  | 3746  | 4226  | 3952  | 3344  | 3576  | 3392  | 3837  | 3706  | Tmtc4     |          |
| Tmub1     | 773   | 1025  | 896   | 1005  | 904   | 798   | 829   | 662   | 728   | 758   | 743   | 735   | 667   | 698   | 732   | 776   | 968   | 956   | 994   | 840   | 979   | 679   | 719   | 738   | 626   | 724   | 860   | 672   | 680       | Tmub1    |
| Tmub2     | 3111  | 3893  | 3538  | 3483  | 3697  | 3576  | 3429  | 2860  | 3418  | 3461  | 3362  | 3479  | 3497  | 3266  | 3212  | 3381  | 3789  | 3168  | 3965  | 3605  | 3504  | 3390  | 3486  | 3559  | 3600  | 3411  | 3744  | 3393  | Tmub2     |          |
| Tmx1      | 11185 | 8822  | 11617 | 10985 | 11488 | 11034 | 12525 | 10793 | 8466  | 7756  | 8577  | 9160  | 8912  | 9805  | 12792 | 10761 | 10932 | 11308 | 10856 | 13448 | 11722 | 9752  | 9041  | 9262  | 9237  | 10003 | 9610  | 10119 | Tmx1      |          |
| Tmx2      | 6073  | 6280  |       |       |       |       |       |       |       |       |       |       |       |       |       |       |       |       |       |       |       |       |       |       |       |       |       |       |           |          |



|           |       |       |       |       |       |       |       |       |       |       |       |       |       |       |       |       |       |       |       |       |       |       |       |       |       |       |       |       |           |
|-----------|-------|-------|-------|-------|-------|-------|-------|-------|-------|-------|-------|-------|-------|-------|-------|-------|-------|-------|-------|-------|-------|-------|-------|-------|-------|-------|-------|-------|-----------|
| Tnfrsf23  | 181   | 181   | 162   | 223   | 270   | 225   | 215   | 89    | 105   | 81    | 131   | 56    | 70    | 70    | 227   | 229   | 168   | 271   | 200   | 232   | 239   | 115   | 131   | 74    | 87    | 51    | 65    | 50    | Tnfrsf23  |
| Tnfrsf25  | 283   | 383   | 536   | 527   | 466   | 382   | 321   | 195   | 176   | 286   | 331   | 174   | 223   | 179   | 231   | 470   | 552   | 600   | 570   | 395   | 386   | 269   | 214   | 279   | 282   | 236   | 198   | 202   | Tnfrsf25  |
| Tnfrsf26  | 125   | 114   | 136   | 125   | 111   | 120   | 126   | 18    | 23    | 25    | 34    | 52    | 53    | 40    | 135   | 144   | 151   | 166   | 118   | 115   | 101   | 55    | 41    | 48    | 23    | 41    | 43    | 58    | Tnfrsf26  |
| Tnfrsf4   | 76    | 91    | 82    | 109   | 99    | 78    | 111   | 74    | 96    | 120   | 121   | 146   | 107   | 143   | 78    | 76    | 88    | 78    | 103   | 70    | 65    | 100   | 72    | 99    | 125   | 126   | 131   | 113   | Tnfrsf4   |
| Tnfrsf8   | 0     | 3     | 9     | 3     | 6     | 6     | 2     | 11    | 17    | 14    | 16    | 11    | 11    | 14    | 4     | 4     | 10    | 11    | 12    | 4     | 4     | 22    | 16    | 10    | 7     | 23    | 7     | 7     | Tnfrsf8   |
| Tnfrsf9   | 9     | 17    | 19    | 24    | 16    | 15    | 17    | 5     | 24    | 19    | 25    | 5     | 15    | 17    | 18    | 21    | 9     | 30    | 23    | 9     | 7     | 10    | 21    | 32    | 18    | 22    | 10    | 17    | Tnfrsf9   |
| Tnfrsf10  | 5     | 3     | 7     | 2     | 8     | 5     | 1     | 4     | 7     | 25    | 28    | 10    | 7     | 11    | 3     | 5     | 5     | 6     | 9     | 4     | 7     | 15    | 13    | 10    | 13    | 5     | 1     | 7     | Tnfrsf10  |
| Tnfrsf11  | 23    | 14    | 29    | 9     | 10    | 17    | 16    | 17    | 28    | 12    | 31    | 15    | 3     | 16    | 33    | 18    | 17    | 20    | 9     | 15    | 9     | 13    | 19    | 37    | 12    | 34    | 27    | 7     | Tnfrsf11  |
| Tnfrsf12  | 18    | 49    | 44    | 36    | 43    | 30    | 22    | 66    | 85    | 78    | 120   | 52    | 66    | 54    | 40    | 45    | 34    | 39    | 12    | 16    | 27    | 65    | 89    | 83    | 65    | 57    | 56    | 55    | Tnfrsf12  |
| Tnfrsf13  | 7     | 9     | 6     | 2     | 10    | 0     | 9     | 9     | 17    | 7     | 19    | 4     | 5     | 6     | 5     | 8     | 1     | 8     | 3     | 2     | 8     | 10    | 16    | 11    | 4     | 9     | 8     | 8     | Tnfrsf13  |
| Tnfrsf13b | 70    | 95    | 55    | 107   | 65    | 101   | 89    | 38    | 33    | 38    | 34    | 35    | 39    | 44    | 79    | 68    | 71    | 96    | 69    | 84    | 66    | 62    | 31    | 19    | 26    | 34    | 43    | 51    | Tnfrsf13b |
| Tnfrsf14  | 9     | 4     | 4     | 3     | 2     | 2     | 2     | 7     | 10    | 14    | 7     | 10    | 12    | 4     | 5     | 9     | 19    | 7     | 2     | 2     | 7     | 7     | 8     | 5     | 6     | 20    | 14    | 14    | Tnfrsf14  |
| Tnfrsf15  | 10    | 10    | 3     | 6     | 0     | 0     | 1     | 2     | 7     | 8     | 9     | 9     | 20    | 6     | 1     | 12    | 7     | 4     | 0     | 1     | 2     | 5     | 17    | 5     | 4     | 3     | 8     | 8     | Tnfrsf15  |
| Tnfrsf18  | 0     | 0     | 0     | 1     | 2     | 0     | 4     | 2     | 10    | 1     | 14    | 1     | 0     | 4     | 0     | 2     | 0     | 4     | 2     | 0     | 1     | 15    | 11    | 9     | 3     | 6     | 5     | 2     | Tnfrsf18  |
| Tnfrsf4   | 0     | 0     | 1     | 0     | 3     | 0     | 1     | 0     | 2     | 4     | 1     | 0     | 6     | 0     | 3     | 0     | 3     | 0     | 2     | 0     | 1     | 2     | 2     | 0     | 2     | 2     | 0     | 4     | Tnfrsf4   |
| Tnfrsf8   | 0     | 1     | 0     | 0     | 3     | 3     | 4     | 4     | 2     | 7     | 2     | 0     | 2     | 1     | 0     | 0     | 0     | 3     | 7     | 3     | 4     | 2     | 5     | 7     | 3     | 6     | 1     | 0     | Tnfrsf8   |
| Tnfrsf9   | 275   | 278   | 322   | 259   | 320   | 273   | 304   | 164   | 138   | 165   | 164   | 215   | 181   | 234   | 240   | 222   | 345   | 253   | 351   | 301   | 341   | 145   | 144   | 174   | 179   | 247   | 199   | 159   | Tnfrsf9   |
| Tnfrsfm13 | 1     | 2     | 1     | 4     | 0     | 2     | 1     | 4     | 6     | 10    | 2     | 2     | 1     | 9     | 0     | 5     | 0     | 1     | 1     | 2     | 1     | 2     | 3     | 2     | 2     | 1     | 1     | 7     | Tnfrsfm13 |
| Tnik      | 5174  | 5122  | 4089  | 6543  | 10065 | 9013  | 9342  | 11053 | 10683 | 11903 | 10398 | 8657  | 9801  | 9548  | 6398  | 5811  | 5353  | 7339  | 7877  | 8606  | 9211  | 13094 | 9599  | 9392  | 12557 | 4527  | 8692  | 7630  | Tnik      |
| Tnrip1    | 633   | 771   | 879   | 793   | 752   | 595   | 571   | 872   | 1172  | 1076  | 1265  | 959   | 1122  | 875   | 683   | 856   | 877   | 863   | 767   | 594   | 572   | 1111  | 1218  | 1111  | 958   | 1108  | 945   | 946   | Tnrip1    |
| Tnrip2    | 807   | 849   | 873   | 793   | 781   | 794   | 674   | 368   | 504   | 478   | 609   | 396   | 432   | 410   | 749   | 830   | 816   | 815   | 703   | 734   | 701   | 421   | 543   | 475   | 411   | 461   | 476   | 444   | Tnrip2    |
| Tnrip3    | 2     | 1     | 0     | 1     | 0     | 0     | 0     | 0     | 2     | 1     | 0     | 9     | 1     | 1     | 1     | 0     | 0     | 0     | 0     | 0     | 0     | 0     | 1     | 2     | 6     | 3     | 3     | 2     | Tnrip3    |
| Tnk1      | 100   | 46    | 16    | 21    | 11    | 9     | 7     | 74    | 119   | 93    | 92    | 24    | 51    | 15    | 34    | 45    | 15    | 23    | 7     | 7     | 3     | 20    | 113   | 88    | 1     | 114   | 21    | 27    | Tnk1      |
| Tnk2      | 6312  | 8502  | 8937  | 10521 | 9905  | 9106  | 8773  | 4770  | 5900  | 7033  | 6560  | 7005  | 6004  | 6054  | 5978  | 6920  | 9936  | 10789 | 10922 | 7770  | 9089  | 6293  | 5339  | 7258  | 7153  | 7760  | 6513  | 6037  | Tnk2      |
| Tnk3      | 20891 | 18846 | 13237 | 18222 | 21368 | 21923 | 22550 | 22313 | 20821 | 18978 | 19156 | 17826 | 18548 | 18790 | 20969 | 19355 | 16112 | 18959 | 19214 | 20787 | 23285 | 21031 | 18724 | 15604 | 21003 | 11282 | 18121 | 17255 | Tnk3      |
| Tnks1bp1  | 7251  | 9417  | 10152 | 10306 | 9576  | 9159  | 8328  | 5145  | 6615  | 6850  | 7379  | 6675  | 6901  | 6641  | 6767  | 8530  | 10445 | 10309 | 10304 | 7672  | 8779  | 6251  | 6325  | 6821  | 6802  | 6207  | 6548  | 6579  | Tnks1bp1  |
| Tnks2     | 39233 | 34741 | 33178 | 35005 | 33900 | 36043 | 35624 | 37742 | 30565 | 28528 | 29913 | 31207 | 30953 | 30334 | 40081 | 36443 | 34068 | 35050 | 34249 | 38202 | 35827 | 32392 | 31713 | 28381 | 30506 | 26033 | 32891 | 30882 | Tnks2     |
| Tnmd      | 722   | 650   | 402   | 466   | 36    | 723   | 8     | 613   | 679   | 520   | 662   | 760   | 890   | 918   | 1030  | 648   | 552   | 716   | 35    | 44    | 12    | 628   | 1153  | 710   | 552   | 397   | 880   | 777   | Tnmd      |
| Tnn       | 115   | 15    | 6     | 187   | 15    | 362   | 2     | 198   | 395   | 461   | 402   | 111   | 102   | 171   | 21    | 19    | 21    | 384   | 41    | 7     | 2     | 531   | 572   | 417   | 607   | 38    | 80    | 52    | Tnn       |
| Tnnc1     | 136   | 39    | 51    | 52    | 94    | 53    | 53    | 155   | 442   | 131   | 2682  | 52    | 132   | 48    | 54    | 111   | 68    | 57    | 49    | 38    | 52    | 307   | 1591  | 98    | 68    | 46    | 66    | 37    | Tnnc1     |
| Tnnc2     | 60    | 32    | 14    | 32    | 47    | 19    | 41    | 66    | 126   | 14    | 1399  | 9     | 34    | 4     | 26    | 52    | 41    | 37    | 26    | 26    | 30    | 77    | 783   | 25    | 27    | 12    | 8     | 11    | Tnnc2     |
| Tnni1     | 100   | 17    | 12    | 13    | 33    | 13    | 13    | 122   | 339   | 38    | 2557  | 22    | 75    | 19    | 51    | 95    | 25    | 17    | 5     | 10    | 10    | 202   | 1576  | 51    | 41    | 17    | 17    | 9     | Tnni1     |
| Tnni2     | 10    | 2     | 17    | 5     | 13    | 6     | 8     | 26    | 62    | 16    | 529   | 8     | 9     | 11    | 16    | 14    | 0     | 1     | 4     | 10    | 2     | 18    | 316   | 33    | 9     | 14    | 3     | 20    | Tnni2     |
| Tnni3     | 746   | 1069  | 1350  | 1068  | 547   | 672   | 703   | 138   | 133   | 169   | 136   | 174   | 204   | 234   | 719   | 974   | 1088  | 802   | 615   | 571   | 570   | 150   | 164   | 172   | 151   | 251   | 164   | 233   | Tnni3     |
| Tnni3k    | 2     | 2     | 2     | 0     | 2     | 0     | 7     | 1     | 7     | 3     | 3     | 4     | 7     | 2     | 3     | 2     | 0     | 2     | 1     | 14    | 2     | 12    | 10    | 2     | 2     | 3     | 5     | 4     | Tnni3k    |
| Tnnt1     | 262   | 187   | 215   | 154   | 128   | 118   | 120   | 333   | 637   | 227   | 3719  | 230   | 380   | 184   | 191   | 310   | 190   | 130   | 114   | 138   | 103   | 448   | 2057  | 247   | 174   | 211   | 200   | 228   | Tnnt1     |
| Tnnt2     | 103   | 28    | 8     | 20    | 32    | 14    | 12    | 126   | 341   | 64    | 2655  | 16    | 107   | 17    | 44    | 84    | 23    | 9     | 16    | 5     | 10    | 196   | 1440  | 56    | 37    | 15    | 27    | 17    | Tnnt2     |
| Tnnt3     | 39    | 34    | 32    | 8     | 38    | 21    | 7     | 83    | 169   | 76    | 1659  | 54    | 75    | 32    | 36    | 43    | 24    | 33    | 19    | 10    | 11    | 125   | 981   | 47    | 53    | 24    | 45    | 42    | Tnnt3     |
| Tnp01     | 33322 | 27479 | 23268 | 24920 | 24414 | 28122 | 26832 | 38844 | 30838 | 26341 | 28199 | 32505 | 32447 | 35276 | 33367 | 28893 | 22791 | 23112 | 23610 | 30616 | 26930 | 28600 | 30327 | 25884 | 30040 | 25345 | 36839 | 35087 | Tnp01     |
| Tnp02     | 10912 | 12731 | 14576 | 16811 | 16520 | 14345 | 16036 | 10911 | 11478 | 13577 | 13641 | 14037 | 13385 | 15224 | 10669 | 10554 | 16890 | 16693 | 17861 | 13110 | 16698 | 13607 | 10930 | 15119 | 15647 | 13718 | 13739 | 15165 | Tnp02     |
| Tnp03     | 15052 | 14000 | 12869 | 11374 | 11240 | 12058 | 12987 | 15245 | 13008 | 11685 | 10943 | 13688 | 13027 | 13919 | 15217 | 12763 | 12448 | 11119 | 11871 | 13705 | 12028 | 12641 | 12653 | 12498 | 12825 | 14154 | 14633 | 14356 | Tnp03     |
| Tnr       | 340   | 400   | 155   | 762   | 1385  | 1265  | 1210  | 1054  | 1350  | 1259  | 935   | 686   | 417   | 622   | 438   | 364   | 381   | 877   | 1087  | 1207  | 1375  | 1407  | 1023  | 789   | 1576  | 312   | 506   | 440   | Tnr       |
| Tnrc18    | 6409  | 7978  | 9697  | 10453 | 11618 | 9900  | 8390  | 14867 | 19722 | 24224 | 22163 | 25930 | 21045 | 21635 | 5952  | 7137  | 10857 | 10318 | 12124 | 8114  | 9192  | 22688 | 17366 | 27489 | 25463 | 23733 | 20382 | 19490 | Tnrc18    |
| Tnrc6a    | 12048 | 11902 | 9426  | 11728 | 13375 | 13435 | 13123 | 17002 | 15788 | 16764 | 17135 | 17302 | 17476 | 17875 | 12228 | 11445 | 11324 | 11375 | 12157 | 12733 | 13739 | 15151 | 14687 | 14153 | 17358 | 11193 | 18439 | 16400 | Tnrc6a    |
| Tnrc6b    | 7048  | 6499  | 5795  | 7452  | 8283  | 8817  | 7842  | 10418 | 10112 | 9732  | 11086 | 10220 | 10713 | 10465 | 7109  | 6801  | 6486  | 7353  | 7014  | 7925  | 8868  | 9727  | 9281  | 8806  | 11391 | 9278  | 11916 | 9634  | Tnrc6b    |
| Tnrc6c    | 10293 | 11540 | 11477 | 15976 | 16233 | 15410 | 14477 | 11351 | 12763 | 14819 | 13868 | 14478 | 13277 | 13171 | 9844  | 10963 | 13874 | 15597 | 16100 | 12989 | 15152 | 14840 | 10905 | 14442 | 16730 | 7120  | 13476 | 12104 | Tnrc6c    |
| Tns1      | 3319  | 3432  | 3484  | 3015  | 3184  | 3479  | 2152  | 3832  | 5256  | 5164  | 6779  | 4784  | 5784  | 4147  | 2960  | 4159  | 3211  | 3861  | 2844  | 2067  | 2309  | 4871  | 5956  | 5110  | 4362  | 3892  | 4431  | 4440  | Tns1      |
| Tns2      | 612   | 642   | 756   | 741   | 668   | 728   | 450   | 1454  | 2471  | 2754  | 3574  | 1634  | 2082  | 1376  | 525   | 744   | 706   | 731   | 648   | 470   | 466   | 2366  | 2585  | 2441  | 1733  | 2192  | 1653  | 1404  | Tns2      |
| Tns3      | 3617  | 3181  | 3136  | 2414  | 2309  | 2760  | 1787  | 5859  | 7992  | 7236  | 8855  | 5553  | 7841  | 5224  | 3061  | 4184  | 2734  | 2742  | 2144  | 1706  | 1855  | 5748  | 7921  | 6876  | 5474  | 6255  | 6393  | 5525  | Tns3      |
| Tns4      | 77    | 94    | 100   | 10    | 7     | 21    | 11    | 44    | 49    | 29    | 29    | 40    | 51    | 32    | 96    | 115   | 24    | 39    | 5     | 4     | 2     | 12    | 88    | 39    | 19    | 24    | 44    | 57    | Tns4      |
| Tnbx      | 24    | 29    | 33    | 66    | 129   | 72    | 40    | 59    | 60    | 80    | 186   | 30    | 62    | 51    | 20    | 37    | 30    | 64    | 52    | 33    | 60    | 95    | 179   | 58    | 97    | 53    | 35    | 32    | Tnbx      |
| Tob1      | 2366  | 2231  | 2846  | 3401  | 2603  | 2536  | 3102  | 2093  | 2027  | 2195  | 2206  | 2463  |       |       |       |       |       |       |       |       |       |       |       |       |       |       |       |       |           |



|          |       |       |       |       |       |       |       |       |       |       |       |       |       |       |       |       |       |       |       |       |       |       |       |       |       |       |       |        |          |        |
|----------|-------|-------|-------|-------|-------|-------|-------|-------|-------|-------|-------|-------|-------|-------|-------|-------|-------|-------|-------|-------|-------|-------|-------|-------|-------|-------|-------|--------|----------|--------|
| Trap1a   | 2     | 1     | 0     | 0     | 1     | 0     | 1     | 1     | 5     | 4     | 0     | 2     | 1     | 0     | 0     | 7     | 10    | 0     | 4     | 3     | 1     | 0     | 3     | 1     | 9     | 3     | 2     | 0      | Trap1a   |        |
| Trappc1  | 6950  | 6669  | 6082  | 6223  | 5105  | 5166  | 6615  | 5168  | 4294  | 3892  | 3949  | 4290  | 4588  | 5077  | 7636  | 5949  | 6164  | 5930  | 5777  | 7151  | 6270  | 4478  | 4181  | 4463  | 4139  | 5048  | 5229  | 5211   | Trappc1  |        |
| Trappc10 | 6580  | 7524  | 5301  | 7483  | 7445  | 7653  | 7487  | 5688  | 5857  | 6040  | 5885  | 6133  | 5574  | 5566  | 6393  | 6200  | 6431  | 7578  | 7381  | 6751  | 7994  | 6253  | 5364  | 5700  | 6795  | 4628  | 5871  | 5676   | Trappc10 |        |
| Trappc11 | 10135 | 11204 | 8182  | 9335  | 8206  | 8478  | 9250  | 6878  | 6635  | 5327  | 5856  | 6093  | 6136  | 6179  | 10437 | 10101 | 8713  | 9183  | 8170  | 9806  | 9187  | 6142  | 6417  | 5687  | 5941  | 5778  | 6202  | 6165   | Trappc11 |        |
| Trappc12 | 2742  | 3117  | 2784  | 2742  | 2625  | 2672  | 2742  | 3351  | 3896  | 3469  | 3385  | 3775  | 3432  | 3438  | 2680  | 2739  | 2799  | 2671  | 2895  | 2757  | 2789  | 3135  | 3829  | 3253  | 3590  | 3611  | 3550  | 3366   | Trappc12 |        |
| Trappc13 | 4411  | 4074  | 4646  | 4702  | 4160  | 3927  | 4819  | 4197  | 3364  | 3441  | 3385  | 3775  | 3460  | 4029  | 4807  | 4449  | 4475  | 4524  | 4237  | 4735  | 4383  | 3417  | 3592  | 3838  | 3665  | 4019  | 3793  | 4062   | Trappc13 |        |
| Trappc14 | 3448  | 5037  | 4371  | 5435  | 5447  | 4362  | 5045  | 3306  | 3533  | 3993  | 3569  | 3656  | 3345  | 3757  | 3653  | 3637  | 5304  | 5463  | 5480  | 4287  | 5046  | 3940  | 3178  | 3936  | 4236  | 4020  | 3521  | 3501   | Trappc14 |        |
| Trappc2  | 1886  | 1562  | 1759  | 2082  | 2113  | 1988  | 2472  | 2175  | 1729  | 1503  | 1592  | 1662  | 1744  | 1828  | 2314  | 1852  | 1842  | 2152  | 2014  | 2615  | 2264  | 2132  | 1710  | 1837  | 2041  | 1596  | 1672  | 1912   | Trappc2  |        |
| Trappc2l | 1353  | 1450  | 1235  | 1432  | 1546  | 1338  | 1573  | 1671  | 1565  | 1481  | 1515  | 1412  | 1496  | 1669  | 1630  | 1210  | 1457  | 1413  | 1451  | 1654  | 1596  | 1564  | 1647  | 1600  | 1523  | 1455  | 1489  | 1708   | Trappc2l |        |
| Trappc3  | 4755  | 5186  | 5374  | 5433  | 5218  | 4858  | 5291  | 4466  | 4447  | 4747  | 4523  | 4398  | 4361  | 4517  | 5018  | 4910  | 5500  | 5302  | 5509  | 5942  | 5437  | 4286  | 4697  | 4829  | 5102  | 4899  | 4567  | 4812   | Trappc3  |        |
| Trappc3l | 1     | 1     | 0     | 0     | 4     | 0     | 0     | 5     | 1     | 3     | 4     | 3     | 0     | 0     | 1     | 1     | 0     | 0     | 0     | 0     | 1     | 3     | 3     | 3     | 7     | 0     | 9     | 1      | Trappc3l |        |
| Trappc4  | 3222  | 3867  | 3291  | 3717  | 3547  | 3398  | 3553  | 4427  | 3996  | 3990  | 3618  | 4316  | 4141  | 4452  | 3578  | 3104  | 3612  | 3394  | 3613  | 4138  | 3697  | 4172  | 3955  | 4098  | 4128  | 4168  | 4443  | 4600   | Trappc4  |        |
| Trappc5  | 2962  | 3393  | 3135  | 3640  | 3641  | 3465  | 3277  | 3151  | 3055  | 3600  | 3244  | 3477  | 3525  | 3397  | 3137  | 2709  | 3525  | 3252  | 3630  | 3758  | 3393  | 2996  | 3043  | 3678  | 3443  | 3767  | 3588  | 3452   | Trappc5  |        |
| Trappc6a | 568   | 613   | 557   | 572   | 501   | 500   | 402   | 431   | 490   | 497   | 457   | 535   | 518   | 434   | 475   | 594   | 570   | 541   | 523   | 556   | 413   | 361   | 498   | 550   | 438   | 638   | 554   | 483    | Trappc6a |        |
| Trappc6b | 2233  | 1923  | 2691  | 2645  | 2740  | 2570  | 2813  | 2888  | 2611  | 3343  | 2811  | 2999  | 2768  | 3451  | 2342  | 1826  | 2671  | 2431  | 2583  | 2614  | 2716  | 3218  | 2643  | 3317  | 3151  | 3210  | 2961  | 3256   | Trappc6b |        |
| Trappc8  | 6568  | 5833  | 5260  | 5594  | 5852  | 5964  | 6090  | 7072  | 6305  | 5829  | 6123  | 6104  | 5871  | 6189  | 6613  | 5738  | 5282  | 5743  | 5577  | 5918  | 6134  | 6625  | 6188  | 5531  | 6436  | 4996  | 6011  | 5860   | Trappc8  |        |
| Trappc9  | 2809  | 3539  | 2826  | 3463  | 3507  | 3334  | 2991  | 2402  | 3047  | 3357  | 2912  | 3239  | 3047  | 2982  | 2558  | 2984  | 3164  | 3425  | 3638  | 2732  | 3238  | 3272  | 2951  | 3090  | 3217  | 3282  | 2676  | 2959   | Trappc9  |        |
| Trarg1   | 17    | 32    | 26    | 30    | 56    | 31    | 10    | 40    | 56    | 20    | 37    | 2     | 28    | 2     | 21    | 29    | 32    | 23    | 16    | 4     | 6     | 45    | 36    | 5     | 31    | 5     | 2     | 0      | Trarg1   |        |
| Trat1    | 50    | 78    | 29    | 86    | 31    | 62    | 72    | 9     | 8     | 10    | 15    | 8     | 15    | 4     | 91    | 77    | 65    | 129   | 48    | 36    | 94    | 18    | 12    | 5     | 1     | 2     | 14    | 9      | Trat1    |        |
| Trdmt1   | 917   | 703   | 607   | 728   | 772   | 800   | 866   | 915   | 822   | 706   | 846   | 847   | 797   | 910   | 989   | 733   | 670   | 634   | 620   | 753   | 869   | 809   | 874   | 853   | 771   | 754   | 853   | 858    | Trdmt1   |        |
| Trdn     | 5     | 2     | 1     | 1     | 1     | 0     | 1     | 10    | 38    | 10    | 210   | 2     | 3     | 7     | 7     | 4     | 1     | 2     | 6     | 3     | 3     | 18    | 156   | 2     | 5     | 2     | 3     | 2      | Trdn     |        |
| Treh     | 0     | 0     | 0     | 0     | 0     | 2     | 0     | 0     | 0     | 0     | 0     | 0     | 0     | 0     | 0     | 0     | 0     | 0     | 0     | 0     | 0     | 0     | 0     | 0     | 0     | 0     | 0     | 0      | 0        | Treh   |
| Trem1    | 0     | 0     | 0     | 0     | 0     | 0     | 0     | 0     | 0     | 0     | 0     | 0     | 0     | 0     | 0     | 0     | 0     | 1     | 0     | 0     | 0     | 0     | 0     | 0     | 0     | 0     | 0     | 1      | 0        | Trem1  |
| Trem2    | 2     | 2     | 3     | 12    | 0     | 2     | 2     | 6     | 6     | 0     | 6     | 3     | 2     | 4     | 4     | 11    | 1     | 6     | 2     | 7     | 13    | 28    | 3     | 2     | 2     | 2     | 30    | 4      | Trem2    |        |
| Trem3    | 0     | 0     | 0     | 0     | 0     | 0     | 0     | 0     | 0     | 0     | 0     | 0     | 0     | 0     | 0     | 2     | 0     | 0     | 0     | 0     | 0     | 0     | 0     | 0     | 0     | 0     | 0     | 0      | 0        | Trem3  |
| Trem1l   | 2     | 5     | 1     | 0     | 0     | 0     | 2     | 1     | 5     | 0     | 3     | 14    | 6     | 1     | 23    | 0     | 1     | 1     | 2     | 1     | 2     | 1     | 7     | 2     | 20    | 0     | 6     | 5      | 0        | Trem1l |
| Trem12   | 1     | 3     | 8     | 0     | 1     | 1     | 0     | 2     | 2     | 1     | 6     | 9     | 2     | 2     | 0     | 10    | 1     | 0     | 1     | 1     | 1     | 1     | 2     | 0     | 0     | 1     | 17    | 2      | 8        | Trem12 |
| Trerf1   | 0     | 0     | 0     | 0     | 0     | 0     | 0     | 0     | 0     | 1     | 0     | 0     | 0     | 0     | 0     | 0     | 0     | 0     | 0     | 0     | 0     | 0     | 0     | 0     | 0     | 0     | 0     | 0      | 0        | Trerf1 |
| Trex2    | 2     | 0     | 0     | 1     | 0     | 0     | 0     | 1     | 1     | 0     | 0     | 0     | 11    | 2     | 0     | 4     | 0     | 0     | 0     | 0     | 0     | 1     | 0     | 3     | 1     | 0     | 0     | 0      | 0        | Trex2  |
| Trf      | 689   | 914   | 737   | 665   | 905   | 916   | 684   | 844   | 1108  | 915   | 1065  | 894   | 961   | 775   | 766   | 1046  | 664   | 812   | 755   | 884   | 740   | 1086  | 1251  | 797   | 993   | 874   | 881   | 746    | Trf      |        |
| Trh      | 55    | 57    | 56    | 45    | 95    | 43    | 70    | 92    | 104   | 89    | 63    | 89    | 35    | 113   | 74    | 34    | 68    | 78    | 84    | 67    | 87    | 129   | 119   | 80    | 117   | 109   | 119   | 102    | Trh      |        |
| Trhde    | 325   | 314   | 170   | 317   | 650   | 528   | 413   | 813   | 694   | 606   | 626   | 267   | 474   | 335   | 429   | 431   | 302   | 435   | 449   | 412   | 460   | 909   | 598   | 313   | 610   | 263   | 300   | 293    | Trhde    |        |
| Trhr     | 8     | 19    | 20    | 29    | 46    | 16    | 29    | 45    | 68    | 49    | 77    | 28    | 53    | 15    | 28    | 17    | 21    | 35    | 48    | 38    | 46    | 55    | 78    | 28    | 54    | 8     | 35    | 26     | Trhr     |        |
| Trhr2    | 3     | 0     | 0     | 0     | 3     | 5     | 0     | 7     | 15    | 15    | 53    | 4     | 6     | 5     | 0     | 5     | 1     | 1     | 3     | 0     | 1     | 25    | 9     | 14    | 7     | 8     | 3     | 9      | Trhr2    |        |
| Triap1   | 1688  | 2038  | 2052  | 1867  | 1397  | 1418  | 1721  | 1116  | 1081  | 1076  | 1054  | 1234  | 1157  | 1398  | 1615  | 1701  | 1839  | 1734  | 1444  | 1744  | 1465  | 959   | 1237  | 1308  | 1262  | 1543  | 1339  | 1372   | Triap1   |        |
| Trib1    | 1057  | 1002  | 1539  | 1452  | 1576  | 1341  | 1278  | 1215  | 1233  | 1501  | 1533  | 1597  | 1588  | 1527  | 916   | 1004  | 1438  | 1350  | 1606  | 1174  | 1333  | 1477  | 1271  | 1589  | 1385  | 1882  | 1548  | 1604   | Trib1    |        |
| Trib2    | 4541  | 4161  | 5298  | 6166  | 8461  | 6836  | 7591  | 10390 | 10615 | 11742 | 11638 | 9765  | 9837  | 10658 | 4950  | 4264  | 6036  | 6458  | 8013  | 6673  | 7519  | 13754 | 9890  | 11154 | 12921 | 9595  | 8915  | 9700   | Trib2    |        |
| Trib3    | 93    | 125   | 88    | 107   | 81    | 114   | 82    | 81    | 108   | 97    | 94    | 122   | 338   | 160   | 59    | 121   | 98    | 83    | 108   | 115   | 75    | 40    | 111   | 96    | 63    | 134   | 134   | 206    | Trib3    |        |
| Tril     | 2422  | 2128  | 2860  | 1155  | 1136  | 1685  | 877   | 2652  | 3483  | 3093  | 4142  | 3575  | 5040  | 3091  | 2033  | 3062  | 1593  | 1413  | 1240  | 889   | 869   | 3055  | 4253  | 2898  | 2193  | 4647  | 3958  | 4326   | Tril     |        |
| Trim10   | 235   | 289   | 289   | 131   | 86    | 140   | 108   | 147   | 215   | 142   | 113   | 321   | 1013  | 427   | 227   | 278   | 183   | 95    | 129   | 206   | 128   | 97    | 223   | 101   | 137   | 458   | 523   | 898    | Trim10   |        |
| Trim11   | 2478  | 3318  | 2854  | 3062  | 2455  | 2789  | 2462  | 1661  | 1912  | 2006  | 2077  | 1976  | 2098  | 1964  | 2147  | 3027  | 2825  | 3134  | 2670  | 2364  | 2388  | 1890  | 1832  | 2108  | 2044  | 2206  | 2101  | 1915   | Trim11   |        |
| Trim12a  | 276   | 192   | 222   | 166   | 135   | 266   | 107   | 310   | 407   | 377   | 418   | 263   | 396   | 266   | 244   | 307   | 124   | 250   | 109   | 188   | 113   | 334   | 491   | 213   | 233   | 252   | 285   | 256    | Trim12a  |        |
| Trim12c  | 756   | 481   | 559   | 505   | 468   | 521   | 430   | 794   | 769   | 662   | 803   | 560   | 786   | 620   | 649   | 818   | 501   | 529   | 457   | 571   | 439   | 663   | 1042  | 633   | 659   | 678   | 607   | 660    | Trim12c  |        |
| Trim13   | 2148  | 1830  | 1480  | 1814  | 1999  | 1922  | 2275  | 2243  | 1924  | 1643  | 1473  | 1567  | 1486  | 1621  | 2463  | 1709  | 1749  | 1812  | 2014  | 2538  | 2232  | 2052  | 1892  | 1600  | 1768  | 1532  | 1421  | 1620   | Trim13   |        |
| Trim14   | 38    | 28    | 23    | 20    | 39    | 24    | 18    | 15    | 21    | 28    | 46    | 7     | 15    | 24    | 26    | 49    | 24    | 24    | 16    | 24    | 14    | 15    | 38    | 34    | 23    | 30    | 34    | 17     | Trim14   |        |
| Trim15   | 5     | 10    | 1     | 8     | 1     | 1     | 1     | 6     | 8     | 0     | 5     | 10    | 9     | 6     | 0     | 7     | 0     | 2     | 2     | 0     | 3     | 5     | 10    | 2     | 2     | 4     | 3     | 13     | Trim15   |        |
| Trim16   | 616   | 410   | 431   | 331   | 484   | 437   | 332   | 794   | 804   | 754   | 820   | 587   | 685   | 501   | 584   | 537   | 382   | 436   | 412   | 337   | 343   | 612   | 893   | 680   | 522   | 571   | 581   | 503    | Trim16   |        |
| Trim17   | 98    | 129   | 73    | 294   | 200   | 165   | 301   | 84    | 108   | 125   | 107   | 80    | 67    | 85    | 141   | 92    | 184   | 278   | 158   | 206   | 257   | 105   | 116   | 123   | 105   | 54    | 58    | 53     | Trim17   |        |
| Trim2    | 14056 | 14146 | 13517 | 15879 | 21012 | 20239 | 20195 | 21623 | 18299 | 19892 | 16443 | 19461 | 19771 | 20096 | 17205 | 14207 | 15667 | 16733 | 19124 | 19607 | 21081 | 21286 | 16454 | 17678 | 22821 | 11263 | 21169 | 19263  | Trim2    |        |
| Trim21   | 236   | 187   | 274   | 167   | 178   | 187   | 102   | 267   | 302   | 267   | 340   | 263   | 286   | 237   | 249   | 174   | 166   | 147   | 207   | 153   | 244   | 390   | 293   | 219   | 349   | 293   | 293   | Trim21 |          |        |
| Trim23   | 4947  | 3814  | 4409  | 4593  | 4644  | 4694  | 5453  | 5440  | 4519  | 4069  | 4434  | 4387  | 4223  | 4648  | 5366  | 4610  | 4242  | 4665  | 4415  | 5456  | 4973  | 4928  | 4752  | 4328  | 4632  | 4408  | 4489  | 4514   | Trim23   |        |
|          |       |       |       |       |       |       |       |       |       |       |       |       |       |       |       |       |       |       |       |       |       |       |       |       |       |       |       |        |          |        |

|         |       |       |        |       |       |       |       |       |       |       |       |       |       |       |       |       |       |       |       |       |       |       |       |       |       |       |       |       |         |         |
|---------|-------|-------|--------|-------|-------|-------|-------|-------|-------|-------|-------|-------|-------|-------|-------|-------|-------|-------|-------|-------|-------|-------|-------|-------|-------|-------|-------|-------|---------|---------|
| Trim45  | 1205  | 1410  | 1225   | 1456  | 1355  | 1369  | 1219  | 1406  | 1476  | 1584  | 1429  | 1490  | 1627  | 1395  | 1171  | 1200  | 1451  | 1369  | 1401  | 1181  | 1294  | 1497  | 1471  | 1472  | 1510  | 1535  | 1562  | 1418  | Trim45  |         |
| Trim46  | 1615  | 2216  | 2274   | 3291  | 4120  | 3270  | 3086  | 3197  | 3903  | 4725  | 3908  | 3794  | 3113  | 3192  | 1646  | 1796  | 2927  | 3287  | 4032  | 2768  | 3272  | 5320  | 3446  | 4622  | 5397  | 3089  | 3201  | 2948  | Trim46  |         |
| Trim47  | 119   | 140   | 162    | 141   | 164   | 147   | 120   | 118   | 198   | 201   | 308   | 99    | 154   | 146   | 109   | 174   | 114   | 195   | 150   | 96    | 128   | 162   | 225   | 162   | 141   | 131   | 113   | 119   | Trim47  |         |
| Trim5   | 32    | 16    | 36     | 8     | 20    | 26    | 7     | 26    | 26    | 35    | 43    | 20    | 39    | 23    | 38    | 34    | 16    | 25    | 12    | 31    | 9     | 32    | 71    | 15    | 33    | 17    | 29    | 38    | Trim5   |         |
| Trim50  | 0     | 2     | 0      | 0     | 0     | 0     | 0     | 1     | 0     | 2     | 1     | 0     | 0     | 5     | 0     | 0     | 3     | 1     | 0     | 0     | 0     | 0     | 1     | 1     | 0     | 2     | 0     | 0     | Trim50  |         |
| Trim52  | 0     | 0     | 0      | 0     | 0     | 1     | 0     | 0     | 0     | 0     | 0     | 0     | 0     | 0     | 0     | 0     | 0     | 0     | 0     | 0     | 0     | 0     | 0     | 0     | 0     | 0     | 0     | 0     | Trim52  |         |
| Trim54  | 2     | 1     | 1      | 0     | 0     | 0     | 0     | 2     | 18    | 3     | 115   | 0     | 2     | 0     | 1     | 2     | 0     | 0     | 0     | 0     | 0     | 15    | 71    | 1     | 4     | 0     | 0     | 0     | Trim54  |         |
| Trim55  | 36    | 4     | 0      | 0     | 6     | 4     | 1     | 37    | 124   | 6     | 890   | 0     | 18    | 0     | 9     | 25    | 0     | 4     | 0     | 4     | 0     | 60    | 524   | 10    | 11    | 0     | 1     | 0     | Trim55  |         |
| Trim56  | 1440  | 1260  | 1341   | 1342  | 1479  | 1383  | 1269  | 1570  | 1757  | 1858  | 2088  | 2105  | 2418  | 2395  | 1199  | 1411  | 1198  | 1263  | 1386  | 1188  | 1269  | 1342  | 1836  | 1965  | 1816  | 1577  | 2238  | 2182  | Trim56  |         |
| Trim58  | 2     | 5     | 5      | 0     | 5     | 4     | 3     | 12    | 21    | 8     | 18    | 30    | 103   | 28    | 7     | 4     | 5     | 4     | 2     | 6     | 8     | 10    | 10    | 11    | 3     | 17    | 35    | 72    | Trim58  |         |
| Trim59  | 7973  | 5315  | 8216   | 6588  | 5967  | 6503  | 7381  | 9149  | 7303  | 7650  | 7104  | 11144 | 9821  | 10917 | 7001  | 6459  | 7406  | 6576  | 7303  | 6569  | 7062  | 7454  | 7034  | 9316  | 8386  | 13280 | 11665 | 12394 | Trim59  |         |
| Trim6   | 323   | 276   | 389    | 119   | 145   | 171   | 122   | 61    | 82    | 62    | 113   | 113   | 147   | 94    | 34    | 322   | 363   | 228   | 141   | 111   | 129   | 117   | 97    | 102   | 113   | 37    | 169   | 169   | 123     | Trim6   |
| Trim60  | 16    | 10    | 7      | 13    | 7     | 1     | 15    | 9     | 3     | 4     | 0     | 1     | 0     | 1     | 16    | 9     | 9     | 20    | 5     | 4     | 13    | 2     | 1     | 0     | 0     | 0     | 0     | 2     | Trim60  |         |
| Trim61  | 27    | 15    | 26     | 16    | 20    | 23    | 29    | 7     | 3     | 5     | 7     | 2     | 1     | 6     | 28    | 10    | 24    | 23    | 25    | 12    | 16    | 2     | 8     | 5     | 1     | 17    | 2     | 11    | Trim61  |         |
| Trim62  | 3854  | 4717  | 4063   | 5041  | 5607  | 4884  | 4314  | 1905  | 2096  | 2552  | 2311  | 2265  | 2422  | 1861  | 3819  | 4888  | 4887  | 5477  | 5054  | 3774  | 4689  | 2797  | 1956  | 2207  | 2277  | 2288  | 1921  | 1860  | Trim62  |         |
| Trim63  | 16    | 6     | 8      | 6     | 11    | 11    | 2     | 32    | 29    | 36    | 194   | 26    | 31    | 11    | 7     | 12    | 2     | 9     | 3     | 3     | 3     | 47    | 124   | 22    | 14    | 25    | 8     | 23    | Trim63  |         |
| Trim65  | 114   | 131   | 219    | 132   | 155   | 137   | 130   | 220   | 270   | 359   | 345   | 258   | 268   | 319   | 82    | 104   | 174   | 178   | 150   | 100   | 139   | 339   | 323   | 351   | 316   | 360   | 253   | 272   | Trim65  |         |
| Trim66  | 397   | 349   | 184    | 681   | 553   | 504   | 465   | 658   | 489   | 887   | 635   | 173   | 307   | 235   | 373   | 367   | 346   | 450   | 484   | 506   | 536   | 197   | 658   | 1041  | 166   | 586   | 184   | 155   | Trim66  |         |
| Trim67  | 2568  | 3620  | 3544   | 6548  | 9959  | 7079  | 7755  | 5674  | 5745  | 7923  | 6361  | 4869  | 4765  | 4756  | 3463  | 2816  | 5711  | 7553  | 8455  | 5881  | 8671  | 10196 | 5148  | 5741  | 8626  | 3139  | 3932  | 4130  | Trim67  |         |
| Trim68  | 904   | 739   | 703    | 591   | 623   | 599   | 558   | 935   | 1006  | 944   | 1086  | 863   | 1134  | 788   | 802   | 842   | 608   | 616   | 495   | 584   | 505   | 884   | 983   | 829   | 730   | 895   | 915   | 782   | Trim68  |         |
| Trim69  | 16    | 18    | 23     | 20    | 7     | 28    | 23    | 10    | 7     | 7     | 13    | 1     | 8     | 2     | 12    | 33    | 38    | 23    | 9     | 20    | 17    | 5     | 3     | 7     | 7     | 9     | 1     | 6     | Trim69  |         |
| Trim7   | 120   | 86    | 65     | 79    | 140   | 160   | 132   | 35    | 61    | 53    | 95    | 59    | 79    | 49    | 116   | 86    | 95    | 81    | 141   | 98    | 117   | 47    | 68    | 48    | 94    | 40    | 62    | 39    | Trim7   |         |
| Trim71  | 442   | 481   | 871    | 546   | 331   | 267   | 203   | 206   | 146   | 149   | 165   | 260   | 354   | 217   | 426   | 564   | 616   | 299   | 277   | 220   | 181   | 157   | 107   | 155   | 131   | 343   | 310   | 352   | Trim71  |         |
| Trim72  | 102   | 179   | 298    | 459   | 322   | 283   | 284   | 40    | 91    | 93    | 718   | 99    | 98    | 93    | 128   | 150   | 380   | 479   | 395   | 157   | 279   | 134   | 366   | 78    | 100   | 77    | 98    | 69    | Trim72  |         |
| Trim75  | 13    | 3     | 15     | 2     | 2     | 1     | 3     | 5     | 1     | 0     | 4     | 0     | 0     | 1     | 8     | 4     | 2     | 4     | 2     | 8     | 3     | 0     | 0     | 0     | 3     | 2     | 0     | 0     | Trim75  |         |
| Trim8   | 1465  | 1900  | 2687   | 2372  | 2703  | 2081  | 1969  | 3101  | 3255  | 4097  | 3868  | 4432  | 3776  | 4224  | 1515  | 1583  | 2771  | 2168  | 2781  | 1850  | 2141  | 4243  | 3355  | 4555  | 4771  | 4968  | 4154  | 4187  | Trim8   |         |
| Trim80  | 3     | 3     | 1      | 2     | 7     | 1     | 2     | 1     | 2     | 2     | 0     | 2     | 7     | 7     | 4     | 1     | 1     | 1     | 1     | 4     | 8     | 10    | 2     | 7     | 2     | 14    | 6     | 15    | Trim80  |         |
| Trim9   | 3350  | 3867  | 4294   | 5258  | 7334  | 6262  | 6174  | 3998  | 3647  | 4347  | 3787  | 3589  | 3563  | 3604  | 4240  | 3590  | 4573  | 5843  | 6511  | 6397  | 7378  | 5342  | 3902  | 3601  | 4893  | 2004  | 3516  | 3432  | Trim9   |         |
| Triml1  | 0     | 0     | 0      | 0     | 0     | 0     | 0     | 0     | 1     | 0     | 2     | 0     | 0     | 0     | 0     | 0     | 0     | 0     | 0     | 0     | 0     | 0     | 0     | 0     | 0     | 0     | 0     | 0     | Triml1  |         |
| Triml2  | 0     | 0     | 0      | 0     | 0     | 0     | 0     | 0     | 2     | 0     | 0     | 0     | 0     | 0     | 0     | 1     | 0     | 2     | 0     | 0     | 0     | 3     | 0     | 0     | 0     | 0     | 0     | 1     | Triml2  |         |
| Trio    | 10439 | 11431 | 8256   | 13232 | 16994 | 14960 | 15414 | 14169 | 16993 | 18780 | 19840 | 16931 | 15748 | 15826 | 10086 | 11174 | 10706 | 14127 | 15112 | 12908 | 16241 | 16798 | 15905 | 14931 | 19741 | 10174 | 15659 | 14406 | Trio    |         |
| Triobp  | 5192  | 6918  | 7181   | 7860  | 7180  | 6488  | 5653  | 3262  | 4524  | 5145  | 4491  | 5125  | 4534  | 4346  | 4833  | 6071  | 7496  | 7690  | 7974  | 5573  | 6075  | 5183  | 4043  | 5295  | 5303  | 4527  | 4458  | 4112  | Triobp  |         |
| Triop10 | 2587  | 3239  | 3782   | 3529  | 3015  | 3101  | 2750  | 1054  | 1163  | 1148  | 1300  | 1364  | 1312  | 1277  | 2403  | 2823  | 3651  | 3354  | 3175  | 2726  | 2895  | 1009  | 1206  | 1353  | 1110  | 1499  | 1312  | 1406  | Triop10 |         |
| Triop11 | 4021  | 3073  | 2907   | 3687  | 4237  | 4490  | 4416  | 5107  | 5072  | 5219  | 6119  | 5171  | 5296  | 5514  | 3821  | 3596  | 3140  | 3695  | 3599  | 3913  | 4285  | 5005  | 5259  | 4467  | 5533  | 3678  | 5163  | 4761  | Triop11 |         |
| Triop12 | 36440 | 31399 | 26488  | 30108 | 31767 | 35600 | 35121 | 39718 | 35461 | 33782 | 34632 | 39059 | 38081 | 37875 | 36224 | 32387 | 27438 | 28595 | 30939 | 33974 | 34067 | 35087 | 34582 | 30714 | 34974 | 27245 | 41576 | 36914 | Triop12 |         |
| Triop13 | 1827  | 1562  | 2030   | 1273  | 1088  | 1111  | 1381  | 1638  | 1720  | 1440  | 1645  | 2583  | 2195  | 2651  | 1602  | 1759  | 1657  | 1228  | 1223  | 1176  | 1180  | 1374  | 1618  | 2015  | 1677  | 3121  | 2382  | 2861  | Triop13 |         |
| Triop4  | 4692  | 4042  | 3932   | 4456  | 4597  | 4584  | 5022  | 4671  | 4324  | 4100  | 4520  | 4256  | 4447  | 4360  | 5250  | 4395  | 4204  | 4639  | 4392  | 4730  | 4706  | 4508  | 4675  | 4033  | 4087  | 4230  | 4353  | 4347  | Triop4  |         |
| Triop6  | 2786  | 3083  | 3321   | 3063  | 2473  | 2692  | 2297  | 2500  | 3111  | 2805  | 3107  | 2917  | 2834  | 2570  | 2367  | 2931  | 3498  | 3047  | 2872  | 2641  | 2271  | 2216  | 3207  | 3058  | 2527  | 3752  | 2914  | 2756  | Triop6  |         |
| Triqk   | 802   | 590   | 638    | 855   | 794   | 833   | 914   | 843   | 783   | 737   | 657   | 583   | 611   | 611   | 944   | 721   | 797   | 798   | 774   | 935   | 911   | 857   | 901   | 588   | 689   | 544   | 648   | 649   | Triqk   |         |
| Triir   | 4380  | 4997  | 4816   | 4837  | 4414  | 3757  | 5139  | 4244  | 3749  | 4667  | 4224  | 4598  | 4190  | 5668  | 4278  | 3477  | 5106  | 4512  | 4736  | 4221  | 4924  | 3706  | 3660  | 5161  | 4691  | 5500  | 4795  | 5366  | Triir   |         |
| Trit1   | 1718  | 1812  | 1552   | 1985  | 1709  | 1802  | 2016  | 2114  | 1847  | 1966  | 1777  | 2084  | 1944  | 2105  | 1817  | 1572  | 1663  | 1782  | 1824  | 1749  | 1876  | 1997  | 1934  | 1879  | 2092  | 1964  | 2141  | 2083  | Trit1   |         |
| Trmo    | 140   | 117   | 188    | 131   | 161   | 124   | 153   | 361   | 335   | 354   | 284   | 339   | 328   | 365   | 136   | 93    | 153   | 147   | 118   | 168   | 147   | 302   | 394   | 355   | 375   | 501   | 366   | 395   | Trmo    |         |
| Trmt1   | 4668  | 5240  | 5095   | 6341  | 5830  | 5544  | 5342  | 3486  | 3658  | 3958  | 3979  | 4023  | 3743  | 3877  | 4656  | 4914  | 5778  | 5685  | 6238  | 4932  | 5603  | 3780  | 3646  | 3809  | 3761  | 4070  | 3944  | 3946  | Trmt1   |         |
| Trmt10a | 878   | 667   | 781    | 620   | 560   | 620   | 629   | 1305  | 1217  | 1136  | 1124  | 1540  | 1450  | 1377  | 1574  | 803   | 700   | 709   | 583   | 607   | 700   | 567   | 1211  | 1265  | 1348  | 1120  | 1684  | 1558  | 1634    | Trmt10a |
| Trmt10b | 1301  | 1215  | 1141   | 1324  | 1097  | 1051  | 1198  | 1132  | 988   | 893   | 1015  | 972   | 1007  | 901   | 1291  | 1266  | 1291  | 1177  | 1004  | 1257  | 1256  | 1081  | 965   | 934   | 1095  | 990   | 896   | 922   | Trmt10b |         |
| Trmt10c | 2008  | 1795  | 1823   | 1682  | 1279  | 1548  | 1750  | 2312  | 1879  | 1529  | 1575  | 1689  | 1665  | 1744  | 2004  | 1965  | 1575  | 1591  | 1362  | 1859  | 1591  | 1601  | 1797  | 1696  | 1728  | 1904  | 1845  | 1818  | Trmt10c |         |
| Trmt11  | 1141  | 789   | 872    | 901   | 790   | 927   | 962   | 1055  | 941   | 787   | 841   | 1094  | 979   | 1037  | 1110  | 1048  | 823   | 843   | 864   | 1037  | 826   | 907   | 857   | 988   | 928   | 1272  | 1061  | 1168  | Trmt11  |         |
| Trmt112 | 1498  | 1903  | 2157   | 1867  | 1620  | 1576  | 1578  | 1534  | 2215  | 2136  | 2331  | 2353  | 2581  | 2574  | 1352  | 1479  | 1909  | 1657  | 1827  | 1723  | 1560  | 1576  | 1952  | 2573  | 2217  | 3001  | 2613  | 2744  | Trmt112 |         |
| Trmt12  | 1400  | 1437  | 1197   | 1306  | 1252  | 1214  | 1287  | 905   | 953   | 848   | 809   | 1026  | 1027  | 992   | 1472  | 1379  | 1167  | 1251  | 1159  | 1402  | 1239  | 934   | 908   | 838   | 889   | 918   | 1141  | 1003  | Trmt12  |         |
| Trmt13  | 1897  | 1570  | 1413   | 1695  | 1624  | 1862  | 1866  | 1937  | 1804  | 1762  | 1916  | 1921  | 1810  | 2009  | 1983  | 1826  | 1423  | 1648  | 1497  | 1882  | 1754  | 1793  | 1843  | 1687  | 1847  | 1570  | 1929  | 1810  | Trmt13  |         |
| Trmt1l  | 2451  | 2725  | 3132</ |       |       |       |       |       |       |       |       |       |       |       |       |       |       |       |       |       |       |       |       |       |       |       |       |       |         |         |



|         |       |       |       |       |       |       |       |       |       |       |       |       |       |       |       |       |       |       |       |       |       |       |       |       |       |       |       |         |         |
|---------|-------|-------|-------|-------|-------|-------|-------|-------|-------|-------|-------|-------|-------|-------|-------|-------|-------|-------|-------|-------|-------|-------|-------|-------|-------|-------|-------|---------|---------|
| Trpc4   | 314   | 273   | 325   | 300   | 358   | 386   | 355   | 401   | 485   | 380   | 338   | 219   | 206   | 266   | 286   | 277   | 318   | 270   | 398   | 400   | 377   | 470   | 300   | 324   | 433   | 175   | 263   | 203     | Trpc4   |
| Trpc4ap | 11259 | 12295 | 11230 | 11938 | 11757 | 11644 | 11599 | 10810 | 11402 | 10899 | 10707 | 11339 | 11058 | 11309 | 10789 | 11459 | 11503 | 11739 | 12022 | 10791 | 12170 | 11608 | 11563 | 10783 | 11806 | 10874 | 10712 | 10993   | Trpc4ap |
| Trpc5   | 65    | 65    | 24    | 76    | 158   | 131   | 121   | 165   | 218   | 131   | 218   | 68    | 144   | 103   | 99    | 64    | 45    | 80    | 82    | 157   | 142   | 177   | 215   | 67    | 147   | 5     | 74    | 89      | Trpc5   |
| Trpc5os | 24    | 8     | 27    | 24    | 19    | 31    | 48    | 1     | 4     | 5     | 1     | 1     | 5     | 4     | 13    | 21    | 17    | 18    | 19    | 19    | 21    | 0     | 3     | 5     | 2     | 14    | 3     | 4       | Trpc5os |
| Trpc6   | 63    | 38    | 65    | 10    | 57    | 57    | 30    | 85    | 57    | 43    | 66    | 73    | 95    | 76    | 41    | 65    | 51    | 21    | 39    | 70    | 24    | 45    | 78    | 87    | 63    | 123   | 108   | 89      | Trpc6   |
| Trpc7   | 39    | 49    | 13    | 80    | 145   | 97    | 136   | 120   | 129   | 151   | 116   | 78    | 58    | 84    | 54    | 23    | 70    | 109   | 149   | 130   | 109   | 197   | 104   | 116   | 194   | 75    | 63    | 65      | Trpc7   |
| Trpm1   | 103   | 16    | 16    | 5     | 20    | 17    | 9     | 46    | 75    | 62    | 68    | 63    | 45    | 57    | 24    | 9     | 23    | 21    | 19    | 9     | 50    | 76    | 61    | 47    | 74    | 44    | 49    | Trpm1   |         |
| Trpm2   | 129   | 148   | 82    | 188   | 398   | 269   | 275   | 177   | 264   | 280   | 239   | 163   | 243   | 188   | 173   | 188   | 192   | 325   | 294   | 235   | 290   | 251   | 223   | 203   | 346   | 79    | 156   | 116     | Trpm2   |
| Trpm3   | 1517  | 1474  | 939   | 1479  | 2931  | 2631  | 2192  | 4036  | 4397  | 3993  | 3904  | 3804  | 4196  | 2740  | 1940  | 2087  | 1048  | 1801  | 1941  | 3028  | 2717  | 4314  | 7035  | 2736  | 3549  | 2011  | 2664  | 2718    | Trpm3   |
| Trpm4   | 2036  | 2428  | 2595  | 2977  | 2369  | 2298  | 2271  | 929   | 1373  | 1191  | 1593  | 3664  | 1344  | 930   | 1998  | 2433  | 2525  | 2972  | 2491  | 1911  | 2228  | 1123  | 1435  | 1167  | 1075  | 1034  | 1046  | 974     | Trpm4   |
| Trpm5   | 54    | 51    | 30    | 79    | 106   | 112   | 53    | 289   | 597   | 416   | 1152  | 177   | 236   | 131   | 63    | 69    | 61    | 108   | 65    | 86    | 68    | 508   | 1045  | 344   | 325   | 157   | 142   | 112     | Trpm5   |
| Trpm6   | 135   | 108   | 105   | 79    | 57    | 89    | 85    | 89    | 93    | 94    | 97    | 108   | 115   | 92    | 115   | 116   | 81    | 53    | 54    | 93    | 63    | 82    | 111   | 65    | 87    | 56    | 87    | 94      | Trpm6   |
| Trpm7   | 15169 | 10263 | 8777  | 10083 | 10488 | 12866 | 12553 | 13133 | 12353 | 10295 | 11772 | 11457 | 11397 | 11797 | 14249 | 12833 | 9434  | 10230 | 10357 | 12270 | 12173 | 10910 | 11863 | 10119 | 10749 | 8984  | 12270 | 10993   | Trpm7   |
| Trpm8   | 0     | 1     | 1     | 1     | 2     | 6     | 10    | 4     | 9     | 8     | 7     | 5     | 10    | 4     | 9     | 2     | 8     | 0     | 7     | 10    | 4     | 7     | 6     | 5     | 9     | 3     | 7     | 5       | Trpm8   |
| Trps1   | 3678  | 2179  | 2518  | 2282  | 2192  | 2431  | 2372  | 6582  | 6286  | 4313  | 4556  | 3301  | 3512  | 3389  | 2763  | 2473  | 2231  | 2024  | 2293  | 2658  | 2237  | 3212  | 6455  | 3729  | 2977  | 3652  | 3741  | 3712    | Trps1   |
| Trpt1   | 453   | 537   | 534   | 547   | 502   | 522   | 540   | 399   | 419   | 440   | 454   | 436   | 449   | 421   | 471   | 458   | 526   | 548   | 570   | 506   | 526   | 391   | 428   | 490   | 471   | 513   | 427   | 425     | Trpt1   |
| Trpv1   | 9     | 10    | 0     | 24    | 71    | 6     | 15    | 33    | 86    | 53    | 147   | 4     | 19    | 0     | 18    | 9     | 9     | 46    | 7     | 7     | 5     | 122   | 44    | 2     | 61    | 1     | 2     | 4       | Trpv1   |
| Trpv2   | 288   | 315   | 306   | 261   | 479   | 386   | 311   | 689   | 718   | 693   | 670   | 503   | 708   | 502   | 319   | 323   | 255   | 297   | 391   | 345   | 317   | 891   | 733   | 648   | 727   | 488   | 621   | 465     | Trpv2   |
| Trpv3   | 8     | 6     | 5     | 0     | 11    | 2     | 6     | 18    | 35    | 32    | 42    | 17    | 28    | 9     | 9     | 9     | 1     | 1     | 5     | 2     | 2     | 30    | 46    | 29    | 24    | 9     | 23    | 9       | Trpv3   |
| Trpv4   | 216   | 156   | 166   | 170   | 142   | 168   | 94    | 121   | 257   | 315   | 421   | 61    | 81    | 47    | 154   | 206   | 156   | 164   | 140   | 151   | 144   | 234   | 230   | 245   | 109   | 134   | 43    | 62      | Trpv4   |
| Trpv5   | 0     | 3     | 0     | 3     | 2     | 0     | 4     | 7     | 5     | 0     | 3     | 0     | 6     | 2     | 0     | 0     | 0     | 3     | 4     | 0     | 2     | 3     | 6     | 1     | 3     | 7     | 2     | 2       | Trpv5   |
| Trpv6   | 3     | 10    | 2     | 8     | 2     | 2     | 0     | 21    | 21    | 8     | 35    | 4     | 18    | 2     | 9     | 1     | 0     | 4     | 2     | 0     | 1     | 7     | 16    | 6     | 6     | 14    | 2     | 0       | Trpv6   |
| Trrap   | 12824 | 14537 | 10823 | 14549 | 16257 | 16796 | 14937 | 16618 | 19997 | 22132 | 21136 | 24539 | 23157 | 22264 | 11954 | 14164 | 12758 | 14922 | 16377 | 13427 | 16292 | 18939 | 18272 | 17539 | 23384 | 13580 | 23835 | 20595   | Trrap   |
| Trub1   | 2220  | 1988  | 1918  | 2064  | 1955  | 2108  | 2101  | 1993  | 2086  | 2192  | 2348  | 2202  | 2294  | 2201  | 2027  | 2088  | 2118  | 2092  | 1859  | 2010  | 2061  | 2134  | 2137  | 2260  | 2036  | 2003  | 2020  | 2169    | Trub1   |
| Trub2   | 2718  | 2566  | 1852  | 2157  | 2488  | 2531  | 2347  | 3053  | 3282  | 2915  | 2944  | 3799  | 3759  | 3336  | 2589  | 2375  | 2016  | 2182  | 2472  | 2641  | 2422  | 2650  | 3006  | 2897  | 3499  | 3205  | 3934  | 3640    | Trub2   |
| Try5    | 1     | 2     | 0     | 0     | 3     | 12    | 1     | 4     | 2     | 0     | 0     | 11    | 10    | 1     | 2     | 0     | 3     | 1     | 1     | 6     | 0     | 2     | 3     | 5     | 7     | 0     | 4     | 4       | Try5    |
| Tsacc   | 55    | 46    | 63    | 43    | 44    | 37    | 45    | 99    | 77    | 89    | 83    | 92    | 75    | 82    | 50    | 29    | 42    | 36    | 51    | 55    | 61    | 85    | 77    | 96    | 71    | 63    | 78    | 85      | Tsacc   |
| Tsc1    | 8945  | 9792  | 7719  | 9120  | 10301 | 10005 | 10017 | 9180  | 8725  | 8965  | 8595  | 8845  | 8444  | 9041  | 9126  | 8528  | 8553  | 9458  | 10111 | 9562  | 10705 | 9463  | 8054  | 8329  | 10127 | 5740  | 8937  | 8395    | Tsc1    |
| Tsc2    | 11532 | 14024 | 12648 | 14799 | 13484 | 12985 | 13037 | 8200  | 10180 | 11236 | 10645 | 12079 | 10720 | 11050 | 10722 | 13785 | 14002 | 15033 | 14643 | 10413 | 13887 | 11448 | 9482  | 11205 | 11615 | 9285  | 10268 | 10619   | Tsc2    |
| Tsc22d1 | 22231 | 22984 | 24814 | 24968 | 27956 | 23570 | 25781 | 35457 | 34199 | 36981 | 36160 | 36229 | 35249 | 36050 | 23488 | 22792 | 25515 | 25431 | 26707 | 25150 | 26026 | 41271 | 34575 | 37194 | 37466 | 36759 | 34070 | 37193   | Tsc22d1 |
| Tsc22d2 | 6518  | 5910  | 7378  | 9876  | 7972  | 8624  | 9313  | 5523  | 4412  | 4747  | 5147  | 5238  | 5559  | 5619  | 7152  | 7048  | 7883  | 10045 | 7925  | 6943  | 8956  | 6497  | 4622  | 5389  | 5750  | 5025  | 5138  | 5372    | Tsc22d2 |
| Tsc22d3 | 1794  | 2141  | 2540  | 1891  | 2073  | 1768  | 1532  | 3038  | 2722  | 3055  | 2873  | 3010  | 3161  | 2912  | 2022  | 2221  | 2265  | 1775  | 1889  | 2091  | 1687  | 2812  | 2848  | 2975  | 2824  | 3089  | 3233  | 3273    | Tsc22d3 |
| Tsc22d4 | 1982  | 2550  | 2807  | 2678  | 2518  | 2426  | 1880  | 1668  | 2059  | 2103  | 2548  | 2044  | 2002  | 1976  | 1865  | 2414  | 2529  | 2809  | 2557  | 1772  | 2255  | 1942  | 2277  | 2569  | 2023  | 2651  | 1816  | 1765    | Tsc22d4 |
| Tsen15  | 1353  | 1117  | 1021  | 1050  | 825   | 934   | 988   | 1290  | 1345  | 1120  | 1329  | 1303  | 1169  | 1378  | 1254  | 1309  | 1029  | 995   | 919   | 942   | 1028  | 1110  | 1364  | 1355  | 1069  | 1519  | 1203  | 1351    | Tsen15  |
| Tsen2   | 809   | 941   | 779   | 854   | 915   | 972   | 980   | 1301  | 1441  | 1444  | 1335  | 1304  | 1234  | 1400  | 793   | 794   | 810   | 913   | 983   | 897   | 1029  | 1198  | 1398  | 1454  | 1353  | 1313  | 1384  | 1390    | Tsen2   |
| Tsen34  | 6284  | 7159  | 6699  | 6470  | 6151  | 5829  | 5302  | 4598  | 4961  | 4757  | 4415  | 4638  | 4351  | 4280  | 5813  | 6196  | 6953  | 6478  | 6917  | 5882  | 5722  | 4132  | 5170  | 5046  | 4757  | 5583  | 4912  | 4423    | Tsen34  |
| Tsen54  | 1789  | 2352  | 2063  | 2200  | 1701  | 1724  | 1694  | 1098  | 1098  | 1106  | 1038  | 1086  | 1181  | 1077  | 1817  | 2043  | 2136  | 1944  | 1876  | 1831  | 1796  | 1116  | 1117  | 1191  | 1135  | 1321  | 1227  | 1102    | Tsen54  |
| Tsfm    | 1788  | 1830  | 2139  | 1865  | 1516  | 1608  | 1672  | 1070  | 1120  | 1143  | 1169  | 1426  | 1484  | 1597  | 1725  | 1667  | 2023  | 1782  | 1723  | 1540  | 1505  | 1191  | 1082  | 1498  | 1276  | 1716  | 1497  | 1683    | Tsfm    |
| Tsg10f  | 7987  | 7118  | 6765  | 7339  | 7823  | 7557  | 8914  | 10898 | 8753  | 9144  | 8229  | 9571  | 8537  | 10586 | 8780  | 6646  | 7345  | 7668  | 7983  | 8254  | 8658  | 9910  | 8804  | 9599  | 9896  | 10011 | 9836  | 10370   | Tsg10f  |
| Tsga10  | 1772  | 1750  | 1879  | 2108  | 2024  | 2091  | 2145  | 3718  | 2798  | 2867  | 2696  | 2791  | 2840  | 2972  | 2243  | 1914  | 1902  | 1913  | 1981  | 2586  | 2028  | 3319  | 2972  | 2627  | 3240  | 2186  | 2967  | 2860    | Tsga10  |
| Tsga10p | 3     | 3     | 2     | 6     | 2     | 0     | 6     | 4     | 2     | 2     | 0     | 16    | 1     | 3     | 5     | 1     | 0     | 0     | 0     | 0     | 3     | 9     | 7     | 9     | 3     | 1     | 2     | Tsga10p |         |
| Tsga13  | 27    | 31    | 18    | 50    | 27    | 30    | 47    | 22    | 17    | 38    | 28    | 14    | 31    | 20    | 32    | 19    | 41    | 42    | 47    | 23    | 41    | 53    | 23    | 18    | 46    | 39    | 17    | 19      | Tsga13  |
| Tshb    | 0     | 0     | 0     | 4     | 7     | 3     | 1     | 2     | 9     | 0     | 2     | 2     | 7     | 4     | 0     | 2     | 0     | 0     | 0     | 3     | 0     | 18    | 9     | 0     | 0     | 0     | 0     | 0       | Tshb    |
| Tshr    | 158   | 161   | 74    | 222   | 244   | 194   | 304   | 76    | 121   | 80    | 92    | 89    | 48    | 97    | 140   | 67    | 122   | 193   | 245   | 247   | 235   | 43    | 39    | 112   | 102   | 80    | 57    | 65      | Tshr    |
| Tshz1   | 3599  | 3296  | 3985  | 4971  | 6073  | 4563  | 4693  | 3657  | 4107  | 5879  | 6484  | 4625  | 4124  | 4359  | 3440  | 3401  | 4757  | 4655  | 5195  | 4084  | 4836  | 4478  | 5155  | 5080  | 4376  | 5540  | 3750  | 4195    | Tshz1   |
| Tshz2   | 1491  | 1663  | 1434  | 2342  | 4336  | 2282  | 2282  | 2862  | 3631  | 4419  | 5148  | 2111  | 2456  | 2323  | 1921  | 1610  | 1995  | 2535  | 2536  | 2295  | 2433  | 4009  | 4499  | 3001  | 3217  | 2224  | 1988  | 1893    | Tshz2   |
| Tshz3   | 1433  | 1461  | 1860  | 2174  | 2738  | 2127  | 2044  | 1281  | 1529  | 1942  | 2041  | 1157  | 1613  | 1269  | 1667  | 1466  | 1926  | 2051  | 2346  | 1890  | 2137  | 1790  | 1619  | 1262  | 1372  | 1160  | 1029  | 1191    | Tshz3   |
| Tsks    | 2     | 8     | 5     | 12    | 0     | 13    | 8     | 6     | 2     | 0     | 7     | 3     | 2     | 2     | 1     | 8     | 9     | 1     | 15    | 13    | 4     | 3     | 6     | 7     | 4     | 3     | 10    | 1       | Tsks    |
| Tsku    | 1270  | 1496  | 1293  | 1123  | 1035  | 1066  | 851   | 990   | 1380  | 1235  | 1484  | 1055  | 1118  | 1066  | 1192  | 1463  | 1183  | 1109  | 966   | 1072  | 867   | 1074  | 1626  | 1273  | 1123  | 1353  | 1031  | 1108    | Tsku    |
| Tslp    | 50    | 22    | 31    | 28    | 27    | 23    | 25    | 15    | 21    | 21    | 56    | 10    | 14    | 2     | 6     | 30    | 37    | 24    | 33    | 9     | 27    | 37    | 36    | 22    | 29    | 16    | 16    | 14      | Tslp    |
| Tsn     |       |       |       |       |       |       |       |       |       |       |       |       |       |       |       |       |       |       |       |       |       |       |       |       |       |       |       |         |         |

|         |       |       |       |       |       |       |       |       |       |       |       |       |       |       |       |       |       |       |       |       |       |       |       |       |       |       |       |       |         |       |
|---------|-------|-------|-------|-------|-------|-------|-------|-------|-------|-------|-------|-------|-------|-------|-------|-------|-------|-------|-------|-------|-------|-------|-------|-------|-------|-------|-------|-------|---------|-------|
| Tspyl3  | 597   | 460   | 474   | 630   | 907   | 906   | 716   | 1196  | 1402  | 1449  | 1353  | 924   | 942   | 964   | 510   | 491   | 498   | 632   | 786   | 673   | 736   | 1624  | 1449  | 1170  | 1370  | 1034  | 865   | 888   | Tspyl3  |       |
| Tspyl4  | 13024 | 15088 | 11068 | 16111 | 18411 | 15917 | 17914 | 14044 | 12122 | 12303 | 10812 | 9779  | 9559  | 10120 | 15725 | 12544 | 14147 | 16956 | 16971 | 19024 | 18449 | 15264 | 12189 | 10458 | 13133 | 7967  | 9473  | 9664  | Tspyl4  |       |
| Tspyl5  | 1523  | 1500  | 1501  | 1921  | 2392  | 2172  | 2227  | 1613  | 1506  | 1608  | 1453  | 1249  | 1170  | 1253  | 1888  | 1399  | 1615  | 1873  | 2205  | 2100  | 2282  | 1955  | 1621  | 1393  | 1720  | 1133  | 1198  | 1188  | Tspyl5  |       |
| Tsr1    | 5406  | 4971  | 4906  | 4484  | 4183  | 4173  | 4748  | 5155  | 4552  | 4161  | 4535  | 5133  | 4766  | 5321  | 5414  | 4759  | 4317  | 4220  | 4256  | 4827  | 4524  | 3880  | 4568  | 4712  | 4349  | 5323  | 5163  | 5285  | Tsr1    |       |
| Tsr2    | 2759  | 2566  | 2557  | 2566  | 2234  | 2513  | 2638  | 2696  | 2455  | 2464  | 2361  | 2476  | 2499  | 2795  | 2718  | 2282  | 2428  | 2619  | 2386  | 2726  | 2455  | 2369  | 2359  | 2527  | 2507  | 2720  | 2629  | 2796  | Tsr2    |       |
| Tsr3    | 1631  | 1987  | 2020  | 1855  | 1634  | 1624  | 1701  | 1674  | 1679  | 1717  | 1767  | 1909  | 2031  | 2043  | 1611  | 1682  | 1938  | 1783  | 1769  | 1851  | 1692  | 1594  | 1587  | 2004  | 1830  | 2381  | 2188  | 1952  | Tsr3    |       |
| Tssc4   | 2046  | 2632  | 2436  | 2394  | 2110  | 2196  | 1893  | 2140  | 2512  | 2455  | 2170  | 2682  | 2392  | 2624  | 1917  | 2164  | 2425  | 2099  | 2512  | 2178  | 2078  | 1965  | 2302  | 2672  | 2475  | 3228  | 2723  | 2655  | Tssc4   |       |
| Tssk1   | 5     | 13    | 6     | 4     | 9     | 13    | 9     | 10    | 12    | 14    | 8     | 10    | 9     | 13    | 11    | 8     | 15    | 18    | 9     | 7     | 13    | 8     | 13    | 9     | 10    | 5     | 15    | 8     | Tssk1   |       |
| Tssk2   | 0     | 2     | 1     | 0     | 1     | 0     | 0     | 2     | 0     | 0     | 0     | 0     | 0     | 0     | 4     | 2     | 0     | 0     | 4     | 0     | 0     | 0     | 1     | 0     | 0     | 3     | 1     | 0     | Tssk2   |       |
| Tssk3   | 2     | 1     | 2     | 12    | 11    | 4     | 3     | 0     | 2     | 1     | 2     | 4     | 1     | 0     | 3     | 2     | 2     | 2     | 2     | 4     | 4     | 2     | 3     | 1     | 5     | 0     | 1     | 0     | Tssk3   |       |
| Tssk4   | 232   | 183   | 191   | 157   | 186   | 190   | 158   | 127   | 148   | 141   | 200   | 128   | 124   | 144   | 171   | 206   | 197   | 157   | 136   | 165   | 159   | 84    | 131   | 135   | 111   | 136   | 117   | 139   | Tssk4   |       |
| Tssk5   | 1     | 0     | 0     | 0     | 0     | 0     | 0     | 0     | 0     | 0     | 0     | 0     | 0     | 0     | 0     | 0     | 0     | 0     | 0     | 0     | 0     | 0     | 1     | 0     | 0     | 0     | 0     | 0     | Tssk5   |       |
| Tssk6   | 12    | 15    | 15    | 18    | 11    | 8     | 3     | 13    | 7     | 7     | 9     | 13    | 10    | 12    | 8     | 12    | 25    | 8     | 8     | 6     | 13    | 5     | 11    | 7     | 15    | 11    | 23    | 8     | Tssk6   |       |
| Tst     | 469   | 600   | 464   | 499   | 473   | 448   | 420   | 299   | 411   | 471   | 321   | 298   | 306   | 287   | 409   | 602   | 510   | 484   | 553   | 525   | 461   | 236   | 491   | 365   | 352   | 388   | 275   | 280   | Tst     |       |
| Tstd1   | 145   | 180   | 272   | 212   | 209   | 165   | 235   | 173   | 160   | 228   | 189   | 215   | 179   | 249   | 141   | 132   | 314   | 198   | 279   | 189   | 216   | 180   | 168   | 279   | 187   | 270   | 229   | 295   | Tstd1   |       |
| Tstd2   | 4380  | 4730  | 4605  | 4283  | 3856  | 4074  | 4060  | 4523  | 4397  | 4116  | 4424  | 4804  | 4758  | 4987  | 4207  | 4377  | 4335  | 4012  | 4118  | 4151  | 4106  | 4131  | 4380  | 4428  | 4499  | 4984  | 5003  | 5165  | Tstd2   |       |
| Tstd3   | 824   | 690   | 1004  | 861   | 1043  | 903   | 963   | 993   | 802   | 923   | 838   | 1147  | 1084  | 1324  | 1092  | 826   | 985   | 813   | 953   | 1030  | 974   | 993   | 893   | 914   | 986   | 1048  | 1158  | 1311  | Tstd3   |       |
| Tsx     | 58    | 55    | 39    | 124   | 59    | 70    | 83    | 35    | 22    | 24    | 43    | 38    | 42    | 44    | 55    | 58    | 82    | 123   | 78    | 88    | 105   | 38    | 20    | 27    | 60    | 37    | 13    | 38    | Tsx     |       |
| Ttbk1   | 4297  | 6488  | 7362  | 9628  | 9517  | 7647  | 7238  | 4001  | 4374  | 5998  | 4818  | 5816  | 4152  | 5471  | 4444  | 4363  | 9153  | 9292  | 9563  | 6515  | 8453  | 6518  | 3563  | 6130  | 7232  | 4810  | 4936  | 4742  | Ttbk1   |       |
| Ttbk2   | 12768 | 10436 | 9471  | 13116 | 14933 | 15819 | 17154 | 9572  | 7700  | 8301  | 7983  | 7856  | 7731  | 8386  | 13351 | 11316 | 11167 | 14048 | 13695 | 14781 | 17377 | 9302  | 7476  | 6972  | 9716  | 5712  | 7842  | 7713  | Ttbk2   |       |
| Ttc1    | 4072  | 4129  | 4213  | 3992  | 3557  | 3753  | 3881  | 3284  | 3021  | 2827  | 2781  | 3017  | 3048  | 3104  | 4453  | 4171  | 4055  | 3873  | 3582  | 4198  | 3792  | 2704  | 3019  | 3087  | 3077  | 3196  | 3126  | 3318  | Ttc1    |       |
| Ttc12   | 664   | 734   | 642   | 554   | 525   | 568   | 453   | 391   | 340   | 325   | 332   | 374   | 459   | 322   | 761   | 746   | 599   | 538   | 503   | 519   | 529   | 391   | 447   | 239   | 309   | 355   | 408   | 426   | Ttc12   |       |
| Ttc13   | 5569  | 5916  | 5277  | 5585  | 5740  | 5851  | 5903  | 4528  | 4538  | 4678  | 4447  | 4727  | 4701  | 4557  | 5545  | 5673  | 5102  | 5798  | 5559  | 5667  | 6114  | 4777  | 4208  | 4359  | 5210  | 4365  | 4750  | 4727  | Ttc13   |       |
| Ttc14   | 16679 | 11863 | 9743  | 12709 | 12930 | 16090 | 16288 | 17363 | 14672 | 12080 | 13851 | 12917 | 13292 | 14081 | 17453 | 14871 | 10596 | 12544 | 11652 | 17915 | 16234 | 12552 | 14197 | 11016 | 12690 | 8937  | 13415 | 12504 | Ttc14   |       |
| Ttc16   | 142   | 172   | 141   | 266   | 187   | 141   | 156   | 77    | 90    | 61    | 76    | 111   | 111   | 85    | 129   | 175   | 158   | 240   | 233   | 140   | 189   | 114   | 95    | 73    | 73    | 57    | 93    | 78    | Ttc16   |       |
| Ttc17   | 2148  | 2110  | 1865  | 2188  | 2549  | 2331  | 2566  | 2945  | 3249  | 3900  | 2994  | 2777  | 2791  | 2911  | 2041  | 2077  | 2046  | 2328  | 2395  | 2127  | 2467  | 3290  | 3020  | 2845  | 3135  | 2105  | 2626  | 2676  | Ttc17   |       |
| Ttc19   | 3106  | 2611  | 2004  | 2296  | 2636  | 2776  | 2934  | 2507  | 2389  | 1907  | 2169  | 1574  | 1837  | 1959  | 3025  | 2843  | 2277  | 2359  | 2456  | 3193  | 3054  | 2356  | 2346  | 1664  | 1962  | 1542  | 1683  | 1661  | Ttc19   |       |
| Ttc21a  | 185   | 233   | 102   | 200   | 255   | 172   | 149   | 223   | 297   | 306   | 236   | 253   | 314   | 182   | 186   | 274   | 141   | 168   | 178   | 223   | 174   | 246   | 410   | 232   | 195   | 147   | 210   | 191   | Ttc21a  |       |
| Ttc21b  | 5677  | 5663  | 4638  | 4472  | 4284  | 4437  | 4802  | 2920  | 2688  | 2357  | 2495  | 2325  | 2516  | 2696  | 5835  | 5416  | 4828  | 4635  | 4217  | 4981  | 4698  | 2301  | 2682  | 2264  | 2382  | 2325  | 2673  | 2582  | Ttc21b  |       |
| Ttc22   | 0     | 10    | 10    | 7     | 20    | 17    | 6     | 33    | 66    | 81    | 62    | 23    | 75    | 43    | 7     | 6     | 20    | 14    | 24    | 10    | 11    | 69    | 61    | 53    | 60    | 42    | 56    | 37    | Ttc22   |       |
| Ttc23   | 2441  | 2246  | 2261  | 1735  | 1487  | 1691  | 1721  | 1904  | 2065  | 1701  | 2018  | 2079  | 2244  | 2087  | 2247  | 2323  | 1949  | 1822  | 1709  | 2060  | 1712  | 1293  | 2166  | 1915  | 1629  | 2133  | 2337  | 2438  | Ttc23   |       |
| Ttc24   | 6     | 4     | 0     | 5     | 2     | 1     | 1     | 4     | 2     | 5     | 2     | 1     | 7     | 7     | 3     | 6     | 1     | 2     | 2     | 7     | 3     | 3     | 3     | 4     | 6     | 0     | 5     | 0     | Ttc24   |       |
| Ttc24a  | 25    | 3     | 1     | 7     | 7     | 0     | 0     | 38    | 32    | 49    | 28    | 0     | 6     | 2     | 3     | 6     | 1     | 6     | 0     | 0     | 0     | 10    | 39    | 78    | 0     | 76    | 0     | 0     | Ttc24a  |       |
| Ttc26   | 3127  | 2611  | 2872  | 2496  | 2372  | 2545  | 2699  | 2049  | 1827  | 1588  | 1595  | 1829  | 1664  | 2035  | 3120  | 2896  | 2661  | 2322  | 2500  | 2934  | 2633  | 1649  | 1759  | 1764  | 1645  | 1811  | 1922  | 1975  | Ttc26   |       |
| Ttc27   | 1929  | 1715  | 1587  | 1325  | 1263  | 1302  | 1339  | 1976  | 1853  | 1612  | 1482  | 1673  | 1670  | 1749  | 1808  | 1732  | 1411  | 1339  | 1276  | 1413  | 1230  | 1472  | 1816  | 1668  | 1616  | 1875  | 1872  | 1969  | Ttc27   |       |
| Ttc28   | 6786  | 8813  | 8617  | 13457 | 16598 | 14011 | 12334 | 8929  | 12236 | 14964 | 13101 | 13533 | 11463 | 11882 | 7249  | 8231  | 11391 | 15141 | 15875 | 11184 | 14503 | 14634 | 10830 | 15299 | 16306 | 8165  | 10323 | 10281 | Ttc28   |       |
| Ttc29   | 18    | 32    | 22    | 12    | 29    | 27    | 19    | 35    | 32    | 22    | 19    | 31    | 49    | 16    | 20    | 46    | 52    | 36    | 51    | 39    | 21    | 32    | 54    | 23    | 31    | 18    | 31    | 30    | Ttc29   |       |
| Ttc30   | 54689 | 54795 | 36535 | 50511 | 63290 | 62868 | 66001 | 95979 | 82100 | 72759 | 67133 | 68460 | 65314 | 71582 | 64570 | 50659 | 45833 | 53820 | 57859 | 78466 | 65817 | 78408 | 80452 | 62846 | 80503 | 43541 | 69841 | 64743 | Ttc30   |       |
| Ttc30a1 | 1360  | 1114  | 1176  | 1092  | 1046  | 1136  | 1199  | 1196  | 1135  | 910   | 1071  | 1094  | 1102  | 998   | 1313  | 1234  | 1088  | 990   | 1120  | 1275  | 1086  | 1044  | 1138  | 1035  | 927   | 1191  | 1109  | 1176  | Ttc30a1 |       |
| Ttc30a2 | 118   | 116   | 111   | 110   | 112   | 129   | 134   | 64    | 71    | 106   | 51    | 55    | 79    | 63    | 140   | 114   | 144   | 194   | 124   | 135   | 150   | 80    | 67    | 74    | 65    | 57    | 71    | 63    | Ttc30a2 |       |
| Ttc30b  | 851   | 796   | 760   | 699   | 909   | 801   | 826   | 1034  | 1035  | 855   | 844   | 791   | 927   | 1036  | 787   | 839   | 725   | 934   | 966   | 878   | 999   | 1196  | 780   | 699   | 794   | 734   | 775   | 775   | Ttc30b  |       |
| Ttc32   | 119   | 106   | 110   | 110   | 126   | 120   | 112   | 519   | 391   | 435   | 457   | 472   | 427   | 450   | 600   | 137   | 146   | 129   | 89    | 127   | 126   | 135   | 341   | 364   | 409   | 404   | 482   | 433   | 558     | Ttc32 |
| Ttc33   | 1945  | 1632  | 1944  | 1953  | 1891  | 1746  | 1985  | 2700  | 2255  | 2123  | 2189  | 2111  | 2119  | 2366  | 2080  | 1932  | 1873  | 1976  | 1926  | 2473  | 1986  | 2288  | 2259  | 2180  | 2237  | 2356  | 2285  | 2279  | Ttc33   |       |
| Ttc34   | 12    | 10    | 1     | 11    | 9     | 9     | 2     | 10    | 36    | 21    | 29    | 36    | 22    | 12    | 7     | 1     | 0     | 2     | 4     | 4     | 25    | 45    | 21    | 21    | 22    | 14    | 17    | 17    | Ttc34   |       |
| Ttc36   | 9     | 12    | 22    | 12    | 18    | 21    | 20    | 4     | 12    | 16    | 26    | 9     | 10    | 16    | 8     | 11    | 19    | 14    | 22    | 22    | 23    | 15    | 6     | 20    | 15    | 10    | 14    | 9     | Ttc36   |       |
| Ttc37   | 6772  | 5859  | 4365  | 5329  | 5119  | 5777  | 5945  | 4716  | 4374  | 3535  | 3991  | 3545  | 3485  | 3764  | 6878  | 6201  | 4852  | 5290  | 4787  | 6530  | 5806  | 3335  | 4203  | 3192  | 3559  | 2632  | 3796  | 3500  | Ttc37   |       |
| Ttc38   | 594   | 511   | 556   | 481   | 453   | 446   | 380   | 546   | 615   | 608   | 686   | 484   | 591   | 442   | 553   | 604   | 452   | 518   | 401   | 456   | 399   | 429   | 760   | 605   | 546   | 580   | 465   | 436   | Ttc38   |       |
| Ttc39a  | 111   | 76    | 72    | 33    | 49    | 56    | 50    | 99    | 115   | 93    | 152   | 106   | 119   | 100   | 86    | 83    | 58    | 45    | 51    | 46    | 38    | 65    | 102   | 68    | 74    | 136   | 117   | 126   | Ttc39a  |       |
| Ttc39b  | 2403  | 1752  | 1117  | 1951  | 2325  | 2593  | 2691  | 1846  | 1840  | 1786  | 1480  | 1218  | 1194  | 1208  | 2182  | 2009  | 1447  | 1841  | 2092  | 2787  | 2581  | 1140  | 1489  | 1674  | 1861  | 1074  | 992   | 910   | Ttc39b  |       |
| Ttc39c  | 798   | 670   | 743   | 710   | 1042  | 915   | 863   | 1207  | 1161  | 11    |       |       |       |       |       |       |       |       |       |       |       |       |       |       |       |       |       |       |         |       |

|         |        |        |        |        |        |        |        |        |        |        |        |        |        |        |        |        |        |        |        |        |        |        |        |        |        |        |        |        |         |         |
|---------|--------|--------|--------|--------|--------|--------|--------|--------|--------|--------|--------|--------|--------|--------|--------|--------|--------|--------|--------|--------|--------|--------|--------|--------|--------|--------|--------|--------|---------|---------|
| Ttl9    | 78     | 129    | 66     | 137    | 125    | 109    | 103    | 90     | 119    | 107    | 131    | 101    | 100    | 104    | 92     | 87     | 83     | 103    | 113    | 122    | 114    | 189    | 151    | 84     | 142    | 65     | 130    | 81     | Ttl9    |         |
| Ttn     | 619    | 86     | 7      | 15     | 74     | 70     | 45     | 773    | 2439   | 202    | 10163  | 83     | 297    | 28     | 255    | 651    | 20     | 70     | 23     | 56     | 37     | 944    | 8189   | 143    | 184    | 21     | 58     | 36     | Ttn     |         |
| Ttpa    | 221    | 84     | 175    | 77     | 160    | 103    | 104    | 277    | 246    | 306    | 246    | 143    | 257    | 155    | 177    | 174    | 109    | 84     | 85     | 89     | 76     | 137    | 294    | 217    | 109    | 270    | 160    | 203    | Ttpa    |         |
| Ttpal   | 4881   | 4786   | 4271   | 4372   | 4555   | 4864   | 4785   | 6289   | 6075   | 5786   | 5835   | 5973   | 5856   | 5920   | 5077   | 4487   | 4473   | 4544   | 4651   | 4459   | 4542   | 6542   | 6236   | 5574   | 6009   | 5515   | 5930   | 6039   | Ttpal   |         |
| Ttr     | 5076   | 10001  | 2011   | 5476   | 20728  | 11607  | 10573  | 11347  | 17663  | 16184  | 13706  | 14307  | 18608  | 5307   | 7034   | 10824  | 4190   | 7670   | 10749  | 12192  | 12129  | 19798  | 33175  | 8540   | 11136  | 5402   | 4597   | 4703   | Ttr     |         |
| Tthy1   | 6030   | 7423   | 8102   | 9487   | 11671  | 9907   | 10723  | 11717  | 11158  | 13308  | 10817  | 15275  | 14247  | 15399  | 7304   | 5440   | 9265   | 9263   | 10834  | 8629   | 9857   | 12330  | 9848   | 13573  | 14763  | 13857  | 12029  | 14150  | Tthy1   |         |
| Tthy2   | 2479   | 2553   | 2504   | 2458   | 2822   | 2538   | 2397   | 1265   | 1530   | 1714   | 2089   | 1231   | 1545   | 1310   | 2302   | 2766   | 2313   | 2640   | 2569   | 2244   | 2540   | 1601   | 1658   | 1575   | 1745   | 1214   | 1110   | 1123   | Tthy2   |         |
| Tthy3   | 18108  | 24303  | 26342  | 28892  | 28752  | 25391  | 21703  | 19069  | 25131  | 29941  | 26359  | 32092  | 26215  | 25039  | 16868  | 21059  | 29300  | 29453  | 31170  | 20886  | 23526  | 27681  | 22938  | 33151  | 31960  | 34678  | 24279  | 25352  | Tthy3   |         |
| Tub     | 8051   | 8919   | 7842   | 12838  | 16952  | 14110  | 15744  | 11775  | 11632  | 13025  | 11234  | 11565  | 9169   | 11400  | 9308   | 7418   | 12019  | 13699  | 15543  | 12040  | 15311  | 17400  | 9576   | 11473  | 14734  | 8190   | 9511   | 9425   | Tub     |         |
| Tuba1a  | 138636 | 175043 | 113694 | 165612 | 180260 | 171545 | 169767 | 205367 | 171297 | 160708 | 133298 | 152004 | 143758 | 158019 | 178902 | 136361 | 147625 | 158223 | 184215 | 198775 | 192157 | 196277 | 170693 | 158132 | 182387 | 135362 | 158916 | 165171 | Tuba1a  |         |
| Tuba1b  | 31668  | 37204  | 33352  | 26604  | 22812  | 26520  | 24082  | 31372  | 32862  | 27265  | 29516  | 39111  | 37054  | 37874  | 29218  | 27694  | 30080  | 24555  | 28499  | 27544  | 25344  | 21383  | 32059  | 36471  | 32406  | 48168  | 43742  | 42515  | Tuba1b  |         |
| Tuba1c  | 7650   | 8279   | 6271   | 5587   | 4286   | 5071   | 5178   | 5381   | 5338   | 4391   | 3872   | 5538   | 5146   | 4854   | 6883   | 7223   | 6084   | 5036   | 5882   | 6082   | 4941   | 3902   | 5229   | 5257   | 4528   | 7382   | 5882   | 6025   | Tuba1c  |         |
| Tuba3a  | 0      | 2      | 0      | 1      | 0      | 1      | 1      | 2      | 2      | 2      | 5      | 4      | 0      | 3      | 0      | 3      | 0      | 0      | 0      | 0      | 3      | 3      | 4      | 1      | 0      | 2      | 0      | 1      | Tuba3a  |         |
| Tuba3b  | 0      | 0      | 0      | 0      | 0      | 0      | 0      | 0      | 0      | 0      | 0      | 0      | 0      | 0      | 0      | 2      | 0      | 0      | 0      | 0      | 0      | 0      | 0      | 0      | 0      | 0      | 0      | 0      | Tuba3b  |         |
| Tuba4a  | 1495   | 1627   | 1042   | 1245   | 1123   | 1161   | 1195   | 415    | 590    | 414    | 631    | 330    | 457    | 294    | 1416   | 1584   | 1079   | 1294   | 1305   | 1467   | 1201   | 276    | 645    | 538    | 422    | 563    | 329    | 317    | Tuba4a  |         |
| Tuba8   | 17     | 10     | 7      | 27     | 25     | 22     | 15     | 11     | 10     | 3      | 8      | 7      | 22     | 7      | 15     | 17     | 22     | 7      | 21     | 15     | 7      | 16     | 7      | 6      | 11     | 8      | 15     | 15     | Tuba8   |         |
| Tubal3  | 3      | 4      | 0      | 3      | 2      | 2      | 2      | 0      | 3      | 5      | 0      | 2      | 1      | 1      | 4      | 9      | 0      | 4      | 1      | 7      | 0      | 1      | 5      | 6      | 0      | 2      | 1      | 1      | Tubal3  |         |
| Tubb1   | 120    | 72     | 158    | 47     | 38     | 57     | 30     | 100    | 102    | 80     | 79     | 112    | 228    | 78     | 70     | 115    | 63     | 33     | 33     | 79     | 45     | 99     | 91     | 73     | 68     | 228    | 200    | 103    | Tubb1   |         |
| Tubb2a  | 12345  | 20460  | 15270  | 21009  | 24414  | 21438  | 20122  | 18208  | 19421  | 19581  | 16525  | 12601  | 14855  | 13952  | 16833  | 14866  | 19432  | 20145  | 21618  | 25870  | 23299  | 20102  | 19465  | 15224  | 19508  | 9758   | 13038  | 11860  | Tubb2a  |         |
| Tubb2b  | 96963  | 141312 | 122420 | 166635 | 169604 | 161414 | 152713 | 138745 | 131886 | 154973 | 121155 | 149095 | 126090 | 147967 | 124213 | 96680  | 151941 | 157887 | 183103 | 17742  | 185750 | 139738 | 131308 | 161613 | 176659 | 130647 | 151091 | 146591 | Tubb2b  |         |
| Tubb3   | 33400  | 53165  | 38774  | 53867  | 63964  | 58011  | 51447  | 64489  | 64189  | 69177  | 51843  | 67436  | 62732  | 62487  | 44213  | 36572  | 52026  | 52735  | 65307  | 59358  | 58243  | 73915  | 61624  | 66575  | 76982  | 59286  | 66494  | 62246  | Tubb3   |         |
| Tubb4a  | 5828   | 7756   | 6337   | 8462   | 11188  | 9505   | 8275   | 8636   | 8802   | 10310  | 8404   | 9866   | 9586   | 8788   | 7090   | 5889   | 8041   | 8823   | 10557  | 9355   | 9397   | 12614  | 7693   | 9180   | 10604  | 7330   | 8894   | 8936   | Tubb4a  |         |
| Tubb4b  | 19962  | 24310  | 21072  | 18175  | 14735  | 16248  | 15370  | 13198  | 14937  | 12877  | 12922  | 17798  | 17608  | 16154  | 18742  | 19077  | 19513  | 16096  | 17861  | 17356  | 15638  | 11428  | 14498  | 15334  | 14015  | 21276  | 18899  | 18443  | Tubb4b  |         |
| Tubb5   | 123531 | 149183 | 116698 | 123750 | 130217 | 130057 | 128633 | 145026 | 155956 | 152264 | 129141 | 171101 | 156548 | 165143 | 126630 | 114617 | 128310 | 121595 | 144232 | 134527 | 136548 | 150124 | 142408 | 160201 | 164825 | 183756 | 168137 | 174109 | Tubb5   |         |
| Tubb6   | 2352   | 2664   | 2000   | 1502   | 1049   | 1588   | 981    | 1172   | 1576   | 1066   | 2673   | 1441   | 1765   | 1316   | 2275   | 2751   | 2268   | 1498   | 1163   | 1368   | 1019   | 1120   | 2554   | 1215   | 1064   | 1428   | 1940   | 1536   | Tubb6   |         |
| Tubd1   | 569    | 537    | 483    | 541    | 431    | 471    | 478    | 603    | 577    | 594    | 565    | 648    | 576    | 598    | 601    | 534    | 567    | 503    | 518    | 586    | 516    | 565    | 638    | 646    | 573    | 669    | 638    | 610    | Tubd1   |         |
| Tube1   | 2010   | 1614   | 1418   | 1385   | 1288   | 1539   | 1642   | 1515   | 1402   | 1180   | 1364   | 1382   | 1591   | 1452   | 1862   | 1860   | 1347   | 1325   | 1332   | 1819   | 1597   | 1096   | 1276   | 1243   | 1341   | 1438   | 1712   | 1578   | Tube1   |         |
| Tubg1   | 3091   | 4163   | 4267   | 3951   | 3355   | 3433   | 3270   | 2006   | 2565   | 2842   | 2564   | 3646   | 2739   | 3159   | 2931   | 3566   | 4336   | 3624   | 3915   | 3074   | 3165   | 2578   | 2676   | 3200   | 3032   | 4048   | 3172   | 3297   | Tubg1   |         |
| Tubg2   | 203    | 233    | 203    | 346    | 506    | 418    | 339    | 431    | 496    | 559    | 501    | 381    | 353    | 335    | 227    | 206    | 265    | 336    | 411    | 349    | 453    | 675    | 503    | 462    | 584    | 384    | 277    | 280    | Tubg2   |         |
| Tubgcp2 | 6236   | 6572   | 4722   | 5698   | 5866   | 6267   | 6184   | 5542   | 6155   | 5405   | 5463   | 6415   | 5831   | 5818   | 6035   | 6048   | 5049   | 5428   | 5687   | 6278   | 5979   | 4996   | 5536   | 5357   | 6096   | 6425   | 6270   | 5814   | Tubgcp2 |         |
| Tubgcp3 | 4735   | 5309   | 4111   | 3952   | 4160   | 4267   | 4571   | 5794   | 5682   | 4777   | 4580   | 5734   | 5095   | 5664   | 6049   | 4203   | 4288   | 4058   | 4535   | 5126   | 4538   | 4893   | 4993   | 5307   | 5115   | 5316   | 5530   | 5710   | 5745    | Tubgcp3 |
| Tubgcp4 | 8043   | 7650   | 6205   | 6337   | 6275   | 6710   | 7016   | 6829   | 5825   | 5128   | 5253   | 5907   | 5821   | 5977   | 7934   | 7503   | 6401   | 6292   | 6304   | 7569   | 7138   | 5212   | 5797   | 5441   | 5472   | 5077   | 6229   | 5973   | Tubgcp4 |         |
| Tubgcp5 | 3596   | 3007   | 2651   | 2828   | 3328   | 3568   | 3869   | 4975   | 4494   | 3677   | 3867   | 4124   | 3999   | 4353   | 3864   | 3000   | 2898   | 2791   | 3140   | 3932   | 3514   | 4007   | 4361   | 3662   | 3826   | 3604   | 4279   | 4199   | Tubgcp5 |         |
| Tubgcp6 | 8390   | 10222  | 7612   | 10317  | 8656   | 8914   | 8827   | 4517   | 5006   | 5559   | 5093   | 6036   | 5562   | 5613   | 7875   | 9138   | 8989   | 10433  | 9488   | 7924   | 9546   | 4986   | 4782   | 5478   | 5819   | 4120   | 5820   | 5811   | Tubgcp6 |         |
| Tufm    | 7238   | 9001   | 8744   | 7511   | 6359   | 6588   | 6461   | 4730   | 5438   | 5540   | 5308   | 5618   | 5587   | 5643   | 6560   | 7154   | 8530   | 6923   | 7377   | 6608   | 6627   | 4527   | 5091   | 5728   | 5380   | 6917   | 5901   | 6065   | Tufm    |         |
| Tuft1   | 1380   | 1408   | 1434   | 1303   | 1189   | 1146   | 1063   | 272    | 384    | 306    | 243    | 253    | 383    | 255    | 1321   | 1441   | 1287   | 1310   | 1116   | 1143   | 1216   | 266    | 410    | 267    | 200    | 334    | 270    | 389    | Tuft1   |         |
| Tufl    | 13437  | 11035  | 13992  | 12579  | 13104  | 15073  | 16659  | 14997  | 15786  | 16479  | 15741  | 15111  | 16577  | 13510  | 12150  | 14069  | 12866  | 13358  | 11704  | 14033  | 18182  | 14961  | 15976  | 15830  | 17939  | 15873  | 16665  | 16665  | Tufl    |         |
| Tulp1   | 166    | 190    | 201    | 246    | 150    | 228    | 154    | 144    | 149    | 193    | 167    | 175    | 202    | 154    | 140    | 187    | 190    | 160    | 203    | 123    | 151    | 109    | 180    | 203    | 109    | 226    | 217    | 211    | Tulp1   |         |
| Tulp2   | 10     | 9      | 0      | 3      | 4      | 3      | 6      | 10     | 25     | 19     | 30     | 2      | 8      | 2      | 5      | 12     | 1      | 2      | 6      | 1      | 4      | 7      | 19     | 10     | 7      | 8      | 5      | 6      | Tulp2   |         |
| Tulp3   | 4896   | 4980   | 5564   | 5344   | 3914   | 4508   | 3901   | 2713   | 3277   | 3194   | 3543   | 3263   | 3337   | 2903   | 4330   | 5505   | 5246   | 5191   | 4287   | 3418   | 4051   | 3160   | 3251   | 3351   | 2961   | 3597   | 2933   | 3176   | Tulp3   |         |
| Tulp4   | 13451  | 12705  | 10747  | 17252  | 21585  | 21453  | 21246  | 20584  | 20185  | 22136  | 21843  | 20845  | 21144  | 21749  | 14467  | 13664  | 13424  | 17765  | 18873  | 17579  | 21565  | 22082  | 18429  | 17947  | 27247  | 13805  | 21088  | 19066  | Tulp4   |         |
| Tunar   | 205    | 257    | 188    | 455    | 923    | 599    | 507    | 572    | 553    | 794    | 567    | 368    | 431    | 365    | 253    | 262    | 392    | 555    | 598    | 592    | 608    | 944    | 553    | 525    | 791    | 269    | 265    | 287    | Tunar   |         |
| Tusc1   | 118    | 105    | 118    | 150    | 192    | 130    | 162    | 341    | 356    | 390    | 394    | 336    | 314    | 400    | 141    | 93     | 143    | 167    | 152    | 128    | 171    | 386    | 350    | 346    | 353    | 331    | 330    | 405    | Tusc1   |         |
| Tusc2   | 3959   | 4758   | 3512   | 3706   | 3128   | 3321   | 3742   | 2252   | 2209   | 2269   | 2097   | 2367   | 2243   | 2599   | 4131   | 3705   | 3872   | 3575   | 3338   | 3597   | 3595   | 2358   | 2190   | 2229   | 2354   | 2506   | 2321   | 2676   | Tusc2   |         |
| Tut1    | 2476   | 2824   | 3020   | 2981   | 2612   | 2593   | 2556   | 1976   | 2280   | 2298   | 2416   | 2728   | 2573   | 2632   | 2404   | 2602   | 3001   | 2604   | 2791   | 2533   | 2610   | 2154   | 2086   | 2602   | 2553   | 3190   | 2611   | 2645   | Tut1    |         |
| Tut4    | 13493  | 10367  | 9679   | 10584  | 10716  | 12512  | 12139  | 15259  | 14452  | 13325  | 14631  | 16025  | 15415  | 16237  | 12171  | 11702  | 10199  | 10366  | 10869  | 11405  | 12029  | 13954  | 13713  | 12507  | 13985  | 11984  | 16646  | 15659  | Tut4    |         |
| Tut7    | 10665  | 10215  | 7869   | 9375   | 8888   | 9655   | 10166  | 9000   | 8394   | 7838   | 804    |        |        |        |        |        |        |        |        |        |        |        |        |        |        |        |        |        |         |         |

|         |       |       |       |       |       |       |       |       |       |       |       |       |       |       |       |       |       |       |       |       |       |       |       |       |       |       |       |       |         |       |
|---------|-------|-------|-------|-------|-------|-------|-------|-------|-------|-------|-------|-------|-------|-------|-------|-------|-------|-------|-------|-------|-------|-------|-------|-------|-------|-------|-------|-------|---------|-------|
| Tyms    | 4376  | 3829  | 3975  | 2913  | 2304  | 2888  | 3419  | 4093  | 4044  | 3336  | 3309  | 4501  | 3781  | 4742  | 3835  | 3711  | 3657  | 2666  | 3023  | 3554  | 3080  | 2513  | 3579  | 4232  | 3372  | 5679  | 4694  | 5180  | Tyms    |       |
| Tyr     | 30    | 7     | 2     | 0     | 0     | 12    | 3     | 35    | 63    | 44    | 48    | 33    | 31    | 11    | 16    | 5     | 0     | 25    | 5     | 6     | 0     | 20    | 55    | 33    | 14    | 11    | 10    | 6     | Tyr     |       |
| Tyro3   | 4080  | 4522  | 4748  | 3900  | 4151  | 4061  | 3635  | 3670  | 4164  | 3706  | 3645  | 4299  | 4139  | 3840  | 3877  | 4122  | 4672  | 3765  | 4701  | 3692  | 3774  | 3354  | 3972  | 4301  | 3578  | 4555  | 4177  | 4118  | Tyro3   |       |
| Tyrobp  | 172   | 251   | 220   | 195   | 182   | 156   | 142   | 206   | 288   | 249   | 288   | 216   | 214   | 189   | 146   | 222   | 182   | 227   | 151   | 206   | 152   | 217   | 389   | 226   | 255   | 211   | 258   | 190   | Tyrobp  |       |
| Tyrp1   | 13    | 4     | 7     | 1     | 16    | 12    | 16    | 15    | 40    | 17    | 24    | 7     | 5     | 13    | 3     | 3     | 9     | 17    | 6     | 7     | 13    | 23    | 22    | 13    | 23    | 9     | 17    | Tyrp1 |         |       |
| Tysnd1  | 2031  | 2496  | 2131  | 2128  | 1697  | 1688  | 1534  | 1180  | 1322  | 1264  | 1284  | 1342  | 1326  | 1257  | 1795  | 2133  | 2195  | 2129  | 1938  | 1592  | 1614  | 1315  | 1328  | 1405  | 1434  | 1576  | 1263  | 1285  | Tysnd1  |       |
| Tyw1    | 2480  | 2935  | 2618  | 2489  | 2264  | 2169  | 2199  | 1926  | 1919  | 1835  | 1828  | 2052  | 2012  | 1907  | 2306  | 2518  | 2431  | 2382  | 2427  | 2256  | 2242  | 1634  | 1987  | 1858  | 1801  | 2074  | 2201  | 2028  | Tyw1    |       |
| Tyw3    | 693   | 575   | 636   | 604   | 661   | 678   | 663   | 1160  | 1070  | 1259  | 1082  | 1218  | 1077  | 1230  | 545   | 507   | 510   | 511   | 781   | 620   | 593   | 986   | 1083  | 1199  | 1060  | 1240  | 1189  | 1239  | Tyw3    |       |
| Tyw5    | 433   | 327   | 509   | 389   | 428   | 435   | 515   | 976   | 922   | 792   | 908   | 973   | 896   | 976   | 516   | 390   | 454   | 316   | 503   | 496   | 408   | 952   | 986   | 882   | 808   | 943   | 951   | 983   | Tyw5    |       |
| U2af1   | 7556  | 8300  | 8293  | 7358  | 6473  | 6843  | 7254  | 8328  | 8174  | 7762  | 8078  | 9632  | 8963  | 9932  | 7370  | 7097  | 7934  | 7074  | 7356  | 8086  | 7227  | 6863  | 7890  | 8810  | 8533  | 10425 | 10187 | 10385 | U2af1   |       |
| U2af14  | 1     | 4     | 0     | 5     | 0     | 0     | 1     | 0     | 1     | 10    | 2     | 9     | 0     | 4     | 0     | 0     | 0     | 4     | 3     | 3     | 4     | 3     | 3     | 9     | 0     | 2     | 0     | 4     | U2af14  |       |
| U2af2   | 13551 | 16363 | 17571 | 16374 | 14755 | 14670 | 14580 | 17077 | 19439 | 21375 | 19360 | 24560 | 21825 | 24609 | 12678 | 12238 | 17198 | 14317 | 16937 | 14044 | 15408 | 17398 | 17583 | 23920 | 21994 | 28736 | 23538 | 25590 | U2af2   |       |
| U2surp  | 20013 | 15460 | 16284 | 15622 | 14883 | 16427 | 18026 | 19643 | 17178 | 15522 | 15840 | 17558 | 16960 | 18446 | 20356 | 16395 | 16131 | 15084 | 15173 | 19290 | 16687 | 15567 | 16209 | 16069 | 16370 | 15557 | 18836 | 17575 | U2surp  |       |
| Uaca    | 6412  | 7005  | 9161  | 6449  | 5345  | 5711  | 4976  | 4007  | 4700  | 5310  | 5625  | 5712  | 6238  | 5617  | 6505  | 7745  | 7384  | 6058  | 5331  | 5081  | 4962  | 4482  | 5471  | 5374  | 5053  | 5995  | 6452  | 5779  | Uaca    |       |
| Uap1    | 5105  | 4844  | 4421  | 4309  | 3895  | 3922  | 4562  | 3197  | 3005  | 2830  | 2861  | 2797  | 2772  | 2855  | 4971  | 4974  | 4463  | 4475  | 3888  | 4631  | 4195  | 3056  | 3001  | 2883  | 2739  | 2862  | 2767  | 2859  | Uap1    |       |
| Uap11   | 354   | 395   | 344   | 339   | 275   | 321   | 193   | 181   | 252   | 169   | 229   | 139   | 194   | 115   | 331   | 429   | 358   | 343   | 282   | 317   | 203   | 152   | 353   | 217   | 180   | 195   | 167   | 132   | Uap11   |       |
| Uba1    | 51401 | 59553 | 48415 | 55265 | 54933 | 57685 | 52404 | 52595 | 55132 | 57181 | 50656 | 58689 | 55281 | 54818 | 51444 | 46128 | 52223 | 52755 | 61886 | 52137 | 58157 | 57685 | 51572 | 55209 | 60767 | 55839 | 59080 | 57512 | Uba1    |       |
| Uba1y   | 6     | 10    | 4     | 3     | 22    | 10    | 13    | 10    | 16    | 5     | 9     | 15    | 20    | 9     | 0     | 0     | 0     | 0     | 0     | 0     | 0     | 0     | 0     | 0     | 0     | 0     | 0     | 0     | Uba1y   |       |
| Uba2    | 17704 | 16136 | 14923 | 14539 | 13120 | 13514 | 15922 | 15370 | 13428 | 12595 | 11741 | 14933 | 13150 | 15490 | 17682 | 14920 | 14237 | 13753 | 13794 | 15439 | 14908 | 12770 | 13685 | 13612 | 13529 | 16249 | 14518 | 16465 | Uba2    |       |
| Uba3    | 7732  | 5645  | 6721  | 6640  | 6322  | 6380  | 7293  | 11235 | 9167  | 8899  | 8714  | 9647  | 9256  | 10299 | 7945  | 6833  | 6407  | 6399  | 6547  | 7893  | 6814  | 9361  | 9593  | 9393  | 10379 | 9624  | 10154 | Uba3  |         |       |
| Uba5    | 5915  | 5752  | 5224  | 5607  | 5188  | 5325  | 5804  | 6705  | 6126  | 5627  | 6295  | 5839  | 5772  | 5894  | 5916  | 6380  | 5234  | 5548  | 4902  | 5596  | 5432  | 6027  | 6295  | 5867  | 6042  | 5148  | 5827  | 5781  | Uba5    |       |
| Uba52   | 225   | 260   | 303   | 322   | 192   | 170   | 207   | 170   | 157   | 240   | 211   | 276   | 208   | 226   | 142   | 164   | 341   | 252   | 255   | 193   | 202   | 139   | 156   | 340   | 221   | 310   | 244   | 329   | Uba52   |       |
| Uba6    | 12927 | 10318 | 8616  | 9272  | 7681  | 9412  | 9647  | 7592  | 6446  | 5067  | 5513  | 6070  | 6120  | 6323  | 12939 | 12291 | 8719  | 8912  | 7741  | 10477 | 9012  | 5765  | 6449  | 5059  | 5619  | 4615  | 6564  | 6355  | Uba6    |       |
| Uba7    | 120   | 154   | 131   | 46    | 52    | 58    | 64    | 68    | 105   | 161   | 164   | 149   | 193   | 138   | 148   | 187   | 102   | 50    | 45    | 88    | 59    | 99    | 168   | 85    | 93    | 137   | 157   | 284   | Uba7    |       |
| Uba1c   | 3460  | 3710  | 2771  | 3058  | 3105  | 3262  | 3260  | 2943  | 3175  | 2668  | 2832  | 2721  | 2724  | 2687  | 3492  | 3383  | 3155  | 3051  | 3141  | 3183  | 3159  | 2891  | 2951  | 2744  | 2840  | 2902  | 2421  | 2903  | Uba1c   |       |
| Uba2c   | 2756  | 2804  | 2768  | 2506  | 2273  | 2246  | 2214  | 1944  | 2089  | 1881  | 1965  | 2362  | 2245  | 2142  | 2552  | 2593  | 2773  | 2272  | 2508  | 2465  | 2297  | 1851  | 2227  | 2225  | 2095  | 2699  | 2291  | 2375  | Uba2c   |       |
| Ubald1  | 1446  | 1885  | 1275  | 1853  | 1840  | 1832  | 1654  | 1485  | 1845  | 1968  | 1890  | 1641  | 1657  | 1602  | 1383  | 1555  | 1618  | 1930  | 1860  | 1677  | 1782  | 1968  | 1790  | 1831  | 1729  | 1599  | 1438  | 1450  | Ubald1  |       |
| Ubald2  | 1416  | 1963  | 1665  | 1795  | 1799  | 1668  | 1360  | 2286  | 2478  | 2673  | 2269  | 2627  | 2485  | 2204  | 1435  | 1287  | 1875  | 1878  | 2202  | 1948  | 1574  | 2174  | 2234  | 2866  | 2835  | 2970  | 2816  | 2302  | Ubald2  |       |
| Uba1p   | 4207  | 4644  | 4923  | 4247  | 4019  | 4012  | 4155  | 3858  | 3504  | 3920  | 3277  | 4058  | 3884  | 4142  | 4183  | 4048  | 4727  | 3903  | 4575  | 4103  | 4114  | 3176  | 3705  | 3370  | 3801  | 3828  | 4656  | 4326  | 4489    | Uba1p |
| Uba1l   | 174   | 215   | 167   | 395   | 493   | 326   | 306   | 204   | 197   | 190   | 200   | 112   | 201   | 117   | 199   | 250   | 239   | 383   | 425   | 311   | 336   | 317   | 173   | 153   | 211   | 83    | 156   | 97    | Uba1l   |       |
| Uba2p   | 8989  | 11143 | 12902 | 12375 | 10667 | 9976  | 9724  | 7376  | 9007  | 10681 | 9823  | 11203 | 9475  | 10275 | 8801  | 10511 | 12462 | 12175 | 11543 | 8184  | 10702 | 9640  | 8121  | 11342 | 10233 | 11877 | 9538  | 10098 | Uba2p   |       |
| Uba2l   | 17334 | 17229 | 16967 | 17249 | 16499 | 17095 | 16841 | 16825 | 17915 | 18225 | 18298 | 20240 | 19469 | 19559 | 16481 | 16400 | 17021 | 16421 | 17482 | 15330 | 17314 | 18229 | 17506 | 19030 | 18724 | 20209 | 19805 | 20093 | Uba2l   |       |
| Ubash3a | 6     | 2     | 4     | 0     | 5     | 0     | 1     | 6     | 5     | 12    | 7     | 1     | 10    | 5     | 1     | 12    | 5     | 0     | 0     | 3     | 0     | 7     | 8     | 6     | 0     | 8     | 1     | 11    | Ubash3a |       |
| Ubash3b | 2392  | 2203  | 2121  | 2315  | 3521  | 2580  | 2768  | 2353  | 2328  | 2210  | 2369  | 1564  | 1998  | 1444  | 2714  | 2314  | 2343  | 2872  | 2627  | 2348  | 2819  | 3103  | 1904  | 1580  | 2343  | 1569  | 1565  | 1513  | Ubash3b |       |
| Ubb     | 47843 | 59456 | 48976 | 51292 | 53560 | 52318 | 55297 | 54461 | 60158 | 51798 | 55294 | 57933 | 57200 | 61911 | 50225 | 49763 | 53438 | 51352 | 58811 | 56242 | 56772 | 54094 | 60582 | 61167 | 60859 | 66682 | 64896 | 60163 | Ubb     |       |
| Ubc     | 6888  | 7431  | 9086  | 8708  | 8264  | 7724  | 8085  | 8006  | 9756  | 11616 | 13140 | 13058 | 11853 | 12704 | 6948  | 8090  | 9489  | 9554  | 10305 | 5930  | 8243  | 11655 | 10139 | 13008 | 12588 | 14685 | 12794 | 11843 | Ubc     |       |
| Ubd     | 0     | 0     | 0     | 0     | 0     | 0     | 0     | 0     | 0     | 0     | 0     | 0     | 0     | 0     | 0     | 0     | 0     | 0     | 0     | 0     | 0     | 0     | 0     | 0     | 0     | 0     | 0     | 1     | Ubd     |       |
| Ube2a   | 3290  | 2985  | 3155  | 3316  | 3032  | 3011  | 3511  | 2442  | 2164  | 2179  | 2120  | 2338  | 2171  | 2551  | 3522  | 3089  | 3182  | 3122  | 2890  | 3128  | 3329  | 2371  | 2311  | 2285  | 2204  | 2461  | 2083  | 2500  | Ube2a   |       |
| Ube2b   | 13279 | 10974 | 10970 | 11310 | 12002 | 12019 | 14707 | 11870 | 9716  | 9442  | 9907  | 9650  | 9719  | 10615 | 14372 | 12522 | 11768 | 12616 | 12357 | 14760 | 13783 | 10457 | 9935  | 10457 | 10155 | 9906  | 9642  | 10377 | Ube2b   |       |
| Ube2c   | 3378  | 3961  | 4586  | 3369  | 2295  | 2631  | 3006  | 3698  | 4180  | 4121  | 3990  | 6599  | 5332  | 7026  | 3032  | 3132  | 4079  | 2496  | 3323  | 2944  | 2898  | 2864  | 3717  | 5909  | 4760  | 8839  | 6701  | 7245  | Ube2c   |       |
| Ube2cbp | 90    | 109   | 113   | 75    | 122   | 65    | 106   | 302   | 311   | 278   | 289   | 311   | 310   | 322   | 82    | 73    | 107   | 84    | 92    | 84    | 94    | 289   | 286   | 306   | 247   | 359   | 349   | 348   | Ube2cbp |       |
| Ube2d1  | 5174  | 5034  | 6490  | 6891  | 7648  | 6847  | 7420  | 6591  | 5975  | 7592  | 6613  | 7382  | 6518  | 7756  | 5540  | 5165  | 6901  | 6650  | 7248  | 6192  | 7409  | 8417  | 5781  | 7548  | 8111  | 7288  | 6695  | 7614  | Ube2d1  |       |
| Ube2d2a | 9283  | 6807  | 9806  | 10070 | 10469 | 10617 | 11670 | 10679 | 8511  | 10396 | 10008 | 11486 | 10675 | 11995 | 9546  | 8001  | 9682  | 10069 | 10474 | 9825  | 10735 | 11571 | 8686  | 10963 | 11377 | 12181 | 10982 | 12060 | Ube2d2a |       |
| Ube2d3  | 24724 | 18646 | 22191 | 21650 | 22191 | 22550 | 25647 | 30157 | 25359 | 23370 | 25057 | 27410 | 26468 | 28938 | 25776 | 21029 | 22080 | 21734 | 21669 | 23664 | 24229 | 27902 | 26083 | 26474 | 25727 | 29784 | 27761 | 30720 | Ube2d3  |       |
| Ube2e1  | 6651  | 5251  | 7006  | 6159  | 6510  | 6232  | 7387  | 8888  | 7043  | 7497  | 7020  | 7679  | 8010  | 9114  | 6831  | 5803  | 6627  | 5887  | 6606  | 7136  | 6772  | 7723  | 7323  | 8180  | 7998  | 8888  | 8513  | 9137  | Ube2e1  |       |
| Ube2e2  | 1316  | 1145  | 1259  | 1498  | 1712  | 1536  | 1606  | 1883  | 1731  | 1895  | 1825  | 1551  | 1516  | 1680  | 1431  | 1199  | 1336  | 1537  | 1477  | 1465  | 1567  | 1871  | 1957  | 1745  | 1888  | 1537  | 1571  | 1550  | Ube2e2  |       |
| Ube2e3  | 7384  | 6315  | 7390  | 7102  | 8759  | 8408  | 8789  | 13854 | 11670 | 12775 | 11277 | 13380 | 12644 | 14294 | 8466  | 6317  | 746   |       |       |       |       |       |       |       |       |       |       |       |         |       |



|        |       |       |       |       |       |       |       |       |       |       |       |       |       |       |       |       |       |       |       |       |       |       |       |       |       |       |       |       |        |
|--------|-------|-------|-------|-------|-------|-------|-------|-------|-------|-------|-------|-------|-------|-------|-------|-------|-------|-------|-------|-------|-------|-------|-------|-------|-------|-------|-------|-------|--------|
| Ubl4a  | 2696  | 2345  | 2346  | 2301  | 2407  | 2543  | 2663  | 3350  | 3170  | 3082  | 2924  | 3701  | 3308  | 3626  | 2520  | 2203  | 2334  | 2170  | 2618  | 2364  | 2539  | 3342  | 3263  | 3291  | 3174  | 3914  | 3626  | 3882  | Ubl4a  |
| Ubl4b  | 17    | 10    | 19    | 7     | 7     | 1     | 2     | 23    | 13    | 14    | 14    | 18    | 17    | 15    | 9     | 9     | 1     | 2     | 0     | 5     | 4     | 8     | 17    | 34    | 17    | 41    | 17    | 18    | Ubl4b  |
| Ubl5   | 5560  | 6430  | 6065  | 6433  | 5998  | 5267  | 7771  | 5503  | 4578  | 5644  | 5677  | 5441  | 5905  | 7070  | 5731  | 4274  | 6544  | 6022  | 6313  | 6126  | 7530  | 5285  | 4592  | 6251  | 6058  | 6280  | 5847  | 7275  | Ubl5   |
| Ubl7   | 2397  | 2802  | 2808  | 3255  | 2923  | 2778  | 2961  | 2434  | 2810  | 3101  | 2775  | 3050  | 2745  | 3177  | 2471  | 2518  | 2845  | 2989  | 3160  | 2500  | 3073  | 3103  | 2707  | 3201  | 3015  | 3422  | 2779  | 3170  | Ubl7   |
| Ublcp1 | 4683  | 4132  | 4414  | 4005  | 3454  | 3512  | 4114  | 4187  | 3545  | 3163  | 3169  | 3761  | 3842  | 4199  | 4853  | 4315  | 4008  | 3656  | 3698  | 4053  | 3927  | 3347  | 3493  | 3446  | 3399  | 3904  | 4113  | 4167  | Ublcp1 |
| Ubn1   | 10649 | 11195 | 9482  | 11334 | 9398  | 10466 | 9715  | 9048  | 8525  | 9073  | 9257  | 9674  | 9409  | 9561  | 10163 | 11089 | 10210 | 10631 | 9489  | 8829  | 9952  | 8911  | 8495  | 9151  | 9527  | 8064  | 9903  | 9676  | Ubn1   |
| Ubn2   | 13229 | 10974 | 9688  | 11633 | 12334 | 15070 | 14534 | 17075 | 14368 | 12868 | 13654 | 13675 | 14232 | 15026 | 12612 | 12009 | 10804 | 11378 | 11875 | 13848 | 15538 | 13488 | 13045 | 11942 | 14753 | 10000 | 15336 | 13655 | Ubn2   |
| Ubox5  | 1553  | 1585  | 1227  | 1062  | 1037  | 1167  | 1259  | 1095  | 1331  | 994   | 1024  | 1240  | 1228  | 1276  | 1400  | 1345  | 1269  | 1047  | 1153  | 1276  | 1257  | 1043  | 1156  | 1219  | 1129  | 1464  | 1249  | 1375  | Ubox5  |
| Ubp1   | 15430 | 13984 | 15351 | 16505 | 16579 | 16741 | 17857 | 12225 | 11829 | 13931 | 12835 | 15122 | 13275 | 15035 | 14927 | 13886 | 15950 | 16372 | 16971 | 14688 | 17734 | 13739 | 11094 | 14149 | 14005 | 13905 | 13928 | 14571 | Ubp1   |
| Ubjn1  | 14479 | 14423 | 18669 | 18033 | 18056 | 16398 | 18372 | 12323 | 12297 | 14813 | 13495 | 15610 | 13768 | 15094 | 14479 | 13440 | 19060 | 18306 | 19286 | 14291 | 18303 | 14713 | 12007 | 15810 | 15486 | 16399 | 14256 | 15692 | Ubjn1  |
| Ubjn2  | 10746 | 10547 | 16011 | 14663 | 14974 | 13054 | 13692 | 12708 | 11683 | 16141 | 14060 | 18957 | 13615 | 18288 | 10744 | 10326 | 15552 | 14764 | 15520 | 10355 | 14550 | 19403 | 11687 | 17510 | 17854 | 20176 | 15080 | 17827 | Ubjn2  |
| Ubjn3  | 0     | 0     | 0     | 0     | 0     | 0     | 0     | 1     | 2     | 11    | 1     | 0     | 0     | 0     | 0     | 0     | 0     | 0     | 0     | 0     | 0     | 0     | 6     | 3     | 0     | 0     | 0     | 0     | Ubjn3  |
| Ubjn4  | 8140  | 9020  | 10240 | 9447  | 9428  | 8489  | 9093  | 7525  | 8307  | 9197  | 8263  | 10268 | 8966  | 10288 | 7777  | 8129  | 10819 | 9034  | 10394 | 7867  | 9359  | 8988  | 7655  | 10030 | 9596  | 11318 | 9726  | 10554 | Ubjn4  |
| Ubjn5  | 0     | 0     | 0     | 0     | 0     | 0     | 0     | 2     | 0     | 5     | 0     | 0     | 0     | 0     | 0     | 0     | 0     | 0     | 0     | 0     | 0     | 0     | 1     | 0     | 1     | 0     | 0     | 0     | Ubjn5  |
| Ubjnl  | 0     | 0     | 0     | 0     | 0     | 0     | 0     | 7     | 5     | 24    | 2     | 0     | 0     | 0     | 0     | 0     | 0     | 0     | 0     | 0     | 0     | 0     | 10    | 10    | 0     | 0     | 0     | 0     | Ubjnl  |
| Ubr1   | 5027  | 4075  | 3469  | 4417  | 5427  | 5460  | 5475  | 7956  | 7256  | 6427  | 6884  | 6862  | 6634  | 7151  | 5313  | 4251  | 3768  | 4261  | 4481  | 5619  | 5353  | 6843  | 6970  | 5704  | 6988  | 4886  | 7424  | 6563  | Ubr1   |
| Ubr2   | 10813 | 10803 | 9191  | 11664 | 12108 | 11691 | 11990 | 7574  | 7987  | 8482  | 8830  | 8285  | 8240  | 8526  | 9972  | 10554 | 10652 | 11523 | 11982 | 10166 | 12648 | 8751  | 7655  | 8228  | 8846  | 5100  | 7968  | 7944  | Ubr2   |
| Ubr3   | 16702 | 13669 | 11047 | 13993 | 16176 | 17334 | 17349 | 15880 | 14100 | 12609 | 13377 | 13876 | 14350 | 15281 | 17180 | 13981 | 12147 | 14087 | 13938 | 16789 | 17799 | 14001 | 13459 | 11534 | 14138 | 9602  | 14578 | 13981 | Ubr3   |
| Ubr4   | 19927 | 24062 | 14314 | 21971 | 25265 | 26367 | 23474 | 16751 | 20239 | 21377 | 21406 | 18661 | 20579 | 18714 | 18834 | 23601 | 16337 | 22920 | 22509 | 20130 | 27140 | 17161 | 18533 | 14792 | 22928 | 21000 | 20828 | 16231 | Ubr4   |
| Ubr5   | 27811 | 24750 | 17592 | 22691 | 26323 | 29193 | 29129 | 34166 | 31646 | 29637 | 29412 | 34207 | 32493 | 35766 | 27167 | 24707 | 19890 | 22922 | 24333 | 26712 | 29487 | 28754 | 29341 | 26269 | 32920 | 11361 | 36185 | 32325 | Ubr5   |
| Ubr7   | 13064 | 12788 | 10700 | 10411 | 8073  | 9592  | 10261 | 7184  | 6337  | 5514  | 5204  | 6745  | 5964  | 6886  | 12951 | 11456 | 10418 | 9738  | 9806  | 10870 | 10061 | 5718  | 6099  | 6201  | 5924  | 7904  | 7380  | 7195  | Ubr7   |
| Ubd1   | 919   | 1285  | 977   | 1340  | 983   | 992   | 768   | 432   | 564   | 522   | 654   | 399   | 488   | 405   | 945   | 1099  | 1109  | 1121  | 1019  | 941   | 886   | 436   | 589   | 485   | 412   | 573   | 440   | 414   | Ubd1   |
| Ubd2   | 2790  | 2871  | 3308  | 2791  | 2887  | 2951  | 2778  | 2530  | 2538  | 2342  | 2638  | 2928  | 2877  | 2897  | 2821  | 2631  | 2856  | 2744  | 3068  | 2592  | 2741  | 2643  | 2607  | 2781  | 2872  | 3025  | 2886  | 2968  | Ubd2   |
| Ubtf   | 5601  | 5924  | 7960  | 6631  | 6762  | 6533  | 6331  | 11258 | 12301 | 13886 | 12987 | 14106 | 12420 | 14192 | 5145  | 5270  | 7260  | 6099  | 7305  | 6141  | 6603  | 12064 | 12264 | 15274 | 14318 | 15987 | 13154 | 14587 | Ubtf   |
| Ubtff1 | 1     | 0     | 2     | 0     | 0     | 2     | 0     | 1     | 0     | 0     | 0     | 0     | 0     | 0     | 0     | 0     | 0     | 0     | 0     | 0     | 2     | 0     | 0     | 0     | 0     | 2     | 0     | 0     | Ubtff1 |
| Ubxn1  | 6786  | 7836  | 8137  | 7787  | 6365  | 6600  | 6857  | 5361  | 5885  | 6186  | 5907  | 6627  | 6151  | 6983  | 6502  | 6551  | 8233  | 7060  | 7139  | 7149  | 6847  | 5148  | 5758  | 7282  | 6406  | 8129  | 6593  | 7466  | Ubxn1  |
| Ubxn10 | 223   | 318   | 257   | 196   | 253   | 284   | 285   | 206   | 214   | 240   | 173   | 267   | 286   | 182   | 286   | 317   | 256   | 244   | 295   | 300   | 266   | 234   | 307   | 145   | 204   | 150   | 187   | 166   | Ubxn10 |
| Ubxn11 | 571   | 644   | 592   | 634   | 718   | 659   | 514   | 503   | 590   | 621   | 603   | 508   | 581   | 512   | 488   | 667   | 584   | 599   | 632   | 545   | 648   | 708   | 675   | 489   | 534   | 444   | 529   | 478   | Ubxn11 |
| Ubxn2a | 2731  | 2097  | 2290  | 2709  | 3691  | 3403  | 3930  | 2617  | 2308  | 2368  | 2420  | 2306  | 2208  | 2520  | 2937  | 2290  | 2407  | 3119  | 3321  | 3617  | 3699  | 2164  | 2385  | 2545  | 2639  | 2019  | 2170  | 2174  | Ubxn2a |
| Ubxn2b | 5928  | 5704  | 4968  | 6561  | 6213  | 6208  | 7382  | 4609  | 3751  | 3613  | 3463  | 4199  | 3818  | 4450  | 6494  | 5432  | 5480  | 6522  | 6162  | 6801  | 7158  | 4244  | 3660  | 3739  | 4055  | 3319  | 3946  | 4208  | Ubxn2b |
| Ubxn4  | 8920  | 8053  | 9333  | 9062  | 8811  | 8871  | 9456  | 9050  | 7806  | 8635  | 8538  | 8711  | 8899  | 9188  | 9525  | 8255  | 9254  | 8652  | 8864  | 8971  | 8610  | 8938  | 8381  | 8762  | 8910  | 8533  | 8794  | 9314  | Ubxn4  |
| Ubxn6  | 1912  | 2405  | 1968  | 2302  | 2790  | 2376  | 2443  | 3485  | 3685  | 3669  | 3440  | 3512  | 3334  | 3357  | 2028  | 1886  | 2365  | 2586  | 2884  | 2445  | 2585  | 3659  | 3750  | 3617  | 3869  | 3250  | 3516  | 3377  | Ubxn6  |
| Ubxn7  | 11900 | 9211  | 10447 | 11203 | 11936 | 12272 | 12351 | 16603 | 13196 | 12301 | 12505 | 13248 | 12826 | 14001 | 11586 | 10361 | 10244 | 10813 | 11413 | 12145 | 12387 | 14028 | 12705 | 12706 | 14505 | 13702 | 13702 | 14055 | Ubxn7  |
| Ubxn8  | 100   | 84    | 110   | 93    | 162   | 119   | 118   | 758   | 799   | 826   | 955   | 849   | 951   | 974   | 156   | 96    | 124   | 106   | 143   | 75    | 117   | 737   | 823   | 840   | 834   | 859   | 949   | 967   | Ubxn8  |
| Uchl1  | 12442 | 17404 | 17212 | 18129 | 25215 | 19861 | 22696 | 13572 | 15681 | 18213 | 15843 | 15660 | 15071 | 16782 | 14483 | 13952 | 20952 | 22210 | 24639 | 20833 | 22863 | 18563 | 14683 | 17594 | 21138 | 14723 | 14027 | 15507 | Uchl1  |
| Uchl3  | 5134  | 4600  | 4704  | 5130  | 4793  | 4521  | 6088  | 3684  | 2944  | 3032  | 2561  | 2747  | 2785  | 3168  | 5656  | 4513  | 4870  | 4676  | 5000  | 5957  | 5653  | 3329  | 3119  | 3058  | 3281  | 2990  | 2891  | 3070  | Uchl3  |
| Uchl4  | 133   | 149   | 153   | 135   | 116   | 134   | 125   | 88    | 60    | 74    | 74    | 56    | 61    | 93    | 148   | 150   | 115   | 101   | 158   | 187   | 130   | 95    | 68    | 58    | 71    | 70    | 77    | 61    | Uchl4  |
| Uchl5  | 4290  | 3387  | 4862  | 4464  | 3391  | 3557  | 4427  | 2637  | 2092  | 2428  | 2261  | 2861  | 2698  | 3100  | 4342  | 4009  | 4556  | 4096  | 3763  | 4228  | 3796  | 2321  | 2067  | 2596  | 2516  | 3540  | 3155  | 3140  | Uchl5  |
| Uck1   | 2979  | 3689  | 3085  | 3182  | 2773  | 2668  | 2696  | 2329  | 2530  | 2391  | 2344  | 2488  | 2279  | 2399  | 2736  | 3040  | 3147  | 2921  | 3081  | 2789  | 2756  | 2293  | 2433  | 2957  | 3672  | 3115  | 2496  | 2519  | Uck1   |
| Uck2   | 10754 | 10870 | 12371 | 10166 | 9773  | 9845  | 8823  | 9152  | 8811  | 9723  | 8567  | 11907 | 10760 | 11358 | 10300 | 10604 | 11443 | 9523  | 10555 | 9283  | 9153  | 8778  | 8300  | 10242 | 9931  | 13000 | 11802 | 11838 | Uck2   |
| Uck1   | 1028  | 1297  | 1215  | 1379  | 1286  | 1262  | 1250  | 1733  | 1772  | 1908  | 1772  | 2069  | 1749  | 1948  | 1063  | 1055  | 1360  | 1345  | 1364  | 1220  | 1222  | 1831  | 1762  | 1995  | 1719  | 1815  | 1908  | 1857  | Uck1   |
| Ucma   | 3     | 14    | 6     | 7     | 3     | 17    | 6     | 10    | 24    | 22    | 22    | 7     | 15    | 11    | 17    | 9     | 7     | 9     | 8     | 3     | 11    | 15    | 30    | 25    | 25    | 8     | 15    | 11    | Ucma   |
| Ucn    | 0     | 1     | 2     | 0     | 4     | 5     | 0     | 0     | 0     | 0     | 0     | 0     | 0     | 0     | 1     | 4     | 0     | 2     | 0     | 0     | 0     | 0     | 0     | 0     | 3     | 0     | 0     | 0     | Ucn    |
| Ucn2   | 23    | 38    | 39    | 38    | 32    | 45    | 34    | 16    | 30    | 27    | 11    | 16    | 22    | 19    | 22    | 51    | 32    | 37    | 41    | 7     | 28    | 12    | 27    | 31    | 6     | 17    | 29    | 25    | Ucn2   |
| Ucn3   | 0     | 0     | 0     | 0     | 1     | 0     | 0     | 0     | 0     | 0     | 0     | 0     | 0     | 0     | 0     | 0     | 0     | 0     | 0     | 2     | 0     | 0     | 1     | 0     | 0     | 0     | 0     | 0     | Ucn3   |
| Ucp1   | 29    | 22    | 14    | 42    | 55    | 32    | 34    | 26    | 24    | 13    | 26    | 15    | 19    | 21    | 24    | 27    | 42    | 51    | 45    | 26    | 49    | 35    | 20    | 11    | 15    | 23    | 10    | 9     | Ucp1   |
| Ucp2   | 3984  | 4488  | 4447  | 3478  | 2544  | 2829  | 2375  | 1833  | 2313  | 2578  | 2553  | 2052  | 2700  | 1995  | 3558  | 5238  | 3979  | 2960  | 2614  | 2270  | 2288  | 1788  | 3108  | 2392  | 1558  | 2977  | 1905  | 2428  | Ucp2   |
| Ucp3   | 5     | 3     | 7     | 7     | 5     | 2     | 10    | 2     |       |       |       |       |       |       |       |       |       |       |       |       |       |       |       |       |       |       |       |       |        |

|           |       |       |       |       |       |       |       |       |       |       |       |       |       |       |       |       |       |       |       |       |       |       |       |       |       |       |       |       |           |
|-----------|-------|-------|-------|-------|-------|-------|-------|-------|-------|-------|-------|-------|-------|-------|-------|-------|-------|-------|-------|-------|-------|-------|-------|-------|-------|-------|-------|-------|-----------|
| Uhmk1     | 9661  | 8229  | 7184  | 8240  | 8516  | 8717  | 8651  | 10667 | 8993  | 8672  | 9108  | 9091  | 10098 | 9396  | 9807  | 8794  | 7645  | 7791  | 7648  | 8531  | 8420  | 9117  | 8904  | 7871  | 8882  | 6643  | 10060 | 9439  | Uhmk1     |
| Uhrf1     | 13615 | 15247 | 18020 | 13114 | 9611  | 10935 | 11145 | 8375  | 10444 | 9016  | 8808  | 14767 | 11995 | 13868 | 12028 | 13794 | 15586 | 11872 | 12970 | 11408 | 10581 | 6495  | 8570  | 11832 | 9714  | 18192 | 15092 | 15469 | Uhrf1     |
| Uhrf1bp1  | 6429  | 7403  | 6056  | 8154  | 7662  | 7122  | 6968  | 3642  | 4128  | 4451  | 4154  | 4399  | 4433  | 4126  | 6125  | 7363  | 6684  | 7920  | 7542  | 6214  | 7242  | 4204  | 3777  | 3872  | 4165  | 3177  | 4386  | 4199  | Uhrf1bp1  |
| Uhrf1bp11 | 4599  | 4118  | 3716  | 4224  | 5105  | 4991  | 5439  | 6609  | 5737  | 6507  | 6192  | 6910  | 6345  | 6584  | 4474  | 4252  | 4081  | 4524  | 4696  | 4502  | 5172  | 6470  | 5565  | 5624  | 6678  | 4828  | 6656  | 6376  | Uhrf1bp11 |
| Uhrf2     | 9780  | 9140  | 9595  | 10198 | 9447  | 9395  | 10229 | 12320 | 10254 | 9815  | 9733  | 10636 | 9815  | 10982 | 9948  | 9641  | 9800  | 9645  | 10066 | 10178 | 10218 | 10193 | 10400 | 10474 | 10498 | 10769 | 10815 | 10853 | Uhrf2     |
| Ulmc1     | 2337  | 1938  | 2461  | 2214  | 2130  | 2251  | 2387  | 2884  | 2609  | 2504  | 2530  | 2746  | 2544  | 3015  | 2335  | 2036  | 2153  | 2138  | 2251  | 2345  | 2342  | 2572  | 2512  | 2780  | 2528  | 3072  | 2695  | 2828  | Ulmc1     |
| Ulbp1     | 23    | 9     | 6     | 7     | 12    | 12    | 13    | 12    | 2     | 6     | 6     | 0     | 6     | 4     | 42    | 12    | 9     | 8     | 7     | 9     | 13    | 12    | 8     | 7     | 10    | 4     | 12    | 30    | Ulbp1     |
| Ulk1      | 6989  | 9062  | 8236  | 11377 | 10716 | 9674  | 9243  | 6487  | 7518  | 8772  | 7993  | 9910  | 8053  | 8196  | 6610  | 8541  | 10213 | 11994 | 11144 | 7665  | 10094 | 9728  | 6673  | 9470  | 10099 | 8452  | 8075  | 8270  | Ulk1      |
| Ulk2      | 7087  | 6365  | 6890  | 7230  | 9056  | 8229  | 8267  | 13061 | 11504 | 11339 | 10929 | 11058 | 10998 | 11070 | 8057  | 6711  | 7260  | 7912  | 7864  | 8195  | 8437  | 13886 | 11343 | 10544 | 12935 | 9329  | 10802 | 11127 | Ulk2      |
| Ulk3      | 1225  | 1170  | 1499  | 1660  | 1950  | 1610  | 1793  | 1308  | 1498  | 1832  | 1733  | 1743  | 1505  | 1628  | 1116  | 1092  | 1765  | 1742  | 1815  | 1380  | 1883  | 2037  | 1436  | 1843  | 1897  | 1783  | 1570  | 1556  | Ulk3      |
| Ulk4      | 833   | 967   | 796   | 772   | 676   | 725   | 638   | 597   | 665   | 609   | 533   | 654   | 795   | 599   | 818   | 824   | 775   | 691   | 794   | 853   | 753   | 501   | 650   | 668   | 615   | 640   | 774   | 685   | Ulk4      |
| Umad1     | 1311  | 1120  | 1208  | 1494  | 1536  | 1385  | 1630  | 1154  | 924   | 912   | 1028  | 842   | 849   | 917   | 1543  | 1326  | 1254  | 1459  | 1304  | 1503  | 1587  | 1295  | 1015  | 948   | 1012  | 838   | 817   | 945   | Umad1     |
| Umod      | 0     | 0     | 0     | 0     | 0     | 0     | 0     | 0     | 0     | 0     | 0     | 0     | 0     | 1     | 0     | 0     | 0     | 0     | 0     | 0     | 0     | 0     | 0     | 0     | 0     | 0     | 0     | 0     | Umod      |
| Umod11    | 13    | 5     | 3     | 3     | 3     | 1     | 6     | 16    | 12    | 35    | 11    | 1     | 15    | 3     | 5     | 12    | 2     | 8     | 1     | 9     | 5     | 5     | 14    | 17    | 6     | 33    | 3     | 5     | Umod11    |
| Umps      | 5424  | 5314  | 4833  | 3903  | 3066  | 3718  | 3869  | 3975  | 3678  | 3240  | 3255  | 3918  | 3809  | 4124  | 4900  | 4831  | 4446  | 3781  | 3815  | 4405  | 3666  | 2707  | 3607  | 3715  | 3338  | 5075  | 4487  | 4679  | Umps      |
| Unc119    | 2222  | 2574  | 2315  | 2576  | 2401  | 2414  | 2204  | 2076  | 2349  | 2388  | 2156  | 2607  | 2268  | 2368  | 2011  | 2245  | 2626  | 2351  | 2752  | 2452  | 2401  | 2122  | 2308  | 2344  | 2361  | 2946  | 2432  | 2397  | Unc119    |
| Unc119b   | 8173  | 9606  | 9589  | 8703  | 6769  | 7290  | 7365  | 4731  | 4837  | 4798  | 4509  | 6169  | 5753  | 5679  | 7544  | 8588  | 9070  | 8194  | 8623  | 7510  | 7121  | 4037  | 4666  | 5682  | 5154  | 6525  | 6223  | 5967  | Unc119b   |
| Unc13a    | 8213  | 11934 | 10564 | 19433 | 20228 | 16206 | 18625 | 5388  | 5717  | 8461  | 6617  | 6501  | 4862  | 6097  | 9066  | 9386  | 15518 | 20314 | 20097 | 13873 | 19605 | 9705  | 5229  | 7351  | 9548  | 3258  | 5196  | 5131  | Unc13a    |
| Unc13b    | 10070 | 10750 | 8630  | 10834 | 11315 | 11884 | 11895 | 9640  | 8864  | 8853  | 7441  | 9556  | 8802  | 9655  | 10934 | 9559  | 9555  | 10797 | 10949 | 11394 | 12066 | 9570  | 8770  | 8066  | 9568  | 6904  | 9902  | 9181  | Unc13b    |
| Unc13c    | 102   | 125   | 101   | 197   | 449   | 396   | 298   | 460   | 468   | 327   | 495   | 215   | 227   | 218   | 196   | 131   | 90    | 227   | 253   | 398   | 312   | 466   | 513   | 229   | 433   | 154   | 193   | 167   | Unc13c    |
| Unc13d    | 53    | 97    | 97    | 78    | 85    | 47    | 51    | 60    | 105   | 67    | 92    | 88    | 104   | 84    | 45    | 92    | 100   | 99    | 113   | 85    | 60    | 114   | 118   | 116   | 111   | 93    | 120   | 89    | Unc13d    |
| Unc45a    | 4839  | 5662  | 5552  | 6429  | 5810  | 5524  | 5336  | 3381  | 3031  | 4669  | 4267  | 4380  | 4427  | 4050  | 4519  | 5143  | 5925  | 6212  | 6121  | 4636  | 5554  | 4279  | 3748  | 4624  | 4382  | 4363  | 4112  | 4232  | Unc45a    |
| Unc45b    | 48    | 33    | 55    | 29    | 57    | 66    | 36    | 67    | 197   | 82    | 612   | 43    | 76    | 31    | 53    | 65    | 35    | 43    | 52    | 52    | 46    | 152   | 432   | 83    | 36    | 35    | 24    | 49    | Unc45b    |
| Unc50     | 2934  | 2737  | 2532  | 2530  | 2353  | 2443  | 2501  | 2945  | 2583  | 2343  | 2543  | 2590  | 2536  | 2471  | 3070  | 2595  | 2749  | 2398  | 2480  | 2812  | 2403  | 2516  | 2763  | 2651  | 2559  | 2811  | 2753  | 2537  | Unc50     |
| Unc5a     | 820   | 1240  | 1251  | 1772  | 2099  | 1581  | 1626  | 662   | 901   | 996   | 877   | 722   | 493   | 605   | 901   | 903   | 1890  | 1919  | 2021  | 1536  | 1713  | 1166  | 861   | 922   | 1159  | 758   | 526   | 497   | Unc5a     |
| Unc5b     | 4346  | 4650  | 6199  | 5272  | 4167  | 4095  | 3941  | 2120  | 2470  | 2749  | 2522  | 3463  | 2950  | 3104  | 3621  | 4106  | 5474  | 4828  | 4766  | 3501  | 4012  | 2620  | 2334  | 3083  | 2598  | 3416  | 3540  | 3862  | Unc5b     |
| Unc5c     | 3787  | 3614  | 2841  | 2498  | 2928  | 3590  | 2046  | 7739  | 7668  | 6909  | 8050  | 4541  | 7367  | 4674  | 4487  | 4871  | 2359  | 2484  | 1993  | 3144  | 2156  | 8163  | 8478  | 3921  | 5946  | 3030  | 5746  | 4650  | Unc5c     |
| Unc5cl    | 1     | 1     | 0     | 0     | 0     | 0     | 0     | 0     | 5     | 0     | 0     | 0     | 0     | 0     | 1     | 1     | 0     | 0     | 0     | 0     | 0     | 0     | 0     | 0     | 0     | 0     | 0     | 0     | Unc5cl    |
| Unc5d     | 1069  | 813   | 591   | 1825  | 2689  | 2324  | 2461  | 2053  | 2034  | 2064  | 1810  | 1144  | 1359  | 1346  | 1094  | 903   | 1166  | 1979  | 2339  | 2228  | 2813  | 2284  | 1721  | 1649  | 2615  | 699   | 1047  | 910   | Unc5d     |
| Unc79     | 1043  | 1173  | 777   | 1381  | 2246  | 2038  | 2235  | 3546  | 3522  | 4040  | 3460  | 3515  | 2987  | 3428  | 1275  | 909   | 1059  | 1501  | 1866  | 1670  | 2243  | 4338  | 2785  | 3193  | 4581  | 1516  | 3309  | 2908  | Unc79     |
| Unc80     | 321   | 428   | 271   | 524   | 977   | 874   | 781   | 837   | 933   | 887   | 955   | 538   | 526   | 535   | 473   | 408   | 397   | 592   | 588   | 807   | 904   | 1029  | 822   | 556   | 927   | 331   | 543   | 430   | Unc80     |
| Unc93a    | 1     | 0     | 0     | 1     | 1     | 0     | 2     | 0     | 1     | 0     | 0     | 2     | 0     | 0     | 4     | 0     | 1     | 0     | 0     | 1     | 0     | 0     | 3     | 0     | 0     | 0     | 0     | 1     | Unc93a    |
| Unc93a2   | 0     | 0     | 0     | 0     | 0     | 2     | 0     | 0     | 0     | 0     | 0     | 0     | 0     | 0     | 0     | 0     | 0     | 0     | 0     | 0     | 0     | 0     | 0     | 0     | 0     | 0     | 0     | 0     | Unc93a2   |
| Unc93b1   | 324   | 396   | 360   | 286   | 331   | 294   | 217   | 286   | 424   | 346   | 426   | 351   | 380   | 293   | 320   | 467   | 302   | 361   | 237   | 281   | 244   | 336   | 548   | 378   | 317   | 363   | 338   | 277   | Unc93b1   |
| Uncx      | 621   | 1024  | 1350  | 1273  | 919   | 960   | 448   | 1072  | 834   | 1279  | 987   | 1347  | 1709  | 1051  | 758   | 772   | 1604  | 874   | 1035  | 989   | 572   | 1445  | 808   | 1244  | 1257  | 1269  | 1361  | 1360  | Uncx      |
| Ung       | 1615  | 1900  | 2132  | 2331  | 1523  | 1517  | 1749  | 883   | 1188  | 1038  | 1093  | 1931  | 1379  | 1606  | 1469  | 1621  | 1900  | 1856  | 1792  | 1626  | 1560  | 732   | 977   | 1517  | 1184  | 2590  | 1720  | 1889  | Ung       |
| Unk       | 2370  | 2860  | 3307  | 3301  | 3313  | 3028  | 2927  | 3037  | 3792  | 4390  | 4197  | 5142  | 4394  | 4550  | 2211  | 1524  | 3526  | 3126  | 3744  | 2598  | 3060  | 4062  | 3596  | 4842  | 4603  | 4763  | 4528  | 4446  | Unk       |
| Unkl      | 1295  | 1466  | 1646  | 1645  | 1649  | 1547  | 1292  | 1023  | 1267  | 1392  | 1316  | 1265  | 1401  | 1133  | 1139  | 1406  | 1523  | 1639  | 1532  | 1231  | 1358  | 1355  | 1221  | 1264  | 1444  | 1130  | 1204  | 1116  | Unkl      |
| Uox       | 0     | 0     | 0     | 1     | 0     | 1     | 0     | 1     | 0     | 3     | 0     | 0     | 0     | 0     | 0     | 0     | 0     | 0     | 0     | 0     | 0     | 0     | 1     | 2     | 0     | 0     | 0     | 0     | Uox       |
| Upb1      | 5     | 6     | 8     | 7     | 2     | 3     | 1     | 4     | 16    | 11    | 9     | 4     | 16    | 2     | 7     | 16    | 0     | 15    | 9     | 3     | 5     | 8     | 16    | 12    | 7     | 6     | 5     | 7     | Upb1      |
| Upf1      | 5905  | 7074  | 8981  | 8910  | 7576  | 6710  | 6326  | 5023  | 6126  | 7099  | 7100  | 8564  | 6856  | 7232  | 5076  | 6690  | 8869  | 8298  | 8067  | 5506  | 6958  | 7072  | 5644  | 8173  | 7303  | 9088  | 6842  | 7160  | Upf1      |
| Upf2      | 9250  | 8203  | 8852  | 8946  | 8183  | 8376  | 9614  | 7355  | 6529  | 6047  | 6256  | 6738  | 6434  | 7439  | 9245  | 8770  | 8820  | 8442  | 8249  | 9436  | 8539  | 6151  | 6204  | 6547  | 6022  | 6141  | 6743  | 6565  | Upf2      |
| Upf3a     | 1024  | 900   | 1056  | 1002  | 1186  | 1008  | 1069  | 2906  | 2874  | 3653  | 3262  | 3598  | 3476  | 3853  | 959   | 855   | 1133  | 986   | 1110  | 1029  | 1114  | 3021  | 2932  | 3662  | 3420  | 4035  | 3574  | 3805  | Upf3a     |
| Upf3b     | 6123  | 4793  | 6410  | 6924  | 6536  | 6517  | 7677  | 5848  | 4959  | 6002  | 5179  | 6273  | 5818  | 7193  | 6115  | 5285  | 6584  | 6729  | 6726  | 6715  | 7098  | 5959  | 4550  | 6423  | 6284  | 6250  | 6254  | 6761  | Upf3b     |
| Upk1a     | 161   | 226   | 212   | 241   | 217   | 154   | 193   | 77    | 73    | 45    | 38    | 87    | 84    | 76    | 157   | 178   | 234   | 202   | 184   | 178   | 187   | 77    | 52    | 78    | 87    | 78    | 57    | 102   | Upk1a     |
| Upk1b     | 116   | 168   | 119   | 14    | 6     | 162   | 1     | 159   | 207   | 82    | 229   | 174   | 231   | 203   | 219   | 174   | 39    | 113   | 30    | 13    | 0     | 7     | 293   | 129   | 32    | 29    | 150   | 260   | Upk1b     |
| Upk2      | 20    | 7     | 3     | 1     | 2     | 4     | 0     | 13    | 26    | 19    | 18    | 10    | 3     | 1     | 11    | 7     | 6     | 0     | 1     | 1     | 1     | 2     | 30    | 16    | 0     | 5     | 0     | 5     | Upk2      |
| Upk3a     | 3     | 9     | 0     | 12    | 6     | 11    | 4     | 2     | 9     | 10    | 8     | 5     | 3     | 4     | 9     | 5     | 3     | 2     | 9     | 3     | 12    | 0     | 19    | 4     | 5     | 7     | 6     | 1     | Upk3a     |
| Upk3b     | 7     | 4     | 10    | 7     | 1     | 11    | 6     | 5     | 8     | 6     | 6     | 2     | 9     | 12    | 3     | 12    | 1     | 6     | 3     | 3     | 0     | 2     | 2     | 3     | 5     | 1     | 3     | 6     | Upk3b     |
| Upk3bl    | 35    | 39    | 15    | 4     | 1     | 36    | 3     |       |       |       |       |       |       |       |       |       |       |       |       |       |       |       |       |       |       |       |       |       |           |

|        |       |       |       |       |       |       |       |       |       |       |       |       |       |       |       |       |       |       |       |       |       |       |       |       |       |       |       |       |        |
|--------|-------|-------|-------|-------|-------|-------|-------|-------|-------|-------|-------|-------|-------|-------|-------|-------|-------|-------|-------|-------|-------|-------|-------|-------|-------|-------|-------|-------|--------|
| Ush1g  | 18    | 35    | 30    | 26    | 31    | 16    | 11    | 0     | 2     | 7     | 2     | 5     | 7     | 4     | 25    | 42    | 39    | 15    | 29    | 13    | 20    | 5     | 3     | 0     | 2     | 1     | 1     | 2     | Ush1g  |
| Ush2a  | 32    | 35    | 22    | 15    | 29    | 21    | 18    | 45    | 47    | 32    | 28    | 14    | 44    | 19    | 28    | 40    | 19    | 21    | 13    | 36    | 27    | 38    | 40    | 7     | 31    | 7     | 20    | 13    | Ush2a  |
| Ushbp1 | 156   | 185   | 193   | 163   | 194   | 182   | 163   | 405   | 521   | 559   | 744   | 547   | 685   | 495   | 144   | 176   | 190   | 199   | 192   | 190   | 157   | 576   | 647   | 556   | 600   | 594   | 500   | 482   | Ushbp1 |
| Usp1   | 11003 | 10100 | 10593 | 10084 | 9979  | 10559 | 10861 | 8954  | 8319  | 8393  | 8846  | 8806  | 9126  | 8801  | 11333 | 10316 | 9926  | 10529 | 10246 | 9713  | 10301 | 9326  | 8739  | 8366  | 8573  | 8130  | 9223  | 8878  | Usp1   |
| Usp1   | 16958 | 12436 | 15416 | 12163 | 10177 | 12152 | 14096 | 12389 | 10853 | 9320  | 9424  | 14781 | 12445 | 15822 | 15841 | 13277 | 13123 | 11568 | 11759 | 13773 | 12242 | 8246  | 9382  | 12191 | 10543 | 17437 | 15316 | 16338 | Usp1   |
| Usp10  | 5567  | 6520  | 6987  | 7011  | 6104  | 5799  | 6451  | 5211  | 6316  | 6370  | 6120  | 8113  | 7243  | 7465  | 5297  | 6301  | 7064  | 6631  | 6887  | 5458  | 6542  | 6346  | 5997  | 7210  | 6701  | 8416  | 6866  | 7833  | Usp10  |
| Usp11  | 13034 | 14462 | 14417 | 16296 | 14278 | 14378 | 14881 | 10335 | 11294 | 12250 | 11035 | 12492 | 11428 | 11780 | 13457 | 13119 | 15325 | 15600 | 15582 | 12362 | 15153 | 13540 | 10771 | 12079 | 12041 | 11111 | 11352 | 11430 | Usp11  |
| Usp12  | 5038  | 5069  | 5438  | 5564  | 5744  | 5471  | 5140  | 4540  | 4472  | 4772  | 4726  | 4576  | 4817  | 4541  | 5186  | 5136  | 5577  | 5496  | 5211  | 5494  | 5354  | 4458  | 4238  | 4268  | 4654  | 4273  | 4357  | 4555  | Usp12  |
| Usp13  | 784   | 733   | 896   | 913   | 1434  | 1132  | 977   | 1465  | 1443  | 1604  | 1593  | 1361  | 1382  | 1405  | 938   | 870   | 918   | 924   | 1175  | 982   | 1071  | 1591  | 1276  | 1200  | 1536  | 1131  | 1348  | 1244  | Usp13  |
| Usp14  | 12514 | 10420 | 11292 | 11251 | 11520 | 11235 | 13366 | 10243 | 8843  | 7698  | 8302  | 8954  | 8974  | 9451  | 13813 | 11499 | 11089 | 11361 | 11083 | 13169 | 12240 | 9504  | 8638  | 8060  | 8540  | 9660  | 9793  | 9606  | Usp14  |
| Usp15  | 11318 | 9649  | 8391  | 9284  | 8639  | 8897  | 9802  | 9300  | 8174  | 7084  | 7116  | 6913  | 6854  | 7097  | 11207 | 10390 | 8025  | 8942  | 8193  | 10427 | 9556  | 7653  | 7836  | 6321  | 7249  | 6019  | 6901  | 6577  | Usp15  |
| Usp16  | 6216  | 5091  | 5045  | 5092  | 4660  | 5059  | 5244  | 5561  | 4463  | 4403  | 4737  | 4548  | 4369  | 4845  | 6345  | 5829  | 4664  | 5033  | 4431  | 5435  | 5061  | 4898  | 4669  | 4439  | 4577  | 4524  | 4580  | 4519  | Usp16  |
| Usp17b | 0     | 0     | 0     | 0     | 2     | 0     | 0     | 1     | 1     | 0     | 0     | 0     | 0     | 0     | 0     | 0     | 0     | 0     | 0     | 0     | 0     | 0     | 0     | 0     | 0     | 0     | 0     | 0     | Usp17b |
| Usp17c | 0     | 1     | 0     | 0     | 0     | 0     | 0     | 0     | 0     | 0     | 0     | 0     | 0     | 0     | 0     | 0     | 0     | 0     | 0     | 0     | 0     | 0     | 0     | 0     | 0     | 0     | 0     | 0     | Usp17c |
| Usp17d | 0     | 0     | 0     | 0     | 0     | 0     | 0     | 0     | 0     | 0     | 0     | 0     | 0     | 0     | 0     | 0     | 0     | 0     | 0     | 0     | 0     | 0     | 0     | 0     | 0     | 1     | 0     | 1     | Usp17d |
| Usp17e | 0     | 0     | 0     | 0     | 0     | 0     | 0     | 0     | 0     | 0     | 0     | 0     | 0     | 0     | 0     | 0     | 0     | 0     | 0     | 0     | 0     | 0     | 1     | 0     | 1     | 0     | 0     | 0     | Usp17e |
| Usp18  | 45    | 55    | 54    | 52    | 55    | 46    | 47    | 23    | 27    | 25    | 37    | 30    | 33    | 35    | 67    | 63    | 76    | 45    | 38    | 86    | 80    | 33    | 40    | 48    | 33    | 60    | 41    | 38    | Usp18  |
| Usp19  | 9881  | 11760 | 12468 | 12623 | 12077 | 11188 | 10977 | 10595 | 12466 | 13663 | 12350 | 14893 | 13140 | 13183 | 9286  | 10576 | 13354 | 12555 | 13465 | 10248 | 11309 | 13042 | 11857 | 14982 | 14022 | 14029 | 13391 | 13347 | Usp19  |
| Usp20  | 1009  | 1168  | 1345  | 1205  | 831   | 844   | 896   | 260   | 337   | 299   | 393   | 371   | 357   | 354   | 994   | 1150  | 1187  | 1030  | 997   | 773   | 861   | 286   | 393   | 347   | 284   | 456   | 357   | 390   | Usp20  |
| Usp20  | 5742  | 7872  | 6675  | 8248  | 7031  | 6845  | 6464  | 2751  | 3139  | 3239  | 3034  | 3207  | 2994  | 2842  | 5591  | 6615  | 7553  | 8214  | 7638  | 6106  | 6806  | 3614  | 3054  | 3166  | 3468  | 2937  | 2751  | 2740  | Usp20  |
| Usp21  | 2510  | 2910  | 3250  | 3336  | 3623  | 3134  | 3303  | 4183  | 4642  | 5078  | 4765  | 5261  | 4797  | 5089  | 2462  | 2517  | 3458  | 3323  | 3956  | 2688  | 3455  | 5085  | 4410  | 5610  | 5098  | 6114  | 4921  | 5150  | Usp21  |
| Usp22  | 21191 | 21572 | 19460 | 22729 | 26543 | 24516 | 24868 | 31051 | 32238 | 32039 | 30135 | 32197 | 30199 | 31257 | 21473 | 19644 | 21811 | 23896 | 25535 | 22681 | 25111 | 37460 | 29679 | 30951 | 36061 | 28146 | 30932 | 31507 | Usp22  |
| Usp24  | 6827  | 5824  | 4560  | 4985  | 6752  | 7416  | 6876  | 11195 | 11117 | 9428  | 10256 | 10671 | 10622 | 10779 | 6721  | 6287  | 4622  | 5340  | 6227  | 7165  | 7284  | 8597  | 10372 | 8081  | 10651 | 6753  | 11390 | 9843  | Usp24  |
| Usp25  | 8198  | 6953  | 7151  | 7356  | 6486  | 6952  | 7230  | 3107  | 2961  | 2778  | 2877  | 3341  | 2998  | 3208  | 7590  | 7653  | 7238  | 6902  | 6704  | 6239  | 7089  | 2453  | 2851  | 2982  | 2609  | 3361  | 3356  | 3437  | Usp25  |
| Usp26  | 5     | 2     | 0     | 0     | 0     | 1     | 1     | 1     | 1     | 0     | 1     | 0     | 1     | 1     | 12    | 6     | 5     | 0     | 1     | 2     | 0     | 0     | 3     | 3     | 6     | 3     | 8     | 0     | Usp26  |
| Usp27x | 1144  | 1100  | 1163  | 1446  | 1419  | 1234  | 1419  | 1167  | 1116  | 1182  | 1168  | 1037  | 1016  | 1112  | 1077  | 1006  | 1228  | 1323  | 1400  | 1195  | 1387  | 1445  | 997   | 1119  | 1299  | 1061  | 1024  | 1108  | Usp27x |
| Usp28  | 10207 | 9896  | 8889  | 9594  | 8663  | 9538  | 9677  | 4513  | 4209  | 3992  | 4462  | 4738  | 4662  | 4732  | 9901  | 10273 | 9013  | 9708  | 8839  | 8512  | 9481  | 4582  | 4025  | 4113  | 4367  | 4401  | 4953  | 4828  | Usp28  |
| Usp29  | 4456  | 4821  | 3417  | 6487  | 7248  | 7043  | 7752  | 5948  | 5167  | 5467  | 5296  | 4249  | 3901  | 4786  | 5330  | 3935  | 4810  | 6660  | 6618  | 7053  | 7873  | 7055  | 4807  | 4998  | 6147  | 3295  | 3920  | 3863  | Usp29  |
| Usp3   | 7478  | 6486  | 6101  | 6719  | 7231  | 7581  | 8209  | 9703  | 8408  | 8501  | 7258  | 9488  | 8324  | 9823  | 7547  | 5882  | 6829  | 6666  | 8020  | 7518  | 8448  | 8819  | 8000  | 8845  | 9420  | 9214  | 9284  | 9890  | Usp3   |
| Usp30  | 2610  | 2923  | 2831  | 3099  | 2873  | 2837  | 2670  | 2017  | 2235  | 2394  | 2296  | 2412  | 2184  | 2286  | 2420  | 2574  | 2825  | 2899  | 2999  | 2549  | 2848  | 2313  | 2174  | 2463  | 2463  | 2423  | 2395  | 2362  | Usp30  |
| Usp31  | 6061  | 5757  | 4969  | 6583  | 6560  | 6225  | 6498  | 4439  | 4120  | 4038  | 4104  | 4176  | 3926  | 4179  | 5916  | 5877  | 5320  | 6398  | 5912  | 5671  | 6638  | 4587  | 3600  | 3545  | 4682  | 3125  | 4278  | 3986  | Usp31  |
| Usp32  | 10843 | 9607  | 6930  | 10571 | 11885 | 12329 | 13504 | 9384  | 7618  | 7707  | 7174  | 7332  | 7245  | 7538  | 11743 | 9544  | 8793  | 10736 | 10682 | 11830 | 13470 | 8722  | 7535  | 6537  | 8429  | 4538  | 7224  | 7066  | Usp32  |
| Usp33  | 15034 | 13136 | 11874 | 13176 | 14192 | 14306 | 16024 | 11416 | 9460  | 9231  | 9074  | 8843  | 8529  | 9308  | 16751 | 14240 | 13004 | 14093 | 13711 | 16083 | 15214 | 10955 | 9569  | 8817  | 9940  | 7871  | 8906  | 8947  | Usp33  |
| Usp34  | 21339 | 16669 | 10292 | 12908 | 16007 | 19898 | 18877 | 30602 | 27107 | 20266 | 21066 | 20822 | 21836 | 22161 | 21149 | 18700 | 11400 | 12935 | 13944 | 21120 | 19661 | 19308 | 25009 | 15872 | 21573 | 13524 | 23585 | 19719 | Usp34  |
| Usp35  | 1321  | 1477  | 1584  | 1761  | 1964  | 1825  | 1697  | 801   | 1063  | 1132  | 1101  | 1001  | 1065  | 938   | 1346  | 1551  | 1703  | 1898  | 1861  | 1438  | 1691  | 1168  | 977   | 1103  | 1286  | 756   | 938   | 949   | Usp35  |
| Usp36  | 3456  | 3994  | 4044  | 4477  | 3959  | 3824  | 3245  | 2646  | 3187  | 3353  | 3526  | 3650  | 3317  | 3220  | 2988  | 3809  | 4052  | 4468  | 4025  | 3215  | 3539  | 3469  | 2939  | 3588  | 3650  | 3491  | 3382  | 3405  | Usp36  |
| Usp37  | 8416  | 7490  | 6777  | 7483  | 6144  | 6902  | 7841  | 6721  | 5852  | 5364  | 5184  | 6358  | 5668  | 6150  | 8304  | 7807  | 6991  | 7657  | 6245  | 7707  | 7244  | 5350  | 5461  | 5646  | 5651  | 5766  | 6574  | 6566  | Usp37  |
| Usp38  | 7698  | 7607  | 6382  | 6612  | 5393  | 6561  | 6823  | 4220  | 3927  | 3497  | 3409  | 4397  | 4010  | 4293  | 7453  | 7313  | 6388  | 6431  | 5587  | 6158  | 6342  | 3850  | 3659  | 3660  | 3834  | 4181  | 4135  | 4271  | Usp38  |
| Usp39  | 370   | 195   | 163   | 192   | 175   | 199   | 184   | 222   | 297   | 106   | 118   | 130   | 120   | 123   | 368   | 217   | 174   | 503   | 179   | 334   | 153   | 167   | 235   | 143   | 266   | 156   | 146   | 127   | Usp39  |
| Usp4   | 13652 | 14329 | 11753 | 12803 | 12458 | 13592 | 13118 | 13280 | 12591 | 12572 | 11459 | 12801 | 12433 | 13365 | 13634 | 12486 | 11947 | 12915 | 13266 | 13080 | 13729 | 12880 | 11951 | 12072 | 13438 | 12524 | 13710 | 13416 | Usp4   |
| Usp40  | 2719  | 2123  | 1854  | 1788  | 2086  | 2217  | 2169  | 5163  | 5371  | 4445  | 4855  | 5004  | 4985  | 4827  | 2391  | 2092  | 1859  | 1675  | 2006  | 2341  | 2026  | 4318  | 5308  | 4191  | 4401  | 3949  | 5216  | 4480  | Usp40  |
| Usp42  | 3751  | 4160  | 4135  | 4467  | 4480  | 4338  | 4347  | 4731  | 4957  | 5528  | 5428  | 6024  | 5700  | 5636  | 3737  | 4058  | 4497  | 4470  | 4732  | 3882  | 4630  | 5725  | 4704  | 5594  | 6027  | 5368  | 5703  | 5835  | Usp42  |
| Usp43  | 212   | 181   | 176   | 181   | 123   | 119   | 92    | 117   | 137   | 140   | 101   | 141   | 132   | 144   | 144   | 227   | 172   | 150   | 126   | 76    | 88    | 132   | 156   | 156   | 84    | 153   | 116   | 140   | Usp43  |
| Usp44  | 1547  | 1748  | 1787  | 1146  | 737   | 787   | 884   | 237   | 163   | 143   | 156   | 387   | 357   | 423   | 1452  | 1375  | 1648  | 978   | 810   | 1066  | 903   | 160   | 124   | 257   | 179   | 360   | 673   | 540   | Usp44  |
| Usp45  | 5404  | 4344  | 4564  | 4741  | 4583  | 4901  | 5116  | 3563  | 3228  | 2868  | 3206  | 3569  | 3706  | 3686  | 4961  | 4807  | 4745  | 4486  | 4432  | 4802  | 4941  | 3163  | 3183  | 3163  | 3314  | 3013  | 3611  | 3724  | Usp45  |
| Usp46  | 4960  | 3806  | 3988  | 3498  | 4111  | 4093  | 3784  | 5716  | 5497  | 4836  | 5005  | 4688  | 5059  | 4855  | 4688  | 4715  | 3584  | 3854  | 3887  | 3797  | 3860  | 5227  | 5519  | 4895  | 4935  | 5266  | 4997  | 5102  | Usp46  |
| Usp47  | 24119 | 20793 | 17333 | 18712 | 20909 | 21711 | 23258 | 28050 | 24175 | 21328 | 20946 | 22802 | 22299 | 23911 | 24788 | 20531 | 18665 | 19570 | 19999 | 24112 | 2     |       |       |       |       |       |       |       |        |

|        |       |       |       |       |       |       |       |       |       |       |       |       |       |       |       |       |       |       |       |       |       |       |       |       |       |       |       |        |        |       |
|--------|-------|-------|-------|-------|-------|-------|-------|-------|-------|-------|-------|-------|-------|-------|-------|-------|-------|-------|-------|-------|-------|-------|-------|-------|-------|-------|-------|--------|--------|-------|
| Uxs1   | 2307  | 1972  | 2084  | 1923  | 1847  | 1921  | 1979  | 1912  | 1801  | 1813  | 2044  | 1705  | 1859  | 1977  | 2151  | 2225  | 2022  | 2029  | 1545  | 1919  | 1828  | 1808  | 2001  | 1929  | 1891  | 2037  | 1675  | 1914   | Uxs1   |       |
| Uxt    | 452   | 507   | 414   | 406   | 344   | 406   | 469   | 673   | 594   | 506   | 534   | 577   | 665   | 765   | 443   | 393   | 414   | 307   | 424   | 496   | 454   | 434   | 541   | 640   | 551   | 719   | 816   | 828    | Uxt    |       |
| V1ra8  | 0     | 0     | 0     | 0     | 0     | 0     | 0     | 0     | 1     | 0     | 0     | 0     | 0     | 0     | 0     | 0     | 0     | 0     | 0     | 0     | 0     | 0     | 0     | 0     | 0     | 0     | 0     | 0      | 0      | V1ra8 |
| Vac14  | 2694  | 3490  | 3269  | 3298  | 3210  | 3138  | 3229  | 2434  | 2679  | 2838  | 2622  | 3281  | 2990  | 3279  | 2735  | 3019  | 3621  | 3329  | 3678  | 2785  | 3306  | 2856  | 2642  | 2792  | 3222  | 3063  | 3109  | 3122   | Vac14  |       |
| Vamp1  | 2169  | 2345  | 2136  | 2467  | 2317  | 2170  | 2225  | 1037  | 980   | 1131  | 1218  | 1085  | 1266  | 1109  | 2123  | 2079  | 2296  | 2345  | 2121  | 2120  | 2107  | 1140  | 1029  | 1012  | 1075  | 952   | 1194  | 1146   | Vamp1  |       |
| Vamp2  | 7988  | 8689  | 9943  | 14350 | 15144 | 12280 | 13502 | 8223  | 8170  | 11474 | 11200 | 9465  | 8096  | 10078 | 7900  | 8329  | 12681 | 15407 | 13913 | 9761  | 15160 | 13416 | 8225  | 10645 | 12152 | 9207  | 7398  | 8848   | Vamp2  |       |
| Vamp3  | 8623  | 7515  | 8413  | 6733  | 4814  | 5845  | 6296  | 5442  | 5309  | 4663  | 5159  | 5569  | 5443  | 5607  | 8297  | 8412  | 6825  | 6155  | 5615  | 6278  | 5907  | 4562  | 5834  | 5233  | 4513  | 6417  | 5948  | 5876   | Vamp3  |       |
| Vamp4  | 4675  | 3578  | 3887  | 3830  | 4056  | 4158  | 4568  | 3489  | 3152  | 2849  | 3233  | 2988  | 3138  | 3066  | 4916  | 4291  | 3899  | 4000  | 4063  | 4416  | 4381  | 3367  | 3382  | 3133  | 3222  | 2937  | 3004  | 3165   | Vamp4  |       |
| Vamp5  | 3     | 1     | 1     | 5     | 1     | 3     | 1     | 27    | 3     | 8     | 3     | 3     | 7     | 4     | 7     | 6     | 8     | 1     | 6     | 5     | 6     | 8     | 25    | 7     | 3     | 3     | 8     | 5      | Vamp5  |       |
| Vamp8  | 25    | 14    | 12    | 9     | 8     | 18    | 2     | 37    | 29    | 23    | 24    | 21    | 24    | 18    | 29    | 51    | 3     | 8     | 9     | 14    | 6     | 17    | 32    | 31    | 10    | 180   | 16    | 23     | Vamp8  |       |
| Vamp9  | 2     | 6     | 0     | 5     | 8     | 8     | 6     | 10    | 8     | 19    | 11    | 5     | 11    | 11    | 3     | 5     | 2     | 4     | 10    | 6     | 4     | 5     | 11    | 4     | 5     | 7     | 2     | 13     | Vamp9  |       |
| Vangl1 | 944   | 872   | 993   | 823   | 837   | 771   | 660   | 696   | 943   | 953   | 1122  | 659   | 1040  | 695   | 916   | 1078  | 782   | 777   | 680   | 668   | 694   | 1051  | 1205  | 764   | 784   | 779   | 808   | 751    | Vangl1 |       |
| Vangl2 | 8463  | 9876  | 13964 | 13084 | 13234 | 11398 | 11746 | 10549 | 10662 | 13140 | 10314 | 15371 | 13904 | 14793 | 8925  | 8826  | 14325 | 11996 | 14385 | 11228 | 11982 | 12952 | 9499  | 14452 | 14670 | 14204 | 14292 | 15021  | Vangl2 |       |
| Vapa   | 6547  | 5768  | 6882  | 7430  | 7004  | 6344  | 7917  | 6942  | 6466  | 7276  | 6634  | 7090  | 6787  | 8705  | 6531  | 6486  | 7057  | 6967  | 7337  | 6980  | 7402  | 7200  | 6319  | 7254  | 7276  | 7902  | 6524  | 7937   | Vapa   |       |
| Vapb   | 7428  | 8257  | 9180  | 9448  | 9551  | 8760  | 8882  | 7591  | 7785  | 9460  | 8828  | 9112  | 8349  | 9017  | 7642  | 7537  | 9392  | 9141  | 9044  | 7614  | 9020  | 9028  | 8095  | 8966  | 9506  | 7887  | 8958  | 8791   | Vapb   |       |
| Vars   | 7147  | 8823  | 11419 | 9454  | 8089  | 7859  | 6900  | 6165  | 7911  | 8796  | 8678  | 12332 | 9426  | 10014 | 6341  | 8082  | 10515 | 9136  | 10065 | 6369  | 7721  | 7693  | 7497  | 11137 | 9088  | 14146 | 9929  | 10531  | Vars   |       |
| Vars2  | 1980  | 2518  | 2801  | 2943  | 2815  | 2405  | 2352  | 1926  | 2408  | 2469  | 2351  | 2711  | 2479  | 2425  | 1944  | 2223  | 2941  | 2725  | 2804  | 2199  | 2338  | 2264  | 2148  | 2788  | 2526  | 2734  | 2392  | 2371   | Vars2  |       |
| Vash1  | 2848  | 4054  | 4253  | 4505  | 5205  | 4734  | 3979  | 3736  | 4449  | 5305  | 4713  | 5224  | 4393  | 5490  | 2933  | 3360  | 4546  | 4604  | 5647  | 4177  | 4356  | 4904  | 4311  | 5802  | 6074  | 4728  | 4650  | 4551   | Vash1  |       |
| Vash2  | 3203  | 2828  | 3246  | 3104  | 4116  | 3728  | 3737  | 5400  | 5419  | 5777  | 6189  | 5038  | 5358  | 5228  | 3072  | 2845  | 3501  | 3266  | 3725  | 3242  | 3578  | 6380  | 5671  | 5257  | 6227  | 5286  | 4951  | 5239   | Vash2  |       |
| Vasn   | 731   | 1057  | 761   | 644   | 421   | 697   | 356   | 641   | 1100  | 927   | 1240  | 686   | 1141  | 618   | 744   | 1185  | 625   | 801   | 398   | 383   | 359   | 884   | 1143  | 889   | 667   | 948   | 853   | 698    | Vasn   |       |
| Vasp   | 4864  | 5544  | 6522  | 5890  | 4956  | 4713  | 4640  | 2838  | 3164  | 3274  | 3993  | 3326  | 3366  | 3329  | 4458  | 4965  | 5886  | 5474  | 5470  | 3960  | 4776  | 2984  | 3510  | 3568  | 3314  | 4312  | 3377  | 3582   | Vasp   |       |
| Vat1   | 12557 | 16088 | 16404 | 16453 | 14304 | 13859 | 13080 | 9039  | 10135 | 10671 | 10282 | 9937  | 10331 | 10535 | 12924 | 12756 | 17040 | 15250 | 16760 | 12630 | 14817 | 10611 | 9990  | 11212 | 11217 | 9078  | 9630  | 10531  | Vat1   |       |
| Vat1l  | 6060  | 6550  | 6172  | 6419  | 8674  | 6763  | 7701  | 4769  | 4806  | 5052  | 4303  | 4457  | 4439  | 3864  | 6440  | 5529  | 6670  | 6839  | 7531  | 7520  | 8351  | 6401  | 6378  | 3871  | 4544  | 3321  | 4035  | 4093   | Vat1l  |       |
| Vav1   | 106   | 108   | 159   | 65    | 92    | 106   | 61    | 116   | 138   | 145   | 179   | 152   | 129   | 101   | 80    | 114   | 80    | 113   | 64    | 94    | 72    | 117   | 190   | 131   | 102   | 192   | 141   | 123    | Vav1   |       |
| Vav2   | 5159  | 6411  | 7354  | 8144  | 8790  | 7842  | 7323  | 4560  | 4419  | 5788  | 5549  | 6595  | 6087  | 5968  | 5287  | 5461  | 8020  | 7987  | 9192  | 6600  | 7870  | 6231  | 4620  | 5819  | 6325  | 4991  | 6448  | 6165   | Vav2   |       |
| Vav3   | 1583  | 1375  | 1741  | 1634  | 1904  | 1968  | 1705  | 3126  | 1898  | 2443  | 2362  | 2578  | 2999  | 2627  | 1953  | 1478  | 1627  | 1554  | 1865  | 1760  | 1752  | 3332  | 2574  | 2495  | 2663  | 1678  | 2994  | 3084   | Vav3   |       |
| Vax1   | 157   | 153   | 27    | 221   | 227   | 163   | 337   | 216   | 325   | 339   | 289   | 509   | 28    | 417   | 158   | 69    | 213   | 200   | 279   | 158   | 230   | 393   | 172   | 642   | 409   | 798   | 260   | 249    | Vax1   |       |
| Vax2   | 35    | 54    | 83    | 45    | 34    | 43    | 35    | 1     | 2     | 1     | 1     | 4     | 1     | 3     | 41    | 48    | 102   | 52    | 54    | 43    | 45    | 5     | 4     | 7     | 2     | 2     | 3     | 5      | Vax2   |       |
| Vbp1   | 7303  | 5620  | 7200  | 7499  | 7664  | 7676  | 9308  | 9968  | 7674  | 7885  | 7108  | 8805  | 8351  | 9766  | 8884  | 6421  | 7345  | 7567  | 7618  | 9037  | 8619  | 9454  | 7992  | 8545  | 8794  | 9236  | 8808  | 9824   | Vbp1   |       |
| Vcam1  | 4137  | 3997  | 3573  | 3037  | 3309  | 4260  | 3007  | 6075  | 5779  | 5310  | 6072  | 5182  | 7563  | 5417  | 4832  | 4810  | 3581  | 3596  | 3498  | 4040  | 3419  | 5429  | 6745  | 5396  | 4927  | 5317  | 5828  | 6217   | Vcam1  |       |
| Vcan   | 36727 | 26510 | 13052 | 16882 | 18638 | 29708 | 20072 | 66100 | 71753 | 41622 | 56223 | 39890 | 44673 | 42279 | 31302 | 34057 | 13903 | 18944 | 16404 | 26011 | 21001 | 35735 | 65920 | 34186 | 40658 | 31892 | 42961 | 33729  | Vcan   |       |
| Vcl    | 17353 | 15867 | 13058 | 10174 | 7894  | 10143 | 7916  | 4971  | 6143  | 4832  | 6999  | 5123  | 6717  | 4878  | 15609 | 19745 | 10277 | 11239 | 7611  | 7800  | 8073  | 4944  | 7265  | 4471  | 4124  | 4722  | 6200  | 5292   | Vcl    |       |
| Vcp    | 50033 | 45671 | 46355 | 42256 | 41154 | 43414 | 41915 | 47096 | 40706 | 42264 | 40262 | 47534 | 46899 | 49656 | 47178 | 42760 | 42900 | 43493 | 46076 | 39593 | 43980 | 42745 | 42529 | 45002 | 44644 | 55136 | 50498 | 53235  | Vcp    |       |
| Vcpip1 | 9498  | 8178  | 7827  | 10361 | 9372  | 9847  | 10351 | 7823  | 6490  | 6752  | 6939  | 7419  | 7265  | 7271  | 10130 | 9598  | 8611  | 10534 | 8785  | 9427  | 10273 | 7615  | 6518  | 6278  | 7579  | 5841  | 7442  | 6991   | Vcpip1 |       |
| Vcpkmt | 917   | 808   | 937   | 948   | 884   | 943   | 976   | 1059  | 1000  | 901   | 1097  | 961   | 1043  | 939   | 931   | 845   | 953   | 871   | 921   | 975   | 944   | 917   | 963   | 1143  | 1024  | 997   | 1044  | Vcpkmt |        |       |
| Vdac1  | 21648 | 22020 | 22243 | 21155 | 20073 | 19528 | 21325 | 18075 | 17752 | 16848 | 17239 | 17766 | 17517 | 19100 | 21859 | 20295 | 21345 | 20860 | 21231 | 20955 | 21489 | 18314 | 18188 | 18166 | 18414 | 19973 | 18193 | 19536  | Vdac1  |       |
| Vdac2  | 14076 | 13504 | 12975 | 12277 | 11292 | 11129 | 11297 | 10857 | 9252  | 8977  | 9262  | 10270 | 9844  | 10459 | 14377 | 13043 | 12889 | 12193 | 12323 | 12929 | 12439 | 9586  | 9692  | 9568  | 9662  | 10939 | 10831 | 11049  | Vdac2  |       |
| Vdac3  | 11003 | 9227  | 10165 | 9505  | 9426  | 9468  | 11073 | 11251 | 9870  | 9373  | 9864  | 10490 | 9815  | 10894 | 11388 | 9749  | 10185 | 9760  | 9940  | 10820 | 10236 | 9966  | 9736  | 10087 | 9958  | 11765 | 11203 | 12167  | Vdac3  |       |
| Vdr    | 510   | 386   | 342   | 241   | 165   | 187   | 174   | 51    | 63    | 54    | 106   | 18    | 18    | 11    | 414   | 600   | 289   | 318   | 150   | 180   | 159   | 48    | 55    | 67    | 30    | 58    | 27    | 27     | Vdr    |       |
| Vegfa  | 6114  | 5467  | 7506  | 6981  | 7036  | 6887  | 5886  | 5576  | 6283  | 7579  | 7290  | 6211  | 6118  | 6965  | 5185  | 5798  | 7740  | 7222  | 7308  | 5720  | 6334  | 6271  | 6536  | 7645  | 6965  | 7082  | 6301  | 6641   | Vegfa  |       |
| Vegfb  | 1261  | 1419  | 1610  | 1469  | 1234  | 1198  | 1210  | 1067  | 1274  | 1509  | 1492  | 1502  | 1331  | 1345  | 1033  | 1217  | 1670  | 1465  | 1548  | 1133  | 1382  | 1250  | 1261  | 1587  | 1283  | 1650  | 1285  | 1299   | Vegfb  |       |
| Vegfc  | 331   | 232   | 342   | 315   | 291   | 245   | 292   | 381   | 407   | 423   | 512   | 521   | 416   | 445   | 302   | 308   | 265   | 218   | 341   | 259   | 247   | 398   | 507   | 439   | 371   | 633   | 452   | 549    | Vegfc  |       |
| Vegfd  | 92    | 68    | 97    | 55    | 65    | 89    | 37    | 115   | 185   | 150   | 283   | 113   | 179   | 87    | 133   | 102   | 60    | 90    | 48    | 45    | 37    | 152   | 253   | 122   | 116   | 119   | 122   | 96     | Vegfd  |       |
| Veph1  | 1122  | 1183  | 1412  | 658   | 452   | 1197  | 406   | 1515  | 1357  | 1246  | 1243  | 1815  | 2056  | 1912  | 1398  | 1474  | 954   | 930   | 588   | 552   | 491   | 1300  | 1691  | 1407  | 1392  | 1178  | 2090  | 2040   | Veph1  |       |
| Vezi1  | 430   | 242   | 359   | 390   | 304   | 349   | 341   | 481   | 323   | 320   | 360   | 408   | 418   | 847   | 421   | 319   | 324   | 458   | 383   | 411   | 315   | 521   | 324   | 394   | 425   | 409   | 450   | 406    | Vezi1  |       |
| Vezt   | 9797  | 9900  | 7950  | 9199  | 10316 | 10430 | 11318 | 11057 | 9852  | 8916  | 7990  | 8421  | 8378  | 9020  | 11068 | 9337  | 9029  | 9018  | 9825  | 12755 | 11346 | 10210 | 9282  | 8120  | 9890  | 6747  | 8536  | 8179   | Vezt   |       |
| Vgf    | 144   | 190   | 163   | 294   | 412   | 277   | 260   | 106   | 157   | 217   | 172   | 98    | 112   | 65    | 156   | 181   | 214   | 353   | 301   | 220   | 282   | 252   | 136   | 131   | 253   | 57    | 49    | 55     | Vgf    |       |
| Vgl1   | 5     | 11    | 0     | 0     | 0     | 16    | 1     | 13    | 17    | 12    | 9     | 16    | 37    | 16    | 8     | 9     | 0     |       |       |       |       |       |       |       |       |       |       |        |        |       |





|         |       |       |       |       |       |       |       |       |       |       |       |       |       |       |       |       |       |       |       |       |       |       |       |       |       |       |       |       |         |
|---------|-------|-------|-------|-------|-------|-------|-------|-------|-------|-------|-------|-------|-------|-------|-------|-------|-------|-------|-------|-------|-------|-------|-------|-------|-------|-------|-------|-------|---------|
| Vmn2r56 | 1     | 2     | 0     | 4     | 0     | 1     | 2     | 0     | 0     | 0     | 1     | 1     | 1     | 0     | 5     | 1     | 1     | 2     | 1     | 0     | 4     | 0     | 1     | 2     | 0     | 0     | 0     | 2     | Vmn2r56 |
| Vmn2r57 | 63    | 38    | 26    | 76    | 50    | 45    | 57    | 45    | 48    | 60    | 81    | 28    | 48    | 52    | 51    | 48    | 71    | 53    | 52    | 42    | 59    | 50    | 42    | 53    | 36    | 60    | 48    | 45    | Vmn2r57 |
| Vmn2r6  | 0     | 0     | 0     | 0     | 0     | 0     | 0     | 0     | 0     | 0     | 0     | 0     | 0     | 0     | 0     | 0     | 0     | 0     | 0     | 0     | 0     | 0     | 3     | 0     | 0     | 0     | 0     | 0     | Vmn2r6  |
| Vmn2r7  | 1     | 0     | 0     | 0     | 0     | 0     | 1     | 4     | 0     | 0     | 0     | 0     | 0     | 0     | 1     | 0     | 2     | 1     | 0     | 0     | 0     | 0     | 0     | 0     | 0     | 0     | 0     | 0     | Vmn2r7  |
| Vmn2r73 | 0     | 0     | 0     | 0     | 0     | 0     | 0     | 0     | 0     | 0     | 0     | 0     | 0     | 0     | 0     | 0     | 0     | 0     | 0     | 0     | 0     | 0     | 0     | 2     | 0     | 0     | 0     | 0     | Vmn2r73 |
| Vmn2r79 | 0     | 0     | 0     | 0     | 0     | 0     | 0     | 0     | 0     | 1     | 0     | 0     | 0     | 0     | 0     | 0     | 0     | 0     | 0     | 0     | 0     | 0     | 0     | 0     | 0     | 0     | 0     | 0     | Vmn2r79 |
| Vmn2r81 | 1     | 0     | 0     | 0     | 0     | 0     | 0     | 0     | 0     | 0     | 0     | 0     | 0     | 0     | 0     | 0     | 0     | 0     | 0     | 0     | 0     | 0     | 0     | 0     | 0     | 0     | 0     | 0     | Vmn2r81 |
| Vmn2r82 | 0     | 0     | 0     | 4     | 0     | 0     | 1     | 1     | 0     | 0     | 0     | 0     | 0     | 1     | 0     | 3     | 0     | 0     | 0     | 0     | 0     | 0     | 0     | 0     | 2     | 0     | 0     | 0     | Vmn2r82 |
| Vmn2r83 | 0     | 0     | 0     | 0     | 0     | 4     | 0     | 0     | 0     | 0     | 0     | 0     | 0     | 0     | 0     | 2     | 0     | 0     | 0     | 0     | 0     | 0     | 0     | 0     | 0     | 0     | 0     | 0     | Vmn2r83 |
| Vmn2r84 | 6     | 5     | 5     | 7     | 21    | 14    | 31    | 5     | 1     | 8     | 2     | 2     | 5     | 4     | 21    | 12    | 17    | 43    | 19    | 6     | 36    | 7     | 6     | 6     | 3     | 4     | 6     | 2     | Vmn2r84 |
| Vmn2r85 | 2     | 10    | 5     | 13    | 10    | 13    | 22    | 15    | 7     | 12    | 5     | 2     | 10    | 2     | 9     | 9     | 13    | 14    | 9     | 19    | 20    | 7     | 7     | 5     | 8     | 4     | 9     | 4     | Vmn2r85 |
| Vmn2r86 | 15    | 6     | 5     | 22    | 19    | 9     | 10    | 15    | 8     | 8     | 14    | 3     | 11    | 5     | 7     | 11    | 5     | 7     | 19    | 4     | 13    | 7     | 4     | 7     | 3     | 5     | 7     | 7     | Vmn2r86 |
| Vmn2r87 | 55    | 43    | 59    | 62    | 111   | 106   | 104   | 77    | 73    | 52    | 72    | 72    | 82    | 57    | 67    | 47    | 63    | 114   | 103   | 62    | 93    | 62    | 50    | 55    | 71    | 37    | 65    | 76    | Vmn2r87 |
| Vmn2r90 | 0     | 0     | 0     | 0     | 1     | 0     | 0     | 0     | 0     | 3     | 0     | 5     | 0     | 0     | 0     | 0     | 0     | 0     | 0     | 0     | 4     | 0     | 1     | 2     | 0     | 0     | 1     | 0     | Vmn2r90 |
| Vmn2r96 | 0     | 0     | 0     | 0     | 0     | 0     | 0     | 0     | 0     | 0     | 0     | 0     | 0     | 0     | 0     | 0     | 0     | 0     | 0     | 0     | 0     | 0     | 0     | 0     | 1     | 0     | 0     | 0     | Vmn2r96 |
| Vmo1    | 0     | 1     | 3     | 2     | 0     | 1     | 0     | 6     | 2     | 5     | 8     | 1     | 7     | 1     | 4     | 8     | 5     | 4     | 3     | 0     | 1     | 7     | 11    | 2     | 0     | 4     | 3     | 6     | Vmo1    |
| Vmp1    | 4597  | 4164  | 4189  | 3765  | 3580  | 3408  | 3957  | 4030  | 3378  | 3122  | 2896  | 3069  | 3159  | 3409  | 5098  | 4575  | 2823  | 3909  | 3438  | 4371  | 3704  | 3429  | 3774  | 3134  | 3012  | 3457  | 3218  | 3408  | Vmp1    |
| Vnn1    | 50    | 68    | 104   | 19    | 16    | 27    | 12    | 34    | 72    | 38    | 73    | 50    | 98    | 64    | 80    | 95    | 323   | 46    | 14    | 5     | 8     | 45    | 61    | 47    | 33    | 51    | 83    | 69    | Vnn1    |
| Vnn3    | 1     | 0     | 0     | 2     | 2     | 5     | 3     | 0     | 2     | 8     | 2     | 0     | 0     | 0     | 3     | 3     | 0     | 0     | 1     | 6     | 0     | 5     | 2     | 3     | 5     | 0     | 1     | 1     | Vnn3    |
| Vopp1   | 8395  | 8066  | 8573  | 10047 | 13011 | 10782 | 11534 | 12563 | 10696 | 12014 | 10645 | 10660 | 10309 | 11477 | 9918  | 7142  | 9769  | 10551 | 11482 | 11307 | 11617 | 13521 | 10223 | 11039 | 12736 | 10520 | 10144 | 10981 | Vopp1   |
| Vpreb1  | 1     | 2     | 4     | 1     | 1     | 9     | 6     | 33    | 26    | 30    | 46    | 17    | 27    | 20    | 3     | 1     | 3     | 2     | 2     | 1     | 2     | 23    | 26    | 20    | 23    | 28    | 23    | 21    | Vpreb1  |
| Vpreb2  | 0     | 0     | 0     | 0     | 1     | 0     | 0     | 1     | 0     | 0     | 0     | 2     | 2     | 0     | 0     | 0     | 0     | 0     | 0     | 0     | 1     | 0     | 1     | 0     | 0     | 0     | 0     | 0     | Vpreb2  |
| Vpreb3  | 2     | 5     | 0     | 6     | 3     | 4     | 8     | 4     | 1     | 0     | 3     | 0     | 0     | 1     | 0     | 8     | 2     | 4     | 2     | 1     | 3     | 0     | 3     | 2     | 0     | 5     | 0     | 0     | Vpreb3  |
| Vps11   | 4139  | 5148  | 3743  | 4245  | 4064  | 4093  | 4152  | 3863  | 3766  | 3481  | 3309  | 3875  | 3633  | 3452  | 4134  | 4076  | 4273  | 4218  | 4327  | 4415  | 4380  | 3623  | 3897  | 3538  | 3876  | 3407  | 3817  | 3647  | Vps11   |
| Vps13a  | 10105 | 7952  | 4657  | 5790  | 5291  | 7351  | 7063  | 5333  | 4563  | 3011  | 3285  | 3523  | 3932  | 3764  | 10077 | 9387  | 4969  | 5663  | 5086  | 8925  | 6999  | 2700  | 4517  | 2836  | 3433  | 2115  | 4114  | 3478  | Vps13a  |
| Vps13b  | 5632  | 4278  | 1776  | 2224  | 2877  | 3754  | 3004  | 6427  | 6257  | 3817  | 4594  | 3321  | 4227  | 3475  | 5230  | 4997  | 1858  | 2392  | 2291  | 4095  | 3475  | 3225  | 6218  | 2752  | 3763  | 2187  | 4068  | 3188  | Vps13b  |
| Vps13c  | 7690  | 8111  | 3497  | 5600  | 6622  | 8145  | 7451  | 6896  | 6576  | 4241  | 4993  | 4405  | 4735  | 4750  | 8294  | 7615  | 4446  | 5827  | 5517  | 9314  | 8313  | 4224  | 5734  | 3257  | 5118  | 2182  | 5452  | 3757  | Vps13c  |
| Vps13d  | 9081  | 8719  | 3754  | 5388  | 6102  | 8107  | 6492  | 7421  | 7414  | 5202  | 6479  | 4570  | 4985  | 4797  | 8591  | 8261  | 3912  | 5273  | 5029  | 8176  | 7784  | 4742  | 6850  | 3783  | 6229  | 2818  | 5861  | 4184  | Vps13d  |
| Vps16   | 5375  | 5955  | 5597  | 5863  | 5317  | 5517  | 5782  | 5506  | 5644  | 5601  | 5188  | 6197  | 5642  | 6087  | 5222  | 4950  | 5777  | 5328  | 5732  | 5730  | 5567  | 4859  | 5410  | 5829  | 5714  | 6734  | 6240  | 6224  | Vps16   |
| Vps18   | 1944  | 2625  | 2868  | 2828  | 2806  | 2422  | 2126  | 1842  | 2318  | 2336  | 2404  | 2652  | 2248  | 2326  | 1843  | 2356  | 2807  | 2715  | 2936  | 1978  | 2425  | 2232  | 2174  | 2504  | 2424  | 2709  | 2328  | 2340  | Vps18   |
| Vps25   | 36    | 21    | 41    | 23    | 28    | 46    | 34    | 29    | 40    | 68    | 25    | 50    | 32    | 27    | 9     | 48    | 46    | 40    | 15    | 21    | 29    | 48    | 29    | 31    | 57    | 62    | 41    | 44    | Vps25   |
| Vps26a  | 8728  | 7446  | 8502  | 7379  | 6567  | 7186  | 8617  | 5150  | 4345  | 4414  | 4199  | 5344  | 4835  | 5312  | 8931  | 8235  | 7478  | 7520  | 7215  | 8180  | 7648  | 4238  | 4500  | 4987  | 4439  | 5648  | 5417  | 5680  | Vps26a  |
| Vps26b  | 9296  | 8826  | 8821  | 12048 | 11980 | 11095 | 11808 | 8435  | 7375  | 9085  | 8364  | 8649  | 7837  | 8593  | 8950  | 8161  | 10594 | 11988 | 12520 | 9639  | 13271 | 9651  | 7991  | 9042  | 10052 | 7711  | 7717  | 8532  | Vps26b  |
| Vps26c  | 5039  | 5856  | 4764  | 4412  | 4093  | 4044  | 4101  | 3813  | 3565  | 3139  | 3161  | 2859  | 3032  | 3078  | 5219  | 5355  | 4464  | 4314  | 4321  | 4963  | 4224  | 3521  | 3705  | 3009  | 3265  | 3072  | 3131  | 3078  | Vps26c  |
| Vps28   | 2933  | 3341  | 2639  | 3054  | 3290  | 2877  | 3339  | 3748  | 3264  | 3538  | 2874  | 2999  | 3111  | 3393  | 3363  | 2515  | 3354  | 3110  | 3150  | 3442  | 3220  | 3254  | 3240  | 3389  | 3422  | 3066  | 3276  | 2969  | Vps28   |
| Vps29   | 7367  | 6612  | 7058  | 6921  | 6667  | 7100  | 7654  | 5735  | 5145  | 4988  | 4969  | 4739  | 5011  | 5158  | 7439  | 6855  | 6918  | 6965  | 6846  | 7656  | 7653  | 5511  | 5303  | 4998  | 5412  | 4917  | 5136  | 5293  | Vps29   |
| Vps33a  | 4111  | 4525  | 3721  | 4456  | 5375  | 4794  | 4912  | 5475  | 5586  | 5941  | 5411  | 5592  | 5610  | 5633  | 4491  | 4076  | 4263  | 4540  | 4950  | 4652  | 5217  | 6037  | 5222  | 5197  | 6366  | 4393  | 5671  | 5579  | Vps33a  |
| Vps33b  | 2491  | 2747  | 2740  | 3094  | 2819  | 2828  | 2733  | 2027  | 1978  | 2219  | 2039  | 2259  | 2116  | 2157  | 2498  | 2475  | 2895  | 2987  | 3108  | 2433  | 2742  | 2692  | 1906  | 2241  | 2249  | 2126  | 2331  | 2146  | Vps33b  |
| Vps35   | 25202 | 21009 | 20176 | 19096 | 17743 | 18721 | 22274 | 20548 | 16637 | 14100 | 14021 | 14872 | 14983 | 16225 | 27077 | 22797 | 19091 | 19173 | 18434 | 24412 | 20673 | 15938 | 16977 | 14016 | 14663 | 15186 | 15543 | 16211 | Vps35   |
| Vps35l  | 4133  | 4635  | 3708  | 3715  | 3904  | 3971  | 4007  | 6332  | 6369  | 5887  | 5187  | 5943  | 5608  | 5596  | 4321  | 3985  | 3509  | 3812  | 3920  | 4276  | 4144  | 6066  | 6274  | 5585  | 6204  | 5517  | 5986  | 5420  | Vps35l  |
| Vps36   | 4277  | 3809  | 4298  | 4103  | 4458  | 4036  | 4626  | 6161  | 5487  | 5628  | 4987  | 5928  | 5329  | 6402  | 4261  | 3669  | 4406  | 4008  | 4283  | 4507  | 4371  | 5177  | 5176  | 5569  | 5662  | 6458  | 6105  | 6189  | Vps36   |
| Vps37a  | 8887  | 7083  | 5864  | 7580  | 7697  | 8651  | 8887  | 6974  | 5862  | 5254  | 5679  | 5337  | 5410  | 5848  | 8500  | 8122  | 6654  | 7644  | 7161  | 8897  | 8796  | 6009  | 5874  | 4911  | 5645  | 4154  | 5545  | 5253  | Vps37a  |
| Vps37b  | 2704  | 3587  | 3924  | 4367  | 3823  | 3290  | 3619  | 2507  | 2796  | 3313  | 2922  | 3506  | 2851  | 3178  | 2823  | 3133  | 4245  | 4271  | 4024  | 3196  | 3869  | 3263  | 2779  | 3489  | 3761  | 3513  | 2831  | 3131  | Vps37b  |
| Vps37c  | 1004  | 1286  | 1586  | 1476  | 1568  | 1286  | 1406  | 1255  | 1818  | 1968  | 1768  | 1934  | 1715  | 1723  | 1106  | 1216  | 1749  | 1579  | 1755  | 1138  | 1440  | 1826  | 1731  | 1868  | 1960  | 2229  | 1729  | 1708  | Vps37c  |
| Vps37d  | 845   | 1111  | 1192  | 1204  | 1564  | 1318  | 1262  | 1503  | 1543  | 1808  | 1590  | 1629  | 1442  | 1621  | 829   | 805   | 1353  | 1196  | 1638  | 1266  | 1273  | 1641  | 1564  | 1752  | 1850  | 1556  | 1550  | 1457  | Vps37d  |
| Vps39   | 6343  | 6941  | 5361  | 6624  | 6599  | 6944  | 6550  | 7350  | 7264  | 6274  | 6098  | 6523  | 6457  | 6389  | 6597  | 5939  | 5638  | 6287  | 6453  | 7040  | 6893  | 6781  | 6899  | 6320  | 7145  | 5426  | 6754  | 6262  | Vps39   |
| Vps41   | 7553  | 7503  | 6109  | 6595  | 7499  | 7356  | 7729  | 10944 | 9172  | 7921  | 7729  | 8073  | 8125  | 8283  | 9112  | 7546  | 6478  | 6851  | 6899  | 8417  | 7654  | 9789  | 9412  | 7661  | 8912  | 7592  | 8648  | 8204  | Vps41   |
| Vps45   | 2647  | 2655  | 2267  | 2559  | 2380  | 2383  | 2633  | 2982  | 2562  | 2393  | 2283  | 2241  | 2053  | 2382  | 2759  | 2281  | 2406  | 2424  | 2484  | 2777  | 2675  | 2518  | 2640  | 2344  | 2504  | 2178  | 2156  | 2493  | Vps45   |
| Vps4a   | 5860  | 6110  | 5982  | 6134  | 5954  | 5417  | 6353  | 6075  | 5564  | 5667  | 5337  | 5389  | 4927  | 5964  | 6070  | 5374  | 5838  | 6015  | 6196  | 5990  | 6321  | 6139  | 5385  | 5855  | 6294  | 5771  | 5341  | 5921  | Vps4a   |
| Vps4b   | 7922  | 6645  | 6602  | 5797  | 5831  | 6113  | 6849  | 6559  | 5952  | 4995  | 5267  | 5957  | 5790  | 6295  | 8099  | 7132  | 6191  | 5951  | 5814  | 7191  | 6547  | 5197  | 5966  | 5465  | 5262  | 6097  | 5935  | 6179  | Vps4b   |
| Vps50   | 5878  | 5267  | 3557  | 5418  | 5778  | 6002  | 6455  | 6110  | 4987  | 4429  | 4456  | 4934  | 4639  | 5305  | 6852  | 5428  | 5446  | 5202  | 5675  | 6820  | 6079  | 5078  | 4849  | 4552  | 5220  | 4975  | 506   |       |         |

|        |       |       |       |       |       |       |       |       |       |       |       |       |       |       |       |       |       |       |       |       |       |       |       |       |       |        |       |        |        |
|--------|-------|-------|-------|-------|-------|-------|-------|-------|-------|-------|-------|-------|-------|-------|-------|-------|-------|-------|-------|-------|-------|-------|-------|-------|-------|--------|-------|--------|--------|
| Vti1a  | 1747  | 1757  | 1795  | 1591  | 1834  | 1742  | 1817  | 2501  | 2277  | 2489  | 2159  | 2208  | 2344  | 2402  | 1705  | 1476  | 1691  | 1640  | 1811  | 1918  | 1808  | 2403  | 2289  | 2352  | 2410  | 2312   | 2529  | 2622   | Vti1a  |
| Vti1b  | 3419  | 3415  | 3290  | 3346  | 3239  | 3042  | 3622  | 4140  | 3715  | 3831  | 3538  | 3164  | 3280  | 3725  | 3749  | 3207  | 3465  | 3374  | 3251  | 3783  | 3474  | 3813  | 3710  | 3814  | 3771  | 3595   | 3232  | 3507   | Vti1b  |
| Vtn    | 1971  | 3078  | 3528  | 2897  | 3584  | 3061  | 2642  | 2677  | 2656  | 3024  | 2862  | 2937  | 4280  | 2805  | 3133  | 3306  | 2980  | 3078  | 3097  | 4438  | 3042  | 2896  | 3480  | 2688  | 3051  | 3222   | 3526  | 2987   | Vtn    |
| Vwa1   | 774   | 898   | 919   | 923   | 1051  | 1042  | 803   | 916   | 1106  | 1211  | 1175  | 1089  | 1069  | 897   | 704   | 814   | 921   | 890   | 1117  | 1015  | 906   | 1143  | 1190  | 1191  | 1108  | 1089   | 1052  | 946    | Vwa1   |
| Vwa2   | 218   | 164   | 82    | 88    | 101   | 119   | 54    | 193   | 361   | 223   | 279   | 126   | 214   | 120   | 127   | 199   | 85    | 160   | 58    | 40    | 50    | 99    | 317   | 178   | 105   | 259    | 106   | 148    | Vwa2   |
| Vwa3a  | 166   | 178   | 85    | 144   | 226   | 259   | 169   | 205   | 273   | 233   | 146   | 230   | 274   | 151   | 164   | 259   | 107   | 189   | 187   | 238   | 201   | 206   | 394   | 150   | 176   | 82     | 139   | 122    | Vwa3a  |
| Vwa3b  | 76    | 54    | 39    | 89    | 50    | 61    | 76    | 51    | 71    | 34    | 45    | 26    | 58    | 29    | 58    | 74    | 29    | 57    | 48    | 71    | 82    | 60    | 95    | 57    | 30    | 31     | 22    | 19     | Vwa3b  |
| Vwa5a  | 2414  | 1767  | 1439  | 1127  | 1341  | 1416  | 1059  | 1783  | 1972  | 1426  | 1958  | 1288  | 1723  | 1245  | 2106  | 2298  | 1227  | 1436  | 1084  | 1454  | 997   | 1542  | 2647  | 1275  | 1213  | 1253   | 1416  | 1477   | Vwa5a  |
| Vwa5b1 | 87    | 140   | 54    | 104   | 253   | 186   | 131   | 171   | 272   | 243   | 238   | 247   | 312   | 149   | 99    | 201   | 71    | 152   | 168   | 197   | 172   | 366   | 357   | 148   | 306   | 107    | 156   | 136    | Vwa5b1 |
| Vwa5b2 | 532   | 595   | 601   | 893   | 1597  | 956   | 742   | 876   | 562   | 1162  | 1103  | 660   | 1080  | 581   | 671   | 723   | 852   | 966   | 1052  | 924   | 842   | 1482  | 818   | 765   | 1001  | 358    | 667   | 606    | Vwa5b2 |
| Vwa7   | 145   | 209   | 227   | 313   | 234   | 190   | 244   | 62    | 59    | 134   | 92    | 109   | 102   | 65    | 131   | 225   | 326   | 366   | 280   | 195   | 213   | 105   | 91    | 111   | 102   | 58     | 87    | 114    | Vwa7   |
| Vwa8   | 1711  | 1612  | 1379  | 1242  | 1263  | 1405  | 1120  | 2022  | 2292  | 1966  | 2115  | 1903  | 2123  | 1918  | 1514  | 1798  | 1181  | 1150  | 1146  | 1209  | 1222  | 1818  | 2217  | 1835  | 1925  | 1606   | 1961  | 1892   | Vwa8   |
| Vwc2   | 119   | 128   | 119   | 90    | 223   | 194   | 208   | 315   | 274   | 319   | 363   | 203   | 162   | 219   | 138   | 95    | 139   | 144   | 166   | 211   | 213   | 401   | 343   | 248   | 372   | 161    | 165   | 173    | Vwc2   |
| Vwc2l  | 91    | 99    | 59    | 120   | 342   | 241   | 198   | 519   | 448   | 440   | 359   | 163   | 265   | 154   | 170   | 145   | 115   | 153   | 243   | 252   | 258   | 525   | 397   | 199   | 430   | 85     | 205   | 151    | Vwc2l  |
| Vwce   | 76    | 50    | 47    | 43    | 43    | 71    | 56    | 85    | 129   | 113   | 162   | 117   | 115   | 69    | 26    | 71    | 60    | 44    | 65    | 24    | 51    | 94    | 146   | 96    | 120   | 90     | 65    | 49     | Vwce   |
| Vwde   | 24    | 10    | 2     | 13    | 19    | 8     | 11    | 23    | 26    | 9     | 19    | 0     | 7     | 7     | 8     | 14    | 3     | 10    | 10    | 12    | 16    | 12    | 27    | 3     | 9     | 19     | 3     | 7      | Vwde   |
| Vwf    | 1498  | 1973  | 2638  | 2226  | 1810  | 2074  | 1373  | 895   | 1737  | 2131  | 2306  | 2840  | 2993  | 2826  | 1805  | 2160  | 2532  | 2479  | 1669  | 1358  | 1566  | 3019  | 2333  | 2546  | 2858  | 2354   | 3276  | 3093   | Vwf    |
| Vxn    | 308   | 384   | 319   | 434   | 794   | 644   | 472   | 2288  | 1670  | 2023  | 1564  | 1701  | 2903  | 1536  | 675   | 500   | 513   | 528   | 538   | 646   | 607   | 2513  | 1620  | 1387  | 1971  | 691    | 1715  | 1435   | Vxn    |
| Wac    | 9866  | 8827  | 9264  | 9351  | 9917  | 9546  | 10782 | 14760 | 11994 | 12330 | 11616 | 13221 | 12452 | 13889 | 10433 | 8173  | 9396  | 9097  | 10006 | 10122 | 10114 | 14105 | 11909 | 12594 | 13180 | 13845  | 13389 | 14030  | Wac    |
| Wapl   | 14910 | 11573 | 12940 | 12869 | 11607 | 13169 | 13508 | 12454 | 10434 | 10000 | 10458 | 12400 | 12039 | 12934 | 14660 | 13120 | 12193 | 11994 | 11976 | 13224 | 12605 | 9748  | 10321 | 10802 | 10390 | 111024 | 13123 | 13082  | Wapl   |
| Wars   | 6436  | 8243  | 8096  | 7518  | 6505  | 6384  | 6315  | 4570  | 5201  | 5587  | 5002  | 6982  | 5954  | 6396  | 6057  | 6591  | 7742  | 6728  | 7118  | 5535  | 6826  | 5105  | 5034  | 5803  | 5928  | 6880   | 6172  | 6713   | Wars   |
| Wars2  | 487   | 421   | 384   | 366   | 335   | 418   | 282   | 1133  | 1208  | 991   | 1158  | 1094  | 1083  | 1115  | 448   | 469   | 356   | 362   | 302   | 332   | 325   | 993   | 1192  | 1064  | 903   | 883    | 1128  | 1117   | Wars2  |
| Was    | 43    | 46    | 43    | 37    | 34    | 29    | 36    | 68    | 73    | 79    | 83    | 41    | 90    | 51    | 34    | 69    | 53    | 63    | 34    | 30    | 28    | 60    | 100   | 77    | 64    | 80     | 73    | 62     | Was    |
| Wasf1  | 4460  | 4717  | 6896  | 7806  | 7889  | 6488  | 7214  | 4551  | 4184  | 5981  | 5179  | 6391  | 4942  | 6283  | 4675  | 4586  | 7363  | 7439  | 7822  | 5142  | 8102  | 7392  | 4103  | 6195  | 6523  | 5648   | 4861  | 6258   | Wasf1  |
| Wasf2  | 4547  | 4276  | 5428  | 4295  | 3580  | 3623  | 3609  | 4196  | 5497  | 5260  | 6255  | 4941  | 5439  | 4759  | 3790  | 4952  | 4605  | 4164  | 3819  | 2982  | 3548  | 4273  | 5579  | 5605  | 4516  | 6441   | 4393  | 4739   | Wasf2  |
| Wasf3  | 5971  | 6362  | 8546  | 8678  | 8430  | 7740  | 7479  | 4217  | 4176  | 4668  | 4727  | 5096  | 4947  | 4847  | 6204  | 6835  | 8485  | 8253  | 8306  | 6744  | 7599  | 5249  | 3818  | 4570  | 5079  | 4279   | 4764  | 4904   | Wasf3  |
| Washc1 | 2712  | 3594  | 2891  | 3664  | 3409  | 3001  | 3022  | 2214  | 2673  | 2622  | 2633  | 2682  | 2414  | 2500  | 2695  | 3114  | 3447  | 3684  | 3490  | 3011  | 3174  | 2675  | 2503  | 2819  | 2640  | 2794   | 2542  | 2546   | Washc1 |
| Washc2 | 9056  | 9048  | 7958  | 8138  | 8420  | 8502  | 9219  | 8587  | 7899  | 7898  | 8135  | 8081  | 8411  | 8715  | 9476  | 9108  | 8398  | 8318  | 8210  | 8474  | 8825  | 8485  | 7883  | 7589  | 8011  | 6574   | 8237  | 8246   | Washc2 |
| Washc3 | 391   | 365   | 346   | 300   | 306   | 317   | 332   | 1036  | 962   | 843   | 992   | 899   | 844   | 1020  | 426   | 382   | 397   | 340   | 341   | 342   | 884   | 1040  | 936   | 906   | 1029  | 877    | 980   | Washc3 |        |
| Washc4 | 7093  | 5575  | 4683  | 6021  | 5539  | 6532  | 6279  | 7900  | 6058  | 5212  | 6296  | 5603  | 5887  | 5860  | 7183  | 6855  | 5251  | 5562  | 5036  | 6145  | 6148  | 5549  | 6227  | 4817  | 5406  | 4131   | 5625  | 5207   | Washc4 |
| Washc5 | 8449  | 8557  | 6854  | 6459  | 6452  | 6764  | 6993  | 7220  | 7164  | 6522  | 6409  | 7382  | 6792  | 7465  | 8144  | 8224  | 6831  | 6697  | 6095  | 7174  | 6870  | 6122  | 6753  | 6151  | 6629  | 6850   | 7471  | 7351   | Washc5 |
| Wasl   | 6413  | 5205  | 7309  | 7262  | 6910  | 7057  | 7350  | 5715  | 5015  | 5575  | 5812  | 6114  | 5435  | 6382  | 6231  | 6368  | 6946  | 7451  | 6807  | 5428  | 7237  | 6709  | 5145  | 5859  | 6066  | 6541   | 5774  | 6113   | Wasl   |
| Wbp1   | 7121  | 9352  | 7733  | 8867  | 7330  | 7469  | 7695  | 7220  | 7317  | 7530  | 6421  | 8218  | 7428  | 7800  | 7444  | 7540  | 8763  | 7657  | 8500  | 7916  | 7986  | 6562  | 7048  | 7816  | 7519  | 9034   | 8724  | 7817   | Wbp1   |
| Wbp1l  | 6339  | 6517  | 9339  | 7761  | 6411  | 6087  | 6329  | 6174  | 6709  | 8119  | 7446  | 9624  | 7905  | 9111  | 5869  | 6340  | 8247  | 6825  | 7129  | 5309  | 6528  | 7319  | 6405  | 8773  | 7723  | 11507  | 8012  | 9596   | Wbp1l  |
| Wbp1l  | 5944  | 7126  | 7986  | 7611  | 6723  | 6548  | 5719  | 3634  | 4696  | 5081  | 5200  | 5718  | 5214  | 4749  | 5658  | 7009  | 7559  | 7469  | 7141  | 5235  | 6019  | 5116  | 4772  | 5523  | 5379  | 5830   | 5127  | 5184   | Wbp1l  |
| Wbp2   | 1361  | 1611  | 1815  | 1943  | 2712  | 2034  | 2344  | 3555  | 4027  | 5209  | 4486  | 5277  | 4381  | 5235  | 1523  | 1544  | 2117  | 2358  | 2683  | 1767  | 2277  | 5259  | 4062  | 5520  | 5506  | 5329   | 4013  | 5064   | Wbp2   |
| Wbp2nl | 7     | 10    | 5     | 22    | 5     | 7     | 8     | 2     | 4     | 3     | 4     | 14    | 9     | 6     | 17    | 14    | 10    | 2     | 5     | 7     | 10    | 8     | 3     | 5     | 2     | 9      | 12    | 5      | Wbp2nl |
| Wbp4   | 5313  | 5014  | 5830  | 5602  | 5574  | 5414  | 5869  | 4846  | 4169  | 4626  | 4286  | 4680  | 4500  | 4849  | 5608  | 4945  | 5611  | 5465  | 5624  | 5669  | 5718  | 4547  | 4196  | 4645  | 4494  | 5007   | 4690  | 4864   | Wbp4   |
| Wdcp   | 2640  | 3245  | 2703  | 3160  | 2563  | 2500  | 2710  | 1237  | 1130  | 1210  | 1253  | 1253  | 1200  | 1286  | 2521  | 2850  | 3311  | 3099  | 2722  | 2479  | 2851  | 1056  | 1111  | 1267  | 1282  | 1343   | 1290  | 1351   | Wdcp   |
| Wdfy1  | 2215  | 1901  | 1902  | 2621  | 2822  | 2752  | 2807  | 2402  | 2151  | 2432  | 2505  | 2292  | 2248  | 2330  | 2291  | 1805  | 2396  | 2511  | 2513  | 2435  | 2796  | 3090  | 2243  | 2265  | 2669  | 2173   | 2206  | 2256   | Wdfy1  |
| Wdfy2  | 8877  | 8115  | 6721  | 7229  | 6703  | 7354  | 7253  | 4110  | 3749  | 3698  | 3586  | 3993  | 3730  | 3775  | 8401  | 8006  | 6901  | 7394  | 6685  | 6880  | 7324  | 3746  | 3848  | 3676  | 3905  | 3477   | 4058  | 3891   | Wdfy2  |
| Wdfy3  | 6717  | 7196  | 5106  | 7641  | 11254 | 10189 | 9270  | 14377 | 15777 | 18299 | 17937 | 16789 | 17503 | 17239 | 6852  | 7608  | 5975  | 8403  | 6955  | 8014  | 10460 | 15224 | 14544 | 13688 | 20401 | 9852   | 17331 | 15276  | Wdfy3  |
| Wdfy4  | 122   | 144   | 127   | 107   | 66    | 137   | 79    | 120   | 187   | 139   | 211   | 89    | 141   | 103   | 136   | 150   | 74    | 122   | 90    | 107   | 88    | 104   | 234   | 119   | 183   | 90     | 141   | 110    | Wdfy4  |
| Wdhd1  | 9090  | 7464  | 7862  | 6608  | 6065  | 6927  | 7082  | 5931  | 5141  | 4724  | 4695  | 6806  | 6090  | 6684  | 7950  | 7956  | 7194  | 6291  | 6446  | 7538  | 6608  | 4117  | 4599  | 5501  | 5113  | 6837   | 6960  | 7011   | Wdhd1  |
| Wdpcp  | 1093  | 1056  | 965   | 875   | 676   | 797   | 870   | 960   | 857   | 673   | 769   | 919   | 839   | 834   | 1094  | 985   | 840   | 735   | 847   | 964   | 830   | 795   | 863   | 764   | 741   | 843    | 922   | 949    | Wdpcp  |
| Wdr1   | 12335 | 12346 | 10944 | 10238 | 10194 | 10327 | 9735  | 9967  | 10752 | 9494  | 10223 | 9267  | 10356 | 9257  | 11802 | 12063 | 10347 | 10705 | 10318 | 10225 | 9954  | 9499  | 11021 | 9591  | 9375  | 10413  | 10133 | 9647   | Wdr1   |
| Wdr11  | 3839  | 3317  | 3113  | 2964  | 3257  | 3553  | 3176  | 6356  | 6295  | 5638  | 6108  | 5993  | 5757  | 5865  | 3687  | 3446  | 2933  | 2945  | 3038  | 3320  | 3097  | 5633  | 6300  | 5738  | 5778  | 5484   | 6140  | 5879   | Wdr11  |
| Wdr12  | 6434  | 6255  | 5349  | 5987  | 5285  | 5780  | 6488  | 3753  | 3098  | 2913  |       |       |       |       |       |       |       |       |       |       |       |       |       |       |       |        |       |        |        |

|         |       |       |       |       |       |       |       |       |       |       |       |       |       |       |       |       |       |       |       |       |        |       |       |       |       |       |       |       |         |         |
|---------|-------|-------|-------|-------|-------|-------|-------|-------|-------|-------|-------|-------|-------|-------|-------|-------|-------|-------|-------|-------|--------|-------|-------|-------|-------|-------|-------|-------|---------|---------|
| Wdr59   | 2467  | 2562  | 2203  | 2339  | 2588  | 2499  | 2417  | 2395  | 2530  | 2405  | 2425  | 2159  | 2352  | 2072  | 2304  | 2210  | 2389  | 2561  | 2489  | 2368  | 2439   | 2567  | 2370  | 2251  | 2449  | 2106  | 2258  | 2174  | Wdr59   |         |
| Wdr5b   | 869   | 706   | 749   | 723   | 830   | 758   | 872   | 1138  | 1046  | 991   | 908   | 1138  | 997   | 1135  | 831   | 626   | 771   | 770   | 861   | 912   | 769    | 989   | 990   | 1008  | 1031  | 1185  | 1124  | 1046  | Wdr5b   |         |
| Wdr6    | 19295 | 23894 | 24900 | 28027 | 30703 | 28749 | 24370 | 24099 | 28599 | 30742 | 28440 | 37518 | 32488 | 30843 | 19372 | 21107 | 28126 | 28030 | 31910 | 25002 | 26879  | 34228 | 27575 | 33698 | 35350 | 37493 | 33755 | 31495 | Wdr6    |         |
| Wdr61   | 4786  | 4636  | 4909  | 4122  | 3746  | 3750  | 3989  | 3583  | 3353  | 2943  | 3038  | 3674  | 3433  | 3615  | 4770  | 4911  | 4584  | 3913  | 3796  | 4631  | 3719   | 2941  | 3416  | 3475  | 3180  | 4164  | 3885  | 3832  | Wdr61   |         |
| Wdr62   | 2813  | 3512  | 3408  | 3333  | 2334  | 2503  | 2851  | 819   | 1131  | 1055  | 1032  | 1272  | 1981  | 1475  | 1622  | 2451  | 3175  | 3388  | 3250  | 3020  | 2238   | 2672  | 994   | 990   | 1385  | 1290  | 1834  | 1572  | 1618    | Wdr62   |
| Wdr64   | 0     | 0     | 0     | 3     | 0     | 0     | 0     | 2     | 2     | 1     | 0     | 2     | 2     | 3     | 0     | 1     | 1     | 0     | 0     | 1     | 3      | 3     | 5     | 2     | 2     | 0     | 0     | 0     | 6       | Wdr64   |
| Wdr66   | 336   | 331   | 187   | 76    | 356   | 293   | 322   | 249   | 290   | 332   | 226   | 211   | 347   | 192   | 311   | 419   | 298   | 377   | 344   | 309   | 370    | 247   | 305   | 335   | 196   | 313   | 174   | 150   | Wdr66   |         |
| Wdr7    | 6033  | 5977  | 4783  | 7085  | 8627  | 7996  | 7965  | 6405  | 6387  | 7014  | 5958  | 5912  | 5574  | 6066  | 7046  | 6012  | 6249  | 7554  | 7511  | 7099  | 8315   | 7817  | 6055  | 5761  | 7454  | 3682  | 5781  | 5569  | Wdr7    |         |
| Wdr70   | 4082  | 4311  | 4210  | 3739  | 2929  | 3196  | 3117  | 2882  | 2725  | 2605  | 2640  | 3144  | 2872  | 2917  | 4068  | 3794  | 3923  | 3406  | 3316  | 3476  | 3126   | 2680  | 2720  | 2924  | 2828  | 3448  | 3149  | 3152  | Wdr70   |         |
| Wdr72   | 32    | 54    | 57    | 43    | 59    | 18    | 42    | 55    | 66    | 76    | 30    | 35    | 54    | 26    | 86    | 68    | 24    | 21    | 35    | 49    | 26     | 69    | 82    | 20    | 17    | 34    | 42    | 28    | Wdr72   |         |
| Wdr73   | 2135  | 2337  | 2218  | 2203  | 2047  | 2261  | 2061  | 2656  | 2632  | 2690  | 2397  | 3053  | 2946  | 2750  | 2081  | 2160  | 2427  | 2224  | 2240  | 2251  | 2069   | 2401  | 2472  | 2806  | 2873  | 3144  | 3001  | 3023  | Wdr73   |         |
| Wdr74   | 2135  | 2417  | 2033  | 2125  | 1892  | 1959  | 2044  | 1910  | 2063  | 2052  | 2003  | 2164  | 2007  | 2126  | 2168  | 2102  | 2160  | 2105  | 2164  | 2042  | 2074   | 1699  | 1998  | 2116  | 2066  | 2409  | 2238  | 2181  | Wdr74   |         |
| Wdr75   | 6719  | 6167  | 5343  | 5863  | 4856  | 5164  | 5721  | 5678  | 5327  | 4513  | 4491  | 5238  | 5330  | 5692  | 6821  | 6037  | 5302  | 5304  | 5045  | 6400  | 5474   | 4562  | 4873  | 4788  | 4868  | 5819  | 5613  | 5802  | Wdr75   |         |
| Wdr76   | 3177  | 2938  | 3857  | 2847  | 2293  | 2597  | 3124  | 2757  | 2241  | 2276  | 2130  | 3783  | 3020  | 3904  | 3101  | 2717  | 2997  | 2589  | 2909  | 3107  | 2845   | 1918  | 2036  | 2826  | 2634  | 4101  | 3876  | 4150  | Wdr76   |         |
| Wdr77   | 5885  | 4743  | 5323  | 5227  | 4822  | 5222  | 5984  | 4913  | 3987  | 4125  | 4178  | 4882  | 4623  | 5152  | 5987  | 4918  | 4715  | 5028  | 5121  | 4909  | 5690   | 4791  | 4032  | 4418  | 4670  | 5104  | 4702  | 5295  | Wdr77   |         |
| Wdr81   | 2127  | 2905  | 2949  | 3378  | 3066  | 2749  | 2461  | 1613  | 2046  | 2359  | 2298  | 2232  | 2036  | 1916  | 1991  | 2558  | 3206  | 3354  | 3126  | 2053  | 2800   | 2267  | 2130  | 2402  | 2410  | 1698  | 1916  | 2003  | Wdr81   |         |
| Wdr82   | 17762 | 16394 | 15316 | 16729 | 16283 | 16659 | 17325 | 22319 | 19144 | 18316 | 17194 | 19670 | 16689 | 19656 | 17884 | 14438 | 16223 | 16463 | 17115 | 17718 | 17288  | 21250 | 18183 | 18968 | 20625 | 19732 | 19205 | 19409 | Wdr82   |         |
| Wdr83   | 1834  | 2116  | 2194  | 2119  | 1919  | 2025  | 1915  | 2056  | 2174  | 2175  | 2159  | 2424  | 2327  | 2325  | 1768  | 1836  | 2060  | 1915  | 2295  | 2103  | 1817   | 20759 | 2011  | 2622  | 2348  | 2479  | 2651  | 2436  | Wdr83   |         |
| Wdr83os | 1799  | 2144  | 1964  | 1912  | 1799  | 1865  | 2119  | 1762  | 1907  | 1724  | 1830  | 2101  | 2057  | 2172  | 1721  | 1752  | 1820  | 2147  | 2022  | 1940  | 2017   | 1756  | 1840  | 1881  | 1905  | 2502  | 2231  | 2290  | Wdr83os |         |
| Wdr86   | 1930  | 1557  | 1208  | 923   | 752   | 853   | 434   | 1533  | 1826  | 1316  | 1358  | 1010  | 1386  | 752   | 1292  | 2163  | 926   | 922   | 521   | 599   | 416    | 790   | 1827  | 1347  | 648   | 1621  | 1092  | 819   | Wdr86   |         |
| Wdr88   | 0     | 3     | 0     | 0     | 0     | 0     | 0     | 2     | 2     | 0     | 3     | 0     | 0     | 2     | 1     | 2     | 0     | 0     | 1     | 4     | 1      | 0     | 1     | 0     | 0     | 0     | 0     | 0     | 1       | Wdr88   |
| Wdr89   | 247   | 238   | 294   | 213   | 172   | 255   | 228   | 276   | 304   | 287   | 348   | 331   | 348   | 329   | 239   | 245   | 247   | 191   | 222   | 166   | 211    | 247   | 295   | 351   | 314   | 463   | 310   | 352   | Wdr89   |         |
| Wdr90   | 4367  | 5401  | 5263  | 5821  | 4564  | 4762  | 4500  | 2854  | 3623  | 3826  | 3496  | 5409  | 4434  | 4118  | 3982  | 5052  | 5786  | 5359  | 5542  | 4295  | 4261   | 3367  | 3423  | 4433  | 3962  | 4102  | 4602  | 4430  | Wdr90   |         |
| Wdr91   | 1967  | 2611  | 2267  | 2126  | 2017  | 1880  | 1838  | 1310  | 1543  | 1729  | 1584  | 1691  | 1721  | 1530  | 1908  | 2272  | 2158  | 2259  | 2131  | 1794  | 1849   | 1651  | 1453  | 1561  | 1619  | 1676  | 1539  | 1594  | Wdr91   |         |
| Wdr92   | 1977  | 1881  | 2053  | 1661  | 1339  | 1546  | 1514  | 1661  | 1580  | 1351  | 1365  | 1435  | 1408  | 1498  | 1878  | 2053  | 1730  | 1614  | 1474  | 1821  | 1413   | 1290  | 1568  | 1507  | 1427  | 1568  | 1635  | 1585  | Wdr92   |         |
| Wdr93   | 24    | 38    | 10    | 28    | 52    | 33    | 27    | 34    | 50    | 16    | 30    | 25    | 58    | 26    | 24    | 47    | 23    | 35    | 31    | 49    | 34     | 38    | 67    | 37    | 35    | 29    | 45    | 46    | Wdr93   |         |
| Wdr95   | 25    | 35    | 11    | 35    | 52    | 60    | 38    | 21    | 33    | 55    | 46    | 51    | 40    | 38    | 20    | 14    | 36    | 36    | 35    | 40    | 38     | 43    | 39    | 32    | 42    | 30    | 27    | 46    | Wdr95   |         |
| Wdsusb1 | 1207  | 1084  | 1246  | 917   | 912   | 840   | 894   | 852   | 895   | 805   | 942   | 822   | 873   | 691   | 1056  | 1119  | 880   | 930   | 893   | 1018  | 877    | 655   | 1058  | 829   | 626   | 904   | 809   | 833   | Wdsusb1 |         |
| Wd1c1   | 5182  | 6869  | 7090  | 7191  | 7139  | 6304  | 6231  | 3695  | 4333  | 4893  | 4208  | 4655  | 4549  | 4312  | 5095  | 6156  | 7740  | 7156  | 7758  | 5674  | 6795   | 4503  | 3979  | 4859  | 4746  | 4814  | 4303  | 4149  | Wd1c1   |         |
| Wee1    | 3796  | 3334  | 4428  | 3639  | 2857  | 2873  | 3452  | 2965  | 2949  | 2637  | 2807  | 4233  | 3382  | 3985  | 3281  | 3267  | 3654  | 3210  | 3500  | 2860  | 3191   | 2460  | 2712  | 3427  | 2819  | 4859  | 3811  | 4303  | Wee1    |         |
| Wee2    | 10    | 13    | 10    | 22    | 27    | 6     | 20    | 11    | 21    | 25    | 6     | 12    | 17    | 12    | 16    | 13    | 12    | 31    | 23    | 17    | 22     | 12    | 25    | 11    | 28    | 14    | 30    | 7     | Wee2    |         |
| Wf1c1   | 22    | 35    | 41    | 39    | 24    | 37    | 28    | 34    | 36    | 35    | 37    | 39    | 36    | 30    | 37    | 37    | 31    | 30    | 34    | 41    | 27     | 37    | 61    | 39    | 50    | 24    | 52    | 38    | Wf1c1   |         |
| Wf1c10  | 1     | 0     | 0     | 0     | 0     | 0     | 1     | 0     | 0     | 5     | 5     | 0     | 0     | 0     | 0     | 0     | 0     | 0     | 0     | 0     | 0      | 2     | 2     | 0     | 0     | 0     | 0     | 2     | Wf1c10  |         |
| Wf1c11  | 0     | 0     | 0     | 0     | 0     | 0     | 0     | 0     | 1     | 0     | 0     | 0     | 0     | 0     | 0     | 0     | 0     | 0     | 0     | 0     | 0      | 0     | 0     | 0     | 0     | 0     | 0     | 0     | 0       | Wf1c11  |
| Wf1c12  | 0     | 0     | 0     | 0     | 0     | 0     | 0     | 0     | 1     | 0     | 8     | 0     | 1     | 0     | 0     | 1     | 3     | 0     | 2     | 0     | 0      | 2     | 3     | 3     | 2     | 0     | 0     | 1     | Wf1c12  |         |
| Wf1c13  | 3     | 2     | 1     | 4     | 0     | 0     | 0     | 0     | 0     | 0     | 1     | 0     | 3     | 0     | 0     | 3     | 0     | 0     | 0     | 0     | 0      | 0     | 0     | 0     | 0     | 6     | 0     | 0     | 0       | Wf1c13  |
| Wf1c15a | 1     | 0     | 0     | 0     | 0     | 0     | 0     | 0     | 0     | 0     | 0     | 0     | 0     | 0     | 0     | 0     | 0     | 0     | 0     | 0     | 2      | 0     | 0     | 0     | 0     | 0     | 0     | 0     | 0       | Wf1c15a |
| Wf1c17  | 0     | 2     | 1     | 3     | 0     | 2     | 0     | 1     | 4     | 1     | 11    | 0     | 0     | 1     | 0     | 1     | 0     | 1     | 0     | 0     | 4      | 0     | 3     | 0     | 0     | 3     | 2     | 5     | Wf1c17  |         |
| Wf1c18  | 0     | 0     | 0     | 0     | 0     | 0     | 0     | 0     | 0     | 0     | 0     | 0     | 0     | 0     | 0     | 0     | 0     | 0     | 0     | 3     | 0      | 0     | 3     | 0     | 0     | 0     | 0     | 0     | 0       | Wf1c18  |
| Wf1c2   | 401   | 392   | 256   | 255   | 122   | 193   | 204   | 278   | 376   | 312   | 336   | 297   | 406   | 337   | 307   | 301   | 264   | 174   | 208   | 229   | 155    | 185   | 421   | 409   | 227   | 596   | 385   | 385   | Wf1c2   |         |
| Wf1c21  | 0     | 0     | 0     | 0     | 0     | 3     | 0     | 0     | 2     | 3     | 0     | 1     | 3     | 1     | 0     | 0     | 6     | 5     | 0     | 0     | 0      | 0     | 3     | 2     | 0     | 0     | 1     | 1     | Wf1c21  |         |
| Wf1c3   | 60    | 87    | 55    | 68    | 59    | 38    | 37    | 32    | 24    | 38    | 52    | 31    | 41    | 37    | 80    | 64    | 98    | 67    | 63    | 74    | 43     | 47    | 57    | 47    | 32    | 64    | 37    | 44    | Wf1c3   |         |
| Wf1c5   | 0     | 0     | 3     | 0     | 0     | 0     | 0     | 0     | 0     | 0     | 0     | 0     | 0     | 0     | 0     | 0     | 1     | 0     | 0     | 0     | 0      | 0     | 0     | 0     | 0     | 0     | 0     | 0     | 0       | Wf1c5   |
| Wf1c6a  | 0     | 0     | 0     | 0     | 1     | 0     | 0     | 1     | 0     | 0     | 0     | 0     | 0     | 0     | 0     | 0     | 0     | 0     | 0     | 0     | 0      | 2     | 0     | 0     | 3     | 0     | 0     | 0     | Wf1c6a  |         |
| Wf1c6b  | 0     | 0     | 0     | 3     | 0     | 0     | 0     | 0     | 0     | 0     | 0     | 0     | 0     | 0     | 0     | 2     | 0     | 0     | 0     | 0     | 0      | 0     | 0     | 0     | 2     | 0     | 0     | 0     | Wf1c6b  |         |
| Wf1c8   | 0     | 0     | 0     | 0     | 0     | 0     | 1     | 1     | 1     | 0     | 1     | 3     | 0     | 0     | 6     | 0     | 0     | 0     | 0     | 0     | 1      | 0     | 1     | 0     | 0     | 1     | 1     | 1     | Wf1c8   |         |
| Wf1kkn1 | 95    | 136   | 123   | 156   | 89    | 126   | 121   | 40    | 34    | 46    | 33    | 46    | 53    | 39    | 104   | 107   | 126   | 140   | 109   | 113   | 116    | 38    | 39    | 51    | 42    | 73    | 46    | 66    | Wf1kkn1 |         |
| Wf1kkn2 | 336   | 420   | 355   | 399   | 508   | 623   | 350   | 699   | 1043  | 932   | 1113  | 874   | 1008  | 573   | 306   | 490   | 338   | 426   | 387   | 413   | 481    | 924   | 1498  | 867   | 654   | 848   | 723   | 611   | Wf1kkn2 |         |
| Wfs1    | 1617  | 2003  | 1973  | 1982  | 1829  | 1654  | 1672  | 586   | 791   | 834   | 880   | 793   | 733   | 656   | 1545  | 1735  | 2135  | 2127  | 1922  | 1601  | 1756   | 690   | 873   | 817   | 678   | 1016  | 836   | 796   | Wfs1    |         |
| Whamm   | 946   | 1088  | 1091  | 1245  | 1119  | 1073  | 1121  | 675   | 714   | 803   | 714   | 690   | 712   | 707   | 940   | 960   | 1144  | 1185  | 1163  | 925   | 1086   | 692   | 671   | 735   | 845   | 780   | 588   | 665   | Whamm   |         |
| Whrn    | 3255  | 4637  | 4506  | 4982  | 5164  | 4917  | 4074  | 1403  | 1685  | 2028  | 1886  | 2387  | 1868  | 1800  | 3066  | 3802  | 5144  | 5133  | 5321  | 4087  | 4720</ |       |       |       |       |       |       |       |         |         |



|         |       |       |       |       |       |       |       |       |       |       |       |       |       |       |       |       |       |       |       |       |       |       |       |       |       |       |       |       |         |
|---------|-------|-------|-------|-------|-------|-------|-------|-------|-------|-------|-------|-------|-------|-------|-------|-------|-------|-------|-------|-------|-------|-------|-------|-------|-------|-------|-------|-------|---------|
| Wnt8b   | 1167  | 1056  | 2327  | 754   | 568   | 911   | 872   | 948   | 830   | 934   | 681   | 2700  | 1963  | 2489  | 1059  | 878   | 1313  | 616   | 885   | 1136  | 716   | 662   | 1048  | 1494  | 1159  | 3254  | 2868  | 3704  | Wnt8b   |
| Wnt9a   | 444   | 530   | 774   | 446   | 347   | 380   | 249   | 396   | 452   | 485   | 619   | 690   | 677   | 540   | 421   | 543   | 574   | 426   | 351   | 352   | 243   | 455   | 649   | 579   | 449   | 609   | 604   | 694   | Wnt9a   |
| Wnt9b   | 354   | 192   | 97    | 17    | 30    | 86    | 16    | 256   | 258   | 106   | 87    | 149   | 181   | 134   | 120   | 228   | 56    | 109   | 23    | 23    | 19    | 53    | 338   | 174   | 70    | 116   | 112   | 170   | Wnt9b   |
| Wrap53  | 2466  | 3275  | 2622  | 2724  | 2207  | 2000  | 2434  | 1342  | 1427  | 1314  | 1237  | 1616  | 1351  | 1550  | 2502  | 2674  | 2582  | 2532  | 2518  | 2405  | 2328  | 1248  | 1339  | 1415  | 1374  | 1731  | 1565  | 1565  | Wrap53  |
| Wrap73  | 1922  | 2553  | 2173  | 2150  | 1958  | 2040  | 2000  | 1408  | 1596  | 1594  | 1413  | 1663  | 1433  | 1438  | 1662  | 1981  | 2102  | 2106  | 2376  | 2041  | 2078  | 1415  | 1620  | 1638  | 1742  | 1963  | 1715  | 1637  | Wrap73  |
| Wrrn    | 2339  | 1885  | 1925  | 1717  | 1670  | 1911  | 1791  | 2141  | 2040  | 1701  | 2172  | 2067  | 2197  | 2105  | 2271  | 2322  | 1913  | 1680  | 1627  | 1763  | 1644  | 1669  | 2073  | 1825  | 1792  | 1607  | 2295  | 2023  | Wrrn    |
| Wrrnip1 | 3718  | 3676  | 3799  | 3999  | 4269  | 3707  | 3869  | 3149  | 3173  | 3138  | 3239  | 3125  | 2742  | 2950  | 3742  | 2322  | 4066  | 3987  | 4404  | 4092  | 4046  | 3374  | 3221  | 3444  | 3346  | 3298  | 2760  | 2963  | Wrrnip1 |
| Wsb1    | 28617 | 19098 | 22776 | 24432 | 23974 | 28134 | 29262 | 39892 | 34406 | 33404 | 36951 | 36177 | 37394 | 38886 | 30064 | 23855 | 23229 | 25757 | 23820 | 28437 | 27551 | 41540 | 34308 | 33424 | 36618 | 30822 | 36146 | 34539 | Wsb1    |
| Wsb2    | 6000  | 6938  | 6047  | 7281  | 8839  | 7415  | 7853  | 5606  | 5721  | 6505  | 5893  | 5718  | 5226  | 5305  | 6132  | 5841  | 7320  | 7947  | 8299  | 7058  | 8453  | 7364  | 5738  | 5652  | 6662  | 5141  | 4879  | 5260  | Wsb2    |
| Wscd1   | 2909  | 4247  | 3948  | 3822  | 4333  | 4011  | 3825  | 2928  | 2801  | 3407  | 2438  | 4574  | 3783  | 3886  | 3171  | 2931  | 4177  | 3747  | 4669  | 3972  | 3990  | 3217  | 3020  | 3530  | 3624  | 3336  | 4600  | 4594  | Wscd1   |
| Wscd2   | 488   | 716   | 844   | 775   | 789   | 824   | 619   | 734   | 872   | 1031  | 991   | 1121  | 1224  | 1018  | 570   | 664   | 811   | 733   | 806   | 660   | 662   | 1034  | 883   | 1072  | 985   | 927   | 1119  | 1162  | Wscd2   |
| Wt1     | 2     | 4     | 3     | 5     | 11    | 7     | 9     | 12    | 16    | 23    | 69    | 7     | 35    | 6     | 4     | 13    | 0     | 4     | 1     | 2     | 4     | 10    | 41    | 4     | 0     | 0     | 7     | 11    | Wt1     |
| Wtap    | 7762  | 6525  | 7391  | 7463  | 7586  | 7353  | 8468  | 10490 | 9208  | 8624  | 8753  | 9489  | 9507  | 10239 | 7863  | 6520  | 7158  | 6871  | 7690  | 8224  | 7981  | 9436  | 8903  | 9119  | 9577  | 10192 | 9910  | 10342 | Wtap    |
| Wtip    | 972   | 1040  | 1021  | 953   | 1064  | 893   | 827   | 1108  | 1352  | 1334  | 1419  | 1147  | 1226  | 1040  | 840   | 966   | 1022  | 983   | 1036  | 876   | 886   | 1073  | 1347  | 1302  | 1098  | 1299  | 1128  | 1108  | Wtip    |
| Wwc1    | 3913  | 4765  | 5795  | 5869  | 6177  | 5377  | 5292  | 3554  | 4223  | 4970  | 3777  | 4678  | 3931  | 4283  | 3953  | 4461  | 5895  | 5781  | 6340  | 4925  | 5675  | 3987  | 4202  | 5043  | 5166  | 4370  | 4124  | 4155  | Wwc1    |
| Wwc2    | 5777  | 5973  | 5670  | 5358  | 5285  | 5288  | 4932  | 3283  | 3755  | 3624  | 3953  | 3637  | 4289  | 3393  | 5488  | 6613  | 5464  | 5620  | 4930  | 4527  | 4883  | 3263  | 3873  | 3348  | 3063  | 3325  | 3635  | 3598  | Wwc2    |
| Wwox    | 963   | 879   | 1011  | 1017  | 966   | 927   | 904   | 626   | 643   | 701   | 679   | 782   | 793   | 843   | 901   | 945   | 1014  | 843   | 968   | 872   | 995   | 739   | 652   | 772   | 710   | 895   | 715   | 826   | Wwox    |
| Wwp1    | 6685  | 4707  | 3926  | 4253  | 4709  | 5430  | 5214  | 5548  | 4856  | 3716  | 4474  | 4351  | 4688  | 4431  | 6564  | 5861  | 3809  | 4260  | 4230  | 5589  | 4941  | 4182  | 5166  | 3479  | 3919  | 3251  | 4642  | 4349  | Wwp1    |
| Wwp2    | 4362  | 4926  | 4070  | 4720  | 3814  | 4738  | 3446  | 7184  | 12424 | 14309 | 15326 | 6542  | 7404  | 5910  | 4094  | 4454  | 4071  | 4086  | 4408  | 3795  | 3952  | 11114 | 9027  | 10105 | 7809  | 9842  | 6653  | 6080  | Wwp2    |
| Wwtr1   | 7680  | 6180  | 6703  | 5680  | 5330  | 5875  | 5496  | 4595  | 4965  | 4230  | 5518  | 4649  | 4801  | 4817  | 7392  | 7309  | 6036  | 6034  | 5389  | 5014  | 5543  | 4069  | 5712  | 4595  | 4381  | 4908  | 4761  | 4828  | Wwtr1   |
| Xab2    | 4654  | 6056  | 5135  | 5049  | 4032  | 4568  | 4223  | 3378  | 4095  | 3907  | 3373  | 4347  | 3941  | 3920  | 4396  | 4972  | 4904  | 4622  | 4934  | 4276  | 4377  | 3302  | 3845  | 4163  | 3887  | 4749  | 4435  | 4027  | Xab2    |
| Xaf1    | 14    | 13    | 24    | 15    | 30    | 22    | 20    | 29    | 31    | 96    | 94    | 50    | 49    | 66    | 20    | 15    | 10    | 8     | 13    | 56    | 38    | 89    | 87    | 79    | 59    | 67    | 70    | 71    | Xaf1    |
| Xbp1    | 4693  | 4661  | 5299  | 4302  | 4230  | 4208  | 4312  | 5305  | 5041  | 4692  | 5493  | 3879  | 4225  | 3774  | 4447  | 4620  | 4715  | 4376  | 4826  | 4254  | 4026  | 5212  | 5491  | 4966  | 4758  | 4545  | 3842  | 4400  | Xbp1    |
| Xcd1    | 0     | 0     | 0     | 0     | 0     | 0     | 0     | 0     | 0     | 0     | 0     | 0     | 0     | 0     | 0     | 1     | 0     | 0     | 0     | 0     | 0     | 0     | 0     | 0     | 0     | 0     | 0     | 0     | Xcd1    |
| Xdh     | 13    | 6     | 4     | 20    | 17    | 17    | 15    | 2     | 22    | 13    | 60    | 2     | 18    | 7     | 11    | 5     | 12    | 23    | 21    | 4     | 6     | 8     | 33    | 5     | 14    | 8     | 12    | 8     | Xdh     |
| Xiap    | 5880  | 3869  | 4917  | 5260  | 6325  | 6471  | 6549  | 11535 | 10495 | 10264 | 11315 | 11615 | 11522 | 12311 | 5772  | 4886  | 5193  | 5271  | 5945  | 5700  | 6128  | 11075 | 10331 | 10502 | 10687 | 9421  | 12007 | 11354 | Xiap    |
| Xirp1   | 0     | 0     | 0     | 2     | 0     | 0     | 0     | 9     | 23    | 8     | 193   | 1     | 8     | 0     | 1     | 4     | 0     | 0     | 5     | 0     | 1     | 18    | 129   | 2     | 9     | 4     | 0     | 4     | Xirp1   |
| Xirp2   | 0     | 1     | 0     | 0     | 1     | 0     | 0     | 5     | 2     | 0     | 0     | 0     | 1     | 0     | 7     | 2     | 0     | 0     | 0     | 0     | 1     | 3     | 5     | 0     | 1     | 0     | 0     | 0     | Xirp2   |
| Xk      | 810   | 696   | 648   | 721   | 946   | 839   | 1041  | 818   | 714   | 770   | 546   | 816   | 1192  | 954   | 785   | 664   | 666   | 900   | 893   | 1079  | 958   | 772   | 645   | 623   | 640   | 754   | 779   | 1151  | Xk      |
| Xkr4    | 967   | 931   | 107   | 542   | 947   | 1435  | 1121  | 2440  | 2104  | 1153  | 1261  | 791   | 1066  | 950   | 1296  | 934   | 205   | 474   | 508   | 1498  | 1514  | 692   | 1715  | 363   | 1458  | 160   | 1144  | 655   | Xkr4    |
| Xkr5    | 164   | 153   | 166   | 100   | 85    | 95    | 73    | 264   | 391   | 312   | 354   | 500   | 448   | 403   | 111   | 161   | 127   | 70    | 83    | 110   | 84    | 229   | 297   | 315   | 240   | 579   | 481   | 406   | Xkr5    |
| Xkr6    | 1916  | 1666  | 2067  | 1991  | 1887  | 1877  | 2001  | 1657  | 1360  | 1793  | 1501  | 1893  | 1809  | 1820  | 1791  | 1604  | 1961  | 1822  | 1905  | 1664  | 1844  | 1910  | 1272  | 1705  | 1799  | 1777  | 1764  | 1900  | Xkr6    |
| Xkr7    | 637   | 879   | 1087  | 1490  | 1820  | 1332  | 2021  | 977   | 1121  | 1480  | 1198  | 1067  | 1091  | 943   | 791   | 692   | 1294  | 1442  | 1652  | 1195  | 1567  | 1343  | 926   | 1297  | 1668  | 425   | 977   | 903   | Xkr7    |
| Xkr8    | 837   | 969   | 755   | 759   | 697   | 755   | 627   | 536   | 539   | 485   | 578   | 472   | 482   | 506   | 845   | 924   | 768   | 757   | 647   | 791   | 693   | 481   | 562   | 507   | 510   | 521   | 560   | 522   | Xkr8    |
| Xkr9    | 6     | 0     | 0     | 0     | 0     | 4     | 1     | 1     | 6     | 4     | 5     | 0     | 2     | 0     | 0     | 2     | 1     | 2     | 2     | 1     | 0     | 3     | 4     | 2     | 0     | 1     | 0     | 2     | Xkr9    |
| Xkxr    | 133   | 89    | 67    | 150   | 187   | 166   | 174   | 28    | 21    | 40    | 25    | 31    | 31    | 12    | 111   | 96    | 139   | 157   | 158   | 129   | 151   | 37    | 31    | 29    | 18    | 42    | 22    | 14    | Xkxr    |
| Xlr     | 52    | 53    | 98    | 62    | 45    | 25    | 29    | 38    | 63    | 32    | 66    | 54    | 79    | 48    | 73    | 65    | 53    | 81    | 70    | 69    | 32    | 67    | 107   | 55    | 66    | 43    | 55    | 55    | Xlr     |
| Xlr3a   | 227   | 274   | 344   | 230   | 125   | 160   | 274   | 73    | 130   | 207   | 227   | 160   | 120   | 213   | 248   | 111   | 155   | 129   | 71    | 201   | 194   | 391   | 275   | 168   | 226   | 212   | 123   | 220   | Xlr3a   |
| Xlr3b   | 929   | 1313  | 1835  | 1298  | 1258  | 846   | 980   | 79    | 662   | 552   | 766   | 566   | 677   | 841   | 1199  | 231   | 712   | 1004  | 380   | 1151  | 945   | 1491  | 1030  | 1325  | 1524  | 885   | 675   | 957   | Xlr3b   |
| Xlr3c   | 6     | 10    | 15    | 8     | 7     | 4     | 4     | 9     | 9     | 10    | 16    | 15    | 7     | 7     | 3     | 2     | 5     | 3     | 2     | 12    | 16    | 28    | 8     | 7     | 7     | 10    | 2     | 5     | Xlr3c   |
| Xlr4a   | 58    | 73    | 213   | 59    | 19    | 8     | 34    | 9     | 34    | 46    | 142   | 41    | 15    | 151   | 198   | 13    | 29    | 62    | 12    | 104   | 86    | 130   | 71    | 58    | 92    | 81    | 5     | 195   | Xlr4a   |
| Xlr4b   | 48    | 67    | 76    | 70    | 43    | 47    | 36    | 2     | 36    | 44    | 46    | 35    | 52    | 63    | 46    | 9     | 24    | 50    | 15    | 58    | 19    | 182   | 32    | 61    | 135   | 110   | 21    | 76    | Xlr4b   |
| Xlr4c   | 0     | 5     | 11    | 5     | 1     | 3     | 4     | 0     | 0     | 3     | 4     | 1     | 1     | 7     | 8     | 2     | 0     | 4     | 0     | 7     | 1     | 13    | 3     | 2     | 3     | 0     | 1     | 14    | Xlr4c   |
| Xlr5a   | 1     | 1     | 1     | 0     | 16    | 0     | 0     | 1     | 0     | 0     | 0     | 0     | 0     | 0     | 0     | 0     | 0     | 0     | 0     | 2     | 1     | 2     | 3     | 0     | 0     | 1     | 0     | 0     | Xlr5a   |
| Xlr5b   | 1     | 0     | 0     | 2     | 0     | 0     | 0     | 0     | 0     | 2     | 0     | 3     | 0     | 1     | 0     | 0     | 0     | 0     | 0     | 0     | 0     | 2     | 1     | 0     | 4     | 0     | 0     | 1     | Xlr5b   |
| Xlr5c   | 0     | 0     | 2     | 0     | 0     | 0     | 0     | 0     | 1     | 0     | 0     | 0     | 0     | 0     | 0     | 0     | 0     | 0     | 0     | 0     | 0     | 0     | 0     | 0     | 0     | 0     | 0     | 1     | Xlr5c   |
| Xndc1   | 593   | 489   | 455   | 593   | 593   | 608   | 708   | 1073  | 990   | 1233  | 1128  | 1234  | 1054  | 1503  | 484   | 384   | 496   | 614   | 623   | 557   | 701   | 996   | 991   | 1197  | 1202  | 1045  | 1148  | 1317  | Xndc1   |
| Xntrpc  | 36    | 60    | 50    | 80    | 52    | 25    | 64    | 65    | 56    | 74    | 63    | 85    | 56    | 60    | 50    | 35    | 56    | 54    | 56    | 20    | 36    | 74    | 40    | 61    | 90    | 52    | 71    | 90    | Xntrpc  |
| Xpa     | 1151  | 974   | 883   | 1093  | 1068  | 943   | 1238  | 1121  | 899   | 990   | 862   | 1007  | 907   | 1126  | 1150  | 916   | 954   | 1037  | 967   | 1229  | 1052  | 976   | 874   | 1092  | 1032  | 898   | 984   | 991   | Xpa     |
| Xpc     | 3801  | 4238  | 3458  | 3928  | 3499  | 3606  | 3612  | 2540  | 2627  | 2464  | 2539  | 2777  | 2872  | 2839  | 3915  | 3842  | 3777  | 3902  | 3770  | 3858  | 3660  | 2358  | 2500  | 2648  | 2976  | 2741  | 2989  | 2794  | Xpc     |
| Xpnep1  | 5906  | 6576  | 5178  | 4896  | 4618  | 5161  | 4226  | 4279  | 5118  | 4435  | 4722  | 4899  | 4769  | 4300  | 5562  | 6108  | 5098  | 4814  | 5001  | 5281  | 4505  | 3893  |       |       |       |       |       |       |         |

|        |       |       |       |       |       |       |       |       |       |       |       |       |       |       |       |       |       |       |       |       |       |       |       |       |       |       |       |        |        |        |
|--------|-------|-------|-------|-------|-------|-------|-------|-------|-------|-------|-------|-------|-------|-------|-------|-------|-------|-------|-------|-------|-------|-------|-------|-------|-------|-------|-------|--------|--------|--------|
| Ybx1   | 55063 | 57861 | 69908 | 65267 | 59441 | 55876 | 59251 | 46989 | 47723 | 56719 | 49667 | 58105 | 51551 | 61241 | 53655 | 52167 | 65446 | 60203 | 63832 | 56024 | 62544 | 45475 | 48011 | 58605 | 57492 | 67795 | 57701 | 61248  | Ybx1   |        |
| Ybx2   | 5008  | 5483  | 5555  | 6377  | 4979  | 4770  | 5259  | 1320  | 1285  | 1503  | 1435  | 1479  | 1930  | 1293  | 4278  | 5135  | 5800  | 6107  | 5801  | 4305  | 4604  | 1546  | 1322  | 1604  | 1353  | 1818  | 1343  | 1280   | Ybx2   |        |
| Ybx3   | 5828  | 6296  | 7287  | 6283  | 5646  | 5470  | 4973  | 4670  | 5811  | 5824  | 6588  | 6154  | 5925  | 6095  | 5309  | 6084  | 6531  | 6064  | 6104  | 4809  | 5419  | 4677  | 5954  | 6355  | 5437  | 7408  | 5998  | 6214   | Ybx3   |        |
| Ydc1   | 631   | 774   | 628   | 651   | 830   | 652   | 619   | 401   | 569   | 542   | 551   | 286   | 352   | 301   | 636   | 621   | 669   | 676   | 696   | 727   | 654   | 565   | 467   | 389   | 469   | 268   | 302   | 273    | Ydc1   |        |
| Yeast2 | 8120  | 7525  | 6417  | 7306  | 7183  | 7982  | 7168  | 10000 | 10921 | 10244 | 10583 | 10759 | 10656 | 10564 | 7279  | 7872  | 6511  | 7123  | 7183  | 6852  | 7329  | 9687  | 10156 | 9825  | 10379 | 8209  | 10922 | 10059  | Yeast2 |        |
| Yeast4 | 2994  | 3030  | 3420  | 3125  | 3062  | 2810  | 3336  | 5851  | 4899  | 5774  | 4897  | 6554  | 5364  | 7114  | 3030  | 2295  | 3262  | 2750  | 3441  | 3216  | 3464  | 5360  | 4717  | 6333  | 5950  | 7281  | 6420  | 7162   | Yeast4 |        |
| Yes1   | 5999  | 4583  | 5795  | 6011  | 5693  | 5867  | 6606  | 4059  | 3442  | 3444  | 3864  | 3898  | 3909  | 4305  | 6384  | 5955  | 5539  | 5829  | 5327  | 6134  | 6124  | 3623  | 3610  | 3610  | 3624  | 3880  | 3811  | 4179   | Yes1   |        |
| Yff1a  | 1630  | 2019  | 1524  | 1392  | 1136  | 1239  | 1222  | 1072  | 1309  | 1108  | 1087  | 1107  | 1212  | 1081  | 1609  | 1629  | 1493  | 1264  | 1128  | 1398  | 1248  | 964   | 1341  | 1088  | 944   | 1185  | 1230  | 1157   | Yff1a  |        |
| Yff1b  | 1336  | 1772  | 1522  | 1402  | 1292  | 1308  | 1026  | 882   | 1128  | 1020  | 1170  | 1158  | 1154  | 875   | 1278  | 1493  | 1545  | 1225  | 1493  | 1172  | 1180  | 866   | 1238  | 1095  | 1009  | 1296  | 1178  | 994    | Yff1b  |        |
| Yfp1   | 1658  | 1867  | 1329  | 1510  | 1532  | 1434  | 1465  | 1680  | 1708  | 1335  | 1513  | 1283  | 1357  | 1252  | 1763  | 1783  | 1373  | 1442  | 1615  | 1803  | 1521  | 1397  | 1768  | 1240  | 1466  | 1256  | 1361  | 1282   | Yfp1   |        |
| Yfp2   | 376   | 380   | 405   | 314   | 419   | 378   | 292   | 849   | 864   | 853   | 871   | 862   | 872   | 865   | 331   | 341   | 350   | 344   | 284   | 313   | 312   | 755   | 914   | 781   | 837   | 903   | 859   | 862    | Yfp2   |        |
| Yfp3   | 2659  | 3568  | 3161  | 3457  | 2707  | 2879  | 2690  | 2155  | 2573  | 2663  | 2629  | 2586  | 2486  | 2423  | 2734  | 2925  | 3326  | 3254  | 3352  | 2660  | 2862  | 2481  | 2586  | 2720  | 2561  | 2699  | 2622  | 2398   | Yfp3   |        |
| Yfp4   | 2397  | 1836  | 2236  | 2391  | 1975  | 2182  | 2408  | 2748  | 2120  | 2175  | 2223  | 2235  | 2278  | 2336  | 2540  | 2221  | 2125  | 2189  | 2110  | 2416  | 2255  | 2563  | 2345  | 2488  | 2509  | 2390  | 2418  | 2438   | Yfp4   |        |
| Yfp5   | 4564  | 3652  | 4062  | 3859  | 3646  | 3677  | 3930  | 4827  | 4439  | 4085  | 4386  | 4152  | 4123  | 3977  | 4609  | 4206  | 3866  | 3957  | 3683  | 3966  | 3881  | 4659  | 4779  | 3973  | 4049  | 4406  | 4291  | 4174   | Yfp5   |        |
| Yfp6   | 3938  | 3048  | 3489  | 3888  | 4001  | 3922  | 4225  | 4651  | 3662  | 3908  | 3991  | 4313  | 4266  | 4516  | 4032  | 3382  | 3564  | 3713  | 3775  | 4036  | 3969  | 4515  | 3695  | 3934  | 3997  | 3850  | 4302  | 4145   | Yfp6   |        |
| Yfp7   | 2     | 3     | 4     | 0     | 5     | 7     | 3     | 1     | 2     | 0     | 15    | 7     | 0     | 0     | 7     | 9     | 6     | 4     | 4     | 3     | 2     | 0     | 5     | 2     | 4     | 2     | 1     | 4      | Yfp7   |        |
| Yjfn3  | 137   | 219   | 264   | 301   | 242   | 191   | 184   | 128   | 123   | 175   | 153   | 163   | 192   | 126   | 191   | 172   | 289   | 303   | 309   | 208   | 212   | 244   | 148   | 234   | 193   | 173   | 207   | 158    | Yjfn3  |        |
| Yju2   | 517   | 600   | 665   | 724   | 632   | 630   | 654   | 960   | 1083  | 1077  | 962   | 1228  | 1178  | 1365  | 535   | 455   | 651   | 598   | 680   | 616   | 660   | 916   | 986   | 1670  | 1244  | 1407  | 1361  | 1416   | Yju2   |        |
| Yk6    | 13609 | 14120 | 14265 | 14209 | 12337 | 12229 | 12245 | 10572 | 10640 | 10679 | 10328 | 10839 | 10211 | 10842 | 12988 | 12872 | 13917 | 13439 | 12950 | 12290 | 12200 | 10494 | 9958  | 10924 | 11251 | 11951 | 11238 | 11261  | Yk6    |        |
| Ylpm1  | 10980 | 10033 | 12197 | 13198 | 13758 | 13617 | 13422 | 12841 | 13146 | 15281 | 14266 | 16385 | 14402 | 16518 | 10747 | 11582 | 12698 | 12734 | 13411 | 10497 | 13893 | 14674 | 11417 | 15141 | 15881 | 12324 | 14139 | 15276  | Ylpm1  |        |
| Yme11  | 18765 | 14309 | 16555 | 14691 | 14064 | 14771 | 16748 | 18104 | 15658 | 13646 | 14746 | 15896 | 16465 | 16400 | 19440 | 17614 | 15433 | 14520 | 14686 | 18222 | 15292 | 15244 | 16573 | 14849 | 14627 | 16399 | 16706 | 17289  | Yme11  |        |
| Yod1   | 1998  | 1436  | 1712  | 1930  | 1761  | 2045  | 2284  | 2313  | 2129  | 1936  | 1774  | 2234  | 2209  | 2442  | 2116  | 1927  | 1962  | 1697  | 1876  | 2120  | 2055  | 2017  | 2048  | 2112  | 1921  | 2122  | 2323  | 2537   | Yod1   |        |
| Ypel1  | 2149  | 2120  | 2018  | 1936  | 2492  | 2623  | 2737  | 5120  | 4696  | 4733  | 3980  | 4952  | 4312  | 5486  | 2235  | 1764  | 2019  | 1906  | 2583  | 2696  | 2806  | 4939  | 4553  | 4855  | 5474  | 5226  | 5281  | 5185   | Ypel1  |        |
| Ypel2  | 2587  | 2871  | 2564  | 3747  | 2675  | 3058  | 3379  | 1551  | 1461  | 1862  | 1828  | 1574  | 1546  | 1822  | 2740  | 2736  | 3118  | 3554  | 3063  | 2635  | 3287  | 1882  | 1353  | 2115  | 1790  | 1880  | 1655  | 1812   | Ypel2  |        |
| Ypel3  | 1882  | 2645  | 2194  | 2851  | 2803  | 2562  | 2633  | 1850  | 2179  | 2391  | 2206  | 1966  | 2137  | 2097  | 2060  | 2293  | 2889  | 2946  | 3052  | 2636  | 2684  | 2309  | 2153  | 2336  | 2437  | 2119  | 1909  | 1854   | Ypel3  |        |
| Ypel4  | 768   | 909   | 937   | 1222  | 1453  | 1117  | 1292  | 1280  | 1240  | 1796  | 1409  | 1724  | 1881  | 1920  | 778   | 703   | 1207  | 1205  | 1491  | 1116  | 1412  | 1803  | 1147  | 1872  | 1840  | 1346  | 1769  | 1869   | Ypel4  |        |
| Ypel5  | 3963  | 3515  | 4014  | 4283  | 4291  | 4320  | 4949  | 4629  | 3587  | 3518  | 3328  | 3649  | 3774  | 3972  | 4667  | 3839  | 4278  | 4291  | 4263  | 5019  | 4690  | 4299  | 3988  | 3652  | 4270  | 3599  | 3624  | 4082   | Ypel5  |        |
| Yrdc   | 1931  | 1890  | 2321  | 2212  | 2011  | 1743  | 2150  | 1476  | 1336  | 1532  | 1329  | 1606  | 1390  | 1794  | 1782  | 1615  | 2135  | 2126  | 2225  | 1725  | 2251  | 1572  | 1295  | 1665  | 1593  | 1722  | 1495  | 1729   | Yrdc   |        |
| Ythdc1 | 9370  | 7866  | 10547 | 11341 | 10258 | 10283 | 11901 | 11342 | 9722  | 11708 | 11111 | 11948 | 11324 | 13502 | 9233  | 8888  | 10585 | 10830 | 10470 | 9351  | 11022 | 11729 | 9417  | 12549 | 11859 | 11747 | 12893 | Ythdc1 |        |        |
| Ythdc2 | 3945  | 2951  | 2757  | 3303  | 3818  | 4014  | 3936  | 6444  | 3666  | 3044  | 3587  | 3416  | 3559  | 3654  | 4085  | 3377  | 3167  | 3311  | 3513  | 4412  | 4083  | 3801  | 3696  | 3108  | 3621  | 2559  | 3665  | 3616   | Ythdc2 |        |
| Ythdf1 | 8194  | 8654  | 8629  | 8762  | 7376  | 7233  | 7623  | 6245  | 6113  | 5729  | 5909  | 6740  | 7796  | 6386  | 6740  | 7796  | 8056  | 8324  | 8244  | 7580  | 7038  | 7706  | 6147  | 5979  | 6579  | 6873  | 7598  | 6735   | 7253   | Ythdf1 |
| Ythdf2 | 6998  | 6094  | 7270  | 6476  | 7407  | 6827  | 7717  | 9104  | 7666  | 8178  | 7677  | 9203  | 8744  | 9753  | 6887  | 6227  | 7342  | 6534  | 7564  | 7032  | 7234  | 8732  | 7402  | 8541  | 9022  | 10120 | 9415  | 10151  | Ythdf2 |        |
| Ythdf3 | 14324 | 10327 | 15128 | 15052 | 14492 | 15241 | 16474 | 13623 | 11804 | 12355 | 13782 | 15504 | 15080 | 16091 | 14507 | 13330 | 14397 | 14786 | 14621 | 12897 | 15152 | 14639 | 11804 | 14028 | 14235 | 14674 | 15591 | 15991  | Ythdf3 |        |
| Ywhab  | 32987 | 31007 | 33221 | 33432 | 34845 | 32810 | 35113 | 29634 | 27774 | 29545 | 27969 | 29990 | 28207 | 28638 | 33534 | 30931 | 33237 | 33905 | 34379 | 31659 | 34937 | 32946 | 28622 | 28320 | 29734 | 31061 | 28755 | 30134  | Ywhab  |        |
| Ywhac  | 63789 | 55620 | 69545 | 61786 | 63509 | 58728 | 72167 | 82857 | 70361 | 78204 | 70434 | 85388 | 78118 | 94676 | 66851 | 53112 | 67183 | 60005 | 65449 | 63004 | 69316 | 84725 | 71741 | 87009 | 82586 | 97473 | 84158 | 97735  | Ywhac  |        |
| Ywhag  | 22429 | 27076 | 31264 | 35483 | 41042 | 33812 | 34719 | 31072 | 33169 | 39377 | 36530 | 35705 | 33539 | 37152 | 24857 | 24114 | 33940 | 36716 | 39121 | 31187 | 37040 | 43758 | 31321 | 39374 | 45011 | 33413 | 32060 | 36256  | Ywhag  |        |
| Ywhah  | 10200 | 9268  | 11088 | 10390 | 12980 | 11264 | 16425 | 16425 | 14627 | 15447 | 15052 | 15487 | 15766 | 17223 | 10833 | 9104  | 11218 | 10907 | 11933 | 11045 | 12780 | 17619 | 14879 | 15904 | 16143 | 17082 | 15177 | 18002  | Ywhah  |        |
| Ywhaq  | 32746 | 30307 | 28751 | 27648 | 28804 | 28823 | 33255 | 40646 | 34279 | 29670 | 29759 | 34349 | 33806 | 36771 | 36415 | 30968 | 29270 | 28064 | 30124 | 36992 | 31009 | 34920 | 34934 | 31711 | 33373 | 37703 | 35958 | 38911  | Ywhaq  |        |
| Ywhaz  | 35275 | 31029 | 38894 | 35881 | 37018 | 35479 | 40534 | 51933 | 46143 | 45470 | 44141 | 52527 | 49277 | 53836 | 36540 | 30746 | 37298 | 34614 | 37640 | 39217 | 38544 | 51523 | 46368 | 50314 | 52052 | 57231 | 52632 | 55890  | Ywhaz  |        |
| Yy1    | 9853  | 8860  | 11045 | 10611 | 10073 | 9970  | 10813 | 10304 | 9277  | 9969  | 10007 | 11625 | 10411 | 11539 | 9455  | 9338  | 10851 | 10402 | 10546 | 8909  | 10887 | 10325 | 9222  | 10511 | 10669 | 11585 | 10771 | 11858  | Yy1    |        |
| Zadh2  | 1884  | 1563  | 2439  | 1760  | 2146  | 1970  | 1876  | 1961  | 2039  | 2206  | 3269  | 2063  | 2453  | 2164  | 1685  | 1802  | 2204  | 1806  | 1901  | 1661  | 1708  | 2201  | 2503  | 2303  | 2157  | 2572  | 2060  | 2265   | Zadh2  |        |
| Zan    | 39    | 24    | 31    | 22    | 46    | 31    | 18    | 56    | 112   | 65    | 112   | 67    | 59    | 52    | 17    | 32    | 21    | 44    | 37    | 16    | 26    | 94    | 87    | 70    | 92    | 55    | 50    | 43     | Zan    |        |
| Zap70  | 23    | 9     | 20    | 28    | 29    | 21    | 25    | 31    | 31    | 32    | 33    | 25    | 51    | 24    | 17    | 15    | 20    | 21    | 32    | 18    | 21    | 50    | 42    | 49    | 22    | 39    | 31    | 24     | Zap70  |        |
| Zar1   | 39    | 33    | 48    | 38    | 38    | 46    | 25    | 59    | 66    | 44    | 60    | 51    | 98    | 65    | 36    | 33    | 36    | 23    | 37    | 51    | 36    | 62    | 76    | 55    | 81    | 29    | 57    | 72     | Zar1   |        |
| Zar1l  | 0     | 0     | 0     | 1     | 0     | 0     | 0     | 0     | 0     | 0     | 0     | 0     | 0     | 0     | 0     | 0     | 0     | 0     | 0     | 0     | 3     | 0     | 0     | 2     | 0     | 0     | 0     | 1      | Zar1l  |        |
| Zbbx   | 28    | 19    | 7     | 23    | 43    | 28    | 30    | 40    | 37    | 42    | 9     | 30    | 31    | 35    | 44    | 44    | 16    | 12    | 23    |       |       |       |       |       |       |       |       |        |        |        |

|          |       |       |       |       |       |       |       |       |       |       |       |       |       |       |       |       |       |       |       |       |       |       |       |       |       |       |       |       |          |        |
|----------|-------|-------|-------|-------|-------|-------|-------|-------|-------|-------|-------|-------|-------|-------|-------|-------|-------|-------|-------|-------|-------|-------|-------|-------|-------|-------|-------|-------|----------|--------|
| Zbtb45   | 692   | 703   | 986   | 934   | 965   | 873   | 838   | 1220  | 1353  | 1697  | 1444  | 1803  | 1354  | 1704  | 588   | 590   | 993   | 829   | 1064  | 736   | 856   | 1711  | 1344  | 1898  | 1661  | 1940  | 1404  | 1608  | Zbtb45   |        |
| Zbtb46   | 3498  | 4038  | 3897  | 4002  | 4058  | 3788  | 3836  | 2014  | 1611  | 1808  | 1793  | 1874  | 1830  | 1744  | 3949  | 3697  | 4051  | 3881  | 3760  | 3986  | 3792  | 2511  | 1612  | 1655  | 2121  | 1434  | 2038  | 1805  | Zbtb46   |        |
| Zbtb48   | 1415  | 2136  | 1790  | 2256  | 1359  | 1573  | 1476  | 1065  | 1145  | 1190  | 1204  | 1333  | 1237  | 1178  | 1369  | 1794  | 1987  | 1819  | 1633  | 1608  | 1387  | 1206  | 1190  | 1279  | 1242  | 1358  | 1428  | 1191  | Zbtb48   |        |
| Zbtb49   | 1375  | 1626  | 1110  | 1451  | 1433  | 1435  | 1381  | 1249  | 1264  | 1255  | 1165  | 1302  | 1266  | 1237  | 1302  | 1530  | 1308  | 1566  | 1317  | 1437  | 1385  | 1151  | 1115  | 1119  | 1369  | 947   | 1314  | 1044  | Zbtb49   |        |
| Zbtb5    | 5660  | 6464  | 5228  | 5958  | 5971  | 5674  | 5580  | 5343  | 4970  | 4947  | 4381  | 5106  | 4812  | 4839  | 5559  | 5566  | 5628  | 5765  | 6131  | 6015  | 6104  | 4913  | 4667  | 4971  | 5538  | 4786  | 5016  | 5079  | Zbtb5    |        |
| Zbtb6    | 2925  | 2462  | 2828  | 3429  | 3373  | 3327  | 3741  | 4185  | 3485  | 3419  | 3522  | 3410  | 3277  | 3608  | 3241  | 2722  | 2970  | 3506  | 3183  | 3841  | 3655  | 3723  | 3592  | 3640  | 3770  | 3390  | 3469  | 3743  | Zbtb6    |        |
| Zbtb7a   | 1233  | 1473  | 1784  | 2028  | 1831  | 1489  | 1528  | 1371  | 1551  | 1905  | 1920  | 1731  | 1690  | 1798  | 1192  | 1219  | 1990  | 1829  | 1897  | 1362  | 1490  | 1658  | 1626  | 2093  | 1808  | 1989  | 1658  | 1673  | Zbtb7a   |        |
| Zbtb7b   | 738   | 1041  | 1009  | 1016  | 720   | 696   | 640   | 270   | 282   | 368   | 306   | 186   | 208   | 172   | 618   | 857   | 946   | 899   | 895   | 677   | 690   | 134   | 394   | 357   | 126   | 401   | 202   | 186   | Zbtb7b   |        |
| Zbtb7c   | 271   | 342   | 327   | 478   | 542   | 417   | 387   | 464   | 512   | 574   | 574   | 470   | 301   | 436   | 281   | 304   | 385   | 473   | 469   | 440   | 423   | 772   | 566   | 664   | 601   | 471   | 313   | 368   | Zbtb7c   |        |
| Zbtb8a   | 376   | 388   | 432   | 362   | 536   | 440   | 421   | 797   | 825   | 722   | 804   | 792   | 803   | 735   | 436   | 377   | 467   | 362   | 521   | 450   | 456   | 947   | 903   | 766   | 777   | 696   | 798   | 749   | Zbtb8a   |        |
| Zbtb8b   | 712   | 897   | 539   | 977   | 1013  | 914   | 910   | 611   | 621   | 510   | 441   | 355   | 407   | 287   | 884   | 965   | 737   | 1005  | 850   | 1089  | 873   | 673   | 606   | 442   | 479   | 255   | 279   | 271   | Zbtb8b   |        |
| Zbtb8os  | 1517  | 1316  | 1558  | 1448  | 1222  | 1395  | 1397  | 1366  | 1234  | 1258  | 1347  | 1576  | 1557  | 1657  | 1444  | 1336  | 1326  | 1351  | 1315  | 1428  | 1336  | 1257  | 1349  | 1588  | 1389  | 1578  | 1743  | 1717  | Zbtb8os  |        |
| Zbtb9    | 306   | 326   | 299   | 448   | 324   | 369   | 386   | 182   | 129   | 179   | 149   | 176   | 170   | 229   | 307   | 285   | 336   | 384   | 370   | 308   | 936   | 247   | 132   | 199   | 217   | 164   | 206   | 214   | Zbtb9    |        |
| Zc2hc1a  | 7917  | 6519  | 6658  | 8670  | 9460  | 9269  | 9744  | 7863  | 6422  | 6143  | 5642  | 5767  | 5464  | 5909  | 9505  | 7527  | 7594  | 8876  | 8499  | 10509 | 9369  | 7553  | 6421  | 5779  | 6682  | 5325  | 5251  | 5428  | Zc2hc1a  |        |
| Zc2hc1b  | 8     | 10    | 4     | 4     | 2     | 3     | 1     | 1     | 2     | 0     | 9     | 2     | 0     | 1     | 3     | 3     | 7     | 8     | 0     | 1     | 5     | 0     | 1     | 1     | 1     | 4     | 1     | 7     | Zc2hc1b  |        |
| Zc2hc1c  | 224   | 285   | 308   | 270   | 268   | 276   | 247   | 122   | 100   | 113   | 124   | 166   | 168   | 116   | 256   | 301   | 299   | 249   | 309   | 269   | 275   | 95    | 152   | 123   | 116   | 138   | 137   | 147   | Zc2hc1c  |        |
| Zc3h10   | 1472  | 1832  | 1784  | 1792  | 1577  | 1412  | 1562  | 1398  | 1397  | 1707  | 1345  | 1737  | 1580  | 1588  | 1246  | 1559  | 1708  | 1665  | 1808  | 1393  | 1570  | 1409  | 1284  | 1729  | 1552  | 1711  | 1625  | 1710  | Zc3h10   |        |
| Zc3h11a  | 1040  | 720   | 545   | 835   | 775   | 1063  | 1049  | 1700  | 1433  | 934   | 1510  | 1176  | 1260  | 1483  | 1085  | 1011  | 542   | 759   | 775   | 930   | 1140  | 1170  | 1490  | 1025  | 1178  | 470   | 1273  | 1275  | Zc3h11a  |        |
| Zc3h12a  | 106   | 172   | 138   | 144   | 93    | 95    | 104   | 24    | 54    | 47    | 42    | 28    | 43    | 29    | 79    | 227   | 194   | 142   | 103   | 79    | 99    | 32    | 52    | 42    | 23    | 60    | 48    | 40    | Zc3h12a  |        |
| Zc3h12b  | 751   | 542   | 478   | 498   | 598   | 633   | 535   | 651   | 648   | 566   | 696   | 629   | 575   | 598   | 653   | 626   | 574   | 532   | 548   | 622   | 549   | 653   | 613   | 514   | 541   | 476   | 646   | 538   | Zc3h12b  |        |
| Zc3h12c  | 4012  | 3771  | 2726  | 3725  | 3688  | 4418  | 4421  | 4774  | 3652  | 3464  | 3372  | 4720  | 4384  | 5240  | 4385  | 3096  | 3233  | 3158  | 3778  | 4867  | 4567  | 3698  | 3359  | 3642  | 4495  | 2973  | 5605  | 4808  | Zc3h12c  |        |
| Zc3h12d  | 25    | 24    | 32    | 70    | 42    | 50    | 44    | 10    | 26    | 32    | 49    | 25    | 26    | 14    | 38    | 23    | 44    | 70    | 33    | 27    | 33    | 40    | 25    | 25    | 15    | 23    | 24    | 15    | Zc3h12d  |        |
| Zc3h13   | 12908 | 12925 | 12597 | 15027 | 13287 | 14002 | 15072 | 9236  | 9409  | 10721 | 10001 | 11192 | 10486 | 12086 | 12330 | 12065 | 13451 | 14399 | 13410 | 13669 | 14437 | 9087  | 8211  | 10878 | 11138 | 9448  | 10667 | 11039 | Zc3h13   |        |
| Zc3h14   | 18468 | 15455 | 14415 | 13517 | 12487 | 13564 | 15414 | 13676 | 11920 | 10317 | 10360 | 12159 | 11426 | 12401 | 18969 | 15397 | 13426 | 13168 | 12886 | 15751 | 14132 | 11304 | 11729 | 10587 | 10369 | 12700 | 12260 | 12506 | Zc3h14   |        |
| Zc3h15   | 13560 | 12232 | 14618 | 13479 | 12553 | 12459 | 14729 | 12660 | 10306 | 10819 | 10383 | 11745 | 11218 | 13415 | 14884 | 12863 | 13383 | 12776 | 13012 | 13963 | 13286 | 11754 | 10384 | 11806 | 11414 | 13414 | 12085 | 12648 | Zc3h15   |        |
| Zc3h18   | 6392  | 7474  | 9205  | 8155  | 6717  | 6615  | 6452  | 5729  | 6673  | 8165  | 7362  | 9110  | 8031  | 9102  | 5884  | 6685  | 8321  | 7275  | 7424  | 5982  | 6768  | 6447  | 6084  | 8654  | 7804  | 9875  | 8077  | 9022  | Zc3h18   |        |
| Zc3h3    | 1318  | 2084  | 2362  | 2409  | 2018  | 1710  | 1619  | 1095  | 1295  | 1628  | 1573  | 1618  | 1322  | 1347  | 1213  | 1837  | 2175  | 2506  | 2138  | 1383  | 1787  | 1491  | 1359  | 1574  | 1587  | 1949  | 1318  | 1377  | Zc3h3    |        |
| Zc3h4    | 3149  | 3270  | 5198  | 3716  | 4222  | 3617  | 3566  | 7330  | 8993  | 11119 | 9362  | 12189 | 10046 | 11048 | 10484 | 3026  | 3016  | 4868  | 3620  | 4885  | 3081  | 3613  | 9859  | 8000  | 11811 | 11198 | 10965 | 10668 | 10966    | Zc3h4  |
| Zc3h6    | 1047  | 688   | 767   | 1111  | 992   | 1035  | 1236  | 954   | 854   | 887   | 840   | 1128  | 983   | 1084  | 1094  | 746   | 863   | 889   | 881   | 1024  | 1113  | 978   | 891   | 1019  | 920   | 859   | 939   | 1009  | Zc3h6    |        |
| Zc3h7a   | 11300 | 9228  | 9664  | 9809  | 10184 | 10979 | 11559 | 9355  | 8232  | 8238  | 8862  | 8348  | 8716  | 8572  | 11239 | 10449 | 9631  | 9993  | 10198 | 11688 | 11508 | 8793  | 8287  | 8005  | 8276  | 7100  | 8435  | 8153  | Zc3h7a   |        |
| Zc3h7b   | 8185  | 8815  | 11476 | 11358 | 13921 | 11582 | 10724 | 13515 | 16202 | 19517 | 18266 | 20407 | 16380 | 18397 | 1556  | 8158  | 12265 | 11717 | 13296 | 9504  | 12274 | 19153 | 15850 | 20956 | 20349 | 20247 | 17053 | 17813 | Zc3h7b   |        |
| Zc3h8    | 716   | 587   | 845   | 932   | 943   | 853   | 969   | 855   | 751   | 801   | 792   | 810   | 770   | 781   | 816   | 646   | 898   | 878   | 886   | 985   | 852   | 800   | 732   | 865   | 976   | 957   | 679   | 765   | Zc3h8    |        |
| Zc3hav1  | 391   | 388   | 458   | 267   | 319   | 310   | 247   | 305   | 376   | 371   | 475   | 360   | 786   | 341   | 435   | 500   | 345   | 296   | 282   | 409   | 272   | 329   | 414   | 367   | 300   | 354   | 573   | 722   | Zc3hav1  |        |
| Zc3hav1l | 2512  | 1762  | 2660  | 2187  | 2718  | 2521  | 2378  | 5388  | 5463  | 5964  | 6040  | 6201  | 6002  | 6067  | 2325  | 2402  | 2520  | 2178  | 2540  | 2045  | 2199  | 6411  | 5350  | 6042  | 5905  | 6047  | 6019  | 5952  | Zc3hav1l |        |
| Zc3hc1   | 2853  | 3207  | 2564  | 2602  | 2362  | 2479  | 2452  | 2922  | 2899  | 2394  | 2357  | 2843  | 2843  | 2756  | 2934  | 2778  | 2760  | 2360  | 2513  | 2795  | 2582  | 2496  | 2951  | 2453  | 2439  | 3396  | 3002  | 2922  | Zc3hc1   |        |
| Zc3h2    | 2774  | 2351  | 2587  | 2668  | 3096  | 2985  | 3437  | 6017  | 4359  | 4149  | 3555  | 4442  | 3718  | 5143  | 3417  | 2415  | 2717  | 2820  | 3243  | 3875  | 3480  | 5407  | 4295  | 4683  | 4846  | 4470  | 4371  | 4702  | Zc3h2    |        |
| Zcchc10  | 490   | 419   | 640   | 394   | 391   | 387   | 486   | 797   | 644   | 661   | 764   | 910   | 797   | 984   | 446   | 444   | 505   | 398   | 419   | 440   | 405   | 719   | 702   | 793   | 711   | 1000  | 1049  | 970   | Zcchc10  |        |
| Zcchc12  | 7124  | 8303  | 7434  | 9561  | 10099 | 9478  | 10487 | 6630  | 5958  | 6821  | 5062  | 5251  | 4118  | 5547  | 8400  | 6847  | 9084  | 9710  | 10188 | 10549 | 11160 | 8776  | 5773  | 6436  | 7481  | 3922  | 4862  | 4812  | Zcchc12  |        |
| Zcchc13  | 0     | 0     | 0     | 0     | 1     | 1     | 3     | 2     | 2     | 5     | 0     | 6     | 4     | 5     | 0     | 1     | 10    | 3     | 2     | 4     | 3     | 0     | 2     | 5     | 3     | 3     | 1     | 1     | Zcchc13  |        |
| Zcchc14  | 10577 | 13221 | 13202 | 16231 | 15338 | 13967 | 14500 | 8896  | 10150 | 12662 | 11501 | 13222 | 11024 | 12534 | 10007 | 11869 | 15425 | 16862 | 15895 | 11196 | 15638 | 12323 | 9073  | 12871 | 13690 | 10854 | 11133 | 11662 | Zcchc14  |        |
| Zcchc17  | 4146  | 4582  | 4393  | 4158  | 3540  | 3755  | 3950  | 2939  | 2823  | 2978  | 2756  | 2837  | 2601  | 2919  | 4450  | 4328  | 4226  | 4127  | 3955  | 4305  | 3886  | 2535  | 2804  | 2987  | 2894  | 3238  | 2909  | 3071  | Zcchc17  |        |
| Zcchc18  | 4075  | 4316  | 4071  | 4624  | 6713  | 5621  | 6645  | 7193  | 6697  | 6812  | 5752  | 6159  | 5468  | 6502  | 4486  | 3593  | 4799  | 4918  | 6179  | 6543  | 6227  | 8219  | 6635  | 6793  | 7956  | 6067  | 5504  | 5953  | Zcchc18  |        |
| Zcchc2   | 3468  | 3550  | 3847  | 4337  | 3701  | 3507  | 3616  | 1704  | 1547  | 1762  | 1721  | 1851  | 1880  | 1671  | 3314  | 3689  | 3891  | 4134  | 3690  | 2864  | 3556  | 1943  | 1544  | 1624  | 1715  | 1702  | 1715  | 1753  | Zcchc2   |        |
| Zcchc24  | 6127  | 5311  | 5363  | 4518  | 3422  | 4518  | 3174  | 3441  | 4354  | 3739  | 5881  | 3596  | 4625  | 3810  | 5297  | 7244  | 4541  | 5179  | 3289  | 3220  | 3396  | 3938  | 5357  | 4263  | 3406  | 4297  | 3767  | 3653  | Zcchc24  |        |
| Zcchc3   | 2264  | 2623  | 3727  | 2821  | 2155  | 2426  | 2016  | 2340  | 2742  | 2884  | 3242  | 3628  | 3443  | 3375  | 2048  | 2664  | 3078  | 2514  | 2572  | 2074  | 2021  | 2461  | 2731  | 3409  | 2966  | 4918  | 3737  | 3719  | Zcchc3   |        |
| Zcchc4   | 1151  | 953   | 1012  | 1030  | 1039  | 1152  | 1079  | 1746  | 1788  | 1760  | 1773  | 2053  | 1917  | 2154  | 2009  | 2934  | 3063  | 1061  | 854   | 1044  | 1122  | 1060  | 1686  | 1711  | 1752  | 1670  | 1811  | 2029  | 2009     | Zcchc4 |
| Zcchc7   | 3645  | 3039  | 3092  | 3316  | 3524  | 35    |       |       |       |       |       |       |       |       |       |       |       |       |       |       |       |       |       |       |       |       |       |       |          |        |



|         |       |       |       |       |       |       |       |       |       |       |       |       |       |       |       |       |       |       |       |       |       |       |       |       |       |       |       |       |         |
|---------|-------|-------|-------|-------|-------|-------|-------|-------|-------|-------|-------|-------|-------|-------|-------|-------|-------|-------|-------|-------|-------|-------|-------|-------|-------|-------|-------|-------|---------|
| Zfand1  | 2954  | 2496  | 2678  | 2510  | 2411  | 2550  | 2854  | 2492  | 2340  | 2173  | 2314  | 2676  | 2592  | 2629  | 3057  | 2762  | 2544  | 2538  | 2360  | 2993  | 2590  | 2246  | 2335  | 2134  | 2179  | 2645  | 2754  | 2496  | Zfand1  |
| Zfand2a | 2067  | 2384  | 1924  | 2266  | 2247  | 2251  | 2147  | 1871  | 2074  | 2153  | 2049  | 2185  | 2091  | 1923  | 1902  | 2041  | 2169  | 2265  | 2247  | 2076  | 2040  | 2154  | 2035  | 2108  | 2294  | 2152  | 1998  | 2051  | Zfand2a |
| Zfand2b | 821   | 1148  | 875   | 966   | 830   | 825   | 822   | 742   | 874   | 794   | 789   | 818   | 720   | 764   | 882   | 904   | 892   | 756   | 940   | 914   | 784   | 705   | 859   | 806   | 675   | 981   | 718   | 833   | Zfand2b |
| Zfand3  | 6734  | 8776  | 9601  | 9217  | 8836  | 8137  | 7456  | 7188  | 7814  | 9000  | 8006  | 9607  | 9003  | 8701  | 6996  | 7238  | 10045 | 8644  | 9587  | 7823  | 7784  | 7656  | 7745  | 9748  | 9029  | 10915 | 9386  | 9003  | Zfand3  |
| Zfand4  | 1927  | 1390  | 1851  | 1612  | 1644  | 1686  | 1964  | 1104  | 917   | 941   | 809   | 1351  | 1185  | 1359  | 1895  | 1498  | 1702  | 1676  | 1760  | 1881  | 1755  | 954   | 929   | 1093  | 1058  | 1374  | 1323  | 1444  | Zfand4  |
| Zfand5  | 11565 | 8849  | 10536 | 12785 | 12260 | 12256 | 12930 | 16339 | 13528 | 13367 | 13564 | 15135 | 14596 | 15860 | 12002 | 10328 | 10684 | 11968 | 11620 | 11700 | 12786 | 17662 | 13796 | 14274 | 15777 | 14353 | 15012 | 15892 | Zfand5  |
| Zfand6  | 13898 | 10908 | 14274 | 14173 | 13322 | 12750 | 15088 | 10695 | 8922  | 8752  | 8976  | 9993  | 9530  | 9044  | 15217 | 13261 | 13928 | 14155 | 13485 | 14584 | 13446 | 9899  | 9427  | 9295  | 9063  | 9986  | 9503  | 10263 | Zfand6  |
| Zfat    | 85    | 131   | 91    | 74    | 123   | 108   | 106   | 692   | 723   | 761   | 702   | 691   | 710   | 801   | 80    | 99    | 137   | 57    | 138   | 113   | 90    | 662   | 759   | 826   | 741   | 833   | 826   | 794   | Zfat    |
| Zfc3h1  | 18334 | 15933 | 11905 | 17047 | 15501 | 18107 | 17541 | 12384 | 10397 | 9574  | 10356 | 10087 | 10223 | 9949  | 18046 | 17175 | 13667 | 15936 | 14923 | 17223 | 17815 | 10863 | 9898  | 8208  | 9887  | 6316  | 10425 | 9077  | Zfc3h1  |
| Zfc2    | 5132  | 7080  | 8585  | 11074 | 12229 | 9805  | 9673  | 6618  | 6958  | 10782 | 8767  | 12386 | 9104  | 10747 | 5280  | 5556  | 11047 | 10817 | 12424 | 8044  | 10654 | 12773 | 6141  | 11860 | 11422 | 7562  | 9793  | 9781  | Zfc2    |
| Zfhx3   | 3893  | 3731  | 6703  | 6287  | 6250  | 6351  | 4906  | 7028  | 7004  | 13044 | 10680 | 12402 | 13213 | 11247 | 3646  | 4347  | 6889  | 6155  | 6560  | 4281  | 5879  | 13785 | 7058  | 13216 | 13042 | 9894  | 11024 | 11896 | Zfhx3   |
| Zfhx4   | 6819  | 5538  | 5927  | 5415  | 6391  | 7563  | 5965  | 19838 | 18325 | 19017 | 19189 | 18309 | 24621 | 19053 | 7030  | 6893  | 5478  | 4787  | 5379  | 6284  | 6479  | 18544 | 16643 | 14684 | 17950 | 12544 | 22331 | 19190 | Zfhx4   |
| Zfp1    | 879   | 793   | 898   | 1030  | 1104  | 1081  | 1122  | 1523  | 1495  | 1492  | 1642  | 1497  | 1472  | 1538  | 822   | 758   | 875   | 975   | 1128  | 1000  | 1042  | 1601  | 1441  | 1478  | 1478  | 1618  | 1488  | 1442  | Zfp1    |
| Zfp101  | 5542  | 3835  | 4034  | 3525  | 3034  | 3421  | 3537  | 4704  | 4268  | 3699  | 3825  | 4279  | 4240  | 4399  | 5098  | 4864  | 3442  | 3131  | 2927  | 4127  | 3344  | 3604  | 3987  | 3515  | 3456  | 3808  | 4735  | 4348  | Zfp101  |
| Zfp105  | 1428  | 1218  | 1470  | 1248  | 1248  | 1222  | 1386  | 2201  | 1772  | 1895  | 1716  | 2171  | 1946  | 2332  | 1316  | 1210  | 1331  | 1043  | 1188  | 1321  | 1214  | 1928  | 1693  | 2095  | 1960  | 2401  | 2409  | 2479  | Zfp105  |
| Zfp106  | 27472 | 24955 | 17687 | 19603 | 18567 | 21238 | 20466 | 20783 | 19442 | 17322 | 19950 | 19806 | 19085 | 18933 | 25322 | 24411 | 18149 | 19848 | 18417 | 21382 | 20471 | 16407 | 19621 | 16459 | 18058 | 13908 | 20828 | 18358 | Zfp106  |
| Zfp108  | 363   | 357   | 246   | 251   | 389   | 403   | 345   | 524   | 459   | 423   | 413   | 301   | 341   | 393   | 363   | 310   | 255   | 310   | 295   | 386   | 331   | 386   | 498   | 307   | 427   | 240   | 374   | 280   | Zfp108  |
| Zfp109  | 379   | 358   | 339   | 337   | 385   | 390   | 382   | 484   | 516   | 507   | 463   | 454   | 481   | 454   | 377   | 379   | 392   | 330   | 459   | 332   | 346   | 418   | 467   | 440   | 442   | 308   | 413   | 446   | Zfp109  |
| Zfp11   | 829   | 856   | 977   | 844   | 954   | 956   | 948   | 1010  | 957   | 839   | 866   | 920   | 855   | 832   | 940   | 735   | 897   | 869   | 877   | 1071  | 866   | 949   | 836   | 938   | 855   | 911   | 952   | 946   | Zfp11   |
| Zfp110  | 2942  | 2632  | 2779  | 2277  | 2824  | 2840  | 2948  | 3676  | 3414  | 2955  | 2806  | 2852  | 2761  | 2853  | 3005  | 2509  | 2728  | 2355  | 3010  | 3319  | 2792  | 2976  | 3443  | 3075  | 2880  | 2913  | 2962  | 2909  | Zfp110  |
| Zfp111  | 1311  | 1055  | 1332  | 1026  | 1198  | 1253  | 1240  | 2083  | 1941  | 1657  | 1976  | 2059  | 2005  | 2035  | 1146  | 1113  | 1177  | 1138  | 1148  | 1253  | 1220  | 1785  | 2065  | 1834  | 1894  | 1880  | 2223  | 2209  | Zfp111  |
| Zfp112  | 501   | 492   | 314   | 424   | 551   | 605   | 525   | 485   | 606   | 489   | 481   | 419   | 425   | 424   | 524   | 467   | 459   | 432   | 444   | 647   | 600   | 476   | 533   | 406   | 493   | 351   | 442   | 371   | Zfp112  |
| Zfp113  | 2874  | 2621  | 2866  | 2803  | 2788  | 2649  | 3070  | 4686  | 3752  | 3639  | 3614  | 4439  | 3948  | 4838  | 2900  | 2507  | 2939  | 2699  | 3010  | 3027  | 2943  | 3778  | 3676  | 4196  | 4503  | 3952  | 4756  | 4710  | Zfp113  |
| Zfp114  | 210   | 179   | 84    | 134   | 195   | 187   | 203   | 391   | 423   | 355   | 377   | 354   | 356   | 385   | 196   | 150   | 161   | 156   | 252   | 263   | 237   | 281   | 386   | 348   | 407   | 255   | 447   | 339   | Zfp114  |
| Zfp119a | 617   | 371   | 274   | 355   | 488   | 571   | 596   | 865   | 783   | 559   | 615   | 720   | 767   | 700   | 562   | 488   | 378   | 359   | 483   | 683   | 592   | 620   | 710   | 553   | 692   | 451   | 776   | 698   | Zfp119a |
| Zfp119b | 287   | 262   | 315   | 273   | 290   | 284   | 324   | 466   | 438   | 333   | 360   | 384   | 401   | 453   | 322   | 227   | 304   | 237   | 339   | 320   | 323   | 505   | 441   | 400   | 414   | 439   | 404   | 433   | Zfp119b |
| Zfp12   | 3173  | 3549  | 3441  | 3451  | 3437  | 3514  | 3361  | 4399  | 3864  | 3936  | 3605  | 3888  | 3657  | 3988  | 3129  | 3068  | 3356  | 3220  | 3536  | 3402  | 3600  | 4034  | 4043  | 4026  | 4087  | 3513  | 3780  | 3855  | Zfp12   |
| Zfp120  | 1525  | 1195  | 1656  | 1527  | 1664  | 1803  | 1943  | 1975  | 1561  | 1564  | 1356  | 1606  | 1471  | 1638  | 1858  | 1521  | 1662  | 1555  | 1698  | 2174  | 1761  | 1669  | 1639  | 1570  | 1644  | 1549  | 1567  | 1709  | Zfp120  |
| Zfp128  | 1151  | 1170  | 967   | 1047  | 1120  | 1152  | 1268  | 1611  | 1299  | 1380  | 1108  | 1163  | 1048  | 1219  | 1242  | 938   | 1148  | 1029  | 1262  | 1342  | 1297  | 1432  | 1331  | 1206  | 1411  | 1129  | 1167  | 1214  | Zfp128  |
| Zfp13   | 1614  | 1953  | 1900  | 1951  | 1794  | 1791  | 1563  | 1535  | 1786  | 2012  | 1977  | 2134  | 2021  | 1971  | 1524  | 1775  | 1889  | 1741  | 1964  | 1707  | 1659  | 1708  | 1576  | 1996  | 2028  | 2064  | 2030  | 1949  | Zfp13   |
| Zfp131  | 6381  | 5189  | 5602  | 5670  | 5399  | 5836  | 6357  | 7757  | 6163  | 5687  | 5453  | 6609  | 6074  | 7101  | 6472  | 5544  | 5567  | 5678  | 5695  | 6618  | 6195  | 6066  | 5873  | 6250  | 6386  | 6830  | 6580  | 6579  | Zfp131  |
| Zfp14   | 852   | 870   | 839   | 915   | 1007  | 979   | 1033  | 1139  | 984   | 1101  | 835   | 969   | 764   | 955   | 974   | 790   | 874   | 879   | 1100  | 1004  | 1075  | 1173  | 979   | 968   | 960   | 817   | 829   | 847   | Zfp14   |
| Zfp141  | 2400  | 1859  | 2246  | 2383  | 2680  | 2686  | 2806  | 2383  | 2149  | 2017  | 2035  | 2081  | 2106  | 2315  | 2407  | 2081  | 2395  | 2439  | 2607  | 2729  | 2525  | 2209  | 2110  | 2202  | 2134  | 2203  | 2107  | 2115  | Zfp141  |
| Zfp142  | 4236  | 5125  | 3822  | 5298  | 4642  | 4907  | 4449  | 2666  | 3001  | 3311  | 3151  | 3451  | 3196  | 3075  | 3938  | 4566  | 4225  | 4997  | 4648  | 4039  | 5042  | 2991  | 2581  | 3049  | 3436  | 2446  | 3331  | 3081  | Zfp142  |
| Zfp143  | 2970  | 2805  | 2837  | 2435  | 2202  | 2315  | 2786  | 2982  | 2663  | 2774  | 2271  | 3213  | 2626  | 3012  | 2900  | 2433  | 2680  | 2453  | 2576  | 2960  | 2575  | 2558  | 2405  | 2772  | 2543  | 3166  | 2986  | 3125  | Zfp143  |
| Zfp146  | 6414  | 6173  | 6282  | 5455  | 6018  | 5953  | 6223  | 10462 | 9788  | 8733  | 8141  | 10125 | 9738  | 10156 | 6434  | 6119  | 6289  | 5733  | 6260  | 7309  | 5922  | 8808  | 9236  | 9211  | 9314  | 11561 | 10656 | 10581 | Zfp146  |
| Zfp148  | 9471  | 7593  | 6485  | 7764  | 9085  | 9903  | 10502 | 12082 | 10827 | 9333  | 9868  | 10118 | 9424  | 10494 | 9643  | 8034  | 7392  | 7911  | 8676  | 10025 | 9945  | 9961  | 10423 | 9243  | 10105 | 8223  | 10235 | 10066 | Zfp148  |
| Zfp157  | 5224  | 4380  | 4242  | 4992  | 5533  | 5444  | 5833  | 9126  | 7359  | 6974  | 6540  | 6847  | 6561  | 7171  | 5898  | 4670  | 4826  | 4842  | 5376  | 6112  | 5655  | 8560  | 7244  | 6834  | 7715  | 5954  | 6943  | 6806  | Zfp157  |
| Zfp160  | 4071  | 2835  | 3694  | 3529  | 3599  | 4025  | 4205  | 4847  | 4237  | 3956  | 4136  | 4299  | 4160  | 4550  | 4019  | 3597  | 3530  | 3415  | 3741  | 4061  | 3869  | 4453  | 3932  | 4016  | 4128  | 4149  | 4364  | 4467  | Zfp160  |
| Zfp169  | 1311  | 1621  | 535   | 1373  | 1283  | 1408  | 1236  | 1070  | 970   | 857   | 912   | 766   | 816   | 908   | 1311  | 1208  | 992   | 1356  | 1227  | 1399  | 1537  | 983   | 940   | 725   | 991   | 254   | 992   | 805   | Zfp169  |
| Zfp174  | 830   | 792   | 507   | 684   | 776   | 816   | 734   | 702   | 663   | 609   | 559   | 459   | 550   | 425   | 857   | 750   | 552   | 694   | 626   | 833   | 784   | 618   | 683   | 484   | 570   | 416   | 497   | 417   | Zfp174  |
| Zfp180  | 2593  | 2591  | 2789  | 2604  | 3161  | 2674  | 2835  | 4247  | 3667  | 3521  | 3279  | 3826  | 3708  | 3820  | 2603  | 2366  | 2607  | 2487  | 3024  | 3079  | 2830  | 4044  | 3730  | 3802  | 3832  | 3868  | 3949  | 3780  | Zfp180  |
| Zfp182  | 1275  | 1113  | 1229  | 1483  | 1727  | 1709  | 1753  | 2351  | 1862  | 2058  | 1901  | 1729  | 1958  | 1924  | 1501  | 1285  | 1443  | 1405  | 1577  | 1713  | 1623  | 2212  | 1776  | 1880  | 1867  | 1527  | 1891  | 1728  | Zfp182  |
| Zfp184  | 2461  | 2193  | 1982  | 2145  | 1853  | 2013  | 2101  | 2481  | 2167  | 1964  | 1675  | 2284  | 2033  | 2229  | 2517  | 2107  | 2114  | 2130  | 2039  | 2478  | 2003  | 2027  | 2008  | 2176  | 2117  | 2439  | 2238  | 2187  | Zfp184  |
| Zfp185  | 771   | 588   | 527   | 385   | 205   | 583   | 211   | 653   | 827   | 598   | 1039  | 506   | 778   | 480   | 824   | 873   | 319   | 513   | 243   | 204   | 189   | 580   | 1218  | 498   | 398   | 468   | 494   | 516   | Zfp185  |
| Zfp189  | 2025  | 1933  | 1832  | 1968  | 1958  | 1960  | 2086  | 2004  | 1554  | 1476  | 1351  | 1461  | 1499  | 1487  | 2210  | 1938  | 1936  | 1970  | 1862  | 2388  | 1984  | 1683  | 1551  |       |       |       |       |       |         |



|         |       |       |       |       |       |       |       |       |       |       |       |       |       |       |       |       |       |       |       |       |       |       |       |       |       |       |       |       |         |
|---------|-------|-------|-------|-------|-------|-------|-------|-------|-------|-------|-------|-------|-------|-------|-------|-------|-------|-------|-------|-------|-------|-------|-------|-------|-------|-------|-------|-------|---------|
| Zfp292  | 12980 | 10172 | 6583  | 9374  | 10512 | 12647 | 12320 | 23132 | 18743 | 15402 | 14683 | 16986 | 15842 | 17325 | 13842 | 10573 | 8357  | 8604  | 10319 | 14783 | 12122 | 15299 | 17189 | 13569 | 17005 | 10255 | 18928 | 15957 | Zfp292  |
| Zfp296  | 24    | 29    | 62    | 14    | 20    | 4     | 12    | 33    | 26    | 42    | 19    | 29    | 22    | 27    | 9     | 19    | 24    | 26    | 21    | 19    | 13    | 30    | 32    | 44    | 31    | 33    | 35    | 19    | Zfp296  |
| Zfp3    | 685   | 650   | 686   | 777   | 814   | 778   | 742   | 805   | 670   | 762   | 702   | 846   | 725   | 724   | 728   | 594   | 686   | 728   | 768   | 745   | 825   | 810   | 707   | 706   | 753   | 586   | 716   | 741   | Zfp3    |
| Zfp30   | 1741  | 1664  | 1706  | 1855  | 2047  | 1925  | 1994  | 1690  | 1550  | 1774  | 1629  | 1701  | 1500  | 1628  | 1691  | 1478  | 1781  | 1787  | 2209  | 1931  | 2060  | 1860  | 1562  | 1800  | 1746  | 1612  | 1592  | 1557  | Zfp30   |
| Zfp300  | 429   | 353   | 375   | 399   | 583   | 570   | 562   | 525   | 465   | 454   | 365   | 382   | 401   | 380   | 492   | 378   | 415   | 425   | 401   | 614   | 541   | 463   | 434   | 287   | 356   | 284   | 353   | 377   | Zfp300  |
| Zfp316  | 2781  | 3609  | 4214  | 4763  | 4566  | 4054  | 4021  | 3482  | 3989  | 4786  | 4222  | 4740  | 4106  | 4457  | 2952  | 3012  | 5076  | 4768  | 5071  | 3480  | 4295  | 4687  | 3625  | 5149  | 5374  | 4347  | 4338  | 4348  | Zfp316  |
| Zfp317  | 4592  | 4363  | 4058  | 4328  | 4675  | 4559  | 5026  | 6544  | 5675  | 5382  | 5074  | 5681  | 5372  | 5902  | 5003  | 4470  | 4403  | 4483  | 4493  | 5127  | 4970  | 5803  | 5541  | 5476  | 5810  | 5323  | 5839  | 5518  | Zfp317  |
| Zfp318  | 9172  | 7871  | 6845  | 8444  | 9717  | 9839  | 9659  | 9646  | 8596  | 9050  | 9385  | 8826  | 9088  | 9032  | 9171  | 8495  | 7903  | 8176  | 8859  | 8809  | 10034 | 9722  | 8231  | 7852  | 9805  | 5943  | 8685  | 8693  | Zfp318  |
| Zfp319  | 3697  | 4686  | 5243  | 6531  | 6313  | 5340  | 5123  | 4043  | 4285  | 5377  | 4719  | 5277  | 4458  | 4815  | 3927  | 4157  | 6311  | 6571  | 6987  | 4187  | 5952  | 6109  | 3961  | 5592  | 5763  | 5048  | 4430  | 4948  | Zfp319  |
| Zfp322a | 9185  | 7671  | 8502  | 8700  | 7927  | 8235  | 9397  | 8529  | 6943  | 6512  | 6793  | 7022  | 6922  | 7244  | 9090  | 9134  | 8281  | 8353  | 6949  | 9403  | 8592  | 7046  | 6800  | 6987  | 7298  | 6781  | 6995  | 7376  | Zfp322a |
| Zfp324  | 2348  | 2795  | 2290  | 2710  | 2534  | 2454  | 2496  | 2130  | 2144  | 1948  | 2157  | 1832  | 1814  | 1947  | 2474  | 2326  | 2606  | 2574  | 2608  | 2510  | 2598  | 2117  | 2058  | 1923  | 2040  | 1601  | 1765  | 1918  | Zfp324  |
| Zfp326  | 6608  | 4736  | 6721  | 6084  | 5939  | 6227  | 6876  | 8675  | 7449  | 7491  | 8094  | 8486  | 8653  | 9762  | 6367  | 5344  | 6107  | 5454  | 5995  | 6384  | 6060  | 7984  | 7041  | 8419  | 8531  | 8350  | 8929  | 9517  | Zfp326  |
| Zfp329  | 6330  | 4769  | 4969  | 5780  | 6431  | 7322  | 7201  | 8672  | 7035  | 6957  | 6602  | 6839  | 6878  | 7694  | 6521  | 5382  | 5205  | 5654  | 6072  | 6825  | 7479  | 7536  | 6644  | 6480  | 7809  | 4952  | 7554  | 7005  | Zfp329  |
| Zfp330  | 4523  | 4241  | 4328  | 4385  | 3724  | 3914  | 4040  | 5258  | 4484  | 4173  | 4005  | 4573  | 4276  | 4672  | 4797  | 4511  | 4461  | 4090  | 3967  | 4428  | 3824  | 4291  | 4411  | 4615  | 4186  | 4837  | 4682  | 4906  | Zfp330  |
| Zfp334  | 5218  | 5175  | 5309  | 5180  | 4928  | 5421  | 4998  | 6592  | 6054  | 6443  | 5676  | 7444  | 7058  | 7368  | 5102  | 4689  | 5482  | 4718  | 5723  | 4905  | 5101  | 6316  | 5652  | 6596  | 6780  | 6696  | 8344  | 7752  | Zfp334  |
| Zfp335  | 1538  | 1968  | 1659  | 2032  | 2181  | 1895  | 1799  | 2271  | 2886  | 3123  | 2776  | 3354  | 2784  | 2629  | 1449  | 1680  | 1820  | 2040  | 2258  | 1722  | 1804  | 3080  | 2669  | 3102  | 3100  | 2836  | 2739  | 2497  | Zfp335  |
| Zfp341  | 113   | 136   | 198   | 208   | 295   | 192   | 171   | 658   | 854   | 922   | 824   | 871   | 705   | 808   | 131   | 161   | 196   | 254   | 241   | 153   | 236   | 946   | 744   | 981   | 1010  | 1013  | 757   | 711   | Zfp341  |
| Zfp345  | 1     | 3     | 2     | 5     | 7     | 4     | 2     | 1     | 9     | 10    | 8     | 1     | 10    | 3     | 8     | 2     | 1     | 11    | 10    | 9     | 8     | 3     | 14    | 2     | 2     | 1     | 14    | 1     | Zfp345  |
| Zfp346  | 4555  | 5075  | 4317  | 4571  | 3925  | 4283  | 4329  | 2610  | 2810  | 2626  | 2969  | 2824  | 2941  | 2627  | 4603  | 4597  | 4187  | 4579  | 4216  | 4130  | 4174  | 2734  | 2876  | 2765  | 2693  | 2896  | 2775  | 2677  | Zfp346  |
| Zfp35   | 3098  | 2961  | 2667  | 2420  | 2606  | 2588  | 2778  | 4040  | 3708  | 2084  | 2447  | 3069  | 2891  | 2930  | 3282  | 2914  | 2656  | 2469  | 2465  | 3356  | 2752  | 3106  | 3150  | 2882  | 2859  | 3407  | 3039  | 3090  | Zfp35   |
| Zfp352  | 0     | 0     | 0     | 1     | 0     | 0     | 0     | 0     | 0     | 0     | 0     | 0     | 0     | 0     | 0     | 0     | 0     | 0     | 0     | 0     | 0     | 0     | 1     | 0     | 0     | 0     | 0     | 0     | Zfp352  |
| Zfp354a | 1113  | 966   | 1091  | 1192  | 1313  | 1248  | 1179  | 1446  | 1221  | 1110  | 1241  | 1113  | 1140  | 1105  | 1221  | 1060  | 1162  | 1201  | 1222  | 1270  | 1213  | 1409  | 1225  | 1222  | 1355  | 1068  | 1154  | 1194  | Zfp354a |
| Zfp354b | 234   | 243   | 225   | 231   | 331   | 349   | 278   | 300   | 243   | 216   | 222   | 203   | 155   | 187   | 297   | 251   | 216   | 300   | 281   | 329   | 311   | 304   | 237   | 219   | 233   | 185   | 180   | 160   | Zfp354b |
| Zfp354c | 10942 | 8854  | 8082  | 10174 | 11734 | 12006 | 12247 | 12469 | 10729 | 10429 | 11552 | 9454  | 9417  | 9924  | 11041 | 9436  | 9749  | 10953 | 11162 | 11538 | 12619 | 11528 | 10736 | 9992  | 11339 | 8198  | 9490  | 9702  | Zfp354c |
| Zfp358  | 2057  | 2522  | 2011  | 1881  | 2153  | 1925  | 1997  | 3480  | 3459  | 3327  | 2878  | 3224  | 3034  | 3264  | 2025  | 1843  | 2232  | 1625  | 2342  | 2106  | 2080  | 3405  | 3190  | 3496  | 3153  | 3494  | 3400  | 3208  | Zfp358  |
| Zfp36   | 355   | 477   | 389   | 387   | 328   | 349   | 292   | 209   | 363   | 401   | 368   | 336   | 356   | 279   | 327   | 495   | 335   | 482   | 345   | 244   | 297   | 307   | 388   | 382   | 275   | 401   | 244   | 259   | Zfp36   |
| Zfp362  | 2461  | 2801  | 4070  | 3282  | 3614  | 3047  | 2558  | 4388  | 5526  | 6771  | 6263  | 7797  | 6289  | 6670  | 2273  | 2540  | 3964  | 2835  | 3841  | 2299  | 2716  | 6370  | 5022  | 7654  | 6798  | 9201  | 6306  | 6547  | Zfp362  |
| Zfp365  | 573   | 447   | 508   | 429   | 586   | 497   | 504   | 375   | 391   | 437   | 417   | 530   | 517   | 474   | 493   | 526   | 599   | 568   | 517   | 395   | 523   | 418   | 432   | 452   | 464   | 487   | 473   | 494   | Zfp365  |
| Zfp366  | 227   | 234   | 374   | 240   | 401   | 323   | 275   | 419   | 476   | 515   | 525   | 508   | 557   | 500   | 229   | 241   | 219   | 305   | 403   | 352   | 355   | 592   | 515   | 538   | 502   | 471   | 476   | 483   | Zfp366  |
| Zfp367  | 3493  | 2503  | 3330  | 3071  | 2476  | 2721  | 3305  | 2199  | 2203  | 1958  | 1791  | 2917  | 2403  | 3069  | 3212  | 2798  | 3094  | 2937  | 2586  | 3070  | 2894  | 1693  | 1924  | 2595  | 2137  | 3202  | 2931  | 3030  | Zfp367  |
| Zfp369  | 2654  | 2153  | 2850  | 2491  | 2839  | 2872  | 2596  | 3690  | 3395  | 3042  | 3349  | 3327  | 3295  | 2750  | 2719  | 2325  | 2847  | 2600  | 3055  | 2875  | 2437  | 3457  | 3029  | 3086  | 3341  | 3332  | 3241  | 2651  | Zfp369  |
| Zfp361i | 9372  | 7988  | 14142 | 10566 | 7733  | 7221  | 7558  | 11176 | 11426 | 11384 | 13436 | 14144 | 13681 | 14422 | 8375  | 9584  | 11596 | 9198  | 8257  | 6742  | 7780  | 10664 | 12835 | 14296 | 10473 | 19436 | 13323 | 16154 | Zfp361i |
| Zfp3612 | 2646  | 2480  | 3307  | 2554  | 2143  | 2184  | 1780  | 2964  | 3385  | 3001  | 3773  | 3230  | 3773  | 2446  | 2541  | 3195  | 2629  | 2593  | 1858  | 1629  | 1779  | 3228  | 3587  | 3381  | 2666  | 4092  | 3069  | 3350  | Zfp3612 |
| Zfp3613 | 3     | 1     | 2     | 1     | 0     | 1     | 1     | 0     | 0     | 2     | 0     | 2     | 0     | 2     | 0     | 0     | 1     | 1     | 1     | 1     | 0     | 0     | 1     | 2     | 0     | 0     | 1     | 0     | Zfp3613 |
| Zfp37   | 2392  | 1935  | 2591  | 2200  | 2669  | 2460  | 2464  | 4063  | 3210  | 3262  | 3029  | 3460  | 3538  | 3413  | 2685  | 2118  | 2423  | 2183  | 2660  | 2907  | 2220  | 4092  | 3205  | 3368  | 3298  | 3359  | 3782  | 3548  | Zfp37   |
| Zfp382  | 801   | 878   | 322   | 787   | 817   | 830   | 891   | 723   | 712   | 714   | 583   | 613   | 623   | 712   | 816   | 791   | 509   | 763   | 782   | 787   | 886   | 608   | 627   | 479   | 652   | 139   | 676   | 500   | Zfp382  |
| Zfp383  | 2222  | 1842  | 2157  | 2232  | 2428  | 2214  | 2500  | 3920  | 3522  | 3535  | 3818  | 3668  | 3772  | 4053  | 2338  | 1902  | 2370  | 2163  | 2387  | 2428  | 2480  | 4114  | 3603  | 3939  | 3910  | 3774  | 4007  | 3870  | Zfp383  |
| Zfp384  | 4081  | 4372  | 3973  | 4329  | 4561  | 4586  | 4427  | 6036  | 6171  | 6562  | 6422  | 6574  | 5877  | 6178  | 4189  | 3776  | 4344  | 4255  | 4671  | 4118  | 4533  | 6911  | 5795  | 6427  | 6474  | 6119  | 5950  | 5838  | Zfp384  |
| Zfp385a | 3790  | 5212  | 6211  | 5395  | 4656  | 4179  | 3454  | 2105  | 2335  | 2687  | 2689  | 3001  | 2701  | 2591  | 3614  | 4388  | 5839  | 4884  | 5179  | 3159  | 4036  | 2887  | 2426  | 3001  | 2605  | 3232  | 2635  | 2838  | Zfp385a |
| Zfp385b | 140   | 128   | 129   | 194   | 231   | 215   | 199   | 199   | 274   | 303   | 419   | 186   | 158   | 176   | 148   | 111   | 146   | 179   | 227   | 154   | 186   | 376   | 304   | 305   | 242   | 186   | 179   | 209   | Zfp385b |
| Zfp385c | 52    | 47    | 23    | 15    | 26    | 25    | 17    | 45    | 58    | 32    | 48    | 24    | 18    | 20    | 32    | 35    | 21    | 17    | 23    | 14    | 12    | 40    | 32    | 29    | 27    | 36    | 16    | 6     | Zfp385c |
| Zfp386  | 4486  | 3334  | 3538  | 3600  | 3833  | 4379  | 4273  | 5199  | 4500  | 4410  | 4060  | 4773  | 4478  | 4375  | 4709  | 3924  | 3736  | 3554  | 3881  | 4966  | 4279  | 4505  | 4467  | 4204  | 4229  | 4610  | 4835  | 4421  | Zfp386  |
| Zfp39   | 1333  | 1252  | 1168  | 1332  | 996   | 1146  | 1315  | 1147  | 1160  | 1027  | 1010  | 1109  | 978   | 1024  | 1374  | 1140  | 1016  | 1140  | 990   | 1175  | 1086  | 1156  | 1040  | 1136  | 1025  | 1165  | 952   | 1013  | Zfp39   |
| Zfp395  | 3301  | 3059  | 3863  | 3449  | 2455  | 2675  | 2249  | 1663  | 2398  | 2289  | 2834  | 2703  | 2185  | 1960  | 2569  | 3667  | 3333  | 3316  | 2817  | 1962  | 2409  | 1990  | 2386  | 2354  | 1753  | 2657  | 1863  | 2086  | Zfp395  |
| Zfp397  | 12243 | 9827  | 8852  | 9865  | 10131 | 11909 | 12260 | 13842 | 11372 | 11344 | 11053 | 12906 | 12264 | 13915 | 12159 | 10641 | 8894  | 9673  | 9902  | 11647 | 12068 | 11306 | 11084 | 10753 | 12151 | 9488  | 12921 | 12462 | Zfp397  |
| Zfp398  | 5106  | 4488  | 3057  | 4432  | 4874  | 5219  | 5370  | 4621  | 4252  | 3995  | 4103  | 3503  | 3655  | 3686  | 5167  | 4414  | 3888  | 4385  | 4517  | 5317  | 5606  | 4461  | 3857  | 3486  | 4356  | 2421  | 3671  | 3566  | Zfp398  |
| Zfp40   | 2846  | 2230  | 3097  | 3103  | 3550  | 3493  | 3686  | 3377  | 2898  | 3231  | 2808  | 3052  | 2639  | 3076  | 2934  | 2522  | 3160  | 3297  | 3451  | 3566  | 3479  | 3603  | 2698  | 2872  |       |       |       |       |         |

|         |      |      |      |      |       |       |       |       |       |       |       |       |       |       |       |      |       |      |       |       |       |       |       |       |       |       |       |        |         |
|---------|------|------|------|------|-------|-------|-------|-------|-------|-------|-------|-------|-------|-------|-------|------|-------|------|-------|-------|-------|-------|-------|-------|-------|-------|-------|--------|---------|
| Zfp473  | 400  | 356  | 368  | 235  | 206   | 222   | 209   | 245   | 238   | 210   | 197   | 263   | 213   | 270   | 357   | 300  | 321   | 209  | 249   | 277   | 216   | 172   | 230   | 267   | 221   | 296   | 303   | 297    | Zfp473  |
| Zfp474  | 3    | 5    | 0    | 2    | 9     | 0     | 1     | 12    | 17    | 19    | 14    | 14    | 32    | 1     | 4     | 9    | 3     | 1    | 5     | 7     | 4     | 23    | 28    | 3     | 11    | 5     | 5     | 6      | Zfp474  |
| Zfp488  | 131  | 126  | 98   | 79   | 106   | 124   | 55    | 67    | 92    | 78    | 82    | 33    | 60    | 36    | 108   | 178  | 119   | 101  | 92    | 82    | 79    | 82    | 92    | 65    | 70    | 35    | 29    | 34     | Zfp488  |
| Zfp493  | 631  | 619  | 674  | 556  | 677   | 615   | 615   | 551   | 479   | 447   | 470   | 447   | 458   | 471   | 733   | 670  | 576   | 598  | 577   | 637   | 557   | 426   | 496   | 429   | 432   | 440   | 393   | 515    | Zfp493  |
| Zfp503  | 2802 | 2491 | 4248 | 2920 | 3027  | 2259  | 2321  | 3055  | 3114  | 3325  | 4595  | 2763  | 3166  | 2836  | 2739  | 2307 | 3306  | 2603 | 2809  | 1768  | 2505  | 3115  | 3674  | 3161  | 2539  | 3143  | 2626  | 2959   | Zfp503  |
| Zfp507  | 4749 | 4292 | 3577 | 3860 | 3941  | 4387  | 4199  | 5490  | 5583  | 5256  | 5462  | 5801  | 5551  | 5659  | 4425  | 4101 | 3918  | 3752 | 3909  | 4063  | 4332  | 4659  | 5277  | 5234  | 5239  | 4295  | 5724  | 5577   | Zfp507  |
| Zfp51   | 771  | 553  | 686  | 657  | 661   | 712   | 700   | 1186  | 928   | 899   | 652   | 872   | 874   | 864   | 803   | 731  | 620   | 609  | 701   | 874   | 680   | 976   | 1010  | 855   | 789   | 896   | 729   | 879    | Zfp51   |
| Zfp511  | 836  | 1037 | 1105 | 1062 | 1057  | 940   | 1029  | 1188  | 1213  | 1379  | 1317  | 1429  | 1262  | 1402  | 795   | 863  | 1169  | 941  | 1088  | 924   | 995   | 1348  | 1186  | 1521  | 1424  | 1534  | 1319  | 1304   | Zfp511  |
| Zfp512  | 6614 | 6701 | 7195 | 7891 | 8093  | 7759  | 8042  | 9424  | 8655  | 9294  | 8559  | 9484  | 8523  | 9594  | 7806  | 5948 | 7645  | 7630 | 7849  | 7838  | 8105  | 9979  | 8242  | 9386  | 9830  | 8975  | 9209  | 9193   | Zfp512  |
| Zfp512b | 7022 | 7415 | 7952 | 9502 | 10725 | 10162 | 9183  | 10247 | 11810 | 13703 | 13344 | 13009 | 11932 | 11636 | 6004  | 7013 | 9027  | 9756 | 10460 | 8315  | 9513  | 13832 | 11072 | 13348 | 14026 | 11805 | 11656 | 10987  | Zfp512b |
| Zfp513  | 1052 | 1195 | 1261 | 1332 | 1349  | 1236  | 1157  | 1546  | 1763  | 1973  | 1828  | 2139  | 1926  | 1872  | 965   | 893  | 1416  | 1296 | 1382  | 1159  | 1186  | 1883  | 1652  | 2000  | 1913  | 2291  | 1937  | 1875   | Zfp513  |
| Zfp516  | 8947 | 9528 | 9474 | 9727 | 8826  | 8498  | 8030  | 3979  | 4818  | 4884  | 5207  | 5589  | 5248  | 5100  | 7762  | 9111 | 10020 | 9376 | 9696  | 7507  | 8370  | 4069  | 4536  | 5425  | 4531  | 5218  | 4928  | 5040   | Zfp516  |
| Zfp518a | 2841 | 1868 | 2154 | 2047 | 2423  | 2443  | 2432  | 4667  | 4280  | 3773  | 3678  | 4322  | 4384  | 4130  | 2772  | 2229 | 2170  | 1817 | 2390  | 2819  | 2364  | 3561  | 4233  | 3650  | 3483  | 3294  | 4416  | 4081   | Zfp518a |
| Zfp518b | 5891 | 5284 | 5871 | 6216 | 7348  | 7201  | 7201  | 9649  | 9039  | 10025 | 9259  | 11031 | 10401 | 11490 | 5480  | 5254 | 5947  | 6113 | 7337  | 6236  | 7356  | 10059 | 8307  | 10160 | 11231 | 8223  | 11338 | 11337  | Zfp518b |
| Zfp52   | 660  | 464  | 665  | 527  | 583   | 710   | 601   | 347   | 368   | 309   | 360   | 265   | 348   | 285   | 616   | 674  | 421   | 585  | 577   | 616   | 517   | 289   | 349   | 336   | 317   | 300   | 285   | 241    | Zfp52   |
| Zfp521  | 3907 | 4102 | 4049 | 3813 | 4342  | 4422  | 3803  | 7155  | 7761  | 7805  | 7454  | 7500  | 8852  | 7341  | 4168  | 4314 | 3970  | 3861 | 3930  | 3784  | 3554  | 7992  | 7586  | 7363  | 7320  | 7391  | 7553  | 7861   | Zfp521  |
| Zfp523  | 2249 | 2827 | 2830 | 3192 | 3571  | 3104  | 2615  | 3324  | 3886  | 4447  | 3922  | 4449  | 4165  | 3739  | 2359  | 2425 | 3281  | 3166 | 3559  | 2647  | 2890  | 4286  | 3599  | 4243  | 4294  | 4669  | 4206  | 3607   | Zfp523  |
| Zfp524  | 16   | 44   | 34   | 40   | 34    | 34    | 36    | 59    | 72    | 77    | 95    | 85    | 105   | 65    | 32    | 24   | 42    | 47   | 44    | 43    | 51    | 50    | 78    | 83    | 76    | 91    | 65    | 66     | Zfp524  |
| Zfp526  | 959  | 1104 | 1339 | 1075 | 893   | 926   | 850   | 808   | 887   | 958   | 989   | 1087  | 1017  | 1001  | 778   | 929  | 1119  | 1099 | 991   | 726   | 878   | 934   | 937   | 1068  | 1052  | 908   | 955   | 915    | Zfp526  |
| Zfp53   | 1135 | 929  | 1030 | 940  | 907   | 972   | 1104  | 868   | 812   | 740   | 770   | 811   | 787   | 777   | 1098  | 895  | 890   | 945  | 962   | 1042  | 960   | 747   | 812   | 770   | 676   | 718   | 686   | 774    | Zfp53   |
| Zfp532  | 3715 | 3709 | 4206 | 4001 | 5026  | 4684  | 4075  | 10815 | 11814 | 13404 | 11515 | 13563 | 12529 | 12089 | 3779  | 3566 | 4609  | 3609 | 5306  | 4268  | 4226  | 12746 | 10389 | 12957 | 13743 | 11035 | 12595 | 12221  | Zfp532  |
| Zfp534  | 0    | 2    | 4    | 7    | 0     | 3     | 1     | 1     | 3     | 1     | 1     | 3     | 3     | 0     | 3     | 5    | 2     | 2    | 2     | 0     | 1     | 3     | 1     | 0     | 1     | 0     | 0     | 1      | Zfp534  |
| Zfp536  | 2150 | 2547 | 3828 | 4634 | 5122  | 4555  | 4361  | 2757  | 3019  | 4494  | 3520  | 4323  | 3875  | 4201  | 2648  | 2347 | 4253  | 4414 | 4807  | 3298  | 4324  | 4289  | 2775  | 3742  | 4581  | 3479  | 3934  | 4006   | Zfp536  |
| Zfp54   | 250  | 179  | 270  | 200  | 337   | 330   | 324   | 264   | 305   | 280   | 274   | 239   | 253   | 243   | 297   | 234  | 268   | 223  | 249   | 264   | 228   | 281   | 298   | 232   | 221   | 246   | 228   | Zfp54  |         |
| Zfp541  | 13   | 27   | 12   | 13   | 34    | 29    | 27    | 7     | 17    | 16    | 22    | 12    | 9     | 5     | 15    | 22   | 20    | 40   | 23    | 20    | 20    | 13    | 21    | 9     | 14    | 3     | 6     | 8      | Zfp541  |
| Zfp551  | 309  | 282  | 154  | 275  | 488   | 407   | 335   | 761   | 622   | 573   | 518   | 467   | 488   | 411   | 284   | 172  | 253   | 224  | 401   | 471   | 390   | 685   | 610   | 422   | 538   | 220   | 433   | 349    | Zfp551  |
| Zfp553  | 2708 | 3203 | 4499 | 4140 | 4091  | 3662  | 3422  | 3375  | 3603  | 4680  | 4484  | 5303  | 4501  | 5296  | 2499  | 2900 | 4515  | 3876 | 4527  | 2834  | 3766  | 4306  | 3482  | 5363  | 5191  | 6263  | 4871  | 5504   | Zfp553  |
| Zfp558  | 1480 | 1304 | 1117 | 1625 | 2311  | 2243  | 2272  | 3184  | 2851  | 2919  | 2519  | 2502  | 2088  | 2482  | 1577  | 1211 | 1403  | 1811 | 1993  | 2150  | 2031  | 3501  | 2698  | 2317  | 3312  | 1771  | 2377  | 2176   | Zfp558  |
| Zfp560  | 814  | 625  | 777  | 747  | 1190  | 1121  | 1168  | 1856  | 1795  | 1729  | 1785  | 1568  | 1694  | 1725  | 854   | 710  | 829   | 847  | 1029  | 1002  | 995   | 1977  | 1526  | 1679  | 1877  | 1426  | 1576  | 1582   | Zfp560  |
| Zfp563  | 1742 | 1475 | 1572 | 1546 | 2044  | 2178  | 2204  | 3352  | 2811  | 2568  | 2487  | 2294  | 2121  | 2401  | 1929  | 1463 | 1577  | 1615 | 1879  | 2399  | 2235  | 3133  | 2699  | 2437  | 2878  | 2012  | 2316  | 2243   | Zfp563  |
| Zfp566  | 593  | 526  | 597  | 573  | 476   | 477   | 581   | 706   | 564   | 624   | 648   | 764   | 616   | 733   | 546   | 551  | 579   | 500  | 519   | 553   | 570   | 750   | 550   | 719   | 763   | 720   | 686   | 756    | Zfp566  |
| Zfp568  | 5285 | 4534 | 3656 | 3258 | 2832  | 3176  | 2538  | 3013  | 3041  | 2768  | 4265  | 3026  | 3614  | 2891  | 4080  | 5072 | 3322  | 3027 | 2579  | 2701  | 2686  | 2665  | 3703  | 2573  | 2444  | 2426  | 3491  | 3174   | Zfp568  |
| Zfp57   | 6174 | 5372 | 5977 | 7300 | 11547 | 9292  | 9874  | 17039 | 15592 | 18715 | 16688 | 15603 | 13899 | 16715 | 6446  | 5351 | 7258  | 7806 | 9685  | 8966  | 9501  | 21231 | 14637 | 17808 | 20211 | 13968 | 13796 | 13944  | Zfp57   |
| Zfp574  | 1450 | 1938 | 2056 | 2262 | 1816  | 1596  | 1368  | 1456  | 1705  | 1880  | 1847  | 2236  | 1831  | 1868  | 1353  | 1798 | 2155  | 2078 | 1926  | 1326  | 1630  | 1910  | 1633  | 2063  | 1885  | 2264  | 1805  | 1841   | Zfp574  |
| Zfp575  | 161  | 171  | 194  | 246  | 321   | 263   | 202   | 239   | 274   | 284   | 316   | 212   | 200   | 143   | 161   | 164  | 233   | 298  | 252   | 175   | 231   | 296   | 258   | 258   | 326   | 221   | 143   | 172    | Zfp575  |
| Zfp579  | 2184 | 2920 | 3045 | 3473 | 3377  | 3056  | 2777  | 2539  | 2811  | 3512  | 3178  | 3471  | 3108  | 3351  | 2167  | 2254 | 3588  | 3463 | 3850  | 2485  | 2927  | 3952  | 2557  | 3852  | 3670  | 3726  | 3396  | 3239   | Zfp579  |
| Zfp58   | 641  | 542  | 586  | 546  | 554   | 486   | 574   | 587   | 466   | 510   | 534   | 513   | 492   | 526   | 622   | 541  | 546   | 528  | 591   | 555   | 571   | 460   | 481   | 508   | 522   | 457   | 556   | 511    | Zfp58   |
| Zfp580  | 1085 | 1071 | 1364 | 1458 | 1393  | 1094  | 1167  | 933   | 860   | 1167  | 1031  | 1074  | 897   | 1157  | 953   | 801  | 1384  | 1228 | 1377  | 1038  | 1306  | 1063  | 893   | 1180  | 1175  | 1142  | 987   | 1100   | Zfp580  |
| Zfp583  | 403  | 365  | 374  | 381  | 483   | 402   | 485   | 950   | 864   | 865   | 851   | 759   | 753   | 822   | 425   | 386  | 380   | 373  | 431   | 408   | 427   | 979   | 780   | 830   | 913   | 761   | 807   | 784    | Zfp583  |
| Zfp59   | 1768 | 1524 | 1650 | 1518 | 1769  | 1728  | 1751  | 1856  | 1676  | 1633  | 1537  | 1724  | 1762  | 1693  | 1854  | 1671 | 1570  | 1607 | 1569  | 1871  | 1528  | 1636  | 1733  | 1606  | 1717  | 1726  | 1764  | 1720   | Zfp59   |
| Zfp592  | 2186 | 2139 | 2391 | 2416 | 3112  | 2802  | 2522  | 3379  | 3706  | 4096  | 4273  | 4373  | 4080  | 4088  | 1985  | 2433 | 2487  | 2590 | 3008  | 2189  | 2508  | 4679  | 3667  | 4156  | 4223  | 3531  | 3811  | 4093   | Zfp592  |
| Zfp593  | 1107 | 1462 | 1356 | 1251 | 978   | 1064  | 1063  | 572   | 673   | 582   | 663   | 649   | 730   | 688   | 1088  | 1294 | 1451  | 1231 | 1113  | 1098  | 1021  | 515   | 650   | 738   | 731   | 965   | 764   | 724    | Zfp593  |
| Zfp595  | 457  | 322  | 282  | 295  | 358   | 359   | 399   | 707   | 680   | 563   | 589   | 590   | 616   | 528   | 423   | 401  | 330   | 291  | 344   | 448   | 395   | 583   | 684   | 494   | 502   | 501   | 542   | 487    | Zfp595  |
| Zfp597  | 2103 | 1953 | 1770 | 2253 | 2495  | 2522  | 2496  | 2920  | 2317  | 2315  | 2242  | 2282  | 2141  | 2322  | 2229  | 2083 | 2021  | 2304 | 2184  | 2637  | 2543  | 2406  | 2087  | 2667  | 1694  | 2323  | 2243  | Zfp597 |         |
| Zfp598  | 4726 | 6215 | 6491 | 6527 | 5635  | 5102  | 5068  | 3700  | 4232  | 4917  | 4562  | 4980  | 4420  | 4333  | 4238  | 5544 | 6334  | 6050 | 6086  | 4676  | 4965  | 4430  | 3957  | 5301  | 4768  | 5571  | 4627  | 4551   | Zfp598  |
| Zfp599  | 1096 | 883  | 970  | 848  | 1001  | 1116  | 1215  | 1164  | 1000  | 998   | 852   | 931   | 920   | 974   | 1108  | 1009 | 956   | 930  | 1148  | 1314  | 1159  | 994   | 978   | 956   | 1014  | 917   | 989   | 968    | Zfp599  |
| Zfp60   | 9239 | 8109 | 8614 | 9351 | 10919 | 10937 | 11734 | 16617 | 12788 | 12822 | 11520 | 13495 | 11863 | 14155 | 10787 | 8502 | 9943  | 9599 | 10668 | 12124 | 11075 | 14999 | 12387 | 12351 | 14655 | 11088 | 13089 | 12907  | Zfp60   |
| Zfp600  | 0    | 1    | 6    | 0    | 2     | 0     | 0     | 1     | 1     | 0     | 0     | 0     | 0     | 0     | 1</   |      |       |      |       |       |       |       |       |       |       |       |       |        |         |

|         |       |       |       |       |       |       |       |       |       |       |       |       |       |       |       |       |       |       |       |       |       |       |       |       |       |       |       |       |         |
|---------|-------|-------|-------|-------|-------|-------|-------|-------|-------|-------|-------|-------|-------|-------|-------|-------|-------|-------|-------|-------|-------|-------|-------|-------|-------|-------|-------|-------|---------|
| Zfp654  | 4445  | 3539  | 3476  | 4711  | 3944  | 4621  | 4632  | 3793  | 3263  | 2959  | 3191  | 3232  | 3111  | 3316  | 4577  | 4491  | 3729  | 4492  | 3790  | 4212  | 4590  | 3568  | 3181  | 3045  | 3419  | 2507  | 3452  | 3274  | Zfp654  |
| Zfp655  | 4684  | 4084  | 3626  | 3910  | 3464  | 3763  | 3796  | 4645  | 3594  | 3215  | 3127  | 3254  | 3315  | 3303  | 4937  | 4505  | 3394  | 4011  | 3311  | 4363  | 3747  | 3653  | 3728  | 3072  | 3479  | 3302  | 3526  | 3253  | Zfp655  |
| Zfp658  | 1160  | 1293  | 1313  | 1433  | 1438  | 1333  | 1405  | 1607  | 1319  | 1323  | 1310  | 1412  | 1174  | 1461  | 1175  | 1108  | 1467  | 1368  | 1453  | 1308  | 1414  | 1738  | 1384  | 1587  | 1367  | 1367  | 1391  | 1368  | Zfp658  |
| Zfp661  | 1679  | 1749  | 1469  | 1552  | 1556  | 1513  | 1690  | 1319  | 1128  | 1189  | 1129  | 1261  | 1106  | 1138  | 1689  | 1637  | 1614  | 1533  | 1566  | 1595  | 1459  | 1218  | 1141  | 1177  | 1267  | 1080  | 1232  | 1240  | Zfp661  |
| Zfp663  | 939   | 1198  | 1131  | 1252  | 1248  | 1135  | 1134  | 1027  | 921   | 974   | 887   | 991   | 985   | 1043  | 1230  | 962   | 1330  | 1193  | 1233  | 1224  | 1125  | 1245  | 772   | 1045  | 1133  | 902   | 963   | 951   | Zfp663  |
| Zfp664  | 24120 | 22965 | 24812 | 22483 | 21298 | 21511 | 22914 | 23250 | 18582 | 20690 | 18410 | 24892 | 23200 | 24969 | 24062 | 20770 | 24404 | 21532 | 22977 | 21693 | 22876 | 20732 | 17860 | 22670 | 22515 | 25117 | 25134 | 26304 | Zfp664  |
| Zfp667  | 3579  | 3410  | 3407  | 3706  | 3217  | 3444  | 3557  | 1992  | 1538  | 1514  | 1388  | 1461  | 1394  | 1518  | 3938  | 3441  | 3290  | 3515  | 3113  | 4127  | 3351  | 1721  | 1644  | 1497  | 1492  | 1477  | 1542  | 1585  | Zfp667  |
| Zfp668  | 1420  | 1596  | 1922  | 1924  | 2059  | 2035  | 1939  | 2138  | 2214  | 2678  | 2391  | 2771  | 2535  | 2722  | 1437  | 1407  | 2079  | 1885  | 2205  | 1508  | 1859  | 3061  | 1897  | 2872  | 3236  | 2570  | 2481  | 2813  | Zfp668  |
| Zfp672  | 2560  | 2633  | 1912  | 2229  | 2314  | 2262  | 2356  | 2337  | 2431  | 2456  | 2532  | 2259  | 2252  | 2348  | 2491  | 2446  | 2124  | 2217  | 2354  | 2416  | 2403  | 2400  | 2389  | 2367  | 2439  | 2182  | 2245  | 2262  | Zfp672  |
| Zfp677  | 599   | 422   | 423   | 547   | 632   | 639   | 578   | 542   | 449   | 475   | 402   | 436   | 527   | 449   | 460   | 488   | 589   | 508   | 404   | 542   | 464   | 493   | 443   | 397   | 425   | 309   | 294   | 406   | Zfp677  |
| Zfp68   | 5638  | 5078  | 5332  | 5491  | 6036  | 6172  | 6773  | 9914  | 8119  | 7201  | 6912  | 7176  | 6918  | 7322  | 6670  | 5735  | 5574  | 5807  | 6257  | 7152  | 6460  | 8450  | 8081  | 7375  | 8230  | 6918  | 7391  | 7454  | Zfp68   |
| Zfp683  | 0     | 1     | 5     | 0     | 1     | 0     | 0     | 1     | 2     | 0     | 0     | 0     | 0     | 1     | 3     | 2     | 0     | 1     | 0     | 4     | 2     | 0     | 1     | 0     | 0     | 0     | 0     | 0     | Zfp683  |
| Zfp687  | 6584  | 8339  | 7319  | 8205  | 7060  | 7421  | 7401  | 3792  | 3975  | 4138  | 4027  | 5233  | 4900  | 4915  | 6399  | 6771  | 7631  | 7650  | 7695  | 6716  | 7697  | 3860  | 3710  | 4511  | 4510  | 4943  | 5466  | 5277  | Zfp687  |
| Zfp688  | 684   | 765   | 874   | 737   | 650   | 695   | 647   | 466   | 530   | 609   | 545   | 681   | 595   | 633   | 632   | 623   | 782   | 735   | 722   | 662   | 656   | 570   | 553   | 632   | 572   | 777   | 647   | 679   | Zfp688  |
| Zfp689  | 977   | 910   | 1218  | 1129  | 1267  | 1132  | 1133  | 924   | 1060  | 1313  | 1138  | 1383  | 1235  | 1311  | 960   | 836   | 1202  | 1029  | 1237  | 1010  | 1239  | 1198  | 895   | 1369  | 1230  | 1517  | 1263  | 1359  | Zfp689  |
| Zfp69   | 737   | 850   | 689   | 817   | 664   | 764   | 656   | 431   | 441   | 440   | 472   | 432   | 493   | 483   | 712   | 827   | 722   | 723   | 680   | 600   | 742   | 414   | 445   | 395   | 404   | 380   | 516   | 447   | Zfp69   |
| Zfp691  | 745   | 1075  | 1241  | 944   | 766   | 899   | 863   | 650   | 588   | 780   | 648   | 888   | 853   | 918   | 814   | 928   | 1145  | 867   | 985   | 792   | 845   | 665   | 605   | 798   | 754   | 959   | 852   | 939   | Zfp691  |
| Zfp692  | 1756  | 2081  | 2053  | 2200  | 2126  | 1906  | 2126  | 1937  | 2072  | 2287  | 2201  | 2443  | 2092  | 2249  | 1725  | 1860  | 2279  | 2317  | 2320  | 1841  | 1992  | 2161  | 2052  | 2554  | 2260  | 2624  | 2274  | 2216  | Zfp692  |
| Zfp697  | 2008  | 1934  | 2464  | 2558  | 2802  | 2331  | 2531  | 2982  | 2430  | 3080  | 2851  | 2858  | 2616  | 3036  | 2032  | 2053  | 2445  | 2495  | 2618  | 2224  | 2684  | 3588  | 2404  | 2941  | 3587  | 2598  | 2671  | 2954  | Zfp697  |
| Zfp7    | 1729  | 1638  | 1546  | 1411  | 1286  | 1284  | 1336  | 1226  | 1148  | 1133  | 1054  | 1137  | 1143  | 1197  | 1539  | 1600  | 1409  | 1303  | 1358  | 1470  | 1276  | 1130  | 1122  | 1225  | 1065  | 1264  | 1214  | 1258  | Zfp7    |
| Zfp703  | 1847  | 2169  | 2150  | 2315  | 2458  | 1945  | 1733  | 1917  | 2573  | 2590  | 3229  | 2168  | 2231  | 1774  | 1775  | 2199  | 2101  | 2370  | 1992  | 1450  | 1861  | 2498  | 2933  | 2187  | 2154  | 2573  | 1463  | 1679  | Zfp703  |
| Zfp704  | 8495  | 7520  | 5396  | 7387  | 10105 | 11762 | 10838 | 9418  | 10828 | 9783  | 11870 | 8335  | 8348  | 9395  | 7851  | 8644  | 5845  | 8278  | 8617  | 9346  | 11936 | 8014  | 10045 | 7727  | 10900 | 6035  | 9031  | 7136  | Zfp704  |
| Zfp706  | 14937 | 12510 | 14712 | 15255 | 15320 | 14795 | 16376 | 13650 | 12082 | 13105 | 12256 | 14203 | 12976 | 14100 | 14736 | 12495 | 14921 | 15038 | 15609 | 14659 | 16578 | 14417 | 12255 | 13385 | 13567 | 15070 | 13396 | 15101 | Zfp706  |
| Zfp707  | 726   | 922   | 824   | 879   | 730   | 713   | 761   | 579   | 697   | 732   | 674   | 627   | 633   | 602   | 719   | 843   | 809   | 795   | 842   | 741   | 736   | 627   | 641   | 760   | 674   | 662   | 637   | 589   | Zfp707  |
| Zfp708  | 1     | 0     | 0     | 0     | 0     | 0     | 0     | 0     | 0     | 0     | 1     | 2     | 0     | 1     | 3     | 0     | 0     | 0     | 0     | 0     | 1     | 0     | 0     | 0     | 0     | 0     | 0     | 0     | Zfp708  |
| Zfp709  | 1301  | 921   | 1031  | 942   | 1307  | 1477  | 1398  | 1774  | 1595  | 1472  | 1374  | 1176  | 1381  | 1371  | 1316  | 1051  | 1094  | 930   | 1226  | 1436  | 1263  | 1544  | 1547  | 1218  | 1442  | 1135  | 1332  | 1266  | Zfp709  |
| Zfp710  | 1173  | 1573  | 2317  | 1699  | 1972  | 1788  | 1551  | 2155  | 2631  | 1556  | 2699  | 3811  | 3047  | 3467  | 1241  | 1232  | 2301  | 1645  | 2243  | 1362  | 1569  | 2802  | 2382  | 3801  | 3248  | 4343  | 3619  | 3640  | Zfp710  |
| Zfp711  | 2961  | 2046  | 3436  | 3536  | 4255  | 3918  | 4348  | 5385  | 4430  | 4693  | 4668  | 5145  | 4716  | 5149  | 3371  | 2516  | 3206  | 3444  | 3956  | 3917  | 4032  | 5581  | 4393  | 4681  | 5408  | 4351  | 5174  | 5046  | Zfp711  |
| Zfp712  | 903   | 776   | 810   | 929   | 890   | 974   | 1040  | 1112  | 932   | 781   | 733   | 728   | 700   | 746   | 1101  | 890   | 965   | 986   | 903   | 1135  | 1057  | 957   | 896   | 759   | 761   | 734   | 674   | 748   | Zfp712  |
| Zfp715  | 3706  | 3347  | 2980  | 3522  | 3683  | 3739  | 3798  | 3472  | 3027  | 2568  | 2679  | 2501  | 2583  | 2665  | 3878  | 3527  | 3019  | 3509  | 3319  | 3807  | 3691  | 3362  | 2954  | 2382  | 2727  | 2207  | 2308  | 2444  | Zfp715  |
| Zfp719  | 2028  | 1792  | 1733  | 1552  | 1824  | 1825  | 1818  | 2494  | 2277  | 1905  | 1886  | 1786  | 1929  | 1970  | 2076  | 1822  | 1686  | 1667  | 1710  | 2100  | 1902  | 2054  | 2172  | 1758  | 1910  | 1279  | 2045  | 1949  | Zfp719  |
| Zfp72   | 633   | 476   | 683   | 557   | 691   | 753   | 677   | 777   | 727   | 793   | 620   | 717   | 478   | 575   | 529   | 708   | 618   | 591   | 576   | 560   | 734   | 594   | 775   | 796   | 523   | 561   | 511   | 511   | Zfp72   |
| Zfp729a | 1802  | 1342  | 1130  | 1475  | 1807  | 1857  | 1938  | 2532  | 2344  | 2053  | 1834  | 1919  | 1718  | 1845  | 1945  | 1568  | 1410  | 1405  | 1680  | 2141  | 1864  | 1972  | 2297  | 1754  | 1949  | 1528  | 1887  | 1781  | Zfp729a |
| Zfp729b | 698   | 466   | 660   | 660   | 721   | 684   | 724   | 1025  | 958   | 831   | 761   | 741   | 745   | 761   | 715   | 641   | 643   | 693   | 690   | 722   | 714   | 869   | 983   | 804   | 730   | 855   | 726   | 832   | Zfp729b |
| Zfp735  | 0     | 0     | 0     | 0     | 0     | 0     | 0     | 0     | 0     | 0     | 0     | 0     | 0     | 0     | 0     | 0     | 0     | 0     | 0     | 0     | 0     | 0     | 0     | 0     | 0     | 0     | 0     | 0     | Zfp735  |
| Zfp738  | 3624  | 2610  | 2430  | 2807  | 3142  | 3474  | 3365  | 5059  | 4445  | 3611  | 3935  | 3459  | 3477  | 3285  | 3786  | 3414  | 2801  | 3009  | 2996  | 4047  | 3488  | 3833  | 4086  | 3206  | 3876  | 2771  | 3543  | 3002  | Zfp738  |
| Zfp74   | 825   | 610   | 910   | 814   | 1066  | 863   | 955   | 1850  | 1639  | 1944  | 1691  | 1962  | 1723  | 1746  | 770   | 754   | 876   | 778   | 1022  | 768   | 978   | 2095  | 1757  | 1848  | 1829  | 1861  | 1804  | 1888  | Zfp74   |
| Zfp740  | 14200 | 13984 | 14860 | 16814 | 16910 | 16552 | 17013 | 14488 | 14754 | 16748 | 15815 | 18264 | 16987 | 18064 | 13321 | 13218 | 16249 | 16263 | 17649 | 14063 | 17120 | 16243 | 14120 | 18016 | 18215 | 18000 | 17290 | 17131 | Zfp740  |
| Zfp746  | 1985  | 1971  | 2353  | 2256  | 2495  | 2400  | 2285  | 2628  | 2903  | 3121  | 2873  | 3231  | 2888  | 3045  | 2105  | 1894  | 2374  | 2433  | 2710  | 2041  | 2246  | 2944  | 2731  | 3153  | 2967  | 3430  | 2702  | 3163  | Zfp746  |
| Zfp747  | 706   | 960   | 899   | 859   | 815   | 790   | 683   | 482   | 595   | 559   | 510   | 575   | 614   | 524   | 673   | 787   | 811   | 815   | 783   | 817   | 721   | 496   | 568   | 604   | 534   | 656   | 561   | 571   | Zfp747  |
| Zfp748  | 2554  | 2127  | 1820  | 1953  | 2052  | 2325  | 2404  | 3339  | 2980  | 2210  | 2363  | 2395  | 2261  | 2323  | 2801  | 2414  | 1810  | 1871  | 2011  | 2825  | 2389  | 2573  | 2898  | 2020  | 2241  | 2241  | 2392  | 2301  | Zfp748  |
| Zfp750  | 50    | 10    | 9     | 2     | 1     | 12    | 0     | 128   | 194   | 115   | 65    | 41    | 74    | 18    | 26    | 30    | 8     | 14    | 1     | 0     | 2     | 8     | 230   | 80    | 6     | 42    | 31    | 31    | Zfp750  |
| Zfp758  | 1181  | 967   | 1351  | 1224  | 1101  | 1223  | 1129  | 1330  | 1024  | 1092  | 946   | 1059  | 1102  | 1049  | 1361  | 1340  | 1345  | 1085  | 1188  | 1354  | 1213  | 1081  | 1122  | 981   | 972   | 969   | 1178  | 1148  | Zfp758  |
| Zfp759  | 614   | 420   | 486   | 425   | 645   | 645   | 689   | 1083  | 957   | 787   | 782   | 672   | 672   | 676   | 676   | 525   | 545   | 533   | 614   | 736   | 630   | 872   | 966   | 816   | 804   | 695   | 652   | 630   | Zfp759  |
| Zfp760  | 4487  | 3476  | 4131  | 4333  | 4199  | 4556  | 4948  | 5584  | 4482  | 4478  | 4104  | 5272  | 5026  | 5619  | 4342  | 4001  | 3946  | 4013  | 4131  | 4834  | 4034  | 4655  | 4334  | 4649  | 4510  | 4790  | 4998  | 5320  | Zfp760  |
| Zfp763  | 3188  | 2547  | 2949  | 3111  | 3164  | 3155  | 3508  | 3745  | 2987  | 2698  | 2554  | 2657  | 2545  | 2775  | 3459  | 3021  | 3062  | 3095  | 3017  | 3994  | 3550  | 3171  | 2887  | 2781  | 2854  | 2742  | 2696  | 3089  | Zfp763  |
| Zfp764  | 385   | 387   | 455   | 379   | 422   | 443   | 399   | 509   | 535   | 562   | 470   | 496   | 570   | 512   | 413   | 375   | 457   | 339   | 479   | 482   | 359   | 396   | 509   | 526   | 504   | 622   | 485   | 554</ |         |

|         |       |       |       |       |       |       |       |       |       |       |       |       |       |       |       |       |       |       |       |       |       |       |       |       |       |       |       |       |         |
|---------|-------|-------|-------|-------|-------|-------|-------|-------|-------|-------|-------|-------|-------|-------|-------|-------|-------|-------|-------|-------|-------|-------|-------|-------|-------|-------|-------|-------|---------|
| Zfp831  | 2     | 4     | 6     | 5     | 2     | 1     | 6     | 4     | 8     | 2     | 13    | 3     | 2     | 1     | 1     | 5     | 2     | 1     | 5     | 0     | 4     | 7     | 14    | 8     | 10    | 1     | 2     | 2     | Zfp831  |
| Zfp839  | 709   | 638   | 979   | 711   | 706   | 680   | 618   | 611   | 859   | 815   | 958   | 791   | 875   | 669   | 604   | 706   | 797   | 721   | 729   | 532   | 584   | 737   | 790   | 771   | 777   | 953   | 782   | 663   | Zfp839  |
| Zfp84   | 2343  | 2609  | 2065  | 2455  | 2603  | 2521  | 2505  | 3226  | 2597  | 2694  | 2582  | 2490  | 2245  | 2406  | 2503  | 2270  | 2440  | 2578  | 2388  | 2871  | 2666  | 2709  | 2761  | 2462  | 2863  | 2095  | 2428  | 2384  | Zfp84   |
| Zfp846  | 2963  | 2667  | 1892  | 2659  | 3634  | 3817  | 3657  | 6613  | 5766  | 5072  | 4727  | 4467  | 4395  | 4651  | 3237  | 2521  | 2211  | 2666  | 3171  | 3921  | 4122  | 5320  | 5294  | 3774  | 5548  | 2989  | 4522  | 4101  | Zfp846  |
| Zfp85   | 946   | 738   | 891   | 977   | 943   | 973   | 1034  | 917   | 748   | 683   | 627   | 701   | 628   | 634   | 1149  | 922   | 922   | 925   | 1008  | 1226  | 974   | 797   | 822   | 672   | 629   | 718   | 723   | 783   | Zfp85   |
| Zfp850  | 2842  | 2436  | 2311  | 2240  | 2274  | 2443  | 2541  | 2066  | 1712  | 1511  | 1442  | 1650  | 1716  | 1808  | 3038  | 2698  | 2268  | 2220  | 2095  | 3004  | 2297  | 1459  | 1543  | 1325  | 1519  | 1643  | 1669  | 1828  | Zfp850  |
| Zfp853  | 88    | 97    | 87    | 78    | 92    | 110   | 60    | 99    | 166   | 146   | 140   | 98    | 94    | 66    | 63    | 111   | 107   | 103   | 103   | 73    | 79    | 154   | 153   | 105   | 115   | 63    | 63    | 76    | Zfp853  |
| Zfp865  | 3009  | 3334  | 2785  | 3700  | 3289  | 3293  | 2928  | 2844  | 3268  | 3532  | 3610  | 4021  | 3540  | 3496  | 2664  | 2838  | 3187  | 3333  | 3386  | 2716  | 3218  | 3489  | 2973  | 3501  | 3583  | 3168  | 3815  | 3443  | Zfp865  |
| Zfp866  | 4170  | 4184  | 3591  | 4130  | 4428  | 4721  | 4217  | 8261  | 6888  | 6147  | 5989  | 6310  | 6112  | 6388  | 4348  | 3667  | 4001  | 3849  | 4491  | 4789  | 4455  | 6986  | 6594  | 5949  | 6713  | 4850  | 6656  | 6273  | Zfp866  |
| Zfp867  | 2632  | 2416  | 2200  | 2163  | 2128  | 2515  | 2516  | 1961  | 1907  | 1657  | 1497  | 1710  | 1444  | 1671  | 2980  | 2389  | 2271  | 2326  | 2225  | 2812  | 2454  | 1763  | 1917  | 1634  | 1673  | 1611  | 1527  | 1723  | Zfp867  |
| Zfp868  | 2017  | 1712  | 1830  | 1940  | 1901  | 2115  | 2025  | 3197  | 2609  | 2405  | 2144  | 2574  | 2334  | 2507  | 2106  | 1735  | 1852  | 1656  | 2134  | 2212  | 1957  | 2787  | 2642  | 2495  | 2569  | 2643  | 2721  | 2673  | Zfp868  |
| Zfp869  | 2915  | 2486  | 2588  | 2704  | 2788  | 2768  | 3058  | 4725  | 4271  | 3733  | 3759  | 4187  | 4051  | 4146  | 3101  | 2598  | 2781  | 2663  | 3037  | 2808  | 2815  | 4096  | 3955  | 3998  | 4083  | 4081  | 4453  | 4221  | Zfp869  |
| Zfp87   | 1921  | 1757  | 1678  | 1775  | 1725  | 1746  | 1982  | 2137  | 1782  | 1435  | 1422  | 1588  | 1479  | 1612  | 2008  | 1805  | 1792  | 1754  | 1883  | 2179  | 1811  | 1975  | 1725  | 1599  | 1709  | 1423  | 1644  | 1659  | Zfp87   |
| Zfp870  | 1969  | 1837  | 1580  | 1787  | 1910  | 1946  | 2114  | 1671  | 1443  | 1479  | 1292  | 1460  | 1435  | 1507  | 1904  | 1635  | 1635  | 1795  | 1977  | 2213  | 1985  | 1414  | 1448  | 1427  | 1450  | 1402  | 1632  | 1479  | Zfp870  |
| Zfp871  | 12641 | 10850 | 11343 | 12852 | 11875 | 12854 | 12421 | 14581 | 12621 | 11858 | 12504 | 13475 | 12813 | 13267 | 11910 | 12632 | 11359 | 13074 | 11939 | 12052 | 12343 | 13697 | 11945 | 11959 | 13609 | 11501 | 13837 | 12422 | Zfp871  |
| Zfp872  | 77    | 83    | 126   | 100   | 54    | 76    | 65    | 9     | 11    | 5     | 3     | 5     | 19    | 23    | 92    | 121   | 119   | 91    | 74    | 92    | 74    | 8     | 22    | 19    | 10    | 11    | 9     | 12    | Zfp872  |
| Zfp873  | 459   | 425   | 558   | 437   | 615   | 591   | 603   | 1605  | 1386  | 1184  | 1240  | 1300  | 1192  | 1330  | 525   | 400   | 606   | 487   | 571   | 701   | 583   | 1414  | 1377  | 1285  | 1326  | 1152  | 1274  | 1332  | Zfp873  |
| Zfp874a | 1158  | 790   | 900   | 843   | 785   | 766   | 949   | 1012  | 993   | 717   | 836   | 681   | 860   | 691   | 1114  | 1085  | 882   | 823   | 869   | 1135  | 804   | 827   | 1029  | 764   | 717   | 774   | 765   | 794   | Zfp874a |
| Zfp874b | 897   | 729   | 895   | 907   | 843   | 815   | 943   | 852   | 761   | 755   | 863   | 517   | 658   | 636   | 907   | 970   | 921   | 1045  | 909   | 1023  | 888   | 804   | 880   | 734   | 655   | 599   | 636   | 724   | Zfp874b |
| Zfp879  | 76    | 55    | 77    | 87    | 101   | 81    | 70    | 237   | 199   | 181   | 148   | 160   | 159   | 134   | 94    | 58    | 74    | 68    | 84    | 110   | 88    | 209   | 175   | 168   | 146   | 113   | 124   | 140   | Zfp879  |
| Zfp882  | 1405  | 1184  | 1056  | 1244  | 1467  | 1518  | 1506  | 2865  | 2209  | 2034  | 2088  | 2041  | 1955  | 2089  | 1486  | 1072  | 1265  | 1130  | 1693  | 1766  | 1522  | 2060  | 2040  | 1976  | 2153  | 1276  | 1985  | 1906  | Zfp882  |
| Zfp9    | 2064  | 1599  | 1771  | 1826  | 2214  | 2164  | 1852  | 2566  | 2667  | 2644  | 2815  | 2070  | 2422  | 2111  | 1941  | 2076  | 1992  | 2169  | 1790  | 1912  | 1699  | 3018  | 2853  | 2240  | 2498  | 2111  | 1988  | 1929  | Zfp9    |
| Zfp90   | 2187  | 1821  | 1941  | 1792  | 2509  | 2475  | 2370  | 4444  | 4139  | 4311  | 3791  | 4644  | 3911  | 4293  | 2189  | 1678  | 2227  | 1906  | 2586  | 2356  | 2313  | 4508  | 3978  | 4358  | 4765  | 4078  | 4051  | 4237  | Zfp90   |
| Zfp91   | 8797  | 6613  | 8223  | 8034  | 8542  | 8994  | 9867  | 12993 | 10467 | 10353 | 10573 | 11979 | 11620 | 13568 | 8864  | 7080  | 7938  | 7689  | 8310  | 9365  | 9103  | 11570 | 10108 | 11153 | 11392 | 12098 | 12181 | 13180 | Zfp91   |
| Zfp92   | 93    | 90    | 86    | 85    | 168   | 95    | 141   | 99    | 110   | 127   | 85    | 77    | 82    | 66    | 73    | 77    | 98    | 87    | 101   | 124   | 125   | 119   | 100   | 96    | 149   | 30    | 48    | 64    | Zfp92   |
| Zfp93   | 761   | 713   | 633   | 642   | 828   | 758   | 792   | 973   | 854   | 800   | 771   | 746   | 793   | 792   | 703   | 637   | 706   | 662   | 706   | 795   | 703   | 792   | 870   | 962   | 732   | 933   | 791   | 722   | Zfp93   |
| Zfp930  | 1677  | 1372  | 1780  | 1691  | 1589  | 1612  | 1677  | 1849  | 1738  | 1561  | 1189  | 1760  | 1605  | 1643  | 1849  | 1742  | 1703  | 1471  | 1578  | 1962  | 1733  | 1554  | 1730  | 1635  | 1472  | 1919  | 1829  | 1677  | Zfp930  |
| Zfp931  | 1111  | 704   | 945   | 755   | 841   | 964   | 798   | 985   | 876   | 669   | 800   | 716   | 756   | 705   | 1147  | 1057  | 742   | 793   | 761   | 1024  | 794   | 600   | 944   | 724   | 707   | 792   | 841   | 780   | Zfp931  |
| Zfp932  | 3971  | 2945  | 3549  | 3815  | 4389  | 4688  | 4780  | 3968  | 3438  | 3596  | 3549  | 3519  | 3424  | 3818  | 3939  | 3604  | 3773  | 3803  | 4404  | 4415  | 4602  | 4141  | 3404  | 3537  | 3647  | 3523  | 3764  | 3429  | Zfp932  |
| Zfp933  | 2269  | 1882  | 2316  | 2179  | 2105  | 2300  | 2364  | 2446  | 2149  | 2208  | 2171  | 2229  | 2188  | 2369  | 2425  | 2031  | 2400  | 2221  | 2261  | 2223  | 2160  | 2413  | 2149  | 2383  | 2491  | 2467  | 2203  | 2292  | Zfp933  |
| Zfp934  | 729   | 462   | 871   | 569   | 603   | 699   | 731   | 904   | 842   | 813   | 888   | 895   | 1038  | 1004  | 736   | 677   | 705   | 571   | 577   | 683   | 578   | 942   | 845   | 914   | 752   | 1203  | 963   | 1075  | Zfp934  |
| Zfp935  | 247   | 191   | 230   | 217   | 197   | 213   | 236   | 276   | 259   | 281   | 293   | 266   | 261   | 298   | 185   | 210   | 154   | 196   | 212   | 276   | 254   | 222   | 257   | 304   | 257   | 258   | 268   | 316   | Zfp935  |
| Zfp936  | 1     | 1     | 0     | 0     | 1     | 1     | 4     | 0     | 1     | 0     | 0     | 0     | 0     | 0     | 3     | 0     | 0     | 1     | 1     | 0     | 2     | 0     | 0     | 0     | 0     | 0     | 6     | 0     | Zfp936  |
| Zfp937  | 497   | 426   | 422   | 442   | 563   | 527   | 477   | 780   | 652   | 581   | 632   | 569   | 684   | 606   | 633   | 540   | 484   | 447   | 580   | 608   | 487   | 662   | 704   | 555   | 559   | 515   | 619   | 574   | Zfp937  |
| Zfp938  | 1646  | 1227  | 1579  | 1480  | 1597  | 1547  | 1840  | 1633  | 1430  | 1461  | 1316  | 1366  | 1372  | 1441  | 1863  | 1530  | 1524  | 1446  | 1563  | 1845  | 1673  | 1427  | 1476  | 1261  | 1555  | 1325  | 1438  | 1588  | Zfp938  |
| Zfp94   | 514   | 570   | 611   | 641   | 664   | 608   | 634   | 760   | 873   | 923   | 839   | 886   | 831   | 855   | 560   | 519   | 592   | 670   | 711   | 704   | 626   | 856   | 818   | 948   | 970   | 863   | 868   | 835   | Zfp94   |
| Zfp940  | 1694  | 1481  | 1360  | 1355  | 1539  | 1570  | 1882  | 1605  | 1460  | 1398  | 1198  | 1431  | 1159  | 1360  | 1664  | 1276  | 1527  | 1536  | 1582  | 1832  | 1770  | 1384  | 1330  | 1362  | 1385  | 1318  | 1392  | 1346  | Zfp940  |
| Zfp941  | 1324  | 1180  | 1068  | 1320  | 1429  | 1496  | 1293  | 1254  | 1083  | 1008  | 859   | 930   | 846   | 892   | 1501  | 1160  | 1182  | 1153  | 1267  | 1462  | 1307  | 1395  | 1046  | 823   | 989   | 653   | 869   | 777   | Zfp941  |
| Zfp942  | 3675  | 2500  | 3221  | 3100  | 2882  | 3428  | 3579  | 2754  | 2506  | 2242  | 2083  | 2417  | 2279  | 2340  | 3857  | 3481  | 3174  | 2933  | 3385  | 3530  | 3391  | 2401  | 2410  | 2271  | 2064  | 2409  | 2407  | 2366  | Zfp942  |
| Zfp943  | 2092  | 1417  | 1968  | 1937  | 1976  | 2271  | 2370  | 2386  | 2009  | 2131  | 1983  | 2240  | 2258  | 2206  | 2372  | 2079  | 2214  | 1798  | 2014  | 2346  | 2194  | 2254  | 2076  | 2276  | 2133  | 2282  | 2234  | 2307  | Zfp943  |
| Zfp944  | 2719  | 2204  | 2809  | 3136  | 2771  | 3062  | 3612  | 1789  | 1556  | 1650  | 1512  | 1821  | 1590  | 1855  | 3103  | 2801  | 3085  | 3068  | 2826  | 3354  | 3143  | 1801  | 1632  | 1696  | 1829  | 1748  | 1773  | 1855  | Zfp944  |
| Zfp945  | 4841  | 2971  | 3134  | 3595  | 4408  | 5077  | 4900  | 5929  | 5548  | 4209  | 4479  | 4735  | 4923  | 5089  | 5070  | 3932  | 3310  | 3345  | 3824  | 5734  | 4610  | 4495  | 5188  | 3903  | 4278  | 3509  | 5088  | 4571  | Zfp945  |
| Zfp946  | 4851  | 3340  | 5051  | 5112  | 5962  | 5982  | 6781  | 4920  | 3845  | 4302  | 3640  | 4360  | 4003  | 4559  | 5521  | 4293  | 5366  | 5226  | 5828  | 5989  | 5935  | 4609  | 3876  | 4266  | 4239  | 4172  | 4312  | 4333  | Zfp946  |
| Zfp947  | 332   | 161   | 280   | 227   | 284   | 254   | 305   | 258   | 257   | 205   | 236   | 234   | 281   | 202   | 235   | 267   | 265   | 216   | 238   | 278   | 248   | 197   | 266   | 218   | 160   | 245   | 277   | 214   | Zfp947  |
| Zfp948  | 3054  | 2594  | 2711  | 3329  | 2781  | 3090  | 3026  | 1981  | 1888  | 2064  | 1786  | 1870  | 1691  | 1796  | 2996  | 2886  | 2487  | 3097  | 2580  | 3137  | 2851  | 1977  | 1941  | 1670  | 1838  | 1761  | 1628  | 1604  | Zfp948  |
| Zfp949  | 2006  | 1686  | 2055  | 1990  | 2150  | 2110  | 2197  | 1832  | 1548  | 1769  | 1751  | 1396  | 1683  | 1379  | 2069  | 1823  | 1962  | 1962  | 2254  | 2026  | 2137  | 2077  | 1493  | 1558  | 1701  | 1381  | 1426  | 1321  | Zfp949  |
| Zfp950  | 3843  | 2673  | 2263  | 2386  | 2643  | 3279  | 2939  | 4787  | 4596  | 3516  | 4644  | 3209  | 3722  | 3675  | 3429  | 3778  | 2371  | 2609  | 2390  | 3336  | 2930  | 3551  | 4570  | 3246  | 3434  | 2672  | 3348  | 3088  | Zfp950  |
| Zfp951  | 240   | 184   | 330   | 166   | 313   | 270   | 2     |       |       |       |       |       |       |       |       |       |       |       |       |       |       |       |       |       |       |       |       |       |         |



|          |       |       |       |       |       |       |       |       |       |       |       |       |       |       |       |       |       |       |       |       |       |       |       |       |       |       |       |          |          |
|----------|-------|-------|-------|-------|-------|-------|-------|-------|-------|-------|-------|-------|-------|-------|-------|-------|-------|-------|-------|-------|-------|-------|-------|-------|-------|-------|-------|----------|----------|
| Zfp981   | 23    | 24    | 37    | 61    | 68    | 26    | 49    | 13    | 16    | 19    | 21    | 17    | 11    | 19    | 58    | 53    | 28    | 37    | 29    | 50    | 38    | 48    | 21    | 18    | 17    | 20    | 17    | 17       | Zfp981   |
| Zfp982   | 42    | 46    | 72    | 52    | 47    | 41    | 29    | 180   | 131   | 139   | 113   | 104   | 203   | 135   | 51    | 72    | 48    | 37    | 48    | 62    | 39    | 130   | 175   | 89    | 107   | 128   | 177   | 142      | Zfp982   |
| Zfp983   | 1322  | 1358  | 1472  | 1754  | 1774  | 1751  | 1926  | 2023  | 1490  | 1617  | 1582  | 1498  | 1450  | 1540  | 1437  | 1316  | 1559  | 1641  | 1615  | 1824  | 1654  | 2003  | 1544  | 1539  | 1760  | 1268  | 1446  | 1496     | Zfp983   |
| Zfp984   | 881   | 578   | 1006  | 949   | 875   | 827   | 1021  | 775   | 768   | 715   | 651   | 820   | 792   | 752   | 1004  | 900   | 912   | 951   | 828   | 975   | 869   | 832   | 849   | 695   | 650   | 981   | 803   | 909      | Zfp984   |
| Zfp985   | 6     | 3     | 7     | 8     | 0     | 4     | 9     | 2     | 12    | 8     | 9     | 5     | 7     | 6     | 3     | 4     | 12    | 1     | 5     | 5     | 3     | 7     | 11    | 7     | 12    | 9     | 2     | 13       | Zfp985   |
| Zfp986   | 6     | 2     | 0     | 17    | 15    | 18    | 8     | 5     | 2     | 8     | 1     | 3     | 3     | 1     | 15    | 0     | 3     | 14    | 8     | 0     | 15    | 12    | 3     | 7     | 6     | 0     | 0     | 1        | Zfp986   |
| Zfp987   | 0     | 0     | 0     | 0     | 0     | 0     | 0     | 0     | 0     | 0     | 0     | 0     | 0     | 0     | 0     | 0     | 0     | 0     | 0     | 1     | 1     | 0     | 0     | 0     | 0     | 0     | 0     | 0        | Zfp987   |
| Zfp988   | 0     | 0     | 3     | 3     | 10    | 1     | 7     | 2     | 1     | 17    | 0     | 0     | 0     | 1     | 8     | 5     | 5     | 8     | 1     | 0     | 7     | 3     | 0     | 0     | 0     | 3     | 0     | 1        | Zfp988   |
| Zfp989   | 1     | 1     | 1     | 1     | 1     | 0     | 0     | 1     | 0     | 1     | 0     | 1     | 1     | 5     | 2     | 1     | 2     | 0     | 2     | 6     | 0     | 0     | 2     | 0     | 2     | 0     | 2     | 0        | Zfp989   |
| Zfp990   | 5     | 1     | 3     | 4     | 10    | 10    | 3     | 4     | 4     | 14    | 6     | 0     | 0     | 3     | 3     | 12    | 8     | 9     | 2     | 12    | 10    | 2     | 2     | 2     | 0     | 3     | 2     | 2        | Zfp990   |
| Zfp991   | 431   | 238   | 489   | 312   | 313   | 399   | 305   | 425   | 419   | 307   | 342   | 391   | 374   | 404   | 464   | 541   | 333   | 306   | 358   | 454   | 321   | 371   | 461   | 330   | 352   | 377   | 439   | 530      | Zfp991   |
| Zfp992   | 309   | 160   | 288   | 148   | 182   | 219   | 116   | 263   | 242   | 185   | 179   | 139   | 218   | 143   | 361   | 389   | 111   | 116   | 118   | 283   | 166   | 155   | 294   | 105   | 168   | 171   | 229   | 169      | Zfp992   |
| Zfp993   | 112   | 49    | 196   | 139   | 74    | 85    | 83    | 101   | 129   | 117   | 141   | 48    | 227   | 70    | 107   | 157   | 71    | 76    | 113   | 88    | 80    | 94    | 177   | 69    | 110   | 112   | 114   | 69       | Zfp993   |
| Zfp994   | 810   | 557   | 812   | 862   | 1006  | 854   | 894   | 1230  | 1088  | 1077  | 880   | 1072  | 1015  | 1001  | 845   | 765   | 892   | 765   | 863   | 1088  | 857   | 1089  | 1126  | 1045  | 1089  | 921   | 1097  | 1025     | Zfp994   |
| Zfp995   | 912   | 625   | 951   | 1125  | 1103  | 1144  | 1322  | 1011  | 924   | 1031  | 979   | 1103  | 987   | 996   | 1106  | 829   | 991   | 1089  | 1097  | 1146  | 1189  | 1023  | 845   | 954   | 980   | 1076  | 1080  | 997      | Zfp995   |
| Zfp1     | 1024  | 1202  | 1324  | 1288  | 1100  | 1054  | 1069  | 939   | 1054  | 1272  | 1099  | 1077  | 1064  | 1191  | 949   | 1020  | 1264  | 1242  | 1133  | 1019  | 1134  | 899   | 1062  | 1180  | 1105  | 1268  | 1067  | 1151     | Zfp1     |
| Zfpm1    | 1633  | 2222  | 2201  | 2163  | 1969  | 1748  | 1209  | 548   | 666   | 732   | 732   | 743   | 981   | 734   | 1629  | 1981  | 2299  | 2038  | 2145  | 1451  | 1514  | 824   | 676   | 710   | 675   | 542   | 793   | 763      | Zfpm1    |
| Zfpm2    | 1053  | 1169  | 1205  | 1480  | 2176  | 1881  | 1838  | 1862  | 1594  | 1960  | 1700  | 1733  | 1924  | 1914  | 1167  | 1026  | 1395  | 1815  | 1954  | 1753  | 2157  | 2438  | 1585  | 2049  | 2349  | 970   | 1988  | 1828     | Zfpm2    |
| Zfr      | 15190 | 12971 | 13262 | 13819 | 15277 | 14640 | 15756 | 21426 | 17549 | 16296 | 16883 | 16940 | 15940 | 17060 | 16118 | 13113 | 13818 | 14198 | 14496 | 16192 | 15683 | 18997 | 17988 | 16496 | 17031 | 15800 | 17066 | 17451    | Zfr      |
| Zfr2     | 2307  | 2930  | 2933  | 4029  | 3792  | 3351  | 3131  | 1428  | 1846  | 2015  | 2017  | 1627  | 1531  | 1464  | 2421  | 2700  | 3509  | 4084  | 3845  | 2919  | 3355  | 2398  | 1655  | 1894  | 1948  | 1180  | 1412  | 1321     | Zfr2     |
| Zfta     | 6614  | 7348  | 9524  | 9225  | 11178 | 9304  | 9562  | 21058 | 20618 | 26096 | 24516 | 27303 | 23605 | 28222 | 6597  | 5686  | 10527 | 9370  | 11925 | 8787  | 9950  | 25308 | 18485 | 28845 | 29672 | 26268 | 25543 | 25299    | Zfta     |
| Zfx      | 2766  | 2027  | 2570  | 2378  | 2811  | 2830  | 2744  | 7347  | 6387  | 5284  | 6306  | 6622  | 6330  | 6854  | 2742  | 2309  | 2378  | 2111  | 2724  | 2975  | 2611  | 6274  | 6273  | 6076  | 6073  | 5338  | 6968  | 6928     | Zfx      |
| Zfy1     | 0     | 1     | 2     | 0     | 3     | 6     | 2     | 0     | 2     | 0     | 4     | 2     | 7     | 11    | 0     | 0     | 0     | 0     | 0     | 0     | 0     | 0     | 0     | 0     | 0     | 0     | 0     | 0        | Zfy1     |
| Zfyve1   | 4346  | 4904  | 4526  | 4870  | 5257  | 4866  | 4805  | 4798  | 4630  | 4806  | 4688  | 5109  | 4820  | 4906  | 4251  | 4158  | 4770  | 4803  | 5520  | 4709  | 5009  | 5015  | 4566  | 5044  | 5374  | 4391  | 5187  | 4895     | Zfyve1   |
| Zfyve16  | 5018  | 4108  | 3368  | 4074  | 4057  | 4662  | 4354  | 5244  | 4805  | 3911  | 4573  | 3678  | 3892  | 4181  | 5246  | 4936  | 3644  | 4173  | 3624  | 4914  | 4576  | 4278  | 5042  | 3631  | 4227  | 3003  | 3942  | 3923     | Zfyve16  |
| Zfyve19  | 1799  | 2181  | 1991  | 2009  | 1798  | 1938  | 1837  | 1463  | 1773  | 1574  | 1623  | 1543  | 1591  | 1567  | 1683  | 1901  | 1916  | 1839  | 1958  | 1888  | 1719  | 1491  | 1814  | 1580  | 1556  | 1751  | 1683  | 1576     | Zfyve19  |
| Zfyve21  | 1810  | 2137  | 1905  | 1665  | 1061  | 1363  | 1254  | 983   | 1210  | 985   | 1179  | 1086  | 1068  | 895   | 1640  | 2033  | 1774  | 1598  | 1252  | 1353  | 1214  | 952   | 1144  | 1119  | 943   | 1307  | 1089  | 1016     | Zfyve21  |
| Zfyve26  | 2020  | 2271  | 1541  | 1901  | 2112  | 2130  | 2048  | 2536  | 2992  | 2735  | 2963  | 3249  | 3079  | 2974  | 1970  | 2065  | 1881  | 2072  | 2162  | 1905  | 2154  | 2720  | 2699  | 2519  | 2864  | 1978  | 3206  | 2917     | Zfyve26  |
| Zfyve27  | 6817  | 8499  | 6981  | 9752  | 9423  | 8527  | 8936  | 4780  | 4857  | 5240  | 5073  | 4846  | 4749  | 4768  | 7639  | 7191  | 8615  | 10118 | 9453  | 8558  | 9137  | 5858  | 4393  | 5017  | 5665  | 3784  | 4692  | 4586     | Zfyve27  |
| Zfyve28  | 1044  | 1361  | 1360  | 1435  | 1602  | 1313  | 1293  | 294   | 412   | 315   | 384   | 304   | 327   | 269   | 1113  | 1205  | 1301  | 1471  | 1372  | 1277  | 1318  | 411   | 342   | 340   | 429   | 177   | 259   | 243      | Zfyve28  |
| Zfyve9   | 2959  | 2236  | 2077  | 2182  | 2833  | 2776  | 2665  | 6305  | 5759  | 5286  | 5138  | 4954  | 5196  | 5224  | 2819  | 2406  | 2369  | 2226  | 2655  | 2806  | 2699  | 5431  | 5478  | 4796  | 5244  | 3985  | 5199  | 5161     | Zfyve9   |
| Zg16     | 1     | 0     | 0     | 0     | 0     | 0     | 1     | 0     | 0     | 0     | 0     | 0     | 2     | 2     | 3     | 0     | 0     | 2     | 0     | 0     | 0     | 0     | 0     | 0     | 0     | 1     | 1     | 0        | Zg16     |
| Zglp1    | 0     | 0     | 0     | 0     | 0     | 0     | 0     | 0     | 0     | 0     | 0     | 0     | 0     | 0     | 0     | 0     | 1     | 0     | 0     | 0     | 0     | 0     | 2     | 0     | 1     | 0     | 0     | 0        | Zglp1    |
| Zgpat    | 3147  | 4024  | 3289  | 4452  | 4610  | 4005  | 3880  | 3679  | 3816  | 4028  | 4022  | 3919  | 3615  | 3726  | 3227  | 3338  | 3904  | 4614  | 4490  | 3865  | 4241  | 4274  | 3599  | 4106  | 4428  | 2747  | 3640  | 3584     | Zgpat    |
| Zgrf1    | 5651  | 4073  | 3085  | 3367  | 2478  | 3600  | 3979  | 3008  | 3044  | 2412  | 2400  | 3720  | 3316  | 3909  | 5116  | 3917  | 3390  | 3101  | 2974  | 4180  | 3432  | 1744  | 2519  | 2622  | 2452  | 3040  | 4038  | 3574     | Zgrf1    |
| Zhx2     | 671   | 816   | 1110  | 992   | 1162  | 895   | 841   | 1371  | 1858  | 1990  | 1864  | 2209  | 1414  | 1829  | 790   | 833   | 1166  | 1062  | 1193  | 791   | 915   | 1755  | 1563  | 2095  | 2018  | 2350  | 1571  | 1608     | Zhx2     |
| Zhx3     | 3354  | 3579  | 3192  | 3935  | 4193  | 4109  | 4172  | 2656  | 2931  | 2910  | 3047  | 2791  | 2485  | 2780  | 3517  | 3406  | 3719  | 4058  | 4202  | 3860  | 4482  | 3141  | 2680  | 2559  | 3519  | 2249  | 2721  | 2529     | Zhx3     |
| Zic1     | 13906 | 14299 | 23177 | 19310 | 19617 | 18194 | 20021 | 17837 | 16294 | 19311 | 18557 | 22769 | 19367 | 26285 | 16764 | 12930 | 19546 | 16527 | 18763 | 17406 | 18888 | 23255 | 20995 | 21046 | 22915 | 23194 | 23178 | 25648    | Zic1     |
| Zic2     | 3812  | 4326  | 8208  | 5637  | 5479  | 5004  | 5474  | 5255  | 4803  | 5701  | 5426  | 7617  | 6843  | 8132  | 4876  | 4599  | 6217  | 5437  | 5622  | 4928  | 4915  | 7001  | 5902  | 6699  | 7112  | 8435  | 7475  | 7977     | Zic2     |
| Zic3     | 3876  | 4220  | 6559  | 5573  | 4709  | 5374  | 5001  | 4426  | 3376  | 4186  | 3709  | 5999  | 5459  | 6259  | 4953  | 3717  | 5657  | 4723  | 5359  | 4466  | 5006  | 5852  | 4084  | 4864  | 4887  | 4602  | 5958  | 6697     | Zic3     |
| Zic4     | 4387  | 4239  | 6653  | 4891  | 5920  | 5742  | 6387  | 6309  | 5669  | 6470  | 5975  | 8450  | 7099  | 9207  | 4874  | 3585  | 5390  | 4714  | 6274  | 5738  | 5996  | 7855  | 7180  | 6654  | 7517  | 7203  | 8808  | 8850     | Zic4     |
| Zic5     | 2615  | 2553  | 5515  | 3676  | 3386  | 3205  | 3691  | 2734  | 2125  | 2794  | 2494  | 3928  | 3395  | 4326  | 3289  | 2817  | 3923  | 3153  | 3493  | 3159  | 3578  | 3716  | 2858  | 3385  | 3485  | 4133  | 3850  | 4546     | Zic5     |
| Zik1     | 7128  | 6643  | 6246  | 7007  | 7634  | 8427  | 8558  | 11017 | 8646  | 7451  | 6517  | 9091  | 7542  | 8928  | 8325  | 6650  | 6924  | 7340  | 8124  | 10210 | 8110  | 8843  | 8074  | 7669  | 9102  | 8435  | 9082  | 9016     | Zik1     |
| Zim1     | 3510  | 3085  | 1594  | 2616  | 3239  | 3407  | 3015  | 2828  | 5288  | 3176  | 12532 | 1808  | 2617  | 1925  | 3479  | 3566  | 1965  | 3952  | 2365  | 2999  | 3053  | 5093  | 6661  | 2453  | 3316  | 1545  | 1739  | 1353     | Zim1     |
| Zkscan1  | 7605  | 6643  | 6232  | 6955  | 7118  | 7533  | 7649  | 10359 | 9105  | 8398  | 8098  | 8787  | 8417  | 9137  | 8058  | 6330  | 6672  | 6687  | 6943  | 8194  | 7702  | 9403  | 8501  | 8510  | 9638  | 7572  | 9302  | 9200     | Zkscan1  |
| Zkscan14 | 689   | 866   | 563   | 861   | 640   | 632   | 549   | 542   | 564   | 512   | 506   | 540   | 431   | 476   | 733   | 738   | 666   | 692   | 620   | 694   | 591   | 597   | 550   | 530   | 495   | 410   | 535   | 475      | Zkscan14 |
| Zkscan16 | 1285  | 1233  | 388   | 753   | 725   | 1131  | 855   | 602   | 503   | 412   | 607   | 407   | 535   | 408   | 1120  | 1211  | 538   | 733   | 634   | 1171  | 976   | 348   | 537   | 315   | 399   | 122   | 427   | 333      | Zkscan16 |
| Zkscan17 | 2595  | 2725  | 3302  | 2515  | 2531  | 2563  | 2378  | 2708  | 2932  | 2777  | 4020  | 3576  | 3703  | 2383  | 2588  | 3142  | 2505  | 2916  | 2082  | 2517  | 2635  | 2606  | 3536  | 3170  | 4407  | 3570  | 3906  | Zkscan17 |          |
| Zkscan2  | 4812  | 4321  | 3646  | 5415  | 7017  | 6835  | 7062  | 6099  | 5716  | 6323  | 5912  | 6163  | 5342  | 5943  | 5015  | 4391  | 4616  | 5892  | 5866  | 5594  | 7184  | 7583  | 5120  | 5171  | 6786  | 327   |       |          |          |

|         |       |       |       |       |       |       |       |       |       |       |       |       |       |       |       |       |       |       |       |       |       |       |       |       |       |       |       |        |         |
|---------|-------|-------|-------|-------|-------|-------|-------|-------|-------|-------|-------|-------|-------|-------|-------|-------|-------|-------|-------|-------|-------|-------|-------|-------|-------|-------|-------|--------|---------|
| Znhit6  | 2606  | 2600  | 2407  | 2518  | 2113  | 2237  | 2328  | 2138  | 2121  | 2175  | 2209  | 2084  | 2068  | 2252  | 2637  | 2518  | 2461  | 2474  | 1905  | 2183  | 2192  | 2059  | 2047  | 2210  | 2150  | 2504  | 2165  | 2517   | Znhit6  |
| Znrd2   | 40    | 25    | 22    | 32    | 29    | 15    | 40    | 24    | 21    | 27    | 32    | 23    | 24    | 32    | 26    | 33    | 35    | 28    | 22    | 21    | 35    | 40    | 18    | 26    | 41    | 34    | 19    | 20     | Znrd2   |
| Znrf1   | 5345  | 6336  | 7184  | 9393  | 11003 | 8650  | 9614  | 7880  | 8464  | 10993 | 9766  | 9817  | 8410  | 10176 | 5583  | 5557  | 9202  | 9567  | 10796 | 7549  | 10197 | 11673 | 7969  | 11042 | 11445 | 9836  | 8380  | 9231   | Znrf1   |
| Znrf2   | 4840  | 4199  | 3581  | 6159  | 6995  | 7015  | 8532  | 4428  | 4205  | 3957  | 3679  | 3369  | 2956  | 3818  | 4912  | 4238  | 4560  | 7122  | 6714  | 6936  | 8563  | 3930  | 3875  | 4160  | 5322  | 2748  | 3049  | 3087   | Znrf2   |
| Znrf3   | 2520  | 2137  | 2426  | 2358  | 1956  | 2368  | 2244  | 1447  | 1437  | 1487  | 1585  | 1917  | 1819  | 1978  | 1948  | 2394  | 2097  | 2409  | 2084  | 1930  | 2205  | 1499  | 1618  | 1602  | 1647  | 1747  | 1971  | 2027   | Znrf3   |
| Znrf4   | 0     | 3     | 5     | 1     | 0     | 0     | 1     | 0     | 1     | 0     | 0     | 0     | 1     | 0     | 0     | 0     | 0     | 6     | 0     | 0     | 0     | 0     | 1     | 0     | 0     | 2     | 0     | 0      | Znrf4   |
| Zp1     | 0     | 2     | 4     | 0     | 4     | 0     | 0     | 4     | 2     | 1     | 1     | 0     | 1     | 1     | 0     | 3     | 2     | 0     | 4     | 0     | 4     | 2     | 3     | 7     | 0     | 1     | 0     | 0      | Zp1     |
| Zp2     | 3     | 1     | 2     | 4     | 1     | 2     | 2     | 1     | 0     | 1     | 18    | 1     | 2     | 0     | 1     | 7     | 0     | 0     | 3     | 3     | 2     | 2     | 8     | 0     | 0     | 2     | 0     | 0      | Zp2     |
| Zp3     | 0     | 1     | 0     | 2     | 2     | 2     | 0     | 4     | 2     | 5     | 0     | 0     | 2     | 2     | 1     | 0     | 0     | 2     | 1     | 3     | 2     | 7     | 3     | 11    | 0     | 6     | 2     | Zp3    |         |
| Zp3r    | 0     | 0     | 0     | 0     | 0     | 0     | 0     | 0     | 0     | 0     | 3     | 0     | 0     | 1     | 0     | 1     | 1     | 0     | 0     | 0     | 0     | 0     | 0     | 0     | 0     | 0     | 0     | 0      | Zp3r    |
| Zppb    | 23    | 15    | 17    | 48    | 17    | 19    | 30    | 89    | 73    | 93    | 83    | 59    | 76    | 42    | 25    | 11    | 17    | 25    | 35    | 48    | 29    | 107   | 71    | 73    | 74    | 41    | 88    | 80     | Zppb    |
| Zppb2   | 17    | 16    | 23    | 23    | 12    | 13    | 9     | 7     | 10    | 10    | 15    | 7     | 8     | 9     | 20    | 16    | 25    | 18    | 9     | 4     | 12    | 8     | 14    | 7     | 4     | 9     | 7     | 9      | Zppb2   |
| Zpld1   | 110   | 118   | 74    | 86    | 36    | 174   | 17    | 228   | 353   | 183   | 327   | 111   | 396   | 181   | 249   | 142   | 41    | 125   | 79    | 22    | 9     | 299   | 438   | 131   | 165   | 57    | 103   | 76     | Zpld1   |
| Zpld2   | 0     | 0     | 0     | 0     | 0     | 0     | 0     | 0     | 0     | 0     | 1     | 0     | 0     | 1     | 0     | 0     | 0     | 1     | 0     | 0     | 2     | 0     | 0     | 0     | 0     | 0     | 0     | 0      | Zpld2   |
| Zpr1    | 3780  | 4563  | 3502  | 3926  | 3269  | 3431  | 3446  | 3136  | 3115  | 2768  | 2737  | 3032  | 2714  | 2917  | 3866  | 3833  | 3532  | 3715  | 3289  | 3698  | 3525  | 2704  | 2873  | 3031  | 2919  | 3378  | 3220  | 3001   | Zpr1    |
| Zranb1  | 9260  | 7332  | 7448  | 9567  | 8789  | 9345  | 10331 | 8742  | 7063  | 6971  | 6436  | 6671  | 6489  | 7125  | 9699  | 7585  | 7675  | 8853  | 8953  | 9993  | 9986  | 8153  | 7018  | 6855  | 7770  | 6639  | 6929  | 6947   | Zranb1  |
| Zranb2  | 20213 | 13882 | 16723 | 16359 | 16703 | 18151 | 20051 | 23720 | 19244 | 17881 | 18454 | 21223 | 20927 | 22593 | 20214 | 17249 | 15973 | 16011 | 17005 | 20836 | 18412 | 19348 | 19260 | 19430 | 19356 | 20607 | 22111 | 21887  | Zranb2  |
| Zranb3  | 2555  | 2497  | 2270  | 1819  | 1461  | 1773  | 1881  | 2263  | 2101  | 1772  | 1829  | 2342  | 2235  | 2436  | 2465  | 2309  | 2074  | 1585  | 1792  | 2096  | 1878  | 1462  | 1847  | 1907  | 1780  | 2380  | 2589  | 2493   | Zranb3  |
| Zrsr1   | 1226  | 1318  | 1153  | 1627  | 1527  | 1220  | 1363  | 1417  | 1218  | 1339  | 1207  | 1006  | 1033  | 1128  | 1329  | 1230  | 1306  | 1482  | 1476  | 1354  | 1445  | 1439  | 1293  | 1265  | 1316  | 1182  | 1126  | 1065   | Zrsr1   |
| Zrsr2   | 2832  | 2341  | 2735  | 2951  | 2899  | 2898  | 3086  | 3942  | 3427  | 3717  | 3940  | 4122  | 3771  | 4153  | 2709  | 2386  | 2722  | 2890  | 2850  | 2869  | 2866  | 3696  | 3424  | 3931  | 3846  | 4121  | 4076  | 3993   | Zrsr2   |
| Zscan10 | 24    | 31    | 43    | 12    | 6     | 7     | 0     | 9     | 9     | 13    | 17    | 13    | 23    | 13    | 11    | 33    | 8     | 12    | 0     | 5     | 6     | 15    | 14    | 14    | 6     | 13    | 3     | 9      | Zscan10 |
| Zscan12 | 2079  | 2021  | 2041  | 1903  | 1930  | 1886  | 2069  | 2541  | 2218  | 1972  | 1862  | 2328  | 2284  | 2517  | 2048  | 1925  | 1919  | 1623  | 2014  | 2302  | 2009  | 1828  | 1908  | 2174  | 2227  | 2306  | 2502  | 2461   | Zscan12 |
| Zscan18 | 2067  | 2084  | 1737  | 2114  | 2567  | 2348  | 2106  | 2186  | 2038  | 2108  | 2177  | 1706  | 1768  | 1559  | 2174  | 2044  | 1893  | 2195  | 2291  | 2622  | 2097  | 2436  | 2008  | 1740  | 2138  | 1551  | 1655  | 1461   | Zscan18 |
| Zscan2  | 717   | 949   | 1000  | 1216  | 1308  | 1063  | 879   | 1331  | 1379  | 1686  | 1383  | 1438  | 1156  | 1230  | 771   | 906   | 1136  | 1166  | 1355  | 1054  | 1063  | 1365  | 1418  | 1589  | 1582  | 1523  | 1242  | 1259   | Zscan2  |
| Zscan20 | 1226  | 1541  | 1068  | 1166  | 1112  | 1278  | 1016  | 1154  | 1007  | 842   | 1070  | 997   | 949   | 897   | 1138  | 1357  | 993   | 1177  | 1068  | 1217  | 1370  | 921   | 1044  | 824   | 1185  | 770   | 1192  | 889    | Zscan20 |
| Zscan21 | 6579  | 7014  | 6476  | 6377  | 6748  | 6983  | 6795  | 8728  | 7421  | 6884  | 6368  | 8077  | 7304  | 8151  | 7286  | 6381  | 6942  | 6260  | 7162  | 7756  | 6875  | 7611  | 7222  | 7339  | 7830  | 8390  | 8573  | 8520   | Zscan21 |
| Zscan22 | 1658  | 1719  | 1452  | 1382  | 1320  | 1248  | 1323  | 1473  | 1280  | 1376  | 1188  | 1233  | 1183  | 1174  | 1560  | 1534  | 1398  | 1412  | 1390  | 1435  | 1409  | 1083  | 1204  | 1345  | 1087  | 1436  | 1175  | 1337   | Zscan22 |
| Zscan25 | 596   | 612   | 665   | 616   | 708   | 716   | 656   | 841   | 990   | 917   | 932   | 1160  | 1033  | 979   | 587   | 525   | 751   | 578   | 785   | 616   | 611   | 964   | 1013  | 1150  | 1000  | 1121  | 1073  | 1049   | Zscan25 |
| Zscan26 | 6854  | 6591  | 6116  | 6202  | 6329  | 6595  | 6849  | 7061  | 6665  | 6565  | 7659  | 6479  | 6767  | 7211  | 6454  | 6795  | 6529  | 6324  | 6242  | 6635  | 6627  | 7026  | 6814  | 6749  | 6805  | 5761  | 6310  | 6372   | Zscan26 |
| Zscan29 | 2234  | 2123  | 2654  | 2778  | 2403  | 2652  | 2739  | 2242  | 1900  | 2300  | 2139  | 2559  | 2315  | 2603  | 2115  | 2238  | 2595  | 2719  | 2666  | 2268  | 2668  | 2262  | 1919  | 2378  | 2525  | 2450  | 2533  | 2641   | Zscan29 |
| Zscan5b | 0     | 0     | 0     | 0     | 0     | 0     | 0     | 0     | 0     | 1     | 0     | 0     | 1     | 0     | 0     | 0     | 0     | 0     | 0     | 0     | 2     | 0     | 0     | 0     | 0     | 0     | 0     | 0      | Zscan5b |
| Zswim1  | 768   | 834   | 900   | 825   | 903   | 723   | 919   | 733   | 833   | 860   | 772   | 1030  | 984   | 993   | 700   | 823   | 1045  | 993   | 1018  | 741   | 890   | 942   | 731   | 907   | 888   | 1160  | 848   | 976    | Zswim1  |
| Zswim2  | 2     | 3     | 0     | 3     | 7     | 0     | 3     | 1     | 0     | 0     | 1     | 2     | 3     | 0     | 1     | 2     | 2     | 0     | 3     | 0     | 2     | 0     | 5     | 2     | 3     | 10    | 3     | 0      | Zswim2  |
| Zswim3  | 1105  | 1430  | 1118  | 1111  | 1026  | 1107  | 1071  | 702   | 727   | 750   | 641   | 582   | 657   | 719   | 1004  | 1105  | 1389  | 1140  | 1042  | 1068  | 1170  | 779   | 686   | 757   | 783   | 594   | 665   | 748    | Zswim3  |
| Zswim4  | 4992  | 6108  | 5569  | 5750  | 5662  | 5172  | 5330  | 5671  | 5981  | 6532  | 5389  | 7079  | 6438  | 6734  | 4700  | 4992  | 6070  | 5197  | 6211  | 5197  | 5386  | 6532  | 5456  | 6755  | 7034  | 6923  | 6696  | 6759   | Zswim4  |
| Zswim5  | 6051  | 5777  | 6270  | 7349  | 8354  | 7699  | 8172  | 6489  | 5830  | 6869  | 5272  | 8895  | 5708  | 8357  | 7034  | 5160  | 8624  | 7140  | 8943  | 7086  | 8663  | 8031  | 4794  | 7340  | 8357  | 7350  | 7209  | 7970   | Zswim5  |
| Zswim6  | 5138  | 5833  | 5798  | 7953  | 7459  | 7027  | 7137  | 5152  | 4750  | 5764  | 5186  | 5942  | 5388  | 5835  | 5545  | 5260  | 6792  | 7669  | 7091  | 5707  | 7353  | 7038  | 4656  | 5368  | 6891  | 4717  | 5278  | 5663   | Zswim6  |
| Zswim7  | 165   | 187   | 129   | 108   | 114   | 124   | 126   | 249   | 259   | 243   | 256   | 234   | 240   | 231   | 166   | 142   | 121   | 111   | 130   | 138   | 115   | 224   | 234   | 208   | 203   | 298   | 286   | 280    | Zswim7  |
| Zswim8  | 16319 | 21053 | 21408 | 24677 | 23159 | 21782 | 20002 | 12118 | 14599 | 17265 | 16219 | 17250 | 15605 | 15307 | 15883 | 19038 | 23434 | 24594 | 23704 | 17353 | 21225 | 17406 | 16601 | 17816 | 13813 | 14898 | 14790 | Zswim8 |         |
| Zswim9  | 1609  | 1710  | 1907  | 1855  | 1811  | 1889  | 1801  | 2353  | 2465  | 2794  | 2556  | 2635  | 2487  | 2786  | 1631  | 1677  | 1746  | 1701  | 1824  | 2017  | 1823  | 2234  | 2331  | 2679  | 2562  | 2623  | 2834  | 2588   | Zswim9  |
| Zup1    | 1970  | 1533  | 2041  | 2125  | 2001  | 2232  | 2110  | 2648  | 2143  | 2074  | 2048  | 2221  | 2292  | 2336  | 2018  | 1826  | 1982  | 1931  | 1946  | 2299  | 2122  | 2105  | 2060  | 2179  | 2025  | 2050  | 2200  | 2112   | Zup1    |
| Zw10    | 6050  | 6175  | 5724  | 5181  | 4528  | 4661  | 5471  | 4347  | 3791  | 3894  | 3587  | 4546  | 4118  | 4553  | 6041  | 5421  | 5473  | 4870  | 5202  | 5582  | 5055  | 3511  | 3693  | 4041  | 3753  | 4717  | 4453  | 4675   | Zw10    |
| Zwilch  | 4640  | 3838  | 4435  | 3369  | 2227  | 2852  | 3353  | 2811  | 2696  | 2551  | 2494  | 3620  | 3378  | 3746  | 3990  | 3857  | 3808  | 3258  | 2916  | 3204  | 2991  | 2162  | 2365  | 3095  | 2518  | 4154  | 3603  | 3642   | Zwilch  |
| Zwint   | 22863 | 23908 | 21866 | 21875 | 21917 | 21153 | 23931 | 23957 | 20036 | 18423 | 18228 | 20601 | 19828 | 21804 | 25134 | 20690 | 22503 | 20852 | 22853 | 26613 | 23110 | 20954 | 19480 | 19305 | 20976 | 21745 | 21063 | 22037  | Zwint   |
| Zxdb    | 654   | 352   | 711   | 668   | 704   | 740   | 730   | 953   | 868   | 690   | 785   | 743   | 781   | 859   | 778   | 555   | 607   | 671   | 670   | 660   | 741   | 1059  | 784   | 774   | 804   | 843   | 805   | 843    | Zxdb    |
| Zxdc    | 2361  | 2692  | 2146  | 2996  | 2688  | 2640  | 2706  | 2088  | 2019  | 2016  | 2022  | 2123  | 1814  | 2005  | 2268  | 2231  | 2427  | 3017  | 2877  | 2576  | 2830  | 2319  | 1916  | 1814  | 2202  | 1725  | 1930  | 1890   | Zxdc    |
| Zyg11a  | 31    | 29    | 3     | 18    | 23    | 33    | 17    | 5     | 5     | 5     | 8     | 13    | 6     | 3     | 34    | 53    | 20    | 17    | 3     | 20    | 21    | 7     | 13    | 3     | 11    | 0     | 7     | 5      | Zyg11a  |
| Zyg11b  | 20269 | 18849 | 11722 | 17978 | 22243 | 23874 | 24674 | 23448 | 19764 | 17808 | 17380 | 17254 | 16895 | 18233 | 21493 | 17700 | 14589 | 18647 | 20304 | 24454 | 24886 | 19515 | 19388 | 14617 | 20494 | 9986  | 19033 | 16880  | Zyg11b  |
| Zyx     | 3084  | 3938  | 4303  | 3148  | 3346  | 3054  | 2271  | 3174  | 4182  | 3953  | 5241  | 4765  | 4635  | 3910  | 2823  | 3852  | 3604  | 3203  | 3397  | 2102  | 2532  | 3618  | 4684  | 4372  | 3699  | 5890  | 4391  | 4188   | Zyx     |
| Zzef1   | 9481  | 9771  | 4639  | 7075  |       |       |       |       |       |       |       |       |       |       |       |       |       |       |       |       |       |       |       |       |       |       |       |        |         |
