# Supplementary material for: Rapid effects of valproic acid on the fetal brain transcriptome: implications for brain development and autism
Source: PubMed Central journal article supplement — Transl Psychiatry. 2024 Dec 4;14:482. doi: 10.1038/s41398-024-03179-1 (PMC11618798; doi:10.1038/s41398-024-03179-1), 2024-12-04
Supplement: 41398_2024_3179_MOESM3_ESM.pdf [file 41398_2024_3179_MOESM3_ESM.pdf]

| Gene           | Counts | Male  |       |                  | Female |       |                  |
|----------------|--------|-------|-------|------------------|--------|-------|------------------|
|                |        | FC    | LFC   | p <sub>FDR</sub> | FC     | LFC   | p <sub>FDR</sub> |
| 1110004F10Rik  | 10227  | -1.21 | -0.28 | 1.1E-03          | -1.29  | -0.37 | 1.6E-05          |
| 1110017D15Rik  | 366    | 3.55  | 1.83  | 8.6E-25          | 3.61   | 1.85  | 2.2E-25          |
| 1110038F14Rik  | 1540   | -1.54 | -0.62 | 4.0E-09          | -1.73  | -0.79 | 5.8E-14          |
| 1110059E24Rik  | 3275   | 1.34  | 0.42  | 9.4E-05          | 1.38   | 0.47  | 1.3E-05          |
| 1110059G10Rik  | 1092   | -1.68 | -0.75 | 5.0E-15          | -1.68  | -0.75 | 4.8E-15          |
| 1190007I07Rik  | 446    | -1.50 | -0.59 | 5.3E-08          | -1.72  | -0.78 | 4.2E-13          |
| 1500009C09Rik  | 1708   | 1.64  | 0.71  | 1.2E-03          | 1.69   | 0.76  | 5.1E-04          |
| 1500009L16Rik  | 1141   | 1.74  | 0.80  | 1.6E-32          | 1.66   | 0.73  | 3.5E-27          |
| 1600014C10Rik  | 1018   | -1.80 | -0.85 | 3.0E-28          | -1.79  | -0.84 | 1.6E-27          |
| 1700001O22Rik  | 185    | 2.86  | 1.51  | 1.5E-18          | 2.53   | 1.34  | 8.7E-15          |
| 1700003E16Rik  | 238    | 4.56  | 2.19  | 2.5E-33          | 4.03   | 2.01  | 1.5E-28          |
| 1700017B05Rik  | 1189   | 1.56  | 0.64  | 1.1E-04          | 1.44   | 0.53  | 1.8E-03          |
| 1700019D03Rik  | 360    | 3.51  | 1.81  | 4.4E-11          | 3.41   | 1.77  | 1.4E-10          |
| 1700029J07Rik  | 352    | -1.87 | -0.90 | 1.1E-19          | -1.75  | -0.81 | 4.3E-16          |
| 1700030J22Rik  | 533    | 1.90  | 0.93  | 4.2E-19          | 1.87   | 0.90  | 3.8E-18          |
| 1700030K09Rik  | 823    | -5.92 | -2.57 | 2.8E-83          | -5.85  | -2.55 | 2.3E-82          |
| 1700037C18Rik  | 116    | -2.51 | -1.33 | 3.2E-16          | -2.77  | -1.47 | 2.5E-19          |
| 1700037H04Rik  | 3120   | 1.90  | 0.92  | 2.0E-12          | 1.71   | 0.77  | 5.5E-09          |
| 1700066M21Rik  | 1664   | 1.35  | 0.44  | 1.7E-03          | 1.40   | 0.48  | 4.7E-04          |
| 1700088E04Rik  | 521    | 2.56  | 1.36  | 1.8E-39          | 2.73   | 1.45  | 9.3E-45          |
| 1700093K21Rik  | 119    | 4.46  | 2.16  | 2.7E-13          | 6.25   | 2.64  | 7.4E-19          |
| 1700094D03Rik  | 356    | 1.85  | 0.89  | 1.8E-13          | 1.81   | 0.85  | 1.5E-12          |
| 1700102P08Rik  | 274    | 1.88  | 0.91  | 6.0E-10          | 1.90   | 0.93  | 2.8E-10          |
| 1810010H24Rik  | 193    | 1.79  | 0.84  | 9.5E-08          | 1.93   | 0.95  | 1.6E-09          |
| 1810024B03Rik  | 123    | -2.57 | -1.36 | 9.0E-14          | -2.62  | -1.39 | 3.7E-14          |
| 1810055G02Rik  | 2101   | 1.65  | 0.73  | 3.2E-09          | 1.60   | 0.68  | 2.9E-08          |
| 2210016L21Rik  | 2072   | -1.29 | -0.37 | 4.0E-08          | -1.31  | -0.39 | 4.2E-09          |
| 2310011J03Rik  | 1664   | 1.77  | 0.82  | 3.7E-11          | 1.59   | 0.67  | 8.7E-08          |
| 2310022B05Rik  | 6485   | 1.28  | 0.36  | 4.5E-04          | 1.23   | 0.30  | 3.3E-03          |
| 2410002F23Rik  | 6002   | -1.43 | -0.51 | 1.2E-35          | -1.47  | -0.55 | 7.9E-41          |
| 2410004B18Rik  | 2022   | 1.51  | 0.59  | 2.0E-21          | 1.50   | 0.59  | 5.3E-21          |
| 2510002D24Rik  | 507    | -1.43 | -0.52 | 8.8E-10          | -1.47  | -0.56 | 4.6E-11          |
| 2510039O18Rik  | 2533   | 1.56  | 0.64  | 6.6E-08          | 1.42   | 0.51  | 2.6E-05          |
| 2610008E11Rik  | 7868   | -1.45 | -0.54 | 3.6E-12          | -1.37  | -0.46 | 6.1E-09          |
| 2610021A01Rik  | 2839   | 1.24  | 0.31  | 6.4E-05          | 1.32   | 0.40  | 2.1E-07          |
| 2610044O15Rik8 | 2098   | -1.26 | -0.33 | 4.1E-05          | -1.26  | -0.33 | 4.9E-05          |
| 2610301B20Rik  | 3491   | 1.40  | 0.49  | 1.0E-09          | 1.43   | 0.52  | 6.0E-11          |
| 2610507B11Rik  | 19385  | 1.31  | 0.39  | 5.8E-07          | 1.35   | 0.43  | 2.9E-08          |
| 2700049A03Rik  | 3410   | 1.24  | 0.30  | 1.7E-04          | 1.34   | 0.42  | 1.2E-07          |
| 2700062C07Rik  | 729    | -1.73 | -0.79 | 3.2E-14          | -1.89  | -0.92 | 6.2E-19          |
| 2700097O09Rik  | 2207   | 1.32  | 0.40  | 9.0E-09          | 1.39   | 0.47  | 1.4E-11          |
| 2900026A02Rik  | 3248   | 1.98  | 0.98  | 6.5E-17          | 2.00   | 1.00  | 1.9E-17          |
| 3110009E18Rik  | 124    | -1.63 | -0.71 | 4.0E-04          | -2.03  | -1.02 | 1.9E-07          |
| 3110040N11Rik  | 681    | -1.89 | -0.92 | 2.6E-28          | -1.90  | -0.93 | 1.1E-28          |

|               |       |       |       |         |       |       |         |
|---------------|-------|-------|-------|---------|-------|-------|---------|
| 3110082I17Rik | 1166  | 1.58  | 0.66  | 1.4E-04 | 1.31  | 0.39  | 3.3E-02 |
| 3110082J24Rik | 140   | -2.58 | -1.37 | 2.6E-11 | -2.49 | -1.32 | 1.3E-10 |
| 3830406C13Rik | 812   | -1.29 | -0.37 | 5.4E-03 | -1.31 | -0.39 | 3.5E-03 |
| 4921507P07Rik | 215   | 1.39  | 0.48  | 1.6E-03 | 1.43  | 0.51  | 6.9E-04 |
| 4921524J17Rik | 1645  | 1.69  | 0.76  | 3.8E-18 | 1.68  | 0.75  | 9.6E-18 |
| 4921536K21Rik | 210   | 1.50  | 0.58  | 2.3E-04 | 1.29  | 0.36  | 2.8E-02 |
| 4930430F08Rik | 1323  | 1.56  | 0.65  | 1.0E-16 | 1.64  | 0.71  | 3.0E-20 |
| 4930522L14Rik | 384   | 1.67  | 0.74  | 5.2E-12 | 1.80  | 0.85  | 1.4E-15 |
| 4930563E22Rik | 428   | -1.54 | -0.62 | 6.7E-09 | -1.43 | -0.51 | 2.2E-06 |
| 4930579G24Rik | 703   | 1.77  | 0.83  | 2.4E-07 | 1.74  | 0.80  | 6.0E-07 |
| 4930590J08Rik | 403   | 1.53  | 0.61  | 4.4E-05 | 1.71  | 0.77  | 2.0E-07 |
| 4931406C07Rik | 2467  | -1.28 | -0.36 | 1.8E-10 | -1.22 | -0.29 | 4.1E-07 |
| 4933407L21Rik | 155   | -1.74 | -0.80 | 1.3E-03 | -1.72 | -0.78 | 1.8E-03 |
| 5031439G07Rik | 16940 | 1.81  | 0.86  | 6.9E-20 | 1.77  | 0.83  | 1.4E-18 |
| 5430403G16Rik | 254   | 1.40  | 0.48  | 3.3E-05 | 1.67  | 0.74  | 1.4E-10 |
| 5730409E04Rik | 732   | -2.89 | -1.53 | 5.0E-11 | -2.79 | -1.48 | 2.3E-10 |
| 5730455P16Rik | 3267  | -1.37 | -0.46 | 9.0E-12 | -1.42 | -0.50 | 4.2E-14 |
| 6030458C11Rik | 3419  | -1.30 | -0.38 | 2.4E-22 | -1.22 | -0.29 | 6.6E-13 |
| 6330403K07Rik | 13572 | -1.41 | -0.50 | 4.6E-08 | -1.41 | -0.50 | 5.1E-08 |
| 6330409D20Rik | 174   | 1.62  | 0.69  | 1.5E-06 | 1.44  | 0.52  | 3.4E-04 |
| 6430548M08Rik | 4719  | 2.41  | 1.27  | 3.2E-26 | 2.40  | 1.26  | 8.8E-26 |
| 6430550D23Rik | 223   | 2.21  | 1.14  | 4.0E-20 | 2.43  | 1.28  | 1.1E-24 |
| 6430571L13Rik | 352   | 1.33  | 0.41  | 1.1E-02 | 1.40  | 0.49  | 2.2E-03 |
| 9030025P20Rik | 127   | -1.74 | -0.80 | 7.4E-10 | -1.74 | -0.80 | 5.7E-10 |
| 9130019O22Rik | 628   | 1.51  | 0.59  | 7.5E-08 | 1.67  | 0.74  | 2.1E-11 |
| 9530068E07Rik | 7749  | -1.23 | -0.30 | 7.8E-04 | -1.31 | -0.39 | 7.4E-06 |
| 9530077C05Rik | 513   | 1.48  | 0.57  | 5.6E-08 | 1.29  | 0.37  | 5.8E-04 |
| 9930021J03Rik | 5543  | -1.31 | -0.39 | 3.7E-05 | -1.23 | -0.30 | 2.2E-03 |
| 9930104L06Rik | 2337  | 1.34  | 0.43  | 6.6E-11 | 1.28  | 0.35  | 1.0E-07 |
| A130010J15Rik | 930   | -1.20 | -0.27 | 1.2E-04 | -1.26 | -0.33 | 1.1E-06 |
| A2m           | 717   | -1.38 | -0.46 | 1.5E-02 | -1.50 | -0.58 | 1.7E-03 |
| A3galt2       | 1683  | 6.97  | 2.80  | 3.7E-70 | 7.64  | 2.93  | 1.1E-76 |
| A430033K04Rik | 1960  | 1.32  | 0.41  | 1.1E-07 | 1.38  | 0.46  | 1.5E-09 |
| A630001G21Rik | 105   | -3.08 | -1.62 | 3.0E-17 | -3.32 | -1.73 | 9.0E-19 |
| A830018L16Rik | 169   | -2.39 | -1.25 | 4.0E-07 | -2.35 | -1.23 | 7.9E-07 |
| A930004D18Rik | 1042  | -1.59 | -0.67 | 5.1E-08 | -1.64 | -0.72 | 5.5E-09 |
| A930033H14Rik | 144   | -2.63 | -1.39 | 1.9E-21 | -2.72 | -1.44 | 1.1E-22 |
| AA986860      | 139   | 1.99  | 1.00  | 1.8E-08 | 2.84  | 1.50  | 1.5E-17 |
| Aaas          | 3111  | 1.61  | 0.69  | 5.9E-06 | 1.40  | 0.49  | 1.8E-03 |
| Aacs          | 3674  | 2.02  | 1.01  | 1.4E-32 | 1.86  | 0.90  | 1.4E-25 |
| Aagab         | 6156  | 1.76  | 0.82  | 1.0E-50 | 1.75  | 0.81  | 1.8E-49 |
| Aak1          | 15896 | 1.46  | 0.54  | 1.2E-04 | 1.62  | 0.70  | 5.1E-07 |
| Aard          | 215   | -1.56 | -0.64 | 6.0E-05 | -1.71 | -0.77 | 1.1E-06 |
| Aars2         | 1417  | -1.35 | -0.44 | 4.1E-04 | -1.49 | -0.57 | 2.6E-06 |
| Aasdh         | 1572  | -1.65 | -0.72 | 3.7E-16 | -1.58 | -0.66 | 7.4E-14 |
| Aasdhppt      | 2945  | 1.31  | 0.39  | 2.0E-07 | 1.35  | 0.44  | 5.7E-09 |
| Aass          | 396   | 2.23  | 1.15  | 1.7E-04 | 2.28  | 1.19  | 1.1E-04 |

|         |       |       |       |          |       |       |          |
|---------|-------|-------|-------|----------|-------|-------|----------|
| Aatk    | 1600  | -2.10 | -1.07 | 7.9E-04  | -2.11 | -1.07 | 8.0E-04  |
| Abat    | 8490  | 1.58  | 0.66  | 2.4E-08  | 1.68  | 0.75  | 1.7E-10  |
| Abca3   | 6623  | 1.32  | 0.40  | 3.3E-03  | 1.34  | 0.43  | 1.7E-03  |
| Abca4   | 342   | -1.60 | -0.68 | 6.6E-03  | -1.47 | -0.56 | 3.0E-02  |
| Abca5   | 3173  | 2.02  | 1.02  | 3.1E-09  | 2.52  | 1.33  | 4.1E-15  |
| Abca7   | 4344  | 2.59  | 1.37  | 3.7E-24  | 2.58  | 1.37  | 7.2E-24  |
| Abca9   | 1695  | -1.86 | -0.90 | 6.9E-06  | -1.71 | -0.78 | 1.2E-04  |
| Abcb10  | 2247  | -1.24 | -0.30 | 1.3E-03  | -1.33 | -0.41 | 1.0E-05  |
| Abcb6   | 130   | 1.52  | 0.60  | 5.4E-03  | 1.36  | 0.44  | 4.8E-02  |
| Abcb7   | 4367  | -1.46 | -0.55 | 3.7E-08  | -1.41 | -0.50 | 6.6E-07  |
| Abcb8   | 1836  | -2.93 | -1.55 | 1.2E-109 | -3.17 | -1.67 | 1.9E-126 |
| Abcb9   | 338   | 1.78  | 0.83  | 2.6E-08  | 1.73  | 0.79  | 1.3E-07  |
| Abcc5   | 13864 | -1.55 | -0.63 | 1.8E-04  | -1.31 | -0.39 | 2.7E-02  |
| Abcc9   | 1497  | -1.57 | -0.65 | 4.0E-05  | -1.51 | -0.60 | 1.8E-04  |
| Abcd2   | 4781  | 1.82  | 0.86  | 5.0E-11  | 1.72  | 0.79  | 2.5E-09  |
| Abcd4   | 2037  | 1.37  | 0.45  | 6.0E-04  | 1.33  | 0.41  | 1.8E-03  |
| Abce1   | 14484 | -1.25 | -0.32 | 2.2E-03  | -1.20 | -0.26 | 1.3E-02  |
| Abcf1   | 11952 | 1.56  | 0.64  | 3.4E-11  | 1.44  | 0.53  | 7.0E-08  |
| Abcf3   | 5371  | 1.49  | 0.58  | 7.5E-22  | 1.46  | 0.54  | 2.8E-19  |
| Abcg5   | 148   | -2.12 | -1.08 | 2.2E-07  | -2.08 | -1.06 | 4.3E-07  |
| Abhd10  | 2112  | -1.33 | -0.41 | 2.8E-08  | -1.35 | -0.43 | 8.5E-09  |
| Abhd11  | 1511  | 1.31  | 0.39  | 2.4E-10  | 1.29  | 0.37  | 3.2E-09  |
| Abhd12  | 3115  | 1.31  | 0.39  | 3.8E-10  | 1.31  | 0.38  | 1.0E-09  |
| Abhd13  | 3905  | 1.25  | 0.33  | 3.9E-05  | 1.25  | 0.32  | 5.3E-05  |
| Abhd14a | 1728  | 1.46  | 0.54  | 7.3E-11  | 1.41  | 0.49  | 5.1E-09  |
| Abhd14b | 827   | 1.95  | 0.96  | 3.1E-07  | 2.14  | 1.10  | 5.2E-09  |
| Abhd15  | 321   | 6.55  | 2.71  | 7.9E-82  | 6.24  | 2.64  | 5.7E-77  |
| Abhd16a | 1764  | -2.00 | -1.00 | 1.9E-26  | -2.21 | -1.14 | 5.6E-34  |
| Abhd17a | 3178  | 1.55  | 0.63  | 6.7E-11  | 1.48  | 0.56  | 1.0E-08  |
| Abhd17b | 3631  | 1.25  | 0.32  | 1.1E-04  | 1.20  | 0.26  | 2.3E-03  |
| Abhd18  | 124   | 2.70  | 1.43  | 9.7E-04  | 2.44  | 1.29  | 3.3E-03  |
| Abhd2   | 8026  | 1.26  | 0.34  | 9.8E-04  | 1.29  | 0.37  | 3.0E-04  |
| Abhd3   | 263   | 3.84  | 1.94  | 2.2E-29  | 3.78  | 1.92  | 1.4E-28  |
| Abhd4   | 3131  | 1.34  | 0.42  | 3.3E-06  | 1.31  | 0.39  | 1.8E-05  |
| Abhd5   | 1217  | -1.31 | -0.39 | 1.0E-03  | -1.36 | -0.44 | 1.9E-04  |
| Abhd6   | 1224  | 1.86  | 0.90  | 2.5E-23  | 1.93  | 0.95  | 7.3E-26  |
| Abhd8   | 5131  | 1.90  | 0.93  | 3.5E-32  | 1.83  | 0.87  | 8.2E-29  |
| Abi3    | 103   | -1.42 | -0.51 | 1.5E-02  | -1.43 | -0.52 | 1.4E-02  |
| Abi2    | 6428  | -1.33 | -0.42 | 1.3E-03  | -1.25 | -0.33 | 1.4E-02  |
| Ablim1  | 4502  | -1.34 | -0.43 | 2.6E-03  | -1.25 | -0.33 | 2.4E-02  |
| Ablim2  | 250   | 2.11  | 1.08  | 9.5E-03  | 2.25  | 1.17  | 4.8E-03  |
| Abr     | 12513 | -1.60 | -0.68 | 5.8E-06  | -1.66 | -0.73 | 1.3E-06  |
| Abracl  | 3562  | -1.63 | -0.70 | 9.6E-06  | -1.72 | -0.78 | 7.0E-07  |
| Abraxa1 | 745   | -1.24 | -0.31 | 3.1E-03  | -1.26 | -0.33 | 1.6E-03  |
| Abt1    | 1337  | 1.36  | 0.45  | 8.3E-05  | 1.28  | 0.35  | 2.1E-03  |
| Abtb2   | 2483  | 2.20  | 1.14  | 1.8E-38  | 2.19  | 1.13  | 8.4E-38  |
| Acaa1b  | 135   | 2.59  | 1.37  | 2.2E-14  | 2.91  | 1.54  | 2.0E-17  |

|        |        |        |       |         |        |       |         |
|--------|--------|--------|-------|---------|--------|-------|---------|
| Acaa2  | 2091   | 1.42   | 0.51  | 2.5E-04 | 1.41   | 0.50  | 3.3E-04 |
| Acacb  | 599    | 3.69   | 1.88  | 2.6E-51 | 3.64   | 1.86  | 5.1E-50 |
| Acad12 | 162    | -1.35  | -0.43 | 4.5E-04 | -1.54  | -0.62 | 2.6E-07 |
| Acadm  | 4036   | 1.80   | 0.85  | 7.8E-53 | 1.92   | 0.94  | 3.2E-64 |
| Acan   | 1045   | -6.91  | -2.79 | 4.2E-03 | -5.36  | -2.42 | 1.4E-02 |
| Acap2  | 8163   | 1.68   | 0.75  | 6.4E-24 | 1.79   | 0.84  | 7.9E-30 |
| Acap3  | 6900   | 1.42   | 0.50  | 2.2E-04 | 1.35   | 0.43  | 1.8E-03 |
| Acbd4  | 451    | 3.12   | 1.64  | 5.8E-30 | 3.09   | 1.63  | 2.9E-29 |
| Accs   | 1681   | -1.34  | -0.42 | 1.1E-05 | -1.31  | -0.39 | 6.0E-05 |
| Acd    | 3697   | 1.91   | 0.93  | 2.1E-34 | 1.82   | 0.86  | 1.4E-29 |
| Acer3  | 1362   | 1.49   | 0.57  | 5.2E-08 | 1.56   | 0.64  | 9.1E-10 |
| Ache   | 892    | 1.73   | 0.79  | 1.1E-03 | 1.82   | 0.87  | 3.1E-04 |
| Acin1  | 25484  | -1.41  | -0.49 | 4.6E-05 | -1.52  | -0.60 | 5.6E-07 |
| Ackr1  | 1403   | 2.20   | 1.14  | 8.0E-09 | 2.19   | 1.13  | 1.0E-08 |
| Ackr3  | 2346   | -1.31  | -0.39 | 9.9E-03 | -1.40  | -0.49 | 1.0E-03 |
| Acly   | 42598  | 1.52   | 0.60  | 2.4E-17 | 1.49   | 0.58  | 5.5E-16 |
| Aco1   | 9220   | 1.81   | 0.86  | 7.4E-27 | 1.74   | 0.80  | 2.2E-23 |
| Acot1  | 1481   | -1.26  | -0.34 | 6.0E-05 | -1.24  | -0.31 | 2.1E-04 |
| Acot13 | 852    | 1.40   | 0.48  | 1.3E-05 | 1.43   | 0.51  | 3.4E-06 |
| Acot2  | 211    | -2.95  | -1.56 | 1.6E-26 | -2.72  | -1.45 | 6.1E-23 |
| Acot6  | 253    | -3.52  | -1.81 | 7.4E-35 | -3.63  | -1.86 | 1.9E-36 |
| Acot7  | 4558   | 1.22   | 0.28  | 2.8E-02 | 1.27   | 0.34  | 8.2E-03 |
| Acot8  | 990    | 1.57   | 0.65  | 7.1E-12 | 1.51   | 0.60  | 3.7E-10 |
| Acot9  | 1147   | -1.46  | -0.55 | 7.6E-05 | -1.37  | -0.46 | 1.3E-03 |
| Acox1  | 7899   | 1.33   | 0.41  | 5.2E-11 | 1.32   | 0.40  | 2.4E-10 |
| Acp2   | 4785   | -1.74  | -0.80 | 2.5E-32 | -1.73  | -0.79 | 2.1E-31 |
| Acp6   | 1651   | 2.05   | 1.04  | 3.9E-48 | 2.10   | 1.07  | 9.5E-51 |
| Acrbp  | 689    | -1.47  | -0.55 | 9.7E-05 | -1.47  | -0.56 | 9.8E-05 |
| Acsbg1 | 622    | -1.39  | -0.47 | 8.5E-03 | -1.62  | -0.70 | 7.1E-05 |
| Acsf3  | 819    | -2.85  | -1.51 | 1.8E-57 | -3.08  | -1.62 | 7.1E-66 |
| Acsl1  | 2150   | 3.11   | 1.64  | 6.5E-40 | 3.28   | 1.72  | 1.3E-43 |
| Acsl3  | 9041   | 1.51   | 0.59  | 3.9E-11 | 1.47   | 0.55  | 8.6E-10 |
| Acsl4  | 4014   | 1.62   | 0.69  | 1.5E-12 | 1.66   | 0.73  | 6.7E-14 |
| Acsl5  | 1132   | -1.93  | -0.95 | 1.9E-10 | -1.92  | -0.94 | 2.3E-10 |
| Acss1  | 3013   | -1.30  | -0.38 | 1.2E-02 | -1.33  | -0.41 | 7.0E-03 |
| Acss2  | 2917   | 2.04   | 1.03  | 5.3E-76 | 2.05   | 1.03  | 2.3E-76 |
| Acta1  | 391    | -15.56 | -3.96 | 1.5E-04 | -9.63  | -3.27 | 2.1E-03 |
| Actb   | 107135 | -1.36  | -0.44 | 2.4E-08 | -1.48  | -0.57 | 4.5E-13 |
| Actc1  | 906    | -21.26 | -4.41 | 7.1E-04 | -12.85 | -3.68 | 5.4E-03 |
| Actl6a | 6126   | -1.28  | -0.36 | 1.1E-02 | -1.41  | -0.50 | 3.6E-04 |
| Actn4  | 15736  | 1.43   | 0.52  | 3.2E-05 | 1.37   | 0.46  | 2.6E-04 |
| Actr10 | 9766   | 1.26   | 0.33  | 1.7E-06 | 1.28   | 0.36  | 1.5E-07 |
| Actr1b | 10314  | 1.34   | 0.42  | 2.0E-11 | 1.25   | 0.33  | 3.5E-07 |
| Actr3b | 1001   | 1.98   | 0.99  | 3.9E-11 | 1.89   | 0.92  | 8.7E-10 |
| Actr5  | 1604   | 1.53   | 0.61  | 2.4E-13 | 1.52   | 0.60  | 8.0E-13 |
| Actr6  | 2081   | 1.36   | 0.44  | 3.1E-08 | 1.41   | 0.49  | 4.1E-10 |
| Actr8  | 3093   | -1.56  | -0.64 | 3.6E-27 | -1.61  | -0.68 | 2.0E-30 |

|          |       |       |       |         |       |       |         |
|----------|-------|-------|-------|---------|-------|-------|---------|
| Acvr1c   | 155   | 2.57  | 1.36  | 5.6E-09 | 2.50  | 1.32  | 1.6E-08 |
| Acvr2b   | 2847  | -2.10 | -1.07 | 3.0E-05 | -1.80 | -0.85 | 1.1E-03 |
| Acy1     | 1770  | 1.70  | 0.77  | 2.3E-17 | 1.68  | 0.75  | 1.2E-16 |
| Acyp1    | 881   | 1.26  | 0.34  | 2.2E-03 | 1.19  | 0.25  | 2.9E-02 |
| Ada      | 284   | 1.30  | 0.38  | 1.9E-02 | 1.35  | 0.44  | 7.7E-03 |
| Adal     | 1824  | -1.54 | -0.62 | 3.2E-17 | -1.40 | -0.49 | 5.7E-11 |
| Adam11   | 2711  | -1.52 | -0.61 | 1.0E-03 | -1.37 | -0.46 | 1.5E-02 |
| Adam12   | 911   | -2.63 | -1.39 | 5.6E-07 | -2.60 | -1.38 | 7.7E-07 |
| Adam15   | 3573  | 3.00  | 1.58  | 9.2E-52 | 2.93  | 1.55  | 1.2E-49 |
| Adam19   | 3857  | -1.57 | -0.65 | 1.3E-07 | -1.46 | -0.55 | 1.3E-05 |
| Adam22   | 4153  | -1.60 | -0.68 | 1.7E-04 | -1.45 | -0.54 | 3.2E-03 |
| Adam33   | 231   | -2.35 | -1.23 | 1.8E-03 | -2.49 | -1.32 | 8.6E-04 |
| Adam8    | 1522  | 2.38  | 1.25  | 5.7E-17 | 2.21  | 1.14  | 2.4E-14 |
| Adam9    | 4828  | 1.66  | 0.73  | 1.5E-44 | 1.65  | 0.72  | 1.2E-43 |
| Adamts1  | 1953  | -1.77 | -0.82 | 4.0E-04 | -1.74 | -0.80 | 6.3E-04 |
| Adamts12 | 2424  | -1.77 | -0.83 | 2.4E-04 | -1.65 | -0.72 | 1.5E-03 |
| Adamts14 | 272   | -1.71 | -0.77 | 3.0E-02 | -1.75 | -0.81 | 2.4E-02 |
| Adamts15 | 1767  | -1.70 | -0.76 | 1.0E-02 | -1.76 | -0.82 | 5.8E-03 |
| Adamts18 | 484   | -3.16 | -1.66 | 2.9E-12 | -2.65 | -1.41 | 4.3E-09 |
| Adamts2  | 893   | -2.09 | -1.06 | 5.1E-03 | -2.11 | -1.07 | 4.8E-03 |
| Adamts20 | 2579  | 1.69  | 0.76  | 3.0E-07 | 1.91  | 0.94  | 1.9E-10 |
| Adamts3  | 803   | -1.39 | -0.48 | 1.4E-02 | -1.32 | -0.40 | 4.5E-02 |
| Adamts5  | 815   | -2.10 | -1.07 | 4.1E-04 | -2.04 | -1.03 | 7.0E-04 |
| Adamts8  | 138   | -1.90 | -0.93 | 1.4E-04 | -1.96 | -0.97 | 7.6E-05 |
| Adamtsl1 | 1146  | -1.93 | -0.95 | 3.5E-03 | -1.71 | -0.77 | 2.0E-02 |
| Adamtsl2 | 585   | -1.51 | -0.59 | 7.3E-06 | -1.63 | -0.71 | 6.6E-08 |
| Adamtsl3 | 186   | -3.07 | -1.62 | 1.8E-04 | -2.33 | -1.22 | 6.1E-03 |
| Adap2    | 138   | -1.48 | -0.57 | 1.0E-05 | -1.52 | -0.60 | 2.5E-06 |
| Adar     | 8383  | 1.32  | 0.40  | 3.5E-04 | 1.33  | 0.41  | 1.9E-04 |
| Adarb1   | 2417  | 1.89  | 0.92  | 2.6E-18 | 1.90  | 0.92  | 2.4E-18 |
| Adck1    | 1097  | -1.58 | -0.66 | 8.4E-16 | -1.54 | -0.63 | 3.0E-14 |
| Adcy3    | 1057  | -1.69 | -0.76 | 1.4E-08 | -1.81 | -0.86 | 1.1E-10 |
| Adcy4    | 713   | -1.48 | -0.57 | 1.9E-02 | -1.47 | -0.56 | 2.3E-02 |
| Adcy7    | 424   | -1.57 | -0.65 | 5.6E-04 | -1.46 | -0.55 | 4.6E-03 |
| Adcy9    | 825   | 1.95  | 0.96  | 8.7E-06 | 2.04  | 1.03  | 1.8E-06 |
| Adcyap1  | 725   | -2.68 | -1.42 | 2.1E-15 | -2.78 | -1.48 | 1.6E-16 |
| Add2     | 16044 | -1.89 | -0.92 | 2.8E-06 | -1.87 | -0.90 | 4.8E-06 |
| Add3     | 8147  | 1.95  | 0.96  | 4.8E-14 | 1.96  | 0.97  | 3.6E-14 |
| Adgra1   | 539   | -1.85 | -0.89 | 4.2E-06 | -1.71 | -0.78 | 6.8E-05 |
| Adgra3   | 7782  | -1.32 | -0.41 | 1.3E-08 | -1.38 | -0.46 | 7.6E-11 |
| Adgrb1   | 4790  | -1.43 | -0.52 | 3.8E-02 | -1.52 | -0.60 | 1.5E-02 |
| Adgrb2   | 7542  | 1.56  | 0.64  | 2.6E-04 | 1.58  | 0.66  | 1.8E-04 |
| Adgre5   | 1171  | -1.53 | -0.61 | 4.6E-04 | -1.62 | -0.69 | 6.3E-05 |
| Adgrf5   | 2348  | -1.37 | -0.45 | 2.5E-05 | -1.27 | -0.34 | 1.7E-03 |
| Adgrg1   | 13224 | -2.36 | -1.24 | 6.4E-16 | -2.52 | -1.33 | 2.9E-18 |
| Adgrg2   | 336   | -2.54 | -1.34 | 4.5E-08 | -2.07 | -1.05 | 2.6E-05 |
| Adgrg6   | 1070  | -2.33 | -1.22 | 2.5E-04 | -2.01 | -1.00 | 3.1E-03 |

|          |       |       |       |         |       |       |         |
|----------|-------|-------|-------|---------|-------|-------|---------|
| Adgrl2   | 16496 | -1.34 | -0.42 | 2.9E-05 | -1.32 | -0.40 | 8.8E-05 |
| Adgrv1   | 9048  | 1.65  | 0.73  | 2.2E-03 | 1.93  | 0.95  | 5.2E-05 |
| Adi1     | 1022  | -2.04 | -1.03 | 1.2E-23 | -2.31 | -1.21 | 3.8E-32 |
| Adipor2  | 9283  | 1.50  | 0.59  | 8.5E-31 | 1.43  | 0.52  | 2.1E-24 |
| Adk      | 3332  | 1.30  | 0.37  | 1.4E-02 | 1.30  | 0.38  | 1.4E-02 |
| Adnp     | 233   | -1.63 | -0.71 | 4.0E-07 | -1.58 | -0.66 | 3.0E-06 |
| Adora2a  | 296   | -1.25 | -0.32 | 4.9E-02 | -1.36 | -0.45 | 4.9E-03 |
| Adprs    | 1967  | -1.31 | -0.39 | 2.8E-06 | -1.36 | -0.44 | 6.9E-08 |
| Adra2a   | 747   | -1.66 | -0.73 | 2.3E-09 | -2.01 | -1.01 | 1.1E-16 |
| Adrb1    | 136   | 2.96  | 1.57  | 1.6E-19 | 2.57  | 1.36  | 4.2E-15 |
| Adss     | 9487  | 1.32  | 0.40  | 2.7E-07 | 1.33  | 0.41  | 1.2E-07 |
| Aen      | 4571  | 1.97  | 0.98  | 5.6E-47 | 1.90  | 0.93  | 3.4E-42 |
| Afap1l1  | 1070  | -1.37 | -0.45 | 2.9E-03 | -1.30 | -0.38 | 1.4E-02 |
| Aff1     | 2450  | 2.00  | 1.00  | 1.3E-17 | 2.09  | 1.06  | 1.3E-19 |
| Aff3     | 5158  | -1.41 | -0.49 | 2.2E-05 | -1.35 | -0.43 | 2.3E-04 |
| Afg1l    | 270   | -1.72 | -0.78 | 1.5E-12 | -1.59 | -0.67 | 1.7E-09 |
| Afg3l1   | 4163  | -1.56 | -0.64 | 4.5E-12 | -1.75 | -0.80 | 1.9E-18 |
| Afg3l2   | 6049  | 1.76  | 0.82  | 6.4E-25 | 1.82  | 0.86  | 1.9E-27 |
| Afmid    | 234   | 2.34  | 1.23  | 3.4E-15 | 2.19  | 1.13  | 5.6E-13 |
| Aftph    | 6785  | 1.51  | 0.59  | 2.3E-10 | 1.64  | 0.71  | 1.3E-14 |
| Aga      | 449   | -1.96 | -0.97 | 3.0E-23 | -1.92 | -0.94 | 5.7E-22 |
| Agbl5    | 4182  | -1.54 | -0.62 | 4.6E-13 | -1.60 | -0.68 | 2.2E-15 |
| Agfg1    | 11006 | 1.30  | 0.38  | 3.7E-05 | 1.39  | 0.48  | 1.5E-07 |
| Agfg2    | 2354  | 2.43  | 1.28  | 1.1E-24 | 2.10  | 1.07  | 1.9E-17 |
| Aggf1    | 6715  | 1.26  | 0.33  | 4.6E-06 | 1.17  | 0.23  | 1.9E-03 |
| Agk      | 1373  | -1.77 | -0.83 | 2.0E-36 | -1.76 | -0.81 | 4.3E-35 |
| Agl      | 6683  | 1.28  | 0.36  | 3.8E-05 | 1.39  | 0.48  | 2.6E-08 |
| Ago3     | 5603  | 1.60  | 0.68  | 3.5E-07 | 1.90  | 0.92  | 1.9E-12 |
| Agpat1   | 6364  | 1.40  | 0.48  | 1.4E-07 | 1.31  | 0.39  | 2.9E-05 |
| Agpat2   | 179   | -1.97 | -0.98 | 3.5E-05 | -2.09 | -1.06 | 6.7E-06 |
| Agpat3   | 4554  | -1.46 | -0.54 | 3.6E-05 | -1.49 | -0.58 | 1.0E-05 |
| Agpat5   | 5028  | 1.37  | 0.46  | 4.5E-11 | 1.41  | 0.50  | 6.3E-13 |
| Agtr2    | 720   | -6.44 | -2.69 | 2.7E-04 | -4.45 | -2.15 | 4.1E-03 |
| Agtrap   | 1685  | 2.30  | 1.20  | 3.0E-18 | 2.08  | 1.06  | 2.0E-14 |
| Ahcyl2   | 4631  | 1.49  | 0.57  | 2.9E-28 | 1.51  | 0.59  | 4.6E-30 |
| Ahi1     | 10423 | 1.57  | 0.65  | 1.1E-04 | 1.60  | 0.68  | 5.6E-05 |
| Ahnak    | 9132  | -3.07 | -1.62 | 1.2E-07 | -2.64 | -1.40 | 5.6E-06 |
| Ahrr     | 201   | -3.20 | -1.68 | 4.7E-26 | -2.64 | -1.40 | 1.8E-18 |
| Ahsa2    | 8656  | -1.26 | -0.33 | 6.6E-04 | -1.22 | -0.29 | 3.4E-03 |
| Al413582 | 586   | 2.61  | 1.38  | 1.1E-50 | 2.78  | 1.48  | 4.0E-57 |
| Al429214 | 364   | 1.39  | 0.47  | 3.9E-07 | 1.44  | 0.52  | 2.1E-08 |
| Al661453 | 130   | -2.15 | -1.10 | 3.0E-03 | -2.03 | -1.02 | 6.7E-03 |
| Al837181 | 1415  | -1.70 | -0.77 | 1.5E-15 | -1.85 | -0.89 | 1.5E-20 |
| Al987944 | 964   | 1.70  | 0.76  | 8.1E-15 | 1.79  | 0.84  | 1.3E-17 |
| Aida     | 7488  | 1.42  | 0.50  | 1.4E-14 | 1.46  | 0.54  | 1.3E-16 |
| Aifm1    | 5036  | 1.53  | 0.62  | 8.5E-11 | 1.46  | 0.55  | 1.0E-08 |
| Aifm2    | 725   | 2.47  | 1.30  | 1.0E-17 | 2.10  | 1.07  | 2.9E-12 |



|          |       |       |       |         |       |       |         |
|----------|-------|-------|-------|---------|-------|-------|---------|
| Aifm3    | 718   | -1.38 | -0.47 | 4.1E-03 | -1.60 | -0.68 | 2.1E-05 |
| Aim2     | 1185  | -1.50 | -0.59 | 1.6E-03 | -1.79 | -0.84 | 3.7E-06 |
| Aimp2    | 1731  | -1.23 | -0.30 | 9.2E-04 | -1.32 | -0.40 | 8.4E-06 |
| Ak1      | 1321  | -1.46 | -0.54 | 2.0E-04 | -1.41 | -0.50 | 7.1E-04 |
| Ak2      | 7116  | 1.41  | 0.49  | 2.2E-04 | 1.27  | 0.34  | 1.2E-02 |
| Ak3      | 4309  | -1.28 | -0.35 | 1.5E-04 | -1.34 | -0.42 | 4.4E-06 |
| Ak6      | 1427  | 1.50  | 0.58  | 1.4E-07 | 1.48  | 0.57  | 3.3E-07 |
| Akap1    | 5233  | 1.78  | 0.83  | 3.8E-28 | 1.68  | 0.75  | 3.4E-23 |
| Akap10   | 1782  | -1.54 | -0.62 | 3.6E-14 | -1.47 | -0.55 | 2.4E-11 |
| Akap13   | 5952  | 1.25  | 0.32  | 1.5E-02 | 1.46  | 0.55  | 1.8E-05 |
| Akap17b  | 2484  | 1.38  | 0.46  | 3.0E-07 | 1.43  | 0.51  | 1.3E-08 |
| Akap5    | 1493  | 1.53  | 0.62  | 2.5E-07 | 1.53  | 0.61  | 3.1E-07 |
| Akap7    | 976   | -1.99 | -0.99 | 9.9E-22 | -2.16 | -1.11 | 5.8E-27 |
| Akap8    | 17422 | -1.26 | -0.34 | 3.2E-05 | -1.29 | -0.37 | 6.1E-06 |
| Akap8l   | 8525  | 1.60  | 0.67  | 5.9E-12 | 1.61  | 0.69  | 2.6E-12 |
| Akap9    | 18776 | -2.30 | -1.20 | 5.3E-09 | -1.85 | -0.89 | 2.4E-05 |
| Akip1    | 342   | -1.26 | -0.34 | 1.6E-02 | -1.50 | -0.58 | 1.5E-05 |
| Akirin1  | 7540  | 1.59  | 0.67  | 2.3E-16 | 1.54  | 0.62  | 2.1E-14 |
| Akr1b10  | 542   | 1.79  | 0.84  | 9.7E-07 | 1.70  | 0.77  | 8.8E-06 |
| Akr1b3   | 3895  | 1.43  | 0.51  | 1.5E-03 | 1.34  | 0.43  | 1.0E-02 |
| Akr7a5   | 1487  | 1.51  | 0.60  | 1.6E-07 | 1.41  | 0.50  | 1.4E-05 |
| Akt1     | 15951 | -1.40 | -0.48 | 5.5E-09 | -1.45 | -0.54 | 4.7E-11 |
| Akt1s1   | 2273  | -2.05 | -1.03 | 7.0E-38 | -2.20 | -1.14 | 1.3E-45 |
| Akt2     | 4906  | -2.03 | -1.02 | 2.9E-50 | -2.08 | -1.06 | 5.6E-54 |
| Aktip    | 5460  | 1.47  | 0.56  | 2.3E-17 | 1.47  | 0.55  | 3.8E-17 |
| Aldh16a1 | 1460  | -1.64 | -0.72 | 4.0E-08 | -1.77 | -0.82 | 2.7E-10 |
| Aldh18a1 | 9896  | 1.58  | 0.66  | 5.9E-12 | 1.45  | 0.54  | 2.7E-08 |
| Aldh1b1  | 643   | 2.12  | 1.08  | 1.4E-15 | 2.13  | 1.09  | 8.6E-16 |
| Aldh2    | 6283  | 1.35  | 0.43  | 1.2E-03 | 1.30  | 0.38  | 4.9E-03 |
| Aldh3a2  | 1949  | -1.37 | -0.46 | 1.4E-16 | -1.37 | -0.46 | 2.5E-16 |
| Aldh4a1  | 1721  | 2.23  | 1.16  | 6.8E-42 | 2.16  | 1.11  | 1.6E-38 |
| Aldh6a1  | 3320  | 1.56  | 0.64  | 6.0E-09 | 1.63  | 0.71  | 1.4E-10 |
| Aldh7a1  | 5826  | 1.28  | 0.36  | 5.4E-04 | 1.24  | 0.31  | 3.3E-03 |
| Aldoa    | 19582 | 1.32  | 0.40  | 1.1E-03 | 1.50  | 0.59  | 1.5E-04 |
| Aldoa    | 19582 | 1.32  | 0.40  | 1.1E-03 | 1.25  | 0.32  | 1.2E-02 |
| Aldoa    | 251   | 1.64  | 0.71  | 3.3E-06 | 1.50  | 0.59  | 1.5E-04 |
| Aldoa    | 251   | 1.64  | 0.71  | 3.3E-06 | 1.25  | 0.32  | 1.2E-02 |
| Alg13    | 3561  | 2.06  | 1.05  | 1.3E-25 | 1.97  | 0.98  | 2.2E-22 |
| Alg3     | 980   | -1.23 | -0.30 | 3.8E-04 | -1.33 | -0.41 | 5.3E-07 |
| Alg8     | 1473  | -1.74 | -0.80 | 4.9E-13 | -1.78 | -0.83 | 5.6E-14 |
| Alkbh1   | 2871  | -1.37 | -0.46 | 5.8E-20 | -1.40 | -0.49 | 1.7E-22 |
| Alkbh3   | 782   | -1.69 | -0.76 | 5.4E-14 | -1.52 | -0.60 | 3.5E-09 |
| Alkbh4   | 826   | 1.41  | 0.50  | 5.5E-08 | 1.23  | 0.29  | 1.9E-03 |
| Alkbh5   | 7600  | 1.28  | 0.35  | 2.0E-03 | 1.18  | 0.24  | 4.6E-02 |
| Alkbh6   | 1091  | 1.46  | 0.55  | 2.1E-09 | 1.37  | 0.45  | 1.1E-06 |
| Alpl     | 811   | -1.66 | -0.73 | 1.2E-05 | -1.64 | -0.71 | 2.1E-05 |
| Als2     | 6429  | 1.63  | 0.70  | 3.2E-30 | 1.72  | 0.78  | 4.6E-37 |

|          |       |       |       |         |       |       |         |
|----------|-------|-------|-------|---------|-------|-------|---------|
| Als2cl   | 363   | 1.41  | 0.50  | 1.0E-02 | 1.53  | 0.61  | 1.5E-03 |
| Alx4     | 2332  | -2.78 | -1.47 | 2.2E-03 | -3.42 | -1.77 | 1.9E-04 |
| Alyref   | 6003  | -1.29 | -0.36 | 5.2E-04 | -1.39 | -0.47 | 5.0E-06 |
| Amacr    | 350   | -2.04 | -1.03 | 1.3E-19 | -2.04 | -1.03 | 1.7E-19 |
| Amer3    | 1277  | -2.39 | -1.26 | 7.9E-05 | -2.40 | -1.26 | 7.3E-05 |
| Amfr     | 7509  | -1.43 | -0.52 | 1.6E-12 | -1.50 | -0.58 | 8.6E-16 |
| Amigo1   | 3006  | 1.68  | 0.75  | 1.2E-08 | 1.76  | 0.82  | 4.0E-10 |
| Amigo3   | 338   | 2.13  | 1.09  | 4.8E-22 | 2.06  | 1.04  | 4.4E-20 |
| Ammecr1  | 2133  | -1.26 | -0.33 | 1.1E-03 | -1.24 | -0.31 | 2.6E-03 |
| Ammecr1l | 5365  | -1.22 | -0.29 | 7.3E-04 | -1.26 | -0.34 | 5.8E-05 |
| Amn1     | 2385  | -1.55 | -0.63 | 2.5E-09 | -1.42 | -0.50 | 2.9E-06 |
| Amotl1   | 8448  | -1.60 | -0.68 | 2.3E-08 | -1.48 | -0.56 | 4.7E-06 |
| Amotl2   | 6480  | -1.60 | -0.68 | 8.2E-11 | -1.72 | -0.78 | 4.1E-14 |
| Ampd3    | 174   | -3.19 | -1.67 | 4.5E-11 | -3.04 | -1.61 | 2.9E-10 |
| Anapc1   | 19417 | -1.36 | -0.45 | 1.8E-04 | -1.27 | -0.35 | 4.3E-03 |
| Anapc11  | 3450  | -1.20 | -0.26 | 6.8E-03 | -1.31 | -0.39 | 3.1E-05 |
| Anapc15  | 2482  | -1.85 | -0.88 | 1.6E-29 | -1.85 | -0.89 | 7.2E-30 |
| Anapc7   | 6014  | 1.27  | 0.34  | 9.3E-08 | 1.24  | 0.31  | 1.8E-06 |
| Angel1   | 1761  | 2.10  | 1.07  | 4.7E-41 | 2.11  | 1.08  | 9.2E-42 |
| Angel2   | 4953  | -2.17 | -1.12 | 1.7E-48 | -2.19 | -1.13 | 2.2E-49 |
| Angpt1   | 1607  | -1.57 | -0.65 | 5.2E-05 | -1.48 | -0.56 | 6.1E-04 |
| Angpt2   | 223   | -2.28 | -1.19 | 6.3E-10 | -2.33 | -1.22 | 1.6E-10 |
| Angptl1  | 297   | -7.05 | -2.82 | 8.4E-05 | -5.19 | -2.38 | 1.1E-03 |
| Angptl4  | 809   | -2.71 | -1.44 | 1.8E-11 | -2.77 | -1.47 | 6.0E-12 |
| Ank1     | 889   | -1.75 | -0.80 | 3.2E-04 | -1.81 | -0.86 | 1.2E-04 |
| Ankhd1   | 9952  | 1.34  | 0.42  | 2.7E-02 | 1.63  | 0.70  | 1.3E-04 |
| Ankib1   | 7029  | 1.34  | 0.42  | 1.1E-05 | 1.41  | 0.49  | 2.0E-07 |
| Ankle2   | 4642  | -1.42 | -0.50 | 3.2E-24 | -1.46 | -0.55 | 1.8E-28 |
| Ankrd12  | 8990  | 1.43  | 0.52  | 7.3E-03 | 1.69  | 0.76  | 6.4E-05 |
| Ankrd13a | 9540  | 2.21  | 1.15  | 3.1E-40 | 2.08  | 1.06  | 1.8E-34 |
| Ankrd13d | 1571  | 1.41  | 0.50  | 1.1E-04 | 1.40  | 0.49  | 1.6E-04 |
| Ankrd24  | 1925  | -1.27 | -0.34 | 1.3E-02 | -1.25 | -0.32 | 2.5E-02 |
| Ankrd27  | 3783  | 1.48  | 0.56  | 4.2E-19 | 1.49  | 0.58  | 4.6E-20 |
| Ankrd28  | 8082  | 1.30  | 0.38  | 1.1E-04 | 1.33  | 0.42  | 1.9E-05 |
| Ankrd33b | 129   | 1.81  | 0.86  | 1.2E-06 | 1.79  | 0.84  | 2.7E-06 |
| Ankrd34a | 518   | 2.58  | 1.37  | 2.6E-11 | 2.73  | 1.45  | 1.6E-12 |
| Ankrd34b | 450   | 5.40  | 2.43  | 7.8E-20 | 6.84  | 2.77  | 2.8E-25 |
| Ankrd35  | 295   | 4.05  | 2.02  | 5.4E-21 | 3.63  | 1.86  | 5.3E-18 |
| Ankrd39  | 785   | 1.77  | 0.83  | 6.4E-21 | 1.78  | 0.83  | 3.4E-21 |
| Ankrd42  | 1551  | 2.04  | 1.03  | 1.1E-33 | 2.25  | 1.17  | 2.4E-43 |
| Ankrd44  | 2666  | -1.88 | -0.91 | 1.8E-11 | -1.73 | -0.79 | 8.1E-09 |
| Ankrd54  | 2350  | 1.55  | 0.63  | 4.7E-11 | 1.42  | 0.51  | 1.2E-07 |
| Ankrd9   | 290   | 1.82  | 0.86  | 2.2E-09 | 1.65  | 0.72  | 8.4E-07 |
| Anks6    | 1065  | 1.54  | 0.62  | 2.2E-08 | 1.42  | 0.50  | 7.9E-06 |
| Ankzf1   | 2571  | 1.33  | 0.42  | 2.0E-12 | 1.37  | 0.45  | 2.9E-14 |
| Anln     | 4143  | -1.43 | -0.52 | 7.3E-04 | -1.42 | -0.50 | 1.1E-03 |
| Ano1     | 1278  | -2.06 | -1.04 | 6.9E-10 | -2.29 | -1.20 | 9.7E-13 |



|         |       |       |       |          |       |       |          |
|---------|-------|-------|-------|----------|-------|-------|----------|
| Ano10   | 3264  | 1.41  | 0.50  | 2.7E-09  | 1.47  | 0.56  | 2.2E-11  |
| Ano4    | 413   | -1.56 | -0.64 | 8.1E-03  | -1.41 | -0.50 | 4.5E-02  |
| Ano8    | 6678  | -1.61 | -0.69 | 4.3E-05  | -1.73 | -0.79 | 2.4E-06  |
| Anp32b  | 15767 | -1.75 | -0.81 | 2.0E-06  | -2.04 | -1.03 | 9.7E-10  |
| Antkmt  | 1730  | 1.65  | 0.72  | 6.9E-05  | 1.43  | 0.52  | 5.3E-03  |
| Antxr1  | 3034  | -2.63 | -1.39 | 1.6E-11  | -2.62 | -1.39 | 1.8E-11  |
| Antxr2  | 1034  | -1.92 | -0.94 | 7.5E-09  | -1.96 | -0.97 | 2.0E-09  |
| Anxa1   | 480   | -4.00 | -2.00 | 4.4E-05  | -3.16 | -1.66 | 8.3E-04  |
| Aoc2    | 1338  | 1.90  | 0.93  | 2.2E-15  | 1.92  | 0.94  | 1.0E-15  |
| Ap1ar   | 7400  | 1.31  | 0.39  | 1.1E-11  | 1.25  | 0.32  | 3.9E-08  |
| Ap1m1   | 7303  | -1.57 | -0.65 | 1.4E-24  | -1.66 | -0.73 | 8.4E-31  |
| Ap1s2   | 5451  | 1.35  | 0.43  | 1.5E-03  | 1.33  | 0.41  | 2.7E-03  |
| Ap1s3   | 359   | 3.17  | 1.66  | 4.5E-11  | 2.97  | 1.57  | 5.8E-10  |
| Ap2a1   | 9022  | 1.36  | 0.45  | 6.8E-04  | 1.29  | 0.37  | 6.2E-03  |
| Ap2a2   | 15202 | 1.38  | 0.46  | 3.0E-18  | 1.32  | 0.40  | 3.8E-14  |
| Ap3d1   | 14765 | 1.28  | 0.36  | 1.4E-08  | 1.24  | 0.31  | 1.2E-06  |
| Ap3m1   | 10524 | 1.32  | 0.40  | 1.2E-04  | 1.37  | 0.46  | 1.1E-05  |
| Ap3m2   | 4202  | 1.37  | 0.45  | 1.4E-05  | 1.45  | 0.54  | 1.7E-07  |
| Ap3s1   | 7782  | 1.36  | 0.45  | 2.4E-07  | 1.38  | 0.46  | 9.3E-08  |
| Ap4m1   | 4211  | -2.05 | -1.03 | 3.1E-83  | -2.15 | -1.10 | 5.6E-94  |
| Ap4s1   | 970   | -1.99 | -0.99 | 4.5E-21  | -2.05 | -1.03 | 8.7E-23  |
| Ap5s1   | 904   | 1.45  | 0.53  | 1.1E-11  | 1.40  | 0.49  | 5.6E-10  |
| Apaf1   | 8393  | 1.69  | 0.76  | 1.3E-37  | 1.77  | 0.82  | 4.7E-44  |
| Apba2   | 6951  | -1.57 | -0.65 | 2.4E-04  | -1.59 | -0.67 | 1.3E-04  |
| Apbb1ip | 142   | -1.73 | -0.79 | 1.1E-04  | -1.57 | -0.65 | 1.7E-03  |
| Apc2    | 25582 | -1.41 | -0.49 | 3.9E-02  | -1.48 | -0.57 | 1.7E-02  |
| Apeh    | 4262  | 1.48  | 0.57  | 1.9E-09  | 1.46  | 0.55  | 7.3E-09  |
| Apex2   | 1280  | -1.55 | -0.63 | 5.1E-15  | -1.55 | -0.63 | 6.2E-15  |
| Aph1a   | 4926  | 1.43  | 0.52  | 2.2E-08  | 1.31  | 0.39  | 2.6E-05  |
| Aph1b   | 4461  | 1.42  | 0.50  | 2.7E-06  | 1.44  | 0.53  | 1.0E-06  |
| Aph1c   | 811   | 5.81  | 2.54  | 8.3E-124 | 6.10  | 2.61  | 9.0E-130 |
| Api5    | 17264 | 1.38  | 0.47  | 5.7E-06  | 1.35  | 0.43  | 3.3E-05  |
| Ap1f    | 1775  | 2.52  | 1.33  | 1.2E-96  | 2.52  | 1.33  | 6.5E-96  |
| Ap1nr   | 1799  | -2.28 | -1.19 | 1.5E-24  | -2.46 | -1.30 | 7.7E-29  |
| Ap1p2   | 22093 | 1.67  | 0.74  | 3.3E-41  | 1.73  | 0.79  | 2.3E-46  |
| Apmap   | 2812  | 1.50  | 0.58  | 8.0E-20  | 1.44  | 0.53  | 2.1E-16  |
| Apobec3 | 247   | -1.83 | -0.88 | 1.5E-13  | -1.73 | -0.79 | 4.6E-11  |
| Apold1  | 534   | 1.52  | 0.60  | 3.0E-07  | 1.52  | 0.61  | 2.3E-07  |
| Apoo    | 2242  | 1.27  | 0.34  | 5.5E-04  | 1.33  | 0.41  | 3.5E-05  |
| Appl2   | 4832  | 1.21  | 0.28  | 2.7E-07  | 1.27  | 0.35  | 6.3E-11  |
| Aptx    | 2949  | -1.28 | -0.36 | 2.4E-05  | -1.33 | -0.42 | 9.1E-07  |
| Aqp1    | 1564  | -1.90 | -0.93 | 3.5E-02  | -2.05 | -1.04 | 1.8E-02  |
| Aqp11   | 570   | 2.21  | 1.15  | 2.4E-22  | 2.13  | 1.09  | 2.5E-20  |
| Araf    | 8449  | -1.33 | -0.41 | 2.4E-08  | -1.30 | -0.38 | 2.5E-07  |
| Arap2   | 360   | -1.70 | -0.77 | 3.4E-04  | -1.44 | -0.52 | 1.8E-02  |
| Arap3   | 1599  | -1.61 | -0.69 | 2.3E-06  | -1.76 | -0.82 | 1.6E-08  |
| Arc     | 170   | 1.64  | 0.72  | 1.7E-04  | 1.66  | 0.73  | 1.4E-04  |

|           |       |       |       |         |       |       |         |
|-----------|-------|-------|-------|---------|-------|-------|---------|
| Arf2      | 10786 | 1.55  | 0.63  | 4.6E-19 | 1.53  | 0.62  | 4.2E-18 |
| Arf3      | 12109 | 1.27  | 0.35  | 5.6E-06 | 1.20  | 0.26  | 9.6E-04 |
| Arfgap2   | 5954  | -1.56 | -0.64 | 1.2E-19 | -1.67 | -0.74 | 6.8E-26 |
| Arfgap3   | 2660  | 1.43  | 0.52  | 1.8E-25 | 1.34  | 0.42  | 7.3E-17 |
| Arfgef2   | 3514  | 1.70  | 0.77  | 3.0E-19 | 1.78  | 0.83  | 4.9E-22 |
| Arfip2    | 6408  | 1.42  | 0.50  | 9.9E-25 | 1.41  | 0.49  | 7.9E-24 |
| Arfrp1    | 3761  | -1.27 | -0.34 | 1.5E-05 | -1.32 | -0.40 | 4.0E-07 |
| Arglu1    | 25853 | -1.21 | -0.28 | 2.3E-02 | -1.25 | -0.32 | 7.1E-03 |
| Arhgap18  | 2849  | 1.30  | 0.38  | 1.8E-06 | 1.33  | 0.41  | 2.4E-07 |
| Arhgap20  | 2673  | 1.66  | 0.73  | 3.4E-08 | 1.71  | 0.77  | 4.9E-09 |
| Arhgap21  | 15502 | -1.42 | -0.51 | 1.1E-04 | -1.31 | -0.39 | 3.3E-03 |
| Arhgap22  | 170   | 2.12  | 1.08  | 1.6E-04 | 2.69  | 1.43  | 5.8E-07 |
| Arhgap23  | 3685  | 1.44  | 0.53  | 2.1E-05 | 1.41  | 0.50  | 6.4E-05 |
| Arhgap24  | 398   | -1.80 | -0.85 | 4.3E-04 | -1.67 | -0.74 | 2.4E-03 |
| Arhgap26  | 817   | 1.81  | 0.85  | 2.4E-08 | 1.85  | 0.89  | 7.1E-09 |
| Arhgap27  | 432   | -1.52 | -0.61 | 1.9E-05 | -1.63 | -0.71 | 5.5E-07 |
| Arhgap30  | 138   | -2.88 | -1.53 | 1.6E-17 | -2.93 | -1.55 | 4.6E-18 |
| Arhgap31  | 2522  | -1.75 | -0.81 | 9.8E-08 | -1.75 | -0.81 | 9.7E-08 |
| Arhgap35  | 20557 | -1.31 | -0.39 | 3.6E-04 | -1.27 | -0.34 | 2.0E-03 |
| Arhgap39  | 4939  | 1.51  | 0.59  | 7.1E-11 | 1.51  | 0.60  | 5.2E-11 |
| Arhgap4   | 571   | 1.65  | 0.73  | 1.5E-12 | 1.81  | 0.85  | 7.0E-17 |
| Arhgap42  | 1837  | -3.86 | -1.95 | 6.0E-65 | -3.41 | -1.77 | 9.9E-54 |
| Arhgap6   | 177   | -1.78 | -0.83 | 3.5E-04 | -1.61 | -0.69 | 3.5E-03 |
| Arhgdig   | 193   | -1.88 | -0.91 | 3.1E-02 | -2.05 | -1.03 | 1.4E-02 |
| Arhgef10l | 2812  | -1.57 | -0.65 | 2.7E-08 | -1.69 | -0.76 | 8.7E-11 |
| Arhgef11  | 7475  | 1.47  | 0.56  | 9.8E-08 | 1.48  | 0.56  | 8.2E-08 |
| Arhgef15  | 851   | -2.42 | -1.27 | 4.5E-24 | -2.73 | -1.45 | 1.3E-30 |
| Arhgef18  | 4572  | 1.46  | 0.54  | 2.6E-16 | 1.43  | 0.52  | 8.1E-15 |
| Arhgef2   | 9820  | -1.95 | -0.96 | 1.2E-15 | -2.08 | -1.06 | 9.6E-19 |
| Arhgef28  | 730   | -1.73 | -0.79 | 9.6E-06 | -1.50 | -0.58 | 1.3E-03 |
| Arhgef39  | 947   | -1.82 | -0.86 | 1.7E-06 | -2.04 | -1.03 | 9.7E-09 |
| Arhgef5   | 758   | -3.56 | -1.83 | 1.8E-14 | -3.47 | -1.79 | 6.8E-14 |
| Arhgef7   | 12176 | -1.30 | -0.38 | 7.5E-08 | -1.35 | -0.43 | 6.8E-10 |
| Arid1a    | 20363 | -1.49 | -0.58 | 4.8E-04 | -1.58 | -0.66 | 5.9E-05 |
| Arid1b    | 5659  | -2.13 | -1.09 | 1.2E-16 | -2.17 | -1.12 | 2.7E-17 |
| Arid2     | 11217 | -1.62 | -0.70 | 2.8E-15 | -1.59 | -0.67 | 4.7E-14 |
| Arid3b    | 1991  | 1.71  | 0.78  | 9.3E-07 | 1.47  | 0.56  | 6.1E-04 |
| Arid4a    | 3784  | 1.23  | 0.30  | 2.1E-06 | 1.28  | 0.35  | 2.5E-08 |
| Arid5a    | 365   | 2.65  | 1.41  | 2.9E-14 | 2.94  | 1.56  | 3.9E-17 |
| Arid5b    | 4505  | 1.59  | 0.67  | 8.1E-13 | 1.81  | 0.86  | 2.5E-20 |
| Arih2     | 5232  | 1.35  | 0.44  | 9.7E-15 | 1.31  | 0.39  | 4.1E-12 |
| Arl10     | 1376  | -1.26 | -0.33 | 9.8E-03 | -1.26 | -0.33 | 1.1E-02 |
| Arl13b    | 3545  | 2.03  | 1.02  | 1.9E-43 | 2.15  | 1.11  | 1.4E-50 |
| Arl15     | 3996  | 1.26  | 0.34  | 1.0E-03 | 1.29  | 0.36  | 3.9E-04 |
| Arl16     | 1235  | 1.49  | 0.58  | 2.2E-15 | 1.44  | 0.53  | 3.6E-13 |
| Arl2      | 1908  | -1.61 | -0.68 | 1.2E-30 | -1.65 | -0.72 | 5.3E-34 |
| Arl3      | 5824  | 1.55  | 0.63  | 2.0E-12 | 1.43  | 0.52  | 1.1E-08 |

|         |       |       |       |         |       |       |         |
|---------|-------|-------|-------|---------|-------|-------|---------|
| Arl4a   | 5987  | 1.26  | 0.33  | 9.3E-04 | 1.25  | 0.32  | 1.7E-03 |
| Arl5c   | 218   | 4.28  | 2.10  | 3.2E-49 | 4.10  | 2.04  | 2.1E-45 |
| Arl6    | 2653  | 1.84  | 0.88  | 9.4E-21 | 1.90  | 0.93  | 1.1E-22 |
| Arl6ip1 | 26887 | 1.42  | 0.50  | 5.7E-09 | 1.39  | 0.47  | 5.9E-08 |
| Arl6ip5 | 4917  | 1.36  | 0.45  | 4.7E-11 | 1.42  | 0.51  | 7.1E-14 |
| Arl6ip6 | 5014  | 1.65  | 0.72  | 2.9E-08 | 1.48  | 0.57  | 1.6E-05 |
| Arl8b   | 8363  | 1.30  | 0.37  | 7.1E-11 | 1.27  | 0.34  | 2.8E-09 |
| Armc1   | 6660  | 1.30  | 0.38  | 6.7E-07 | 1.28  | 0.36  | 2.1E-06 |
| Armc2   | 481   | 1.50  | 0.58  | 1.8E-03 | 1.59  | 0.67  | 2.8E-04 |
| Armc5   | 927   | -1.88 | -0.91 | 1.1E-13 | -1.91 | -0.93 | 3.2E-14 |
| Armc6   | 1666  | -1.47 | -0.56 | 8.8E-06 | -1.43 | -0.51 | 5.0E-05 |
| Armc7   | 682   | 1.34  | 0.42  | 2.8E-04 | 1.30  | 0.37  | 1.3E-03 |
| Armc9   | 3088  | 2.29  | 1.20  | 9.0E-84 | 2.26  | 1.18  | 3.9E-81 |
| Armcx1  | 4223  | -2.14 | -1.10 | 3.3E-52 | -2.12 | -1.08 | 1.4E-50 |
| Armcx3  | 4569  | 1.46  | 0.54  | 1.2E-17 | 1.47  | 0.55  | 3.9E-18 |
| Armh3   | 1724  | -1.56 | -0.64 | 1.9E-25 | -1.69 | -0.76 | 4.2E-35 |
| Armh4   | 3827  | 1.38  | 0.47  | 1.9E-02 | 1.54  | 0.62  | 1.3E-03 |
| Arnt2   | 18880 | -1.34 | -0.42 | 5.6E-03 | -1.41 | -0.50 | 1.1E-03 |
| Arntl   | 1203  | 2.17  | 1.12  | 8.8E-45 | 2.07  | 1.05  | 1.6E-39 |
| Arntl2  | 511   | 1.71  | 0.78  | 3.1E-06 | 2.17  | 1.12  | 1.2E-11 |
| Arpc2   | 12830 | 1.25  | 0.32  | 8.6E-12 | 1.24  | 0.31  | 3.9E-11 |
| Arpc5l  | 4951  | 1.37  | 0.46  | 8.4E-14 | 1.29  | 0.36  | 4.6E-09 |
| Arpin   | 1002  | -1.62 | -0.70 | 6.5E-09 | -1.76 | -0.82 | 8.3E-12 |
| Arpp19  | 15783 | 1.31  | 0.39  | 3.8E-09 | 1.33  | 0.41  | 5.4E-10 |
| Arpp21  | 589   | -3.31 | -1.73 | 2.8E-06 | -2.75 | -1.46 | 9.2E-05 |
| Arrib1  | 7323  | -1.38 | -0.47 | 2.7E-03 | -1.33 | -0.42 | 8.5E-03 |
| Arrib2  | 3883  | 1.37  | 0.45  | 8.6E-06 | 1.29  | 0.37  | 3.4E-04 |
| Arirdc1 | 1143  | 2.55  | 1.35  | 1.7E-38 | 2.40  | 1.26  | 6.2E-34 |
| Arirdc3 | 6108  | -1.47 | -0.56 | 6.9E-06 | -1.37 | -0.45 | 3.6E-04 |
| Arsb    | 1585  | -1.66 | -0.74 | 4.0E-12 | -1.68 | -0.75 | 1.3E-12 |
| Arsi    | 441   | -2.46 | -1.30 | 2.2E-05 | -2.61 | -1.38 | 6.1E-06 |
| Arsk    | 783   | -1.26 | -0.33 | 1.1E-03 | -1.18 | -0.24 | 2.2E-02 |
| As3mt   | 858   | -1.86 | -0.90 | 1.1E-27 | -1.68 | -0.75 | 1.7E-19 |
| Asah1   | 7276  | 1.75  | 0.80  | 3.8E-18 | 1.76  | 0.82  | 9.3E-19 |
| Asah2   | 331   | -2.27 | -1.18 | 1.2E-06 | -2.09 | -1.06 | 1.6E-05 |
| Asap3   | 1872  | 1.98  | 0.98  | 5.5E-12 | 2.03  | 1.02  | 7.9E-13 |
| Asb1    | 3892  | 1.55  | 0.64  | 9.9E-16 | 1.61  | 0.69  | 3.7E-18 |
| Asb13   | 1451  | -1.37 | -0.45 | 1.9E-05 | -1.53 | -0.62 | 2.8E-09 |
| Asb3    | 1497  | -1.48 | -0.57 | 7.9E-10 | -1.42 | -0.50 | 6.2E-08 |
| Asb6    | 1892  | 1.27  | 0.35  | 1.4E-04 | 1.16  | 0.22  | 2.2E-02 |
| Asb7    | 2931  | 1.43  | 0.52  | 3.3E-10 | 1.38  | 0.47  | 2.1E-08 |
| Ascc1   | 1461  | -1.30 | -0.38 | 4.4E-12 | -1.33 | -0.41 | 1.1E-13 |
| Asf1b   | 2507  | 2.77  | 1.47  | 2.3E-13 | 2.31  | 1.21  | 2.6E-09 |
| Ash1l   | 9264  | -1.69 | -0.75 | 1.4E-05 | -1.40 | -0.48 | 6.9E-03 |
| Ash2l   | 7989  | -1.37 | -0.46 | 7.0E-14 | -1.46 | -0.55 | 2.3E-19 |
| Asl     | 1544  | 2.09  | 1.06  | 7.5E-42 | 1.93  | 0.95  | 1.2E-33 |
| Asns    | 2610  | 1.56  | 0.65  | 3.7E-09 | 1.57  | 0.65  | 2.4E-09 |

|          |       |       |       |         |       |       |         |
|----------|-------|-------|-------|---------|-------|-------|---------|
| Asphd2   | 3058  | 1.61  | 0.68  | 4.7E-12 | 1.67  | 0.74  | 8.4E-14 |
| Aspn     | 763   | -7.74 | -2.95 | 2.8E-05 | -7.45 | -2.90 | 4.1E-05 |
| Aspscr1  | 3308  | -1.36 | -0.45 | 2.3E-13 | -1.43 | -0.51 | 1.8E-17 |
| Asrgl1   | 3173  | 1.79  | 0.84  | 8.6E-24 | 1.77  | 0.82  | 8.8E-23 |
| Aste1    | 987   | 1.35  | 0.44  | 8.0E-06 | 1.48  | 0.57  | 4.6E-09 |
| Astn1    | 10065 | -1.39 | -0.48 | 6.5E-03 | -1.34 | -0.43 | 1.7E-02 |
| Asxl1    | 9564  | -1.39 | -0.48 | 7.4E-06 | -1.42 | -0.51 | 1.8E-06 |
| Asxl3    | 5208  | -1.75 | -0.81 | 1.5E-10 | -1.57 | -0.65 | 2.7E-07 |
| Atad2b   | 7614  | -1.87 | -0.91 | 6.3E-25 | -1.78 | -0.83 | 5.1E-21 |
| Atad3a   | 4669  | 1.36  | 0.45  | 1.1E-06 | 1.28  | 0.36  | 1.2E-04 |
| Atad5    | 6034  | 1.31  | 0.39  | 9.0E-03 | 1.39  | 0.48  | 1.0E-03 |
| Atf1     | 1643  | -2.42 | -1.28 | 6.1E-20 | -2.75 | -1.46 | 9.4E-26 |
| Atf3     | 165   | 2.93  | 1.55  | 1.4E-10 | 2.24  | 1.16  | 2.3E-06 |
| Atf4     | 7357  | -1.27 | -0.34 | 6.0E-06 | -1.37 | -0.45 | 1.2E-09 |
| Atf5     | 2343  | -1.41 | -0.50 | 1.6E-02 | -1.69 | -0.75 | 1.6E-04 |
| Atf6     | 4850  | 1.97  | 0.98  | 4.7E-32 | 2.09  | 1.06  | 1.8E-37 |
| Atf7ip   | 13847 | -1.60 | -0.68 | 2.0E-13 | -1.56 | -0.64 | 4.3E-12 |
| Atf7ip2  | 124   | 1.89  | 0.91  | 1.2E-02 | 1.71  | 0.77  | 3.7E-02 |
| Atg10    | 362   | -1.59 | -0.67 | 1.1E-10 | -1.63 | -0.71 | 7.8E-12 |
| Atg101   | 1809  | 1.46  | 0.54  | 1.2E-07 | 1.38  | 0.47  | 5.8E-06 |
| Atg12    | 8267  | 1.53  | 0.61  | 4.6E-15 | 1.60  | 0.68  | 2.5E-18 |
| Atg13    | 4511  | 1.36  | 0.45  | 1.5E-17 | 1.35  | 0.44  | 8.9E-17 |
| Atg16l2  | 961   | 1.84  | 0.88  | 3.2E-27 | 1.70  | 0.76  | 7.5E-21 |
| Atg2b    | 5427  | 1.30  | 0.38  | 4.4E-04 | 1.44  | 0.52  | 9.4E-07 |
| Atg4b    | 7841  | 1.39  | 0.47  | 4.0E-21 | 1.42  | 0.51  | 2.4E-24 |
| Atg4d    | 2225  | 1.45  | 0.54  | 6.9E-10 | 1.31  | 0.39  | 1.2E-05 |
| Atg5     | 2643  | 1.25  | 0.32  | 8.8E-04 | 1.32  | 0.41  | 2.2E-05 |
| Atl1     | 2686  | -2.63 | -1.39 | 2.5E-14 | -2.61 | -1.39 | 3.4E-14 |
| Atl3     | 4777  | -1.75 | -0.81 | 2.3E-12 | -1.60 | -0.68 | 6.1E-09 |
| Atmin    | 4631  | 1.44  | 0.52  | 2.0E-23 | 1.44  | 0.52  | 2.9E-23 |
| Atn1     | 628   | -1.57 | -0.65 | 4.7E-02 | -1.78 | -0.83 | 9.9E-03 |
| Atoh8    | 272   | -1.46 | -0.54 | 9.1E-03 | -1.34 | -0.43 | 4.6E-02 |
| Atox1    | 1991  | 1.44  | 0.53  | 2.4E-08 | 1.41  | 0.50  | 1.5E-07 |
| Atp10a   | 473   | -1.89 | -0.92 | 3.3E-16 | -1.89 | -0.92 | 4.2E-16 |
| Atp10b   | 100   | -4.83 | -2.27 | 2.0E-04 | -3.02 | -1.59 | 1.2E-02 |
| Atp13a2  | 8534  | 1.45  | 0.54  | 7.3E-05 | 1.41  | 0.49  | 3.4E-04 |
| Atp13a3  | 9720  | 1.67  | 0.74  | 7.0E-22 | 1.72  | 0.78  | 1.0E-24 |
| Atp1a2   | 4737  | -1.68 | -0.75 | 6.9E-03 | -1.63 | -0.71 | 1.1E-02 |
| Atp1b2   | 3050  | 1.81  | 0.86  | 3.5E-08 | 1.69  | 0.75  | 1.6E-06 |
| Atp1b3   | 9061  | 1.32  | 0.40  | 8.7E-17 | 1.26  | 0.33  | 1.2E-11 |
| Atp23    | 769   | 2.30  | 1.20  | 4.7E-33 | 2.29  | 1.20  | 9.9E-33 |
| Atp2b4   | 8446  | 1.45  | 0.54  | 3.0E-05 | 1.60  | 0.68  | 1.2E-07 |
| Atp4a    | 133   | 3.99  | 2.00  | 7.4E-52 | 3.56  | 1.83  | 6.5E-42 |
| Atp6ap2  | 6746  | 1.43  | 0.52  | 3.2E-13 | 1.50  | 0.59  | 1.2E-16 |
| Atp6v0a2 | 6136  | 1.42  | 0.51  | 2.4E-14 | 1.40  | 0.49  | 2.6E-13 |
| Atp6v0b  | 6380  | 1.68  | 0.74  | 1.2E-20 | 1.70  | 0.77  | 5.7E-22 |
| Atp6v0d1 | 7619  | 1.29  | 0.37  | 2.4E-07 | 1.23  | 0.30  | 2.6E-05 |

|               |       |       |       |         |       |       |         |
|---------------|-------|-------|-------|---------|-------|-------|---------|
| Atp6v0e       | 2228  | 1.22  | 0.28  | 4.1E-04 | 1.28  | 0.36  | 5.5E-06 |
| Atp6v1a       | 14716 | 1.74  | 0.80  | 1.7E-37 | 1.81  | 0.85  | 5.8E-43 |
| Atp6v1d       | 6816  | 1.42  | 0.51  | 2.8E-16 | 1.46  | 0.55  | 4.4E-19 |
| Atp6v1e1      | 7661  | 1.21  | 0.28  | 2.6E-05 | 1.26  | 0.33  | 3.0E-07 |
| Atp6v1h       | 8350  | 1.23  | 0.30  | 2.2E-03 | 1.30  | 0.38  | 6.6E-05 |
| Atp7b         | 677   | 1.90  | 0.93  | 7.2E-24 | 1.81  | 0.86  | 2.5E-20 |
| Atp8a1        | 9431  | 1.84  | 0.88  | 1.1E-10 | 2.00  | 1.00  | 1.5E-13 |
| Atp8b2        | 6504  | 1.44  | 0.52  | 6.7E-12 | 1.42  | 0.51  | 3.6E-11 |
| Atp8b3        | 122   | 1.34  | 0.43  | 1.3E-02 | 1.29  | 0.37  | 3.5E-02 |
| Atpaf1        | 881   | -1.49 | -0.58 | 6.9E-13 | -1.56 | -0.64 | 8.5E-16 |
| Atpsckmt      | 1169  | -1.80 | -0.85 | 9.0E-08 | -1.68 | -0.75 | 3.2E-06 |
| Atrx          | 29927 | -1.80 | -0.85 | 2.5E-06 | -1.44 | -0.52 | 5.0E-03 |
| Atxn3         | 3712  | 1.22  | 0.29  | 3.1E-04 | 1.26  | 0.33  | 2.9E-05 |
| Atxn7         | 2642  | -1.81 | -0.85 | 1.8E-14 | -1.85 | -0.89 | 1.6E-15 |
| Atxn7l2       | 2048  | -2.73 | -1.45 | 6.1E-23 | -2.93 | -1.55 | 5.1E-26 |
| AU021092      | 225   | -1.57 | -0.65 | 2.8E-04 | -1.54 | -0.62 | 5.7E-04 |
| AU022252      | 8011  | 1.90  | 0.93  | 6.5E-31 | 1.92  | 0.94  | 2.0E-31 |
| AU041133      | 486   | -1.91 | -0.93 | 1.1E-07 | -1.58 | -0.66 | 2.5E-04 |
| Auh           | 1414  | -1.25 | -0.32 | 1.5E-07 | -1.28 | -0.36 | 5.7E-09 |
| Aven          | 440   | -3.43 | -1.78 | 2.0E-36 | -3.41 | -1.77 | 7.0E-36 |
| Avpi1         | 314   | 2.04  | 1.03  | 4.3E-08 | 1.78  | 0.83  | 1.2E-05 |
| AW209491      | 1182  | -1.26 | -0.33 | 6.3E-06 | -1.23 | -0.30 | 4.6E-05 |
| Azin1         | 23358 | 1.33  | 0.41  | 2.7E-08 | 1.34  | 0.43  | 7.6E-09 |
| Azin2         | 1208  | 2.86  | 1.52  | 6.9E-31 | 3.06  | 1.61  | 9.4E-35 |
| B230219D22Rik | 12291 | -1.27 | -0.35 | 9.5E-07 | -1.28 | -0.35 | 8.5E-07 |
| B3galnt2      | 4658  | 1.44  | 0.52  | 7.5E-10 | 1.38  | 0.46  | 6.5E-08 |
| B3galt2       | 876   | -1.75 | -0.81 | 3.1E-03 | -1.50 | -0.59 | 3.7E-02 |
| B3galt4       | 182   | -2.31 | -1.21 | 7.3E-14 | -2.33 | -1.22 | 4.2E-14 |
| B3galt6       | 813   | -1.37 | -0.46 | 1.6E-09 | -1.42 | -0.51 | 1.3E-11 |
| B3gat3        | 4425  | 1.25  | 0.32  | 8.4E-05 | 1.24  | 0.31  | 1.1E-04 |
| B3glct        | 3008  | -1.29 | -0.37 | 5.0E-04 | -1.29 | -0.37 | 4.3E-04 |
| B3gnt4        | 109   | 1.43  | 0.51  | 4.0E-04 | 1.26  | 0.34  | 2.4E-02 |
| B3gnt5        | 6584  | -1.38 | -0.47 | 2.3E-06 | -1.34 | -0.42 | 3.1E-05 |
| B3gnt7        | 252   | 1.47  | 0.56  | 1.3E-02 | 1.47  | 0.56  | 1.3E-02 |
| B3gnt9        | 319   | -2.48 | -1.31 | 7.4E-09 | -2.60 | -1.38 | 1.2E-09 |
| B4galnt4      | 4625  | -1.58 | -0.66 | 1.9E-13 | -1.64 | -0.71 | 1.1E-15 |
| B4galt2       | 4167  | -1.53 | -0.62 | 5.9E-13 | -1.57 | -0.65 | 1.9E-14 |
| B4galt5       | 3724  | 1.57  | 0.65  | 8.0E-10 | 1.44  | 0.53  | 7.8E-07 |
| B4galt6       | 4780  | 1.33  | 0.41  | 8.6E-05 | 1.34  | 0.43  | 4.5E-05 |
| B9d1          | 779   | -1.49 | -0.57 | 9.2E-08 | -1.51 | -0.59 | 2.9E-08 |
| B9d2          | 594   | -1.66 | -0.73 | 4.5E-13 | -1.59 | -0.67 | 2.3E-11 |
| Bace1         | 6271  | 1.83  | 0.88  | 4.3E-22 | 1.90  | 0.92  | 2.0E-24 |
| Bag4          | 4451  | 1.43  | 0.52  | 3.5E-13 | 1.44  | 0.52  | 1.9E-13 |
| Bahd1         | 5131  | 2.45  | 1.29  | 2.3E-18 | 2.18  | 1.12  | 4.6E-14 |
| Baiap2        | 1884  | 2.79  | 1.48  | 6.0E-73 | 2.98  | 1.57  | 2.4E-82 |
| Baiap2l1      | 386   | 3.78  | 1.92  | 2.5E-09 | 3.63  | 1.86  | 8.1E-09 |
| Baiap2l2      | 100   | 2.75  | 1.46  | 2.4E-10 | 2.11  | 1.08  | 3.7E-06 |

|          |       |       |       |         |       |       |         |
|----------|-------|-------|-------|---------|-------|-------|---------|
| Baiap3   | 573   | 2.07  | 1.05  | 2.5E-08 | 2.04  | 1.03  | 5.1E-08 |
| Bak1     | 1703  | -1.74 | -0.80 | 8.9E-08 | -1.87 | -0.91 | 1.0E-09 |
| Banf1    | 4611  | -1.32 | -0.40 | 3.1E-03 | -1.50 | -0.58 | 9.9E-06 |
| Barhl1   | 964   | -1.66 | -0.73 | 2.1E-02 | -1.95 | -0.97 | 1.8E-03 |
| Basp1    | 35657 | -1.40 | -0.48 | 1.5E-03 | -1.46 | -0.55 | 3.2E-04 |
| Bax      | 1829  | 1.37  | 0.45  | 1.8E-04 | 1.24  | 0.32  | 1.1E-02 |
| Baz2a    | 13887 | 1.76  | 0.82  | 1.2E-12 | 1.77  | 0.82  | 8.3E-13 |
| Baz2b    | 10640 | -1.60 | -0.68 | 9.1E-08 | -1.41 | -0.50 | 1.2E-04 |
| Bbc3     | 762   | 2.22  | 1.15  | 5.6E-19 | 2.14  | 1.10  | 1.9E-17 |
| Bbip1    | 3597  | -1.29 | -0.37 | 6.9E-06 | -1.25 | -0.32 | 1.4E-04 |
| Bbln     | 846   | 1.71  | 0.77  | 2.6E-23 | 1.56  | 0.64  | 1.8E-16 |
| Bbof1    | 478   | 1.38  | 0.46  | 2.1E-02 | 1.61  | 0.68  | 4.8E-04 |
| Bbs1     | 2679  | -1.27 | -0.35 | 1.6E-05 | -1.31 | -0.39 | 9.6E-07 |
| Bbs10    | 554   | -1.25 | -0.32 | 1.5E-02 | -1.39 | -0.48 | 2.6E-04 |
| Bbs2     | 2236  | -1.32 | -0.41 | 3.9E-14 | -1.25 | -0.32 | 2.1E-09 |
| Bbs5     | 984   | 1.21  | 0.27  | 9.4E-05 | 1.28  | 0.35  | 3.7E-07 |
| Bbx      | 4976  | 1.48  | 0.56  | 2.4E-09 | 1.74  | 0.80  | 9.1E-18 |
| BC024063 | 540   | -1.50 | -0.59 | 2.7E-06 | -1.21 | -0.27 | 4.1E-02 |
| BC024139 | 1571  | -1.85 | -0.89 | 3.0E-05 | -1.46 | -0.55 | 1.3E-02 |
| BC024978 | 706   | -2.49 | -1.32 | 1.0E-17 | -2.68 | -1.42 | 2.2E-20 |
| BC025920 | 665   | -1.66 | -0.73 | 3.2E-11 | -1.69 | -0.75 | 7.9E-12 |
| BC028528 | 213   | -1.84 | -0.88 | 1.5E-08 | -1.82 | -0.86 | 3.7E-08 |
| BC029722 | 645   | -1.33 | -0.41 | 3.5E-10 | -1.26 | -0.34 | 2.8E-07 |
| BC034090 | 663   | -3.26 | -1.71 | 1.6E-48 | -2.98 | -1.57 | 3.0E-41 |
| BC035947 | 114   | -2.57 | -1.36 | 1.3E-07 | -3.09 | -1.63 | 3.3E-10 |
| Bcap31   | 3970  | 1.34  | 0.42  | 3.5E-07 | 1.28  | 0.36  | 1.4E-05 |
| Bcar1    | 5039  | 1.29  | 0.36  | 2.5E-03 | 1.24  | 0.31  | 1.0E-02 |
| Bcas1    | 279   | -1.78 | -0.83 | 1.5E-03 | -1.52 | -0.60 | 2.4E-02 |
| Bcas2    | 6556  | -1.19 | -0.25 | 3.2E-03 | -1.27 | -0.35 | 2.4E-05 |
| Bcat1    | 5539  | -1.32 | -0.40 | 1.3E-04 | -1.37 | -0.46 | 1.0E-05 |
| Bcat2    | 1499  | -1.61 | -0.69 | 1.5E-10 | -1.77 | -0.83 | 8.1E-15 |
| Bcdin3d  | 987   | -1.23 | -0.30 | 4.4E-03 | -1.40 | -0.49 | 1.6E-06 |
| Bckdha   | 1962  | 1.26  | 0.34  | 1.7E-03 | 1.22  | 0.28  | 1.1E-02 |
| Bckdhb   | 1363  | 1.32  | 0.40  | 8.1E-05 | 1.26  | 0.33  | 1.3E-03 |
| Bckdk    | 2521  | -1.23 | -0.29 | 4.6E-03 | -1.34 | -0.43 | 2.9E-05 |
| Bcl10    | 2338  | 1.68  | 0.75  | 2.6E-19 | 1.59  | 0.67  | 1.4E-15 |
| Bcl11a   | 10078 | -1.59 | -0.67 | 6.6E-05 | -1.70 | -0.76 | 5.2E-06 |
| Bcl11b   | 7112  | -1.58 | -0.66 | 1.7E-02 | -1.67 | -0.74 | 8.1E-03 |
| Bcl2     | 2372  | -1.32 | -0.40 | 3.9E-03 | -1.30 | -0.37 | 7.5E-03 |
| Bcl2l1   | 5311  | -1.76 | -0.81 | 3.0E-17 | -1.91 | -0.93 | 3.2E-22 |
| Bcl2l11  | 2437  | 1.34  | 0.43  | 5.0E-06 | 1.35  | 0.43  | 5.0E-06 |
| Bcl2l12  | 1325  | -1.43 | -0.52 | 1.8E-03 | -1.60 | -0.68 | 3.6E-05 |
| Bcl7a    | 8903  | -1.89 | -0.92 | 4.0E-08 | -1.95 | -0.97 | 6.2E-09 |
| Bcl7b    | 879   | -2.11 | -1.08 | 4.2E-18 | -2.32 | -1.22 | 8.9E-23 |
| Bcl9     | 11054 | -1.44 | -0.52 | 1.1E-04 | -1.52 | -0.60 | 7.8E-06 |
| Bcl9l    | 7001  | 1.33  | 0.41  | 5.5E-03 | 1.23  | 0.30  | 4.6E-02 |
| Bclaf1   | 28096 | -1.53 | -0.61 | 6.9E-13 | -1.44 | -0.53 | 7.4E-10 |



|         |      |       |       |         |       |       |          |
|---------|------|-------|-------|---------|-------|-------|----------|
| Bcor1   | 4918 | 1.89  | 0.92  | 1.9E-10 | 1.80  | 0.85  | 5.5E-09  |
| Bcr     | 9406 | 1.36  | 0.44  | 4.2E-03 | 1.35  | 0.43  | 5.0E-03  |
| Bdh1    | 2911 | -1.55 | -0.63 | 3.9E-06 | -1.60 | -0.68 | 7.1E-07  |
| Bdh2    | 169  | -1.82 | -0.87 | 6.5E-04 | -1.66 | -0.73 | 4.7E-03  |
| Bdkrb2  | 181  | 1.57  | 0.65  | 3.4E-02 | 1.82  | 0.86  | 4.9E-03  |
| Bdnf    | 423  | 2.57  | 1.36  | 9.7E-12 | 3.10  | 1.63  | 3.3E-16  |
| Bdp1    | 6087 | 1.23  | 0.30  | 5.0E-02 | 1.43  | 0.51  | 5.8E-04  |
| Bean1   | 143  | -3.65 | -1.87 | 3.4E-08 | -3.24 | -1.70 | 6.3E-07  |
| Bend3   | 1944 | -3.55 | -1.83 | 3.6E-26 | -4.02 | -2.01 | 2.3E-31  |
| Bend4   | 3105 | 1.68  | 0.75  | 2.7E-19 | 1.82  | 0.87  | 1.8E-25  |
| Bend5   | 1357 | -1.84 | -0.88 | 3.8E-18 | -1.83 | -0.87 | 8.0E-18  |
| Bex1    | 3571 | 1.43  | 0.52  | 7.1E-05 | 1.36  | 0.44  | 8.7E-04  |
| Bex4    | 3020 | 1.52  | 0.60  | 5.9E-07 | 1.40  | 0.48  | 7.7E-05  |
| Bgn     | 6732 | -1.47 | -0.55 | 1.5E-02 | -1.54 | -0.62 | 6.2E-03  |
| Bhlhe22 | 1614 | -2.33 | -1.22 | 9.0E-03 | -2.04 | -1.03 | 3.0E-02  |
| Bhlhe40 | 487  | -1.44 | -0.53 | 6.3E-05 | -1.45 | -0.53 | 5.8E-05  |
| Bhlhe41 | 341  | 1.95  | 0.96  | 1.2E-07 | 1.93  | 0.95  | 1.6E-07  |
| Bid     | 1333 | 2.75  | 1.46  | 5.9E-73 | 2.86  | 1.52  | 6.5E-78  |
| Bin1    | 5487 | -1.41 | -0.49 | 2.8E-05 | -1.34 | -0.42 | 3.7E-04  |
| Bin3    | 1758 | 1.54  | 0.62  | 6.1E-11 | 1.45  | 0.54  | 2.0E-08  |
| Birc3   | 260  | -3.35 | -1.74 | 7.0E-11 | -2.97 | -1.57 | 5.6E-09  |
| Bivm    | 2916 | -1.62 | -0.70 | 4.6E-26 | -1.55 | -0.63 | 9.0E-22  |
| Bloc1s6 | 3335 | -1.33 | -0.41 | 9.3E-10 | -1.41 | -0.50 | 1.2E-13  |
| Blvra   | 600  | -1.52 | -0.60 | 4.5E-12 | -1.41 | -0.50 | 1.6E-08  |
| Blvrb   | 723  | 2.00  | 1.00  | 4.8E-07 | 1.85  | 0.89  | 1.0E-05  |
| Bmerb1  | 3258 | -1.45 | -0.54 | 2.0E-02 | -1.39 | -0.48 | 4.1E-02  |
| Bmf     | 5588 | 2.71  | 1.44  | 2.6E-26 | 2.81  | 1.49  | 3.8E-28  |
| Bmi1    | 7346 | -2.08 | -1.05 | 4.9E-29 | -2.12 | -1.08 | 1.7E-30  |
| Bmp1    | 6263 | -1.80 | -0.85 | 1.8E-09 | -1.70 | -0.77 | 5.9E-08  |
| Bmp2    | 291  | -1.49 | -0.58 | 3.6E-02 | -1.68 | -0.74 | 6.3E-03  |
| Bmp2k   | 2466 | 1.55  | 0.63  | 2.6E-25 | 1.55  | 0.64  | 1.2E-25  |
| Bmp3    | 418  | -2.22 | -1.15 | 3.4E-05 | -2.17 | -1.12 | 6.5E-05  |
| Bmper   | 990  | -2.37 | -1.24 | 6.5E-10 | -2.22 | -1.15 | 1.2E-08  |
| Bmpr1b  | 1162 | -1.94 | -0.96 | 3.6E-14 | -1.71 | -0.77 | 1.3E-09  |
| Bmt2    | 4931 | 1.66  | 0.73  | 2.2E-25 | 1.64  | 0.71  | 3.6E-24  |
| Bnc2    | 799  | -3.32 | -1.73 | 1.3E-06 | -2.34 | -1.22 | 8.3E-04  |
| Bnip1   | 1686 | -1.49 | -0.57 | 1.3E-17 | -1.52 | -0.61 | 1.9E-19  |
| Bnip3   | 4078 | 1.79  | 0.84  | 4.4E-15 | 1.98  | 0.98  | 2.4E-20  |
| Boc     | 4150 | -1.69 | -0.76 | 1.4E-11 | -1.67 | -0.74 | 4.6E-11  |
| Bok     | 962  | -1.98 | -0.99 | 2.2E-13 | -2.06 | -1.05 | 7.1E-15  |
| Bola1   | 708  | -1.35 | -0.43 | 3.3E-03 | -1.41 | -0.50 | 6.7E-04  |
| Bola2   | 2477 | 1.59  | 0.67  | 2.6E-05 | 1.48  | 0.56  | 5.2E-04  |
| Bop1    | 4752 | 1.96  | 0.97  | 1.3E-24 | 1.84  | 0.88  | 2.8E-20  |
| Bora    | 3772 | 1.79  | 0.84  | 5.4E-08 | 1.66  | 0.73  | 2.9E-06  |
| Borcs5  | 959  | 1.32  | 0.40  | 1.3E-06 | 1.19  | 0.25  | 2.9E-03  |
| Borcs6  | 1007 | 2.28  | 1.19  | 1.5E-35 | 2.19  | 1.13  | 2.1E-32  |
| Borcs7  | 761  | -4.14 | -2.05 | 1.8E-95 | -4.37 | -2.13 | 1.7E-102 |

|               |       |       |       |         |       |       |          |
|---------------|-------|-------|-------|---------|-------|-------|----------|
| Bphl          | 856   | -1.27 | -0.34 | 1.5E-04 | -1.26 | -0.34 | 2.4E-04  |
| Bpnt1         | 1925  | 1.34  | 0.42  | 8.5E-11 | 1.31  | 0.39  | 2.7E-09  |
| Bpnt2         | 17949 | 1.31  | 0.39  | 2.7E-08 | 1.31  | 0.39  | 2.2E-08  |
| Bptf          | 13737 | -1.93 | -0.95 | 4.8E-18 | -1.73 | -0.79 | 6.8E-13  |
| Brap          | 4740  | 1.39  | 0.48  | 5.0E-16 | 1.33  | 0.41  | 7.2E-12  |
| Brat1         | 2214  | 1.34  | 0.42  | 1.1E-06 | 1.29  | 0.36  | 3.2E-05  |
| Brca1         | 5043  | 1.43  | 0.52  | 4.0E-03 | 1.48  | 0.56  | 1.7E-03  |
| Brd1          | 7073  | -1.39 | -0.48 | 1.9E-04 | -1.47 | -0.55 | 1.5E-05  |
| Brd2          | 19021 | -1.26 | -0.33 | 1.3E-04 | -1.35 | -0.43 | 6.2E-07  |
| Brd3          | 16321 | -1.22 | -0.29 | 3.1E-02 | -1.32 | -0.40 | 2.8E-03  |
| Brd8          | 12694 | -1.89 | -0.92 | 4.6E-39 | -1.87 | -0.91 | 8.6E-38  |
| Brd9          | 7341  | -1.79 | -0.84 | 4.6E-40 | -1.73 | -0.79 | 3.3E-35  |
| Brdt          | 662   | 2.46  | 1.30  | 1.3E-38 | 2.56  | 1.36  | 1.1E-41  |
| Brf1          | 5730  | 1.40  | 0.49  | 1.4E-07 | 1.33  | 0.42  | 1.0E-05  |
| Bri3bp        | 6156  | 1.63  | 0.70  | 5.2E-20 | 1.57  | 0.65  | 2.2E-17  |
| Brinp2        | 2925  | 2.82  | 1.49  | 2.7E-12 | 2.61  | 1.38  | 1.2E-10  |
| Brinp3        | 271   | -1.66 | -0.74 | 3.7E-02 | -1.74 | -0.80 | 2.4E-02  |
| Brpf1         | 5325  | 1.41  | 0.50  | 3.4E-07 | 1.31  | 0.39  | 9.2E-05  |
| Brpf3         | 2554  | -4.32 | -2.11 | 2.5E-97 | -4.82 | -2.27 | 7.1E-112 |
| Brsk1         | 6395  | -1.46 | -0.55 | 1.0E-02 | -1.45 | -0.54 | 1.3E-02  |
| Brsk2         | 7140  | -1.74 | -0.80 | 2.6E-04 | -1.86 | -0.89 | 4.1E-05  |
| Brwd1         | 13743 | -1.37 | -0.45 | 5.2E-06 | -1.29 | -0.37 | 2.3E-04  |
| Brwd3         | 6365  | 1.42  | 0.50  | 2.2E-03 | 1.66  | 0.73  | 4.9E-06  |
| Bsdc1         | 3880  | 1.42  | 0.50  | 2.2E-11 | 1.38  | 0.46  | 9.5E-10  |
| Btaf1         | 10163 | 1.41  | 0.49  | 1.9E-02 | 1.62  | 0.70  | 6.9E-04  |
| Btbd11        | 1822  | 1.72  | 0.79  | 3.2E-12 | 1.76  | 0.81  | 5.0E-13  |
| Btbd17        | 734   | -4.75 | -2.25 | 6.4E-24 | -5.87 | -2.55 | 1.6E-30  |
| Btbd19        | 161   | -2.27 | -1.18 | 1.6E-12 | -2.31 | -1.21 | 5.6E-13  |
| Btbd6         | 759   | -2.37 | -1.25 | 9.8E-26 | -2.28 | -1.19 | 1.8E-23  |
| Btd           | 733   | -1.99 | -0.99 | 4.2E-20 | -2.02 | -1.02 | 5.7E-21  |
| Btf3l4        | 7993  | -1.56 | -0.64 | 7.6E-10 | -1.58 | -0.66 | 2.1E-10  |
| Btg3          | 1481  | 1.92  | 0.94  | 1.5E-22 | 1.75  | 0.81  | 5.6E-17  |
| Btn2a2        | 187   | 6.94  | 2.80  | 7.0E-27 | 7.96  | 2.99  | 2.5E-30  |
| Bves          | 348   | 1.43  | 0.52  | 2.7E-03 | 1.86  | 0.89  | 1.1E-07  |
| Bzw2          | 17444 | 1.54  | 0.62  | 4.4E-20 | 1.56  | 0.64  | 2.0E-21  |
| C130074G19Rik | 948   | -1.97 | -0.98 | 3.0E-18 | -2.07 | -1.05 | 1.0E-20  |
| C1d           | 4742  | -1.56 | -0.64 | 3.1E-11 | -1.52 | -0.60 | 4.2E-10  |
| C1galt1       | 3395  | 1.41  | 0.49  | 3.6E-04 | 1.57  | 0.65  | 1.5E-06  |
| C1galt1c1     | 859   | -1.41 | -0.49 | 5.0E-08 | -1.31 | -0.39 | 2.2E-05  |
| C1qa          | 319   | -1.50 | -0.58 | 1.6E-03 | -1.52 | -0.60 | 1.2E-03  |
| C1qb          | 574   | -1.29 | -0.37 | 2.9E-02 | -1.31 | -0.39 | 2.2E-02  |
| C1qc          | 389   | -1.33 | -0.42 | 1.0E-02 | -1.40 | -0.49 | 2.4E-03  |
| C1ql1         | 439   | 1.80  | 0.85  | 8.0E-05 | 1.60  | 0.68  | 2.0E-03  |
| C1qtnf1       | 444   | -1.45 | -0.53 | 2.7E-04 | -1.43 | -0.52 | 4.5E-04  |
| C1qtnf2       | 139   | -1.99 | -0.99 | 1.2E-04 | -2.13 | -1.09 | 2.5E-05  |
| C1qtnf3       | 468   | -6.03 | -2.59 | 4.3E-03 | -5.12 | -2.35 | 1.0E-02  |
| C1qtnf6       | 999   | -2.16 | -1.11 | 2.3E-06 | -2.26 | -1.18 | 5.4E-07  |

|               |       |       |       |         |       |       |         |
|---------------|-------|-------|-------|---------|-------|-------|---------|
| C2cd2         | 2170  | 1.43  | 0.52  | 5.8E-15 | 1.43  | 0.51  | 1.8E-14 |
| C2cd2l        | 2917  | 2.23  | 1.16  | 9.0E-17 | 1.99  | 0.99  | 1.3E-12 |
| C2cd3         | 5598  | -1.95 | -0.97 | 2.3E-29 | -1.78 | -0.83 | 3.8E-22 |
| C2cd4c        | 507   | 3.89  | 1.96  | 1.7E-25 | 3.76  | 1.91  | 3.0E-24 |
| C2cd5         | 6100  | -1.54 | -0.62 | 1.9E-20 | -1.50 | -0.59 | 3.3E-18 |
| C330018D20Rik | 1208  | -1.57 | -0.66 | 1.9E-18 | -1.57 | -0.65 | 2.5E-18 |
| C3ar1         | 150   | -3.43 | -1.78 | 1.9E-16 | -4.18 | -2.06 | 1.9E-21 |
| C77080        | 1982  | 1.87  | 0.90  | 2.1E-13 | 1.69  | 0.76  | 9.7E-10 |
| C9orf72       | 4763  | 1.74  | 0.80  | 6.8E-17 | 1.79  | 0.84  | 2.4E-18 |
| Cabin1        | 8714  | 1.32  | 0.40  | 1.3E-05 | 1.33  | 0.42  | 5.1E-06 |
| Cables1       | 400   | -1.40 | -0.49 | 4.5E-05 | -1.35 | -0.43 | 3.6E-04 |
| Cabp1         | 1881  | 2.68  | 1.42  | 1.2E-09 | 3.27  | 1.71  | 1.9E-13 |
| Cabp7         | 196   | 1.59  | 0.67  | 8.2E-03 | 1.59  | 0.67  | 8.2E-03 |
| Cacna1b       | 6214  | 1.34  | 0.42  | 4.7E-02 | 1.42  | 0.50  | 1.7E-02 |
| Cacna1c       | 3446  | -1.47 | -0.55 | 3.1E-03 | -1.38 | -0.47 | 1.5E-02 |
| Cacna2d1      | 9393  | -1.84 | -0.88 | 2.7E-08 | -1.59 | -0.67 | 3.0E-05 |
| Cacnb2        | 498   | -2.08 | -1.06 | 9.5E-13 | -1.80 | -0.85 | 1.2E-08 |
| Cacng4        | 9218  | -1.41 | -0.50 | 4.0E-04 | -1.39 | -0.48 | 6.8E-04 |
| Cacng5        | 350   | 2.70  | 1.44  | 7.1E-09 | 2.95  | 1.56  | 3.2E-10 |
| Cacul1        | 8840  | 1.25  | 0.33  | 6.2E-06 | 1.20  | 0.26  | 4.4E-04 |
| Cacybp        | 11670 | 1.44  | 0.53  | 9.8E-10 | 1.45  | 0.54  | 4.1E-10 |
| Cadm1         | 12690 | 1.25  | 0.32  | 1.3E-02 | 1.28  | 0.36  | 5.3E-03 |
| Cadm3         | 12942 | 1.41  | 0.50  | 3.4E-02 | 1.46  | 0.55  | 2.0E-02 |
| Calcoco1      | 6000  | 1.69  | 0.75  | 5.4E-25 | 1.65  | 0.72  | 6.7E-23 |
| Calcr1        | 1048  | -1.37 | -0.46 | 8.9E-03 | -1.40 | -0.49 | 5.1E-03 |
| Calm1         | 52234 | 1.44  | 0.52  | 1.0E-23 | 1.44  | 0.53  | 2.4E-24 |
| Calm14        | 151   | -1.90 | -0.93 | 5.4E-03 | -1.71 | -0.77 | 2.4E-02 |
| Camk1         | 1971  | -1.61 | -0.69 | 5.9E-24 | -1.60 | -0.67 | 5.7E-23 |
| Camk2a        | 4142  | 1.94  | 0.95  | 1.6E-07 | 1.84  | 0.88  | 1.4E-06 |
| Camk2n2       | 1252  | 1.58  | 0.66  | 3.0E-03 | 1.57  | 0.65  | 4.0E-03 |
| Camkk1        | 2077  | 2.66  | 1.41  | 7.2E-41 | 2.53  | 1.34  | 6.9E-37 |
| Camkk2        | 5909  | 1.61  | 0.68  | 2.2E-08 | 1.59  | 0.67  | 4.2E-08 |
| Camkv         | 1980  | 2.50  | 1.32  | 3.4E-28 | 2.30  | 1.20  | 1.1E-23 |
| Camsap1       | 13218 | -1.26 | -0.33 | 1.6E-02 | -1.27 | -0.35 | 9.7E-03 |
| Cand1         | 17691 | -1.20 | -0.26 | 8.7E-06 | -1.26 | -0.33 | 1.0E-08 |
| Capn1         | 489   | -1.80 | -0.85 | 2.4E-03 | -1.84 | -0.88 | 1.6E-03 |
| Capn2         | 7231  | -1.71 | -0.78 | 3.3E-17 | -1.73 | -0.79 | 1.1E-17 |
| Capn5         | 2088  | 1.56  | 0.64  | 1.6E-07 | 1.64  | 0.72  | 4.5E-09 |
| Capn7         | 8313  | 1.25  | 0.32  | 2.3E-03 | 1.31  | 0.39  | 1.3E-04 |
| Capns1        | 8743  | 1.34  | 0.42  | 3.7E-07 | 1.28  | 0.36  | 1.7E-05 |
| Caprin1       | 55348 | -1.58 | -0.66 | 1.3E-21 | -1.59 | -0.67 | 1.8E-22 |
| Caprin2       | 3184  | 1.25  | 0.32  | 1.4E-03 | 1.31  | 0.39  | 1.0E-04 |
| Car14         | 812   | -1.43 | -0.51 | 1.9E-02 | -1.65 | -0.72 | 6.9E-04 |
| Car15         | 130   | 1.72  | 0.78  | 1.2E-03 | 1.64  | 0.71  | 3.3E-03 |
| Car5b         | 228   | 5.57  | 2.48  | 5.3E-32 | 5.97  | 2.58  | 3.6E-34 |
| Car8          | 332   | 2.53  | 1.34  | 2.6E-19 | 2.40  | 1.26  | 3.0E-17 |
| Card10        | 814   | 2.42  | 1.28  | 3.3E-14 | 2.34  | 1.23  | 3.4E-13 |

|           |       |        |       |          |       |       |         |
|-----------|-------|--------|-------|----------|-------|-------|---------|
| Card19    | 435   | 2.20   | 1.13  | 1.2E-12  | 2.43  | 1.28  | 1.1E-15 |
| Card6     | 193   | -1.36  | -0.44 | 5.6E-03  | -1.27 | -0.34 | 3.5E-02 |
| Carf      | 1365  | -1.32  | -0.40 | 8.0E-05  | -1.21 | -0.28 | 8.2E-03 |
| Carhsp1   | 20590 | 1.83   | 0.87  | 1.9E-25  | 1.65  | 0.72  | 9.2E-18 |
| Carm1     | 6783  | -1.40  | -0.48 | 1.9E-06  | -1.52 | -0.61 | 1.4E-09 |
| Carmil1   | 1707  | -1.35  | -0.43 | 4.6E-08  | -1.37 | -0.46 | 9.1E-09 |
| Cars      | 3887  | 1.29   | 0.37  | 2.9E-06  | 1.19  | 0.25  | 2.4E-03 |
| Casc1     | 491   | 3.30   | 1.72  | 1.3E-43  | 3.90  | 1.96  | 1.1E-55 |
| Casd1     | 4406  | -2.83  | -1.50 | 1.1E-69  | -2.67 | -1.42 | 2.8E-62 |
| Cask      | 10174 | -1.30  | -0.37 | 4.7E-03  | -1.24 | -0.31 | 2.3E-02 |
| Casp3     | 16566 | 1.37   | 0.45  | 1.3E-13  | 1.40  | 0.49  | 1.0E-15 |
| Casp6     | 1948  | 1.32   | 0.40  | 1.1E-03  | 1.21  | 0.28  | 2.8E-02 |
| Casp7     | 707   | -3.14  | -1.65 | 6.0E-76  | -3.16 | -1.66 | 1.8E-76 |
| Casp8     | 570   | -2.31  | -1.21 | 1.3E-09  | -2.43 | -1.28 | 1.0E-10 |
| Casp8ap2  | 8583  | 1.32   | 0.40  | 1.6E-03  | 1.51  | 0.59  | 1.6E-06 |
| Casp9     | 3031  | 1.53   | 0.62  | 4.9E-34  | 1.56  | 0.64  | 1.2E-36 |
| Casq2     | 132   | -14.04 | -3.81 | 5.9E-04  | -7.48 | -2.90 | 1.1E-02 |
| Castor1   | 129   | 1.99   | 0.99  | 1.3E-05  | 2.06  | 1.04  | 5.6E-06 |
| Castor2   | 10331 | 2.01   | 1.00  | 1.3E-11  | 1.90  | 0.92  | 5.4E-10 |
| Casz1     | 1306  | 2.43   | 1.28  | 2.5E-08  | 3.00  | 1.59  | 3.2E-12 |
| Catsper2  | 311   | -2.49  | -1.31 | 4.5E-21  | -2.32 | -1.21 | 4.0E-18 |
| Catsperg1 | 507   | 1.77   | 0.82  | 3.0E-05  | 1.97  | 0.98  | 5.1E-07 |
| Cav1      | 1285  | -2.23  | -1.16 | 1.1E-05  | -2.08 | -1.05 | 7.4E-05 |
| Cav2      | 468   | -1.73  | -0.79 | 3.3E-07  | -1.60 | -0.68 | 1.7E-05 |
| Cavin2    | 477   | -2.96  | -1.56 | 8.5E-07  | -2.44 | -1.29 | 6.2E-05 |
| Cavin3    | 596   | -2.31  | -1.21 | 6.8E-15  | -2.62 | -1.39 | 3.7E-19 |
| Cavin4    | 374   | -1.36  | -0.44 | 4.9E-03  | -1.41 | -0.50 | 1.6E-03 |
| Cbfa2t3   | 2680  | -2.22  | -1.15 | 6.2E-05  | -2.21 | -1.14 | 7.2E-05 |
| Cbfb      | 7215  | -1.39  | -0.48 | 3.6E-07  | -1.37 | -0.46 | 1.2E-06 |
| Cbln2     | 2008  | -1.82  | -0.87 | 1.5E-05  | -1.71 | -0.78 | 1.2E-04 |
| Cbr4      | 986   | -1.63  | -0.70 | 4.3E-12  | -1.68 | -0.75 | 1.2E-13 |
| Cbs       | 736   | 5.02   | 2.33  | 2.1E-38  | 5.08  | 2.35  | 7.7E-39 |
| Cbwd1     | 1852  | 1.62   | 0.70  | 1.5E-14  | 1.58  | 0.66  | 4.1E-13 |
| Cbx3      | 15310 | -1.55  | -0.63 | 4.3E-07  | -1.63 | -0.70 | 1.4E-08 |
| Cbx4      | 1849  | 1.40   | 0.48  | 1.1E-06  | 1.32  | 0.41  | 5.5E-05 |
| Cbx5      | 44773 | -1.40  | -0.48 | 2.2E-08  | -1.40 | -0.49 | 1.9E-08 |
| Cbx7      | 1830  | 4.93   | 2.30  | 1.3E-101 | 4.72  | 2.24  | 7.4E-96 |
| Cbx8      | 1833  | 1.49   | 0.58  | 5.5E-05  | 1.39  | 0.48  | 1.0E-03 |
| Cc2d1a    | 2014  | -1.38  | -0.47 | 3.6E-03  | -1.44 | -0.52 | 1.1E-03 |
| Cc2d1b    | 3193  | -1.42  | -0.51 | 5.1E-15  | -1.41 | -0.50 | 2.5E-14 |
| Cc2d2a    | 1640  | -2.47  | -1.30 | 3.1E-60  | -2.35 | -1.23 | 8.5E-54 |
| Ccar1     | 17537 | -1.57  | -0.65 | 3.0E-13  | -1.60 | -0.68 | 2.9E-14 |
| Ccar2     | 12647 | -1.19  | -0.25 | 1.5E-02  | -1.30 | -0.38 | 1.3E-04 |
| Ccdc102a  | 794   | -2.77  | -1.47 | 4.1E-17  | -3.02 | -1.59 | 6.1E-20 |
| Ccdc103   | 151   | 2.25   | 1.17  | 2.1E-18  | 1.98  | 0.98  | 2.2E-13 |
| Ccdc107   | 973   | 1.42   | 0.51  | 2.7E-25  | 1.46  | 0.55  | 5.4E-29 |
| Ccdc112   | 3027  | 1.72   | 0.78  | 4.7E-39  | 1.64  | 0.72  | 3.3E-33 |

|         |       |       |       |         |       |       |         |
|---------|-------|-------|-------|---------|-------|-------|---------|
| Ccdc117 | 3769  | 1.28  | 0.35  | 4.2E-07 | 1.23  | 0.30  | 2.3E-05 |
| Ccdc12  | 1430  | -2.35 | -1.23 | 5.2E-17 | -2.50 | -1.32 | 2.3E-19 |
| Ccdc125 | 149   | -2.06 | -1.04 | 6.0E-10 | -2.25 | -1.17 | 5.6E-12 |
| Ccdc127 | 6622  | 1.26  | 0.34  | 6.5E-12 | 1.32  | 0.40  | 6.4E-16 |
| Ccdc13  | 328   | 1.69  | 0.76  | 3.7E-08 | 1.61  | 0.69  | 6.3E-07 |
| Ccdc130 | 666   | -1.15 | -0.20 | 1.2E-02 | -1.25 | -0.32 | 5.5E-05 |
| Ccdc134 | 2442  | 1.86  | 0.90  | 6.7E-29 | 1.81  | 0.86  | 1.5E-26 |
| Ccdc14  | 1920  | 1.28  | 0.36  | 3.4E-03 | 1.35  | 0.43  | 3.9E-04 |
| Ccdc148 | 411   | 1.88  | 0.91  | 2.7E-08 | 1.86  | 0.89  | 5.4E-08 |
| Ccdc149 | 486   | -3.36 | -1.75 | 4.8E-22 | -3.59 | -1.84 | 3.1E-24 |
| Ccdc158 | 447   | 3.90  | 1.96  | 7.6E-48 | 3.97  | 1.99  | 1.3E-48 |
| Ccdc160 | 275   | 1.76  | 0.82  | 1.3E-10 | 1.81  | 0.86  | 1.5E-11 |
| Ccdc166 | 479   | -1.30 | -0.38 | 2.0E-04 | -1.31 | -0.39 | 1.7E-04 |
| Ccdc167 | 1711  | -1.80 | -0.85 | 1.4E-16 | -1.78 | -0.83 | 5.9E-16 |
| Ccdc171 | 970   | 1.68  | 0.75  | 8.3E-10 | 1.89  | 0.92  | 3.5E-14 |
| Ccdc173 | 710   | 1.34  | 0.42  | 2.8E-04 | 1.34  | 0.42  | 3.0E-04 |
| Ccdc174 | 2762  | -1.16 | -0.22 | 3.9E-03 | -1.25 | -0.32 | 1.5E-05 |
| Ccdc177 | 2538  | -1.77 | -0.82 | 2.7E-05 | -1.86 | -0.89 | 4.6E-06 |
| Ccdc18  | 1388  | 1.36  | 0.45  | 9.4E-03 | 1.62  | 0.70  | 2.9E-05 |
| Ccdc181 | 1227  | -1.27 | -0.35 | 6.5E-10 | -1.34 | -0.42 | 5.9E-14 |
| Ccdc184 | 1968  | 1.81  | 0.85  | 5.1E-05 | 1.77  | 0.82  | 9.9E-05 |
| Ccdc186 | 6306  | 1.34  | 0.43  | 2.7E-04 | 1.54  | 0.62  | 6.7E-08 |
| Ccdc187 | 525   | -2.65 | -1.41 | 3.0E-10 | -2.45 | -1.29 | 8.9E-09 |
| Ccdc189 | 542   | 1.67  | 0.74  | 1.4E-18 | 1.70  | 0.76  | 1.9E-19 |
| Ccdc190 | 141   | -2.71 | -1.44 | 1.3E-10 | -3.21 | -1.68 | 4.7E-14 |
| Ccdc191 | 852   | -2.36 | -1.24 | 4.3E-42 | -2.42 | -1.28 | 1.9E-44 |
| Ccdc25  | 3989  | 1.40  | 0.49  | 1.5E-07 | 1.24  | 0.31  | 1.3E-03 |
| Ccdc28a | 576   | 2.16  | 1.11  | 1.2E-23 | 2.26  | 1.18  | 3.8E-26 |
| Ccdc28b | 2212  | 1.31  | 0.39  | 5.8E-11 | 1.29  | 0.36  | 1.3E-09 |
| Ccdc3   | 720   | -1.78 | -0.83 | 2.7E-04 | -1.42 | -0.51 | 3.3E-02 |
| Ccdc30  | 1291  | 1.61  | 0.69  | 5.4E-13 | 1.66  | 0.73  | 1.5E-14 |
| Ccdc32  | 2118  | 1.96  | 0.97  | 7.1E-77 | 1.99  | 0.99  | 3.2E-79 |
| Ccdc39  | 1972  | 1.21  | 0.28  | 2.7E-02 | 1.41  | 0.49  | 4.6E-05 |
| Ccdc40  | 1640  | -1.32 | -0.40 | 1.1E-04 | -1.31 | -0.39 | 1.5E-04 |
| Ccdc50  | 15638 | -1.34 | -0.43 | 8.4E-07 | -1.22 | -0.28 | 1.6E-03 |
| Ccdc57  | 660   | -1.25 | -0.32 | 3.4E-05 | -1.28 | -0.36 | 4.4E-06 |
| Ccdc58  | 1615  | -1.63 | -0.70 | 1.6E-07 | -1.64 | -0.71 | 1.2E-07 |
| Ccdc59  | 2734  | -1.24 | -0.31 | 4.7E-07 | -1.27 | -0.34 | 2.0E-08 |
| Ccdc61  | 2023  | 2.16  | 1.11  | 1.4E-15 | 2.04  | 1.03  | 2.2E-13 |
| Ccdc62  | 466   | -1.28 | -0.36 | 5.4E-04 | -1.33 | -0.41 | 6.5E-05 |
| Ccdc65  | 140   | 1.47  | 0.56  | 8.7E-04 | 1.72  | 0.78  | 2.3E-06 |
| Ccdc71l | 1909  | -1.35 | -0.43 | 2.1E-04 | -1.34 | -0.42 | 3.2E-04 |
| Ccdc77  | 1897  | -1.25 | -0.33 | 8.9E-03 | -1.25 | -0.32 | 1.2E-02 |
| Ccdc8   | 3091  | -1.52 | -0.61 | 1.2E-05 | -1.66 | -0.73 | 1.0E-07 |
| Ccdc80  | 1279  | -1.83 | -0.87 | 3.5E-02 | -1.93 | -0.95 | 2.1E-02 |
| Ccdc81  | 105   | 1.72  | 0.78  | 3.2E-03 | 2.32  | 1.21  | 3.2E-06 |
| Ccdc82  | 4387  | 1.77  | 0.82  | 3.2E-24 | 1.88  | 0.91  | 1.3E-29 |

|         |       |       |       |         |       |       |         |
|---------|-------|-------|-------|---------|-------|-------|---------|
| Ccdc84  | 1702  | 1.76  | 0.82  | 1.2E-36 | 1.76  | 0.81  | 5.5E-36 |
| Ccdc85a | 698   | -2.16 | -1.11 | 1.1E-05 | -2.08 | -1.05 | 3.1E-05 |
| Ccdc85b | 1811  | 1.66  | 0.73  | 2.3E-18 | 1.56  | 0.64  | 2.7E-14 |
| Ccdc85c | 8705  | 1.90  | 0.93  | 4.9E-09 | 1.67  | 0.74  | 3.8E-06 |
| Ccdc89  | 319   | 2.27  | 1.19  | 3.1E-16 | 2.35  | 1.23  | 1.9E-17 |
| Ccdc9   | 3731  | -1.25 | -0.32 | 3.2E-02 | -1.40 | -0.48 | 8.4E-04 |
| Ccdc90b | 2338  | -1.40 | -0.48 | 2.8E-08 | -1.43 | -0.51 | 3.6E-09 |
| Ccdc91  | 1888  | -1.95 | -0.96 | 2.9E-49 | -1.82 | -0.87 | 4.0E-40 |
| Ccdc92  | 1216  | 1.71  | 0.77  | 4.3E-07 | 1.67  | 0.74  | 1.5E-06 |
| Ccdc93  | 5120  | 1.41  | 0.49  | 4.3E-07 | 1.57  | 0.65  | 1.2E-11 |
| Ccdc96  | 916   | 2.36  | 1.24  | 9.6E-26 | 2.25  | 1.17  | 5.4E-23 |
| Ccdc9b  | 471   | -3.05 | -1.61 | 6.3E-20 | -3.50 | -1.81 | 7.4E-25 |
| Cchr1   | 2513  | 1.51  | 0.59  | 2.9E-05 | 1.41  | 0.49  | 6.1E-04 |
| Ccm2    | 3078  | 1.42  | 0.51  | 6.5E-14 | 1.36  | 0.44  | 9.3E-11 |
| Ccm2l   | 212   | -2.42 | -1.28 | 2.5E-18 | -2.59 | -1.38 | 3.3E-21 |
| Ccn3    | 158   | -1.97 | -0.98 | 9.4E-03 | -2.01 | -1.01 | 7.7E-03 |
| Ccn4    | 1193  | -2.74 | -1.46 | 2.5E-05 | -2.72 | -1.44 | 3.1E-05 |
| Ccnb1   | 10225 | -1.36 | -0.44 | 3.9E-02 | -1.49 | -0.58 | 6.1E-03 |
| Ccnb2   | 2837  | -1.51 | -0.60 | 3.1E-03 | -1.70 | -0.76 | 1.3E-04 |
| Ccnd1   | 17325 | -1.54 | -0.63 | 7.0E-03 | -1.93 | -0.95 | 2.8E-05 |
| Ccne1   | 1957  | 1.85  | 0.89  | 1.6E-08 | 1.67  | 0.74  | 3.2E-06 |
| Ccne2   | 2220  | -1.32 | -0.40 | 1.7E-02 | -1.46 | -0.55 | 9.0E-04 |
| Ccng1   | 5463  | 1.49  | 0.57  | 2.9E-08 | 1.58  | 0.66  | 1.4E-10 |
| Ccng2   | 9036  | -1.43 | -0.52 | 2.1E-09 | -1.44 | -0.53 | 1.2E-09 |
| Ccnh    | 4084  | 1.61  | 0.69  | 1.3E-14 | 1.63  | 0.70  | 5.7E-15 |
| Ccnj    | 3077  | -1.80 | -0.85 | 3.1E-08 | -2.09 | -1.06 | 2.8E-12 |
| Ccnjl   | 1366  | 1.32  | 0.40  | 5.5E-03 | 1.26  | 0.33  | 2.7E-02 |
| Ccnl1   | 7139  | -1.48 | -0.57 | 3.4E-21 | -1.45 | -0.53 | 9.0E-19 |
| Ccnl2   | 14250 | -1.53 | -0.62 | 1.4E-22 | -1.56 | -0.64 | 2.4E-24 |
| Ccnyl1  | 4081  | 1.64  | 0.71  | 1.9E-20 | 1.52  | 0.61  | 4.0E-15 |
| Ccpg1   | 364   | 1.28  | 0.35  | 1.4E-02 | 1.30  | 0.38  | 8.6E-03 |
| Ccsap   | 878   | 2.02  | 1.01  | 4.5E-17 | 1.95  | 0.96  | 1.9E-15 |
| Ccz1    | 4162  | -1.33 | -0.41 | 4.0E-08 | -1.34 | -0.43 | 8.4E-09 |
| Cd1d1   | 1511  | -2.80 | -1.49 | 9.0E-33 | -2.75 | -1.46 | 1.6E-31 |
| Cd200   | 4220  | -2.05 | -1.03 | 1.3E-04 | -2.05 | -1.04 | 1.2E-04 |
| Cd24a   | 41102 | -1.71 | -0.77 | 2.9E-09 | -1.62 | -0.70 | 9.9E-08 |
| Cd276   | 3140  | -2.13 | -1.09 | 5.0E-36 | -2.18 | -1.13 | 2.4E-38 |
| Cd2bp2  | 8250  | -1.41 | -0.50 | 1.0E-08 | -1.55 | -0.63 | 3.5E-13 |
| Cd320   | 1616  | 1.42  | 0.50  | 1.8E-06 | 1.46  | 0.54  | 2.4E-07 |
| Cd33    | 184   | -2.17 | -1.12 | 2.4E-16 | -2.06 | -1.05 | 1.2E-14 |
| Cd36    | 285   | -2.06 | -1.04 | 1.3E-03 | -1.67 | -0.74 | 2.8E-02 |
| Cd38    | 232   | -1.84 | -0.88 | 8.7E-05 | -1.90 | -0.93 | 3.5E-05 |
| Cd3eap  | 2035  | 1.75  | 0.81  | 1.2E-17 | 1.61  | 0.69  | 5.0E-13 |
| Cd40    | 239   | 1.34  | 0.42  | 2.4E-03 | 1.22  | 0.29  | 4.6E-02 |
| Cd44    | 597   | -1.79 | -0.84 | 9.1E-03 | -1.65 | -0.72 | 2.8E-02 |
| Cd46    | 481   | -1.70 | -0.77 | 9.4E-06 | -1.71 | -0.78 | 8.2E-06 |
| Cd55    | 250   | -2.57 | -1.36 | 4.2E-05 | -2.23 | -1.16 | 5.9E-04 |



|          |       |       |       |         |       |       |         |
|----------|-------|-------|-------|---------|-------|-------|---------|
| Cd68     | 471   | -1.25 | -0.33 | 6.6E-04 | -1.48 | -0.57 | 8.0E-10 |
| Cd83     | 264   | -1.94 | -0.96 | 1.4E-05 | -1.82 | -0.86 | 1.1E-04 |
| Cd93     | 3630  | -1.56 | -0.65 | 1.4E-14 | -1.59 | -0.67 | 1.2E-15 |
| Cdan1    | 3766  | 1.34  | 0.42  | 2.6E-09 | 1.31  | 0.39  | 7.8E-08 |
| Cdc14b   | 2432  | 1.80  | 0.85  | 1.0E-13 | 1.81  | 0.86  | 6.2E-14 |
| Cdc20    | 4773  | -1.38 | -0.46 | 2.0E-02 | -1.63 | -0.71 | 2.3E-04 |
| Cdc23    | 10337 | -1.28 | -0.36 | 1.2E-09 | -1.34 | -0.42 | 1.2E-12 |
| Cdc26    | 5117  | -1.31 | -0.39 | 3.3E-05 | -1.35 | -0.43 | 3.8E-06 |
| Cdc37    | 12052 | 1.31  | 0.39  | 7.2E-04 | 1.22  | 0.29  | 1.4E-02 |
| Cdc40    | 4695  | 1.41  | 0.49  | 4.2E-10 | 1.45  | 0.54  | 9.1E-12 |
| Cdc42bpb | 14607 | 1.34  | 0.42  | 2.8E-04 | 1.31  | 0.39  | 9.7E-04 |
| Cdc42ep1 | 456   | -1.82 | -0.87 | 8.3E-07 | -1.93 | -0.95 | 6.5E-08 |
| Cdc42ep2 | 579   | 1.33  | 0.41  | 4.2E-02 | 1.42  | 0.51  | 1.2E-02 |
| Cdc42ep3 | 1376  | -1.42 | -0.51 | 4.9E-06 | -1.44 | -0.53 | 2.1E-06 |
| Cdca2    | 3963  | -1.48 | -0.56 | 7.6E-04 | -1.52 | -0.61 | 2.8E-04 |
| Cdca4    | 4171  | -1.25 | -0.32 | 2.6E-02 | -1.41 | -0.49 | 4.2E-04 |
| Cdh11    | 12820 | -2.40 | -1.26 | 2.1E-06 | -2.37 | -1.24 | 3.3E-06 |
| Cdh2     | 18934 | -1.42 | -0.51 | 1.1E-06 | -1.53 | -0.62 | 2.5E-09 |
| Cdh5     | 3922  | -1.44 | -0.53 | 9.4E-05 | -1.57 | -0.65 | 1.2E-06 |
| Cdin1    | 1528  | -1.24 | -0.31 | 4.3E-04 | -1.25 | -0.32 | 3.3E-04 |
| Cdip1    | 7843  | 1.37  | 0.45  | 1.3E-23 | 1.34  | 0.42  | 5.0E-20 |
| Cdk1     | 5461  | -1.27 | -0.34 | 4.9E-02 | -1.31 | -0.39 | 2.4E-02 |
| Cdk12    | 4941  | -1.37 | -0.45 | 3.4E-13 | -1.34 | -0.42 | 9.2E-12 |
| Cdk18    | 156   | 2.59  | 1.37  | 2.5E-04 | 2.52  | 1.33  | 3.9E-04 |
| Cdk2     | 6622  | 1.41  | 0.49  | 2.7E-04 | 1.34  | 0.42  | 2.0E-03 |
| Cdk20    | 833   | 1.51  | 0.59  | 3.0E-06 | 1.36  | 0.45  | 5.6E-04 |
| Cdk2ap1  | 6508  | -2.04 | -1.03 | 7.8E-18 | -2.29 | -1.19 | 1.9E-23 |
| Cdk4     | 28254 | -1.36 | -0.45 | 6.5E-04 | -1.52 | -0.60 | 3.1E-06 |
| Cdk5     | 4008  | 1.32  | 0.40  | 5.4E-11 | 1.28  | 0.36  | 4.3E-09 |
| Cdk5r1   | 11497 | -1.50 | -0.58 | 2.3E-02 | -1.52 | -0.60 | 1.9E-02 |
| Cdk5r2   | 2504  | 1.78  | 0.83  | 3.4E-05 | 1.72  | 0.78  | 1.1E-04 |
| Cdk5rap1 | 577   | -1.31 | -0.39 | 1.7E-02 | -1.56 | -0.64 | 4.9E-05 |
| Cdk5rap2 | 8016  | -1.37 | -0.45 | 6.2E-04 | -1.27 | -0.34 | 1.2E-02 |
| Cdk6     | 3329  | -1.68 | -0.75 | 4.5E-07 | -1.72 | -0.78 | 1.6E-07 |
| Cdka1    | 1026  | -1.29 | -0.36 | 1.9E-06 | -1.34 | -0.42 | 2.1E-08 |
| Cdkl1    | 110   | -1.52 | -0.60 | 1.2E-02 | -1.46 | -0.55 | 2.4E-02 |
| Cdkl3    | 1310  | 1.30  | 0.38  | 4.0E-05 | 1.36  | 0.45  | 1.5E-06 |
| Cdkl5    | 3056  | 1.71  | 0.77  | 5.9E-08 | 1.95  | 0.96  | 9.5E-12 |
| Cdkn1a   | 2143  | 2.19  | 1.13  | 3.0E-16 | 2.27  | 1.18  | 9.8E-18 |
| Cdkn1c   | 22953 | -1.44 | -0.53 | 5.6E-03 | -1.43 | -0.51 | 7.3E-03 |
| Cdkn2d   | 2103  | 1.74  | 0.80  | 1.5E-25 | 1.81  | 0.85  | 5.3E-29 |
| Cdkn3    | 834   | 1.63  | 0.70  | 7.2E-04 | 1.55  | 0.63  | 2.5E-03 |
| Cdo1     | 3567  | -1.51 | -0.59 | 5.1E-06 | -1.44 | -0.53 | 5.5E-05 |
| Cdon     | 13736 | -1.37 | -0.45 | 4.4E-04 | -1.20 | -0.27 | 4.7E-02 |
| Cdpf1    | 498   | 1.42  | 0.51  | 4.7E-06 | 1.38  | 0.46  | 3.8E-05 |
| Cdr2     | 3434  | 1.61  | 0.69  | 2.1E-21 | 1.61  | 0.68  | 3.9E-21 |
| Cds2     | 13091 | 1.52  | 0.61  | 1.7E-07 | 1.58  | 0.66  | 1.1E-08 |

|         |       |       |       |         |       |       |         |
|---------|-------|-------|-------|---------|-------|-------|---------|
| Cdyl2   | 247   | -1.56 | -0.64 | 5.1E-04 | -1.35 | -0.44 | 2.3E-02 |
| Cebpa   | 309   | 2.22  | 1.15  | 9.5E-05 | 2.31  | 1.21  | 3.9E-05 |
| Celf6   | 1504  | 1.51  | 0.60  | 1.1E-03 | 1.44  | 0.53  | 4.8E-03 |
| Cemip   | 1137  | -1.97 | -0.98 | 1.5E-03 | -2.09 | -1.06 | 5.6E-04 |
| Cenpa   | 5877  | -1.41 | -0.50 | 3.5E-03 | -1.51 | -0.59 | 4.5E-04 |
| Cenj    | 3591  | 1.54  | 0.62  | 1.2E-06 | 1.52  | 0.60  | 3.0E-06 |
| Cenpp   | 917   | 1.59  | 0.67  | 1.3E-03 | 1.59  | 0.67  | 1.3E-03 |
| Cenps   | 654   | -2.01 | -1.00 | 5.9E-10 | -2.27 | -1.18 | 2.4E-13 |
| Cenpu   | 1602  | 1.76  | 0.82  | 3.9E-05 | 1.65  | 0.72  | 3.3E-04 |
| Cenpx   | 1493  | 1.36  | 0.44  | 1.3E-06 | 1.25  | 0.32  | 4.6E-04 |
| Cep126  | 1964  | 1.72  | 0.78  | 4.1E-28 | 1.95  | 0.96  | 3.6E-42 |
| Cep135  | 2358  | -1.51 | -0.60 | 7.3E-09 | -1.38 | -0.46 | 9.7E-06 |
| Cep152  | 2567  | 1.45  | 0.54  | 1.2E-03 | 1.52  | 0.61  | 2.7E-04 |
| Cep162  | 4241  | 1.45  | 0.54  | 5.3E-07 | 1.60  | 0.68  | 1.4E-10 |
| Cep164  | 5199  | 1.84  | 0.88  | 8.2E-20 | 1.80  | 0.85  | 1.2E-18 |
| Cep170  | 22187 | -1.49 | -0.58 | 1.9E-04 | -1.31 | -0.39 | 1.6E-02 |
| Cep192  | 9075  | 1.50  | 0.59  | 3.7E-04 | 1.70  | 0.77  | 2.1E-06 |
| Cep20   | 3063  | -1.50 | -0.59 | 9.8E-16 | -1.54 | -0.62 | 1.6E-17 |
| Cep250  | 8284  | -1.40 | -0.48 | 2.0E-05 | -1.40 | -0.48 | 1.8E-05 |
| Cep41   | 1580  | -1.91 | -0.93 | 2.3E-44 | -1.94 | -0.96 | 1.8E-46 |
| Cep44   | 2453  | 1.28  | 0.35  | 1.7E-07 | 1.36  | 0.44  | 6.8E-11 |
| Cep5711 | 853   | -1.99 | -1.00 | 9.0E-30 | -1.94 | -0.96 | 1.8E-27 |
| Cep63   | 2728  | -1.97 | -0.98 | 4.3E-57 | -1.95 | -0.97 | 1.5E-55 |
| Cep68   | 4986  | -1.29 | -0.37 | 5.3E-12 | -1.28 | -0.36 | 3.3E-11 |
| Cep72   | 1922  | -1.46 | -0.54 | 3.4E-06 | -1.41 | -0.50 | 2.3E-05 |
| Cep78   | 4427  | 1.38  | 0.47  | 3.5E-07 | 1.33  | 0.41  | 9.9E-06 |
| Cep83   | 5442  | 1.54  | 0.62  | 3.0E-21 | 1.56  | 0.65  | 8.8E-23 |
| Cep85   | 3229  | 1.79  | 0.84  | 3.1E-37 | 1.78  | 0.84  | 1.5E-36 |
| Cep97   | 3828  | -1.35 | -0.43 | 1.5E-04 | -1.26 | -0.34 | 3.7E-03 |
| Cept1   | 2373  | -1.33 | -0.41 | 1.1E-09 | -1.31 | -0.39 | 7.5E-09 |
| Cerk    | 2810  | -1.27 | -0.34 | 4.6E-03 | -1.25 | -0.33 | 7.6E-03 |
| Cers2   | 3488  | -2.42 | -1.27 | 1.1E-71 | -2.49 | -1.32 | 1.5E-76 |
| Cers5   | 4273  | -1.42 | -0.51 | 1.6E-12 | -1.37 | -0.46 | 2.7E-10 |
| Cetn3   | 7685  | -1.39 | -0.48 | 2.7E-05 | -1.37 | -0.45 | 8.6E-05 |
| Cfap126 | 172   | -1.70 | -0.77 | 1.5E-03 | -1.59 | -0.67 | 6.8E-03 |
| Cfap20  | 4759  | 1.52  | 0.60  | 5.2E-27 | 1.40  | 0.48  | 9.6E-18 |
| Cfap206 | 296   | 2.51  | 1.33  | 3.1E-10 | 2.84  | 1.51  | 8.6E-13 |
| Cfap298 | 916   | -1.56 | -0.64 | 1.4E-12 | -1.66 | -0.73 | 6.3E-16 |
| Cfap300 | 1539  | 1.66  | 0.73  | 2.5E-23 | 1.70  | 0.77  | 1.3E-25 |
| Cfap36  | 4695  | 1.46  | 0.55  | 8.3E-15 | 1.47  | 0.56  | 2.7E-15 |
| Cfap410 | 1559  | 1.53  | 0.62  | 7.3E-19 | 1.46  | 0.55  | 6.2E-15 |
| Cfap45  | 282   | 2.89  | 1.53  | 2.4E-25 | 2.78  | 1.47  | 2.3E-23 |
| Cfap53  | 101   | 1.79  | 0.84  | 4.2E-05 | 1.78  | 0.83  | 5.4E-05 |
| Cfap54  | 468   | 1.55  | 0.63  | 6.9E-03 | 1.81  | 0.85  | 2.0E-04 |
| Cfap69  | 2479  | 2.92  | 1.55  | 1.3E-45 | 3.42  | 1.77  | 1.9E-59 |
| Cfap70  | 206   | 2.50  | 1.32  | 1.3E-13 | 2.45  | 1.29  | 4.4E-13 |
| Cfap74  | 568   | -1.40 | -0.48 | 1.7E-06 | -1.39 | -0.48 | 2.5E-06 |

|         |       |       |       |          |       |       |          |
|---------|-------|-------|-------|----------|-------|-------|----------|
| Cfap77  | 122   | 3.23  | 1.69  | 1.5E-26  | 3.01  | 1.59  | 3.7E-23  |
| Cfap97  | 2423  | -1.46 | -0.54 | 3.7E-16  | -1.37 | -0.45 | 1.5E-11  |
| Cfl2    | 11017 | -1.27 | -0.34 | 1.2E-03  | -1.31 | -0.39 | 2.2E-04  |
| Cflar   | 1690  | -1.35 | -0.43 | 1.9E-06  | -1.26 | -0.34 | 2.8E-04  |
| Cfp     | 1881  | 1.60  | 0.68  | 3.8E-09  | 1.55  | 0.64  | 4.4E-08  |
| Cgn     | 2200  | 3.58  | 1.84  | 8.6E-68  | 3.79  | 1.92  | 1.4E-73  |
| Cgref1  | 306   | -2.15 | -1.10 | 4.0E-06  | -1.99 | -0.99 | 4.0E-05  |
| Cgrrf1  | 981   | 2.19  | 1.13  | 2.0E-27  | 2.01  | 1.00  | 8.4E-22  |
| Chac1   | 122   | 2.27  | 1.18  | 1.6E-07  | 2.17  | 1.12  | 6.5E-07  |
| Chac2   | 562   | 1.40  | 0.48  | 1.2E-05  | 1.39  | 0.48  | 1.7E-05  |
| Chadl   | 173   | -3.87 | -1.95 | 1.1E-06  | -3.53 | -1.82 | 6.6E-06  |
| Chaf1b  | 3562  | 2.01  | 1.01  | 9.2E-10  | 1.77  | 0.83  | 6.5E-07  |
| Champ1  | 6108  | -1.18 | -0.24 | 1.0E-06  | -1.25 | -0.33 | 2.1E-11  |
| Chchd1  | 2480  | -1.43 | -0.51 | 1.4E-07  | -1.48 | -0.56 | 8.2E-09  |
| Chchd10 | 361   | 3.40  | 1.77  | 2.6E-37  | 3.34  | 1.74  | 6.1E-36  |
| Chchd5  | 727   | -1.29 | -0.37 | 1.1E-04  | -1.31 | -0.39 | 5.1E-05  |
| Chchd7  | 3824  | 3.11  | 1.64  | 4.1E-86  | 3.15  | 1.65  | 6.6E-88  |
| Chd1l   | 784   | -3.66 | -1.87 | 4.5E-33  | -4.14 | -2.05 | 2.2E-39  |
| Chd2    | 12282 | 1.21  | 0.28  | 2.5E-02  | 1.35  | 0.43  | 3.5E-04  |
| Chd3    | 39510 | -1.98 | -0.99 | 9.7E-21  | -2.00 | -1.00 | 3.8E-21  |
| Chd7    | 13012 | -1.35 | -0.44 | 1.4E-02  | -1.33 | -0.42 | 2.0E-02  |
| Chfr    | 8151  | 1.31  | 0.39  | 1.1E-11  | 1.32  | 0.40  | 7.9E-12  |
| Chga    | 3469  | 1.71  | 0.78  | 5.8E-05  | 1.76  | 0.82  | 2.3E-05  |
| Chka    | 6804  | 1.63  | 0.71  | 1.0E-27  | 1.73  | 0.79  | 3.2E-34  |
| Chmp2a  | 3720  | -1.31 | -0.39 | 1.4E-12  | -1.32 | -0.40 | 1.9E-13  |
| Chmp2b  | 4359  | 1.74  | 0.80  | 2.0E-08  | 1.73  | 0.79  | 2.7E-08  |
| Chmp3   | 3350  | -2.78 | -1.48 | 1.4E-199 | -2.68 | -1.42 | 5.3E-185 |
| Chmp6   | 1978  | -1.30 | -0.38 | 4.5E-04  | -1.41 | -0.50 | 3.7E-06  |
| Chn2    | 1592  | -1.27 | -0.34 | 9.9E-03  | -1.35 | -0.43 | 1.1E-03  |
| Chodl   | 420   | -2.04 | -1.03 | 3.2E-03  | -1.70 | -0.76 | 3.3E-02  |
| Chp1    | 9369  | 2.04  | 1.03  | 8.9E-62  | 2.00  | 1.00  | 9.8E-59  |
| Chpf    | 2567  | 1.82  | 0.87  | 5.5E-13  | 1.71  | 0.77  | 1.6E-10  |
| Chrac1  | 769   | -2.63 | -1.39 | 1.4E-41  | -2.75 | -1.46 | 2.6E-45  |
| Chrm4   | 208   | 11.36 | 3.51  | 2.0E-48  | 8.27  | 3.05  | 5.5E-38  |
| Chrna3  | 653   | -3.04 | -1.60 | 1.9E-19  | -2.56 | -1.35 | 3.8E-14  |
| Chrna5  | 623   | 3.27  | 1.71  | 6.1E-13  | 4.22  | 2.08  | 1.7E-18  |
| Chrna7  | 408   | 1.28  | 0.36  | 9.1E-03  | 1.42  | 0.51  | 1.9E-04  |
| Chrn2   | 4806  | -1.36 | -0.44 | 2.1E-02  | -1.31 | -0.39 | 4.6E-02  |
| Chrn4   | 184   | 1.99  | 0.99  | 1.6E-07  | 2.11  | 1.07  | 1.2E-08  |
| Chst11  | 2891  | 1.29  | 0.37  | 4.1E-03  | 1.40  | 0.48  | 1.6E-04  |
| Chst12  | 580   | 1.57  | 0.65  | 4.0E-04  | 1.48  | 0.57  | 2.2E-03  |
| Chst14  | 715   | -1.49 | -0.58 | 2.8E-02  | -1.61 | -0.69 | 8.8E-03  |
| Chst15  | 2424  | -1.96 | -0.97 | 1.4E-22  | -2.03 | -1.02 | 6.0E-25  |
| Chst3   | 1295  | -1.36 | -0.44 | 6.1E-05  | -1.43 | -0.52 | 2.1E-06  |
| Chst7   | 181   | 2.41  | 1.27  | 1.9E-19  | 2.33  | 1.22  | 5.7E-18  |
| Chst8   | 639   | 1.32  | 0.40  | 3.0E-04  | 1.29  | 0.37  | 9.5E-04  |
| Chtf18  | 2217  | 1.61  | 0.69  | 8.3E-04  | 1.36  | 0.44  | 3.9E-02  |

|          |       |       |       |         |       |       |         |
|----------|-------|-------|-------|---------|-------|-------|---------|
| Chtop    | 18206 | -1.44 | -0.53 | 8.7E-23 | -1.45 | -0.53 | 3.6E-23 |
| Churc1   | 154   | -1.31 | -0.39 | 2.0E-02 | -1.26 | -0.34 | 4.9E-02 |
| Ciao1    | 3298  | 1.32  | 0.40  | 1.4E-14 | 1.32  | 0.41  | 7.6E-15 |
| Ciao2b   | 1229  | 1.32  | 0.40  | 7.2E-05 | 1.18  | 0.24  | 2.4E-02 |
| Cib1     | 1177  | 2.12  | 1.09  | 8.8E-21 | 1.88  | 0.91  | 6.9E-15 |
| Cibar1   | 3133  | -1.70 | -0.76 | 3.3E-18 | -1.66 | -0.73 | 1.3E-16 |
| Cilk1    | 5801  | -1.24 | -0.31 | 9.9E-03 | -1.30 | -0.38 | 1.6E-03 |
| Cilp2    | 132   | 1.94  | 0.96  | 4.0E-04 | 2.18  | 1.13  | 3.0E-05 |
| Cinp     | 2804  | 1.55  | 0.63  | 2.2E-14 | 1.51  | 0.59  | 8.5E-13 |
| Cipc     | 5271  | -1.29 | -0.37 | 3.6E-03 | -1.38 | -0.47 | 1.8E-04 |
| Cisd2    | 5288  | -1.41 | -0.50 | 1.0E-06 | -1.53 | -0.61 | 1.0E-09 |
| Cisd3    | 485   | 2.01  | 1.00  | 5.9E-28 | 1.84  | 0.88  | 1.0E-21 |
| Cish     | 654   | 1.36  | 0.44  | 5.7E-04 | 1.28  | 0.36  | 5.4E-03 |
| Cited1   | 266   | 2.30  | 1.20  | 4.0E-22 | 2.14  | 1.10  | 8.1E-19 |
| Ckap2    | 4326  | -1.24 | -0.31 | 3.8E-02 | -1.29 | -0.36 | 1.3E-02 |
| Ckap2l   | 4485  | -1.61 | -0.69 | 1.2E-05 | -1.77 | -0.82 | 1.2E-07 |
| Ckap4    | 7252  | -1.41 | -0.50 | 1.7E-04 | -1.52 | -0.60 | 5.0E-06 |
| Clba1    | 343   | 2.73  | 1.45  | 6.4E-61 | 2.53  | 1.34  | 4.6E-53 |
| Clcn1    | 1327  | 1.73  | 0.79  | 6.8E-08 | 1.74  | 0.80  | 4.8E-08 |
| Clcn2    | 4232  | 1.41  | 0.49  | 4.1E-08 | 1.38  | 0.46  | 2.8E-07 |
| Clcn3    | 10982 | 1.40  | 0.49  | 1.8E-07 | 1.46  | 0.54  | 4.1E-09 |
| Clcn4    | 10609 | -1.57 | -0.65 | 1.3E-06 | -1.48 | -0.56 | 3.5E-05 |
| Clcn6    | 8009  | 1.34  | 0.42  | 1.2E-06 | 1.31  | 0.39  | 6.2E-06 |
| Clcn7    | 4232  | 1.25  | 0.32  | 5.5E-07 | 1.25  | 0.32  | 3.9E-07 |
| Cldn15   | 125   | 3.24  | 1.70  | 2.4E-18 | 3.38  | 1.76  | 2.0E-19 |
| Cldn34c1 | 671   | -1.54 | -0.63 | 2.4E-06 | -1.55 | -0.64 | 1.6E-06 |
| Cldn5    | 1246  | -1.61 | -0.69 | 4.5E-07 | -1.76 | -0.82 | 1.6E-09 |
| Cldnd1   | 5844  | 1.33  | 0.41  | 2.2E-19 | 1.32  | 0.40  | 3.2E-18 |
| Clec14a  | 759   | -3.29 | -1.72 | 3.6E-27 | -3.43 | -1.78 | 6.6E-29 |
| Clec16a  | 5184  | 1.68  | 0.75  | 6.9E-18 | 1.69  | 0.76  | 1.8E-18 |
| Clec1a   | 118   | -1.94 | -0.95 | 1.7E-05 | -1.72 | -0.78 | 5.0E-04 |
| Clec2d   | 138   | -2.73 | -1.45 | 9.0E-10 | -2.87 | -1.52 | 1.4E-10 |
| Clec2l   | 312   | -1.62 | -0.69 | 1.3E-03 | -1.62 | -0.70 | 1.3E-03 |
| Clic6    | 1509  | -1.80 | -0.85 | 3.4E-04 | -1.58 | -0.66 | 6.3E-03 |
| Clip1    | 8820  | -1.76 | -0.81 | 2.0E-17 | -1.70 | -0.76 | 2.4E-15 |
| Clk1     | 14069 | -1.55 | -0.63 | 2.0E-18 | -1.47 | -0.56 | 1.3E-14 |
| Clk4     | 7583  | -1.41 | -0.49 | 1.1E-08 | -1.34 | -0.42 | 1.1E-06 |
| Clmn     | 1658  | -1.54 | -0.62 | 5.0E-04 | -1.39 | -0.47 | 9.7E-03 |
| Clmp     | 6553  | -2.55 | -1.35 | 9.1E-41 | -2.47 | -1.30 | 6.7E-38 |
| Cln6     | 704   | -1.48 | -0.56 | 2.7E-05 | -1.62 | -0.70 | 1.8E-07 |
| Cln8     | 2506  | 1.77  | 0.82  | 2.3E-31 | 1.68  | 0.75  | 4.8E-26 |
| Clptm1   | 6600  | 1.28  | 0.35  | 3.2E-07 | 1.20  | 0.27  | 1.2E-04 |
| Clspn    | 3913  | -1.40 | -0.49 | 8.2E-03 | -1.59 | -0.67 | 2.2E-04 |
| Cltb     | 2795  | 1.51  | 0.60  | 1.9E-03 | 1.61  | 0.68  | 3.4E-04 |
| Cluap1   | 1198  | -1.30 | -0.37 | 2.9E-06 | -1.32 | -0.41 | 3.8E-07 |
| Cluh     | 5623  | 1.87  | 0.90  | 1.6E-20 | 1.84  | 0.88  | 2.2E-19 |
| Clvs1    | 2618  | -1.44 | -0.53 | 2.3E-03 | -1.36 | -0.44 | 1.1E-02 |

|         |       |       |       |         |       |       |         |
|---------|-------|-------|-------|---------|-------|-------|---------|
| Clvs2   | 420   | -2.15 | -1.10 | 8.9E-08 | -2.02 | -1.01 | 1.0E-06 |
| Cmc2    | 1014  | 1.68  | 0.75  | 4.6E-10 | 1.69  | 0.76  | 3.6E-10 |
| Cmc4    | 460   | -1.27 | -0.34 | 2.4E-03 | -1.31 | -0.39 | 4.4E-04 |
| Cmklr1  | 181   | -1.51 | -0.59 | 1.3E-03 | -1.60 | -0.67 | 2.3E-04 |
| Cmpk1   | 6914  | -1.59 | -0.67 | 9.0E-17 | -1.64 | -0.71 | 1.5E-18 |
| Cmpk2   | 785   | 1.26  | 0.33  | 2.5E-02 | 1.26  | 0.33  | 2.4E-02 |
| Cmss1   | 735   | -1.21 | -0.27 | 2.5E-02 | -1.27 | -0.34 | 3.8E-03 |
| Cmtm3   | 1767  | -2.68 | -1.42 | 1.6E-13 | -2.72 | -1.45 | 6.9E-14 |
| Cmtm4   | 9730  | 1.69  | 0.76  | 9.8E-31 | 1.80  | 0.85  | 2.4E-38 |
| Cmtm6   | 2645  | 1.70  | 0.76  | 5.0E-21 | 1.64  | 0.71  | 2.3E-18 |
| Cmtm8   | 340   | 1.77  | 0.83  | 2.6E-07 | 2.06  | 1.04  | 7.7E-11 |
| Cmtr1   | 1355  | 1.43  | 0.51  | 2.0E-09 | 1.38  | 0.46  | 8.8E-08 |
| Cmtr2   | 951   | -1.61 | -0.68 | 1.0E-14 | -1.53 | -0.61 | 7.0E-12 |
| Cnbd2   | 267   | 1.27  | 0.34  | 1.5E-02 | 1.22  | 0.28  | 4.8E-02 |
| Cndp2   | 5492  | 1.77  | 0.82  | 5.6E-22 | 1.67  | 0.74  | 4.3E-18 |
| Cnih4   | 3610  | 1.38  | 0.47  | 4.7E-09 | 1.31  | 0.39  | 1.0E-06 |
| Cnksr3  | 908   | 1.58  | 0.66  | 5.5E-09 | 1.44  | 0.53  | 3.9E-06 |
| Cnmd    | 909   | -4.16 | -2.06 | 3.9E-03 | -3.51 | -1.81 | 1.2E-02 |
| Cnm2    | 1491  | 2.06  | 1.04  | 1.6E-18 | 2.25  | 1.17  | 6.5E-23 |
| Cnm4    | 1746  | 2.91  | 1.54  | 2.7E-34 | 2.79  | 1.48  | 9.9E-32 |
| Cnot2   | 7847  | -1.52 | -0.61 | 7.8E-21 | -1.53 | -0.61 | 5.1E-21 |
| Cnot6   | 21529 | -1.36 | -0.44 | 2.0E-05 | -1.41 | -0.49 | 1.7E-06 |
| Cnot7   | 13952 | -1.26 | -0.33 | 6.4E-04 | -1.31 | -0.39 | 6.4E-05 |
| Cnot8   | 4283  | -1.24 | -0.31 | 1.1E-07 | -1.28 | -0.35 | 1.2E-09 |
| Cnpy2   | 3064  | -1.54 | -0.63 | 7.0E-12 | -1.53 | -0.62 | 1.3E-11 |
| Cnpy4   | 2653  | -1.45 | -0.54 | 1.1E-07 | -1.60 | -0.68 | 1.9E-11 |
| Cnr1    | 6596  | -2.09 | -1.07 | 6.8E-05 | -1.84 | -0.88 | 1.2E-03 |
| Cnrip1  | 1388  | -1.74 | -0.80 | 3.6E-04 | -1.68 | -0.75 | 8.8E-04 |
| Cntd1   | 112   | -1.36 | -0.44 | 7.8E-03 | -1.42 | -0.51 | 2.7E-03 |
| Cntln   | 2662  | -1.76 | -0.82 | 4.9E-14 | -1.69 | -0.75 | 4.3E-12 |
| Cntn2   | 19589 | -1.55 | -0.63 | 9.7E-03 | -1.46 | -0.55 | 2.7E-02 |
| Cntnap2 | 11429 | 1.42  | 0.51  | 7.8E-04 | 1.26  | 0.33  | 3.6E-02 |
| Cntrl   | 6499  | -1.34 | -0.42 | 1.6E-03 | -1.24 | -0.31 | 2.4E-02 |
| Coa6    | 515   | 1.22  | 0.29  | 5.0E-04 | 1.34  | 0.42  | 2.0E-07 |
| Coa7    | 1488  | -1.47 | -0.56 | 8.8E-14 | -1.55 | -0.63 | 2.1E-17 |
| Cobl    | 961   | -1.46 | -0.55 | 8.8E-03 | -1.44 | -0.52 | 1.3E-02 |
| Coch    | 684   | 1.53  | 0.61  | 1.6E-04 | 1.61  | 0.69  | 2.1E-05 |
| Cog1    | 2647  | -1.82 | -0.86 | 2.4E-47 | -1.85 | -0.89 | 4.9E-50 |
| Cog4    | 3889  | -1.22 | -0.29 | 1.5E-03 | -1.31 | -0.39 | 1.5E-05 |
| Cog6    | 4067  | -1.25 | -0.32 | 5.5E-06 | -1.20 | -0.27 | 1.5E-04 |
| Cog7    | 1381  | -1.24 | -0.31 | 2.4E-08 | -1.28 | -0.35 | 7.3E-11 |
| Coil    | 2073  | -2.22 | -1.15 | 1.3E-47 | -2.36 | -1.24 | 7.5E-55 |
| Col12a1 | 13954 | -2.79 | -1.48 | 6.4E-03 | -2.53 | -1.34 | 1.5E-02 |
| Col14a1 | 1956  | -2.72 | -1.44 | 2.3E-02 | -2.62 | -1.39 | 3.0E-02 |
| Col15a1 | 1651  | -2.06 | -1.04 | 3.0E-05 | -2.04 | -1.03 | 3.9E-05 |
| Col16a1 | 3628  | -2.17 | -1.12 | 1.3E-02 | -2.44 | -1.29 | 3.8E-03 |
| Col17a1 | 289   | -4.53 | -2.18 | 1.8E-02 | -4.98 | -2.32 | 1.2E-02 |

|         |       |       |       |         |       |       |         |
|---------|-------|-------|-------|---------|-------|-------|---------|
| Col20a1 | 387   | 1.87  | 0.90  | 3.3E-04 | 2.41  | 1.27  | 3.2E-07 |
| Col27a1 | 2555  | -2.36 | -1.24 | 4.8E-05 | -2.07 | -1.05 | 6.6E-04 |
| Col2a1  | 22191 | -2.13 | -1.09 | 1.7E-03 | -2.00 | -1.00 | 4.6E-03 |
| Col3a1  | 56698 | -1.71 | -0.77 | 1.7E-02 | -1.80 | -0.85 | 9.1E-03 |
| Col5a2  | 17331 | -1.65 | -0.72 | 1.3E-02 | -1.75 | -0.81 | 5.2E-03 |
| Col6a2  | 6048  | -1.76 | -0.82 | 2.1E-02 | -1.75 | -0.81 | 2.3E-02 |
| Col6a3  | 8071  | -2.05 | -1.04 | 3.6E-03 | -1.85 | -0.89 | 1.4E-02 |
| Col6a6  | 212   | -4.15 | -2.05 | 3.8E-04 | -4.13 | -2.05 | 4.2E-04 |
| Col8a1  | 1772  | -3.32 | -1.73 | 1.7E-03 | -2.95 | -1.56 | 5.1E-03 |
| Col9a1  | 3311  | -3.79 | -1.92 | 6.7E-03 | -2.85 | -1.51 | 3.7E-02 |
| Col9a2  | 2538  | -3.06 | -1.62 | 2.7E-04 | -2.57 | -1.36 | 2.5E-03 |
| Col9a3  | 3814  | -3.25 | -1.70 | 5.2E-04 | -2.85 | -1.51 | 2.3E-03 |
| Commd3  | 3042  | -1.28 | -0.36 | 1.7E-05 | -1.22 | -0.29 | 5.1E-04 |
| Commd4  | 2514  | -1.29 | -0.37 | 3.6E-05 | -1.33 | -0.41 | 3.0E-06 |
| Commd7  | 2340  | -1.36 | -0.45 | 3.8E-13 | -1.42 | -0.51 | 9.3E-17 |
| Copa    | 36394 | 1.28  | 0.35  | 2.5E-04 | 1.33  | 0.41  | 2.1E-05 |
| Coprs   | 1510  | 1.44  | 0.52  | 1.1E-22 | 1.41  | 0.49  | 2.6E-20 |
| Cops3   | 7303  | -1.50 | -0.58 | 1.9E-10 | -1.51 | -0.60 | 6.2E-11 |
| Cops7a  | 2650  | -1.42 | -0.51 | 1.1E-10 | -1.50 | -0.59 | 4.2E-14 |
| Coq10b  | 1729  | 1.44  | 0.52  | 9.3E-13 | 1.44  | 0.53  | 6.0E-13 |
| Coq2    | 2309  | -1.51 | -0.59 | 1.4E-31 | -1.52 | -0.61 | 4.9E-33 |
| Coq3    | 770   | -1.20 | -0.26 | 3.2E-03 | -1.26 | -0.34 | 1.3E-04 |
| Coq7    | 1063  | -2.45 | -1.29 | 2.6E-22 | -2.89 | -1.53 | 8.6E-31 |
| Coq8a   | 206   | 2.22  | 1.15  | 3.2E-06 | 2.46  | 1.30  | 1.2E-07 |
| Coro1c  | 16337 | 1.54  | 0.62  | 1.6E-07 | 1.38  | 0.46  | 1.3E-04 |
| Coro2b  | 4077  | -1.92 | -0.94 | 2.7E-08 | -1.96 | -0.97 | 8.4E-09 |
| Coro7   | 4182  | 2.14  | 1.10  | 1.1E-33 | 2.07  | 1.05  | 6.5E-31 |
| Cotl1   | 9672  | 1.60  | 0.67  | 1.7E-10 | 1.48  | 0.57  | 1.1E-07 |
| Cox10   | 978   | -1.58 | -0.66 | 3.2E-08 | -1.66 | -0.73 | 8.6E-10 |
| Cox15   | 1961  | -1.52 | -0.60 | 2.7E-18 | -1.63 | -0.71 | 7.6E-25 |
| Cox5a   | 6087  | 1.34  | 0.42  | 4.6E-04 | 1.25  | 0.32  | 1.1E-02 |
| Cox6a1  | 5372  | 1.35  | 0.44  | 6.6E-06 | 1.23  | 0.30  | 2.5E-03 |
| Cox6b2  | 1118  | 2.93  | 1.55  | 3.4E-12 | 2.39  | 1.26  | 2.4E-08 |
| Cpa4    | 183   | -2.84 | -1.51 | 2.0E-11 | -3.27 | -1.71 | 2.1E-14 |
| Cpd     | 10366 | 1.55  | 0.63  | 8.9E-07 | 1.69  | 0.76  | 2.9E-09 |
| Cpeb1   | 415   | 2.14  | 1.10  | 3.4E-08 | 2.44  | 1.29  | 8.7E-11 |
| Cpeb3   | 1400  | 1.63  | 0.71  | 4.0E-03 | 1.63  | 0.70  | 4.5E-03 |
| Cpeb4   | 8073  | 1.60  | 0.68  | 9.9E-05 | 1.56  | 0.64  | 2.5E-04 |
| Cplane2 | 256   | 1.54  | 0.62  | 1.2E-07 | 1.52  | 0.61  | 2.2E-07 |
| Cplx2   | 9065  | -1.54 | -0.62 | 3.9E-06 | -1.57 | -0.65 | 1.5E-06 |
| Cpne2   | 688   | -1.75 | -0.81 | 7.2E-12 | -1.99 | -0.99 | 3.5E-17 |
| Cpne3   | 5698  | 1.80  | 0.85  | 2.5E-13 | 1.98  | 0.98  | 1.4E-17 |
| Cpox    | 1946  | 1.43  | 0.51  | 5.2E-06 | 1.31  | 0.39  | 6.6E-04 |
| Cpped1  | 1131  | -2.31 | -1.21 | 3.4E-47 | -2.30 | -1.20 | 2.1E-46 |
| Cpsf4   | 3745  | 1.32  | 0.40  | 8.0E-10 | 1.29  | 0.37  | 9.1E-09 |
| Cpsf7   | 11294 | -1.50 | -0.58 | 5.6E-09 | -1.61 | -0.69 | 5.6E-12 |
| Cpt1a   | 5622  | 2.78  | 1.47  | 2.8E-81 | 2.79  | 1.48  | 1.2E-81 |



|            |       |       |       |         |       |       |         |
|------------|-------|-------|-------|---------|-------|-------|---------|
| Cpt1c      | 3037  | -1.41 | -0.50 | 6.1E-05 | -1.46 | -0.55 | 8.5E-06 |
| Cpt2       | 1271  | 1.38  | 0.46  | 4.1E-04 | 1.29  | 0.37  | 5.1E-03 |
| Cptp       | 1411  | 1.59  | 0.67  | 1.1E-23 | 1.42  | 0.50  | 7.4E-14 |
| Cpxm1      | 2037  | -1.64 | -0.72 | 8.2E-03 | -1.74 | -0.80 | 3.1E-03 |
| Cr1l       | 1897  | -2.47 | -1.30 | 3.7E-66 | -2.48 | -1.31 | 9.2E-67 |
| Crabp2     | 5842  | 1.65  | 0.72  | 1.1E-02 | 1.54  | 0.62  | 3.1E-02 |
| Cracd      | 9972  | -2.63 | -1.40 | 5.7E-15 | -2.59 | -1.37 | 1.6E-14 |
| Cracr2a    | 123   | -1.45 | -0.53 | 3.5E-04 | -1.25 | -0.32 | 4.0E-02 |
| Cradd      | 337   | -2.41 | -1.27 | 7.6E-29 | -2.67 | -1.42 | 1.1E-35 |
| Crcp       | 2318  | -1.41 | -0.50 | 3.3E-10 | -1.45 | -0.54 | 8.6E-12 |
| Creb3      | 2520  | 1.42  | 0.51  | 4.5E-15 | 1.43  | 0.52  | 1.2E-15 |
| Crebbp     | 5496  | -1.93 | -0.95 | 1.7E-10 | -2.06 | -1.04 | 2.0E-12 |
| Crebl2     | 736   | 1.50  | 0.58  | 4.5E-06 | 1.55  | 0.64  | 5.1E-07 |
| Creg1      | 1453  | 2.29  | 1.20  | 9.4E-16 | 2.33  | 1.22  | 3.0E-16 |
| Creg2      | 635   | 2.15  | 1.10  | 1.1E-05 | 2.50  | 1.32  | 1.2E-07 |
| Creld1     | 1982  | -1.33 | -0.42 | 1.1E-03 | -1.39 | -0.48 | 1.6E-04 |
| Creld2     | 2382  | 1.51  | 0.60  | 3.8E-08 | 1.42  | 0.51  | 3.4E-06 |
| Crem       | 689   | -1.46 | -0.55 | 5.5E-11 | -1.33 | -0.41 | 1.2E-06 |
| Crip2      | 6183  | 1.73  | 0.79  | 4.8E-11 | 1.60  | 0.68  | 1.9E-08 |
| Crip3      | 184   | 1.55  | 0.63  | 2.9E-02 | 1.77  | 0.82  | 3.9E-03 |
| Crispld1   | 1486  | -2.10 | -1.07 | 2.3E-04 | -2.05 | -1.04 | 3.6E-04 |
| Cr1f2      | 205   | -2.49 | -1.31 | 1.3E-10 | -2.23 | -1.16 | 1.7E-08 |
| Cr1f3      | 2219  | 1.35  | 0.44  | 1.5E-06 | 1.28  | 0.36  | 1.1E-04 |
| Crnk1l     | 5053  | 1.36  | 0.44  | 5.4E-06 | 1.37  | 0.46  | 2.5E-06 |
| Crppa      | 339   | -4.16 | -2.06 | 6.4E-39 | -4.42 | -2.14 | 6.6E-42 |
| Crtac1     | 730   | 1.35  | 0.44  | 3.8E-02 | 1.40  | 0.49  | 2.1E-02 |
| Crtap      | 1364  | -1.77 | -0.82 | 2.0E-03 | -1.84 | -0.88 | 9.6E-04 |
| Crtc1      | 3923  | -1.86 | -0.89 | 2.8E-07 | -1.99 | -1.00 | 8.4E-09 |
| Crtc3      | 1065  | -2.32 | -1.21 | 2.3E-15 | -2.44 | -1.29 | 3.7E-17 |
| Cry1       | 3590  | 2.57  | 1.36  | 1.2E-98 | 2.41  | 1.27  | 5.4E-86 |
| Cry2       | 3881  | 2.01  | 1.00  | 2.8E-27 | 1.94  | 0.95  | 1.1E-24 |
| Cryab      | 123   | -3.46 | -1.79 | 1.5E-04 | -3.23 | -1.69 | 3.9E-04 |
| Crybb3     | 192   | 6.07  | 2.60  | 1.2E-24 | 4.63  | 2.21  | 2.5E-18 |
| Cryzl2     | 408   | -1.24 | -0.31 | 2.0E-03 | -1.28 | -0.36 | 3.3E-04 |
| Cs         | 22561 | 1.44  | 0.52  | 9.5E-15 | 1.37  | 0.45  | 3.1E-11 |
| Csad       | 1597  | -2.54 | -1.34 | 5.5E-62 | -2.69 | -1.43 | 6.2E-70 |
| Csdc2      | 3302  | 1.69  | 0.76  | 6.3E-04 | 1.70  | 0.76  | 6.4E-04 |
| Csde1      | 31901 | -1.98 | -0.99 | 6.1E-40 | -2.01 | -1.00 | 3.0E-41 |
| Csf1       | 731   | -1.61 | -0.68 | 1.2E-07 | -1.80 | -0.85 | 4.1E-11 |
| Csf1r      | 1501  | -1.39 | -0.47 | 8.8E-04 | -1.46 | -0.54 | 1.2E-04 |
| Csf2ra     | 1229  | -1.87 | -0.90 | 4.1E-08 | -1.79 | -0.84 | 4.2E-07 |
| Csgalnact1 | 179   | -4.40 | -2.14 | 2.5E-08 | -3.40 | -1.76 | 5.4E-06 |
| Csnk1a1    | 29607 | -1.40 | -0.48 | 4.7E-15 | -1.39 | -0.47 | 1.5E-14 |
| Csnk1e     | 14294 | -1.44 | -0.52 | 1.2E-06 | -1.54 | -0.62 | 6.5E-09 |
| Csnk1g3    | 6823  | 1.27  | 0.34  | 9.6E-07 | 1.28  | 0.36  | 2.8E-07 |
| Csnk2a1    | 16382 | -1.27 | -0.34 | 5.8E-08 | -1.26 | -0.34 | 8.2E-08 |
| Csnk2a2    | 7023  | 1.29  | 0.37  | 2.4E-06 | 1.19  | 0.25  | 1.6E-03 |

|          |       |       |       |         |       |       |         |
|----------|-------|-------|-------|---------|-------|-------|---------|
| Csnk2b   | 5717  | 1.39  | 0.48  | 1.0E-11 | 1.32  | 0.40  | 1.4E-08 |
| Cspg4b   | 833   | -2.63 | -1.39 | 4.2E-07 | -2.09 | -1.06 | 1.6E-04 |
| Csrnp1   | 316   | 2.98  | 1.57  | 1.1E-18 | 3.18  | 1.67  | 1.2E-20 |
| Csrp1    | 4290  | 1.40  | 0.49  | 1.2E-02 | 1.46  | 0.55  | 4.7E-03 |
| Cstf1    | 2832  | -1.19 | -0.25 | 1.7E-02 | -1.28 | -0.35 | 4.5E-04 |
| Cstf2    | 8569  | -1.27 | -0.34 | 1.5E-04 | -1.22 | -0.29 | 1.7E-03 |
| Cstf3    | 8664  | 1.54  | 0.62  | 1.4E-18 | 1.51  | 0.59  | 7.3E-17 |
| Ctbp1    | 16292 | -1.57 | -0.65 | 9.3E-10 | -1.72 | -0.78 | 1.4E-13 |
| Ctbp2    | 5708  | -1.37 | -0.45 | 4.3E-08 | -1.49 | -0.57 | 2.5E-12 |
| Ctc1     | 6242  | -1.46 | -0.55 | 3.8E-14 | -1.50 | -0.59 | 3.3E-16 |
| Ctcf     | 9148  | -2.34 | -1.23 | 1.8E-38 | -2.56 | -1.36 | 6.6E-47 |
| Ctdnep1  | 3625  | -1.31 | -0.39 | 1.6E-04 | -1.45 | -0.54 | 1.1E-07 |
| Ctdp1    | 2854  | 1.45  | 0.54  | 4.2E-06 | 1.29  | 0.37  | 2.1E-03 |
| Ctdsp1   | 3876  | -1.31 | -0.39 | 1.1E-03 | -1.37 | -0.45 | 1.6E-04 |
| Ctdspl   | 1742  | -1.35 | -0.43 | 2.2E-05 | -1.40 | -0.48 | 1.9E-06 |
| Ctf1     | 217   | -1.96 | -0.97 | 7.0E-10 | -1.82 | -0.86 | 6.6E-08 |
| Cth      | 764   | 2.80  | 1.48  | 3.5E-15 | 2.58  | 1.37  | 4.4E-13 |
| Ctnnal1  | 3594  | 1.38  | 0.47  | 1.6E-05 | 1.36  | 0.45  | 3.8E-05 |
| Ctnnbip1 | 5198  | 1.49  | 0.58  | 7.0E-14 | 1.42  | 0.50  | 1.1E-10 |
| Ctnnbl1  | 5721  | 1.36  | 0.45  | 4.6E-05 | 1.29  | 0.37  | 8.7E-04 |
| Ctns     | 2248  | 1.62  | 0.70  | 1.4E-24 | 1.57  | 0.65  | 2.5E-21 |
| Ctps     | 6445  | -1.23 | -0.30 | 3.5E-04 | -1.28 | -0.35 | 2.2E-05 |
| Ctr9     | 13165 | 1.54  | 0.62  | 1.2E-27 | 1.54  | 0.62  | 1.4E-27 |
| Ctsf     | 2119  | 1.51  | 0.59  | 2.2E-14 | 1.58  | 0.66  | 1.1E-17 |
| Ctsk     | 939   | -1.80 | -0.85 | 1.6E-04 | -1.73 | -0.79 | 4.9E-04 |
| Ctsl     | 7274  | 1.76  | 0.82  | 2.5E-17 | 1.84  | 0.88  | 5.9E-20 |
| Ctso     | 456   | -1.88 | -0.91 | 2.0E-13 | -1.86 | -0.90 | 5.1E-13 |
| Ctu2     | 1465  | 1.42  | 0.51  | 1.7E-06 | 1.29  | 0.37  | 7.8E-04 |
| Ctxn1    | 4659  | -1.61 | -0.68 | 1.4E-07 | -1.67 | -0.74 | 1.1E-08 |
| Cul1     | 12269 | -1.66 | -0.74 | 2.9E-19 | -1.71 | -0.78 | 2.3E-21 |
| Cul4b    | 6130  | -1.37 | -0.46 | 4.5E-08 | -1.34 | -0.43 | 4.0E-07 |
| Cul5     | 5670  | -1.59 | -0.67 | 5.2E-13 | -1.59 | -0.67 | 5.0E-13 |
| Cul7     | 10139 | -1.69 | -0.75 | 4.5E-14 | -1.80 | -0.85 | 1.2E-17 |
| Cuta     | 2284  | 1.88  | 0.91  | 8.5E-17 | 1.78  | 0.83  | 4.3E-14 |
| Cutc     | 309   | -1.96 | -0.97 | 4.9E-10 | -1.88 | -0.91 | 5.8E-09 |
| Cwc22    | 2985  | -1.61 | -0.69 | 3.1E-17 | -1.71 | -0.77 | 3.1E-21 |
| Cwc27    | 1565  | -1.52 | -0.60 | 1.8E-07 | -1.57 | -0.65 | 2.1E-08 |
| Cwf19l2  | 2645  | -1.26 | -0.34 | 1.1E-03 | -1.25 | -0.32 | 1.9E-03 |
| Cx3cr1   | 687   | -2.05 | -1.04 | 1.2E-17 | -2.28 | -1.19 | 1.3E-22 |
| Cxcl12   | 7565  | -1.87 | -0.90 | 4.5E-06 | -1.77 | -0.82 | 3.3E-05 |
| Cxcl14   | 1869  | -3.84 | -1.94 | 2.6E-04 | -3.31 | -1.73 | 1.3E-03 |
| Cxcl16   | 107   | -1.57 | -0.66 | 1.2E-02 | -1.53 | -0.61 | 2.2E-02 |
| Cyb561   | 1603  | 1.77  | 0.82  | 3.0E-09 | 1.88  | 0.91  | 5.1E-11 |
| Cyb561d1 | 1050  | -1.83 | -0.87 | 2.6E-13 | -2.07 | -1.05 | 8.3E-19 |
| Cyb5d2   | 286   | -2.36 | -1.24 | 5.6E-29 | -2.09 | -1.06 | 1.7E-21 |
| Cyb5r1   | 2107  | 2.19  | 1.13  | 1.2E-27 | 2.07  | 1.05  | 6.6E-24 |
| Cyb5r3   | 8245  | 1.32  | 0.40  | 5.2E-04 | 1.19  | 0.26  | 3.2E-02 |

|               |       |       |       |         |       |       |         |
|---------------|-------|-------|-------|---------|-------|-------|---------|
| Cyb5rl        | 715   | 2.41  | 1.27  | 4.5E-21 | 2.17  | 1.12  | 1.3E-16 |
| Cybc1         | 3699  | 1.28  | 0.36  | 5.3E-13 | 1.29  | 0.37  | 1.8E-13 |
| Cyfip1        | 6506  | -1.45 | -0.54 | 1.4E-06 | -1.45 | -0.54 | 1.6E-06 |
| Cyfip2        | 14832 | 1.38  | 0.46  | 3.9E-03 | 1.38  | 0.47  | 3.5E-03 |
| Cyld          | 4587  | 1.98  | 0.98  | 2.2E-37 | 2.11  | 1.08  | 1.1E-44 |
| Cyp1b1        | 971   | -1.68 | -0.75 | 1.1E-04 | -1.57 | -0.65 | 8.5E-04 |
| Cyp20a1       | 1058  | -1.96 | -0.97 | 1.0E-23 | -1.92 | -0.94 | 2.7E-22 |
| Cyp2j9        | 105   | -1.97 | -0.97 | 8.6E-07 | -1.64 | -0.71 | 4.8E-04 |
| Cyp2u1        | 339   | 3.79  | 1.92  | 2.5E-30 | 3.25  | 1.70  | 5.2E-24 |
| Cyp39a1       | 2465  | 1.65  | 0.72  | 8.5E-09 | 1.61  | 0.68  | 4.8E-08 |
| Cyp46a1       | 2009  | 3.45  | 1.79  | 4.9E-32 | 3.13  | 1.65  | 2.8E-27 |
| Cyp4f16       | 1154  | -1.62 | -0.70 | 5.5E-23 | -1.51 | -0.60 | 5.1E-17 |
| Cyp4f17       | 1326  | 1.41  | 0.49  | 3.5E-07 | 1.41  | 0.50  | 2.5E-07 |
| Cyp4x1        | 281   | -2.15 | -1.10 | 3.5E-04 | -1.95 | -0.96 | 2.1E-03 |
| Cyp7b1        | 188   | -3.56 | -1.83 | 4.3E-19 | -2.86 | -1.52 | 1.7E-13 |
| Cyria         | 5583  | 1.59  | 0.67  | 7.6E-03 | 1.78  | 0.83  | 7.5E-04 |
| Cys1          | 127   | -1.85 | -0.88 | 8.1E-06 | -1.55 | -0.64 | 1.9E-03 |
| Cystm1        | 331   | 1.68  | 0.74  | 2.3E-05 | 1.76  | 0.81  | 3.4E-06 |
| Cyth2         | 6637  | -2.00 | -1.00 | 6.1E-19 | -2.08 | -1.06 | 5.1E-21 |
| Cyth3         | 4357  | 1.54  | 0.62  | 2.3E-16 | 1.55  | 0.63  | 4.8E-17 |
| Cyth4         | 285   | -2.70 | -1.43 | 1.2E-21 | -2.85 | -1.51 | 1.3E-23 |
| Cyyr1         | 443   | -2.12 | -1.08 | 4.0E-15 | -2.11 | -1.08 | 6.5E-15 |
| Czib          | 2721  | -2.23 | -1.15 | 9.0E-93 | -2.22 | -1.15 | 6.9E-92 |
| D030056L22Rik | 4096  | 1.41  | 0.50  | 2.4E-07 | 1.39  | 0.47  | 1.1E-06 |
| D11Wsu47e     | 1846  | 1.38  | 0.46  | 4.6E-07 | 1.44  | 0.52  | 1.1E-08 |
| D130043K22Rik | 412   | 1.69  | 0.76  | 6.1E-04 | 1.98  | 0.99  | 6.0E-06 |
| D16Ertd472e   | 2077  | 1.33  | 0.41  | 4.6E-07 | 1.30  | 0.37  | 4.5E-06 |
| D2hgdh        | 868   | -2.34 | -1.23 | 1.2E-86 | -2.15 | -1.11 | 2.8E-70 |
| D3Ertd751e    | 1750  | 1.32  | 0.40  | 1.2E-03 | 1.37  | 0.46  | 1.8E-04 |
| D430041D05Rik | 2958  | -1.62 | -0.70 | 9.4E-03 | -1.49 | -0.58 | 3.6E-02 |
| D5Ertd579e    | 8205  | -1.31 | -0.39 | 1.3E-03 | -1.19 | -0.26 | 4.2E-02 |
| D630003M21Rik | 489   | -3.06 | -1.61 | 4.7E-14 | -2.85 | -1.51 | 2.0E-12 |
| D630045J12Rik | 6799  | -1.84 | -0.88 | 2.8E-08 | -1.91 | -0.93 | 3.4E-09 |
| D8Ertd738e    | 3382  | 1.30  | 0.38  | 4.9E-04 | 1.24  | 0.31  | 5.9E-03 |
| Daam1         | 10455 | 1.41  | 0.50  | 2.0E-06 | 1.47  | 0.55  | 1.1E-07 |
| Daam2         | 2596  | -2.17 | -1.12 | 3.1E-08 | -1.88 | -0.91 | 8.9E-06 |
| Dab2          | 6440  | -1.69 | -0.76 | 1.0E-02 | -1.63 | -0.70 | 1.8E-02 |
| Dach1         | 7194  | -1.35 | -0.43 | 1.8E-02 | -1.45 | -0.54 | 2.5E-03 |
| Dach2         | 949   | 1.29  | 0.37  | 9.3E-03 | 1.34  | 0.42  | 2.4E-03 |
| Dact3         | 3383  | 2.51  | 1.33  | 2.8E-37 | 2.43  | 1.28  | 1.1E-34 |
| Dad1          | 4263  | 1.38  | 0.47  | 4.2E-11 | 1.36  | 0.44  | 6.1E-10 |
| Dag1          | 13119 | 1.54  | 0.62  | 1.1E-10 | 1.46  | 0.55  | 1.7E-08 |
| Dalrd3        | 2680  | 1.39  | 0.48  | 1.7E-08 | 1.36  | 0.44  | 2.1E-07 |
| Dand5         | 279   | -1.26 | -0.33 | 1.3E-02 | -1.31 | -0.39 | 3.1E-03 |
| Dap3          | 6410  | 1.46  | 0.54  | 1.9E-24 | 1.41  | 0.50  | 8.5E-21 |
| Dapk3         | 1594  | -1.34 | -0.42 | 5.2E-05 | -1.45 | -0.54 | 1.4E-07 |
| Dars2         | 2508  | 1.29  | 0.37  | 5.2E-04 | 1.27  | 0.35  | 1.2E-03 |

|          |       |       |       |         |       |       |         |
|----------|-------|-------|-------|---------|-------|-------|---------|
| Dbn1     | 29718 | -1.63 | -0.70 | 3.2E-08 | -1.72 | -0.78 | 5.9E-10 |
| Dbnidd1  | 1386  | -1.32 | -0.40 | 1.5E-02 | -1.27 | -0.35 | 3.6E-02 |
| Dbnidd2  | 793   | 1.56  | 0.64  | 1.2E-03 | 1.56  | 0.64  | 1.3E-03 |
| Dbp      | 617   | 2.06  | 1.04  | 6.1E-15 | 2.07  | 1.05  | 4.9E-15 |
| Dbr1     | 1966  | 1.34  | 0.42  | 2.1E-04 | 1.25  | 0.32  | 7.1E-03 |
| Dbt      | 2528  | 1.68  | 0.75  | 7.7E-27 | 1.66  | 0.73  | 6.3E-26 |
| Dcaf10   | 3951  | 1.37  | 0.45  | 2.0E-08 | 1.39  | 0.47  | 4.1E-09 |
| Dcaf11   | 6593  | 1.40  | 0.49  | 1.3E-15 | 1.39  | 0.48  | 3.5E-15 |
| Dcaf12   | 6873  | 1.29  | 0.37  | 3.4E-08 | 1.21  | 0.27  | 5.3E-05 |
| Dcaf12l1 | 807   | -1.67 | -0.74 | 4.7E-11 | -1.74 | -0.80 | 1.3E-12 |
| Dcaf15   | 3609  | -1.59 | -0.67 | 4.4E-11 | -1.70 | -0.76 | 3.5E-14 |
| Dcaf17   | 2623  | -1.51 | -0.59 | 3.7E-12 | -1.46 | -0.54 | 1.9E-10 |
| Dcaf6    | 3572  | 1.53  | 0.61  | 1.2E-11 | 1.54  | 0.62  | 7.1E-12 |
| Dcaf8    | 10297 | -1.66 | -0.73 | 1.4E-45 | -1.67 | -0.74 | 5.8E-47 |
| Dcblld1  | 1946  | 1.71  | 0.78  | 2.1E-30 | 1.60  | 0.68  | 1.4E-23 |
| Dcblld2  | 9176  | 1.74  | 0.80  | 2.6E-25 | 1.68  | 0.75  | 3.3E-22 |
| Dchs1    | 14620 | -2.27 | -1.18 | 1.2E-19 | -2.24 | -1.16 | 4.8E-19 |
| Dclre1a  | 861   | -2.32 | -1.22 | 2.6E-36 | -2.13 | -1.09 | 2.0E-29 |
| Dclre1c  | 2028  | 1.82  | 0.87  | 1.3E-18 | 1.97  | 0.98  | 2.5E-23 |
| Dcn      | 3091  | -2.03 | -1.02 | 4.2E-04 | -1.80 | -0.85 | 4.0E-03 |
| Dcp1a    | 3802  | -1.27 | -0.35 | 3.3E-08 | -1.28 | -0.36 | 8.4E-09 |
| Dcp1b    | 2376  | -1.31 | -0.39 | 1.6E-03 | -1.36 | -0.45 | 2.6E-04 |
| Dcps     | 2121  | -1.27 | -0.34 | 3.8E-03 | -1.34 | -0.42 | 3.2E-04 |
| Dct      | 331   | -2.12 | -1.09 | 2.9E-04 | -1.62 | -0.69 | 2.6E-02 |
| Dctn3    | 3745  | 1.47  | 0.55  | 1.4E-11 | 1.37  | 0.46  | 3.5E-08 |
| Dctn4    | 8294  | -1.38 | -0.47 | 3.3E-11 | -1.38 | -0.46 | 7.9E-11 |
| Dctpp1   | 3129  | 1.58  | 0.66  | 8.0E-06 | 1.43  | 0.52  | 5.9E-04 |
| Dcun1d2  | 3015  | 1.30  | 0.37  | 1.2E-09 | 1.34  | 0.42  | 7.9E-12 |
| Dcun1d4  | 7950  | 1.63  | 0.70  | 5.2E-24 | 1.59  | 0.67  | 1.1E-21 |
| Dcxr     | 432   | 4.29  | 2.10  | 7.8E-33 | 3.82  | 1.93  | 5.0E-28 |
| Ddb2     | 1301  | 1.33  | 0.41  | 4.3E-13 | 1.34  | 0.42  | 1.2E-13 |
| Ddc      | 823   | -1.30 | -0.38 | 1.8E-02 | -1.35 | -0.43 | 6.1E-03 |
| Ddhd1    | 5364  | 1.50  | 0.59  | 2.7E-06 | 1.57  | 0.65  | 1.4E-07 |
| Ddi2     | 7416  | 1.26  | 0.34  | 6.9E-05 | 1.23  | 0.30  | 5.0E-04 |
| Ddit3    | 543   | 1.56  | 0.64  | 2.9E-09 | 1.46  | 0.54  | 7.1E-07 |
| Ddn      | 163   | 2.13  | 1.09  | 1.0E-03 | 2.21  | 1.14  | 5.9E-04 |
| Ddr1     | 11079 | -1.86 | -0.90 | 5.0E-10 | -2.09 | -1.06 | 1.2E-13 |
| Ddr2     | 5445  | -2.47 | -1.31 | 2.6E-03 | -2.11 | -1.08 | 1.5E-02 |
| Ddrgk1   | 1924  | -1.73 | -0.79 | 2.3E-15 | -1.86 | -0.89 | 3.8E-19 |
| Ddx1     | 13757 | -1.24 | -0.31 | 2.2E-04 | -1.31 | -0.39 | 2.8E-06 |
| Ddx10    | 4240  | 1.69  | 0.76  | 6.1E-22 | 1.65  | 0.73  | 2.8E-20 |
| Ddx11    | 3633  | 1.54  | 0.62  | 1.4E-05 | 1.41  | 0.50  | 6.2E-04 |
| Ddx18    | 3951  | -1.18 | -0.24 | 4.2E-02 | -1.28 | -0.35 | 2.3E-03 |
| Ddx31    | 1299  | 1.29  | 0.37  | 5.9E-07 | 1.25  | 0.32  | 1.7E-05 |
| Ddx39b   | 23977 | -1.46 | -0.55 | 3.8E-07 | -1.63 | -0.71 | 3.7E-11 |
| Ddx3x    | 52188 | -1.58 | -0.66 | 5.5E-09 | -1.63 | -0.71 | 4.1E-10 |
| Ddx4     | 255   | 1.62  | 0.69  | 8.2E-11 | 1.92  | 0.94  | 3.5E-18 |

|         |       |       |       |         |       |       |         |
|---------|-------|-------|-------|---------|-------|-------|---------|
| Ddx43   | 183   | 4.49  | 2.17  | 3.7E-40 | 4.36  | 2.12  | 3.2E-38 |
| Ddx46   | 18570 | 1.33  | 0.41  | 9.8E-09 | 1.40  | 0.49  | 5.5E-12 |
| Ddx47   | 5207  | -1.26 | -0.33 | 1.3E-08 | -1.30 | -0.38 | 5.9E-11 |
| Ddx5    | 96299 | -1.55 | -0.63 | 3.2E-16 | -1.54 | -0.62 | 6.8E-16 |
| Ddx52   | 4427  | -1.39 | -0.47 | 6.5E-05 | -1.38 | -0.47 | 7.7E-05 |
| Ddx59   | 785   | -1.38 | -0.46 | 4.6E-07 | -1.42 | -0.50 | 4.5E-08 |
| Ddx6    | 31286 | -1.65 | -0.72 | 1.5E-13 | -1.65 | -0.72 | 1.2E-13 |
| Deaf1   | 3240  | -1.47 | -0.55 | 4.7E-07 | -1.57 | -0.65 | 2.5E-09 |
| Decr1   | 1576  | -1.29 | -0.37 | 5.7E-03 | -1.35 | -0.43 | 1.0E-03 |
| Decr2   | 1465  | -1.41 | -0.49 | 4.0E-18 | -1.48 | -0.56 | 4.3E-23 |
| Dedd2   | 2426  | 2.40  | 1.26  | 2.0E-34 | 2.27  | 1.18  | 2.8E-30 |
| Def6    | 165   | -2.25 | -1.17 | 3.0E-13 | -2.37 | -1.25 | 6.7E-15 |
| Def8    | 3147  | -1.66 | -0.73 | 3.4E-30 | -1.77 | -0.82 | 3.4E-38 |
| Dele1   | 3442  | -2.00 | -1.00 | 3.5E-38 | -2.12 | -1.08 | 1.8E-44 |
| Dennd1b | 2370  | -1.61 | -0.69 | 5.6E-09 | -1.54 | -0.62 | 1.7E-07 |
| Dennd2c | 724   | 1.57  | 0.65  | 2.2E-03 | 1.69  | 0.75  | 3.3E-04 |
| Dennd3  | 722   | 3.25  | 1.70  | 6.8E-49 | 3.32  | 1.73  | 4.3E-50 |
| Dennd4a | 3995  | 1.70  | 0.76  | 7.5E-10 | 1.95  | 0.96  | 4.8E-15 |
| Dennd4b | 1868  | -1.35 | -0.43 | 8.8E-04 | -1.42 | -0.51 | 8.1E-05 |
| Dennd4c | 3654  | 1.31  | 0.39  | 4.8E-03 | 1.54  | 0.62  | 3.5E-06 |
| Depdc1a | 2152  | -1.61 | -0.68 | 3.2E-05 | -1.58 | -0.66 | 5.9E-05 |
| Depdc5  | 6414  | 1.60  | 0.68  | 1.5E-25 | 1.66  | 0.73  | 5.1E-29 |
| Depdc7  | 341   | 3.69  | 1.88  | 5.7E-45 | 2.96  | 1.57  | 9.6E-32 |
| Deptor  | 656   | 2.82  | 1.49  | 3.6E-08 | 3.42  | 1.77  | 4.7E-11 |
| Desi1   | 5067  | 1.87  | 0.90  | 2.9E-22 | 1.72  | 0.78  | 5.3E-17 |
| Desi2   | 156   | 2.14  | 1.10  | 1.5E-03 | 1.65  | 0.72  | 4.6E-02 |
| Det1    | 761   | -1.56 | -0.64 | 5.1E-13 | -1.63 | -0.70 | 1.6E-15 |
| Deup1   | 152   | -2.16 | -1.11 | 5.9E-05 | -1.90 | -0.93 | 9.2E-04 |
| Dexi    | 1203  | 1.73  | 0.79  | 2.2E-28 | 1.73  | 0.79  | 7.7E-28 |
| Dffa    | 2410  | 1.46  | 0.54  | 1.7E-07 | 1.39  | 0.47  | 7.1E-06 |
| Dffb    | 721   | -1.22 | -0.28 | 4.0E-04 | -1.34 | -0.42 | 9.8E-08 |
| Dgat2   | 654   | 1.83  | 0.88  | 3.1E-15 | 1.75  | 0.81  | 3.9E-13 |
| Dgke    | 4603  | 1.70  | 0.77  | 2.4E-11 | 1.93  | 0.95  | 9.4E-17 |
| Dgkh    | 2714  | 1.35  | 0.43  | 2.3E-02 | 1.65  | 0.72  | 8.2E-05 |
| Dgkq    | 4510  | 1.47  | 0.56  | 3.0E-10 | 1.43  | 0.52  | 6.1E-09 |
| Dgkz    | 5474  | 1.29  | 0.36  | 1.2E-04 | 1.21  | 0.27  | 5.1E-03 |
| Dglucy  | 138   | -2.10 | -1.07 | 7.0E-08 | -1.77 | -0.82 | 5.3E-05 |
| Dguok   | 1403  | -1.42 | -0.50 | 5.4E-21 | -1.43 | -0.52 | 6.9E-22 |
| Dhcr24  | 11186 | 1.71  | 0.77  | 6.2E-07 | 1.53  | 0.62  | 9.2E-05 |
| Dhcr7   | 4286  | 1.56  | 0.64  | 6.0E-08 | 1.38  | 0.46  | 1.2E-04 |
| Dhdds   | 4891  | 1.45  | 0.53  | 4.8E-12 | 1.35  | 0.43  | 3.1E-08 |
| Dhdh    | 392   | -2.06 | -1.04 | 5.1E-10 | -2.38 | -1.25 | 6.0E-14 |
| Dhfr    | 4614  | 1.56  | 0.64  | 3.7E-04 | 1.38  | 0.47  | 1.1E-02 |
| Dhrs1   | 3342  | 1.39  | 0.47  | 5.1E-10 | 1.37  | 0.45  | 3.9E-09 |
| Dhrs11  | 413   | 1.60  | 0.67  | 2.0E-04 | 1.57  | 0.65  | 3.7E-04 |
| Dhrs13  | 824   | -1.49 | -0.57 | 3.0E-06 | -1.56 | -0.64 | 1.3E-07 |
| Dhrs3   | 373   | -2.92 | -1.54 | 1.4E-07 | -2.74 | -1.46 | 8.1E-07 |

|        |       |       |       |          |       |       |          |
|--------|-------|-------|-------|----------|-------|-------|----------|
| Dhrs4  | 1450  | -1.80 | -0.85 | 4.4E-15  | -1.86 | -0.90 | 9.1E-17  |
| Dhrs7  | 292   | 1.40  | 0.49  | 1.1E-05  | 1.34  | 0.42  | 2.1E-04  |
| Dhtkd1 | 2346  | 2.25  | 1.17  | 1.1E-34  | 2.45  | 1.29  | 3.8E-42  |
| Dhx16  | 4807  | 1.45  | 0.54  | 1.6E-07  | 1.31  | 0.39  | 1.7E-04  |
| Dhx29  | 6663  | 1.59  | 0.67  | 1.0E-18  | 1.60  | 0.68  | 4.3E-19  |
| Dhx30  | 9045  | -1.55 | -0.63 | 3.6E-20  | -1.65 | -0.72 | 7.1E-26  |
| Dhx32  | 3663  | 1.46  | 0.54  | 2.5E-06  | 1.27  | 0.35  | 3.8E-03  |
| Dhx34  | 1346  | -1.48 | -0.57 | 3.7E-05  | -1.58 | -0.66 | 1.4E-06  |
| Dhx35  | 1732  | -1.39 | -0.48 | 2.0E-08  | -1.47 | -0.55 | 6.8E-11  |
| Dhx38  | 4641  | -1.31 | -0.39 | 4.5E-04  | -1.47 | -0.56 | 2.6E-07  |
| Dhx40  | 7658  | 1.49  | 0.58  | 7.0E-09  | 1.36  | 0.44  | 1.6E-05  |
| Dhx58  | 230   | 1.68  | 0.75  | 1.2E-06  | 1.69  | 0.76  | 1.1E-06  |
| Diaph1 | 5191  | 1.37  | 0.46  | 6.0E-07  | 1.29  | 0.36  | 9.0E-05  |
| Dido1  | 10630 | -1.25 | -0.32 | 1.7E-04  | -1.18 | -0.24 | 6.3E-03  |
| Dip2b  | 6915  | -1.26 | -0.34 | 3.0E-03  | -1.28 | -0.36 | 1.7E-03  |
| Dip2c  | 3203  | -2.00 | -1.00 | 2.1E-11  | -1.94 | -0.95 | 1.9E-10  |
| Dipk1a | 1834  | 1.25  | 0.32  | 1.1E-04  | 1.24  | 0.31  | 2.3E-04  |
| Dipk1b | 877   | -1.64 | -0.71 | 6.3E-10  | -1.72 | -0.79 | 7.5E-12  |
| Dipk1c | 399   | -2.10 | -1.07 | 6.2E-10  | -2.52 | -1.33 | 1.2E-14  |
| Diras1 | 1287  | -1.61 | -0.69 | 1.0E-02  | -1.50 | -0.58 | 3.2E-02  |
| Dis3l  | 1606  | -4.79 | -2.26 | 9.0E-221 | -5.27 | -2.40 | 1.1E-246 |
| Dis3l2 | 2406  | -1.30 | -0.38 | 6.4E-12  | -1.31 | -0.39 | 1.3E-12  |
| Disc1  | 150   | -2.17 | -1.12 | 8.3E-13  | -1.71 | -0.78 | 1.1E-06  |
| Disp3  | 1853  | 1.66  | 0.73  | 4.6E-03  | 1.86  | 0.89  | 5.0E-04  |
| Dixdc1 | 6724  | 1.41  | 0.50  | 1.4E-06  | 1.50  | 0.59  | 1.0E-08  |
| Dlat   | 4593  | 1.26  | 0.33  | 1.9E-07  | 1.20  | 0.26  | 8.0E-05  |
| Dlec1  | 384   | 2.92  | 1.55  | 7.0E-15  | 3.07  | 1.62  | 4.1E-16  |
| Dleu7  | 201   | -2.27 | -1.19 | 1.0E-04  | -2.42 | -1.27 | 2.8E-05  |
| Dlg5   | 6522  | -2.95 | -1.56 | 3.9E-61  | -2.96 | -1.57 | 1.3E-61  |
| Dll3   | 1323  | -1.96 | -0.97 | 2.5E-04  | -2.48 | -1.31 | 4.6E-07  |
| Dll4   | 467   | -1.23 | -0.29 | 9.3E-03  | -1.30 | -0.38 | 7.5E-04  |
| Dmac2  | 961   | -1.59 | -0.67 | 4.6E-32  | -1.66 | -0.74 | 2.7E-38  |
| Dmac2l | 751   | 1.27  | 0.34  | 3.6E-06  | 1.35  | 0.44  | 3.4E-09  |
| Dmc1   | 448   | 1.52  | 0.61  | 2.9E-06  | 1.53  | 0.61  | 2.6E-06  |
| Dmpk   | 2879  | 1.32  | 0.40  | 4.3E-03  | 1.26  | 0.33  | 2.2E-02  |
| Dmrt3  | 463   | -1.61 | -0.69 | 3.2E-02  | -1.95 | -0.96 | 2.2E-03  |
| Dmrtb1 | 808   | -1.66 | -0.73 | 5.7E-04  | -1.86 | -0.89 | 2.0E-05  |
| Dna2   | 2001  | -1.73 | -0.79 | 1.3E-09  | -1.81 | -0.86 | 4.5E-11  |
| Dnaaf2 | 349   | 1.88  | 0.91  | 1.5E-07  | 1.71  | 0.77  | 1.1E-05  |
| Dnaaf3 | 789   | 5.09  | 2.35  | 1.9E-32  | 4.34  | 2.12  | 1.6E-26  |
| Dnaaf9 | 13174 | -1.27 | -0.35 | 2.2E-03  | -1.22 | -0.29 | 1.4E-02  |
| Dnah1  | 1064  | -1.18 | -0.24 | 4.2E-02  | -1.35 | -0.43 | 2.0E-04  |
| Dnah10 | 231   | 2.35  | 1.23  | 4.2E-06  | 2.49  | 1.32  | 8.6E-07  |
| Dnah17 | 157   | 5.09  | 2.35  | 4.6E-23  | 5.86  | 2.55  | 7.3E-27  |
| Dnah2  | 868   | 1.43  | 0.51  | 2.1E-02  | 1.71  | 0.77  | 3.7E-04  |
| Dnah7a | 128   | -1.32 | -0.40 | 8.3E-03  | -1.35 | -0.44 | 4.9E-03  |
| Dnai1  | 162   | 2.08  | 1.05  | 3.7E-12  | 2.28  | 1.19  | 5.6E-15  |



|         |       |       |       |          |       |       |          |
|---------|-------|-------|-------|----------|-------|-------|----------|
| Dnai4   | 1831  | 1.64  | 0.72  | 2.0E-11  | 1.76  | 0.81  | 2.2E-14  |
| Dnaja1  | 33803 | -1.39 | -0.47 | 9.3E-09  | -1.37 | -0.46 | 2.9E-08  |
| Dnajb11 | 5675  | 1.34  | 0.43  | 6.2E-10  | 1.23  | 0.30  | 1.6E-05  |
| Dnajb12 | 1385  | -2.19 | -1.13 | 3.3E-27  | -2.49 | -1.31 | 3.7E-36  |
| Dnajb14 | 3074  | -1.60 | -0.68 | 1.4E-09  | -1.46 | -0.55 | 1.6E-06  |
| Dnajb3  | 233   | -1.25 | -0.32 | 3.5E-02  | -1.37 | -0.46 | 2.7E-03  |
| Dnajb4  | 3434  | 1.49  | 0.58  | 7.3E-22  | 1.51  | 0.59  | 6.6E-23  |
| Dnajc1  | 4220  | 1.42  | 0.50  | 1.9E-06  | 1.46  | 0.55  | 1.9E-07  |
| Dnajc12 | 1458  | 4.40  | 2.14  | 5.0E-179 | 4.66  | 2.22  | 1.6E-192 |
| Dnajc15 | 2498  | 1.45  | 0.54  | 3.7E-09  | 1.48  | 0.57  | 3.9E-10  |
| Dnajc16 | 3084  | 1.34  | 0.43  | 1.1E-07  | 1.36  | 0.45  | 2.3E-08  |
| Dnajc17 | 720   | -1.80 | -0.85 | 5.3E-11  | -1.91 | -0.94 | 3.7E-13  |
| Dnajc19 | 1159  | -1.35 | -0.44 | 1.9E-05  | -1.46 | -0.55 | 7.3E-08  |
| Dnajc21 | 2760  | 1.29  | 0.36  | 1.1E-04  | 1.24  | 0.31  | 1.3E-03  |
| Dnajc27 | 1872  | -1.48 | -0.57 | 1.1E-20  | -1.51 | -0.59 | 5.3E-22  |
| Dnajc28 | 827   | 1.56  | 0.64  | 6.2E-14  | 1.64  | 0.71  | 3.5E-17  |
| Dnajc3  | 5172  | 1.39  | 0.48  | 1.1E-05  | 1.49  | 0.58  | 9.0E-08  |
| Dnajc7  | 16769 | -1.41 | -0.49 | 1.5E-16  | -1.44 | -0.52 | 1.4E-18  |
| Dnai1   | 4156  | 1.22  | 0.29  | 1.0E-03  | 1.33  | 0.41  | 3.3E-06  |
| Dnase2a | 1349  | 2.87  | 1.52  | 2.5E-30  | 2.61  | 1.39  | 2.5E-25  |
| Dnhd1   | 1087  | 2.57  | 1.36  | 1.4E-14  | 3.22  | 1.69  | 1.1E-21  |
| Dnlz    | 2018  | -1.70 | -0.76 | 1.6E-19  | -1.84 | -0.88 | 1.0E-25  |
| Dnm2    | 8421  | 1.83  | 0.88  | 3.1E-27  | 1.74  | 0.80  | 1.2E-22  |
| Dnmt3a  | 15809 | -2.22 | -1.15 | 4.4E-38  | -2.11 | -1.07 | 3.4E-33  |
| Dnmt3b  | 1342  | 2.05  | 1.04  | 3.0E-09  | 1.94  | 0.96  | 5.0E-08  |
| Dnpep   | 5429  | 1.56  | 0.64  | 5.8E-19  | 1.43  | 0.51  | 2.0E-12  |
| Doc2a   | 401   | 1.74  | 0.80  | 3.8E-08  | 1.56  | 0.64  | 1.5E-05  |
| Dock1   | 4066  | -1.49 | -0.58 | 7.5E-04  | -1.38 | -0.47 | 7.5E-03  |
| Dock11  | 5389  | -1.52 | -0.60 | 6.0E-08  | -1.40 | -0.49 | 1.4E-05  |
| Dock5   | 1163  | -1.66 | -0.73 | 3.3E-04  | -1.59 | -0.67 | 1.1E-03  |
| Dock6   | 4532  | 1.37  | 0.46  | 8.8E-03  | 1.29  | 0.37  | 3.8E-02  |
| Dock8   | 232   | -2.26 | -1.18 | 2.3E-04  | -2.08 | -1.06 | 1.0E-03  |
| Dok1    | 427   | 1.81  | 0.86  | 2.5E-07  | 1.62  | 0.70  | 3.4E-05  |
| Dok2    | 207   | -2.13 | -1.09 | 1.0E-14  | -2.02 | -1.02 | 6.3E-13  |
| Dok3    | 943   | 1.93  | 0.95  | 3.9E-10  | 1.81  | 0.85  | 2.0E-08  |
| Dolk    | 1049  | 1.29  | 0.37  | 1.9E-04  | 1.22  | 0.28  | 5.4E-03  |
| Donson  | 2658  | 1.28  | 0.35  | 5.2E-07  | 1.24  | 0.31  | 9.9E-06  |
| Dop1b   | 4122  | 1.41  | 0.50  | 4.7E-03  | 1.47  | 0.56  | 1.5E-03  |
| Dot1l   | 8282  | -1.24 | -0.31 | 1.4E-02  | -1.25 | -0.32 | 1.4E-02  |
| Dpf3    | 2106  | 2.45  | 1.29  | 5.1E-06  | 2.85  | 1.51  | 7.5E-08  |
| Dph1    | 786   | 1.57  | 0.65  | 5.9E-09  | 1.55  | 0.63  | 1.9E-08  |
| Dph2    | 1551  | 1.56  | 0.64  | 8.5E-10  | 1.37  | 0.45  | 2.0E-05  |
| Dph3    | 2461  | -1.86 | -0.90 | 1.4E-37  | -1.96 | -0.97 | 8.2E-44  |
| Dph5    | 733   | -1.35 | -0.44 | 2.0E-07  | -1.39 | -0.48 | 1.3E-08  |
| Dph6    | 1587  | -1.49 | -0.57 | 1.2E-15  | -1.56 | -0.64 | 2.6E-19  |
| Dpm1    | 1536  | 1.52  | 0.60  | 2.2E-11  | 1.49  | 0.58  | 1.7E-10  |
| Dpp4    | 163   | -1.87 | -0.90 | 5.5E-03  | -1.69 | -0.75 | 2.3E-02  |

|         |       |       |       |         |       |       |         |
|---------|-------|-------|-------|---------|-------|-------|---------|
| Dpp7    | 1375  | 1.33  | 0.41  | 1.4E-10 | 1.38  | 0.46  | 7.7E-13 |
| Dpy19I3 | 4852  | 1.73  | 0.79  | 2.6E-32 | 1.81  | 0.85  | 1.8E-37 |
| Dpy19I4 | 5668  | 1.22  | 0.28  | 2.8E-03 | 1.33  | 0.41  | 1.1E-05 |
| Dpysl2  | 11973 | -1.40 | -0.48 | 2.7E-02 | -1.70 | -0.77 | 2.8E-04 |
| Dpysl3  | 81721 | -1.46 | -0.55 | 4.0E-03 | -1.42 | -0.51 | 8.2E-03 |
| Dqx1    | 269   | 2.72  | 1.44  | 1.9E-17 | 2.83  | 1.50  | 1.0E-18 |
| Dr1     | 6353  | 1.43  | 0.52  | 6.5E-09 | 1.31  | 0.39  | 1.7E-05 |
| Draxin  | 7093  | -1.46 | -0.54 | 1.0E-02 | -1.48 | -0.56 | 8.0E-03 |
| Drd2    | 191   | 1.98  | 0.98  | 7.8E-06 | 1.92  | 0.94  | 2.1E-05 |
| Drp2    | 4079  | -1.67 | -0.74 | 1.2E-04 | -1.67 | -0.74 | 1.3E-04 |
| Dsc2    | 211   | -4.09 | -2.03 | 1.9E-03 | -4.13 | -2.05 | 1.9E-03 |
| Dscc1   | 692   | -1.34 | -0.42 | 1.9E-02 | -1.44 | -0.53 | 3.0E-03 |
| Dse     | 2031  | -1.82 | -0.86 | 5.7E-04 | -1.85 | -0.89 | 4.1E-04 |
| Dsn1    | 2055  | -1.29 | -0.37 | 7.6E-03 | -1.35 | -0.43 | 1.8E-03 |
| Dtd1    | 889   | -1.44 | -0.53 | 7.4E-07 | -1.42 | -0.51 | 1.8E-06 |
| Dtd2    | 894   | 1.56  | 0.64  | 2.9E-09 | 1.48  | 0.56  | 2.8E-07 |
| Dtna    | 2903  | 2.01  | 1.00  | 9.3E-15 | 1.91  | 0.93  | 7.3E-13 |
| Dtnbp1  | 2370  | 1.52  | 0.60  | 3.6E-21 | 1.49  | 0.58  | 1.6E-19 |
| Dtwd1   | 519   | -1.30 | -0.37 | 6.3E-05 | -1.24 | -0.31 | 1.3E-03 |
| Dtwd2   | 221   | -4.39 | -2.13 | 4.5E-49 | -5.13 | -2.36 | 1.5E-57 |
| Dtx3I   | 382   | -2.88 | -1.53 | 1.7E-23 | -2.71 | -1.44 | 6.4E-21 |
| Dtx4    | 7804  | -1.27 | -0.34 | 4.4E-03 | -1.31 | -0.39 | 9.2E-04 |
| Dtymk   | 5211  | -1.31 | -0.39 | 1.1E-05 | -1.41 | -0.49 | 2.1E-08 |
| Dus2    | 902   | -1.70 | -0.77 | 2.1E-16 | -1.82 | -0.86 | 2.3E-20 |
| Dus3I   | 2652  | -1.91 | -0.94 | 1.2E-16 | -1.94 | -0.96 | 2.6E-17 |
| Dusp1   | 1299  | -1.64 | -0.71 | 5.0E-09 | -1.77 | -0.82 | 9.9E-12 |
| Dusp10  | 751   | 1.47  | 0.55  | 2.4E-06 | 1.39  | 0.48  | 5.5E-05 |
| Dusp14  | 524   | 1.97  | 0.98  | 6.0E-14 | 2.02  | 1.01  | 8.1E-15 |
| Dusp15  | 477   | 2.05  | 1.03  | 1.4E-05 | 2.24  | 1.16  | 9.4E-07 |
| Dusp22  | 1088  | -1.40 | -0.49 | 5.1E-09 | -1.29 | -0.37 | 1.5E-05 |
| Dusp23  | 361   | 2.06  | 1.04  | 8.3E-19 | 2.10  | 1.07  | 7.5E-20 |
| Dusp27  | 234   | -2.23 | -1.15 | 1.3E-04 | -2.54 | -1.35 | 6.9E-06 |
| Dusp28  | 458   | 1.52  | 0.60  | 2.1E-08 | 1.45  | 0.54  | 7.5E-07 |
| Dusp3   | 1149  | -1.29 | -0.37 | 1.1E-05 | -1.28 | -0.36 | 2.1E-05 |
| Dusp5   | 207   | 3.15  | 1.65  | 2.6E-17 | 2.63  | 1.39  | 1.3E-12 |
| Duxbl1  | 200   | -3.71 | -1.89 | 7.7E-19 | -4.26 | -2.09 | 2.1E-22 |
| Dvl1    | 5782  | 1.40  | 0.48  | 2.0E-06 | 1.32  | 0.40  | 9.8E-05 |
| Dvl2    | 4139  | 1.46  | 0.55  | 6.6E-06 | 1.35  | 0.43  | 4.4E-04 |
| Dym     | 1916  | 1.28  | 0.36  | 1.1E-08 | 1.18  | 0.24  | 1.9E-04 |
| DynII1  | 18125 | 1.46  | 0.55  | 6.3E-11 | 1.41  | 0.49  | 5.2E-09 |
| DynII2  | 41071 | 1.50  | 0.59  | 1.2E-03 | 1.36  | 0.44  | 1.8E-02 |
| Dynlt1f | 2100  | -1.60 | -0.68 | 1.2E-17 | -1.62 | -0.69 | 3.5E-18 |
| Dyrk1a  | 7472  | -1.44 | -0.52 | 2.6E-08 | -1.54 | -0.62 | 2.1E-11 |
| Dyrk1b  | 1249  | -2.21 | -1.14 | 3.1E-12 | -2.12 | -1.09 | 3.7E-11 |
| Dyrk3   | 1300  | 1.38  | 0.47  | 1.7E-04 | 1.33  | 0.42  | 1.0E-03 |
| Dzank1  | 2463  | 1.87  | 0.90  | 5.0E-08 | 2.02  | 1.02  | 6.4E-10 |
| Dzip1I  | 2016  | -1.26 | -0.33 | 5.5E-05 | -1.22 | -0.28 | 6.3E-04 |

|               |       |       |       |         |       |       |         |
|---------------|-------|-------|-------|---------|-------|-------|---------|
| E130114P18Rik | 1187  | -2.86 | -1.52 | 1.5E-18 | -2.71 | -1.44 | 1.0E-16 |
| E130311K13Rik | 149   | -2.95 | -1.56 | 4.8E-23 | -2.42 | -1.28 | 9.7E-16 |
| E4f1          | 2294  | -1.24 | -0.31 | 1.3E-02 | -1.30 | -0.37 | 2.9E-03 |
| Eaf2          | 184   | 3.27  | 1.71  | 1.0E-22 | 2.80  | 1.48  | 2.2E-17 |
| Eapp          | 2895  | -1.47 | -0.55 | 3.6E-12 | -1.48 | -0.57 | 1.1E-12 |
| Ears2         | 1104  | -1.37 | -0.46 | 1.6E-08 | -1.36 | -0.45 | 4.7E-08 |
| Ebf1          | 6893  | -1.54 | -0.62 | 6.9E-05 | -1.34 | -0.42 | 9.0E-03 |
| Ebf3          | 12814 | -1.68 | -0.75 | 2.6E-04 | -1.60 | -0.68 | 1.1E-03 |
| Ebpl          | 917   | -1.78 | -0.83 | 2.6E-56 | -1.96 | -0.97 | 8.2E-75 |
| Ecd           | 3036  | -2.25 | -1.17 | 3.7E-66 | -2.43 | -1.28 | 9.2E-79 |
| Ece1          | 4433  | 1.48  | 0.56  | 1.7E-07 | 1.41  | 0.50  | 4.5E-06 |
| Ech1          | 1513  | -1.73 | -0.79 | 1.0E-10 | -1.72 | -0.78 | 2.2E-10 |
| Echdc2        | 513   | -1.29 | -0.37 | 1.0E-02 | -1.34 | -0.42 | 3.9E-03 |
| Echs1         | 4538  | -1.19 | -0.25 | 3.1E-03 | -1.25 | -0.33 | 8.1E-05 |
| Eci1          | 764   | -1.64 | -0.72 | 5.1E-11 | -1.90 | -0.93 | 1.4E-17 |
| Ecpas         | 9645  | -1.62 | -0.70 | 2.0E-10 | -1.50 | -0.58 | 1.6E-07 |
| Ecscr         | 463   | -1.77 | -0.82 | 8.0E-15 | -1.77 | -0.82 | 8.7E-15 |
| Eda           | 935   | 1.60  | 0.68  | 9.6E-10 | 1.54  | 0.63  | 2.4E-08 |
| Eda2r         | 381   | 2.03  | 1.02  | 1.5E-18 | 2.07  | 1.05  | 1.4E-19 |
| Edaradd       | 238   | -1.78 | -0.83 | 4.3E-05 | -1.87 | -0.90 | 1.1E-05 |
| Edem1         | 3750  | 1.35  | 0.43  | 6.5E-11 | 1.31  | 0.39  | 3.9E-09 |
| Edem3         | 10282 | 1.57  | 0.65  | 9.5E-11 | 1.72  | 0.78  | 3.4E-15 |
| Edn3          | 547   | -2.36 | -1.24 | 1.4E-10 | -2.12 | -1.08 | 2.8E-08 |
| Ednra         | 1262  | -2.67 | -1.42 | 8.0E-05 | -2.60 | -1.38 | 1.4E-04 |
| Ednrb         | 7012  | -2.12 | -1.09 | 3.8E-15 | -1.87 | -0.90 | 8.9E-11 |
| Edrf1         | 4278  | 1.29  | 0.37  | 1.1E-05 | 1.35  | 0.43  | 2.4E-07 |
| Eea1          | 5899  | 1.27  | 0.34  | 3.7E-03 | 1.46  | 0.55  | 2.1E-06 |
| Eef1akmt2     | 1990  | -1.47 | -0.55 | 1.8E-06 | -1.44 | -0.53 | 5.8E-06 |
| Eef1akmt4     | 244   | 1.80  | 0.85  | 1.7E-07 | 1.60  | 0.68  | 3.8E-05 |
| Eef1d         | 11624 | 1.35  | 0.44  | 7.9E-05 | 1.25  | 0.33  | 3.9E-03 |
| Eef1e1        | 2925  | -1.34 | -0.42 | 7.1E-07 | -1.27 | -0.34 | 6.7E-05 |
| Eef2k         | 3029  | -1.43 | -0.52 | 4.0E-10 | -1.50 | -0.58 | 1.4E-12 |
| Eepd1         | 753   | 1.91  | 0.94  | 1.6E-11 | 1.93  | 0.95  | 8.0E-12 |
| Efcab14       | 4204  | 1.31  | 0.39  | 3.9E-08 | 1.32  | 0.41  | 1.2E-08 |
| Efcab2        | 998   | -1.67 | -0.74 | 3.2E-18 | -1.53 | -0.61 | 1.4E-12 |
| Efcab5        | 152   | -1.85 | -0.89 | 6.5E-05 | -1.73 | -0.79 | 4.6E-04 |
| Efcab6        | 111   | 2.66  | 1.41  | 7.2E-09 | 2.66  | 1.41  | 6.8E-09 |
| Efhb          | 184   | 1.75  | 0.81  | 1.8E-07 | 1.77  | 0.82  | 1.5E-07 |
| Efhd1         | 206   | 3.86  | 1.95  | 8.1E-44 | 3.21  | 1.68  | 2.5E-33 |
| Efl1          | 1990  | 1.38  | 0.46  | 2.0E-08 | 1.37  | 0.46  | 3.6E-08 |
| Efna3         | 1500  | 2.61  | 1.38  | 1.2E-19 | 2.86  | 1.51  | 3.1E-23 |
| Efna5         | 4440  | -1.71 | -0.78 | 9.9E-07 | -1.90 | -0.92 | 4.3E-09 |
| Efr3a         | 5605  | 1.74  | 0.80  | 1.0E-15 | 1.91  | 0.94  | 5.7E-21 |
| Efs           | 1843  | -3.12 | -1.64 | 6.1E-42 | -3.18 | -1.67 | 4.0E-43 |
| Egfl6         | 1461  | -2.63 | -1.40 | 6.5E-03 | -2.18 | -1.13 | 3.2E-02 |
| Egfl7         | 1234  | -1.34 | -0.42 | 4.1E-04 | -1.43 | -0.52 | 1.1E-05 |
| Egflam        | 1500  | -1.66 | -0.73 | 2.2E-03 | -1.70 | -0.77 | 1.4E-03 |

|          |        |        |       |         |        |       |         |
|----------|--------|--------|-------|---------|--------|-------|---------|
| Egfr     | 1567   | -1.89  | -0.92 | 1.1E-02 | -1.69  | -0.76 | 3.9E-02 |
| Egln2    | 3902   | -1.51  | -0.59 | 7.8E-10 | -1.59  | -0.67 | 2.3E-12 |
| Egln3    | 1020   | 2.18   | 1.13  | 4.0E-23 | 2.35   | 1.23  | 2.3E-27 |
| Egr1     | 400    | 1.74   | 0.80  | 2.8E-04 | 1.71   | 0.77  | 4.8E-04 |
| Ehd2     | 1794   | -1.51  | -0.59 | 1.2E-02 | -1.49  | -0.58 | 1.6E-02 |
| Ehd3     | 1653   | 1.41   | 0.50  | 1.8E-08 | 1.38   | 0.47  | 1.4E-07 |
| Ehd4     | 1799   | 1.95   | 0.96  | 1.5E-07 | 1.79   | 0.84  | 5.0E-06 |
| Ehhadh   | 313    | 1.60   | 0.68  | 1.1E-03 | 1.58   | 0.66  | 1.6E-03 |
| Ehmt1    | 11001  | -1.32  | -0.40 | 3.2E-07 | -1.44  | -0.53 | 5.5E-12 |
| Ei24     | 10552  | 1.34   | 0.42  | 4.3E-12 | 1.30   | 0.38  | 5.6E-10 |
| Eif1     | 19564  | -1.35  | -0.44 | 1.9E-05 | -1.47  | -0.56 | 3.8E-08 |
| Eif1a    | 6290   | 1.38   | 0.46  | 4.7E-05 | 1.38   | 0.47  | 3.8E-05 |
| Eif1b    | 5344   | -1.24  | -0.32 | 2.6E-02 | -1.33  | -0.41 | 3.4E-03 |
| Eif2a    | 5182   | -1.26  | -0.33 | 8.3E-04 | -1.19  | -0.25 | 1.4E-02 |
| Eif2ak1  | 6552   | 1.40   | 0.49  | 1.8E-14 | 1.37   | 0.45  | 2.3E-12 |
| Eif2ak3  | 3360   | 1.66   | 0.74  | 1.2E-36 | 1.64   | 0.72  | 9.9E-35 |
| Eif2ak4  | 3967   | 1.65   | 0.73  | 3.6E-28 | 1.76   | 0.82  | 1.6E-35 |
| Eif2b2   | 3102   | 1.34   | 0.42  | 6.5E-08 | 1.19   | 0.25  | 2.5E-03 |
| Eif2d    | 2628   | -1.32  | -0.40 | 1.4E-10 | -1.36  | -0.45 | 9.0E-13 |
| Eif3b    | 17521  | 1.30   | 0.38  | 5.4E-06 | 1.20   | 0.26  | 2.3E-03 |
| Eif4a1   | 54504  | -1.46  | -0.54 | 2.9E-08 | -1.54  | -0.62 | 1.4E-10 |
| Eif4a2   | 34220  | -1.54  | -0.63 | 2.4E-11 | -1.41  | -0.50 | 1.5E-07 |
| Eif4b    | 28381  | -1.25  | -0.33 | 3.4E-13 | -1.27  | -0.34 | 2.5E-14 |
| Eif4ebp1 | 706    | 1.61   | 0.69  | 2.7E-03 | 1.45   | 0.54  | 2.1E-02 |
| Eif4ebp2 | 26725  | 1.59   | 0.67  | 4.9E-06 | 1.41   | 0.50  | 9.0E-04 |
| Eif4g2   | 151975 | -1.58  | -0.66 | 2.1E-18 | -1.59  | -0.67 | 1.8E-18 |
| Eif5     | 26189  | -1.47  | -0.56 | 6.0E-10 | -1.55  | -0.63 | 2.3E-12 |
| Eif5a2   | 3776   | 2.20   | 1.13  | 2.3E-26 | 2.41   | 1.27  | 1.2E-32 |
| Eif5b    | 19023  | 1.30   | 0.38  | 4.0E-06 | 1.27   | 0.35  | 3.3E-05 |
| Eif6     | 5069   | 1.57   | 0.65  | 4.5E-11 | 1.43   | 0.52  | 1.9E-07 |
| Elac1    | 1298   | -1.29  | -0.36 | 1.5E-08 | -1.27  | -0.34 | 1.1E-07 |
| Elac2    | 3479   | 1.44   | 0.53  | 4.5E-12 | 1.32   | 0.40  | 2.5E-07 |
| Elavl4   | 13824  | -1.58  | -0.66 | 1.1E-05 | -1.45  | -0.54 | 4.3E-04 |
| Elf1     | 1314   | -1.54  | -0.63 | 5.5E-14 | -1.64  | -0.72 | 6.2E-18 |
| Elf4     | 973    | 1.37   | 0.46  | 1.9E-02 | 1.31   | 0.39  | 4.7E-02 |
| Elf5     | 101    | -10.13 | -3.34 | 1.0E-02 | -14.82 | -3.89 | 2.8E-03 |
| Elk1     | 4408   | 1.40   | 0.49  | 8.7E-06 | 1.47   | 0.56  | 3.7E-07 |
| Elk3     | 2200   | -1.68  | -0.75 | 6.9E-07 | -1.60  | -0.68 | 8.7E-06 |
| ElI2     | 1029   | 2.67   | 1.42  | 6.1E-20 | 2.67   | 1.42  | 5.9E-20 |
| Elmo2    | 11087  | 1.89   | 0.92  | 1.1E-50 | 1.89   | 0.92  | 8.8E-51 |
| Elmod3   | 1141   | 1.49   | 0.58  | 4.7E-17 | 1.56   | 0.64  | 1.3E-20 |
| Eln      | 1922   | -3.09  | -1.63 | 5.3E-04 | -2.83  | -1.50 | 1.5E-03 |
| Eloa     | 5844   | 1.39   | 0.48  | 1.4E-07 | 1.36   | 0.44  | 1.4E-06 |
| Elovl4   | 3897   | 1.60   | 0.68  | 3.2E-13 | 1.64   | 0.71  | 1.7E-14 |
| Elovl5   | 8373   | 2.20   | 1.14  | 1.2E-38 | 2.13   | 1.09  | 9.9E-36 |
| Elovl7   | 200    | 2.09   | 1.06  | 3.7E-07 | 2.02   | 1.01  | 1.6E-06 |
| Elp3     | 7801   | -1.30  | -0.38 | 2.7E-17 | -1.35  | -0.43 | 4.6E-22 |

|         |       |       |       |         |       |       |         |
|---------|-------|-------|-------|---------|-------|-------|---------|
| Elp5    | 5319  | 1.51  | 0.60  | 8.5E-18 | 1.50  | 0.58  | 6.3E-17 |
| Elp6    | 1035  | -3.00 | -1.59 | 1.0E-81 | -3.22 | -1.69 | 7.7E-92 |
| Emc10   | 3890  | -1.48 | -0.56 | 2.3E-12 | -1.58 | -0.66 | 1.0E-16 |
| Emc2    | 3514  | 1.29  | 0.36  | 6.1E-05 | 1.29  | 0.37  | 4.7E-05 |
| Emc8    | 5610  | 1.60  | 0.68  | 5.8E-17 | 1.50  | 0.58  | 9.8E-13 |
| Emc9    | 270   | 1.54  | 0.63  | 8.8E-05 | 1.55  | 0.63  | 8.0E-05 |
| Emcn    | 748   | -2.03 | -1.02 | 2.7E-06 | -2.03 | -1.02 | 2.8E-06 |
| Eme1    | 1560  | -1.42 | -0.51 | 3.2E-02 | -1.63 | -0.71 | 2.2E-03 |
| Emilin1 | 4377  | -2.01 | -1.01 | 1.7E-02 | -2.20 | -1.13 | 7.0E-03 |
| Emilin3 | 724   | -1.78 | -0.83 | 1.6E-02 | -1.70 | -0.77 | 2.8E-02 |
| Eml2    | 2644  | 1.77  | 0.82  | 1.3E-09 | 1.64  | 0.71  | 1.8E-07 |
| Eml3    | 2022  | 1.27  | 0.34  | 1.2E-03 | 1.22  | 0.28  | 8.9E-03 |
| Eml4    | 15217 | 1.40  | 0.49  | 2.8E-17 | 1.48  | 0.57  | 2.3E-23 |
| Eml5    | 16668 | 1.95  | 0.97  | 7.4E-08 | 2.10  | 1.07  | 2.0E-09 |
| Emp1    | 4540  | -3.07 | -1.62 | 4.5E-08 | -2.63 | -1.39 | 3.0E-06 |
| Emp2    | 457   | -1.49 | -0.57 | 4.9E-02 | -1.62 | -0.70 | 1.6E-02 |
| Emp3    | 587   | -1.83 | -0.87 | 2.6E-04 | -1.74 | -0.80 | 8.3E-04 |
| Enah    | 27791 | -1.27 | -0.35 | 5.4E-05 | -1.31 | -0.39 | 7.1E-06 |
| Endod1  | 886   | -1.92 | -0.94 | 4.3E-12 | -1.92 | -0.94 | 5.9E-12 |
| Endog   | 173   | -1.42 | -0.51 | 2.5E-05 | -1.50 | -0.58 | 1.1E-06 |
| Endov   | 3296  | -1.36 | -0.44 | 4.5E-06 | -1.43 | -0.52 | 7.6E-08 |
| Eng     | 1751  | -1.31 | -0.39 | 1.5E-02 | -1.40 | -0.49 | 2.3E-03 |
| Engase  | 898   | 2.13  | 1.09  | 2.2E-20 | 2.01  | 1.00  | 1.7E-17 |
| Enho    | 1731  | -1.53 | -0.61 | 3.6E-06 | -1.39 | -0.48 | 3.8E-04 |
| Enkd1   | 1285  | 1.61  | 0.68  | 3.6E-05 | 1.42  | 0.50  | 3.1E-03 |
| Eno1    | 41339 | 1.30  | 0.38  | 1.9E-03 | 1.23  | 0.30  | 1.7E-02 |
| Eno1b   | 1567  | 1.33  | 0.41  | 1.1E-03 | 1.30  | 0.38  | 2.9E-03 |
| Eno2    | 2586  | 2.76  | 1.46  | 2.9E-16 | 2.82  | 1.49  | 7.1E-17 |
| Enoph1  | 2270  | 1.73  | 0.79  | 8.1E-29 | 1.64  | 0.71  | 8.5E-24 |
| Enox2   | 1188  | -1.37 | -0.45 | 2.7E-05 | -1.27 | -0.35 | 1.5E-03 |
| Enpep   | 313   | -2.79 | -1.48 | 1.9E-04 | -2.55 | -1.35 | 7.4E-04 |
| Enpp4   | 875   | 1.33  | 0.41  | 6.2E-09 | 1.42  | 0.50  | 1.0E-12 |
| Ensa    | 9994  | -1.46 | -0.54 | 5.2E-26 | -1.49 | -0.57 | 9.7E-29 |
| Entpd1  | 1019  | -2.00 | -1.00 | 3.6E-33 | -1.92 | -0.94 | 3.2E-29 |
| Entpd5  | 2041  | 1.41  | 0.49  | 1.2E-08 | 1.44  | 0.52  | 1.1E-09 |
| Entpd6  | 2345  | 1.30  | 0.38  | 4.7E-06 | 1.32  | 0.40  | 1.4E-06 |
| Entpd7  | 1194  | 1.48  | 0.57  | 1.8E-06 | 1.32  | 0.40  | 9.3E-04 |
| Eola1   | 1192  | 1.38  | 0.46  | 2.3E-08 | 1.39  | 0.47  | 1.2E-08 |
| Eomes   | 3938  | -1.81 | -0.85 | 1.6E-02 | -1.86 | -0.89 | 1.1E-02 |
| Ep300   | 10587 | -1.39 | -0.48 | 1.2E-05 | -1.31 | -0.39 | 4.0E-04 |
| Epb41l1 | 5748  | -2.00 | -1.00 | 4.9E-09 | -2.08 | -1.06 | 6.4E-10 |
| Epb41l2 | 9234  | 1.33  | 0.42  | 6.0E-04 | 1.40  | 0.49  | 4.6E-05 |
| Epb41l3 | 7883  | -1.36 | -0.45 | 1.8E-05 | -1.26 | -0.33 | 1.7E-03 |
| Epb41l5 | 5238  | 1.94  | 0.96  | 4.1E-16 | 1.84  | 0.88  | 9.9E-14 |
| Epc1    | 5451  | -1.97 | -0.98 | 1.6E-20 | -2.09 | -1.06 | 3.7E-24 |
| Epc2    | 5022  | -3.53 | -1.82 | 7.0E-57 | -3.45 | -1.79 | 8.2E-55 |
| Epdr1   | 1016  | -1.45 | -0.54 | 5.7E-09 | -1.55 | -0.63 | 4.6E-12 |

|         |       |       |       |         |       |       |         |
|---------|-------|-------|-------|---------|-------|-------|---------|
| Epha10  | 2594  | 2.50  | 1.32  | 1.6E-07 | 2.58  | 1.37  | 5.6E-08 |
| Epha2   | 858   | 2.11  | 1.07  | 4.7E-07 | 2.00  | 1.00  | 3.2E-06 |
| Epha8   | 1177  | 1.69  | 0.75  | 3.5E-03 | 1.46  | 0.54  | 4.1E-02 |
| Ephb2   | 25546 | 1.44  | 0.52  | 1.4E-03 | 1.29  | 0.37  | 2.8E-02 |
| Ephb6   | 1846  | -1.44 | -0.53 | 6.5E-04 | -1.56 | -0.64 | 2.8E-05 |
| Ephx1   | 339   | 2.87  | 1.52  | 4.9E-08 | 3.13  | 1.64  | 3.6E-09 |
| Epm2a   | 334   | -3.79 | -1.92 | 1.3E-36 | -3.98 | -1.99 | 4.4E-39 |
| Epop    | 1631  | 3.78  | 1.92  | 8.7E-28 | 3.08  | 1.62  | 3.6E-20 |
| Epor    | 184   | 2.54  | 1.35  | 4.0E-12 | 2.64  | 1.40  | 6.6E-13 |
| Eprs    | 22041 | 1.32  | 0.40  | 6.4E-07 | 1.40  | 0.48  | 1.3E-09 |
| Eps8    | 1184  | 1.27  | 0.35  | 3.0E-02 | 1.32  | 0.40  | 1.2E-02 |
| Epyc    | 353   | -2.80 | -1.48 | 5.5E-03 | -2.61 | -1.39 | 1.0E-02 |
| Eral1   | 1356  | -1.39 | -0.48 | 1.6E-15 | -1.49 | -0.58 | 2.5E-22 |
| Erap1   | 425   | -1.99 | -0.99 | 4.2E-10 | -2.11 | -1.07 | 1.2E-11 |
| Erbin   | 14418 | -2.02 | -1.02 | 2.6E-26 | -1.88 | -0.91 | 3.6E-21 |
| Erc1    | 11179 | 1.36  | 0.45  | 1.9E-03 | 1.50  | 0.58  | 4.0E-05 |
| Erc2    | 5173  | 1.59  | 0.66  | 2.0E-11 | 1.47  | 0.55  | 3.4E-08 |
| Erc3    | 2601  | -1.21 | -0.27 | 9.5E-05 | -1.27 | -0.35 | 3.8E-07 |
| Erc6    | 3104  | -2.05 | -1.04 | 3.7E-45 | -1.92 | -0.94 | 3.0E-37 |
| Erc6l2  | 2908  | -1.79 | -0.84 | 1.2E-15 | -1.69 | -0.76 | 7.3E-13 |
| Erc8    | 1754  | 1.30  | 0.38  | 3.6E-05 | 1.31  | 0.39  | 2.8E-05 |
| Erg     | 1097  | -2.37 | -1.25 | 4.0E-09 | -2.44 | -1.29 | 1.2E-09 |
| Ergic2  | 6972  | -1.39 | -0.48 | 2.8E-08 | -1.35 | -0.44 | 5.2E-07 |
| Eri1    | 5184  | 1.54  | 0.62  | 2.7E-21 | 1.57  | 0.65  | 2.7E-23 |
| Eri2    | 3184  | -1.51 | -0.59 | 1.1E-10 | -1.50 | -0.59 | 2.0E-10 |
| Erich1  | 884   | 1.67  | 0.74  | 2.2E-21 | 1.57  | 0.65  | 8.7E-17 |
| Erich2  | 208   | 2.30  | 1.20  | 8.8E-19 | 2.12  | 1.08  | 1.9E-15 |
| Erich3  | 262   | -1.67 | -0.74 | 2.2E-04 | -1.38 | -0.46 | 2.5E-02 |
| Erlec1  | 2417  | -1.50 | -0.58 | 4.2E-08 | -1.39 | -0.47 | 1.0E-05 |
| Erlin1  | 2755  | 1.27  | 0.35  | 4.8E-07 | 1.25  | 0.32  | 4.4E-06 |
| Ermap   | 432   | -2.82 | -1.49 | 8.0E-03 | -3.09 | -1.63 | 3.9E-03 |
| Ermard  | 630   | -2.02 | -1.01 | 6.6E-38 | -1.85 | -0.89 | 3.0E-29 |
| Ern1    | 3334  | 2.07  | 1.05  | 2.2E-28 | 2.16  | 1.11  | 6.6E-32 |
| Ero1a   | 4175  | 1.46  | 0.54  | 3.8E-11 | 1.51  | 0.60  | 3.3E-13 |
| Ero1b   | 1506  | 2.60  | 1.38  | 2.1E-44 | 2.60  | 1.38  | 2.3E-44 |
| Erp44   | 4425  | 1.39  | 0.48  | 2.3E-16 | 1.39  | 0.47  | 5.7E-16 |
| Esam    | 977   | -1.91 | -0.94 | 8.4E-27 | -2.07 | -1.05 | 3.2E-33 |
| Esd     | 8994  | 1.36  | 0.45  | 6.3E-06 | 1.31  | 0.39  | 8.5E-05 |
| Esf1    | 5083  | 1.29  | 0.36  | 8.6E-04 | 1.25  | 0.32  | 3.3E-03 |
| Esrp2   | 159   | -2.97 | -1.57 | 2.7E-02 | -3.92 | -1.97 | 5.0E-03 |
| Esrrg   | 3114  | 1.54  | 0.62  | 8.5E-03 | 1.67  | 0.74  | 1.6E-03 |
| Esyt1   | 4184  | 1.68  | 0.75  | 3.1E-07 | 1.63  | 0.70  | 1.5E-06 |
| Esyt2   | 5362  | 1.23  | 0.30  | 2.3E-04 | 1.31  | 0.39  | 1.5E-06 |
| Esyt3   | 111   | 5.12  | 2.36  | 8.5E-21 | 6.66  | 2.74  | 3.8E-26 |
| Etf1    | 14961 | 1.27  | 0.35  | 2.4E-04 | 1.23  | 0.30  | 1.9E-03 |
| Etfa    | 4000  | 1.28  | 0.36  | 1.6E-03 | 1.21  | 0.28  | 1.7E-02 |
| Etfbkmt | 315   | -1.43 | -0.52 | 2.2E-04 | -1.51 | -0.59 | 2.1E-05 |



|          |       |       |       |          |       |       |          |
|----------|-------|-------|-------|----------|-------|-------|----------|
| Etfdh    | 4623  | 1.64  | 0.71  | 1.1E-27  | 1.66  | 0.73  | 3.6E-29  |
| Etfrf1   | 1202  | -1.35 | -0.44 | 2.0E-05  | -1.31 | -0.38 | 2.2E-04  |
| Ethe1    | 687   | 2.65  | 1.41  | 3.5E-40  | 2.51  | 1.33  | 6.9E-36  |
| Etl4     | 2994  | -1.90 | -0.92 | 8.4E-15  | -1.81 | -0.86 | 6.8E-13  |
| Etnk1    | 20437 | 1.43  | 0.52  | 5.8E-06  | 1.64  | 0.72  | 2.6E-10  |
| Etnk2    | 538   | 3.78  | 1.92  | 2.7E-42  | 3.47  | 1.79  | 5.1E-37  |
| Ets2     | 2942  | -1.45 | -0.54 | 8.6E-03  | -1.42 | -0.50 | 1.5E-02  |
| Etv4     | 452   | -1.41 | -0.49 | 2.5E-02  | -1.36 | -0.45 | 4.7E-02  |
| Eva1b    | 400   | -1.75 | -0.80 | 2.5E-03  | -1.82 | -0.86 | 1.2E-03  |
| Evc2     | 1346  | -1.48 | -0.57 | 1.7E-05  | -1.63 | -0.71 | 7.2E-08  |
| Evi5l    | 7872  | 1.50  | 0.58  | 5.0E-06  | 1.45  | 0.53  | 3.6E-05  |
| Ewsr1    | 37253 | -1.31 | -0.39 | 2.3E-11  | -1.36 | -0.45 | 1.4E-14  |
| Exd1     | 115   | 1.77  | 0.82  | 3.0E-06  | 1.83  | 0.87  | 1.0E-06  |
| Exoc3    | 8530  | -1.26 | -0.33 | 7.8E-06  | -1.23 | -0.30 | 4.7E-05  |
| Exoc3l2  | 133   | -1.70 | -0.77 | 3.9E-04  | -1.70 | -0.76 | 4.4E-04  |
| Exoc6    | 1031  | -1.67 | -0.74 | 5.4E-12  | -1.60 | -0.68 | 2.1E-10  |
| Exosc10  | 4863  | -2.34 | -1.23 | 1.6E-128 | -2.43 | -1.28 | 5.7E-139 |
| Exosc7   | 1863  | -1.31 | -0.39 | 5.0E-04  | -1.40 | -0.49 | 7.8E-06  |
| Exosc8   | 3595  | -1.28 | -0.36 | 8.1E-04  | -1.29 | -0.36 | 7.1E-04  |
| Exosc9   | 4861  | 1.27  | 0.35  | 3.1E-03  | 1.25  | 0.32  | 6.2E-03  |
| Ext1     | 5543  | 1.28  | 0.35  | 3.9E-04  | 1.29  | 0.37  | 2.6E-04  |
| Extl1    | 449   | 5.64  | 2.50  | 1.8E-16  | 5.82  | 2.54  | 5.8E-17  |
| Extl2    | 2463  | 1.65  | 0.72  | 1.1E-25  | 1.76  | 0.81  | 4.8E-32  |
| Eya1     | 1127  | -2.29 | -1.19 | 9.7E-07  | -2.10 | -1.07 | 1.4E-05  |
| Eya3     | 5720  | 1.27  | 0.34  | 1.4E-05  | 1.27  | 0.34  | 1.5E-05  |
| Eya4     | 1779  | -2.09 | -1.06 | 3.7E-05  | -1.89 | -0.92 | 4.2E-04  |
| Ezr      | 9712  | 1.47  | 0.55  | 1.6E-07  | 1.39  | 0.48  | 7.4E-06  |
| F13a1    | 1708  | -1.39 | -0.47 | 1.5E-02  | -1.40 | -0.48 | 1.4E-02  |
| F2rl1    | 139   | 2.31  | 1.21  | 2.3E-02  | 2.17  | 1.12  | 3.9E-02  |
| F8       | 193   | -2.40 | -1.26 | 6.2E-07  | -2.06 | -1.04 | 5.3E-05  |
| Faap20   | 1527  | -1.54 | -0.62 | 3.1E-12  | -1.70 | -0.77 | 6.6E-18  |
| Fabp5    | 12171 | -1.45 | -0.54 | 1.2E-07  | -1.46 | -0.55 | 7.7E-08  |
| Fabp7    | 24237 | -1.40 | -0.48 | 5.0E-04  | -1.29 | -0.37 | 9.7E-03  |
| Fads2    | 13692 | -1.50 | -0.59 | 1.0E-07  | -1.76 | -0.81 | 9.2E-14  |
| Faf2     | 5627  | -1.25 | -0.33 | 2.0E-15  | -1.30 | -0.37 | 5.1E-20  |
| Fahd1    | 725   | -1.41 | -0.49 | 4.7E-07  | -1.41 | -0.49 | 5.4E-07  |
| Fahd2a   | 715   | -1.25 | -0.33 | 7.8E-06  | -1.29 | -0.37 | 4.5E-07  |
| Faim     | 2662  | 1.46  | 0.55  | 2.4E-15  | 1.42  | 0.51  | 2.3E-13  |
| Fam102a  | 2258  | 1.52  | 0.60  | 4.3E-08  | 1.50  | 0.59  | 1.1E-07  |
| Fam102b  | 6586  | 1.45  | 0.54  | 9.7E-06  | 1.53  | 0.61  | 4.5E-07  |
| Fam104a  | 2897  | 1.50  | 0.58  | 4.5E-20  | 1.38  | 0.47  | 3.1E-13  |
| Fam107a  | 219   | -3.39 | -1.76 | 9.2E-05  | -3.53 | -1.82 | 5.4E-05  |
| Fam107b  | 6022  | 1.35  | 0.43  | 1.1E-11  | 1.32  | 0.40  | 2.1E-10  |
| Fam111a  | 4379  | 1.55  | 0.63  | 3.7E-05  | 1.57  | 0.65  | 2.1E-05  |
| Fam114a1 | 1545  | -1.70 | -0.77 | 8.8E-03  | -1.75 | -0.81 | 5.9E-03  |
| Fam117a  | 1339  | 2.73  | 1.45  | 1.9E-13  | 2.69  | 1.43  | 5.3E-13  |
| Fam117b  | 9506  | 1.31  | 0.39  | 2.2E-02  | 1.29  | 0.36  | 3.3E-02  |

|          |       |       |       |          |       |       |          |
|----------|-------|-------|-------|----------|-------|-------|----------|
| Fam118a  | 1972  | 1.58  | 0.66  | 5.0E-20  | 1.50  | 0.58  | 1.2E-15  |
| Fam118b  | 3527  | 1.41  | 0.50  | 9.7E-09  | 1.39  | 0.48  | 4.0E-08  |
| Fam120b  | 6222  | 1.22  | 0.29  | 2.6E-04  | 1.27  | 0.35  | 1.0E-05  |
| Fam122b  | 1710  | 1.50  | 0.58  | 1.1E-09  | 1.54  | 0.62  | 7.4E-11  |
| Fam126a  | 12417 | 1.68  | 0.75  | 6.5E-18  | 1.82  | 0.87  | 8.3E-24  |
| Fam131b  | 3839  | 1.27  | 0.35  | 5.7E-03  | 1.22  | 0.29  | 2.5E-02  |
| Fam131c  | 183   | 2.05  | 1.04  | 2.2E-04  | 1.65  | 0.72  | 1.2E-02  |
| Fam135a  | 9395  | 1.28  | 0.36  | 1.9E-03  | 1.44  | 0.52  | 3.3E-06  |
| Fam13a   | 1152  | 1.86  | 0.90  | 2.3E-20  | 1.91  | 0.93  | 1.0E-21  |
| Fam13c   | 1917  | -1.61 | -0.69 | 2.4E-11  | -1.62 | -0.70 | 1.2E-11  |
| Fam149a  | 829   | -1.62 | -0.70 | 7.9E-08  | -1.56 | -0.64 | 9.6E-07  |
| Fam149b  | 3470  | -1.58 | -0.66 | 2.8E-35  | -1.60 | -0.68 | 1.5E-36  |
| Fam151b  | 114   | -2.12 | -1.09 | 1.3E-09  | -2.20 | -1.14 | 1.9E-10  |
| Fam160a1 | 194   | 2.05  | 1.03  | 1.6E-02  | 2.65  | 1.41  | 8.8E-04  |
| Fam160a2 | 6107  | 1.38  | 0.46  | 1.3E-09  | 1.40  | 0.48  | 3.1E-10  |
| Fam161a  | 329   | -1.46 | -0.55 | 1.7E-05  | -1.36 | -0.44 | 6.9E-04  |
| Fam161b  | 1588  | 1.36  | 0.44  | 2.3E-07  | 1.36  | 0.44  | 2.0E-07  |
| Fam163a  | 413   | -1.86 | -0.89 | 2.4E-04  | -1.93 | -0.95 | 9.2E-05  |
| Fam168a  | 15927 | -1.28 | -0.35 | 1.5E-02  | -1.23 | -0.30 | 4.5E-02  |
| Fam168b  | 28932 | -1.47 | -0.55 | 2.2E-09  | -1.54 | -0.62 | 1.6E-11  |
| Fam169a  | 2275  | -1.31 | -0.39 | 7.2E-03  | -1.29 | -0.36 | 1.4E-02  |
| Fam171a1 | 4578  | -1.95 | -0.96 | 2.3E-29  | -1.99 | -0.99 | 3.4E-31  |
| Fam171a2 | 4922  | -1.31 | -0.39 | 3.7E-03  | -1.35 | -0.44 | 9.8E-04  |
| Fam174b  | 1868  | -1.51 | -0.59 | 8.4E-05  | -1.42 | -0.51 | 9.2E-04  |
| Fam177a2 | 339   | 1.93  | 0.95  | 3.5E-08  | 1.68  | 0.75  | 1.6E-05  |
| Fam184a  | 2615  | 1.67  | 0.74  | 4.7E-13  | 1.89  | 0.92  | 1.3E-19  |
| Fam185a  | 723   | 1.60  | 0.68  | 1.3E-20  | 1.58  | 0.66  | 3.2E-19  |
| Fam189a2 | 598   | 1.65  | 0.72  | 1.2E-05  | 1.66  | 0.73  | 9.5E-06  |
| Fam193a  | 7160  | -1.31 | -0.39 | 3.0E-04  | -1.37 | -0.45 | 3.1E-05  |
| Fam199x  | 3512  | 1.66  | 0.73  | 1.5E-14  | 1.74  | 0.80  | 7.2E-17  |
| Fam204a  | 2660  | -1.47 | -0.56 | 1.5E-08  | -1.38 | -0.46 | 3.5E-06  |
| Fam20a   | 144   | -1.98 | -0.98 | 1.4E-07  | -2.11 | -1.08 | 6.1E-09  |
| Fam210b  | 4597  | 2.98  | 1.58  | 1.3E-37  | 3.08  | 1.62  | 8.7E-40  |
| Fam214a  | 3614  | -1.26 | -0.33 | 3.0E-03  | -1.19 | -0.25 | 3.2E-02  |
| Fam217b  | 976   | 1.60  | 0.68  | 8.8E-04  | 1.76  | 0.82  | 5.6E-05  |
| Fam219a  | 5230  | 1.87  | 0.91  | 5.6E-09  | 1.75  | 0.81  | 2.4E-07  |
| Fam219b  | 1632  | -1.66 | -0.73 | 1.9E-21  | -1.73 | -0.79 | 6.3E-25  |
| Fam221a  | 677   | 3.24  | 1.70  | 1.2E-122 | 3.43  | 1.78  | 9.2E-131 |
| Fam222a  | 973   | 1.71  | 0.77  | 7.3E-05  | 1.41  | 0.50  | 1.3E-02  |
| Fam228a  | 125   | -2.93 | -1.55 | 4.6E-18  | -2.28 | -1.19 | 2.7E-11  |
| Fam228b  | 258   | -3.29 | -1.72 | 8.0E-17  | -2.76 | -1.46 | 1.8E-12  |
| Fam229b  | 532   | -2.07 | -1.05 | 6.8E-20  | -2.05 | -1.04 | 1.6E-19  |
| Fam234a  | 2112  | 1.45  | 0.54  | 1.3E-07  | 1.39  | 0.48  | 3.4E-06  |
| Fam241a  | 671   | 2.62  | 1.39  | 2.3E-28  | 2.96  | 1.57  | 1.3E-35  |
| Fam241b  | 954   | -1.84 | -0.88 | 1.7E-05  | -1.68 | -0.75 | 2.9E-04  |
| Fam32a   | 7381  | -1.33 | -0.41 | 2.3E-08  | -1.27 | -0.35 | 2.2E-06  |
| Fam3a    | 992   | -2.33 | -1.22 | 2.6E-81  | -2.37 | -1.24 | 3.5E-84  |

|        |       |       |       |         |       |       |         |
|--------|-------|-------|-------|---------|-------|-------|---------|
| Fam50a | 3391  | 1.52  | 0.60  | 1.3E-10 | 1.38  | 0.47  | 9.0E-07 |
| Fam53a | 2076  | 1.27  | 0.35  | 7.3E-04 | 1.18  | 0.24  | 2.4E-02 |
| Fam53c | 6809  | 1.59  | 0.67  | 2.6E-19 | 1.39  | 0.47  | 3.7E-10 |
| Fam76a | 2920  | 1.43  | 0.51  | 6.3E-23 | 1.31  | 0.38  | 2.8E-13 |
| Fam78a | 234   | 1.99  | 0.99  | 1.1E-03 | 2.17  | 1.12  | 2.3E-04 |
| Fam81a | 711   | 1.30  | 0.38  | 2.2E-03 | 1.31  | 0.39  | 2.0E-03 |
| Fam83g | 141   | 4.13  | 2.05  | 7.6E-17 | 3.90  | 1.96  | 1.9E-15 |
| Fam83h | 667   | 1.60  | 0.68  | 1.9E-08 | 1.59  | 0.67  | 2.8E-08 |
| Fam98b | 7756  | -1.32 | -0.41 | 2.1E-03 | -1.47 | -0.56 | 1.7E-05 |
| Fam98c | 976   | 2.59  | 1.37  | 4.5E-43 | 2.47  | 1.31  | 5.2E-39 |
| Fanca  | 3134  | 1.64  | 0.71  | 7.8E-06 | 1.63  | 0.71  | 9.9E-06 |
| Fancc  | 1041  | -1.99 | -0.99 | 2.1E-24 | -2.03 | -1.02 | 1.2E-25 |
| Fancd2 | 1668  | -1.85 | -0.89 | 3.7E-07 | -1.79 | -0.84 | 2.0E-06 |
| Fance  | 1589  | 1.35  | 0.43  | 1.5E-07 | 1.27  | 0.34  | 4.0E-05 |
| Fancg  | 1810  | 1.57  | 0.66  | 1.5E-26 | 1.43  | 0.51  | 1.4E-16 |
| Fanci  | 1724  | -1.33 | -0.41 | 4.1E-02 | -1.40 | -0.48 | 1.4E-02 |
| Fancl  | 966   | -1.54 | -0.62 | 1.6E-06 | -1.59 | -0.67 | 2.1E-07 |
| Fancm  | 5418  | 2.10  | 1.07  | 7.9E-16 | 2.27  | 1.18  | 4.3E-19 |
| Fank1  | 216   | 1.71  | 0.77  | 4.6E-08 | 2.03  | 1.02  | 3.6E-13 |
| Fap    | 313   | -3.11 | -1.64 | 2.7E-03 | -2.64 | -1.40 | 1.2E-02 |
| Far1   | 14928 | 1.24  | 0.31  | 1.8E-03 | 1.38  | 0.47  | 1.6E-06 |
| Far2   | 180   | -2.03 | -1.02 | 2.3E-02 | -2.09 | -1.07 | 1.8E-02 |
| Farp1  | 6684  | -1.72 | -0.78 | 5.0E-11 | -1.72 | -0.78 | 7.1E-11 |
| Farp2  | 1216  | 2.44  | 1.29  | 1.7E-10 | 2.99  | 1.58  | 3.7E-15 |
| Fars2  | 691   | -1.61 | -0.68 | 1.2E-15 | -1.65 | -0.73 | 1.4E-17 |
| Fastk  | 3314  | -1.28 | -0.35 | 5.9E-07 | -1.34 | -0.43 | 1.3E-09 |
| Fat2   | 174   | -5.11 | -2.35 | 4.0E-04 | -4.15 | -2.05 | 2.3E-03 |
| Fat4   | 13221 | -1.48 | -0.56 | 1.0E-05 | -1.32 | -0.40 | 2.4E-03 |
| Faxc   | 6099  | -2.28 | -1.19 | 4.8E-12 | -2.08 | -1.05 | 1.1E-09 |
| Fbln7  | 142   | -1.80 | -0.84 | 5.9E-04 | -2.16 | -1.11 | 4.6E-06 |
| Fbxl12 | 1954  | 1.29  | 0.37  | 8.4E-07 | 1.20  | 0.26  | 7.5E-04 |
| Fbxl15 | 588   | 1.28  | 0.36  | 3.5E-04 | 1.20  | 0.26  | 1.2E-02 |
| Fbxl17 | 2918  | -1.41 | -0.50 | 1.1E-05 | -1.37 | -0.45 | 7.3E-05 |
| Fbxl19 | 11669 | -1.45 | -0.53 | 6.8E-05 | -1.52 | -0.60 | 6.1E-06 |
| Fbxl21 | 373   | 3.18  | 1.67  | 2.4E-56 | 3.23  | 1.69  | 2.4E-57 |
| Fbxl22 | 405   | 1.29  | 0.37  | 1.0E-02 | 1.26  | 0.33  | 2.2E-02 |
| Fbxl3  | 4323  | -1.77 | -0.82 | 5.5E-43 | -1.70 | -0.77 | 2.2E-37 |
| Fbxl6  | 2515  | 1.36  | 0.45  | 8.2E-08 | 1.24  | 0.31  | 3.5E-04 |
| Fbxl7  | 1539  | -2.08 | -1.06 | 1.4E-17 | -2.13 | -1.09 | 1.3E-18 |
| Fbxo10 | 3410  | 1.60  | 0.68  | 2.3E-24 | 1.47  | 0.56  | 1.1E-16 |
| Fbxo11 | 13248 | -1.37 | -0.46 | 3.5E-04 | -1.41 | -0.49 | 1.1E-04 |
| Fbxo2  | 214   | 3.52  | 1.81  | 1.3E-13 | 3.87  | 1.95  | 2.1E-15 |
| Fbxo22 | 3710  | -1.47 | -0.55 | 3.5E-10 | -1.56 | -0.64 | 1.7E-13 |
| Fbxo25 | 3316  | 1.33  | 0.41  | 1.3E-05 | 1.33  | 0.41  | 1.1E-05 |
| Fbxo27 | 347   | 1.47  | 0.55  | 8.3E-05 | 1.39  | 0.48  | 8.8E-04 |
| Fbxo31 | 2805  | 2.07  | 1.05  | 7.4E-16 | 1.94  | 0.96  | 2.2E-13 |
| Fbxo33 | 1584  | 1.59  | 0.67  | 1.5E-17 | 1.51  | 0.59  | 6.6E-14 |

|          |       |       |       |         |       |       |         |
|----------|-------|-------|-------|---------|-------|-------|---------|
| Fbxo36   | 343   | 3.19  | 1.67  | 3.1E-30 | 2.87  | 1.52  | 4.4E-25 |
| Fbxo4    | 284   | -1.59 | -0.67 | 9.7E-12 | -1.47 | -0.56 | 1.6E-08 |
| Fbxo42   | 4700  | 1.43  | 0.52  | 2.0E-09 | 1.39  | 0.48  | 4.0E-08 |
| Fbxo46   | 1348  | 1.31  | 0.39  | 2.3E-04 | 1.28  | 0.35  | 9.7E-04 |
| Fbxo7    | 624   | -2.04 | -1.03 | 1.5E-11 | -2.18 | -1.12 | 1.6E-13 |
| Fbxo8    | 1641  | 1.32  | 0.40  | 3.2E-08 | 1.33  | 0.41  | 2.0E-08 |
| Fbxw17   | 1384  | -1.44 | -0.52 | 1.7E-14 | -1.43 | -0.52 | 3.6E-14 |
| Fbxw4    | 698   | -1.86 | -0.90 | 6.8E-22 | -2.07 | -1.05 | 1.3E-29 |
| Fbxw7    | 5430  | 1.62  | 0.70  | 7.8E-20 | 1.59  | 0.67  | 3.6E-18 |
| Fcgr3    | 267   | -1.59 | -0.66 | 7.3E-04 | -1.55 | -0.63 | 1.4E-03 |
| Fcho1    | 4276  | 1.86  | 0.89  | 1.5E-07 | 1.70  | 0.77  | 7.5E-06 |
| Fchsd1   | 2990  | 3.28  | 1.71  | 1.2E-54 | 3.24  | 1.70  | 1.4E-53 |
| Fchsd2   | 5823  | -1.31 | -0.39 | 3.3E-03 | -1.29 | -0.36 | 6.2E-03 |
| Fcrls    | 592   | -1.55 | -0.63 | 9.4E-05 | -1.50 | -0.59 | 2.9E-04 |
| Fcsk     | 1452  | 1.39  | 0.48  | 3.2E-07 | 1.26  | 0.33  | 5.5E-04 |
| Fdxacb1  | 471   | -2.83 | -1.50 | 1.9E-55 | -3.04 | -1.61 | 3.6E-63 |
| Fdxr     | 1181  | 1.25  | 0.32  | 1.4E-02 | 1.26  | 0.33  | 1.1E-02 |
| Fem1b    | 27041 | 1.31  | 0.39  | 2.7E-05 | 1.32  | 0.40  | 2.4E-05 |
| Fermt1   | 105   | -5.84 | -2.55 | 4.8E-04 | -5.28 | -2.40 | 1.1E-03 |
| Fes      | 460   | -2.58 | -1.37 | 2.7E-23 | -2.77 | -1.47 | 1.4E-26 |
| Fez2     | 1807  | 1.40  | 0.48  | 1.6E-18 | 1.36  | 0.44  | 9.9E-16 |
| Fezf2    | 1417  | -1.73 | -0.79 | 5.8E-03 | -1.99 | -1.00 | 4.1E-04 |
| Fgd3     | 1058  | -1.33 | -0.41 | 1.0E-02 | -1.43 | -0.51 | 1.1E-03 |
| Fgd4     | 4039  | -2.39 | -1.26 | 3.5E-15 | -2.16 | -1.11 | 4.8E-12 |
| Fgd5     | 1667  | -1.42 | -0.50 | 2.1E-04 | -1.38 | -0.46 | 7.7E-04 |
| Fgd6     | 3623  | 2.21  | 1.14  | 3.2E-34 | 2.39  | 1.26  | 4.2E-41 |
| Fgf11    | 2991  | 2.83  | 1.50  | 2.1E-29 | 2.81  | 1.49  | 5.0E-29 |
| Fgf15    | 1934  | -1.55 | -0.64 | 5.4E-04 | -1.80 | -0.85 | 2.5E-06 |
| Fgf18    | 123   | -2.31 | -1.21 | 3.5E-05 | -2.11 | -1.08 | 2.5E-04 |
| Fgf2     | 295   | -2.94 | -1.56 | 3.9E-15 | -2.79 | -1.48 | 1.1E-13 |
| Fgf3     | 153   | -1.90 | -0.92 | 1.7E-02 | -2.55 | -1.35 | 3.6E-04 |
| Fgfbp3   | 1992  | -1.61 | -0.68 | 6.1E-04 | -1.74 | -0.80 | 5.3E-05 |
| Fgfr1op2 | 6435  | 1.26  | 0.33  | 5.9E-05 | 1.31  | 0.38  | 3.4E-06 |
| Fgfr3    | 7687  | -1.49 | -0.57 | 4.4E-04 | -1.69 | -0.76 | 2.3E-06 |
| Fgfrl1   | 1853  | 1.59  | 0.67  | 6.8E-05 | 1.47  | 0.55  | 1.1E-03 |
| Fhdc1    | 667   | 1.32  | 0.40  | 2.6E-03 | 1.46  | 0.55  | 3.0E-05 |
| Fhl2     | 217   | -1.51 | -0.59 | 2.1E-02 | -1.74 | -0.80 | 1.6E-03 |
| Fhod1    | 1722  | 2.00  | 1.00  | 2.7E-09 | 1.74  | 0.80  | 2.7E-06 |
| Fibin    | 898   | -4.54 | -2.18 | 3.6E-04 | -3.82 | -1.93 | 1.8E-03 |
| Fig4     | 3204  | 2.15  | 1.10  | 4.9E-48 | 2.21  | 1.15  | 1.8E-51 |
| Fitm2    | 1371  | 1.22  | 0.28  | 1.5E-07 | 1.25  | 0.33  | 1.1E-09 |
| Fiz1     | 2808  | -2.09 | -1.06 | 9.1E-28 | -2.25 | -1.17 | 1.9E-33 |
| Fjx1     | 2433  | -1.32 | -0.40 | 1.6E-03 | -1.42 | -0.51 | 5.1E-05 |
| Fkbp11   | 289   | 1.65  | 0.73  | 7.9E-05 | 1.56  | 0.64  | 6.1E-04 |
| Fkbp14   | 3396  | 2.54  | 1.34  | 2.1E-33 | 2.71  | 1.44  | 4.8E-38 |
| Fkbp5    | 5988  | 1.62  | 0.69  | 2.1E-10 | 1.50  | 0.58  | 1.3E-07 |
| Fkbp1    | 574   | 1.24  | 0.31  | 4.2E-03 | 1.28  | 0.36  | 9.7E-04 |

|        |       |       |       |         |       |       |         |
|--------|-------|-------|-------|---------|-------|-------|---------|
| Fkrp   | 1757  | -2.59 | -1.38 | 4.4E-61 | -2.66 | -1.41 | 1.7E-64 |
| Fktn   | 3633  | -1.32 | -0.40 | 2.5E-06 | -1.29 | -0.37 | 2.2E-05 |
| Flad1  | 1338  | -1.49 | -0.57 | 6.5E-14 | -1.53 | -0.62 | 6.9E-16 |
| Fli1   | 720   | -2.11 | -1.08 | 9.2E-08 | -2.34 | -1.22 | 1.0E-09 |
| Flot1  | 2825  | 1.57  | 0.65  | 2.2E-12 | 1.42  | 0.51  | 6.3E-08 |
| Flrt2  | 7693  | -1.73 | -0.79 | 2.6E-08 | -1.52 | -0.60 | 3.0E-05 |
| Flvcr1 | 2493  | 1.91  | 0.94  | 2.4E-29 | 1.76  | 0.82  | 1.7E-22 |
| Flvcr2 | 242   | 1.53  | 0.61  | 6.7E-05 | 1.37  | 0.45  | 3.9E-03 |
| Fmc1   | 463   | -1.39 | -0.48 | 4.4E-03 | -1.39 | -0.47 | 5.1E-03 |
| Fmn1   | 217   | -2.81 | -1.49 | 7.2E-04 | -2.01 | -1.01 | 2.7E-02 |
| Fmo1   | 1524  | -2.21 | -1.15 | 1.8E-05 | -2.37 | -1.24 | 3.1E-06 |
| Fn3k   | 279   | 1.68  | 0.75  | 2.1E-14 | 1.71  | 0.78  | 2.9E-15 |
| Fn3krp | 1919  | 1.83  | 0.87  | 9.1E-37 | 1.73  | 0.79  | 1.4E-30 |
| Fnbp1l | 43753 | -1.68 | -0.75 | 6.0E-06 | -1.60 | -0.68 | 5.4E-05 |
| Fndc3b | 3394  | -1.38 | -0.46 | 2.6E-03 | -1.25 | -0.33 | 4.1E-02 |
| Fndc4  | 3380  | -1.30 | -0.38 | 7.1E-09 | -1.37 | -0.45 | 2.9E-12 |
| Fnip1  | 5694  | 1.57  | 0.65  | 6.2E-11 | 1.69  | 0.76  | 1.2E-14 |
| Fnip2  | 4024  | 1.38  | 0.47  | 3.1E-05 | 1.41  | 0.49  | 1.1E-05 |
| Fntb   | 1654  | -1.75 | -0.81 | 2.8E-25 | -1.82 | -0.86 | 1.9E-28 |
| Focad  | 2776  | 1.50  | 0.59  | 2.5E-11 | 1.55  | 0.63  | 7.3E-13 |
| Folr1  | 192   | -1.60 | -0.68 | 1.6E-02 | -1.70 | -0.76 | 6.8E-03 |
| Fos    | 108   | 1.92  | 0.94  | 1.0E-03 | 2.49  | 1.32  | 3.2E-06 |
| Foxa1  | 549   | -1.47 | -0.55 | 2.2E-02 | -1.75 | -0.81 | 5.7E-04 |
| Foxc1  | 1824  | -1.79 | -0.84 | 6.9E-04 | -2.13 | -1.09 | 7.9E-06 |
| Foxf2  | 516   | -1.34 | -0.42 | 8.5E-03 | -1.35 | -0.43 | 7.6E-03 |
| Foxj1  | 1534  | 1.24  | 0.31  | 4.0E-02 | 1.30  | 0.38  | 1.1E-02 |
| Foxj2  | 1949  | 1.29  | 0.36  | 8.3E-03 | 1.26  | 0.34  | 1.5E-02 |
| Foxk1  | 6300  | 1.42  | 0.51  | 2.6E-04 | 1.33  | 0.41  | 3.6E-03 |
| Foxl2  | 300   | -1.93 | -0.95 | 6.5E-03 | -2.40 | -1.26 | 2.5E-04 |
| Foxm1  | 5223  | -1.42 | -0.50 | 4.9E-03 | -1.62 | -0.69 | 8.1E-05 |
| Foxo1  | 2595  | 1.84  | 0.88  | 2.8E-13 | 1.80  | 0.85  | 1.8E-12 |
| Foxo3  | 4755  | 1.66  | 0.74  | 1.9E-11 | 1.70  | 0.77  | 2.6E-12 |
| Foxo4  | 3776  | 1.37  | 0.45  | 1.8E-05 | 1.36  | 0.44  | 3.1E-05 |
| Foxo6  | 990   | 1.56  | 0.64  | 1.2E-02 | 1.50  | 0.59  | 2.3E-02 |
| Foxp2  | 6899  | -1.49 | -0.58 | 2.2E-08 | -1.58 | -0.66 | 1.6E-10 |
| Foxq1  | 238   | -1.28 | -0.35 | 2.2E-02 | -1.40 | -0.49 | 1.2E-03 |
| Fpgt   | 1526  | -1.27 | -0.35 | 4.3E-04 | -1.17 | -0.23 | 2.5E-02 |
| Frat1  | 1231  | 1.85  | 0.89  | 2.6E-09 | 1.57  | 0.65  | 1.8E-05 |
| Frat2  | 1496  | 1.65  | 0.73  | 9.8E-08 | 1.49  | 0.57  | 3.2E-05 |
| Frg2f1 | 271   | -1.33 | -0.41 | 2.7E-02 | -1.35 | -0.44 | 2.0E-02 |
| Frk    | 338   | -3.44 | -1.78 | 2.6E-06 | -3.42 | -1.77 | 3.2E-06 |
| Frmd3  | 746   | -2.44 | -1.29 | 1.1E-05 | -2.05 | -1.04 | 5.0E-04 |
| Frmd4a | 12232 | -2.17 | -1.12 | 1.5E-26 | -2.10 | -1.07 | 2.1E-24 |
| Frmd4b | 5483  | -1.30 | -0.38 | 3.1E-09 | -1.30 | -0.38 | 4.9E-09 |
| Frmd8  | 2840  | 1.94  | 0.96  | 7.5E-18 | 1.90  | 0.92  | 1.0E-16 |
| Frmpd1 | 237   | -1.38 | -0.47 | 1.4E-02 | -1.35 | -0.43 | 2.5E-02 |
| Frrs1  | 547   | -1.68 | -0.75 | 1.6E-07 | -1.75 | -0.81 | 1.4E-08 |

|            |       |       |       |         |       |       |         |
|------------|-------|-------|-------|---------|-------|-------|---------|
| Fryl       | 10889 | 1.65  | 0.73  | 2.4E-09 | 1.74  | 0.80  | 4.0E-11 |
| Fsbp       | 229   | -1.98 | -0.99 | 1.0E-08 | -2.01 | -1.00 | 6.7E-09 |
| Fsd1       | 2961  | 1.42  | 0.50  | 1.8E-04 | 1.36  | 0.44  | 1.1E-03 |
| Fst        | 1006  | -1.41 | -0.49 | 2.3E-02 | -1.83 | -0.87 | 3.1E-05 |
| Fstl3      | 146   | 3.32  | 1.73  | 1.3E-09 | 2.98  | 1.58  | 4.5E-08 |
| Ftsj1      | 2682  | 1.47  | 0.56  | 4.7E-19 | 1.42  | 0.51  | 8.5E-16 |
| Ftsj3      | 8106  | 1.50  | 0.58  | 1.9E-08 | 1.42  | 0.50  | 1.7E-06 |
| Fubp1      | 40486 | -1.33 | -0.41 | 7.9E-08 | -1.27 | -0.34 | 7.3E-06 |
| Fuca1      | 2707  | 1.96  | 0.97  | 5.8E-98 | 1.80  | 0.85  | 7.0E-75 |
| Fundc1     | 2603  | -1.71 | -0.77 | 1.1E-19 | -1.63 | -0.70 | 2.4E-16 |
| Fundc2     | 3228  | -1.31 | -0.39 | 1.1E-06 | -1.31 | -0.39 | 1.6E-06 |
| Fus        | 58452 | -1.32 | -0.40 | 6.0E-03 | -1.49 | -0.58 | 5.2E-05 |
| Fut10      | 3079  | 2.19  | 1.13  | 1.4E-16 | 2.16  | 1.11  | 3.9E-16 |
| Fut4       | 139   | -1.42 | -0.50 | 2.4E-02 | -1.51 | -0.59 | 8.1E-03 |
| Fuz        | 1216  | -1.23 | -0.30 | 5.2E-03 | -1.32 | -0.40 | 1.4E-04 |
| Fv1        | 1634  | 2.05  | 1.04  | 1.8E-51 | 2.05  | 1.04  | 3.0E-51 |
| Fxn        | 615   | -1.96 | -0.97 | 1.2E-17 | -2.04 | -1.03 | 1.4E-19 |
| Fyb        | 173   | -2.30 | -1.20 | 1.2E-08 | -2.25 | -1.17 | 3.3E-08 |
| Fyco1      | 2757  | 1.46  | 0.55  | 6.1E-07 | 1.51  | 0.59  | 6.2E-08 |
| Fyttd1     | 12474 | 1.30  | 0.38  | 1.9E-06 | 1.35  | 0.43  | 5.6E-08 |
| Fzd5       | 608   | 2.35  | 1.24  | 1.0E-10 | 1.80  | 0.85  | 1.3E-05 |
| G0s2       | 110   | -2.25 | -1.17 | 1.6E-06 | -2.30 | -1.20 | 7.9E-07 |
| Gaa        | 4614  | 1.31  | 0.39  | 1.1E-02 | 1.32  | 0.41  | 8.5E-03 |
| Gab3       | 120   | 2.53  | 1.34  | 5.1E-17 | 2.09  | 1.07  | 1.9E-11 |
| Gabarapl1  | 8427  | 1.45  | 0.53  | 2.4E-12 | 1.40  | 0.49  | 1.9E-10 |
| Gabarapl2  | 6142  | 1.32  | 0.40  | 7.4E-06 | 1.32  | 0.40  | 5.2E-06 |
| Gabbr2     | 570   | -2.47 | -1.30 | 7.9E-03 | -2.25 | -1.17 | 1.9E-02 |
| Gabpa      | 6018  | -1.47 | -0.56 | 1.2E-15 | -1.48 | -0.57 | 5.0E-16 |
| Gabpb1     | 3868  | -1.53 | -0.62 | 1.9E-09 | -1.69 | -0.76 | 6.4E-14 |
| Gabpb2     | 5710  | -2.39 | -1.26 | 9.2E-30 | -2.20 | -1.14 | 1.6E-24 |
| Gabra1     | 591   | -1.75 | -0.81 | 2.6E-03 | -1.68 | -0.75 | 5.9E-03 |
| Gabra2     | 1504  | -1.66 | -0.73 | 1.8E-02 | -1.77 | -0.83 | 7.2E-03 |
| Gabra4     | 739   | 2.46  | 1.30  | 3.0E-08 | 2.63  | 1.39  | 2.6E-09 |
| Gabre      | 736   | 2.44  | 1.29  | 1.4E-36 | 2.45  | 1.29  | 7.5E-37 |
| Gabrg1     | 541   | 3.41  | 1.77  | 5.3E-16 | 3.10  | 1.63  | 7.7E-14 |
| Gabrg2     | 3554  | -2.47 | -1.30 | 5.0E-07 | -2.25 | -1.17 | 7.1E-06 |
| Gabrq      | 1039  | 3.52  | 1.81  | 1.1E-36 | 3.63  | 1.86  | 1.9E-38 |
| Gad1       | 3462  | -2.50 | -1.32 | 1.0E-04 | -2.54 | -1.35 | 7.7E-05 |
| Gad2       | 5532  | -3.18 | -1.67 | 2.9E-08 | -3.38 | -1.76 | 4.9E-09 |
| Gadd45gip1 | 1310  | -1.72 | -0.78 | 2.2E-16 | -1.74 | -0.80 | 4.7E-17 |
| Gal3st3    | 791   | -1.33 | -0.41 | 8.2E-03 | -1.47 | -0.56 | 2.5E-04 |
| Galc       | 2296  | -1.30 | -0.38 | 1.1E-07 | -1.32 | -0.40 | 2.5E-08 |
| Gale       | 1183  | 1.89  | 0.92  | 1.8E-20 | 1.73  | 0.79  | 1.6E-15 |
| Galns      | 568   | 1.50  | 0.59  | 3.9E-04 | 1.44  | 0.53  | 1.7E-03 |
| Galnt1     | 7835  | -1.43 | -0.52 | 1.3E-08 | -1.43 | -0.52 | 1.1E-08 |
| Galnt10    | 4324  | 1.96  | 0.97  | 2.5E-16 | 1.91  | 0.93  | 4.3E-15 |
| Galnt12    | 352   | 2.15  | 1.10  | 3.3E-06 | 1.85  | 0.89  | 2.4E-04 |



|         |       |       |       |         |       |       |         |
|---------|-------|-------|-------|---------|-------|-------|---------|
| Galnt14 | 565   | -2.75 | -1.46 | 7.3E-21 | -2.53 | -1.34 | 1.2E-17 |
| Galnt5  | 124   | -3.70 | -1.89 | 2.6E-03 | -3.74 | -1.90 | 2.6E-03 |
| Galnt7  | 2010  | -1.47 | -0.56 | 1.3E-10 | -1.45 | -0.53 | 7.3E-10 |
| Gamt    | 468   | 1.43  | 0.52  | 5.3E-03 | 1.42  | 0.50  | 7.4E-03 |
| Gan     | 3930  | 1.39  | 0.47  | 5.0E-05 | 1.40  | 0.48  | 3.5E-05 |
| Garem1  | 2204  | 1.92  | 0.94  | 1.6E-12 | 2.20  | 1.14  | 1.2E-17 |
| Garnl3  | 2398  | 1.85  | 0.89  | 2.1E-10 | 2.05  | 1.04  | 7.2E-14 |
| Gart    | 10721 | 1.96  | 0.97  | 9.5E-18 | 1.77  | 0.82  | 4.6E-13 |
| Gas1    | 5642  | -1.78 | -0.83 | 7.0E-06 | -1.92 | -0.94 | 3.1E-07 |
| Gas2    | 1719  | -1.55 | -0.63 | 2.7E-04 | -1.45 | -0.54 | 2.1E-03 |
| Gas2l1  | 2396  | 2.68  | 1.42  | 1.2E-27 | 2.51  | 1.33  | 3.1E-24 |
| Gas2l3  | 2510  | 1.30  | 0.38  | 2.3E-04 | 1.32  | 0.40  | 7.5E-05 |
| Gas6    | 1399  | 1.51  | 0.59  | 8.8E-05 | 1.41  | 0.50  | 1.2E-03 |
| Gas7    | 1662  | -1.64 | -0.71 | 6.9E-03 | -1.67 | -0.74 | 4.8E-03 |
| Gas8    | 3924  | 1.49  | 0.58  | 2.1E-10 | 1.40  | 0.49  | 1.1E-07 |
| Gask1b  | 385   | -3.66 | -1.87 | 9.1E-10 | -3.38 | -1.76 | 1.0E-08 |
| Gata2   | 1069  | -1.56 | -0.64 | 5.1E-03 | -1.74 | -0.80 | 4.6E-04 |
| Gatad2a | 7326  | 1.45  | 0.54  | 2.5E-07 | 1.32  | 0.40  | 1.6E-04 |
| Gatb    | 739   | -1.90 | -0.92 | 1.5E-20 | -1.78 | -0.83 | 5.3E-17 |
| Gatd1   | 1870  | -1.44 | -0.53 | 1.2E-13 | -1.59 | -0.67 | 2.1E-21 |
| Gba     | 2522  | 1.47  | 0.55  | 4.2E-14 | 1.46  | 0.55  | 8.1E-14 |
| Gba2    | 6864  | 1.51  | 0.59  | 2.2E-13 | 1.45  | 0.53  | 5.0E-11 |
| Gbe1    | 851   | -1.62 | -0.70 | 4.7E-07 | -1.67 | -0.74 | 7.3E-08 |
| Gbp7    | 141   | -2.29 | -1.20 | 2.9E-12 | -2.25 | -1.17 | 9.1E-12 |
| Gbp9    | 205   | -2.37 | -1.24 | 2.7E-08 | -2.59 | -1.37 | 6.4E-10 |
| Gbx1    | 311   | -2.29 | -1.20 | 3.5E-03 | -2.39 | -1.26 | 2.2E-03 |
| Gca     | 1493  | 3.99  | 2.00  | 2.3E-40 | 3.93  | 1.97  | 1.9E-39 |
| Gcat    | 161   | 2.19  | 1.13  | 2.0E-07 | 2.25  | 1.17  | 8.8E-08 |
| Gcdh    | 3383  | 2.08  | 1.06  | 7.6E-69 | 1.95  | 0.96  | 3.5E-57 |
| Gch1    | 460   | 5.58  | 2.48  | 7.6E-65 | 5.25  | 2.39  | 1.8E-60 |
| Gck     | 180   | -1.50 | -0.59 | 1.3E-03 | -1.80 | -0.85 | 2.0E-06 |
| Gclc    | 5236  | 1.89  | 0.92  | 7.7E-41 | 1.93  | 0.95  | 2.0E-43 |
| Gcsh    | 4319  | 1.49  | 0.57  | 1.6E-06 | 1.41  | 0.50  | 4.2E-05 |
| Gdap2   | 2521  | 1.47  | 0.56  | 2.0E-10 | 1.48  | 0.56  | 1.5E-10 |
| Gde1    | 4093  | 1.41  | 0.49  | 6.3E-10 | 1.42  | 0.51  | 1.9E-10 |
| Gdf10   | 847   | -2.94 | -1.56 | 1.1E-04 | -2.43 | -1.28 | 1.7E-03 |
| Gdf11   | 5930  | 1.88  | 0.91  | 2.4E-15 | 1.64  | 0.72  | 7.1E-10 |
| Gdf5    | 103   | -3.07 | -1.62 | 8.0E-12 | -2.66 | -1.41 | 3.7E-09 |
| Gdpd1   | 4982  | -1.60 | -0.67 | 1.5E-05 | -1.58 | -0.66 | 2.7E-05 |
| Gdpd2   | 998   | -1.39 | -0.48 | 5.4E-03 | -1.43 | -0.52 | 2.6E-03 |
| Gdpd5   | 3727  | 1.47  | 0.55  | 2.2E-04 | 1.41  | 0.50  | 1.0E-03 |
| Gdpgp1  | 755   | 2.34  | 1.22  | 7.5E-40 | 2.27  | 1.18  | 5.4E-37 |
| Gem     | 273   | 1.98  | 0.98  | 3.5E-16 | 1.90  | 0.92  | 2.2E-14 |
| Gemin5  | 6237  | 1.82  | 0.86  | 1.5E-23 | 1.83  | 0.87  | 6.5E-24 |
| Gemin6  | 770   | -1.37 | -0.46 | 1.4E-03 | -1.39 | -0.48 | 8.7E-04 |
| Get4    | 2170  | -1.25 | -0.32 | 2.9E-04 | -1.31 | -0.38 | 1.4E-05 |
| Gfer    | 1341  | -1.40 | -0.49 | 7.1E-11 | -1.45 | -0.53 | 9.2E-13 |

|        |      |       |       |         |       |       |         |
|--------|------|-------|-------|---------|-------|-------|---------|
| Gfod1  | 1416 | 1.47  | 0.56  | 9.5E-03 | 1.54  | 0.62  | 3.8E-03 |
| Gfpt2  | 1177 | 1.67  | 0.74  | 1.2E-07 | 1.78  | 0.83  | 2.5E-09 |
| Gfra1  | 3622 | -1.55 | -0.63 | 2.1E-04 | -1.28 | -0.36 | 4.4E-02 |
| Gfra4  | 183  | -2.28 | -1.19 | 5.0E-06 | -2.08 | -1.05 | 6.2E-05 |
| Gga1   | 3531 | -1.46 | -0.54 | 6.5E-05 | -1.56 | -0.64 | 1.8E-06 |
| Gga2   | 8276 | 1.33  | 0.41  | 3.9E-09 | 1.25  | 0.32  | 5.8E-06 |
| Ggact  | 204  | -1.29 | -0.36 | 9.5E-03 | -1.27 | -0.34 | 1.7E-02 |
| Ggct   | 639  | 1.83  | 0.87  | 4.2E-37 | 1.96  | 0.97  | 1.9E-45 |
| Ggcx   | 132  | 2.65  | 1.41  | 6.9E-05 | -1.68 | -0.75 | 4.4E-02 |
| Ggn    | 146  | 2.21  | 1.14  | 1.2E-18 | 2.04  | 1.03  | 1.9E-15 |
| Ggt5   | 149  | -1.64 | -0.71 | 1.5E-04 | -2.05 | -1.04 | 1.6E-08 |
| Ggta1  | 834  | -1.34 | -0.42 | 1.3E-02 | -1.35 | -0.43 | 1.0E-02 |
| Ghdc   | 476  | 1.40  | 0.49  | 1.6E-02 | 1.34  | 0.42  | 4.2E-02 |
| Ghr    | 1697 | -1.85 | -0.88 | 9.4E-04 | -1.60 | -0.68 | 1.4E-02 |
| Gid4   | 5221 | 1.66  | 0.73  | 3.4E-16 | 1.59  | 0.67  | 9.9E-14 |
| Gimap4 | 212  | -2.02 | -1.01 | 3.3E-11 | -2.00 | -1.00 | 5.6E-11 |
| Gimap6 | 412  | -1.64 | -0.71 | 1.5E-05 | -1.36 | -0.44 | 9.9E-03 |
| Gimap8 | 132  | -2.59 | -1.37 | 2.0E-19 | -2.54 | -1.35 | 1.6E-18 |
| Gin1   | 729  | -1.71 | -0.78 | 1.1E-17 | -1.60 | -0.67 | 1.2E-13 |
| Gins1  | 1687 | -1.49 | -0.58 | 9.9E-04 | -1.63 | -0.70 | 5.1E-05 |
| Gins2  | 2081 | 1.55  | 0.63  | 4.5E-04 | 1.39  | 0.48  | 9.5E-03 |
| Gins3  | 1696 | 1.68  | 0.75  | 2.4E-07 | 1.63  | 0.70  | 1.4E-06 |
| Gins4  | 2733 | 1.39  | 0.48  | 4.0E-04 | 1.29  | 0.37  | 8.4E-03 |
| Gipc1  | 4619 | 1.42  | 0.51  | 2.3E-06 | 1.28  | 0.36  | 9.8E-04 |
| Gipc2  | 110  | 1.63  | 0.70  | 3.4E-05 | 1.76  | 0.81  | 1.4E-06 |
| Gipr   | 596  | 2.14  | 1.10  | 1.2E-07 | 2.07  | 1.05  | 3.9E-07 |
| Git1   | 8435 | 1.65  | 0.72  | 1.2E-09 | 1.55  | 0.63  | 1.5E-07 |
| Git2   | 4258 | 1.31  | 0.39  | 2.4E-10 | 1.36  | 0.44  | 8.0E-13 |
| Gja1   | 9093 | -2.66 | -1.41 | 7.9E-22 | -2.96 | -1.57 | 1.3E-26 |
| Gja4   | 397  | -1.39 | -0.47 | 3.6E-04 | -1.50 | -0.59 | 7.4E-06 |
| Gja5   | 313  | -3.74 | -1.90 | 5.9E-11 | -3.94 | -1.98 | 9.2E-12 |
| Gjb6   | 465  | -5.42 | -2.44 | 4.9E-20 | -5.69 | -2.51 | 5.1E-21 |
| Gjc1   | 5342 | -1.22 | -0.29 | 4.4E-02 | -1.33 | -0.41 | 2.9E-03 |
| Gjd2   | 871  | -1.98 | -0.98 | 2.2E-04 | -1.93 | -0.95 | 3.8E-04 |
| Gk     | 1714 | 2.06  | 1.04  | 6.2E-32 | 2.06  | 1.05  | 4.3E-32 |
| Gk5    | 932  | 1.74  | 0.80  | 1.9E-06 | 2.11  | 1.08  | 9.5E-11 |
| Gkap1  | 2822 | 1.43  | 0.51  | 9.3E-09 | 1.36  | 0.44  | 9.4E-07 |
| Gla    | 1237 | 2.24  | 1.17  | 1.5E-33 | 2.08  | 1.05  | 1.8E-27 |
| Glb1l  | 1778 | -1.33 | -0.42 | 2.4E-07 | -1.32 | -0.40 | 7.8E-07 |
| Glb1l2 | 428  | 1.34  | 0.42  | 1.3E-03 | 1.27  | 0.34  | 1.1E-02 |
| Glce   | 4012 | 1.43  | 0.51  | 1.4E-04 | 1.57  | 0.65  | 1.1E-06 |
| Gli2   | 2735 | -1.79 | -0.84 | 1.0E-07 | -1.89 | -0.92 | 5.9E-09 |
| Gli3   | 7586 | -1.36 | -0.44 | 6.1E-03 | -1.44 | -0.53 | 9.1E-04 |
| Glis3  | 662  | -1.49 | -0.57 | 6.5E-04 | -1.44 | -0.52 | 2.0E-03 |
| GImp   | 2725 | 1.48  | 0.57  | 1.1E-07 | 1.44  | 0.53  | 8.9E-07 |
| Glrx   | 1131 | 1.88  | 0.91  | 4.3E-22 | 2.01  | 1.01  | 1.5E-26 |
| Glrx5  | 3014 | 1.77  | 0.82  | 1.4E-14 | 1.60  | 0.68  | 3.5E-10 |

|         |      |       |       |         |       |       |         |
|---------|------|-------|-------|---------|-------|-------|---------|
| Gls2    | 319  | 4.06  | 2.02  | 2.3E-62 | 4.84  | 2.28  | 4.0E-75 |
| Glt1d1  | 409  | -2.54 | -1.34 | 8.5E-15 | -2.94 | -1.56 | 2.3E-19 |
| Glt8d1  | 4240 | -1.42 | -0.50 | 2.8E-21 | -1.44 | -0.53 | 2.5E-23 |
| Glt8d2  | 236  | -3.39 | -1.76 | 2.4E-06 | -2.98 | -1.57 | 2.9E-05 |
| Glyctk  | 135  | -2.01 | -1.01 | 4.5E-06 | -2.18 | -1.12 | 3.5E-07 |
| Gm10037 | 225  | -1.41 | -0.49 | 8.4E-03 | -1.39 | -0.48 | 1.2E-02 |
| Gm10226 | 301  | 1.28  | 0.36  | 6.1E-03 | 1.30  | 0.38  | 3.8E-03 |
| Gm10406 | 198  | -3.41 | -1.77 | 1.8E-22 | -4.09 | -2.03 | 2.2E-28 |
| Gm1141  | 166  | 2.05  | 1.03  | 8.4E-11 | 1.97  | 0.98  | 6.1E-10 |
| Gm11627 | 194  | -2.44 | -1.29 | 3.0E-09 | -2.58 | -1.37 | 3.2E-10 |
| Gm12184 | 863  | -1.91 | -0.93 | 2.9E-11 | -2.11 | -1.08 | 1.2E-14 |
| Gm13199 | 201  | 3.05  | 1.61  | 1.1E-16 | 2.56  | 1.36  | 2.6E-12 |
| Gm13889 | 360  | -1.49 | -0.57 | 4.6E-02 | -1.64 | -0.71 | 1.2E-02 |
| Gm14403 | 283  | 1.42  | 0.50  | 5.0E-03 | 1.70  | 0.77  | 1.3E-05 |
| Gm14443 | 290  | 1.45  | 0.53  | 3.1E-05 | 1.52  | 0.60  | 2.4E-06 |
| Gm14698 | 269  | 1.28  | 0.35  | 3.7E-02 | 1.31  | 0.39  | 2.0E-02 |
| Gm15446 | 2257 | 1.25  | 0.33  | 4.2E-03 | 1.36  | 0.44  | 8.4E-05 |
| Gm17655 | 130  | 1.46  | 0.55  | 5.5E-04 | 1.44  | 0.53  | 8.3E-04 |
| Gm19426 | 193  | -2.31 | -1.21 | 3.1E-12 | -2.52 | -1.33 | 2.0E-14 |
| Gm20075 | 1385 | -1.74 | -0.80 | 2.5E-09 | -1.76 | -0.82 | 8.2E-10 |
| Gm2115  | 108  | -2.38 | -1.25 | 8.6E-08 | -2.52 | -1.33 | 1.0E-08 |
| Gm21992 | 810  | 2.55  | 1.35  | 5.5E-08 | 2.18  | 1.12  | 7.5E-06 |
| Gm2237  | 528  | -1.70 | -0.77 | 1.8E-10 | -1.73 | -0.79 | 6.3E-11 |
| Gm2897  | 350  | -1.55 | -0.63 | 5.9E-05 | -1.50 | -0.59 | 2.3E-04 |
| Gm29695 | 1260 | -3.27 | -1.71 | 1.4E-22 | -3.49 | -1.80 | 5.6E-25 |
| Gm2974  | 142  | -3.33 | -1.74 | 2.1E-08 | -3.31 | -1.73 | 2.2E-08 |
| Gm2a    | 1586 | 1.89  | 0.92  | 4.4E-28 | 1.92  | 0.94  | 3.2E-29 |
| Gm3055  | 181  | -1.65 | -0.72 | 1.4E-06 | -1.52 | -0.60 | 7.9E-05 |
| Gm3252  | 108  | -3.00 | -1.59 | 4.3E-09 | -3.33 | -1.74 | 1.4E-10 |
| Gm32687 | 231  | -2.16 | -1.11 | 3.1E-15 | -2.18 | -1.13 | 2.3E-15 |
| Gm3468  | 248  | -2.62 | -1.39 | 6.3E-18 | -2.47 | -1.30 | 8.6E-16 |
| Gm35339 | 1143 | 1.34  | 0.42  | 1.7E-02 | 1.36  | 0.45  | 1.2E-02 |
| Gm3636  | 685  | -1.64 | -0.71 | 2.8E-12 | -1.71 | -0.78 | 2.1E-14 |
| Gm3667  | 153  | -3.80 | -1.93 | 2.8E-16 | -3.58 | -1.84 | 9.5E-15 |
| Gm3696  | 169  | -3.32 | -1.73 | 9.1E-26 | -3.10 | -1.63 | 7.4E-23 |
| Gm3739  | 365  | -1.70 | -0.77 | 3.1E-09 | -1.67 | -0.74 | 1.2E-08 |
| Gm3752  | 139  | -2.99 | -1.58 | 1.1E-08 | -3.93 | -1.97 | 6.6E-13 |
| Gm3854  | 398  | -2.85 | -1.51 | 9.7E-29 | -2.65 | -1.41 | 2.6E-25 |
| Gm42372 | 3027 | 2.41  | 1.27  | 4.9E-34 | 2.40  | 1.26  | 1.0E-33 |
| Gm42688 | 115  | 1.55  | 0.63  | 2.9E-04 | 1.63  | 0.71  | 5.1E-05 |
| Gm42715 | 288  | -2.72 | -1.44 | 3.8E-07 | -3.55 | -1.83 | 8.3E-11 |
| Gm45902 | 1531 | 1.21  | 0.27  | 3.1E-03 | 1.31  | 0.39  | 2.1E-05 |
| Gm4924  | 793  | -2.05 | -1.03 | 8.3E-16 | -2.03 | -1.02 | 1.6E-15 |
| Gm49322 | 172  | -1.49 | -0.58 | 2.5E-03 | -1.68 | -0.75 | 6.3E-05 |
| Gm49336 | 7744 | 1.34  | 0.42  | 4.1E-06 | 1.36  | 0.44  | 1.1E-06 |
| Gm49396 | 191  | -2.29 | -1.19 | 9.4E-14 | -2.51 | -1.33 | 1.4E-16 |
| Gm50387 | 243  | 1.54  | 0.62  | 2.1E-05 | 1.45  | 0.54  | 2.4E-04 |

|         |       |       |       |          |       |       |         |
|---------|-------|-------|-------|----------|-------|-------|---------|
| Gm5148  | 214   | 1.38  | 0.47  | 2.6E-02  | 1.49  | 0.58  | 5.2E-03 |
| Gm6169  | 103   | -1.57 | -0.65 | 1.6E-03  | -1.74 | -0.80 | 8.9E-05 |
| Gm7072  | 2178  | -1.27 | -0.35 | 1.5E-05  | -1.20 | -0.26 | 1.6E-03 |
| Gm7694  | 1043  | 1.48  | 0.57  | 2.2E-05  | 1.30  | 0.38  | 5.8E-03 |
| Gm8113  | 439   | -1.77 | -0.83 | 4.1E-08  | -1.39 | -0.48 | 2.4E-03 |
| Gm8251  | 473   | 4.56  | 2.19  | 3.6E-16  | 6.85  | 2.78  | 3.6E-25 |
| Gm8281  | 342   | -2.96 | -1.56 | 3.2E-23  | -2.69 | -1.43 | 1.4E-19 |
| Gm8773  | 153   | -1.91 | -0.93 | 8.4E-15  | -1.77 | -0.83 | 7.8E-12 |
| Gm960   | 252   | 3.27  | 1.71  | 2.1E-12  | 3.13  | 1.65  | 1.4E-11 |
| Gm973   | 140   | -2.27 | -1.18 | 5.4E-08  | -1.72 | -0.78 | 4.1E-04 |
| Gm9833  | 2800  | -1.48 | -0.57 | 2.4E-08  | -1.43 | -0.51 | 5.7E-07 |
| Gmeb1   | 3965  | -1.74 | -0.80 | 5.1E-33  | -1.80 | -0.85 | 5.8E-37 |
| Gmeb2   | 2345  | -2.62 | -1.39 | 1.7E-34  | -2.80 | -1.48 | 2.9E-39 |
| Gmfg    | 119   | -1.36 | -0.45 | 2.2E-02  | -1.34 | -0.42 | 3.3E-02 |
| Gmnc    | 454   | -5.89 | -2.56 | 6.1E-21  | -6.17 | -2.62 | 5.6E-22 |
| Gmppb   | 1101  | 1.48  | 0.57  | 1.9E-08  | 1.51  | 0.60  | 3.3E-09 |
| Gmpr    | 738   | 2.05  | 1.04  | 1.2E-19  | 2.01  | 1.00  | 2.0E-18 |
| Gmpr2   | 2079  | -1.55 | -0.63 | 1.2E-15  | -1.55 | -0.63 | 1.9E-15 |
| Gna11   | 6584  | 1.62  | 0.70  | 1.0E-16  | 1.47  | 0.56  | 3.9E-11 |
| Gna12   | 7711  | 1.25  | 0.32  | 8.8E-04  | 1.17  | 0.22  | 2.8E-02 |
| Gnai1   | 4191  | 1.42  | 0.50  | 4.4E-03  | 1.43  | 0.51  | 3.8E-03 |
| Gnai2   | 27733 | 1.59  | 0.67  | 1.2E-07  | 1.42  | 0.50  | 9.8E-05 |
| Gnai3   | 20244 | 1.24  | 0.31  | 1.6E-03  | 1.27  | 0.34  | 4.6E-04 |
| Gnaq    | 15834 | -1.32 | -0.40 | 4.5E-03  | -1.38 | -0.46 | 1.1E-03 |
| Gnaz    | 1957  | 1.67  | 0.74  | 1.4E-06  | 1.64  | 0.71  | 3.2E-06 |
| Gnb1l   | 483   | 1.57  | 0.65  | 2.1E-15  | 1.60  | 0.68  | 1.3E-16 |
| Gnb2    | 12033 | -1.18 | -0.24 | 2.2E-02  | -1.26 | -0.33 | 1.2E-03 |
| Gnb4    | 3977  | 1.21  | 0.27  | 2.8E-02  | 1.32  | 0.40  | 1.1E-03 |
| Gnb5    | 2854  | 2.17  | 1.12  | 1.5E-102 | 2.09  | 1.07  | 2.3E-93 |
| Gne     | 1958  | 1.21  | 0.27  | 4.3E-03  | 1.29  | 0.36  | 9.5E-05 |
| Gng11   | 698   | -1.75 | -0.80 | 1.1E-12  | -1.84 | -0.88 | 5.4E-15 |
| Gng12   | 3927  | 1.73  | 0.79  | 6.0E-11  | 1.76  | 0.82  | 1.5E-11 |
| Gng2    | 25537 | -1.38 | -0.47 | 5.3E-03  | -1.38 | -0.46 | 6.3E-03 |
| Gng4    | 880   | 1.56  | 0.64  | 4.9E-02  | 1.66  | 0.74  | 2.2E-02 |
| Gng7    | 1266  | 1.64  | 0.71  | 3.6E-10  | 1.64  | 0.71  | 3.2E-10 |
| Gnl1    | 5018  | 1.61  | 0.68  | 7.8E-08  | 1.45  | 0.54  | 3.1E-05 |
| Gnmt    | 141   | 4.21  | 2.07  | 7.8E-35  | 4.20  | 2.07  | 3.1E-34 |
| Gnptab  | 4426  | 1.25  | 0.32  | 3.1E-03  | 1.29  | 0.37  | 6.9E-04 |
| Gnrh1   | 223   | 2.28  | 1.19  | 1.3E-13  | 2.09  | 1.07  | 3.5E-11 |
| Gns     | 7927  | 1.66  | 0.73  | 1.2E-17  | 1.62  | 0.70  | 4.2E-16 |
| Golga1  | 4085  | -1.53 | -0.62 | 4.5E-16  | -1.45 | -0.54 | 2.2E-12 |
| Golgb1  | 13900 | 1.52  | 0.60  | 2.2E-04  | 1.80  | 0.85  | 1.1E-07 |
| Golm2   | 8324  | 1.42  | 0.51  | 2.5E-08  | 1.35  | 0.43  | 3.1E-06 |
| Golph3l | 3575  | 1.31  | 0.39  | 1.2E-05  | 1.41  | 0.50  | 2.5E-08 |
| Gosr1   | 2574  | -1.57 | -0.65 | 7.1E-28  | -1.66 | -0.73 | 3.5E-34 |
| Got1    | 4602  | 2.17  | 1.12  | 1.3E-48  | 2.01  | 1.00  | 1.7E-39 |
| Gpaa1   | 3100  | 1.31  | 0.39  | 2.1E-05  | 1.28  | 0.36  | 1.0E-04 |

|         |       |       |       |         |       |       |         |
|---------|-------|-------|-------|---------|-------|-------|---------|
| Gpam    | 5132  | 1.37  | 0.45  | 2.1E-14 | 1.40  | 0.48  | 3.9E-16 |
| Gpank1  | 1132  | 1.40  | 0.49  | 2.6E-06 | 1.29  | 0.37  | 5.6E-04 |
| Gpat4   | 12130 | 1.28  | 0.36  | 1.3E-15 | 1.22  | 0.28  | 4.7E-10 |
| Gpatch3 | 462   | -1.23 | -0.30 | 1.6E-02 | -1.39 | -0.48 | 6.7E-05 |
| Gpc1    | 11787 | -1.31 | -0.39 | 3.3E-03 | -1.47 | -0.56 | 1.5E-05 |
| Gpcpd1  | 5896  | -1.55 | -0.63 | 1.3E-09 | -1.47 | -0.55 | 1.5E-07 |
| Gpd1l   | 3737  | 1.89  | 0.91  | 1.0E-31 | 1.88  | 0.91  | 1.2E-31 |
| Gper1   | 147   | -1.95 | -0.97 | 2.4E-04 | -2.02 | -1.02 | 1.1E-04 |
| Gpkow   | 5534  | 1.29  | 0.37  | 2.7E-12 | 1.32  | 0.40  | 2.9E-14 |
| Gpn2    | 827   | 1.26  | 0.34  | 3.1E-03 | 1.18  | 0.24  | 4.2E-02 |
| Gpn3    | 1664  | 1.25  | 0.32  | 5.1E-04 | 1.18  | 0.24  | 8.9E-03 |
| Gpr135  | 446   | 1.62  | 0.69  | 7.2E-07 | 1.74  | 0.80  | 9.0E-09 |
| Gpr137c | 3083  | 1.35  | 0.43  | 1.6E-04 | 1.29  | 0.37  | 1.5E-03 |
| Gpr153  | 1775  | -1.27 | -0.34 | 3.6E-02 | -1.37 | -0.46 | 4.8E-03 |
| Gpr155  | 1773  | 2.54  | 1.35  | 2.4E-23 | 2.85  | 1.51  | 5.2E-29 |
| Gpr157  | 312   | 2.70  | 1.43  | 1.1E-13 | 2.56  | 1.35  | 2.7E-12 |
| Gpr161  | 7389  | -1.59 | -0.67 | 3.4E-05 | -1.61 | -0.69 | 1.9E-05 |
| Gpr162  | 3077  | -1.63 | -0.70 | 6.0E-03 | -1.68 | -0.75 | 3.5E-03 |
| Gpr165  | 242   | -1.59 | -0.67 | 1.2E-02 | -1.49 | -0.57 | 3.5E-02 |
| Gpr17   | 126   | -7.49 | -2.90 | 4.6E-21 | -6.79 | -2.76 | 4.2E-19 |
| Gpr180  | 1468  | 1.40  | 0.49  | 5.6E-09 | 1.38  | 0.46  | 3.8E-08 |
| Gpr21   | 504   | -4.20 | -2.07 | 6.5E-12 | -4.37 | -2.13 | 1.8E-12 |
| Gpr27   | 1524  | -1.63 | -0.71 | 1.1E-02 | -1.56 | -0.64 | 2.3E-02 |
| Gpr3    | 118   | 8.60  | 3.10  | 1.4E-40 | 12.12 | 3.60  | 3.2E-50 |
| Gpr35   | 178   | 3.29  | 1.72  | 1.0E-14 | 2.91  | 1.54  | 3.8E-12 |
| Gpr4    | 302   | 3.41  | 1.77  | 7.1E-31 | 3.56  | 1.83  | 8.0E-33 |
| Gpr45   | 762   | -1.90 | -0.93 | 3.8E-12 | -1.78 | -0.83 | 5.2E-10 |
| Gpr50   | 342   | 2.18  | 1.12  | 1.7E-05 | 1.56  | 0.64  | 1.9E-02 |
| Gpr88   | 221   | -2.28 | -1.19 | 3.7E-03 | -2.10 | -1.07 | 9.6E-03 |
| Gprc5a  | 115   | 1.85  | 0.89  | 3.1E-03 | 1.75  | 0.81  | 7.8E-03 |
| Gprin2  | 3251  | 1.58  | 0.66  | 1.9E-03 | 1.67  | 0.74  | 4.2E-04 |
| Gpsm1   | 8087  | -1.40 | -0.49 | 1.5E-04 | -1.48 | -0.57 | 7.8E-06 |
| Gpt     | 1344  | 1.71  | 0.78  | 1.5E-07 | 1.64  | 0.71  | 2.0E-06 |
| Gpt2    | 4155  | 1.87  | 0.91  | 3.4E-42 | 1.80  | 0.84  | 1.0E-36 |
| Gpx7    | 796   | -2.06 | -1.04 | 1.7E-05 | -2.19 | -1.13 | 2.8E-06 |
| Gramd1a | 13884 | -1.45 | -0.54 | 2.0E-05 | -1.46 | -0.54 | 1.8E-05 |
| Gramd1c | 308   | -1.75 | -0.81 | 2.0E-06 | -1.71 | -0.77 | 6.8E-06 |
| Gramd2  | 314   | 2.60  | 1.38  | 1.8E-05 | 2.76  | 1.47  | 4.8E-06 |
| Gramd3  | 1346  | 1.66  | 0.73  | 2.8E-05 | 1.69  | 0.76  | 1.4E-05 |
| Gramd4  | 4172  | -1.25 | -0.32 | 1.7E-02 | -1.29 | -0.37 | 5.3E-03 |
| Grap2   | 239   | -2.41 | -1.27 | 2.8E-03 | -2.39 | -1.25 | 3.3E-03 |
| Grb10   | 45862 | -1.51 | -0.59 | 5.4E-03 | -1.49 | -0.58 | 6.7E-03 |
| Grb14   | 635   | 1.47  | 0.55  | 2.9E-03 | 1.68  | 0.75  | 4.1E-05 |
| Grb2    | 9573  | 1.44  | 0.53  | 5.9E-08 | 1.37  | 0.46  | 3.4E-06 |
| Grcc10  | 360   | -1.82 | -0.86 | 1.6E-13 | -1.80 | -0.85 | 3.3E-13 |
| Grem2   | 471   | -2.21 | -1.14 | 6.5E-04 | -1.76 | -0.81 | 1.9E-02 |
| Grhl1   | 214   | 1.92  | 0.94  | 2.5E-03 | 1.97  | 0.98  | 1.7E-03 |

|          |       |       |       |         |       |       |         |
|----------|-------|-------|-------|---------|-------|-------|---------|
| Grhpr    | 879   | 1.38  | 0.46  | 3.4E-03 | 1.30  | 0.38  | 1.7E-02 |
| Grid2ip  | 169   | 2.70  | 1.43  | 6.3E-24 | 3.40  | 1.76  | 1.4E-34 |
| Grik4    | 520   | -1.44 | -0.53 | 1.2E-03 | -1.38 | -0.47 | 4.7E-03 |
| Grik5    | 7313  | -1.31 | -0.39 | 2.2E-02 | -1.40 | -0.49 | 3.6E-03 |
| Grin2a   | 270   | -2.28 | -1.19 | 1.5E-08 | -2.27 | -1.18 | 2.0E-08 |
| Grk1     | 127   | 6.57  | 2.72  | 2.6E-52 | 7.74  | 2.95  | 6.3E-57 |
| Grk2     | 4821  | -1.39 | -0.48 | 4.8E-06 | -1.50 | -0.58 | 1.5E-08 |
| Grk5     | 2884  | 1.76  | 0.81  | 2.1E-52 | 1.79  | 0.84  | 9.1E-56 |
| Grk6     | 6916  | 1.34  | 0.42  | 3.6E-04 | 1.25  | 0.32  | 7.9E-03 |
| Grm2     | 321   | -1.39 | -0.47 | 2.8E-02 | -1.49 | -0.57 | 7.1E-03 |
| Grm3     | 394   | -1.84 | -0.88 | 2.7E-03 | -1.59 | -0.67 | 2.7E-02 |
| Grn      | 4795  | 1.71  | 0.77  | 8.7E-09 | 1.61  | 0.69  | 3.9E-07 |
| Grpel1   | 3863  | 1.42  | 0.51  | 1.0E-05 | 1.39  | 0.48  | 3.6E-05 |
| Grtp1    | 1292  | 2.34  | 1.22  | 6.8E-57 | 2.28  | 1.19  | 8.5E-54 |
| Gsap     | 411   | -2.09 | -1.07 | 1.1E-05 | -1.84 | -0.88 | 3.5E-04 |
| Gsdmd    | 232   | -2.82 | -1.49 | 1.4E-23 | -2.57 | -1.36 | 1.3E-19 |
| Gsdme    | 636   | -2.27 | -1.19 | 1.8E-24 | -2.23 | -1.16 | 2.1E-23 |
| Gse1     | 7420  | -1.26 | -0.34 | 4.5E-02 | -1.36 | -0.44 | 7.4E-03 |
| Gspt2    | 1761  | 1.39  | 0.47  | 2.3E-07 | 1.36  | 0.44  | 1.6E-06 |
| Gsr      | 1705  | -1.55 | -0.63 | 5.0E-08 | -1.64 | -0.71 | 7.0E-10 |
| Gsta4    | 2086  | 2.41  | 1.27  | 1.7E-10 | 2.19  | 1.13  | 1.4E-08 |
| Gstk1    | 486   | 1.46  | 0.54  | 9.9E-05 | 1.61  | 0.69  | 5.3E-07 |
| Gsto1    | 1957  | 1.60  | 0.68  | 4.5E-21 | 1.57  | 0.65  | 4.3E-19 |
| Gstt1    | 316   | 1.80  | 0.84  | 5.0E-06 | 1.62  | 0.70  | 1.9E-04 |
| Gstt2    | 285   | 1.88  | 0.91  | 1.8E-08 | 1.62  | 0.70  | 2.1E-05 |
| Gstt3    | 130   | 2.88  | 1.53  | 1.2E-03 | 2.60  | 1.38  | 3.7E-03 |
| Gstz1    | 2191  | -1.43 | -0.52 | 3.4E-13 | -1.39 | -0.48 | 2.6E-11 |
| Gsx1     | 239   | -2.00 | -1.00 | 7.3E-04 | -2.44 | -1.29 | 1.0E-05 |
| Gtf2a1   | 4806  | -1.42 | -0.51 | 1.0E-03 | -1.64 | -0.71 | 2.7E-06 |
| Gtf2e2   | 5060  | 1.57  | 0.65  | 1.3E-17 | 1.58  | 0.66  | 5.0E-18 |
| Gtf2f2   | 2453  | 1.52  | 0.61  | 1.9E-09 | 1.54  | 0.63  | 5.5E-10 |
| Gtf2h1   | 4471  | 1.24  | 0.31  | 6.4E-04 | 1.25  | 0.32  | 4.0E-04 |
| Gtf2h2   | 2883  | -1.28 | -0.36 | 1.4E-05 | -1.30 | -0.38 | 4.2E-06 |
| Gtf2i    | 23958 | -2.36 | -1.24 | 1.2E-34 | -2.54 | -1.35 | 8.0E-41 |
| Gtf2ird1 | 4286  | -1.54 | -0.62 | 5.8E-18 | -1.67 | -0.74 | 1.1E-24 |
| Gtf2ird2 | 1253  | -2.52 | -1.33 | 7.4E-30 | -2.63 | -1.40 | 1.1E-32 |
| Gtf3c3   | 3562  | -1.90 | -0.93 | 1.3E-31 | -1.85 | -0.89 | 4.4E-29 |
| Gtf3c4   | 12558 | 1.31  | 0.39  | 7.5E-07 | 1.37  | 0.46  | 5.2E-09 |
| Gtf3c5   | 3162  | -2.05 | -1.03 | 2.9E-32 | -2.17 | -1.12 | 2.4E-37 |
| Gtf3c6   | 3797  | -2.77 | -1.47 | 7.5E-40 | -2.96 | -1.57 | 2.8E-45 |
| Gtpbp1   | 6758  | 1.33  | 0.41  | 2.1E-09 | 1.22  | 0.29  | 3.2E-05 |
| Gtpbp10  | 2227  | -1.28 | -0.36 | 8.1E-04 | -1.30 | -0.38 | 3.6E-04 |
| Gtpbp3   | 2274  | 2.13  | 1.09  | 1.1E-20 | 1.92  | 0.94  | 1.2E-15 |
| Gtpbp8   | 2089  | -1.39 | -0.48 | 1.3E-07 | -1.36 | -0.45 | 7.8E-07 |
| Gucy1b1  | 2626  | 2.27  | 1.18  | 5.9E-13 | 2.44  | 1.28  | 4.3E-15 |
| Gucy1b2  | 147   | -2.85 | -1.51 | 1.0E-07 | -2.64 | -1.40 | 1.0E-06 |
| Guf1     | 7414  | -1.39 | -0.47 | 1.2E-09 | -1.27 | -0.34 | 1.5E-05 |



|        |        |       |       |          |       |       |          |
|--------|--------|-------|-------|----------|-------|-------|----------|
| Gulp1  | 2021   | -1.45 | -0.53 | 1.4E-02  | -1.46 | -0.55 | 1.2E-02  |
| Gusb   | 1547   | -1.38 | -0.46 | 7.6E-04  | -1.43 | -0.52 | 1.5E-04  |
| Gxylt1 | 7302   | 1.48  | 0.57  | 2.0E-07  | 1.55  | 0.63  | 8.2E-09  |
| Gypc   | 922    | -2.16 | -1.11 | 8.9E-08  | -2.21 | -1.14 | 3.7E-08  |
| Gzf1   | 4642   | 1.56  | 0.64  | 4.8E-14  | 1.56  | 0.64  | 8.2E-14  |
| Gzmm   | 159    | 2.08  | 1.06  | 2.3E-13  | 1.99  | 1.00  | 5.4E-12  |
| H1f0   | 57016  | 3.20  | 1.68  | 1.7E-28  | 2.83  | 1.50  | 5.8E-23  |
| H1f10  | 4974   | 1.70  | 0.77  | 2.0E-05  | 1.45  | 0.53  | 3.9E-03  |
| H1f2   | 993    | 3.77  | 1.91  | 2.1E-31  | 4.02  | 2.01  | 2.3E-34  |
| H2-Ab1 | 245    | 17.04 | 4.09  | 1.2E-73  | 13.41 | 3.75  | 4.0E-63  |
| H2ac10 | 154    | -1.57 | -0.65 | 9.6E-03  | -1.67 | -0.74 | 3.2E-03  |
| H2aj   | 2580   | 1.93  | 0.95  | 9.2E-18  | 1.75  | 0.81  | 3.1E-13  |
| H2bc6  | 131    | 2.08  | 1.06  | 5.7E-12  | 1.99  | 0.99  | 9.6E-11  |
| H2bu2  | 3332   | -1.35 | -0.43 | 1.4E-03  | -1.33 | -0.41 | 2.7E-03  |
| H2-D1  | 2189   | 3.05  | 1.61  | 5.7E-53  | 2.71  | 1.44  | 2.2E-42  |
| H2-DMa | 345    | 2.02  | 1.01  | 2.1E-30  | 1.92  | 0.94  | 6.9E-26  |
| H2-K1  | 1897   | 5.53  | 2.47  | 1.4E-29  | 4.36  | 2.12  | 3.1E-22  |
| H2-M5  | 875    | -1.67 | -0.74 | 1.4E-04  | -1.69 | -0.76 | 8.3E-05  |
| H2-Q4  | 756    | 3.41  | 1.77  | 3.7E-18  | 2.61  | 1.38  | 1.8E-11  |
| H2-Q6  | 102    | 12.35 | 3.63  | 1.1E-43  | 7.20  | 2.85  | 1.1E-30  |
| H2-Q7  | 283    | 3.27  | 1.71  | 3.3E-13  | 2.63  | 1.40  | 3.5E-09  |
| H2-T23 | 263    | -1.29 | -0.36 | 3.2E-02  | -1.31 | -0.39 | 2.1E-02  |
| H3f3b  | 103547 | 1.44  | 0.53  | 3.5E-13  | 1.43  | 0.51  | 1.9E-12  |
| H60b   | 205    | 2.00  | 1.00  | 1.5E-05  | 2.09  | 1.07  | 4.1E-06  |
| H6pd   | 838    | -1.60 | -0.68 | 3.9E-03  | -1.68 | -0.75 | 1.4E-03  |
| Habp4  | 3625   | 2.54  | 1.34  | 4.3E-40  | 2.51  | 1.33  | 4.3E-39  |
| Hacd1  | 399    | -2.20 | -1.14 | 5.1E-16  | -2.02 | -1.01 | 6.5E-13  |
| Hacd2  | 1259   | 1.75  | 0.81  | 1.3E-31  | 1.52  | 0.60  | 3.5E-18  |
| Hadh   | 4271   | 1.88  | 0.91  | 1.5E-08  | 1.80  | 0.84  | 1.9E-07  |
| Hadha  | 10854  | 1.47  | 0.55  | 1.6E-09  | 1.45  | 0.54  | 5.1E-09  |
| Hadhb  | 4314   | 1.64  | 0.72  | 2.3E-08  | 1.65  | 0.72  | 1.9E-08  |
| Hagh   | 1445   | 2.73  | 1.45  | 1.7E-84  | 2.72  | 1.44  | 1.9E-83  |
| Hap1   | 12514  | 1.96  | 0.97  | 2.8E-08  | 1.72  | 0.78  | 1.1E-05  |
| Hapln1 | 1964   | -4.31 | -2.11 | 1.6E-05  | -3.45 | -1.79 | 3.0E-04  |
| Hapln4 | 275    | 27.66 | 4.79  | 3.9E-126 | 23.71 | 4.57  | 2.8E-119 |
| Has2   | 670    | -2.71 | -1.44 | 1.9E-07  | -2.01 | -1.01 | 3.6E-04  |
| Haspin | 987    | 1.46  | 0.54  | 1.2E-03  | 1.38  | 0.46  | 6.6E-03  |
| Hat1   | 8050   | 1.38  | 0.47  | 4.1E-03  | 1.32  | 0.40  | 1.6E-02  |
| Haus3  | 2447   | 1.30  | 0.38  | 5.2E-03  | 1.27  | 0.35  | 1.1E-02  |
| Haus6  | 6494   | 1.41  | 0.49  | 3.9E-04  | 1.34  | 0.42  | 3.1E-03  |
| Hax1   | 3290   | -1.22 | -0.29 | 5.4E-04  | -1.29 | -0.37 | 1.0E-05  |
| Hbegf  | 484    | 1.45  | 0.53  | 3.9E-04  | 1.37  | 0.46  | 2.7E-03  |
| Hbp1   | 6532   | -1.41 | -0.50 | 1.1E-08  | -1.34 | -0.42 | 1.8E-06  |
| Hccs   | 2971   | 1.30  | 0.38  | 1.0E-05  | 1.30  | 0.38  | 1.1E-05  |
| Hcfc1  | 17725  | -2.30 | -1.20 | 2.7E-29  | -2.29 | -1.20 | 4.5E-29  |
| Hcls1  | 187    | -1.39 | -0.48 | 7.2E-03  | -1.65 | -0.72 | 3.2E-05  |
| Hcn2   | 509    | 4.94  | 2.30  | 1.9E-20  | 4.59  | 2.20  | 1.0E-18  |

|         |       |       |       |         |       |       |         |
|---------|-------|-------|-------|---------|-------|-------|---------|
| Hcn3    | 2701  | 2.06  | 1.04  | 1.5E-07 | 1.98  | 0.99  | 6.8E-07 |
| Hdac1   | 12630 | 1.67  | 0.74  | 3.1E-11 | 1.53  | 0.61  | 5.4E-08 |
| Hdac10  | 1291  | -1.29 | -0.37 | 7.8E-07 | -1.28 | -0.35 | 2.2E-06 |
| Hdac11  | 4312  | 1.46  | 0.54  | 5.7E-08 | 1.49  | 0.57  | 9.5E-09 |
| Hdac3   | 9789  | 1.27  | 0.34  | 1.1E-08 | 1.19  | 0.25  | 3.6E-05 |
| Hdac5   | 8709  | 1.59  | 0.67  | 4.5E-09 | 1.52  | 0.61  | 1.4E-07 |
| Hdac6   | 10541 | 1.56  | 0.64  | 1.2E-15 | 1.43  | 0.52  | 1.7E-10 |
| Hdac7   | 4354  | -2.07 | -1.05 | 5.5E-18 | -2.11 | -1.07 | 8.5E-19 |
| Hdac9   | 1503  | -1.37 | -0.46 | 2.9E-11 | -1.28 | -0.36 | 2.2E-07 |
| Hddc3   | 865   | -1.48 | -0.57 | 3.4E-12 | -1.47 | -0.56 | 9.2E-12 |
| Hdgfl2  | 10422 | 1.68  | 0.74  | 2.0E-09 | 1.51  | 0.59  | 2.5E-06 |
| Hdgfl3  | 17974 | -1.70 | -0.77 | 8.9E-07 | -1.64 | -0.71 | 5.7E-06 |
| Hdhd3   | 360   | 1.90  | 0.93  | 5.1E-14 | 1.79  | 0.84  | 1.2E-11 |
| Hdhd5   | 1737  | 1.38  | 0.47  | 1.5E-17 | 1.37  | 0.45  | 2.7E-16 |
| Hdlbp   | 25696 | -1.29 | -0.37 | 9.1E-03 | -1.25 | -0.32 | 2.5E-02 |
| Hdx     | 1392  | -1.61 | -0.69 | 1.4E-07 | -1.37 | -0.45 | 7.0E-04 |
| Heatr1  | 8066  | 1.48  | 0.57  | 4.6E-05 | 1.59  | 0.67  | 1.2E-06 |
| Heatr5a | 4914  | 1.31  | 0.39  | 8.5E-04 | 1.38  | 0.46  | 5.2E-05 |
| Heatr5b | 5065  | 1.23  | 0.30  | 1.9E-02 | 1.33  | 0.41  | 1.2E-03 |
| Heatr6  | 3708  | -1.59 | -0.67 | 5.8E-16 | -1.62 | -0.69 | 6.4E-17 |
| Hebp1   | 408   | 1.58  | 0.66  | 1.8E-03 | 1.47  | 0.56  | 9.6E-03 |
| Heca    | 4999  | 1.57  | 0.65  | 1.5E-10 | 1.55  | 0.63  | 7.3E-10 |
| Hectd1  | 13159 | -2.01 | -1.01 | 1.5E-13 | -1.74 | -0.80 | 6.0E-09 |
| Hectd3  | 5325  | 1.91  | 0.93  | 5.9E-29 | 1.88  | 0.91  | 2.4E-27 |
| Hecw1   | 4482  | -2.00 | -1.00 | 2.2E-03 | -1.70 | -0.76 | 2.3E-02 |
| Hecw2   | 1165  | -2.41 | -1.27 | 4.0E-22 | -2.08 | -1.05 | 1.7E-15 |
| Heg1    | 5703  | -1.59 | -0.67 | 2.3E-05 | -1.72 | -0.78 | 6.5E-07 |
| Helb    | 1918  | 2.87  | 1.52  | 1.7E-93 | 2.79  | 1.48  | 2.9E-88 |
| Helq    | 2316  | 1.33  | 0.41  | 1.2E-09 | 1.34  | 0.42  | 7.6E-10 |
| Helz    | 6671  | 1.25  | 0.32  | 8.3E-04 | 1.29  | 0.36  | 1.3E-04 |
| Hemk1   | 1325  | -1.48 | -0.57 | 4.2E-08 | -1.41 | -0.50 | 1.9E-06 |
| Herc3   | 3540  | 1.81  | 0.85  | 6.3E-13 | 1.89  | 0.92  | 8.5E-15 |
| Herc6   | 176   | -1.28 | -0.36 | 2.0E-02 | -1.30 | -0.38 | 1.3E-02 |
| Hes1    | 1561  | -1.52 | -0.60 | 3.5E-06 | -1.70 | -0.77 | 2.6E-09 |
| Hes7    | 133   | 15.80 | 3.98  | 1.4E-59 | 12.83 | 3.68  | 2.3E-53 |
| Hexb    | 1597  | 1.36  | 0.44  | 5.3E-05 | 1.40  | 0.49  | 7.9E-06 |
| Hexim2  | 362   | -1.51 | -0.59 | 6.0E-05 | -1.52 | -0.60 | 4.7E-05 |
| Heyl    | 818   | -1.59 | -0.67 | 7.4E-05 | -1.61 | -0.69 | 4.4E-05 |
| Hfm1    | 1011  | -1.80 | -0.85 | 1.3E-11 | -1.50 | -0.58 | 4.4E-06 |
| Hgfac   | 114   | 1.56  | 0.64  | 3.3E-04 | 1.85  | 0.89  | 4.6E-07 |
| Hhat    | 198   | -4.83 | -2.27 | 1.3E-29 | -4.91 | -2.30 | 3.1E-30 |
| Hhipl1  | 540   | -1.95 | -0.96 | 1.2E-06 | -2.28 | -1.19 | 1.5E-09 |
| Hhipl2  | 159   | 3.25  | 1.70  | 6.5E-22 | 3.83  | 1.94  | 1.1E-27 |
| Hibadh  | 2808  | 1.33  | 0.41  | 5.1E-10 | 1.33  | 0.41  | 7.2E-10 |
| Hibch   | 2245  | 1.36  | 0.45  | 1.9E-14 | 1.45  | 0.53  | 4.5E-20 |
| Hic1    | 634   | -3.80 | -1.93 | 1.5E-08 | -3.26 | -1.70 | 6.6E-07 |
| Hid1    | 4424  | 2.44  | 1.29  | 4.4E-34 | 2.21  | 1.14  | 4.9E-27 |

|           |        |       |       |         |       |       |         |
|-----------|--------|-------|-------|---------|-------|-------|---------|
| Hif1a     | 12695  | -1.47 | -0.55 | 1.9E-15 | -1.47 | -0.55 | 2.7E-15 |
| Hif3a     | 2892   | 1.31  | 0.39  | 1.4E-04 | 1.39  | 0.48  | 2.9E-06 |
| Higd1a    | 3706   | 1.48  | 0.56  | 2.2E-10 | 1.43  | 0.52  | 7.1E-09 |
| Hinfp     | 4876   | 1.51  | 0.59  | 4.6E-08 | 1.61  | 0.69  | 1.6E-10 |
| Hint3     | 411    | -1.62 | -0.70 | 7.2E-06 | -1.57 | -0.65 | 3.4E-05 |
| Hip1r     | 3544   | 2.26  | 1.18  | 4.8E-18 | 2.31  | 1.21  | 6.6E-19 |
| Hipk1     | 11888  | 1.27  | 0.35  | 9.8E-06 | 1.30  | 0.38  | 1.4E-06 |
| Hipk3     | 3357   | -2.01 | -1.01 | 1.4E-18 | -1.88 | -0.91 | 2.9E-15 |
| Hirip3    | 5800   | -2.09 | -1.06 | 9.5E-10 | -2.44 | -1.29 | 8.1E-14 |
| Hivep1    | 7862   | 1.29  | 0.37  | 3.0E-03 | 1.35  | 0.43  | 4.7E-04 |
| Hjurp     | 22332  | -1.52 | -0.61 | 1.0E-14 | -1.46 | -0.55 | 3.3E-12 |
| Hk1       | 8782   | 1.89  | 0.92  | 5.8E-18 | 1.85  | 0.89  | 5.1E-17 |
| Hk2       | 3714   | 2.13  | 1.09  | 1.5E-12 | 1.93  | 0.95  | 1.1E-09 |
| Hlf       | 1314   | 1.69  | 0.76  | 1.5E-13 | 1.61  | 0.68  | 2.7E-11 |
| Hltf      | 4546   | 1.28  | 0.36  | 8.3E-07 | 1.36  | 0.44  | 6.8E-10 |
| Hmbox1    | 6274   | -1.35 | -0.43 | 9.4E-08 | -1.29 | -0.36 | 9.1E-06 |
| Hmbs      | 1550   | -1.94 | -0.95 | 1.4E-06 | -2.12 | -1.08 | 3.4E-08 |
| Hmces     | 1681   | 1.31  | 0.39  | 5.1E-07 | 1.16  | 0.22  | 7.1E-03 |
| Hmg20a    | 6866   | -1.82 | -0.87 | 3.0E-61 | -1.77 | -0.83 | 6.9E-56 |
| Hmg20b    | 3967   | 1.66  | 0.73  | 2.1E-06 | 1.52  | 0.60  | 1.1E-04 |
| Hmgb1     | 26362  | -1.34 | -0.43 | 4.7E-03 | -1.44 | -0.52 | 4.7E-04 |
| Hmgb2     | 24394  | -1.43 | -0.52 | 1.3E-02 | -1.62 | -0.69 | 7.5E-04 |
| Hmgb3     | 18826  | -1.41 | -0.50 | 3.7E-04 | -1.60 | -0.68 | 9.1E-07 |
| Hmgcl     | 2057   | 2.00  | 1.00  | 7.4E-38 | 1.85  | 0.89  | 6.3E-30 |
| Hmgcll1   | 1224   | -2.45 | -1.29 | 1.6E-23 | -2.48 | -1.31 | 4.2E-24 |
| Hmgcs2    | 417    | -2.10 | -1.07 | 1.6E-04 | -1.80 | -0.85 | 3.3E-03 |
| Hmgn2     | 31781  | -1.38 | -0.46 | 1.0E-03 | -1.56 | -0.64 | 4.3E-06 |
| Hmgn3     | 4436   | 1.56  | 0.64  | 2.0E-10 | 1.50  | 0.58  | 7.0E-09 |
| Hmgxb4    | 4217   | -1.80 | -0.84 | 3.7E-29 | -1.85 | -0.88 | 6.7E-32 |
| Hmox1     | 1128   | 1.40  | 0.49  | 5.2E-03 | 1.37  | 0.46  | 9.3E-03 |
| Hmx2      | 110    | -1.63 | -0.70 | 5.9E-04 | -1.53 | -0.62 | 3.1E-03 |
| Hnrnpa2b1 | 162044 | -1.26 | -0.33 | 5.7E-03 | -1.36 | -0.45 | 1.3E-04 |
| Hnrnpab   | 47049  | -1.53 | -0.61 | 2.7E-05 | -1.75 | -0.81 | 1.5E-08 |
| Hnrnpb1   | 93936  | -1.60 | -0.68 | 9.0E-14 | -1.61 | -0.68 | 5.2E-14 |
| Hnrnpb3   | 14582  | -1.34 | -0.42 | 4.3E-03 | -1.53 | -0.62 | 1.8E-05 |
| Hnrnpk    | 69304  | -1.30 | -0.38 | 9.0E-05 | -1.36 | -0.45 | 3.4E-06 |
| Hnrnpl    | 25633  | -1.47 | -0.56 | 9.6E-09 | -1.61 | -0.68 | 1.2E-12 |
| Hnrnp1l   | 11084  | -1.45 | -0.54 | 5.3E-09 | -1.50 | -0.59 | 1.4E-10 |
| Hnrnplm   | 33103  | -1.43 | -0.52 | 6.8E-05 | -1.62 | -0.69 | 5.7E-08 |
| Hnrnp1r   | 28816  | -1.23 | -0.29 | 1.6E-03 | -1.26 | -0.34 | 2.7E-04 |
| Hnrnp1u   | 3018   | -1.59 | -0.67 | 3.3E-04 | -1.59 | -0.67 | 3.4E-04 |
| Hnrnp1u1  | 16418  | -1.25 | -0.32 | 3.5E-04 | -1.34 | -0.42 | 1.6E-06 |
| Homer1    | 5300   | 1.61  | 0.69  | 9.6E-20 | 1.63  | 0.71  | 7.6E-21 |
| Homer3    | 3874   | -1.27 | -0.35 | 1.0E-02 | -1.43 | -0.51 | 9.4E-05 |
| Homez     | 1824   | 1.89  | 0.92  | 1.5E-51 | 1.70  | 0.77  | 5.8E-36 |
| Hook1     | 8347   | 1.27  | 0.34  | 6.6E-03 | 1.43  | 0.52  | 2.3E-05 |
| Hook2     | 1648   | 1.25  | 0.33  | 3.9E-03 | 1.19  | 0.26  | 2.7E-02 |

|          |       |       |       |         |       |       |         |
|----------|-------|-------|-------|---------|-------|-------|---------|
| Hp1bp3   | 20976 | -1.82 | -0.86 | 8.3E-50 | -1.88 | -0.91 | 3.2E-55 |
| Hpcal1   | 1994  | 1.74  | 0.80  | 9.1E-29 | 1.79  | 0.84  | 2.5E-31 |
| Hpgds    | 611   | -1.44 | -0.52 | 1.8E-03 | -1.33 | -0.41 | 1.8E-02 |
| Hps1     | 1466  | -1.36 | -0.45 | 1.8E-05 | -1.44 | -0.53 | 3.7E-07 |
| Hps3     | 2160  | 1.39  | 0.48  | 5.0E-09 | 1.44  | 0.53  | 9.8E-11 |
| Hps4     | 2656  | 1.34  | 0.43  | 2.4E-06 | 1.34  | 0.43  | 2.5E-06 |
| Hps6     | 307   | 2.52  | 1.33  | 7.4E-15 | 2.41  | 1.27  | 1.7E-13 |
| Hrh1     | 125   | 12.12 | 3.60  | 1.8E-67 | 13.08 | 3.71  | 4.0E-67 |
| Hrh3     | 823   | 2.58  | 1.37  | 5.1E-15 | 2.34  | 1.23  | 2.6E-12 |
| Hs1bp3   | 1314  | 1.47  | 0.56  | 9.1E-07 | 1.41  | 0.49  | 1.9E-05 |
| Hs2st1   | 12086 | 1.56  | 0.64  | 2.4E-17 | 1.47  | 0.56  | 2.2E-13 |
| Hs3st3a1 | 299   | -1.68 | -0.75 | 1.0E-02 | -1.70 | -0.76 | 9.7E-03 |
| Hs6st1   | 7939  | 1.60  | 0.68  | 1.0E-07 | 1.48  | 0.56  | 1.4E-05 |
| Hs6st2   | 2902  | -1.33 | -0.41 | 3.6E-03 | -1.36 | -0.44 | 1.6E-03 |
| Hscb     | 393   | 1.64  | 0.71  | 1.4E-08 | 1.48  | 0.57  | 7.9E-06 |
| Hsd17b11 | 777   | -1.30 | -0.37 | 8.4E-03 | -1.36 | -0.45 | 1.5E-03 |
| Hsd17b7  | 3103  | 1.90  | 0.93  | 6.8E-16 | 1.94  | 0.96  | 7.5E-17 |
| Hsd11    | 7041  | 1.38  | 0.46  | 5.2E-05 | 1.32  | 0.41  | 4.4E-04 |
| Hsd12    | 3424  | 2.16  | 1.11  | 6.0E-73 | 2.31  | 1.21  | 2.4E-86 |
| Hspa12b  | 1268  | -2.05 | -1.04 | 2.3E-06 | -2.16 | -1.11 | 4.2E-07 |
| Hspa14   | 3991  | 1.65  | 0.72  | 2.6E-10 | 1.54  | 0.62  | 5.6E-08 |
| Hspa1a   | 235   | 6.27  | 2.65  | 1.4E-31 | 5.59  | 2.48  | 6.7E-28 |
| Hspa1b   | 412   | 5.93  | 2.57  | 3.1E-35 | 5.20  | 2.38  | 1.9E-30 |
| Hspa2    | 996   | 6.34  | 2.66  | 1.0E-96 | 6.09  | 2.61  | 1.8E-92 |
| Hspa4    | 35409 | 1.28  | 0.35  | 8.5E-07 | 1.24  | 0.31  | 1.6E-05 |
| Hspbap1  | 1511  | 1.91  | 0.93  | 6.4E-44 | 1.80  | 0.85  | 1.0E-36 |
| Hspbp1   | 1929  | -1.19 | -0.25 | 3.6E-03 | -1.27 | -0.35 | 3.4E-05 |
| Hsph1    | 17576 | 1.48  | 0.56  | 1.2E-13 | 1.41  | 0.50  | 6.5E-11 |
| Htr2a    | 167   | -1.63 | -0.70 | 9.8E-04 | -1.59 | -0.67 | 1.8E-03 |
| Htra2    | 2586  | 1.64  | 0.72  | 8.4E-15 | 1.48  | 0.57  | 1.1E-09 |
| Hunk     | 4047  | -1.60 | -0.68 | 3.0E-12 | -1.72 | -0.78 | 5.3E-16 |
| Hvcn1    | 308   | -3.11 | -1.64 | 7.2E-13 | -3.41 | -1.77 | 7.8E-15 |
| Hyal1    | 396   | 1.50  | 0.58  | 6.6E-05 | 1.28  | 0.36  | 1.7E-02 |
| Hykk     | 1143  | 1.83  | 0.87  | 4.0E-14 | 1.82  | 0.87  | 4.9E-14 |
| Hyou1    | 13989 | 1.52  | 0.60  | 2.3E-10 | 1.45  | 0.53  | 2.4E-08 |
| Hypk     | 437   | 1.72  | 0.78  | 1.4E-14 | 1.71  | 0.78  | 3.3E-14 |
| Iba57    | 547   | -2.57 | -1.36 | 2.7E-23 | -2.68 | -1.42 | 3.0E-25 |
| Ibsp     | 120   | -8.11 | -3.02 | 2.3E-02 | -7.07 | -2.82 | 3.6E-02 |
| Ibtk     | 6460  | -1.63 | -0.71 | 2.9E-33 | -1.60 | -0.67 | 3.8E-30 |
| Ica1     | 848   | -1.41 | -0.49 | 2.3E-04 | -1.30 | -0.38 | 5.0E-03 |
| Ica1l    | 573   | -2.37 | -1.25 | 1.1E-03 | -2.19 | -1.13 | 3.3E-03 |
| Icam2    | 259   | -2.22 | -1.15 | 1.1E-10 | -2.23 | -1.16 | 7.9E-11 |
| Icam5    | 104   | 16.47 | 4.04  | 6.4E-39 | 16.73 | 4.06  | 3.0E-37 |
| Ice2     | 2118  | -1.69 | -0.76 | 1.2E-11 | -1.47 | -0.56 | 8.2E-07 |
| Icmt     | 4406  | 1.33  | 0.41  | 1.3E-08 | 1.30  | 0.38  | 1.6E-07 |
| Icosl    | 192   | 1.48  | 0.57  | 9.5E-03 | 1.45  | 0.54  | 1.4E-02 |
| Id2      | 3994  | -1.42 | -0.51 | 1.7E-03 | -1.33 | -0.41 | 1.2E-02 |

|         |       |       |       |         |       |       |         |
|---------|-------|-------|-------|---------|-------|-------|---------|
| ld3     | 3101  | -1.50 | -0.58 | 4.0E-02 | -1.76 | -0.82 | 3.3E-03 |
| ld4     | 21596 | -1.43 | -0.52 | 3.5E-02 | -1.49 | -0.58 | 1.8E-02 |
| ldh2    | 9459  | -1.21 | -0.27 | 2.6E-03 | -1.29 | -0.37 | 3.2E-05 |
| ldh3a   | 7492  | 1.95  | 0.96  | 7.7E-63 | 1.87  | 0.90  | 4.7E-55 |
| ldh3g   | 5378  | -1.25 | -0.32 | 1.0E-06 | -1.28 | -0.36 | 2.1E-08 |
| ldi1    | 5613  | 1.48  | 0.56  | 3.6E-03 | 1.34  | 0.42  | 3.4E-02 |
| ldnk    | 2715  | 2.11  | 1.08  | 3.9E-38 | 2.02  | 1.02  | 3.9E-34 |
| ldua    | 719   | -1.59 | -0.67 | 9.4E-12 | -1.74 | -0.80 | 3.1E-16 |
| ler2    | 1311  | 1.69  | 0.76  | 8.4E-07 | 1.61  | 0.69  | 9.0E-06 |
| ler3    | 242   | 2.27  | 1.18  | 2.6E-17 | 2.36  | 1.24  | 6.6E-19 |
| ler3ip1 | 3017  | 1.24  | 0.31  | 6.8E-04 | 1.29  | 0.36  | 7.1E-05 |
| ler5    | 3457  | 1.29  | 0.36  | 5.8E-03 | 1.21  | 0.28  | 4.0E-02 |
| lffo1   | 2039  | 1.39  | 0.47  | 8.9E-05 | 1.29  | 0.37  | 3.2E-03 |
| lffo2   | 1872  | 1.96  | 0.97  | 1.8E-17 | 1.89  | 0.92  | 1.1E-15 |
| lfi27   | 240   | -2.18 | -1.12 | 8.8E-05 | -2.21 | -1.14 | 6.5E-05 |
| lfit2   | 673   | -1.91 | -0.93 | 9.0E-14 | -1.89 | -0.91 | 2.5E-13 |
| lfitm1  | 167   | -1.64 | -0.72 | 1.6E-02 | -1.54 | -0.63 | 3.8E-02 |
| lfnar2  | 657   | -2.25 | -1.17 | 9.4E-56 | -2.45 | -1.30 | 4.4E-67 |
| lfngr1  | 1370  | 1.49  | 0.58  | 2.2E-06 | 1.43  | 0.51  | 3.2E-05 |
| lfngr2  | 2471  | 1.40  | 0.48  | 2.6E-08 | 1.39  | 0.47  | 5.9E-08 |
| lfrd1   | 4234  | 1.27  | 0.35  | 2.9E-03 | 1.20  | 0.26  | 2.7E-02 |
| lft122  | 2446  | -1.72 | -0.78 | 5.9E-67 | -1.69 | -0.76 | 2.2E-62 |
| lft140  | 5845  | 1.69  | 0.76  | 1.8E-25 | 1.71  | 0.78  | 1.4E-26 |
| lft20   | 3147  | 1.53  | 0.61  | 1.1E-28 | 1.49  | 0.57  | 3.6E-25 |
| lft22   | 2643  | 1.41  | 0.50  | 3.1E-13 | 1.30  | 0.38  | 2.9E-08 |
| lft27   | 2598  | 1.60  | 0.68  | 1.0E-09 | 1.41  | 0.50  | 1.0E-05 |
| lft52   | 2607  | -1.36 | -0.44 | 2.2E-07 | -1.45 | -0.54 | 2.7E-10 |
| lft57   | 2127  | 1.82  | 0.86  | 8.1E-56 | 1.81  | 0.85  | 1.3E-54 |
| lft80   | 4843  | 1.51  | 0.59  | 5.6E-13 | 1.63  | 0.70  | 6.9E-18 |
| lgdcc4  | 4547  | -1.87 | -0.90 | 4.1E-16 | -1.81 | -0.86 | 1.7E-14 |
| lgf1    | 2781  | -3.30 | -1.72 | 8.9E-04 | -3.18 | -1.67 | 1.3E-03 |
| lgf2    | 1793  | -2.59 | -1.37 | 1.7E-03 | -2.82 | -1.50 | 6.0E-04 |
| lgf2bp2 | 7288  | -1.42 | -0.51 | 7.5E-04 | -1.59 | -0.67 | 6.5E-06 |
| lgf2r   | 18313 | 1.42  | 0.51  | 2.4E-03 | 1.64  | 0.72  | 1.4E-05 |
| lgfbp3  | 1355  | -2.79 | -1.48 | 6.3E-05 | -2.34 | -1.23 | 1.1E-03 |
| lgfbp5  | 21794 | -2.57 | -1.36 | 5.4E-09 | -2.37 | -1.24 | 1.2E-07 |
| lghmbp2 | 1000  | -1.70 | -0.76 | 1.7E-15 | -1.80 | -0.85 | 8.5E-19 |
| lgsf3   | 10994 | 1.44  | 0.52  | 1.8E-05 | 1.51  | 0.60  | 9.0E-07 |
| lgsf8   | 7797  | 1.67  | 0.74  | 5.1E-07 | 1.59  | 0.67  | 7.6E-06 |
| lgsf9b  | 7558  | 1.92  | 0.94  | 1.2E-09 | 1.97  | 0.98  | 2.5E-10 |
| lho1    | 199   | 1.40  | 0.49  | 1.0E-04 | 1.22  | 0.29  | 2.7E-02 |
| lkbip   | 2039  | 1.45  | 0.53  | 2.7E-04 | 1.58  | 0.66  | 4.7E-06 |
| lkbkb   | 7244  | 1.40  | 0.48  | 4.4E-14 | 1.45  | 0.54  | 5.9E-17 |
| lkbkg   | 3453  | -1.29 | -0.37 | 7.3E-05 | -1.22 | -0.29 | 2.3E-03 |
| lkzf1   | 271   | -1.58 | -0.66 | 1.5E-05 | -1.59 | -0.67 | 1.2E-05 |
| lkzf4   | 1884  | -1.58 | -0.66 | 3.7E-04 | -1.68 | -0.75 | 5.0E-05 |
| ll10rb  | 191   | -1.99 | -0.99 | 1.2E-12 | -2.03 | -1.02 | 5.0E-13 |

|         |       |       |       |         |       |       |         |
|---------|-------|-------|-------|---------|-------|-------|---------|
| Il16    | 121   | -2.78 | -1.47 | 2.0E-07 | -2.40 | -1.27 | 1.1E-05 |
| Il17d   | 192   | -1.77 | -0.82 | 8.3E-08 | -1.88 | -0.91 | 2.3E-09 |
| Il17ra  | 1921  | 3.40  | 1.76  | 1.7E-57 | 3.83  | 1.94  | 7.9E-69 |
| Il17rd  | 5562  | 1.54  | 0.63  | 2.7E-06 | 1.70  | 0.77  | 6.3E-09 |
| Il18    | 351   | -1.75 | -0.81 | 2.1E-06 | -1.89 | -0.92 | 7.2E-08 |
| Il1rap  | 1176  | 1.50  | 0.59  | 6.1E-04 | 1.73  | 0.79  | 3.1E-06 |
| Il1r12  | 235   | -2.05 | -1.04 | 6.7E-05 | -1.86 | -0.90 | 6.9E-04 |
| Il20rb  | 249   | 1.78  | 0.83  | 1.1E-08 | 1.60  | 0.68  | 4.2E-06 |
| Ilf3    | 19523 | -1.64 | -0.71 | 2.8E-19 | -1.73 | -0.79 | 1.4E-23 |
| Ilrun   | 7355  | 1.28  | 0.36  | 1.1E-04 | 1.20  | 0.26  | 6.4E-03 |
| Ilvbl   | 2182  | 1.30  | 0.38  | 3.9E-06 | 1.31  | 0.39  | 1.7E-06 |
| Imm1p1  | 2141  | 1.34  | 0.42  | 1.5E-04 | 1.41  | 0.49  | 6.9E-06 |
| Imp3    | 1956  | 1.27  | 0.34  | 4.0E-05 | 1.23  | 0.30  | 4.0E-04 |
| Imp4    | 5720  | 1.59  | 0.67  | 1.8E-20 | 1.55  | 0.63  | 3.9E-18 |
| Impa2   | 1044  | 2.29  | 1.19  | 1.2E-17 | 2.24  | 1.16  | 1.0E-16 |
| Impdh1  | 3231  | 1.62  | 0.69  | 1.2E-09 | 1.48  | 0.57  | 8.2E-07 |
| Impdh2  | 8677  | 1.32  | 0.40  | 3.5E-04 | 1.21  | 0.27  | 1.8E-02 |
| Impg2   | 400   | 2.09  | 1.07  | 9.0E-12 | 2.40  | 1.26  | 6.0E-16 |
| Inafm1  | 1121  | 1.25  | 0.32  | 3.3E-04 | 1.20  | 0.26  | 3.3E-03 |
| Inafm2  | 2534  | 2.04  | 1.03  | 4.2E-20 | 1.86  | 0.90  | 1.6E-15 |
| Ing1    | 5645  | 1.28  | 0.36  | 2.5E-06 | 1.17  | 0.22  | 4.6E-03 |
| Ing2    | 1279  | 1.68  | 0.75  | 2.1E-27 | 1.55  | 0.63  | 1.1E-19 |
| Ing3    | 2264  | -1.26 | -0.34 | 1.9E-04 | -1.30 | -0.38 | 2.4E-05 |
| Ing4    | 221   | -2.15 | -1.10 | 6.4E-12 | -1.91 | -0.93 | 1.0E-08 |
| Ing5    | 1826  | -2.42 | -1.27 | 3.8E-47 | -2.41 | -1.27 | 1.2E-46 |
| Inip    | 5102  | 1.43  | 0.51  | 1.2E-06 | 1.35  | 0.43  | 5.3E-05 |
| Inka2   | 980   | 1.91  | 0.93  | 5.7E-26 | 1.91  | 0.93  | 9.2E-26 |
| Ino80   | 2782  | -1.76 | -0.82 | 1.6E-36 | -1.74 | -0.80 | 1.7E-34 |
| Ino80b  | 1537  | 1.57  | 0.65  | 1.7E-13 | 1.51  | 0.59  | 2.4E-11 |
| Ino80c  | 1239  | -2.98 | -1.57 | 3.8E-84 | -2.99 | -1.58 | 1.3E-84 |
| Ino80d  | 4072  | -1.79 | -0.84 | 3.2E-09 | -1.81 | -0.86 | 1.3E-09 |
| Inpp1   | 1129  | -2.01 | -1.00 | 6.8E-32 | -2.01 | -1.01 | 8.4E-32 |
| Inpp4a  | 5834  | 1.63  | 0.71  | 1.2E-06 | 1.61  | 0.69  | 2.6E-06 |
| Inpp5a  | 2354  | 1.54  | 0.63  | 3.1E-12 | 1.53  | 0.61  | 1.3E-11 |
| Inpp5b  | 3385  | 1.73  | 0.79  | 1.4E-32 | 1.75  | 0.80  | 1.8E-33 |
| Inpp5d  | 366   | -1.78 | -0.83 | 1.4E-09 | -1.82 | -0.86 | 3.2E-10 |
| Inpp5e  | 2670  | -1.19 | -0.25 | 2.0E-05 | -1.26 | -0.34 | 5.9E-09 |
| Inpp5k  | 3089  | 1.58  | 0.66  | 2.6E-16 | 1.60  | 0.68  | 3.3E-17 |
| Insig2  | 2536  | 1.42  | 0.51  | 1.1E-16 | 1.43  | 0.51  | 5.7E-17 |
| Insl5   | 114   | 8.84  | 3.14  | 2.4E-42 | 9.24  | 3.21  | 1.1E-44 |
| Insl6   | 170   | 5.11  | 2.35  | 8.7E-23 | 6.14  | 2.62  | 1.3E-27 |
| Insm1   | 4447  | -1.38 | -0.47 | 3.7E-02 | -1.53 | -0.61 | 5.6E-03 |
| Insyn1  | 1174  | -1.42 | -0.51 | 1.6E-02 | -1.44 | -0.53 | 1.2E-02 |
| Insyn2b | 577   | -1.58 | -0.66 | 5.6E-03 | -1.45 | -0.54 | 2.7E-02 |
| Ints10  | 5797  | 1.20  | 0.26  | 3.0E-04 | 1.25  | 0.33  | 5.4E-06 |
| Ints12  | 2087  | -1.47 | -0.56 | 5.9E-12 | -1.50 | -0.58 | 6.1E-13 |
| Ints14  | 2799  | -2.49 | -1.32 | 3.0E-42 | -2.59 | -1.37 | 1.2E-45 |



|          |       |       |       |         |       |       |         |
|----------|-------|-------|-------|---------|-------|-------|---------|
| Ints2    | 5845  | -1.49 | -0.58 | 3.3E-13 | -1.41 | -0.49 | 7.3E-10 |
| Ints3    | 7990  | -1.19 | -0.25 | 1.5E-03 | -1.28 | -0.35 | 5.0E-06 |
| Ints5    | 2837  | 1.33  | 0.41  | 3.6E-05 | 1.21  | 0.27  | 8.5E-03 |
| Ints6    | 3398  | -1.53 | -0.62 | 3.8E-20 | -1.47 | -0.55 | 2.7E-16 |
| Ints6l   | 7039  | -1.46 | -0.55 | 1.8E-06 | -1.30 | -0.38 | 1.1E-03 |
| Ints7    | 5990  | -1.89 | -0.92 | 1.2E-40 | -1.95 | -0.96 | 3.7E-44 |
| Ints9    | 3292  | 1.47  | 0.56  | 7.9E-08 | 1.32  | 0.40  | 1.6E-04 |
| Invs     | 1538  | -1.37 | -0.45 | 5.6E-13 | -1.27 | -0.35 | 5.6E-08 |
| Ip6k2    | 1224  | -1.63 | -0.70 | 3.5E-04 | -1.78 | -0.83 | 1.9E-05 |
| Ipcef1   | 153   | -3.60 | -1.85 | 1.3E-13 | -3.91 | -1.97 | 3.5E-15 |
| Ipmk     | 4642  | 1.68  | 0.74  | 1.3E-27 | 1.58  | 0.66  | 5.4E-22 |
| Ipo13    | 7274  | 1.83  | 0.87  | 7.3E-34 | 1.77  | 0.82  | 2.3E-30 |
| Ipo5     | 30086 | 1.32  | 0.40  | 1.4E-03 | 1.25  | 0.32  | 1.2E-02 |
| Ipo7     | 26828 | 1.22  | 0.28  | 5.5E-04 | 1.27  | 0.35  | 2.0E-05 |
| Iqcc     | 1401  | -1.26 | -0.34 | 2.2E-08 | -1.27 | -0.34 | 2.0E-08 |
| Iqcg     | 764   | 2.20  | 1.14  | 1.7E-23 | 2.18  | 1.13  | 5.8E-23 |
| Iqgap3   | 4143  | 1.40  | 0.49  | 1.9E-03 | 1.39  | 0.47  | 2.5E-03 |
| Iqsec2   | 1627  | 1.47  | 0.56  | 8.2E-05 | 1.40  | 0.49  | 7.0E-04 |
| Irag1    | 160   | -3.10 | -1.63 | 1.2E-18 | -2.75 | -1.46 | 4.0E-15 |
| Irak1    | 3461  | -1.98 | -0.99 | 1.1E-53 | -2.18 | -1.13 | 2.3E-69 |
| Irak2    | 155   | -1.82 | -0.87 | 2.3E-05 | -2.11 | -1.07 | 1.3E-07 |
| Irak4    | 345   | 1.62  | 0.70  | 7.7E-07 | 1.62  | 0.69  | 1.1E-06 |
| Irf1     | 346   | 1.81  | 0.85  | 7.1E-07 | 1.56  | 0.64  | 2.7E-04 |
| Irf2bpl  | 5211  | -1.30 | -0.38 | 2.7E-02 | -1.52 | -0.60 | 3.4E-04 |
| Irf3     | 3445  | 1.56  | 0.64  | 6.3E-15 | 1.55  | 0.63  | 2.2E-14 |
| Irf8     | 271   | 2.06  | 1.05  | 2.5E-09 | 1.87  | 0.90  | 3.8E-07 |
| Irf9     | 2001  | 1.39  | 0.48  | 1.1E-06 | 1.29  | 0.37  | 2.4E-04 |
| Irgm2    | 123   | -1.62 | -0.69 | 3.6E-03 | -1.57 | -0.65 | 7.0E-03 |
| Irs2     | 3664  | 1.30  | 0.38  | 6.3E-04 | 1.22  | 0.29  | 1.1E-02 |
| Irs4     | 831   | 2.25  | 1.17  | 2.2E-11 | 1.68  | 0.74  | 3.1E-05 |
| Isca1    | 5555  | 1.69  | 0.76  | 5.1E-39 | 1.72  | 0.78  | 3.5E-41 |
| Iscu     | 1586  | 1.36  | 0.44  | 2.5E-06 | 1.32  | 0.40  | 2.7E-05 |
| Isl1     | 3389  | -1.54 | -0.62 | 1.4E-03 | -1.45 | -0.53 | 6.9E-03 |
| Islr     | 2279  | -1.93 | -0.95 | 2.4E-04 | -1.85 | -0.89 | 6.5E-04 |
| Isoc2a   | 1669  | 2.02  | 1.01  | 6.4E-21 | 1.82  | 0.87  | 1.5E-15 |
| Isy1     | 1105  | -1.79 | -0.84 | 2.6E-18 | -1.96 | -0.97 | 3.4E-24 |
| Isyna1   | 4556  | 1.55  | 0.63  | 3.6E-06 | 1.43  | 0.52  | 1.6E-04 |
| Itfg2    | 1573  | -2.14 | -1.10 | 5.3E-38 | -2.35 | -1.23 | 2.1E-47 |
| Itga10   | 613   | 1.41  | 0.50  | 4.3E-03 | 1.49  | 0.58  | 8.8E-04 |
| Itga2    | 669   | -2.23 | -1.16 | 2.5E-13 | -1.94 | -0.96 | 1.8E-09 |
| Itga3    | 1680  | 1.42  | 0.50  | 2.6E-03 | 1.53  | 0.62  | 1.7E-04 |
| Itga6    | 7402  | 1.47  | 0.55  | 2.0E-18 | 1.48  | 0.57  | 2.3E-19 |
| Itga7    | 472   | 1.79  | 0.84  | 2.7E-02 | 2.16  | 1.11  | 3.1E-03 |
| Itgav    | 3580  | -1.29 | -0.37 | 4.2E-03 | -1.21 | -0.27 | 4.2E-02 |
| Itgb1    | 18966 | -1.39 | -0.48 | 2.2E-03 | -1.30 | -0.38 | 1.6E-02 |
| Itgb1bp2 | 259   | -1.83 | -0.87 | 2.2E-02 | -1.75 | -0.81 | 3.7E-02 |
| Itgb4    | 216   | -3.23 | -1.69 | 1.3E-03 | -2.90 | -1.54 | 3.9E-03 |

|          |       |       |       |         |       |       |         |
|----------|-------|-------|-------|---------|-------|-------|---------|
| Itgb8    | 6530  | -1.44 | -0.53 | 5.0E-03 | -1.33 | -0.41 | 3.2E-02 |
| Itgb11   | 163   | -1.98 | -0.98 | 3.0E-03 | -2.11 | -1.07 | 1.1E-03 |
| Itpk1    | 2507  | 2.59  | 1.37  | 4.0E-31 | 2.55  | 1.35  | 5.0E-30 |
| Itпка    | 175   | 17.28 | 4.11  | 1.1E-58 | 10.83 | 3.44  | 3.3E-44 |
| Itpkc    | 1319  | 1.35  | 0.43  | 1.7E-06 | 1.29  | 0.37  | 4.9E-05 |
| Itpr1    | 4428  | 1.77  | 0.82  | 6.2E-07 | 2.01  | 1.01  | 6.7E-10 |
| Itpr3    | 1378  | 1.60  | 0.67  | 3.0E-03 | 1.68  | 0.75  | 9.9E-04 |
| Itprid2  | 2892  | 1.64  | 0.72  | 4.2E-10 | 1.75  | 0.81  | 1.3E-12 |
| Itprip   | 1837  | 1.58  | 0.66  | 2.3E-06 | 1.45  | 0.53  | 1.6E-04 |
| Itpripl1 | 1070  | 1.32  | 0.40  | 1.3E-05 | 1.20  | 0.26  | 5.5E-03 |
| Itpripl2 | 1637  | -2.01 | -1.01 | 2.7E-08 | -1.97 | -0.98 | 6.7E-08 |
| Itsn2    | 2301  | -1.77 | -0.83 | 5.7E-11 | -1.52 | -0.61 | 2.2E-06 |
| lws1     | 8227  | -1.56 | -0.64 | 3.9E-15 | -1.50 | -0.58 | 1.6E-12 |
| Jade1    | 2510  | -1.59 | -0.67 | 7.2E-12 | -1.61 | -0.69 | 1.6E-12 |
| Jag2     | 3207  | 1.48  | 0.56  | 2.4E-04 | 1.45  | 0.54  | 4.7E-04 |
| Jak1     | 8991  | 1.25  | 0.32  | 5.9E-03 | 1.31  | 0.39  | 7.7E-04 |
| Jazf1    | 715   | -1.96 | -0.97 | 5.4E-07 | -1.82 | -0.86 | 9.7E-06 |
| Jdp2     | 392   | -1.34 | -0.43 | 2.5E-02 | -1.36 | -0.45 | 2.0E-02 |
| Jmjd4    | 3149  | 1.34  | 0.42  | 4.6E-05 | 1.42  | 0.51  | 8.2E-07 |
| Jmjd8    | 2988  | -1.64 | -0.72 | 3.8E-31 | -1.74 | -0.80 | 4.3E-38 |
| Josd1    | 4103  | 1.53  | 0.62  | 1.6E-21 | 1.52  | 0.60  | 1.2E-20 |
| Jph2     | 121   | -3.23 | -1.69 | 1.4E-04 | -2.35 | -1.23 | 6.8E-03 |
| Jrkl     | 2004  | 1.25  | 0.32  | 4.0E-04 | 1.30  | 0.38  | 2.2E-05 |
| Junb     | 206   | 2.19  | 1.13  | 5.8E-10 | 2.20  | 1.14  | 5.4E-10 |
| Kank3    | 1409  | 1.41  | 0.50  | 1.5E-08 | 1.29  | 0.36  | 5.1E-05 |
| Kans1    | 8932  | -1.43 | -0.51 | 1.0E-14 | -1.47 | -0.56 | 3.6E-17 |
| Kans11   | 2089  | -1.80 | -0.85 | 1.7E-19 | -1.61 | -0.68 | 4.1E-13 |
| Kans12   | 5771  | -1.35 | -0.43 | 1.8E-10 | -1.43 | -0.51 | 2.0E-14 |
| Kantr    | 1925  | 1.61  | 0.69  | 6.1E-07 | 1.49  | 0.58  | 3.2E-05 |
| Kars     | 12303 | 1.32  | 0.40  | 3.2E-05 | 1.25  | 0.32  | 1.1E-03 |
| Kat14    | 2292  | -1.55 | -0.64 | 3.2E-11 | -1.68 | -0.74 | 6.1E-15 |
| Kat2a    | 3607  | -1.46 | -0.54 | 3.7E-06 | -1.53 | -0.61 | 1.8E-07 |
| Kat2b    | 1923  | -1.71 | -0.78 | 1.0E-09 | -1.73 | -0.79 | 4.2E-10 |
| Kat5     | 3136  | -2.02 | -1.02 | 3.0E-52 | -2.04 | -1.03 | 2.5E-53 |
| Kat6b    | 7883  | -2.68 | -1.42 | 1.9E-23 | -2.43 | -1.28 | 3.8E-19 |
| Kat7     | 5227  | -1.29 | -0.36 | 4.0E-08 | -1.38 | -0.46 | 2.5E-12 |
| Katnal1  | 2730  | -1.97 | -0.98 | 2.7E-24 | -2.04 | -1.03 | 9.5E-27 |
| Katnb1   | 3482  | 1.81  | 0.85  | 6.1E-23 | 1.69  | 0.75  | 4.7E-18 |
| Katnip   | 3767  | 1.32  | 0.40  | 1.3E-06 | 1.35  | 0.43  | 1.6E-07 |
| Kbtbd11  | 3918  | -1.56 | -0.64 | 8.4E-07 | -1.45 | -0.54 | 4.3E-05 |
| Kbtbd2   | 4187  | -1.24 | -0.31 | 1.2E-05 | -1.31 | -0.39 | 2.0E-08 |
| Kbtbd8   | 1457  | 1.41  | 0.50  | 1.5E-05 | 1.45  | 0.54  | 2.5E-06 |
| Kcmf1    | 4316  | -1.26 | -0.33 | 3.4E-07 | -1.28 | -0.36 | 2.8E-08 |
| Kcna1    | 358   | 1.97  | 0.97  | 1.1E-03 | 2.34  | 1.22  | 3.3E-05 |
| Kcna5    | 191   | -1.64 | -0.71 | 3.9E-05 | -1.93 | -0.95 | 4.1E-08 |
| Kcna6    | 2547  | 1.69  | 0.76  | 4.5E-06 | 1.79  | 0.84  | 4.2E-07 |
| Kcnab1   | 333   | -1.75 | -0.81 | 1.5E-03 | -1.62 | -0.69 | 7.4E-03 |

|         |       |       |       |          |       |       |          |
|---------|-------|-------|-------|----------|-------|-------|----------|
| Kcnab2  | 2430  | 2.11  | 1.08  | 6.4E-17  | 1.96  | 0.97  | 7.1E-14  |
| Kcnab3  | 1102  | 4.03  | 2.01  | 7.6E-61  | 3.63  | 1.86  | 3.9E-52  |
| Kcnb1   | 1903  | 1.44  | 0.52  | 4.3E-03  | 1.49  | 0.58  | 1.6E-03  |
| Kcnb2   | 823   | -2.71 | -1.44 | 3.4E-07  | -2.29 | -1.20 | 2.8E-05  |
| Kcnc3   | 5043  | 5.14  | 2.36  | 3.4E-42  | 4.74  | 2.24  | 3.4E-38  |
| Kcnd1   | 719   | 1.59  | 0.67  | 3.5E-09  | 1.60  | 0.67  | 2.7E-09  |
| Kcne1l  | 432   | -1.50 | -0.58 | 9.8E-04  | -1.38 | -0.46 | 1.1E-02  |
| Kcne2   | 425   | -2.54 | -1.35 | 3.1E-03  | -2.49 | -1.32 | 4.0E-03  |
| Kcne4   | 181   | -2.35 | -1.23 | 1.5E-03  | -2.33 | -1.22 | 1.8E-03  |
| Kcng1   | 529   | 2.01  | 1.01  | 3.1E-04  | 2.08  | 1.05  | 1.6E-04  |
| Kcnh1   | 270   | -2.05 | -1.03 | 2.8E-03  | -1.85 | -0.89 | 1.2E-02  |
| Kcnh3   | 315   | 2.13  | 1.09  | 2.8E-03  | 1.95  | 0.97  | 8.8E-03  |
| Kcnh8   | 391   | -2.58 | -1.37 | 3.1E-15  | -2.40 | -1.26 | 5.3E-13  |
| Kcnip2  | 325   | 1.65  | 0.72  | 1.9E-03  | 1.63  | 0.71  | 2.4E-03  |
| Kcnj10  | 1277  | 2.72  | 1.44  | 9.7E-28  | 2.66  | 1.41  | 1.8E-26  |
| Kcnj5   | 154   | -2.10 | -1.07 | 1.1E-05  | -2.11 | -1.08 | 9.2E-06  |
| Kcnj8   | 268   | -4.32 | -2.11 | 5.2E-17  | -4.71 | -2.24 | 6.2E-19  |
| Kcnk10  | 2769  | -1.47 | -0.55 | 1.1E-03  | -1.68 | -0.75 | 7.7E-06  |
| Kcnk2   | 1372  | -2.84 | -1.51 | 8.1E-19  | -3.12 | -1.64 | 4.1E-22  |
| Kcnk5   | 925   | 2.04  | 1.03  | 3.1E-06  | 1.72  | 0.78  | 5.2E-04  |
| Kcnk6   | 220   | -1.65 | -0.72 | 6.6E-03  | -1.48 | -0.56 | 4.0E-02  |
| Kcnmb4  | 843   | -1.68 | -0.75 | 6.3E-18  | -1.71 | -0.77 | 5.2E-19  |
| Kcnn3   | 2098  | 2.69  | 1.43  | 5.6E-09  | 3.26  | 1.71  | 2.2E-12  |
| Kcnq5   | 265   | -2.13 | -1.09 | 9.7E-07  | -1.70 | -0.77 | 8.3E-04  |
| Kcrg    | 233   | 1.70  | 0.77  | 7.0E-05  | 1.76  | 0.82  | 2.2E-05  |
| Kctd12  | 13048 | -1.60 | -0.67 | 3.3E-03  | -1.51 | -0.60 | 1.0E-02  |
| Kctd12b | 1142  | -1.53 | -0.61 | 8.6E-06  | -1.42 | -0.51 | 2.8E-04  |
| Kctd14  | 139   | -2.40 | -1.26 | 1.2E-15  | -2.37 | -1.25 | 4.1E-15  |
| Kctd15  | 3599  | -2.13 | -1.09 | 7.3E-16  | -2.26 | -1.17 | 4.0E-18  |
| Kctd18  | 2322  | -1.26 | -0.33 | 7.3E-05  | -1.15 | -0.21 | 1.6E-02  |
| Kctd21  | 700   | 1.37  | 0.45  | 1.8E-08  | 1.25  | 0.32  | 1.1E-04  |
| Kctd9   | 2584  | 1.40  | 0.48  | 4.6E-06  | 1.38  | 0.47  | 8.9E-06  |
| Kdelr1  | 5091  | -1.31 | -0.39 | 1.5E-11  | -1.36 | -0.44 | 1.2E-14  |
| Kdm1a   | 15192 | -1.26 | -0.33 | 6.0E-05  | -1.39 | -0.47 | 5.8E-09  |
| Kdm1b   | 5673  | 2.26  | 1.18  | 3.4E-130 | 2.28  | 1.19  | 4.1E-133 |
| Kdm4a   | 11601 | -1.61 | -0.69 | 2.1E-13  | -1.70 | -0.77 | 2.2E-16  |
| Kdm5c   | 12138 | -1.40 | -0.48 | 1.1E-14  | -1.53 | -0.61 | 3.7E-23  |
| Kdm6b   | 8176  | -1.30 | -0.38 | 4.8E-02  | -1.51 | -0.59 | 1.4E-03  |
| Kdm8    | 397   | -3.65 | -1.87 | 2.5E-33  | -3.86 | -1.95 | 4.9E-36  |
| Kdr     | 5366  | -1.35 | -0.43 | 9.8E-08  | -1.37 | -0.46 | 1.6E-08  |
| Kdsr    | 2243  | 1.48  | 0.57  | 7.9E-15  | 1.50  | 0.59  | 6.2E-16  |
| Keap1   | 2944  | -1.44 | -0.52 | 5.1E-14  | -1.55 | -0.63 | 5.1E-20  |
| Khdc4   | 9694  | -1.26 | -0.33 | 3.3E-11  | -1.27 | -0.34 | 1.3E-11  |
| Khk     | 296   | 1.37  | 0.46  | 5.6E-03  | 1.30  | 0.38  | 2.6E-02  |
| Khynyn  | 4786  | 1.32  | 0.40  | 2.1E-04  | 1.31  | 0.39  | 4.0E-04  |
| Khsrp   | 12134 | -1.35 | -0.43 | 1.1E-02  | -1.53 | -0.61 | 1.9E-04  |
| Kif13a  | 3851  | -1.99 | -0.99 | 6.3E-38  | -2.02 | -1.01 | 1.6E-39  |

|         |       |       |       |         |       |       |         |
|---------|-------|-------|-------|---------|-------|-------|---------|
| Kif13b  | 3411  | 1.29  | 0.36  | 4.0E-03 | 1.48  | 0.56  | 4.3E-06 |
| Kif14   | 2071  | -1.46 | -0.54 | 4.8E-04 | -1.48 | -0.56 | 2.9E-04 |
| Kif17   | 387   | 4.17  | 2.06  | 2.5E-27 | 4.83  | 2.27  | 1.1E-32 |
| Kif1c   | 6763  | 1.43  | 0.51  | 1.3E-04 | 1.33  | 0.41  | 2.6E-03 |
| Kif20a  | 6033  | -1.41 | -0.49 | 1.3E-02 | -1.53 | -0.61 | 1.8E-03 |
| Kif24   | 2027  | 1.69  | 0.76  | 9.8E-05 | 1.76  | 0.81  | 2.9E-05 |
| Kif26b  | 5534  | -2.50 | -1.32 | 1.3E-11 | -2.26 | -1.18 | 2.1E-09 |
| Kif27   | 755   | 2.09  | 1.07  | 3.6E-29 | 2.25  | 1.17  | 9.1E-35 |
| Kif3b   | 7784  | 1.40  | 0.48  | 3.7E-08 | 1.44  | 0.52  | 2.1E-09 |
| Kif4    | 5927  | -1.35 | -0.43 | 2.8E-02 | -1.42 | -0.51 | 8.5E-03 |
| Kif6    | 249   | 1.66  | 0.74  | 7.6E-08 | 1.84  | 0.88  | 1.2E-10 |
| Kif7    | 2665  | 2.22  | 1.15  | 4.7E-21 | 2.09  | 1.07  | 3.0E-18 |
| Kifap3  | 11972 | -1.30 | -0.38 | 1.6E-03 | -1.24 | -0.31 | 1.0E-02 |
| Kifc2   | 2883  | 2.76  | 1.46  | 5.5E-16 | 2.75  | 1.46  | 6.8E-16 |
| Kifc3   | 1352  | 1.55  | 0.64  | 2.0E-06 | 1.59  | 0.67  | 5.4E-07 |
| Kifc5b  | 1917  | 1.56  | 0.65  | 3.3E-04 | 1.37  | 0.46  | 1.4E-02 |
| Kiss1r  | 156   | 1.93  | 0.95  | 9.5E-07 | 2.00  | 1.00  | 2.7E-07 |
| Klc4    | 3631  | 1.34  | 0.43  | 1.2E-05 | 1.27  | 0.35  | 3.8E-04 |
| Klf11   | 1422  | -1.62 | -0.70 | 6.2E-36 | -1.67 | -0.74 | 2.2E-40 |
| Klf15   | 380   | 2.00  | 1.00  | 1.4E-08 | 2.02  | 1.02  | 7.9E-09 |
| Klf16   | 1425  | 2.00  | 1.00  | 1.5E-16 | 1.78  | 0.83  | 8.3E-12 |
| Klf3    | 3631  | -1.51 | -0.60 | 2.9E-15 | -1.46 | -0.55 | 7.9E-13 |
| Klf4    | 882   | -1.56 | -0.64 | 1.3E-02 | -1.59 | -0.67 | 9.9E-03 |
| Klf7    | 6968  | -1.26 | -0.34 | 2.5E-02 | -1.27 | -0.34 | 2.3E-02 |
| Klf9    | 778   | 4.16  | 2.06  | 4.4E-45 | 3.97  | 1.99  | 4.3E-42 |
| Klhdc1  | 283   | -1.47 | -0.56 | 1.1E-02 | -1.45 | -0.54 | 1.5E-02 |
| Klhdc10 | 18793 | 1.28  | 0.35  | 1.6E-03 | 1.24  | 0.31  | 5.7E-03 |
| Klhdc2  | 13166 | -1.32 | -0.40 | 6.1E-07 | -1.33 | -0.41 | 2.5E-07 |
| Klhdc3  | 8405  | 1.30  | 0.38  | 1.1E-06 | 1.22  | 0.28  | 3.8E-04 |
| Klhdc7a | 156   | -4.69 | -2.23 | 6.7E-20 | -4.23 | -2.08 | 1.3E-17 |
| Klhdc8b | 3415  | 1.27  | 0.35  | 6.3E-05 | 1.17  | 0.22  | 1.4E-02 |
| Klhl13  | 8680  | -1.37 | -0.46 | 1.8E-06 | -1.39 | -0.48 | 6.0E-07 |
| Klhl15  | 1585  | 1.56  | 0.65  | 5.0E-10 | 1.46  | 0.54  | 2.3E-07 |
| Klhl21  | 994   | 2.11  | 1.08  | 5.1E-09 | 1.99  | 0.99  | 8.9E-08 |
| Klhl23  | 5853  | -1.73 | -0.79 | 1.4E-09 | -1.79 | -0.84 | 1.1E-10 |
| Klhl24  | 11392 | -1.71 | -0.78 | 2.2E-10 | -1.53 | -0.62 | 6.6E-07 |
| Klhl25  | 3590  | 2.04  | 1.03  | 1.6E-47 | 1.97  | 0.98  | 4.3E-43 |
| Klhl26  | 1693  | 1.63  | 0.71  | 1.4E-18 | 1.58  | 0.66  | 2.2E-16 |
| Klhl28  | 5847  | 1.48  | 0.57  | 2.7E-06 | 1.70  | 0.77  | 1.4E-10 |
| Klhl3   | 898   | -2.18 | -1.12 | 1.0E-08 | -2.16 | -1.11 | 1.6E-08 |
| Klhl32  | 1209  | 1.94  | 0.95  | 2.1E-11 | 2.09  | 1.06  | 6.6E-14 |
| Klhl35  | 324   | -6.75 | -2.75 | 1.8E-27 | -7.46 | -2.90 | 2.9E-30 |
| Klhl36  | 744   | 2.71  | 1.44  | 2.0E-47 | 2.56  | 1.35  | 2.8E-42 |
| Klhl4   | 635   | -1.77 | -0.82 | 3.8E-04 | -1.61 | -0.69 | 3.4E-03 |
| Klhl42  | 1888  | -1.30 | -0.38 | 7.5E-08 | -1.30 | -0.38 | 9.6E-08 |
| Klhl5   | 5569  | 1.26  | 0.33  | 1.0E-04 | 1.24  | 0.31  | 2.9E-04 |
| Klhl6   | 383   | -1.37 | -0.45 | 1.0E-03 | -1.46 | -0.54 | 7.0E-05 |

|         |       |        |       |          |       |       |          |
|---------|-------|--------|-------|----------|-------|-------|----------|
| Klhl8   | 1637  | 1.25   | 0.33  | 1.7E-02  | 1.30  | 0.38  | 4.9E-03  |
| Kmt2e   | 18204 | -1.33  | -0.41 | 3.4E-04  | -1.36 | -0.45 | 8.9E-05  |
| Kmt5b   | 6543  | -6.45  | -2.69 | 2.2E-62  | -6.59 | -2.72 | 9.4E-64  |
| Knop1   | 15778 | 1.57   | 0.65  | 7.1E-13  | 1.52  | 0.61  | 2.9E-11  |
| Kpna3   | 14148 | 1.27   | 0.34  | 5.0E-05  | 1.28  | 0.35  | 2.4E-05  |
| Kpnb1   | 44199 | -1.47  | -0.56 | 8.8E-07  | -1.62 | -0.69 | 6.2E-10  |
| Kptn    | 941   | -2.00  | -1.00 | 4.4E-45  | -2.16 | -1.11 | 2.4E-55  |
| Kras    | 16185 | 1.38   | 0.46  | 2.1E-07  | 1.32  | 0.40  | 6.2E-06  |
| Kremen1 | 4278  | 2.41   | 1.27  | 1.0E-34  | 2.46  | 1.30  | 3.4E-36  |
| Krt1    | 134   | -3.54  | -1.82 | 5.3E-05  | -3.14 | -1.65 | 2.9E-04  |
| Krt10   | 289   | -2.75  | -1.46 | 9.3E-13  | -2.61 | -1.39 | 1.5E-11  |
| Krt14   | 629   | -8.89  | -3.15 | 2.2E-03  | -9.84 | -3.30 | 1.4E-03  |
| Krt15   | 501   | -5.82  | -2.54 | 9.5E-03  | -4.33 | -2.11 | 3.4E-02  |
| Krt17   | 127   | -10.18 | -3.35 | 1.3E-04  | -7.14 | -2.84 | 1.4E-03  |
| Krtcap2 | 3095  | 1.35   | 0.43  | 5.8E-05  | 1.25  | 0.32  | 3.3E-03  |
| Kxd1    | 1417  | -1.30  | -0.38 | 1.0E-06  | -1.40 | -0.48 | 3.1E-10  |
| Kyat3   | 996   | 2.74   | 1.45  | 4.8E-26  | 2.99  | 1.58  | 2.1E-30  |
| L2hgdh  | 2708  | 2.54   | 1.35  | 3.4E-100 | 2.56  | 1.35  | 4.1E-101 |
| L3hypdh | 561   | 1.45   | 0.53  | 1.0E-05  | 1.56  | 0.64  | 1.0E-07  |
| L3mbtl1 | 236   | 2.23   | 1.15  | 1.1E-05  | 2.42  | 1.28  | 1.1E-06  |
| Lactb   | 1520  | 2.50   | 1.32  | 1.6E-60  | 2.52  | 1.34  | 9.3E-62  |
| Lactb2  | 1288  | 1.66   | 0.73  | 6.8E-08  | 1.83  | 0.87  | 8.5E-11  |
| Lage3   | 1477  | -1.23  | -0.30 | 1.1E-02  | -1.39 | -0.48 | 2.4E-05  |
| Lair1   | 178   | -1.92  | -0.94 | 9.0E-08  | -1.75 | -0.81 | 5.7E-06  |
| Lama3   | 271   | -3.18  | -1.67 | 8.9E-06  | -2.09 | -1.07 | 6.3E-03  |
| Lama4   | 4671  | -1.49  | -0.57 | 1.6E-03  | -1.38 | -0.47 | 1.2E-02  |
| Lama5   | 3349  | 2.39   | 1.26  | 2.7E-09  | 2.73  | 1.45  | 6.1E-12  |
| Lamb1   | 8515  | -1.45  | -0.54 | 4.2E-03  | -1.39 | -0.48 | 1.3E-02  |
| Lamc1   | 11716 | 1.25   | 0.32  | 2.2E-02  | 1.33  | 0.41  | 2.9E-03  |
| Lamp2   | 10284 | 1.26   | 0.33  | 2.0E-02  | 1.35  | 0.43  | 2.2E-03  |
| Lamp5   | 587   | -6.05  | -2.60 | 9.0E-04  | -4.36 | -2.13 | 7.7E-03  |
| Lamtor1 | 2306  | -2.19  | -1.13 | 1.7E-49  | -2.29 | -1.20 | 6.3E-55  |
| Lamtor2 | 4312  | 1.52   | 0.60  | 3.5E-05  | 1.40  | 0.49  | 1.0E-03  |
| Lamtor3 | 3349  | 1.34   | 0.42  | 2.2E-13  | 1.31  | 0.39  | 1.3E-11  |
| Lancl1  | 4659  | 1.22   | 0.29  | 5.6E-04  | 1.25  | 0.33  | 8.5E-05  |
| Lancl2  | 4527  | -2.54  | -1.34 | 4.9E-49  | -2.70 | -1.43 | 1.2E-55  |
| Laptm4b | 3095  | 1.53   | 0.62  | 4.7E-11  | 1.59  | 0.67  | 7.5E-13  |
| Larp1b  | 901   | 2.87   | 1.52  | 2.6E-47  | 2.71  | 1.44  | 3.1E-42  |
| Larp4b  | 11106 | 1.38   | 0.46  | 7.8E-18  | 1.39  | 0.48  | 5.8E-19  |
| Larp6   | 215   | -2.27  | -1.18 | 1.4E-07  | -2.29 | -1.20 | 9.7E-08  |
| Larp7   | 4216  | -2.29  | -1.20 | 1.2E-14  | -2.53 | -1.34 | 3.8E-18  |
| Las1l   | 6968  | 1.40   | 0.49  | 4.1E-24  | 1.37  | 0.46  | 1.2E-21  |
| Lat2    | 610   | 3.03   | 1.60  | 5.1E-19  | 2.64  | 1.40  | 6.3E-15  |
| Lax1    | 162   | 4.73   | 2.24  | 1.2E-23  | 6.18  | 2.63  | 2.9E-31  |
| Layn    | 181   | 3.02   | 1.60  | 2.8E-16  | 2.68  | 1.42  | 4.9E-13  |
| Lbh     | 9353  | -1.31  | -0.39 | 6.9E-06  | -1.39 | -0.47 | 3.5E-08  |
| Lbhd1   | 915   | 1.37   | 0.46  | 6.5E-06  | 1.29  | 0.36  | 4.1E-04  |

|         |       |       |       |         |       |       |         |
|---------|-------|-------|-------|---------|-------|-------|---------|
| Lbp     | 122   | -1.62 | -0.70 | 2.9E-02 | -1.85 | -0.88 | 5.2E-03 |
| Lck     | 258   | -1.33 | -0.41 | 8.4E-04 | -1.38 | -0.47 | 1.1E-04 |
| Lclat1  | 2797  | 1.53  | 0.61  | 5.2E-25 | 1.55  | 0.63  | 3.2E-26 |
| Lcmt1   | 3502  | 1.71  | 0.77  | 6.8E-36 | 1.76  | 0.82  | 2.8E-40 |
| Lcp2    | 129   | -2.55 | -1.35 | 6.3E-13 | -2.19 | -1.13 | 1.5E-09 |
| Lct     | 129   | 2.20  | 1.14  | 4.8E-11 | 2.62  | 1.39  | 2.5E-15 |
| Ldah    | 2921  | -1.40 | -0.48 | 8.0E-13 | -1.39 | -0.47 | 2.9E-12 |
| Ldb1    | 15935 | -1.30 | -0.38 | 6.7E-05 | -1.40 | -0.49 | 3.0E-07 |
| Ldb3    | 118   | -4.27 | -2.09 | 1.0E-03 | -3.63 | -1.86 | 4.0E-03 |
| Ldlr    | 2768  | -1.36 | -0.44 | 3.2E-02 | -1.57 | -0.65 | 1.1E-03 |
| Ldlrap1 | 1021  | 1.80  | 0.85  | 8.7E-04 | 1.67  | 0.74  | 3.9E-03 |
| Lekr1   | 546   | 1.29  | 0.37  | 2.3E-06 | 1.25  | 0.32  | 5.2E-05 |
| Lemd1   | 426   | -2.08 | -1.06 | 7.0E-08 | -1.93 | -0.95 | 1.6E-06 |
| Leng1   | 1294  | 1.84  | 0.88  | 8.2E-14 | 1.72  | 0.79  | 3.0E-11 |
| Leng8   | 22520 | -1.25 | -0.32 | 1.4E-02 | -1.34 | -0.42 | 1.2E-03 |
| Letm1   | 3858  | -1.46 | -0.55 | 1.3E-12 | -1.53 | -0.62 | 9.3E-16 |
| Lfng    | 1615  | -1.64 | -0.72 | 8.8E-08 | -1.69 | -0.76 | 1.3E-08 |
| Lgals7  | 208   | -1.83 | -0.87 | 2.7E-03 | -1.52 | -0.61 | 4.4E-02 |
| Lgals8  | 1760  | 1.66  | 0.73  | 1.4E-20 | 1.72  | 0.78  | 2.3E-23 |
| Lgals9  | 363   | -1.66 | -0.73 | 1.5E-03 | -1.65 | -0.72 | 2.0E-03 |
| Lgi1    | 361   | -3.37 | -1.75 | 1.6E-06 | -2.98 | -1.57 | 1.9E-05 |
| Lgi4    | 135   | -2.19 | -1.13 | 1.5E-03 | -1.81 | -0.85 | 2.0E-02 |
| Lgmn    | 3063  | 1.31  | 0.38  | 7.3E-04 | 1.32  | 0.40  | 4.2E-04 |
| Lgr4    | 5083  | 1.38  | 0.47  | 7.1E-04 | 1.46  | 0.55  | 6.4E-05 |
| Lgr6    | 150   | -2.42 | -1.28 | 1.0E-02 | -3.09 | -1.63 | 9.2E-04 |
| Lhfpl2  | 3650  | -1.69 | -0.75 | 1.5E-04 | -1.71 | -0.77 | 1.0E-04 |
| Lhx8    | 610   | -2.58 | -1.37 | 7.4E-03 | -2.81 | -1.49 | 3.5E-03 |
| Lhx9    | 7621  | -1.85 | -0.89 | 1.5E-03 | -2.00 | -1.00 | 3.3E-04 |
| Lias    | 2575  | -1.22 | -0.29 | 4.3E-05 | -1.27 | -0.35 | 9.5E-07 |
| Lig3    | 7660  | -1.35 | -0.43 | 8.4E-10 | -1.36 | -0.44 | 3.6E-10 |
| Lig4    | 2648  | 1.29  | 0.36  | 1.5E-07 | 1.26  | 0.33  | 1.9E-06 |
| Limch1  | 6122  | -1.62 | -0.69 | 1.6E-10 | -1.43 | -0.52 | 2.1E-06 |
| Limd1   | 5555  | 1.28  | 0.36  | 1.7E-04 | 1.24  | 0.32  | 1.0E-03 |
| Limd2   | 4598  | -1.98 | -0.99 | 9.5E-19 | -2.17 | -1.12 | 9.7E-24 |
| Limk1   | 7085  | 1.66  | 0.73  | 1.4E-10 | 1.58  | 0.66  | 8.8E-09 |
| Limk2   | 10289 | 1.28  | 0.36  | 1.3E-05 | 1.31  | 0.39  | 2.5E-06 |
| Lims1   | 9873  | 1.40  | 0.49  | 1.2E-04 | 1.45  | 0.54  | 2.2E-05 |
| Lin37   | 976   | 1.46  | 0.54  | 1.4E-10 | 1.32  | 0.40  | 4.0E-06 |
| Lin52   | 1684  | 1.30  | 0.38  | 1.4E-06 | 1.25  | 0.32  | 5.2E-05 |
| Lin7b   | 298   | 6.34  | 2.67  | 4.5E-69 | 6.45  | 2.69  | 1.5E-69 |
| Lin9    | 1581  | -1.81 | -0.86 | 5.3E-15 | -1.81 | -0.85 | 7.9E-15 |
| Lingo1  | 1683  | -1.58 | -0.66 | 2.3E-02 | -1.52 | -0.61 | 4.0E-02 |
| Lingo3  | 150   | 2.55  | 1.35  | 4.5E-15 | 2.34  | 1.23  | 1.9E-12 |
| Lins1   | 1541  | -1.54 | -0.62 | 1.6E-35 | -1.51 | -0.59 | 5.3E-32 |
| Lipa    | 3263  | 1.69  | 0.76  | 1.3E-08 | 1.64  | 0.71  | 1.2E-07 |
| Lipe    | 975   | 1.97  | 0.98  | 4.4E-20 | 1.90  | 0.92  | 6.8E-18 |
| Lipo3   | 689   | -2.83 | -1.50 | 6.6E-45 | -3.13 | -1.64 | 2.0E-53 |



|         |       |       |       |         |       |       |         |
|---------|-------|-------|-------|---------|-------|-------|---------|
| Lipt2   | 411   | -1.44 | -0.53 | 2.1E-05 | -1.42 | -0.51 | 4.4E-05 |
| Litaf   | 2654  | 1.46  | 0.54  | 6.8E-07 | 1.50  | 0.59  | 7.7E-08 |
| Lix1l   | 12076 | 1.36  | 0.44  | 6.4E-07 | 1.28  | 0.36  | 6.7E-05 |
| Llgl2   | 368   | 2.79  | 1.48  | 9.8E-07 | 2.83  | 1.50  | 7.5E-07 |
| Llph    | 3168  | 1.35  | 0.43  | 4.9E-03 | 1.24  | 0.32  | 4.5E-02 |
| Lmbr1l  | 4606  | 1.54  | 0.62  | 4.1E-11 | 1.47  | 0.55  | 5.6E-09 |
| Lmbrd2  | 164   | 1.49  | 0.58  | 9.5E-05 | 1.41  | 0.50  | 9.5E-04 |
| Lmf1    | 769   | -1.75 | -0.81 | 8.0E-14 | -1.77 | -0.83 | 2.3E-14 |
| Lmo1    | 1246  | -1.39 | -0.47 | 3.2E-02 | -1.54 | -0.62 | 3.9E-03 |
| Lmo2    | 1194  | -1.86 | -0.90 | 4.5E-14 | -2.14 | -1.10 | 1.5E-20 |
| Lmtk2   | 4256  | 1.29  | 0.37  | 7.0E-03 | 1.26  | 0.33  | 1.8E-02 |
| Lmx1a   | 1011  | -1.57 | -0.65 | 1.5E-03 | -1.81 | -0.86 | 1.9E-05 |
| Lnpep   | 6564  | 1.21  | 0.28  | 7.6E-04 | 1.25  | 0.32  | 8.7E-05 |
| Lnpk    | 5745  | 1.28  | 0.35  | 3.6E-03 | 1.46  | 0.55  | 3.3E-06 |
| Lnx2    | 1049  | 1.51  | 0.59  | 3.1E-10 | 1.48  | 0.56  | 2.5E-09 |
| Lonp1   | 8249  | 1.49  | 0.58  | 1.4E-08 | 1.35  | 0.43  | 3.0E-05 |
| Lonp2   | 7629  | 1.57  | 0.65  | 1.5E-30 | 1.63  | 0.71  | 2.4E-36 |
| Lonrf3  | 714   | 3.43  | 1.78  | 1.6E-15 | 4.34  | 2.12  | 1.8E-21 |
| Lox     | 5374  | -2.76 | -1.46 | 1.5E-05 | -2.58 | -1.37 | 6.0E-05 |
| Lpar1   | 2608  | -1.97 | -0.98 | 5.8E-06 | -1.99 | -0.99 | 4.4E-06 |
| Lpar2   | 1612  | 1.27  | 0.34  | 2.5E-07 | 1.22  | 0.29  | 2.0E-05 |
| Lpar6   | 1124  | -1.83 | -0.87 | 2.3E-10 | -1.86 | -0.90 | 6.0E-11 |
| Lpcat2  | 491   | 1.34  | 0.42  | 2.6E-02 | 1.56  | 0.64  | 6.1E-04 |
| Lpcat3  | 1550  | 1.31  | 0.39  | 4.7E-05 | 1.31  | 0.38  | 5.1E-05 |
| Lpgat1  | 9502  | -1.52 | -0.60 | 7.8E-11 | -1.43 | -0.51 | 3.3E-08 |
| Lpin1   | 2745  | 1.49  | 0.58  | 1.1E-08 | 1.53  | 0.61  | 1.3E-09 |
| Lrfn1   | 2114  | 1.32  | 0.40  | 2.5E-03 | 1.24  | 0.31  | 2.5E-02 |
| Lrfn3   | 1428  | 1.47  | 0.56  | 1.0E-05 | 1.35  | 0.43  | 8.8E-04 |
| Lrfn4   | 2999  | -2.18 | -1.13 | 9.9E-20 | -2.31 | -1.21 | 1.2E-22 |
| Lrguk   | 610   | 1.82  | 0.86  | 5.3E-14 | 2.25  | 1.17  | 2.3E-24 |
| Lrif1   | 2501  | 1.26  | 0.34  | 3.3E-06 | 1.29  | 0.36  | 4.3E-07 |
| Lrp10   | 3105  | 1.91  | 0.93  | 9.3E-21 | 1.71  | 0.77  | 1.4E-14 |
| Lrp2    | 2856  | 1.43  | 0.52  | 3.2E-02 | 1.64  | 0.71  | 2.8E-03 |
| Lrp3    | 5457  | -1.37 | -0.45 | 1.1E-04 | -1.50 | -0.58 | 4.7E-07 |
| Lrp4    | 4657  | -1.50 | -0.59 | 6.6E-10 | -1.55 | -0.63 | 3.0E-11 |
| Lrp6    | 10654 | -1.26 | -0.33 | 1.0E-04 | -1.14 | -0.19 | 3.4E-02 |
| Lrpap1  | 6185  | 1.44  | 0.53  | 9.5E-23 | 1.43  | 0.52  | 6.0E-22 |
| Lrpprc  | 8740  | 1.63  | 0.71  | 1.8E-21 | 1.61  | 0.69  | 2.4E-20 |
| Lrr1    | 597   | 1.70  | 0.76  | 6.7E-05 | 1.49  | 0.58  | 3.2E-03 |
| Lrrc1   | 2446  | 1.64  | 0.71  | 7.0E-12 | 1.59  | 0.67  | 9.9E-11 |
| Lrrc10b | 118   | 2.31  | 1.21  | 2.9E-13 | 1.73  | 0.79  | 2.9E-06 |
| Lrrc17  | 1709  | -2.33 | -1.22 | 4.0E-03 | -2.22 | -1.15 | 7.0E-03 |
| Lrrc20  | 2243  | 1.31  | 0.39  | 2.3E-06 | 1.20  | 0.26  | 2.1E-03 |
| Lrrc23  | 263   | -1.33 | -0.41 | 1.3E-02 | -1.38 | -0.46 | 5.7E-03 |
| Lrrc28  | 1998  | 1.88  | 0.91  | 1.7E-44 | 1.90  | 0.92  | 7.3E-46 |
| Lrrc3   | 1388  | 2.38  | 1.25  | 1.2E-29 | 2.60  | 1.38  | 1.4E-35 |
| Lrrc4   | 888   | -3.27 | -1.71 | 1.1E-12 | -3.64 | -1.86 | 8.2E-15 |

|         |       |       |       |         |       |       |         |
|---------|-------|-------|-------|---------|-------|-------|---------|
| Lrrc40  | 5790  | 1.31  | 0.38  | 7.8E-04 | 1.31  | 0.39  | 6.7E-04 |
| Lrrc41  | 3730  | -1.41 | -0.50 | 3.8E-14 | -1.40 | -0.49 | 1.0E-13 |
| Lrrc42  | 4775  | 1.83  | 0.87  | 9.5E-30 | 1.68  | 0.75  | 2.1E-22 |
| Lrrc45  | 6089  | 1.34  | 0.42  | 3.7E-05 | 1.29  | 0.37  | 3.9E-04 |
| Lrrc49  | 4403  | -1.92 | -0.94 | 7.1E-19 | -1.84 | -0.88 | 1.9E-16 |
| Lrrc4b  | 4217  | -2.74 | -1.46 | 6.3E-12 | -2.98 | -1.58 | 8.4E-14 |
| Lrrc51  | 184   | 1.29  | 0.37  | 1.8E-02 | 1.31  | 0.39  | 1.1E-02 |
| Lrrc58  | 7447  | -1.24 | -0.31 | 2.1E-02 | -1.36 | -0.44 | 6.2E-04 |
| Lrrc59  | 14255 | 1.31  | 0.39  | 1.3E-07 | 1.21  | 0.27  | 2.8E-04 |
| Lrrc61  | 1302  | -2.43 | -1.28 | 1.5E-40 | -2.85 | -1.51 | 6.2E-56 |
| Lrrc73  | 581   | 2.51  | 1.33  | 5.2E-17 | 2.35  | 1.24  | 7.8E-15 |
| Lrrc75a | 1592  | 2.01  | 1.01  | 6.6E-43 | 1.96  | 0.97  | 8.3E-40 |
| Lrrc75b | 1622  | -3.53 | -1.82 | 2.0E-11 | -3.80 | -1.93 | 1.1E-12 |
| Lrrc8b  | 3769  | -1.51 | -0.60 | 9.8E-09 | -1.45 | -0.54 | 3.2E-07 |
| Lrrc8d  | 2753  | -1.33 | -0.41 | 2.6E-04 | -1.43 | -0.52 | 2.4E-06 |
| Lrrc9   | 597   | 1.48  | 0.57  | 1.9E-02 | 1.97  | 0.98  | 2.8E-05 |
| Lrrfip1 | 2511  | 1.27  | 0.35  | 4.8E-04 | 1.37  | 0.45  | 4.8E-06 |
| Lrrk1   | 709   | -2.99 | -1.58 | 2.8E-13 | -2.85 | -1.51 | 3.1E-12 |
| Lrrk2   | 647   | -2.40 | -1.26 | 1.1E-08 | -2.20 | -1.14 | 2.9E-07 |
| Lrrn4cl | 131   | 1.84  | 0.88  | 2.9E-07 | 1.91  | 0.94  | 5.2E-08 |
| Lrrtm1  | 551   | -2.92 | -1.55 | 3.0E-22 | -2.75 | -1.46 | 6.4E-20 |
| Lrrtm4  | 422   | -1.66 | -0.73 | 1.5E-03 | -1.53 | -0.61 | 8.7E-03 |
| Lrtm2   | 305   | 1.88  | 0.91  | 3.4E-02 | 2.02  | 1.01  | 1.9E-02 |
| Lrwd1   | 2507  | -1.32 | -0.40 | 1.9E-05 | -1.47 | -0.56 | 9.1E-10 |
| Lsm1    | 1777  | 1.33  | 0.42  | 2.8E-08 | 1.28  | 0.35  | 3.1E-06 |
| Lsm10   | 531   | -1.47 | -0.56 | 9.1E-14 | -1.58 | -0.66 | 4.8E-19 |
| Lsm11   | 4238  | 1.29  | 0.37  | 2.7E-02 | 1.31  | 0.38  | 2.1E-02 |
| Lsm12   | 3551  | -1.18 | -0.24 | 1.6E-03 | -1.31 | -0.38 | 3.1E-07 |
| Lsm6    | 4424  | -1.48 | -0.56 | 2.8E-06 | -1.63 | -0.70 | 3.3E-09 |
| Lsp1    | 523   | -2.44 | -1.29 | 3.1E-06 | -2.54 | -1.35 | 1.0E-06 |
| Lss     | 7158  | 1.25  | 0.32  | 1.7E-02 | 1.23  | 0.30  | 2.7E-02 |
| Lta4h   | 6868  | 1.56  | 0.64  | 2.7E-16 | 1.53  | 0.61  | 5.1E-15 |
| Ltbp1   | 2596  | -1.92 | -0.94 | 1.9E-03 | -1.64 | -0.71 | 2.2E-02 |
| Ltbp2   | 136   | -3.60 | -1.85 | 9.4E-03 | -3.17 | -1.66 | 2.1E-02 |
| Ltbp3   | 3021  | -1.66 | -0.74 | 1.4E-04 | -1.57 | -0.65 | 7.9E-04 |
| Ltbp4   | 3390  | 1.74  | 0.80  | 1.8E-06 | 1.61  | 0.69  | 5.1E-05 |
| Ltbr    | 659   | -2.63 | -1.40 | 5.9E-24 | -2.73 | -1.45 | 1.4E-25 |
| Luc7l   | 15156 | -1.34 | -0.42 | 6.6E-08 | -1.29 | -0.37 | 2.7E-06 |
| Luc7l2  | 24711 | -1.62 | -0.70 | 1.7E-08 | -1.65 | -0.72 | 5.4E-09 |
| Lum     | 7596  | -1.94 | -0.95 | 1.1E-03 | -1.92 | -0.94 | 1.3E-03 |
| Lurap1  | 660   | 3.74  | 1.90  | 2.6E-89 | 3.80  | 1.92  | 3.3E-90 |
| Lxn     | 1279  | -1.84 | -0.88 | 2.5E-10 | -1.68 | -0.75 | 9.4E-08 |
| Ly6e    | 2255  | -1.27 | -0.34 | 1.1E-07 | -1.32 | -0.40 | 4.3E-10 |
| Ly75    | 515   | 1.83  | 0.87  | 1.0E-05 | 2.05  | 1.03  | 1.6E-07 |
| Ly86    | 164   | -1.52 | -0.61 | 8.7E-04 | -1.44 | -0.53 | 4.5E-03 |
| Lyl1    | 193   | -1.77 | -0.82 | 5.9E-06 | -1.72 | -0.78 | 2.0E-05 |
| Lyn     | 618   | -1.26 | -0.34 | 1.8E-02 | -1.34 | -0.42 | 2.7E-03 |

|           |       |       |       |         |       |       |         |
|-----------|-------|-------|-------|---------|-------|-------|---------|
| Lynx1     | 536   | 4.01  | 2.00  | 3.1E-30 | 3.76  | 1.91  | 1.6E-27 |
| Lypd6     | 1468  | 1.77  | 0.82  | 6.8E-17 | 1.69  | 0.76  | 1.3E-14 |
| Lypd6b    | 164   | -2.04 | -1.03 | 1.9E-04 | -2.09 | -1.06 | 1.3E-04 |
| Lyplal1   | 543   | -1.66 | -0.73 | 1.0E-11 | -1.61 | -0.69 | 2.0E-10 |
| Lyrn2     | 1993  | -1.69 | -0.76 | 1.9E-14 | -1.72 | -0.79 | 2.2E-15 |
| Lyrn9     | 2462  | 1.86  | 0.89  | 1.6E-13 | 1.88  | 0.91  | 5.3E-14 |
| Lysmd2    | 268   | -2.63 | -1.40 | 6.8E-15 | -2.71 | -1.44 | 1.3E-15 |
| Lysmd3    | 3487  | 1.43  | 0.51  | 2.3E-05 | 1.55  | 0.63  | 1.6E-07 |
| Lyst      | 3193  | 1.41  | 0.50  | 2.9E-02 | 1.80  | 0.85  | 1.3E-04 |
| Lyve1     | 462   | -1.85 | -0.89 | 3.0E-07 | -1.93 | -0.95 | 3.9E-08 |
| Lyz2      | 356   | -1.45 | -0.54 | 2.1E-02 | -1.60 | -0.68 | 3.1E-03 |
| Lzic      | 2336  | -1.20 | -0.26 | 2.4E-07 | -1.27 | -0.34 | 5.6E-12 |
| Lztr1     | 7298  | -1.32 | -0.40 | 3.1E-15 | -1.33 | -0.41 | 6.8E-16 |
| Lzts2     | 3586  | -1.20 | -0.27 | 3.2E-02 | -1.33 | -0.42 | 5.7E-04 |
| Lzts3     | 2386  | 2.00  | 1.00  | 6.1E-16 | 1.84  | 0.88  | 1.9E-12 |
| M6pr      | 6568  | 1.48  | 0.57  | 6.5E-07 | 1.42  | 0.51  | 9.3E-06 |
| Mab21l1   | 3550  | -1.65 | -0.72 | 5.9E-04 | -1.51 | -0.59 | 5.3E-03 |
| Mab21l3   | 237   | 1.90  | 0.92  | 9.2E-07 | 1.91  | 0.94  | 7.1E-07 |
| Macir     | 3330  | -1.23 | -0.30 | 2.5E-02 | -1.30 | -0.38 | 3.4E-03 |
| Maco1     | 10206 | -1.27 | -0.34 | 1.5E-04 | -1.33 | -0.41 | 3.7E-06 |
| Macrocl1  | 174   | 1.57  | 0.65  | 9.6E-05 | 1.48  | 0.56  | 8.5E-04 |
| Macroh2a2 | 11646 | -2.12 | -1.08 | 1.9E-34 | -2.39 | -1.26 | 3.1E-46 |
| Mad2l2    | 2438  | 1.28  | 0.35  | 3.3E-07 | 1.24  | 0.31  | 7.7E-06 |
| Madd      | 10647 | 1.63  | 0.71  | 2.1E-05 | 1.63  | 0.70  | 2.6E-05 |
| Maea      | 8647  | 1.32  | 0.40  | 3.1E-07 | 1.23  | 0.30  | 1.6E-04 |
| Maf       | 3212  | -1.63 | -0.70 | 3.8E-06 | -1.64 | -0.71 | 2.8E-06 |
| Mafa      | 182   | 1.95  | 0.97  | 5.3E-03 | 2.98  | 1.57  | 3.4E-06 |
| Mafb      | 999   | -1.57 | -0.65 | 8.5E-05 | -1.71 | -0.78 | 2.2E-06 |
| Maff      | 259   | 1.61  | 0.69  | 6.0E-07 | 1.55  | 0.63  | 5.4E-06 |
| Maged2    | 13167 | -1.29 | -0.36 | 2.5E-03 | -1.26 | -0.33 | 6.8E-03 |
| Magi1     | 9802  | -1.96 | -0.97 | 2.7E-20 | -2.01 | -1.01 | 1.4E-21 |
| Magi3     | 4987  | 1.43  | 0.51  | 3.7E-10 | 1.53  | 0.61  | 7.5E-14 |
| Magohb    | 733   | -1.46 | -0.55 | 1.5E-05 | -1.42 | -0.51 | 6.7E-05 |
| Mak       | 566   | 5.75  | 2.52  | 4.7E-48 | 6.92  | 2.79  | 1.1E-57 |
| Malt1     | 1476  | 2.13  | 1.09  | 8.0E-14 | 2.48  | 1.31  | 2.3E-19 |
| Mamdc2    | 168   | -1.92 | -0.94 | 4.9E-07 | -2.11 | -1.08 | 8.2E-09 |
| Mamdc4    | 859   | -1.55 | -0.63 | 5.9E-07 | -1.56 | -0.64 | 3.6E-07 |
| Maml1     | 3053  | -1.49 | -0.57 | 1.3E-08 | -1.57 | -0.65 | 9.3E-11 |
| Maml2     | 1738  | -1.27 | -0.34 | 5.0E-08 | -1.29 | -0.37 | 5.1E-09 |
| Man1c1    | 1997  | 2.20  | 1.14  | 1.2E-21 | 2.02  | 1.01  | 2.5E-17 |
| Man2b1    | 3263  | 1.69  | 0.76  | 1.0E-16 | 1.58  | 0.66  | 8.6E-13 |
| Man2b2    | 852   | -1.35 | -0.43 | 8.6E-03 | -1.43 | -0.52 | 1.4E-03 |
| Man2c1    | 3909  | -1.36 | -0.45 | 1.8E-11 | -1.41 | -0.50 | 7.0E-14 |
| Manba     | 721   | 1.92  | 0.94  | 1.1E-13 | 2.10  | 1.07  | 2.8E-17 |
| Manbal    | 1636  | -1.48 | -0.57 | 3.9E-13 | -1.59 | -0.67 | 4.4E-18 |
| Manf      | 6389  | 1.53  | 0.61  | 3.9E-12 | 1.46  | 0.55  | 5.6E-10 |
| Maoa      | 3840  | 1.36  | 0.44  | 9.8E-05 | 1.39  | 0.48  | 2.0E-05 |

|           |       |       |       |         |       |       |         |
|-----------|-------|-------|-------|---------|-------|-------|---------|
| Map10     | 976   | 1.39  | 0.47  | 1.4E-15 | 1.36  | 0.45  | 8.4E-14 |
| Map1a     | 10875 | 1.62  | 0.69  | 2.0E-04 | 1.61  | 0.69  | 2.3E-04 |
| Map1lc3b  | 12691 | 1.56  | 0.64  | 4.5E-30 | 1.58  | 0.66  | 2.3E-31 |
| Map1s     | 2513  | -1.42 | -0.50 | 4.4E-05 | -1.54 | -0.62 | 4.0E-07 |
| Map2      | 68999 | -1.59 | -0.67 | 2.1E-04 | -1.41 | -0.49 | 7.8E-03 |
| Map2k1    | 4241  | 1.70  | 0.77  | 2.3E-18 | 1.67  | 0.74  | 3.6E-17 |
| Map2k2    | 5166  | -1.19 | -0.25 | 9.3E-03 | -1.31 | -0.39 | 3.1E-05 |
| Map2k3    | 2130  | 1.60  | 0.68  | 1.6E-05 | 1.53  | 0.62  | 8.9E-05 |
| Map2k5    | 1956  | -1.25 | -0.32 | 1.2E-06 | -1.35 | -0.43 | 4.4E-11 |
| Map2k6    | 3115  | 1.62  | 0.70  | 3.2E-24 | 1.59  | 0.67  | 1.6E-22 |
| Map2k7    | 2563  | -2.07 | -1.05 | 6.2E-18 | -2.22 | -1.15 | 3.6E-21 |
| Map3k10   | 4529  | 1.54  | 0.63  | 1.2E-06 | 1.48  | 0.56  | 1.5E-05 |
| Map3k13   | 3556  | 1.29  | 0.37  | 4.1E-02 | 1.34  | 0.42  | 2.0E-02 |
| Map3k14   | 709   | 1.82  | 0.86  | 5.6E-10 | 1.64  | 0.72  | 3.7E-07 |
| Map3k15   | 270   | 2.08  | 1.06  | 1.2E-12 | 1.98  | 0.98  | 3.9E-11 |
| Map3k20   | 1614  | 1.27  | 0.35  | 1.6E-04 | 1.29  | 0.36  | 9.5E-05 |
| Map3k3    | 3929  | 1.29  | 0.37  | 1.7E-08 | 1.23  | 0.30  | 5.4E-06 |
| Map3k5    | 380   | -1.77 | -0.83 | 6.1E-04 | -1.75 | -0.81 | 9.3E-04 |
| Map3k7    | 13156 | 1.34  | 0.42  | 5.0E-10 | 1.35  | 0.43  | 1.4E-10 |
| Map4k1    | 311   | -1.27 | -0.35 | 6.1E-03 | -1.37 | -0.45 | 3.2E-04 |
| Map4k4    | 38454 | -1.65 | -0.72 | 1.7E-19 | -1.67 | -0.74 | 3.9E-20 |
| Map7d2    | 2946  | 1.74  | 0.80  | 9.0E-09 | 1.71  | 0.77  | 2.4E-08 |
| Map7d3    | 405   | 2.19  | 1.13  | 1.1E-08 | 2.28  | 1.19  | 2.2E-09 |
| Mapk1     | 20963 | 1.33  | 0.41  | 3.2E-15 | 1.29  | 0.37  | 7.0E-13 |
| Mapk11    | 3675  | -1.26 | -0.33 | 2.9E-02 | -1.41 | -0.49 | 9.9E-04 |
| Mapk12    | 1570  | 1.81  | 0.85  | 2.5E-07 | 1.58  | 0.66  | 9.8E-05 |
| Mapk14    | 7022  | 1.55  | 0.64  | 4.6E-40 | 1.52  | 0.60  | 9.9E-36 |
| Mapk15    | 391   | 3.12  | 1.64  | 3.3E-28 | 2.79  | 1.48  | 4.8E-23 |
| Mapk1ip1l | 10734 | -1.23 | -0.30 | 6.1E-03 | -1.32 | -0.40 | 1.9E-04 |
| Mapk6     | 16863 | -1.38 | -0.46 | 5.1E-09 | -1.44 | -0.52 | 3.1E-11 |
| Mapk8ip1  | 12031 | 1.45  | 0.54  | 1.9E-07 | 1.37  | 0.46  | 1.0E-05 |
| Mapk9     | 10625 | 1.65  | 0.72  | 1.4E-14 | 1.80  | 0.85  | 1.0E-19 |
| Mapkapk2  | 8710  | 1.49  | 0.58  | 2.1E-07 | 1.33  | 0.41  | 3.7E-04 |
| Mapkapk3  | 645   | 3.87  | 1.95  | 1.5E-23 | 3.78  | 1.92  | 1.1E-22 |
| Mapre1    | 23742 | -1.32 | -0.40 | 7.0E-08 | -1.33 | -0.41 | 2.3E-08 |
| Mapre2    | 14965 | 1.35  | 0.43  | 1.6E-05 | 1.37  | 0.46  | 4.6E-06 |
| Mapre3    | 4964  | 1.36  | 0.44  | 1.3E-02 | 1.31  | 0.39  | 3.0E-02 |
| Marchf2   | 2921  | 2.06  | 1.04  | 5.8E-39 | 2.15  | 1.10  | 3.3E-43 |
| Marchf3   | 280   | 2.09  | 1.06  | 2.0E-09 | 2.03  | 1.02  | 9.6E-09 |
| Marchf7   | 11402 | -1.29 | -0.36 | 9.0E-04 | -1.21 | -0.28 | 1.4E-02 |
| Marcks    | 64056 | -2.10 | -1.07 | 3.1E-25 | -2.26 | -1.18 | 2.7E-30 |
| Marcksl1  | 49573 | -1.44 | -0.53 | 3.9E-11 | -1.55 | -0.63 | 2.4E-15 |
| Mark1     | 5757  | -1.39 | -0.48 | 3.0E-03 | -1.42 | -0.50 | 1.7E-03 |
| Mark4     | 5821  | 1.52  | 0.60  | 5.5E-05 | 1.40  | 0.49  | 1.2E-03 |
| Mars1     | 6851  | 1.25  | 0.32  | 8.5E-05 | 1.18  | 0.24  | 3.8E-03 |
| Mars2     | 3923  | 2.16  | 1.11  | 2.3E-27 | 2.29  | 1.20  | 1.5E-31 |
| Marveld1  | 1808  | -1.59 | -0.66 | 1.3E-03 | -1.56 | -0.64 | 1.9E-03 |

|          |       |        |       |          |        |       |          |
|----------|-------|--------|-------|----------|--------|-------|----------|
| Marveld2 | 138   | -2.05  | -1.04 | 9.7E-04  | -2.58  | -1.37 | 1.1E-05  |
| Marveld3 | 145   | 3.70   | 1.89  | 1.2E-22  | 3.18   | 1.67  | 5.6E-18  |
| Maskbp3  | 102   | 1.44   | 0.53  | 2.1E-02  | 1.73   | 0.79  | 4.1E-04  |
| Masp1    | 3860  | -2.88  | -1.52 | 2.5E-18  | -2.81  | -1.49 | 1.5E-17  |
| Mast3    | 433   | 2.89   | 1.53  | 1.1E-05  | 2.18   | 1.13  | 1.5E-03  |
| Mast4    | 5669  | 1.35   | 0.43  | 6.9E-03  | 1.51   | 0.59  | 1.7E-04  |
| Matk     | 460   | 2.03   | 1.02  | 3.9E-06  | 2.13   | 1.09  | 8.7E-07  |
| Matn1    | 333   | -15.73 | -3.98 | 2.2E-03  | -11.44 | -3.52 | 7.4E-03  |
| Matn2    | 712   | -2.14  | -1.09 | 3.0E-03  | -2.04  | -1.03 | 5.8E-03  |
| Matn4    | 1519  | -6.04  | -2.59 | 6.0E-03  | -5.27  | -2.40 | 1.2E-02  |
| Matr3    | 23931 | -1.27  | -0.34 | 3.7E-03  | -1.21  | -0.28 | 2.0E-02  |
| Mavs     | 1242  | 1.63   | 0.70  | 1.7E-05  | 1.58   | 0.66  | 5.4E-05  |
| Max      | 5377  | 1.73   | 0.79  | 2.7E-37  | 1.58   | 0.66  | 7.3E-26  |
| Maz      | 16904 | -1.71  | -0.77 | 4.9E-09  | -1.90  | -0.92 | 2.2E-12  |
| Mb21d2   | 2045  | -1.25  | -0.32 | 2.0E-02  | -1.23  | -0.30 | 3.2E-02  |
| Mbd2     | 2535  | 1.31   | 0.39  | 3.7E-07  | 1.19   | 0.25  | 1.8E-03  |
| Mbd3     | 6414  | -2.01  | -1.01 | 1.9E-13  | -2.27  | -1.18 | 3.7E-18  |
| Mbd4     | 2576  | 1.30   | 0.37  | 1.3E-05  | 1.33   | 0.41  | 1.8E-06  |
| Mblac2   | 1590  | 2.37   | 1.24  | 5.2E-14  | 2.25   | 1.17  | 1.4E-12  |
| Mbnl2    | 6663  | 1.25   | 0.32  | 4.7E-02  | 1.36   | 0.44  | 5.7E-03  |
| Mboat2   | 6334  | 1.25   | 0.33  | 1.3E-05  | 1.28   | 0.36  | 1.3E-06  |
| Mboat7   | 5265  | 1.93   | 0.95  | 3.0E-26  | 1.91   | 0.94  | 2.5E-25  |
| Mbp      | 2022  | 1.26   | 0.33  | 3.0E-04  | 1.19   | 0.26  | 6.0E-03  |
| Mbtps1   | 9913  | -1.40  | -0.48 | 9.0E-08  | -1.39  | -0.47 | 1.9E-07  |
| Mc4r     | 165   | 1.45   | 0.54  | 6.3E-03  | 1.60   | 0.67  | 6.3E-04  |
| Mcam     | 4295  | 1.79   | 0.84  | 4.6E-17  | 1.65   | 0.72  | 5.1E-13  |
| Mcat     | 1582  | -1.28  | -0.36 | 9.0E-06  | -1.38  | -0.46 | 5.5E-09  |
| Mcee     | 606   | 1.35   | 0.43  | 1.7E-06  | 1.38   | 0.46  | 2.9E-07  |
| Mcf2l    | 7583  | -2.10  | -1.07 | 2.1E-07  | -2.16  | -1.11 | 7.2E-08  |
| Mcfd2    | 3212  | 1.29   | 0.37  | 9.2E-05  | 1.28   | 0.35  | 2.2E-04  |
| Mcidas   | 133   | -4.10  | -2.04 | 1.0E-13  | -3.80  | -1.93 | 1.4E-12  |
| Mcl1     | 13988 | -1.20  | -0.26 | 6.8E-05  | -1.26  | -0.34 | 2.8E-07  |
| Mcm3ap   | 5291  | -3.54  | -1.83 | 1.2E-114 | -3.59  | -1.85 | 5.1E-117 |
| Mcm9     | 1058  | -1.31  | -0.39 | 4.3E-06  | -1.29  | -0.37 | 2.3E-05  |
| Mcoln1   | 4522  | 1.35   | 0.43  | 1.2E-05  | 1.29   | 0.37  | 1.8E-04  |
| Mcrip2   | 211   | 3.23   | 1.69  | 2.1E-26  | 2.97   | 1.57  | 9.2E-23  |
| Mcrs1    | 4070  | -1.89  | -0.92 | 8.1E-32  | -2.11  | -1.08 | 2.3E-43  |
| Mcts1    | 3739  | -1.31  | -0.39 | 6.6E-05  | -1.24  | -0.32 | 1.4E-03  |
| Mcub     | 136   | 2.23   | 1.15  | 4.6E-22  | 1.96   | 0.97  | 5.5E-16  |
| Mdfic    | 1291  | -2.33  | -1.22 | 7.0E-17  | -2.50  | -1.32 | 1.3E-19  |
| Mdh1     | 19514 | 1.53   | 0.62  | 7.9E-14  | 1.63   | 0.70  | 9.6E-18  |
| Mdk      | 9601  | -1.57  | -0.65 | 4.2E-03  | -1.77  | -0.82 | 2.3E-04  |
| Mdm1     | 7281  | 2.48   | 1.31  | 4.4E-50  | 2.41   | 1.27  | 5.8E-47  |
| Mdm2     | 5593  | -1.29  | -0.37 | 4.5E-04  | -1.41  | -0.49 | 1.9E-06  |
| Mdm4     | 17786 | -1.36  | -0.44 | 1.7E-05  | -1.19  | -0.25 | 1.9E-02  |
| Mdn1     | 11812 | 1.59   | 0.67  | 1.6E-03  | 1.93   | 0.95  | 5.1E-06  |
| Mdp1     | 2372  | -1.28  | -0.36 | 7.1E-07  | -1.28  | -0.36 | 5.5E-07  |

|          |       |       |       |         |       |       |         |
|----------|-------|-------|-------|---------|-------|-------|---------|
| Me1      | 1309  | -1.46 | -0.55 | 8.6E-05 | -1.39 | -0.47 | 9.3E-04 |
| Meaf6    | 4406  | -2.01 | -1.01 | 5.3E-12 | -2.16 | -1.11 | 1.8E-14 |
| Mecom    | 1546  | -1.69 | -0.76 | 5.4E-03 | -1.53 | -0.61 | 2.8E-02 |
| Mecp2    | 11258 | -1.59 | -0.67 | 2.3E-05 | -1.54 | -0.63 | 7.6E-05 |
| Mecr     | 1644  | 1.95  | 0.96  | 2.9E-23 | 1.86  | 0.90  | 2.0E-20 |
| Med10    | 3468  | 1.47  | 0.56  | 3.9E-16 | 1.38  | 0.47  | 1.1E-11 |
| Med11    | 678   | -1.95 | -0.97 | 7.8E-22 | -1.89 | -0.92 | 9.4E-20 |
| Med12    | 7067  | -1.57 | -0.65 | 7.3E-11 | -1.45 | -0.53 | 1.6E-07 |
| Med14    | 9015  | 1.22  | 0.29  | 1.0E-02 | 1.30  | 0.38  | 4.8E-04 |
| Med16    | 2471  | -2.03 | -1.02 | 6.5E-41 | -2.18 | -1.12 | 2.3E-49 |
| Med22    | 6460  | 1.33  | 0.41  | 1.0E-09 | 1.26  | 0.33  | 1.2E-06 |
| Med24    | 6283  | -1.62 | -0.69 | 1.1E-26 | -1.65 | -0.72 | 5.1E-29 |
| Med6     | 2093  | -1.57 | -0.65 | 1.2E-09 | -1.62 | -0.70 | 6.8E-11 |
| Med9     | 1312  | -1.19 | -0.25 | 1.6E-02 | -1.26 | -0.33 | 1.2E-03 |
| Mef2a    | 6251  | -1.34 | -0.42 | 3.2E-04 | -1.28 | -0.35 | 3.3E-03 |
| Mef2d    | 6108  | 1.54  | 0.62  | 1.3E-05 | 1.47  | 0.56  | 1.1E-04 |
| Megf10   | 3621  | -1.96 | -0.97 | 6.1E-22 | -1.80 | -0.84 | 9.4E-17 |
| Megf9    | 12905 | 1.41  | 0.49  | 4.8E-07 | 1.43  | 0.52  | 1.2E-07 |
| Meioc    | 118   | 2.85  | 1.51  | 1.8E-03 | 4.19  | 2.07  | 1.6E-05 |
| Meis2    | 15231 | -1.49 | -0.57 | 9.6E-04 | -1.39 | -0.47 | 7.0E-03 |
| Memo1    | 4132  | -1.22 | -0.29 | 1.6E-03 | -1.28 | -0.36 | 6.5E-05 |
| Meox2    | 259   | -3.50 | -1.81 | 7.2E-03 | -2.77 | -1.47 | 3.3E-02 |
| Mepce    | 2915  | -1.45 | -0.54 | 1.1E-06 | -1.54 | -0.63 | 8.9E-09 |
| Mest     | 36402 | -1.38 | -0.47 | 3.6E-02 | -1.45 | -0.53 | 1.7E-02 |
| Metap1   | 5356  | 1.39  | 0.47  | 4.4E-15 | 1.44  | 0.53  | 8.6E-19 |
| Metap1d  | 2494  | -1.43 | -0.51 | 8.3E-09 | -1.23 | -0.30 | 1.4E-03 |
| Metrn    | 4092  | 2.39  | 1.26  | 5.0E-10 | 2.07  | 1.05  | 2.6E-07 |
| Mettl14  | 3357  | -1.18 | -0.24 | 1.8E-02 | -1.26 | -0.34 | 9.1E-04 |
| Mettl15  | 259   | -1.58 | -0.66 | 1.3E-07 | -1.61 | -0.69 | 5.8E-08 |
| Mettl16  | 4340  | -1.46 | -0.55 | 6.6E-33 | -1.44 | -0.53 | 1.9E-30 |
| Mettl17  | 2775  | 1.34  | 0.42  | 2.0E-10 | 1.30  | 0.38  | 9.5E-09 |
| Mettl21a | 888   | -1.51 | -0.59 | 2.9E-13 | -1.53 | -0.62 | 2.8E-14 |
| Mettl22  | 504   | -2.07 | -1.05 | 5.4E-16 | -2.19 | -1.13 | 2.3E-18 |
| Mettl25  | 505   | -2.81 | -1.49 | 3.5E-46 | -2.85 | -1.51 | 4.1E-47 |
| Mettl27  | 770   | 2.27  | 1.19  | 1.1E-17 | 2.28  | 1.19  | 1.1E-17 |
| Mettl4   | 3171  | -2.09 | -1.06 | 1.3E-46 | -1.90 | -0.93 | 6.6E-36 |
| Mettl6   | 4156  | 1.30  | 0.37  | 5.8E-06 | 1.27  | 0.35  | 3.0E-05 |
| Mettl8   | 1816  | 1.49  | 0.57  | 2.5E-14 | 1.62  | 0.70  | 8.7E-21 |
| Mettl9   | 8475  | -1.38 | -0.47 | 1.2E-06 | -1.46 | -0.55 | 1.1E-08 |
| Mex3a    | 23844 | -1.76 | -0.81 | 1.1E-07 | -2.00 | -1.00 | 4.7E-11 |
| Mex3b    | 7788  | -2.08 | -1.06 | 1.4E-23 | -2.26 | -1.18 | 5.5E-29 |
| Mfap1a   | 3409  | 1.28  | 0.35  | 2.4E-09 | 1.29  | 0.36  | 6.8E-10 |
| Mfap1b   | 1919  | 1.26  | 0.33  | 1.2E-05 | 1.26  | 0.33  | 8.8E-06 |
| Mfap2    | 5735  | -1.57 | -0.65 | 3.9E-05 | -1.58 | -0.66 | 2.9E-05 |
| Mfap3    | 9210  | 1.28  | 0.36  | 1.3E-05 | 1.36  | 0.44  | 7.5E-08 |
| Mfap3l   | 1004  | 2.22  | 1.15  | 3.2E-18 | 2.68  | 1.42  | 4.1E-27 |
| Mfap4    | 4350  | -2.10 | -1.07 | 2.9E-04 | -1.97 | -0.98 | 1.0E-03 |



|         |       |       |       |         |       |       |         |
|---------|-------|-------|-------|---------|-------|-------|---------|
| Mfge8   | 3006  | 1.48  | 0.57  | 2.8E-05 | 1.35  | 0.44  | 1.7E-03 |
| Mfhas1  | 3184  | 1.27  | 0.35  | 4.4E-03 | 1.22  | 0.29  | 1.9E-02 |
| Mfng    | 3161  | -2.22 | -1.15 | 4.6E-08 | -2.64 | -1.40 | 1.9E-11 |
| Mfsd1   | 5510  | 1.64  | 0.71  | 2.0E-14 | 1.60  | 0.68  | 3.1E-13 |
| Mfsd10  | 1380  | -1.93 | -0.95 | 2.7E-21 | -2.18 | -1.12 | 3.5E-29 |
| Mfsd11  | 2408  | 1.45  | 0.53  | 5.2E-21 | 1.51  | 0.59  | 1.9E-25 |
| Mfsd12  | 2585  | 4.22  | 2.08  | 2.9E-55 | 3.84  | 1.94  | 1.8E-48 |
| Mfsd13a | 472   | 1.91  | 0.94  | 3.5E-11 | 1.82  | 0.86  | 1.4E-09 |
| Mfsd14b | 4325  | 1.30  | 0.38  | 4.5E-06 | 1.34  | 0.42  | 3.9E-07 |
| Mfsd2b  | 505   | 1.50  | 0.58  | 1.6E-04 | 1.52  | 0.60  | 9.2E-05 |
| Mfsd3   | 268   | 1.43  | 0.52  | 6.7E-06 | 1.38  | 0.46  | 6.7E-05 |
| Mfsd4b4 | 1123  | -1.39 | -0.48 | 9.5E-13 | -1.26 | -0.33 | 1.2E-06 |
| Mfsd6   | 1074  | -2.97 | -1.57 | 7.5E-21 | -3.04 | -1.60 | 1.2E-21 |
| Mfsd9   | 638   | 3.03  | 1.60  | 4.9E-41 | 3.06  | 1.61  | 2.2E-41 |
| Mgarp   | 268   | 1.96  | 0.97  | 7.6E-03 | 1.83  | 0.87  | 1.8E-02 |
| Mgat1   | 3069  | -1.35 | -0.44 | 1.4E-07 | -1.44 | -0.52 | 2.4E-10 |
| Mgat3   | 4905  | -1.61 | -0.69 | 9.8E-09 | -1.67 | -0.74 | 5.6E-10 |
| Mgat4a  | 1876  | 1.31  | 0.39  | 2.7E-02 | 1.42  | 0.51  | 3.4E-03 |
| Mgat5b  | 3614  | -1.79 | -0.84 | 7.9E-04 | -1.85 | -0.89 | 3.9E-04 |
| Mgme1   | 683   | -1.97 | -0.98 | 4.3E-19 | -1.98 | -0.98 | 2.3E-19 |
| Mgp     | 202   | -5.29 | -2.40 | 6.4E-06 | -3.90 | -1.96 | 2.8E-04 |
| Mgrn1   | 8129  | 1.26  | 0.33  | 1.7E-06 | 1.22  | 0.29  | 3.4E-05 |
| Mgst3   | 1564  | 1.59  | 0.67  | 3.8E-11 | 1.68  | 0.75  | 7.9E-14 |
| Mib2    | 3792  | 1.39  | 0.48  | 1.5E-04 | 1.31  | 0.39  | 1.9E-03 |
| Mical1  | 2455  | -1.84 | -0.88 | 7.2E-19 | -2.06 | -1.05 | 3.2E-26 |
| Mical2  | 885   | 2.42  | 1.27  | 6.4E-15 | 2.31  | 1.21  | 1.5E-13 |
| Mical3  | 6409  | 1.48  | 0.57  | 3.2E-04 | 1.44  | 0.53  | 8.1E-04 |
| Micall1 | 4284  | -1.33 | -0.41 | 1.8E-04 | -1.31 | -0.39 | 3.8E-04 |
| Micall2 | 1258  | 2.10  | 1.07  | 2.5E-20 | 2.01  | 1.00  | 5.7E-18 |
| Micu1   | 5433  | 1.87  | 0.90  | 4.9E-71 | 1.86  | 0.89  | 2.2E-69 |
| Micu2   | 3704  | -2.11 | -1.08 | 2.6E-46 | -2.13 | -1.09 | 2.3E-47 |
| Mideas  | 3080  | 1.29  | 0.37  | 2.1E-04 | 1.28  | 0.36  | 4.1E-04 |
| Midn    | 15309 | -1.91 | -0.93 | 3.1E-09 | -2.18 | -1.12 | 5.8E-13 |
| Mier3   | 3964  | -1.28 | -0.36 | 1.4E-06 | -1.22 | -0.28 | 2.1E-04 |
| Miga2   | 2929  | 1.72  | 0.78  | 1.2E-36 | 1.70  | 0.77  | 1.2E-35 |
| Miip    | 3843  | 1.34  | 0.42  | 1.9E-05 | 1.20  | 0.26  | 1.1E-02 |
| Minar1  | 411   | 1.86  | 0.89  | 5.2E-03 | 2.71  | 1.44  | 4.2E-06 |
| Minar2  | 3572  | -1.49 | -0.58 | 9.5E-04 | -1.42 | -0.51 | 4.1E-03 |
| Mindy1  | 2377  | -1.64 | -0.72 | 1.4E-44 | -1.69 | -0.76 | 9.4E-50 |
| Mindy2  | 5630  | 1.45  | 0.54  | 6.3E-05 | 1.56  | 0.64  | 1.5E-06 |
| Mindy3  | 3678  | 1.36  | 0.45  | 5.0E-09 | 1.39  | 0.47  | 4.8E-10 |
| Mindy4  | 560   | -5.12 | -2.36 | 1.1E-97 | -4.78 | -2.26 | 3.3E-90 |
| Mink1   | 6672  | 1.33  | 0.41  | 6.4E-04 | 1.25  | 0.32  | 9.3E-03 |
| Mios    | 2877  | -1.30 | -0.38 | 2.3E-06 | -1.19 | -0.25 | 2.1E-03 |
| Mis18a  | 1946  | 1.57  | 0.65  | 5.2E-05 | 1.46  | 0.54  | 8.4E-04 |
| Misp    | 245   | 2.97  | 1.57  | 1.2E-07 | 3.14  | 1.65  | 2.5E-08 |
| Mitf    | 516   | 2.23  | 1.15  | 3.3E-14 | 2.43  | 1.28  | 3.5E-17 |

|         |       |       |       |         |       |       |         |
|---------|-------|-------|-------|---------|-------|-------|---------|
| Mki67   | 37376 | -1.42 | -0.50 | 4.5E-03 | -1.33 | -0.41 | 2.3E-02 |
| Mknk1   | 3209  | 2.16  | 1.11  | 2.2E-70 | 2.23  | 1.16  | 2.9E-76 |
| Mknk2   | 8080  | 1.76  | 0.82  | 1.5E-10 | 1.64  | 0.71  | 3.2E-08 |
| Mks1    | 1023  | -2.03 | -1.02 | 1.4E-25 | -2.08 | -1.06 | 3.7E-27 |
| Mlc1    | 600   | -2.97 | -1.57 | 1.8E-14 | -3.17 | -1.67 | 3.5E-16 |
| Mlec    | 23501 | 1.44  | 0.53  | 1.3E-06 | 1.46  | 0.54  | 6.8E-07 |
| Mlf1    | 943   | 1.63  | 0.71  | 3.3E-06 | 1.79  | 0.84  | 2.9E-08 |
| Mlf2    | 14065 | 1.26  | 0.34  | 1.1E-04 | 1.21  | 0.28  | 1.9E-03 |
| Mlh1    | 2263  | -1.47 | -0.56 | 8.7E-09 | -1.57 | -0.65 | 2.1E-11 |
| Mlh3    | 1742  | -1.77 | -0.82 | 6.2E-28 | -1.57 | -0.65 | 5.7E-18 |
| Mllt10  | 5619  | -1.47 | -0.56 | 2.0E-18 | -1.50 | -0.59 | 1.8E-20 |
| Mllt11  | 16031 | -1.56 | -0.65 | 2.5E-03 | -1.49 | -0.57 | 8.0E-03 |
| Mllt3   | 7786  | -1.52 | -0.61 | 4.1E-11 | -1.47 | -0.56 | 1.3E-09 |
| Mlst8   | 2354  | -2.67 | -1.42 | 8.3E-74 | -2.96 | -1.57 | 6.3E-90 |
| Mlxip   | 9877  | 2.09  | 1.06  | 2.1E-28 | 2.00  | 1.00  | 2.7E-25 |
| Mlxipl  | 515   | 4.55  | 2.19  | 5.5E-31 | 3.73  | 1.90  | 1.1E-23 |
| Mmab    | 1482  | -1.85 | -0.88 | 6.7E-26 | -1.90 | -0.93 | 2.9E-28 |
| Mmachc  | 1470  | -1.62 | -0.70 | 1.1E-09 | -1.74 | -0.80 | 2.4E-12 |
| Mmd     | 6246  | 1.48  | 0.57  | 2.4E-06 | 1.48  | 0.57  | 2.6E-06 |
| Mmgt2   | 1037  | -1.33 | -0.41 | 2.3E-05 | -1.45 | -0.53 | 3.2E-08 |
| Mmp14   | 5686  | -2.88 | -1.52 | 6.7E-19 | -2.89 | -1.53 | 5.1E-19 |
| Mmp17   | 2242  | 2.88  | 1.52  | 1.5E-29 | 2.57  | 1.36  | 7.3E-24 |
| Mmp23   | 259   | 1.97  | 0.98  | 1.6E-06 | 2.07  | 1.05  | 2.2E-07 |
| Mmp24   | 2663  | -1.59 | -0.67 | 2.4E-02 | -1.54 | -0.62 | 3.8E-02 |
| Mmp25   | 191   | -1.45 | -0.54 | 5.4E-03 | -1.39 | -0.47 | 1.6E-02 |
| Mmrn2   | 804   | -1.33 | -0.41 | 2.3E-05 | -1.34 | -0.43 | 1.2E-05 |
| Mms19   | 6431  | 1.64  | 0.71  | 8.3E-20 | 1.70  | 0.77  | 1.1E-22 |
| Mms22l  | 3477  | 1.34  | 0.42  | 6.8E-03 | 1.33  | 0.41  | 8.9E-03 |
| Mob2    | 1818  | 1.39  | 0.47  | 1.9E-14 | 1.40  | 0.49  | 4.7E-15 |
| Mob3a   | 3676  | 1.55  | 0.63  | 2.5E-09 | 1.48  | 0.57  | 1.3E-07 |
| Mob3c   | 423   | -1.48 | -0.56 | 4.6E-09 | -1.71 | -0.77 | 6.8E-16 |
| Mocs2   | 4439  | 1.58  | 0.66  | 2.6E-26 | 1.62  | 0.69  | 7.4E-29 |
| Mocs3   | 562   | 1.25  | 0.32  | 6.2E-06 | 1.29  | 0.36  | 3.9E-07 |
| Mogat2  | 213   | 2.29  | 1.20  | 1.3E-05 | 1.78  | 0.83  | 3.1E-03 |
| Mok     | 770   | 1.68  | 0.75  | 6.5E-21 | 1.80  | 0.85  | 2.6E-26 |
| Mon1a   | 907   | -1.30 | -0.38 | 3.3E-04 | -1.39 | -0.48 | 3.8E-06 |
| Mon1b   | 2895  | 1.36  | 0.44  | 9.1E-05 | 1.28  | 0.36  | 1.6E-03 |
| Mon2    | 9326  | 1.28  | 0.36  | 3.3E-05 | 1.35  | 0.44  | 2.5E-07 |
| Morc3   | 3727  | -1.29 | -0.36 | 9.7E-13 | -1.24 | -0.31 | 1.1E-09 |
| Morc4   | 1402  | 1.49  | 0.58  | 2.7E-05 | 1.50  | 0.59  | 2.0E-05 |
| Morf4l1 | 20022 | -1.42 | -0.51 | 1.4E-15 | -1.48 | -0.56 | 5.8E-19 |
| Morn1   | 629   | 2.37  | 1.25  | 3.8E-47 | 2.23  | 1.16  | 1.3E-40 |
| Mospd2  | 2650  | 1.27  | 0.34  | 4.1E-04 | 1.35  | 0.43  | 5.8E-06 |
| Mov10   | 1177  | -1.70 | -0.77 | 5.7E-05 | -1.84 | -0.88 | 3.5E-06 |
| Mpc1    | 1384  | 1.32  | 0.40  | 3.5E-04 | 1.40  | 0.49  | 1.2E-05 |
| Mpc2    | 2092  | 1.24  | 0.31  | 1.5E-03 | 1.30  | 0.38  | 9.2E-05 |

|          |       |       |       |         |       |       |         |
|----------|-------|-------|-------|---------|-------|-------|---------|
| Mpdu1    | 2495  | -2.10 | -1.07 | 2.0E-36 | -2.28 | -1.19 | 1.1E-44 |
| Mpeg1    | 670   | -1.43 | -0.52 | 2.5E-03 | -1.32 | -0.40 | 2.0E-02 |
| Mphosph8 | 7814  | 1.32  | 0.40  | 2.6E-07 | 1.30  | 0.38  | 1.4E-06 |
| Mphosph9 | 3551  | -1.49 | -0.57 | 3.2E-06 | -1.41 | -0.49 | 6.6E-05 |
| Mpi      | 3535  | 1.41  | 0.49  | 4.2E-14 | 1.35  | 0.43  | 3.6E-11 |
| Mpp2     | 4567  | 1.88  | 0.91  | 4.0E-12 | 1.75  | 0.81  | 7.9E-10 |
| Mpp3     | 3135  | 1.28  | 0.36  | 8.7E-03 | 1.29  | 0.36  | 7.6E-03 |
| Mpp4     | 216   | 2.66  | 1.41  | 2.6E-10 | 3.07  | 1.62  | 4.0E-13 |
| Mpp7     | 2944  | 1.78  | 0.83  | 6.8E-19 | 1.74  | 0.80  | 1.3E-17 |
| Mppe1    | 364   | -2.72 | -1.45 | 5.3E-15 | -2.59 | -1.37 | 1.3E-13 |
| Mpped2   | 4714  | -2.58 | -1.37 | 8.2E-12 | -2.59 | -1.37 | 6.9E-12 |
| Mpst     | 1986  | 1.50  | 0.58  | 9.2E-11 | 1.35  | 0.43  | 2.3E-06 |
| Mpv17l   | 761   | 2.04  | 1.03  | 1.2E-10 | 2.17  | 1.12  | 2.0E-12 |
| Mpzl1    | 9286  | 1.61  | 0.69  | 7.5E-40 | 1.60  | 0.68  | 5.8E-39 |
| Mpzl3    | 134   | -4.67 | -2.22 | 5.0E-42 | -4.85 | -2.28 | 3.0E-43 |
| Mrc1     | 2082  | -1.32 | -0.40 | 1.5E-02 | -1.34 | -0.42 | 1.1E-02 |
| Mrc2     | 4882  | -1.66 | -0.73 | 1.4E-04 | -1.81 | -0.86 | 6.4E-06 |
| Mreg     | 417   | 2.03  | 1.02  | 3.4E-04 | 3.03  | 1.60  | 9.6E-09 |
| Mrfap1   | 18037 | -1.27 | -0.34 | 9.8E-04 | -1.38 | -0.46 | 7.0E-06 |
| Mrgpre   | 425   | -1.50 | -0.59 | 5.4E-06 | -1.55 | -0.63 | 9.1E-07 |
| Mrm1     | 852   | 1.88  | 0.91  | 1.9E-20 | 1.90  | 0.93  | 3.6E-21 |
| Mrm3     | 468   | -1.20 | -0.27 | 4.8E-03 | -1.35 | -0.43 | 2.3E-06 |
| Mro      | 349   | 1.59  | 0.67  | 3.8E-07 | 1.58  | 0.66  | 5.4E-07 |
| Mroh1    | 5037  | 2.01  | 1.00  | 4.9E-20 | 2.01  | 1.01  | 3.3E-20 |
| Mrpl11   | 2893  | -1.35 | -0.43 | 1.9E-06 | -1.40 | -0.48 | 8.0E-08 |
| Mrpl14   | 1093  | 1.30  | 0.37  | 1.9E-05 | 1.23  | 0.30  | 6.8E-04 |
| Mrpl17   | 2490  | 1.31  | 0.40  | 5.8E-10 | 1.23  | 0.30  | 3.0E-06 |
| Mrpl18   | 2767  | -1.19 | -0.25 | 2.6E-02 | -1.28 | -0.35 | 1.6E-03 |
| Mrpl21   | 1573  | -1.42 | -0.50 | 2.3E-06 | -1.52 | -0.60 | 1.4E-08 |
| Mrpl23   | 1564  | -1.43 | -0.52 | 3.5E-07 | -1.53 | -0.62 | 1.0E-09 |
| Mrpl24   | 6353  | 1.30  | 0.38  | 8.3E-10 | 1.27  | 0.34  | 2.9E-08 |
| Mrpl27   | 1124  | -2.18 | -1.13 | 6.8E-36 | -2.22 | -1.15 | 1.6E-37 |
| Mrpl28   | 3257  | 1.41  | 0.50  | 1.8E-06 | 1.28  | 0.35  | 1.0E-03 |
| Mrpl3    | 3732  | -1.49 | -0.57 | 9.9E-22 | -1.58 | -0.66 | 2.0E-28 |
| Mrpl34   | 1952  | 1.37  | 0.45  | 1.3E-05 | 1.20  | 0.26  | 1.5E-02 |
| Mrpl35   | 1437  | -1.51 | -0.59 | 6.3E-11 | -1.48 | -0.56 | 5.6E-10 |
| Mrpl37   | 3517  | -1.30 | -0.37 | 6.0E-08 | -1.36 | -0.44 | 1.5E-10 |
| Mrpl40   | 1394  | -1.38 | -0.46 | 3.1E-05 | -1.44 | -0.53 | 1.8E-06 |
| Mrpl41   | 2210  | 1.36  | 0.45  | 2.9E-07 | 1.39  | 0.47  | 5.2E-08 |
| Mrpl43   | 2286  | 1.53  | 0.61  | 5.6E-13 | 1.40  | 0.49  | 1.4E-08 |
| Mrpl44   | 1438  | -1.47 | -0.55 | 4.6E-09 | -1.52 | -0.60 | 1.8E-10 |
| Mrpl45   | 1841  | -1.90 | -0.92 | 2.6E-39 | -2.03 | -1.02 | 1.7E-47 |
| Mrpl46   | 1168  | -1.26 | -0.33 | 3.0E-03 | -1.30 | -0.38 | 6.7E-04 |
| Mrpl48   | 1790  | -1.90 | -0.93 | 1.5E-54 | -1.85 | -0.89 | 5.3E-50 |
| Mrpl49   | 3480  | 1.53  | 0.61  | 1.7E-09 | 1.40  | 0.49  | 2.3E-06 |
| Mrpl54   | 740   | -2.53 | -1.34 | 1.6E-19 | -2.62 | -1.39 | 8.1E-21 |

|         |       |       |       |         |       |       |         |
|---------|-------|-------|-------|---------|-------|-------|---------|
| Mrpl55  | 1554  | 1.36  | 0.44  | 4.5E-06 | 1.29  | 0.36  | 2.0E-04 |
| Mrpl58  | 2394  | -1.50 | -0.58 | 9.8E-08 | -1.69 | -0.76 | 2.2E-12 |
| Mrps12  | 1130  | 1.32  | 0.40  | 4.0E-04 | 1.23  | 0.30  | 9.2E-03 |
| Mrps15  | 1902  | -1.48 | -0.56 | 7.7E-18 | -1.47 | -0.56 | 1.9E-17 |
| Mrps16  | 1164  | -1.30 | -0.38 | 2.7E-04 | -1.37 | -0.45 | 1.1E-05 |
| Mrps18a | 1426  | -1.53 | -0.62 | 1.7E-24 | -1.60 | -0.68 | 3.2E-29 |
| Mrps22  | 2285  | 1.26  | 0.34  | 2.7E-04 | 1.30  | 0.38  | 3.2E-05 |
| Mrps26  | 1920  | 1.27  | 0.35  | 1.5E-07 | 1.17  | 0.22  | 1.3E-03 |
| Mrps28  | 457   | -1.59 | -0.67 | 9.3E-06 | -1.60 | -0.68 | 6.0E-06 |
| Mrps30  | 1973  | -1.32 | -0.40 | 6.5E-07 | -1.37 | -0.46 | 1.6E-08 |
| Mrps35  | 1439  | -1.73 | -0.79 | 1.9E-26 | -1.90 | -0.93 | 1.7E-35 |
| Mrps5   | 4667  | -1.31 | -0.39 | 1.8E-12 | -1.35 | -0.43 | 1.3E-14 |
| Mrps6   | 1363  | 1.55  | 0.63  | 1.2E-07 | 1.48  | 0.56  | 3.1E-06 |
| Mrrf    | 1458  | -1.64 | -0.72 | 6.2E-40 | -1.67 | -0.74 | 3.2E-42 |
| Mrs2    | 8554  | 1.23  | 0.30  | 4.0E-04 | 1.32  | 0.40  | 2.3E-06 |
| Mrtfa   | 3292  | 1.38  | 0.46  | 1.4E-04 | 1.23  | 0.30  | 1.7E-02 |
| Mrtfb   | 3074  | -1.45 | -0.54 | 6.7E-10 | -1.39 | -0.48 | 5.4E-08 |
| Mrto4   | 2130  | -1.22 | -0.29 | 3.1E-03 | -1.36 | -0.45 | 2.4E-06 |
| Ms4a6b  | 163   | -1.99 | -1.00 | 4.1E-06 | -2.21 | -1.15 | 1.0E-07 |
| Ms4a6c  | 182   | -2.07 | -1.05 | 1.1E-07 | -2.11 | -1.08 | 4.2E-08 |
| Msantd1 | 237   | 1.47  | 0.56  | 1.9E-05 | 1.45  | 0.53  | 5.5E-05 |
| Msantd3 | 2656  | -1.62 | -0.70 | 8.5E-10 | -1.79 | -0.84 | 1.1E-13 |
| Msh2    | 10003 | 1.36  | 0.45  | 1.9E-06 | 1.29  | 0.36  | 1.3E-04 |
| Msh3    | 3059  | -1.36 | -0.45 | 7.2E-08 | -1.37 | -0.46 | 3.6E-08 |
| Msh5    | 739   | 2.41  | 1.27  | 1.7E-16 | 2.29  | 1.19  | 9.1E-15 |
| Msh6    | 10340 | 1.26  | 0.33  | 9.7E-03 | 1.20  | 0.26  | 4.7E-02 |
| Msi1    | 10774 | -2.33 | -1.22 | 5.8E-07 | -2.84 | -1.51 | 5.1E-10 |
| Msl1    | 15044 | -1.86 | -0.89 | 2.0E-14 | -2.02 | -1.01 | 3.0E-18 |
| Msl3l2  | 386   | -1.94 | -0.96 | 1.6E-31 | -2.03 | -1.02 | 4.4E-35 |
| Msmo1   | 7657  | 1.46  | 0.55  | 1.1E-03 | 1.41  | 0.49  | 3.7E-03 |
| Msrb1   | 1392  | 2.02  | 1.02  | 4.7E-27 | 1.94  | 0.95  | 5.6E-24 |
| Msrb2   | 231   | -3.77 | -1.91 | 1.4E-29 | -3.82 | -1.93 | 5.9E-30 |
| Mt1     | 609   | 1.63  | 0.71  | 4.2E-05 | 1.61  | 0.69  | 6.5E-05 |
| Mta1    | 7459  | -1.24 | -0.31 | 4.9E-02 | -1.40 | -0.49 | 1.4E-03 |
| Mta3    | 1599  | -1.65 | -0.72 | 6.7E-18 | -1.70 | -0.77 | 5.2E-20 |
| Mtap    | 5054  | 1.58  | 0.66  | 1.5E-05 | 1.43  | 0.52  | 9.2E-04 |
| Mtarc2  | 2559  | 1.44  | 0.52  | 1.7E-08 | 1.52  | 0.60  | 7.6E-11 |
| Mtch2   | 3929  | 1.29  | 0.37  | 9.8E-08 | 1.29  | 0.37  | 1.2E-07 |
| Mterf3  | 2886  | -1.39 | -0.48 | 3.2E-07 | -1.34 | -0.42 | 7.0E-06 |
| Mtfmt   | 1768  | 1.52  | 0.61  | 1.2E-38 | 1.53  | 0.61  | 5.8E-39 |
| Mtfp1   | 351   | 2.31  | 1.21  | 6.1E-23 | 2.27  | 1.18  | 4.8E-22 |
| Mtfr1   | 4828  | 1.43  | 0.52  | 5.5E-09 | 1.39  | 0.47  | 1.6E-07 |
| Mtfr1l  | 6647  | 1.58  | 0.66  | 5.0E-36 | 1.57  | 0.65  | 4.0E-35 |
| Mtfr2   | 863   | 1.84  | 0.88  | 3.5E-07 | 1.67  | 0.74  | 2.0E-05 |
| Mtg1    | 878   | -1.96 | -0.97 | 1.4E-30 | -1.93 | -0.95 | 2.1E-29 |
| Mtg2    | 1525  | -1.22 | -0.28 | 1.3E-03 | -1.27 | -0.35 | 7.0E-05 |

|         |       |        |       |         |        |       |         |
|---------|-------|--------|-------|---------|--------|-------|---------|
| Mthfd1  | 4316  | 1.28   | 0.36  | 4.3E-03 | 1.19   | 0.26  | 4.7E-02 |
| Mthfd1l | 881   | -1.83  | -0.87 | 5.5E-05 | -1.98  | -0.98 | 5.0E-06 |
| Mthfd2  | 2200  | 1.64   | 0.71  | 3.6E-07 | 1.53   | 0.61  | 1.6E-05 |
| Mthfd2l | 2867  | -1.72  | -0.78 | 7.9E-13 | -1.66  | -0.73 | 2.6E-11 |
| Mthfsl  | 295   | -2.34  | -1.22 | 7.3E-19 | -2.06  | -1.04 | 6.8E-14 |
| Mtif2   | 4422  | -1.27  | -0.34 | 1.2E-05 | -1.26  | -0.33 | 2.3E-05 |
| Mtm1    | 1136  | 2.88   | 1.53  | 2.2E-42 | 3.11   | 1.64  | 2.6E-48 |
| Mtmr1   | 2726  | -1.58  | -0.66 | 2.8E-06 | -1.45  | -0.53 | 1.8E-04 |
| Mtmr10  | 2554  | 1.55   | 0.63  | 1.6E-16 | 1.61   | 0.68  | 3.2E-19 |
| Mtmr11  | 1131  | 1.25   | 0.32  | 8.0E-03 | 1.31   | 0.39  | 1.1E-03 |
| Mtmr12  | 2972  | 1.49   | 0.58  | 4.8E-18 | 1.49   | 0.58  | 7.4E-18 |
| Mtmr14  | 3162  | 1.56   | 0.64  | 1.4E-14 | 1.45   | 0.53  | 2.7E-10 |
| Mtmr2   | 4932  | -1.58  | -0.66 | 1.5E-16 | -1.57  | -0.65 | 2.3E-16 |
| Mtmr6   | 8264  | 1.35   | 0.43  | 2.7E-08 | 1.41   | 0.50  | 1.6E-10 |
| Mtmr9   | 5920  | -1.26  | -0.33 | 7.4E-04 | -1.22  | -0.28 | 4.4E-03 |
| Mtor    | 10534 | 1.48   | 0.57  | 7.4E-11 | 1.56   | 0.65  | 1.1E-13 |
| Mtpap   | 2047  | -1.22  | -0.29 | 1.2E-03 | -1.25  | -0.32 | 2.9E-04 |
| Mtrf1   | 404   | -1.89  | -0.92 | 1.6E-30 | -1.70  | -0.77 | 9.6E-22 |
| Mtrf1l  | 1065  | 1.46   | 0.54  | 2.6E-17 | 1.50   | 0.58  | 1.4E-19 |
| Mtrr    | 1171  | -1.54  | -0.62 | 7.2E-26 | -1.67  | -0.74 | 8.2E-36 |
| Mtss2   | 5444  | -1.40  | -0.48 | 5.0E-03 | -1.48  | -0.56 | 1.0E-03 |
| Mturn   | 13174 | 1.56   | 0.64  | 7.3E-05 | 1.65   | 0.72  | 7.8E-06 |
| Mtus1   | 4353  | -2.09  | -1.06 | 1.1E-42 | -2.22  | -1.15 | 6.9E-50 |
| Mtx1    | 1889  | -1.38  | -0.46 | 2.9E-06 | -1.52  | -0.60 | 7.6E-10 |
| Mtx2    | 3879  | -1.28  | -0.35 | 4.3E-05 | -1.23  | -0.30 | 6.2E-04 |
| Mtx3    | 3934  | -2.82  | -1.49 | 3.3E-51 | -2.51  | -1.33 | 8.9E-41 |
| Mul1    | 2768  | 1.51   | 0.60  | 1.8E-12 | 1.39   | 0.47  | 2.9E-08 |
| Mvb12a  | 1557  | 1.66   | 0.73  | 1.4E-29 | 1.57   | 0.65  | 1.0E-23 |
| Mvb12b  | 9118  | -1.92  | -0.94 | 2.8E-08 | -2.02  | -1.02 | 1.9E-09 |
| Mvd     | 2606  | 1.87   | 0.90  | 8.7E-17 | 1.77   | 0.83  | 3.0E-14 |
| Mvk     | 2925  | 1.82   | 0.87  | 5.6E-16 | 1.68   | 0.75  | 3.7E-12 |
| Mvp     | 706   | 1.65   | 0.72  | 1.9E-12 | 1.48   | 0.56  | 5.3E-08 |
| Mxd1    | 3518  | 1.83   | 0.87  | 4.4E-15 | 1.77   | 0.82  | 1.2E-13 |
| Mxi1    | 5443  | 1.44   | 0.52  | 1.2E-09 | 1.40   | 0.48  | 3.0E-08 |
| Mxra7   | 2547  | 1.90   | 0.93  | 1.9E-18 | 1.88   | 0.91  | 9.9E-18 |
| Mybl1   | 2585  | 1.55   | 0.63  | 1.9E-06 | 1.70   | 0.77  | 5.0E-09 |
| Mybph   | 185   | -33.70 | -5.07 | 4.2E-05 | -15.23 | -3.93 | 1.9E-03 |
| Myc     | 840   | -2.08  | -1.05 | 1.1E-07 | -2.04  | -1.03 | 2.4E-07 |
| Mycbp   | 1104  | 1.69   | 0.76  | 1.3E-08 | 1.72   | 0.78  | 4.8E-09 |
| Mycbpap | 316   | 1.51   | 0.60  | 2.1E-04 | 1.49   | 0.58  | 3.7E-04 |
| Mycn    | 3287  | -1.40  | -0.48 | 2.1E-03 | -1.51  | -0.59 | 1.4E-04 |
| Myct1   | 154   | -2.06  | -1.05 | 6.6E-08 | -2.28  | -1.19 | 9.7E-10 |
| Myd88   | 307   | -1.39  | -0.48 | 1.5E-04 | -1.45  | -0.54 | 1.7E-05 |
| Myef2   | 23440 | -1.45  | -0.53 | 5.0E-09 | -1.41  | -0.49 | 6.5E-08 |
| Myh3    | 1854  | -21.90 | -4.45 | 8.0E-05 | -12.37 | -3.63 | 1.6E-03 |
| Myh7    | 338   | -7.07  | -2.82 | 1.4E-04 | -4.58  | -2.20 | 3.7E-03 |
| Myh8    | 737   | -9.69  | -3.28 | 9.6E-04 | -8.45  | -3.08 | 2.1E-03 |

|         |       |        |       |          |        |       |          |
|---------|-------|--------|-------|----------|--------|-------|----------|
| Myl12b  | 341   | 1.54   | 0.63  | 3.8E-12  | 1.46   | 0.54  | 2.3E-09  |
| Myl4    | 243   | -15.83 | -3.98 | 1.5E-05  | -7.79  | -2.96 | 1.6E-03  |
| Myl6b   | 933   | 1.44   | 0.52  | 1.5E-02  | 1.43   | 0.52  | 1.6E-02  |
| Mylk    | 1785  | -1.20  | -0.27 | 4.4E-02  | -1.25  | -0.32 | 1.5E-02  |
| Mylk4   | 118   | -10.43 | -3.38 | 1.3E-04  | -6.26  | -2.65 | 3.4E-03  |
| Myo1a   | 639   | 5.90   | 2.56  | 5.0E-60  | 5.49   | 2.46  | 1.8E-55  |
| Myo1b   | 11754 | -2.12  | -1.08 | 1.4E-42  | -2.08  | -1.06 | 7.9E-41  |
| Myo1e   | 3165  | 3.35   | 1.74  | 1.4E-64  | 3.28   | 1.71  | 2.9E-62  |
| Myo1f   | 179   | -1.59  | -0.67 | 3.7E-04  | -1.56  | -0.64 | 8.2E-04  |
| Myo5b   | 385   | -1.89  | -0.92 | 2.7E-04  | -1.92  | -0.94 | 1.9E-04  |
| Myo6    | 5438  | 1.90   | 0.92  | 3.4E-28  | 2.05   | 1.04  | 3.5E-35  |
| Myo7a   | 2242  | -1.76  | -0.81 | 1.5E-12  | -1.75  | -0.81 | 2.0E-12  |
| Myo9b   | 12403 | 1.43   | 0.51  | 3.5E-08  | 1.52   | 0.61  | 5.1E-11  |
| Myog    | 193   | -29.97 | -4.91 | 1.3E-03  | -16.74 | -4.07 | 8.7E-03  |
| Myom1   | 412   | -2.44  | -1.29 | 3.6E-03  | -1.90  | -0.93 | 4.3E-02  |
| Myorg   | 2371  | 3.42   | 1.77  | 1.3E-67  | 3.30   | 1.72  | 9.2E-64  |
| Mypop   | 765   | 1.92   | 0.94  | 2.4E-17  | 1.76   | 0.82  | 4.0E-13  |
| Myrip   | 448   | 1.53   | 0.61  | 1.2E-02  | 1.71   | 0.77  | 1.4E-03  |
| Myt1    | 8901  | -1.76  | -0.81 | 1.9E-07  | -1.81  | -0.85 | 4.2E-08  |
| Mzf1    | 456   | -4.50  | -2.17 | 9.2E-55  | -4.22  | -2.08 | 1.3E-50  |
| N4bp2   | 9983  | -1.56  | -0.64 | 4.6E-13  | -1.46  | -0.54 | 1.4E-09  |
| N4bp211 | 706   | 2.22   | 1.15  | 4.7E-13  | 2.33   | 1.22  | 1.3E-14  |
| N4bp212 | 6276  | -1.29  | -0.37 | 3.1E-06  | -1.23  | -0.30 | 1.7E-04  |
| N6amt1  | 946   | -4.03  | -2.01 | 1.1E-128 | -4.09  | -2.03 | 1.3E-130 |
| Naa16   | 1973  | -1.31  | -0.39 | 6.6E-07  | -1.29  | -0.37 | 2.7E-06  |
| Naa50   | 13698 | 1.45   | 0.53  | 3.4E-07  | 1.34   | 0.42  | 6.6E-05  |
| Naalad2 | 290   | -1.85  | -0.89 | 1.1E-05  | -1.85  | -0.89 | 1.1E-05  |
| Nabp1   | 1079  | 2.44   | 1.29  | 2.6E-51  | 2.61   | 1.38  | 6.6E-59  |
| Nacad   | 4515  | -2.17  | -1.12 | 6.8E-07  | -2.32  | -1.21 | 7.2E-08  |
| Naga    | 1940  | 1.85   | 0.89  | 6.5E-18  | 1.80   | 0.85  | 2.3E-16  |
| Nagk    | 1716  | -1.44  | -0.52 | 1.9E-09  | -1.51  | -0.59 | 9.1E-12  |
| Naglu   | 690   | 1.42   | 0.51  | 4.3E-05  | 1.42   | 0.50  | 6.4E-05  |
| Naif1   | 341   | -2.56  | -1.35 | 2.8E-34  | -2.98  | -1.58 | 2.4E-45  |
| Nanos2  | 219   | 3.81   | 1.93  | 2.2E-10  | 3.19   | 1.67  | 4.3E-08  |
| Nans    | 4872  | 1.76   | 0.82  | 7.4E-31  | 1.65   | 0.73  | 1.4E-24  |
| Nap1l5  | 3791  | 1.90   | 0.93  | 4.5E-09  | 2.04   | 1.03  | 5.8E-11  |
| Napa    | 6805  | 1.33   | 0.41  | 2.0E-10  | 1.24   | 0.31  | 1.5E-06  |
| Napepld | 1868  | 2.18   | 1.12  | 3.1E-08  | 1.73   | 0.79  | 1.3E-04  |
| Nars2   | 1491  | 1.89   | 0.92  | 1.3E-20  | 1.94   | 0.96  | 3.3E-22  |
| Nasp    | 36412 | -1.30  | -0.38 | 1.7E-02  | -1.39  | -0.48 | 2.7E-03  |
| Nat10   | 4931  | 1.30   | 0.38  | 1.8E-07  | 1.24   | 0.31  | 2.6E-05  |
| Nat14   | 696   | -1.32  | -0.40 | 4.5E-03  | -1.51  | -0.59 | 1.4E-05  |
| Nat8f4  | 594   | -1.43  | -0.52 | 2.7E-07  | -1.48  | -0.57 | 1.8E-08  |
| Natd1   | 5000  | 1.26   | 0.33  | 3.8E-07  | 1.20   | 0.26  | 8.7E-05  |
| Naxd    | 2877  | -1.31  | -0.39 | 2.3E-08  | -1.35  | -0.43 | 6.1E-10  |
| Nbeal1  | 6207  | 1.52   | 0.60  | 3.3E-03  | 1.89   | 0.92  | 3.7E-06  |
| Nbeal2  | 1295  | 2.27   | 1.19  | 3.1E-20  | 2.11   | 1.08  | 5.9E-17  |



|         |        |       |       |         |       |       |         |
|---------|--------|-------|-------|---------|-------|-------|---------|
| Nbl1    | 1625   | -1.81 | -0.85 | 1.3E-03 | -1.72 | -0.79 | 3.3E-03 |
| Nbn     | 1557   | -3.74 | -1.90 | 7.6E-65 | -3.81 | -1.93 | 1.8E-66 |
| Ncald   | 3248   | 1.87  | 0.90  | 3.2E-09 | 1.74  | 0.80  | 1.7E-07 |
| Ncapd3  | 5583   | 1.43  | 0.52  | 7.3E-05 | 1.52  | 0.61  | 2.9E-06 |
| Ncbp1   | 12054  | 1.31  | 0.39  | 6.3E-06 | 1.30  | 0.37  | 1.4E-05 |
| Ncdn    | 4818   | 1.34  | 0.42  | 3.0E-03 | 1.28  | 0.35  | 1.4E-02 |
| Nceh1   | 1038   | 3.19  | 1.67  | 8.8E-90 | 3.22  | 1.69  | 1.8E-90 |
| Ncf1    | 181    | -2.08 | -1.06 | 9.7E-11 | -2.22 | -1.15 | 2.0E-12 |
| Nck2    | 2584   | -1.21 | -0.27 | 1.5E-04 | -1.34 | -0.43 | 1.8E-09 |
| Ncl     | 55506  | -1.28 | -0.35 | 3.9E-03 | -1.38 | -0.46 | 1.4E-04 |
| Ncln    | 4700   | 1.44  | 0.52  | 2.4E-05 | 1.32  | 0.40  | 1.7E-03 |
| Ncoa2   | 6533   | -1.45 | -0.53 | 3.8E-09 | -1.36 | -0.44 | 1.4E-06 |
| Ncoa3   | 5325   | 1.35  | 0.43  | 1.9E-06 | 1.38  | 0.46  | 3.7E-07 |
| Ncoa5   | 9033   | -1.33 | -0.41 | 6.2E-05 | -1.44 | -0.53 | 1.4E-07 |
| Ncoa6   | 9034   | -1.38 | -0.46 | 7.4E-09 | -1.33 | -0.41 | 3.7E-07 |
| Ncoa7   | 1481   | -2.09 | -1.06 | 7.8E-22 | -2.05 | -1.03 | 9.9E-21 |
| Ncs1    | 6683   | -2.01 | -1.01 | 3.8E-11 | -2.09 | -1.07 | 2.5E-12 |
| Ncstn   | 6281   | -1.57 | -0.66 | 1.5E-30 | -1.62 | -0.69 | 3.8E-34 |
| Ndel1   | 3903   | 1.24  | 0.31  | 2.1E-07 | 1.26  | 0.34  | 1.6E-08 |
| Ndfip1  | 16911  | 1.25  | 0.32  | 2.4E-03 | 1.25  | 0.32  | 2.2E-03 |
| Ndor1   | 767    | 1.37  | 0.46  | 6.7E-06 | 1.37  | 0.45  | 8.7E-06 |
| Ndp     | 239    | -2.13 | -1.09 | 5.0E-10 | -2.13 | -1.09 | 5.4E-10 |
| Ndr3    | 6322   | 1.73  | 0.79  | 7.9E-29 | 1.72  | 0.78  | 3.8E-28 |
| Ndr4    | 7781   | 1.44  | 0.53  | 1.1E-03 | 1.48  | 0.57  | 4.5E-04 |
| Ndst1   | 10114  | -1.30 | -0.38 | 6.7E-06 | -1.25 | -0.32 | 1.3E-04 |
| Ndst2   | 2010   | -1.33 | -0.41 | 1.0E-07 | -1.38 | -0.47 | 9.5E-10 |
| Ndst3   | 2340   | -1.64 | -0.72 | 9.5E-05 | -1.47 | -0.55 | 3.0E-03 |
| Ndufa2  | 2265   | -1.29 | -0.37 | 1.1E-02 | -1.36 | -0.44 | 2.0E-03 |
| Ndufa7  | 3458   | -1.25 | -0.32 | 5.0E-05 | -1.28 | -0.36 | 5.6E-06 |
| Ndufa9  | 5537   | -1.26 | -0.33 | 6.7E-05 | -1.30 | -0.37 | 4.5E-06 |
| Ndufaf1 | 1120   | -1.74 | -0.79 | 9.5E-19 | -1.88 | -0.91 | 5.0E-24 |
| Ndufaf2 | 1728   | 1.48  | 0.56  | 3.8E-06 | 1.44  | 0.53  | 1.7E-05 |
| Ndufaf4 | 3275   | 1.33  | 0.41  | 2.8E-09 | 1.38  | 0.47  | 1.3E-11 |
| Ndufaf6 | 453    | 1.36  | 0.44  | 6.5E-07 | 1.16  | 0.22  | 2.1E-02 |
| Ndufaf7 | 1775   | -1.58 | -0.66 | 2.1E-33 | -1.52 | -0.60 | 4.2E-28 |
| Ndufaf8 | 326    | -1.99 | -0.99 | 1.2E-08 | -2.01 | -1.01 | 7.1E-09 |
| Ndufb3  | 2690   | -1.27 | -0.34 | 1.3E-02 | -1.25 | -0.32 | 2.1E-02 |
| Ndufb6  | 2727   | 1.30  | 0.38  | 1.3E-03 | 1.29  | 0.37  | 2.0E-03 |
| Ndufs7  | 1435   | -1.26 | -0.33 | 4.7E-04 | -1.37 | -0.46 | 8.4E-07 |
| Ndufs8  | 2218   | -1.46 | -0.55 | 4.6E-08 | -1.53 | -0.62 | 7.3E-10 |
| Ndufv3  | 3865   | 1.55  | 0.63  | 1.4E-19 | 1.52  | 0.60  | 7.6E-18 |
| Neb     | 476    | -8.89 | -3.15 | 8.6E-04 | -6.33 | -2.66 | 5.6E-03 |
| Necab3  | 636    | 1.30  | 0.38  | 1.9E-02 | 1.35  | 0.43  | 6.4E-03 |
| Necap2  | 2857   | 1.37  | 0.46  | 6.9E-07 | 1.24  | 0.31  | 1.2E-03 |
| Nectin2 | 3683   | 1.84  | 0.88  | 1.7E-15 | 1.83  | 0.87  | 3.9E-15 |
| Nedd4   | 141961 | -1.35 | -0.43 | 3.0E-06 | -1.32 | -0.40 | 1.4E-05 |
| Nedd4l  | 8509   | -1.28 | -0.36 | 4.7E-02 | -1.32 | -0.41 | 2.4E-02 |

|          |       |       |       |         |       |       |         |
|----------|-------|-------|-------|---------|-------|-------|---------|
| Nedd9    | 3178  | 1.41  | 0.49  | 8.3E-12 | 1.38  | 0.46  | 1.7E-10 |
| Neil1    | 491   | -2.31 | -1.21 | 2.0E-27 | -2.33 | -1.22 | 4.2E-28 |
| Neil3    | 1825  | -1.61 | -0.68 | 5.5E-05 | -1.66 | -0.73 | 1.7E-05 |
| Nek1     | 5685  | 1.59  | 0.67  | 6.8E-17 | 1.77  | 0.82  | 8.1E-25 |
| Nek3     | 465   | -1.67 | -0.74 | 1.2E-08 | -1.84 | -0.88 | 7.2E-12 |
| Nek4     | 2231  | -1.41 | -0.49 | 5.2E-11 | -1.51 | -0.59 | 1.9E-15 |
| Nek9     | 9825  | -1.36 | -0.44 | 1.7E-14 | -1.33 | -0.41 | 5.1E-13 |
| Nelfa    | 2468  | -1.37 | -0.46 | 3.0E-07 | -1.52 | -0.61 | 4.5E-12 |
| Nelfb    | 5282  | -1.26 | -0.34 | 1.8E-05 | -1.39 | -0.47 | 1.1E-09 |
| Nelfe    | 3000  | 1.53  | 0.61  | 1.1E-06 | 1.37  | 0.45  | 4.6E-04 |
| Nemf     | 8657  | 1.24  | 0.31  | 2.1E-07 | 1.30  | 0.37  | 1.9E-10 |
| Nemp1    | 3795  | 2.39  | 1.26  | 1.5E-27 | 2.38  | 1.25  | 1.9E-27 |
| Nenf     | 818   | -1.63 | -0.71 | 1.4E-22 | -1.63 | -0.70 | 3.2E-22 |
| Net1     | 3061  | -1.46 | -0.55 | 1.7E-02 | -1.48 | -0.57 | 1.4E-02 |
| Neto2    | 6922  | -1.66 | -0.73 | 1.1E-03 | -1.56 | -0.65 | 4.5E-03 |
| Neu1     | 1849  | 2.16  | 1.11  | 2.8E-37 | 2.09  | 1.06  | 3.8E-34 |
| Neu3     | 382   | 1.68  | 0.75  | 2.6E-12 | 2.04  | 1.03  | 6.4E-22 |
| Neur12   | 115   | -1.48 | -0.57 | 5.3E-03 | -1.42 | -0.50 | 1.5E-02 |
| Neur13   | 151   | 2.73  | 1.45  | 3.4E-12 | 2.74  | 1.46  | 3.5E-12 |
| Neurod1  | 2403  | -1.43 | -0.52 | 1.4E-03 | -1.58 | -0.66 | 3.5E-05 |
| Neurog1  | 475   | -2.00 | -1.00 | 4.6E-03 | -2.49 | -1.32 | 1.5E-04 |
| Nexmif   | 3129  | -2.12 | -1.09 | 1.7E-03 | -1.76 | -0.81 | 2.3E-02 |
| Nexn     | 473   | -2.54 | -1.34 | 3.2E-05 | -2.00 | -1.00 | 2.5E-03 |
| Nf1      | 8492  | -1.34 | -0.42 | 1.2E-04 | -1.27 | -0.35 | 1.9E-03 |
| Nfam1    | 283   | -1.52 | -0.60 | 3.3E-04 | -1.63 | -0.71 | 2.2E-05 |
| Nfatc1   | 689   | -1.65 | -0.72 | 4.9E-03 | -1.60 | -0.68 | 8.5E-03 |
| Nfatc2   | 552   | 2.04  | 1.03  | 5.8E-07 | 2.24  | 1.17  | 1.4E-08 |
| Nfatc2ip | 2440  | 2.11  | 1.07  | 1.8E-20 | 1.90  | 0.93  | 1.7E-15 |
| Nfatc4   | 3812  | -2.04 | -1.03 | 9.2E-09 | -2.10 | -1.07 | 2.2E-09 |
| Nfe2     | 103   | -2.15 | -1.10 | 1.3E-02 | -2.51 | -1.33 | 2.6E-03 |
| Nfe2l2   | 2059  | 1.43  | 0.52  | 1.3E-06 | 1.48  | 0.56  | 1.7E-07 |
| Nfe2l3   | 803   | 4.19  | 2.07  | 8.5E-61 | 3.97  | 1.99  | 1.5E-56 |
| Nfia     | 6750  | -1.71 | -0.78 | 1.4E-03 | -1.83 | -0.88 | 3.0E-04 |
| Nfib     | 18590 | -2.04 | -1.03 | 5.5E-04 | -2.04 | -1.03 | 5.8E-04 |
| Nfic     | 2525  | -1.51 | -0.60 | 7.9E-04 | -1.57 | -0.65 | 2.6E-04 |
| Nfix     | 5859  | -2.03 | -1.02 | 4.0E-03 | -2.11 | -1.08 | 2.3E-03 |
| Nfkb1    | 2019  | -1.96 | -0.97 | 8.9E-27 | -2.00 | -1.00 | 2.0E-28 |
| Nfkb2    | 1194  | 3.15  | 1.66  | 1.6E-16 | 3.19  | 1.68  | 7.0E-17 |
| Nfkbia   | 750   | -1.87 | -0.90 | 1.8E-23 | -2.02 | -1.02 | 2.5E-29 |
| Nfkbib   | 867   | 1.41  | 0.50  | 1.5E-08 | 1.35  | 0.43  | 9.9E-07 |
| Nfkbie   | 688   | 3.90  | 1.96  | 2.0E-69 | 3.57  | 1.83  | 1.0E-60 |
| Nfkbi11  | 565   | -1.27 | -0.35 | 3.8E-03 | -1.36 | -0.44 | 1.8E-04 |
| Nfkbi2   | 500   | 1.35  | 0.44  | 5.2E-03 | 1.41  | 0.50  | 1.4E-03 |
| Nfu1     | 1593  | -1.40 | -0.48 | 2.2E-14 | -1.34 | -0.42 | 3.0E-11 |
| Nfyb     | 4464  | -1.51 | -0.59 | 1.9E-12 | -1.53 | -0.62 | 1.7E-13 |
| Nfyc     | 3064  | -2.16 | -1.11 | 3.0E-64 | -2.19 | -1.13 | 2.0E-66 |
| Ngdn     | 2572  | 1.30  | 0.38  | 1.4E-04 | 1.32  | 0.41  | 3.7E-05 |

|          |       |       |       |         |       |       |         |
|----------|-------|-------|-------|---------|-------|-------|---------|
| Ngef     | 397   | 2.08  | 1.06  | 3.1E-08 | 1.95  | 0.96  | 5.9E-07 |
| Ngly1    | 1682  | -1.47 | -0.55 | 1.1E-10 | -1.42 | -0.51 | 3.7E-09 |
| Nhej1    | 194   | -2.15 | -1.10 | 1.1E-16 | -2.40 | -1.26 | 3.4E-21 |
| Nhlh1    | 2918  | -1.63 | -0.71 | 8.1E-06 | -1.62 | -0.70 | 1.1E-05 |
| Nhlh2    | 5362  | -2.89 | -1.53 | 1.7E-16 | -2.74 | -1.46 | 4.9E-15 |
| Nhlrc1   | 586   | 1.95  | 0.96  | 1.1E-15 | 1.87  | 0.91  | 4.7E-14 |
| Nhlrc2   | 3753  | -1.68 | -0.75 | 5.2E-19 | -1.62 | -0.70 | 1.4E-16 |
| Nhp2     | 3319  | 1.37  | 0.45  | 7.1E-04 | 1.26  | 0.34  | 1.4E-02 |
| Nhsl2    | 1894  | -1.38 | -0.46 | 5.0E-04 | -1.27 | -0.34 | 1.2E-02 |
| Niban1   | 371   | -2.01 | -1.01 | 2.0E-04 | -1.68 | -0.75 | 7.0E-03 |
| Nif3l1   | 3005  | -1.35 | -0.43 | 4.7E-09 | -1.36 | -0.44 | 1.4E-09 |
| Nim1k    | 551   | 1.63  | 0.70  | 9.0E-08 | 1.49  | 0.58  | 1.3E-05 |
| Nin      | 4425  | -1.32 | -0.40 | 1.3E-03 | -1.20 | -0.26 | 4.2E-02 |
| Ninj1    | 704   | 2.63  | 1.39  | 9.9E-19 | 2.80  | 1.48  | 5.7E-21 |
| Nipa2    | 4612  | 1.32  | 0.40  | 9.0E-08 | 1.36  | 0.44  | 3.8E-09 |
| Nipal1   | 136   | 2.53  | 1.34  | 1.4E-06 | 2.55  | 1.35  | 1.2E-06 |
| Nipal2   | 164   | -3.20 | -1.68 | 1.0E-10 | -3.71 | -1.89 | 3.6E-13 |
| Nipal3   | 2856  | 2.27  | 1.18  | 3.2E-24 | 2.31  | 1.21  | 3.0E-25 |
| Nipsnap2 | 3417  | -1.72 | -0.78 | 1.0E-28 | -1.81 | -0.86 | 3.8E-34 |
| Nisch    | 40348 | -1.52 | -0.61 | 2.4E-22 | -1.51 | -0.59 | 4.5E-21 |
| Nit1     | 2863  | 1.25  | 0.32  | 2.9E-06 | 1.17  | 0.23  | 1.4E-03 |
| Nkain4   | 1161  | -1.36 | -0.45 | 1.6E-04 | -1.33 | -0.42 | 4.7E-04 |
| Nkapl    | 138   | 1.29  | 0.37  | 1.6E-02 | 1.31  | 0.39  | 1.1E-02 |
| Nkd1     | 5147  | 1.71  | 0.77  | 1.6E-11 | 1.58  | 0.66  | 1.0E-08 |
| Nkiras1  | 1723  | 1.97  | 0.98  | 8.1E-32 | 2.02  | 1.01  | 3.6E-34 |
| Nkiras2  | 4808  | 1.27  | 0.34  | 1.8E-06 | 1.17  | 0.22  | 2.5E-03 |
| Nlk      | 6570  | 1.45  | 0.53  | 4.7E-07 | 1.35  | 0.43  | 5.0E-05 |
| Nln      | 4003  | 1.61  | 0.69  | 2.8E-21 | 1.71  | 0.77  | 1.5E-26 |
| Nlrx1    | 296   | -2.67 | -1.41 | 5.2E-24 | -2.61 | -1.39 | 3.9E-23 |
| Nmd3     | 3367  | 1.28  | 0.36  | 6.0E-06 | 1.25  | 0.33  | 3.9E-05 |
| Nme4     | 974   | -1.45 | -0.53 | 1.6E-03 | -1.43 | -0.52 | 2.4E-03 |
| Nme5     | 229   | 1.61  | 0.69  | 6.9E-06 | 1.66  | 0.73  | 1.8E-06 |
| Nme6     | 1056  | -1.43 | -0.52 | 5.7E-06 | -1.63 | -0.71 | 3.7E-10 |
| Nmi      | 175   | -2.77 | -1.47 | 1.1E-12 | -2.45 | -1.29 | 4.8E-10 |
| Nmnat1   | 462   | -3.63 | -1.86 | 4.6E-55 | -4.02 | -2.01 | 3.3E-64 |
| Nmnat3   | 168   | 2.21  | 1.14  | 6.9E-15 | 2.00  | 1.00  | 1.8E-11 |
| Nmrk1    | 448   | 1.46  | 0.55  | 2.2E-03 | 1.67  | 0.74  | 3.0E-05 |
| Nmt2     | 10711 | 1.52  | 0.61  | 3.0E-17 | 1.57  | 0.65  | 1.5E-19 |
| Noa1     | 2066  | 1.80  | 0.84  | 7.9E-27 | 1.68  | 0.75  | 2.7E-21 |
| Noc4l    | 2059  | 1.39  | 0.48  | 6.6E-05 | 1.30  | 0.38  | 1.8E-03 |
| Noct     | 2475  | 1.53  | 0.61  | 4.3E-04 | 1.44  | 0.52  | 2.8E-03 |
| Nod1     | 332   | -1.51 | -0.59 | 2.2E-03 | -1.47 | -0.55 | 4.6E-03 |
| Nod2     | 134   | 6.06  | 2.60  | 2.1E-35 | 5.68  | 2.51  | 9.9E-33 |
| Nog      | 443   | -1.55 | -0.63 | 2.8E-06 | -1.53 | -0.62 | 4.6E-06 |
| Nol7     | 4572  | -1.34 | -0.42 | 4.2E-04 | -1.43 | -0.52 | 1.4E-05 |
| Nolc1    | 10912 | 1.47  | 0.56  | 1.7E-08 | 1.35  | 0.44  | 1.5E-05 |
| Nomo1    | 6606  | 1.70  | 0.76  | 2.5E-12 | 1.57  | 0.65  | 3.4E-09 |

|          |       |       |       |          |       |       |          |
|----------|-------|-------|-------|----------|-------|-------|----------|
| Nono     | 51016 | -1.20 | -0.26 | 1.0E-02  | -1.26 | -0.34 | 7.0E-04  |
| Nop10    | 3193  | 1.49  | 0.58  | 1.3E-06  | 1.38  | 0.46  | 1.5E-04  |
| Nop14    | 4335  | 1.33  | 0.41  | 2.0E-08  | 1.29  | 0.37  | 4.4E-07  |
| Nop16    | 2542  | 1.36  | 0.45  | 1.6E-06  | 1.29  | 0.37  | 8.8E-05  |
| Nop53    | 4778  | -1.53 | -0.62 | 3.6E-12  | -1.67 | -0.74 | 5.0E-17  |
| Nop9     | 3755  | 1.48  | 0.57  | 2.3E-09  | 1.32  | 0.40  | 2.8E-05  |
| Nopchap1 | 9108  | 2.12  | 1.08  | 2.7E-36  | 2.07  | 1.05  | 6.9E-34  |
| Nos3     | 594   | -1.97 | -0.98 | 8.6E-15  | -2.23 | -1.16 | 3.7E-20  |
| Nosip    | 1793  | -1.60 | -0.68 | 2.9E-24  | -1.65 | -0.72 | 2.3E-27  |
| Notch3   | 7321  | -1.95 | -0.96 | 1.0E-08  | -2.07 | -1.05 | 3.8E-10  |
| Notch4   | 758   | -2.88 | -1.52 | 1.2E-31  | -3.18 | -1.67 | 1.1E-37  |
| Nova1    | 10201 | -1.90 | -0.92 | 1.3E-05  | -1.83 | -0.87 | 4.2E-05  |
| Nox4     | 332   | -2.82 | -1.50 | 2.6E-27  | -2.71 | -1.44 | 5.6E-25  |
| Noxo1    | 262   | -1.28 | -0.35 | 1.3E-03  | -1.27 | -0.35 | 1.7E-03  |
| Noxred1  | 289   | 1.80  | 0.85  | 4.9E-10  | 1.86  | 0.90  | 4.6E-11  |
| Npas1    | 195   | 3.74  | 1.90  | 1.7E-10  | 3.38  | 1.76  | 4.0E-09  |
| Npat     | 5328  | 1.47  | 0.55  | 8.5E-07  | 1.59  | 0.67  | 1.7E-09  |
| Npc1     | 5127  | 1.74  | 0.80  | 2.8E-25  | 1.78  | 0.83  | 2.4E-27  |
| Npepl1   | 1632  | -1.80 | -0.85 | 6.6E-17  | -2.01 | -1.01 | 4.3E-23  |
| Nphp1    | 1991  | -1.32 | -0.40 | 1.8E-03  | -1.40 | -0.49 | 9.7E-05  |
| Nphp3    | 1933  | 1.89  | 0.92  | 1.2E-26  | 1.93  | 0.95  | 5.3E-28  |
| Nphp4    | 1152  | 1.44  | 0.52  | 2.4E-04  | 1.35  | 0.43  | 2.7E-03  |
| Npl      | 736   | 2.03  | 1.02  | 2.8E-11  | 1.96  | 0.97  | 2.1E-10  |
| Npm2     | 167   | 1.56  | 0.64  | 7.0E-06  | 1.67  | 0.74  | 2.2E-07  |
| Npr2     | 2976  | -1.77 | -0.82 | 4.2E-12  | -1.67 | -0.74 | 5.3E-10  |
| Npr3     | 1342  | -2.27 | -1.18 | 2.7E-06  | -1.91 | -0.94 | 2.6E-04  |
| Nprl2    | 2232  | 1.98  | 0.98  | 1.2E-34  | 1.96  | 0.97  | 5.2E-34  |
| Nprl3    | 1675  | -1.37 | -0.45 | 3.3E-11  | -1.29 | -0.37 | 1.2E-07  |
| Nptn     | 7273  | 1.40  | 0.48  | 3.3E-05  | 1.51  | 0.59  | 2.5E-07  |
| Nptx2    | 633   | 2.73  | 1.45  | 1.4E-30  | 2.31  | 1.21  | 1.4E-21  |
| Nqo1     | 194   | -1.64 | -0.72 | 3.9E-03  | -1.59 | -0.67 | 7.6E-03  |
| Nqo2     | 832   | -1.51 | -0.59 | 7.4E-05  | -1.49 | -0.58 | 1.2E-04  |
| Nr1d1    | 234   | 2.42  | 1.27  | 2.9E-08  | 2.09  | 1.06  | 4.4E-06  |
| Nr2c1    | 1652  | -1.35 | -0.44 | 1.7E-10  | -1.45 | -0.53 | 3.8E-15  |
| Nr2c2    | 11778 | -1.37 | -0.46 | 3.7E-04  | -1.35 | -0.43 | 8.9E-04  |
| Nr2c2ap  | 1179  | 1.88  | 0.91  | 4.7E-25  | 1.77  | 0.82  | 1.2E-20  |
| Nr2f1    | 15518 | -1.63 | -0.70 | 9.4E-06  | -1.93 | -0.95 | 1.2E-09  |
| Nr2f6    | 2061  | 1.42  | 0.50  | 1.7E-04  | 1.34  | 0.42  | 2.1E-03  |
| Nr3c2    | 254   | 2.04  | 1.03  | 7.0E-04  | 2.10  | 1.07  | 4.3E-04  |
| Nr4a3    | 749   | 1.52  | 0.61  | 1.5E-02  | 1.66  | 0.74  | 3.0E-03  |
| Nr5a2    | 292   | -1.71 | -0.77 | 8.8E-04  | -1.47 | -0.56 | 2.0E-02  |
| Nr6a1    | 1821  | 3.70  | 1.89  | 6.5E-75  | 3.87  | 1.95  | 1.0E-79  |
| Nradd    | 814   | -1.49 | -0.57 | 5.4E-07  | -1.51 | -0.59 | 2.1E-07  |
| Nrarp    | 4113  | -1.29 | -0.37 | 4.1E-02  | -1.46 | -0.55 | 1.8E-03  |
| Nras     | 15777 | -1.36 | -0.44 | 4.5E-09  | -1.42 | -0.51 | 1.2E-11  |
| Nrde2    | 1295  | -4.22 | -2.08 | 2.7E-140 | -4.02 | -2.01 | 5.3E-131 |
| Nrep     | 61680 | -1.33 | -0.41 | 3.0E-04  | -1.28 | -0.36 | 2.1E-03  |

|          |       |       |       |         |       |       |         |
|----------|-------|-------|-------|---------|-------|-------|---------|
| Nrg2     | 164   | 1.68  | 0.75  | 2.0E-03 | 1.55  | 0.63  | 9.6E-03 |
| Nrgn     | 312   | 1.79  | 0.84  | 1.4E-04 | 2.09  | 1.06  | 1.3E-06 |
| Nrip3    | 979   | 6.35  | 2.67  | 4.5E-53 | 7.23  | 2.85  | 3.0E-60 |
| Nrn1     | 2888  | -1.93 | -0.95 | 3.8E-05 | -1.94 | -0.96 | 3.0E-05 |
| Nrp1     | 3191  | -2.00 | -1.00 | 2.8E-06 | -1.69 | -0.76 | 5.2E-04 |
| Nrros    | 320   | -1.59 | -0.67 | 4.6E-07 | -1.60 | -0.67 | 3.8E-07 |
| Nrsn1    | 1282  | 1.57  | 0.65  | 7.9E-03 | 1.53  | 0.61  | 1.3E-02 |
| Nrtm     | 152   | 3.30  | 1.72  | 1.8E-14 | 3.79  | 1.92  | 2.4E-17 |
| Nsd1     | 20486 | -1.74 | -0.80 | 2.9E-11 | -1.58 | -0.66 | 4.4E-08 |
| Nsd2     | 33101 | -1.33 | -0.41 | 1.0E-04 | -1.28 | -0.35 | 9.4E-04 |
| Nsd3     | 13338 | 1.48  | 0.56  | 1.8E-14 | 1.54  | 0.62  | 1.8E-17 |
| Nsdhl    | 3385  | 1.40  | 0.48  | 2.0E-04 | 1.27  | 0.35  | 8.8E-03 |
| Nsf      | 7264  | 1.50  | 0.58  | 5.2E-09 | 1.48  | 0.57  | 1.1E-08 |
| Nsg1     | 13587 | -2.14 | -1.10 | 3.4E-07 | -2.10 | -1.07 | 6.6E-07 |
| Nsmaf    | 2891  | -2.15 | -1.10 | 4.1E-38 | -2.08 | -1.05 | 1.1E-34 |
| Nsmce1   | 1642  | -1.68 | -0.74 | 1.9E-16 | -1.72 | -0.78 | 3.9E-18 |
| Nsmce3   | 1585  | 1.44  | 0.53  | 1.8E-18 | 1.36  | 0.44  | 2.3E-13 |
| Nsmf     | 6084  | 1.32  | 0.40  | 1.3E-03 | 1.34  | 0.43  | 6.8E-04 |
| Nsun3    | 954   | -1.42 | -0.50 | 2.3E-07 | -1.46 | -0.54 | 1.8E-08 |
| Nsun4    | 1118  | -1.41 | -0.50 | 7.2E-08 | -1.49 | -0.58 | 3.1E-10 |
| Nsun6    | 1295  | 1.22  | 0.29  | 1.4E-02 | 1.34  | 0.42  | 3.5E-04 |
| Nt5c     | 1466  | -1.55 | -0.64 | 8.8E-15 | -1.60 | -0.68 | 1.2E-16 |
| Nt5c3b   | 3341  | -1.40 | -0.49 | 1.4E-16 | -1.42 | -0.51 | 3.8E-18 |
| Nt5dc2   | 12248 | 1.42  | 0.51  | 2.6E-05 | 1.28  | 0.36  | 3.9E-03 |
| Nt5dc3   | 3561  | 2.26  | 1.18  | 1.8E-06 | 2.36  | 1.24  | 5.0E-07 |
| Nt5m     | 950   | -1.98 | -0.99 | 1.8E-25 | -2.05 | -1.04 | 4.6E-28 |
| Ntan1    | 3319  | -1.28 | -0.35 | 2.5E-06 | -1.28 | -0.35 | 2.3E-06 |
| Nthl1    | 501   | -1.30 | -0.38 | 5.3E-03 | -1.57 | -0.65 | 9.7E-07 |
| Ntmt1    | 2942  | 1.58  | 0.66  | 2.7E-14 | 1.51  | 0.60  | 1.1E-11 |
| Ntn3     | 1021  | -1.57 | -0.65 | 1.1E-02 | -1.65 | -0.72 | 4.6E-03 |
| Ntn4     | 1222  | -1.88 | -0.91 | 2.1E-07 | -2.09 | -1.06 | 1.1E-09 |
| Nubp1    | 1694  | -2.10 | -1.07 | 7.4E-27 | -2.41 | -1.27 | 3.3E-37 |
| Nubp2    | 2616  | 1.91  | 0.94  | 2.0E-20 | 1.72  | 0.79  | 1.1E-14 |
| Nucb1    | 6531  | 1.42  | 0.51  | 9.0E-06 | 1.34  | 0.43  | 2.2E-04 |
| Nucb2    | 1637  | 1.21  | 0.28  | 1.0E-03 | 1.28  | 0.36  | 1.8E-05 |
| Nucks1   | 17329 | -1.39 | -0.47 | 2.4E-03 | -1.66 | -0.73 | 1.4E-06 |
| Nudcd1   | 4209  | 1.44  | 0.52  | 2.1E-07 | 1.42  | 0.51  | 4.4E-07 |
| Nudt1    | 677   | -2.08 | -1.05 | 4.1E-16 | -2.32 | -1.21 | 6.8E-21 |
| Nudt11   | 3096  | 1.40  | 0.48  | 2.3E-04 | 1.40  | 0.49  | 2.1E-04 |
| Nudt12   | 918   | 1.52  | 0.61  | 1.0E-11 | 1.58  | 0.66  | 8.9E-14 |
| Nudt14   | 674   | -1.22 | -0.29 | 4.8E-03 | -1.35 | -0.43 | 1.2E-05 |
| Nudt15   | 319   | -5.35 | -2.42 | 7.3E-57 | -5.27 | -2.40 | 1.1E-55 |
| Nudt16   | 567   | -1.23 | -0.30 | 3.6E-03 | -1.34 | -0.42 | 2.8E-05 |
| Nudt16l1 | 2640  | -1.28 | -0.36 | 1.4E-07 | -1.31 | -0.39 | 7.4E-09 |
| Nudt18   | 815   | 2.34  | 1.23  | 8.7E-53 | 2.16  | 1.11  | 2.0E-43 |
| Nudt21   | 15711 | 1.27  | 0.34  | 1.9E-04 | 1.26  | 0.34  | 2.5E-04 |
| Nudt22   | 893   | 2.70  | 1.43  | 9.1E-33 | 2.52  | 1.34  | 2.1E-28 |

|         |       |       |       |          |       |       |          |
|---------|-------|-------|-------|----------|-------|-------|----------|
| Nudt3   | 6450  | -1.81 | -0.85 | 9.7E-08  | -1.84 | -0.88 | 3.7E-08  |
| Nudt7   | 428   | 1.62  | 0.70  | 9.0E-07  | 1.65  | 0.73  | 3.0E-07  |
| Nuf2    | 4458  | -1.48 | -0.57 | 3.8E-03  | -1.65 | -0.72 | 1.9E-04  |
| Numa1   | 17622 | -1.79 | -0.84 | 9.1E-25  | -1.73 | -0.79 | 6.3E-22  |
| Numb    | 4118  | 1.78  | 0.83  | 1.7E-17  | 1.69  | 0.76  | 1.6E-14  |
| Nup205  | 10236 | -1.54 | -0.62 | 2.4E-08  | -1.43 | -0.52 | 4.6E-06  |
| Nup210  | 3981  | -1.32 | -0.41 | 1.9E-03  | -1.46 | -0.55 | 2.2E-05  |
| Nup210l | 725   | 2.71  | 1.44  | 2.5E-37  | 2.93  | 1.55  | 7.6E-43  |
| Nup37   | 1515  | -1.35 | -0.43 | 1.4E-02  | -1.41 | -0.50 | 4.1E-03  |
| Nup62cl | 337   | 4.31  | 2.11  | 3.0E-24  | 4.03  | 2.01  | 2.6E-22  |
| Nup93   | 7692  | 1.62  | 0.70  | 6.5E-09  | 1.50  | 0.59  | 1.3E-06  |
| Nupl2   | 803   | -1.48 | -0.57 | 1.8E-19  | -1.54 | -0.63 | 2.0E-23  |
| Nwd1    | 819   | 1.83  | 0.87  | 4.2E-03  | 2.17  | 1.12  | 1.8E-04  |
| Nwd2    | 615   | -2.83 | -1.50 | 2.4E-05  | -2.31 | -1.21 | 8.6E-04  |
| Nxf1    | 17752 | 1.27  | 0.35  | 4.8E-08  | 1.26  | 0.34  | 1.6E-07  |
| Nxn     | 6394  | 1.35  | 0.43  | 1.9E-03  | 1.25  | 0.33  | 2.2E-02  |
| Nxpe3   | 1146  | 1.93  | 0.95  | 1.3E-47  | 1.84  | 0.88  | 6.4E-41  |
| Nxph1   | 911   | -2.60 | -1.38 | 8.0E-07  | -2.48 | -1.31 | 3.3E-06  |
| Nxph3   | 459   | 2.53  | 1.34  | 4.6E-11  | 2.29  | 1.20  | 5.4E-09  |
| Oasl2   | 117   | -3.25 | -1.70 | 4.1E-14  | -2.21 | -1.14 | 3.9E-07  |
| Oaz2    | 10228 | 1.33  | 0.41  | 1.9E-24  | 1.32  | 0.40  | 3.6E-24  |
| Obscn   | 125   | -3.39 | -1.76 | 1.6E-02  | -2.90 | -1.53 | 4.1E-02  |
| Obsl1   | 3857  | -2.18 | -1.13 | 4.5E-09  | -2.29 | -1.20 | 4.2E-10  |
| Ocel1   | 242   | -1.85 | -0.89 | 6.2E-05  | -1.78 | -0.83 | 1.9E-04  |
| Ociad2  | 772   | -1.48 | -0.56 | 4.8E-08  | -1.47 | -0.55 | 7.8E-08  |
| Odad1   | 464   | 1.32  | 0.40  | 2.5E-03  | 1.35  | 0.43  | 1.2E-03  |
| Odad3   | 507   | 1.42  | 0.51  | 6.9E-05  | 1.35  | 0.43  | 9.3E-04  |
| Odc1    | 24222 | 1.49  | 0.58  | 5.0E-06  | 1.43  | 0.52  | 5.3E-05  |
| Odf2    | 13484 | 1.55  | 0.63  | 2.7E-14  | 1.51  | 0.60  | 5.8E-13  |
| Odf2l   | 2956  | -1.91 | -0.93 | 1.2E-26  | -1.80 | -0.85 | 3.6E-22  |
| Odr4    | 2639  | -1.84 | -0.88 | 1.4E-44  | -1.76 | -0.82 | 2.1E-38  |
| Ofd1    | 2004  | -1.35 | -0.44 | 8.8E-09  | -1.34 | -0.42 | 2.4E-08  |
| Ogfod1  | 3673  | 2.50  | 1.32  | 6.9E-101 | 2.53  | 1.34  | 1.6E-103 |
| Ogfod2  | 1349  | 2.09  | 1.07  | 3.6E-27  | 1.95  | 0.97  | 1.8E-22  |
| Ogfod3  | 349   | -1.89 | -0.92 | 2.9E-28  | -2.04 | -1.03 | 4.6E-36  |
| Ogfr    | 5977  | -1.19 | -0.25 | 8.5E-04  | -1.30 | -0.38 | 3.5E-07  |
| Ogfrl1  | 2898  | 1.74  | 0.80  | 3.5E-28  | 1.73  | 0.79  | 1.1E-27  |
| Ogn     | 2623  | -3.11 | -1.64 | 1.4E-04  | -2.74 | -1.45 | 8.3E-04  |
| Ogt     | 39637 | -1.51 | -0.60 | 1.5E-06  | -1.30 | -0.38 | 2.8E-03  |
| Ola1    | 7123  | 1.44  | 0.53  | 4.7E-10  | 1.38  | 0.46  | 7.2E-08  |
| Olfml2a | 1014  | -2.01 | -1.01 | 6.4E-04  | -2.06 | -1.04 | 4.0E-04  |
| Olfml2b | 548   | -1.51 | -0.59 | 5.4E-03  | -1.37 | -0.45 | 3.9E-02  |
| Olfml3  | 1215  | -2.55 | -1.35 | 1.4E-05  | -2.47 | -1.31 | 2.9E-05  |
| Olig1   | 341   | 2.11  | 1.08  | 7.4E-05  | 1.49  | 0.58  | 4.5E-02  |
| Oma1    | 501   | -1.32 | -0.40 | 2.4E-05  | -1.42 | -0.50 | 6.0E-08  |
| Onecut2 | 6783  | 1.40  | 0.48  | 1.2E-02  | 1.56  | 0.64  | 7.2E-04  |
| Ooep    | 292   | -1.33 | -0.41 | 1.5E-03  | -1.33 | -0.42 | 1.4E-03  |



|         |       |       |       |         |       |       |         |
|---------|-------|-------|-------|---------|-------|-------|---------|
| Opa3    | 3112  | -1.80 | -0.84 | 1.1E-19 | -2.00 | -1.00 | 5.1E-27 |
| Opn3    | 438   | 2.62  | 1.39  | 1.3E-19 | 2.42  | 1.28  | 1.1E-16 |
| Oprk1   | 186   | 2.83  | 1.50  | 4.7E-19 | 2.84  | 1.51  | 4.2E-19 |
| Oprl1   | 3489  | -1.91 | -0.94 | 4.2E-05 | -1.76 | -0.82 | 4.1E-04 |
| Optc    | 245   | -1.82 | -0.86 | 1.3E-08 | -1.55 | -0.63 | 4.2E-05 |
| Optn    | 910   | 3.27  | 1.71  | 3.7E-58 | 3.23  | 1.69  | 5.0E-57 |
| Orai1   | 674   | 2.23  | 1.16  | 3.1E-34 | 2.18  | 1.12  | 2.8E-32 |
| Orai2   | 2262  | 1.43  | 0.52  | 2.0E-04 | 1.47  | 0.55  | 7.7E-05 |
| Orai3   | 822   | 1.72  | 0.79  | 5.6E-10 | 1.73  | 0.79  | 3.8E-10 |
| Orc1    | 857   | 1.62  | 0.69  | 4.8E-03 | 1.52  | 0.60  | 1.6E-02 |
| Orc3    | 5370  | -1.49 | -0.57 | 1.0E-08 | -1.42 | -0.51 | 3.8E-07 |
| Orc4    | 7212  | 1.35  | 0.43  | 5.6E-09 | 1.40  | 0.48  | 7.6E-11 |
| Ormdl2  | 1450  | 2.52  | 1.33  | 3.2E-20 | 2.47  | 1.30  | 2.2E-19 |
| Ormdl3  | 5815  | 1.81  | 0.86  | 1.7E-28 | 1.69  | 0.76  | 2.0E-22 |
| Os9     | 10969 | 1.57  | 0.65  | 2.1E-16 | 1.56  | 0.64  | 7.7E-16 |
| Osbpl10 | 323   | -2.02 | -1.01 | 7.4E-12 | -2.16 | -1.11 | 5.9E-14 |
| Osbpl11 | 3981  | 1.29  | 0.36  | 2.9E-09 | 1.25  | 0.32  | 1.6E-07 |
| Osbpl2  | 4577  | 1.60  | 0.68  | 1.5E-22 | 1.54  | 0.62  | 2.8E-19 |
| Osbpl3  | 2059  | 1.82  | 0.86  | 3.8E-32 | 1.76  | 0.81  | 1.1E-28 |
| Osbpl5  | 2180  | -1.44 | -0.52 | 4.4E-05 | -1.36 | -0.45 | 6.1E-04 |
| Osbpl7  | 1261  | 1.29  | 0.36  | 1.2E-04 | 1.23  | 0.30  | 2.0E-03 |
| Oscar   | 117   | 2.73  | 1.45  | 1.8E-17 | 2.83  | 1.50  | 4.9E-18 |
| Oser1   | 1651  | 1.31  | 0.39  | 1.8E-05 | 1.21  | 0.27  | 3.0E-03 |
| Osr1    | 634   | -2.97 | -1.57 | 1.0E-06 | -2.98 | -1.57 | 1.1E-06 |
| Osr2    | 404   | -3.54 | -1.83 | 1.7E-02 | -2.96 | -1.57 | 4.4E-02 |
| Ostf1   | 1558  | 1.82  | 0.87  | 5.3E-12 | 1.85  | 0.89  | 1.3E-12 |
| Ostm1   | 4094  | 2.45  | 1.29  | 1.2E-52 | 2.36  | 1.24  | 3.0E-48 |
| Otor    | 240   | -2.88 | -1.52 | 3.1E-04 | -3.15 | -1.65 | 8.8E-05 |
| Otp     | 1318  | -2.64 | -1.40 | 2.1E-08 | -2.31 | -1.21 | 1.8E-06 |
| Otub1   | 6816  | -1.40 | -0.49 | 2.4E-13 | -1.43 | -0.52 | 7.4E-15 |
| Otub2   | 1001  | -1.38 | -0.46 | 9.9E-10 | -1.39 | -0.48 | 2.0E-10 |
| Otud1   | 309   | 1.79  | 0.84  | 4.9E-11 | 1.67  | 0.74  | 8.2E-09 |
| Otud3   | 956   | 1.51  | 0.59  | 9.3E-08 | 1.60  | 0.67  | 1.0E-09 |
| Otud7b  | 5002  | 1.25  | 0.32  | 2.1E-04 | 1.22  | 0.28  | 1.2E-03 |
| Otulin  | 1414  | 1.37  | 0.46  | 4.6E-06 | 1.26  | 0.33  | 1.4E-03 |
| Otulinl | 587   | 1.90  | 0.93  | 4.9E-11 | 1.81  | 0.86  | 1.4E-09 |
| Ovgp1   | 794   | 2.58  | 1.37  | 1.7E-27 | 2.72  | 1.45  | 1.4E-30 |
| Oxld1   | 146   | -1.43 | -0.52 | 1.7E-04 | -1.29 | -0.37 | 9.1E-03 |
| Oxsm    | 612   | -1.24 | -0.31 | 3.2E-04 | -1.28 | -0.35 | 3.0E-05 |
| Oxsr1   | 9488  | 1.67  | 0.74  | 1.9E-44 | 1.57  | 0.65  | 9.2E-35 |
| P2rx4   | 252   | -2.71 | -1.44 | 4.0E-20 | -2.71 | -1.44 | 6.0E-20 |
| P2rx7   | 210   | -2.26 | -1.18 | 6.8E-06 | -1.67 | -0.74 | 6.3E-03 |
| P2ry1   | 533   | 1.31  | 0.39  | 3.2E-04 | 1.32  | 0.41  | 1.9E-04 |
| P2ry12  | 179   | -1.99 | -1.00 | 2.4E-09 | -2.31 | -1.21 | 5.2E-13 |
| P3h1    | 2999  | 1.41  | 0.49  | 1.1E-02 | 1.35  | 0.43  | 2.7E-02 |
| P3h2    | 397   | -2.34 | -1.22 | 3.5E-08 | -2.28 | -1.19 | 9.9E-08 |
| P3h3    | 3650  | -1.85 | -0.89 | 3.1E-11 | -1.90 | -0.93 | 3.2E-12 |

|          |       |       |       |         |       |       |         |
|----------|-------|-------|-------|---------|-------|-------|---------|
| P4ha3    | 971   | -2.60 | -1.38 | 3.9E-07 | -2.45 | -1.29 | 2.0E-06 |
| P4htm    | 556   | -1.52 | -0.60 | 3.7E-05 | -1.59 | -0.67 | 4.3E-06 |
| Pa2g4    | 14613 | 1.35  | 0.43  | 2.2E-05 | 1.22  | 0.29  | 5.8E-03 |
| Pabpc1l  | 274   | 4.48  | 2.16  | 2.0E-53 | 3.41  | 1.77  | 5.4E-37 |
| Pabpc4l  | 818   | -1.50 | -0.59 | 4.0E-03 | -1.38 | -0.46 | 2.7E-02 |
| Pabpn1   | 4363  | -1.30 | -0.38 | 6.8E-03 | -1.41 | -0.50 | 2.7E-04 |
| Pacsin2  | 4329  | 1.44  | 0.53  | 6.0E-07 | 1.34  | 0.42  | 8.1E-05 |
| Paf1     | 7865  | 2.08  | 1.06  | 2.0E-50 | 1.93  | 0.95  | 1.8E-40 |
| Pafah1b1 | 29765 | -1.30 | -0.38 | 1.1E-04 | -1.25 | -0.32 | 1.5E-03 |
| Pafah2   | 1333  | 1.56  | 0.64  | 3.2E-13 | 1.49  | 0.57  | 8.3E-11 |
| Pag1     | 4748  | 1.91  | 0.93  | 6.8E-09 | 2.03  | 1.02  | 1.5E-10 |
| Paics    | 23426 | 1.29  | 0.37  | 1.4E-02 | 1.27  | 0.34  | 2.3E-02 |
| Paip1    | 12566 | -1.36 | -0.45 | 2.2E-03 | -1.61 | -0.69 | 1.2E-06 |
| Paip2    | 14026 | -1.31 | -0.39 | 7.4E-09 | -1.29 | -0.36 | 5.8E-08 |
| Paip2b   | 12791 | 1.56  | 0.64  | 4.0E-28 | 1.56  | 0.64  | 1.8E-28 |
| Pak1ip1  | 3967  | 1.36  | 0.45  | 3.0E-05 | 1.34  | 0.42  | 9.0E-05 |
| Pak4     | 1502  | -1.70 | -0.76 | 7.4E-07 | -1.95 | -0.96 | 3.1E-10 |
| Pak5     | 2953  | -1.54 | -0.62 | 6.4E-04 | -1.45 | -0.53 | 3.8E-03 |
| Pakap    | 139   | -2.79 | -1.48 | 1.9E-03 | -2.35 | -1.23 | 1.1E-02 |
| Pald1    | 3174  | 1.53  | 0.62  | 3.3E-07 | 1.50  | 0.58  | 1.5E-06 |
| Palm3    | 720   | 1.99  | 0.99  | 7.7E-06 | 1.89  | 0.92  | 4.2E-05 |
| Palmd    | 688   | -2.10 | -1.07 | 2.4E-07 | -1.87 | -0.90 | 1.5E-05 |
| Pals1    | 5339  | 1.45  | 0.53  | 1.6E-11 | 1.60  | 0.68  | 5.5E-18 |
| Pam      | 5537  | -1.30 | -0.38 | 2.4E-06 | -1.31 | -0.39 | 8.8E-07 |
| Pan2     | 5265  | -1.91 | -0.94 | 2.1E-30 | -2.04 | -1.03 | 2.9E-36 |
| Pan3     | 5259  | -1.26 | -0.33 | 1.0E-03 | -1.32 | -0.40 | 7.0E-05 |
| Pank1    | 1648  | -1.41 | -0.50 | 6.8E-09 | -1.54 | -0.63 | 1.2E-13 |
| Pank4    | 3261  | -1.31 | -0.39 | 1.8E-14 | -1.26 | -0.34 | 6.3E-11 |
| Panx1    | 6792  | -1.42 | -0.51 | 4.6E-03 | -1.42 | -0.51 | 4.7E-03 |
| Panx2    | 332   | -1.84 | -0.88 | 1.0E-03 | -1.81 | -0.85 | 1.5E-03 |
| Paox     | 1233  | 1.77  | 0.83  | 9.4E-24 | 1.68  | 0.75  | 1.6E-19 |
| Pappa    | 1006  | -2.45 | -1.29 | 3.1E-13 | -2.50 | -1.32 | 9.2E-14 |
| Papss1   | 8672  | 1.50  | 0.58  | 8.4E-30 | 1.44  | 0.53  | 1.7E-24 |
| Papss2   | 732   | -5.25 | -2.39 | 1.2E-05 | -5.18 | -2.37 | 1.5E-05 |
| Paqr3    | 2037  | 2.03  | 1.02  | 5.0E-23 | 2.12  | 1.08  | 1.6E-25 |
| Paqr4    | 2309  | 1.91  | 0.94  | 2.9E-28 | 1.79  | 0.84  | 8.0E-23 |
| Paqr8    | 2154  | -1.37 | -0.46 | 6.3E-04 | -1.35 | -0.43 | 1.3E-03 |
| Pard3    | 5859  | -1.41 | -0.50 | 8.8E-16 | -1.46 | -0.54 | 1.2E-18 |
| Pard6b   | 1257  | 1.96  | 0.97  | 3.1E-13 | 1.69  | 0.76  | 2.0E-08 |
| Pard6g   | 4629  | 1.25  | 0.32  | 1.2E-04 | 1.16  | 0.21  | 1.4E-02 |
| Parl     | 2551  | -1.21 | -0.28 | 7.2E-03 | -1.27 | -0.35 | 6.7E-04 |
| Parn     | 2294  | -1.63 | -0.70 | 1.2E-24 | -1.75 | -0.81 | 2.7E-32 |
| Parp11   | 4400  | -1.84 | -0.88 | 5.8E-21 | -1.80 | -0.85 | 1.7E-19 |
| Parp12   | 362   | -2.81 | -1.49 | 5.0E-23 | -2.74 | -1.46 | 7.7E-22 |
| Parp14   | 138   | -2.69 | -1.43 | 5.3E-09 | -2.03 | -1.02 | 3.7E-05 |
| Parp2    | 2664  | -1.60 | -0.68 | 3.0E-13 | -1.66 | -0.73 | 3.9E-15 |
| Parp8    | 1728  | -2.15 | -1.10 | 7.7E-17 | -1.99 | -0.99 | 7.2E-14 |

|          |       |       |       |         |       |       |         |
|----------|-------|-------|-------|---------|-------|-------|---------|
| Parp9    | 269   | -2.70 | -1.43 | 3.1E-26 | -3.01 | -1.59 | 8.6E-32 |
| Parva    | 8020  | -1.52 | -0.60 | 1.3E-03 | -1.59 | -0.67 | 3.4E-04 |
| Pate2    | 225   | 1.31  | 0.39  | 5.5E-03 | 1.34  | 0.42  | 2.3E-03 |
| Patj     | 1326  | -2.29 | -1.20 | 1.3E-31 | -2.20 | -1.14 | 1.1E-28 |
| Patz1    | 5862  | -2.10 | -1.07 | 2.1E-22 | -2.31 | -1.21 | 2.9E-28 |
| Pawr     | 1151  | 2.37  | 1.25  | 4.8E-16 | 2.11  | 1.08  | 2.8E-12 |
| Pax7     | 1240  | -1.74 | -0.80 | 3.4E-03 | -1.68 | -0.75 | 7.0E-03 |
| Paxx     | 871   | -1.37 | -0.45 | 2.8E-03 | -1.47 | -0.55 | 2.3E-04 |
| Pbld2    | 122   | -1.30 | -0.38 | 1.8E-02 | -1.28 | -0.35 | 2.7E-02 |
| Pbrm1    | 15819 | -2.07 | -1.05 | 4.6E-26 | -1.93 | -0.95 | 1.9E-21 |
| Pbx2     | 7483  | -1.51 | -0.60 | 1.4E-05 | -1.78 | -0.83 | 7.6E-10 |
| Pbx4     | 1111  | 2.22  | 1.15  | 1.2E-13 | 2.05  | 1.03  | 3.1E-11 |
| Pbxip1   | 2932  | 1.44  | 0.52  | 8.7E-04 | 1.41  | 0.50  | 1.6E-03 |
| Pcbd1    | 282   | -1.63 | -0.70 | 5.6E-07 | -1.51 | -0.60 | 2.6E-05 |
| Pcbd2    | 201   | -1.27 | -0.34 | 5.0E-02 | -1.31 | -0.39 | 2.5E-02 |
| Pcbp1    | 13191 | -1.58 | -0.66 | 3.0E-09 | -1.78 | -0.83 | 4.8E-14 |
| Pcbp2    | 24042 | -1.18 | -0.24 | 3.6E-02 | -1.30 | -0.38 | 6.7E-04 |
| Pcbp3    | 3242  | 2.03  | 1.02  | 6.0E-21 | 1.96  | 0.97  | 4.3E-19 |
| Pcca     | 2377  | 1.50  | 0.59  | 4.9E-07 | 1.51  | 0.59  | 4.8E-07 |
| Pccb     | 2484  | -1.67 | -0.74 | 1.1E-47 | -1.81 | -0.86 | 4.0E-63 |
| Pcdh10   | 8761  | 1.47  | 0.55  | 4.4E-03 | 1.54  | 0.62  | 1.4E-03 |
| Pcdh17   | 5315  | 1.73  | 0.79  | 7.1E-05 | 1.84  | 0.88  | 9.4E-06 |
| Pcdh18   | 7448  | -1.70 | -0.76 | 1.9E-06 | -1.57 | -0.65 | 5.6E-05 |
| Pcdh20   | 515   | 2.08  | 1.06  | 8.0E-08 | 2.36  | 1.24  | 2.5E-10 |
| Pcdha11  | 113   | -2.30 | -1.20 | 2.5E-04 | -1.94 | -0.95 | 4.1E-03 |
| Pcdha3   | 113   | -2.00 | -1.00 | 1.2E-03 | -1.97 | -0.98 | 1.7E-03 |
| Pcdha7   | 112   | -1.90 | -0.93 | 1.3E-02 | -2.01 | -1.01 | 6.8E-03 |
| Pcdhb10  | 103   | -2.97 | -1.57 | 1.4E-13 | -3.10 | -1.63 | 1.5E-14 |
| Pcdhb11  | 128   | -2.48 | -1.31 | 1.1E-04 | -2.58 | -1.36 | 5.5E-05 |
| Pcdhb14  | 113   | -2.68 | -1.42 | 1.7E-07 | -2.56 | -1.35 | 6.9E-07 |
| Pcdhb16  | 221   | -3.44 | -1.78 | 1.5E-07 | -2.48 | -1.31 | 1.5E-04 |
| Pcdhb17  | 469   | -3.05 | -1.61 | 6.5E-11 | -2.53 | -1.34 | 6.8E-08 |
| Pcdhb18  | 214   | -2.69 | -1.43 | 5.7E-06 | -2.31 | -1.21 | 1.5E-04 |
| Pcdhb19  | 430   | -3.22 | -1.69 | 5.0E-07 | -2.44 | -1.29 | 1.6E-04 |
| Pcdhb20  | 386   | -2.84 | -1.51 | 1.3E-07 | -2.54 | -1.34 | 2.7E-06 |
| Pcdhb21  | 150   | -2.89 | -1.53 | 3.0E-05 | -2.23 | -1.16 | 2.0E-03 |
| Pcdhb22  | 483   | -2.04 | -1.03 | 3.7E-06 | -2.04 | -1.03 | 3.7E-06 |
| Pcdhb3   | 192   | -3.13 | -1.65 | 3.4E-17 | -2.79 | -1.48 | 3.1E-14 |
| Pcdhb4   | 178   | -2.75 | -1.46 | 2.3E-10 | -2.71 | -1.44 | 5.2E-10 |
| Pcdhb5   | 218   | -2.75 | -1.46 | 2.6E-10 | -2.61 | -1.38 | 2.3E-09 |
| Pcdhb6   | 116   | -2.96 | -1.57 | 2.4E-11 | -2.78 | -1.47 | 3.5E-10 |
| Pcdhb7   | 405   | -2.66 | -1.41 | 1.3E-09 | -2.23 | -1.15 | 9.5E-07 |
| Pcdhb8   | 178   | -3.02 | -1.59 | 1.1E-13 | -2.75 | -1.46 | 8.5E-12 |
| Pcdhb9   | 192   | -3.24 | -1.69 | 2.5E-10 | -2.84 | -1.51 | 2.0E-08 |
| Pcdhga1  | 217   | -1.80 | -0.85 | 2.7E-06 | -1.54 | -0.62 | 8.7E-04 |
| Pcdhga10 | 517   | -1.61 | -0.69 | 3.6E-11 | -1.59 | -0.67 | 1.6E-10 |
| Pcdhga11 | 947   | -2.05 | -1.04 | 6.7E-14 | -2.11 | -1.08 | 7.7E-15 |

|          |       |       |       |         |       |       |         |
|----------|-------|-------|-------|---------|-------|-------|---------|
| Pcdhga12 | 709   | -1.58 | -0.66 | 2.0E-03 | -1.62 | -0.70 | 1.0E-03 |
| Pcdhga2  | 580   | -1.38 | -0.47 | 5.3E-03 | -1.35 | -0.44 | 1.0E-02 |
| Pcdhga3  | 664   | -1.38 | -0.46 | 1.8E-03 | -1.53 | -0.61 | 2.8E-05 |
| Pcdhga4  | 302   | -1.70 | -0.77 | 4.2E-06 | -1.56 | -0.64 | 1.4E-04 |
| Pcdhga5  | 473   | -1.31 | -0.39 | 4.4E-04 | -1.37 | -0.45 | 4.0E-05 |
| Pcdhga6  | 405   | -1.86 | -0.90 | 1.2E-08 | -1.85 | -0.89 | 1.9E-08 |
| Pcdhga7  | 584   | -1.60 | -0.68 | 3.0E-08 | -1.73 | -0.79 | 8.2E-11 |
| Pcdhga8  | 335   | -1.46 | -0.54 | 9.1E-04 | -1.32 | -0.41 | 1.5E-02 |
| Pcdhga9  | 322   | -1.58 | -0.66 | 2.1E-06 | -1.75 | -0.80 | 5.3E-09 |
| Pcdhgb1  | 291   | -1.71 | -0.78 | 8.0E-05 | -1.67 | -0.74 | 2.0E-04 |
| Pcdhgb2  | 424   | -1.61 | -0.69 | 6.2E-08 | -1.61 | -0.68 | 7.8E-08 |
| Pcdhgb4  | 351   | -1.55 | -0.63 | 2.1E-07 | -1.52 | -0.60 | 9.3E-07 |
| Pcdhgb5  | 462   | -1.62 | -0.69 | 2.2E-07 | -1.71 | -0.78 | 5.9E-09 |
| Pcdhgb6  | 1079  | -1.61 | -0.68 | 4.9E-06 | -1.64 | -0.71 | 2.1E-06 |
| Pcdhgb7  | 570   | -1.73 | -0.79 | 1.7E-11 | -1.69 | -0.76 | 1.5E-10 |
| Pcdhgc3  | 6382  | 1.33  | 0.41  | 6.0E-03 | 1.30  | 0.38  | 1.1E-02 |
| Pced1a   | 1376  | -2.20 | -1.14 | 1.6E-91 | -2.24 | -1.16 | 3.9E-96 |
| Pced1b   | 191   | -1.63 | -0.70 | 2.7E-04 | -1.76 | -0.81 | 2.0E-05 |
| Pcgf1    | 786   | -1.35 | -0.43 | 7.1E-14 | -1.33 | -0.41 | 1.2E-12 |
| Pcgf2    | 5286  | -1.69 | -0.76 | 5.8E-07 | -1.81 | -0.86 | 1.5E-08 |
| Pcgf3    | 10060 | -1.24 | -0.31 | 3.4E-06 | -1.28 | -0.36 | 6.0E-08 |
| Pcgf5    | 1863  | 1.36  | 0.44  | 4.0E-03 | 1.44  | 0.53  | 5.1E-04 |
| Pcid2    | 2970  | -1.19 | -0.25 | 4.4E-03 | -1.28 | -0.36 | 2.9E-05 |
| Pcif1    | 4387  | -1.45 | -0.54 | 1.7E-07 | -1.58 | -0.66 | 9.3E-11 |
| Pck2     | 1166  | -1.50 | -0.58 | 3.2E-07 | -1.60 | -0.67 | 2.5E-09 |
| Pcnt     | 3373  | -2.29 | -1.19 | 1.0E-23 | -2.22 | -1.15 | 4.7E-22 |
| Pcnx4    | 3878  | 2.25  | 1.17  | 2.6E-65 | 2.40  | 1.26  | 2.7E-75 |
| Pcolce2  | 140   | -4.38 | -2.13 | 1.8E-19 | -3.59 | -1.85 | 6.6E-15 |
| Pcp4l1   | 1133  | 2.40  | 1.27  | 3.6E-10 | 2.43  | 1.28  | 2.3E-10 |
| Pcsk1    | 305   | 1.47  | 0.56  | 1.3E-02 | 1.62  | 0.70  | 1.9E-03 |
| Pcsk2    | 2274  | 1.36  | 0.45  | 3.5E-02 | 1.40  | 0.49  | 2.2E-02 |
| Pcsk4    | 207   | 2.36  | 1.24  | 1.3E-10 | 2.21  | 1.14  | 3.7E-09 |
| Pcsk6    | 655   | -1.79 | -0.84 | 6.4E-07 | -1.61 | -0.69 | 5.4E-05 |
| Pctp     | 515   | 1.88  | 0.91  | 5.1E-04 | 1.57  | 0.65  | 1.6E-02 |
| Pcx      | 2714  | 1.60  | 0.68  | 6.8E-10 | 1.52  | 0.60  | 5.7E-08 |
| Pcyox1   | 10636 | 1.30  | 0.37  | 5.3E-11 | 1.23  | 0.30  | 1.4E-07 |
| Pcyt1a   | 7273  | 1.30  | 0.38  | 9.1E-09 | 1.30  | 0.37  | 1.3E-08 |
| Pcyt1b   | 3430  | -2.10 | -1.07 | 1.2E-16 | -2.03 | -1.02 | 2.8E-15 |
| Pcyt2    | 4545  | 1.54  | 0.62  | 6.2E-12 | 1.42  | 0.51  | 2.8E-08 |
| Pdcd10   | 3779  | 1.22  | 0.28  | 2.8E-03 | 1.33  | 0.41  | 9.8E-06 |
| Pdcl3    | 4311  | 1.30  | 0.37  | 4.0E-07 | 1.26  | 0.34  | 5.5E-06 |
| Pde10a   | 2543  | -1.55 | -0.63 | 4.6E-03 | -1.52 | -0.61 | 6.8E-03 |
| Pde3a    | 1410  | -1.64 | -0.71 | 2.0E-04 | -1.64 | -0.71 | 2.3E-04 |
| Pde4a    | 1571  | 1.58  | 0.66  | 1.0E-03 | 1.45  | 0.53  | 9.6E-03 |
| Pde5a    | 2634  | -1.31 | -0.39 | 2.3E-05 | -1.24 | -0.31 | 8.0E-04 |
| Pde6d    | 2492  | 1.31  | 0.39  | 3.9E-08 | 1.23  | 0.30  | 3.9E-05 |
| Pde7b    | 561   | -2.00 | -1.00 | 9.6E-07 | -1.99 | -1.00 | 1.1E-06 |

|          |       |       |       |         |       |       |         |
|----------|-------|-------|-------|---------|-------|-------|---------|
| Pde8b    | 219   | -1.66 | -0.73 | 1.4E-03 | -1.72 | -0.78 | 5.8E-04 |
| Pde9a    | 2649  | 1.65  | 0.73  | 1.3E-25 | 1.51  | 0.60  | 1.4E-17 |
| Pdgfb    | 601   | -1.22 | -0.29 | 2.3E-02 | -1.41 | -0.50 | 5.6E-05 |
| Pdgfc    | 1326  | -2.05 | -1.03 | 6.5E-06 | -1.92 | -0.94 | 5.0E-05 |
| Pdgfd    | 180   | -1.69 | -0.75 | 3.4E-03 | -1.87 | -0.90 | 4.4E-04 |
| Pdgfra   | 6469  | -2.49 | -1.31 | 1.5E-04 | -2.10 | -1.07 | 2.5E-03 |
| Pdha1    | 12367 | 1.32  | 0.40  | 9.8E-07 | 1.26  | 0.34  | 4.9E-05 |
| Pdhx     | 3130  | 1.25  | 0.33  | 3.0E-08 | 1.30  | 0.38  | 1.4E-10 |
| Pdia5    | 1044  | 1.31  | 0.39  | 5.6E-03 | 1.35  | 0.43  | 2.6E-03 |
| Pdk1     | 4064  | 1.24  | 0.31  | 1.1E-02 | 1.33  | 0.41  | 6.5E-04 |
| Pdk2     | 1859  | 2.00  | 1.00  | 1.8E-19 | 2.02  | 1.02  | 3.9E-20 |
| Pdk4     | 205   | 2.25  | 1.17  | 8.3E-12 | 2.53  | 1.34  | 7.2E-15 |
| Pdlim4   | 1133  | 1.66  | 0.73  | 3.5E-05 | 1.70  | 0.77  | 1.5E-05 |
| Pdlim5   | 4085  | 2.20  | 1.14  | 1.0E-29 | 2.15  | 1.11  | 3.0E-28 |
| Pdlim7   | 3519  | 1.46  | 0.55  | 8.5E-07 | 1.34  | 0.42  | 1.9E-04 |
| Pdp1     | 4889  | 1.33  | 0.41  | 2.7E-04 | 1.38  | 0.47  | 3.1E-05 |
| Pdp2     | 2326  | 1.30  | 0.37  | 2.1E-07 | 1.30  | 0.37  | 2.4E-07 |
| Pdpk1    | 9306  | 1.37  | 0.45  | 1.0E-06 | 1.39  | 0.47  | 3.2E-07 |
| Pdrg1    | 4504  | 1.38  | 0.47  | 6.8E-20 | 1.40  | 0.48  | 2.9E-21 |
| Pds5b    | 13938 | -1.37 | -0.45 | 2.7E-06 | -1.22 | -0.29 | 4.1E-03 |
| Pdss1    | 1545  | 1.23  | 0.30  | 4.4E-03 | 1.29  | 0.37  | 3.6E-04 |
| Pdss2    | 593   | -1.38 | -0.46 | 6.2E-09 | -1.44 | -0.53 | 2.4E-11 |
| Pdxk     | 2900  | 2.25  | 1.17  | 9.8E-35 | 2.03  | 1.02  | 8.0E-27 |
| Pdzd2    | 1144  | -1.89 | -0.92 | 1.7E-06 | -1.79 | -0.84 | 1.6E-05 |
| Pdzd7    | 386   | 2.14  | 1.10  | 6.2E-06 | 1.92  | 0.94  | 1.2E-04 |
| Pdzd8    | 8176  | 1.44  | 0.53  | 5.7E-22 | 1.50  | 0.58  | 1.2E-26 |
| Pdzk1ip1 | 173   | -1.77 | -0.83 | 6.6E-03 | -1.66 | -0.73 | 1.8E-02 |
| Pdzph1   | 221   | -1.94 | -0.95 | 2.0E-03 | -2.24 | -1.16 | 1.4E-04 |
| Pea15a   | 27187 | 1.25  | 0.32  | 1.5E-04 | 1.22  | 0.29  | 8.5E-04 |
| Peak1    | 2739  | 1.64  | 0.71  | 1.6E-04 | 2.02  | 1.01  | 3.8E-08 |
| Pear1    | 972   | -1.40 | -0.48 | 4.6E-02 | -1.52 | -0.61 | 1.1E-02 |
| Pecam1   | 2748  | -1.22 | -0.28 | 1.0E-02 | -1.26 | -0.33 | 2.4E-03 |
| Pecr     | 490   | 1.35  | 0.43  | 2.6E-04 | 1.39  | 0.48  | 4.2E-05 |
| Pef1     | 1858  | -1.67 | -0.74 | 1.2E-18 | -1.75 | -0.81 | 4.0E-22 |
| Peg12    | 1943  | -1.69 | -0.76 | 1.1E-03 | -2.01 | -1.00 | 1.2E-05 |
| Peli2    | 2869  | 1.31  | 0.39  | 1.1E-03 | 1.28  | 0.36  | 3.3E-03 |
| Peli3    | 973   | 2.09  | 1.07  | 4.4E-14 | 2.01  | 1.01  | 1.3E-12 |
| Penk     | 1392  | -2.51 | -1.33 | 5.1E-03 | -1.98 | -0.98 | 4.4E-02 |
| Pepd     | 1988  | 1.60  | 0.68  | 2.8E-10 | 1.56  | 0.64  | 2.2E-09 |
| Per1     | 3226  | 1.95  | 0.97  | 1.1E-11 | 1.77  | 0.83  | 8.2E-09 |
| Per2     | 1092  | 1.71  | 0.77  | 1.0E-05 | 1.68  | 0.75  | 2.2E-05 |
| Per3     | 1173  | 1.85  | 0.89  | 8.7E-21 | 1.92  | 0.94  | 5.5E-23 |
| Perm1    | 293   | 2.66  | 1.41  | 5.1E-19 | 2.96  | 1.57  | 3.4E-23 |
| Perp     | 438   | -3.34 | -1.74 | 3.0E-03 | -2.66 | -1.41 | 1.9E-02 |
| Pex1     | 2115  | -1.26 | -0.33 | 1.5E-05 | -1.18 | -0.24 | 1.8E-03 |
| Pex11a   | 846   | 1.90  | 0.93  | 2.3E-33 | 1.80  | 0.85  | 3.0E-28 |
| Pex11g   | 212   | -2.01 | -1.01 | 9.0E-22 | -2.07 | -1.05 | 4.2E-23 |

|         |       |       |       |         |       |       |         |
|---------|-------|-------|-------|---------|-------|-------|---------|
| Pex12   | 481   | -1.39 | -0.47 | 1.6E-09 | -1.47 | -0.56 | 1.0E-12 |
| Pex13   | 4933  | 1.62  | 0.70  | 6.8E-20 | 1.67  | 0.74  | 5.9E-22 |
| Pex16   | 961   | 1.31  | 0.39  | 6.5E-06 | 1.23  | 0.30  | 5.3E-04 |
| Pex26   | 2397  | 1.85  | 0.89  | 1.9E-19 | 1.75  | 0.80  | 3.7E-16 |
| Pex5    | 6802  | 1.58  | 0.66  | 2.9E-12 | 1.46  | 0.55  | 7.0E-09 |
| Pex6    | 3890  | 1.39  | 0.48  | 4.6E-05 | 1.35  | 0.43  | 2.8E-04 |
| Pex7    | 836   | -2.40 | -1.27 | 3.4E-59 | -2.40 | -1.26 | 1.2E-58 |
| Pfdn1   | 3377  | -1.57 | -0.65 | 9.0E-08 | -1.59 | -0.67 | 4.1E-08 |
| Pfdn6   | 5364  | 1.51  | 0.59  | 4.3E-04 | 1.32  | 0.40  | 1.9E-02 |
| Pfkfb1  | 239   | -1.57 | -0.66 | 4.1E-07 | -1.68 | -0.75 | 8.9E-09 |
| Pfkfb2  | 2491  | 1.36  | 0.44  | 1.3E-05 | 1.45  | 0.53  | 1.2E-07 |
| Pfkfb3  | 3112  | -2.18 | -1.12 | 8.3E-18 | -2.10 | -1.07 | 2.2E-16 |
| Pfkp    | 14468 | 1.88  | 0.91  | 3.6E-03 | 2.55  | 1.35  | 9.2E-06 |
| Pfn1    | 10690 | -1.27 | -0.34 | 8.9E-03 | -1.41 | -0.49 | 1.1E-04 |
| Pfn4    | 210   | -3.99 | -2.00 | 6.6E-25 | -3.65 | -1.87 | 5.1E-22 |
| Pgam1   | 12146 | 1.35  | 0.43  | 7.1E-06 | 1.23  | 0.30  | 2.4E-03 |
| Pgap1   | 15824 | 1.57  | 0.65  | 1.9E-04 | 1.85  | 0.88  | 2.8E-07 |
| Pgap3   | 354   | -4.11 | -2.04 | 9.6E-76 | -4.51 | -2.17 | 2.2E-85 |
| Pgbd1   | 590   | -1.47 | -0.56 | 1.3E-05 | -1.64 | -0.71 | 1.8E-08 |
| Pgbd5   | 1690  | 2.38  | 1.25  | 4.9E-21 | 2.25  | 1.17  | 1.4E-18 |
| Pgd     | 9982  | 1.36  | 0.44  | 7.4E-06 | 1.23  | 0.30  | 3.5E-03 |
| Pgf     | 348   | -1.27 | -0.35 | 1.5E-02 | -1.23 | -0.30 | 3.8E-02 |
| Pgghg   | 1129  | -1.67 | -0.74 | 1.9E-06 | -1.75 | -0.81 | 1.7E-07 |
| Pgk1    | 25746 | 1.32  | 0.40  | 5.4E-04 | 1.25  | 0.32  | 7.0E-03 |
| Pgm2    | 3130  | 1.84  | 0.88  | 9.7E-59 | 1.84  | 0.88  | 5.0E-59 |
| Pgm3    | 2790  | 1.56  | 0.64  | 9.2E-14 | 1.61  | 0.69  | 1.2E-15 |
| Pgp     | 2958  | 1.94  | 0.96  | 9.9E-33 | 1.76  | 0.82  | 5.2E-24 |
| Pgpep1  | 5687  | 1.57  | 0.65  | 1.6E-08 | 1.51  | 0.60  | 2.3E-07 |
| Pgr     | 169   | 1.60  | 0.68  | 8.3E-03 | 1.68  | 0.75  | 3.6E-03 |
| Pgrmc2  | 5271  | 1.68  | 0.75  | 1.2E-16 | 1.51  | 0.59  | 6.8E-11 |
| Phactr2 | 3670  | -1.60 | -0.68 | 6.7E-07 | -1.48 | -0.57 | 4.2E-05 |
| Phactr3 | 2006  | -1.60 | -0.68 | 8.6E-03 | -1.64 | -0.71 | 6.1E-03 |
| Phactr4 | 4597  | -1.30 | -0.38 | 1.1E-02 | -1.40 | -0.49 | 8.0E-04 |
| Phaf1   | 2851  | 1.57  | 0.65  | 2.8E-36 | 1.52  | 0.61  | 1.9E-31 |
| Phb     | 6881  | 1.29  | 0.37  | 2.3E-05 | 1.27  | 0.34  | 1.1E-04 |
| Pheta1  | 3116  | 1.51  | 0.60  | 2.3E-10 | 1.39  | 0.47  | 6.6E-07 |
| Pheta2  | 202   | -3.57 | -1.83 | 3.3E-20 | -3.54 | -1.83 | 9.5E-20 |
| Phf11c  | 445   | 2.71  | 1.44  | 6.2E-50 | 2.84  | 1.50  | 8.2E-54 |
| Phf13   | 3205  | 1.64  | 0.71  | 1.2E-16 | 1.54  | 0.62  | 5.5E-13 |
| Phf14   | 11218 | -1.74 | -0.80 | 2.7E-18 | -1.77 | -0.82 | 2.0E-19 |
| Phf19   | 335   | -1.54 | -0.62 | 6.7E-06 | -1.78 | -0.83 | 1.3E-09 |
| Phf2    | 6735  | -1.85 | -0.88 | 5.0E-08 | -2.00 | -1.00 | 5.6E-10 |
| Phf20   | 8339  | 1.24  | 0.31  | 1.2E-06 | 1.29  | 0.36  | 5.4E-09 |
| Phka2   | 2953  | 1.20  | 0.27  | 1.4E-02 | 1.26  | 0.33  | 2.0E-03 |
| Phkb    | 3910  | -1.34 | -0.42 | 3.3E-05 | -1.21 | -0.28 | 7.5E-03 |
| Phkg2   | 3609  | 1.26  | 0.34  | 4.5E-08 | 1.19  | 0.25  | 4.8E-05 |
| Phldb2  | 6885  | -1.49 | -0.58 | 6.4E-03 | -1.41 | -0.49 | 2.3E-02 |



|          |       |       |       |         |       |       |         |
|----------|-------|-------|-------|---------|-------|-------|---------|
| Phldb3   | 132   | 4.83  | 2.27  | 8.7E-07 | 4.89  | 2.29  | 7.8E-07 |
| Phospho2 | 2340  | 1.27  | 0.34  | 7.0E-05 | 1.35  | 0.44  | 2.4E-07 |
| Phtf1    | 4560  | -1.55 | -0.64 | 3.4E-19 | -1.56 | -0.64 | 2.2E-19 |
| Phtf2    | 3888  | 1.49  | 0.57  | 4.5E-16 | 1.53  | 0.62  | 3.0E-18 |
| Phyh     | 1347  | -1.43 | -0.51 | 8.6E-20 | -1.39 | -0.47 | 8.3E-17 |
| Phyhip   | 193   | 1.86  | 0.90  | 3.8E-07 | 1.70  | 0.77  | 1.8E-05 |
| Pi16     | 115   | -1.91 | -0.93 | 4.3E-10 | -2.48 | -1.31 | 8.6E-19 |
| Pi4k2a   | 5780  | 2.15  | 1.10  | 2.4E-66 | 2.08  | 1.06  | 4.4E-61 |
| Pi4k2b   | 2638  | 2.20  | 1.14  | 8.8E-18 | 2.18  | 1.12  | 2.0E-17 |
| Pias3    | 2259  | -1.48 | -0.57 | 1.7E-10 | -1.56 | -0.64 | 3.8E-13 |
| Pick1    | 1257  | -1.32 | -0.40 | 2.5E-03 | -1.38 | -0.46 | 4.7E-04 |
| Pid1     | 3366  | -1.56 | -0.64 | 8.0E-05 | -1.36 | -0.44 | 8.1E-03 |
| Piezo2   | 1515  | -2.22 | -1.15 | 1.5E-03 | -1.99 | -0.99 | 7.2E-03 |
| Piga     | 2529  | 1.66  | 0.74  | 3.0E-10 | 1.62  | 0.70  | 3.0E-09 |
| Pigb     | 1251  | -1.38 | -0.46 | 1.0E-13 | -1.34 | -0.42 | 1.3E-11 |
| Pigc     | 1658  | -1.70 | -0.77 | 7.5E-54 | -1.64 | -0.71 | 2.7E-46 |
| Pigf     | 1493  | 2.44  | 1.29  | 3.4E-32 | 2.43  | 1.28  | 1.0E-31 |
| Pigh     | 1044  | -1.39 | -0.47 | 5.5E-07 | -1.38 | -0.46 | 8.7E-07 |
| Pigk     | 2989  | -1.40 | -0.49 | 9.3E-06 | -1.40 | -0.48 | 1.2E-05 |
| Pigm     | 4879  | 1.59  | 0.67  | 6.9E-08 | 1.45  | 0.53  | 2.3E-05 |
| Pign     | 4913  | 1.50  | 0.58  | 1.6E-07 | 1.71  | 0.77  | 1.6E-12 |
| Pigo     | 2063  | -1.51 | -0.60 | 1.5E-13 | -1.65 | -0.72 | 2.7E-19 |
| Pigp     | 2067  | -1.62 | -0.69 | 3.5E-20 | -1.60 | -0.68 | 1.9E-19 |
| Pigq     | 4021  | -1.44 | -0.53 | 4.1E-23 | -1.52 | -0.61 | 1.0E-29 |
| Pigs     | 4860  | 1.86  | 0.90  | 1.4E-24 | 1.75  | 0.81  | 4.3E-20 |
| Pigu     | 2333  | -1.36 | -0.44 | 2.6E-12 | -1.38 | -0.47 | 1.0E-13 |
| Pigv     | 1408  | 1.38  | 0.46  | 4.5E-07 | 1.37  | 0.46  | 6.2E-07 |
| Pigw     | 537   | -2.08 | -1.05 | 1.4E-28 | -2.16 | -1.11 | 1.0E-31 |
| Pigyl    | 880   | 1.31  | 0.39  | 2.5E-04 | 1.40  | 0.49  | 3.5E-06 |
| Pih1d1   | 2553  | -1.72 | -0.78 | 1.2E-32 | -1.82 | -0.86 | 3.8E-39 |
| Pih1d2   | 225   | -1.42 | -0.50 | 7.2E-04 | -1.37 | -0.46 | 2.6E-03 |
| Pik3c2a  | 7213  | 1.25  | 0.32  | 3.7E-02 | 1.49  | 0.57  | 1.2E-04 |
| Pik3c2b  | 4083  | -1.65 | -0.72 | 7.3E-06 | -1.81 | -0.86 | 9.1E-08 |
| Pik3cb   | 2150  | 1.73  | 0.79  | 3.6E-22 | 1.77  | 0.82  | 1.2E-23 |
| Pik3cg   | 194   | -2.20 | -1.14 | 4.0E-09 | -2.41 | -1.27 | 6.5E-11 |
| Pik3ip1  | 790   | -1.41 | -0.50 | 5.9E-06 | -1.39 | -0.48 | 1.6E-05 |
| Pik3r3   | 11699 | -1.40 | -0.49 | 7.0E-05 | -1.43 | -0.52 | 2.4E-05 |
| Pik3r4   | 3800  | 1.26  | 0.34  | 3.3E-05 | 1.24  | 0.31  | 1.7E-04 |
| Pik3r5   | 200   | 2.58  | 1.36  | 3.6E-06 | 2.72  | 1.44  | 1.0E-06 |
| Pik3r6   | 177   | 1.29  | 0.36  | 7.9E-04 | 1.24  | 0.32  | 3.7E-03 |
| Pikfyve  | 9674  | 2.16  | 1.11  | 2.3E-18 | 2.44  | 1.29  | 3.7E-24 |
| Pim1     | 2603  | 1.54  | 0.62  | 2.4E-04 | 1.36  | 0.45  | 1.0E-02 |
| Pim2     | 1367  | 2.05  | 1.04  | 7.2E-24 | 1.79  | 0.84  | 6.6E-16 |
| Pin1     | 3848  | 1.63  | 0.71  | 4.5E-19 | 1.54  | 0.62  | 5.9E-15 |
| Pip4k2a  | 2860  | 1.92  | 0.94  | 1.1E-39 | 1.94  | 0.96  | 5.0E-41 |
| Pip4k2b  | 14253 | 1.51  | 0.59  | 3.0E-08 | 1.46  | 0.54  | 4.2E-07 |
| Pip4k2c  | 2598  | 1.39  | 0.48  | 1.4E-09 | 1.39  | 0.48  | 1.4E-09 |

|         |       |       |       |         |       |       |         |
|---------|-------|-------|-------|---------|-------|-------|---------|
| Pip4p1  | 4135  | 1.73  | 0.79  | 2.8E-39 | 1.61  | 0.69  | 1.8E-30 |
| Pip4p2  | 4716  | -1.55 | -0.63 | 1.1E-12 | -1.64 | -0.71 | 6.1E-16 |
| Pip5k1b | 282   | 1.38  | 0.46  | 1.1E-03 | 1.23  | 0.29  | 4.6E-02 |
| Pip5kl1 | 244   | 2.37  | 1.24  | 3.4E-21 | 2.22  | 1.15  | 2.3E-18 |
| Pipox   | 593   | -2.01 | -1.00 | 5.0E-08 | -2.35 | -1.23 | 1.4E-11 |
| Pithd1  | 1798  | 1.41  | 0.50  | 2.6E-12 | 1.22  | 0.29  | 6.4E-05 |
| Pitpna  | 11361 | 1.47  | 0.56  | 5.8E-28 | 1.38  | 0.47  | 6.4E-20 |
| Pitpnb  | 9524  | 1.32  | 0.40  | 2.6E-08 | 1.18  | 0.24  | 1.0E-03 |
| Pitpnc1 | 6213  | -1.35 | -0.43 | 1.2E-05 | -1.37 | -0.45 | 4.9E-06 |
| Pitpnm2 | 3374  | -1.80 | -0.85 | 2.7E-08 | -1.82 | -0.87 | 1.5E-08 |
| Pitpnm3 | 349   | -1.89 | -0.92 | 9.2E-03 | -1.69 | -0.75 | 3.6E-02 |
| Pitx1   | 157   | -3.67 | -1.88 | 5.1E-03 | -5.34 | -2.42 | 2.6E-04 |
| Pja2    | 22678 | 1.22  | 0.28  | 2.0E-02 | 1.35  | 0.43  | 2.8E-04 |
| Pkd2    | 5420  | -2.73 | -1.45 | 3.3E-43 | -2.56 | -1.36 | 5.7E-38 |
| Pknox2  | 3828  | 1.26  | 0.34  | 1.6E-06 | 1.13  | 0.18  | 1.7E-02 |
| Pkp1    | 127   | -6.56 | -2.71 | 6.8E-03 | -6.69 | -2.74 | 6.6E-03 |
| Pkp2    | 686   | 5.35  | 2.42  | 1.6E-21 | 4.56  | 2.19  | 9.0E-18 |
| Pkp4    | 8350  | 1.75  | 0.81  | 9.1E-41 | 1.72  | 0.78  | 2.5E-38 |
| Pla2g4c | 631   | 1.50  | 0.59  | 1.6E-05 | 1.54  | 0.62  | 6.0E-06 |
| Plag1   | 2036  | 1.54  | 0.62  | 6.8E-06 | 1.86  | 0.90  | 5.8E-11 |
| Plat    | 4185  | 1.56  | 0.64  | 2.9E-12 | 1.47  | 0.56  | 1.7E-09 |
| Plbd2   | 2702  | 1.64  | 0.71  | 1.2E-11 | 1.55  | 0.64  | 1.7E-09 |
| Plcb3   | 4809  | 2.01  | 1.01  | 8.8E-11 | 2.01  | 1.01  | 9.5E-11 |
| Plcb4   | 2810  | -1.46 | -0.55 | 3.6E-05 | -1.34 | -0.43 | 1.6E-03 |
| Plcd1   | 1522  | 1.32  | 0.41  | 1.7E-02 | 1.30  | 0.38  | 2.9E-02 |
| Plcd3   | 496   | 3.47  | 1.79  | 2.2E-17 | 3.64  | 1.86  | 1.5E-18 |
| Plce1   | 2831  | -1.54 | -0.62 | 8.1E-09 | -1.31 | -0.39 | 4.3E-04 |
| Plcg2   | 339   | 1.95  | 0.97  | 1.2E-07 | 1.74  | 0.80  | 1.6E-05 |
| Plch1   | 4955  | 1.53  | 0.61  | 7.1E-05 | 1.63  | 0.71  | 4.5E-06 |
| Plcl2   | 2119  | -1.75 | -0.81 | 8.2E-13 | -1.80 | -0.85 | 6.2E-14 |
| Plcx2   | 3734  | 1.95  | 0.96  | 1.3E-10 | 2.26  | 1.18  | 2.9E-15 |
| Pld3    | 4215  | 1.49  | 0.58  | 1.6E-08 | 1.50  | 0.59  | 8.4E-09 |
| Pld5    | 145   | -3.74 | -1.90 | 9.8E-11 | -3.32 | -1.73 | 4.9E-09 |
| Plec    | 7010  | 1.45  | 0.53  | 1.3E-03 | 1.49  | 0.58  | 4.4E-04 |
| Plek    | 727   | -1.74 | -0.80 | 4.3E-05 | -1.68 | -0.75 | 1.3E-04 |
| Plekha3 | 2122  | 1.34  | 0.42  | 2.6E-13 | 1.28  | 0.35  | 1.4E-09 |
| Plekha4 | 180   | -2.70 | -1.43 | 3.1E-04 | -2.49 | -1.32 | 1.0E-03 |
| Plekha5 | 5411  | -1.93 | -0.95 | 1.5E-33 | -1.95 | -0.96 | 1.5E-34 |
| Plekha6 | 8305  | -1.51 | -0.59 | 5.5E-04 | -1.57 | -0.65 | 1.5E-04 |
| Plekha7 | 3088  | 2.13  | 1.09  | 5.6E-16 | 1.97  | 0.98  | 3.6E-13 |
| Plekha8 | 5867  | 1.38  | 0.46  | 3.2E-12 | 1.37  | 0.45  | 1.2E-11 |
| Plekha2 | 3773  | 1.69  | 0.75  | 1.9E-40 | 1.64  | 0.72  | 1.0E-36 |
| Plekha1 | 330   | 4.68  | 2.23  | 4.1E-40 | 4.80  | 2.26  | 7.0E-41 |
| Plekha3 | 2486  | -2.09 | -1.06 | 1.0E-17 | -2.12 | -1.08 | 2.3E-18 |
| Plekha2 | 6442  | -1.26 | -0.34 | 1.8E-02 | -1.34 | -0.42 | 3.2E-03 |
| Plekha4 | 1159  | 3.99  | 2.00  | 9.4E-32 | 4.23  | 2.08  | 2.5E-34 |
| Plekha2 | 1655  | 1.52  | 0.61  | 8.4E-04 | 1.76  | 0.81  | 5.2E-06 |

|         |       |       |       |         |       |       |         |
|---------|-------|-------|-------|---------|-------|-------|---------|
| Plekhh3 | 1070  | 2.69  | 1.43  | 4.8E-35 | 2.49  | 1.32  | 6.5E-30 |
| Plekhm1 | 2965  | 1.68  | 0.75  | 4.1E-12 | 1.57  | 0.65  | 2.4E-09 |
| Plekhm2 | 2297  | -1.46 | -0.54 | 1.3E-06 | -1.57 | -0.65 | 5.4E-09 |
| Plekho1 | 3810  | -1.79 | -0.84 | 8.9E-15 | -1.92 | -0.94 | 3.0E-18 |
| Plekho2 | 1761  | 2.46  | 1.30  | 6.5E-17 | 2.38  | 1.25  | 9.3E-16 |
| Plin2   | 2216  | -1.98 | -0.99 | 2.2E-12 | -2.00 | -1.00 | 1.1E-12 |
| Plk1    | 3447  | -1.54 | -0.62 | 5.4E-03 | -1.83 | -0.87 | 7.0E-05 |
| Plk2    | 7132  | -1.47 | -0.56 | 5.9E-07 | -1.48 | -0.57 | 3.5E-07 |
| Plod3   | 3582  | -1.33 | -0.41 | 2.0E-05 | -1.42 | -0.51 | 9.5E-08 |
| Plp1    | 1332  | -1.65 | -0.72 | 4.4E-10 | -1.54 | -0.62 | 9.2E-08 |
| Plp2    | 1038  | -1.99 | -0.99 | 7.4E-13 | -2.04 | -1.03 | 1.0E-13 |
| Plpbp   | 3893  | 1.27  | 0.34  | 1.2E-07 | 1.33  | 0.42  | 9.8E-11 |
| Plpp3   | 6037  | -1.85 | -0.89 | 3.7E-30 | -1.85 | -0.89 | 5.4E-30 |
| Plpp5   | 1196  | -2.43 | -1.28 | 4.3E-46 | -2.38 | -1.25 | 5.6E-44 |
| Plpp7   | 262   | -1.87 | -0.90 | 2.2E-07 | -1.73 | -0.79 | 7.2E-06 |
| Plppr2  | 4711  | 1.41  | 0.50  | 9.0E-03 | 1.39  | 0.47  | 1.5E-02 |
| Plppr3  | 14124 | -1.44 | -0.52 | 7.1E-06 | -1.48 | -0.57 | 9.5E-07 |
| Plrg1   | 5822  | 1.27  | 0.34  | 4.5E-04 | 1.24  | 0.31  | 1.4E-03 |
| Pls1    | 725   | 2.38  | 1.25  | 1.1E-12 | 2.43  | 1.28  | 3.7E-13 |
| Pls3    | 7182  | 1.43  | 0.52  | 8.4E-05 | 1.47  | 0.55  | 2.2E-05 |
| Plscr3  | 2888  | -1.25 | -0.32 | 5.6E-03 | -1.32 | -0.40 | 5.2E-04 |
| Plscr4  | 146   | -2.18 | -1.12 | 6.2E-07 | -2.14 | -1.10 | 1.4E-06 |
| Plxna3  | 18041 | 1.31  | 0.39  | 1.0E-02 | 1.39  | 0.47  | 1.9E-03 |
| Plxnb1  | 17385 | -1.79 | -0.84 | 1.2E-08 | -1.91 | -0.93 | 2.6E-10 |
| Pm20d2  | 108   | -1.68 | -0.75 | 1.5E-03 | -2.26 | -1.18 | 5.4E-07 |
| Pmaip1  | 652   | 3.61  | 1.85  | 2.5E-10 | 3.13  | 1.65  | 2.2E-08 |
| Pmf1    | 1767  | -1.54 | -0.63 | 2.9E-04 | -1.90 | -0.92 | 5.0E-08 |
| Pmm1    | 1980  | 1.83  | 0.87  | 1.9E-26 | 1.78  | 0.83  | 4.4E-24 |
| Pmm2    | 2334  | -2.06 | -1.04 | 1.8E-59 | -2.10 | -1.07 | 6.3E-62 |
| Pmp22   | 1376  | -2.34 | -1.23 | 9.3E-06 | -2.21 | -1.14 | 4.2E-05 |
| Pmpcb   | 4600  | -1.25 | -0.32 | 2.1E-04 | -1.27 | -0.34 | 5.9E-05 |
| Pms2    | 2321  | 1.32  | 0.40  | 3.1E-07 | 1.30  | 0.38  | 1.6E-06 |
| Pmvk    | 2886  | 1.34  | 0.42  | 1.1E-06 | 1.28  | 0.36  | 5.1E-05 |
| Pnlsr   | 26071 | -1.95 | -0.96 | 1.5E-24 | -1.81 | -0.86 | 1.0E-19 |
| Pnkd    | 3936  | 1.58  | 0.66  | 7.6E-13 | 1.52  | 0.61  | 6.3E-11 |
| Pnkp    | 1824  | 1.32  | 0.40  | 5.0E-07 | 1.21  | 0.28  | 8.1E-04 |
| Pnlc1   | 246   | -1.36 | -0.44 | 4.5E-04 | -1.33 | -0.41 | 1.2E-03 |
| pnma1   | 143   | -1.48 | -0.57 | 1.3E-05 | -1.66 | -0.73 | 1.5E-08 |
| Pnma2   | 3038  | 2.48  | 1.31  | 2.4E-23 | 2.61  | 1.39  | 5.1E-26 |
| Pnma3   | 667   | -1.39 | -0.47 | 1.5E-02 | -1.52 | -0.61 | 1.4E-03 |
| Pnn     | 20926 | -1.23 | -0.30 | 1.2E-02 | -1.31 | -0.38 | 1.0E-03 |
| Pno1    | 2529  | 1.48  | 0.57  | 5.4E-05 | 1.37  | 0.45  | 1.6E-03 |
| Pnoc    | 559   | -3.08 | -1.62 | 2.0E-09 | -3.04 | -1.60 | 3.1E-09 |
| Pnpla2  | 1152  | 2.44  | 1.29  | 4.1E-28 | 2.33  | 1.22  | 2.1E-25 |
| Pnpla3  | 284   | 3.75  | 1.91  | 3.1E-58 | 3.37  | 1.75  | 7.2E-50 |
| Pnpla6  | 3170  | -1.28 | -0.35 | 1.2E-04 | -1.27 | -0.34 | 1.9E-04 |
| Pnpla7  | 498   | -1.27 | -0.34 | 2.0E-03 | -1.28 | -0.35 | 1.4E-03 |

|         |       |       |       |         |       |       |         |
|---------|-------|-------|-------|---------|-------|-------|---------|
| Pnp0    | 1163  | 1.61  | 0.68  | 9.1E-09 | 1.58  | 0.66  | 3.5E-08 |
| Pnrc1   | 3055  | -1.28 | -0.36 | 2.7E-06 | -1.34 | -0.42 | 1.6E-08 |
| Pnrc2   | 7960  | -1.28 | -0.36 | 1.7E-03 | -1.32 | -0.40 | 3.3E-04 |
| Poc1a   | 907   | 1.83  | 0.87  | 5.8E-06 | 1.46  | 0.54  | 6.6E-03 |
| Poc1b   | 3050  | 1.33  | 0.42  | 1.1E-04 | 1.20  | 0.26  | 2.0E-02 |
| Poc5    | 3976  | 1.37  | 0.45  | 9.8E-14 | 1.37  | 0.46  | 1.0E-13 |
| Podn    | 147   | -2.59 | -1.37 | 1.8E-05 | -2.21 | -1.14 | 4.4E-04 |
| Podxl   | 7193  | 1.35  | 0.44  | 2.0E-08 | 1.27  | 0.34  | 1.7E-05 |
| Pofut1  | 4371  | -1.52 | -0.61 | 7.4E-16 | -1.57 | -0.65 | 5.9E-18 |
| Pogk    | 15161 | -1.31 | -0.39 | 3.1E-05 | -1.27 | -0.35 | 2.4E-04 |
| Poglut2 | 2495  | 1.30  | 0.38  | 6.6E-06 | 1.33  | 0.41  | 1.2E-06 |
| Poglut3 | 777   | -3.15 | -1.66 | 3.9E-14 | -3.10 | -1.63 | 1.1E-13 |
| Pogz    | 8242  | -2.18 | -1.12 | 2.3E-29 | -2.25 | -1.17 | 8.9E-32 |
| Pola2   | 4393  | 1.67  | 0.74  | 7.1E-08 | 1.57  | 0.65  | 3.1E-06 |
| Poldip3 | 8934  | -1.23 | -0.30 | 2.0E-07 | -1.31 | -0.39 | 3.8E-12 |
| Pole3   | 6772  | 1.48  | 0.57  | 9.6E-07 | 1.37  | 0.46  | 1.1E-04 |
| Pole4   | 2215  | -1.59 | -0.67 | 5.1E-22 | -1.66 | -0.73 | 7.2E-26 |
| Polg    | 7065  | 1.91  | 0.93  | 4.5E-43 | 1.84  | 0.88  | 3.0E-38 |
| Polg2   | 704   | 1.30  | 0.38  | 8.0E-07 | 1.28  | 0.35  | 6.3E-06 |
| Polk    | 1613  | 1.80  | 0.85  | 5.9E-20 | 2.05  | 1.03  | 9.1E-29 |
| Poln    | 160   | 2.73  | 1.45  | 5.5E-13 | 2.82  | 1.49  | 1.6E-13 |
| Polr1d  | 3958  | 1.47  | 0.56  | 4.9E-11 | 1.40  | 0.49  | 1.2E-08 |
| Polr1e  | 2297  | 2.27  | 1.18  | 1.3E-43 | 2.22  | 1.15  | 3.5E-41 |
| Polr1f  | 3119  | 1.30  | 0.38  | 5.8E-04 | 1.29  | 0.36  | 1.2E-03 |
| Polr2a  | 20372 | -1.35 | -0.43 | 4.3E-04 | -1.38 | -0.47 | 1.2E-04 |
| Polr2b  | 16783 | 1.74  | 0.80  | 7.9E-13 | 1.78  | 0.84  | 5.1E-14 |
| Polr2e  | 3853  | 1.54  | 0.62  | 2.6E-06 | 1.40  | 0.49  | 3.3E-04 |
| Polr2h  | 1978  | 1.31  | 0.39  | 1.6E-05 | 1.33  | 0.42  | 3.0E-06 |
| Polr2i  | 980   | -1.25 | -0.32 | 1.6E-02 | -1.32 | -0.41 | 1.7E-03 |
| Polr2j  | 2771  | 1.32  | 0.40  | 1.5E-04 | 1.23  | 0.30  | 5.3E-03 |
| Polr2l  | 2673  | 1.59  | 0.67  | 5.6E-07 | 1.50  | 0.58  | 1.8E-05 |
| Polr2m  | 16513 | -1.51 | -0.59 | 3.0E-09 | -1.69 | -0.76 | 2.6E-14 |
| Polr3b  | 2647  | -1.64 | -0.71 | 4.9E-30 | -1.60 | -0.68 | 1.7E-27 |
| Polr3d  | 1895  | -1.33 | -0.41 | 2.7E-05 | -1.47 | -0.55 | 7.3E-09 |
| Polr3g  | 1463  | 2.19  | 1.13  | 2.2E-07 | 2.33  | 1.22  | 2.1E-08 |
| Polr3gl | 2913  | 1.77  | 0.83  | 5.7E-12 | 1.64  | 0.72  | 2.8E-09 |
| Polr3h  | 2099  | 1.72  | 0.78  | 3.5E-35 | 1.68  | 0.74  | 4.0E-32 |
| Pomgnt1 | 3228  | -1.63 | -0.70 | 1.2E-31 | -1.69 | -0.76 | 7.8E-37 |
| Pomgnt2 | 1045  | 1.55  | 0.63  | 3.9E-07 | 1.51  | 0.59  | 2.6E-06 |
| Pomk    | 1708  | -1.41 | -0.50 | 1.1E-24 | -1.45 | -0.54 | 2.0E-28 |
| Pomt1   | 2351  | -1.30 | -0.37 | 2.8E-07 | -1.29 | -0.36 | 7.1E-07 |
| Pomt2   | 2019  | -1.52 | -0.61 | 3.3E-42 | -1.51 | -0.59 | 7.2E-40 |
| Pon2    | 1369  | -1.72 | -0.79 | 2.0E-18 | -1.90 | -0.92 | 6.9E-25 |
| Pop5    | 1111  | 1.76  | 0.82  | 4.0E-17 | 1.61  | 0.69  | 2.2E-12 |
| Pop7    | 676   | -2.16 | -1.11 | 9.9E-31 | -2.24 | -1.17 | 9.1E-34 |
| Por     | 7940  | 1.90  | 0.92  | 7.1E-16 | 1.71  | 0.77  | 2.3E-11 |
| Postn   | 6560  | -3.00 | -1.59 | 5.1E-03 | -2.43 | -1.28 | 2.7E-02 |

|          |       |       |       |         |       |       |         |
|----------|-------|-------|-------|---------|-------|-------|---------|
| Pou6f1   | 6486  | -1.58 | -0.66 | 2.1E-03 | -1.62 | -0.69 | 1.4E-03 |
| Pou6f2   | 614   | -1.65 | -0.72 | 4.4E-03 | -1.48 | -0.56 | 3.0E-02 |
| Ppa2     | 1614  | -1.37 | -0.45 | 1.6E-09 | -1.43 | -0.51 | 7.3E-12 |
| Ppard    | 2049  | 2.04  | 1.03  | 1.1E-12 | 1.97  | 0.98  | 1.2E-11 |
| Ppargc1a | 1179  | 1.65  | 0.72  | 2.5E-05 | 1.87  | 0.91  | 7.6E-08 |
| Ppargc1b | 174   | 2.17  | 1.12  | 5.2E-06 | 2.56  | 1.36  | 3.3E-08 |
| Ppat     | 4071  | 1.75  | 0.81  | 5.0E-09 | 1.64  | 0.72  | 2.3E-07 |
| Ppcdc    | 802   | -1.80 | -0.85 | 1.6E-41 | -1.78 | -0.83 | 9.3E-40 |
| Ppdpf    | 3917  | -1.37 | -0.45 | 5.9E-07 | -1.52 | -0.60 | 1.7E-11 |
| Ppfia3   | 3569  | 1.46  | 0.54  | 2.3E-03 | 1.34  | 0.42  | 2.1E-02 |
| Ppfibp1  | 5507  | 1.50  | 0.59  | 1.5E-04 | 1.64  | 0.71  | 3.8E-06 |
| Ppfibp2  | 512   | -1.85 | -0.89 | 2.4E-03 | -1.70 | -0.77 | 9.5E-03 |
| Pphln1   | 6579  | 1.33  | 0.42  | 7.9E-06 | 1.28  | 0.35  | 2.0E-04 |
| Ppia     | 52024 | -1.22 | -0.28 | 1.6E-02 | -1.26 | -0.34 | 3.9E-03 |
| Ppif     | 2242  | 1.39  | 0.48  | 2.2E-07 | 1.32  | 0.40  | 2.3E-05 |
| Ppih     | 1751  | -1.30 | -0.38 | 1.3E-02 | -1.36 | -0.44 | 3.5E-03 |
| Ppil3    | 1497  | -1.67 | -0.74 | 9.9E-22 | -1.71 | -0.78 | 6.1E-24 |
| Ppil6    | 216   | 3.62  | 1.86  | 5.0E-31 | 4.25  | 2.09  | 5.1E-38 |
| Ppm1b    | 10545 | 1.42  | 0.50  | 1.1E-11 | 1.32  | 0.40  | 9.3E-08 |
| Ppm1d    | 2918  | 1.33  | 0.41  | 2.6E-08 | 1.23  | 0.30  | 7.7E-05 |
| Ppm1e    | 10602 | 1.50  | 0.59  | 3.3E-03 | 1.58  | 0.66  | 8.8E-04 |
| Ppm1f    | 5811  | 1.26  | 0.34  | 1.6E-07 | 1.24  | 0.31  | 1.7E-06 |
| Ppm1g    | 15251 | 1.68  | 0.75  | 3.1E-13 | 1.49  | 0.57  | 3.7E-08 |
| Ppm1j    | 282   | 7.24  | 2.86  | 1.4E-36 | 7.60  | 2.93  | 4.4E-38 |
| Ppm1k    | 2258  | 2.52  | 1.33  | 9.3E-39 | 2.37  | 1.25  | 7.1E-34 |
| Ppme1    | 7854  | 1.40  | 0.48  | 4.5E-17 | 1.33  | 0.42  | 6.4E-13 |
| Ppox     | 4532  | 1.40  | 0.48  | 7.0E-15 | 1.33  | 0.41  | 7.5E-11 |
| Ppp1cb   | 23071 | -1.40 | -0.48 | 4.3E-10 | -1.40 | -0.49 | 2.9E-10 |
| Ppp1r12a | 8968  | -1.31 | -0.39 | 4.3E-11 | -1.28 | -0.36 | 3.0E-09 |
| Ppp1r12c | 6838  | 1.61  | 0.69  | 1.3E-18 | 1.53  | 0.61  | 7.4E-15 |
| Ppp1r13l | 1015  | 3.23  | 1.69  | 3.2E-23 | 3.11  | 1.64  | 9.1E-22 |
| Ppp1r14b | 7110  | -1.22 | -0.28 | 2.4E-02 | -1.36 | -0.45 | 2.3E-04 |
| Ppp1r15a | 1282  | 2.01  | 1.01  | 8.8E-23 | 2.09  | 1.06  | 5.4E-25 |
| Ppp1r16a | 3598  | 1.53  | 0.61  | 1.4E-12 | 1.41  | 0.50  | 1.2E-08 |
| Ppp1r16b | 1142  | 2.33  | 1.22  | 5.8E-12 | 2.21  | 1.14  | 1.3E-10 |
| Ppp1r1a  | 1826  | 1.60  | 0.68  | 5.5E-14 | 1.61  | 0.69  | 2.4E-14 |
| Ppp1r1b  | 299   | 3.35  | 1.74  | 1.3E-04 | 4.05  | 2.02  | 8.5E-06 |
| Ppp1r21  | 4118  | 1.26  | 0.33  | 3.6E-04 | 1.27  | 0.34  | 2.4E-04 |
| Ppp1r26  | 2297  | -1.33 | -0.41 | 1.9E-04 | -1.29 | -0.37 | 9.1E-04 |
| Ppp1r35  | 1343  | 1.72  | 0.78  | 2.9E-10 | 1.60  | 0.68  | 5.1E-08 |
| Ppp1r37  | 5590  | 1.35  | 0.43  | 4.0E-04 | 1.28  | 0.35  | 4.2E-03 |
| Ppp1r3d  | 343   | 2.40  | 1.26  | 1.8E-07 | 2.77  | 1.47  | 1.1E-09 |
| Ppp1r9a  | 8368  | -1.91 | -0.94 | 1.5E-09 | -1.65 | -0.72 | 3.9E-06 |
| Ppp2r1b  | 7788  | 1.54  | 0.62  | 2.2E-11 | 1.44  | 0.53  | 2.0E-08 |
| Ppp2r3c  | 3139  | -1.70 | -0.76 | 1.4E-14 | -1.61 | -0.69 | 3.3E-12 |
| Ppp2r5a  | 3114  | 1.63  | 0.71  | 1.6E-22 | 1.59  | 0.67  | 4.4E-20 |
| Ppp2r5d  | 10594 | 1.79  | 0.84  | 5.1E-25 | 1.68  | 0.75  | 2.5E-20 |

|         |       |       |       |          |       |       |         |
|---------|-------|-------|-------|----------|-------|-------|---------|
| Ppp3cb  | 14492 | -1.25 | -0.32 | 1.0E-02  | -1.29 | -0.37 | 3.0E-03 |
| Ppp3cc  | 516   | -1.27 | -0.34 | 6.9E-03  | -1.25 | -0.32 | 1.2E-02 |
| Ppp3r1  | 9679  | 1.35  | 0.43  | 3.6E-04  | 1.31  | 0.39  | 1.2E-03 |
| Ppp4r1  | 5377  | -1.79 | -0.84 | 5.1E-42  | -1.90 | -0.93 | 1.3E-50 |
| Ppp4r2  | 9308  | -1.40 | -0.48 | 3.3E-09  | -1.44 | -0.53 | 7.2E-11 |
| Ppp4r3a | 11173 | -1.34 | -0.42 | 1.9E-05  | -1.39 | -0.47 | 1.5E-06 |
| Ppp4r3b | 9651  | -1.28 | -0.35 | 1.0E-03  | -1.19 | -0.25 | 2.4E-02 |
| Ppp4r4  | 1187  | 2.34  | 1.23  | 1.0E-59  | 2.33  | 1.22  | 3.2E-58 |
| Pprc1   | 3855  | -1.56 | -0.64 | 4.9E-09  | -1.65 | -0.72 | 3.3E-11 |
| Ppt2    | 682   | 1.28  | 0.36  | 6.5E-03  | 1.37  | 0.46  | 4.5E-04 |
| Pptc7   | 2419  | 1.48  | 0.57  | 2.8E-15  | 1.39  | 0.48  | 4.0E-11 |
| Pradc1  | 708   | 1.82  | 0.87  | 5.0E-13  | 1.62  | 0.69  | 1.1E-08 |
| Prdm10  | 2700  | -3.68 | -1.88 | 9.2E-56  | -3.74 | -1.90 | 5.9E-57 |
| Prdm11  | 631   | -2.67 | -1.42 | 9.1E-11  | -2.36 | -1.24 | 1.9E-08 |
| Prdm12  | 651   | -1.97 | -0.98 | 1.7E-04  | -1.97 | -0.98 | 1.9E-04 |
| Prdm15  | 2046  | -2.70 | -1.43 | 1.6E-103 | -2.59 | -1.37 | 4.0E-95 |
| Prdm16  | 2577  | -2.00 | -1.00 | 2.8E-12  | -1.88 | -0.91 | 2.5E-10 |
| Prdm5   | 617   | -2.13 | -1.09 | 7.5E-11  | -2.15 | -1.10 | 4.6E-11 |
| Prdm6   | 324   | -2.15 | -1.10 | 2.1E-04  | -1.94 | -0.95 | 1.6E-03 |
| Prdm9   | 940   | 2.64  | 1.40  | 4.6E-31  | 2.47  | 1.31  | 4.5E-27 |
| Preb    | 8107  | 1.29  | 0.36  | 5.0E-11  | 1.22  | 0.28  | 5.4E-07 |
| Prelp   | 424   | -2.69 | -1.43 | 1.5E-07  | -2.39 | -1.26 | 4.8E-06 |
| Prepl   | 9915  | 1.22  | 0.29  | 7.9E-03  | 1.31  | 0.39  | 3.3E-04 |
| Prex1   | 6987  | 1.55  | 0.63  | 5.5E-08  | 1.62  | 0.69  | 2.4E-09 |
| Prex2   | 1360  | -1.96 | -0.97 | 1.3E-06  | -1.61 | -0.69 | 8.7E-04 |
| Prim2   | 3251  | 1.60  | 0.68  | 3.4E-07  | 1.58  | 0.66  | 9.0E-07 |
| Prkab2  | 3272  | 1.68  | 0.75  | 4.6E-33  | 1.73  | 0.79  | 4.9E-36 |
| Prkaca  | 10570 | 1.80  | 0.84  | 2.7E-22  | 1.62  | 0.69  | 2.1E-15 |
| Prkag1  | 3170  | -1.26 | -0.33 | 3.6E-12  | -1.35 | -0.43 | 2.8E-20 |
| Prkar2a | 12648 | 1.30  | 0.38  | 6.2E-08  | 1.27  | 0.34  | 8.6E-07 |
| Prkcd   | 4272  | 2.40  | 1.26  | 3.3E-53  | 2.53  | 1.34  | 1.2E-59 |
| Prkci   | 8204  | 1.84  | 0.88  | 1.0E-59  | 1.87  | 0.91  | 4.1E-63 |
| Prkcq   | 221   | -2.05 | -1.04 | 2.4E-05  | -1.89 | -0.91 | 2.3E-04 |
| Prkd1   | 1487  | 1.33  | 0.41  | 9.2E-03  | 1.33  | 0.42  | 8.9E-03 |
| Prkd2   | 1619  | 1.69  | 0.76  | 3.1E-11  | 1.65  | 0.72  | 3.4E-10 |
| Prkg2   | 504   | -1.90 | -0.93 | 1.5E-10  | -2.32 | -1.21 | 2.9E-17 |
| Prkx    | 4490  | 1.46  | 0.55  | 2.0E-06  | 1.44  | 0.52  | 7.1E-06 |
| Prmt1   | 19553 | -1.20 | -0.27 | 5.6E-03  | -1.31 | -0.38 | 4.2E-05 |
| Prmt3   | 1694  | -1.61 | -0.69 | 1.0E-20  | -1.69 | -0.76 | 8.8E-25 |
| Prmt5   | 9545  | 1.27  | 0.34  | 3.3E-05  | 1.18  | 0.24  | 4.3E-03 |
| Prmt8   | 1839  | -1.47 | -0.56 | 1.3E-03  | -1.41 | -0.50 | 4.8E-03 |
| Prmt9   | 2548  | 1.22  | 0.28  | 5.7E-04  | 1.29  | 0.37  | 6.1E-06 |
| Prnp    | 5047  | 1.51  | 0.60  | 1.0E-09  | 1.52  | 0.60  | 8.9E-10 |
| Prob1   | 989   | 2.01  | 1.01  | 3.1E-15  | 1.98  | 0.99  | 1.2E-14 |
| Procr   | 127   | -1.53 | -0.62 | 2.2E-03  | -1.53 | -0.61 | 2.4E-03 |
| Prokr1  | 903   | 1.71  | 0.77  | 1.2E-08  | 1.87  | 0.91  | 1.7E-11 |
| Prop    | 940   | -1.55 | -0.63 | 7.2E-13  | -1.72 | -0.78 | 4.1E-19 |



|         |       |       |       |         |       |       |         |
|---------|-------|-------|-------|---------|-------|-------|---------|
| Prorsd1 | 386   | -1.60 | -0.68 | 1.3E-05 | -1.78 | -0.83 | 7.6E-08 |
| Pros1   | 1393  | -1.42 | -0.51 | 5.8E-03 | -1.41 | -0.50 | 7.3E-03 |
| Proser2 | 244   | 1.84  | 0.88  | 9.4E-07 | 2.07  | 1.05  | 4.0E-09 |
| Proser3 | 1137  | -2.04 | -1.03 | 7.1E-13 | -2.24 | -1.16 | 5.1E-16 |
| Prpf3   | 4753  | 1.26  | 0.34  | 4.9E-05 | 1.19  | 0.25  | 3.5E-03 |
| Prpf6   | 9328  | 1.36  | 0.44  | 3.8E-11 | 1.33  | 0.41  | 1.2E-09 |
| Prps1   | 3960  | 1.34  | 0.42  | 3.5E-06 | 1.31  | 0.39  | 1.6E-05 |
| Prr15   | 502   | 2.11  | 1.08  | 4.1E-05 | 1.62  | 0.70  | 9.9E-03 |
| Prr16   | 220   | -2.05 | -1.03 | 3.8E-04 | -1.56 | -0.64 | 3.5E-02 |
| Prr18   | 491   | -3.50 | -1.81 | 3.6E-09 | -3.61 | -1.85 | 1.5E-09 |
| Prr36   | 5899  | -1.89 | -0.92 | 2.0E-05 | -2.20 | -1.14 | 9.2E-08 |
| Prr5    | 802   | 2.25  | 1.17  | 7.6E-13 | 2.07  | 1.05  | 1.3E-10 |
| Prr5l   | 656   | -2.22 | -1.15 | 3.9E-11 | -2.48 | -1.31 | 4.1E-14 |
| Prr7    | 478   | -1.68 | -0.75 | 8.2E-08 | -1.90 | -0.92 | 1.9E-11 |
| Prrg1   | 882   | -1.38 | -0.46 | 1.8E-05 | -1.30 | -0.38 | 5.3E-04 |
| Prrg2   | 447   | -2.32 | -1.21 | 1.3E-35 | -2.30 | -1.20 | 6.0E-35 |
| Prrg3   | 2698  | -1.36 | -0.44 | 5.9E-06 | -1.31 | -0.39 | 7.7E-05 |
| Prrg4   | 194   | 2.51  | 1.33  | 1.3E-05 | 3.23  | 1.69  | 2.4E-08 |
| Prrt3   | 270   | 1.56  | 0.64  | 6.3E-04 | 1.44  | 0.53  | 5.3E-03 |
| Prrx1   | 7465  | -3.31 | -1.73 | 2.9E-07 | -3.15 | -1.65 | 9.6E-07 |
| Prss23  | 1182  | -1.43 | -0.52 | 2.6E-02 | -1.52 | -0.60 | 9.2E-03 |
| Prss36  | 317   | -1.77 | -0.82 | 6.5E-25 | -1.65 | -0.72 | 1.7E-19 |
| Prune1  | 3326  | -1.33 | -0.42 | 9.5E-06 | -1.34 | -0.42 | 5.9E-06 |
| Prx     | 614   | -1.27 | -0.35 | 1.0E-02 | -1.33 | -0.41 | 2.3E-03 |
| Prxl2b  | 931   | 1.77  | 0.82  | 1.5E-15 | 1.70  | 0.77  | 1.2E-13 |
| Prxl2c  | 1128  | 1.56  | 0.64  | 2.0E-07 | 1.56  | 0.64  | 2.3E-07 |
| Psat1   | 17607 | 1.37  | 0.45  | 1.1E-05 | 1.33  | 0.41  | 5.6E-05 |
| Psen2   | 693   | 1.96  | 0.97  | 1.6E-27 | 1.90  | 0.93  | 4.1E-25 |
| Pskh1   | 1945  | -1.35 | -0.43 | 5.9E-03 | -1.43 | -0.52 | 9.3E-04 |
| Psma2   | 10930 | 1.26  | 0.33  | 1.4E-04 | 1.26  | 0.33  | 1.8E-04 |
| Psma5   | 8361  | 1.25  | 0.33  | 5.4E-04 | 1.20  | 0.27  | 5.6E-03 |
| Psmb10  | 401   | -1.57 | -0.65 | 6.3E-14 | -1.48 | -0.57 | 1.1E-10 |
| Psmd2   | 29334 | 1.27  | 0.35  | 6.7E-05 | 1.19  | 0.25  | 4.2E-03 |
| Psmd4   | 9072  | 1.27  | 0.34  | 8.8E-05 | 1.19  | 0.25  | 5.5E-03 |
| Psmd5   | 5393  | 1.29  | 0.37  | 2.5E-04 | 1.24  | 0.31  | 2.7E-03 |
| Psmd9   | 2434  | 1.38  | 0.47  | 1.2E-11 | 1.35  | 0.43  | 4.4E-10 |
| Psme4   | 24645 | 1.39  | 0.48  | 1.1E-06 | 1.42  | 0.50  | 2.9E-07 |
| Pspc1   | 5966  | -1.49 | -0.58 | 3.5E-08 | -1.56 | -0.64 | 8.0E-10 |
| Ptbp2   | 26867 | -1.53 | -0.62 | 5.5E-08 | -1.56 | -0.65 | 1.3E-08 |
| Ptbp3   | 8517  | 1.28  | 0.36  | 2.0E-02 | 1.44  | 0.53  | 4.8E-04 |
| Ptch1   | 7873  | -1.21 | -0.27 | 4.8E-04 | -1.26 | -0.34 | 1.1E-05 |
| Ptdss1  | 5032  | 1.32  | 0.40  | 6.1E-07 | 1.38  | 0.46  | 8.6E-09 |
| Pten    | 12976 | 1.37  | 0.45  | 3.9E-06 | 1.37  | 0.45  | 3.9E-06 |
| Ptger1  | 207   | 3.05  | 1.61  | 1.8E-10 | 3.58  | 1.84  | 2.1E-13 |
| Ptger4  | 131   | 2.02  | 1.01  | 5.4E-03 | 2.75  | 1.46  | 4.6E-05 |
| Ptges   | 739   | 2.61  | 1.39  | 5.4E-06 | 2.58  | 1.37  | 7.6E-06 |
| Ptges2  | 1580  | 1.71  | 0.77  | 8.9E-27 | 1.68  | 0.75  | 4.3E-25 |

|         |       |       |       |         |       |       |         |
|---------|-------|-------|-------|---------|-------|-------|---------|
| Ptgfr   | 113   | -5.61 | -2.49 | 9.9E-17 | -6.27 | -2.65 | 3.9E-18 |
| Pth1r   | 1324  | -1.60 | -0.67 | 5.9E-03 | -1.55 | -0.63 | 1.1E-02 |
| Ptk2b   | 117   | 1.75  | 0.80  | 1.6E-03 | 1.68  | 0.75  | 3.7E-03 |
| Ptk7    | 9855  | 1.29  | 0.36  | 1.8E-02 | 1.27  | 0.35  | 2.5E-02 |
| Ptms    | 25036 | -1.32 | -0.40 | 2.7E-02 | -1.44 | -0.52 | 3.6E-03 |
| Ptn     | 20272 | -1.55 | -0.63 | 9.6E-05 | -1.46 | -0.54 | 9.5E-04 |
| Ptp4a3  | 1474  | -1.60 | -0.68 | 1.3E-12 | -1.62 | -0.69 | 5.0E-13 |
| Ptpa    | 9367  | -1.29 | -0.36 | 3.5E-08 | -1.39 | -0.48 | 2.4E-13 |
| Ptpn1   | 7485  | 1.59  | 0.67  | 8.2E-10 | 1.45  | 0.53  | 1.3E-06 |
| Ptpn11  | 16665 | 1.31  | 0.39  | 9.8E-16 | 1.27  | 0.35  | 8.7E-13 |
| Ptpn12  | 6041  | -1.37 | -0.45 | 2.4E-10 | -1.41 | -0.50 | 2.4E-12 |
| Ptpn13  | 8616  | 2.15  | 1.11  | 1.0E-18 | 2.34  | 1.23  | 8.8E-23 |
| Ptpn2   | 2285  | -1.75 | -0.81 | 1.3E-31 | -1.78 | -0.83 | 3.6E-33 |
| Ptpn3   | 1467  | 2.06  | 1.05  | 4.5E-04 | 2.66  | 1.41  | 1.4E-06 |
| Ptpn4   | 9452  | 1.32  | 0.41  | 1.6E-02 | 1.60  | 0.68  | 3.4E-05 |
| Ptpn5   | 4140  | -1.59 | -0.67 | 1.2E-02 | -1.49 | -0.57 | 3.7E-02 |
| Ptpn6   | 230   | -1.42 | -0.50 | 3.0E-02 | -1.58 | -0.66 | 4.0E-03 |
| Ptpn9   | 4302  | -1.82 | -0.87 | 2.3E-30 | -1.88 | -0.91 | 3.8E-33 |
| Ptprb   | 1124  | -1.77 | -0.82 | 2.0E-08 | -1.83 | -0.87 | 2.6E-09 |
| Ptprn   | 2345  | 1.94  | 0.95  | 5.4E-07 | 1.85  | 0.89  | 3.4E-06 |
| Ptpro   | 3982  | -1.70 | -0.77 | 1.0E-02 | -1.67 | -0.74 | 1.4E-02 |
| Ptpru   | 5216  | 1.56  | 0.65  | 3.2E-06 | 1.49  | 0.58  | 3.5E-05 |
| Ptrh1   | 274   | 2.08  | 1.05  | 4.2E-16 | 1.97  | 0.98  | 6.8E-14 |
| Ptrh2   | 3006  | -1.27 | -0.34 | 4.6E-04 | -1.33 | -0.41 | 2.1E-05 |
| Ptrhd1  | 365   | -3.12 | -1.64 | 2.2E-44 | -3.60 | -1.85 | 2.7E-55 |
| Pts     | 2565  | -1.37 | -0.46 | 3.0E-12 | -1.39 | -0.48 | 3.5E-13 |
| Pttg1   | 1147  | 1.89  | 0.92  | 2.0E-16 | 1.92  | 0.94  | 5.6E-17 |
| Pttg1ip | 4768  | 1.30  | 0.38  | 1.4E-04 | 1.28  | 0.35  | 3.9E-04 |
| Ptx3    | 1640  | -3.37 | -1.75 | 2.4E-20 | -3.61 | -1.85 | 1.3E-22 |
| Puf60   | 8826  | -1.63 | -0.70 | 1.2E-15 | -1.79 | -0.84 | 8.1E-22 |
| Pum1    | 8711  | -1.32 | -0.40 | 1.7E-03 | -1.43 | -0.52 | 4.2E-05 |
| Pum2    | 25350 | -1.43 | -0.52 | 4.5E-08 | -1.39 | -0.47 | 6.8E-07 |
| Pura    | 2394  | 1.32  | 0.40  | 2.7E-05 | 1.35  | 0.43  | 5.1E-06 |
| Purg    | 3082  | 1.28  | 0.36  | 3.3E-03 | 1.22  | 0.29  | 1.9E-02 |
| Pus10   | 3922  | 1.28  | 0.35  | 1.6E-03 | 1.33  | 0.42  | 1.8E-04 |
| Pus3    | 1379  | -2.12 | -1.08 | 2.1E-27 | -2.09 | -1.06 | 2.2E-26 |
| Pus7    | 3393  | 1.79  | 0.84  | 1.7E-45 | 1.76  | 0.82  | 3.4E-43 |
| Pusl1   | 1434  | 1.60  | 0.67  | 1.1E-23 | 1.61  | 0.69  | 1.0E-24 |
| Pvr     | 426   | -2.25 | -1.17 | 3.1E-12 | -2.10 | -1.07 | 2.4E-10 |
| Pwwp2a  | 3963  | -1.25 | -0.33 | 4.5E-04 | -1.36 | -0.45 | 9.1E-07 |
| Pwwp3b  | 3399  | 2.53  | 1.34  | 1.8E-23 | 2.67  | 1.42  | 3.2E-26 |
| Pxdn    | 15773 | -1.48 | -0.57 | 4.5E-05 | -1.38 | -0.46 | 1.1E-03 |
| Pxk     | 3371  | 1.63  | 0.70  | 6.0E-11 | 1.73  | 0.79  | 1.1E-13 |
| Pxmp2   | 307   | 2.17  | 1.12  | 5.6E-26 | 2.39  | 1.25  | 7.7E-32 |
| Pxmp4   | 1007  | 1.50  | 0.58  | 1.7E-07 | 1.43  | 0.52  | 3.8E-06 |
| Pxn     | 6562  | 2.24  | 1.16  | 1.4E-25 | 2.20  | 1.14  | 1.2E-24 |
| Pxylp1  | 3755  | 1.40  | 0.49  | 2.0E-10 | 1.42  | 0.50  | 5.2E-11 |

|           |       |       |       |         |       |       |         |
|-----------|-------|-------|-------|---------|-------|-------|---------|
| Pycard    | 123   | -1.78 | -0.83 | 2.5E-03 | -1.53 | -0.62 | 2.9E-02 |
| Pygb      | 14633 | 1.74  | 0.80  | 1.1E-27 | 1.76  | 0.82  | 1.1E-28 |
| Pygo1     | 5395  | -2.65 | -1.40 | 8.7E-22 | -2.40 | -1.27 | 6.8E-18 |
| Pym1      | 1562  | -1.86 | -0.89 | 7.4E-17 | -1.95 | -0.96 | 1.7E-19 |
| Pyroxd1   | 1521  | -1.68 | -0.74 | 3.7E-25 | -1.55 | -0.63 | 1.6E-18 |
| Pyroxd2   | 193   | -1.33 | -0.42 | 1.5E-02 | -1.31 | -0.39 | 2.7E-02 |
| Qars      | 9485  | 1.42  | 0.51  | 6.9E-06 | 1.34  | 0.43  | 1.9E-04 |
| Qdpr      | 4362  | 1.55  | 0.64  | 4.2E-11 | 1.50  | 0.58  | 1.8E-09 |
| Qk        | 28560 | -1.64 | -0.71 | 2.5E-12 | -1.70 | -0.77 | 3.4E-14 |
| Qpctl     | 1773  | 1.64  | 0.71  | 1.6E-28 | 1.58  | 0.66  | 1.3E-24 |
| Qrich1    | 7228  | -1.22 | -0.29 | 1.2E-05 | -1.33 | -0.41 | 2.3E-10 |
| Qrs11     | 916   | -2.30 | -1.20 | 8.3E-54 | -2.15 | -1.10 | 3.2E-45 |
| Qser1     | 10610 | -1.36 | -0.44 | 1.8E-05 | -1.33 | -0.41 | 8.5E-05 |
| Qsox1     | 3638  | 1.72  | 0.78  | 1.6E-19 | 1.74  | 0.80  | 1.8E-20 |
| Qsox2     | 2118  | 1.41  | 0.50  | 3.4E-09 | 1.33  | 0.41  | 1.7E-06 |
| R3hdm2    | 7116  | -1.65 | -0.72 | 3.2E-09 | -1.76 | -0.81 | 2.3E-11 |
| Rab11b    | 7660  | -2.06 | -1.05 | 2.8E-39 | -2.14 | -1.10 | 2.2E-43 |
| Rab11fip1 | 1229  | 4.58  | 2.20  | 8.2E-26 | 4.36  | 2.12  | 3.4E-24 |
| Rab11fip2 | 3691  | -2.07 | -1.05 | 1.4E-21 | -2.06 | -1.04 | 4.2E-21 |
| Rab11fip5 | 3422  | 2.08  | 1.05  | 6.9E-20 | 2.09  | 1.06  | 3.7E-20 |
| Rab12     | 5690  | 1.35  | 0.43  | 6.6E-07 | 1.28  | 0.36  | 4.0E-05 |
| Rab15     | 1617  | -1.75 | -0.81 | 2.0E-06 | -1.69 | -0.76 | 9.5E-06 |
| Rab1b     | 6869  | -1.52 | -0.61 | 7.0E-18 | -1.59 | -0.67 | 7.7E-22 |
| Rab20     | 106   | 6.47  | 2.69  | 1.2E-23 | 6.84  | 2.77  | 1.0E-24 |
| Rab21     | 5093  | 1.43  | 0.51  | 6.9E-07 | 1.31  | 0.39  | 2.1E-04 |
| Rab26     | 128   | 8.08  | 3.01  | 1.4E-67 | 5.99  | 2.58  | 4.1E-53 |
| Rab27b    | 323   | -1.67 | -0.74 | 2.1E-03 | -1.58 | -0.66 | 7.3E-03 |
| Rab29     | 307   | -1.29 | -0.37 | 3.9E-03 | -1.33 | -0.41 | 1.3E-03 |
| Rab2b     | 2907  | -1.24 | -0.31 | 5.1E-06 | -1.28 | -0.35 | 1.1E-07 |
| Rab32     | 377   | -1.39 | -0.48 | 2.0E-02 | -1.37 | -0.45 | 3.0E-02 |
| Rab33a    | 707   | -1.67 | -0.74 | 2.4E-05 | -1.63 | -0.71 | 5.0E-05 |
| Rab34     | 1804  | -2.39 | -1.26 | 9.4E-51 | -2.48 | -1.31 | 5.4E-55 |
| Rab37     | 184   | 2.33  | 1.22  | 5.5E-09 | 2.47  | 1.30  | 5.1E-10 |
| Rab39     | 642   | 3.61  | 1.85  | 2.3E-66 | 3.29  | 1.72  | 9.2E-58 |
| Rab3d     | 2350  | 2.68  | 1.42  | 2.9E-75 | 2.54  | 1.34  | 2.4E-67 |
| Rab3gap1  | 2905  | -1.47 | -0.56 | 4.9E-34 | -1.40 | -0.48 | 1.2E-25 |
| Rab3gap2  | 5920  | 1.24  | 0.31  | 1.5E-04 | 1.31  | 0.39  | 1.1E-06 |
| Rab3il1   | 2078  | 1.36  | 0.44  | 1.2E-02 | 1.32  | 0.41  | 2.2E-02 |
| Rab3ip    | 3408  | 2.08  | 1.05  | 6.1E-46 | 1.96  | 0.97  | 6.2E-39 |
| Rab40b    | 500   | 2.63  | 1.39  | 5.6E-15 | 2.94  | 1.56  | 2.4E-18 |
| Rab40c    | 3116  | 1.63  | 0.70  | 2.4E-13 | 1.53  | 0.62  | 1.7E-10 |
| Rab4a     | 1257  | 1.46  | 0.55  | 6.4E-16 | 1.38  | 0.47  | 8.2E-12 |
| Rab5if    | 4432  | 1.64  | 0.71  | 2.8E-21 | 1.59  | 0.67  | 8.2E-19 |
| Rab6a     | 18719 | 1.25  | 0.33  | 2.4E-03 | 1.20  | 0.26  | 1.8E-02 |
| Rab8a     | 6226  | 1.33  | 0.41  | 6.5E-07 | 1.22  | 0.29  | 6.1E-04 |
| Rab8b     | 7534  | 1.33  | 0.41  | 8.0E-11 | 1.29  | 0.37  | 1.0E-08 |
| Rab9      | 2389  | 1.27  | 0.35  | 2.2E-05 | 1.29  | 0.37  | 8.5E-06 |

|          |       |       |       |         |       |       |         |
|----------|-------|-------|-------|---------|-------|-------|---------|
| Rab9b    | 861   | -1.48 | -0.57 | 1.2E-02 | -1.49 | -0.57 | 1.1E-02 |
| Rabac1   | 2232  | 1.30  | 0.38  | 9.0E-04 | 1.39  | 0.47  | 3.5E-05 |
| Rabep1   | 11994 | 1.35  | 0.43  | 3.8E-05 | 1.42  | 0.51  | 1.1E-06 |
| Rabep2   | 905   | -1.39 | -0.47 | 1.1E-07 | -1.50 | -0.58 | 4.3E-11 |
| Rabepk   | 1136  | 1.66  | 0.73  | 9.7E-18 | 1.68  | 0.75  | 2.1E-18 |
| Rabgap1  | 11993 | 1.24  | 0.31  | 7.8E-06 | 1.27  | 0.35  | 6.7E-07 |
| Rabgef1  | 2176  | 1.32  | 0.40  | 2.1E-08 | 1.30  | 0.38  | 1.5E-07 |
| Rabggta  | 1174  | -1.70 | -0.76 | 2.2E-19 | -1.78 | -0.83 | 1.3E-22 |
| Rabif    | 2051  | -1.70 | -0.76 | 1.9E-35 | -1.72 | -0.78 | 3.7E-37 |
| Rabl2    | 2848  | 1.43  | 0.52  | 8.9E-13 | 1.33  | 0.41  | 2.8E-08 |
| Rabl3    | 1138  | -2.47 | -1.31 | 7.6E-19 | -2.78 | -1.47 | 1.3E-23 |
| Rabl6    | 6117  | -1.21 | -0.28 | 2.3E-07 | -1.27 | -0.35 | 6.1E-11 |
| Rad21    | 24544 | -1.30 | -0.38 | 9.2E-06 | -1.37 | -0.46 | 7.5E-08 |
| Rad23a   | 2592  | -1.25 | -0.33 | 2.1E-03 | -1.33 | -0.42 | 6.8E-05 |
| Rad51c   | 899   | -1.27 | -0.35 | 1.0E-02 | -1.43 | -0.51 | 8.5E-05 |
| Rad54l   | 3943  | 1.44  | 0.53  | 1.0E-02 | 1.36  | 0.44  | 3.4E-02 |
| Rad9b    | 923   | -1.31 | -0.39 | 1.0E-04 | -1.22 | -0.29 | 5.1E-03 |
| Radil    | 654   | 1.45  | 0.53  | 2.3E-03 | 1.32  | 0.40  | 2.6E-02 |
| Raet1d   | 244   | -1.51 | -0.59 | 2.3E-02 | -1.53 | -0.62 | 1.8E-02 |
| Raf1     | 11657 | -1.62 | -0.69 | 2.3E-24 | -1.60 | -0.68 | 1.8E-23 |
| Rai1     | 7722  | -1.57 | -0.65 | 2.5E-07 | -1.56 | -0.64 | 3.3E-07 |
| Rai14    | 9557  | -1.43 | -0.52 | 4.4E-04 | -1.35 | -0.43 | 4.2E-03 |
| Ralb     | 3292  | 1.43  | 0.52  | 3.4E-08 | 1.49  | 0.57  | 1.0E-09 |
| Ralgapa2 | 4401  | 1.38  | 0.46  | 5.3E-04 | 1.45  | 0.53  | 5.3E-05 |
| Raly     | 16070 | 1.36  | 0.45  | 9.1E-05 | 1.24  | 0.31  | 7.2E-03 |
| Ramp2    | 694   | -2.41 | -1.27 | 5.4E-48 | -2.40 | -1.26 | 2.5E-47 |
| Ranbp17  | 928   | -1.59 | -0.67 | 3.6E-07 | -1.48 | -0.57 | 1.9E-05 |
| Ranbp3   | 6406  | -1.16 | -0.21 | 1.3E-02 | -1.27 | -0.34 | 2.8E-05 |
| Rangap1  | 18532 | 1.47  | 0.56  | 2.1E-06 | 1.34  | 0.42  | 4.4E-04 |
| Rangrf   | 981   | 1.83  | 0.87  | 5.0E-09 | 1.62  | 0.69  | 4.5E-06 |
| Rap2a    | 5118  | 1.39  | 0.47  | 1.4E-09 | 1.32  | 0.40  | 5.1E-07 |
| Rap2c    | 7466  | -1.25 | -0.33 | 5.2E-06 | -1.24 | -0.31 | 1.8E-05 |
| Rapgef1  | 10436 | -1.42 | -0.50 | 2.9E-06 | -1.50 | -0.59 | 4.5E-08 |
| Rapgef5  | 5201  | -1.58 | -0.66 | 1.3E-03 | -1.44 | -0.53 | 1.1E-02 |
| Rapgefl1 | 1691  | 2.22  | 1.15  | 2.2E-13 | 2.22  | 1.15  | 1.9E-13 |
| Rarb     | 1030  | -2.09 | -1.07 | 2.6E-05 | -2.27 | -1.18 | 3.0E-06 |
| Rarg     | 1854  | -2.08 | -1.05 | 4.1E-04 | -2.10 | -1.07 | 3.5E-04 |
| Rars     | 8480  | 1.33  | 0.41  | 7.7E-04 | 1.32  | 0.40  | 1.1E-03 |
| Rasa2    | 2217  | -1.84 | -0.88 | 3.1E-20 | -1.72 | -0.78 | 3.9E-16 |
| Rasa3    | 4266  | 1.67  | 0.74  | 2.3E-36 | 1.65  | 0.72  | 1.1E-34 |
| Rasa4    | 1701  | 2.43  | 1.28  | 1.7E-23 | 2.39  | 1.26  | 1.5E-22 |
| Rasd2    | 225   | 6.17  | 2.62  | 6.5E-09 | 6.48  | 2.70  | 2.6E-09 |
| Rasgef1c | 131   | -1.99 | -0.99 | 9.5E-03 | -1.77 | -0.82 | 3.6E-02 |
| Rasgrf1  | 381   | 3.65  | 1.87  | 1.8E-07 | 4.38  | 2.13  | 2.2E-09 |
| Rasgrp3  | 853   | -1.68 | -0.75 | 7.6E-15 | -1.58 | -0.66 | 9.9E-12 |
| Rasip1   | 598   | -2.20 | -1.14 | 8.0E-19 | -2.21 | -1.14 | 6.2E-19 |
| Rasl10b  | 3257  | 1.71  | 0.77  | 8.4E-06 | 1.66  | 0.73  | 2.5E-05 |

|         |       |       |       |         |       |       |         |
|---------|-------|-------|-------|---------|-------|-------|---------|
| Rasl11a | 248   | -1.31 | -0.39 | 2.9E-02 | -1.44 | -0.53 | 2.8E-03 |
| Rasl12  | 406   | -1.26 | -0.33 | 3.1E-04 | -1.15 | -0.20 | 3.5E-02 |
| Rassf2  | 7103  | 1.57  | 0.66  | 1.4E-13 | 1.44  | 0.52  | 4.6E-09 |
| Rassf3  | 1707  | 1.53  | 0.61  | 3.3E-03 | 1.59  | 0.67  | 1.3E-03 |
| Rassf4  | 6296  | 2.38  | 1.25  | 5.6E-14 | 2.84  | 1.51  | 7.1E-20 |
| Rassf5  | 168   | 1.54  | 0.62  | 2.2E-02 | 1.66  | 0.74  | 6.4E-03 |
| Rassf7  | 1195  | 2.10  | 1.07  | 7.9E-19 | 1.96  | 0.97  | 1.4E-15 |
| Rassf8  | 2738  | 1.47  | 0.55  | 4.1E-08 | 1.49  | 0.58  | 9.4E-09 |
| Rassf9  | 175   | -2.44 | -1.29 | 2.7E-09 | -2.25 | -1.17 | 7.5E-08 |
| Raver2  | 2460  | 1.54  | 0.62  | 4.5E-07 | 1.63  | 0.70  | 8.9E-09 |
| Rb1     | 8425  | 1.44  | 0.53  | 4.1E-06 | 1.56  | 0.64  | 1.6E-08 |
| Rbbp8   | 3246  | -1.31 | -0.39 | 1.1E-02 | -1.33 | -0.41 | 7.2E-03 |
| Rbbp9   | 3562  | -1.56 | -0.64 | 5.5E-20 | -1.59 | -0.67 | 1.1E-21 |
| Rbfa    | 1318  | 1.87  | 0.90  | 2.2E-22 | 1.69  | 0.76  | 3.3E-16 |
| Rbfox2  | 29853 | -1.30 | -0.38 | 1.0E-02 | -1.27 | -0.35 | 1.9E-02 |
| Rbl1    | 4163  | -1.38 | -0.46 | 8.9E-04 | -1.42 | -0.51 | 2.6E-04 |
| Rbl2    | 3008  | 1.45  | 0.54  | 8.8E-16 | 1.47  | 0.56  | 8.1E-17 |
| Rbm10   | 7185  | -1.51 | -0.60 | 1.5E-12 | -1.65 | -0.73 | 4.9E-18 |
| Rbm11   | 391   | 4.61  | 2.20  | 3.3E-54 | 4.74  | 2.25  | 3.2E-56 |
| Rbm12   | 3524  | -1.73 | -0.79 | 7.4E-15 | -1.85 | -0.88 | 2.0E-18 |
| Rbm19   | 1975  | -1.70 | -0.76 | 5.1E-12 | -1.89 | -0.92 | 6.2E-17 |
| Rbm20   | 667   | -1.83 | -0.88 | 6.6E-09 | -1.82 | -0.86 | 1.1E-08 |
| Rbm22   | 4983  | -1.33 | -0.42 | 6.2E-05 | -1.47 | -0.56 | 5.1E-08 |
| Rbm25   | 24288 | -1.46 | -0.54 | 1.8E-08 | -1.46 | -0.54 | 1.9E-08 |
| Rbm28   | 10895 | 1.36  | 0.44  | 1.1E-20 | 1.39  | 0.47  | 3.3E-23 |
| Rbm3    | 18751 | -1.37 | -0.46 | 4.9E-04 | -1.49 | -0.57 | 1.1E-05 |
| Rbm33   | 11486 | -1.50 | -0.59 | 3.8E-08 | -1.41 | -0.50 | 3.5E-06 |
| Rbm34   | 3179  | 1.35  | 0.44  | 3.3E-07 | 1.27  | 0.35  | 6.5E-05 |
| Rbm38   | 2168  | 1.82  | 0.86  | 5.9E-06 | 1.59  | 0.67  | 6.0E-04 |
| Rbm39   | 32934 | -1.94 | -0.95 | 4.7E-46 | -1.83 | -0.87 | 1.8E-38 |
| Rbm43   | 384   | -1.49 | -0.57 | 5.0E-05 | -1.49 | -0.57 | 5.5E-05 |
| Rbm46   | 346   | 1.48  | 0.56  | 8.2E-03 | 1.69  | 0.76  | 3.0E-04 |
| Rbm47   | 199   | -2.66 | -1.41 | 2.1E-12 | -2.81 | -1.49 | 1.0E-13 |
| Rbm4b   | 5862  | -2.10 | -1.07 | 2.0E-22 | -2.03 | -1.02 | 2.6E-20 |
| Rbm5    | 23084 | -1.69 | -0.75 | 7.4E-24 | -1.61 | -0.69 | 6.4E-20 |
| Rbms1   | 4901  | -1.84 | -0.88 | 1.6E-05 | -1.70 | -0.76 | 2.2E-04 |
| Rbms2   | 3710  | 1.40  | 0.49  | 1.4E-04 | 1.42  | 0.50  | 8.1E-05 |
| Rbmx    | 23217 | -1.48 | -0.57 | 1.3E-10 | -1.51 | -0.60 | 1.3E-11 |
| Rbpj    | 11332 | -1.25 | -0.32 | 4.8E-06 | -1.29 | -0.37 | 1.5E-07 |
| Rbpms2  | 573   | 1.66  | 0.73  | 1.7E-03 | 1.43  | 0.52  | 3.1E-02 |
| Rbsn    | 4618  | -1.35 | -0.43 | 1.0E-22 | -1.33 | -0.42 | 8.4E-21 |
| Rbx1    | 7621  | -1.51 | -0.60 | 1.4E-15 | -1.55 | -0.63 | 3.6E-17 |
| Rcan1   | 3802  | 1.67  | 0.74  | 4.1E-27 | 1.59  | 0.67  | 4.6E-22 |
| Rcbtb2  | 5810  | -3.41 | -1.77 | 4.0E-51 | -3.46 | -1.79 | 2.5E-52 |
| Rcc1l   | 1129  | -1.21 | -0.28 | 2.7E-02 | -1.34 | -0.42 | 6.3E-04 |
| Rcc2    | 17690 | -1.39 | -0.47 | 5.7E-03 | -1.57 | -0.65 | 1.0E-04 |
| Rchy1   | 3161  | -1.30 | -0.38 | 2.9E-12 | -1.34 | -0.42 | 6.3E-15 |

|         |       |       |       |         |       |       |         |
|---------|-------|-------|-------|---------|-------|-------|---------|
| Rcl1    | 1965  | 2.16  | 1.11  | 3.3E-21 | 2.11  | 1.07  | 6.3E-20 |
| Rcn2    | 10029 | -1.39 | -0.48 | 2.0E-07 | -1.48 | -0.57 | 6.5E-10 |
| Rcor3   | 680   | -1.75 | -0.81 | 1.2E-08 | -1.52 | -0.60 | 3.3E-05 |
| Rcsd1   | 870   | -1.67 | -0.74 | 1.0E-06 | -1.67 | -0.74 | 9.3E-07 |
| Rdh11   | 3707  | 1.44  | 0.52  | 1.3E-13 | 1.45  | 0.53  | 3.5E-14 |
| Rdh12   | 110   | 1.33  | 0.42  | 1.3E-02 | 1.76  | 0.81  | 3.8E-07 |
| Rdh13   | 2792  | 1.34  | 0.42  | 6.4E-14 | 1.28  | 0.36  | 3.4E-10 |
| Rdh14   | 769   | -1.89 | -0.92 | 2.4E-20 | -1.92 | -0.94 | 2.2E-21 |
| Rdm1    | 1015  | -1.26 | -0.33 | 5.5E-03 | -1.34 | -0.42 | 3.5E-04 |
| Recql   | 4098  | 1.34  | 0.43  | 2.5E-08 | 1.30  | 0.38  | 6.9E-07 |
| Reep3   | 6903  | -1.26 | -0.33 | 5.0E-10 | -1.26 | -0.33 | 5.5E-10 |
| Reep4   | 1519  | 1.61  | 0.69  | 2.2E-05 | 1.46  | 0.55  | 9.5E-04 |
| Reep6   | 623   | 6.74  | 2.75  | 3.5E-44 | 6.43  | 2.68  | 6.0E-42 |
| Rel     | 493   | 2.35  | 1.23  | 7.1E-19 | 2.56  | 1.36  | 2.1E-22 |
| Rela    | 1932  | -1.48 | -0.57 | 8.0E-09 | -1.63 | -0.70 | 4.3E-13 |
| Relch   | 6621  | 1.42  | 0.50  | 4.6E-06 | 1.55  | 0.63  | 5.1E-09 |
| Rel1    | 2397  | 2.36  | 1.24  | 7.2E-47 | 2.29  | 1.20  | 7.3E-44 |
| Rel2    | 1180  | 1.72  | 0.79  | 1.9E-03 | 1.74  | 0.80  | 1.5E-03 |
| Relt    | 367   | 2.54  | 1.34  | 2.0E-46 | 2.58  | 1.37  | 2.8E-47 |
| Resf1   | 3872  | -1.48 | -0.57 | 2.0E-21 | -1.44 | -0.53 | 2.4E-18 |
| Retreg3 | 7186  | 1.31  | 0.39  | 8.9E-17 | 1.25  | 0.32  | 1.0E-11 |
| Retsat  | 307   | -1.42 | -0.51 | 1.1E-03 | -1.40 | -0.48 | 2.0E-03 |
| Rex1bd  | 1297  | -1.27 | -0.34 | 1.4E-04 | -1.36 | -0.45 | 4.2E-07 |
| Rfc5    | 2500  | -1.38 | -0.46 | 1.0E-03 | -1.56 | -0.64 | 3.0E-06 |
| Rffl    | 1871  | 1.99  | 0.99  | 1.5E-17 | 1.91  | 0.94  | 1.1E-15 |
| Rfk     | 4664  | 1.52  | 0.60  | 4.2E-12 | 1.42  | 0.51  | 6.4E-09 |
| Rft1    | 805   | -1.94 | -0.96 | 6.4E-31 | -1.97 | -0.98 | 3.6E-32 |
| Rftn2   | 1295  | -1.42 | -0.50 | 1.5E-06 | -1.33 | -0.41 | 1.1E-04 |
| Rfx1    | 2234  | -1.48 | -0.56 | 7.1E-06 | -1.53 | -0.61 | 8.7E-07 |
| Rfx2    | 1128  | 2.57  | 1.36  | 5.9E-26 | 2.32  | 1.21  | 9.6E-21 |
| Rfx3    | 5786  | -1.47 | -0.56 | 5.0E-08 | -1.45 | -0.53 | 2.2E-07 |
| Rfx4    | 2512  | -1.73 | -0.79 | 7.1E-04 | -1.78 | -0.83 | 3.4E-04 |
| Rfxap   | 1885  | 1.46  | 0.54  | 2.2E-16 | 1.41  | 0.49  | 8.7E-14 |
| Rgcc    | 529   | -1.42 | -0.50 | 3.9E-03 | -1.35 | -0.44 | 1.3E-02 |
| Rgl1    | 3228  | 1.52  | 0.60  | 6.8E-18 | 1.44  | 0.53  | 5.9E-14 |
| Rgl3    | 463   | 4.98  | 2.32  | 1.2E-41 | 4.13  | 2.05  | 6.5E-33 |
| Rgma    | 6011  | -1.29 | -0.37 | 3.3E-02 | -1.36 | -0.45 | 8.9E-03 |
| Rgs10   | 538   | 1.84  | 0.88  | 1.0E-06 | 1.74  | 0.80  | 9.7E-06 |
| Rgs12   | 7398  | -1.51 | -0.60 | 2.5E-09 | -1.68 | -0.75 | 5.5E-14 |
| Rgs13   | 112   | -1.71 | -0.78 | 2.0E-02 | -2.13 | -1.09 | 7.2E-04 |
| Rgs17   | 1821  | 1.36  | 0.45  | 4.5E-02 | 1.55  | 0.63  | 3.9E-03 |
| Rgs19   | 1294  | -1.42 | -0.50 | 7.4E-12 | -1.51 | -0.59 | 4.1E-16 |
| Rgs3    | 2881  | -1.74 | -0.80 | 1.1E-19 | -1.75 | -0.80 | 4.5E-20 |
| Rgs9bp  | 472   | 8.35  | 3.06  | 4.3E-75 | 6.94  | 2.80  | 4.6E-63 |
| Rhbdd3  | 1075  | -1.59 | -0.67 | 9.8E-14 | -1.67 | -0.74 | 2.0E-16 |
| Rhbdf2  | 535   | 3.88  | 1.96  | 2.4E-17 | 3.98  | 1.99  | 7.1E-18 |
| Rhbd11  | 202   | 2.57  | 1.36  | 2.7E-11 | 2.56  | 1.36  | 4.0E-11 |



|          |       |       |       |         |       |       |         |
|----------|-------|-------|-------|---------|-------|-------|---------|
| Rheb1    | 1255  | 1.58  | 0.66  | 2.5E-14 | 1.51  | 0.60  | 4.2E-12 |
| Rhobtb1  | 1395  | -3.17 | -1.66 | 3.8E-53 | -3.37 | -1.75 | 1.2E-58 |
| Rhobtb3  | 9159  | -1.40 | -0.49 | 2.7E-05 | -1.44 | -0.53 | 4.8E-06 |
| Rhof     | 450   | 2.70  | 1.44  | 1.9E-30 | 2.77  | 1.47  | 1.1E-31 |
| Rhoj     | 1113  | -2.65 | -1.41 | 9.4E-18 | -2.44 | -1.28 | 5.7E-15 |
| Rhot2    | 1656  | 1.44  | 0.53  | 6.0E-05 | 1.27  | 0.35  | 1.1E-02 |
| Rhou     | 2734  | -1.48 | -0.56 | 1.1E-07 | -1.63 | -0.70 | 2.5E-11 |
| Rhpn1    | 1963  | 2.82  | 1.49  | 1.1E-36 | 2.53  | 1.34  | 9.8E-30 |
| Rhpn2    | 911   | 6.67  | 2.74  | 5.4E-70 | 7.27  | 2.86  | 1.1E-75 |
| Ric1     | 8113  | 1.48  | 0.56  | 4.6E-07 | 1.67  | 0.74  | 2.3E-11 |
| Riad1    | 398   | 1.92  | 0.94  | 1.0E-11 | 1.94  | 0.95  | 8.2E-12 |
| Rilpl1   | 1682  | 2.15  | 1.10  | 5.9E-24 | 2.05  | 1.03  | 4.1E-21 |
| Rilpl2   | 1121  | 2.40  | 1.26  | 1.8E-34 | 2.27  | 1.18  | 2.8E-30 |
| Rimbp3   | 433   | 2.31  | 1.21  | 1.9E-13 | 2.35  | 1.23  | 7.1E-14 |
| Rims2    | 3497  | -1.38 | -0.47 | 1.1E-02 | -1.48 | -0.57 | 1.7E-03 |
| Rims3    | 4156  | 1.95  | 0.97  | 2.0E-08 | 1.98  | 0.98  | 1.2E-08 |
| Rims4    | 1715  | 1.77  | 0.83  | 1.1E-03 | 1.61  | 0.69  | 7.8E-03 |
| Rin1     | 390   | 1.88  | 0.91  | 4.5E-13 | 1.64  | 0.71  | 2.2E-08 |
| Rin2     | 2072  | -1.58 | -0.66 | 1.1E-09 | -1.61 | -0.69 | 2.6E-10 |
| Rin3     | 463   | -2.83 | -1.50 | 2.1E-13 | -3.14 | -1.65 | 5.9E-16 |
| Ring1    | 2355  | -1.90 | -0.93 | 2.7E-07 | -2.18 | -1.13 | 2.9E-10 |
| Riok2    | 4907  | 1.42  | 0.51  | 2.7E-08 | 1.41  | 0.50  | 6.6E-08 |
| Riox1    | 1052  | 1.28  | 0.36  | 1.9E-04 | 1.26  | 0.33  | 6.8E-04 |
| Ripk1    | 1087  | -2.06 | -1.04 | 5.7E-34 | -1.98 | -0.99 | 2.6E-30 |
| Ripk2    | 1145  | 2.81  | 1.49  | 2.9E-85 | 2.85  | 1.51  | 6.4E-87 |
| Ripk3    | 526   | 1.96  | 0.97  | 1.5E-02 | 1.91  | 0.93  | 2.0E-02 |
| Ripor1   | 3295  | 1.36  | 0.44  | 2.1E-03 | 1.29  | 0.36  | 1.3E-02 |
| Ripor3   | 171   | -3.13 | -1.65 | 1.0E-05 | -3.43 | -1.78 | 1.9E-06 |
| Rit1     | 2411  | 1.63  | 0.71  | 3.8E-30 | 1.60  | 0.68  | 4.9E-28 |
| Rita1    | 1249  | 2.58  | 1.37  | 9.1E-42 | 2.63  | 1.40  | 2.3E-43 |
| Rmc1     | 2865  | 2.07  | 1.05  | 2.3E-31 | 2.20  | 1.14  | 1.7E-36 |
| Rmdn1    | 682   | -1.34 | -0.42 | 3.3E-04 | -1.23 | -0.30 | 1.4E-02 |
| Rmdn2    | 218   | -6.36 | -2.67 | 3.3E-77 | -7.53 | -2.91 | 1.8E-87 |
| Rmdn3    | 2672  | 1.32  | 0.40  | 1.4E-11 | 1.27  | 0.35  | 4.4E-09 |
| Rmi1     | 1833  | -1.41 | -0.49 | 5.7E-15 | -1.48 | -0.57 | 1.4E-19 |
| Rmnd5a   | 10131 | 1.53  | 0.61  | 3.3E-27 | 1.52  | 0.61  | 6.3E-27 |
| Rmnd5b   | 2194  | 1.35  | 0.44  | 3.1E-10 | 1.32  | 0.40  | 7.3E-09 |
| Rnaseh2a | 2685  | 1.85  | 0.89  | 1.7E-11 | 1.67  | 0.74  | 2.4E-08 |
| Rnaseh2b | 1694  | -1.96 | -0.97 | 9.3E-12 | -2.03 | -1.02 | 6.7E-13 |
| Rnaseh2c | 2154  | 1.38  | 0.46  | 4.4E-03 | 1.28  | 0.35  | 3.6E-02 |
| Rnasel   | 5478  | -2.82 | -1.49 | 3.1E-27 | -2.68 | -1.42 | 8.1E-25 |
| Rnd1     | 1048  | 3.11  | 1.64  | 8.5E-31 | 2.84  | 1.51  | 3.3E-26 |
| Rnd3     | 17191 | -1.47 | -0.56 | 1.3E-07 | -1.44 | -0.53 | 6.9E-07 |
| Rnf10    | 22283 | 1.25  | 0.33  | 3.4E-04 | 1.18  | 0.24  | 1.2E-02 |
| Rnf113a2 | 1062  | 1.33  | 0.41  | 7.3E-06 | 1.27  | 0.35  | 1.5E-04 |
| Rnf115   | 5353  | 1.41  | 0.50  | 2.7E-10 | 1.35  | 0.43  | 5.9E-08 |
| Rnf122   | 3323  | -1.22 | -0.29 | 5.8E-05 | -1.32 | -0.40 | 1.3E-08 |

|          |       |       |       |         |       |       |         |
|----------|-------|-------|-------|---------|-------|-------|---------|
| Rnf128   | 202   | 1.59  | 0.67  | 1.6E-02 | 1.64  | 0.72  | 1.0E-02 |
| Rnf13    | 3567  | 1.32  | 0.40  | 6.4E-06 | 1.40  | 0.49  | 4.1E-08 |
| Rnf135   | 168   | -1.99 | -0.99 | 4.9E-08 | -1.97 | -0.98 | 8.1E-08 |
| Rnf144a  | 5958  | -1.52 | -0.61 | 2.1E-15 | -1.55 | -0.63 | 1.3E-16 |
| Rnf150   | 2619  | -1.92 | -0.94 | 5.1E-17 | -1.74 | -0.80 | 2.1E-12 |
| Rnf166   | 1825  | 1.38  | 0.46  | 6.3E-11 | 1.33  | 0.41  | 1.1E-08 |
| Rnf169   | 3609  | -1.24 | -0.31 | 1.5E-04 | -1.25 | -0.33 | 7.5E-05 |
| Rnf180   | 865   | -2.14 | -1.10 | 3.9E-12 | -1.97 | -0.98 | 8.3E-10 |
| Rnf182   | 2274  | 1.38  | 0.46  | 5.8E-03 | 1.36  | 0.45  | 8.1E-03 |
| Rnf185   | 4524  | 1.62  | 0.70  | 4.4E-25 | 1.57  | 0.65  | 8.8E-22 |
| Rnf187   | 17783 | 1.31  | 0.39  | 1.1E-06 | 1.25  | 0.32  | 1.0E-04 |
| Rnf19b   | 2770  | 1.38  | 0.47  | 7.2E-05 | 1.32  | 0.40  | 7.2E-04 |
| Rnf207   | 148   | -1.31 | -0.39 | 2.2E-02 | -1.29 | -0.36 | 3.5E-02 |
| Rnf215   | 2115  | -1.50 | -0.58 | 8.3E-12 | -1.54 | -0.62 | 3.1E-13 |
| Rnf217   | 1654  | -1.53 | -0.61 | 2.5E-04 | -1.37 | -0.45 | 7.7E-03 |
| Rnf223   | 282   | 2.78  | 1.47  | 8.3E-22 | 2.61  | 1.39  | 1.8E-19 |
| Rnf225   | 192   | 1.74  | 0.80  | 3.5E-10 | 1.60  | 0.68  | 1.7E-07 |
| Rnf227   | 4542  | 1.44  | 0.53  | 1.4E-02 | 1.54  | 0.62  | 3.2E-03 |
| Rnf31    | 2259  | 1.26  | 0.33  | 1.1E-03 | 1.25  | 0.32  | 1.7E-03 |
| Rnf34    | 4614  | 1.49  | 0.57  | 1.2E-13 | 1.50  | 0.59  | 3.6E-14 |
| Rnft1    | 1790  | 1.25  | 0.32  | 3.5E-03 | 1.27  | 0.35  | 1.6E-03 |
| Rngtt    | 5063  | 1.79  | 0.84  | 2.0E-29 | 1.87  | 0.90  | 5.4E-34 |
| Rnh1     | 2002  | -1.90 | -0.92 | 2.6E-12 | -1.98 | -0.98 | 7.1E-14 |
| Rnmt     | 8419  | 1.40  | 0.49  | 7.8E-10 | 1.47  | 0.55  | 2.0E-12 |
| Rnpc3    | 2700  | -1.59 | -0.67 | 3.2E-09 | -1.37 | -0.45 | 8.4E-05 |
| Rnpep    | 3605  | -1.32 | -0.40 | 4.7E-09 | -1.42 | -0.50 | 1.5E-13 |
| Rnpepl1  | 2631  | -1.26 | -0.34 | 3.0E-03 | -1.36 | -0.44 | 7.3E-05 |
| Ro60     | 20892 | 1.83  | 0.87  | 5.0E-11 | 2.10  | 1.07  | 2.7E-16 |
| Robo4    | 695   | -2.11 | -1.08 | 1.5E-17 | -2.21 | -1.15 | 1.1E-19 |
| Rogdi    | 2534  | 1.34  | 0.43  | 1.7E-08 | 1.29  | 0.37  | 1.2E-06 |
| Rom1     | 105   | -1.71 | -0.78 | 2.4E-06 | -1.67 | -0.74 | 8.5E-06 |
| Ror2     | 1379  | -1.42 | -0.51 | 2.0E-02 | -1.60 | -0.68 | 1.5E-03 |
| Rorc     | 321   | 2.31  | 1.21  | 2.2E-08 | 2.39  | 1.25  | 6.1E-09 |
| Rp2      | 3024  | 1.59  | 0.67  | 2.8E-12 | 1.56  | 0.64  | 1.5E-11 |
| Rpa1     | 12109 | 1.92  | 0.94  | 3.3E-17 | 1.78  | 0.83  | 1.4E-13 |
| Rpa2     | 4235  | 1.53  | 0.61  | 7.9E-05 | 1.34  | 0.42  | 8.6E-03 |
| Rpa3     | 2669  | 1.30  | 0.38  | 4.2E-03 | 1.26  | 0.33  | 1.5E-02 |
| Rpain    | 1629  | 1.37  | 0.45  | 5.6E-09 | 1.33  | 0.41  | 1.7E-07 |
| Rpap1    | 2974  | -1.93 | -0.95 | 1.2E-16 | -2.07 | -1.05 | 2.7E-20 |
| Rpap2    | 1284  | -1.25 | -0.32 | 1.2E-04 | -1.26 | -0.33 | 8.5E-05 |
| Rpf1     | 2309  | -1.45 | -0.54 | 1.5E-07 | -1.50 | -0.59 | 6.7E-09 |
| Rpgrip1l | 3644  | 1.47  | 0.55  | 2.0E-05 | 1.68  | 0.75  | 4.8E-09 |
| Rpn1     | 12140 | 1.23  | 0.29  | 1.3E-03 | 1.27  | 0.34  | 1.8E-04 |
| Rpp21    | 529   | -1.64 | -0.71 | 8.3E-18 | -1.79 | -0.84 | 1.0E-23 |
| Rpp38    | 340   | -1.69 | -0.76 | 2.7E-10 | -1.70 | -0.77 | 1.9E-10 |
| Rpp40    | 867   | 2.05  | 1.03  | 7.0E-15 | 1.95  | 0.96  | 4.4E-13 |
| Rprd1a   | 7927  | 1.50  | 0.58  | 1.9E-17 | 1.51  | 0.60  | 2.9E-18 |

|          |       |       |       |          |       |       |          |
|----------|-------|-------|-------|----------|-------|-------|----------|
| Rprd2    | 4254  | -2.07 | -1.05 | 4.0E-20  | -2.15 | -1.11 | 3.3E-22  |
| Rprm     | 2788  | -1.47 | -0.56 | 7.8E-04  | -1.37 | -0.45 | 7.6E-03  |
| Rps19bp1 | 1322  | 1.25  | 0.32  | 4.3E-05  | 1.19  | 0.25  | 1.3E-03  |
| Rps6ka1  | 2855  | 2.84  | 1.51  | 4.1E-37  | 2.60  | 1.38  | 3.2E-31  |
| Rps6ka2  | 5307  | 1.80  | 0.85  | 8.1E-20  | 1.80  | 0.85  | 8.6E-20  |
| Rps6ka3  | 11427 | 1.21  | 0.27  | 3.3E-03  | 1.29  | 0.37  | 3.3E-05  |
| Rps6ka5  | 2355  | 1.53  | 0.61  | 4.5E-05  | 1.63  | 0.71  | 2.1E-06  |
| Rpusd3   | 444   | -1.21 | -0.28 | 3.8E-02  | -1.46 | -0.54 | 2.2E-05  |
| Rragb    | 2829  | 1.56  | 0.64  | 9.6E-10  | 1.54  | 0.62  | 3.0E-09  |
| Rras     | 533   | 1.63  | 0.71  | 3.5E-05  | 1.45  | 0.53  | 2.3E-03  |
| Rras2    | 3016  | 1.79  | 0.84  | 3.7E-27  | 1.76  | 0.82  | 5.1E-26  |
| Rrm2     | 12342 | -1.61 | -0.69 | 4.7E-03  | -1.96 | -0.97 | 4.6E-05  |
| Rrm2b    | 1684  | 1.51  | 0.59  | 2.6E-25  | 1.51  | 0.59  | 1.9E-25  |
| Rrp1     | 15728 | 1.30  | 0.38  | 8.1E-08  | 1.21  | 0.27  | 1.4E-04  |
| Rrp12    | 3528  | 1.64  | 0.71  | 2.0E-12  | 1.54  | 0.63  | 7.9E-10  |
| Rrp9     | 2358  | 2.03  | 1.02  | 2.3E-16  | 1.79  | 0.84  | 1.9E-11  |
| Rsb1n1   | 8220  | 1.21  | 0.28  | 8.6E-03  | 1.30  | 0.38  | 2.0E-04  |
| Rsf1     | 8543  | -1.42 | -0.50 | 1.3E-06  | -1.27 | -0.34 | 1.2E-03  |
| Rskr     | 107   | 2.22  | 1.15  | 2.3E-17  | 2.39  | 1.26  | 3.6E-20  |
| Rsph1    | 173   | 1.43  | 0.52  | 3.7E-03  | 1.53  | 0.61  | 5.0E-04  |
| Rsph10b  | 544   | 2.03  | 1.02  | 8.3E-08  | 2.64  | 1.40  | 9.2E-14  |
| Rsph3b   | 721   | 1.26  | 0.33  | 4.2E-07  | 1.12  | 0.17  | 1.5E-02  |
| Rsph4a   | 231   | 1.58  | 0.66  | 1.1E-02  | 1.80  | 0.85  | 1.0E-03  |
| Rsph9    | 558   | 1.40  | 0.49  | 1.0E-05  | 1.50  | 0.58  | 9.6E-08  |
| Rspo2    | 1294  | -1.65 | -0.72 | 3.4E-03  | -2.12 | -1.09 | 6.2E-06  |
| Rspo3    | 1820  | -1.64 | -0.71 | 1.5E-04  | -2.02 | -1.01 | 4.5E-08  |
| Rsrc2    | 12072 | -1.68 | -0.75 | 9.5E-24  | -1.62 | -0.70 | 8.0E-21  |
| Rtbdn    | 164   | 1.76  | 0.81  | 1.6E-03  | 1.86  | 0.90  | 4.9E-04  |
| Rtca     | 4003  | 1.31  | 0.39  | 4.8E-07  | 1.24  | 0.31  | 9.7E-05  |
| Rtel1    | 4172  | -1.34 | -0.43 | 2.1E-07  | -1.39 | -0.48 | 7.2E-09  |
| Rtf1     | 12843 | 1.35  | 0.44  | 8.2E-13  | 1.27  | 0.34  | 2.3E-08  |
| Rtf2     | 5214  | 1.28  | 0.36  | 1.0E-06  | 1.20  | 0.26  | 5.6E-04  |
| Rtkn     | 1660  | -2.02 | -1.01 | 1.7E-08  | -2.06 | -1.04 | 5.7E-09  |
| Rtl3     | 706   | -5.16 | -2.37 | 8.6E-06  | -4.48 | -2.16 | 5.5E-05  |
| Rtl6     | 4845  | -1.49 | -0.57 | 1.3E-05  | -1.58 | -0.66 | 4.2E-07  |
| Rtn4     | 30259 | -1.65 | -0.73 | 1.7E-12  | -1.73 | -0.79 | 1.0E-14  |
| Rtn4rl2  | 469   | 2.04  | 1.03  | 4.0E-09  | 2.01  | 1.01  | 7.6E-09  |
| Rtraf    | 11323 | 1.29  | 0.36  | 1.3E-04  | 1.30  | 0.37  | 7.9E-05  |
| Rubcn    | 5545  | 1.54  | 0.62  | 2.6E-12  | 1.56  | 0.64  | 5.0E-13  |
| Rufy1    | 1883  | -1.35 | -0.43 | 2.1E-09  | -1.32 | -0.40 | 1.8E-08  |
| Rundc1   | 2598  | 1.54  | 0.62  | 2.8E-22  | 1.46  | 0.55  | 2.5E-17  |
| Runx1    | 381   | -3.19 | -1.67 | 1.6E-04  | -2.98 | -1.57 | 4.3E-04  |
| Runx1t1  | 7184  | -1.62 | -0.70 | 4.1E-03  | -1.61 | -0.69 | 4.8E-03  |
| Runx2    | 782   | -3.89 | -1.96 | 1.5E-05  | -3.99 | -2.00 | 1.1E-05  |
| Rusc2    | 5884  | -1.98 | -0.99 | 4.9E-05  | -2.11 | -1.08 | 8.5E-06  |
| Rwdd2a   | 435   | 7.14  | 2.84  | 3.5E-147 | 6.82  | 2.77  | 5.2E-143 |
| Rwdd2b   | 467   | -3.44 | -1.78 | 7.3E-118 | -3.69 | -1.89 | 2.2E-128 |

|         |       |       |       |         |       |       |         |
|---------|-------|-------|-------|---------|-------|-------|---------|
| Rwdd3   | 521   | -1.40 | -0.48 | 5.4E-03 | -1.33 | -0.41 | 2.0E-02 |
| Rwdd4a  | 5137  | 1.92  | 0.94  | 5.5E-29 | 1.87  | 0.90  | 6.3E-27 |
| Rxfp3   | 166   | -3.05 | -1.61 | 1.0E-10 | -3.54 | -1.82 | 3.1E-13 |
| Rxrb    | 4358  | -1.27 | -0.35 | 5.6E-06 | -1.34 | -0.42 | 3.0E-08 |
| Rxylt1  | 2032  | 1.49  | 0.57  | 1.7E-13 | 1.51  | 0.59  | 2.6E-14 |
| S100a10 | 2920  | -1.48 | -0.57 | 2.5E-02 | -1.49 | -0.57 | 2.4E-02 |
| S100a13 | 157   | -1.30 | -0.38 | 2.4E-02 | -1.27 | -0.34 | 4.5E-02 |
| S100a16 | 596   | -2.17 | -1.12 | 3.0E-18 | -2.26 | -1.18 | 4.2E-20 |
| S100a6  | 439   | -1.29 | -0.37 | 6.2E-03 | -1.27 | -0.34 | 1.3E-02 |
| S1pr1   | 1963  | -1.25 | -0.32 | 2.4E-06 | -1.38 | -0.46 | 4.0E-12 |
| Sacm1   | 7648  | 1.55  | 0.64  | 7.9E-19 | 1.63  | 0.71  | 6.1E-23 |
| Safb    | 14014 | -1.45 | -0.53 | 1.4E-04 | -1.58 | -0.66 | 2.2E-06 |
| Sag     | 181   | 4.19  | 2.07  | 6.6E-33 | 4.68  | 2.23  | 8.3E-37 |
| Sall1   | 4174  | -1.84 | -0.88 | 1.4E-04 | -1.84 | -0.88 | 1.5E-04 |
| Sall2   | 8927  | -1.72 | -0.78 | 1.6E-12 | -1.92 | -0.94 | 1.6E-17 |
| Sall3   | 1797  | -1.48 | -0.56 | 4.1E-03 | -1.77 | -0.82 | 1.8E-05 |
| Sall4   | 546   | 2.37  | 1.24  | 8.3E-04 | 1.83  | 0.87  | 2.4E-02 |
| Samd1   | 2620  | -1.40 | -0.49 | 5.6E-05 | -1.55 | -0.63 | 1.5E-07 |
| Samd10  | 2579  | -2.14 | -1.09 | 1.5E-10 | -2.11 | -1.07 | 3.6E-10 |
| Samd11  | 170   | -1.90 | -0.92 | 1.4E-04 | -2.03 | -1.02 | 2.3E-05 |
| Samd14  | 10591 | -1.54 | -0.63 | 9.7E-05 | -1.59 | -0.67 | 2.8E-05 |
| Samd3   | 400   | -2.38 | -1.25 | 2.3E-04 | -2.84 | -1.51 | 7.6E-06 |
| Samd4b  | 6947  | 1.45  | 0.54  | 2.9E-06 | 1.35  | 0.43  | 2.5E-04 |
| Samd5   | 2239  | -1.88 | -0.91 | 1.7E-20 | -1.94 | -0.95 | 3.0E-22 |
| Samd8   | 6348  | 1.73  | 0.79  | 2.1E-14 | 1.70  | 0.77  | 1.4E-13 |
| Samd9l  | 228   | -1.98 | -0.98 | 3.5E-05 | -1.94 | -0.96 | 5.7E-05 |
| Samhd1  | 5052  | 1.53  | 0.61  | 2.2E-09 | 1.48  | 0.56  | 5.2E-08 |
| Samm50  | 4748  | -1.45 | -0.54 | 4.5E-12 | -1.56 | -0.64 | 8.3E-17 |
| Sap130  | 6963  | 1.36  | 0.45  | 2.1E-13 | 1.30  | 0.38  | 4.4E-10 |
| Sap30l  | 1292  | 1.46  | 0.55  | 3.0E-15 | 1.46  | 0.55  | 3.7E-15 |
| Saraf   | 8581  | 1.68  | 0.75  | 2.4E-20 | 1.72  | 0.78  | 1.1E-21 |
| Sardh   | 489   | -1.91 | -0.94 | 3.8E-05 | -1.93 | -0.95 | 3.0E-05 |
| Sars2   | 811   | -2.53 | -1.34 | 4.7E-23 | -2.64 | -1.40 | 4.4E-25 |
| Sat1    | 2244  | 1.28  | 0.35  | 7.5E-05 | 1.32  | 0.40  | 4.6E-06 |
| Sat2    | 685   | 1.40  | 0.49  | 1.2E-10 | 1.41  | 0.50  | 6.7E-11 |
| Saxo2   | 296   | 1.31  | 0.39  | 3.0E-02 | 1.43  | 0.51  | 3.7E-03 |
| Saysd1  | 366   | -1.58 | -0.66 | 2.3E-10 | -1.66 | -0.73 | 3.3E-12 |
| Sbf1    | 12325 | 1.57  | 0.65  | 4.1E-08 | 1.53  | 0.61  | 2.8E-07 |
| Sbk3    | 118   | 2.93  | 1.55  | 6.2E-06 | 3.13  | 1.65  | 1.7E-06 |
| Sbno2   | 1513  | -2.10 | -1.07 | 3.2E-24 | -2.26 | -1.18 | 5.3E-29 |
| Sc5d    | 7412  | 1.66  | 0.73  | 7.1E-30 | 1.66  | 0.73  | 1.9E-29 |
| Scaf4   | 5878  | 1.30  | 0.38  | 4.1E-04 | 1.26  | 0.34  | 1.8E-03 |
| Scaf8   | 5748  | -1.42 | -0.50 | 3.3E-15 | -1.43 | -0.52 | 6.4E-16 |
| Scamp1  | 8509  | 1.28  | 0.36  | 7.8E-03 | 1.32  | 0.40  | 3.2E-03 |
| Scamp2  | 2628  | -1.36 | -0.44 | 3.0E-19 | -1.42 | -0.51 | 8.1E-25 |
| Scand1  | 1287  | -1.28 | -0.35 | 7.5E-03 | -1.37 | -0.46 | 4.2E-04 |
| Scaper  | 3960  | -1.65 | -0.73 | 4.3E-05 | -1.49 | -0.58 | 1.4E-03 |

|          |       |       |       |         |       |       |         |
|----------|-------|-------|-------|---------|-------|-------|---------|
| Scara3   | 922   | -3.02 | -1.59 | 6.1E-15 | -3.17 | -1.67 | 3.5E-16 |
| Scara5   | 424   | -2.38 | -1.25 | 1.9E-03 | -2.80 | -1.49 | 1.9E-04 |
| Scarb1   | 3129  | 2.56  | 1.35  | 9.4E-38 | 2.28  | 1.19  | 1.7E-29 |
| Scarf1   | 312   | -1.34 | -0.42 | 6.7E-04 | -1.51 | -0.59 | 1.2E-06 |
| Scarf2   | 1480  | -2.40 | -1.27 | 2.7E-04 | -2.52 | -1.33 | 1.3E-04 |
| Scd1     | 3523  | 2.10  | 1.07  | 6.7E-06 | 1.71  | 0.78  | 1.4E-03 |
| Scfd1    | 2748  | -2.26 | -1.18 | 1.7E-33 | -2.12 | -1.08 | 1.7E-28 |
| Scft1    | 3048  | 1.26  | 0.34  | 2.5E-05 | 1.38  | 0.47  | 3.0E-09 |
| Scly     | 1245  | 2.26  | 1.18  | 2.9E-34 | 2.15  | 1.11  | 2.4E-30 |
| Scml2    | 716   | -1.94 | -0.95 | 1.6E-23 | -1.85 | -0.89 | 2.1E-20 |
| Scn2b    | 833   | -1.36 | -0.45 | 1.1E-02 | -1.36 | -0.45 | 1.2E-02 |
| Scn3a    | 8413  | -2.01 | -1.00 | 1.6E-05 | -1.68 | -0.74 | 1.8E-03 |
| Scn5a    | 1085  | 2.19  | 1.13  | 4.6E-11 | 2.23  | 1.16  | 2.0E-11 |
| Scnm1    | 2425  | -1.35 | -0.44 | 1.7E-06 | -1.34 | -0.43 | 3.0E-06 |
| Scpep1   | 3033  | 1.39  | 0.47  | 3.5E-04 | 1.28  | 0.36  | 7.9E-03 |
| Scrn2    | 719   | -1.60 | -0.68 | 2.3E-05 | -1.71 | -0.78 | 1.1E-06 |
| Scrn3    | 647   | -1.99 | -0.99 | 9.8E-26 | -1.97 | -0.98 | 7.4E-25 |
| Scrt1    | 3996  | -2.00 | -1.00 | 7.3E-05 | -2.10 | -1.07 | 2.0E-05 |
| Scrt2    | 3779  | -2.79 | -1.48 | 1.5E-11 | -2.73 | -1.45 | 4.5E-11 |
| Scube1   | 4902  | 1.46  | 0.54  | 5.4E-05 | 1.50  | 0.59  | 1.4E-05 |
| Scube3   | 5734  | -1.48 | -0.57 | 1.9E-03 | -1.65 | -0.73 | 5.0E-05 |
| Scx      | 108   | -4.53 | -2.18 | 5.3E-08 | -3.56 | -1.83 | 6.1E-06 |
| Scyl2    | 7981  | 1.35  | 0.43  | 1.4E-11 | 1.42  | 0.51  | 1.4E-15 |
| Sdc3     | 11979 | -1.49 | -0.57 | 3.1E-03 | -1.52 | -0.61 | 1.7E-03 |
| Sdcbp    | 16088 | 1.53  | 0.62  | 2.3E-09 | 1.63  | 0.71  | 5.2E-12 |
| Sdccag8  | 1430  | 1.51  | 0.59  | 2.7E-29 | 1.62  | 0.70  | 1.0E-39 |
| Sdf2     | 2595  | -1.29 | -0.36 | 2.6E-06 | -1.29 | -0.37 | 1.8E-06 |
| Sdf2l1   | 1277  | 1.98  | 0.99  | 4.4E-11 | 1.79  | 0.84  | 2.5E-08 |
| Sdf4     | 6880  | -1.33 | -0.42 | 5.4E-17 | -1.40 | -0.49 | 1.1E-22 |
| Sdr39u1  | 1162  | -1.45 | -0.54 | 3.7E-04 | -1.52 | -0.60 | 5.5E-05 |
| Sdsl     | 200   | -1.28 | -0.35 | 1.7E-02 | -1.38 | -0.46 | 1.4E-03 |
| Sec11c   | 2003  | 1.91  | 0.94  | 2.0E-26 | 1.98  | 0.99  | 3.6E-29 |
| Sec14l1  | 12601 | 1.83  | 0.88  | 2.7E-20 | 1.74  | 0.80  | 3.4E-17 |
| Sec14l2  | 403   | 1.32  | 0.40  | 4.4E-04 | 1.28  | 0.35  | 2.4E-03 |
| Sec14l5  | 793   | 4.60  | 2.20  | 3.8E-27 | 5.41  | 2.44  | 8.2E-33 |
| Sec16a   | 12641 | 1.29  | 0.37  | 8.7E-05 | 1.36  | 0.45  | 1.5E-06 |
| Sec22c   | 4964  | 1.33  | 0.41  | 7.3E-04 | 1.22  | 0.29  | 2.1E-02 |
| Sec23a   | 12547 | 1.24  | 0.32  | 3.1E-05 | 1.32  | 0.40  | 8.5E-08 |
| Sec23b   | 6991  | 1.46  | 0.55  | 9.7E-08 | 1.42  | 0.50  | 1.4E-06 |
| Sec24a   | 3464  | 1.29  | 0.37  | 1.1E-04 | 1.30  | 0.38  | 8.0E-05 |
| Sec62    | 9104  | -1.25 | -0.32 | 8.2E-08 | -1.23 | -0.29 | 1.3E-06 |
| Secisbp2 | 1609  | -2.31 | -1.21 | 4.5E-48 | -2.49 | -1.31 | 9.0E-57 |
| Seh1l    | 5055  | -2.36 | -1.24 | 1.3E-47 | -2.38 | -1.25 | 2.6E-48 |
| Sel1l    | 12129 | 1.28  | 0.35  | 7.3E-06 | 1.33  | 0.41  | 1.1E-07 |
| Sel1l3   | 1613  | -1.51 | -0.59 | 9.2E-04 | -1.46 | -0.55 | 2.4E-03 |
| Selenoi  | 7031  | 1.21  | 0.27  | 1.6E-03 | 1.28  | 0.36  | 1.9E-05 |
| Selenon  | 4954  | -1.90 | -0.93 | 5.5E-17 | -1.98 | -0.99 | 4.4E-19 |

|           |       |       |       |         |       |       |         |
|-----------|-------|-------|-------|---------|-------|-------|---------|
| Sema3a    | 2749  | -2.24 | -1.16 | 2.5E-07 | -1.77 | -0.82 | 3.5E-04 |
| Sema3b    | 220   | -1.51 | -0.59 | 6.9E-03 | -1.53 | -0.61 | 5.5E-03 |
| Sema3c    | 3350  | -1.87 | -0.90 | 5.6E-07 | -1.80 | -0.85 | 2.9E-06 |
| Sema3d    | 891   | -2.64 | -1.40 | 2.0E-03 | -1.91 | -0.93 | 4.7E-02 |
| Sema3g    | 601   | -1.64 | -0.71 | 2.1E-08 | -1.75 | -0.81 | 1.6E-10 |
| Sema4a    | 1676  | -1.54 | -0.63 | 2.2E-03 | -1.61 | -0.68 | 7.7E-04 |
| Sema4c    | 4933  | -1.84 | -0.88 | 7.6E-13 | -2.10 | -1.07 | 1.5E-18 |
| Sema4d    | 1612  | 1.90  | 0.93  | 4.8E-10 | 1.86  | 0.89  | 2.1E-09 |
| Sema6a    | 5687  | -1.29 | -0.37 | 1.6E-03 | -1.37 | -0.45 | 7.8E-05 |
| Sema6b    | 2249  | 1.88  | 0.91  | 4.5E-06 | 1.85  | 0.89  | 8.3E-06 |
| Sema6d    | 5702  | -1.66 | -0.73 | 6.7E-04 | -1.42 | -0.51 | 2.2E-02 |
| Senp2     | 8528  | 1.53  | 0.62  | 3.2E-24 | 1.48  | 0.57  | 1.3E-20 |
| Senp3     | 8408  | 1.29  | 0.36  | 1.2E-19 | 1.24  | 0.31  | 2.0E-14 |
| Senp6     | 10112 | -2.39 | -1.25 | 8.2E-61 | -2.35 | -1.23 | 1.4E-58 |
| Sephs1    | 9449  | -2.11 | -1.07 | 6.2E-31 | -2.22 | -1.15 | 1.7E-35 |
| Sephs2    | 3275  | 1.62  | 0.70  | 1.4E-10 | 1.41  | 0.50  | 6.9E-06 |
| Sepsecs   | 2467  | 1.31  | 0.39  | 3.5E-07 | 1.37  | 0.45  | 4.7E-09 |
| Septin1   | 808   | -1.45 | -0.54 | 1.8E-03 | -1.80 | -0.85 | 4.1E-07 |
| Septin4   | 792   | 2.13  | 1.09  | 2.3E-16 | 2.27  | 1.18  | 4.4E-19 |
| Septin7   | 20284 | -1.31 | -0.39 | 1.6E-05 | -1.27 | -0.35 | 1.2E-04 |
| Septin9   | 12761 | -1.25 | -0.32 | 6.5E-03 | -1.39 | -0.47 | 3.4E-05 |
| Serac1    | 2485  | 1.67  | 0.74  | 5.5E-11 | 1.88  | 0.91  | 4.7E-16 |
| Sergef    | 851   | 1.27  | 0.34  | 4.5E-03 | 1.27  | 0.34  | 5.3E-03 |
| Serinc2   | 2587  | -2.01 | -1.00 | 1.0E-31 | -2.10 | -1.07 | 7.5E-36 |
| Serinc4   | 116   | -4.90 | -2.29 | 1.0E-28 | -4.52 | -2.18 | 4.8E-26 |
| Serinc5   | 5207  | 1.90  | 0.92  | 2.9E-13 | 2.12  | 1.09  | 5.8E-18 |
| Serp1     | 12830 | 1.26  | 0.34  | 2.6E-03 | 1.23  | 0.30  | 8.4E-03 |
| Serpinb6a | 2101  | -1.30 | -0.38 | 2.4E-02 | -1.29 | -0.37 | 2.9E-02 |
| Serping1  | 1024  | -1.99 | -0.99 | 5.7E-12 | -1.97 | -0.98 | 1.1E-11 |
| Serpini1  | 7446  | 1.35  | 0.43  | 4.5E-02 | 1.59  | 0.67  | 1.3E-03 |
| Sertad2   | 4072  | 1.53  | 0.61  | 2.0E-13 | 1.50  | 0.58  | 3.5E-12 |
| Sertad3   | 847   | 2.13  | 1.09  | 4.1E-24 | 1.95  | 0.96  | 4.7E-19 |
| Sertad4   | 3346  | -1.91 | -0.94 | 3.2E-19 | -1.95 | -0.97 | 2.7E-20 |
| Sertm1    | 1096  | 2.09  | 1.06  | 3.0E-09 | 2.03  | 1.02  | 1.2E-08 |
| Sesn1     | 3981  | 1.42  | 0.51  | 3.3E-10 | 1.56  | 0.64  | 1.0E-15 |
| Sesn2     | 1972  | 4.48  | 2.16  | 3.7E-70 | 4.10  | 2.04  | 3.1E-62 |
| Sesn3     | 17785 | 1.60  | 0.67  | 4.1E-17 | 1.74  | 0.80  | 1.8E-23 |
| Sestd1    | 12808 | -1.41 | -0.50 | 6.4E-04 | -1.32 | -0.40 | 8.0E-03 |
| Set       | 42386 | -1.41 | -0.49 | 4.4E-04 | -1.59 | -0.66 | 1.3E-06 |
| Setbp1    | 9254  | -3.28 | -1.71 | 1.7E-29 | -3.22 | -1.69 | 1.2E-28 |
| Setd1b    | 4177  | -2.04 | -1.03 | 1.6E-07 | -2.28 | -1.19 | 1.1E-09 |
| Setd3     | 10303 | 1.43  | 0.52  | 7.9E-41 | 1.44  | 0.53  | 2.1E-42 |
| Setd4     | 686   | -1.85 | -0.88 | 1.3E-19 | -1.92 | -0.94 | 5.7E-22 |
| Setd7     | 4188  | -1.53 | -0.61 | 6.4E-14 | -1.52 | -0.61 | 8.9E-14 |
| Setdb2    | 1135  | 1.56  | 0.64  | 1.1E-07 | 1.63  | 0.71  | 5.2E-09 |
| Setmar    | 331   | -1.98 | -0.99 | 8.2E-17 | -1.87 | -0.90 | 2.4E-14 |
| Sf3a1     | 10723 | -1.39 | -0.47 | 4.3E-04 | -1.56 | -0.65 | 1.1E-06 |



|          |       |       |       |         |       |       |         |
|----------|-------|-------|-------|---------|-------|-------|---------|
| Sf3b5    | 1896  | 1.48  | 0.56  | 5.4E-06 | 1.33  | 0.41  | 1.4E-03 |
| Sf3b6    | 6240  | 1.30  | 0.38  | 7.3E-05 | 1.34  | 0.42  | 1.2E-05 |
| Sfi1     | 1449  | -1.52 | -0.60 | 2.5E-14 | -1.55 | -0.64 | 9.6E-16 |
| Sfmbt2   | 633   | 1.78  | 0.83  | 1.1E-08 | 1.94  | 0.95  | 5.7E-11 |
| Sfpq     | 47502 | -1.58 | -0.66 | 1.8E-16 | -1.58 | -0.66 | 4.7E-16 |
| Sfrp1    | 17728 | 1.45  | 0.54  | 1.1E-03 | 1.37  | 0.46  | 6.2E-03 |
| Sfrp2    | 4464  | -1.80 | -0.84 | 4.0E-03 | -1.75 | -0.81 | 6.1E-03 |
| Sfrp4    | 264   | 1.98  | 0.98  | 1.3E-20 | 1.84  | 0.88  | 2.2E-16 |
| Sft2d2   | 3066  | 1.57  | 0.65  | 2.1E-06 | 1.52  | 0.60  | 1.1E-05 |
| Sft2d3   | 601   | -1.35 | -0.43 | 9.2E-07 | -1.37 | -0.45 | 2.5E-07 |
| Sfxn2    | 3160  | 1.92  | 0.94  | 4.0E-29 | 1.78  | 0.83  | 3.2E-23 |
| Sgcb     | 2549  | 1.26  | 0.33  | 5.9E-04 | 1.29  | 0.36  | 1.4E-04 |
| Sgce     | 1951  | -1.87 | -0.90 | 4.6E-34 | -1.94 | -0.96 | 2.3E-38 |
| Sgf29    | 862   | -1.84 | -0.88 | 3.1E-24 | -2.00 | -1.00 | 8.2E-31 |
| Sgk3     | 621   | -1.99 | -0.99 | 8.3E-07 | -1.83 | -0.87 | 1.8E-05 |
| Sgo1     | 2634  | -1.48 | -0.56 | 1.5E-03 | -1.63 | -0.71 | 5.6E-05 |
| Sgpl1    | 11314 | 1.43  | 0.52  | 1.0E-14 | 1.41  | 0.50  | 8.3E-14 |
| Sgpp1    | 1571  | 1.51  | 0.60  | 6.5E-10 | 1.60  | 0.68  | 2.2E-12 |
| Sgpp2    | 329   | 2.17  | 1.12  | 5.5E-04 | 2.28  | 1.19  | 2.5E-04 |
| Sgsm1    | 2744  | 1.70  | 0.77  | 2.4E-10 | 1.60  | 0.68  | 2.9E-08 |
| Sgsm2    | 4474  | 1.40  | 0.49  | 2.7E-04 | 1.34  | 0.42  | 1.8E-03 |
| Sgsm3    | 2524  | 1.76  | 0.81  | 8.5E-29 | 1.69  | 0.75  | 8.3E-25 |
| Sgtb     | 5003  | 2.59  | 1.37  | 4.7E-61 | 2.73  | 1.45  | 1.2E-67 |
| Sh2b2    | 1643  | 1.33  | 0.41  | 1.7E-03 | 1.23  | 0.30  | 2.5E-02 |
| Sh2b3    | 2074  | 2.26  | 1.18  | 1.9E-20 | 2.06  | 1.04  | 3.6E-16 |
| Sh2d4b   | 1118  | 3.11  | 1.64  | 3.7E-16 | 3.31  | 1.73  | 7.1E-18 |
| Sh2d5    | 969   | 2.34  | 1.23  | 1.0E-12 | 2.58  | 1.37  | 1.7E-15 |
| Sh3bgr   | 135   | 1.74  | 0.80  | 1.1E-02 | 1.97  | 0.98  | 1.9E-03 |
| Sh3bgrl2 | 2180  | 2.48  | 1.31  | 5.2E-53 | 2.71  | 1.44  | 3.1E-63 |
| Sh3bp2   | 1827  | -1.93 | -0.95 | 2.7E-10 | -2.20 | -1.14 | 2.9E-14 |
| Sh3bp4   | 3448  | 1.62  | 0.69  | 6.8E-16 | 1.60  | 0.67  | 5.5E-15 |
| Sh3bp5   | 4917  | -1.96 | -0.97 | 6.8E-09 | -2.03 | -1.02 | 1.1E-09 |
| Sh3d19   | 1865  | -1.45 | -0.53 | 1.5E-03 | -1.45 | -0.54 | 1.4E-03 |
| Sh3glb2  | 5383  | 1.26  | 0.34  | 4.5E-03 | 1.29  | 0.36  | 2.1E-03 |
| Sh3pxd2a | 9733  | -1.41 | -0.50 | 5.9E-04 | -1.31 | -0.39 | 8.6E-03 |
| Sh3pxd2b | 8231  | -1.73 | -0.79 | 2.1E-11 | -1.78 | -0.83 | 1.2E-12 |
| Sh3tc1   | 266   | -1.45 | -0.54 | 3.6E-04 | -1.40 | -0.48 | 1.6E-03 |
| Sh3tc2   | 162   | -3.02 | -1.60 | 4.6E-11 | -2.85 | -1.51 | 6.3E-10 |
| Sh3yl1   | 1332  | 1.48  | 0.56  | 8.1E-07 | 1.47  | 0.56  | 9.6E-07 |
| Shank2   | 2071  | -2.21 | -1.14 | 1.8E-05 | -2.32 | -1.22 | 4.8E-06 |
| Shb      | 1757  | 1.71  | 0.77  | 1.6E-04 | 1.55  | 0.63  | 2.7E-03 |
| Shc2     | 2467  | -1.42 | -0.51 | 1.9E-05 | -1.41 | -0.50 | 3.2E-05 |
| Shc4     | 325   | -1.69 | -0.75 | 1.4E-05 | -1.50 | -0.58 | 1.0E-03 |
| Shd      | 2941  | -1.46 | -0.55 | 2.6E-06 | -1.48 | -0.56 | 1.3E-06 |
| She      | 492   | -1.98 | -0.99 | 5.0E-16 | -1.95 | -0.96 | 3.2E-15 |
| Shf      | 2446  | 1.58  | 0.66  | 2.1E-09 | 1.69  | 0.75  | 5.4E-12 |
| Shfl     | 184   | 1.90  | 0.93  | 1.8E-05 | 1.88  | 0.91  | 2.9E-05 |

|         |       |       |       |         |       |       |         |
|---------|-------|-------|-------|---------|-------|-------|---------|
| Shisa3  | 1066  | -2.55 | -1.35 | 1.7E-06 | -2.31 | -1.21 | 2.2E-05 |
| Shisa4  | 1825  | -1.22 | -0.28 | 1.0E-02 | -1.36 | -0.44 | 4.1E-05 |
| Shisa5  | 1429  | -1.39 | -0.47 | 4.7E-04 | -1.45 | -0.54 | 6.1E-05 |
| Shisa6  | 651   | -2.13 | -1.09 | 1.8E-04 | -1.85 | -0.89 | 2.7E-03 |
| Shisa1  | 2229  | -1.91 | -0.93 | 1.5E-05 | -1.94 | -0.96 | 9.5E-06 |
| Shkbp1  | 2965  | 1.27  | 0.35  | 2.7E-05 | 1.14  | 0.19  | 3.2E-02 |
| Shld1   | 402   | -2.93 | -1.55 | 1.7E-49 | -2.73 | -1.45 | 1.7E-43 |
| Shld2   | 510   | -1.72 | -0.78 | 2.4E-14 | -1.58 | -0.66 | 1.5E-10 |
| Shoc2   | 9766  | 1.27  | 0.35  | 7.7E-06 | 1.26  | 0.34  | 1.7E-05 |
| Shox2   | 3795  | -1.95 | -0.97 | 6.0E-05 | -2.26 | -1.17 | 8.6E-07 |
| Shpk    | 275   | 2.54  | 1.34  | 7.5E-22 | 2.51  | 1.33  | 3.7E-21 |
| Shprh   | 9281  | 1.24  | 0.31  | 1.6E-02 | 1.42  | 0.51  | 5.7E-05 |
| Shq1    | 1162  | 2.00  | 1.00  | 3.4E-36 | 1.92  | 0.94  | 4.7E-32 |
| Shroom1 | 169   | -1.89 | -0.92 | 9.7E-05 | -1.89 | -0.92 | 1.1E-04 |
| Shroom3 | 3100  | 1.77  | 0.82  | 3.0E-06 | 1.55  | 0.63  | 4.4E-04 |
| Shroom4 | 1948  | -1.34 | -0.42 | 3.7E-03 | -1.26 | -0.33 | 2.6E-02 |
| Siae    | 1336  | 1.34  | 0.42  | 4.0E-05 | 1.49  | 0.58  | 1.2E-08 |
| Siah1a  | 2537  | -1.65 | -0.72 | 2.6E-15 | -1.80 | -0.85 | 5.3E-21 |
| Siah1b  | 894   | -1.32 | -0.40 | 3.5E-02 | -1.49 | -0.57 | 1.9E-03 |
| Siah2   | 779   | 1.79  | 0.84  | 7.6E-24 | 1.77  | 0.82  | 8.8E-23 |
| Sidt2   | 5621  | 1.30  | 0.37  | 2.4E-05 | 1.26  | 0.34  | 1.6E-04 |
| Sigmar1 | 2518  | 1.53  | 0.62  | 8.3E-08 | 1.33  | 0.41  | 4.7E-04 |
| Sik1    | 2688  | 1.25  | 0.32  | 1.0E-02 | 1.26  | 0.33  | 8.0E-03 |
| Sik2    | 2420  | 1.63  | 0.70  | 7.3E-09 | 1.76  | 0.82  | 1.2E-11 |
| Sil1    | 709   | -1.39 | -0.48 | 2.8E-16 | -1.45 | -0.54 | 3.0E-20 |
| Sim2    | 224   | -2.06 | -1.04 | 9.2E-03 | -2.27 | -1.18 | 2.9E-03 |
| Sin3a   | 12950 | 1.69  | 0.76  | 3.1E-27 | 1.62  | 0.69  | 8.5E-23 |
| Sipa1l2 | 9580  | 1.61  | 0.69  | 4.0E-10 | 1.63  | 0.70  | 1.7E-10 |
| Sipa1l3 | 3720  | 1.80  | 0.85  | 1.7E-08 | 1.71  | 0.78  | 2.8E-07 |
| Sirpa   | 2545  | -1.49 | -0.58 | 1.1E-05 | -1.54 | -0.62 | 2.4E-06 |
| Sirt1   | 3366  | -1.49 | -0.57 | 5.2E-15 | -1.48 | -0.56 | 1.1E-14 |
| Sirt2   | 5935  | 1.39  | 0.47  | 1.3E-18 | 1.39  | 0.48  | 8.1E-19 |
| Sirt5   | 690   | -1.98 | -0.99 | 1.3E-31 | -1.75 | -0.81 | 1.9E-21 |
| Sirt6   | 2279  | -1.54 | -0.62 | 3.6E-06 | -1.74 | -0.80 | 2.3E-09 |
| Sirt7   | 2821  | 1.58  | 0.66  | 7.8E-19 | 1.48  | 0.56  | 8.0E-14 |
| Siva1   | 2373  | 1.54  | 0.62  | 5.6E-05 | 1.45  | 0.53  | 6.3E-04 |
| Six5    | 1478  | -1.83 | -0.87 | 1.2E-09 | -1.96 | -0.97 | 9.4E-12 |
| Ska1    | 908   | -1.47 | -0.56 | 2.3E-03 | -1.62 | -0.69 | 1.2E-04 |
| Ska2    | 6665  | -1.50 | -0.58 | 4.6E-07 | -1.59 | -0.67 | 6.7E-09 |
| Skap1   | 123   | 1.53  | 0.62  | 7.1E-05 | 1.35  | 0.43  | 6.5E-03 |
| Skida1  | 4816  | -1.33 | -0.41 | 2.1E-03 | -1.45 | -0.54 | 3.4E-05 |
| Sla     | 178   | -2.38 | -1.25 | 1.7E-03 | -2.74 | -1.46 | 2.3E-04 |
| Slbp    | 7176  | 1.36  | 0.44  | 7.3E-04 | 1.26  | 0.33  | 1.4E-02 |
| Slc10a4 | 450   | -1.75 | -0.80 | 5.3E-05 | -1.66 | -0.73 | 2.9E-04 |
| Slc11a2 | 3989  | 1.66  | 0.73  | 2.9E-36 | 1.68  | 0.75  | 2.9E-38 |
| Slc12a7 | 5929  | 1.32  | 0.40  | 1.4E-03 | 1.31  | 0.38  | 2.2E-03 |
| Slc12a9 | 2684  | 1.88  | 0.91  | 3.7E-15 | 1.80  | 0.85  | 2.8E-13 |

|          |      |       |       |         |       |       |         |
|----------|------|-------|-------|---------|-------|-------|---------|
| Slc13a5  | 110  | 2.16  | 1.11  | 1.6E-05 | 2.41  | 1.27  | 8.8E-07 |
| Slc14a2  | 114  | -1.82 | -0.86 | 7.2E-06 | -1.98 | -0.99 | 2.4E-07 |
| Slc15a4  | 1493 | 1.31  | 0.39  | 4.4E-07 | 1.31  | 0.39  | 3.5E-07 |
| Slc16a1  | 3029 | 1.53  | 0.62  | 5.4E-04 | 1.42  | 0.51  | 5.0E-03 |
| Slc16a12 | 204  | -2.76 | -1.46 | 6.9E-20 | -2.47 | -1.31 | 4.7E-16 |
| Slc16a14 | 680  | -2.34 | -1.23 | 5.2E-10 | -2.44 | -1.29 | 7.2E-11 |
| Slc16a3  | 1490 | 2.13  | 1.09  | 2.0E-06 | 1.98  | 0.98  | 2.1E-05 |
| Slc16a4  | 131  | -2.45 | -1.29 | 5.1E-05 | -2.02 | -1.01 | 1.9E-03 |
| Slc16a9  | 214  | -1.69 | -0.76 | 4.7E-03 | -2.02 | -1.02 | 1.2E-04 |
| Slc17a5  | 1374 | 1.28  | 0.35  | 4.6E-07 | 1.26  | 0.34  | 1.6E-06 |
| Slc17a6  | 5910 | -2.41 | -1.27 | 2.9E-09 | -2.42 | -1.28 | 2.4E-09 |
| Slc17a7  | 847  | 1.63  | 0.70  | 1.3E-02 | 1.63  | 0.70  | 1.4E-02 |
| Slc17a8  | 404  | -1.72 | -0.78 | 1.1E-03 | -1.43 | -0.52 | 3.8E-02 |
| Slc17a9  | 221  | 5.87  | 2.55  | 1.2E-33 | 6.74  | 2.75  | 2.1E-38 |
| Slc18b1  | 1524 | -1.48 | -0.57 | 1.6E-08 | -1.51 | -0.60 | 2.8E-09 |
| Slc19a2  | 1507 | 2.19  | 1.13  | 2.1E-40 | 2.18  | 1.12  | 7.3E-40 |
| Slc1a4   | 5038 | 1.38  | 0.46  | 1.1E-09 | 1.30  | 0.38  | 7.5E-07 |
| Slc1a5   | 3713 | 3.00  | 1.59  | 9.5E-23 | 2.70  | 1.43  | 1.1E-18 |
| Slc1a6   | 272  | 1.82  | 0.87  | 8.9E-07 | 1.71  | 0.77  | 1.4E-05 |
| Slc20a1  | 6973 | -1.82 | -0.86 | 2.4E-26 | -1.81 | -0.86 | 4.7E-26 |
| Slc20a2  | 1726 | -1.76 | -0.82 | 2.7E-20 | -1.86 | -0.90 | 3.2E-24 |
| Slc22a15 | 1103 | -2.14 | -1.10 | 3.7E-39 | -1.90 | -0.93 | 6.7E-28 |
| Slc22a21 | 450  | 2.16  | 1.11  | 2.7E-15 | 2.41  | 1.27  | 1.5E-19 |
| Slc22a5  | 1147 | 1.38  | 0.47  | 1.8E-09 | 1.41  | 0.49  | 2.8E-10 |
| Slc22a6  | 363  | -2.08 | -1.05 | 4.2E-03 | -2.10 | -1.07 | 3.8E-03 |
| Slc22a8  | 124  | -2.13 | -1.09 | 9.8E-03 | -2.17 | -1.12 | 8.2E-03 |
| Slc23a4  | 121  | 1.37  | 0.45  | 5.1E-03 | 1.60  | 0.68  | 1.9E-05 |
| Slc24a3  | 797  | -1.55 | -0.63 | 3.3E-02 | -1.63 | -0.70 | 1.7E-02 |
| Slc25a1  | 4306 | 1.73  | 0.79  | 6.5E-25 | 1.60  | 0.68  | 1.2E-18 |
| Slc25a10 | 2480 | 2.44  | 1.29  | 1.6E-30 | 2.21  | 1.14  | 2.8E-24 |
| Slc25a12 | 5108 | 1.38  | 0.47  | 2.3E-10 | 1.35  | 0.43  | 6.1E-09 |
| Slc25a14 | 1611 | 1.30  | 0.37  | 3.8E-05 | 1.32  | 0.40  | 8.4E-06 |
| Slc25a15 | 1643 | 1.65  | 0.73  | 7.3E-17 | 1.60  | 0.67  | 1.3E-14 |
| Slc25a16 | 1638 | 1.61  | 0.69  | 2.1E-19 | 1.46  | 0.55  | 9.3E-13 |
| Slc25a19 | 1683 | 1.46  | 0.55  | 8.6E-08 | 1.42  | 0.51  | 9.2E-07 |
| Slc25a20 | 2698 | 1.49  | 0.58  | 2.6E-21 | 1.47  | 0.56  | 5.5E-20 |
| Slc25a22 | 4225 | 1.38  | 0.47  | 5.5E-04 | 1.32  | 0.40  | 3.0E-03 |
| Slc25a23 | 9786 | 1.77  | 0.82  | 4.4E-16 | 1.69  | 0.76  | 9.4E-14 |
| Slc25a24 | 2430 | -2.04 | -1.03 | 1.5E-04 | -2.07 | -1.05 | 1.1E-04 |
| Slc25a25 | 3581 | 1.47  | 0.56  | 7.0E-08 | 1.42  | 0.50  | 1.2E-06 |
| Slc25a26 | 336  | -3.95 | -1.98 | 1.5E-63 | -4.30 | -2.10 | 3.8E-70 |
| Slc25a28 | 2490 | 1.58  | 0.66  | 4.9E-14 | 1.42  | 0.50  | 2.0E-08 |
| Slc25a29 | 727  | 2.28  | 1.19  | 1.4E-19 | 2.01  | 1.01  | 1.8E-14 |
| Slc25a30 | 2817 | 1.93  | 0.95  | 2.1E-46 | 1.91  | 0.93  | 9.3E-45 |
| Slc25a33 | 723  | 1.63  | 0.70  | 4.3E-27 | 1.73  | 0.79  | 5.4E-34 |
| Slc25a35 | 349  | 2.48  | 1.31  | 3.3E-12 | 2.72  | 1.44  | 1.6E-14 |
| Slc25a38 | 1131 | -1.32 | -0.41 | 2.9E-09 | -1.39 | -0.48 | 1.5E-12 |

|          |       |       |       |         |       |       |         |
|----------|-------|-------|-------|---------|-------|-------|---------|
| Slc25a39 | 4509  | 1.70  | 0.77  | 1.8E-14 | 1.57  | 0.65  | 9.8E-11 |
| Slc25a42 | 1225  | 2.10  | 1.07  | 9.8E-12 | 2.06  | 1.04  | 3.7E-11 |
| Slc25a44 | 3891  | 1.56  | 0.65  | 3.2E-27 | 1.51  | 0.60  | 2.9E-23 |
| Slc25a45 | 122   | -2.49 | -1.32 | 1.7E-10 | -3.14 | -1.65 | 1.0E-15 |
| Slc25a53 | 1330  | -1.35 | -0.43 | 1.4E-07 | -1.35 | -0.44 | 1.4E-07 |
| Slc26a10 | 171   | 1.95  | 0.96  | 1.7E-07 | 1.57  | 0.65  | 6.5E-04 |
| Slc26a11 | 802   | 1.81  | 0.86  | 2.3E-19 | 1.70  | 0.77  | 1.6E-15 |
| Slc26a2  | 2342  | 1.34  | 0.42  | 7.0E-03 | 1.52  | 0.61  | 6.4E-05 |
| Slc27a1  | 5126  | 1.47  | 0.56  | 2.5E-04 | 1.50  | 0.58  | 1.3E-04 |
| Slc27a2  | 336   | -1.71 | -0.78 | 1.4E-03 | -2.16 | -1.11 | 3.1E-06 |
| Slc27a3  | 1164  | -2.13 | -1.09 | 2.8E-17 | -2.06 | -1.04 | 6.6E-16 |
| Slc29a1  | 2220  | 1.90  | 0.93  | 7.2E-26 | 1.75  | 0.81  | 4.3E-20 |
| Slc29a3  | 1740  | -1.36 | -0.44 | 5.8E-12 | -1.33 | -0.41 | 2.7E-10 |
| Slc29a4  | 3649  | 1.55  | 0.64  | 1.5E-05 | 1.54  | 0.62  | 2.4E-05 |
| Slc2a10  | 356   | -1.90 | -0.93 | 3.7E-08 | -1.92 | -0.94 | 2.5E-08 |
| Slc2a12  | 396   | -1.57 | -0.65 | 6.9E-04 | -1.44 | -0.53 | 7.1E-03 |
| Slc2a13  | 1621  | 1.64  | 0.71  | 9.7E-07 | 1.87  | 0.90  | 3.3E-10 |
| Slc2a3   | 5543  | 2.39  | 1.26  | 1.6E-15 | 2.54  | 1.34  | 1.4E-17 |
| Slc2a4   | 1131  | 1.97  | 0.98  | 5.7E-13 | 1.87  | 0.91  | 3.0E-11 |
| Slc2a6   | 206   | 2.18  | 1.13  | 1.1E-15 | 2.27  | 1.18  | 4.4E-17 |
| Slc2a8   | 1230  | 2.53  | 1.34  | 2.1E-46 | 2.46  | 1.30  | 1.6E-43 |
| Slc30a5  | 4959  | 1.43  | 0.51  | 4.0E-14 | 1.38  | 0.46  | 1.3E-11 |
| Slc30a7  | 4694  | 1.29  | 0.37  | 3.6E-04 | 1.43  | 0.52  | 2.8E-07 |
| Slc30a9  | 10518 | 1.40  | 0.49  | 2.4E-20 | 1.45  | 0.54  | 1.8E-24 |
| Slc31a1  | 7592  | 1.84  | 0.88  | 1.1E-30 | 1.84  | 0.88  | 1.3E-30 |
| Slc31a2  | 837   | 1.75  | 0.81  | 6.9E-18 | 1.71  | 0.77  | 1.7E-16 |
| Slc33a1  | 2313  | 1.59  | 0.67  | 5.1E-21 | 1.58  | 0.66  | 1.3E-20 |
| Slc35a1  | 2184  | -1.86 | -0.90 | 1.7E-29 | -1.83 | -0.87 | 7.3E-28 |
| Slc35a2  | 1860  | 1.42  | 0.51  | 3.9E-11 | 1.34  | 0.42  | 7.6E-08 |
| Slc35a4  | 4201  | -1.33 | -0.41 | 6.4E-05 | -1.43 | -0.51 | 4.3E-07 |
| Slc35b2  | 3654  | 1.25  | 0.33  | 5.3E-05 | 1.21  | 0.27  | 8.1E-04 |
| Slc35c1  | 1025  | 1.73  | 0.79  | 1.8E-16 | 1.66  | 0.73  | 3.0E-14 |
| Slc35c2  | 2757  | 1.44  | 0.53  | 1.1E-10 | 1.30  | 0.38  | 6.3E-06 |
| Slc35d1  | 1412  | -1.22 | -0.28 | 3.8E-02 | -1.36 | -0.44 | 9.1E-04 |
| Slc35e1  | 5103  | 1.48  | 0.56  | 2.7E-16 | 1.42  | 0.50  | 3.2E-13 |
| Slc35e2  | 5105  | 1.40  | 0.49  | 4.7E-12 | 1.33  | 0.42  | 4.8E-09 |
| Slc35e3  | 4828  | 1.30  | 0.38  | 3.1E-08 | 1.26  | 0.33  | 1.8E-06 |
| Slc35e4  | 826   | 3.00  | 1.59  | 9.4E-58 | 2.93  | 1.55  | 2.5E-55 |
| Slc35f5  | 2232  | 1.28  | 0.36  | 7.1E-05 | 1.30  | 0.38  | 2.4E-05 |
| Slc35f6  | 1727  | 1.79  | 0.84  | 4.6E-26 | 1.80  | 0.85  | 1.5E-26 |
| Slc35g2  | 423   | 2.42  | 1.28  | 1.2E-26 | 2.46  | 1.30  | 1.4E-27 |
| Slc36a1  | 2256  | 1.31  | 0.39  | 4.0E-03 | 1.29  | 0.36  | 8.3E-03 |
| Slc37a2  | 374   | 1.57  | 0.65  | 9.7E-11 | 1.41  | 0.49  | 1.3E-06 |
| Slc37a4  | 1452  | 1.45  | 0.54  | 2.4E-12 | 1.43  | 0.51  | 3.0E-11 |
| Slc38a1  | 18710 | -1.71 | -0.78 | 3.2E-11 | -1.74 | -0.80 | 9.4E-12 |
| Slc38a10 | 11004 | 1.62  | 0.69  | 9.3E-17 | 1.52  | 0.60  | 6.0E-13 |
| Slc38a2  | 22564 | -1.52 | -0.61 | 1.1E-19 | -1.53 | -0.61 | 6.5E-20 |

|          |       |       |       |         |       |       |          |
|----------|-------|-------|-------|---------|-------|-------|----------|
| Slc38a3  | 1852  | 1.48  | 0.57  | 4.8E-08 | 1.48  | 0.57  | 4.4E-08  |
| Slc38a7  | 2589  | 1.49  | 0.57  | 1.4E-11 | 1.42  | 0.50  | 3.8E-09  |
| Slc38a9  | 3959  | 1.72  | 0.78  | 4.6E-31 | 1.81  | 0.86  | 4.1E-37  |
| Slc39a10 | 10904 | -1.53 | -0.61 | 3.0E-13 | -1.44 | -0.53 | 3.1E-10  |
| Slc39a14 | 2360  | 1.39  | 0.47  | 3.9E-10 | 1.47  | 0.55  | 1.4E-13  |
| Slc39a2  | 894   | 1.61  | 0.69  | 1.2E-04 | 1.55  | 0.63  | 4.7E-04  |
| Slc39a3  | 2642  | -1.55 | -0.63 | 9.3E-06 | -1.63 | -0.70 | 6.1E-07  |
| Slc39a8  | 1275  | -1.24 | -0.31 | 3.4E-02 | -1.30 | -0.38 | 1.1E-02  |
| Slc3a1   | 459   | 4.93  | 2.30  | 2.0E-30 | 4.72  | 2.24  | 8.7E-29  |
| Slc41a2  | 228   | -2.52 | -1.33 | 1.4E-07 | -2.33 | -1.22 | 1.6E-06  |
| Slc41a3  | 222   | 1.54  | 0.63  | 5.8E-05 | 1.58  | 0.66  | 2.2E-05  |
| Slc43a2  | 2408  | -1.85 | -0.89 | 5.4E-06 | -1.79 | -0.84 | 1.9E-05  |
| Slc44a2  | 7853  | 1.77  | 0.82  | 1.6E-35 | 1.78  | 0.83  | 1.6E-36  |
| Slc45a3  | 744   | 1.97  | 0.98  | 8.6E-06 | 1.61  | 0.68  | 2.4E-03  |
| Slc45a4  | 3192  | 1.96  | 0.97  | 6.4E-33 | 1.86  | 0.89  | 6.2E-28  |
| Slc46a1  | 366   | -1.35 | -0.43 | 8.7E-06 | -1.47 | -0.55 | 5.6E-09  |
| Slc46a3  | 384   | 3.68  | 1.88  | 1.6E-63 | 3.33  | 1.73  | 2.9E-54  |
| Slc4a11  | 268   | 3.08  | 1.62  | 1.9E-33 | 2.68  | 1.42  | 1.0E-25  |
| Slc4a2   | 4977  | 1.60  | 0.67  | 2.8E-11 | 1.60  | 0.68  | 1.8E-11  |
| Slc4a3   | 2939  | -2.67 | -1.42 | 1.6E-33 | -2.62 | -1.39 | 2.2E-32  |
| Slc4a4   | 967   | -1.33 | -0.41 | 1.5E-03 | -1.29 | -0.37 | 5.0E-03  |
| Slc4a7   | 9417  | -1.25 | -0.32 | 1.5E-02 | -1.21 | -0.27 | 4.3E-02  |
| Slc52a2  | 1559  | 1.50  | 0.59  | 3.9E-16 | 1.47  | 0.56  | 1.7E-14  |
| Slc5a5   | 115   | 2.91  | 1.54  | 5.1E-15 | 2.21  | 1.15  | 8.4E-09  |
| Slc5a7   | 304   | -2.47 | -1.30 | 1.4E-05 | -2.05 | -1.03 | 7.3E-04  |
| Slc66a1  | 1131  | 2.06  | 1.04  | 1.1E-34 | 2.08  | 1.06  | 1.8E-35  |
| Slc66a2  | 1359  | 1.67  | 0.74  | 1.5E-09 | 1.70  | 0.76  | 4.3E-10  |
| Slc6a20a | 146   | -2.70 | -1.43 | 2.9E-08 | -2.54 | -1.34 | 1.7E-07  |
| Slc6a6   | 8286  | -1.25 | -0.32 | 1.6E-03 | -1.36 | -0.44 | 1.0E-05  |
| Slc6a8   | 5359  | 1.72  | 0.78  | 5.6E-29 | 1.62  | 0.69  | 4.3E-23  |
| Slc7a1   | 5217  | 1.31  | 0.39  | 5.3E-03 | 1.25  | 0.32  | 2.6E-02  |
| Slc7a11  | 667   | -3.25 | -1.70 | 5.4E-15 | -3.16 | -1.66 | 2.5E-14  |
| Slc7a2   | 1667  | 1.39  | 0.48  | 6.6E-03 | 1.61  | 0.69  | 6.6E-05  |
| Slc7a3   | 316   | 2.75  | 1.46  | 5.8E-38 | 2.79  | 1.48  | 4.9E-39  |
| Slc7a5   | 5758  | 1.57  | 0.65  | 2.8E-06 | 1.36  | 0.44  | 2.2E-03  |
| Slc7a7   | 293   | -1.48 | -0.57 | 5.4E-05 | -1.62 | -0.70 | 4.5E-07  |
| Slc7a8   | 851   | 1.33  | 0.41  | 1.0E-02 | 1.36  | 0.44  | 6.0E-03  |
| Slc8a1   | 4042  | -2.30 | -1.20 | 2.5E-05 | -1.79 | -0.84 | 4.2E-03  |
| Slc8a2   | 3842  | 1.99  | 0.99  | 4.1E-15 | 2.04  | 1.03  | 4.2E-16  |
| Slc8b1   | 870   | 4.20  | 2.07  | 3.8E-30 | 3.89  | 1.96  | 4.1E-27  |
| Slc9a3r1 | 2902  | 3.04  | 1.60  | 2.4E-31 | 2.94  | 1.55  | 1.9E-29  |
| Slc9a5   | 3399  | 1.71  | 0.77  | 8.5E-15 | 1.62  | 0.69  | 4.4E-12  |
| Slc9a6   | 7768  | 1.31  | 0.39  | 7.2E-03 | 1.39  | 0.47  | 1.1E-03  |
| Slc9a8   | 1811  | -3.13 | -1.65 | 4.3E-99 | -3.26 | -1.70 | 1.3E-105 |
| Slco1c1  | 419   | -2.22 | -1.15 | 9.3E-04 | -2.01 | -1.01 | 4.3E-03  |
| Slco2a1  | 211   | -2.43 | -1.28 | 2.4E-07 | -2.42 | -1.28 | 3.1E-07  |
| Slco2b1  | 431   | -1.78 | -0.84 | 2.5E-09 | -1.85 | -0.89 | 2.4E-10  |

|           |       |       |       |         |       |       |         |
|-----------|-------|-------|-------|---------|-------|-------|---------|
| Slco3a1   | 1369  | -1.74 | -0.80 | 5.1E-09 | -1.55 | -0.63 | 5.4E-06 |
| Slco4a1   | 394   | 3.18  | 1.67  | 3.0E-19 | 3.17  | 1.67  | 4.2E-19 |
| Slco5a1   | 5386  | -2.26 | -1.17 | 5.5E-15 | -2.03 | -1.02 | 1.3E-11 |
| Slfn9     | 1857  | -1.43 | -0.51 | 1.5E-04 | -1.33 | -0.41 | 3.3E-03 |
| Slirp     | 2316  | -1.31 | -0.38 | 1.3E-02 | -1.39 | -0.47 | 2.0E-03 |
| Slit2     | 10361 | 1.31  | 0.39  | 2.6E-04 | 1.46  | 0.54  | 2.2E-07 |
| Slitrk1   | 1872  | -1.44 | -0.53 | 8.6E-03 | -1.46 | -0.55 | 6.4E-03 |
| Slitrk4   | 1131  | 1.62  | 0.70  | 2.8E-05 | 1.72  | 0.78  | 2.3E-06 |
| Slitrk5   | 2183  | -1.56 | -0.64 | 6.1E-09 | -1.59 | -0.67 | 1.4E-09 |
| Slk       | 10088 | 1.48  | 0.56  | 3.7E-13 | 1.61  | 0.68  | 4.7E-19 |
| Smap      | 6971  | 1.39  | 0.47  | 4.8E-23 | 1.37  | 0.45  | 7.7E-21 |
| Sltm      | 10413 | -1.46 | -0.54 | 1.3E-13 | -1.48 | -0.56 | 1.8E-14 |
| Slx1b     | 1699  | 1.28  | 0.36  | 3.6E-03 | 1.26  | 0.34  | 7.2E-03 |
| Slx4ip    | 2428  | -1.63 | -0.71 | 9.7E-23 | -1.60 | -0.68 | 9.2E-21 |
| Smad1     | 3746  | -1.35 | -0.43 | 2.5E-06 | -1.39 | -0.48 | 1.6E-07 |
| Smad3     | 5247  | -1.64 | -0.71 | 2.2E-08 | -1.73 | -0.79 | 5.3E-10 |
| Smad5     | 15919 | -1.45 | -0.53 | 3.7E-20 | -1.42 | -0.51 | 1.4E-18 |
| Smagp     | 124   | 1.42  | 0.50  | 2.2E-02 | 1.46  | 0.55  | 1.3E-02 |
| Smap2     | 6084  | 1.47  | 0.56  | 7.9E-06 | 1.44  | 0.52  | 3.4E-05 |
| Smarca2   | 10932 | 1.25  | 0.33  | 3.1E-02 | 1.28  | 0.35  | 2.0E-02 |
| Smarca4   | 29774 | -1.59 | -0.67 | 5.2E-06 | -1.69 | -0.75 | 2.5E-07 |
| Smarcad1  | 10508 | -1.89 | -0.92 | 2.4E-24 | -1.87 | -0.90 | 1.0E-23 |
| Smarcal1  | 3318  | -1.56 | -0.64 | 2.4E-22 | -1.52 | -0.60 | 1.8E-19 |
| Smarcb1   | 7275  | -1.64 | -0.72 | 2.2E-12 | -1.76 | -0.82 | 7.7E-16 |
| Smarcc1   | 21646 | -1.39 | -0.48 | 1.0E-09 | -1.46 | -0.55 | 2.6E-12 |
| Smarcc2   | 27817 | -1.55 | -0.64 | 1.9E-08 | -1.63 | -0.70 | 4.3E-10 |
| Smarcd1   | 10186 | -1.80 | -0.85 | 7.4E-08 | -2.05 | -1.03 | 4.3E-11 |
| Smarce1   | 23766 | -1.53 | -0.62 | 2.2E-12 | -1.63 | -0.70 | 1.1E-15 |
| Smc1a     | 18407 | -1.37 | -0.45 | 2.0E-06 | -1.37 | -0.46 | 1.7E-06 |
| Smc5      | 12744 | 1.29  | 0.37  | 8.8E-05 | 1.37  | 0.45  | 1.3E-06 |
| Smchd1    | 15940 | 1.36  | 0.45  | 3.4E-05 | 1.51  | 0.59  | 2.6E-08 |
| Smco4     | 361   | -2.06 | -1.04 | 3.9E-09 | -2.29 | -1.20 | 1.2E-11 |
| Smg1      | 23470 | 1.46  | 0.55  | 3.4E-03 | 1.74  | 0.80  | 1.4E-05 |
| Smg5      | 9291  | -1.31 | -0.39 | 1.1E-07 | -1.39 | -0.47 | 1.4E-10 |
| Smg9      | 1076  | -2.35 | -1.23 | 2.7E-29 | -2.42 | -1.28 | 2.7E-31 |
| Smim10l1  | 4598  | -3.08 | -1.62 | 3.7E-40 | -3.04 | -1.60 | 2.8E-39 |
| Smim10l2a | 482   | -1.45 | -0.54 | 3.7E-03 | -1.50 | -0.59 | 1.4E-03 |
| Smim12    | 956   | 1.57  | 0.65  | 7.3E-09 | 1.43  | 0.51  | 6.2E-06 |
| Smim15    | 4907  | 1.29  | 0.37  | 6.1E-04 | 1.32  | 0.40  | 1.8E-04 |
| Smim18    | 289   | -3.71 | -1.89 | 5.4E-11 | -3.28 | -1.72 | 3.1E-09 |
| Smim27    | 109   | -1.69 | -0.75 | 3.2E-03 | -1.92 | -0.94 | 2.2E-04 |
| Smim3     | 322   | -1.46 | -0.55 | 1.6E-02 | -1.51 | -0.60 | 9.0E-03 |
| Smim4     | 522   | 1.62  | 0.69  | 1.4E-05 | 1.65  | 0.73  | 5.9E-06 |
| Smim8     | 791   | -1.45 | -0.53 | 4.0E-06 | -1.45 | -0.54 | 3.5E-06 |
| Smo       | 7268  | -1.62 | -0.69 | 1.6E-06 | -1.83 | -0.87 | 1.2E-09 |
| Smoc1     | 3139  | 1.30  | 0.38  | 2.4E-02 | 1.30  | 0.38  | 2.6E-02 |
| Smox      | 2171  | -1.19 | -0.25 | 1.0E-02 | -1.26 | -0.33 | 5.5E-04 |



|         |       |       |       |          |       |       |          |
|---------|-------|-------|-------|----------|-------|-------|----------|
| Smpd2   | 1965  | 1.50  | 0.59  | 1.3E-11  | 1.36  | 0.45  | 4.0E-07  |
| Smtnl2  | 508   | 2.19  | 1.13  | 5.2E-04  | 2.28  | 1.19  | 2.7E-04  |
| Smug1   | 2182  | -1.54 | -0.62 | 3.9E-12  | -1.55 | -0.63 | 2.8E-12  |
| Smyd2   | 1864  | -1.24 | -0.31 | 3.7E-04  | -1.28 | -0.35 | 4.3E-05  |
| Smyd3   | 1305  | 1.60  | 0.68  | 1.7E-15  | 1.49  | 0.58  | 1.4E-11  |
| Smyd4   | 899   | -1.23 | -0.30 | 1.1E-04  | -1.27 | -0.34 | 1.3E-05  |
| Smyd5   | 2332  | -1.42 | -0.51 | 1.7E-20  | -1.55 | -0.63 | 9.9E-31  |
| Snap23  | 4894  | 1.41  | 0.49  | 1.3E-04  | 1.31  | 0.39  | 2.8E-03  |
| Snap25  | 6289  | 1.64  | 0.71  | 8.5E-05  | 1.69  | 0.75  | 3.2E-05  |
| Snap29  | 4892  | 1.41  | 0.49  | 2.8E-14  | 1.42  | 0.50  | 7.4E-15  |
| Snapc1  | 4179  | 1.57  | 0.65  | 6.7E-15  | 1.65  | 0.72  | 6.5E-18  |
| Snapc4  | 4129  | 1.42  | 0.51  | 5.2E-12  | 1.41  | 0.50  | 8.9E-12  |
| Snapc5  | 1234  | -1.45 | -0.53 | 7.4E-03  | -1.65 | -0.72 | 2.4E-04  |
| Snapin  | 2158  | -1.35 | -0.43 | 4.0E-10  | -1.39 | -0.47 | 8.1E-12  |
| Snciaip | 2577  | -2.06 | -1.04 | 1.2E-16  | -1.95 | -0.96 | 2.6E-14  |
| Sncb    | 516   | 2.09  | 1.07  | 5.2E-03  | 2.00  | 1.00  | 9.2E-03  |
| Snd1    | 10450 | 1.27  | 0.35  | 3.4E-04  | 1.22  | 0.29  | 3.4E-03  |
| Sned1   | 4427  | -1.51 | -0.59 | 1.2E-02  | -1.44 | -0.53 | 2.7E-02  |
| Snn     | 12252 | -1.92 | -0.94 | 3.5E-30  | -1.98 | -0.99 | 3.5E-33  |
| Snrnp25 | 1146  | 1.43  | 0.52  | 5.9E-04  | 1.34  | 0.42  | 6.6E-03  |
| Snrnp35 | 926   | -2.21 | -1.14 | 1.9E-12  | -2.30 | -1.20 | 1.2E-13  |
| Snrpa1  | 3122  | 1.29  | 0.37  | 2.5E-03  | 1.23  | 0.30  | 1.6E-02  |
| Snta1   | 726   | 2.74  | 1.45  | 1.9E-47  | 2.38  | 1.25  | 2.7E-35  |
| Sntb1   | 280   | -2.57 | -1.36 | 4.1E-06  | -2.36 | -1.24 | 3.3E-05  |
| Sntb2   | 2564  | 1.26  | 0.33  | 5.9E-03  | 1.32  | 0.40  | 9.3E-04  |
| Snu13   | 7699  | 1.27  | 0.35  | 3.0E-04  | 1.25  | 0.33  | 6.9E-04  |
| Snupn   | 1253  | 1.41  | 0.50  | 9.8E-19  | 1.39  | 0.48  | 3.6E-17  |
| Snw1    | 8694  | -1.51 | -0.60 | 6.4E-12  | -1.58 | -0.66 | 3.1E-14  |
| Snx11   | 4124  | 1.46  | 0.55  | 6.9E-11  | 1.40  | 0.49  | 7.9E-09  |
| Snx14   | 3275  | 1.73  | 0.79  | 5.1E-49  | 1.81  | 0.85  | 1.9E-56  |
| Snx15   | 982   | -1.68 | -0.75 | 5.4E-12  | -1.65 | -0.72 | 2.9E-11  |
| Snx18   | 3658  | 1.30  | 0.38  | 6.0E-04  | 1.32  | 0.40  | 3.3E-04  |
| Snx19   | 4390  | -1.29 | -0.37 | 3.7E-13  | -1.31 | -0.38 | 2.8E-14  |
| Snx21   | 779   | 1.67  | 0.74  | 9.9E-14  | 1.59  | 0.66  | 3.2E-11  |
| Snx22   | 461   | 3.08  | 1.62  | 2.9E-29  | 3.19  | 1.67  | 8.0E-31  |
| Snx24   | 897   | -1.51 | -0.60 | 1.9E-03  | -1.63 | -0.70 | 2.5E-04  |
| Snx25   | 2779  | 2.10  | 1.07  | 2.2E-78  | 2.18  | 1.12  | 5.9E-86  |
| Snx30   | 5831  | 1.98  | 0.99  | 4.0E-30  | 2.09  | 1.06  | 1.2E-34  |
| Snx32   | 2821  | 1.35  | 0.44  | 4.4E-03  | 1.40  | 0.49  | 1.3E-03  |
| Snx33   | 834   | -1.42 | -0.50 | 8.2E-05  | -1.58 | -0.66 | 1.8E-07  |
| Snx8    | 2475  | 1.76  | 0.82  | 4.1E-24  | 1.64  | 0.71  | 1.9E-18  |
| Snx9    | 1323  | -2.74 | -1.45 | 2.4E-17  | -2.99 | -1.58 | 2.7E-20  |
| Soat1   | 4864  | 2.13  | 1.09  | 6.7E-35  | 1.98  | 0.98  | 1.9E-28  |
| Socs7   | 10486 | 1.47  | 0.55  | 4.7E-05  | 1.46  | 0.55  | 5.9E-05  |
| Sod2    | 6897  | 2.26  | 1.18  | 2.9E-152 | 2.29  | 1.20  | 1.3E-156 |
| Soga3   | 5035  | -1.90 | -0.93 | 8.4E-07  | -1.83 | -0.87 | 3.9E-06  |
| Sorbs2  | 9516  | -1.96 | -0.97 | 1.8E-12  | -1.80 | -0.84 | 1.1E-09  |

|         |       |       |       |         |       |       |         |
|---------|-------|-------|-------|---------|-------|-------|---------|
| Sorbs3  | 1351  | -1.48 | -0.57 | 1.9E-03 | -1.61 | -0.69 | 1.3E-04 |
| Sorcs2  | 2917  | -1.39 | -0.47 | 5.6E-06 | -1.46 | -0.55 | 1.2E-07 |
| Sord    | 2502  | 1.89  | 0.92  | 1.0E-26 | 1.74  | 0.80  | 1.2E-20 |
| Sort1   | 17489 | 1.62  | 0.70  | 5.5E-18 | 1.65  | 0.72  | 4.4E-19 |
| Sos1    | 9101  | 1.25  | 0.32  | 6.5E-03 | 1.29  | 0.37  | 2.0E-03 |
| Sostdc1 | 486   | -2.37 | -1.24 | 2.2E-03 | -1.90 | -0.93 | 2.6E-02 |
| Sowahc  | 2621  | 1.66  | 0.73  | 2.3E-49 | 1.65  | 0.73  | 1.6E-48 |
| Sox12   | 10023 | -1.54 | -0.62 | 3.9E-09 | -1.62 | -0.69 | 4.8E-11 |
| Sox17   | 356   | -1.53 | -0.62 | 3.3E-05 | -1.75 | -0.80 | 4.1E-08 |
| Sox18   | 409   | -1.93 | -0.95 | 1.1E-05 | -2.13 | -1.09 | 4.2E-07 |
| Sox4    | 50721 | -1.28 | -0.36 | 3.2E-02 | -1.38 | -0.46 | 4.9E-03 |
| Sox6    | 5597  | -1.29 | -0.37 | 2.3E-02 | -1.32 | -0.40 | 1.4E-02 |
| Sox7    | 428   | -1.74 | -0.80 | 3.7E-12 | -1.89 | -0.92 | 1.7E-15 |
| Sox9    | 5279  | -1.58 | -0.66 | 2.7E-04 | -1.79 | -0.84 | 2.6E-06 |
| Sp1     | 8616  | -1.26 | -0.33 | 7.3E-07 | -1.20 | -0.27 | 7.9E-05 |
| Sp2     | 1254  | -1.49 | -0.58 | 2.2E-03 | -1.63 | -0.71 | 1.5E-04 |
| Sp3     | 9744  | -1.51 | -0.59 | 3.1E-11 | -1.49 | -0.58 | 7.0E-11 |
| Sp7     | 157   | -2.92 | -1.55 | 1.8E-03 | -3.25 | -1.70 | 5.8E-04 |
| Spaca6  | 5327  | -3.74 | -1.90 | 2.9E-63 | -3.67 | -1.87 | 2.5E-61 |
| Spag4   | 580   | 1.58  | 0.66  | 1.2E-07 | 1.44  | 0.52  | 3.7E-05 |
| Spag6l  | 438   | 1.71  | 0.78  | 5.5E-04 | 2.01  | 1.01  | 5.6E-06 |
| Spag7   | 2715  | -2.17 | -1.12 | 1.1E-27 | -2.56 | -1.36 | 2.9E-40 |
| Sparc   | 25277 | -1.37 | -0.46 | 2.6E-02 | -1.40 | -0.49 | 1.8E-02 |
| Sparcl1 | 6073  | -1.59 | -0.67 | 2.4E-04 | -1.48 | -0.56 | 2.5E-03 |
| Spata1  | 653   | 1.32  | 0.40  | 1.7E-03 | 1.52  | 0.60  | 1.5E-06 |
| Spata13 | 9483  | 1.51  | 0.59  | 3.8E-04 | 1.48  | 0.56  | 7.9E-04 |
| Spata2  | 2931  | 1.71  | 0.78  | 6.8E-12 | 1.56  | 0.64  | 2.3E-08 |
| Spata24 | 187   | 1.37  | 0.46  | 4.2E-03 | 1.46  | 0.55  | 5.9E-04 |
| Spata2l | 191   | 2.90  | 1.53  | 1.5E-19 | 2.82  | 1.50  | 1.0E-18 |
| Spata33 | 590   | 1.55  | 0.63  | 4.5E-10 | 1.55  | 0.63  | 6.3E-10 |
| Spata5  | 2791  | 1.56  | 0.64  | 1.0E-12 | 1.46  | 0.55  | 1.4E-09 |
| Spata6  | 2035  | 2.13  | 1.09  | 1.5E-13 | 2.11  | 1.08  | 3.0E-13 |
| Spata7  | 1542  | 1.63  | 0.71  | 1.8E-29 | 1.65  | 0.72  | 7.9E-31 |
| Spats2  | 6748  | 1.45  | 0.53  | 4.8E-13 | 1.33  | 0.41  | 3.6E-08 |
| Spats2l | 1991  | -3.12 | -1.64 | 2.4E-26 | -2.88 | -1.53 | 6.7E-23 |
| Spc24   | 2030  | -1.51 | -0.60 | 8.3E-03 | -1.74 | -0.80 | 2.9E-04 |
| Specc1  | 5673  | 1.55  | 0.63  | 1.6E-15 | 1.52  | 0.60  | 3.7E-14 |
| Specc1l | 8424  | -1.83 | -0.87 | 1.5E-40 | -1.72 | -0.78 | 2.4E-32 |
| Spef1   | 3543  | 1.42  | 0.51  | 2.5E-03 | 1.34  | 0.42  | 1.5E-02 |
| Speg    | 2616  | 1.43  | 0.52  | 1.5E-03 | 1.37  | 0.45  | 6.1E-03 |
| Spem1   | 137   | 3.39  | 1.76  | 2.0E-10 | 3.30  | 1.72  | 5.4E-10 |
| Spg11   | 4046  | -1.60 | -0.67 | 7.9E-08 | -1.49 | -0.57 | 6.3E-06 |
| Spg20   | 4046  | -1.41 | -0.49 | 3.6E-04 | -1.38 | -0.47 | 7.9E-04 |
| Spg7    | 3473  | -1.55 | -0.63 | 1.3E-14 | -1.60 | -0.68 | 6.8E-17 |
| Spin1   | 15490 | -1.79 | -0.84 | 1.8E-17 | -1.89 | -0.92 | 1.0E-20 |
| Spink10 | 796   | 2.26  | 1.18  | 2.4E-15 | 2.65  | 1.40  | 2.8E-21 |
| Spire1  | 10690 | 1.51  | 0.60  | 1.9E-11 | 1.53  | 0.62  | 4.1E-12 |

|         |       |       |       |         |       |       |         |
|---------|-------|-------|-------|---------|-------|-------|---------|
| Spon2   | 113   | -2.15 | -1.11 | 3.1E-06 | -2.72 | -1.44 | 8.9E-10 |
| Spopl   | 2489  | -1.38 | -0.47 | 2.3E-06 | -1.35 | -0.43 | 1.4E-05 |
| Spout1  | 3364  | 1.38  | 0.46  | 1.4E-04 | 1.26  | 0.33  | 7.4E-03 |
| Sppl2a  | 5520  | -1.51 | -0.59 | 1.6E-16 | -1.44 | -0.53 | 2.3E-13 |
| Sppl2b  | 3055  | 1.44  | 0.52  | 2.4E-08 | 1.35  | 0.43  | 6.5E-06 |
| Spr     | 1109  | -1.31 | -0.39 | 4.1E-03 | -1.52 | -0.61 | 5.2E-06 |
| Spring1 | 4743  | 1.79  | 0.84  | 1.7E-36 | 1.85  | 0.88  | 1.4E-40 |
| Sprn    | 295   | -3.01 | -1.59 | 2.4E-07 | -3.07 | -1.62 | 1.5E-07 |
| Sprtn   | 3559  | 1.34  | 0.42  | 5.2E-09 | 1.24  | 0.31  | 2.8E-05 |
| Spry1   | 1203  | -1.37 | -0.45 | 2.8E-03 | -1.54 | -0.63 | 2.4E-05 |
| Spryd7  | 1753  | 1.42  | 0.51  | 4.6E-05 | 1.53  | 0.61  | 8.0E-07 |
| Spsb1   | 650   | 1.32  | 0.40  | 2.2E-02 | 1.41  | 0.50  | 3.7E-03 |
| Spsb2   | 367   | 2.55  | 1.35  | 1.4E-23 | 2.40  | 1.26  | 7.1E-21 |
| Spsb3   | 2270  | 1.35  | 0.43  | 2.3E-08 | 1.26  | 0.34  | 1.5E-05 |
| Spsb4   | 2053  | -1.50 | -0.59 | 4.0E-03 | -1.78 | -0.83 | 2.9E-05 |
| Sptbn2  | 13417 | -1.76 | -0.81 | 2.4E-04 | -1.71 | -0.77 | 5.3E-04 |
| Sptbn4  | 1642  | 1.84  | 0.88  | 1.6E-02 | 2.01  | 1.01  | 5.7E-03 |
| Sptlc2  | 8005  | 1.96  | 0.97  | 2.0E-25 | 2.11  | 1.08  | 4.7E-31 |
| Spty2d1 | 2481  | 1.37  | 0.45  | 5.4E-06 | 1.35  | 0.44  | 1.2E-05 |
| Spx     | 311   | 1.66  | 0.73  | 2.6E-05 | 1.95  | 0.96  | 1.9E-08 |
| Sqle    | 13030 | 1.50  | 0.59  | 1.2E-12 | 1.40  | 0.49  | 4.2E-09 |
| Sqstm1  | 10091 | 1.55  | 0.63  | 6.2E-16 | 1.58  | 0.66  | 4.2E-17 |
| Sra1    | 2348  | -1.23 | -0.30 | 1.8E-09 | -1.30 | -0.37 | 6.3E-14 |
| Src     | 5937  | -2.49 | -1.32 | 4.8E-21 | -2.70 | -1.44 | 7.6E-25 |
| Srcap   | 371   | -3.68 | -1.88 | 8.6E-20 | -3.26 | -1.71 | 1.9E-16 |
| Srd5a1  | 1783  | 3.14  | 1.65  | 1.4E-92 | 3.17  | 1.66  | 2.6E-93 |
| Srd5a3  | 489   | -2.21 | -1.14 | 4.8E-52 | -2.18 | -1.13 | 1.3E-50 |
| Srek1   | 9527  | -2.85 | -1.51 | 4.7E-51 | -2.87 | -1.52 | 6.0E-52 |
| Srf     | 2203  | 1.31  | 0.39  | 1.6E-03 | 1.20  | 0.27  | 3.7E-02 |
| Srgap1  | 6536  | -1.90 | -0.92 | 2.5E-05 | -1.91 | -0.93 | 2.0E-05 |
| Srgap2  | 10639 | 1.42  | 0.51  | 3.8E-08 | 1.46  | 0.55  | 2.2E-09 |
| Srprb   | 4548  | 1.27  | 0.35  | 4.0E-09 | 1.20  | 0.27  | 8.5E-06 |
| Srpx    | 451   | -2.16 | -1.11 | 1.2E-04 | -2.01 | -1.01 | 5.7E-04 |
| Srr     | 4555  | 1.42  | 0.50  | 3.0E-06 | 1.52  | 0.61  | 1.6E-08 |
| Srsf1   | 1566  | -1.36 | -0.44 | 5.6E-03 | -1.33 | -0.41 | 1.2E-02 |
| Srsf3   | 47495 | -1.30 | -0.37 | 5.4E-05 | -1.29 | -0.36 | 1.0E-04 |
| Srsf4   | 7466  | -1.34 | -0.42 | 9.7E-04 | -1.46 | -0.55 | 1.4E-05 |
| Srsf5   | 35498 | -1.28 | -0.36 | 7.4E-05 | -1.33 | -0.41 | 3.5E-06 |
| Srsf6   | 34547 | -2.03 | -1.02 | 8.1E-29 | -2.20 | -1.14 | 1.6E-35 |
| Srsf7   | 25856 | -1.48 | -0.57 | 1.2E-12 | -1.47 | -0.56 | 2.2E-12 |
| Srxn1   | 1307  | 1.87  | 0.90  | 4.2E-19 | 1.70  | 0.77  | 4.2E-14 |
| Ss18l2  | 1282  | 1.52  | 0.60  | 4.2E-11 | 1.56  | 0.64  | 1.4E-12 |
| Ssbp2   | 8311  | 1.50  | 0.59  | 1.5E-11 | 1.59  | 0.67  | 1.3E-14 |
| Ssbp4   | 2812  | 1.45  | 0.54  | 3.3E-08 | 1.41  | 0.50  | 3.3E-07 |
| Ssc5d   | 536   | -1.37 | -0.46 | 3.2E-02 | -1.50 | -0.59 | 5.1E-03 |
| Ssh1    | 2434  | -1.39 | -0.47 | 5.5E-06 | -1.52 | -0.61 | 3.8E-09 |
| Ssh3    | 1943  | 1.75  | 0.81  | 7.8E-07 | 1.89  | 0.92  | 2.0E-08 |

|            |       |       |       |         |       |       |         |
|------------|-------|-------|-------|---------|-------|-------|---------|
| Sspn       | 646   | -2.26 | -1.18 | 8.9E-08 | -2.36 | -1.24 | 1.8E-08 |
| Sspo       | 103   | -1.75 | -0.81 | 4.7E-04 | -1.49 | -0.58 | 1.5E-02 |
| Ssr2       | 6877  | 1.29  | 0.36  | 2.9E-03 | 1.26  | 0.34  | 5.9E-03 |
| Ssrp1      | 22251 | -1.31 | -0.39 | 7.7E-05 | -1.43 | -0.52 | 8.9E-08 |
| Sst        | 803   | -1.79 | -0.84 | 1.0E-02 | -1.86 | -0.90 | 6.2E-03 |
| Sstr2      | 819   | -1.84 | -0.88 | 3.9E-05 | -1.53 | -0.61 | 5.4E-03 |
| Ssx2ip     | 4403  | 1.86  | 0.89  | 4.9E-18 | 1.70  | 0.77  | 1.4E-13 |
| St18       | 3717  | -1.99 | -0.99 | 7.2E-10 | -1.98 | -0.99 | 9.8E-10 |
| St3gal4    | 965   | -1.39 | -0.48 | 4.1E-04 | -1.54 | -0.62 | 3.2E-06 |
| St3gal5    | 2703  | 1.36  | 0.45  | 9.4E-09 | 1.34  | 0.42  | 5.6E-08 |
| St3gal6    | 437   | -1.56 | -0.64 | 2.8E-07 | -1.68 | -0.74 | 2.4E-09 |
| St6gal1    | 3911  | -1.95 | -0.97 | 5.1E-62 | -2.04 | -1.03 | 2.1E-70 |
| St6galnac4 | 1628  | 2.17  | 1.12  | 4.5E-26 | 2.22  | 1.15  | 1.9E-27 |
| St6galnac6 | 1758  | 2.32  | 1.21  | 7.9E-31 | 2.30  | 1.20  | 3.2E-30 |
| St7        | 2111  | -1.57 | -0.65 | 5.2E-08 | -1.50 | -0.58 | 1.5E-06 |
| St7l       | 1691  | -1.40 | -0.49 | 8.8E-12 | -1.31 | -0.39 | 8.5E-08 |
| St8sia1    | 4148  | -1.62 | -0.70 | 3.3E-04 | -1.45 | -0.54 | 7.1E-03 |
| St8sia2    | 9960  | -1.84 | -0.88 | 8.8E-05 | -1.91 | -0.94 | 3.1E-05 |
| St8sia3    | 1765  | -4.17 | -2.06 | 4.5E-18 | -4.14 | -2.05 | 7.0E-18 |
| St8sia5    | 157   | 2.54  | 1.35  | 4.2E-06 | 2.48  | 1.31  | 7.5E-06 |
| Stab1      | 4245  | -1.34 | -0.42 | 3.2E-02 | -1.41 | -0.49 | 1.0E-02 |
| Stac       | 129   | -1.90 | -0.92 | 2.4E-04 | -1.91 | -0.94 | 2.1E-04 |
| Stac2      | 1114  | 5.32  | 2.41  | 1.8E-34 | 5.17  | 2.37  | 2.3E-33 |
| Stac3      | 490   | -1.44 | -0.52 | 1.6E-02 | -1.39 | -0.47 | 3.2E-02 |
| Stag1      | 8175  | -2.42 | -1.28 | 1.3E-51 | -2.34 | -1.23 | 7.8E-48 |
| Stag2      | 13202 | -1.55 | -0.63 | 5.0E-08 | -1.39 | -0.47 | 6.7E-05 |
| Stag3      | 965   | 1.65  | 0.72  | 4.9E-06 | 1.63  | 0.71  | 7.6E-06 |
| Stam2      | 5072  | 1.24  | 0.31  | 6.5E-06 | 1.26  | 0.34  | 1.3E-06 |
| Stambpl1   | 339   | 1.51  | 0.60  | 6.9E-04 | 1.72  | 0.78  | 7.4E-06 |
| Star       | 329   | 2.69  | 1.43  | 1.1E-25 | 2.70  | 1.43  | 7.9E-26 |
| Stard10    | 671   | 1.64  | 0.72  | 4.9E-06 | 1.72  | 0.78  | 5.9E-07 |
| Stard4     | 5817  | 1.52  | 0.60  | 1.6E-07 | 1.51  | 0.59  | 2.4E-07 |
| Stard5     | 1341  | 2.68  | 1.42  | 1.0E-35 | 2.66  | 1.41  | 5.0E-35 |
| Stat1      | 690   | 1.88  | 0.91  | 2.1E-23 | 1.90  | 0.93  | 2.6E-24 |
| Stat2      | 3380  | 1.76  | 0.81  | 3.0E-31 | 1.80  | 0.85  | 3.9E-34 |
| Stat3      | 5850  | 2.72  | 1.45  | 1.2E-44 | 2.69  | 1.43  | 1.7E-43 |
| Stat6      | 763   | -1.75 | -0.80 | 4.6E-05 | -1.80 | -0.85 | 1.5E-05 |
| Stau2      | 4911  | -1.37 | -0.45 | 6.4E-05 | -1.41 | -0.49 | 1.4E-05 |
| Stbd1      | 629   | 2.08  | 1.06  | 4.7E-10 | 2.13  | 1.09  | 1.5E-10 |
| Stc1       | 534   | 1.35  | 0.43  | 8.9E-03 | 1.35  | 0.44  | 9.0E-03 |
| Stc2       | 494   | 2.83  | 1.50  | 2.1E-23 | 2.55  | 1.35  | 4.8E-19 |
| Steap1     | 140   | 3.02  | 1.59  | 7.9E-18 | 2.69  | 1.43  | 1.3E-14 |
| Stil       | 4088  | 1.35  | 0.43  | 1.6E-02 | 1.30  | 0.38  | 3.5E-02 |
| Stim1      | 2915  | 2.24  | 1.16  | 1.2E-35 | 2.26  | 1.18  | 1.5E-36 |
| Stim2      | 3047  | 1.41  | 0.50  | 3.3E-08 | 1.39  | 0.48  | 1.1E-07 |
| Stimate    | 1907  | 1.49  | 0.58  | 8.0E-22 | 1.44  | 0.53  | 1.9E-18 |
| Sting1     | 128   | -2.33 | -1.22 | 2.8E-06 | -2.14 | -1.10 | 2.9E-05 |

|         |       |       |       |         |       |       |         |
|---------|-------|-------|-------|---------|-------|-------|---------|
| Stip1   | 21805 | 1.39  | 0.47  | 2.3E-06 | 1.25  | 0.32  | 1.6E-03 |
| Stk10   | 845   | 1.81  | 0.85  | 9.9E-14 | 1.77  | 0.82  | 9.0E-13 |
| Stk17b  | 1393  | 1.95  | 0.97  | 1.1E-15 | 1.98  | 0.99  | 2.4E-16 |
| Stk25   | 13624 | 1.25  | 0.32  | 1.3E-17 | 1.22  | 0.28  | 6.3E-14 |
| Stk38   | 13352 | 1.29  | 0.37  | 5.0E-10 | 1.23  | 0.30  | 7.9E-07 |
| Stk38l  | 2637  | 1.94  | 0.96  | 6.0E-32 | 2.01  | 1.00  | 6.1E-35 |
| Stk4    | 8426  | 1.54  | 0.62  | 2.6E-16 | 1.52  | 0.60  | 1.9E-15 |
| Stk40   | 5297  | 1.73  | 0.79  | 4.3E-15 | 1.65  | 0.73  | 6.4E-13 |
| Stn1    | 1701  | -1.60 | -0.67 | 1.7E-13 | -1.65 | -0.72 | 3.5E-15 |
| Stom    | 1955  | 2.89  | 1.53  | 7.3E-28 | 2.64  | 1.40  | 1.8E-23 |
| Ston2   | 4113  | 1.62  | 0.69  | 5.3E-07 | 1.67  | 0.74  | 7.6E-08 |
| Stra6   | 924   | -1.96 | -0.97 | 1.0E-07 | -2.12 | -1.09 | 1.9E-09 |
| Strip2  | 678   | 4.36  | 2.12  | 6.3E-41 | 4.77  | 2.25  | 1.1E-45 |
| Strn3   | 7456  | -1.57 | -0.65 | 5.6E-16 | -1.50 | -0.59 | 3.7E-13 |
| Strn4   | 10352 | -1.37 | -0.45 | 9.0E-06 | -1.42 | -0.50 | 8.7E-07 |
| Stub1   | 4959  | 1.25  | 0.32  | 1.0E-04 | 1.16  | 0.21  | 1.2E-02 |
| Stum    | 563   | 2.23  | 1.16  | 1.7E-04 | 2.57  | 1.36  | 8.9E-06 |
| Stx11   | 282   | 2.71  | 1.44  | 1.8E-09 | 2.70  | 1.43  | 2.1E-09 |
| Stx16   | 7226  | -1.32 | -0.40 | 2.0E-05 | -1.36 | -0.45 | 2.0E-06 |
| Stx18   | 1175  | -1.59 | -0.67 | 1.1E-09 | -1.68 | -0.75 | 9.8E-12 |
| Stx1a   | 2912  | 1.38  | 0.46  | 5.2E-03 | 1.36  | 0.45  | 7.0E-03 |
| Stx2    | 3037  | 1.41  | 0.50  | 1.4E-15 | 1.44  | 0.52  | 8.4E-17 |
| Stx3    | 1545  | 1.40  | 0.48  | 7.5E-05 | 1.38  | 0.46  | 1.6E-04 |
| Stx6    | 7454  | 1.45  | 0.53  | 7.1E-24 | 1.45  | 0.54  | 4.6E-24 |
| Stx7    | 9746  | 1.38  | 0.47  | 1.1E-04 | 1.40  | 0.48  | 6.2E-05 |
| Stxbp4  | 3633  | -1.54 | -0.62 | 2.9E-16 | -1.49 | -0.57 | 5.0E-14 |
| Stxbp5  | 4749  | 1.46  | 0.54  | 3.0E-06 | 1.50  | 0.58  | 4.8E-07 |
| Stxbp5l | 612   | 2.27  | 1.18  | 6.0E-04 | 2.96  | 1.56  | 3.9E-06 |
| Stxbp6  | 1105  | -1.50 | -0.58 | 4.1E-08 | -1.63 | -0.70 | 2.7E-11 |
| Styx    | 2624  | 1.33  | 0.42  | 3.1E-05 | 1.41  | 0.50  | 4.9E-07 |
| Sub1    | 17595 | 1.26  | 0.33  | 7.5E-06 | 1.29  | 0.37  | 4.6E-07 |
| Suclg1  | 5144  | 1.45  | 0.53  | 6.0E-14 | 1.43  | 0.51  | 5.3E-13 |
| Suclg2  | 2080  | -1.39 | -0.48 | 3.0E-03 | -1.50 | -0.59 | 2.4E-04 |
| Suds3   | 10665 | 1.60  | 0.68  | 5.3E-27 | 1.55  | 0.64  | 7.9E-24 |
| Sulf2   | 12815 | -1.49 | -0.57 | 7.7E-03 | -1.50 | -0.59 | 6.3E-03 |
| Sult5a1 | 138   | -2.24 | -1.16 | 2.0E-02 | -2.08 | -1.06 | 3.7E-02 |
| Sumf1   | 1092  | -1.34 | -0.43 | 9.9E-05 | -1.45 | -0.53 | 8.5E-07 |
| Sumf2   | 1500  | -1.24 | -0.31 | 2.9E-03 | -1.25 | -0.33 | 1.5E-03 |
| Sumo3   | 6505  | -1.39 | -0.48 | 4.8E-09 | -1.51 | -0.59 | 3.1E-13 |
| Sun1    | 7751  | 1.68  | 0.75  | 3.6E-33 | 1.70  | 0.77  | 1.0E-34 |
| Suox    | 1368  | 2.18  | 1.13  | 2.5E-27 | 2.08  | 1.05  | 4.9E-24 |
| Supt3   | 750   | -1.50 | -0.59 | 1.3E-07 | -1.59 | -0.67 | 1.7E-09 |
| Supt5   | 16134 | 1.42  | 0.51  | 6.9E-18 | 1.33  | 0.41  | 4.1E-12 |
| Supt6   | 16116 | 1.29  | 0.37  | 4.9E-08 | 1.29  | 0.37  | 6.9E-08 |
| Supt7l  | 1799  | -1.72 | -0.78 | 1.8E-25 | -1.84 | -0.88 | 5.0E-32 |
| Supv3l1 | 1953  | -1.23 | -0.30 | 2.4E-05 | -1.29 | -0.37 | 1.8E-07 |
| Susd1   | 208   | -1.50 | -0.59 | 2.9E-03 | -1.54 | -0.62 | 1.7E-03 |

|         |       |        |       |         |       |       |          |
|---------|-------|--------|-------|---------|-------|-------|----------|
| Susd2   | 309   | 1.35   | 0.43  | 1.9E-03 | 1.35  | 0.43  | 1.9E-03  |
| Susd5   | 292   | -9.88  | -3.30 | 4.4E-05 | -7.69 | -2.94 | 3.2E-04  |
| Susd6   | 3279  | 1.35   | 0.43  | 3.3E-13 | 1.26  | 0.34  | 2.1E-08  |
| Svip    | 2706  | 1.92   | 0.94  | 1.6E-23 | 2.02  | 1.02  | 1.8E-27  |
| Swap70  | 2701  | 1.35   | 0.43  | 9.4E-07 | 1.32  | 0.40  | 5.4E-06  |
| Swsap1  | 912   | -1.67  | -0.74 | 4.3E-16 | -1.93 | -0.95 | 4.7E-26  |
| Swt1    | 2572  | 1.71   | 0.78  | 9.7E-17 | 1.81  | 0.86  | 3.6E-20  |
| Syap1   | 4114  | 1.57   | 0.65  | 3.4E-09 | 1.54  | 0.62  | 1.7E-08  |
| Sybu    | 2165  | -1.37  | -0.45 | 4.5E-02 | -1.44 | -0.53 | 1.7E-02  |
| Syce2   | 1215  | 1.57   | 0.65  | 4.0E-07 | 1.46  | 0.55  | 2.5E-05  |
| Syde1   | 1619  | -1.47  | -0.55 | 7.3E-04 | -1.56 | -0.64 | 8.3E-05  |
| Syde2   | 887   | 1.65   | 0.72  | 4.0E-23 | 1.77  | 0.83  | 8.3E-30  |
| Syn2    | 1795  | 1.63   | 0.70  | 3.8E-02 | 1.78  | 0.83  | 1.3E-02  |
| Syncrip | 22048 | -1.48  | -0.57 | 7.5E-10 | -1.51 | -0.60 | 7.8E-11  |
| Syndig1 | 346   | -1.37  | -0.46 | 1.4E-04 | -1.38 | -0.46 | 1.4E-04  |
| Syne3   | 316   | 2.76   | 1.47  | 2.0E-05 | 3.53  | 1.82  | 9.7E-08  |
| Syne4   | 892   | 1.47   | 0.56  | 1.5E-03 | 1.62  | 0.70  | 6.0E-05  |
| Syngr1  | 2628  | 2.29   | 1.20  | 3.0E-06 | 2.30  | 1.20  | 2.8E-06  |
| Syngr2  | 829   | 2.30   | 1.20  | 5.9E-14 | 2.12  | 1.08  | 1.6E-11  |
| Synj1   | 9528  | 1.46   | 0.55  | 1.1E-03 | 1.54  | 0.62  | 1.8E-04  |
| Synj2   | 310   | -1.81  | -0.86 | 6.6E-03 | -1.74 | -0.80 | 1.2E-02  |
| Synj2bp | 3736  | 1.39   | 0.48  | 3.3E-10 | 1.44  | 0.52  | 4.5E-12  |
| Synpo   | 2894  | -2.02  | -1.01 | 7.6E-03 | -1.91 | -0.93 | 1.5E-02  |
| Synpo2l | 136   | -18.20 | -4.19 | 1.3E-06 | -8.63 | -3.11 | 4.2E-04  |
| Synrg   | 6993  | -1.33  | -0.41 | 7.1E-04 | -1.33 | -0.41 | 8.1E-04  |
| Syt11   | 19138 | -1.32  | -0.40 | 1.2E-04 | -1.40 | -0.48 | 2.6E-06  |
| Syt14   | 4701  | 1.35   | 0.44  | 2.7E-04 | 1.47  | 0.55  | 2.9E-06  |
| Syt5    | 1215  | -1.84  | -0.88 | 9.1E-05 | -1.96 | -0.97 | 1.5E-05  |
| T2      | 116   | 3.23   | 1.69  | 5.5E-15 | 3.92  | 1.97  | 1.5E-19  |
| Tab1    | 2078  | -2.65  | -1.41 | 1.6E-92 | -2.86 | -1.52 | 7.8E-107 |
| Tab2    | 9166  | -1.37  | -0.45 | 2.1E-25 | -1.40 | -0.48 | 2.6E-28  |
| Tacc2   | 7124  | -1.50  | -0.58 | 5.9E-06 | -1.52 | -0.60 | 2.5E-06  |
| Tada1   | 3144  | -1.55  | -0.63 | 3.8E-14 | -1.51 | -0.59 | 1.5E-12  |
| Tada3   | 2064  | -2.02  | -1.01 | 9.4E-14 | -2.28 | -1.19 | 1.3E-18  |
| Taf1    | 11862 | 1.26   | 0.33  | 3.9E-04 | 1.36  | 0.44  | 1.7E-06  |
| Taf10   | 4280  | 1.68   | 0.75  | 2.2E-16 | 1.55  | 0.64  | 5.0E-12  |
| Taf12   | 2366  | 1.44   | 0.53  | 4.4E-09 | 1.30  | 0.38  | 3.9E-05  |
| Taf13   | 5379  | 1.74   | 0.80  | 1.2E-11 | 1.73  | 0.79  | 1.7E-11  |
| Taf3    | 2425  | 1.48   | 0.56  | 1.1E-09 | 1.40  | 0.48  | 2.1E-07  |
| Taf4    | 3798  | 1.37   | 0.45  | 4.0E-04 | 1.28  | 0.35  | 7.5E-03  |
| Taf4b   | 421   | 2.47   | 1.30  | 4.9E-10 | 2.51  | 1.33  | 2.3E-10  |
| Taf5    | 2229  | 1.25   | 0.32  | 4.0E-05 | 1.18  | 0.24  | 2.7E-03  |
| Taf5l   | 1612  | -1.82  | -0.86 | 3.2E-24 | -1.98 | -0.99 | 1.4E-31  |
| Taf6    | 5567  | 1.28   | 0.35  | 8.3E-05 | 1.18  | 0.24  | 1.1E-02  |
| Taf6l   | 1731  | 1.65   | 0.72  | 4.3E-15 | 1.54  | 0.62  | 1.9E-11  |
| Taf8    | 2115  | -1.20  | -0.26 | 4.5E-03 | -1.29 | -0.37 | 4.4E-05  |
| Taf9b   | 529   | -4.59  | -2.20 | 6.7E-91 | -4.96 | -2.31 | 7.1E-100 |



|          |       |       |       |         |       |       |         |
|----------|-------|-------|-------|---------|-------|-------|---------|
| Tafa4    | 313   | 2.52  | 1.33  | 2.3E-08 | 2.73  | 1.45  | 9.6E-10 |
| Tagap1   | 2327  | -1.27 | -0.34 | 7.2E-08 | -1.33 | -0.41 | 6.4E-11 |
| Tagln2   | 2484  | 1.26  | 0.34  | 1.4E-02 | 1.28  | 0.36  | 9.7E-03 |
| Tagln3   | 7661  | -1.92 | -0.94 | 4.5E-11 | -1.87 | -0.90 | 3.3E-10 |
| Tal1     | 2195  | -2.22 | -1.15 | 4.6E-05 | -2.33 | -1.22 | 1.5E-05 |
| Tal2     | 3441  | -2.40 | -1.26 | 2.2E-03 | -2.80 | -1.48 | 2.9E-04 |
| Taldo1   | 8784  | 1.27  | 0.35  | 4.4E-04 | 1.24  | 0.31  | 2.2E-03 |
| Tamalin  | 845   | 1.62  | 0.70  | 1.9E-05 | 1.46  | 0.55  | 9.3E-04 |
| Tamm41   | 1643  | 1.25  | 0.33  | 4.8E-04 | 1.20  | 0.26  | 6.6E-03 |
| Tanc1    | 3209  | 1.30  | 0.38  | 4.3E-04 | 1.33  | 0.41  | 1.3E-04 |
| Tango6   | 546   | -3.09 | -1.63 | 1.7E-42 | -2.99 | -1.58 | 6.9E-40 |
| Tank     | 2874  | 1.70  | 0.76  | 1.2E-23 | 1.82  | 0.87  | 4.5E-30 |
| Taok1    | 12512 | -1.49 | -0.57 | 4.8E-06 | -1.36 | -0.44 | 4.8E-04 |
| Taok3    | 3732  | 1.95  | 0.96  | 1.8E-14 | 1.89  | 0.91  | 3.9E-13 |
| Tap1     | 311   | 3.23  | 1.69  | 3.3E-21 | 3.06  | 1.61  | 2.6E-19 |
| Tap2     | 168   | 4.79  | 2.26  | 1.1E-28 | 4.79  | 2.26  | 1.2E-28 |
| Tapbpl   | 112   | -2.39 | -1.26 | 6.0E-09 | -2.30 | -1.20 | 3.8E-08 |
| Tarbp2   | 2167  | -2.29 | -1.19 | 3.3E-44 | -2.53 | -1.34 | 2.9E-55 |
| Tars     | 7300  | 1.40  | 0.48  | 1.0E-04 | 1.37  | 0.45  | 2.7E-04 |
| Tars2    | 2372  | -1.99 | -0.99 | 1.2E-45 | -2.02 | -1.01 | 2.2E-47 |
| Tarsl2   | 1149  | -1.48 | -0.57 | 1.9E-20 | -1.40 | -0.49 | 1.9E-15 |
| Tas1r3   | 123   | 1.94  | 0.95  | 2.4E-06 | 1.82  | 0.86  | 2.6E-05 |
| Tasor    | 6356  | -1.51 | -0.59 | 1.8E-07 | -1.48 | -0.57 | 7.3E-07 |
| Tasor2   | 13914 | 1.22  | 0.28  | 4.3E-02 | 1.40  | 0.49  | 3.0E-04 |
| Tatdn2   | 3628  | 1.65  | 0.72  | 9.1E-20 | 1.64  | 0.71  | 1.7E-19 |
| Tatdn3   | 667   | -2.25 | -1.17 | 1.5E-30 | -2.13 | -1.09 | 1.2E-26 |
| Tax1bp3  | 1992  | -1.37 | -0.45 | 6.4E-10 | -1.43 | -0.51 | 1.7E-12 |
| Tbc1d1   | 4443  | 1.49  | 0.58  | 9.6E-16 | 1.53  | 0.61  | 2.9E-17 |
| Tbc1d10a | 1112  | 1.30  | 0.38  | 2.9E-04 | 1.28  | 0.36  | 8.5E-04 |
| Tbc1d10b | 6167  | 1.44  | 0.52  | 5.1E-06 | 1.37  | 0.46  | 8.4E-05 |
| Tbc1d12  | 2436  | 1.39  | 0.47  | 3.0E-06 | 1.51  | 0.60  | 2.3E-09 |
| Tbc1d15  | 4447  | 1.21  | 0.27  | 9.3E-03 | 1.26  | 0.34  | 1.1E-03 |
| Tbc1d16  | 25429 | 1.40  | 0.49  | 5.3E-04 | 1.35  | 0.43  | 2.6E-03 |
| Tbc1d2   | 253   | 2.95  | 1.56  | 1.4E-21 | 3.24  | 1.70  | 4.9E-25 |
| Tbc1d20  | 4949  | 1.41  | 0.50  | 4.8E-17 | 1.31  | 0.39  | 8.0E-11 |
| Tbc1d22a | 981   | -1.43 | -0.52 | 4.4E-12 | -1.40 | -0.49 | 1.1E-10 |
| Tbc1d24  | 9564  | 2.00  | 1.00  | 5.3E-12 | 2.11  | 1.08  | 7.6E-14 |
| Tbc1d2b  | 4400  | 1.71  | 0.77  | 4.0E-09 | 1.77  | 0.82  | 4.1E-10 |
| Tbc1d31  | 3810  | 2.35  | 1.23  | 1.3E-34 | 2.40  | 1.26  | 3.0E-36 |
| Tbc1d32  | 1172  | -1.53 | -0.61 | 1.1E-09 | -1.43 | -0.51 | 4.0E-07 |
| Tbc1d4   | 1461  | -1.37 | -0.46 | 7.0E-05 | -1.30 | -0.38 | 1.1E-03 |
| Tbc1d5   | 1509  | -1.60 | -0.68 | 6.8E-26 | -1.59 | -0.67 | 4.1E-25 |
| Tbc1d7   | 1095  | -2.06 | -1.04 | 2.0E-54 | -2.07 | -1.05 | 1.1E-55 |
| Tbc1d8   | 1328  | 1.74  | 0.80  | 4.4E-09 | 1.72  | 0.78  | 9.4E-09 |
| Tbc1d8b  | 1293  | 1.22  | 0.28  | 1.0E-02 | 1.37  | 0.45  | 2.6E-05 |
| Tbc1d9   | 7374  | -1.42 | -0.51 | 2.0E-03 | -1.42 | -0.50 | 2.3E-03 |
| Tbc1d9b  | 4080  | -1.79 | -0.84 | 9.7E-33 | -1.77 | -0.83 | 1.8E-31 |

|         |       |       |       |         |       |       |         |
|---------|-------|-------|-------|---------|-------|-------|---------|
| Tbcd    | 6672  | 1.34  | 0.43  | 4.7E-11 | 1.33  | 0.41  | 2.4E-10 |
| Tbce    | 4473  | -2.27 | -1.18 | 7.2E-41 | -2.16 | -1.11 | 4.1E-36 |
| Tbkbp1  | 2381  | -2.03 | -1.02 | 4.5E-10 | -1.96 | -0.97 | 3.1E-09 |
| Tbl1x   | 11400 | -1.64 | -0.72 | 2.6E-32 | -1.68 | -0.75 | 4.3E-35 |
| Tbl1xr1 | 4323  | -1.42 | -0.51 | 2.5E-07 | -1.57 | -0.65 | 2.4E-11 |
| Tbl2    | 4923  | 2.12  | 1.08  | 8.0E-42 | 2.10  | 1.07  | 8.8E-41 |
| Tbl3    | 4350  | 1.42  | 0.51  | 1.1E-05 | 1.29  | 0.37  | 1.7E-03 |
| Tbp     | 4856  | 1.26  | 0.34  | 1.6E-06 | 1.28  | 0.36  | 2.3E-07 |
| Tbr1    | 3672  | -2.68 | -1.42 | 2.6E-05 | -2.85 | -1.51 | 7.8E-06 |
| Tbx18   | 1274  | -1.50 | -0.58 | 6.7E-04 | -1.54 | -0.62 | 2.8E-04 |
| Tbx2    | 608   | -2.76 | -1.46 | 4.7E-03 | -2.92 | -1.55 | 2.8E-03 |
| Tbx22   | 155   | -4.84 | -2.27 | 3.4E-02 | -8.10 | -3.02 | 4.5E-03 |
| Tbx6    | 134   | 1.73  | 0.79  | 1.4E-04 | 1.92  | 0.94  | 4.9E-06 |
| Tcaf1   | 29441 | -1.33 | -0.42 | 2.9E-05 | -1.31 | -0.39 | 1.0E-04 |
| Tcaf2   | 1145  | 2.14  | 1.10  | 3.5E-09 | 2.23  | 1.16  | 4.5E-10 |
| Tcea2   | 1056  | -1.42 | -0.51 | 3.6E-06 | -1.47 | -0.56 | 3.6E-07 |
| Tceal1  | 996   | -1.82 | -0.86 | 6.2E-13 | -1.66 | -0.73 | 1.7E-09 |
| Tceal3  | 1740  | 1.34  | 0.42  | 4.1E-04 | 1.35  | 0.43  | 2.8E-04 |
| Tceal5  | 1149  | 2.01  | 1.00  | 2.3E-11 | 2.03  | 1.02  | 1.0E-11 |
| Tceal6  | 893   | 2.08  | 1.06  | 9.2E-08 | 2.22  | 1.15  | 5.8E-09 |
| Tceal8  | 4977  | -1.53 | -0.62 | 1.7E-11 | -1.45 | -0.54 | 5.4E-09 |
| Tceanc  | 839   | -1.32 | -0.41 | 2.9E-04 | -1.36 | -0.44 | 7.6E-05 |
| Tcf15   | 112   | 3.03  | 1.60  | 8.3E-13 | 2.79  | 1.48  | 5.0E-11 |
| Tcf19   | 3238  | 2.44  | 1.29  | 1.0E-17 | 2.27  | 1.19  | 3.7E-15 |
| Tcf3    | 10239 | -1.46 | -0.55 | 1.1E-04 | -1.65 | -0.72 | 2.5E-07 |
| Tcf4    | 24203 | -1.55 | -0.63 | 9.7E-07 | -1.48 | -0.56 | 1.4E-05 |
| Tcf7    | 1392  | 2.97  | 1.57  | 1.5E-35 | 2.65  | 1.41  | 8.8E-29 |
| Tcf7l2  | 10030 | -1.73 | -0.79 | 1.7E-02 | -2.47 | -1.30 | 5.4E-05 |
| Tcfl5   | 227   | 4.40  | 2.14  | 1.4E-37 | 4.61  | 2.21  | 6.2E-39 |
| Tchh    | 280   | 3.37  | 1.75  | 2.3E-32 | 3.13  | 1.65  | 1.3E-28 |
| Tchp    | 2927  | 1.64  | 0.72  | 4.3E-09 | 1.50  | 0.59  | 1.9E-06 |
| Tcirg1  | 1639  | 1.51  | 0.60  | 2.6E-03 | 1.58  | 0.66  | 7.7E-04 |
| Tcn2    | 1780  | 1.29  | 0.37  | 1.0E-02 | 1.30  | 0.38  | 9.7E-03 |
| Tcp11   | 255   | 3.60  | 1.85  | 5.0E-49 | 3.67  | 1.88  | 4.7E-50 |
| Tcp11l2 | 2118  | 2.96  | 1.56  | 4.7E-46 | 3.11  | 1.64  | 2.2E-50 |
| Tcta    | 1161  | -1.60 | -0.67 | 1.6E-17 | -1.61 | -0.68 | 7.3E-18 |
| Tcte2   | 326   | -1.56 | -0.64 | 2.0E-06 | -1.46 | -0.55 | 5.4E-05 |
| Tctn1   | 4106  | 1.47  | 0.55  | 1.8E-08 | 1.41  | 0.49  | 6.7E-07 |
| Tctn3   | 1997  | 1.94  | 0.96  | 6.3E-22 | 1.99  | 1.00  | 1.9E-23 |
| Tdg     | 9125  | -1.52 | -0.61 | 6.6E-09 | -1.65 | -0.73 | 2.4E-12 |
| Tdrd3   | 3615  | -1.74 | -0.80 | 2.8E-39 | -1.77 | -0.83 | 8.2E-42 |
| Tdrd6   | 284   | 5.62  | 2.49  | 7.3E-22 | 7.97  | 3.00  | 1.8E-30 |
| Tdrd7   | 2046  | 1.92  | 0.94  | 1.4E-30 | 1.93  | 0.95  | 8.3E-31 |
| Tdrd9   | 110   | -1.41 | -0.50 | 9.9E-03 | -1.41 | -0.49 | 1.0E-02 |
| Tdrkh   | 6712  | 1.38  | 0.47  | 3.2E-05 | 1.39  | 0.48  | 2.2E-05 |
| Tdrp    | 666   | 2.40  | 1.26  | 1.5E-32 | 2.01  | 1.01  | 3.0E-21 |
| Tead2   | 10451 | -2.19 | -1.13 | 2.5E-12 | -2.47 | -1.30 | 5.5E-16 |

|         |       |       |       |         |       |       |         |
|---------|-------|-------|-------|---------|-------|-------|---------|
| Tead3   | 3179  | 1.74  | 0.80  | 8.7E-10 | 1.69  | 0.75  | 6.8E-09 |
| Tec     | 603   | 1.95  | 0.96  | 1.6E-09 | 2.03  | 1.02  | 1.4E-10 |
| Tecpr1  | 6097  | 1.52  | 0.60  | 1.1E-05 | 1.48  | 0.56  | 4.3E-05 |
| Tecpr2  | 3397  | 1.26  | 0.33  | 1.6E-03 | 1.31  | 0.39  | 1.4E-04 |
| Tedc1   | 2765  | 1.89  | 0.92  | 5.2E-09 | 1.60  | 0.68  | 2.2E-05 |
| Tedc2   | 1770  | 1.42  | 0.51  | 1.5E-05 | 1.33  | 0.41  | 5.9E-04 |
| Tef     | 4931  | 1.35  | 0.43  | 6.2E-10 | 1.36  | 0.44  | 4.1E-10 |
| Tefm    | 624   | -1.55 | -0.63 | 8.6E-09 | -1.60 | -0.68 | 3.7E-10 |
| Tek     | 1451  | -1.54 | -0.62 | 3.8E-13 | -1.58 | -0.66 | 1.3E-14 |
| Tekt1   | 346   | 1.31  | 0.39  | 6.8E-04 | 1.61  | 0.69  | 8.4E-10 |
| Tekt2   | 414   | -1.39 | -0.48 | 1.4E-03 | -1.37 | -0.45 | 2.8E-03 |
| Telo2   | 2941  | -1.23 | -0.30 | 6.1E-05 | -1.28 | -0.35 | 1.2E-06 |
| Ten1    | 841   | -1.97 | -0.98 | 3.5E-44 | -2.02 | -1.01 | 5.6E-47 |
| Tent4b  | 7568  | 1.90  | 0.93  | 1.3E-35 | 1.91  | 0.94  | 2.4E-36 |
| Tent5b  | 139   | 8.14  | 3.03  | 5.0E-23 | 6.42  | 2.68  | 2.0E-18 |
| Tep1    | 820   | -1.91 | -0.94 | 1.1E-11 | -1.78 | -0.83 | 2.5E-09 |
| Tepsin  | 1722  | 1.43  | 0.52  | 6.7E-07 | 1.31  | 0.39  | 2.4E-04 |
| Terf1   | 1692  | -1.23 | -0.30 | 1.7E-02 | -1.26 | -0.33 | 7.5E-03 |
| Terf2ip | 4521  | 1.56  | 0.64  | 1.5E-18 | 1.49  | 0.57  | 5.1E-15 |
| Tert    | 1252  | -1.80 | -0.85 | 8.9E-21 | -1.83 | -0.87 | 9.5E-22 |
| Tesc    | 162   | 2.90  | 1.54  | 9.1E-05 | 2.75  | 1.46  | 2.2E-04 |
| Tesk2   | 871   | 2.79  | 1.48  | 4.2E-47 | 2.62  | 1.39  | 1.4E-41 |
| Tet2    | 6298  | -1.41 | -0.50 | 3.8E-05 | -1.30 | -0.38 | 2.0E-03 |
| Tet3    | 11236 | -1.39 | -0.48 | 1.7E-03 | -1.50 | -0.59 | 8.5E-05 |
| Tex10   | 5225  | 1.42  | 0.51  | 8.4E-07 | 1.46  | 0.55  | 7.7E-08 |
| Tex2    | 3136  | 1.83  | 0.87  | 8.5E-11 | 1.87  | 0.90  | 1.7E-11 |
| Tex261  | 4276  | 1.26  | 0.33  | 2.1E-06 | 1.22  | 0.29  | 4.0E-05 |
| Tex264  | 1405  | 1.32  | 0.40  | 2.0E-03 | 1.41  | 0.50  | 1.1E-04 |
| Tex30   | 1244  | 1.80  | 0.85  | 3.6E-08 | 1.80  | 0.85  | 3.7E-08 |
| Tex9    | 5404  | 1.50  | 0.58  | 5.3E-08 | 1.53  | 0.62  | 7.7E-09 |
| Tfap2a  | 954   | -1.85 | -0.89 | 2.8E-03 | -1.71 | -0.77 | 1.1E-02 |
| Tfap2b  | 7460  | -2.81 | -1.49 | 7.0E-09 | -2.51 | -1.33 | 2.8E-07 |
| Tfap2d  | 599   | -3.40 | -1.76 | 1.9E-07 | -3.22 | -1.69 | 6.4E-07 |
| Tfap4   | 800   | -1.69 | -0.76 | 1.8E-05 | -1.93 | -0.95 | 5.7E-08 |
| Tfcp2l1 | 356   | 5.44  | 2.44  | 1.6E-33 | 6.36  | 2.67  | 4.3E-39 |
| Tfe3    | 3803  | 1.90  | 0.92  | 1.7E-30 | 1.74  | 0.80  | 3.4E-23 |
| Tfeb    | 402   | 4.50  | 2.17  | 1.7E-31 | 4.30  | 2.11  | 1.3E-29 |
| Tfr2    | 490   | 3.16  | 1.66  | 3.4E-13 | 3.77  | 1.91  | 4.0E-17 |
| Tfrc    | 13483 | 1.24  | 0.31  | 3.9E-02 | 1.30  | 0.38  | 1.1E-02 |
| Tgfb1i1 | 1065  | -2.93 | -1.55 | 8.5E-11 | -3.25 | -1.70 | 9.1E-13 |
| Tgfb2   | 2234  | -2.52 | -1.33 | 4.1E-13 | -2.34 | -1.23 | 2.9E-11 |
| Tgfb3   | 1115  | -2.03 | -1.02 | 1.7E-04 | -1.96 | -0.97 | 4.0E-04 |
| Tgfbr2  | 1914  | -2.46 | -1.30 | 1.1E-11 | -2.46 | -1.30 | 1.1E-11 |
| Tgfbr3l | 409   | -1.45 | -0.54 | 2.0E-04 | -1.66 | -0.73 | 2.7E-07 |
| Tgif2   | 4559  | -1.21 | -0.28 | 3.3E-02 | -1.33 | -0.41 | 1.5E-03 |
| Tgm2    | 1296  | -1.33 | -0.41 | 2.9E-02 | -1.37 | -0.45 | 1.5E-02 |
| Tgoln1  | 7088  | 1.73  | 0.79  | 3.0E-12 | 1.82  | 0.87  | 1.4E-14 |

|          |       |       |       |         |       |       |         |
|----------|-------|-------|-------|---------|-------|-------|---------|
| Th       | 476   | -1.42 | -0.50 | 5.1E-03 | -1.52 | -0.61 | 6.6E-04 |
| Tha1     | 235   | 1.77  | 0.82  | 1.8E-06 | 1.45  | 0.53  | 2.6E-03 |
| Thap1    | 750   | -1.48 | -0.57 | 1.9E-06 | -1.54 | -0.62 | 1.4E-07 |
| Thap11   | 2637  | 1.40  | 0.49  | 7.1E-08 | 1.32  | 0.40  | 1.4E-05 |
| Thap2    | 3393  | -1.27 | -0.35 | 6.7E-06 | -1.23 | -0.30 | 1.1E-04 |
| Thap3    | 1000  | -1.25 | -0.33 | 1.8E-02 | -1.39 | -0.48 | 3.8E-04 |
| Thap4    | 1759  | 1.35  | 0.44  | 3.3E-12 | 1.28  | 0.35  | 3.2E-08 |
| Thap7    | 780   | -1.63 | -0.70 | 2.5E-14 | -1.66 | -0.73 | 2.5E-15 |
| Thbd     | 1311  | -1.57 | -0.65 | 2.5E-02 | -1.79 | -0.84 | 3.4E-03 |
| Thbs1    | 7121  | -1.91 | -0.93 | 1.8E-02 | -1.90 | -0.93 | 1.9E-02 |
| Thbs3    | 4764  | -1.30 | -0.38 | 3.1E-05 | -1.34 | -0.42 | 2.5E-06 |
| Them6    | 238   | 2.75  | 1.46  | 6.2E-27 | 2.55  | 1.35  | 5.8E-23 |
| Thgl1    | 1015  | -1.94 | -0.96 | 1.6E-12 | -2.16 | -1.11 | 2.3E-16 |
| Thnsl1   | 2243  | 1.45  | 0.54  | 2.0E-07 | 1.52  | 0.60  | 5.9E-09 |
| Thnsl2   | 150   | -1.33 | -0.41 | 2.2E-02 | -1.32 | -0.40 | 2.5E-02 |
| Thoc1    | 7063  | -1.34 | -0.42 | 1.4E-07 | -1.29 | -0.36 | 7.2E-06 |
| Thoc6    | 1517  | -1.43 | -0.52 | 1.9E-06 | -1.56 | -0.64 | 2.8E-09 |
| Thoc7    | 5327  | -1.49 | -0.58 | 2.5E-09 | -1.58 | -0.66 | 1.1E-11 |
| Thop1    | 4068  | 1.56  | 0.64  | 2.3E-10 | 1.46  | 0.55  | 8.6E-08 |
| Thpo     | 102   | 1.68  | 0.75  | 9.4E-07 | 1.62  | 0.70  | 7.5E-06 |
| Thsd4    | 2133  | -1.67 | -0.74 | 1.0E-07 | -1.47 | -0.56 | 7.3E-05 |
| Thtpa    | 821   | -1.29 | -0.37 | 1.1E-04 | -1.40 | -0.49 | 2.7E-07 |
| Thumpd2  | 586   | -1.34 | -0.42 | 3.8E-06 | -1.38 | -0.47 | 2.5E-07 |
| Thy1     | 176   | 2.63  | 1.39  | 3.3E-02 | 3.47  | 1.79  | 5.3E-03 |
| Tia1     | 23494 | -2.17 | -1.12 | 1.4E-17 | -1.92 | -0.94 | 9.8E-13 |
| Ticam1   | 491   | 1.80  | 0.85  | 8.4E-08 | 1.65  | 0.72  | 6.5E-06 |
| Ticrr    | 3962  | 1.53  | 0.62  | 3.3E-04 | 1.45  | 0.54  | 2.1E-03 |
| Tifa     | 328   | 1.41  | 0.50  | 3.0E-04 | 1.42  | 0.50  | 2.6E-04 |
| Tigar    | 2483  | 1.91  | 0.93  | 3.7E-22 | 1.79  | 0.84  | 2.6E-18 |
| Tigd5    | 857   | 1.51  | 0.59  | 7.7E-08 | 1.44  | 0.53  | 2.3E-06 |
| Timeless | 3945  | -1.52 | -0.60 | 4.4E-05 | -1.67 | -0.74 | 4.6E-07 |
| Timm10   | 972   | 1.27  | 0.35  | 2.4E-04 | 1.20  | 0.26  | 7.9E-03 |
| Timm13   | 2145  | -1.34 | -0.43 | 1.1E-05 | -1.40 | -0.49 | 4.6E-07 |
| Timm21   | 2194  | -1.69 | -0.76 | 1.4E-14 | -1.71 | -0.78 | 2.4E-15 |
| Timm44   | 3363  | -1.28 | -0.35 | 2.7E-09 | -1.36 | -0.44 | 5.5E-14 |
| Timm8a1  | 1048  | 1.38  | 0.47  | 5.1E-05 | 1.37  | 0.45  | 8.4E-05 |
| Timm9    | 2038  | 1.28  | 0.36  | 2.9E-07 | 1.28  | 0.36  | 4.2E-07 |
| Timmcdc1 | 2330  | 1.26  | 0.33  | 1.1E-04 | 1.17  | 0.22  | 1.3E-02 |
| Timp1    | 160   | -1.60 | -0.68 | 1.7E-02 | -2.05 | -1.03 | 1.9E-04 |
| Timp2    | 5730  | -1.69 | -0.76 | 1.6E-08 | -1.77 | -0.83 | 7.1E-10 |
| Tincr    | 434   | 2.42  | 1.28  | 1.4E-11 | 1.99  | 0.99  | 1.9E-07 |
| Tinf2    | 3256  | 1.45  | 0.54  | 1.4E-04 | 1.31  | 0.39  | 6.9E-03 |
| Tiparp   | 3539  | 1.73  | 0.79  | 5.6E-25 | 1.81  | 0.86  | 2.5E-29 |
| Tiprl    | 5126  | 1.29  | 0.37  | 2.0E-13 | 1.26  | 0.33  | 4.0E-11 |
| Tjp2     | 4312  | 1.53  | 0.62  | 3.6E-06 | 1.34  | 0.43  | 1.8E-03 |
| Tk1      | 2067  | -2.32 | -1.21 | 4.3E-13 | -2.54 | -1.35 | 7.3E-16 |
| Tk2      | 2477  | 1.46  | 0.54  | 3.4E-16 | 1.39  | 0.48  | 1.1E-12 |

|          |       |       |       |         |       |       |         |
|----------|-------|-------|-------|---------|-------|-------|---------|
| Tkfc     | 2031  | -1.33 | -0.41 | 3.4E-05 | -1.41 | -0.49 | 7.2E-07 |
| Tlcd1    | 692   | 2.04  | 1.03  | 1.3E-22 | 2.07  | 1.05  | 2.3E-23 |
| Tlcd2    | 162   | -1.96 | -0.97 | 7.5E-04 | -2.22 | -1.15 | 5.9E-05 |
| Tlcd3a   | 1830  | 1.33  | 0.41  | 1.2E-12 | 1.28  | 0.36  | 9.1E-10 |
| Tlcd5    | 2588  | 1.45  | 0.53  | 7.9E-17 | 1.38  | 0.46  | 4.8E-13 |
| Tle1     | 6244  | -1.29 | -0.37 | 1.1E-09 | -1.32 | -0.40 | 1.5E-11 |
| Tlk1     | 7690  | -1.45 | -0.53 | 1.3E-08 | -1.48 | -0.56 | 1.9E-09 |
| Tlk2     | 6144  | -1.42 | -0.50 | 1.2E-14 | -1.44 | -0.52 | 8.3E-16 |
| Tll1     | 321   | -1.80 | -0.85 | 2.7E-05 | -1.80 | -0.85 | 3.1E-05 |
| Tlr12    | 106   | -1.66 | -0.73 | 2.5E-03 | -1.54 | -0.62 | 1.1E-02 |
| Tlr3     | 167   | -1.75 | -0.81 | 1.2E-10 | -1.95 | -0.96 | 2.6E-14 |
| Tm2d1    | 1284  | -1.57 | -0.65 | 3.0E-10 | -1.54 | -0.63 | 1.7E-09 |
| Tm2d2    | 2855  | 1.50  | 0.59  | 3.6E-16 | 1.53  | 0.61  | 1.2E-17 |
| Tm4sf1   | 458   | -2.37 | -1.25 | 3.0E-11 | -2.28 | -1.19 | 2.3E-10 |
| Tm6sf2   | 365   | 1.78  | 0.83  | 4.1E-05 | 1.79  | 0.84  | 3.5E-05 |
| Tm9sf4   | 4866  | -1.34 | -0.42 | 2.6E-21 | -1.36 | -0.44 | 1.1E-23 |
| Tmbim1   | 479   | -2.36 | -1.24 | 2.4E-09 | -2.46 | -1.30 | 3.7E-10 |
| Tmbim4   | 1587  | 1.43  | 0.51  | 1.5E-07 | 1.39  | 0.48  | 1.4E-06 |
| Tmbim6   | 15557 | 1.28  | 0.36  | 3.2E-05 | 1.21  | 0.27  | 2.2E-03 |
| Tmc4     | 1438  | 3.08  | 1.62  | 2.6E-25 | 3.14  | 1.65  | 3.9E-26 |
| Tmc6     | 570   | 1.65  | 0.73  | 4.0E-03 | 1.65  | 0.72  | 4.3E-03 |
| Tmcc3    | 1229  | 1.53  | 0.61  | 4.4E-06 | 1.57  | 0.65  | 8.9E-07 |
| Tmco6    | 1031  | -1.23 | -0.30 | 1.8E-03 | -1.36 | -0.44 | 2.7E-06 |
| Tmed1    | 924   | -3.04 | -1.60 | 6.1E-38 | -3.00 | -1.59 | 3.3E-37 |
| Tmed2    | 8416  | 1.31  | 0.39  | 2.5E-06 | 1.26  | 0.34  | 6.9E-05 |
| Tmed3    | 1087  | -1.92 | -0.94 | 1.8E-16 | -1.85 | -0.89 | 9.4E-15 |
| Tmed5    | 3902  | 1.68  | 0.75  | 4.3E-11 | 1.63  | 0.70  | 6.5E-10 |
| Tmed8    | 4148  | 1.63  | 0.70  | 1.3E-14 | 1.81  | 0.86  | 4.7E-21 |
| Tmeff1   | 16520 | -1.31 | -0.39 | 9.2E-04 | -1.26 | -0.34 | 4.1E-03 |
| Tmem104  | 883   | 1.53  | 0.61  | 5.7E-08 | 1.44  | 0.52  | 4.0E-06 |
| Tmem106a | 133   | -1.43 | -0.52 | 6.2E-04 | -1.36 | -0.44 | 3.8E-03 |
| Tmem107  | 724   | 1.60  | 0.68  | 5.5E-09 | 1.49  | 0.57  | 1.1E-06 |
| Tmem108  | 1225  | 1.53  | 0.62  | 7.9E-06 | 1.37  | 0.45  | 1.4E-03 |
| Tmem109  | 1668  | -1.37 | -0.45 | 7.2E-05 | -1.49 | -0.58 | 3.1E-07 |
| Tmem115  | 2107  | 1.60  | 0.68  | 2.3E-14 | 1.56  | 0.64  | 7.2E-13 |
| Tmem119  | 865   | -2.30 | -1.20 | 1.1E-02 | -2.38 | -1.25 | 8.4E-03 |
| Tmem120a | 2053  | 2.25  | 1.17  | 4.1E-65 | 2.23  | 1.16  | 1.4E-63 |
| Tmem120b | 817   | 2.39  | 1.26  | 5.2E-32 | 2.54  | 1.35  | 1.6E-36 |
| Tmem121  | 963   | 2.43  | 1.28  | 1.5E-30 | 2.21  | 1.15  | 1.4E-24 |
| Tmem123  | 7806  | 1.55  | 0.63  | 1.6E-03 | 1.48  | 0.56  | 5.3E-03 |
| Tmem126a | 1475  | -1.29 | -0.36 | 1.2E-04 | -1.35 | -0.43 | 4.3E-06 |
| Tmem128  | 2360  | -1.28 | -0.35 | 3.9E-05 | -1.28 | -0.36 | 2.6E-05 |
| Tmem129  | 1905  | 1.58  | 0.66  | 1.7E-11 | 1.55  | 0.63  | 1.3E-10 |
| Tmem131l | 11569 | -1.30 | -0.37 | 9.3E-04 | -1.28 | -0.36 | 1.6E-03 |
| Tmem132a | 13999 | -1.26 | -0.33 | 2.6E-02 | -1.36 | -0.44 | 2.2E-03 |
| Tmem132e | 827   | 2.19  | 1.13  | 3.6E-07 | 2.41  | 1.27  | 1.0E-08 |
| Tmem135  | 2395  | 1.42  | 0.51  | 2.1E-13 | 1.41  | 0.50  | 5.7E-13 |

|            |       |       |       |         |       |       |         |
|------------|-------|-------|-------|---------|-------|-------|---------|
| Tmem138    | 1260  | -1.24 | -0.31 | 1.6E-03 | -1.32 | -0.40 | 4.3E-05 |
| Tmem141    | 325   | -1.53 | -0.61 | 1.2E-07 | -1.38 | -0.47 | 7.5E-05 |
| Tmem143    | 493   | -1.52 | -0.60 | 9.8E-08 | -1.44 | -0.53 | 3.9E-06 |
| Tmem144    | 224   | -1.37 | -0.45 | 2.0E-02 | -1.47 | -0.56 | 3.7E-03 |
| Tmem14a    | 285   | -3.62 | -1.86 | 5.0E-41 | -2.84 | -1.50 | 6.4E-28 |
| Tmem14c    | 3505  | 1.25  | 0.32  | 2.4E-04 | 1.19  | 0.25  | 5.4E-03 |
| Tmem150c   | 916   | -1.64 | -0.72 | 3.2E-03 | -1.60 | -0.68 | 5.4E-03 |
| Tmem151a   | 211   | 2.01  | 1.01  | 6.8E-05 | 1.86  | 0.89  | 4.7E-04 |
| Tmem151b   | 3587  | -1.45 | -0.54 | 2.4E-03 | -1.53 | -0.61 | 5.1E-04 |
| Tmem159    | 1138  | 2.65  | 1.41  | 1.3E-22 | 2.58  | 1.37  | 2.1E-21 |
| Tmem160    | 587   | 1.71  | 0.77  | 6.2E-14 | 1.60  | 0.68  | 4.7E-11 |
| Tmem161b   | 2984  | 1.42  | 0.50  | 1.9E-07 | 1.38  | 0.47  | 1.4E-06 |
| Tmem163    | 1496  | -1.62 | -0.69 | 1.4E-05 | -1.68 | -0.75 | 2.4E-06 |
| Tmem168    | 2511  | -1.59 | -0.67 | 2.6E-13 | -1.57 | -0.65 | 9.5E-13 |
| Tmem17     | 291   | -3.46 | -1.79 | 2.5E-33 | -3.28 | -1.71 | 9.2E-31 |
| Tmem170    | 1331  | 1.58  | 0.66  | 1.1E-11 | 1.48  | 0.57  | 6.0E-09 |
| Tmem170b   | 5482  | 1.28  | 0.35  | 2.5E-02 | 1.27  | 0.35  | 2.7E-02 |
| Tmem175    | 1180  | -1.70 | -0.77 | 2.3E-23 | -1.68 | -0.75 | 4.0E-22 |
| Tmem176b   | 2642  | -1.42 | -0.51 | 2.4E-07 | -1.38 | -0.47 | 2.6E-06 |
| Tmem178    | 919   | -1.79 | -0.84 | 4.5E-04 | -1.77 | -0.82 | 6.2E-04 |
| Tmem181a   | 3817  | 1.38  | 0.46  | 1.7E-19 | 1.41  | 0.50  | 1.3E-22 |
| Tmem183a   | 10585 | 1.26  | 0.33  | 2.0E-08 | 1.25  | 0.32  | 5.1E-08 |
| Tmem184b   | 4161  | 1.52  | 0.61  | 1.6E-07 | 1.48  | 0.56  | 1.3E-06 |
| Tmem184c   | 5364  | 1.57  | 0.65  | 8.6E-38 | 1.64  | 0.71  | 8.7E-46 |
| Tmem185b   | 922   | -1.86 | -0.89 | 1.9E-37 | -1.92 | -0.94 | 2.4E-41 |
| Tmem186    | 2246  | -1.44 | -0.52 | 1.1E-14 | -1.49 | -0.57 | 2.1E-17 |
| Tmem189    | 1696  | 2.27  | 1.18  | 8.8E-66 | 2.28  | 1.19  | 5.1E-66 |
| Tmem19     | 2803  | 1.46  | 0.55  | 2.7E-36 | 1.38  | 0.47  | 1.4E-26 |
| Tmem192    | 490   | 1.63  | 0.70  | 1.3E-10 | 1.68  | 0.75  | 8.2E-12 |
| Tmem198    | 1269  | 1.90  | 0.93  | 5.2E-09 | 1.81  | 0.85  | 8.3E-08 |
| Tmem200a   | 1466  | -2.26 | -1.17 | 3.1E-18 | -2.42 | -1.28 | 2.3E-21 |
| Tmem209    | 3624  | -1.62 | -0.69 | 1.1E-14 | -1.61 | -0.69 | 2.0E-14 |
| Tmem218    | 1080  | 1.54  | 0.62  | 1.0E-07 | 1.56  | 0.64  | 3.2E-08 |
| Tmem223    | 2143  | -1.94 | -0.95 | 1.8E-19 | -1.86 | -0.89 | 3.7E-17 |
| Tmem229a   | 328   | -1.93 | -0.95 | 2.0E-08 | -1.84 | -0.88 | 2.0E-07 |
| Tmem230    | 1607  | -1.70 | -0.77 | 5.8E-28 | -1.66 | -0.73 | 2.8E-25 |
| Tmem231    | 1605  | 1.41  | 0.50  | 3.6E-08 | 1.29  | 0.37  | 6.4E-05 |
| Tmem241    | 646   | 1.49  | 0.57  | 1.3E-07 | 1.54  | 0.63  | 7.3E-09 |
| Tmem242    | 3130  | -1.26 | -0.34 | 9.9E-04 | -1.31 | -0.39 | 1.3E-04 |
| Tmem243    | 590   | 2.02  | 1.02  | 2.3E-14 | 2.02  | 1.01  | 3.2E-14 |
| Tmem245    | 7677  | 1.27  | 0.34  | 1.9E-02 | 1.47  | 0.56  | 9.3E-05 |
| Tmem25     | 503   | 1.33  | 0.41  | 1.9E-03 | 1.39  | 0.48  | 3.2E-04 |
| Tmem250-ps | 1407  | -1.87 | -0.91 | 8.9E-25 | -2.05 | -1.04 | 4.2E-32 |
| Tmem256    | 2625  | 1.31  | 0.39  | 3.3E-03 | 1.28  | 0.35  | 8.1E-03 |
| Tmem259    | 5207  | 1.25  | 0.32  | 7.9E-04 | 1.19  | 0.25  | 1.0E-02 |
| Tmem263    | 5944  | 1.54  | 0.62  | 1.4E-15 | 1.50  | 0.58  | 8.1E-14 |
| Tmem266    | 344   | 1.92  | 0.94  | 1.2E-09 | 1.79  | 0.84  | 7.9E-08 |



|           |       |       |       |          |       |       |          |
|-----------|-------|-------|-------|----------|-------|-------|----------|
| Tmem269   | 149   | 3.84  | 1.94  | 1.4E-24  | 4.45  | 2.15  | 2.6E-29  |
| Tmem28    | 1042  | 2.08  | 1.06  | 1.3E-12  | 1.85  | 0.89  | 3.5E-09  |
| Tmem29    | 1659  | -1.77 | -0.82 | 1.8E-11  | -1.57 | -0.65 | 1.3E-07  |
| Tmem30a   | 13736 | 1.29  | 0.36  | 6.8E-05  | 1.35  | 0.43  | 1.6E-06  |
| Tmem38a   | 1566  | 1.67  | 0.74  | 2.7E-10  | 1.69  | 0.75  | 1.6E-10  |
| Tmem38b   | 1178  | 1.89  | 0.92  | 1.0E-19  | 1.73  | 0.79  | 6.8E-15  |
| Tmem39a   | 2452  | -1.44 | -0.52 | 2.8E-08  | -1.39 | -0.47 | 7.4E-07  |
| Tmem39b   | 1217  | -2.03 | -1.02 | 9.6E-28  | -2.26 | -1.18 | 2.6E-36  |
| Tmem41a   | 1127  | 2.05  | 1.03  | 5.9E-68  | 2.06  | 1.04  | 2.0E-68  |
| Tmem41b   | 3997  | 1.41  | 0.50  | 4.2E-08  | 1.47  | 0.56  | 6.7E-10  |
| Tmem42    | 124   | -3.49 | -1.80 | 1.5E-32  | -4.20 | -2.07 | 5.9E-41  |
| Tmem43    | 4788  | 1.26  | 0.33  | 1.8E-06  | 1.16  | 0.21  | 3.4E-03  |
| Tmem44    | 5837  | -2.26 | -1.18 | 4.5E-09  | -2.18 | -1.12 | 2.7E-08  |
| Tmem45a   | 330   | -1.94 | -0.95 | 1.5E-03  | -1.73 | -0.79 | 9.8E-03  |
| Tmem50a   | 4115  | 1.35  | 0.43  | 1.2E-17  | 1.31  | 0.38  | 2.7E-14  |
| Tmem50b   | 4482  | 2.93  | 1.55  | 1.0E-167 | 2.98  | 1.58  | 3.3E-173 |
| Tmem60    | 1396  | 1.44  | 0.52  | 8.9E-09  | 1.51  | 0.59  | 7.3E-11  |
| Tmem62    | 474   | -2.40 | -1.26 | 3.9E-18  | -2.11 | -1.08 | 1.4E-13  |
| Tmem64    | 3264  | 1.33  | 0.41  | 2.4E-02  | 1.36  | 0.44  | 1.4E-02  |
| Tmem68    | 2272  | -1.88 | -0.91 | 1.9E-24  | -1.83 | -0.87 | 1.6E-22  |
| Tmem69    | 1429  | -1.30 | -0.38 | 9.8E-05  | -1.28 | -0.35 | 2.8E-04  |
| Tmem74    | 805   | 1.44  | 0.52  | 5.6E-03  | 1.64  | 0.71  | 1.2E-04  |
| Tmem74b   | 367   | -2.35 | -1.23 | 2.8E-05  | -2.31 | -1.21 | 4.3E-05  |
| Tmem80    | 1603  | -2.48 | -1.31 | 2.3E-41  | -2.66 | -1.41 | 1.1E-47  |
| Tmem94    | 3930  | -1.81 | -0.85 | 2.5E-12  | -1.94 | -0.96 | 2.7E-15  |
| Tmem98    | 1432  | -2.20 | -1.14 | 7.8E-12  | -2.45 | -1.29 | 7.2E-15  |
| Tmod3     | 11387 | 1.69  | 0.76  | 3.3E-27  | 1.75  | 0.80  | 2.4E-30  |
| Tmpo      | 33304 | -1.49 | -0.57 | 3.8E-07  | -1.56 | -0.64 | 1.4E-08  |
| Tmppe     | 504   | 1.43  | 0.51  | 2.4E-04  | 1.42  | 0.51  | 3.1E-04  |
| Tmprss5   | 115   | -1.93 | -0.95 | 1.0E-11  | -1.85 | -0.89 | 2.2E-10  |
| Tmprss7   | 133   | 1.33  | 0.41  | 2.4E-02  | 1.48  | 0.57  | 1.4E-03  |
| Tmtc3     | 4476  | 1.24  | 0.31  | 6.0E-03  | 1.31  | 0.39  | 3.9E-04  |
| Tmub1     | 805   | 1.24  | 0.31  | 4.1E-04  | 1.25  | 0.33  | 2.6E-04  |
| Tnc       | 5966  | -2.21 | -1.14 | 2.4E-03  | -2.33 | -1.22 | 1.2E-03  |
| Tnfaip3   | 379   | 1.47  | 0.56  | 2.1E-04  | 1.59  | 0.67  | 7.2E-06  |
| Tnfaip8l1 | 579   | 1.50  | 0.59  | 8.8E-09  | 1.72  | 0.78  | 1.4E-14  |
| Tnfrsf10b | 720   | 2.16  | 1.11  | 2.0E-07  | 2.24  | 1.16  | 4.9E-08  |
| Tnfrsf12a | 297   | 4.65  | 2.22  | 1.9E-26  | 5.05  | 2.34  | 7.9E-29  |
| Tnfrsf1a  | 1675  | 1.39  | 0.48  | 4.8E-03  | 1.36  | 0.44  | 9.7E-03  |
| Tnfrsf22  | 910   | 1.93  | 0.95  | 1.0E-12  | 1.78  | 0.83  | 4.5E-10  |
| Tnfrsf23  | 150   | 2.41  | 1.27  | 9.3E-10  | 2.73  | 1.45  | 2.6E-12  |
| Tnfrsf25  | 334   | 1.85  | 0.89  | 1.3E-05  | 1.91  | 0.93  | 4.3E-06  |
| Tnfsf9    | 235   | 1.61  | 0.69  | 1.6E-06  | 1.65  | 0.72  | 6.0E-07  |
| Tnip1     | 891   | -1.47 | -0.56 | 9.3E-06  | -1.42 | -0.51 | 6.2E-05  |
| Tnip2     | 620   | 1.74  | 0.80  | 3.4E-17  | 1.65  | 0.72  | 3.4E-14  |
| Tnk2      | 7612  | 1.43  | 0.52  | 1.6E-04  | 1.32  | 0.41  | 3.8E-03  |
| Tnks1bp1  | 7812  | 1.39  | 0.47  | 1.9E-06  | 1.38  | 0.46  | 3.4E-06  |

|          |       |        |       |         |       |       |         |
|----------|-------|--------|-------|---------|-------|-------|---------|
| Tnnc1    | 242   | -7.62  | -2.93 | 6.2E-04 | -5.15 | -2.37 | 6.8E-03 |
| Tnni1    | 196   | -15.77 | -3.98 | 3.2E-04 | -8.98 | -3.17 | 5.0E-03 |
| Tnni3    | 499   | 5.18   | 2.37  | 7.1E-32 | 4.15  | 2.05  | 4.3E-24 |
| Tnnt1    | 415   | -4.83  | -2.27 | 5.6E-04 | -3.03 | -1.60 | 1.8E-02 |
| Tnnt2    | 197   | -15.34 | -3.94 | 2.4E-04 | -9.35 | -3.22 | 3.1E-03 |
| Tnnt3    | 136   | -12.07 | -3.59 | 3.7E-05 | -7.48 | -2.90 | 1.1E-03 |
| Tnrc18   | 15512 | -2.32  | -1.21 | 4.4E-15 | -2.46 | -1.30 | 4.6E-17 |
| Tnrc6a   | 14170 | -1.40  | -0.49 | 9.5E-08 | -1.26 | -0.34 | 3.3E-04 |
| Tnrc6b   | 8717  | -1.41  | -0.49 | 1.8E-06 | -1.32 | -0.40 | 1.3E-04 |
| Tns1     | 4010  | -1.62  | -0.70 | 7.5E-06 | -1.54 | -0.63 | 6.4E-05 |
| Tns2     | 1379  | -3.34  | -1.74 | 4.5E-19 | -3.35 | -1.74 | 3.7E-19 |
| Tns3     | 4656  | -2.53  | -1.34 | 1.0E-13 | -2.40 | -1.26 | 2.6E-12 |
| Tob2     | 2108  | 1.45   | 0.54  | 2.1E-04 | 1.33  | 0.41  | 6.1E-03 |
| Toe1     | 1228  | -1.74  | -0.80 | 2.8E-21 | -1.88 | -0.91 | 2.7E-27 |
| Togaram1 | 4769  | 1.31   | 0.39  | 5.1E-06 | 1.44  | 0.53  | 6.0E-10 |
| Tom1     | 557   | 1.48   | 0.57  | 4.3E-06 | 1.40  | 0.49  | 9.4E-05 |
| Tom1l2   | 7710  | 1.84   | 0.88  | 3.2E-15 | 1.95  | 0.97  | 5.5E-18 |
| Tomm20   | 10877 | 1.27   | 0.34  | 1.2E-05 | 1.26  | 0.33  | 2.3E-05 |
| Tomm34   | 2832  | 1.40   | 0.49  | 1.7E-11 | 1.36  | 0.44  | 1.3E-09 |
| Tomm40   | 3723  | 1.34   | 0.42  | 9.8E-05 | 1.25  | 0.32  | 4.0E-03 |
| Tomm40l  | 2031  | -1.30  | -0.38 | 1.1E-10 | -1.32 | -0.40 | 6.7E-12 |
| Top3a    | 2357  | 1.71   | 0.77  | 1.3E-20 | 1.66  | 0.73  | 1.2E-18 |
| Top3b    | 3624  | -1.49  | -0.58 | 1.6E-43 | -1.49 | -0.58 | 2.3E-43 |
| Topors   | 4472  | -1.36  | -0.45 | 7.6E-12 | -1.38 | -0.47 | 8.7E-13 |
| Tor1aip1 | 2580  | -2.27  | -1.18 | 2.9E-46 | -2.28 | -1.19 | 6.6E-47 |
| Tor2a    | 1529  | -1.47  | -0.56 | 9.6E-15 | -1.47 | -0.56 | 9.5E-15 |
| Tor3a    | 472   | 2.04   | 1.03  | 6.1E-18 | 2.07  | 1.05  | 1.2E-18 |
| Tox      | 2097  | -2.62  | -1.39 | 2.5E-31 | -2.82 | -1.50 | 3.1E-36 |
| Tox2     | 2504  | 2.01   | 1.01  | 1.9E-10 | 1.60  | 0.68  | 2.5E-05 |
| Tox3     | 4651  | -1.50  | -0.59 | 9.0E-04 | -1.67 | -0.74 | 2.1E-05 |
| Tox4     | 9426  | 1.40   | 0.49  | 6.6E-24 | 1.37  | 0.46  | 5.0E-21 |
| Tpcn1    | 4301  | 1.64   | 0.71  | 3.0E-08 | 1.63  | 0.71  | 4.1E-08 |
| Tpgs1    | 646   | -2.39  | -1.26 | 1.8E-26 | -2.51 | -1.33 | 4.0E-29 |
| Tpgs2    | 5489  | 1.27   | 0.34  | 6.3E-06 | 1.31  | 0.38  | 4.0E-07 |
| Tpk1     | 309   | -2.19  | -1.13 | 1.9E-08 | -2.07 | -1.05 | 2.2E-07 |
| Tpm4     | 20925 | -1.48  | -0.57 | 5.3E-04 | -1.57 | -0.65 | 7.1E-05 |
| Tpmt     | 2079  | 1.82   | 0.86  | 3.8E-15 | 1.80  | 0.85  | 1.3E-14 |
| Tpp2     | 10807 | 1.47   | 0.55  | 1.8E-09 | 1.52  | 0.61  | 3.6E-11 |
| Tppp     | 1479  | 2.03   | 1.02  | 2.9E-18 | 2.19  | 1.13  | 3.2E-22 |
| Tpra1    | 1797  | 1.36   | 0.44  | 1.3E-07 | 1.38  | 0.46  | 3.1E-08 |
| Tprkb    | 1978  | -1.24  | -0.31 | 1.5E-05 | -1.32 | -0.40 | 2.0E-08 |
| Tprn     | 719   | 1.84   | 0.88  | 2.4E-15 | 1.72  | 0.79  | 2.1E-12 |
| Tpst1    | 1950  | -1.28  | -0.36 | 1.0E-07 | -1.32 | -0.40 | 1.9E-09 |
| Tpst2    | 1187  | 2.20   | 1.14  | 9.6E-27 | 2.00  | 1.00  | 6.5E-21 |
| Tra2b    | 21745 | -1.19  | -0.25 | 1.5E-02 | -1.25 | -0.33 | 1.3E-03 |
| Trabd    | 3320  | 1.41   | 0.49  | 9.7E-07 | 1.30  | 0.38  | 2.5E-04 |
| Trabd2b  | 672   | -2.05  | -1.04 | 1.1E-05 | -2.03 | -1.02 | 1.6E-05 |

|          |       |       |       |         |       |       |         |
|----------|-------|-------|-------|---------|-------|-------|---------|
| Tradd    | 444   | 2.26  | 1.17  | 2.6E-21 | 1.99  | 0.99  | 1.4E-15 |
| Traf3    | 7313  | 1.40  | 0.49  | 1.2E-07 | 1.45  | 0.53  | 7.0E-09 |
| Traf3ip1 | 2398  | 1.34  | 0.43  | 1.1E-04 | 1.19  | 0.24  | 3.4E-02 |
| Traf4    | 5983  | -1.48 | -0.56 | 2.9E-14 | -1.54 | -0.63 | 2.0E-17 |
| Traf6    | 4656  | 1.46  | 0.55  | 2.5E-07 | 1.53  | 0.61  | 6.7E-09 |
| Traf7    | 9194  | 1.42  | 0.51  | 3.8E-11 | 1.32  | 0.41  | 1.8E-07 |
| Trafd1   | 7127  | 1.28  | 0.36  | 1.1E-07 | 1.24  | 0.31  | 4.3E-06 |
| Trak1    | 8329  | 1.32  | 0.40  | 8.7E-03 | 1.25  | 0.32  | 4.3E-02 |
| Tram2    | 2411  | 1.75  | 0.80  | 2.1E-08 | 1.77  | 0.83  | 8.3E-09 |
| Trappc1  | 5418  | 1.37  | 0.45  | 1.5E-06 | 1.37  | 0.45  | 1.5E-06 |
| Trappc11 | 7708  | 1.50  | 0.59  | 1.7E-15 | 1.55  | 0.63  | 1.0E-17 |
| Trappc12 | 3137  | -1.27 | -0.35 | 3.9E-12 | -1.26 | -0.33 | 4.2E-11 |
| Trappc14 | 4197  | 1.32  | 0.40  | 5.2E-04 | 1.25  | 0.32  | 6.1E-03 |
| Trappc6b | 2765  | -1.19 | -0.24 | 1.6E-02 | -1.27 | -0.34 | 6.3E-04 |
| Triap1   | 1459  | 1.50  | 0.59  | 2.5E-08 | 1.28  | 0.35  | 1.1E-03 |
| Trib2    | 8489  | -1.73 | -0.79 | 3.2E-07 | -1.73 | -0.79 | 3.4E-07 |
| Tril     | 2635  | -2.05 | -1.03 | 2.2E-04 | -2.28 | -1.19 | 1.7E-05 |
| Trim11   | 2350  | 1.42  | 0.50  | 2.2E-08 | 1.32  | 0.40  | 1.3E-05 |
| Trim12a  | 257   | -1.79 | -0.84 | 1.3E-03 | -1.55 | -0.63 | 1.9E-02 |
| Trim16   | 549   | -1.63 | -0.70 | 2.8E-05 | -1.44 | -0.53 | 2.1E-03 |
| Trim17   | 137   | 1.91  | 0.93  | 3.0E-03 | 2.14  | 1.10  | 4.6E-04 |
| Trim21   | 244   | -1.57 | -0.65 | 3.2E-04 | -1.57 | -0.65 | 3.9E-04 |
| Trim24   | 7933  | -1.57 | -0.65 | 2.7E-15 | -1.60 | -0.68 | 1.1E-16 |
| Trim27   | 5638  | 1.32  | 0.40  | 2.1E-05 | 1.22  | 0.29  | 2.8E-03 |
| Trim3    | 4883  | 1.35  | 0.43  | 3.0E-05 | 1.36  | 0.44  | 2.2E-05 |
| Trim30a  | 122   | -1.75 | -0.80 | 1.9E-04 | -1.56 | -0.64 | 3.3E-03 |
| Trim33   | 11213 | -1.29 | -0.37 | 6.9E-05 | -1.24 | -0.31 | 9.5E-04 |
| Trim34a  | 103   | -2.69 | -1.43 | 8.2E-12 | -2.83 | -1.50 | 3.5E-13 |
| Trim37   | 17170 | 1.40  | 0.48  | 1.0E-09 | 1.38  | 0.46  | 5.4E-09 |
| Trim39   | 4419  | -1.84 | -0.88 | 1.1E-26 | -1.83 | -0.87 | 3.2E-26 |
| Trim41   | 4917  | -1.25 | -0.32 | 2.7E-03 | -1.35 | -0.43 | 3.2E-05 |
| Trim56   | 1628  | -1.49 | -0.58 | 7.3E-08 | -1.45 | -0.54 | 5.6E-07 |
| Trim59   | 8176  | -1.32 | -0.40 | 8.7E-03 | -1.44 | -0.52 | 4.2E-04 |
| Trim6    | 158   | 2.30  | 1.20  | 7.4E-04 | 1.74  | 0.80  | 3.0E-02 |
| Trim62   | 3421  | 2.11  | 1.08  | 3.4E-23 | 2.13  | 1.09  | 8.0E-24 |
| Trim65   | 221   | -2.00 | -1.00 | 4.2E-09 | -2.39 | -1.26 | 1.4E-13 |
| Trim68   | 784   | -1.43 | -0.52 | 8.8E-05 | -1.35 | -0.44 | 1.2E-03 |
| Trim71   | 313   | 2.10  | 1.07  | 2.4E-03 | 1.66  | 0.73  | 4.5E-02 |
| Trim8    | 3106  | -1.76 | -0.82 | 4.6E-08 | -2.04 | -1.03 | 3.6E-12 |
| Trim9    | 4582  | 1.38  | 0.46  | 2.5E-02 | 1.44  | 0.53  | 9.5E-03 |
| Triobp   | 5590  | 1.48  | 0.56  | 6.3E-06 | 1.39  | 0.47  | 1.8E-04 |
| Trip10   | 2161  | 2.56  | 1.36  | 3.9E-39 | 2.36  | 1.24  | 8.8E-33 |
| Trip11   | 4453  | -1.40 | -0.48 | 5.4E-06 | -1.32 | -0.40 | 2.3E-04 |
| Trip13   | 1751  | -1.35 | -0.43 | 3.6E-02 | -1.53 | -0.62 | 2.4E-03 |
| Trmo     | 251   | -2.34 | -1.22 | 9.0E-22 | -2.81 | -1.49 | 1.3E-31 |
| Trmt1    | 4627  | 1.42  | 0.51  | 1.1E-13 | 1.40  | 0.49  | 1.4E-12 |
| Trmt10a  | 1019  | -1.95 | -0.96 | 6.1E-16 | -2.11 | -1.07 | 1.8E-19 |

|           |       |       |       |         |       |       |         |
|-----------|-------|-------|-------|---------|-------|-------|---------|
| Trmt112   | 2004  | -1.29 | -0.37 | 9.3E-03 | -1.45 | -0.54 | 9.6E-05 |
| Trmt12    | 1120  | 1.39  | 0.47  | 2.0E-09 | 1.37  | 0.45  | 1.1E-08 |
| Trmt2b    | 1075  | 1.28  | 0.35  | 2.3E-04 | 1.31  | 0.39  | 6.1E-05 |
| Trmt9b    | 450   | 1.87  | 0.91  | 2.1E-22 | 1.85  | 0.89  | 2.5E-21 |
| Trmu      | 1510  | -1.21 | -0.27 | 1.5E-04 | -1.28 | -0.36 | 5.1E-07 |
| Trnp1     | 298   | 1.45  | 0.53  | 3.8E-02 | 1.55  | 0.63  | 1.4E-02 |
| Trp53bp2  | 6157  | 1.32  | 0.40  | 2.4E-07 | 1.29  | 0.37  | 1.4E-06 |
| Trp53i13  | 1053  | 1.89  | 0.92  | 3.2E-11 | 1.74  | 0.80  | 1.3E-08 |
| Trp53inp1 | 9855  | 1.38  | 0.46  | 3.8E-06 | 1.54  | 0.62  | 3.0E-10 |
| Trp53inp2 | 13213 | -1.55 | -0.64 | 3.1E-09 | -1.54 | -0.62 | 7.7E-09 |
| Trp53rkb  | 706   | 1.37  | 0.46  | 1.4E-09 | 1.29  | 0.37  | 1.2E-06 |
| Trp73     | 821   | -1.48 | -0.56 | 7.6E-03 | -1.67 | -0.74 | 3.5E-04 |
| Trpc1     | 1254  | 1.72  | 0.78  | 8.0E-23 | 1.79  | 0.84  | 3.1E-26 |
| Trpc3     | 522   | -1.35 | -0.43 | 2.0E-03 | -1.48 | -0.56 | 4.7E-05 |
| Trpm3     | 2849  | -2.05 | -1.04 | 9.6E-05 | -1.72 | -0.78 | 4.1E-03 |
| Trpm4     | 1776  | 2.04  | 1.03  | 1.2E-15 | 2.11  | 1.08  | 5.0E-17 |
| Trpm5     | 237   | -6.18 | -2.63 | 7.6E-09 | -5.06 | -2.34 | 3.2E-07 |
| Trps1     | 3348  | -1.81 | -0.86 | 1.8E-06 | -1.65 | -0.72 | 7.2E-05 |
| Trpv2     | 487   | -1.91 | -0.93 | 7.6E-10 | -2.03 | -1.02 | 1.5E-11 |
| Trrap     | 17379 | -1.49 | -0.57 | 2.6E-06 | -1.36 | -0.45 | 3.2E-04 |
| Trub2     | 2831  | -1.39 | -0.47 | 2.8E-06 | -1.37 | -0.45 | 7.9E-06 |
| Tsc2      | 11894 | 1.25  | 0.32  | 9.6E-04 | 1.25  | 0.32  | 8.7E-04 |
| Tsc22d1   | 30581 | -1.45 | -0.54 | 9.7E-26 | -1.48 | -0.56 | 6.7E-28 |
| Tsc22d2   | 6615  | 1.55  | 0.63  | 1.6E-08 | 1.48  | 0.57  | 4.7E-07 |
| Tsc22d3   | 2483  | -1.51 | -0.60 | 3.0E-11 | -1.51 | -0.59 | 3.5E-11 |
| Tsen2     | 1122  | -1.51 | -0.60 | 1.9E-17 | -1.53 | -0.61 | 5.9E-18 |
| Tsen34    | 5496  | 1.37  | 0.46  | 4.3E-10 | 1.29  | 0.37  | 5.9E-07 |
| Tsen54    | 1528  | 1.78  | 0.83  | 1.5E-28 | 1.64  | 0.71  | 4.9E-21 |
| Tsfm      | 1548  | 1.38  | 0.46  | 9.7E-05 | 1.20  | 0.27  | 3.2E-02 |
| Tsga10    | 2471  | -1.50 | -0.59 | 1.0E-09 | -1.38 | -0.47 | 1.4E-06 |
| Tshr      | 132   | 2.25  | 1.17  | 2.0E-04 | 2.49  | 1.32  | 2.8E-05 |
| Tshz3     | 1699  | 1.28  | 0.35  | 4.1E-02 | 1.43  | 0.52  | 2.1E-03 |
| Tspan11   | 1093  | -2.22 | -1.15 | 4.0E-17 | -2.03 | -1.02 | 1.3E-13 |
| Tspan15   | 1298  | 2.50  | 1.32  | 1.7E-98 | 2.40  | 1.26  | 4.1E-90 |
| Tspan17   | 1100  | 2.74  | 1.46  | 6.1E-25 | 2.80  | 1.49  | 7.2E-26 |
| Tspan18   | 4519  | -1.45 | -0.54 | 9.2E-06 | -1.61 | -0.69 | 1.1E-08 |
| Tspan2    | 1531  | 1.68  | 0.75  | 6.1E-16 | 1.73  | 0.79  | 1.7E-17 |
| Tspan33   | 946   | 3.61  | 1.85  | 1.8E-36 | 2.97  | 1.57  | 1.5E-26 |
| Tspan4    | 996   | 1.40  | 0.49  | 1.0E-03 | 1.36  | 0.45  | 2.8E-03 |
| Tspyl1    | 10650 | 1.57  | 0.65  | 3.3E-22 | 1.53  | 0.61  | 1.2E-19 |
| Tspyl3    | 916   | -1.76 | -0.81 | 1.3E-05 | -1.94 | -0.96 | 2.2E-07 |
| Tspyl4    | 13508 | 1.37  | 0.45  | 2.1E-03 | 1.46  | 0.54  | 1.8E-04 |
| Tspyl5    | 1666  | 1.34  | 0.43  | 5.8E-03 | 1.31  | 0.39  | 1.3E-02 |
| Tssk4     | 155   | 1.28  | 0.35  | 1.1E-02 | 1.39  | 0.47  | 7.0E-04 |
| Tst       | 418   | 1.41  | 0.49  | 1.3E-03 | 1.48  | 0.56  | 2.0E-04 |
| Ttbk1     | 6304  | 1.51  | 0.59  | 4.6E-03 | 1.37  | 0.45  | 3.6E-02 |
| Ttbk2     | 10775 | 1.63  | 0.70  | 1.2E-07 | 1.75  | 0.81  | 1.1E-09 |

|         |        |        |       |         |       |       |         |
|---------|--------|--------|-------|---------|-------|-------|---------|
| Ttc1    | 3512   | 1.31   | 0.39  | 3.6E-12 | 1.31  | 0.38  | 6.8E-12 |
| Ttc12   | 481    | 1.63   | 0.71  | 1.0E-06 | 1.63  | 0.71  | 1.1E-06 |
| Ttc16   | 131    | 1.98   | 0.99  | 3.1E-07 | 2.19  | 1.13  | 4.2E-09 |
| Ttc17   | 2560   | -1.32  | -0.40 | 9.2E-06 | -1.27 | -0.35 | 1.4E-04 |
| Ttc19   | 2326   | 1.28   | 0.36  | 7.6E-03 | 1.45  | 0.54  | 3.3E-05 |
| Ttc21b  | 3707   | 1.89   | 0.92  | 1.1E-29 | 2.01  | 1.01  | 1.4E-35 |
| Ttc26   | 2246   | 1.49   | 0.57  | 9.4E-13 | 1.52  | 0.61  | 4.3E-14 |
| Ttc30a2 | 100    | 1.68   | 0.75  | 1.2E-06 | 2.10  | 1.07  | 1.4E-12 |
| Ttc32   | 289    | -3.76  | -1.91 | 1.4E-43 | -3.36 | -1.75 | 2.4E-36 |
| Ttc37   | 4684   | 1.43   | 0.51  | 6.4E-06 | 1.67  | 0.74  | 5.4E-11 |
| Ttc39b  | 1769   | 1.41   | 0.49  | 1.5E-02 | 1.63  | 0.71  | 3.8E-04 |
| Ttc39c  | 964    | -1.34  | -0.42 | 8.9E-06 | -1.41 | -0.49 | 1.4E-07 |
| Ttc41   | 330    | -2.20  | -1.14 | 3.6E-24 | -1.99 | -0.99 | 1.4E-18 |
| Ttc6    | 196    | -1.49  | -0.58 | 2.6E-03 | -1.40 | -0.48 | 1.3E-02 |
| Ttc7    | 821    | 2.85   | 1.51  | 1.6E-25 | 2.84  | 1.50  | 2.6E-25 |
| Ttc7b   | 1617   | -1.60  | -0.67 | 6.4E-26 | -1.75 | -0.81 | 1.3E-36 |
| Ttf2    | 3923   | 1.40   | 0.49  | 9.7E-04 | 1.32  | 0.40  | 8.2E-03 |
| Tti1    | 2683   | -1.45  | -0.54 | 8.8E-11 | -1.48 | -0.56 | 8.0E-12 |
| Ttll11  | 336    | 1.56   | 0.64  | 3.4E-08 | 1.55  | 0.64  | 6.5E-08 |
| Ttll12  | 4809   | 1.40   | 0.49  | 2.1E-09 | 1.36  | 0.44  | 6.7E-08 |
| Ttll3   | 1166   | 1.44   | 0.53  | 5.3E-05 | 1.47  | 0.56  | 2.0E-05 |
| Ttll7   | 4198   | 1.68   | 0.75  | 8.9E-05 | 2.23  | 1.16  | 6.0E-10 |
| Ttn     | 914    | -15.26 | -3.93 | 1.8E-03 | -8.61 | -3.11 | 1.6E-02 |
| Ttpa    | 169    | -1.77  | -0.82 | 4.3E-03 | -1.76 | -0.81 | 5.2E-03 |
| Ttpal   | 5297   | -1.28  | -0.36 | 3.0E-16 | -1.30 | -0.38 | 1.3E-17 |
| Ttyh1   | 10943  | -1.45  | -0.54 | 4.9E-04 | -1.49 | -0.58 | 1.6E-04 |
| Ttyh2   | 1994   | 1.66   | 0.73  | 6.6E-10 | 1.73  | 0.79  | 2.0E-11 |
| Tuba4a  | 873    | 2.84   | 1.50  | 3.5E-16 | 3.02  | 1.59  | 5.6E-18 |
| Tubb3   | 58234  | -1.25  | -0.33 | 1.8E-02 | -1.27 | -0.34 | 1.4E-02 |
| Tubb5   | 143831 | -1.19  | -0.25 | 6.0E-04 | -1.26 | -0.34 | 3.9E-06 |
| Tubgcp5 | 3696   | -1.29  | -0.36 | 2.7E-04 | -1.21 | -0.27 | 8.0E-03 |
| Tubgcp6 | 7162   | 1.68   | 0.75  | 1.2E-16 | 1.72  | 0.78  | 5.1E-18 |
| Tufm    | 6414   | 1.38   | 0.47  | 1.0E-06 | 1.27  | 0.34  | 4.9E-04 |
| Tuft1   | 785    | 4.25   | 2.09  | 8.2E-53 | 4.13  | 2.04  | 1.3E-50 |
| Tug1    | 14599  | -1.19  | -0.25 | 1.6E-04 | -1.26 | -0.33 | 2.8E-07 |
| Tulp3   | 3921   | 1.49   | 0.57  | 3.0E-08 | 1.43  | 0.51  | 8.7E-07 |
| Tusc1   | 250    | -2.59  | -1.37 | 6.2E-27 | -2.52 | -1.33 | 3.0E-25 |
| Tusc2   | 3022   | 1.63   | 0.70  | 9.8E-20 | 1.55  | 0.63  | 3.6E-16 |
| Tut4    | 12929  | -1.33  | -0.41 | 9.6E-07 | -1.25 | -0.32 | 1.3E-04 |
| Twf2    | 1910   | 1.56   | 0.64  | 1.4E-10 | 1.58  | 0.66  | 3.3E-11 |
| Twsg1   | 7741   | -1.59  | -0.67 | 6.2E-15 | -1.58 | -0.66 | 9.0E-15 |
| Txlnb   | 482    | -1.69  | -0.75 | 3.1E-03 | -1.62 | -0.70 | 6.9E-03 |
| Txlng   | 3438   | 1.74   | 0.80  | 1.2E-32 | 1.75  | 0.81  | 6.7E-33 |
| Txndc15 | 2764   | -1.52  | -0.61 | 2.3E-16 | -1.46 | -0.55 | 1.2E-13 |
| Txndc16 | 7016   | 2.19   | 1.13  | 6.2E-32 | 2.40  | 1.26  | 9.1E-40 |
| Txndc17 | 3932   | 1.34   | 0.43  | 9.8E-06 | 1.27  | 0.35  | 3.9E-04 |
| Txndc9  | 5445   | -1.59  | -0.67 | 9.6E-18 | -1.57 | -0.65 | 9.8E-17 |

|         |       |       |       |          |       |       |          |
|---------|-------|-------|-------|----------|-------|-------|----------|
| Txn14a  | 2661  | 1.53  | 0.62  | 5.5E-13  | 1.52  | 0.61  | 1.6E-12  |
| Txn14b  | 505   | -2.43 | -1.28 | 6.4E-47  | -2.48 | -1.31 | 6.9E-49  |
| Txnrd3  | 1181  | 1.47  | 0.55  | 3.3E-10  | 1.31  | 0.39  | 1.1E-05  |
| Tysnd1  | 1631  | 1.53  | 0.61  | 7.8E-10  | 1.39  | 0.48  | 2.0E-06  |
| Tyw1    | 2171  | 1.27  | 0.35  | 6.7E-07  | 1.22  | 0.29  | 6.2E-05  |
| Tyw3    | 881   | -1.80 | -0.85 | 4.8E-22  | -1.96 | -0.97 | 1.2E-28  |
| Tyw5    | 681   | -2.12 | -1.09 | 3.3E-26  | -2.11 | -1.08 | 9.4E-26  |
| U2af2   | 18489 | -1.37 | -0.46 | 8.6E-05  | -1.54 | -0.63 | 4.9E-08  |
| Uap1    | 3684  | 1.53  | 0.61  | 3.0E-21  | 1.57  | 0.65  | 1.3E-23  |
| Uap111  | 256   | 1.74  | 0.80  | 2.8E-04  | 1.61  | 0.69  | 1.9E-03  |
| Uba3    | 8246  | -1.44 | -0.52 | 5.7E-13  | -1.39 | -0.48 | 5.2E-11  |
| Uba6    | 7911  | 1.57  | 0.65  | 3.3E-07  | 1.73  | 0.79  | 4.1E-10  |
| Ubald2  | 2110  | -1.46 | -0.54 | 2.5E-06  | -1.49 | -0.58 | 5.6E-07  |
| Ubap1l  | 237   | 1.70  | 0.77  | 8.2E-03  | 1.81  | 0.85  | 3.1E-03  |
| Ubc     | 10057 | -1.43 | -0.51 | 4.2E-05  | -1.48 | -0.57 | 5.3E-06  |
| Ube2a   | 2741  | 1.40  | 0.48  | 2.9E-17  | 1.37  | 0.46  | 1.6E-15  |
| Ube2b   | 11470 | 1.23  | 0.29  | 4.3E-05  | 1.30  | 0.38  | 9.8E-08  |
| Ube2c   | 4290  | -1.50 | -0.59 | 7.6E-03  | -1.83 | -0.87 | 5.3E-05  |
| Ube2cbp | 200   | -3.11 | -1.64 | 4.5E-42  | -3.55 | -1.83 | 6.6E-51  |
| Ube2e1  | 7281  | -1.22 | -0.29 | 4.0E-04  | -1.27 | -0.34 | 3.0E-05  |
| Ube2e3  | 10363 | -1.66 | -0.73 | 1.5E-17  | -1.67 | -0.74 | 8.3E-18  |
| Ube2f   | 3212  | 1.50  | 0.58  | 5.2E-11  | 1.47  | 0.56  | 3.4E-10  |
| Ube2g2  | 3007  | 1.26  | 0.33  | 7.3E-06  | 1.14  | 0.19  | 1.5E-02  |
| Ube2h   | 11325 | 1.37  | 0.46  | 7.8E-08  | 1.29  | 0.37  | 1.7E-05  |
| Ube2o   | 8269  | 1.43  | 0.51  | 1.4E-05  | 1.38  | 0.46  | 1.1E-04  |
| Ube2q2  | 4081  | -1.35 | -0.43 | 4.0E-10  | -1.35 | -0.43 | 4.3E-10  |
| Ube2r2  | 10444 | -1.71 | -0.77 | 6.9E-12  | -1.90 | -0.92 | 1.7E-16  |
| Ube2t   | 1563  | 1.73  | 0.79  | 2.6E-09  | 1.79  | 0.84  | 2.4E-10  |
| Ube4a   | 11712 | 1.28  | 0.36  | 3.1E-04  | 1.36  | 0.44  | 6.1E-06  |
| Ubfd1   | 7495  | -1.31 | -0.39 | 4.1E-12  | -1.40 | -0.49 | 7.8E-18  |
| Ubiad1  | 958   | -1.55 | -0.64 | 9.6E-14  | -1.57 | -0.65 | 2.8E-14  |
| Ubl3    | 3853  | 1.39  | 0.47  | 1.1E-07  | 1.29  | 0.37  | 3.5E-05  |
| Ubl4a   | 2918  | -1.34 | -0.42 | 7.1E-10  | -1.46 | -0.55 | 5.3E-16  |
| Ubr1    | 5748  | -1.47 | -0.56 | 1.3E-06  | -1.37 | -0.46 | 9.7E-05  |
| Ubr2    | 9577  | 1.35  | 0.43  | 6.4E-06  | 1.42  | 0.51  | 1.0E-07  |
| Ubr7    | 8587  | 1.71  | 0.77  | 5.4E-13  | 1.62  | 0.70  | 8.9E-11  |
| Ubtd1   | 757   | 2.09  | 1.07  | 3.7E-16  | 2.12  | 1.09  | 1.3E-16  |
| Ubtf    | 9942  | -1.99 | -0.99 | 8.7E-27  | -2.23 | -1.16 | 8.1E-36  |
| Ubxn2a  | 2682  | 1.25  | 0.32  | 2.4E-02  | 1.33  | 0.41  | 2.9E-03  |
| Ubxn2b  | 5075  | 1.54  | 0.62  | 2.9E-12  | 1.62  | 0.70  | 4.4E-15  |
| Ubxn6   | 2946  | -1.51 | -0.60 | 1.2E-11  | -1.49 | -0.58 | 5.6E-11  |
| Ubxn8   | 490   | -7.75 | -2.95 | 8.8E-112 | -7.39 | -2.88 | 1.2E-106 |
| Uchl3   | 4070  | 1.67  | 0.74  | 4.3E-19  | 1.67  | 0.74  | 4.6E-19  |
| Uchl4   | 105   | 1.87  | 0.90  | 1.2E-09  | 2.01  | 1.00  | 1.5E-11  |
| Uchl5   | 3391  | 1.57  | 0.65  | 3.6E-08  | 1.46  | 0.55  | 4.5E-06  |
| Uck1    | 2727  | 1.26  | 0.33  | 7.3E-06  | 1.13  | 0.18  | 2.0E-02  |
| Uck1l   | 1542  | -1.48 | -0.57 | 9.1E-16  | -1.49 | -0.58 | 3.9E-16  |



|           |       |       |       |         |       |       |         |
|-----------|-------|-------|-------|---------|-------|-------|---------|
| Ucp2      | 2830  | 1.51  | 0.59  | 4.2E-03 | 1.42  | 0.50  | 1.7E-02 |
| Ufc1      | 3001  | -1.94 | -0.96 | 5.4E-36 | -2.04 | -1.03 | 1.3E-41 |
| Ufsp1     | 264   | 1.62  | 0.70  | 2.3E-09 | 1.68  | 0.75  | 1.6E-10 |
| Ugp2      | 6285  | 1.28  | 0.36  | 1.7E-05 | 1.29  | 0.37  | 9.7E-06 |
| Ugt8a     | 813   | 2.52  | 1.33  | 4.0E-35 | 2.56  | 1.36  | 2.3E-36 |
| Uhrf1bp1  | 5571  | 1.70  | 0.76  | 1.2E-21 | 1.77  | 0.82  | 6.7E-25 |
| Uhrf1bp1l | 5392  | -1.39 | -0.48 | 3.5E-08 | -1.33 | -0.41 | 2.7E-06 |
| Ulk2      | 9553  | -1.51 | -0.59 | 1.5E-11 | -1.47 | -0.55 | 2.5E-10 |
| Umad1     | 1184  | 1.46  | 0.55  | 2.0E-07 | 1.45  | 0.54  | 3.1E-07 |
| Unc119b   | 6746  | 1.58  | 0.66  | 2.0E-09 | 1.48  | 0.57  | 2.9E-07 |
| Unc13a    | 10790 | 2.41  | 1.27  | 2.4E-07 | 2.38  | 1.25  | 4.1E-07 |
| Unc45a    | 4861  | 1.35  | 0.43  | 4.8E-07 | 1.28  | 0.36  | 3.2E-05 |
| Unc5a     | 1158  | 1.98  | 0.98  | 4.3E-05 | 1.85  | 0.89  | 2.5E-04 |
| Unc5b     | 3707  | 1.69  | 0.75  | 4.9E-08 | 1.41  | 0.50  | 4.4E-04 |
| Unc5c     | 4631  | -2.20 | -1.14 | 1.5E-06 | -1.86 | -0.89 | 2.1E-04 |
| Unc79     | 2448  | -2.25 | -1.17 | 1.4E-06 | -2.15 | -1.10 | 5.9E-06 |
| Unk       | 3649  | -1.40 | -0.48 | 8.9E-05 | -1.49 | -0.57 | 2.8E-06 |
| Upf2      | 7646  | 1.31  | 0.39  | 1.6E-13 | 1.39  | 0.47  | 5.9E-19 |
| Upf3a     | 2232  | -3.26 | -1.71 | 8.0E-86 | -3.40 | -1.77 | 6.6E-92 |
| Upk1a     | 133   | 2.95  | 1.56  | 3.4E-19 | 2.50  | 1.32  | 4.4E-14 |
| Uqcc1     | 2275  | -1.52 | -0.60 | 4.2E-23 | -1.57 | -0.65 | 4.6E-27 |
| Uqcc2     | 2157  | -1.35 | -0.43 | 5.0E-05 | -1.37 | -0.46 | 1.6E-05 |
| Uqcc3     | 785   | -1.36 | -0.44 | 8.8E-07 | -1.40 | -0.48 | 7.0E-08 |
| Uqcrb     | 3751  | -1.34 | -0.43 | 7.5E-03 | -1.42 | -0.51 | 1.4E-03 |
| Uqcrh     | 9072  | 1.28  | 0.36  | 8.7E-05 | 1.25  | 0.32  | 4.4E-04 |
| Urb1      | 3093  | 1.42  | 0.51  | 3.4E-06 | 1.57  | 0.65  | 2.1E-09 |
| Urb2      | 3004  | 1.44  | 0.53  | 1.9E-06 | 1.41  | 0.50  | 8.9E-06 |
| Uri1      | 5183  | 1.50  | 0.58  | 1.2E-15 | 1.39  | 0.47  | 1.6E-10 |
| Urod      | 3339  | 1.71  | 0.77  | 1.1E-11 | 1.61  | 0.69  | 1.6E-09 |
| Use1      | 2661  | -1.34 | -0.42 | 9.7E-08 | -1.34 | -0.43 | 6.6E-08 |
| Usf1      | 5916  | -1.47 | -0.56 | 1.8E-05 | -1.62 | -0.70 | 5.7E-08 |
| Usf2      | 2029  | -1.74 | -0.80 | 3.3E-12 | -1.88 | -0.91 | 1.9E-15 |
| Ush1c     | 115   | -1.37 | -0.46 | 1.6E-02 | -1.34 | -0.43 | 2.8E-02 |
| Ushbp1    | 371   | -3.20 | -1.68 | 8.6E-47 | -3.17 | -1.66 | 6.6E-46 |
| Usp11     | 13046 | 1.26  | 0.34  | 5.7E-07 | 1.22  | 0.29  | 2.0E-05 |
| Usp13     | 1190  | -1.49 | -0.58 | 2.3E-06 | -1.35 | -0.44 | 4.6E-04 |
| Usp14     | 10421 | 1.31  | 0.39  | 1.2E-07 | 1.33  | 0.41  | 2.0E-08 |
| Usp15     | 8350  | 1.26  | 0.33  | 6.5E-04 | 1.37  | 0.46  | 1.2E-06 |
| Usp2      | 685   | 3.08  | 1.62  | 1.5E-34 | 2.78  | 1.47  | 1.2E-28 |
| Usp20     | 5012  | 2.30  | 1.20  | 1.5E-40 | 2.23  | 1.16  | 1.3E-37 |
| Usp21     | 4076  | -1.53 | -0.62 | 4.4E-09 | -1.66 | -0.73 | 1.7E-12 |
| Usp22     | 27317 | -1.36 | -0.45 | 5.6E-09 | -1.40 | -0.49 | 1.4E-10 |
| Usp24     | 8094  | -1.71 | -0.78 | 5.3E-10 | -1.50 | -0.59 | 3.4E-06 |
| Usp25     | 5073  | 2.37  | 1.24  | 2.8E-63 | 2.35  | 1.23  | 5.5E-62 |
| Usp28     | 6957  | 2.12  | 1.09  | 5.1E-79 | 2.10  | 1.07  | 4.8E-77 |
| Usp3      | 8060  | -1.23 | -0.30 | 6.0E-04 | -1.25 | -0.32 | 3.4E-04 |
| Usp30     | 2549  | 1.25  | 0.33  | 4.6E-09 | 1.15  | 0.20  | 3.5E-04 |

|          |       |       |       |         |        |       |         |
|----------|-------|-------|-------|---------|--------|-------|---------|
| Usp31    | 5042  | 1.47  | 0.56  | 1.8E-11 | 1.50   | 0.59  | 1.4E-12 |
| Usp32    | 9161  | 1.40  | 0.49  | 6.1E-04 | 1.53   | 0.62  | 1.1E-05 |
| Usp33    | 11847 | 1.48  | 0.57  | 4.7E-12 | 1.59   | 0.67  | 4.6E-16 |
| Usp35    | 1336  | 1.64  | 0.71  | 6.1E-10 | 1.60   | 0.68  | 3.8E-09 |
| Usp37    | 6619  | 1.24  | 0.31  | 1.9E-04 | 1.27   | 0.34  | 2.9E-05 |
| Usp38    | 5289  | 1.70  | 0.76  | 1.1E-20 | 1.66   | 0.73  | 7.2E-19 |
| Usp40    | 3424  | -2.32 | -1.21 | 7.0E-40 | -2.22  | -1.15 | 9.6E-36 |
| Usp42    | 4880  | -1.28 | -0.36 | 3.5E-07 | -1.30  | -0.38 | 7.6E-08 |
| Usp44    | 751   | 4.63  | 2.21  | 5.9E-11 | 3.59   | 1.84  | 6.3E-08 |
| Usp45    | 4065  | 1.41  | 0.50  | 1.6E-14 | 1.43   | 0.52  | 1.5E-15 |
| Usp46    | 4586  | -1.27 | -0.34 | 5.8E-06 | -1.27  | -0.34 | 8.0E-06 |
| Usp53    | 1386  | 1.88  | 0.91  | 2.2E-17 | 2.11   | 1.08  | 8.6E-24 |
| Usp6nl   | 3130  | -2.07 | -1.05 | 1.3E-51 | -2.11  | -1.08 | 1.1E-54 |
| Ust      | 474   | -1.35 | -0.43 | 7.4E-03 | -1.37  | -0.45 | 5.0E-03 |
| Utp11    | 3414  | 1.38  | 0.46  | 2.5E-06 | 1.28   | 0.36  | 3.6E-04 |
| Utp18    | 4018  | 1.37  | 0.45  | 4.1E-08 | 1.36   | 0.45  | 6.1E-08 |
| Utp20    | 4019  | -2.06 | -1.05 | 9.2E-13 | -1.93  | -0.95 | 1.1E-10 |
| Utp4     | 4066  | 1.86  | 0.90  | 2.3E-20 | 1.73   | 0.79  | 3.7E-16 |
| Uty      | 1375  | -1.36 | -0.44 | 5.2E-03 | -13.29 | -3.73 | 3.2E-05 |
| Uvrag    | 2289  | 1.82  | 0.86  | 2.5E-64 | 1.79   | 0.84  | 5.4E-60 |
| Uxt      | 528   | -1.44 | -0.52 | 2.2E-04 | -1.55  | -0.63 | 7.9E-06 |
| Vamp1    | 1657  | 2.02  | 1.02  | 4.1E-65 | 2.02   | 1.01  | 7.9E-64 |
| Vamp3    | 6118  | 1.30  | 0.38  | 3.5E-03 | 1.24   | 0.31  | 1.9E-02 |
| Vamp4    | 3673  | 1.31  | 0.39  | 2.6E-09 | 1.35   | 0.43  | 4.3E-11 |
| Vash2    | 4450  | -1.60 | -0.68 | 4.1E-16 | -1.68  | -0.75 | 3.5E-19 |
| Vasp     | 4288  | 1.59  | 0.67  | 2.0E-11 | 1.42   | 0.51  | 7.1E-07 |
| Vat1     | 12488 | 1.45  | 0.53  | 1.6E-10 | 1.38   | 0.47  | 2.5E-08 |
| Vat1l    | 5770  | 1.53  | 0.61  | 6.7E-06 | 1.50   | 0.58  | 1.8E-05 |
| Vav1     | 117   | -1.38 | -0.46 | 3.5E-02 | -1.62  | -0.69 | 1.2E-03 |
| Vav2     | 6464  | 1.31  | 0.39  | 5.9E-03 | 1.24   | 0.31  | 3.0E-02 |
| Vav3     | 2170  | -1.51 | -0.60 | 3.7E-06 | -1.57  | -0.65 | 4.5E-07 |
| Vcam1    | 4798  | -1.63 | -0.71 | 1.6E-10 | -1.44  | -0.52 | 3.8E-06 |
| Vcan     | 34687 | -2.25 | -1.17 | 5.8E-07 | -1.76  | -0.82 | 6.3E-04 |
| Vcl      | 8570  | 2.09  | 1.06  | 1.1E-06 | 2.17   | 1.12  | 2.8E-07 |
| Vcpip1   | 8251  | 1.31  | 0.39  | 5.6E-07 | 1.40   | 0.48  | 4.3E-10 |
| Vdac2    | 11384 | 1.29  | 0.37  | 5.2E-10 | 1.26   | 0.34  | 1.6E-08 |
| Vdr      | 170   | 6.19  | 2.63  | 1.5E-10 | 6.71   | 2.75  | 2.3E-11 |
| Vegfc    | 373   | -1.52 | -0.60 | 4.0E-06 | -1.73  | -0.79 | 1.1E-09 |
| Vegfd    | 111   | -2.21 | -1.14 | 2.6E-04 | -1.91  | -0.93 | 3.5E-03 |
| Veph1    | 1252  | -1.73 | -0.79 | 5.9E-03 | -1.74  | -0.80 | 5.8E-03 |
| Vgf      | 190   | 1.87  | 0.91  | 1.4E-02 | 1.83   | 0.88  | 1.9E-02 |
| Vgl3     | 1101  | -2.49 | -1.31 | 1.0E-02 | -2.14  | -1.10 | 3.7E-02 |
| Vipr1    | 150   | 2.57  | 1.36  | 7.5E-14 | 2.99   | 1.58  | 5.9E-18 |
| Vipr2    | 289   | -1.86 | -0.90 | 1.9E-07 | -2.05  | -1.04 | 1.9E-09 |
| Vkorc1l1 | 7992  | 1.53  | 0.61  | 1.1E-25 | 1.45   | 0.53  | 1.1E-19 |
| Vmac     | 1606  | 2.18  | 1.13  | 3.7E-66 | 2.08   | 1.06  | 5.6E-58 |
| Vmn2r1   | 117   | 2.46  | 1.30  | 4.1E-11 | 2.12   | 1.08  | 6.0E-08 |

|         |       |       |       |          |       |       |          |
|---------|-------|-------|-------|----------|-------|-------|----------|
| Vps13a  | 5354  | 1.76  | 0.81  | 7.0E-05  | 2.20  | 1.14  | 1.5E-08  |
| Vps26a  | 6362  | 1.62  | 0.70  | 6.2E-16  | 1.58  | 0.66  | 1.8E-14  |
| Vps26b  | 9586  | 1.26  | 0.33  | 3.4E-03  | 1.24  | 0.31  | 7.0E-03  |
| Vps26c  | 3950  | 1.43  | 0.51  | 1.7E-08  | 1.44  | 0.53  | 6.1E-09  |
| Vps29   | 6144  | 1.38  | 0.47  | 9.3E-24  | 1.38  | 0.46  | 3.1E-23  |
| Vps33b  | 2467  | 1.31  | 0.39  | 5.2E-08  | 1.22  | 0.29  | 9.5E-05  |
| Vps35   | 18421 | 1.29  | 0.37  | 3.1E-04  | 1.40  | 0.48  | 2.1E-06  |
| Vps35l  | 4929  | -1.46 | -0.54 | 8.7E-19  | -1.47 | -0.55 | 2.0E-19  |
| Vps36   | 4977  | -1.35 | -0.43 | 2.0E-10  | -1.37 | -0.45 | 2.6E-11  |
| Vps37a  | 6721  | 1.35  | 0.44  | 2.1E-05  | 1.49  | 0.58  | 1.3E-08  |
| Vps37c  | 1601  | -1.27 | -0.34 | 8.9E-03  | -1.31 | -0.39 | 3.0E-03  |
| Vps37d  | 1406  | -1.31 | -0.39 | 5.7E-03  | -1.36 | -0.44 | 1.6E-03  |
| Vps51   | 1271  | -3.16 | -1.66 | 6.0E-135 | -3.40 | -1.76 | 3.2E-151 |
| Vps52   | 3466  | -1.62 | -0.70 | 1.6E-20  | -1.70 | -0.76 | 1.9E-24  |
| Vps54   | 4716  | -1.45 | -0.53 | 6.4E-15  | -1.48 | -0.56 | 1.7E-16  |
| Vps72   | 5730  | -1.33 | -0.41 | 5.0E-05  | -1.50 | -0.59 | 5.3E-09  |
| Vps9d1  | 2534  | -1.71 | -0.77 | 4.3E-12  | -1.72 | -0.79 | 2.0E-12  |
| Vrk2    | 424   | -1.79 | -0.84 | 8.5E-05  | -2.08 | -1.06 | 5.4E-07  |
| Vsig10l | 394   | 1.53  | 0.62  | 2.3E-06  | 1.60  | 0.68  | 1.9E-07  |
| Vsig2   | 161   | -1.76 | -0.81 | 2.3E-04  | -1.71 | -0.78 | 5.1E-04  |
| Vstm4   | 264   | -2.96 | -1.56 | 4.6E-12  | -2.83 | -1.50 | 3.9E-11  |
| Vstm5   | 205   | -4.50 | -2.17 | 2.4E-12  | -4.02 | -2.01 | 1.1E-10  |
| Vti1a   | 2058  | -1.33 | -0.42 | 5.7E-14  | -1.40 | -0.49 | 6.7E-19  |
| Vwa7    | 164   | 2.50  | 1.32  | 6.6E-09  | 2.60  | 1.38  | 1.4E-09  |
| Vwa8    | 1662  | -1.47 | -0.56 | 2.9E-07  | -1.44 | -0.52 | 1.8E-06  |
| Vwc2    | 211   | -1.72 | -0.78 | 3.9E-03  | -1.68 | -0.75 | 5.7E-03  |
| Vxn     | 1156  | -4.08 | -2.03 | 1.5E-19  | -2.83 | -1.50 | 3.7E-11  |
| Wac     | 11365 | -1.34 | -0.42 | 1.4E-10  | -1.38 | -0.47 | 6.3E-13  |
| Wars2   | 727   | -2.89 | -1.53 | 7.0E-44  | -2.81 | -1.49 | 2.8E-41  |
| Wasf2   | 4611  | -1.24 | -0.31 | 1.9E-02  | -1.28 | -0.35 | 7.1E-03  |
| Wasf3   | 6105  | 1.63  | 0.70  | 2.9E-13  | 1.60  | 0.68  | 1.6E-12  |
| Washc1  | 2899  | 1.26  | 0.33  | 2.3E-05  | 1.22  | 0.29  | 2.5E-04  |
| Washc3  | 649   | -2.80 | -1.49 | 4.5E-86  | -2.60 | -1.38 | 7.7E-75  |
| Wbp1l   | 5892  | 1.39  | 0.47  | 4.1E-06  | 1.25  | 0.32  | 2.6E-03  |
| Wbp2    | 3393  | -2.33 | -1.22 | 2.3E-16  | -2.43 | -1.28 | 4.9E-18  |
| Wdcp    | 2022  | 2.28  | 1.19  | 2.9E-55  | 2.28  | 1.19  | 3.6E-55  |
| Wdfy2   | 5610  | 1.96  | 0.97  | 6.9E-52  | 1.94  | 0.96  | 4.1E-50  |
| Wdfy3   | 12067 | -2.06 | -1.04 | 5.2E-11  | -1.89 | -0.92 | 8.4E-09  |
| Wdhd1   | 6475  | 1.28  | 0.35  | 8.2E-03  | 1.25  | 0.32  | 1.9E-02  |
| Wdr11   | 4595  | -1.81 | -0.86 | 1.8E-46  | -1.82 | -0.87 | 1.7E-47  |
| Wdr12   | 4641  | 1.83  | 0.87  | 5.5E-35  | 1.92  | 0.94  | 3.0E-40  |
| Wdr13   | 8043  | -1.78 | -0.83 | 1.3E-07  | -1.71 | -0.78 | 9.4E-07  |
| Wdr17   | 1605  | 2.56  | 1.36  | 5.7E-20  | 2.70  | 1.43  | 4.0E-22  |
| Wdr19   | 3611  | 1.74  | 0.80  | 7.4E-16  | 1.89  | 0.92  | 1.1E-20  |
| Wdr25   | 391   | -1.55 | -0.64 | 3.9E-08  | -1.48 | -0.57 | 1.2E-06  |
| Wdr35   | 4986  | 1.52  | 0.61  | 9.1E-16  | 1.59  | 0.67  | 5.0E-19  |
| Wdr37   | 9100  | 1.39  | 0.48  | 1.9E-13  | 1.40  | 0.49  | 8.7E-14  |

|        |       |       |       |          |       |       |          |
|--------|-------|-------|-------|----------|-------|-------|----------|
| Wdr4   | 3027  | -1.43 | -0.52 | 2.4E-11  | -1.47 | -0.55 | 9.8E-13  |
| Wdr41  | 1513  | -2.70 | -1.43 | 1.1E-116 | -2.73 | -1.45 | 2.1E-118 |
| Wdr44  | 1568  | 1.53  | 0.61  | 3.7E-06  | 1.62  | 0.70  | 1.0E-07  |
| Wdr46  | 2803  | 1.68  | 0.75  | 1.6E-08  | 1.49  | 0.57  | 2.3E-05  |
| Wdr47  | 10290 | 1.40  | 0.48  | 3.9E-04  | 1.49  | 0.58  | 1.8E-05  |
| Wdr5   | 6808  | 1.51  | 0.59  | 2.2E-11  | 1.34  | 0.42  | 3.1E-06  |
| Wdr53  | 599   | -1.23 | -0.30 | 7.1E-04  | -1.36 | -0.45 | 2.2E-07  |
| Wdr54  | 840   | 1.93  | 0.95  | 1.5E-30  | 1.83  | 0.87  | 6.1E-26  |
| Wdr55  | 1636  | 1.26  | 0.33  | 3.2E-04  | 1.15  | 0.20  | 4.0E-02  |
| Wdr5b  | 920   | -1.34 | -0.42 | 3.0E-07  | -1.33 | -0.41 | 4.2E-07  |
| Wdr61  | 3886  | 1.27  | 0.34  | 3.8E-04  | 1.22  | 0.28  | 3.6E-03  |
| Wdr62  | 2137  | 2.25  | 1.17  | 1.2E-11  | 2.09  | 1.06  | 1.1E-09  |
| Wdr70  | 3264  | 1.29  | 0.37  | 7.6E-05  | 1.20  | 0.26  | 6.2E-03  |
| Wdr73  | 2484  | -1.25 | -0.32 | 8.8E-07  | -1.28 | -0.35 | 8.9E-08  |
| Wdr81  | 2430  | 1.35  | 0.44  | 9.5E-04  | 1.29  | 0.36  | 6.8E-03  |
| Wdr89  | 276   | -1.35 | -0.43 | 1.2E-03  | -1.54 | -0.62 | 2.7E-06  |
| Wdr90  | 4465  | 1.25  | 0.32  | 1.3E-02  | 1.21  | 0.28  | 3.6E-02  |
| Wdr91  | 1831  | 1.32  | 0.40  | 1.1E-06  | 1.30  | 0.37  | 7.5E-06  |
| Wdte1  | 5520  | 1.51  | 0.59  | 8.7E-10  | 1.48  | 0.56  | 5.4E-09  |
| Wfikn2 | 650   | -2.09 | -1.06 | 3.8E-08  | -2.16 | -1.11 | 9.2E-09  |
| Wfs1   | 1305  | 2.41  | 1.27  | 1.1E-34  | 2.24  | 1.17  | 2.2E-29  |
| Whamm  | 896   | 1.53  | 0.61  | 3.7E-14  | 1.49  | 0.57  | 2.4E-12  |
| Whrn   | 3196  | 2.42  | 1.27  | 4.7E-23  | 2.30  | 1.20  | 1.4E-20  |
| Wipf1  | 1705  | -1.80 | -0.84 | 2.2E-07  | -1.74 | -0.80 | 1.1E-06  |
| Wipi1  | 3596  | 3.00  | 1.58  | 1.7E-38  | 3.18  | 1.67  | 1.4E-42  |
| Wipi2  | 9643  | 1.70  | 0.76  | 4.7E-49  | 1.64  | 0.72  | 3.4E-43  |
| Wiz    | 7689  | -1.39 | -0.48 | 5.8E-04  | -1.54 | -0.63 | 4.7E-06  |
| Wnt10b | 116   | -3.73 | -1.90 | 2.4E-03  | -3.29 | -1.72 | 6.8E-03  |
| Wnt16  | 127   | 2.71  | 1.44  | 1.2E-03  | 3.13  | 1.65  | 2.0E-04  |
| Wnt3a  | 207   | -3.64 | -1.87 | 1.6E-12  | -4.01 | -2.01 | 2.7E-14  |
| Wnt5a  | 3387  | -2.78 | -1.47 | 5.2E-10  | -2.58 | -1.36 | 1.0E-08  |
| Wnt6   | 289   | -2.44 | -1.29 | 1.2E-03  | -2.42 | -1.27 | 1.5E-03  |
| Wnt7b  | 4194  | -1.68 | -0.75 | 1.4E-06  | -1.97 | -0.98 | 1.5E-10  |
| Wrap53 | 1991  | 1.84  | 0.88  | 9.0E-26  | 1.71  | 0.78  | 4.0E-20  |
| Wrap73 | 1836  | 1.40  | 0.49  | 1.7E-09  | 1.22  | 0.29  | 5.2E-04  |
| Wrnip1 | 3529  | 1.26  | 0.33  | 2.6E-08  | 1.24  | 0.31  | 1.2E-07  |
| Wsb1   | 31033 | -1.42 | -0.50 | 6.3E-08  | -1.35 | -0.44 | 2.8E-06  |
| Wsb2   | 6503  | 1.26  | 0.33  | 2.9E-03  | 1.25  | 0.33  | 3.6E-03  |
| Wscd2  | 862   | -1.38 | -0.47 | 2.0E-04  | -1.46 | -0.55 | 1.0E-05  |
| Wtap   | 8523  | -1.26 | -0.34 | 2.5E-07  | -1.29 | -0.37 | 1.5E-08  |
| Wtip   | 1084  | -1.27 | -0.35 | 4.2E-05  | -1.27 | -0.34 | 7.8E-05  |
| Wwc1   | 4810  | 1.26  | 0.34  | 4.4E-03  | 1.19  | 0.25  | 3.7E-02  |
| Wwc2   | 4495  | 1.48  | 0.56  | 1.0E-12  | 1.56  | 0.64  | 4.6E-16  |
| Wwox   | 842   | 1.32  | 0.40  | 4.9E-07  | 1.23  | 0.30  | 1.8E-04  |
| Wwp2   | 6670  | -2.23 | -1.16 | 1.8E-10  | -2.10 | -1.07 | 4.5E-09  |
| Wwtr1  | 5460  | 1.26  | 0.34  | 8.3E-04  | 1.28  | 0.36  | 3.5E-04  |
| Xab2   | 4342  | 1.25  | 0.32  | 4.8E-04  | 1.14  | 0.19  | 4.6E-02  |

|         |       |       |       |         |       |       |         |
|---------|-------|-------|-------|---------|-------|-------|---------|
| Xiap    | 8307  | -2.01 | -1.01 | 1.3E-27 | -1.94 | -0.95 | 9.2E-25 |
| Xkr5    | 243   | -3.20 | -1.68 | 1.5E-12 | -3.41 | -1.77 | 8.9E-14 |
| Xkr8    | 646   | 1.50  | 0.59  | 9.8E-11 | 1.48  | 0.56  | 5.6E-10 |
| Xndc1   | 858   | -2.03 | -1.02 | 1.1E-16 | -2.04 | -1.03 | 7.6E-17 |
| Xpc     | 3233  | 1.40  | 0.49  | 2.2E-17 | 1.41  | 0.49  | 1.2E-17 |
| Xpnpep3 | 1957  | 1.35  | 0.43  | 3.4E-11 | 1.38  | 0.47  | 3.8E-13 |
| Xpo5    | 13073 | 1.26  | 0.34  | 7.1E-05 | 1.23  | 0.30  | 4.9E-04 |
| Xpr1    | 27946 | 1.49  | 0.58  | 2.8E-03 | 1.53  | 0.61  | 1.6E-03 |
| Xrcc3   | 1217  | 2.47  | 1.31  | 1.3E-12 | 2.08  | 1.06  | 1.1E-08 |
| Xrcc4   | 489   | -2.16 | -1.11 | 6.9E-21 | -2.06 | -1.05 | 1.2E-18 |
| Xrcc5   | 2588  | -1.57 | -0.65 | 4.3E-05 | -1.59 | -0.66 | 2.8E-05 |
| Xrcc6   | 3705  | 1.36  | 0.45  | 7.6E-09 | 1.32  | 0.40  | 2.1E-07 |
| Xylb    | 865   | 1.56  | 0.64  | 1.1E-06 | 1.42  | 0.51  | 1.4E-04 |
| Xylt1   | 2099  | -1.27 | -0.35 | 3.2E-03 | -1.23 | -0.30 | 1.2E-02 |
| Yap1    | 9174  | -1.70 | -0.77 | 7.7E-08 | -1.87 | -0.91 | 1.9E-10 |
| Yars    | 8078  | 1.34  | 0.42  | 1.8E-12 | 1.25  | 0.32  | 1.3E-07 |
| Yars2   | 1086  | -1.42 | -0.51 | 6.4E-09 | -1.46 | -0.54 | 4.8E-10 |
| Ybey    | 491   | -1.40 | -0.48 | 8.1E-06 | -1.41 | -0.49 | 6.0E-06 |
| Ybx2    | 3335  | 3.88  | 1.96  | 6.2E-95 | 3.51  | 1.81  | 1.6E-81 |
| Ydjc    | 543   | 1.59  | 0.67  | 1.5E-04 | 1.71  | 0.78  | 1.0E-05 |
| Yeats2  | 8743  | -1.43 | -0.51 | 3.0E-18 | -1.38 | -0.47 | 3.4E-15 |
| Yeats4  | 4533  | -1.86 | -0.89 | 8.7E-17 | -2.01 | -1.01 | 3.6E-21 |
| Yes1    | 4825  | 1.51  | 0.59  | 1.1E-17 | 1.57  | 0.65  | 5.0E-21 |
| Yif1a   | 1279  | 1.27  | 0.35  | 4.9E-03 | 1.23  | 0.30  | 1.6E-02 |
| Yif1b   | 1218  | 1.31  | 0.39  | 1.2E-03 | 1.22  | 0.29  | 1.9E-02 |
| Yipf2   | 599   | -2.35 | -1.23 | 2.0E-69 | -2.61 | -1.38 | 1.0E-84 |
| Yju2    | 895   | -1.78 | -0.83 | 4.2E-13 | -2.05 | -1.04 | 7.8E-20 |
| Ykt6    | 11959 | 1.26  | 0.33  | 1.3E-11 | 1.18  | 0.23  | 2.1E-06 |
| Ypel1   | 3603  | -2.07 | -1.05 | 1.8E-23 | -2.22 | -1.15 | 6.7E-28 |
| Ypel2   | 2360  | 1.79  | 0.84  | 2.5E-16 | 1.70  | 0.77  | 8.8E-14 |
| Ypel4   | 1375  | -1.46 | -0.55 | 2.8E-03 | -1.47 | -0.56 | 2.4E-03 |
| Yrdc    | 1773  | 1.36  | 0.45  | 3.4E-06 | 1.25  | 0.32  | 1.0E-03 |
| Ythdf1  | 7205  | 1.29  | 0.36  | 1.3E-08 | 1.17  | 0.23  | 4.9E-04 |
| Ythdf2  | 7904  | -1.24 | -0.31 | 9.2E-05 | -1.30 | -0.38 | 1.2E-06 |
| Ywhae   | 73412 | -1.26 | -0.33 | 1.0E-04 | -1.36 | -0.44 | 1.2E-07 |
| Ywhah   | 13565 | -1.43 | -0.51 | 6.0E-11 | -1.48 | -0.56 | 6.1E-13 |
| Ywhaz   | 43502 | -1.35 | -0.43 | 1.8E-10 | -1.44 | -0.52 | 9.7E-15 |
| Zadh2   | 2087  | -1.20 | -0.26 | 2.4E-02 | -1.26 | -0.33 | 4.1E-03 |
| Zbed3   | 1723  | -1.61 | -0.69 | 4.8E-09 | -1.79 | -0.84 | 7.4E-13 |
| Zbtb1   | 2234  | -1.99 | -0.99 | 8.5E-51 | -1.95 | -0.96 | 2.8E-47 |
| Zbtb11  | 3024  | 1.25  | 0.33  | 1.9E-05 | 1.21  | 0.28  | 3.5E-04 |
| Zbtb14  | 2587  | -1.41 | -0.49 | 4.6E-08 | -1.42 | -0.50 | 2.8E-08 |
| Zbtb16  | 881   | 1.86  | 0.89  | 2.2E-04 | 1.70  | 0.77  | 1.7E-03 |
| Zbtb17  | 2743  | -1.51 | -0.59 | 6.5E-11 | -1.67 | -0.74 | 2.3E-16 |
| Zbtb2   | 1344  | -1.87 | -0.91 | 8.7E-24 | -1.93 | -0.95 | 6.9E-26 |
| Zbtb20  | 6592  | -2.52 | -1.34 | 2.0E-14 | -2.13 | -1.09 | 5.5E-10 |
| Zbtb22  | 1772  | -1.42 | -0.51 | 9.5E-09 | -1.61 | -0.68 | 5.0E-15 |

|          |       |       |       |         |       |       |         |
|----------|-------|-------|-------|---------|-------|-------|---------|
| Zbtb3    | 300   | -1.92 | -0.94 | 2.2E-18 | -2.02 | -1.02 | 6.3E-21 |
| Zbtb34   | 3174  | 1.49  | 0.57  | 2.2E-08 | 1.39  | 0.47  | 5.2E-06 |
| Zbtb38   | 1457  | -2.16 | -1.11 | 1.2E-07 | -2.01 | -1.00 | 1.9E-06 |
| Zbtb4    | 1452  | -1.33 | -0.41 | 1.2E-02 | -1.28 | -0.36 | 3.1E-02 |
| Zbtb40   | 1435  | -2.92 | -1.55 | 5.0E-38 | -2.90 | -1.54 | 1.7E-37 |
| Zbtb41   | 8934  | 1.24  | 0.31  | 1.4E-02 | 1.30  | 0.38  | 2.3E-03 |
| Zbtb42   | 494   | 2.41  | 1.27  | 7.3E-19 | 2.05  | 1.03  | 6.8E-13 |
| Zbtb43   | 3435  | 1.28  | 0.36  | 4.0E-10 | 1.30  | 0.37  | 4.7E-11 |
| Zbtb45   | 1207  | -1.77 | -0.82 | 2.6E-09 | -2.04 | -1.03 | 4.1E-14 |
| Zbtb46   | 2860  | 2.14  | 1.10  | 1.4E-36 | 2.06  | 1.04  | 3.8E-33 |
| Zbtb48   | 1459  | 1.44  | 0.52  | 3.3E-06 | 1.30  | 0.38  | 9.0E-04 |
| Zbtb7b   | 537   | 3.27  | 1.71  | 8.3E-13 | 3.09  | 1.63  | 1.1E-11 |
| Zbtb8a   | 612   | -1.85 | -0.89 | 9.5E-22 | -1.83 | -0.88 | 3.9E-21 |
| Zbtb8b   | 664   | 1.84  | 0.88  | 4.7E-05 | 2.13  | 1.09  | 3.7E-07 |
| Zbtb9    | 266   | 2.03  | 1.02  | 2.2E-13 | 1.74  | 0.80  | 9.6E-09 |
| Zc2hc1a  | 7340  | 1.36  | 0.44  | 1.8E-04 | 1.46  | 0.54  | 2.6E-06 |
| Zc2hc1c  | 202   | 2.08  | 1.06  | 2.2E-19 | 2.14  | 1.10  | 9.6E-21 |
| Zc3h13   | 11899 | 1.31  | 0.39  | 7.1E-07 | 1.33  | 0.41  | 1.5E-07 |
| Zc3h14   | 13241 | 1.26  | 0.33  | 8.9E-04 | 1.27  | 0.35  | 4.2E-04 |
| Zc3h4    | 6993  | -2.62 | -1.39 | 3.8E-24 | -2.79 | -1.48 | 3.1E-27 |
| Zc3h7a   | 9457  | 1.21  | 0.27  | 1.6E-05 | 1.31  | 0.39  | 2.5E-10 |
| Zc3h7b   | 14482 | -1.61 | -0.69 | 1.3E-07 | -1.74 | -0.80 | 6.6E-10 |
| Zc3hav1l | 4136  | -2.46 | -1.30 | 1.6E-65 | -2.57 | -1.36 | 2.9E-72 |
| Zc4h2    | 3787  | -1.58 | -0.66 | 3.2E-08 | -1.49 | -0.58 | 1.5E-06 |
| Zcchc10  | 635   | -1.73 | -0.79 | 1.1E-09 | -1.94 | -0.96 | 1.1E-13 |
| Zcchc12  | 7495  | 1.59  | 0.67  | 3.2E-05 | 1.57  | 0.65  | 5.4E-05 |
| Zcchc17  | 3503  | 1.44  | 0.52  | 9.5E-19 | 1.43  | 0.52  | 2.3E-18 |
| Zcchc18  | 5879  | -1.24 | -0.31 | 4.3E-02 | -1.28 | -0.36 | 1.8E-02 |
| Zcchc2   | 2689  | 2.15  | 1.10  | 7.1E-52 | 2.10  | 1.07  | 8.3E-49 |
| Zcchc4   | 1442  | -1.78 | -0.83 | 1.9E-32 | -1.78 | -0.83 | 1.8E-32 |
| Zcchc9   | 1816  | -1.54 | -0.63 | 5.8E-21 | -1.63 | -0.71 | 2.2E-26 |
| Zdbf2    | 13706 | 1.60  | 0.68  | 8.1E-06 | 1.55  | 0.64  | 3.2E-05 |
| Zdhhc12  | 777   | 2.01  | 1.01  | 5.3E-18 | 1.79  | 0.84  | 8.5E-13 |
| Zdhhc13  | 2682  | 1.37  | 0.46  | 1.4E-08 | 1.41  | 0.50  | 5.4E-10 |
| Zdhhc17  | 6534  | -1.62 | -0.69 | 6.5E-10 | -1.51 | -0.59 | 1.7E-07 |
| Zdhhc20  | 8506  | 1.29  | 0.37  | 4.4E-11 | 1.35  | 0.44  | 5.1E-15 |
| Zdhhc23  | 462   | 2.03  | 1.02  | 5.3E-06 | 2.05  | 1.03  | 4.3E-06 |
| Zdhhc24  | 1564  | 1.37  | 0.46  | 5.8E-10 | 1.31  | 0.39  | 2.0E-07 |
| Zdhhc3   | 6586  | -1.23 | -0.29 | 1.3E-09 | -1.28 | -0.36 | 6.3E-14 |
| Zdhhc4   | 1491  | -1.24 | -0.31 | 1.4E-07 | -1.29 | -0.37 | 2.6E-10 |
| Zeb2     | 8459  | -2.12 | -1.08 | 3.6E-24 | -1.99 | -0.99 | 1.9E-20 |
| Zfand4   | 1432  | 1.58  | 0.66  | 1.7E-07 | 1.49  | 0.57  | 5.8E-06 |
| Zfand5   | 13265 | -1.26 | -0.33 | 5.6E-05 | -1.32 | -0.40 | 1.5E-06 |
| Zfand6   | 11669 | 1.41  | 0.50  | 1.4E-15 | 1.45  | 0.54  | 4.4E-18 |
| Zfat     | 427   | -7.05 | -2.82 | 1.4E-91 | -7.47 | -2.90 | 5.4E-97 |
| Zfc3h1   | 13100 | 1.57  | 0.65  | 3.4E-09 | 1.78  | 0.83  | 2.6E-14 |
| Zfhx3    | 8229  | -1.96 | -0.97 | 5.0E-07 | -2.12 | -1.08 | 1.8E-08 |



|         |       |       |       |         |       |       |         |
|---------|-------|-------|-------|---------|-------|-------|---------|
| Zfhx4   | 12364 | -3.17 | -1.67 | 8.0E-49 | -2.88 | -1.53 | 4.2E-41 |
| Zfp1    | 1240  | -1.54 | -0.63 | 2.7E-13 | -1.60 | -0.67 | 3.5E-15 |
| Zfp105  | 1673  | -1.52 | -0.61 | 5.6E-11 | -1.74 | -0.80 | 4.1E-18 |
| Zfp111  | 1581  | -1.63 | -0.71 | 3.6E-24 | -1.70 | -0.76 | 1.3E-27 |
| Zfp113  | 3507  | -1.47 | -0.56 | 1.7E-12 | -1.48 | -0.56 | 8.7E-13 |
| Zfp114  | 275   | -2.22 | -1.15 | 4.5E-11 | -1.74 | -0.80 | 6.5E-06 |
| Zfp119b | 356   | -1.39 | -0.48 | 2.9E-06 | -1.46 | -0.55 | 6.0E-08 |
| Zfp142  | 3811  | 1.49  | 0.57  | 1.3E-10 | 1.50  | 0.59  | 3.5E-11 |
| Zfp146  | 7965  | -1.58 | -0.66 | 1.2E-20 | -1.58 | -0.66 | 1.6E-20 |
| Zfp157  | 6202  | -1.42 | -0.50 | 1.6E-07 | -1.34 | -0.42 | 1.6E-05 |
| Zfp169  | 1064  | 1.39  | 0.48  | 4.3E-02 | 1.59  | 0.67  | 3.8E-03 |
| Zfp174  | 639   | 1.29  | 0.37  | 1.3E-02 | 1.38  | 0.47  | 1.6E-03 |
| Zfp180  | 3261  | -1.35 | -0.44 | 2.5E-11 | -1.42 | -0.51 | 7.7E-15 |
| Zfp182  | 1697  | -1.34 | -0.42 | 1.1E-04 | -1.22 | -0.29 | 1.1E-02 |
| Zfp189  | 1767  | 1.27  | 0.35  | 8.8E-06 | 1.35  | 0.43  | 2.1E-08 |
| Zfp2    | 2785  | -1.82 | -0.87 | 4.0E-12 | -1.70 | -0.77 | 1.0E-09 |
| Zfp217  | 3397  | 1.49  | 0.58  | 4.7E-07 | 1.40  | 0.49  | 2.2E-05 |
| Zfp219  | 6817  | -1.67 | -0.74 | 9.0E-07 | -1.93 | -0.95 | 1.9E-10 |
| Zfp229  | 1688  | -1.42 | -0.51 | 6.5E-11 | -1.38 | -0.46 | 4.1E-09 |
| Zfp236  | 3882  | -2.20 | -1.14 | 2.2E-26 | -2.06 | -1.05 | 1.8E-22 |
| Zfp24   | 7979  | -1.61 | -0.69 | 3.4E-15 | -1.57 | -0.65 | 7.0E-14 |
| Zfp248  | 1254  | -1.37 | -0.46 | 3.9E-11 | -1.35 | -0.43 | 4.0E-10 |
| Zfp251  | 5453  | 1.39  | 0.48  | 2.0E-25 | 1.34  | 0.42  | 3.6E-20 |
| Zfp26   | 5885  | -1.37 | -0.46 | 9.3E-07 | -1.27 | -0.34 | 3.8E-04 |
| Zfp260  | 8170  | -1.84 | -0.88 | 2.3E-32 | -1.78 | -0.83 | 1.5E-28 |
| Zfp267  | 3366  | 1.24  | 0.32  | 3.6E-03 | 1.35  | 0.44  | 3.8E-05 |
| Zfp273  | 716   | -1.74 | -0.80 | 9.4E-11 | -1.62 | -0.70 | 2.0E-08 |
| Zfp276  | 2602  | 1.25  | 0.33  | 2.1E-05 | 1.23  | 0.30  | 1.2E-04 |
| Zfp277  | 3025  | 1.93  | 0.95  | 1.8E-21 | 1.97  | 0.97  | 1.1E-22 |
| Zfp280c | 4253  | -1.45 | -0.54 | 2.4E-07 | -1.42 | -0.51 | 1.3E-06 |
| Zfp280d | 6356  | -1.86 | -0.89 | 1.0E-25 | -1.89 | -0.92 | 4.0E-27 |
| Zfp282  | 3474  | -1.38 | -0.46 | 1.4E-07 | -1.46 | -0.54 | 5.9E-10 |
| Zfp286  | 2098  | -1.37 | -0.45 | 5.1E-07 | -1.28 | -0.35 | 1.2E-04 |
| Zfp292  | 13697 | -1.64 | -0.71 | 1.3E-05 | -1.38 | -0.46 | 6.2E-03 |
| Zfp317  | 5125  | -1.25 | -0.33 | 1.9E-08 | -1.19 | -0.25 | 1.6E-05 |
| Zfp324  | 2240  | 1.26  | 0.34  | 3.0E-07 | 1.32  | 0.40  | 8.7E-10 |
| Zfp326  | 7224  | -1.36 | -0.44 | 1.2E-07 | -1.41 | -0.49 | 2.3E-09 |
| Zfp334  | 5954  | -1.29 | -0.36 | 5.0E-06 | -1.35 | -0.43 | 5.6E-08 |
| Zfp335  | 2346  | -1.52 | -0.60 | 1.9E-09 | -1.57 | -0.65 | 8.3E-11 |
| Zfp341  | 517   | -4.29 | -2.10 | 1.6E-34 | -4.49 | -2.17 | 1.1E-36 |
| Zfp346  | 3584  | 1.60  | 0.68  | 1.1E-40 | 1.57  | 0.65  | 2.7E-37 |
| Zfp358  | 2672  | -1.56 | -0.64 | 1.6E-17 | -1.64 | -0.71 | 2.2E-21 |
| Zfp362  | 4782  | -2.00 | -1.00 | 1.5E-10 | -2.34 | -1.23 | 2.6E-15 |
| Zfp366  | 402   | -1.69 | -0.75 | 2.8E-07 | -1.69 | -0.76 | 2.2E-07 |
| Zfp36l1 | 11177 | -1.39 | -0.47 | 3.7E-03 | -1.58 | -0.66 | 3.6E-05 |
| Zfp36l2 | 2849  | -1.35 | -0.43 | 4.2E-03 | -1.44 | -0.53 | 4.3E-04 |
| Zfp37   | 2948  | -1.43 | -0.52 | 3.3E-09 | -1.43 | -0.52 | 3.7E-09 |

|         |       |       |       |         |       |       |         |
|---------|-------|-------|-------|---------|-------|-------|---------|
| Zfp383  | 3042  | -1.69 | -0.75 | 5.5E-32 | -1.69 | -0.76 | 1.5E-32 |
| Zfp384  | 5270  | -1.44 | -0.53 | 1.0E-24 | -1.46 | -0.54 | 1.4E-25 |
| Zfp385a | 3630  | 1.81  | 0.86  | 1.6E-10 | 1.59  | 0.66  | 1.0E-06 |
| Zfp395  | 2558  | 1.37  | 0.45  | 3.3E-03 | 1.33  | 0.41  | 8.1E-03 |
| Zfp407  | 2262  | -2.08 | -1.06 | 6.4E-20 | -1.88 | -0.91 | 5.1E-15 |
| Zfp414  | 804   | -2.07 | -1.05 | 3.5E-21 | -2.37 | -1.25 | 2.4E-29 |
| Zfp422  | 9862  | -1.87 | -0.90 | 4.6E-16 | -2.06 | -1.04 | 4.5E-21 |
| Zfp423  | 3023  | -1.96 | -0.97 | 2.5E-12 | -2.17 | -1.12 | 6.2E-16 |
| Zfp428  | 1831  | -2.44 | -1.28 | 4.2E-15 | -2.55 | -1.35 | 1.5E-16 |
| Zfp433  | 212   | -2.11 | -1.08 | 1.7E-12 | -1.79 | -0.84 | 4.9E-08 |
| Zfp438  | 263   | -1.94 | -0.95 | 2.0E-19 | -2.06 | -1.04 | 1.2E-22 |
| Zfp444  | 3554  | 1.57  | 0.65  | 4.9E-11 | 1.47  | 0.56  | 2.2E-08 |
| Zfp445  | 23451 | -1.41 | -0.50 | 5.0E-07 | -1.29 | -0.36 | 3.6E-04 |
| Zfp446  | 1546  | -1.44 | -0.53 | 1.4E-09 | -1.41 | -0.50 | 1.2E-08 |
| Zfp451  | 8614  | -1.33 | -0.41 | 1.6E-04 | -1.36 | -0.44 | 5.6E-05 |
| Zfp455  | 173   | -2.22 | -1.15 | 2.1E-08 | -2.01 | -1.01 | 1.1E-06 |
| Zfp459  | 134   | 1.53  | 0.62  | 3.2E-05 | 1.45  | 0.53  | 3.8E-04 |
| Zfp462  | 16096 | -2.88 | -1.53 | 2.8E-27 | -3.04 | -1.60 | 5.8E-30 |
| Zfp467  | 1555  | -3.18 | -1.67 | 1.1E-51 | -3.37 | -1.75 | 1.1E-56 |
| Zfp469  | 523   | -2.88 | -1.52 | 6.2E-06 | -3.13 | -1.65 | 1.0E-06 |
| Zfp493  | 542   | 1.32  | 0.40  | 1.4E-07 | 1.38  | 0.47  | 8.8E-10 |
| Zfp507  | 4725  | -1.34 | -0.42 | 2.2E-10 | -1.26 | -0.34 | 4.8E-07 |
| Zfp51   | 792   | -1.32 | -0.40 | 4.1E-04 | -1.22 | -0.29 | 1.4E-02 |
| Zfp511  | 1167  | -1.30 | -0.38 | 1.3E-05 | -1.42 | -0.51 | 3.1E-09 |
| Zfp512  | 8309  | -1.21 | -0.28 | 5.9E-05 | -1.25 | -0.32 | 5.1E-06 |
| Zfp512b | 10518 | -1.38 | -0.47 | 4.9E-05 | -1.41 | -0.50 | 1.5E-05 |
| Zfp513  | 1553  | -1.52 | -0.60 | 1.6E-09 | -1.63 | -0.71 | 1.1E-12 |
| Zfp516  | 6909  | 1.81  | 0.86  | 5.7E-26 | 1.83  | 0.87  | 5.7E-27 |
| Zfp518a | 3169  | -1.80 | -0.85 | 4.4E-17 | -1.61 | -0.69 | 1.4E-11 |
| Zfp518b | 8224  | -1.57 | -0.66 | 1.4E-10 | -1.62 | -0.69 | 1.2E-11 |
| Zfp52   | 451   | 1.84  | 0.88  | 1.7E-14 | 1.89  | 0.92  | 2.1E-15 |
| Zfp521  | 5820  | -1.89 | -0.92 | 2.9E-72 | -1.92 | -0.94 | 1.2E-75 |
| Zfp523  | 3484  | -1.37 | -0.45 | 2.9E-05 | -1.42 | -0.51 | 2.7E-06 |
| Zfp53   | 877   | 1.26  | 0.33  | 5.6E-07 | 1.31  | 0.39  | 6.7E-09 |
| Zfp532  | 8221  | -2.91 | -1.54 | 5.1E-64 | -2.92 | -1.54 | 4.1E-64 |
| Zfp551  | 412   | -1.71 | -0.77 | 3.3E-03 | -1.48 | -0.57 | 3.5E-02 |
| Zfp558  | 2187  | -1.50 | -0.59 | 1.6E-03 | -1.49 | -0.58 | 2.0E-03 |
| Zfp560  | 1304  | -1.89 | -0.92 | 6.8E-13 | -1.86 | -0.89 | 2.9E-12 |
| Zfp563  | 2200  | -1.41 | -0.50 | 3.2E-04 | -1.35 | -0.44 | 1.9E-03 |
| Zfp566  | 616   | -1.22 | -0.28 | 1.4E-03 | -1.29 | -0.37 | 2.2E-05 |
| Zfp57   | 12157 | -2.06 | -1.04 | 3.4E-10 | -2.10 | -1.07 | 9.9E-11 |
| Zfp583  | 623   | -2.03 | -1.02 | 3.2E-38 | -2.06 | -1.05 | 9.0E-40 |
| Zfp592  | 3247  | -1.59 | -0.67 | 1.7E-12 | -1.64 | -0.71 | 8.3E-14 |
| Zfp593  | 936   | 1.82  | 0.86  | 1.0E-13 | 1.63  | 0.70  | 1.8E-09 |
| Zfp595  | 469   | -1.71 | -0.78 | 4.6E-11 | -1.44 | -0.53 | 1.3E-05 |
| Zfp60   | 11655 | -1.35 | -0.44 | 1.9E-05 | -1.26 | -0.33 | 1.5E-03 |
| Zfp605  | 1602  | -1.51 | -0.59 | 1.2E-07 | -1.43 | -0.52 | 4.4E-06 |

|         |       |       |       |         |       |       |         |
|---------|-------|-------|-------|---------|-------|-------|---------|
| Zfp608  | 6053  | -1.44 | -0.53 | 3.6E-08 | -1.46 | -0.54 | 1.4E-08 |
| Zfp61   | 1983  | -1.36 | -0.44 | 8.8E-11 | -1.42 | -0.51 | 1.3E-13 |
| Zfp612  | 3339  | 1.82  | 0.86  | 3.2E-49 | 1.88  | 0.91  | 1.2E-54 |
| Zfp618  | 6158  | -4.16 | -2.06 | 8.9E-83 | -4.04 | -2.01 | 3.7E-79 |
| Zfp619  | 823   | -2.46 | -1.30 | 4.2E-14 | -2.08 | -1.06 | 1.2E-09 |
| Zfp62   | 8113  | -1.41 | -0.49 | 1.7E-10 | -1.31 | -0.39 | 6.5E-07 |
| Zfp622  | 2705  | 1.28  | 0.36  | 6.6E-08 | 1.22  | 0.29  | 1.4E-05 |
| Zfp628  | 968   | -2.31 | -1.21 | 7.2E-12 | -2.59 | -1.37 | 6.2E-15 |
| Zfp637  | 1956  | -2.07 | -1.05 | 6.2E-64 | -2.13 | -1.09 | 2.0E-68 |
| Zfp638  | 16010 | -1.68 | -0.75 | 1.4E-10 | -1.43 | -0.52 | 1.3E-05 |
| Zfp639  | 3869  | 1.22  | 0.29  | 5.1E-06 | 1.25  | 0.32  | 2.9E-07 |
| Zfp641  | 621   | -1.59 | -0.67 | 1.6E-03 | -1.82 | -0.87 | 3.8E-05 |
| Zfp644  | 6934  | -1.76 | -0.81 | 6.7E-22 | -1.61 | -0.68 | 8.8E-16 |
| Zfp646  | 5666  | -1.35 | -0.44 | 1.9E-06 | -1.37 | -0.45 | 8.0E-07 |
| Zfp647  | 1177  | -1.39 | -0.48 | 1.1E-11 | -1.58 | -0.66 | 1.7E-21 |
| Zfp651  | 2369  | -1.33 | -0.41 | 2.1E-03 | -1.35 | -0.44 | 1.0E-03 |
| Zfp653  | 843   | -1.90 | -0.92 | 2.3E-14 | -2.13 | -1.09 | 1.1E-19 |
| Zfp654  | 3734  | 1.28  | 0.36  | 7.1E-05 | 1.33  | 0.41  | 4.8E-06 |
| Zfp661  | 1390  | 1.36  | 0.44  | 4.4E-16 | 1.33  | 0.41  | 4.7E-14 |
| Zfp667  | 2531  | 2.25  | 1.17  | 3.6E-56 | 2.26  | 1.18  | 1.2E-56 |
| Zfp668  | 2202  | -1.35 | -0.44 | 6.5E-04 | -1.53 | -0.61 | 1.1E-06 |
| Zfp68   | 6844  | -1.32 | -0.40 | 3.6E-06 | -1.23 | -0.30 | 6.1E-04 |
| Zfp687  | 5934  | 1.69  | 0.76  | 6.6E-16 | 1.57  | 0.65  | 6.4E-12 |
| Zfp69   | 585   | 1.62  | 0.70  | 7.2E-18 | 1.67  | 0.74  | 1.3E-19 |
| Zfp697  | 2635  | -1.19 | -0.26 | 2.0E-02 | -1.25 | -0.32 | 2.8E-03 |
| Zfp7    | 1302  | 1.27  | 0.35  | 2.6E-06 | 1.20  | 0.26  | 6.0E-04 |
| Zfp710  | 2445  | -1.74 | -0.80 | 5.0E-06 | -2.06 | -1.04 | 1.5E-09 |
| Zfp711  | 4206  | -1.40 | -0.48 | 3.4E-04 | -1.42 | -0.50 | 1.8E-04 |
| Zfp715  | 3122  | 1.27  | 0.35  | 4.4E-04 | 1.35  | 0.43  | 1.0E-05 |
| Zfp729b | 752   | -1.26 | -0.34 | 9.7E-04 | -1.20 | -0.27 | 1.0E-02 |
| Zfp74   | 1344  | -2.08 | -1.05 | 1.5E-28 | -2.20 | -1.14 | 5.9E-33 |
| Zfp746  | 2619  | -1.31 | -0.39 | 1.1E-06 | -1.33 | -0.42 | 2.6E-07 |
| Zfp747  | 677   | 1.48  | 0.57  | 5.7E-12 | 1.35  | 0.44  | 1.9E-07 |
| Zfp759  | 686   | -1.42 | -0.51 | 6.6E-04 | -1.28 | -0.35 | 2.2E-02 |
| Zfp764  | 465   | -1.27 | -0.35 | 3.7E-04 | -1.24 | -0.31 | 1.6E-03 |
| Zfp772  | 1294  | 2.03  | 1.02  | 7.7E-35 | 1.83  | 0.87  | 1.4E-25 |
| Zfp773  | 1023  | -2.08 | -1.06 | 3.5E-07 | -2.12 | -1.08 | 1.9E-07 |
| Zfp775  | 967   | 1.25  | 0.33  | 1.2E-03 | 1.23  | 0.30  | 3.5E-03 |
| Zfp777  | 1941  | -1.19 | -0.25 | 1.8E-03 | -1.31 | -0.39 | 1.0E-06 |
| Zfp78   | 400   | 1.98  | 0.98  | 6.7E-18 | 1.97  | 0.98  | 1.5E-17 |
| Zfp781  | 182   | -1.30 | -0.38 | 1.6E-02 | -1.25 | -0.33 | 4.4E-02 |
| Zfp784  | 254   | -3.19 | -1.67 | 3.9E-49 | -3.24 | -1.70 | 3.3E-50 |
| Zfp787  | 1026  | -1.54 | -0.63 | 1.9E-10 | -1.56 | -0.65 | 5.6E-11 |
| Zfp788  | 3856  | -1.42 | -0.51 | 9.6E-06 | -1.40 | -0.48 | 3.2E-05 |
| Zfp800  | 1722  | 1.28  | 0.36  | 8.9E-05 | 1.28  | 0.36  | 8.5E-05 |
| Zfp804a | 553   | -1.88 | -0.91 | 3.6E-03 | -1.68 | -0.75 | 2.0E-02 |
| Zfp808  | 588   | -1.39 | -0.48 | 5.6E-04 | -1.41 | -0.49 | 4.0E-04 |

|         |       |       |       |         |       |       |         |
|---------|-------|-------|-------|---------|-------|-------|---------|
| Zfp809  | 728   | -1.57 | -0.65 | 2.0E-13 | -1.51 | -0.59 | 4.0E-11 |
| Zfp810  | 2704  | -1.94 | -0.95 | 1.4E-35 | -1.95 | -0.96 | 4.9E-36 |
| Zfp820  | 1083  | 1.44  | 0.52  | 2.2E-04 | 1.39  | 0.48  | 7.8E-04 |
| Zfp821  | 5509  | -1.59 | -0.67 | 2.1E-09 | -1.67 | -0.74 | 3.3E-11 |
| Zfp825  | 894   | -1.43 | -0.51 | 1.1E-08 | -1.41 | -0.49 | 3.7E-08 |
| Zfp827  | 3982  | -2.60 | -1.38 | 2.6E-31 | -2.52 | -1.34 | 1.6E-29 |
| Zfp846  | 3942  | -1.68 | -0.75 | 1.5E-05 | -1.44 | -0.53 | 2.7E-03 |
| Zfp85   | 847   | 1.32  | 0.40  | 8.2E-05 | 1.39  | 0.47  | 2.4E-06 |
| Zfp850  | 2057  | 1.44  | 0.52  | 1.5E-07 | 1.60  | 0.68  | 4.3E-12 |
| Zfp866  | 5327  | -1.57 | -0.65 | 1.5E-13 | -1.49 | -0.57 | 8.0E-11 |
| Zfp867  | 2057  | 1.41  | 0.50  | 5.4E-09 | 1.48  | 0.56  | 2.7E-11 |
| Zfp868  | 2268  | -1.31 | -0.39 | 1.1E-06 | -1.36 | -0.44 | 3.7E-08 |
| Zfp869  | 3460  | -1.50 | -0.58 | 4.6E-24 | -1.46 | -0.54 | 2.9E-21 |
| Zfp870  | 1672  | 1.28  | 0.35  | 2.6E-06 | 1.28  | 0.36  | 2.0E-06 |
| Zfp873  | 927   | -2.50 | -1.32 | 8.5E-34 | -2.37 | -1.24 | 7.0E-30 |
| Zfp879  | 122   | -2.23 | -1.15 | 1.1E-11 | -1.87 | -0.90 | 1.9E-07 |
| Zfp882  | 1714  | -1.63 | -0.70 | 8.3E-08 | -1.35 | -0.43 | 1.5E-03 |
| Zfp9    | 2178  | -1.28 | -0.36 | 1.2E-03 | -1.22 | -0.29 | 9.5E-03 |
| Zfp90   | 3209  | -1.96 | -0.97 | 9.3E-26 | -1.96 | -0.97 | 4.9E-26 |
| Zfp91   | 10023 | -1.38 | -0.47 | 1.6E-07 | -1.40 | -0.49 | 4.5E-08 |
| Zfp934  | 795   | -1.37 | -0.45 | 2.7E-04 | -1.48 | -0.57 | 4.3E-06 |
| Zfp935  | 244   | -1.27 | -0.34 | 2.3E-03 | -1.27 | -0.34 | 2.6E-03 |
| Zfp94   | 741   | -1.41 | -0.49 | 7.1E-11 | -1.40 | -0.49 | 8.6E-11 |
| Zfp941  | 1127  | 1.33  | 0.41  | 3.2E-03 | 1.38  | 0.46  | 7.1E-04 |
| Zfp942  | 2807  | 1.35  | 0.43  | 5.9E-07 | 1.42  | 0.51  | 2.4E-09 |
| Zfp944  | 2350  | 1.73  | 0.79  | 9.7E-23 | 1.73  | 0.79  | 4.0E-23 |
| Zfp946  | 4810  | 1.25  | 0.32  | 6.0E-03 | 1.28  | 0.36  | 2.4E-03 |
| Zfp948  | 2365  | 1.57  | 0.65  | 2.8E-19 | 1.60  | 0.68  | 1.4E-20 |
| Zfp949  | 1805  | 1.25  | 0.33  | 2.2E-04 | 1.32  | 0.40  | 4.4E-06 |
| Zfp951  | 326   | -1.64 | -0.72 | 5.1E-05 | -1.62 | -0.70 | 9.0E-05 |
| Zfp954  | 1227  | 1.42  | 0.51  | 2.6E-07 | 1.47  | 0.56  | 1.1E-08 |
| Zfp955b | 4021  | 1.26  | 0.33  | 6.7E-04 | 1.38  | 0.46  | 1.3E-06 |
| Zfp958  | 1727  | 1.44  | 0.53  | 3.0E-12 | 1.53  | 0.61  | 3.9E-16 |
| Zfp959  | 799   | -1.44 | -0.53 | 9.5E-09 | -1.45 | -0.54 | 6.7E-09 |
| Zfp963  | 386   | -1.27 | -0.34 | 2.0E-02 | -1.50 | -0.59 | 3.9E-05 |
| Zfp964  | 711   | 1.41  | 0.50  | 5.2E-07 | 1.44  | 0.53  | 8.9E-08 |
| Zfp979  | 188   | -2.59 | -1.38 | 3.4E-12 | -2.57 | -1.36 | 4.8E-12 |
| Zfp994  | 951   | -1.27 | -0.35 | 1.3E-03 | -1.22 | -0.28 | 9.5E-03 |
| Zfpm1   | 1297  | 2.56  | 1.36  | 1.2E-21 | 2.62  | 1.39  | 1.1E-22 |
| Zfr2    | 2469  | 1.87  | 0.90  | 1.2E-08 | 1.93  | 0.95  | 1.7E-09 |
| Zfta    | 17016 | -2.73 | -1.45 | 7.0E-24 | -2.85 | -1.51 | 6.4E-26 |
| Zfx     | 4466  | -2.49 | -1.32 | 3.9E-50 | -2.46 | -1.30 | 7.7E-49 |
| Zfyve21 | 1323  | 1.51  | 0.60  | 4.2E-05 | 1.43  | 0.52  | 4.1E-04 |
| Zfyve26 | 2417  | -1.46 | -0.55 | 1.9E-09 | -1.33 | -0.41 | 1.0E-05 |
| Zfyve27 | 6713  | 1.72  | 0.78  | 2.5E-15 | 1.79  | 0.84  | 1.8E-17 |
| Zfyve28 | 820   | 4.08  | 2.03  | 1.5E-44 | 4.12  | 2.04  | 6.1E-45 |
| Zfyve9  | 3888  | -2.14 | -1.09 | 3.4E-34 | -1.96 | -0.97 | 3.5E-27 |

|          |       |       |       |         |       |       |         |
|----------|-------|-------|-------|---------|-------|-------|---------|
| Zhx2     | 1383  | -1.93 | -0.95 | 2.4E-11 | -1.92 | -0.94 | 3.8E-11 |
| Zhx3     | 3313  | 1.35  | 0.44  | 3.7E-06 | 1.41  | 0.49  | 1.8E-07 |
| Zic4     | 6358  | -1.29 | -0.36 | 1.0E-02 | -1.48 | -0.56 | 4.5E-05 |
| Zkscan1  | 8027  | -1.25 | -0.32 | 1.9E-05 | -1.23 | -0.30 | 1.1E-04 |
| Zkscan14 | 596   | 1.34  | 0.43  | 1.1E-04 | 1.32  | 0.40  | 3.3E-04 |
| Zkscan16 | 668   | 1.83  | 0.87  | 1.3E-03 | 2.57  | 1.36  | 2.7E-07 |
| Zkscan6  | 1229  | 1.27  | 0.35  | 5.2E-06 | 1.23  | 0.30  | 8.1E-05 |
| Zkscan8  | 5228  | -1.59 | -0.67 | 3.9E-06 | -1.33 | -0.41 | 5.8E-03 |
| Zmat3    | 4663  | 1.66  | 0.73  | 2.0E-06 | 1.43  | 0.52  | 1.0E-03 |
| Zmiz1    | 19376 | -1.45 | -0.53 | 1.1E-03 | -1.53 | -0.61 | 1.8E-04 |
| Zmym1    | 2904  | 1.34  | 0.42  | 3.7E-07 | 1.40  | 0.48  | 4.0E-09 |
| Zmym2    | 16595 | -1.41 | -0.49 | 2.1E-06 | -1.28 | -0.36 | 6.7E-04 |
| Zmym3    | 9494  | -1.27 | -0.35 | 4.2E-03 | -1.22 | -0.29 | 1.9E-02 |
| Zmym4    | 12662 | -1.53 | -0.61 | 7.8E-14 | -1.45 | -0.54 | 5.7E-11 |
| Zmynd10  | 281   | 1.93  | 0.95  | 2.1E-08 | 1.80  | 0.85  | 6.3E-07 |
| Zmynd11  | 13113 | -1.87 | -0.90 | 7.8E-23 | -1.83 | -0.87 | 1.8E-21 |
| Zmynd19  | 5752  | 1.54  | 0.63  | 1.5E-18 | 1.44  | 0.52  | 2.8E-13 |
| Zmynd8   | 7708  | -1.94 | -0.96 | 1.1E-19 | -1.96 | -0.97 | 3.1E-20 |
| Znhit1   | 1396  | -1.81 | -0.86 | 2.4E-44 | -1.90 | -0.93 | 6.2E-52 |
| Znhit3   | 1370  | 1.36  | 0.45  | 8.8E-08 | 1.31  | 0.39  | 5.3E-06 |
| Znrf2    | 4891  | 1.56  | 0.65  | 1.0E-03 | 1.64  | 0.72  | 2.5E-04 |
| Znrf3    | 1959  | 1.37  | 0.46  | 8.3E-07 | 1.24  | 0.32  | 9.1E-04 |
| Zpr1     | 3319  | 1.27  | 0.34  | 1.2E-06 | 1.20  | 0.27  | 1.9E-04 |
| Zranb1   | 8021  | 1.25  | 0.33  | 4.9E-04 | 1.25  | 0.32  | 7.3E-04 |
| Zrsr2    | 3328  | -1.37 | -0.46 | 5.2E-13 | -1.40 | -0.49 | 7.6E-15 |
| Zscan2   | 1220  | -1.35 | -0.43 | 1.2E-03 | -1.34 | -0.42 | 1.5E-03 |
| Zscan25  | 830   | -1.50 | -0.58 | 2.2E-11 | -1.66 | -0.73 | 4.5E-17 |
| Zswim3   | 917   | 1.67  | 0.74  | 3.9E-17 | 1.58  | 0.66  | 5.6E-14 |
| Zswim7   | 190   | -1.80 | -0.85 | 3.1E-11 | -1.88 | -0.91 | 1.1E-12 |
| Zswim8   | 18251 | 1.37  | 0.45  | 5.0E-05 | 1.33  | 0.41  | 2.4E-04 |
| Zswim9   | 2176  | -1.44 | -0.52 | 9.9E-18 | -1.44 | -0.52 | 1.0E-17 |
| Zw10     | 4754  | 1.31  | 0.39  | 1.1E-05 | 1.30  | 0.38  | 1.6E-05 |
| Zxdb     | 744   | -1.25 | -0.32 | 1.8E-02 | -1.26 | -0.34 | 1.3E-02 |
| Zxdc     | 2298  | 1.29  | 0.37  | 1.6E-05 | 1.32  | 0.40  | 2.8E-06 |
| Zyx      | 3763  | -1.29 | -0.37 | 2.0E-02 | -1.43 | -0.52 | 7.8E-04 |
| Zzz3     | 7137  | -2.00 | -1.00 | 1.4E-65 | -1.97 | -0.98 | 1.5E-62 |

| Gene          | Counts | FC    | LFC   | padj     |
|---------------|--------|-------|-------|----------|
| 2310061I04Rik | 1372   | -1.21 | -0.27 | 2.32E-02 |
| 2810408A11Rik | 1262   | -1.30 | -0.38 | 8.66E-03 |
| 4932438A13Rik | 11118  | 1.78  | 0.83  | 3.05E-03 |
| Aar2          | 2823   | -1.11 | -0.15 | 2.27E-03 |
| Acaca         | 13162  | 1.26  | 0.34  | 7.94E-03 |
| Acad11        | 989    | 1.30  | 0.38  | 1.47E-02 |
| Acss3         | 1028   | 1.68  | 0.75  | 1.27E-02 |
| Adamts7       | 3381   | -1.27 | -0.35 | 1.67E-03 |
| Adarb2        | 1599   | 1.53  | 0.61  | 1.40E-02 |
| Adcy5         | 3439   | 1.30  | 0.37  | 2.27E-02 |
| Adprh         | 5714   | -1.18 | -0.24 | 1.15E-02 |
| Adra1a        | 356    | 1.98  | 0.99  | 1.12E-03 |
| Alg12         | 845    | -1.17 | -0.23 | 1.24E-02 |
| Alms1         | 5356   | 1.67  | 0.74  | 1.45E-03 |
| Amer1         | 4653   | 1.26  | 0.34  | 1.33E-02 |
| Amot          | 9654   | 1.39  | 0.48  | 6.99E-03 |
| Anapc13       | 2092   | -1.46 | -0.54 | 1.14E-02 |
| Ankle1        | 1377   | -1.36 | -0.44 | 1.29E-02 |
| Ankrd40       | 4320   | -1.25 | -0.32 | 1.00E-02 |
| Ap1s1         | 5705   | -1.13 | -0.17 | 2.28E-02 |
| Apcdd1        | 10238  | -1.23 | -0.30 | 1.59E-03 |
| Apod          | 1656   | -1.33 | -0.41 | 2.16E-02 |
| Arhgap12      | 7583   | 1.19  | 0.25  | 2.13E-03 |
| Arl6ip4       | 2097   | -1.21 | -0.27 | 2.40E-02 |
| Arpc1a        | 8165   | -1.07 | -0.10 | 1.14E-02 |
| Asphd1        | 339    | -1.56 | -0.64 | 2.18E-02 |
| Atm           | 6498   | 1.60  | 0.68  | 2.25E-02 |
| Atp11a        | 8506   | 1.22  | 0.29  | 5.06E-03 |
| Atp2b1        | 13439  | 1.24  | 0.31  | 1.94E-02 |
| Atp5g2        | 5429   | -1.26 | -0.33 | 1.14E-02 |
| Atp7a         | 4050   | 1.55  | 0.64  | 1.10E-02 |
| Atr           | 6071   | 1.39  | 0.47  | 9.66E-03 |
| Atrn          | 8254   | 1.27  | 0.35  | 4.53E-03 |
| Atxn2l        | 14834  | -1.36 | -0.45 | 2.30E-03 |
| Axin1         | 4403   | -1.22 | -0.29 | 2.88E-03 |
| B230307C23Rik | 547    | 1.43  | 0.51  | 1.11E-03 |
| Babam2        | 1176   | -1.16 | -0.22 | 5.48E-03 |
| Bace2         | 192    | 1.49  | 0.58  | 1.98E-02 |
| Baz1a         | 3933   | -1.26 | -0.33 | 1.48E-02 |
| Bbs7          | 1938   | 1.13  | 0.18  | 8.69E-03 |
| Bcar3         | 561    | -1.29 | -0.37 | 1.38E-02 |
| Bfar          | 3491   | -1.11 | -0.15 | 1.03E-02 |
| Bloc1s5       | 1633   | -1.10 | -0.14 | 2.31E-02 |
| Bod1l         | 10264  | 1.43  | 0.52  | 1.78E-04 |
| Bola3         | 578    | -1.45 | -0.54 | 2.16E-04 |
| Bsg           | 12872  | -1.15 | -0.20 | 1.13E-02 |



|            |       |       |       |          |
|------------|-------|-------|-------|----------|
| Bud13      | 1542  | -1.16 | -0.22 | 2.42E-02 |
| Cacfd1     | 7691  | -1.32 | -0.40 | 2.60E-03 |
| Cage1      | 218   | 1.32  | 0.40  | 1.34E-02 |
| Cap2       | 1094  | -1.22 | -0.29 | 1.72E-02 |
| Capn15     | 3377  | -1.35 | -0.43 | 1.22E-02 |
| Ccdc71     | 2625  | -1.15 | -0.20 | 7.23E-03 |
| Ccdc74a    | 187   | -1.40 | -0.49 | 4.05E-05 |
| Ccna2      | 12858 | -1.42 | -0.51 | 8.24E-03 |
| Cdad1      | 2510  | 1.17  | 0.23  | 7.44E-03 |
| Cdc37l1    | 9737  | 1.43  | 0.52  | 2.16E-03 |
| Cdc42se1   | 5069  | -1.14 | -0.19 | 2.37E-02 |
| Cdc7       | 5452  | 1.11  | 0.15  | 1.46E-02 |
| Cds1       | 507   | 1.54  | 0.63  | 1.18E-02 |
| Cdv3       | 19643 | -1.20 | -0.26 | 1.17E-02 |
| Cenpt      | 3556  | -1.20 | -0.26 | 1.22E-03 |
| Cep290     | 3038  | 1.38  | 0.46  | 5.84E-03 |
| Cep89      | 3001  | -1.22 | -0.29 | 6.35E-03 |
| Cerkl      | 102   | 1.87  | 0.91  | 1.04E-04 |
| Cers6      | 6953  | 1.33  | 0.41  | 1.77E-02 |
| Cfap61     | 143   | 1.42  | 0.51  | 1.50E-02 |
| Cfap91     | 109   | -1.46 | -0.55 | 1.34E-02 |
| Chd1       | 9109  | 1.23  | 0.30  | 1.85E-03 |
| Chek1      | 2827  | -1.43 | -0.52 | 5.06E-03 |
| Chid1      | 2893  | 1.20  | 0.26  | 1.26E-02 |
| Chml       | 2840  | 1.24  | 0.31  | 1.48E-02 |
| Chpt1      | 2383  | 1.24  | 0.31  | 1.84E-02 |
| Chtf8      | 106   | -1.29 | -0.37 | 1.86E-02 |
| Ciao3      | 1278  | -1.15 | -0.21 | 4.13E-03 |
| Cited2     | 4639  | -1.28 | -0.35 | 6.19E-03 |
| Cldn11     | 1825  | -1.38 | -0.47 | 1.61E-02 |
| Cnot3      | 5875  | -1.22 | -0.29 | 9.80E-03 |
| Cnot9      | 6788  | -1.23 | -0.29 | 2.15E-03 |
| Coa8       | 1080  | -1.17 | -0.23 | 1.93E-03 |
| Coasy      | 2229  | -1.13 | -0.18 | 1.80E-02 |
| Cog8       | 1756  | -1.15 | -0.21 | 1.22E-03 |
| Col22a1    | 1457  | -1.23 | -0.30 | 2.31E-02 |
| Cops7b     | 3301  | -1.13 | -0.18 | 2.11E-02 |
| Cops8      | 5467  | -1.13 | -0.17 | 2.14E-02 |
| Cox18      | 615   | -1.13 | -0.17 | 8.45E-03 |
| Cpne8      | 442   | -1.31 | -0.39 | 2.17E-02 |
| Crim1      | 3274  | 1.21  | 0.28  | 1.92E-02 |
| Csf2rb     | 112   | -2.31 | -1.21 | 1.02E-03 |
| Csgalnact2 | 1421  | 1.21  | 0.28  | 4.87E-03 |
| Csk        | 5914  | -1.28 | -0.35 | 2.15E-03 |
| Cspp1      | 7665  | 1.18  | 0.23  | 1.80E-02 |
| Ctnna1     | 14712 | -1.22 | -0.29 | 2.33E-02 |
| Cuedc1     | 200   | -2.81 | -1.49 | 4.97E-03 |

|               |       |       |       |          |
|---------------|-------|-------|-------|----------|
| Cuedc2        | 5327  | -1.14 | -0.19 | 1.54E-02 |
| Cux1          | 12750 | -1.27 | -0.35 | 2.56E-03 |
| Cxxc4         | 8281  | -1.32 | -0.40 | 1.76E-02 |
| Cyp2d22       | 450   | 1.36  | 0.45  | 4.99E-03 |
| Dazap2        | 8566  | -1.18 | -0.24 | 2.05E-02 |
| Dbnl          | 6405  | -1.15 | -0.20 | 1.78E-02 |
| Dcakd         | 8709  | -1.26 | -0.34 | 8.18E-03 |
| Dcp2          | 12662 | 1.27  | 0.35  | 6.86E-04 |
| Dctd          | 1384  | -1.27 | -0.35 | 1.33E-02 |
| Ddx23         | 8925  | -1.24 | -0.31 | 8.20E-04 |
| Ddx56         | 2894  | -1.23 | -0.30 | 4.78E-04 |
| Dennd1a       | 3407  | -1.17 | -0.23 | 1.35E-02 |
| Diablo        | 756   | 1.27  | 0.34  | 1.10E-02 |
| Dlgap5        | 3503  | -1.44 | -0.52 | 6.63E-03 |
| Dll1          | 4795  | -1.45 | -0.54 | 1.69E-02 |
| Dlx1          | 5903  | -2.29 | -1.19 | 2.02E-02 |
| Dmap1         | 2240  | -1.14 | -0.19 | 1.73E-02 |
| Dmd           | 2433  | 1.24  | 0.31  | 2.01E-02 |
| Dmxl1         | 7691  | 1.56  | 0.65  | 1.04E-03 |
| Dmxl2         | 9776  | 1.49  | 0.57  | 2.21E-02 |
| Dnajc30       | 931   | -1.17 | -0.22 | 5.24E-04 |
| Dnttip1       | 2157  | -1.16 | -0.21 | 1.56E-02 |
| Dpp9          | 4589  | -1.30 | -0.38 | 5.91E-03 |
| Dram2         | 2528  | 1.19  | 0.25  | 1.36E-03 |
| Drosha        | 11946 | -1.18 | -0.24 | 1.22E-02 |
| Dtx2          | 1336  | -1.20 | -0.27 | 1.27E-02 |
| Dusp12        | 1723  | -1.11 | -0.15 | 9.41E-03 |
| Dzip3         | 13882 | 1.21  | 0.27  | 1.98E-02 |
| E130309D02Rik | 2040  | -1.32 | -0.40 | 1.37E-03 |
| Ece2          | 235   | -1.48 | -0.57 | 2.30E-02 |
| Ecm1          | 556   | -1.38 | -0.46 | 4.06E-03 |
| Eef2kmt       | 453   | -1.31 | -0.39 | 1.42E-03 |
| Eif2b1        | 2850  | -1.22 | -0.28 | 8.64E-03 |
| Eif2b4        | 2400  | -1.14 | -0.19 | 1.24E-02 |
| Eif3d         | 10087 | -1.15 | -0.21 | 1.99E-02 |
| Eif4e2        | 7107  | -1.13 | -0.18 | 1.76E-03 |
| Eif4e3        | 838   | -1.26 | -0.33 | 1.41E-03 |
| Eif4enif1     | 7426  | -1.11 | -0.14 | 2.44E-02 |
| Eif4h         | 24292 | -1.21 | -0.28 | 7.54E-03 |
| Elmod2        | 5783  | 1.21  | 0.28  | 9.14E-04 |
| Emb           | 1344  | -1.48 | -0.57 | 8.14E-03 |
| Enkur         | 209   | 1.36  | 0.45  | 5.38E-03 |
| Enpp2         | 3719  | 1.58  | 0.66  | 2.98E-03 |
| Epm2aip1      | 16521 | 1.27  | 0.35  | 1.57E-02 |
| Ercc1         | 1776  | -1.19 | -0.25 | 9.33E-03 |
| Ess2          | 2744  | -1.18 | -0.24 | 1.20E-03 |
| Etv6          | 2568  | -1.25 | -0.32 | 1.05E-02 |

|         |       |       |       |          |
|---------|-------|-------|-------|----------|
| Exoc3l  | 371   | -1.28 | -0.36 | 5.03E-03 |
| Exosc4  | 1273  | -1.17 | -0.23 | 3.88E-03 |
| Exph5   | 106   | 2.79  | 1.48  | 5.45E-04 |
| Fam120c | 2059  | 1.52  | 0.61  | 1.43E-03 |
| Fam126b | 2939  | 1.47  | 0.55  | 2.34E-04 |
| Fam3c   | 2442  | -1.18 | -0.24 | 5.94E-03 |
| Fam53b  | 2458  | -1.23 | -0.30 | 2.19E-02 |
| Fam71e1 | 593   | -1.32 | -0.40 | 2.67E-03 |
| Fbll1   | 556   | 1.56  | 0.65  | 7.59E-03 |
| Fbxo5   | 2579  | -1.44 | -0.53 | 4.22E-03 |
| Fbxw5   | 3978  | -1.15 | -0.20 | 7.54E-03 |
| Fer     | 2828  | 1.32  | 0.40  | 3.87E-03 |
| Fezf1   | 950   | -1.68 | -0.75 | 2.34E-02 |
| Fign    | 2202  | -1.48 | -0.57 | 2.00E-03 |
| Fkbp10  | 2887  | -1.56 | -0.64 | 2.47E-02 |
| Fkbp15  | 3728  | 1.18  | 0.24  | 4.95E-03 |
| Flnb    | 14801 | 1.35  | 0.43  | 1.69E-02 |
| Flrt1   | 1229  | 1.42  | 0.50  | 1.83E-02 |
| Fnbp4   | 11381 | -1.10 | -0.14 | 2.05E-02 |
| Frem2   | 2619  | 1.67  | 0.74  | 2.48E-02 |
| Fut8    | 3711  | -1.10 | -0.14 | 1.45E-02 |
| Fzd1    | 5399  | -1.29 | -0.36 | 3.56E-03 |
| Fzd4    | 1743  | 1.51  | 0.59  | 1.72E-02 |
| Gar1    | 2245  | -1.49 | -0.58 | 9.28E-03 |
| Garre1  | 5078  | 1.15  | 0.20  | 7.95E-03 |
| Gatc    | 2143  | -1.17 | -0.23 | 5.02E-03 |
| Gbx2    | 808   | -1.60 | -0.68 | 7.24E-03 |
| Gfpt1   | 11453 | 1.24  | 0.31  | 3.27E-03 |
| Gimap9  | 145   | -1.53 | -0.61 | 2.12E-02 |
| Gls     | 15431 | 1.22  | 0.28  | 1.43E-02 |
| Gm14226 | 120   | -5.48 | -2.45 | 5.46E-03 |
| Gm14295 | 427   | 1.60  | 0.68  | 8.80E-05 |
| Gm14305 | 808   | 1.35  | 0.43  | 2.06E-03 |
| Gm14434 | 151   | -6.98 | -2.80 | 7.78E-03 |
| Gm29666 | 380   | 1.23  | 0.30  | 9.35E-03 |
| Gnl3    | 4724  | -1.20 | -0.27 | 1.59E-02 |
| Gpatch4 | 1842  | -1.19 | -0.25 | 2.00E-02 |
| Gps2    | 2670  | -1.30 | -0.37 | 1.33E-03 |
| Grap    | 295   | -1.23 | -0.30 | 4.01E-03 |
| Gripap1 | 6532  | -1.16 | -0.22 | 1.43E-02 |
| Grwd1   | 1719  | -1.25 | -0.32 | 8.77E-03 |
| Gstm7   | 2431  | -1.25 | -0.32 | 2.08E-02 |
| Gtf2h4  | 1146  | -1.19 | -0.26 | 2.05E-02 |
| Helt    | 223   | -1.97 | -0.97 | 1.15E-02 |
| Herc1   | 24022 | 1.49  | 0.57  | 8.91E-03 |
| Herc2   | 19070 | 1.44  | 0.53  | 9.32E-03 |
| Hes6    | 5117  | -1.32 | -0.40 | 5.58E-03 |

|          |        |        |        |          |
|----------|--------|--------|--------|----------|
| Hey1     | 2557   | -1.29  | -0.37  | 6.62E-03 |
| Hmgn1    | 28667  | -1.19  | -0.25  | 2.02E-02 |
| Hnrnpa1  | 138907 | -1.23  | -0.29  | 1.69E-02 |
| Hoxa5    | 237    | -60.93 | -5.93  | 1.77E-03 |
| Hoxb5    | 211    | <-100  | -10.05 | 1.41E-03 |
| Hoxb8    | 170    | -78.71 | -6.30  | 7.01E-03 |
| Hoxc4    | 154    | -35.79 | -5.16  | 1.80E-03 |
| Hsd11b2  | 605    | -1.75  | -0.81  | 2.29E-03 |
| Hsp90ab1 | 180217 | -1.17  | -0.23  | 2.10E-02 |
| Hspa12a  | 6876   | 1.49   | 0.57   | 2.28E-03 |
| Hspa4l   | 361    | 1.75   | 0.81   | 7.11E-03 |
| Htra3    | 383    | -1.55  | -0.63  | 1.84E-03 |
| Ier5l    | 941    | -1.23  | -0.30  | 1.47E-02 |
| Igdcc3   | 2075   | -1.90  | -0.93  | 2.22E-03 |
| Ikzf2    | 1166   | 1.33   | 0.41   | 1.52E-03 |
| Irf2bp2  | 2311   | -1.34  | -0.43  | 9.80E-04 |
| Irs1     | 5806   | -1.21  | -0.28  | 7.51E-03 |
| Irx6     | 135    | -1.46  | -0.55  | 2.06E-02 |
| Jak2     | 6870   | 1.22   | 0.29   | 2.49E-02 |
| Josd2    | 1870   | -1.20  | -0.26  | 1.04E-02 |
| Kank2    | 2603   | -1.34  | -0.42  | 1.23E-02 |
| Kbtbd3   | 582    | 1.24   | 0.31   | 1.25E-02 |
| Kcnip3   | 820    | -1.34  | -0.42  | 2.37E-02 |
| Kcnn2    | 633    | 1.39   | 0.47   | 3.12E-03 |
| Kctd2    | 2701   | -1.16  | -0.21  | 5.90E-04 |
| Kdm5a    | 11814  | 1.23   | 0.30   | 1.26E-02 |
| Kif2c    | 4226   | -1.49  | -0.57  | 2.84E-03 |
| Kif3a    | 10207  | 1.20   | 0.27   | 2.22E-02 |
| Klf2     | 278    | -1.41  | -0.50  | 1.61E-02 |
| Krit1    | 9029   | 1.20   | 0.26   | 2.17E-03 |
| Laptm5   | 867    | -1.28  | -0.36  | 1.76E-02 |
| Lca5l    | 269    | 1.18   | 0.24   | 2.19E-02 |
| Lcp1     | 2352   | -1.20  | -0.26  | 1.35E-02 |
| Lemd2    | 3723   | -1.23  | -0.30  | 2.73E-03 |
| Lifr     | 2809   | 1.39   | 0.48   | 2.47E-02 |
| Lipg     | 768    | 1.32   | 0.40   | 6.58E-03 |
| Lmnb1    | 28472  | -1.47  | -0.56  | 2.34E-03 |
| Lrig1    | 4799   | 1.21   | 0.27   | 9.75E-03 |
| Lrig2    | 5794   | 1.19   | 0.25   | 1.15E-02 |
| Lrrc57   | 1466   | -1.12  | -0.17  | 1.04E-02 |
| Lrrc8a   | 739    | -1.47  | -0.56  | 3.37E-04 |
| Lrrtm2   | 1399   | 1.57   | 0.65   | 2.46E-02 |
| Lsm2     | 2197   | -1.33  | -0.41  | 1.52E-02 |
| Lsm4     | 1198   | -1.48  | -0.56  | 1.78E-03 |
| Lsm7     | 2165   | -1.23  | -0.30  | 2.04E-02 |
| Ltn1     | 7740   | 1.22   | 0.29   | 1.06E-02 |
| Lurap1l  | 363    | 1.32   | 0.40   | 2.33E-03 |

|          |       |       |       |          |
|----------|-------|-------|-------|----------|
| Maf1     | 5688  | -1.18 | -0.24 | 5.51E-03 |
| Man1a    | 1331  | 1.55  | 0.64  | 4.33E-03 |
| Mcm7     | 14806 | -1.35 | -0.43 | 7.63E-03 |
| Meak7    | 1038  | -1.15 | -0.21 | 5.38E-03 |
| Med15    | 3114  | -1.20 | -0.26 | 2.55E-03 |
| Mief1    | 3469  | -1.14 | -0.19 | 5.34E-03 |
| Mmp15    | 3767  | -1.30 | -0.37 | 1.17E-02 |
| Mmp28    | 545   | -1.29 | -0.37 | 1.44E-02 |
| Mrgbp    | 2766  | -1.14 | -0.19 | 1.02E-02 |
| Mrpl1    | 1564  | -1.15 | -0.20 | 5.64E-03 |
| Mrps14   | 2050  | -1.22 | -0.29 | 1.70E-02 |
| Mrps21   | 2087  | -1.28 | -0.36 | 1.85E-02 |
| Mrps27   | 2039  | -1.23 | -0.30 | 7.24E-03 |
| Mst1r    | 351   | 1.38  | 0.46  | 1.96E-02 |
| Msto1    | 1681  | -1.17 | -0.22 | 1.57E-02 |
| Msx3     | 432   | 3.03  | 1.60  | 1.58E-03 |
| Mto1     | 1246  | -1.18 | -0.24 | 1.77E-03 |
| Muc1     | 686   | -1.41 | -0.49 | 4.24E-03 |
| Mybbp1a  | 13803 | -1.21 | -0.27 | 1.65E-02 |
| Mycbp2   | 22103 | 1.50  | 0.58  | 1.28E-02 |
| Mycl     | 7030  | -1.15 | -0.21 | 2.43E-02 |
| Mynn     | 3581  | 1.15  | 0.20  | 5.64E-03 |
| Myo9a    | 12240 | 1.34  | 0.42  | 2.22E-02 |
| Naa10    | 1102  | -1.28 | -0.36 | 3.16E-03 |
| Naa12    | 5122  | -1.13 | -0.17 | 8.69E-03 |
| Naa25    | 6315  | 1.13  | 0.17  | 1.15E-02 |
| Naa38    | 767   | -1.35 | -0.43 | 1.44E-03 |
| Nacc1    | 8224  | -1.29 | -0.37 | 3.23E-03 |
| Nacc2    | 1438  | -1.24 | -0.31 | 1.05E-02 |
| Napb     | 4916  | 1.37  | 0.46  | 8.70E-03 |
| Naxe     | 2417  | -1.12 | -0.16 | 7.47E-03 |
| Ndufa4l2 | 123   | -1.50 | -0.58 | 1.65E-03 |
| Ndufab1  | 3977  | -1.16 | -0.22 | 1.45E-02 |
| Ndufb2   | 1044  | -1.17 | -0.23 | 2.46E-02 |
| Necab2   | 1384  | -1.18 | -0.24 | 2.49E-02 |
| Nell2    | 9177  | -1.29 | -0.37 | 1.08E-02 |
| Neurog2  | 6066  | -1.66 | -0.73 | 1.33E-02 |
| Nfat5    | 15255 | 1.34  | 0.42  | 6.02E-03 |
| Nktr     | 23629 | 1.37  | 0.45  | 4.76E-03 |
| Nkx2-1   | 2086  | -2.46 | -1.30 | 8.65E-03 |
| Nkx2-2   | 355   | -1.77 | -0.82 | 1.63E-02 |
| Nkx2-4   | 120   | -2.42 | -1.28 | 8.69E-05 |
| Nob1     | 2867  | -1.16 | -0.21 | 6.33E-03 |
| Noc3l    | 3626  | 1.15  | 0.21  | 2.05E-02 |
| Nr2f2    | 13726 | -1.61 | -0.69 | 1.85E-04 |
| Nsun5    | 1428  | -1.18 | -0.24 | 2.01E-03 |
| Nudt5    | 3718  | -1.26 | -0.33 | 7.21E-03 |

|          |       |       |       |          |
|----------|-------|-------|-------|----------|
| Nup153   | 12606 | 1.16  | 0.21  | 2.33E-02 |
| Nynrin   | 11471 | -1.25 | -0.32 | 1.70E-02 |
| Oard1    | 461   | -2.32 | -1.22 | 1.80E-02 |
| Oxnad1   | 1334  | -1.13 | -0.18 | 1.70E-02 |
| Pacc1    | 1723  | -1.13 | -0.18 | 8.63E-03 |
| Pacrg    | 255   | 1.26  | 0.34  | 2.09E-02 |
| Padi2    | 216   | 2.64  | 1.40  | 6.41E-04 |
| Pafah1b3 | 6793  | -1.17 | -0.22 | 2.37E-02 |
| Pak1     | 11100 | -1.24 | -0.31 | 6.32E-03 |
| Pbk      | 4745  | -1.41 | -0.50 | 1.13E-02 |
| Pcmtd1   | 6739  | 1.24  | 0.32  | 7.12E-03 |
| Pcmtd2   | 6862  | 1.19  | 0.25  | 1.11E-02 |
| Pcolce   | 1711  | -2.09 | -1.06 | 2.17E-02 |
| Pcyox1l  | 1502  | -1.28 | -0.36 | 8.46E-03 |
| Pdcd6    | 3322  | 1.21  | 0.27  | 6.72E-03 |
| Pdgrl    | 232   | -1.61 | -0.69 | 1.62E-02 |
| Pdlim3   | 637   | -1.54 | -0.62 | 2.04E-03 |
| Pelp1    | 4608  | -1.30 | -0.37 | 7.65E-03 |
| Pex14    | 1641  | -1.15 | -0.20 | 1.05E-02 |
| Pgl      | 2632  | -1.17 | -0.23 | 4.10E-03 |
| Phc1     | 9754  | -1.17 | -0.23 | 7.76E-03 |
| Phc3     | 6851  | 1.39  | 0.48  | 1.33E-03 |
| Piezo1   | 2339  | -1.48 | -0.57 | 2.32E-02 |
| Pik3ca   | 10244 | 1.17  | 0.23  | 1.55E-02 |
| Pir      | 156   | -1.50 | -0.58 | 1.62E-02 |
| Plekhj1  | 2296  | -1.24 | -0.31 | 7.14E-03 |
| Poll     | 949   | -1.27 | -0.34 | 1.08E-02 |
| Polr3f   | 4653  | 1.14  | 0.19  | 2.04E-02 |
| Pomc     | 169   | -2.03 | -1.02 | 8.22E-05 |
| Pou2f2   | 4785  | -1.47 | -0.56 | 2.00E-02 |
| Ppfia4   | 1710  | 1.59  | 0.67  | 2.58E-03 |
| Ppip5k1  | 2203  | 1.18  | 0.24  | 2.15E-02 |
| Ppp1r18  | 5100  | -1.23 | -0.30 | 7.38E-03 |
| Ppp1r3c  | 679   | 1.55  | 0.63  | 2.07E-02 |
| Ppp1r8   | 5668  | -1.18 | -0.24 | 1.21E-02 |
| Ppp2r1a  | 24678 | -1.17 | -0.23 | 2.20E-03 |
| Ppp4c    | 6694  | -1.18 | -0.24 | 1.55E-02 |
| Prmt7    | 3820  | -1.17 | -0.23 | 7.25E-04 |
| Prr12    | 7437  | -1.48 | -0.57 | 4.95E-03 |
| Prtn3    | 272   | -1.25 | -0.32 | 1.00E-02 |
| Psenen   | 1893  | -1.22 | -0.29 | 1.38E-02 |
| Psmb6    | 8970  | -1.22 | -0.29 | 2.64E-03 |
| Psmc5    | 8309  | -1.25 | -0.32 | 2.05E-03 |
| Psmg3    | 334   | -1.26 | -0.34 | 1.95E-02 |
| Psmg4    | 775   | -1.38 | -0.47 | 1.07E-03 |
| Psph     | 1024  | -1.25 | -0.32 | 2.10E-03 |
| Ptar1    | 7591  | 1.23  | 0.30  | 5.80E-03 |



|           |       |       |       |          |
|-----------|-------|-------|-------|----------|
| Ptov1     | 17233 | -1.22 | -0.29 | 1.54E-02 |
| Pygl      | 778   | 1.37  | 0.46  | 9.97E-03 |
| Qpct      | 375   | 1.28  | 0.36  | 2.31E-02 |
| Qrfprl    | 164   | -1.63 | -0.71 | 2.49E-02 |
| Rab30     | 4492  | 1.28  | 0.36  | 7.00E-03 |
| Rad54b    | 1711  | -1.30 | -0.37 | 9.44E-03 |
| Rapgef6   | 5276  | 1.32  | 0.40  | 1.08E-02 |
| Rbm12b2   | 2733  | 1.15  | 0.20  | 2.00E-02 |
| Rbm6      | 14500 | -1.12 | -0.16 | 9.93E-03 |
| Rc3h1     | 6268  | 1.13  | 0.18  | 1.60E-02 |
| Rce1      | 1327  | -1.15 | -0.21 | 1.54E-02 |
| Rcor2     | 9542  | -1.48 | -0.56 | 2.03E-03 |
| Rexo5     | 1339  | 1.26  | 0.34  | 1.16E-02 |
| Rfc3      | 3153  | -1.29 | -0.37 | 3.77E-03 |
| Rflnb     | 2048  | 1.41  | 0.50  | 1.98E-02 |
| Rho       | 101   | 1.40  | 0.49  | 1.24E-02 |
| Rhob      | 6351  | -1.25 | -0.32 | 4.54E-03 |
| Ric8b     | 4244  | 1.09  | 0.12  | 2.50E-02 |
| Riok3     | 10080 | 1.11  | 0.15  | 2.49E-02 |
| Rmi2      | 515   | -1.42 | -0.50 | 2.31E-02 |
| Rnf19a    | 5179  | 1.15  | 0.20  | 1.50E-02 |
| Rnf220    | 6619  | -1.19 | -0.25 | 1.33E-02 |
| Rnf25     | 2639  | -1.12 | -0.17 | 1.77E-03 |
| Rnf32     | 651   | 1.31  | 0.39  | 8.25E-04 |
| Rnf44     | 9449  | -1.40 | -0.49 | 2.21E-03 |
| Rock1     | 8388  | 1.17  | 0.22  | 4.44E-03 |
| Rock2     | 10892 | 1.28  | 0.36  | 1.74E-04 |
| Rpl13a    | 1404  | -1.30 | -0.38 | 2.33E-02 |
| Rpl7l1    | 7184  | -1.29 | -0.36 | 7.48E-04 |
| Rpusd4    | 998   | -1.23 | -0.30 | 1.57E-03 |
| Rrad      | 117   | 1.68  | 0.75  | 1.29E-02 |
| Rrnad1    | 3110  | -1.16 | -0.21 | 4.72E-03 |
| Ruvbl1    | 4144  | -1.21 | -0.28 | 2.17E-02 |
| Sacs      | 9029  | 1.44  | 0.53  | 2.30E-02 |
| Sash1     | 3853  | 1.18  | 0.24  | 1.98E-02 |
| Sec22a    | 2051  | 1.17  | 0.22  | 2.32E-02 |
| Sec61a2   | 6520  | 1.15  | 0.20  | 2.03E-02 |
| Secisbp2l | 9900  | 1.17  | 0.23  | 7.13E-03 |
| Selenot   | 10483 | -1.18 | -0.24 | 5.51E-03 |
| Sema4b    | 1776  | -1.24 | -0.31 | 7.90E-03 |
| Sema5b    | 5244  | -1.44 | -0.52 | 8.05E-03 |
| Setx      | 15624 | 1.25  | 0.33  | 2.47E-02 |
| Sf3a2     | 3635  | -1.48 | -0.57 | 2.44E-03 |
| Sf3a3     | 7195  | -1.25 | -0.33 | 1.47E-02 |
| Sh3gl3    | 1221  | 1.33  | 0.41  | 1.08E-03 |
| Sim1      | 1200  | -1.41 | -0.50 | 2.22E-02 |
| Sinhcaf   | 7080  | -1.33 | -0.41 | 9.77E-03 |

|          |       |       |       |          |
|----------|-------|-------|-------|----------|
| Six4     | 1023  | 1.43  | 0.51  | 2.45E-02 |
| Skil     | 8411  | 1.16  | 0.21  | 1.69E-02 |
| Slain2   | 5334  | -1.15 | -0.20 | 8.86E-03 |
| Slc16a10 | 949   | 1.45  | 0.54  | 1.40E-02 |
| Slc16a13 | 975   | -1.23 | -0.30 | 6.52E-04 |
| Slc1a1   | 879   | 1.70  | 0.77  | 2.18E-02 |
| Slc25a36 | 10791 | 1.23  | 0.29  | 3.37E-03 |
| Slc25a40 | 1936  | 1.23  | 0.30  | 4.00E-03 |
| Slc35b1  | 4144  | -1.13 | -0.17 | 1.35E-02 |
| Slc3a2   | 4594  | -1.16 | -0.22 | 2.81E-03 |
| Slc4a8   | 5501  | 1.48  | 0.56  | 1.28E-02 |
| Smad7    | 788   | -1.25 | -0.32 | 1.20E-02 |
| Smarcd3  | 5057  | -1.31 | -0.39 | 1.51E-02 |
| Smdt1    | 3229  | -1.24 | -0.31 | 5.15E-03 |
| Smndc1   | 4434  | -1.24 | -0.31 | 7.76E-03 |
| Snrnp70  | 33965 | -1.29 | -0.37 | 3.86E-03 |
| Snrpd1   | 9050  | -1.27 | -0.35 | 1.11E-02 |
| Sox11    | 64358 | -1.53 | -0.62 | 4.59E-03 |
| Sox2     | 10110 | -1.50 | -0.58 | 2.36E-02 |
| Spdl1    | 1584  | -1.38 | -0.47 | 1.71E-02 |
| Spred2   | 2422  | -1.28 | -0.35 | 4.05E-03 |
| Sptan1   | 69080 | 1.42  | 0.51  | 2.96E-03 |
| Srp68    | 6240  | -1.20 | -0.27 | 8.62E-04 |
| Srpr     | 5578  | -1.19 | -0.25 | 1.83E-02 |
| Srrt     | 15369 | -1.33 | -0.41 | 1.42E-03 |
| Stard9   | 3691  | 1.63  | 0.70  | 5.50E-03 |
| Stk24    | 3981  | -1.14 | -0.19 | 4.89E-03 |
| Strip1   | 10609 | -1.12 | -0.16 | 2.03E-02 |
| Styk1    | 115   | -1.58 | -0.66 | 7.09E-04 |
| Supt20   | 9397  | 1.07  | 0.10  | 1.08E-02 |
| Surf6    | 2709  | -1.13 | -0.17 | 1.68E-02 |
| Suv39h1  | 5175  | -1.24 | -0.31 | 2.05E-03 |
| Szrd1    | 6855  | -1.27 | -0.34 | 7.77E-03 |
| Tac1     | 479   | 1.44  | 0.53  | 6.44E-03 |
| Tbc1d23  | 4906  | 1.19  | 0.25  | 6.88E-03 |
| Tbc1d25  | 920   | 1.14  | 0.20  | 2.03E-02 |
| Tbpl1    | 6051  | -1.20 | -0.26 | 1.98E-03 |
| Tent5a   | 1570  | -1.27 | -0.35 | 2.20E-02 |
| Tes      | 3225  | 1.42  | 0.51  | 2.48E-02 |
| Tesk1    | 3448  | -1.24 | -0.31 | 8.72E-03 |
| Tex15    | 2197  | 1.99  | 0.99  | 5.54E-03 |
| Tfg      | 7142  | -1.12 | -0.16 | 2.28E-02 |
| Thbs2    | 2507  | -2.51 | -1.33 | 2.10E-02 |
| Them4    | 1096  | 1.44  | 0.53  | 7.58E-03 |
| Thoc2l   | 6347  | 1.26  | 0.34  | 1.63E-03 |
| Tie1     | 2207  | -1.31 | -0.39 | 5.20E-03 |
| Tigd3    | 703   | -1.25 | -0.32 | 9.34E-03 |

|          |       |       |       |          |
|----------|-------|-------|-------|----------|
| Tlcd4    | 600   | 1.50  | 0.59  | 4.26E-04 |
| Tle3     | 8820  | -1.37 | -0.46 | 4.75E-03 |
| Tmc3     | 117   | 2.71  | 1.44  | 2.01E-03 |
| Tmeff2   | 1739  | 1.71  | 0.77  | 9.80E-03 |
| Tmem101  | 1474  | -1.23 | -0.30 | 2.57E-03 |
| Tmem11   | 1619  | -1.19 | -0.25 | 1.34E-02 |
| Tmem177  | 1273  | 1.18  | 0.24  | 8.42E-03 |
| Tmem219  | 718   | -1.20 | -0.27 | 4.95E-03 |
| Tmem234  | 5705  | -1.20 | -0.26 | 1.13E-03 |
| Tmem67   | 2300  | 1.15  | 0.21  | 7.20E-03 |
| Tom1l1   | 1576  | 1.26  | 0.33  | 1.48E-02 |
| Tra2a    | 28189 | 1.13  | 0.17  | 2.23E-02 |
| Trim28   | 31719 | -1.27 | -0.35 | 2.90E-03 |
| Trim46   | 3338  | -1.42 | -0.51 | 2.36E-02 |
| Trmt61a  | 927   | -1.33 | -0.41 | 1.31E-02 |
| Trp53i11 | 11166 | -1.29 | -0.37 | 2.31E-02 |
| Tstd2    | 4425  | -1.11 | -0.15 | 1.40E-02 |
| Ttc8     | 1988  | -1.14 | -0.19 | 2.19E-02 |
| Tuba1b   | 31678 | -1.33 | -0.41 | 5.86E-03 |
| Txn2     | 4601  | -1.20 | -0.26 | 1.65E-03 |
| Tyrobp   | 214   | -1.36 | -0.45 | 1.20E-02 |
| Ubash3b  | 2278  | 1.33  | 0.41  | 1.51E-02 |
| Ubb      | 56162 | -1.14 | -0.19 | 2.41E-03 |
| Ube2q1   | 8249  | -1.16 | -0.21 | 1.80E-03 |
| Ubqln2   | 14660 | -1.30 | -0.38 | 1.29E-02 |
| Ubxn10   | 241   | 1.41  | 0.50  | 2.75E-03 |
| Usp16    | 4941  | 1.14  | 0.19  | 1.89E-02 |
| Usp19    | 12383 | -1.17 | -0.23 | 1.41E-02 |
| Vax1     | 273   | -2.24 | -1.16 | 1.35E-02 |
| Vgl4     | 4141  | -1.14 | -0.19 | 2.14E-02 |
| Vps13c   | 5813  | 1.66  | 0.73  | 8.25E-04 |
| Vps4b    | 6196  | 1.17  | 0.23  | 1.24E-02 |
| Vsig10   | 507   | -1.48 | -0.57 | 8.74E-04 |
| Vwf      | 2227  | -1.44 | -0.52 | 1.62E-02 |
| Washc2   | 8354  | 1.11  | 0.14  | 1.16E-02 |
| Wbp11    | 7481  | -1.28 | -0.36 | 1.04E-02 |
| Wdr24    | 1815  | -1.15 | -0.20 | 1.22E-02 |
| Wdr33    | 7608  | -1.10 | -0.14 | 3.51E-03 |
| Wdr6     | 28810 | -1.29 | -0.37 | 2.10E-03 |
| Wdr66    | 293   | 1.41  | 0.49  | 1.19E-02 |
| Wdr83    | 2149  | -1.21 | -0.27 | 3.56E-04 |
| Wfdc2    | 300   | -1.60 | -0.67 | 9.48E-03 |
| Wnk1     | 29420 | 1.18  | 0.24  | 9.23E-03 |
| Wnt3     | 639   | -1.37 | -0.45 | 5.34E-03 |
| Wnt8b    | 1393  | -2.15 | -1.10 | 4.50E-03 |
| Xpnpep2  | 212   | -1.96 | -0.97 | 5.20E-03 |
| Yae1d1   | 4139  | 1.25  | 0.32  | 3.26E-03 |

|          |       |       |       |          |
|----------|-------|-------|-------|----------|
| Ythdc1   | 10887 | -1.17 | -0.22 | 1.81E-02 |
| Zbtb49   | 1302  | 1.22  | 0.29  | 6.58E-04 |
| Zcchc3   | 2879  | -1.41 | -0.50 | 2.00E-03 |
| Zdhhc2   | 3149  | -1.30 | -0.37 | 4.56E-03 |
| Zfp106   | 19891 | 1.20  | 0.26  | 1.97E-02 |
| Zfp263   | 3439  | -1.09 | -0.12 | 9.68E-03 |
| Zfp354b  | 247   | 1.31  | 0.39  | 1.74E-02 |
| Zfp385b  | 211   | -1.56 | -0.64 | 7.35E-03 |
| Zfp398   | 4267  | 1.29  | 0.37  | 6.26E-03 |
| Zfp442   | 518   | 1.52  | 0.61  | 1.67E-02 |
| Zfp458   | 642   | 1.32  | 0.40  | 1.93E-02 |
| Zfp553   | 4181  | -1.40 | -0.49 | 2.60E-03 |
| Zfp58    | 536   | 1.13  | 0.18  | 1.22E-02 |
| Zfp607b  | 1626  | 1.28  | 0.36  | 6.65E-03 |
| Zfp677   | 477   | 1.25  | 0.32  | 1.59E-02 |
| Zfp712   | 879   | 1.27  | 0.35  | 1.64E-03 |
| Zfp758   | 1147  | 1.19  | 0.25  | 3.34E-03 |
| Zfp768   | 2361  | -1.19 | -0.26 | 2.31E-02 |
| Zfp780b  | 2358  | 1.16  | 0.22  | 8.06E-03 |
| Zfp790   | 2580  | 1.20  | 0.26  | 4.51E-03 |
| Zfp93    | 770   | -1.18 | -0.24 | 5.56E-03 |
| Zfp940   | 1471  | 1.18  | 0.23  | 1.11E-02 |
| Zfp976   | 813   | 1.24  | 0.30  | 5.20E-03 |
| Zic1     | 19643 | -1.33 | -0.41 | 8.79E-04 |
| Zic2     | 6033  | -1.38 | -0.47 | 1.67E-03 |
| Zkscan17 | 2963  | -1.31 | -0.39 | 3.64E-03 |
| Zkscan3  | 11708 | 1.15  | 0.21  | 1.76E-03 |
| Zkscan7  | 2134  | 1.09  | 0.13  | 1.60E-02 |
| Zzef1    | 6975  | 1.47  | 0.56  | 1.70E-03 |

| Gene          | Counts | FC    | LFC   | padj    |
|---------------|--------|-------|-------|---------|
| 1700029I15Rik | 104    | 1.32  | 0.40  | 4.0E-03 |
| 2610318N02Rik | 2168   | 1.46  | 0.55  | 2.4E-02 |
| 4933430I17Rik | 225    | 1.38  | 0.46  | 4.2E-03 |
| A630089N07Rik | 910    | -1.38 | -0.47 | 4.7E-04 |
| Abca1         | 5507   | -1.42 | -0.50 | 1.3E-02 |
| Adamts16      | 233    | -2.05 | -1.04 | 6.3E-03 |
| Adamts17      | 919    | -1.79 | -0.84 | 1.8E-02 |
| Adamts9       | 1803   | -1.76 | -0.82 | 4.7E-03 |
| Adcy2         | 689    | -1.49 | -0.58 | 7.9E-03 |
| Afap1         | 7205   | -1.26 | -0.33 | 2.4E-02 |
| Agbl3         | 727    | -1.32 | -0.40 | 2.2E-03 |
| Aif1          | 113    | -1.49 | -0.57 | 2.7E-04 |
| Akt3          | 13712  | -1.30 | -0.38 | 5.6E-03 |
| Alad          | 1636   | 1.26  | 0.34  | 3.9E-03 |
| Alg6          | 112    | -1.80 | -0.85 | 1.4E-02 |
| Alkbh2        | 322    | 1.37  | 0.45  | 1.5E-04 |
| Alkbh7        | 518    | 1.25  | 0.32  | 2.2E-03 |
| Alox12        | 123    | -1.71 | -0.78 | 2.0E-02 |
| Anxa11        | 287    | 1.79  | 0.84  | 8.5E-03 |
| Ap4e1         | 2597   | -1.32 | -0.40 | 8.6E-04 |
| Arhgap5       | 12703  | -1.27 | -0.34 | 1.5E-02 |
| Arhgef6       | 855    | -1.49 | -0.58 | 3.7E-04 |
| Atf7          | 3263   | -1.26 | -0.34 | 4.8E-03 |
| Atp2a1        | 197    | -6.61 | -2.73 | 3.5E-03 |
| Begain        | 1390   | -1.41 | -0.49 | 2.1E-02 |
| Btrc          | 4169   | -1.32 | -0.40 | 1.2E-03 |
| C1ql3         | 219    | -2.20 | -1.14 | 1.2E-03 |
| Cacnb4        | 2101   | -1.68 | -0.75 | 3.9E-03 |
| Capn11        | 223    | 4.18  | 2.06  | 2.4E-02 |
| Car11         | 1095   | -1.38 | -0.46 | 1.8E-02 |
| Casq1         | 141    | -1.82 | -0.86 | 2.8E-03 |
| Cby1          | 2843   | 1.25  | 0.33  | 1.9E-03 |
| Ccdc120       | 1927   | 1.27  | 0.34  | 1.3E-02 |
| Ccdc141       | 708    | -1.65 | -0.73 | 6.9E-03 |
| Ccdc86        | 1231   | 1.25  | 0.32  | 2.4E-02 |
| Ccnd3         | 6546   | 1.34  | 0.42  | 2.0E-02 |
| Cdc25c        | 3169   | 1.44  | 0.53  | 7.3E-03 |
| Cdc34         | 3392   | 1.30  | 0.38  | 2.1E-02 |
| Cdc6          | 2717   | 1.52  | 0.60  | 3.7E-03 |
| Cdh12         | 230    | -1.72 | -0.78 | 6.1E-03 |
| Cdh15         | 136    | -4.45 | -2.15 | 6.9E-03 |
| Cdh6          | 3723   | -1.32 | -0.40 | 1.6E-04 |
| Cdh7          | 1176   | -1.35 | -0.44 | 8.4E-03 |
| Cenph         | 1962   | 1.40  | 0.49  | 2.0E-02 |
| Cep131        | 4405   | 1.32  | 0.40  | 9.3E-03 |
| Cfap57        | 159    | -1.44 | -0.53 | 2.7E-03 |

|               |       |       |       |         |
|---------------|-------|-------|-------|---------|
| Chaf1a        | 7134  | 1.39  | 0.48  | 1.0E-02 |
| Chl1          | 10632 | -1.81 | -0.86 | 1.7E-02 |
| Chm           | 3554  | -1.32 | -0.40 | 1.9E-04 |
| Clp1          | 1725  | 1.31  | 0.39  | 2.2E-02 |
| Cox16         | 107   | -1.35 | -0.43 | 2.5E-02 |
| Cox20         | 140   | -3.59 | -1.84 | 1.0E-02 |
| Cplane1       | 6998  | -1.35 | -0.43 | 3.0E-03 |
| Crybg3        | 1826  | -1.65 | -0.73 | 8.6E-04 |
| Cubn          | 187   | -1.49 | -0.57 | 1.2E-02 |
| D130040H23Rik | 637   | -1.50 | -0.58 | 2.2E-03 |
| Daxx          | 3662  | 1.33  | 0.41  | 5.3E-04 |
| Dcx           | 58900 | -1.61 | -0.69 | 4.6E-03 |
| Ddit4         | 5097  | 1.36  | 0.45  | 1.3E-02 |
| Ddx27         | 4143  | 1.26  | 0.33  | 2.5E-03 |
| Des           | 251   | -4.09 | -2.03 | 1.1E-02 |
| Dnaaf5        | 1424  | 1.27  | 0.35  | 2.9E-03 |
| Dnah7b        | 877   | -1.61 | -0.68 | 7.5E-03 |
| Dnajc9        | 9295  | 1.35  | 0.43  | 7.1E-03 |
| Dohh          | 255   | 1.26  | 0.33  | 1.7E-02 |
| Dpf1          | 5973  | 1.32  | 0.40  | 2.5E-02 |
| Drc3          | 255   | -1.45 | -0.54 | 1.1E-03 |
| Dusp4         | 7143  | -1.40 | -0.49 | 2.5E-02 |
| Dusp9         | 430   | 1.71  | 0.77  | 1.6E-02 |
| Dxo           | 1656  | 1.27  | 0.34  | 2.5E-03 |
| E2f4          | 3798  | 1.25  | 0.32  | 1.6E-02 |
| Efna4         | 1245  | 1.27  | 0.34  | 2.0E-02 |
| Egf           | 243   | -1.29 | -0.36 | 1.3E-02 |
| Eif2ak2       | 1456  | -1.33 | -0.41 | 2.3E-02 |
| Erf1          | 229   | -1.76 | -0.81 | 7.5E-03 |
| Esrra         | 1994  | 1.31  | 0.39  | 3.2E-03 |
| Evx1          | 102   | -3.25 | -1.70 | 1.3E-02 |
| Fam162a       | 2543  | 1.26  | 0.33  | 6.7E-03 |
| Fam72a        | 340   | 1.42  | 0.51  | 4.9E-03 |
| Fbl           | 7803  | 1.38  | 0.46  | 5.4E-03 |
| Fermt3        | 511   | 1.29  | 0.37  | 1.5E-02 |
| Fgf17         | 317   | -1.64 | -0.71 | 1.2E-02 |
| Fhad1         | 201   | -1.66 | -0.73 | 1.3E-03 |
| Fmn2          | 4236  | 1.28  | 0.35  | 1.4E-02 |
| Fndc1         | 331   | -2.11 | -1.08 | 1.8E-02 |
| Fndc5         | 378   | -2.33 | -1.22 | 2.6E-03 |
| Fosl2         | 765   | -1.54 | -0.62 | 4.3E-03 |
| Frrs1l        | 2272  | -1.50 | -0.58 | 4.7E-03 |
| Gjb2          | 1061  | -2.23 | -1.16 | 1.5E-02 |
| Gldc          | 3791  | 1.64  | 0.71  | 1.6E-03 |
| Gltp          | 1893  | 1.33  | 0.41  | 4.5E-03 |
| Gm20604       | 518   | 1.32  | 0.40  | 9.6E-03 |
| Gon7          | 834   | 1.26  | 0.34  | 1.5E-02 |

|         |        |       |       |         |
|---------|--------|-------|-------|---------|
| Gpr146  | 193    | 1.40  | 0.48  | 1.9E-03 |
| Hapln3  | 143    | 1.33  | 0.42  | 1.2E-02 |
| Hivep2  | 2898   | -1.46 | -0.55 | 1.3E-02 |
| Hmgn5   | 6156   | 1.39  | 0.47  | 1.2E-02 |
| Homer2  | 4016   | -1.33 | -0.41 | 1.0E-03 |
| Hrob    | 900    | 1.46  | 0.54  | 1.8E-02 |
| Htr2c   | 500    | -1.84 | -0.88 | 1.9E-02 |
| Ifih1   | 206    | -1.32 | -0.40 | 1.3E-02 |
| Ifitm3  | 232    | -1.42 | -0.51 | 1.3E-02 |
| Ift74   | 5073   | 1.25  | 0.32  | 2.3E-02 |
| Igsf9   | 10216  | 1.28  | 0.36  | 7.1E-03 |
| Il4ra   | 563    | 1.38  | 0.47  | 1.2E-02 |
| Inpp4b  | 601    | -2.02 | -1.01 | 4.6E-04 |
| Iqub    | 149    | -1.68 | -0.75 | 6.6E-03 |
| Irx4    | 161    | -3.36 | -1.75 | 5.1E-04 |
| Itga4   | 2591   | -1.43 | -0.51 | 1.2E-02 |
| Itgb3bp | 466    | 1.75  | 0.81  | 2.4E-02 |
| Kcnd3   | 3361   | -1.66 | -0.74 | 1.0E-02 |
| Kcnh2   | 2306   | 1.28  | 0.36  | 7.6E-03 |
| Kcnh6   | 115    | -2.06 | -1.05 | 2.4E-02 |
| Kcnmb2  | 329    | -2.11 | -1.07 | 5.5E-04 |
| Kcnq2   | 10691  | -1.57 | -0.65 | 1.6E-02 |
| Kcnu1   | 111    | -1.88 | -0.91 | 3.6E-03 |
| Kctd17  | 5151   | 1.26  | 0.34  | 4.8E-04 |
| Kctd4   | 230    | -2.25 | -1.17 | 1.5E-02 |
| Klf12   | 4189   | -1.61 | -0.69 | 8.8E-03 |
| Klhl41  | 168    | -3.53 | -1.82 | 2.5E-02 |
| L3mbtl2 | 2835   | 1.35  | 0.43  | 4.7E-05 |
| Lbr     | 8479   | 1.34  | 0.42  | 1.9E-02 |
| Lcorl   | 6197   | -1.30 | -0.38 | 1.7E-02 |
| Lepr    | 1001   | -1.62 | -0.70 | 2.5E-02 |
| Letm2   | 1108   | -1.25 | -0.32 | 7.4E-03 |
| Lgals4  | 152    | -1.54 | -0.62 | 5.3E-05 |
| Lpl     | 1617   | -1.29 | -0.37 | 1.6E-02 |
| Lrfn5   | 1079   | -1.89 | -0.92 | 1.3E-02 |
| Lrrc29  | 145    | -1.30 | -0.38 | 1.1E-02 |
| Lrrc46  | 169    | 1.38  | 0.47  | 1.1E-03 |
| Lrrcc1  | 4760   | -1.32 | -0.40 | 1.0E-03 |
| Lrrn3   | 5607   | -1.38 | -0.46 | 1.6E-02 |
| Luzp2   | 1366   | -1.76 | -0.81 | 1.0E-02 |
| Mab21l2 | 3352   | -1.66 | -0.73 | 2.1E-02 |
| Macf1   | 35179  | -1.48 | -0.56 | 2.9E-03 |
| Mafk    | 879    | 1.29  | 0.36  | 6.4E-03 |
| Map1b   | 128461 | -1.38 | -0.46 | 1.6E-02 |
| Mbnl1   | 4042   | -1.34 | -0.42 | 5.6E-03 |
| Mbnl3   | 708    | -1.65 | -0.72 | 1.8E-02 |
| Med18   | 558    | 1.30  | 0.38  | 1.1E-02 |



|          |       |       |       |         |
|----------|-------|-------|-------|---------|
| Med25    | 9144  | 1.31  | 0.39  | 2.8E-03 |
| Med26    | 933   | 1.29  | 0.37  | 3.9E-03 |
| Mif4gd   | 647   | 1.28  | 0.35  | 9.1E-03 |
| Mme      | 3257  | -2.42 | -1.28 | 7.8E-03 |
| Mns1     | 3659  | 1.42  | 0.50  | 7.0E-03 |
| Mtcl1    | 7105  | 1.33  | 0.41  | 1.6E-02 |
| Mutyh    | 826   | 1.30  | 0.38  | 2.1E-02 |
| Mybpc1   | 594   | -3.16 | -1.66 | 7.6E-03 |
| Myh11    | 137   | -1.80 | -0.85 | 1.0E-02 |
| Mylpf    | 550   | -3.52 | -1.81 | 2.4E-02 |
| Myo18b   | 256   | -1.66 | -0.73 | 1.6E-02 |
| Myo5a    | 17678 | -1.36 | -0.44 | 7.3E-03 |
| Naaladl1 | 385   | 1.51  | 0.59  | 9.9E-03 |
| Nalcn    | 1502  | -1.52 | -0.60 | 5.2E-03 |
| Nectin1  | 3445  | 1.50  | 0.59  | 3.8E-03 |
| Nes      | 67412 | 1.42  | 0.51  | 2.0E-02 |
| Nipa1    | 1722  | -1.26 | -0.33 | 1.6E-02 |
| Nmb      | 185   | 1.35  | 0.44  | 1.1E-02 |
| Npm3     | 2109  | 1.29  | 0.36  | 1.0E-02 |
| Nr4a2    | 2860  | 1.35  | 0.43  | 1.7E-02 |
| Nrk      | 2102  | -2.87 | -1.52 | 4.9E-03 |
| Nuak2    | 3379  | 1.60  | 0.68  | 1.3E-03 |
| Nupr1l   | 113   | 1.36  | 0.45  | 1.6E-04 |
| Nxt1     | 1570  | 1.38  | 0.47  | 5.6E-03 |
| Ophn1    | 3837  | -1.28 | -0.35 | 1.2E-02 |
| Pacsin3  | 1373  | 1.27  | 0.34  | 1.8E-02 |
| Pamr1    | 305   | -2.30 | -1.20 | 1.4E-02 |
| Pappa2   | 1655  | -1.51 | -0.59 | 1.5E-02 |
| Parp16   | 499   | 1.26  | 0.33  | 9.7E-03 |
| Pcdha12  | 158   | -1.73 | -0.79 | 3.8E-03 |
| Pcm1     | 18035 | -1.37 | -0.45 | 3.5E-04 |
| Pde1c    | 1638  | -1.46 | -0.54 | 1.2E-02 |
| Pdzrn4   | 1059  | -1.53 | -0.62 | 4.2E-03 |
| Peg10    | 26394 | 1.29  | 0.37  | 1.5E-02 |
| Pelo     | 345   | 1.40  | 0.48  | 1.3E-03 |
| Pgm5     | 1022  | -2.39 | -1.25 | 4.4E-03 |
| Phip     | 21455 | -1.44 | -0.53 | 1.2E-03 |
| Phlda1   | 1204  | -1.43 | -0.52 | 5.3E-03 |
| Pik3r2   | 356   | 1.91  | 0.93  | 1.2E-02 |
| Plekhb1  | 218   | -1.68 | -0.75 | 7.7E-03 |
| Plpp1    | 809   | -1.25 | -0.33 | 1.6E-02 |
| Plpp2    | 470   | 1.38  | 0.47  | 3.8E-03 |
| Polr2f   | 2309  | 1.28  | 0.35  | 1.9E-03 |
| Pou2f1   | 7046  | -1.31 | -0.39 | 3.9E-03 |
| Pou3f1   | 1697  | 1.35  | 0.44  | 1.8E-02 |
| Ppp1r9b  | 13672 | 1.28  | 0.35  | 5.3E-03 |
| Prrt1    | 1648  | 1.51  | 0.60  | 2.3E-02 |

|          |       |       |       |         |
|----------|-------|-------|-------|---------|
| Psm10    | 148   | 1.91  | 0.93  | 2.0E-02 |
| Ptch2    | 878   | 1.27  | 0.35  | 1.2E-02 |
| Ptchd1   | 234   | -1.83 | -0.87 | 1.6E-02 |
| Pycr2    | 2525  | 1.27  | 0.35  | 7.9E-04 |
| Raet1e   | 233   | 1.64  | 0.71  | 1.7E-02 |
| Rap1gap2 | 1651  | -1.35 | -0.43 | 2.5E-02 |
| Rbm41    | 1700  | -1.29 | -0.36 | 4.3E-03 |
| Recql4   | 1338  | 1.39  | 0.48  | 2.0E-02 |
| Rgs16    | 2796  | 1.54  | 0.63  | 4.1E-04 |
| Ribc1    | 173   | 1.46  | 0.54  | 9.3E-03 |
| Rlbp1    | 741   | -1.99 | -0.99 | 1.8E-02 |
| Rnf181   | 217   | 2.32  | 1.21  | 7.0E-03 |
| Rnf208   | 988   | 1.44  | 0.52  | 9.9E-03 |
| Robo3    | 6624  | -1.73 | -0.79 | 5.8E-03 |
| Rorb     | 880   | 1.72  | 0.78  | 3.9E-04 |
| Rusc1    | 2256  | 1.36  | 0.45  | 1.5E-02 |
| Sanbr    | 9330  | -1.28 | -0.36 | 1.8E-02 |
| Scn9a    | 2003  | -2.28 | -1.19 | 2.2E-02 |
| Sdhaf1   | 1026  | 1.36  | 0.44  | 1.5E-04 |
| Sema5a   | 8354  | -1.30 | -0.38 | 1.9E-02 |
| Sgcd     | 199   | -1.98 | -0.98 | 2.4E-02 |
| Sh3d21   | 165   | -1.68 | -0.75 | 2.2E-02 |
| Shmt2    | 5253  | 1.33  | 0.41  | 2.5E-03 |
| Sidt1    | 116   | -2.00 | -1.00 | 2.1E-02 |
| Sipa1    | 2494  | 1.29  | 0.37  | 2.1E-02 |
| Slc35a5  | 2093  | -1.25 | -0.32 | 7.7E-03 |
| Slc35d2  | 139   | -1.67 | -0.74 | 3.9E-03 |
| Slc35g1  | 693   | 1.38  | 0.47  | 1.9E-03 |
| Slc44a5  | 1430  | -1.51 | -0.59 | 1.0E-02 |
| Slitrk6  | 563   | -2.63 | -1.40 | 6.2E-04 |
| Smarca1  | 5682  | -1.30 | -0.38 | 9.4E-04 |
| Smpd13a  | 661   | -1.39 | -0.47 | 9.2E-04 |
| Snpc3    | 4489  | -1.32 | -0.40 | 5.7E-03 |
| Son      | 59465 | -1.32 | -0.41 | 3.8E-03 |
| Sowaha   | 140   | 1.63  | 0.70  | 2.5E-02 |
| Sp5      | 441   | 1.72  | 0.78  | 2.5E-05 |
| Spag9    | 35116 | -1.32 | -0.40 | 1.6E-03 |
| Spire2   | 1474  | 1.30  | 0.37  | 1.4E-02 |
| Srebf1   | 4265  | 1.38  | 0.47  | 5.8E-04 |
| Srsf9    | 4304  | 1.29  | 0.36  | 1.6E-02 |
| Stap2    | 174   | -1.44 | -0.53 | 9.9E-04 |
| Stmn2    | 30680 | -1.38 | -0.46 | 1.4E-02 |
| Sulf1    | 10404 | -1.55 | -0.63 | 8.6E-03 |
| Sumo2    | 11981 | -1.34 | -0.42 | 2.4E-02 |
| Sun2     | 6345  | 1.26  | 0.33  | 9.5E-03 |
| Syne1    | 2080  | -1.70 | -0.76 | 1.4E-02 |
| Tbc1d22b | 3126  | 1.26  | 0.33  | 2.9E-03 |

|           |       |       |       |         |
|-----------|-------|-------|-------|---------|
| Tcp11l1   | 1548  | -1.36 | -0.45 | 1.1E-02 |
| Tecta     | 130   | -1.99 | -1.00 | 5.9E-03 |
| Thbs4     | 431   | -2.11 | -1.08 | 6.5E-03 |
| Thrb      | 169   | -1.57 | -0.65 | 8.4E-04 |
| Thsd7a    | 5730  | -1.62 | -0.69 | 5.0E-03 |
| Tmem106b  | 6052  | -1.25 | -0.32 | 6.4E-03 |
| Tmem200c  | 306   | 1.34  | 0.42  | 2.8E-03 |
| Tmem201   | 5359  | 1.27  | 0.34  | 1.2E-02 |
| Tmem37    | 156   | 1.64  | 0.71  | 1.2E-02 |
| Tmem81    | 220   | 1.28  | 0.36  | 1.7E-03 |
| Tmem86b   | 1293  | 1.31  | 0.39  | 8.0E-03 |
| Tmod4     | 105   | 1.26  | 0.34  | 2.4E-02 |
| Tnfrsf11b | 126   | -1.40 | -0.48 | 6.4E-03 |
| Tnik      | 8481  | -1.46 | -0.55 | 1.3E-02 |
| Tnnc2     | 110   | -6.75 | -2.75 | 8.9E-03 |
| Traip     | 1831  | 1.32  | 0.40  | 1.0E-02 |
| Trim12c   | 629   | -1.34 | -0.43 | 8.2E-03 |
| Trio      | 14535 | -1.30 | -0.38 | 1.8E-02 |
| Ttc3      | 64621 | -1.35 | -0.43 | 5.1E-03 |
| Tubg1     | 3274  | 1.31  | 0.39  | 2.8E-03 |
| Ubr5      | 28114 | -1.28 | -0.36 | 3.3E-03 |
| Upp1      | 107   | 1.46  | 0.55  | 1.1E-02 |
| Usp34     | 19191 | -1.41 | -0.50 | 6.4E-03 |
| Vit       | 1153  | -1.27 | -0.35 | 4.7E-03 |
| Vldlr     | 4509  | -1.35 | -0.43 | 1.6E-02 |
| Vwa5b1    | 186   | -1.71 | -0.77 | 2.3E-02 |
| Vwc2l     | 244   | -2.04 | -1.03 | 1.2E-02 |
| Wars      | 6340  | 1.25  | 0.32  | 3.4E-03 |
| Wnt4      | 470   | -1.70 | -0.76 | 2.3E-02 |
| Xlr3b     | 932   | 2.04  | 1.03  | 4.8E-03 |
| Yjefn3    | 201   | 1.45  | 0.54  | 4.2E-03 |
| Zbtb37    | 5534  | -1.28 | -0.36 | 5.5E-03 |
| Zc3h11a   | 1059  | -1.58 | -0.66 | 2.2E-03 |
| Zc3h3     | 1682  | 1.37  | 0.45  | 5.2E-03 |
| Zdhhc18   | 2443  | 1.26  | 0.33  | 2.3E-02 |
| Zfp109    | 410   | -1.31 | -0.39 | 1.2E-05 |
| Zfp119a   | 583   | -1.53 | -0.61 | 8.2E-04 |
| Zfp280b   | 2585  | 1.28  | 0.35  | 1.9E-03 |
| Zfp367    | 2698  | 1.26  | 0.34  | 2.5E-02 |
| Zfp456    | 134   | -1.40 | -0.49 | 8.1E-03 |
| Zfp598    | 5072  | 1.28  | 0.35  | 1.1E-03 |
| Zfp729a   | 1813  | -1.26 | -0.33 | 1.7E-02 |
| Zfp738    | 3449  | -1.27 | -0.35 | 6.2E-03 |
| Zfp937    | 565   | -1.34 | -0.42 | 2.9E-05 |
| Zfp950    | 3319  | -1.41 | -0.49 | 7.2E-04 |
| Zpld1     | 155   | -2.90 | -1.53 | 7.2E-03 |
