# Supplementary material for: Rapid effects of valproic acid on the fetal brain transcriptome: implications for brain development and autism
Source: PubMed Central journal article supplement — Transl Psychiatry. 2024 Dec 4;14:482. doi: 10.1038/s41398-024-03179-1 (PMC11618798; doi:10.1038/s41398-024-03179-1), 2024-12-04
Supplement: 41398_2024_3179_MOESM4_ESM.pdf [file 41398_2024_3179_MOESM4_ESM.pdf]

Table S3

| Gene            | Counts | Male  |                  | Female |                  |
|-----------------|--------|-------|------------------|--------|------------------|
|                 |        | FC    | p <sub>FDR</sub> | FC     | p <sub>FDR</sub> |
| <i>Abat</i>     | 8490   | 1.58  | 2.4E-08          | 1.68   | 1.7E-10          |
| <i>Abca7</i>    | 4344   | 2.59  | 3.7E-24          | 2.58   | 7.2E-24          |
| <i>Abce1</i>    | 14484  | -1.25 | 2.2E-03          | -1.20  | 1.3E-02          |
| <i>Abi2</i>     | 6428   | -1.33 | 1.3E-03          | -1.25  | 1.4E-02          |
| <i>Ache</i>     | 892    | 1.73  | 1.1E-03          | 1.82   | 3.1E-04          |
| <i>Actb</i>     | 107135 | -1.36 | 2.4E-08          | -1.48  | 4.5E-13          |
| <i>Actn4</i>    | 15736  | 1.43  | 3.2E-05          | 1.37   | 2.6E-04          |
| <i>Acy1</i>     | 1770   | 1.70  | 2.3E-17          | 1.68   | 1.2E-16          |
| <i>Ada</i>      | 284    | 1.30  | 1.9E-02          | 1.35   | 7.7E-03          |
| <i>Adcy3</i>    | 1057   | -1.69 | 1.4E-08          | -1.81  | 1.1E-10          |
| <i>Adk</i>      | 3332   | 1.30  | 1.4E-02          | 1.30   | 1.4E-02          |
| <i>Adnp</i>     | 233    | -1.63 | 4.0E-07          | -1.58  | 3.0E-06          |
| <i>Adora2a</i>  | 296    | -1.25 | 4.9E-02          | -1.36  | 4.9E-03          |
| <i>Ago3</i>     | 5603   | 1.60  | 3.5E-07          | 1.90   | 1.9E-12          |
| <i>Agtr2</i>    | 720    | -6.44 | 2.7E-04          | -4.45  | 4.1E-03          |
| <i>Ahi1</i>     | 10423  | 1.57  | 1.1E-04          | 1.60   | 5.6E-05          |
| <i>Ahnak</i>    | 9132   | -3.07 | 1.2E-07          | -2.64  | 5.6E-06          |
| <i>Akap9</i>    | 18776  | -2.30 | 5.3E-09          | -1.85  | 2.4E-05          |
| <i>Aldoa</i>    | 19582  | 1.32  | 1.1E-03          | 1.25   | 1.2E-02          |
| <i>Ankrd17</i>  | 2867   | -1.72 | 7.9E-13          | -1.66  | 2.6E-11          |
| <i>Anxa1</i>    | 480    | -4.00 | 4.4E-05          | -3.16  | 8.3E-04          |
| <i>Ap1s2</i>    | 5451   | 1.35  | 1.5E-03          | 1.33   | 2.7E-03          |
| <i>Apba2</i>    | 6951   | -1.57 | 2.4E-04          | -1.59  | 1.3E-04          |
| <i>Aph1a</i>    | 4926   | 1.43  | 2.2E-08          | 1.31   | 2.6E-05          |
| <i>Arf3</i>     | 12109  | 1.27  | 5.6E-06          | 1.20   | 9.6E-04          |
| <i>Arhgef2</i>  | 9820   | -1.95 | 1.2E-15          | -2.08  | 9.6E-19          |
| <i>Arid1b</i>   | 5659   | -2.13 | 1.2E-16          | -2.17  | 2.7E-17          |
| <i>Arid2</i>    | 11217  | -1.62 | 2.8E-15          | -1.59  | 4.7E-14          |
| <i>Arntl2</i>   | 511    | 1.71  | 3.1E-06          | 2.17   | 1.2E-11          |
| <i>Ash1l</i>    | 9264   | -1.69 | 1.4E-05          | -1.40  | 6.9E-03          |
| <i>Asxl3</i>    | 5208   | -1.75 | 1.5E-10          | -1.57  | 2.7E-07          |
| <i>Atp10a</i>   | 473    | -1.89 | 3.3E-16          | -1.89  | 4.2E-16          |
| <i>Atp6v0a2</i> | 6136   | 1.42  | 2.4E-14          | 1.40   | 2.6E-13          |
| <i>Atrx</i>     | 29927  | -1.80 | 2.5E-06          | -1.44  | 5.0E-03          |
| <i>Bace1</i>    | 6271   | 1.83  | 4.3E-22          | 1.90   | 2.0E-24          |
| <i>Baiap2l1</i> | 386    | 3.78  | 2.5E-09          | 3.63   | 8.1E-09          |
| <i>Bcas1</i>    | 279    | -1.78 | 1.5E-03          | -1.52  | 2.4E-02          |
| <i>Bcl11a</i>   | 10078  | -1.59 | 6.6E-05          | -1.70  | 5.2E-06          |
| <i>Bcorl1</i>   | 4918   | 1.89  | 1.9E-10          | 1.80   | 5.5E-09          |
| <i>Brinp2</i>   | 2925   | 2.82  | 2.7E-12          | 2.61   | 1.2E-10          |
| <i>Brsk2</i>    | 7140   | -1.74 | 2.6E-04          | -1.86  | 4.1E-05          |
| <i>Brwd3</i>    | 6365   | 1.42  | 2.2E-03          | 1.66   | 4.9E-06          |
| <i>Btaf1</i>    | 10163  | 1.41  | 1.9E-02          | 1.62   | 6.9E-04          |
| <i>Cacna1b</i>  | 6214   | 1.34  | 4.7E-02          | 1.42   | 1.7E-02          |
| <i>Cacna1c</i>  | 3446   | -1.47 | 3.1E-03          | -1.38  | 1.5E-02          |
| <i>Cacna2d1</i> | 9393   | -1.84 | 2.7E-08          | -1.59  | 3.0E-05          |
| <i>Cacnb2</i>   | 498    | -2.08 | 9.5E-13          | -1.80  | 1.2E-08          |
| <i>Cadm1</i>    | 12690  | 1.25  | 1.3E-02          | 1.28   | 5.3E-03          |
| <i>Camk2a</i>   | 4142   | 1.94  | 1.6E-07          | 1.84   | 1.4E-06          |
| <i>Caprin1</i>  | 3184   | 1.25  | 1.4E-03          | 1.31   | 1.0E-04          |
| <i>Cask</i>     | 10174  | -1.30 | 4.7E-03          | -1.24  | 2.3E-02          |
| <i>Casz1</i>    | 1306   | 2.43  | 2.5E-08          | 3.00   | 3.2E-12          |

| Gene            | Counts | Male  |                  | Female |                  |
|-----------------|--------|-------|------------------|--------|------------------|
|                 |        | FC    | p <sub>FDR</sub> | FC     | p <sub>FDR</sub> |
| <i>Cc2d1a</i>   | 2014   | -1.38 | 3.6E-03          | -1.44  | 1.1E-03          |
| <i>Ccdc91</i>   | 1888   | -1.95 | 2.9E-49          | -1.82  | 4.0E-40          |
| <i>Ccng1</i>    | 5463   | 1.49  | 2.9E-08          | 1.58   | 1.4E-10          |
| <i>Cd276</i>    | 3140   | -2.13 | 5.0E-36          | -2.18  | 2.4E-38          |
| <i>Cd38</i>     | 232    | -1.84 | 8.7E-05          | -1.90  | 3.5E-05          |
| <i>Cdc42bpb</i> | 14607  | 1.34  | 2.8E-04          | 1.31   | 9.7E-04          |
| <i>Cdh11</i>    | 12820  | -2.40 | 2.1E-06          | -2.37  | 3.3E-06          |
| <i>Cdk19</i>    | 6534   | 1.17  | 1.4E-02          | 1.25   | 3.0E-04          |
| <i>Cdk5rap2</i> | 8016   | -1.37 | 6.2E-04          | -1.27  | 1.2E-02          |
| <i>Cdkl5</i>    | 3056   | 1.71  | 5.9E-08          | 1.95   | 9.5E-12          |
| <i>Cdon</i>     | 13736  | -1.37 | 4.4E-04          | -1.20  | 4.7E-02          |
| <i>Celf6</i>    | 1504   | 1.51  | 1.1E-03          | 1.44   | 4.8E-03          |
| <i>Cep135</i>   | 2358   | -1.51 | 7.3E-09          | -1.38  | 9.7E-06          |
| <i>Cep41</i>    | 1580   | -1.91 | 2.3E-44          | -1.94  | 1.8E-46          |
| <i>Chd2</i>     | 12282  | 1.21  | 2.5E-02          | 1.35   | 3.5E-04          |
| <i>Chd3</i>     | 39510  | -1.98 | 9.7E-21          | -2.00  | 3.8E-21          |
| <i>Chd7</i>     | 13012  | -1.35 | 1.4E-02          | -1.33  | 2.0E-02          |
| <i>Chrna7</i>   | 407.96 | 1.42  | 1.9E-04          | 1.28   | 9.1E-03          |
| <i>Clcn4</i>    | 10609  | -1.57 | 1.3E-06          | -1.48  | 3.5E-05          |
| <i>Cln8</i>     | 2506   | 1.77  | 2.3E-31          | 1.68   | 4.8E-26          |
| <i>Cmpk2</i>    | 785    | 1.26  | 2.5E-02          | 1.26   | 2.4E-02          |
| <i>Cnr1</i>     | 6596   | -2.09 | 6.8E-05          | -1.84  | 1.2E-03          |
| <i>Cntnap2</i>  | 11429  | 1.42  | 7.8E-04          | 1.26   | 3.6E-02          |
| <i>Cpeb4</i>    | 8073   | 1.60  | 9.9E-05          | 1.56   | 2.5E-04          |
| <i>Cpsf7</i>    | 11294  | -1.50 | 5.6E-09          | -1.61  | 5.6E-12          |
| <i>Cpt2</i>     | 1271   | 1.38  | 4.1E-04          | 1.29   | 5.1E-03          |
| <i>Crebbp</i>   | 5496   | -1.93 | 1.7E-10          | -2.06  | 2.0E-12          |
| <i>Csde1</i>    | 31901  | -1.98 | 6.1E-40          | -2.01  | 3.0E-41          |
| <i>Csnk1e</i>   | 14294  | -1.44 | 1.2E-06          | -1.54  | 6.5E-09          |
| <i>Csnk2a1</i>  | 16382  | -1.27 | 5.8E-08          | -1.26  | 8.2E-08          |
| <i>Csnk2b</i>   | 5717   | 1.39  | 1.0E-11          | 1.32   | 1.4E-08          |
| <i>Ctcf</i>     | 9148   | -2.34 | 1.8E-38          | -2.56  | 6.6E-47          |
| <i>Ctr9</i>     | 13165  | 1.54  | 1.2E-27          | 1.54   | 1.4E-27          |
| <i>Cul7</i>     | 10139  | -1.69 | 4.5E-14          | -1.80  | 1.2E-17          |
| <i>Cx3cr1</i>   | 687    | -2.05 | 1.2E-17          | -2.28  | 1.3E-22          |
| <i>Cyfp1</i>    | 6506   | -1.45 | 1.4E-06          | -1.45  | 1.6E-06          |
| <i>Ddc</i>      | 823    | -1.30 | 1.8E-02          | -1.35  | 6.1E-03          |
| <i>Ddx3x</i>    | 52188  | -1.58 | 5.5E-09          | -1.63  | 4.1E-10          |
| <i>Deaf1</i>    | 3240   | -1.47 | 4.7E-07          | -1.57  | 2.5E-09          |
| <i>Depdc5</i>   | 6414   | 1.60  | 1.5E-25          | 1.66   | 5.1E-29          |
| <i>Dhcr7</i>    | 4286   | 1.56  | 6.0E-08          | 1.38   | 1.2E-04          |
| <i>Dhx30</i>    | 9045   | -1.55 | 3.6E-20          | -1.65  | 7.1E-26          |
| <i>Dip2c</i>    | 3203   | -2.00 | 2.1E-11          | -1.94  | 1.9E-10          |
| <i>Disc1</i>    | 150    | -2.17 | 8.3E-13          | -1.71  | 1.1E-06          |
| <i>Dixdc1</i>   | 6724   | 1.41  | 1.4E-06          | 1.50   | 1.0E-08          |
| <i>Dmpk</i>     | 2879   | 1.32  | 4.3E-03          | 1.26   | 2.2E-02          |
| <i>Dnah10</i>   | 231    | 2.35  | 4.2E-06          | 2.49   | 8.6E-07          |
| <i>Dnah17</i>   | 157    | 5.09  | 4.6E-23          | 5.86   | 7.3E-27          |
| <i>Dnmt3a</i>   | 15809  | -2.22 | 4.4E-38          | -2.11  | 3.4E-33          |
| <i>Dock1</i>    | 4066   | -1.49 | 7.5E-04          | -1.38  | 7.5E-03          |
| <i>Dock8</i>    | 232    | -2.26 | 2.3E-04          | -2.08  | 1.0E-03          |
| <i>Dolk</i>     | 1049   | 1.29  | 1.9E-04          | 1.22   | 5.4E-03          |

Table S3 (cont)

| Gene           | Counts | Male  |                  | Female |                  |
|----------------|--------|-------|------------------|--------|------------------|
|                |        | FC    | p <sub>FDR</sub> | FC     | p <sub>FDR</sub> |
| <i>Dpp4</i>    | 163    | -1.87 | 5.5E-03          | -1.69  | 2.3E-02          |
| <i>Dpysl2</i>  | 11973  | -1.40 | 2.7E-02          | -1.70  | 2.8E-04          |
| <i>Dpysl3</i>  | 81721  | -1.46 | 4.0E-03          | -1.42  | 8.2E-03          |
| <i>Drd2</i>    | 191    | 1.98  | 7.8E-06          | 1.92   | 2.1E-05          |
| <i>Dusp15</i>  | 477    | 2.05  | 1.4E-05          | 2.24   | 9.4E-07          |
| <i>Dyrk1a</i>  | 7472   | -1.44 | 2.6E-08          | -1.54  | 2.1E-11          |
| <i>Ebf3</i>    | 12814  | -1.68 | 2.6E-04          | -1.60  | 1.1E-03          |
| <i>Ecpas</i>   | 9645   | -1.62 | 2.0E-10          | -1.50  | 1.6E-07          |
| <i>Efr3a</i>   | 5605   | 1.74  | 1.0E-15          | 1.91   | 5.7E-21          |
| <i>Ehmt1</i>   | 11001  | -1.32 | 3.2E-07          | -1.44  | 5.5E-12          |
| <i>Ep300</i>   | 10587  | -1.39 | 1.2E-05          | -1.31  | 4.0E-04          |
| <i>Epc2</i>    | 5022   | -3.53 | 7.0E-57          | -3.45  | 8.2E-55          |
| <i>Ephb2</i>   | 25546  | 1.44  | 1.4E-03          | 1.29   | 2.8E-02          |
| <i>Erbin</i>   | 14418  | -2.02 | 2.6E-26          | -1.88  | 3.6E-21          |
| <i>Erg</i>     | 1097   | -2.37 | 4.0E-09          | -2.44  | 1.2E-09          |
| <i>Exoc3</i>   | 8530   | -1.26 | 7.8E-06          | -1.23  | 4.7E-05          |
| <i>Exoc6</i>   | 1031   | -1.67 | 5.4E-12          | -1.60  | 2.1E-10          |
| <i>Ext1</i>    | 5543   | 1.28  | 3.9E-04          | 1.29   | 2.6E-04          |
| <i>Fabp5</i>   | 12171  | -1.45 | 1.2E-07          | -1.46  | 7.7E-08          |
| <i>Fam98c</i>  | 976    | 2.59  | 4.5E-43          | 2.47   | 5.2E-39          |
| <i>Fbxo11</i>  | 13248  | -1.37 | 3.5E-04          | -1.41  | 1.1E-04          |
| <i>Fbxo33</i>  | 1584   | 1.59  | 1.5E-17          | 1.51   | 6.6E-14          |
| <i>Fezf2</i>   | 1417   | -1.73 | 5.8E-03          | -1.99  | 4.1E-04          |
| <i>Foxp2</i>   | 6899   | -1.49 | 2.2E-08          | -1.58  | 1.6E-10          |
| <i>Frk</i>     | 338    | -3.44 | 2.6E-06          | -3.42  | 3.2E-06          |
| <i>Fxn</i>     | 615    | -1.96 | 1.2E-17          | -2.04  | 1.4E-19          |
| <i>Gabbr2</i>  | 570    | -2.47 | 7.9E-03          | -2.25  | 1.9E-02          |
| <i>Gabra4</i>  | 739    | 2.46  | 3.0E-08          | 2.63   | 2.6E-09          |
| <i>Galnt10</i> | 4324   | 1.96  | 2.5E-16          | 1.91   | 4.3E-15          |
| <i>Galnt14</i> | 565    | -2.75 | 7.3E-21          | -2.53  | 1.2E-17          |
| <i>Gas2</i>    | 1719   | -1.55 | 2.7E-04          | -1.45  | 2.1E-03          |
| <i>Gbe1</i>    | 851    | -1.62 | 4.7E-07          | -1.67  | 7.3E-08          |
| <i>Gnai1</i>   | 4191   | 1.42  | 4.4E-03          | 1.43   | 3.8E-03          |
| <i>Gnb1l</i>   | 483    | 1.57  | 2.1E-15          | 1.60   | 1.3E-16          |
| <i>Grb10</i>   | 45862  | -1.51 | 5.4E-03          | -1.49  | 6.7E-03          |
| <i>Grid2ip</i> | 169    | 2.70  | 6.3E-24          | 3.40   | 1.4E-34          |
| <i>Grik4</i>   | 520    | -1.44 | 1.2E-03          | -1.38  | 4.7E-03          |
| <i>Grik5</i>   | 7313   | -1.31 | 2.2E-02          | -1.40  | 3.6E-03          |
| <i>Grin2a</i>  | 270    | -2.28 | 1.5E-08          | -2.27  | 2.0E-08          |
| <i>Gtf2i</i>   | 23958  | -2.36 | 1.2E-34          | -2.54  | 8.0E-41          |
| <i>Hcfc1</i>   | 17725  | -2.30 | 2.7E-29          | -2.29  | 4.5E-29          |
| <i>Hdlbp</i>   | 25696  | -1.29 | 9.1E-03          | -1.25  | 2.5E-02          |
| <i>Hecw2</i>   | 1165   | -2.41 | 4.0E-22          | -2.08  | 1.7E-15          |
| <i>Hivep2*</i> | 2898   | -1.46 | 1.3E-02          | -1.32  | 8.0E-02          |
| <i>Hnrnpk</i>  | 69304  | -1.30 | 9.0E-05          | -1.36  | 3.4E-06          |
| <i>Hnrnpu</i>  | 3018   | -1.59 | 3.3E-04          | -1.59  | 3.4E-04          |
| <i>Homer1</i>  | 5300   | 1.61  | 9.6E-20          | 1.63   | 7.6E-21          |
| <i>Ica1</i>    | 848    | -1.41 | 2.3E-04          | -1.30  | 5.0E-03          |
| <i>Igf1</i>    | 2781   | -3.30 | 8.9E-04          | -3.18  | 1.3E-03          |
| <i>Ikzf1</i>   | 271    | -1.58 | 1.5E-05          | -1.59  | 1.2E-05          |
| <i>Inpp1</i>   | 1129   | -2.01 | 6.8E-32          | -2.01  | 8.4E-32          |
| <i>Ints6</i>   | 3398   | -1.53 | 3.8E-20          | -1.47  | 2.7E-16          |

| Gene            | Counts | Male  |                  | Female |                  |
|-----------------|--------|-------|------------------|--------|------------------|
|                 |        | FC    | p <sub>FDR</sub> | FC     | p <sub>FDR</sub> |
| <i>Iqgap3</i>   | 4143   | 1.40  | 1.9E-03          | 1.39   | 2.5E-03          |
| <i>Iqsec2</i>   | 1627   | 1.47  | 8.2E-05          | 1.40   | 7.0E-04          |
| <i>Irf2bpl</i>  | 5211   | -1.30 | 2.7E-02          | -1.52  | 3.4E-04          |
| <i>Itpr1</i>    | 4428   | 1.77  | 6.2E-07          | 2.01   | 6.7E-10          |
| <i>Kansl1</i>   | 8932   | -1.43 | 1.0E-14          | -1.47  | 3.6E-17          |
| <i>Kansl1l</i>  | 2089   | -1.80 | 1.7E-19          | -1.61  | 4.1E-13          |
| <i>Kat2b</i>    | 1923   | -1.71 | 1.0E-09          | -1.73  | 4.2E-10          |
| <i>Kat6b</i>    | 7883   | -2.68 | 1.9E-23          | -2.43  | 3.8E-19          |
| <i>Katnal1</i>  | 2730   | -1.97 | 2.7E-24          | -2.04  | 9.5E-27          |
| <i>Kcnb1</i>    | 1903   | 1.44  | 4.3E-03          | 1.49   | 1.6E-03          |
| <i>Kcnc3</i>    | 5043   | 5.14  | 3.4E-42          | 4.74   | 3.4E-38          |
| <i>Kcnj10</i>   | 1277   | 2.72  | 9.7E-28          | 2.66   | 1.8E-26          |
| <i>Kcnq2*</i>   | 10691  | -1.57 | 1.6E-02          | -1.42  | 6.4E-02          |
| <i>Kdm1b</i>    | 5673   | 2.26  | 3.4E-130         | 2.28   | 4.1E-133         |
| <i>Kdm5c</i>    | 12138  | -1.40 | 1.1E-14          | -1.53  | 3.7E-23          |
| <i>Kdm6b</i>    | 8176   | -1.30 | 4.8E-02          | -1.51  | 1.4E-03          |
| <i>Kif13b</i>   | 3411   | 1.29  | 4.0E-03          | 1.48   | 4.3E-06          |
| <i>Kif14</i>    | 2071   | -1.46 | 4.8E-04          | -1.48  | 2.9E-04          |
| <i>Kif16</i>    | 1425   | 2.00  | 1.5E-16          | 1.78   | 8.3E-12          |
| <i>Klf7</i>     | 6968   | -1.26 | 2.5E-02          | -1.27  | 2.3E-02          |
| <i>Kmt2e</i>    | 18204  | -1.33 | 3.4E-04          | -1.36  | 8.9E-05          |
| <i>Kmt5b</i>    | 6543   | -6.45 | 2.2E-62          | -6.59  | 9.4E-64          |
| <i>Kptn</i>     | 941    | -2.00 | 4.4E-45          | -2.16  | 2.4E-55          |
| <i>Lamb1</i>    | 8515   | -1.45 | 4.2E-03          | -1.39  | 1.3E-02          |
| <i>Las1l</i>    | 6968   | 1.40  | 4.1E-24          | 1.37   | 1.2E-21          |
| <i>Ldb1</i>     | 15935  | -1.30 | 6.7E-05          | -1.40  | 3.0E-07          |
| <i>Ldlr</i>     | 2768   | -1.36 | 3.2E-02          | -1.57  | 1.1E-03          |
| <i>Lin7b</i>    | 298    | 6.34  | 4.5E-69          | 6.45   | 1.5E-69          |
| <i>Lnpk</i>     | 5745   | 1.28  | 3.6E-03          | 1.46   | 3.3E-06          |
| <i>Lrfn2</i>    | 233    | -1.63 | 3.9E-02          | -1.67  | 3.1E-02          |
| <i>Lrp2</i>     | 2856   | 1.43  | 3.2E-02          | 1.64   | 2.8E-03          |
| <i>Lrrc1</i>    | 2446   | 1.64  | 7.0E-12          | 1.59   | 9.9E-11          |
| <i>Lrrc4</i>    | 888    | -3.27 | 1.1E-12          | -3.64  | 8.2E-15          |
| <i>Lztr1</i>    | 7298   | -1.32 | 3.1E-15          | -1.33  | 6.8E-16          |
| <i>Lzts2</i>    | 3586   | -1.20 | 3.2E-02          | -1.33  | 5.7E-04          |
| <i>Maoa</i>     | 3840   | 1.36  | 9.8E-05          | 1.39   | 2.0E-05          |
| <i>Map1a</i>    | 10875  | 1.62  | 2.0E-04          | 1.61   | 2.3E-04          |
| <i>Map4k1</i>   | 311    | -1.27 | 6.1E-03          | -1.37  | 3.2E-04          |
| <i>Mapk8ip1</i> | 12031  | 1.45  | 1.9E-07          | 1.37   | 1.0E-05          |
| <i>Mark1</i>    | 5757   | -1.39 | 3.0E-03          | -1.42  | 1.7E-03          |
| <i>Mast3</i>    | 433    | 2.89  | 1.1E-05          | 2.18   | 1.5E-03          |
| <i>Mbd3</i>     | 6414   | -2.01 | 1.9E-13          | -2.27  | 3.7E-18          |
| <i>Mbd4</i>     | 2576   | 1.30  | 1.3E-05          | 1.33   | 1.8E-06          |
| <i>Mboat7</i>   | 5265   | 1.93  | 3.0E-26          | 1.91   | 2.5E-25          |
| <i>Mecp2</i>    | 11258  | -1.59 | 2.3E-05          | -1.54  | 7.6E-05          |
| <i>Megf10</i>   | 3621   | -1.96 | 6.1E-22          | -1.80  | 9.4E-17          |
| <i>Meis2</i>    | 15231  | -1.49 | 9.6E-04          | -1.39  | 7.0E-03          |
| <i>Mink1</i>    | 6672   | 1.33  | 6.4E-04          | 1.25   | 9.3E-03          |
| <i>Mrtfb</i>    | 3074   | -1.45 | 6.7E-10          | -1.39  | 5.4E-08          |
| <i>Mtf1</i>     | 1803   | -1.16 | 2.5E-02          | -1.25  | 5.6E-04          |
| <i>Mtor</i>     | 10534  | 1.48  | 7.4E-11          | 1.56   | 1.1E-13          |
| <i>Myh9</i>     | 16822  | 1.30  | 3.5E-02          | 1.29   | 4.4E-02          |

Table S3 (cont)

| Gene            | Counts | Male  |                  | Female |                  |
|-----------------|--------|-------|------------------|--------|------------------|
|                 |        | FC    | p <sub>FDR</sub> | FC     | p <sub>FDR</sub> |
| <i>Mylk</i>     | 1785   | -1.20 | 4.4E-02          | -1.25  | 1.5E-02          |
| <i>Myo1e</i>    | 3165   | 3.35  | 1.4E-64          | 3.28   | 2.9E-62          |
| <i>Myo5a*</i>   | 17678  | -1.36 | 7.3E-03          | -1.22  | 9.8E-02          |
| <i>Myo9b</i>    | 12403  | 1.43  | 3.5E-08          | 1.52   | 5.1E-11          |
| <i>Nacc1</i>    | 8224   | -1.15 | 1.4E-01          | -1.29  | 3.2E-03          |
| <i>Nexmif</i>   | 3129   | -2.12 | 1.7E-03          | -1.76  | 2.3E-02          |
| <i>Nf1</i>      | 8492   | -1.34 | 1.2E-04          | -1.27  | 1.9E-03          |
| <i>Nfe2l3</i>   | 803    | 4.19  | 8.5E-61          | 3.97   | 1.5E-56          |
| <i>Nfia</i>     | 6750   | -1.71 | 1.4E-03          | -1.83  | 3.0E-04          |
| <i>Nfib</i>     | 18590  | -2.04 | 5.5E-04          | -2.04  | 5.8E-04          |
| <i>Nfix</i>     | 5859   | -2.03 | 4.0E-03          | -2.11  | 2.3E-03          |
| <i>Nipa2</i>    | 4612   | 1.32  | 9.0E-08          | 1.36   | 3.8E-09          |
| <i>Nkx2-2†</i>  | 355    | -1.14 | 6.4E-01          | -1.77  | 1.6E-02          |
| <i>Nr1d1</i>    | 234    | 2.42  | 2.9E-08          | 2.09   | 4.4E-06          |
| <i>Nr2f1</i>    | 15518  | -1.63 | 9.4E-06          | -1.93  | 1.2E-09          |
| <i>Nr3c2</i>    | 254    | 2.04  | 7.0E-04          | 2.10   | 4.3E-04          |
| <i>Nr4a2*</i>   | 2860   | 1.35  | 1.7E-02          | 1.26   | 7.4E-02          |
| <i>Nsd1</i>     | 20486  | -1.74 | 2.9E-11          | -1.58  | 4.4E-08          |
| <i>Nsd2</i>     | 33101  | -1.33 | 1.0E-04          | -1.28  | 9.4E-04          |
| <i>Nsmce3</i>   | 1585   | 1.44  | 1.8E-18          | 1.36   | 2.3E-13          |
| <i>Nxf1</i>     | 17752  | 1.27  | 4.8E-08          | 1.26   | 1.6E-07          |
| <i>Nxph1</i>    | 911    | -2.60 | 8.0E-07          | -2.48  | 3.3E-06          |
| <i>Ofd1</i>     | 2004   | -1.35 | 8.8E-09          | -1.34  | 2.4E-08          |
| <i>Ophn1*</i>   | 3837   | -1.28 | 1.2E-02          | -1.18  | 1.1E-01          |
| <i>Patj</i>     | 1326   | -2.29 | 1.3E-31          | -2.20  | 1.1E-28          |
| <i>Pcca</i>     | 2377   | 1.50  | 4.9E-07          | 1.51   | 4.8E-07          |
| <i>Pccb</i>     | 2484   | -1.67 | 1.1E-47          | -1.81  | 4.0E-63          |
| <i>Pcdh10</i>   | 8761   | 1.47  | 4.4E-03          | 1.54   | 1.4E-03          |
| <i>Pcdha11</i>  | 113    | -2.30 | 2.5E-04          | -1.94  | 4.1E-03          |
| <i>Pcdha3</i>   | 113    | -2.00 | 1.2E-03          | -1.97  | 1.7E-03          |
| <i>Pcdha7</i>   | 112    | -1.90 | 1.3E-02          | -2.01  | 6.8E-03          |
| <i>Pdk2</i>     | 1859   | 2.00  | 1.8E-19          | 2.02   | 3.9E-20          |
| <i>Pdzd8</i>    | 8176   | 1.44  | 5.7E-22          | 1.50   | 1.2E-26          |
| <i>Per1</i>     | 3226   | 1.95  | 1.1E-11          | 1.77   | 8.2E-09          |
| <i>Per2</i>     | 1092   | 1.71  | 1.0E-05          | 1.68   | 2.2E-05          |
| <i>Pex7</i>     | 836    | -2.40 | 3.4E-59          | -2.40  | 1.2E-58          |
| <i>Phb</i>      | 6881   | 1.29  | 2.3E-05          | 1.27   | 1.1E-04          |
| <i>Phf2</i>     | 6735   | -1.85 | 5.0E-08          | -2.00  | 5.6E-10          |
| <i>Phf14</i>    | 11218  | -1.74 | 2.7E-18          | -1.77  | 2.0E-19          |
| <i>Phip*</i>    | 21455  | -1.44 | 1.2E-03          | -1.22  | 9.0E-02          |
| <i>Pik3cg</i>   | 194    | -2.20 | 4.0E-09          | -2.41  | 6.5E-11          |
| <i>Pitx1</i>    | 157    | -3.67 | 5.1E-03          | -5.34  | 2.6E-04          |
| <i>Plxnb1</i>   | 17385  | -1.79 | 1.2E-08          | -1.91  | 2.6E-10          |
| <i>Pnpla7</i>   | 498    | -1.27 | 2.0E-03          | -1.28  | 1.4E-03          |
| <i>Pogz</i>     | 8242   | -2.18 | 2.3E-29          | -2.25  | 8.9E-32          |
| <i>Polr2a</i>   | 20372  | -1.35 | 4.3E-04          | -1.38  | 1.2E-04          |
| <i>Pola2</i>    | 4393   | 1.67  | 7.1E-08          | 1.57   | 3.1E-06          |
| <i>Pomgnt1</i>  | 3228   | -1.63 | 1.2E-31          | -1.69  | 7.8E-37          |
| <i>Pomt1</i>    | 2351   | -1.30 | 2.8E-07          | -1.29  | 7.1E-07          |
| <i>Ppm1d</i>    | 2918   | 1.33  | 2.6E-08          | 1.23   | 7.7E-05          |
| <i>Ppp1r1b</i>  | 299    | 3.35  | 1.3E-04          | 4.05   | 8.5E-06          |
| <i>Ppp1r9b*</i> | 13672  | 1.28  | 5.3E-03          | 1.17   | 9.4E-02          |

| Gene             | Counts | Male  |                  | Female |                  |
|------------------|--------|-------|------------------|--------|------------------|
|                  |        | FC    | p <sub>FDR</sub> | FC     | p <sub>FDR</sub> |
| <i>Ppp2r1b</i>   | 7788   | 1.54  | 2.2E-11          | 1.44   | 2.0E-08          |
| <i>Ppp2r5d</i>   | 10594  | 1.79  | 5.1E-25          | 1.68   | 2.5E-20          |
| <i>Prex1</i>     | 6987   | 1.55  | 5.5E-08          | 1.62   | 2.4E-09          |
| <i>Prkd1</i>     | 1487   | 1.33  | 9.2E-03          | 1.33   | 8.9E-03          |
| <i>Prr12*</i>    | 7437   | -1.31 | 6.4E-02          | -1.48  | 4.9E-03          |
| <i>Ptbp2</i>     | 26867  | -1.53 | 5.5E-08          | -1.56  | 1.3E-08          |
| <i>Ptchd1*</i>   | 234    | -1.83 | 1.6E-02          | -1.65  | 5.1E-02          |
| <i>Ptdss1</i>    | 5032   | 1.32  | 6.1E-07          | 1.38   | 8.6E-09          |
| <i>Ptpn4</i>     | 9452   | 1.32  | 1.6E-02          | 1.60   | 3.4E-05          |
| <i>Prkd2</i>     | 1619   | 1.69  | 3.1E-11          | 1.65   | 3.4E-10          |
| <i>Pten</i>      | 12976  | 1.37  | 3.9E-06          | 1.37   | 3.9E-06          |
| <i>Ptk7</i>      | 9855   | 1.29  | 1.8E-02          | 1.27   | 2.5E-02          |
| <i>Ptpn11</i>    | 16665  | 1.31  | 9.8E-16          | 1.27   | 8.7E-13          |
| <i>Ptprb</i>     | 1124   | -1.77 | 2.0E-08          | -1.83  | 2.6E-09          |
| <i>Pxdn</i>      | 15773  | -1.48 | 4.5E-05          | -1.38  | 1.1E-03          |
| <i>Rab11fip5</i> | 3422   | 2.08  | 6.9E-20          | 2.09   | 3.7E-20          |
| <i>Rad21</i>     | 24544  | -1.30 | 9.2E-06          | -1.37  | 7.5E-08          |
| <i>Rai1</i>      | 7722   | -1.57 | 2.5E-07          | -1.56  | 3.3E-07          |
| <i>Ranbp17</i>   | 928    | -1.59 | 3.6E-07          | -1.48  | 1.9E-05          |
| <i>Rassf5</i>    | 168    | 1.54  | 2.2E-02          | 1.66   | 6.4E-03          |
| <i>Reep3</i>     | 6903   | -1.26 | 5.0E-10          | -1.26  | 5.5E-10          |
| <i>Rfx3</i>      | 5786   | -1.47 | 5.0E-08          | -1.45  | 2.2E-07          |
| <i>Rfx4</i>      | 2512   | -1.73 | 7.1E-04          | -1.78  | 3.4E-04          |
| <i>Rims2</i>     | 3497   | -1.38 | 1.1E-02          | -1.48  | 1.7E-03          |
| <i>Rims3</i>     | 4156   | 1.95  | 2.0E-08          | 1.98   | 1.2E-08          |
| <i>Rnf135</i>    | 168    | -1.99 | 4.9E-08          | -1.97  | 8.1E-08          |
| <i>Rorb*</i>     | 880    | 1.72  | 3.9E-04          | 1.32   | 8.8E-02          |
| <i>Rps6ka2</i>   | 5307   | 1.80  | 8.1E-20          | 1.80   | 8.6E-20          |
| <i>Rps6ka3</i>   | 11427  | 1.21  | 3.3E-03          | 1.29   | 3.3E-05          |
| <i>Runx11</i>    | 7184   | -1.62 | 4.1E-03          | -1.61  | 4.8E-03          |
| <i>Samd11</i>    | 170    | -1.90 | 1.4E-04          | -2.03  | 2.3E-05          |
| <i>Sbf1</i>      | 12325  | 1.57  | 4.1E-08          | 1.53   | 2.8E-07          |
| <i>Scaf4</i>     | 5878   | 1.30  | 4.1E-04          | 1.26   | 1.8E-03          |
| <i>Scn9a*†</i>   | 2003   | -2.28 | 2.2E-02          | -1.29  | 5.3E-01          |
| <i>Sdc2</i>      | 2896   | -1.53 | 2.6E-02          | -1.49  | 3.8E-02          |
| <i>Sema5a*</i>   | 8354   | -1.30 | 1.9E-02          | -1.16  | 2.1E-01          |
| <i>Set</i>       | 42386  | -1.41 | 4.4E-04          | -1.59  | 1.3E-06          |
| <i>Setbp1</i>    | 9254   | -3.28 | 1.7E-29          | -3.22  | 1.2E-28          |
| <i>Setd1b</i>    | 4177   | -2.04 | 1.6E-07          | -2.28  | 1.1E-09          |
| <i>Setdb2</i>    | 1135   | 1.56  | 1.1E-07          | 1.63   | 5.2E-09          |
| <i>Sgsm3</i>     | 2524   | 1.76  | 8.5E-29          | 1.69   | 8.3E-25          |
| <i>Shank2</i>    | 2071   | -2.21 | 1.8E-05          | -2.32  | 4.8E-06          |
| <i>Sik1</i>      | 2688   | 1.25  | 1.0E-02          | 1.26   | 8.0E-03          |
| <i>Sin3a</i>     | 12950  | 1.69  | 3.1E-27          | 1.62   | 8.5E-23          |
| <i>Slc22a15</i>  | 1103   | -2.14 | 3.7E-39          | -1.90  | 6.7E-28          |
| <i>Slc25a12</i>  | 5108   | 1.38  | 2.3E-10          | 1.35   | 6.1E-09          |
| <i>Slc25a39</i>  | 4509   | 1.70  | 1.8E-14          | 1.57   | 9.8E-11          |
| <i>Slc29a4</i>   | 3649   | 1.55  | 1.5E-05          | 1.54   | 2.4E-05          |
| <i>Slc38a10</i>  | 11004  | 1.62  | 9.3E-17          | 1.52   | 6.0E-13          |
| <i>Slc6a8</i>    | 5359   | 1.72  | 5.6E-29          | 1.62   | 4.3E-23          |
| <i>Slc7a3</i>    | 316    | 2.75  | 5.8E-38          | 2.79   | 4.9E-39          |
| <i>Slc7a5</i>    | 5758   | 1.57  | 2.8E-06          | 1.36   | 2.2E-03          |

Table S3 (cont)

| Gene           | Counts | Male  |                  | Female |                  |
|----------------|--------|-------|------------------|--------|------------------|
|                |        | FC    | p <sub>FDR</sub> | FC     | p <sub>FDR</sub> |
| <i>Slc7a7</i>  | 293    | -1.48 | 5.4E-05          | -1.62  | 4.5E-07          |
| <i>Slc9a6</i>  | 7768   | 1.31  | 7.2E-03          | 1.39   | 1.1E-03          |
| <i>Slitrk5</i> | 2183   | -1.56 | 6.1E-09          | -1.59  | 1.4E-09          |
| <i>Smarca2</i> | 10932  | 1.25  | 3.1E-02          | 1.28   | 2.0E-02          |
| <i>Smarca4</i> | 29774  | -1.59 | 5.2E-06          | -1.69  | 2.5E-07          |
| <i>Smarcc2</i> | 27817  | -1.55 | 1.9E-08          | -1.63  | 4.3E-10          |
| <i>Smc1a</i>   | 18407  | -1.37 | 2.0E-06          | -1.37  | 1.7E-06          |
| <i>Snap25</i>  | 6289   | 1.64  | 8.5E-05          | 1.69   | 3.2E-05          |
| <i>Snd1</i>    | 10450  | 1.27  | 3.4E-04          | 1.22   | 3.4E-03          |
| <i>Snx14</i>   | 3275   | 1.73  | 5.1E-49          | 1.81   | 1.9E-56          |
| <i>Son*</i>    | 59465  | -1.32 | 3.8E-03          | -1.14  | 2.2E-01          |
| <i>Sox6</i>    | 5597   | -1.29 | 2.3E-02          | -1.32  | 1.4E-02          |
| <i>Sparcl1</i> | 6073   | -1.59 | 2.4E-04          | -1.48  | 2.5E-03          |
| <i>Srcap</i>   | 371    | -3.68 | 8.6E-20          | -3.26  | 1.9E-16          |
| <i>Ssrp1</i>   | 22251  | -1.31 | 7.7E-05          | -1.43  | 8.9E-08          |
| <i>St7</i>     | 2111   | -1.57 | 5.2E-08          | -1.50  | 1.5E-06          |
| <i>St8sia2</i> | 9960   | -1.84 | 8.8E-05          | -1.91  | 3.1E-05          |
| <i>Stag1</i>   | 8175   | -2.42 | 1.3E-51          | -2.34  | 7.8E-48          |
| <i>Stx1a</i>   | 2912   | 1.38  | 5.2E-03          | 1.36   | 7.0E-03          |
| <i>Stxbp5</i>  | 4749   | 1.46  | 3.0E-06          | 1.50   | 4.8E-07          |
| <i>Syap1</i>   | 4114   | 1.57  | 3.4E-09          | 1.54   | 1.7E-08          |
| <i>Sybu</i>    | 2165   | -1.37 | 4.5E-02          | -1.44  | 1.7E-02          |
| <i>Syn2</i>    | 1795   | 1.63  | 3.8E-02          | 1.78   | 1.3E-02          |
| <i>Syncrip</i> | 22048  | -1.48 | 7.5E-10          | -1.51  | 7.8E-11          |
| <i>Synj1</i>   | 9528   | 1.46  | 1.1E-03          | 1.54   | 1.8E-04          |
| <i>Taf1</i>    | 11862  | 1.26  | 3.9E-04          | 1.36   | 1.7E-06          |
| <i>Taf4</i>    | 3798   | 1.37  | 4.0E-04          | 1.28   | 7.5E-03          |
| <i>Taf6</i>    | 5567   | 1.28  | 8.3E-05          | 1.18   | 1.1E-02          |
| <i>Taok1</i>   | 12512  | -1.49 | 4.8E-06          | -1.36  | 4.8E-04          |
| <i>Tbc1d31</i> | 3810   | 2.35  | 1.3E-34          | 2.40   | 3.0E-36          |
| <i>Tbc1d5</i>  | 1509   | -1.60 | 6.8E-26          | -1.59  | 4.1E-25          |
| <i>Tbl1x</i>   | 11400  | -1.64 | 2.6E-32          | -1.68  | 4.3E-35          |
| <i>Tbl1xr1</i> | 4323   | -1.42 | 2.5E-07          | -1.57  | 2.4E-11          |
| <i>Tbr1</i>    | 3672   | -2.68 | 2.6E-05          | -2.85  | 7.8E-06          |
| <i>Tbx22</i>   | 155    | -4.84 | 3.4E-02          | -8.10  | 4.5E-03          |
| <i>Tceal1</i>  | 996    | -1.82 | 6.2E-13          | -1.66  | 1.7E-09          |
| <i>Tcf4</i>    | 24203  | -1.55 | 9.7E-07          | -1.48  | 1.4E-05          |
| <i>Tcf7l2</i>  | 10030  | -1.73 | 1.7E-02          | -2.47  | 5.4E-05          |
| <i>Tet2</i>    | 6298   | -1.41 | 3.8E-05          | -1.30  | 2.0E-03          |
| <i>Tet3</i>    | 11236  | -1.39 | 1.7E-03          | -1.50  | 8.5E-05          |
| <i>Thbs1</i>   | 7121   | -1.91 | 1.8E-02          | -1.90  | 1.9E-02          |
| <i>Tlk2</i>    | 6144   | -1.42 | 1.2E-14          | -1.44  | 8.3E-16          |
| <i>Tm9sf4</i>  | 4866   | -1.34 | 2.6E-21          | -1.36  | 1.1E-23          |
| <i>Tmem39b</i> | 1217   | -2.03 | 9.6E-28          | -2.26  | 2.6E-36          |
| <i>Tnrc6b</i>  | 8717   | -1.41 | 1.8E-06          | -1.32  | 1.3E-04          |

| Gene            | Counts | Male   |                  | Female |                  |
|-----------------|--------|--------|------------------|--------|------------------|
|                 |        | FC     | p <sub>FDR</sub> | FC     | p <sub>FDR</sub> |
| <i>Tns2</i>     | 1379   | -3.34  | 4.5E-19          | -3.35  | 3.7E-19          |
| <i>Top3b</i>    | 3624   | -1.49  | 1.6E-43          | -1.49  | 2.3E-43          |
| <i>Traf7</i>    | 9194   | 1.42   | 3.8E-11          | 1.32   | 1.8E-07          |
| <i>Trappc6b</i> | 2765   | -1.19  | 1.6E-02          | -1.27  | 6.3E-04          |
| <i>Trim33</i>   | 11213  | -1.29  | 6.9E-05          | -1.24  | 9.5E-04          |
| <i>Trio*</i>    | 14535  | -1.30  | 1.8E-02          | -1.19  | 1.4E-01          |
| <i>Trrap</i>    | 17379  | -1.49  | 2.6E-06          | -1.36  | 3.2E-04          |
| <i>Tsc2</i>     | 11894  | 1.25   | 9.6E-04          | 1.25   | 8.7E-04          |
| <i>Tshz3</i>    | 1699   | 1.28   | 4.1E-02          | 1.43   | 2.1E-03          |
| <i>Tspan17</i>  | 1100   | 2.74   | 6.1E-25          | 2.80   | 7.2E-26          |
| <i>Tspan4</i>   | 996    | 1.40   | 1.0E-03          | 1.36   | 2.8E-03          |
| <i>Ttn†</i>     | 914    | -15.26 | 1.8E-03          | -8.61  | 1.6E-02          |
| <i>Tubgcp5</i>  | 3696   | -1.29  | 2.7E-04          | -1.21  | 8.0E-03          |
| <i>Ube2h</i>    | 11325  | 1.37   | 7.8E-08          | 1.29   | 1.7E-05          |
| <i>Ubr1</i>     | 5748   | -1.47  | 1.3E-06          | -1.37  | 9.7E-05          |
| <i>Ubr5*</i>    | 28114  | -1.28  | 3.3E-03          | -1.18  | 5.5E-02          |
| <i>Unc13a</i>   | 10790  | 2.41   | 2.4E-07          | 2.38   | 4.1E-07          |
| <i>Unc79</i>    | 2448   | -2.25  | 1.4E-06          | -2.15  | 5.9E-06          |
| <i>Upf2</i>     | 7646   | 1.31   | 1.6E-13          | 1.39   | 5.9E-19          |
| <i>Usp15</i>    | 8350   | 1.26   | 6.5E-04          | 1.37   | 1.2E-06          |
| <i>Usp2</i>     | 685    | 3.08   | 1.5E-34          | 2.78   | 1.2E-28          |
| <i>Usp30</i>    | 2549   | 1.25   | 4.6E-09          | 1.15   | 3.5E-04          |
| <i>Usp45</i>    | 4065   | 1.41   | 1.6E-14          | 1.43   | 1.5E-15          |
| <i>Vdr</i>      | 170    | 6.19   | 1.5E-10          | 6.71   | 2.3E-11          |
| <i>Vezf1*</i>   | 398    | -1.31  | 4.8E-02          | -1.11  | 4.8E-01          |
| <i>Vwa7</i>     | 164    | 2.50   | 6.6E-09          | 2.60   | 1.4E-09          |
| <i>Wac</i>      | 11365  | -1.34  | 1.4E-10          | -1.38  | 6.3E-13          |
| <i>Wdfy3</i>    | 12067  | -2.06  | 5.2E-11          | -1.89  | 8.4E-09          |
| <i>Wnt1</i>     | 77     | -2.22  | 1.4E-02          | -2.23  | 1.4E-02          |
| <i>Xpc</i>      | 3233   | 1.40   | 2.2E-17          | 1.41   | 1.2E-17          |
| <i>Xrcc6</i>    | 3705   | 1.36   | 7.6E-09          | 1.32   | 2.1E-07          |
| <i>Yeats2</i>   | 8743   | -1.43  | 3.0E-18          | -1.38  | 3.4E-15          |
| <i>Ywhae</i>    | 73412  | -1.26  | 1.0E-04          | -1.36  | 1.2E-07          |
| <i>Ywhaz</i>    | 43502  | -1.35  | 1.8E-10          | -1.44  | 9.7E-15          |
| <i>Zbtb16</i>   | 881    | 1.86   | 2.2E-04          | 1.70   | 1.7E-03          |
| <i>Zbtb20</i>   | 6592   | -2.52  | 2.0E-14          | -2.13  | 5.5E-10          |
| <i>Zc3h4</i>    | 6993   | -2.62  | 3.8E-24          | -2.79  | 3.1E-27          |
| <i>Zfyve26</i>  | 2417   | -1.46  | 1.9E-09          | -1.33  | 1.0E-05          |
| <i>Zmiz1</i>    | 19376  | -1.45  | 1.1E-03          | -1.53  | 1.8E-04          |
| <i>Zmym2</i>    | 16595  | -1.41  | 2.1E-06          | -1.28  | 6.7E-04          |
| <i>Zmynd11</i>  | 13113  | -1.87  | 7.8E-23          | -1.83  | 1.8E-21          |
| <i>Zmynd8</i>   | 7708   | -1.94  | 1.1E-19          | -1.96  | 3.1E-20          |

\*Significant effect of VPA in one sex only

**Supplemental Table S3.** 399 genes that have been reported to be linked to autism by GWAS (SFARI list) that are also significantly up- or downregulated by VPA (from Table S2) in the fetal mouse brain.
