# Supplementary material for: Rapid effects of valproic acid on the fetal brain transcriptome: implications for brain development and autism
Source: PubMed Central journal article supplement — Transl Psychiatry. 2024 Dec 4;14:482. doi: 10.1038/s41398-024-03179-1 (PMC11618798; doi:10.1038/s41398-024-03179-1), 2024-12-04
Supplement: 41398_2024_3179_MOESM5_ESM.pdf [file 41398_2024_3179_MOESM5_ESM.pdf]

Table S4

| Gene              | Counts | Male   |                  | Female |                  |
|-------------------|--------|--------|------------------|--------|------------------|
|                   |        | FC     | p <sub>FDR</sub> | FC     | p <sub>FDR</sub> |
| <i>Acan</i>       | 1045   | -6.91  | 4.2E-03          | -5.36  | 1.4E-02          |
| <i>Adra2a</i>     | 747    | -1.66  | 2.3E-09          | -2.01  | 1.1E-16          |
| <i>Aif1*</i>      | 113    | -1.49  | 2.7E-04          | -1.15  | 2.4E-01          |
| <i>Ak2</i>        | 7116   | 1.41   | 2.2E-04          | 1.27   | 1.2E-02          |
| <i>Akap8</i>      | 17422  | -1.26  | 3.2E-05          | -1.29  | 6.1E-06          |
| <i>Akap8l</i>     | 8525   | 1.60   | 5.9E-12          | 1.61   | 2.6E-12          |
| <i>Akt1</i>       | 15951  | -1.40  | 5.5E-09          | -1.45  | 4.7E-11          |
| <i>Akt2</i>       | 4906   | -2.03  | 2.9E-50          | -2.08  | 5.6E-54          |
| <i>Amotl2</i>     | 6480   | -1.60  | 8.2E-11          | -1.72  | 4.1E-14          |
| <i>Apbb1ip</i>    | 142    | -1.73  | 1.1E-04          | -1.57  | 1.7E-03          |
| <i>Apc2</i>       | 25582  | -1.41  | 3.9E-02          | -1.48  | 1.7E-02          |
| <i>Arc</i>        | 170    | 1.64   | 1.7E-04          | 1.66   | 1.4E-04          |
| <i>Arntl</i>      | 1203   | 2.17   | 8.8E-45          | 2.07   | 1.6E-39          |
| <i>Asxl1</i>      | 9564   | -1.39  | 7.4E-06          | -1.42  | 1.8E-06          |
| <i>Bcl10</i>      | 2338   | 1.68   | 2.6E-19          | 1.59   | 1.4E-15          |
| <i>Bcl11b</i>     | 7112   | -1.58  | 1.7E-02          | -1.67  | 8.1E-03          |
| <i>Bdnf</i>       | 423    | 2.57   | 9.7E-12          | 3.10   | 3.3E-16          |
| <i>Bmp2</i>       | 291    | -1.49  | 3.6E-02          | -1.68  | 6.3E-03          |
| <i>Bola2</i>      | 2477   | 1.59   | 2.6E-05          | 1.48   | 5.2E-04          |
| <i>Brca1</i>      | 5043   | 1.43   | 4.0E-03          | 1.48   | 1.7E-03          |
| <i>Brd1</i>       | 7073   | -1.39  | 1.9E-04          | -1.47  | 1.5E-05          |
| <i>Brd2</i>       | 19021  | -1.26  | 1.3E-04          | -1.35  | 6.2E-07          |
| <i>Brwd1</i>      | 13743  | -1.37  | 5.2E-06          | -1.29  | 2.3E-04          |
| <i>C1qtnf1</i>    | 444    | -1.45  | 2.7E-04          | -1.43  | 4.5E-04          |
| <i>C2cd5</i>      | 6100   | -1.54  | 1.9E-20          | -1.50  | 3.3E-18          |
| <i>C9orf72</i>    | 4763   | 1.74   | 6.8E-17          | 1.79   | 2.4E-18          |
| <i>Cacnb4*</i>    | 2101   | -1.68  | 3.9E-03          | -1.37  | 9.8E-02          |
| <i>Calm1</i>      | 52234  | 1.44   | 1.0E-23          | 1.44   | 2.4E-24          |
| <i>Camk1</i>      | 1971   | -1.61  | 5.9E-24          | -1.60  | 5.7E-23          |
| <i>Camkk1</i>     | 2077   | 2.66   | 7.2E-41          | 2.53   | 6.9E-37          |
| <i>Camkv</i>      | 1980   | 2.50   | 3.4E-28          | 2.30   | 1.1E-23          |
| <i>Carm1</i>      | 6783   | -1.40  | 1.9E-06          | -1.52  | 1.4E-09          |
| <i>Casq2</i>      | 132    | -14.04 | 5.9E-04          | -7.48  | 1.1E-02          |
| <i>Cbln2</i>      | 2008   | -1.82  | 1.5E-05          | -1.71  | 1.2E-04          |
| <i>Cbs</i>        | 736    | 5.02   | 2.1E-38          | 5.08   | 7.7E-39          |
| <i>Cd200</i>      | 4220   | -2.05  | 1.3E-04          | -2.05  | 1.2E-04          |
| <i>Cdh7*</i>      | 13012  | -1.35  | 8.4E-03          | -1.24  | 6.8E-02          |
| <i>Cdh15*</i>     | 136    | -4.45  | 6.9E-03          | -2.61  | 9.7E-02          |
| <i>Clic6</i>      | 1509   | -1.80  | 3.4E-04          | -1.58  | 6.3E-03          |
| <i>Col6a6</i>     | 212    | -4.15  | 3.8E-04          | -4.13  | 4.2E-04          |
| <i>Creb3</i>      | 2520   | 1.42   | 4.5E-15          | 1.43   | 1.2E-15          |
| <i>Cry1</i>       | 3590   | 2.57   | 1.2E-98          | 2.41   | 5.4E-86          |
| <i>Cry2</i>       | 3881   | 2.01   | 2.8E-27          | 1.94   | 1.1E-24          |
| <i>Csf1r</i>      | 1501   | -1.39  | 8.8E-04          | -1.46  | 1.2E-04          |
| <i>Csgalnact1</i> | 179    | -4.40  | 2.5E-08          | -3.40  | 5.4E-06          |
| <i>Cux1*</i>      | 12750  | -1.17  | 5.2E-02          | -1.27  | 2.6E-03          |
| <i>Cxcl14</i>     | 1869   | -3.84  | 2.6E-04          | -3.31  | 1.3E-03          |
| <i>Dab2</i>       | 6440   | -1.69  | 1.0E-02          | -1.63  | 1.8E-02          |
| <i>Dcbld2</i>     | 9176   | 1.74   | 2.6E-25          | 1.68   | 3.3E-22          |
| <i>Dcps</i>       | 2121   | -1.27  | 3.8E-03          | -1.34  | 3.2E-04          |
| <i>Dhfr</i>       | 4614   | 1.56   | 3.7E-04          | 1.38   | 1.1E-02          |
| <i>Dlg5</i>       | 6522   | -2.95  | 3.9E-61          | -2.96  | 1.3E-61          |

| Gene            | Counts | Male  |                  | Female |                  |
|-----------------|--------|-------|------------------|--------|------------------|
|                 |        | FC    | p <sub>FDR</sub> | FC     | p <sub>FDR</sub> |
| <i>Dlx1*</i>    | 5903   | -1.77 | 1.2E-01          | -2.29  | 2.0E-02          |
| <i>Dnajc12</i>  | 1458   | 4.40  | 5.0E-179         | 4.66   | 1.6E-192         |
| <i>Dop1b</i>    | 4122   | 1.41  | 4.7E-03          | 1.47   | 1.5E-03          |
| <i>Draxin</i>   | 7093   | -1.46 | 1.0E-02          | -1.48  | 8.0E-03          |
| <i>Dyrk1b</i>   | 1249   | -2.21 | 3.1E-12          | -2.12  | 3.7E-11          |
| <i>Ebf1</i>     | 6893   | -1.54 | 6.9E-05          | -1.34  | 9.0E-03          |
| <i>Efna3</i>    | 1500   | 2.61  | 1.2E-19          | 2.86   | 3.1E-23          |
| <i>Egfr</i>     | 1567   | -1.89 | 1.1E-02          | -1.69  | 3.9E-02          |
| <i>Egr1</i>     | 400    | 1.74  | 2.8E-04          | 1.71   | 4.8E-04          |
| <i>Elavl4</i>   | 13824  | -1.58 | 1.1E-05          | -1.45  | 4.3E-04          |
| <i>Emp2</i>     | 457    | -1.49 | 4.9E-02          | -1.62  | 1.6E-02          |
| <i>Eomes</i>    | 3938   | -1.81 | 1.6E-02          | -1.86  | 1.1E-02          |
| <i>Ets2</i>     | 2942   | -1.45 | 8.6E-03          | -1.42  | 1.5E-02          |
| <i>Evx1*</i>    | 102    | -3.25 | 1.3E-02          | -1.42  | 5.1E-01          |
| <i>Farp1</i>    | 6684   | -1.72 | 5.0E-11          | -1.72  | 7.1E-11          |
| <i>Fbxl21</i>   | 373    | 3.18  | 2.4E-56          | 3.23   | 2.4E-57          |
| <i>Fbxl3</i>    | 4323   | -1.77 | 5.5E-43          | -1.70  | 2.2E-37          |
| <i>Fezf1*</i>   | 950    | -1.20 | 4.6E-01          | -1.68  | 2.3E-02          |
| <i>Fgf2</i>     | 295    | -2.94 | 3.9E-15          | -2.79  | 1.1E-13          |
| <i>Fgf17*</i>   | 317    | -1.64 | 1.2E-02          | -1.45  | 6.85E-02         |
| <i>Fgfr1op2</i> | 6435   | 1.26  | 5.9E-05          | 1.31   | 3.4E-06          |
| <i>Flrt2</i>    | 7693   | -1.73 | 2.6E-08          | -1.52  | 3.0E-05          |
| <i>Fos</i>      | 108    | 1.92  | 1.0E-03          | 2.49   | 3.2E-06          |
| <i>Foxa1</i>    | 549    | -1.47 | 2.2E-02          | -1.75  | 5.7E-04          |
| <i>Foxc1</i>    | 1824   | -1.79 | 6.9E-04          | -2.13  | 7.9E-06          |
| <i>Foxo1</i>    | 2595   | 1.84  | 2.8E-13          | 1.80   | 1.8E-12          |
| <i>Foxo3</i>    | 4755   | 1.66  | 1.9E-11          | 1.70   | 2.6E-12          |
| <i>Foxo4</i>    | 3776   | 1.37  | 1.8E-05          | 1.36   | 3.1E-05          |
| <i>Foxo6</i>    | 990    | 1.56  | 1.2E-02          | 1.50   | 2.3E-02          |
| <i>Fzd5</i>     | 608    | 2.35  | 1.0E-10          | 1.80   | 1.3E-05          |
| <i>Gabra1</i>   | 591    | -1.75 | 2.6E-03          | -1.68  | 5.9E-03          |
| <i>Gabra2</i>   | 1504   | -1.70 | 1.8E-02          | -1.80  | 7.2E-03          |
| <i>Gad1</i>     | 3462   | -2.50 | 1.0E-04          | -2.54  | 7.7E-05          |
| <i>Gad2</i>     | 5532   | -3.18 | 2.9E-08          | -3.38  | 4.9E-09          |
| <i>Gas7</i>     | 1662   | -1.64 | 6.9E-03          | -1.67  | 4.8E-03          |
| <i>Gbx1</i>     | 311    | -2.29 | 3.5E-03          | -2.39  | 2.2E-03          |
| <i>Gch1</i>     | 460    | 5.58  | 7.6E-65          | 5.25   | 1.8E-60          |
| <i>Gfpt2</i>    | 1177   | 1.67  | 1.2E-07          | 1.78   | 2.5E-09          |
| <i>Gls2</i>     | 319    | 4.06  | 2.3E-62          | 4.84   | 4.0E-75          |
| <i>Grb2</i>     | 9573   | 1.44  | 5.9E-08          | 1.37   | 3.4E-06          |
| <i>Grm2</i>     | 321    | -1.39 | 2.8E-02          | -1.49  | 7.1E-03          |
| <i>Grm3</i>     | 394    | -1.84 | 2.7E-03          | -1.59  | 2.7E-02          |
| <i>Hapln1</i>   | 1964   | -4.31 | 1.6E-05          | -3.45  | 3.0E-04          |
| <i>Hapln4</i>   | 275    | 27.66 | 3.9E-126         | 23.71  | 2.8E-119         |
| <i>Hes1</i>     | 1561   | -1.52 | 3.5E-06          | -1.70  | 2.6E-09          |
| <i>Hnrnpab</i>  | 47049  | -1.53 | 2.7E-05          | -1.75  | 1.5E-08          |
| <i>Hnrnp41</i>  | 93936  | -1.60 | 9.0E-14          | -1.61  | 5.2E-14          |
| <i>Homer3</i>   | 3874   | -1.27 | 1.0E-02          | -1.43  | 9.4E-05          |
| <i>Hrh3</i>     | 823    | 2.58  | 5.1E-15          | 2.34   | 2.6E-12          |
| <i>Hsp1a</i>    | 235    | 6.27  | 1.4E-31          | 5.59   | 6.7E-28          |
| <i>Hsp1b</i>    | 412    | 5.93  | 3.1E-35          | 5.20   | 1.9E-30          |
| <i>Hsp2</i>     | 996    | 6.34  | 1.0E-96          | 6.09   | 1.8E-92          |

Table S4 (cont)

| Gene            | Counts | Male  |                  | Female |                  |
|-----------------|--------|-------|------------------|--------|------------------|
|                 |        | FC    | p <sub>FDR</sub> | FC     | p <sub>FDR</sub> |
| <i>Icam5</i>    | 104    | 16.47 | 6.4E-39          | 16.73  | 3.0E-37          |
| <i>Isl1</i>     | 3389   | -1.54 | 1.4E-03          | -1.45  | 6.9E-03          |
| <i>Itpka</i>    | 175    | 17.28 | 1.1E-58          | 10.83  | 3.3E-44          |
| <i>JunB</i>     | 206    | 2.19  | 5.8E-10          | 2.20   | 5.4E-10          |
| <i>Kbtbd2</i>   | 4187   | -1.24 | 1.2E-05          | -1.31  | 2.0E-08          |
| <i>Kcnmb2*</i>  | 329    | -2.11 | 5.5E-04          | -1.45  | 1.1E-01          |
| <i>Kif17</i>    | 387    | 4.17  | 2.5E-27          | 4.83   | 1.1E-32          |
| <i>Klf4</i>     | 882    | -1.56 | 1.3E-02          | -1.59  | 9.9E-03          |
| <i>Kras</i>     | 16185  | 1.38  | 2.1E-07          | 1.32   | 6.2E-06          |
| <i>Lamp5</i>    | 587    | -6.05 | 9.0E-04          | -4.36  | 7.7E-03          |
| <i>Lhx8</i>     | 610    | -2.58 | 7.4E-03          | -2.81  | 3.5E-03          |
| <i>Lmx1a</i>    | 1011   | -1.57 | 1.5E-03          | -1.81  | 1.9E-05          |
| <i>Lrp6*</i>    | 10654  | -1.26 | 1.0E-04          | -1.14  | 3.4E-02          |
| <i>Lrrk1</i>    | 709    | -2.99 | 2.8E-13          | -2.85  | 3.1E-12          |
| <i>Lrrk2</i>    | 647    | -2.40 | 1.1E-08          | -2.20  | 2.9E-07          |
| <i>Maf</i>      | 3212   | -1.63 | 3.8E-06          | -1.64  | 2.8E-06          |
| <i>Mafb</i>     | 999    | -1.57 | 8.5E-05          | -1.71  | 2.2E-06          |
| <i>Map2</i>     | 68999  | -1.59 | 2.1E-04          | -1.41  | 7.8E-03          |
| <i>Map2k1</i>   | 4241   | 1.70  | 2.3E-18          | 1.67   | 3.6E-17          |
| <i>Mapk1</i>    | 20963  | 1.33  | 3.2E-15          | 1.29   | 7.0E-13          |
| <i>Mapk14</i>   | 7022   | 1.55  | 4.6E-40          | 1.52   | 9.9E-36          |
| <i>Marcks</i>   | 64056  | -2.10 | 3.1E-25          | -2.26  | 2.7E-30          |
| <i>Mboat7</i>   | 5265   | 1.93  | 3.0E-26          | 1.91   | 2.5E-25          |
| <i>Mcam</i>     | 4295   | 1.79  | 4.6E-17          | 1.65   | 5.1E-13          |
| <i>Mef2d</i>    | 6108   | 1.54  | 1.3E-05          | 1.47   | 1.1E-04          |
| <i>Metrn</i>    | 4092   | 2.39  | 5.0E-10          | 2.07   | 2.6E-07          |
| <i>Mllt11</i>   | 16031  | -1.56 | 2.5E-03          | -1.49  | 8.0E-03          |
| <i>Ncoa3</i>    | 5325   | 1.35  | 1.9E-06          | 1.38   | 3.7E-07          |
| <i>Ndst3</i>    | 2340   | -1.64 | 9.5E-05          | -1.47  | 3.0E-03          |
| <i>Nell2*</i>   | 9177   | -1.22 | 5.5E-02          | -1.29  | 1.1E-02          |
| <i>Neurod1</i>  | 2403   | -1.43 | 1.4E-03          | -1.58  | 3.5E-05          |
| <i>Neurog1</i>  | 475    | -2.00 | 4.6E-03          | -2.49  | 1.5E-04          |
| <i>Neurog2*</i> | 6066   | -1.37 | 1.4E-01          | -1.66  | 1.3E-02          |
| <i>Nfatc1</i>   | 283    | -1.52 | 3.3E-04          | -1.63  | 2.2E-05          |
| <i>Nfatc2</i>   | 689    | -1.65 | 4.9E-03          | -1.60  | 8.5E-03          |
| <i>Nfatc4</i>   | 3812   | -2.04 | 9.2E-09          | -2.10  | 2.2E-09          |
| <i>Nhej1</i>    | 194    | -2.15 | 1.1E-16          | -2.40  | 3.4E-21          |
| <i>Nhlh1</i>    | 2918   | -1.63 | 8.1E-06          | -1.62  | 1.1E-05          |
| <i>Nhlh2</i>    | 5362   | -2.89 | 1.7E-16          | -2.74  | 4.9E-15          |
| <i>Nkx2-1*</i>  | 2086   | -1.74 | 1.2E-01          | -2.46  | 8.6E-03          |
| <i>Nkx2-4*†</i> | 120    | -1.30 | 2.9E-01          | -2.42  | 8.7E-05          |
| <i>Nprl3</i>    | 1675   | -1.37 | 3.3E-11          | -1.29  | 1.2E-07          |
| <i>Nras</i>     | 15777  | -1.36 | 4.5E-09          | -1.42  | 1.2E-11          |
| <i>Ntn4</i>     | 1222   | -1.88 | 2.1E-07          | -2.09  | 1.1E-09          |
| <i>Odc1</i>     | 24222  | 1.49  | 5.0E-06          | 1.43   | 5.3E-05          |
| <i>Ogt</i>      | 39637  | -1.51 | 1.5E-06          | -1.30  | 2.8E-03          |
| <i>Olig1*</i>   | 341    | 2.11  | 7.4E-05          | 1.49   | 4.5E-02          |
| <i>Otp</i>      | 1318   | -2.64 | 2.1E-08          | -2.31  | 1.8E-06          |
| <i>P2rx7</i>    | 210    | -2.26 | 6.8E-06          | -1.67  | 6.3E-03          |
| <i>Palm3</i>    | 720    | 1.99  | 7.7E-06          | 1.89   | 4.2E-05          |
| <i>Pax7</i>     | 1240   | -1.74 | 3.4E-03          | -1.68  | 7.0E-03          |
| <i>Pdk1</i>     | 4064   | 1.24  | 1.1E-02          | 1.33   | 6.5E-04          |

| Gene            | Counts | Male  |                  | Female |                  |
|-----------------|--------|-------|------------------|--------|------------------|
|                 |        | FC    | p <sub>FDR</sub> | FC     | p <sub>FDR</sub> |
| <i>Per3</i>     | 1173   | 1.85  | 8.7E-21          | 1.92   | 5.5E-23          |
| <i>Pigh</i>     | 1044   | -1.39 | 5.5E-07          | -1.38  | 8.7E-07          |
| <i>Pigp</i>     | 2067   | -1.62 | 3.5E-20          | -1.60  | 1.9E-19          |
| <i>Pik3cb</i>   | 2150   | 1.73  | 3.6E-22          | 1.77   | 1.2E-23          |
| <i>Pik3r4</i>   | 3800   | 1.26  | 3.3E-05          | 1.24   | 1.7E-04          |
| <i>Plcg2</i>    | 339    | 1.95  | 1.2E-07          | 1.74   | 1.6E-05          |
| <i>Plk1</i>     | 3447   | -1.54 | 5.4E-03          | -1.83  | 7.0E-05          |
| <i>Pnlsr</i>    | 26071  | -1.95 | 1.5E-24          | -1.81  | 1.0E-19          |
| <i>Ppm1j</i>    | 282    | 7.24  | 1.4E-36          | 7.60   | 4.4E-38          |
| <i>Ppp3cb</i>   | 14492  | -1.25 | 1.0E-02          | -1.29  | 3.0E-03          |
| <i>Ppp3cc</i>   | 516    | -1.27 | 6.9E-03          | -1.25  | 1.2E-02          |
| <i>Ptk2b</i>    | 117    | 1.75  | 1.6E-03          | 1.68   | 3.7E-03          |
| <i>Ptpn1</i>    | 7485   | 1.59  | 8.2E-10          | 1.45   | 1.3E-06          |
| <i>Ptpn5</i>    | 4140   | -1.59 | 1.2E-02          | -1.49  | 3.7E-02          |
| <i>Ptpro</i>    | 3982   | -1.70 | 1.0E-02          | -1.67  | 1.4E-02          |
| <i>Pttg1ip</i>  | 4768   | 1.30  | 1.4E-04          | 1.28   | 3.9E-04          |
| <i>Pura</i>     | 2394   | 1.32  | 2.7E-05          | 1.35   | 5.1E-06          |
| <i>Raf1</i>     | 11657  | -1.62 | 2.3E-24          | -1.60  | 1.8E-23          |
| <i>Rarb</i>     | 1030   | -2.09 | 2.6E-05          | -2.27  | 3.0E-06          |
| <i>Rcan1</i>    | 3802   | 1.67  | 4.1E-27          | 1.59   | 4.6E-22          |
| <i>Rmnd5b</i>   | 2194   | 1.35  | 3.1E-10          | 1.32   | 7.3E-09          |
| <i>Rnd3</i>     | 17191  | -1.47 | 1.3E-07          | -1.44  | 6.9E-07          |
| <i>Rnf19b</i>   | 2770   | 1.38  | 7.2E-05          | 1.32   | 7.2E-04          |
| <i>Robo3*</i>   | 6624   | -1.73 | 5.8E-03          | -1.23  | 3.4E-01          |
| <i>Robo4</i>    | 695    | -2.11 | 1.5E-17          | -2.21  | 1.1E-19          |
| <i>Rtn4rl1</i>  | 469    | 2.04  | 4.0E-09          | 2.01   | 7.6E-09          |
| <i>Runx1</i>    | 381    | -3.19 | 1.6E-04          | -2.98  | 4.3E-04          |
| <i>Runx2</i>    | 782    | -3.89 | 1.5E-05          | -3.99  | 1.1E-05          |
| <i>Rxrb</i>     | 4358   | -1.27 | 5.6E-06          | -1.34  | 3.0E-08          |
| <i>S1pr1</i>    | 1963   | -1.25 | 2.4E-06          | -1.38  | 4.0E-12          |
| <i>Sema3a</i>   | 2749   | -2.24 | 2.5E-07          | -1.77  | 3.5E-04          |
| <i>Setd4</i>    | 686    | -1.85 | 1.3E-19          | -1.92  | 5.7E-22          |
| <i>Sfrp2</i>    | 4464   | -1.80 | 4.0E-03          | -1.75  | 6.1E-03          |
| <i>Sh3bgr</i>   | 135    | 1.74  | 1.1E-02          | 1.97   | 1.9E-03          |
| <i>Shc2</i>     | 2467   | -1.42 | 1.9E-05          | -1.41  | 3.2E-05          |
| <i>Shc4</i>     | 325    | -1.69 | 1.4E-05          | -1.50  | 1.0E-03          |
| <i>Shox2</i>    | 3795   | -1.95 | 6.0E-05          | -2.26  | 8.6E-07          |
| <i>Sim2</i>     | 224    | -2.06 | 9.2E-03          | -2.27  | 2.9E-03          |
| <i>Sirt1</i>    | 3366   | -1.49 | 5.2E-15          | -1.48  | 1.1E-14          |
| <i>Slc17a6</i>  | 5910   | -2.41 | 2.9E-09          | -2.42  | 2.4E-09          |
| <i>Slc17a7</i>  | 847    | 1.63  | 1.3E-02          | 1.63   | 1.4E-02          |
| <i>Slc17a8</i>  | 404    | -1.72 | 1.1E-03          | -1.43  | 3.8E-02          |
| <i>Slc17a9</i>  | 221    | 5.87  | 1.2E-33          | 6.74   | 2.1E-38          |
| <i>Slc35e1</i>  | 5103   | 1.48  | 2.7E-16          | 1.42   | 3.2E-13          |
| <i>Slc38a1</i>  | 18710  | -1.71 | 3.2E-11          | -1.74  | 9.4E-12          |
| <i>Slc8a1</i>   | 4042   | -2.30 | 2.5E-05          | -1.79  | 4.2E-03          |
| <i>Slc8a2</i>   | 3842   | 1.99  | 4.1E-15          | 2.04   | 4.2E-16          |
| <i>Slc9a3r1</i> | 2902   | 3.04  | 2.4E-31          | 2.94   | 1.9E-29          |
| <i>Slit2</i>    | 10361  | 1.31  | 2.6E-04          | 1.46   | 2.2E-07          |
| <i>Slitrk1</i>  | 1872   | -1.44 | 8.6E-03          | -1.46  | 6.4E-03          |
| <i>Slitrk4</i>  | 1131   | 1.62  | 2.8E-05          | 1.72   | 2.3E-06          |
| <i>Smarb1</i>   | 7275   | -1.64 | 2.2E-12          | 1.76   | 7.7E-16          |

Table 2 (cont)

| Gene             | Counts | Male  |                  | Female |                  |
|------------------|--------|-------|------------------|--------|------------------|
|                  |        | FC    | p <sub>FDR</sub> | FC     | p <sub>FDR</sub> |
| <i>Smyd2</i>     | 1864   | -1.24 | 3.7E-04          | -1.28  | 4.3E-05          |
| <i>Sos1</i>      | 9101   | 1.25  | 6.5E-03          | 1.29   | 2.0E-03          |
| <i>Sox2*</i>     | 10110  | -1.21 | 3.3E-01          | -1.50  | 2.4E-02          |
| <i>Sp1</i>       | 8616   | -1.26 | 7.3E-07          | -1.20  | 7.9E-05          |
| <i>Sp2</i>       | 1254   | -1.49 | 2.2E-03          | -1.63  | 1.5E-04          |
| <i>Sp3</i>       | 9744   | -1.51 | 3.1E-11          | -1.49  | 7.0E-11          |
| <i>Sparc</i>     | 25277  | -1.37 | 2.6E-02          | -1.40  | 1.8E-02          |
| <i>Src</i>       | 5937   | -2.49 | 4.8E-21          | -2.70  | 7.6E-25          |
| <i>Srebfl1*</i>  | 4265   | 1.38  | 5.8E-04          | 1.21   | 5.7E-02          |
| <i>Sst</i>       | 803    | -1.79 | 1.0E-02          | -1.86  | 6.2E-03          |
| <i>Stat3</i>     | 5850   | 2.72  | 1.2E-44          | 2.69   | 1.7E-43          |
| <i>Stc1</i>      | 534    | 1.35  | 8.9E-03          | 1.35   | 9.0E-03          |
| <i>Stc2</i>      | 494    | 2.83  | 2.1E-23          | 2.55   | 4.8E-19          |
| <i>Stx18</i>     | 1175   | -1.59 | 1.1E-09          | -1.68  | 9.8E-12          |
| <i>Sumo3</i>     | 6505   | -1.39 | 4.8E-09          | -1.51  | 3.1E-13          |
| <i>Tacc2</i>     | 7124   | -1.50 | 5.9E-06          | -1.52  | 2.5E-06          |
| <i>Tctn1</i>     | 4106   | 1.47  | 1.8E-08          | 1.41   | 6.7E-07          |
| <i>Tctn3</i>     | 1997   | 1.94  | 6.3E-22          | 1.99   | 1.9E-23          |
| <i>Tfap2a</i>    | 954    | -1.85 | 2.8E-03          | -1.71  | 1.1E-02          |
| <i>Tgfb2</i>     | 2234   | -2.52 | 4.1E-13          | -2.34  | 2.9E-11          |
| <i>Tgfb3</i>     | 1115   | -2.03 | 1.7E-04          | -1.96  | 4.0E-04          |
| <i>Th</i>        | 476    | -1.42 | 5.1E-03          | -1.52  | 6.6E-04          |
| <i>Tlr3</i>      | 167    | -1.75 | 1.2E-10          | -1.95  | 2.6E-14          |
| <i>Tmem108</i>   | 1225   | 1.53  | 7.9E-06          | 1.37   | 1.4E-03          |
| <i>Tmem163</i>   | 1496   | -1.62 | 1.4E-05          | -1.68  | 2.4E-06          |
| <i>Tnfrsf12a</i> | 297    | 4.65  | 1.9E-26          | 5.05   | 7.9E-29          |
| <i>Top3a</i>     | 2357   | 1.71  | 1.3E-20          | 1.66   | 1.2E-18          |
| <i>Trib2</i>     | 8489   | -1.73 | 3.2E-07          | -1.73  | 3.4E-07          |
| <i>Trnp1</i>     | 298    | 1.45  | 3.8E-02          | 1.55   | 1.4E-02          |
| <i>Trpm4</i>     | 1776   | 2.04  | 1.2E-15          | 2.11   | 5.0E-17          |
| <i>Tubb3</i>     | 58234  | -1.25 | 1.8E-02          | -1.27  | 1.4E-02          |
| <i>Tug1</i>      | 14599  | -1.19 | 1.6E-04          | -1.26  | 2.8E-07          |
| <i>Twf2</i>      | 1910   | 1.56  | 1.4E-10          | 1.58   | 3.3E-11          |
| <i>Unc5b</i>     | 3707   | 1.69  | 4.9E-08          | 1.41   | 4.4E-04          |
| <i>Unc5c</i>     | 4631   | -2.20 | 1.5E-06          | -1.86  | 2.1E-04          |
| <i>Usp34*</i>    | 19191  | -1.41 | 6.4E-03          | -1.17  | 2.7E-01          |
| <i>Vegfc</i>     | 373    | -1.52 | 4.0E-06          | -1.73  | 1.1E-09          |
| <i>Vegfd</i>     | 111    | -2.21 | 2.6E-04          | -1.91  | 3.5E-03          |
| <i>Wdr4</i>      | 3027   | -1.43 | 2.4E-11          | -1.47  | 9.8E-13          |
| <i>Wdr41</i>     | 1513   | -2.70 | 1.1E-116         | -2.73  | 2.1E-118         |
| <i>Wnt10b</i>    | 116    | -3.73 | 2.4E-03          | -3.29  | 6.8E-03          |
| <i>Wnt16</i>     | 127    | 2.71  | 1.2E-03          | 3.13   | 2.0E-04          |
| <i>Wnt3*</i>     | 639    | -1.19 | 1.3E-01          | -1.37  | 5.3E-03          |
| <i>Wnt3a</i>     | 207    | -3.64 | 1.6E-12          | -4.01  | 2.7E-14          |
| <i>Wnt4*</i>     | 470    | -1.70 | 2.3E-02          | -1.39  | 1.8E-01          |
| <i>Wnt5a</i>     | 3387   | -2.78 | 5.2E-10          | -2.58  | 1.0E-08          |
| <i>Wnt7b</i>     | 4194   | -1.68 | 1.4E-06          | -1.97  | 1.5E-10          |
| <i>Wsb1</i>      | 31033  | -1.42 | 6.3E-08          | -1.35  | 2.8E-06          |
| <i>Zfp804a</i>   | 553    | -1.88 | 3.6E-03          | -1.68  | 2.0E-02          |
| <i>Zmym4</i>     | 12662  | -1.53 | 7.8E-14          | -1.45  | 5.7E-11          |

\* Significant effect of VPA in one sex only

**Supplemental Table S4.** 258 genes involved in brain development and neurodevelopmental disorders that are dysregulated in the fetal brain by VPA (from Table S2) that have **not** been reported to be associated with autism in GWAS.
